# Supplementary material
Source: MDPI journal article supplement (https://www.mdpi.com/2077-1312/10/8/1051)
Supplement: s1 [file s1]

Archive with 274 entries (249 files):
- DMS/
- DMS/DMS/
- DMS/DMS.sln
- DMS/DMS.suo
- DMS/DMS/addDeviceInfo.cs
- DMS/DMS/addDeviceInfo.Designer.cs
- DMS/DMS/addDeviceInfo.resx
- DMS/DMS/addMjbInfo.cs
- DMS/DMS/addMjbInfo.Designer.cs
- DMS/DMS/addMjbInfo.resx
- DMS/DMS/bin/
- DMS/DMS/bin/Debug/
- DMS/DMS/bin/Debug/baidu.html
- DMS/DMS/bin/Debug/baidu.html.bak
- DMS/DMS/bin/Debug/baidu1.html
- DMS/DMS/bin/Debug/dataManager.xml
- DMS/DMS/bin/Debug/digifaw.ttf
- DMS/DMS/bin/Debug/DMS.exe
- DMS/DMS/bin/Debug/DMS.pdb
- DMS/DMS/bin/Debug/DMS.vshost.exe
- DMS/DMS/bin/Debug/DMS.vshost.exe.manifest
- DMS/DMS/bin/Debug/LocalIPandPort.xml
- DMS/DMS/bin/Debug/LogFile.txt
- DMS/DMS/bin/Debug/mysql.data.dll
- DMS/DMS/bin/Debug/▒Ω╠Γ└╕_5.jpg
- DMS/DMS/bin/Release/
- DMS/DMS/CRC32.cs
- DMS/DMS/DCDataInfo.cs
- DMS/DMS/DCDataInfo.Designer.cs
- DMS/DMS/DCDataInfo.resx
- DMS/DMS/deviceInfo.cs
- DMS/DMS/deviceInfo.Designer.cs
- DMS/DMS/deviceInfo.resx
- DMS/DMS/DMS.csproj
- DMS/DMS/FontClass.cs
- DMS/DMS/GPSInfo.cs
- DMS/DMS/GPSInfo.Designer.cs
- DMS/DMS/GPSInfo.resx
- DMS/DMS/jbInfo.cs
- DMS/DMS/jbInfo.Designer.cs
- DMS/DMS/jbInfo.resx
- DMS/DMS/LogClass.cs
- DMS/DMS/Main.cs
- DMS/DMS/Main.Designer.cs
- DMS/DMS/Main.resx
- DMS/DMS/MjbManagement.cs
- DMS/DMS/MjbManagement.Designer.cs
- DMS/DMS/MjbManagement.resx
- DMS/DMS/modifyDeviceInfo.cs
- DMS/DMS/modifyDeviceInfo.Designer.cs
- DMS/DMS/modifyDeviceInfo.resx
- DMS/DMS/modifyMjbInfo.cs
- DMS/DMS/modifyMjbInfo.Designer.cs
- DMS/DMS/modifyMjbInfo.resx
- DMS/DMS/MyServerClass.cs
- DMS/DMS/NodeManagement.cs
- DMS/DMS/NodeManagement.Designer.cs
- DMS/DMS/NodeManagement.resx
- DMS/DMS/obj/
- DMS/DMS/obj/x86/
- DMS/DMS/obj/x86/Debug/
- DMS/DMS/obj/x86/Debug/DesignTimeResolveAssemblyReferences.cache
- DMS/DMS/obj/x86/Debug/DesignTimeResolveAssemblyReferencesInput.cache
- DMS/DMS/obj/x86/Debug/DMS.addDeviceInfo.resources
- DMS/DMS/obj/x86/Debug/DMS.addMjbInfo.resources
- DMS/DMS/obj/x86/Debug/DMS.csproj.FileListAbsolute.txt
- DMS/DMS/obj/x86/Debug/DMS.csproj.GenerateResource.Cache
- DMS/DMS/obj/x86/Debug/DMS.csprojResolveAssemblyReference.cache
- DMS/DMS/obj/x86/Debug/DMS.DCDataInfo.resources
- DMS/DMS/obj/x86/Debug/DMS.deviceInfo.resources
- DMS/DMS/obj/x86/Debug/DMS.exe
- DMS/DMS/obj/x86/Debug/DMS.GPSInfo.resources
- DMS/DMS/obj/x86/Debug/DMS.jbInfo.resources
- DMS/DMS/obj/x86/Debug/DMS.Main.resources
- DMS/DMS/obj/x86/Debug/DMS.MjbManagement.resources
- DMS/DMS/obj/x86/Debug/DMS.modifyDeviceInfo.resources
- DMS/DMS/obj/x86/Debug/DMS.modifyMjbInfo.resources
- DMS/DMS/obj/x86/Debug/DMS.NodeManagement.resources
- DMS/DMS/obj/x86/Debug/DMS.pdb
- DMS/DMS/obj/x86/Debug/DMS.Properties.Resources.resources
- DMS/DMS/obj/x86/Debug/TempPE/
- DMS/DMS/Program.cs
- DMS/DMS/Properties/
- DMS/DMS/Properties/AssemblyInfo.cs
- DMS/DMS/Properties/Resources.Designer.cs
- DMS/DMS/Properties/Resources.resx
- DMS/DMS/Properties/Settings.Designer.cs
- DMS/DMS/Properties/Settings.settings
- DMS/DMS/ReceiveMsgClass.cs
- DMS/DMS/SqlHelper.cs
- OSNSystem/
- OSNSystem/OSNSystem/
- OSNSystem/OSNSystem/.vs/
- OSNSystem/OSNSystem/.vs/OSNSystem/
- OSNSystem/OSNSystem/.vs/OSNSystem/v16/
- OSNSystem/OSNSystem/.vs/OSNSystem/v16/.suo
- OSNSystem/OSNSystem/.vs/OSNSystem/v17/
- OSNSystem/OSNSystem/.vs/OSNSystem/v17/.suo
- OSNSystem/OSNSystem/OSNSystem/
- OSNSystem/OSNSystem/OSNSystem.sln
- OSNSystem/OSNSystem/OSNSystem.suo
- OSNSystem/OSNSystem/OSNSystem/1MySerClass.cs
- OSNSystem/OSNSystem/OSNSystem/1MySerClass2.cs
- OSNSystem/OSNSystem/OSNSystem/1MySerClass3.cs
- OSNSystem/OSNSystem/OSNSystem/2DrawClass.cs
- OSNSystem/OSNSystem/OSNSystem/3ReceieveMsgClass.cs
- OSNSystem/OSNSystem/OSNSystem/3ReceieveMsgClass2.cs
- OSNSystem/OSNSystem/OSNSystem/4DrawSensor.cs
- OSNSystem/OSNSystem/OSNSystem/4MyClientClass.cs
- OSNSystem/OSNSystem/OSNSystem/4MyClientClass2.cs
- OSNSystem/OSNSystem/OSNSystem/4MyClientClass3.cs
- OSNSystem/OSNSystem/OSNSystem/app.config
- OSNSystem/OSNSystem/OSNSystem/bin/
- OSNSystem/OSNSystem/OSNSystem/bin/Debug/
- OSNSystem/OSNSystem/OSNSystem/bin/Debug/AlarmLog_comm.txt
- OSNSystem/OSNSystem/OSNSystem/bin/Debug/AlarmLog_diskError.txt
- OSNSystem/OSNSystem/OSNSystem/bin/Debug/AlarmLog_diskFull.txt
- OSNSystem/OSNSystem/OSNSystem/bin/Debug/AlarmLog_shelter.txt
- OSNSystem/OSNSystem/OSNSystem/bin/Debug/AlarmLog_soundAlarm.txt
- OSNSystem/OSNSystem/OSNSystem/bin/Debug/appiv3.0.js
- OSNSystem/OSNSystem/OSNSystem/bin/Debug/AreaRestriction_min.js
- OSNSystem/OSNSystem/OSNSystem/bin/Debug/avnetsdk.dll
- OSNSystem/OSNSystem/OSNSystem/bin/Debug/baidu.html
- OSNSystem/OSNSystem/OSNSystem/bin/Debug/baidu.html.bak
- OSNSystem/OSNSystem/OSNSystem/bin/Debug/baidu1.html
- OSNSystem/OSNSystem/OSNSystem/bin/Debug/BouncyCastle.Crypto.dll
- OSNSystem/OSNSystem/OSNSystem/bin/Debug/CommandLogFile.txt
- OSNSystem/OSNSystem/OSNSystem/bin/Debug/dataManager.xml
- OSNSystem/OSNSystem/OSNSystem/bin/Debug/dhconfigsdk.dll
- OSNSystem/OSNSystem/OSNSystem/bin/Debug/dhconfigsdk.lib
- OSNSystem/OSNSystem/OSNSystem/bin/Debug/dhnetsdk.dll
- OSNSystem/OSNSystem/OSNSystem/bin/Debug/dhnetsdk.lib
- OSNSystem/OSNSystem/OSNSystem/bin/Debug/dhplay.dll
- OSNSystem/OSNSystem/OSNSystem/bin/Debug/digifaw.ttf
- OSNSystem/OSNSystem/OSNSystem/bin/Debug/favicon (1).ico
- OSNSystem/OSNSystem/OSNSystem/bin/Debug/favicon.ico
- OSNSystem/OSNSystem/OSNSystem/bin/Debug/fisheye.dll
- OSNSystem/OSNSystem/OSNSystem/bin/Debug/Formula.xml
- OSNSystem/OSNSystem/OSNSystem/bin/Debug/getModules3.0.js
- OSNSystem/OSNSystem/OSNSystem/bin/Debug/Google.Protobuf.dll
- OSNSystem/OSNSystem/OSNSystem/bin/Debug/Infra.dll
- OSNSystem/OSNSystem/OSNSystem/bin/Debug/IPandPortConfig.xml
- OSNSystem/OSNSystem/OSNSystem/bin/Debug/IvsDrawer.dll
- OSNSystem/OSNSystem/OSNSystem/bin/Debug/jquery-1.8.3.min.js
- OSNSystem/OSNSystem/OSNSystem/bin/Debug/Json.dll
- OSNSystem/OSNSystem/OSNSystem/bin/Debug/K4os.Compression.LZ4.dll
- OSNSystem/OSNSystem/OSNSystem/bin/Debug/K4os.Compression.LZ4.Streams.dll
- OSNSystem/OSNSystem/OSNSystem/bin/Debug/K4os.Hash.xxHash.dll
- OSNSystem/OSNSystem/OSNSystem/bin/Debug/langchn.ini
- OSNSystem/OSNSystem/OSNSystem/bin/Debug/LocalIPandPort.xml
- OSNSystem/OSNSystem/OSNSystem/bin/Debug/LogConnectStatus.txt
- OSNSystem/OSNSystem/OSNSystem/bin/Debug/LogFile.txt
- OSNSystem/OSNSystem/OSNSystem/bin/Debug/MySql.Data (2).dll
- OSNSystem/OSNSystem/OSNSystem/bin/Debug/NetFramework.dll
- OSNSystem/OSNSystem/OSNSystem/bin/Debug/NetSDKDemo.exe
- OSNSystem/OSNSystem/OSNSystem/bin/Debug/OSNSystem.exe
- OSNSystem/OSNSystem/OSNSystem/bin/Debug/OSNSystem.exe.config
- OSNSystem/OSNSystem/OSNSystem/bin/Debug/OSNSystem.instr.pdb
- OSNSystem/OSNSystem/OSNSystem/bin/Debug/OSNSystem.pdb
- OSNSystem/OSNSystem/OSNSystem/bin/Debug/OSNSystem.vshost.exe
- OSNSystem/OSNSystem/OSNSystem/bin/Debug/OSNSystem.vshost.exe.config
- OSNSystem/OSNSystem/OSNSystem/bin/Debug/OSNSystem.vshost.exe.manifest
- OSNSystem/OSNSystem/OSNSystem/bin/Debug/Stream.dll
- OSNSystem/OSNSystem/OSNSystem/bin/Debug/StreamSvr.dll
- OSNSystem/OSNSystem/OSNSystem/bin/Debug/System.Buffers.dll
- OSNSystem/OSNSystem/OSNSystem/bin/Debug/System.Memory.dll
- OSNSystem/OSNSystem/OSNSystem/bin/Debug/TeeChart.dll
- OSNSystem/OSNSystem/OSNSystem/bin/Debug/TeeChart.xml
- OSNSystem/OSNSystem/OSNSystem/bin/Debug/Ubiety.Dns.Core.dll
- OSNSystem/OSNSystem/OSNSystem/bin/Debug/ZstdNet.dll
- OSNSystem/OSNSystem/OSNSystem/bin/Release/
- OSNSystem/OSNSystem/OSNSystem/cmdCollectSet.cs
- OSNSystem/OSNSystem/OSNSystem/cmdCollectSet.Designer.cs
- OSNSystem/OSNSystem/OSNSystem/cmdCollectSet.resx
- OSNSystem/OSNSystem/OSNSystem/cmdSet.cs
- OSNSystem/OSNSystem/OSNSystem/cmdSet.designer.cs
- OSNSystem/OSNSystem/OSNSystem/cmdSet.resx
- OSNSystem/OSNSystem/OSNSystem/commandExecuteDO.cs
- OSNSystem/OSNSystem/OSNSystem/CRC32.cs
- OSNSystem/OSNSystem/OSNSystem/dataList.cs
- OSNSystem/OSNSystem/OSNSystem/dataManager.xml
- OSNSystem/OSNSystem/OSNSystem/draw.cs
- OSNSystem/OSNSystem/OSNSystem/drawTotal.cs
- OSNSystem/OSNSystem/OSNSystem/ECSSocket.cs
- OSNSystem/OSNSystem/OSNSystem/favicon.ico
- OSNSystem/OSNSystem/OSNSystem/FontClass.cs
- OSNSystem/OSNSystem/OSNSystem/LogClass.cs
- OSNSystem/OSNSystem/OSNSystem/LogCommand.cs
- OSNSystem/OSNSystem/OSNSystem/LogConnect.cs
- OSNSystem/OSNSystem/OSNSystem/LogDataUpLoad.cs
- OSNSystem/OSNSystem/OSNSystem/LogFaultUpLoad.cs
- OSNSystem/OSNSystem/OSNSystem/Main.cs
- OSNSystem/OSNSystem/OSNSystem/Main.Designer.cs
- OSNSystem/OSNSystem/OSNSystem/Main.resx
- OSNSystem/OSNSystem/OSNSystem/mysql.data.dll
- OSNSystem/OSNSystem/OSNSystem/obj/
- OSNSystem/OSNSystem/OSNSystem/obj/x86/
- OSNSystem/OSNSystem/OSNSystem/obj/x86/Debug/
- OSNSystem/OSNSystem/OSNSystem/obj/x86/Debug/.NETFramework,Version=v4.0.AssemblyAttributes.cs
- OSNSystem/OSNSystem/OSNSystem/obj/x86/Debug/.NETFramework,Version=v4.5.2.AssemblyAttributes.cs
- OSNSystem/OSNSystem/OSNSystem/obj/x86/Debug/.NETFramework,Version=v4.6.2.AssemblyAttributes.cs
- OSNSystem/OSNSystem/OSNSystem/obj/x86/Debug/.NETFramework,Version=v4.8.AssemblyAttributes.cs
- OSNSystem/OSNSystem/OSNSystem/obj/x86/Debug/DesignTimeResolveAssemblyReferences.cache
- OSNSystem/OSNSystem/OSNSystem/obj/x86/Debug/DesignTimeResolveAssemblyReferencesInput.cache
- OSNSystem/OSNSystem/OSNSystem/obj/x86/Debug/OSNSystem.cmdCollectSet.resources
- OSNSystem/OSNSystem/OSNSystem/obj/x86/Debug/OSNSystem.cmdSet.resources
- OSNSystem/OSNSystem/OSNSystem/obj/x86/Debug/OSNSystem.commandAdd.resources
- OSNSystem/OSNSystem/OSNSystem/obj/x86/Debug/OSNSystem.csproj.AssemblyReference.cache
- OSNSystem/OSNSystem/OSNSystem/obj/x86/Debug/OSNSystem.csproj.CopyComplete
- OSNSystem/OSNSystem/OSNSystem/obj/x86/Debug/OSNSystem.csproj.CoreCompileInputs.cache
- OSNSystem/OSNSystem/OSNSystem/obj/x86/Debug/OSNSystem.csproj.FileListAbsolute.txt
- OSNSystem/OSNSystem/OSNSystem/obj/x86/Debug/OSNSystem.csproj.GenerateResource.cache
- OSNSystem/OSNSystem/OSNSystem/obj/x86/Debug/OSNSystem.exe
- OSNSystem/OSNSystem/OSNSystem/obj/x86/Debug/OSNSystem.instr.pdb
- OSNSystem/OSNSystem/OSNSystem/obj/x86/Debug/OSNSystem.Main.resources
- OSNSystem/OSNSystem/OSNSystem/obj/x86/Debug/OSNSystem.pdb
- OSNSystem/OSNSystem/OSNSystem/obj/x86/Debug/OSNSystem.Properties.Resources.resources
- OSNSystem/OSNSystem/OSNSystem/obj/x86/Debug/OSNSystem.SensorConfig.resources
- OSNSystem/OSNSystem/OSNSystem/obj/x86/Debug/OSNSystem.SetCamera.resources
- OSNSystem/OSNSystem/OSNSystem/obj/x86/Debug/OSNSystem.SetChlTur.resources
- OSNSystem/OSNSystem/OSNSystem/obj/x86/Debug/OSNSystem.SetCTD.resources
- OSNSystem/OSNSystem/OSNSystem/obj/x86/Debug/OSNSystem.SetDO.resources
- OSNSystem/OSNSystem/OSNSystem/obj/x86/Debug/OSNSystem.SetPicScope.resources
- OSNSystem/OSNSystem/OSNSystem/obj/x86/Debug/OSNSystem.ShowCTDFigure.resources
- OSNSystem/OSNSystem/OSNSystem/obj/x86/Debug/TemporaryGeneratedFile_036C0B5B-1481-4323-8D20-8F5ADCB23D92.cs
- OSNSystem/OSNSystem/OSNSystem/obj/x86/Debug/TemporaryGeneratedFile_5937a670-0e60-4077-877b-f7221da3dda1.cs
- OSNSystem/OSNSystem/OSNSystem/obj/x86/Debug/TemporaryGeneratedFile_E7A71F73-0F8D-4B9B-B56E-8E70B10BC5D3.cs
- OSNSystem/OSNSystem/OSNSystem/obj/x86/Debug/TempPE/
- OSNSystem/OSNSystem/OSNSystem/obj/x86/Debug/TempPE/Properties.Resources.Designer.cs.dll
- OSNSystem/OSNSystem/OSNSystem/obj/x86/Debug/╝α┐╪.csproj.FileListAbsolute.txt
- OSNSystem/OSNSystem/OSNSystem/obj/x86/Debug/╝α┐╪.csproj.GenerateResource.Cache
- OSNSystem/OSNSystem/OSNSystem/OSNSystem.csproj
- OSNSystem/OSNSystem/OSNSystem/platformStatus.cs
- OSNSystem/OSNSystem/OSNSystem/Program.cs
- OSNSystem/OSNSystem/OSNSystem/Properties/
- OSNSystem/OSNSystem/OSNSystem/Properties/app.manifest
- OSNSystem/OSNSystem/OSNSystem/Properties/AssemblyInfo.cs
- OSNSystem/OSNSystem/OSNSystem/Properties/Resources.Designer.cs
- OSNSystem/OSNSystem/OSNSystem/Properties/Resources.resx
- OSNSystem/OSNSystem/OSNSystem/Properties/Settings.Designer.cs
- OSNSystem/OSNSystem/OSNSystem/Properties/Settings.settings
- OSNSystem/OSNSystem/OSNSystem/SendMessageClass.cs
- OSNSystem/OSNSystem/OSNSystem/SensorConfig.cs
- OSNSystem/OSNSystem/OSNSystem/SensorConfig.Designer.cs
- OSNSystem/OSNSystem/OSNSystem/SensorConfig.resx
- OSNSystem/OSNSystem/OSNSystem/SetCamera.cs
- OSNSystem/OSNSystem/OSNSystem/SetCamera.Designer.cs
- OSNSystem/OSNSystem/OSNSystem/SetCamera.resx
- OSNSystem/OSNSystem/OSNSystem/SetCTD.cs
- OSNSystem/OSNSystem/OSNSystem/SetCTD.Designer.cs
- OSNSystem/OSNSystem/OSNSystem/SetCTD.resx
- OSNSystem/OSNSystem/OSNSystem/SetDO.cs
- OSNSystem/OSNSystem/OSNSystem/SetDO.Designer.cs
- OSNSystem/OSNSystem/OSNSystem/SetDO.resx
- OSNSystem/OSNSystem/OSNSystem/SetMulti.cs
- OSNSystem/OSNSystem/OSNSystem/SetMulti.Designer.cs
- OSNSystem/OSNSystem/OSNSystem/SetMulti.resx
- OSNSystem/OSNSystem/OSNSystem/SetPicScope.cs
- OSNSystem/OSNSystem/OSNSystem/SetPicScope.Designer.cs
- OSNSystem/OSNSystem/OSNSystem/SetPicScope.resx
- OSNSystem/OSNSystem/OSNSystem/ShowCTDFigure.cs
- OSNSystem/OSNSystem/OSNSystem/ShowCTDFigure.Designer.cs
- OSNSystem/OSNSystem/OSNSystem/ShowCTDFigure.resx
- OSNSystem/OSNSystem/OSNSystem/SqlHelper.cs
- OSNSystem/OSNSystem/OSNSystem/TeeChart.dll
- OSNSystem/OSNSystem/OSNSystem/TeeChart.xml
- OSNSystem/OSNSystem/OSNSystem/ThreadProcessBeidou.cs
- OSNSystem/OSNSystem/OSNSystem/ThreadProcessHighPower.cs
- OSNSystem/OSNSystem/~$STM32-╡Ñ╞1⁄4╗·╨¡╥Θ2017-09-04.xlsx
- OSNSystem/OSNSystem/~$STM32-╡Ñ╞1⁄4╗·╨¡╥Θ2018-01-29.xlsx
- OSNSystem/OSNSystem/~$╩2╛▌┐Γ╔Φ╝╞.docx
- OSNSystem/OSNSystem/~$╩2╛▌▓╔╝»╞≈╥╘╠1⁄2═°╙a╙├▓π═¿╤╢╨¡╥Θ0719.xlsx
- OSNSystem/OSNSystem/~WRL2874.tmp
- Read me.pdf
