# Supplementary material
Source: MDPI journal article supplement (https://www.mdpi.com/2077-1312/10/8/1051)
Supplement: s1 [file s1]

**Developed hardware environment:** Intel Core i5 processor (main frequency 3.2 GHz), 8G installed memory, Lenovo desktop with win7 ultimate 64 bit operating system.

**Hardware environment of operation:** Generally, mainstream commercial computers equipped with Windows operating system can complete the operation of the software.

**The operating system for developing the software:** Win7 64 bit ultimate.

Software development environment / development tools: Microsoft visual studio 2019

**Platform / operating system of the software:** Mainstream windows operating system.

**Software operation support environment / support software:** MySQL database, Net framework 4.0 architecture.
