# Supplementary material
Source: MDPI journal article supplement (https://www.mdpi.com/2077-1312/10/8/1051)
Supplement: s1 [file s1 › DMS/DMS.sln]

Microsoft Visual Studio Solution File, Format Version 11.00
# Visual Studio 2010
Project("{FAE04EC0-301F-11D3-BF4B-00C04F79EFBC}") = "DMS", "DMS\DMS.csproj", "{D0F5AC71-E756-40A2-AC74-9AFE37BFD7BA}"
EndProject
Global
	GlobalSection(SolutionConfigurationPlatforms) = preSolution
		Debug|x86 = Debug|x86
		Release|x86 = Release|x86
	EndGlobalSection
	GlobalSection(ProjectConfigurationPlatforms) = postSolution
		{D0F5AC71-E756-40A2-AC74-9AFE37BFD7BA}.Debug|x86.ActiveCfg = Debug|x86
		{D0F5AC71-E756-40A2-AC74-9AFE37BFD7BA}.Debug|x86.Build.0 = Debug|x86
		{D0F5AC71-E756-40A2-AC74-9AFE37BFD7BA}.Release|x86.ActiveCfg = Release|x86
		{D0F5AC71-E756-40A2-AC74-9AFE37BFD7BA}.Release|x86.Build.0 = Release|x86
	EndGlobalSection
	GlobalSection(SolutionProperties) = preSolution
		HideSolutionNode = FALSE
	EndGlobalSection
EndGlobal
