# Supplementary material
Source: MDPI journal article supplement (https://www.mdpi.com/2077-1312/10/8/1051)
Supplement: s1 [file s1 › DMS/DMS/bin/Debug/LocalIPandPort.xml]

<?xml version="1.0" standalone="yes"?>
<NewDataSet>
  <Table1>
    <srvIP>192.168.90.82</srvIP>
    <AJunctionIP>192.168.90.2</AJunctionIP>
    <BJunctionIP>192.168.90.82</BJunctionIP>
    <srvDataCollectPort>8000</srvDataCollectPort>
    <srvJunctionBoxAPort>8082</srvJunctionBoxAPort>
    <srvJunctionBoxBPort>8087</srvJunctionBoxBPort>   
  </Table1>
</NewDataSet>
