# Supplementary material
Source: MDPI journal article supplement (https://www.mdpi.com/2077-1312/10/8/1051)
Supplement: s1 [file s1 › DMS/DMS/bin/Debug/LogFile.txt]

Log Entry : 10:39:39 2021年6月30日 星期三 

解析传感器数据异常！输入字符串的格式不正确。

------------------------------------


Log Entry : 10:39:49 2021年6月30日 星期三 

解析传感器数据异常！输入字符串的格式不正确。

------------------------------------


Log Entry : 10:39:56 2021年6月30日 星期三 

解析传感器数据异常！输入字符串的格式不正确。

------------------------------------


Log Entry : 10:40:41 2021年6月30日 星期三 

解析传感器数据异常！输入字符串的格式不正确。

------------------------------------


Log Entry : 10:40:43 2021年6月30日 星期三 

解析传感器数据异常！输入字符串的格式不正确。

------------------------------------


Log Entry : 10:40:44 2021年6月30日 星期三 

解析传感器数据异常！输入字符串的格式不正确。

------------------------------------


Log Entry : 10:40:45 2021年6月30日 星期三 

解析传感器数据异常！输入字符串的格式不正确。

------------------------------------


Log Entry : 10:41:08 2021年6月30日 星期三 

解析传感器数据异常！输入字符串的格式不正确。

------------------------------------


Log Entry : 10:41:19 2021年6月30日 星期三 

解析传感器数据异常！输入字符串的格式不正确。

------------------------------------


Log Entry : 10:46:33 2021年6月30日 星期三 

解析传感器数据异常！输入字符串的格式不正确。

------------------------------------


Log Entry : 10:47:21 2021年6月30日 星期三 

解析传感器数据异常！输入字符串的格式不正确。

------------------------------------


Log Entry : 10:47:22 2021年6月30日 星期三 

解析传感器数据异常！输入字符串的格式不正确。

------------------------------------


Log Entry : 10:47:23 2021年6月30日 星期三 

解析传感器数据异常！输入字符串的格式不正确。

------------------------------------


Log Entry : 14:58:52 2022年7月22日 星期五 

建立本地socket侦听对象出现异常！在其上下文中，该请求的地址无效。

------------------------------------
