# Supplementary material
Source: MDPI journal article supplement (https://www.mdpi.com/2077-1312/10/8/1051)
Supplement: s1 [file s1 › DMS/DMS/CRC32.cs]

using System;
using System.Collections.Generic;
using System.Linq;
using System.Text;

namespace DMS
{
    class CRC32
    {
        /// <summary>
        /// 求解对应的CRC32校验的计算值
        /// </summary>
        /// <param name="data"></param>
        /// <returns></returns>
        public static UInt32 GetCrc32(Byte[] data)
        {
            UInt32 crcValue = 0xFFFFFFFF;
            if (data != null)
            {
                foreach (Byte b in data)
                {
                    crcValue = (crcValue >> 8) ^ CRC32TABLE[(crcValue ^ b) & 0xFF];
                }
            }

            return ~crcValue;
        }
        /// <summary>
        /// CRC32校验表格
        /// </summary>
        private static readonly UInt32[] CRC32TABLE =  
        {  
            0x00000000, 0x77073096, 0xEE0E612C, 0x990951BA, 0x076DC419, 0x706AF48F, 0xE963A535, 0x9E6495A3,  
            0x0EDB8832, 0x79DCB8A4, 0xE0D5E91E, 0x97D2D988, 0x09B64C2B, 0x7EB17CBD, 0xE7B82D07, 0x90BF1D91,  
            0x1DB71064, 0x6AB020F2, 0xF3B97148, 0x84BE41DE, 0x1ADAD47D, 0x6DDDE4EB, 0xF4D4B551, 0x83D385C7,  
            0x136C9856, 0x646BA8C0, 0xFD62F97A, 0x8A65C9EC, 0x14015C4F, 0x63066CD9, 0xFA0F3D63, 0x8D080DF5,  
            0x3B6E20C8, 0x4C69105E, 0xD56041E4, 0xA2677172, 0x3C03E4D1, 0x4B04D447, 0xD20D85FD, 0xA50AB56B,  
            0x35B5A8FA, 0x42B2986C, 0xDBBBC9D6, 0xACBCF940, 0x32D86CE3, 0x45DF5C75, 0xDCD60DCF, 0xABD13D59,  
            0x26D930AC, 0x51DE003A, 0xC8D75180, 0xBFD06116, 0x21B4F4B5, 0x56B3C423, 0xCFBA9599, 0xB8BDA50F,  
            0x2802B89E, 0x5F058808, 0xC60CD9B2, 0xB10BE924, 0x2F6F7C87, 0x58684C11, 0xC1611DAB, 0xB6662D3D,  
            0x76DC4190, 0x01DB7106, 0x98D220BC, 0xEFD5102A, 0x71B18589, 0x06B6B51F, 0x9FBFE4A5, 0xE8B8D433,  
            0x7807C9A2, 0x0F00F934, 0x9609A88E, 0xE10E9818, 0x7F6A0DBB, 0x086D3D2D, 0x91646C97, 0xE6635C01,  
            0x6B6B51F4, 0x1C6C6162, 0x856530D8, 0xF262004E, 0x6C0695ED, 0x1B01A57B, 0x8208F4C1, 0xF50FC457,  
            0x65B0D9C6, 0x12B7E950, 0x8BBEB8EA, 0xFCB9887C, 0x62DD1DDF, 0x15DA2D49, 0x8CD37CF3, 0xFBD44C65,  
            0x4DB26158, 0x3AB551CE, 0xA3BC0074, 0xD4BB30E2, 0x4ADFA541, 0x3DD895D7, 0xA4D1C46D, 0xD3D6F4FB,  
            0x4369E96A, 0x346ED9FC, 0xAD678846, 0xDA60B8D0, 0x44042D73, 0x33031DE5, 0xAA0A4C5F, 0xDD0D7CC9,  
            0x5005713C, 0x270241AA, 0xBE0B1010, 0xC90C2086, 0x5768B525, 0x206F85B3, 0xB966D409, 0xCE61E49F,  
            0x5EDEF90E, 0x29D9C998, 0xB0D09822, 0xC7D7A8B4, 0x59B33D17, 0x2EB40D81, 0xB7BD5C3B, 0xC0BA6CAD,  
            0xEDB88320, 0x9ABFB3B6, 0x03B6E20C, 0x74B1D29A, 0xEAD54739, 0x9DD277AF, 0x04DB2615, 0x73DC1683,  
            0xE3630B12, 0x94643B84, 0x0D6D6A3E, 0x7A6A5AA8, 0xE40ECF0B, 0x9309FF9D, 0x0A00AE27, 0x7D079EB1,  
            0xF00F9344, 0x8708A3D2, 0x1E01F268, 0x6906C2FE, 0xF762575D, 0x806567CB, 0x196C3671, 0x6E6B06E7,  
            0xFED41B76, 0x89D32BE0, 0x10DA7A5A, 0x67DD4ACC, 0xF9B9DF6F, 0x8EBEEFF9, 0x17B7BE43, 0x60B08ED5,  
            0xD6D6A3E8, 0xA1D1937E, 0x38D8C2C4, 0x4FDFF252, 0xD1BB67F1, 0xA6BC5767, 0x3FB506DD, 0x48B2364B,  
            0xD80D2BDA, 0xAF0A1B4C, 0x36034AF6, 0x41047A60, 0xDF60EFC3, 0xA867DF55, 0x316E8EEF, 0x4669BE79,  
            0xCB61B38C, 0xBC66831A, 0x256FD2A0, 0x5268E236, 0xCC0C7795, 0xBB0B4703, 0x220216B9, 0x5505262F,  
            0xC5BA3BBE, 0xB2BD0B28, 0x2BB45A92, 0x5CB36A04, 0xC2D7FFA7, 0xB5D0CF31, 0x2CD99E8B, 0x5BDEAE1D,  
            0x9B64C2B0, 0xEC63F226, 0x756AA39C, 0x026D930A, 0x9C0906A9, 0xEB0E363F, 0x72076785, 0x05005713,  
            0x95BF4A82, 0xE2B87A14, 0x7BB12BAE, 0x0CB61B38, 0x92D28E9B, 0xE5D5BE0D, 0x7CDCEFB7, 0x0BDBDF21,  
            0x86D3D2D4, 0xF1D4E242, 0x68DDB3F8, 0x1FDA836E, 0x81BE16CD, 0xF6B9265B, 0x6FB077E1, 0x18B74777,  
            0x88085AE6, 0xFF0F6A70, 0x66063BCA, 0x11010B5C, 0x8F659EFF, 0xF862AE69, 0x616BFFD3, 0x166CCF45,  
            0xA00AE278, 0xD70DD2EE, 0x4E048354, 0x3903B3C2, 0xA7672661, 0xD06016F7, 0x4969474D, 0x3E6E77DB,  
            0xAED16A4A, 0xD9D65ADC, 0x40DF0B66, 0x37D83BF0, 0xA9BCAE53, 0xDEBB9EC5, 0x47B2CF7F, 0x30B5FFE9,  
            0xBDBDF21C, 0xCABAC28A, 0x53B39330, 0x24B4A3A6, 0xBAD03605, 0xCDD70693, 0x54DE5729, 0x23D967BF,  
            0xB3667A2E, 0xC4614AB8, 0x5D681B02, 0x2A6F2B94, 0xB40BBE37, 0xC30C8EA1, 0x5A05DF1B, 0x2D02EF8D  
        };


        /*
         * 以下为新增的鑫宇航电源MODBUS CRC16校验计算
         */

        #region CRC16
        public static byte[] CRC16(byte[] data)
        {
            int len = data.Length;
            if (len > 0)
            {
                ushort crc = 0xFFFF;

                for (int i = 0; i < len; i++)
                {
                    crc = (ushort)(crc ^ (data[i]));
                    for (int j = 0; j < 8; j++)
                    {
                        crc = (crc & 1) != 0 ? (ushort)((crc >> 1) ^ 0xA001) : (ushort)(crc >> 1);
                    }
                }
                byte hi = (byte)((crc & 0xFF00) >> 8); //高位置
                byte lo = (byte)(crc & 0x00FF); //低位置

                return new byte[] { hi, lo };
            }
            return new byte[] { 0, 0 };
        }
        #endregion

        #region ToCRC16
        public static string ToCRC16(string content)
        {
            return ToCRC16(content, Encoding.UTF8);
        }

        public static string ToCRC16(string content, bool isReverse)
        {
            return ToCRC16(content, Encoding.UTF8, isReverse);
        }

        public static string ToCRC16(string content, Encoding encoding)
        {
            return ByteToString(CRC16(encoding.GetBytes(content)), true);
        }

        public static string ToCRC16(string content, Encoding encoding, bool isReverse)
        {
            return ByteToString(CRC16(encoding.GetBytes(content)), isReverse);
        }

        public static string ToCRC16(byte[] data)
        {
            return ByteToString(CRC16(data), true);
        }

        public static string ToCRC16(byte[] data, bool isReverse)
        {
            return ByteToString(CRC16(data), isReverse);
        }
        #endregion

        #region ToModbusCRC16
        public static string ToModbusCRC16(string s)
        {
            return ToModbusCRC16(s, true);
        }

        public static string ToModbusCRC16(string s, bool isReverse)
        {
            return ByteToString(CRC16(StringToHexByte(s)), isReverse);
        }

        public static string ToModbusCRC16(byte[] data)
        {
            return ToModbusCRC16(data, true);
        }

        public static string ToModbusCRC16(byte[] data, bool isReverse)
        {
            return ByteToString(CRC16(data), isReverse);
        }
        #endregion

        #region ByteToString
        public static string ByteToString(byte[] arr, bool isReverse)
        {
            try
            {
                byte hi = arr[0], lo = arr[1];
                return Convert.ToString(isReverse ? hi + lo * 0x100 : hi * 0x100 + lo, 16).ToUpper().PadLeft(4, '0');
            }
            catch (Exception ex) { throw (ex); }
        }

        public static string ByteToString(byte[] arr)
        {
            try
            {
                return ByteToString(arr, true);
            }
            catch (Exception ex) { throw (ex); }
        }
        #endregion

        #region StringToHexString
        public static string StringToHexString(string str)
        {
            StringBuilder s = new StringBuilder();
            foreach (short c in str.ToCharArray())
            {
                s.Append(c.ToString("X4"));
            }
            return s.ToString();
        }
        #endregion

        #region StringToHexByte
        private static string ConvertChinese(string str)
        {
            StringBuilder s = new StringBuilder();
            foreach (short c in str.ToCharArray())
            {
                if (c <= 0 || c >= 127)
                {
                    s.Append(c.ToString("X4"));
                }
                else
                {
                    s.Append((char)c);
                }
            }
            return s.ToString();
        }

        private static string FilterChinese(string str)
        {
            StringBuilder s = new StringBuilder();
            foreach (short c in str.ToCharArray())
            {
                if (c > 0 && c < 127)
                {
                    s.Append((char)c);
                }
            }
            return s.ToString();
        }

        /// <summary>
        /// 字符串转16进制字符数组
        /// </summary>
        /// <param name="hex"></param>
        /// <returns></returns>
        public static byte[] StringToHexByte(string str)
        {
            return StringToHexByte(str, false);
        }

        /// <summary>
        /// 字符串转16进制字符数组
        /// </summary>
        /// <param name="str"></param>
        /// <param name="isFilterChinese">是否过滤掉中文字符</param>
        /// <returns></returns>
        public static byte[] StringToHexByte(string str, bool isFilterChinese)
        {
            string hex = isFilterChinese ? FilterChinese(str) : ConvertChinese(str);

            //清除所有空格
            hex = hex.Replace(" ", "");
            //若字符个数为奇数，补一个0
            hex += hex.Length % 2 != 0 ? "0" : "";

            byte[] result = new byte[hex.Length / 2];
            for (int i = 0, c = result.Length; i < c; i++)
            {
                result[i] = Convert.ToByte(hex.Substring(i * 2, 2), 16);
            }
            return result;
        }
        #endregion
    }
}
