# Supplementary material
Source: MDPI journal article supplement (https://www.mdpi.com/2077-1312/10/8/1051)
Supplement: s1 [file s1 › DMS/DMS/DCDataInfo.Designer.cs]

namespace DMS
{
    partial class DCDataInfo
    {
        /// <summary>
        /// Required designer variable.
        /// </summary>
        private System.ComponentModel.IContainer components = null;

        /// <summary>
        /// Clean up any resources being used.
        /// </summary>
        /// <param name="disposing">true if managed resources should be disposed; otherwise, false.</param>
        protected override void Dispose(bool disposing)
        {
            if (disposing && (components != null))
            {
                components.Dispose();
            }
            base.Dispose(disposing);
        }

        #region Windows Form Designer generated code

        /// <summary>
        /// Required method for Designer support - do not modify
        /// the contents of this method with the code editor.
        /// </summary>
        private void InitializeComponent()
        {
            System.Windows.Forms.DataGridViewCellStyle dataGridViewCellStyle1 = new System.Windows.Forms.DataGridViewCellStyle();
            System.Windows.Forms.DataGridViewCellStyle dataGridViewCellStyle2 = new System.Windows.Forms.DataGridViewCellStyle();
            System.Windows.Forms.DataGridViewCellStyle dataGridViewCellStyle3 = new System.Windows.Forms.DataGridViewCellStyle();
            System.Windows.Forms.DataGridViewCellStyle dataGridViewCellStyle4 = new System.Windows.Forms.DataGridViewCellStyle();
            System.Windows.Forms.DataGridViewCellStyle dataGridViewCellStyle5 = new System.Windows.Forms.DataGridViewCellStyle();
            this.tableLayoutPanel1 = new System.Windows.Forms.TableLayoutPanel();
            this.groupBox2 = new System.Windows.Forms.GroupBox();
            this.panel1 = new System.Windows.Forms.Panel();
            this.groupBox1 = new System.Windows.Forms.GroupBox();
            this.panel2 = new System.Windows.Forms.Panel();
            this.label75 = new System.Windows.Forms.Label();
            this.label77 = new System.Windows.Forms.Label();
            this.label78 = new System.Windows.Forms.Label();
            this.label79 = new System.Windows.Forms.Label();
            this.label80 = new System.Windows.Forms.Label();
            this.label81 = new System.Windows.Forms.Label();
            this.label82 = new System.Windows.Forms.Label();
            this.label83 = new System.Windows.Forms.Label();
            this.label84 = new System.Windows.Forms.Label();
            this.label85 = new System.Windows.Forms.Label();
            this.label86 = new System.Windows.Forms.Label();
            this.label87 = new System.Windows.Forms.Label();
            this.label88 = new System.Windows.Forms.Label();
            this.label89 = new System.Windows.Forms.Label();
            this.label90 = new System.Windows.Forms.Label();
            this.sensorFiveTime = new System.Windows.Forms.TextBox();
            this.sensorFourTime = new System.Windows.Forms.TextBox();
            this.sensorThreeTime = new System.Windows.Forms.TextBox();
            this.sensorTwoTime = new System.Windows.Forms.TextBox();
            this.sensorOneTime = new System.Windows.Forms.TextBox();
            this.sensorFivePower = new System.Windows.Forms.TextBox();
            this.sensorThreePower = new System.Windows.Forms.TextBox();
            this.sensorFourPower = new System.Windows.Forms.TextBox();
            this.sensorTwoPower = new System.Windows.Forms.TextBox();
            this.sensorOnePower = new System.Windows.Forms.TextBox();
            this.sensorFiveCur = new System.Windows.Forms.TextBox();
            this.sensorThreeCur = new System.Windows.Forms.TextBox();
            this.sensorFourCur = new System.Windows.Forms.TextBox();
            this.sensorTwoCur = new System.Windows.Forms.TextBox();
            this.sensorOneCur = new System.Windows.Forms.TextBox();
            this.sensorFiveVol = new System.Windows.Forms.TextBox();
            this.sensorThreeVol = new System.Windows.Forms.TextBox();
            this.label91 = new System.Windows.Forms.Label();
            this.sensorFourVol = new System.Windows.Forms.TextBox();
            this.label92 = new System.Windows.Forms.Label();
            this.label93 = new System.Windows.Forms.Label();
            this.sensorTwoVol = new System.Windows.Forms.TextBox();
            this.label94 = new System.Windows.Forms.Label();
            this.sensorOneVol = new System.Windows.Forms.TextBox();
            this.label95 = new System.Windows.Forms.Label();
            this.dataGridView1 = new System.Windows.Forms.DataGridView();
            this.tableLayoutPanel1.SuspendLayout();
            this.groupBox2.SuspendLayout();
            this.panel1.SuspendLayout();
            this.groupBox1.SuspendLayout();
            this.panel2.SuspendLayout();
            ((System.ComponentModel.ISupportInitialize)(this.dataGridView1)).BeginInit();
            this.SuspendLayout();
            // 
            // tableLayoutPanel1
            // 
            this.tableLayoutPanel1.ColumnCount = 1;
            this.tableLayoutPanel1.ColumnStyles.Add(new System.Windows.Forms.ColumnStyle(System.Windows.Forms.SizeType.Percent, 50F));
            this.tableLayoutPanel1.Controls.Add(this.groupBox2, 0, 1);
            this.tableLayoutPanel1.Controls.Add(this.groupBox1, 0, 0);
            this.tableLayoutPanel1.Dock = System.Windows.Forms.DockStyle.Fill;
            this.tableLayoutPanel1.Location = new System.Drawing.Point(0, 0);
            this.tableLayoutPanel1.Name = "tableLayoutPanel1";
            this.tableLayoutPanel1.RowCount = 2;
            this.tableLayoutPanel1.RowStyles.Add(new System.Windows.Forms.RowStyle(System.Windows.Forms.SizeType.Percent, 46.2F));
            this.tableLayoutPanel1.RowStyles.Add(new System.Windows.Forms.RowStyle(System.Windows.Forms.SizeType.Percent, 53.8F));
            this.tableLayoutPanel1.RowStyles.Add(new System.Windows.Forms.RowStyle(System.Windows.Forms.SizeType.Absolute, 20F));
            this.tableLayoutPanel1.Size = new System.Drawing.Size(727, 500);
            this.tableLayoutPanel1.TabIndex = 0;
            // 
            // groupBox2
            // 
            this.groupBox2.Controls.Add(this.panel1);
            this.groupBox2.Dock = System.Windows.Forms.DockStyle.Fill;
            this.groupBox2.Font = new System.Drawing.Font("宋体", 15F, System.Drawing.FontStyle.Bold, System.Drawing.GraphicsUnit.Point, ((byte)(134)));
            this.groupBox2.ForeColor = System.Drawing.Color.FromArgb(((int)(((byte)(0)))), ((int)(((byte)(0)))), ((int)(((byte)(192)))));
            this.groupBox2.Location = new System.Drawing.Point(3, 234);
            this.groupBox2.Name = "groupBox2";
            this.groupBox2.Size = new System.Drawing.Size(721, 263);
            this.groupBox2.TabIndex = 40;
            this.groupBox2.TabStop = false;
            this.groupBox2.Text = "传感器采集信息";
            // 
            // panel1
            // 
            this.panel1.Controls.Add(this.dataGridView1);
            this.panel1.Dock = System.Windows.Forms.DockStyle.Fill;
            this.panel1.Location = new System.Drawing.Point(3, 26);
            this.panel1.Name = "panel1";
            this.panel1.Size = new System.Drawing.Size(715, 234);
            this.panel1.TabIndex = 0;
            // 
            // groupBox1
            // 
            this.groupBox1.Controls.Add(this.panel2);
            this.groupBox1.Dock = System.Windows.Forms.DockStyle.Fill;
            this.groupBox1.Font = new System.Drawing.Font("宋体", 15F, System.Drawing.FontStyle.Bold);
            this.groupBox1.ForeColor = System.Drawing.Color.FromArgb(((int)(((byte)(0)))), ((int)(((byte)(0)))), ((int)(((byte)(192)))));
            this.groupBox1.Location = new System.Drawing.Point(3, 3);
            this.groupBox1.Name = "groupBox1";
            this.groupBox1.Size = new System.Drawing.Size(721, 225);
            this.groupBox1.TabIndex = 41;
            this.groupBox1.TabStop = false;
            this.groupBox1.Text = "数据采集器电能输出通道信息";
            // 
            // panel2
            // 
            this.panel2.Controls.Add(this.label75);
            this.panel2.Controls.Add(this.label77);
            this.panel2.Controls.Add(this.label78);
            this.panel2.Controls.Add(this.label79);
            this.panel2.Controls.Add(this.label80);
            this.panel2.Controls.Add(this.label81);
            this.panel2.Controls.Add(this.label82);
            this.panel2.Controls.Add(this.label83);
            this.panel2.Controls.Add(this.label84);
            this.panel2.Controls.Add(this.label85);
            this.panel2.Controls.Add(this.label86);
            this.panel2.Controls.Add(this.label87);
            this.panel2.Controls.Add(this.label88);
            this.panel2.Controls.Add(this.label89);
            this.panel2.Controls.Add(this.label90);
            this.panel2.Controls.Add(this.sensorFiveTime);
            this.panel2.Controls.Add(this.sensorFourTime);
            this.panel2.Controls.Add(this.sensorThreeTime);
            this.panel2.Controls.Add(this.sensorTwoTime);
            this.panel2.Controls.Add(this.sensorOneTime);
            this.panel2.Controls.Add(this.sensorFivePower);
            this.panel2.Controls.Add(this.sensorThreePower);
            this.panel2.Controls.Add(this.sensorFourPower);
            this.panel2.Controls.Add(this.sensorTwoPower);
            this.panel2.Controls.Add(this.sensorOnePower);
            this.panel2.Controls.Add(this.sensorFiveCur);
            this.panel2.Controls.Add(this.sensorThreeCur);
            this.panel2.Controls.Add(this.sensorFourCur);
            this.panel2.Controls.Add(this.sensorTwoCur);
            this.panel2.Controls.Add(this.sensorOneCur);
            this.panel2.Controls.Add(this.sensorFiveVol);
            this.panel2.Controls.Add(this.sensorThreeVol);
            this.panel2.Controls.Add(this.label91);
            this.panel2.Controls.Add(this.sensorFourVol);
            this.panel2.Controls.Add(this.label92);
            this.panel2.Controls.Add(this.label93);
            this.panel2.Controls.Add(this.sensorTwoVol);
            this.panel2.Controls.Add(this.label94);
            this.panel2.Controls.Add(this.sensorOneVol);
            this.panel2.Controls.Add(this.label95);
            this.panel2.Dock = System.Windows.Forms.DockStyle.Fill;
            this.panel2.Location = new System.Drawing.Point(3, 26);
            this.panel2.Name = "panel2";
            this.panel2.Size = new System.Drawing.Size(715, 196);
            this.panel2.TabIndex = 0;
            // 
            // label75
            // 
            this.label75.AutoSize = true;
            this.label75.Font = new System.Drawing.Font("Times New Roman", 12F, ((System.Drawing.FontStyle)((System.Drawing.FontStyle.Bold | System.Drawing.FontStyle.Italic))), System.Drawing.GraphicsUnit.Point, ((byte)(0)));
            this.label75.ForeColor = System.Drawing.Color.Black;
            this.label75.Location = new System.Drawing.Point(285, 105);
            this.label75.Name = "label75";
            this.label75.Size = new System.Drawing.Size(23, 19);
            this.label75.TabIndex = 83;
            this.label75.Text = "W";
            // 
            // label77
            // 
            this.label77.AutoSize = true;
            this.label77.Font = new System.Drawing.Font("Times New Roman", 12F, ((System.Drawing.FontStyle)((System.Drawing.FontStyle.Bold | System.Drawing.FontStyle.Italic))), System.Drawing.GraphicsUnit.Point, ((byte)(0)));
            this.label77.ForeColor = System.Drawing.Color.Black;
            this.label77.Location = new System.Drawing.Point(285, 82);
            this.label77.Name = "label77";
            this.label77.Size = new System.Drawing.Size(23, 19);
            this.label77.TabIndex = 82;
            this.label77.Text = "W";
            // 
            // label78
            // 
            this.label78.AutoSize = true;
            this.label78.Font = new System.Drawing.Font("Times New Roman", 12F, ((System.Drawing.FontStyle)((System.Drawing.FontStyle.Bold | System.Drawing.FontStyle.Italic))), System.Drawing.GraphicsUnit.Point, ((byte)(0)));
            this.label78.ForeColor = System.Drawing.Color.Black;
            this.label78.Location = new System.Drawing.Point(285, 59);
            this.label78.Name = "label78";
            this.label78.Size = new System.Drawing.Size(23, 19);
            this.label78.TabIndex = 81;
            this.label78.Text = "W";
            // 
            // label79
            // 
            this.label79.AutoSize = true;
            this.label79.Font = new System.Drawing.Font("Times New Roman", 12F, ((System.Drawing.FontStyle)((System.Drawing.FontStyle.Bold | System.Drawing.FontStyle.Italic))), System.Drawing.GraphicsUnit.Point, ((byte)(0)));
            this.label79.ForeColor = System.Drawing.Color.Black;
            this.label79.Location = new System.Drawing.Point(285, 36);
            this.label79.Name = "label79";
            this.label79.Size = new System.Drawing.Size(23, 19);
            this.label79.TabIndex = 80;
            this.label79.Text = "W";
            // 
            // label80
            // 
            this.label80.AutoSize = true;
            this.label80.Font = new System.Drawing.Font("Times New Roman", 12F, ((System.Drawing.FontStyle)((System.Drawing.FontStyle.Bold | System.Drawing.FontStyle.Italic))), System.Drawing.GraphicsUnit.Point, ((byte)(0)));
            this.label80.ForeColor = System.Drawing.Color.Black;
            this.label80.Location = new System.Drawing.Point(285, 13);
            this.label80.Name = "label80";
            this.label80.Size = new System.Drawing.Size(23, 19);
            this.label80.TabIndex = 79;
            this.label80.Text = "W";
            // 
            // label81
            // 
            this.label81.AutoSize = true;
            this.label81.Font = new System.Drawing.Font("Times New Roman", 12F, ((System.Drawing.FontStyle)((System.Drawing.FontStyle.Bold | System.Drawing.FontStyle.Italic))), System.Drawing.GraphicsUnit.Point, ((byte)(0)));
            this.label81.ForeColor = System.Drawing.Color.Black;
            this.label81.Location = new System.Drawing.Point(191, 106);
            this.label81.Name = "label81";
            this.label81.Size = new System.Drawing.Size(20, 19);
            this.label81.TabIndex = 78;
            this.label81.Text = "A";
            // 
            // label82
            // 
            this.label82.AutoSize = true;
            this.label82.Font = new System.Drawing.Font("Times New Roman", 12F, ((System.Drawing.FontStyle)((System.Drawing.FontStyle.Bold | System.Drawing.FontStyle.Italic))), System.Drawing.GraphicsUnit.Point, ((byte)(0)));
            this.label82.ForeColor = System.Drawing.Color.Black;
            this.label82.Location = new System.Drawing.Point(191, 83);
            this.label82.Name = "label82";
            this.label82.Size = new System.Drawing.Size(20, 19);
            this.label82.TabIndex = 77;
            this.label82.Text = "A";
            // 
            // label83
            // 
            this.label83.AutoSize = true;
            this.label83.Font = new System.Drawing.Font("Times New Roman", 12F, ((System.Drawing.FontStyle)((System.Drawing.FontStyle.Bold | System.Drawing.FontStyle.Italic))), System.Drawing.GraphicsUnit.Point, ((byte)(0)));
            this.label83.ForeColor = System.Drawing.Color.Black;
            this.label83.Location = new System.Drawing.Point(191, 60);
            this.label83.Name = "label83";
            this.label83.Size = new System.Drawing.Size(20, 19);
            this.label83.TabIndex = 76;
            this.label83.Text = "A";
            // 
            // label84
            // 
            this.label84.AutoSize = true;
            this.label84.Font = new System.Drawing.Font("Times New Roman", 12F, ((System.Drawing.FontStyle)((System.Drawing.FontStyle.Bold | System.Drawing.FontStyle.Italic))), System.Drawing.GraphicsUnit.Point, ((byte)(0)));
            this.label84.ForeColor = System.Drawing.Color.Black;
            this.label84.Location = new System.Drawing.Point(191, 37);
            this.label84.Name = "label84";
            this.label84.Size = new System.Drawing.Size(20, 19);
            this.label84.TabIndex = 75;
            this.label84.Text = "A";
            // 
            // label85
            // 
            this.label85.AutoSize = true;
            this.label85.Font = new System.Drawing.Font("Times New Roman", 12F, ((System.Drawing.FontStyle)((System.Drawing.FontStyle.Bold | System.Drawing.FontStyle.Italic))), System.Drawing.GraphicsUnit.Point, ((byte)(0)));
            this.label85.ForeColor = System.Drawing.Color.Black;
            this.label85.Location = new System.Drawing.Point(191, 14);
            this.label85.Name = "label85";
            this.label85.Size = new System.Drawing.Size(20, 19);
            this.label85.TabIndex = 74;
            this.label85.Text = "A";
            // 
            // label86
            // 
            this.label86.AutoSize = true;
            this.label86.Font = new System.Drawing.Font("Times New Roman", 12F, ((System.Drawing.FontStyle)((System.Drawing.FontStyle.Bold | System.Drawing.FontStyle.Italic))), System.Drawing.GraphicsUnit.Point, ((byte)(0)));
            this.label86.ForeColor = System.Drawing.Color.Black;
            this.label86.Location = new System.Drawing.Point(109, 101);
            this.label86.Name = "label86";
            this.label86.Size = new System.Drawing.Size(20, 19);
            this.label86.TabIndex = 73;
            this.label86.Text = "V";
            // 
            // label87
            // 
            this.label87.AutoSize = true;
            this.label87.Font = new System.Drawing.Font("Times New Roman", 12F, ((System.Drawing.FontStyle)((System.Drawing.FontStyle.Bold | System.Drawing.FontStyle.Italic))), System.Drawing.GraphicsUnit.Point, ((byte)(0)));
            this.label87.ForeColor = System.Drawing.Color.Black;
            this.label87.Location = new System.Drawing.Point(109, 78);
            this.label87.Name = "label87";
            this.label87.Size = new System.Drawing.Size(20, 19);
            this.label87.TabIndex = 72;
            this.label87.Text = "V";
            // 
            // label88
            // 
            this.label88.AutoSize = true;
            this.label88.Font = new System.Drawing.Font("Times New Roman", 12F, ((System.Drawing.FontStyle)((System.Drawing.FontStyle.Bold | System.Drawing.FontStyle.Italic))), System.Drawing.GraphicsUnit.Point, ((byte)(0)));
            this.label88.ForeColor = System.Drawing.Color.Black;
            this.label88.Location = new System.Drawing.Point(109, 55);
            this.label88.Name = "label88";
            this.label88.Size = new System.Drawing.Size(20, 19);
            this.label88.TabIndex = 71;
            this.label88.Text = "V";
            // 
            // label89
            // 
            this.label89.AutoSize = true;
            this.label89.Font = new System.Drawing.Font("Times New Roman", 12F, ((System.Drawing.FontStyle)((System.Drawing.FontStyle.Bold | System.Drawing.FontStyle.Italic))), System.Drawing.GraphicsUnit.Point, ((byte)(0)));
            this.label89.ForeColor = System.Drawing.Color.Black;
            this.label89.Location = new System.Drawing.Point(109, 32);
            this.label89.Name = "label89";
            this.label89.Size = new System.Drawing.Size(20, 19);
            this.label89.TabIndex = 70;
            this.label89.Text = "V";
            // 
            // label90
            // 
            this.label90.AutoSize = true;
            this.label90.Font = new System.Drawing.Font("Times New Roman", 12F, ((System.Drawing.FontStyle)((System.Drawing.FontStyle.Bold | System.Drawing.FontStyle.Italic))), System.Drawing.GraphicsUnit.Point, ((byte)(0)));
            this.label90.ForeColor = System.Drawing.Color.Black;
            this.label90.Location = new System.Drawing.Point(109, 9);
            this.label90.Name = "label90";
            this.label90.Size = new System.Drawing.Size(20, 19);
            this.label90.TabIndex = 69;
            this.label90.Text = "V";
            // 
            // sensorFiveTime
            // 
            this.sensorFiveTime.BackColor = System.Drawing.Color.White;
            this.sensorFiveTime.BorderStyle = System.Windows.Forms.BorderStyle.None;
            this.sensorFiveTime.Font = new System.Drawing.Font("宋体", 14.25F, System.Drawing.FontStyle.Regular, System.Drawing.GraphicsUnit.Point, ((byte)(134)));
            this.sensorFiveTime.ForeColor = System.Drawing.Color.Black;
            this.sensorFiveTime.Location = new System.Drawing.Point(311, 102);
            this.sensorFiveTime.Name = "sensorFiveTime";
            this.sensorFiveTime.ReadOnly = true;
            this.sensorFiveTime.Size = new System.Drawing.Size(170, 22);
            this.sensorFiveTime.TabIndex = 68;
            this.sensorFiveTime.TextAlign = System.Windows.Forms.HorizontalAlignment.Center;
            // 
            // sensorFourTime
            // 
            this.sensorFourTime.BackColor = System.Drawing.Color.White;
            this.sensorFourTime.BorderStyle = System.Windows.Forms.BorderStyle.None;
            this.sensorFourTime.Font = new System.Drawing.Font("宋体", 14.25F, System.Drawing.FontStyle.Regular, System.Drawing.GraphicsUnit.Point, ((byte)(134)));
            this.sensorFourTime.ForeColor = System.Drawing.Color.Black;
            this.sensorFourTime.Location = new System.Drawing.Point(311, 79);
            this.sensorFourTime.Name = "sensorFourTime";
            this.sensorFourTime.ReadOnly = true;
            this.sensorFourTime.Size = new System.Drawing.Size(170, 22);
            this.sensorFourTime.TabIndex = 65;
            this.sensorFourTime.TextAlign = System.Windows.Forms.HorizontalAlignment.Center;
            // 
            // sensorThreeTime
            // 
            this.sensorThreeTime.BackColor = System.Drawing.Color.White;
            this.sensorThreeTime.BorderStyle = System.Windows.Forms.BorderStyle.None;
            this.sensorThreeTime.Font = new System.Drawing.Font("宋体", 14.25F, System.Drawing.FontStyle.Regular, System.Drawing.GraphicsUnit.Point, ((byte)(134)));
            this.sensorThreeTime.ForeColor = System.Drawing.Color.Black;
            this.sensorThreeTime.Location = new System.Drawing.Point(311, 56);
            this.sensorThreeTime.Name = "sensorThreeTime";
            this.sensorThreeTime.ReadOnly = true;
            this.sensorThreeTime.Size = new System.Drawing.Size(170, 22);
            this.sensorThreeTime.TabIndex = 61;
            this.sensorThreeTime.TextAlign = System.Windows.Forms.HorizontalAlignment.Center;
            // 
            // sensorTwoTime
            // 
            this.sensorTwoTime.BackColor = System.Drawing.Color.White;
            this.sensorTwoTime.BorderStyle = System.Windows.Forms.BorderStyle.None;
            this.sensorTwoTime.Font = new System.Drawing.Font("宋体", 14.25F, System.Drawing.FontStyle.Regular, System.Drawing.GraphicsUnit.Point, ((byte)(134)));
            this.sensorTwoTime.ForeColor = System.Drawing.Color.Black;
            this.sensorTwoTime.Location = new System.Drawing.Point(311, 33);
            this.sensorTwoTime.Name = "sensorTwoTime";
            this.sensorTwoTime.ReadOnly = true;
            this.sensorTwoTime.Size = new System.Drawing.Size(170, 22);
            this.sensorTwoTime.TabIndex = 60;
            this.sensorTwoTime.TextAlign = System.Windows.Forms.HorizontalAlignment.Center;
            // 
            // sensorOneTime
            // 
            this.sensorOneTime.BackColor = System.Drawing.Color.White;
            this.sensorOneTime.BorderStyle = System.Windows.Forms.BorderStyle.None;
            this.sensorOneTime.Font = new System.Drawing.Font("宋体", 14.25F, System.Drawing.FontStyle.Regular, System.Drawing.GraphicsUnit.Point, ((byte)(134)));
            this.sensorOneTime.ForeColor = System.Drawing.Color.Black;
            this.sensorOneTime.Location = new System.Drawing.Point(311, 10);
            this.sensorOneTime.Name = "sensorOneTime";
            this.sensorOneTime.ReadOnly = true;
            this.sensorOneTime.Size = new System.Drawing.Size(170, 22);
            this.sensorOneTime.TabIndex = 59;
            this.sensorOneTime.TextAlign = System.Windows.Forms.HorizontalAlignment.Center;
            // 
            // sensorFivePower
            // 
            this.sensorFivePower.BackColor = System.Drawing.Color.White;
            this.sensorFivePower.BorderStyle = System.Windows.Forms.BorderStyle.None;
            this.sensorFivePower.Font = new System.Drawing.Font("宋体", 14.25F, System.Drawing.FontStyle.Regular, System.Drawing.GraphicsUnit.Point, ((byte)(134)));
            this.sensorFivePower.ForeColor = System.Drawing.Color.Black;
            this.sensorFivePower.Location = new System.Drawing.Point(213, 103);
            this.sensorFivePower.Name = "sensorFivePower";
            this.sensorFivePower.ReadOnly = true;
            this.sensorFivePower.Size = new System.Drawing.Size(70, 22);
            this.sensorFivePower.TabIndex = 49;
            this.sensorFivePower.TextAlign = System.Windows.Forms.HorizontalAlignment.Center;
            // 
            // sensorThreePower
            // 
            this.sensorThreePower.BackColor = System.Drawing.Color.White;
            this.sensorThreePower.BorderStyle = System.Windows.Forms.BorderStyle.None;
            this.sensorThreePower.Font = new System.Drawing.Font("宋体", 14.25F, System.Drawing.FontStyle.Regular, System.Drawing.GraphicsUnit.Point, ((byte)(134)));
            this.sensorThreePower.ForeColor = System.Drawing.Color.Black;
            this.sensorThreePower.Location = new System.Drawing.Point(213, 57);
            this.sensorThreePower.Name = "sensorThreePower";
            this.sensorThreePower.ReadOnly = true;
            this.sensorThreePower.Size = new System.Drawing.Size(70, 22);
            this.sensorThreePower.TabIndex = 48;
            this.sensorThreePower.TextAlign = System.Windows.Forms.HorizontalAlignment.Center;
            // 
            // sensorFourPower
            // 
            this.sensorFourPower.BackColor = System.Drawing.Color.White;
            this.sensorFourPower.BorderStyle = System.Windows.Forms.BorderStyle.None;
            this.sensorFourPower.Font = new System.Drawing.Font("宋体", 14.25F, System.Drawing.FontStyle.Regular, System.Drawing.GraphicsUnit.Point, ((byte)(134)));
            this.sensorFourPower.ForeColor = System.Drawing.Color.Black;
            this.sensorFourPower.Location = new System.Drawing.Point(213, 80);
            this.sensorFourPower.Name = "sensorFourPower";
            this.sensorFourPower.ReadOnly = true;
            this.sensorFourPower.Size = new System.Drawing.Size(70, 22);
            this.sensorFourPower.TabIndex = 51;
            this.sensorFourPower.TextAlign = System.Windows.Forms.HorizontalAlignment.Center;
            // 
            // sensorTwoPower
            // 
            this.sensorTwoPower.BackColor = System.Drawing.Color.White;
            this.sensorTwoPower.BorderStyle = System.Windows.Forms.BorderStyle.None;
            this.sensorTwoPower.Font = new System.Drawing.Font("宋体", 14.25F, System.Drawing.FontStyle.Regular, System.Drawing.GraphicsUnit.Point, ((byte)(134)));
            this.sensorTwoPower.ForeColor = System.Drawing.Color.Black;
            this.sensorTwoPower.Location = new System.Drawing.Point(213, 34);
            this.sensorTwoPower.Name = "sensorTwoPower";
            this.sensorTwoPower.ReadOnly = true;
            this.sensorTwoPower.Size = new System.Drawing.Size(70, 22);
            this.sensorTwoPower.TabIndex = 50;
            this.sensorTwoPower.TextAlign = System.Windows.Forms.HorizontalAlignment.Center;
            // 
            // sensorOnePower
            // 
            this.sensorOnePower.BackColor = System.Drawing.Color.White;
            this.sensorOnePower.BorderStyle = System.Windows.Forms.BorderStyle.None;
            this.sensorOnePower.Font = new System.Drawing.Font("宋体", 14.25F, System.Drawing.FontStyle.Regular, System.Drawing.GraphicsUnit.Point, ((byte)(134)));
            this.sensorOnePower.ForeColor = System.Drawing.Color.Black;
            this.sensorOnePower.Location = new System.Drawing.Point(213, 11);
            this.sensorOnePower.Name = "sensorOnePower";
            this.sensorOnePower.ReadOnly = true;
            this.sensorOnePower.Size = new System.Drawing.Size(70, 22);
            this.sensorOnePower.TabIndex = 44;
            this.sensorOnePower.TextAlign = System.Windows.Forms.HorizontalAlignment.Center;
            // 
            // sensorFiveCur
            // 
            this.sensorFiveCur.BackColor = System.Drawing.Color.White;
            this.sensorFiveCur.BorderStyle = System.Windows.Forms.BorderStyle.None;
            this.sensorFiveCur.Font = new System.Drawing.Font("宋体", 14.25F, System.Drawing.FontStyle.Regular, System.Drawing.GraphicsUnit.Point, ((byte)(134)));
            this.sensorFiveCur.ForeColor = System.Drawing.Color.Blue;
            this.sensorFiveCur.Location = new System.Drawing.Point(130, 103);
            this.sensorFiveCur.Name = "sensorFiveCur";
            this.sensorFiveCur.ReadOnly = true;
            this.sensorFiveCur.Size = new System.Drawing.Size(60, 22);
            this.sensorFiveCur.TabIndex = 45;
            this.sensorFiveCur.TextAlign = System.Windows.Forms.HorizontalAlignment.Center;
            // 
            // sensorThreeCur
            // 
            this.sensorThreeCur.BackColor = System.Drawing.Color.White;
            this.sensorThreeCur.BorderStyle = System.Windows.Forms.BorderStyle.None;
            this.sensorThreeCur.Font = new System.Drawing.Font("宋体", 14.25F, System.Drawing.FontStyle.Regular, System.Drawing.GraphicsUnit.Point, ((byte)(134)));
            this.sensorThreeCur.ForeColor = System.Drawing.Color.Blue;
            this.sensorThreeCur.Location = new System.Drawing.Point(130, 57);
            this.sensorThreeCur.Name = "sensorThreeCur";
            this.sensorThreeCur.ReadOnly = true;
            this.sensorThreeCur.Size = new System.Drawing.Size(60, 22);
            this.sensorThreeCur.TabIndex = 46;
            this.sensorThreeCur.TextAlign = System.Windows.Forms.HorizontalAlignment.Center;
            // 
            // sensorFourCur
            // 
            this.sensorFourCur.BackColor = System.Drawing.Color.White;
            this.sensorFourCur.BorderStyle = System.Windows.Forms.BorderStyle.None;
            this.sensorFourCur.Font = new System.Drawing.Font("宋体", 14.25F, System.Drawing.FontStyle.Regular, System.Drawing.GraphicsUnit.Point, ((byte)(134)));
            this.sensorFourCur.ForeColor = System.Drawing.Color.Blue;
            this.sensorFourCur.Location = new System.Drawing.Point(130, 80);
            this.sensorFourCur.Name = "sensorFourCur";
            this.sensorFourCur.ReadOnly = true;
            this.sensorFourCur.Size = new System.Drawing.Size(60, 22);
            this.sensorFourCur.TabIndex = 47;
            this.sensorFourCur.TextAlign = System.Windows.Forms.HorizontalAlignment.Center;
            // 
            // sensorTwoCur
            // 
            this.sensorTwoCur.BackColor = System.Drawing.Color.White;
            this.sensorTwoCur.BorderStyle = System.Windows.Forms.BorderStyle.None;
            this.sensorTwoCur.Font = new System.Drawing.Font("宋体", 14.25F, System.Drawing.FontStyle.Regular, System.Drawing.GraphicsUnit.Point, ((byte)(134)));
            this.sensorTwoCur.ForeColor = System.Drawing.Color.Blue;
            this.sensorTwoCur.Location = new System.Drawing.Point(130, 34);
            this.sensorTwoCur.Name = "sensorTwoCur";
            this.sensorTwoCur.ReadOnly = true;
            this.sensorTwoCur.Size = new System.Drawing.Size(60, 22);
            this.sensorTwoCur.TabIndex = 53;
            this.sensorTwoCur.TextAlign = System.Windows.Forms.HorizontalAlignment.Center;
            // 
            // sensorOneCur
            // 
            this.sensorOneCur.BackColor = System.Drawing.Color.White;
            this.sensorOneCur.BorderStyle = System.Windows.Forms.BorderStyle.None;
            this.sensorOneCur.Font = new System.Drawing.Font("宋体", 14.25F, System.Drawing.FontStyle.Regular, System.Drawing.GraphicsUnit.Point, ((byte)(134)));
            this.sensorOneCur.ForeColor = System.Drawing.Color.Blue;
            this.sensorOneCur.Location = new System.Drawing.Point(130, 11);
            this.sensorOneCur.Name = "sensorOneCur";
            this.sensorOneCur.ReadOnly = true;
            this.sensorOneCur.Size = new System.Drawing.Size(60, 22);
            this.sensorOneCur.TabIndex = 52;
            this.sensorOneCur.TextAlign = System.Windows.Forms.HorizontalAlignment.Center;
            // 
            // sensorFiveVol
            // 
            this.sensorFiveVol.BackColor = System.Drawing.Color.White;
            this.sensorFiveVol.BorderStyle = System.Windows.Forms.BorderStyle.None;
            this.sensorFiveVol.Font = new System.Drawing.Font("宋体", 12F, System.Drawing.FontStyle.Regular, System.Drawing.GraphicsUnit.Point, ((byte)(134)));
            this.sensorFiveVol.ForeColor = System.Drawing.Color.Red;
            this.sensorFiveVol.Location = new System.Drawing.Point(46, 103);
            this.sensorFiveVol.Name = "sensorFiveVol";
            this.sensorFiveVol.ReadOnly = true;
            this.sensorFiveVol.Size = new System.Drawing.Size(60, 19);
            this.sensorFiveVol.TabIndex = 57;
            this.sensorFiveVol.TextAlign = System.Windows.Forms.HorizontalAlignment.Center;
            // 
            // sensorThreeVol
            // 
            this.sensorThreeVol.BackColor = System.Drawing.Color.White;
            this.sensorThreeVol.BorderStyle = System.Windows.Forms.BorderStyle.None;
            this.sensorThreeVol.Font = new System.Drawing.Font("宋体", 12F, System.Drawing.FontStyle.Regular, System.Drawing.GraphicsUnit.Point, ((byte)(134)));
            this.sensorThreeVol.ForeColor = System.Drawing.Color.Red;
            this.sensorThreeVol.Location = new System.Drawing.Point(46, 57);
            this.sensorThreeVol.Name = "sensorThreeVol";
            this.sensorThreeVol.ReadOnly = true;
            this.sensorThreeVol.Size = new System.Drawing.Size(60, 19);
            this.sensorThreeVol.TabIndex = 56;
            this.sensorThreeVol.TextAlign = System.Windows.Forms.HorizontalAlignment.Center;
            // 
            // label91
            // 
            this.label91.AutoSize = true;
            this.label91.Font = new System.Drawing.Font("Times New Roman", 12F, System.Drawing.FontStyle.Bold, System.Drawing.GraphicsUnit.Point, ((byte)(0)));
            this.label91.ForeColor = System.Drawing.Color.Black;
            this.label91.Location = new System.Drawing.Point(1, 107);
            this.label91.Name = "label91";
            this.label91.Size = new System.Drawing.Size(68, 19);
            this.label91.TabIndex = 41;
            this.label91.Text = "通道5：";
            // 
            // sensorFourVol
            // 
            this.sensorFourVol.BackColor = System.Drawing.Color.White;
            this.sensorFourVol.BorderStyle = System.Windows.Forms.BorderStyle.None;
            this.sensorFourVol.Font = new System.Drawing.Font("宋体", 12F, System.Drawing.FontStyle.Regular, System.Drawing.GraphicsUnit.Point, ((byte)(134)));
            this.sensorFourVol.ForeColor = System.Drawing.Color.Red;
            this.sensorFourVol.Location = new System.Drawing.Point(46, 80);
            this.sensorFourVol.Name = "sensorFourVol";
            this.sensorFourVol.ReadOnly = true;
            this.sensorFourVol.Size = new System.Drawing.Size(60, 19);
            this.sensorFourVol.TabIndex = 54;
            this.sensorFourVol.TextAlign = System.Windows.Forms.HorizontalAlignment.Center;
            // 
            // label92
            // 
            this.label92.AutoSize = true;
            this.label92.Font = new System.Drawing.Font("Times New Roman", 12F, System.Drawing.FontStyle.Bold, System.Drawing.GraphicsUnit.Point, ((byte)(0)));
            this.label92.ForeColor = System.Drawing.Color.Black;
            this.label92.Location = new System.Drawing.Point(1, 59);
            this.label92.Name = "label92";
            this.label92.Size = new System.Drawing.Size(68, 19);
            this.label92.TabIndex = 40;
            this.label92.Text = "通道3：";
            // 
            // label93
            // 
            this.label93.AutoSize = true;
            this.label93.Font = new System.Drawing.Font("Times New Roman", 12F, System.Drawing.FontStyle.Bold, System.Drawing.GraphicsUnit.Point, ((byte)(0)));
            this.label93.ForeColor = System.Drawing.Color.Black;
            this.label93.Location = new System.Drawing.Point(1, 83);
            this.label93.Name = "label93";
            this.label93.Size = new System.Drawing.Size(68, 19);
            this.label93.TabIndex = 39;
            this.label93.Text = "通道4：";
            // 
            // sensorTwoVol
            // 
            this.sensorTwoVol.BackColor = System.Drawing.Color.White;
            this.sensorTwoVol.BorderStyle = System.Windows.Forms.BorderStyle.None;
            this.sensorTwoVol.Font = new System.Drawing.Font("宋体", 12F, System.Drawing.FontStyle.Regular, System.Drawing.GraphicsUnit.Point, ((byte)(134)));
            this.sensorTwoVol.ForeColor = System.Drawing.Color.Red;
            this.sensorTwoVol.Location = new System.Drawing.Point(46, 34);
            this.sensorTwoVol.Name = "sensorTwoVol";
            this.sensorTwoVol.ReadOnly = true;
            this.sensorTwoVol.Size = new System.Drawing.Size(60, 19);
            this.sensorTwoVol.TabIndex = 55;
            this.sensorTwoVol.TextAlign = System.Windows.Forms.HorizontalAlignment.Center;
            // 
            // label94
            // 
            this.label94.AutoSize = true;
            this.label94.Font = new System.Drawing.Font("Times New Roman", 12F, System.Drawing.FontStyle.Bold, System.Drawing.GraphicsUnit.Point, ((byte)(0)));
            this.label94.ForeColor = System.Drawing.Color.Black;
            this.label94.Location = new System.Drawing.Point(1, 35);
            this.label94.Name = "label94";
            this.label94.Size = new System.Drawing.Size(68, 19);
            this.label94.TabIndex = 43;
            this.label94.Text = "通道2：";
            // 
            // sensorOneVol
            // 
            this.sensorOneVol.BackColor = System.Drawing.Color.White;
            this.sensorOneVol.BorderStyle = System.Windows.Forms.BorderStyle.None;
            this.sensorOneVol.Font = new System.Drawing.Font("宋体", 12F, System.Drawing.FontStyle.Regular, System.Drawing.GraphicsUnit.Point, ((byte)(134)));
            this.sensorOneVol.ForeColor = System.Drawing.Color.Red;
            this.sensorOneVol.Location = new System.Drawing.Point(46, 11);
            this.sensorOneVol.Name = "sensorOneVol";
            this.sensorOneVol.ReadOnly = true;
            this.sensorOneVol.Size = new System.Drawing.Size(60, 19);
            this.sensorOneVol.TabIndex = 58;
            this.sensorOneVol.TextAlign = System.Windows.Forms.HorizontalAlignment.Center;
            // 
            // label95
            // 
            this.label95.AutoSize = true;
            this.label95.Font = new System.Drawing.Font("Times New Roman", 12F, System.Drawing.FontStyle.Bold, System.Drawing.GraphicsUnit.Point, ((byte)(0)));
            this.label95.ForeColor = System.Drawing.Color.Black;
            this.label95.Location = new System.Drawing.Point(1, 11);
            this.label95.Name = "label95";
            this.label95.Size = new System.Drawing.Size(68, 19);
            this.label95.TabIndex = 42;
            this.label95.Text = "通道1：";
            // 
            // dataGridView1
            // 
            dataGridViewCellStyle1.BackColor = System.Drawing.Color.LightCyan;
            this.dataGridView1.AlternatingRowsDefaultCellStyle = dataGridViewCellStyle1;
            this.dataGridView1.AutoSizeColumnsMode = System.Windows.Forms.DataGridViewAutoSizeColumnsMode.Fill;
            this.dataGridView1.AutoSizeRowsMode = System.Windows.Forms.DataGridViewAutoSizeRowsMode.AllCells;
            this.dataGridView1.BackgroundColor = System.Drawing.SystemColors.Control;
            dataGridViewCellStyle2.Alignment = System.Windows.Forms.DataGridViewContentAlignment.MiddleLeft;
            dataGridViewCellStyle2.BackColor = System.Drawing.Color.FromArgb(((int)(((byte)(234)))), ((int)(((byte)(242)))), ((int)(((byte)(250)))));
            dataGridViewCellStyle2.Font = new System.Drawing.Font("宋体", 14.25F, System.Drawing.FontStyle.Bold);
            dataGridViewCellStyle2.ForeColor = System.Drawing.SystemColors.WindowText;
            dataGridViewCellStyle2.SelectionBackColor = System.Drawing.SystemColors.Highlight;
            dataGridViewCellStyle2.SelectionForeColor = System.Drawing.SystemColors.HighlightText;
            dataGridViewCellStyle2.WrapMode = System.Windows.Forms.DataGridViewTriState.True;
            this.dataGridView1.ColumnHeadersDefaultCellStyle = dataGridViewCellStyle2;
            this.dataGridView1.ColumnHeadersHeightSizeMode = System.Windows.Forms.DataGridViewColumnHeadersHeightSizeMode.AutoSize;
            dataGridViewCellStyle3.Alignment = System.Windows.Forms.DataGridViewContentAlignment.MiddleLeft;
            dataGridViewCellStyle3.BackColor = System.Drawing.Color.FromArgb(((int)(((byte)(251)))), ((int)(((byte)(251)))), ((int)(((byte)(243)))));
            dataGridViewCellStyle3.Font = new System.Drawing.Font("宋体", 14.25F, System.Drawing.FontStyle.Bold);
            dataGridViewCellStyle3.ForeColor = System.Drawing.Color.Maroon;
            dataGridViewCellStyle3.SelectionBackColor = System.Drawing.Color.FromArgb(((int)(((byte)(213)))), ((int)(((byte)(232)))), ((int)(((byte)(255)))));
            dataGridViewCellStyle3.SelectionForeColor = System.Drawing.SystemColors.ControlDarkDark;
            dataGridViewCellStyle3.WrapMode = System.Windows.Forms.DataGridViewTriState.False;
            this.dataGridView1.DefaultCellStyle = dataGridViewCellStyle3;
            this.dataGridView1.Dock = System.Windows.Forms.DockStyle.Fill;
            this.dataGridView1.EnableHeadersVisualStyles = false;
            this.dataGridView1.Location = new System.Drawing.Point(0, 0);
            this.dataGridView1.MultiSelect = false;
            this.dataGridView1.Name = "dataGridView1";
            dataGridViewCellStyle4.Alignment = System.Windows.Forms.DataGridViewContentAlignment.MiddleLeft;
            dataGridViewCellStyle4.BackColor = System.Drawing.SystemColors.Control;
            dataGridViewCellStyle4.Font = new System.Drawing.Font("Microsoft Sans Serif", 14.25F, System.Drawing.FontStyle.Bold);
            dataGridViewCellStyle4.ForeColor = System.Drawing.SystemColors.WindowText;
            dataGridViewCellStyle4.SelectionBackColor = System.Drawing.SystemColors.Highlight;
            dataGridViewCellStyle4.SelectionForeColor = System.Drawing.SystemColors.HighlightText;
            dataGridViewCellStyle4.WrapMode = System.Windows.Forms.DataGridViewTriState.True;
            this.dataGridView1.RowHeadersDefaultCellStyle = dataGridViewCellStyle4;
            dataGridViewCellStyle5.ForeColor = System.Drawing.Color.Black;
            this.dataGridView1.RowsDefaultCellStyle = dataGridViewCellStyle5;
            this.dataGridView1.RowTemplate.Height = 23;
            this.dataGridView1.Size = new System.Drawing.Size(715, 234);
            this.dataGridView1.TabIndex = 0;
            // 
            // DCDataInfo
            // 
            this.AutoScaleDimensions = new System.Drawing.SizeF(6F, 12F);
            this.AutoScaleMode = System.Windows.Forms.AutoScaleMode.Font;
            this.ClientSize = new System.Drawing.Size(727, 500);
            this.Controls.Add(this.tableLayoutPanel1);
            this.FormBorderStyle = System.Windows.Forms.FormBorderStyle.None;
            this.Name = "DCDataInfo";
            this.Text = "DCDataInfo";
            this.Load += new System.EventHandler(this.DCDataInfo_Load);
            this.tableLayoutPanel1.ResumeLayout(false);
            this.groupBox2.ResumeLayout(false);
            this.panel1.ResumeLayout(false);
            this.groupBox1.ResumeLayout(false);
            this.panel2.ResumeLayout(false);
            this.panel2.PerformLayout();
            ((System.ComponentModel.ISupportInitialize)(this.dataGridView1)).EndInit();
            this.ResumeLayout(false);

        }

        #endregion

        private System.Windows.Forms.TableLayoutPanel tableLayoutPanel1;
        private System.Windows.Forms.GroupBox groupBox2;
        private System.Windows.Forms.Panel panel1;
        private System.Windows.Forms.GroupBox groupBox1;
        private System.Windows.Forms.Panel panel2;
        private System.Windows.Forms.Label label75;
        private System.Windows.Forms.Label label77;
        private System.Windows.Forms.Label label78;
        private System.Windows.Forms.Label label79;
        private System.Windows.Forms.Label label80;
        private System.Windows.Forms.Label label81;
        private System.Windows.Forms.Label label82;
        private System.Windows.Forms.Label label83;
        private System.Windows.Forms.Label label84;
        private System.Windows.Forms.Label label85;
        private System.Windows.Forms.Label label86;
        private System.Windows.Forms.Label label87;
        private System.Windows.Forms.Label label88;
        private System.Windows.Forms.Label label89;
        private System.Windows.Forms.Label label90;
        public System.Windows.Forms.TextBox sensorFiveTime;
        public System.Windows.Forms.TextBox sensorFourTime;
        public System.Windows.Forms.TextBox sensorThreeTime;
        public System.Windows.Forms.TextBox sensorTwoTime;
        public System.Windows.Forms.TextBox sensorOneTime;
        public System.Windows.Forms.TextBox sensorFivePower;
        public System.Windows.Forms.TextBox sensorThreePower;
        public System.Windows.Forms.TextBox sensorFourPower;
        public System.Windows.Forms.TextBox sensorTwoPower;
        public System.Windows.Forms.TextBox sensorOnePower;
        public System.Windows.Forms.TextBox sensorFiveCur;
        public System.Windows.Forms.TextBox sensorThreeCur;
        public System.Windows.Forms.TextBox sensorFourCur;
        public System.Windows.Forms.TextBox sensorTwoCur;
        public System.Windows.Forms.TextBox sensorOneCur;
        public System.Windows.Forms.TextBox sensorFiveVol;
        public System.Windows.Forms.TextBox sensorThreeVol;
        private System.Windows.Forms.Label label91;
        public System.Windows.Forms.TextBox sensorFourVol;
        private System.Windows.Forms.Label label92;
        private System.Windows.Forms.Label label93;
        public System.Windows.Forms.TextBox sensorTwoVol;
        private System.Windows.Forms.Label label94;
        public System.Windows.Forms.TextBox sensorOneVol;
        private System.Windows.Forms.Label label95;
        public System.Windows.Forms.DataGridView dataGridView1;
    }
}
