# Supplementary material
Source: MDPI journal article supplement (https://www.mdpi.com/2077-1312/10/8/1051)
Supplement: s1 [file s1 › DMS/DMS/deviceInfo.Designer.cs]

namespace DMS
{
    partial class deviceInfo
    {
        /// <summary>
        /// Required designer variable.
        /// </summary>
        private System.ComponentModel.IContainer components = null;

        /// <summary>
        /// Clean up any resources being used.
        /// </summary>
        /// <param name="disposing">true if managed resources should be disposed; otherwise, false.</param>
        protected override void Dispose(bool disposing)
        {
            if (disposing && (components != null))
            {
                components.Dispose();
            }
            base.Dispose(disposing);
        }

        #region Windows Form Designer generated code

        /// <summary>
        /// Required method for Designer support - do not modify
        /// the contents of this method with the code editor.
        /// </summary>
        private void InitializeComponent()
        {
            this.dgMjbInfo = new System.Windows.Forms.DataGridView();
            this.btnSearch = new System.Windows.Forms.Button();
            this.txtChlNum = new System.Windows.Forms.TextBox();
            this.修改ToolStripMenuItem = new System.Windows.Forms.ToolStripMenuItem();
            this.增加ToolStripMenuItem1 = new System.Windows.Forms.ToolStripMenuItem();
            this.label5 = new System.Windows.Forms.Label();
            this.txtPort = new System.Windows.Forms.TextBox();
            this.删除ToolStripMenuItem = new System.Windows.Forms.ToolStripMenuItem();
            this.刷新ToolStripMenuItem = new System.Windows.Forms.ToolStripMenuItem();
            this.label4 = new System.Windows.Forms.Label();
            this.txtIP = new System.Windows.Forms.TextBox();
            this.增加ToolStripMenuItem = new System.Windows.Forms.ToolStripMenuItem();
            this.label3 = new System.Windows.Forms.Label();
            this.tableLayoutPanel1 = new System.Windows.Forms.TableLayoutPanel();
            this.panel1 = new System.Windows.Forms.Panel();
            this.comboBox1 = new System.Windows.Forms.ComboBox();
            this.label2 = new System.Windows.Forms.Label();
            this.txtDeviceCode = new System.Windows.Forms.TextBox();
            this.label1 = new System.Windows.Forms.Label();
            this.menuStrip1 = new System.Windows.Forms.MenuStrip();
            this.退出ToolStripMenuItem = new System.Windows.Forms.ToolStripMenuItem();
            ((System.ComponentModel.ISupportInitialize)(this.dgMjbInfo)).BeginInit();
            this.tableLayoutPanel1.SuspendLayout();
            this.panel1.SuspendLayout();
            this.menuStrip1.SuspendLayout();
            this.SuspendLayout();
            // 
            // dgMjbInfo
            // 
            this.dgMjbInfo.ColumnHeadersHeightSizeMode = System.Windows.Forms.DataGridViewColumnHeadersHeightSizeMode.AutoSize;
            this.dgMjbInfo.Dock = System.Windows.Forms.DockStyle.Fill;
            this.dgMjbInfo.Location = new System.Drawing.Point(3, 96);
            this.dgMjbInfo.Name = "dgMjbInfo";
            this.dgMjbInfo.RowTemplate.Height = 23;
            this.dgMjbInfo.Size = new System.Drawing.Size(597, 292);
            this.dgMjbInfo.TabIndex = 0;
            this.dgMjbInfo.RowPostPaint += new System.Windows.Forms.DataGridViewRowPostPaintEventHandler(this.dgMjbInfo_RowPostPaint);
            // 
            // btnSearch
            // 
            this.btnSearch.Location = new System.Drawing.Point(512, 38);
            this.btnSearch.Name = "btnSearch";
            this.btnSearch.Size = new System.Drawing.Size(75, 23);
            this.btnSearch.TabIndex = 10;
            this.btnSearch.Text = "查询";
            this.btnSearch.UseVisualStyleBackColor = true;
            // 
            // txtChlNum
            // 
            this.txtChlNum.Location = new System.Drawing.Point(443, 40);
            this.txtChlNum.Name = "txtChlNum";
            this.txtChlNum.Size = new System.Drawing.Size(52, 21);
            this.txtChlNum.TabIndex = 9;
            // 
            // 修改ToolStripMenuItem
            // 
            this.修改ToolStripMenuItem.Name = "修改ToolStripMenuItem";
            this.修改ToolStripMenuItem.Size = new System.Drawing.Size(100, 22);
            this.修改ToolStripMenuItem.Text = "修改";
            this.修改ToolStripMenuItem.Click += new System.EventHandler(this.修改ToolStripMenuItem_Click);
            // 
            // 增加ToolStripMenuItem1
            // 
            this.增加ToolStripMenuItem1.Name = "增加ToolStripMenuItem1";
            this.增加ToolStripMenuItem1.Size = new System.Drawing.Size(100, 22);
            this.增加ToolStripMenuItem1.Text = "增加";
            this.增加ToolStripMenuItem1.Click += new System.EventHandler(this.增加ToolStripMenuItem1_Click);
            // 
            // label5
            // 
            this.label5.AutoSize = true;
            this.label5.Location = new System.Drawing.Point(396, 44);
            this.label5.Name = "label5";
            this.label5.Size = new System.Drawing.Size(53, 12);
            this.label5.TabIndex = 8;
            this.label5.Text = "通道数：";
            // 
            // txtPort
            // 
            this.txtPort.Location = new System.Drawing.Point(338, 40);
            this.txtPort.Name = "txtPort";
            this.txtPort.Size = new System.Drawing.Size(52, 21);
            this.txtPort.TabIndex = 7;
            // 
            // 删除ToolStripMenuItem
            // 
            this.删除ToolStripMenuItem.Name = "删除ToolStripMenuItem";
            this.删除ToolStripMenuItem.Size = new System.Drawing.Size(100, 22);
            this.删除ToolStripMenuItem.Text = "删除";
            this.删除ToolStripMenuItem.Click += new System.EventHandler(this.删除ToolStripMenuItem_Click);
            // 
            // 刷新ToolStripMenuItem
            // 
            this.刷新ToolStripMenuItem.Name = "刷新ToolStripMenuItem";
            this.刷新ToolStripMenuItem.Size = new System.Drawing.Size(100, 22);
            this.刷新ToolStripMenuItem.Text = "刷新";
            // 
            // label4
            // 
            this.label4.AutoSize = true;
            this.label4.Location = new System.Drawing.Point(303, 44);
            this.label4.Name = "label4";
            this.label4.Size = new System.Drawing.Size(41, 12);
            this.label4.TabIndex = 6;
            this.label4.Text = "端口：";
            // 
            // txtIP
            // 
            this.txtIP.Location = new System.Drawing.Point(245, 40);
            this.txtIP.Name = "txtIP";
            this.txtIP.Size = new System.Drawing.Size(52, 21);
            this.txtIP.TabIndex = 5;
            // 
            // 增加ToolStripMenuItem
            // 
            this.增加ToolStripMenuItem.DropDownItems.AddRange(new System.Windows.Forms.ToolStripItem[] {
            this.增加ToolStripMenuItem1,
            this.修改ToolStripMenuItem,
            this.删除ToolStripMenuItem,
            this.刷新ToolStripMenuItem});
            this.增加ToolStripMenuItem.Name = "增加ToolStripMenuItem";
            this.增加ToolStripMenuItem.Size = new System.Drawing.Size(44, 21);
            this.增加ToolStripMenuItem.Text = "设置";
            // 
            // label3
            // 
            this.label3.AutoSize = true;
            this.label3.Location = new System.Drawing.Point(220, 44);
            this.label3.Name = "label3";
            this.label3.Size = new System.Drawing.Size(29, 12);
            this.label3.TabIndex = 4;
            this.label3.Text = "IP：";
            // 
            // tableLayoutPanel1
            // 
            this.tableLayoutPanel1.ColumnCount = 1;
            this.tableLayoutPanel1.ColumnStyles.Add(new System.Windows.Forms.ColumnStyle(System.Windows.Forms.SizeType.Percent, 50F));
            this.tableLayoutPanel1.Controls.Add(this.dgMjbInfo, 0, 1);
            this.tableLayoutPanel1.Controls.Add(this.panel1, 0, 0);
            this.tableLayoutPanel1.Dock = System.Windows.Forms.DockStyle.Fill;
            this.tableLayoutPanel1.Location = new System.Drawing.Point(0, 0);
            this.tableLayoutPanel1.Name = "tableLayoutPanel1";
            this.tableLayoutPanel1.RowCount = 2;
            this.tableLayoutPanel1.RowStyles.Add(new System.Windows.Forms.RowStyle(System.Windows.Forms.SizeType.Percent, 24.04092F));
            this.tableLayoutPanel1.RowStyles.Add(new System.Windows.Forms.RowStyle(System.Windows.Forms.SizeType.Percent, 75.95908F));
            this.tableLayoutPanel1.Size = new System.Drawing.Size(603, 391);
            this.tableLayoutPanel1.TabIndex = 2;
            // 
            // panel1
            // 
            this.panel1.Controls.Add(this.btnSearch);
            this.panel1.Controls.Add(this.txtChlNum);
            this.panel1.Controls.Add(this.label5);
            this.panel1.Controls.Add(this.txtPort);
            this.panel1.Controls.Add(this.label4);
            this.panel1.Controls.Add(this.txtIP);
            this.panel1.Controls.Add(this.label3);
            this.panel1.Controls.Add(this.comboBox1);
            this.panel1.Controls.Add(this.label2);
            this.panel1.Controls.Add(this.txtDeviceCode);
            this.panel1.Controls.Add(this.label1);
            this.panel1.Controls.Add(this.menuStrip1);
            this.panel1.Dock = System.Windows.Forms.DockStyle.Fill;
            this.panel1.Location = new System.Drawing.Point(3, 3);
            this.panel1.Name = "panel1";
            this.panel1.Size = new System.Drawing.Size(597, 87);
            this.panel1.TabIndex = 1;
            // 
            // comboBox1
            // 
            this.comboBox1.FormattingEnabled = true;
            this.comboBox1.Location = new System.Drawing.Point(137, 41);
            this.comboBox1.Name = "comboBox1";
            this.comboBox1.Size = new System.Drawing.Size(77, 20);
            this.comboBox1.TabIndex = 3;
            // 
            // label2
            // 
            this.label2.AutoSize = true;
            this.label2.Location = new System.Drawing.Point(100, 44);
            this.label2.Name = "label2";
            this.label2.Size = new System.Drawing.Size(41, 12);
            this.label2.TabIndex = 2;
            this.label2.Text = "类型：";
            // 
            // txtDeviceCode
            // 
            this.txtDeviceCode.Location = new System.Drawing.Point(42, 41);
            this.txtDeviceCode.Name = "txtDeviceCode";
            this.txtDeviceCode.Size = new System.Drawing.Size(52, 21);
            this.txtDeviceCode.TabIndex = 1;
            // 
            // label1
            // 
            this.label1.AutoSize = true;
            this.label1.Location = new System.Drawing.Point(10, 44);
            this.label1.Name = "label1";
            this.label1.Size = new System.Drawing.Size(41, 12);
            this.label1.TabIndex = 0;
            this.label1.Text = "编码：";
            // 
            // menuStrip1
            // 
            this.menuStrip1.Items.AddRange(new System.Windows.Forms.ToolStripItem[] {
            this.增加ToolStripMenuItem,
            this.退出ToolStripMenuItem});
            this.menuStrip1.Location = new System.Drawing.Point(0, 0);
            this.menuStrip1.Name = "menuStrip1";
            this.menuStrip1.Size = new System.Drawing.Size(597, 25);
            this.menuStrip1.TabIndex = 11;
            this.menuStrip1.Text = "menuStrip1";
            // 
            // 退出ToolStripMenuItem
            // 
            this.退出ToolStripMenuItem.Name = "退出ToolStripMenuItem";
            this.退出ToolStripMenuItem.Size = new System.Drawing.Size(44, 21);
            this.退出ToolStripMenuItem.Text = "退出";
            // 
            // deviceInfo
            // 
            this.AutoScaleDimensions = new System.Drawing.SizeF(6F, 12F);
            this.AutoScaleMode = System.Windows.Forms.AutoScaleMode.Font;
            this.ClientSize = new System.Drawing.Size(603, 391);
            this.Controls.Add(this.tableLayoutPanel1);
            this.FormBorderStyle = System.Windows.Forms.FormBorderStyle.FixedToolWindow;
            this.Name = "deviceInfo";
            this.StartPosition = System.Windows.Forms.FormStartPosition.CenterScreen;
            this.Text = "设备信息维护";
            this.Load += new System.EventHandler(this.deviceInfo_Load);
            ((System.ComponentModel.ISupportInitialize)(this.dgMjbInfo)).EndInit();
            this.tableLayoutPanel1.ResumeLayout(false);
            this.panel1.ResumeLayout(false);
            this.panel1.PerformLayout();
            this.menuStrip1.ResumeLayout(false);
            this.menuStrip1.PerformLayout();
            this.ResumeLayout(false);

        }

        #endregion

        private System.Windows.Forms.DataGridView dgMjbInfo;
        private System.Windows.Forms.Button btnSearch;
        private System.Windows.Forms.TextBox txtChlNum;
        private System.Windows.Forms.ToolStripMenuItem 修改ToolStripMenuItem;
        private System.Windows.Forms.ToolStripMenuItem 增加ToolStripMenuItem1;
        private System.Windows.Forms.Label label5;
        private System.Windows.Forms.TextBox txtPort;
        private System.Windows.Forms.ToolStripMenuItem 删除ToolStripMenuItem;
        private System.Windows.Forms.ToolStripMenuItem 刷新ToolStripMenuItem;
        private System.Windows.Forms.Label label4;
        private System.Windows.Forms.TextBox txtIP;
        private System.Windows.Forms.ToolStripMenuItem 增加ToolStripMenuItem;
        private System.Windows.Forms.Label label3;
        private System.Windows.Forms.TableLayoutPanel tableLayoutPanel1;
        private System.Windows.Forms.Panel panel1;
        private System.Windows.Forms.ComboBox comboBox1;
        private System.Windows.Forms.Label label2;
        private System.Windows.Forms.TextBox txtDeviceCode;
        private System.Windows.Forms.Label label1;
        private System.Windows.Forms.MenuStrip menuStrip1;
        private System.Windows.Forms.ToolStripMenuItem 退出ToolStripMenuItem;
    }
}
