# Supplementary material
Source: MDPI journal article supplement (https://www.mdpi.com/2077-1312/10/8/1051)
Supplement: s1 [file s1 › DMS/DMS/DMS.csproj]

<?xml version="1.0" encoding="utf-8"?>
<Project ToolsVersion="4.0" DefaultTargets="Build" xmlns="http://schemas.microsoft.com/developer/msbuild/2003">
  <PropertyGroup>
    <Configuration Condition=" '$(Configuration)' == '' ">Debug</Configuration>
    <Platform Condition=" '$(Platform)' == '' ">x86</Platform>
    <ProductVersion>8.0.30703</ProductVersion>
    <SchemaVersion>2.0</SchemaVersion>
    <ProjectGuid>{D0F5AC71-E756-40A2-AC74-9AFE37BFD7BA}</ProjectGuid>
    <OutputType>WinExe</OutputType>
    <AppDesignerFolder>Properties</AppDesignerFolder>
    <RootNamespace>DMS</RootNamespace>
    <AssemblyName>DMS</AssemblyName>
    <TargetFrameworkVersion>v4.0</TargetFrameworkVersion>
    <TargetFrameworkProfile>Client</TargetFrameworkProfile>
    <FileAlignment>512</FileAlignment>
  </PropertyGroup>
  <PropertyGroup Condition=" '$(Configuration)|$(Platform)' == 'Debug|x86' ">
    <PlatformTarget>x86</PlatformTarget>
    <DebugSymbols>true</DebugSymbols>
    <DebugType>full</DebugType>
    <Optimize>false</Optimize>
    <OutputPath>bin\Debug\</OutputPath>
    <DefineConstants>DEBUG;TRACE</DefineConstants>
    <ErrorReport>prompt</ErrorReport>
    <WarningLevel>4</WarningLevel>
  </PropertyGroup>
  <PropertyGroup Condition=" '$(Configuration)|$(Platform)' == 'Release|x86' ">
    <PlatformTarget>x86</PlatformTarget>
    <DebugType>pdbonly</DebugType>
    <Optimize>true</Optimize>
    <OutputPath>bin\Release\</OutputPath>
    <DefineConstants>TRACE</DefineConstants>
    <ErrorReport>prompt</ErrorReport>
    <WarningLevel>4</WarningLevel>
  </PropertyGroup>
  <ItemGroup>
    <Reference Include="mysql.data, Version=6.7.4.0, Culture=neutral, PublicKeyToken=c5687fc88969c44d, processorArchitecture=MSIL">
      <SpecificVersion>False</SpecificVersion>
      <HintPath>bin\Debug\mysql.data.dll</HintPath>
    </Reference>
    <Reference Include="System" />
    <Reference Include="System.Core" />
    <Reference Include="System.Xml.Linq" />
    <Reference Include="System.Data.DataSetExtensions" />
    <Reference Include="Microsoft.CSharp" />
    <Reference Include="System.Data" />
    <Reference Include="System.Deployment" />
    <Reference Include="System.Drawing" />
    <Reference Include="System.Windows.Forms" />
    <Reference Include="System.Xml" />
  </ItemGroup>
  <ItemGroup>
    <Compile Include="addDeviceInfo.cs">
      <SubType>Form</SubType>
    </Compile>
    <Compile Include="addDeviceInfo.Designer.cs">
      <DependentUpon>addDeviceInfo.cs</DependentUpon>
    </Compile>
    <Compile Include="addMjbInfo.cs">
      <SubType>Form</SubType>
    </Compile>
    <Compile Include="addMjbInfo.Designer.cs">
      <DependentUpon>addMjbInfo.cs</DependentUpon>
    </Compile>
    <Compile Include="CRC32.cs" />
    <Compile Include="DCDataInfo.cs">
      <SubType>Form</SubType>
    </Compile>
    <Compile Include="DCDataInfo.Designer.cs">
      <DependentUpon>DCDataInfo.cs</DependentUpon>
    </Compile>
    <Compile Include="deviceInfo.cs">
      <SubType>Form</SubType>
    </Compile>
    <Compile Include="deviceInfo.Designer.cs">
      <DependentUpon>deviceInfo.cs</DependentUpon>
    </Compile>
    <Compile Include="FontClass.cs" />
    <Compile Include="GPSInfo.cs">
      <SubType>Form</SubType>
    </Compile>
    <Compile Include="GPSInfo.Designer.cs">
      <DependentUpon>GPSInfo.cs</DependentUpon>
    </Compile>
    <Compile Include="jbInfo.cs">
      <SubType>Form</SubType>
    </Compile>
    <Compile Include="jbInfo.Designer.cs">
      <DependentUpon>jbInfo.cs</DependentUpon>
    </Compile>
    <Compile Include="LogClass.cs" />
    <Compile Include="Main.cs">
      <SubType>Form</SubType>
    </Compile>
    <Compile Include="Main.Designer.cs">
      <DependentUpon>Main.cs</DependentUpon>
    </Compile>
    <Compile Include="MjbManagement.cs">
      <SubType>Form</SubType>
    </Compile>
    <Compile Include="MjbManagement.Designer.cs">
      <DependentUpon>MjbManagement.cs</DependentUpon>
    </Compile>
    <Compile Include="modifyDeviceInfo.cs">
      <SubType>Form</SubType>
    </Compile>
    <Compile Include="modifyDeviceInfo.Designer.cs">
      <DependentUpon>modifyDeviceInfo.cs</DependentUpon>
    </Compile>
    <Compile Include="modifyMjbInfo.cs">
      <SubType>Form</SubType>
    </Compile>
    <Compile Include="modifyMjbInfo.Designer.cs">
      <DependentUpon>modifyMjbInfo.cs</DependentUpon>
    </Compile>
    <Compile Include="MyServerClass.cs" />
    <Compile Include="NodeManagement.cs">
      <SubType>Form</SubType>
    </Compile>
    <Compile Include="NodeManagement.Designer.cs">
      <DependentUpon>NodeManagement.cs</DependentUpon>
    </Compile>
    <Compile Include="Program.cs" />
    <Compile Include="Properties\AssemblyInfo.cs" />
    <Compile Include="ReceiveMsgClass.cs" />
    <Compile Include="SqlHelper.cs" />
    <EmbeddedResource Include="addDeviceInfo.resx">
      <DependentUpon>addDeviceInfo.cs</DependentUpon>
    </EmbeddedResource>
    <EmbeddedResource Include="addMjbInfo.resx">
      <DependentUpon>addMjbInfo.cs</DependentUpon>
    </EmbeddedResource>
    <EmbeddedResource Include="DCDataInfo.resx">
      <DependentUpon>DCDataInfo.cs</DependentUpon>
    </EmbeddedResource>
    <EmbeddedResource Include="deviceInfo.resx">
      <DependentUpon>deviceInfo.cs</DependentUpon>
    </EmbeddedResource>
    <EmbeddedResource Include="GPSInfo.resx">
      <DependentUpon>GPSInfo.cs</DependentUpon>
    </EmbeddedResource>
    <EmbeddedResource Include="jbInfo.resx">
      <DependentUpon>jbInfo.cs</DependentUpon>
    </EmbeddedResource>
    <EmbeddedResource Include="Main.resx">
      <DependentUpon>Main.cs</DependentUpon>
    </EmbeddedResource>
    <EmbeddedResource Include="MjbManagement.resx">
      <DependentUpon>MjbManagement.cs</DependentUpon>
    </EmbeddedResource>
    <EmbeddedResource Include="modifyDeviceInfo.resx">
      <DependentUpon>modifyDeviceInfo.cs</DependentUpon>
    </EmbeddedResource>
    <EmbeddedResource Include="modifyMjbInfo.resx">
      <DependentUpon>modifyMjbInfo.cs</DependentUpon>
    </EmbeddedResource>
    <EmbeddedResource Include="NodeManagement.resx">
      <DependentUpon>NodeManagement.cs</DependentUpon>
    </EmbeddedResource>
    <EmbeddedResource Include="Properties\Resources.resx">
      <Generator>ResXFileCodeGenerator</Generator>
      <LastGenOutput>Resources.Designer.cs</LastGenOutput>
      <SubType>Designer</SubType>
    </EmbeddedResource>
    <Compile Include="Properties\Resources.Designer.cs">
      <AutoGen>True</AutoGen>
      <DependentUpon>Resources.resx</DependentUpon>
    </Compile>
    <None Include="Properties\Settings.settings">
      <Generator>SettingsSingleFileGenerator</Generator>
      <LastGenOutput>Settings.Designer.cs</LastGenOutput>
    </None>
    <Compile Include="Properties\Settings.Designer.cs">
      <AutoGen>True</AutoGen>
      <DependentUpon>Settings.settings</DependentUpon>
      <DesignTimeSharedInput>True</DesignTimeSharedInput>
    </Compile>
  </ItemGroup>
  <Import Project="$(MSBuildToolsPath)\Microsoft.CSharp.targets" />
  <!-- To modify your build process, add your task inside one of the targets below and uncomment it. 
       Other similar extension points exist, see Microsoft.Common.targets.
  <Target Name="BeforeBuild">
  </Target>
  <Target Name="AfterBuild">
  </Target>
  -->
</Project>
