# Supplementary material
Source: MDPI journal article supplement (https://www.mdpi.com/2077-1312/10/8/1051)
Supplement: s1 [file s1 › DMS/DMS/FontClass.cs]

using System;
using System.Collections.Generic;
using System.Linq;
using System.Text;
using System.Windows.Forms;
using System.Drawing;

namespace DMS
{
    class FontClass
    {
        System.Drawing.Text.PrivateFontCollection privateFonts;
        public System.Drawing.Font fontLed;//接驳盒状态信息以及数据采集器1，数据采集器2信息液晶字体显示，接驳盒指令设置液晶字体大小
        public System.Drawing.Font fontCollectorData;//数据采集器指令设置液晶字体格式

        public FontClass()
        {
            privateFonts = new System.Drawing.Text.PrivateFontCollection();
            privateFonts.AddFontFile(Application.StartupPath + "/digifaw.ttf");
            fontLed = new Font(privateFonts.Families[0], 13);
            fontCollectorData = new Font(privateFonts.Families[0], 10);

        }
    }
}
