# Supplementary material
Source: MDPI journal article supplement (https://www.mdpi.com/2077-1312/10/8/1051)
Supplement: s1 [file s1 › DMS/DMS/GPSInfo.Designer.cs]

namespace DMS
{
    partial class GPSInfo
    {
        /// <summary>
        /// Required designer variable.
        /// </summary>
        private System.ComponentModel.IContainer components = null;

        /// <summary>
        /// Clean up any resources being used.
        /// </summary>
        /// <param name="disposing">true if managed resources should be disposed; otherwise, false.</param>
        protected override void Dispose(bool disposing)
        {
            if (disposing && (components != null))
            {
                components.Dispose();
            }
            base.Dispose(disposing);
        }

        #region Windows Form Designer generated code

        /// <summary>
        /// Required method for Designer support - do not modify
        /// the contents of this method with the code editor.
        /// </summary>
        private void InitializeComponent()
        {
            this.tableLayoutPanel1 = new System.Windows.Forms.TableLayoutPanel();
            this.webGPS = new System.Windows.Forms.WebBrowser();
            this.panel1 = new System.Windows.Forms.Panel();
            this.textBox2 = new System.Windows.Forms.TextBox();
            this.label2 = new System.Windows.Forms.Label();
            this.textBox1 = new System.Windows.Forms.TextBox();
            this.label1 = new System.Windows.Forms.Label();
            this.button1 = new System.Windows.Forms.Button();
            this.tableLayoutPanel1.SuspendLayout();
            this.panel1.SuspendLayout();
            this.SuspendLayout();
            // 
            // tableLayoutPanel1
            // 
            this.tableLayoutPanel1.ColumnCount = 1;
            this.tableLayoutPanel1.ColumnStyles.Add(new System.Windows.Forms.ColumnStyle(System.Windows.Forms.SizeType.Percent, 50F));
            this.tableLayoutPanel1.Controls.Add(this.webGPS, 0, 1);
            this.tableLayoutPanel1.Controls.Add(this.panel1, 0, 0);
            this.tableLayoutPanel1.Dock = System.Windows.Forms.DockStyle.Fill;
            this.tableLayoutPanel1.Location = new System.Drawing.Point(0, 0);
            this.tableLayoutPanel1.Name = "tableLayoutPanel1";
            this.tableLayoutPanel1.RowCount = 2;
            this.tableLayoutPanel1.RowStyles.Add(new System.Windows.Forms.RowStyle(System.Windows.Forms.SizeType.Percent, 6.629834F));
            this.tableLayoutPanel1.RowStyles.Add(new System.Windows.Forms.RowStyle(System.Windows.Forms.SizeType.Percent, 93.37016F));
            this.tableLayoutPanel1.Size = new System.Drawing.Size(834, 581);
            this.tableLayoutPanel1.TabIndex = 0;
            // 
            // webGPS
            // 
            this.webGPS.Dock = System.Windows.Forms.DockStyle.Fill;
            this.webGPS.Location = new System.Drawing.Point(3, 41);
            this.webGPS.MinimumSize = new System.Drawing.Size(20, 20);
            this.webGPS.Name = "webGPS";
            this.webGPS.Size = new System.Drawing.Size(828, 537);
            this.webGPS.TabIndex = 0;
            // 
            // panel1
            // 
            this.panel1.Controls.Add(this.textBox2);
            this.panel1.Controls.Add(this.label2);
            this.panel1.Controls.Add(this.textBox1);
            this.panel1.Controls.Add(this.label1);
            this.panel1.Controls.Add(this.button1);
            this.panel1.Dock = System.Windows.Forms.DockStyle.Top;
            this.panel1.Location = new System.Drawing.Point(3, 3);
            this.panel1.Name = "panel1";
            this.panel1.Size = new System.Drawing.Size(828, 29);
            this.panel1.TabIndex = 1;
            // 
            // textBox2
            // 
            this.textBox2.Location = new System.Drawing.Point(368, 3);
            this.textBox2.Name = "textBox2";
            this.textBox2.Size = new System.Drawing.Size(100, 21);
            this.textBox2.TabIndex = 4;
            // 
            // label2
            // 
            this.label2.AutoSize = true;
            this.label2.Font = new System.Drawing.Font("华文仿宋", 12F, System.Drawing.FontStyle.Regular, System.Drawing.GraphicsUnit.Point, ((byte)(134)));
            this.label2.Location = new System.Drawing.Point(306, 5);
            this.label2.Name = "label2";
            this.label2.Size = new System.Drawing.Size(56, 18);
            this.label2.TabIndex = 3;
            this.label2.Text = "纬度：";
            // 
            // textBox1
            // 
            this.textBox1.Location = new System.Drawing.Point(187, 3);
            this.textBox1.Name = "textBox1";
            this.textBox1.Size = new System.Drawing.Size(100, 21);
            this.textBox1.TabIndex = 2;
            // 
            // label1
            // 
            this.label1.AutoSize = true;
            this.label1.Font = new System.Drawing.Font("华文仿宋", 12F, System.Drawing.FontStyle.Regular, System.Drawing.GraphicsUnit.Point, ((byte)(134)));
            this.label1.Location = new System.Drawing.Point(125, 5);
            this.label1.Name = "label1";
            this.label1.Size = new System.Drawing.Size(56, 18);
            this.label1.TabIndex = 1;
            this.label1.Text = "经度：";
            // 
            // button1
            // 
            this.button1.Dock = System.Windows.Forms.DockStyle.Left;
            this.button1.Font = new System.Drawing.Font("华文仿宋", 12F, System.Drawing.FontStyle.Regular, System.Drawing.GraphicsUnit.Point, ((byte)(134)));
            this.button1.Location = new System.Drawing.Point(0, 0);
            this.button1.Name = "button1";
            this.button1.Size = new System.Drawing.Size(109, 29);
            this.button1.TabIndex = 0;
            this.button1.Text = "加载GPS位置信息";
            this.button1.UseVisualStyleBackColor = true;
            this.button1.Click += new System.EventHandler(this.button1_Click_1);
            // 
            // GPSInfo
            // 
            this.AutoScaleDimensions = new System.Drawing.SizeF(6F, 12F);
            this.AutoScaleMode = System.Windows.Forms.AutoScaleMode.Font;
            this.ClientSize = new System.Drawing.Size(834, 581);
            this.Controls.Add(this.tableLayoutPanel1);
            this.FormBorderStyle = System.Windows.Forms.FormBorderStyle.None;
            this.Name = "GPSInfo";
            this.Text = "GPSInfo";
            this.Load += new System.EventHandler(this.GPSInfo_Load);
            this.tableLayoutPanel1.ResumeLayout(false);
            this.panel1.ResumeLayout(false);
            this.panel1.PerformLayout();
            this.ResumeLayout(false);

        }

        #endregion

        private System.Windows.Forms.TableLayoutPanel tableLayoutPanel1;
        private System.Windows.Forms.WebBrowser webGPS;
        private System.Windows.Forms.Panel panel1;
        private System.Windows.Forms.Button button1;
        private System.Windows.Forms.Label label1;
        private System.Windows.Forms.TextBox textBox1;
        private System.Windows.Forms.TextBox textBox2;
        private System.Windows.Forms.Label label2;

    }
}
