# Supplementary material
Source: MDPI journal article supplement (https://www.mdpi.com/2077-1312/10/8/1051)
Supplement: s1 [file s1 › DMS/DMS/Main.Designer.cs]

namespace DMS
{
    partial class Main
    {
        /// <summary>
        /// 必需的设计器变量。
        /// </summary>
        private System.ComponentModel.IContainer components = null;

        /// <summary>
        /// 清理所有正在使用的资源。
        /// </summary>
        /// <param name="disposing">如果应释放托管资源，为 true；否则为 false。</param>
        protected override void Dispose(bool disposing)
        {
            if (disposing && (components != null))
            {
                components.Dispose();
            }
            base.Dispose(disposing);
        }

        #region Windows 窗体设计器生成的代码

        /// <summary>
        /// 设计器支持所需的方法 - 不要
        /// 使用代码编辑器修改此方法的内容。
        /// </summary>
        private void InitializeComponent()
        {
            this.components = new System.ComponentModel.Container();
            System.ComponentModel.ComponentResourceManager resources = new System.ComponentModel.ComponentResourceManager(typeof(Main));
            this.statusStrip1 = new System.Windows.Forms.StatusStrip();
            this.toolStripStatusLabel1 = new System.Windows.Forms.ToolStripStatusLabel();
            this.tableLayoutPanel1 = new System.Windows.Forms.TableLayoutPanel();
            this.tabControl1 = new System.Windows.Forms.TabControl();
            this.tabPage1 = new System.Windows.Forms.TabPage();
            this.tableLayoutPanel2 = new System.Windows.Forms.TableLayoutPanel();
            this.tableLayoutPanel3 = new System.Windows.Forms.TableLayoutPanel();
            this.tVMap = new System.Windows.Forms.TreeView();
            this.directoryIcons = new System.Windows.Forms.ImageList(this.components);
            this.panel1 = new System.Windows.Forms.Panel();
            this.label1 = new System.Windows.Forms.Label();
            this.panel2 = new System.Windows.Forms.Panel();
            this.tabPage2 = new System.Windows.Forms.TabPage();
            this.panel4 = new System.Windows.Forms.Panel();
            this.menuStrip1 = new System.Windows.Forms.MenuStrip();
            this.设置ToolStripMenuItem = new System.Windows.Forms.ToolStripMenuItem();
            this.主接驳盒ToolStripMenuItem = new System.Windows.Forms.ToolStripMenuItem();
            this.次接驳盒维护ToolStripMenuItem = new System.Windows.Forms.ToolStripMenuItem();
            this.数据采集器维护ToolStripMenuItem = new System.Windows.Forms.ToolStripMenuItem();
            this.设备维护ToolStripMenuItem = new System.Windows.Forms.ToolStripMenuItem();
            this.帮助ToolStripMenuItem = new System.Windows.Forms.ToolStripMenuItem();
            this.关于ToolStripMenuItem = new System.Windows.Forms.ToolStripMenuItem();
            this.退出ToolStripMenuItem = new System.Windows.Forms.ToolStripMenuItem();
            this.menuNode = new System.Windows.Forms.ContextMenuStrip(this.components);
            this.刷新ToolStripMenuItem = new System.Windows.Forms.ToolStripMenuItem();
            this.删除ToolStripMenuItem = new System.Windows.Forms.ToolStripMenuItem();
            this.新增ToolStripMenuItem = new System.Windows.Forms.ToolStripMenuItem();
            this.显示ToolStripMenuItem = new System.Windows.Forms.ToolStripMenuItem();
            this.statusStrip1.SuspendLayout();
            this.tableLayoutPanel1.SuspendLayout();
            this.tabControl1.SuspendLayout();
            this.tabPage1.SuspendLayout();
            this.tableLayoutPanel2.SuspendLayout();
            this.tableLayoutPanel3.SuspendLayout();
            this.panel1.SuspendLayout();
            this.panel4.SuspendLayout();
            this.menuStrip1.SuspendLayout();
            this.menuNode.SuspendLayout();
            this.SuspendLayout();
            // 
            // statusStrip1
            // 
            this.statusStrip1.BackColor = System.Drawing.Color.White;
            this.statusStrip1.Items.AddRange(new System.Windows.Forms.ToolStripItem[] {
            this.toolStripStatusLabel1});
            this.statusStrip1.Location = new System.Drawing.Point(0, 750);
            this.statusStrip1.Name = "statusStrip1";
            this.statusStrip1.Size = new System.Drawing.Size(1169, 22);
            this.statusStrip1.TabIndex = 4;
            this.statusStrip1.Text = "statusStrip1";
            // 
            // toolStripStatusLabel1
            // 
            this.toolStripStatusLabel1.Name = "toolStripStatusLabel1";
            this.toolStripStatusLabel1.Size = new System.Drawing.Size(204, 17);
            this.toolStripStatusLabel1.Text = "欢迎使用本软件CopyRight ©山仪所";
            // 
            // tableLayoutPanel1
            // 
            this.tableLayoutPanel1.ColumnCount = 1;
            this.tableLayoutPanel1.ColumnStyles.Add(new System.Windows.Forms.ColumnStyle(System.Windows.Forms.SizeType.Percent, 100F));
            this.tableLayoutPanel1.Controls.Add(this.tabControl1, 0, 1);
            this.tableLayoutPanel1.Controls.Add(this.panel4, 0, 0);
            this.tableLayoutPanel1.Dock = System.Windows.Forms.DockStyle.Fill;
            this.tableLayoutPanel1.Location = new System.Drawing.Point(0, 0);
            this.tableLayoutPanel1.Name = "tableLayoutPanel1";
            this.tableLayoutPanel1.RowCount = 2;
            this.tableLayoutPanel1.RowStyles.Add(new System.Windows.Forms.RowStyle(System.Windows.Forms.SizeType.Percent, 15.6F));
            this.tableLayoutPanel1.RowStyles.Add(new System.Windows.Forms.RowStyle(System.Windows.Forms.SizeType.Percent, 84.4F));
            this.tableLayoutPanel1.Size = new System.Drawing.Size(1169, 750);
            this.tableLayoutPanel1.TabIndex = 5;
            // 
            // tabControl1
            // 
            this.tabControl1.Controls.Add(this.tabPage1);
            this.tabControl1.Controls.Add(this.tabPage2);
            this.tabControl1.Dock = System.Windows.Forms.DockStyle.Fill;
            this.tabControl1.Font = new System.Drawing.Font("华文仿宋", 14.25F, System.Drawing.FontStyle.Regular, System.Drawing.GraphicsUnit.Point, ((byte)(134)));
            this.tabControl1.Location = new System.Drawing.Point(3, 120);
            this.tabControl1.Name = "tabControl1";
            this.tabControl1.SelectedIndex = 0;
            this.tabControl1.Size = new System.Drawing.Size(1163, 627);
            this.tabControl1.TabIndex = 2;
            // 
            // tabPage1
            // 
            this.tabPage1.BackColor = System.Drawing.SystemColors.Control;
            this.tabPage1.Controls.Add(this.tableLayoutPanel2);
            this.tabPage1.Font = new System.Drawing.Font("宋体", 14.25F, System.Drawing.FontStyle.Regular, System.Drawing.GraphicsUnit.Point, ((byte)(134)));
            this.tabPage1.Location = new System.Drawing.Point(4, 30);
            this.tabPage1.Name = "tabPage1";
            this.tabPage1.Padding = new System.Windows.Forms.Padding(3);
            this.tabPage1.Size = new System.Drawing.Size(1155, 593);
            this.tabPage1.TabIndex = 0;
            this.tabPage1.Text = "设备管理";
            // 
            // tableLayoutPanel2
            // 
            this.tableLayoutPanel2.ColumnCount = 2;
            this.tableLayoutPanel2.ColumnStyles.Add(new System.Windows.Forms.ColumnStyle(System.Windows.Forms.SizeType.Percent, 26.97998F));
            this.tableLayoutPanel2.ColumnStyles.Add(new System.Windows.Forms.ColumnStyle(System.Windows.Forms.SizeType.Percent, 73.02002F));
            this.tableLayoutPanel2.Controls.Add(this.tableLayoutPanel3, 0, 0);
            this.tableLayoutPanel2.Controls.Add(this.panel2, 1, 0);
            this.tableLayoutPanel2.Dock = System.Windows.Forms.DockStyle.Fill;
            this.tableLayoutPanel2.Location = new System.Drawing.Point(3, 3);
            this.tableLayoutPanel2.Name = "tableLayoutPanel2";
            this.tableLayoutPanel2.RowCount = 1;
            this.tableLayoutPanel2.RowStyles.Add(new System.Windows.Forms.RowStyle(System.Windows.Forms.SizeType.Percent, 100F));
            this.tableLayoutPanel2.RowStyles.Add(new System.Windows.Forms.RowStyle(System.Windows.Forms.SizeType.Absolute, 587F));
            this.tableLayoutPanel2.Size = new System.Drawing.Size(1149, 587);
            this.tableLayoutPanel2.TabIndex = 3;
            // 
            // tableLayoutPanel3
            // 
            this.tableLayoutPanel3.ColumnCount = 1;
            this.tableLayoutPanel3.ColumnStyles.Add(new System.Windows.Forms.ColumnStyle(System.Windows.Forms.SizeType.Percent, 100F));
            this.tableLayoutPanel3.Controls.Add(this.tVMap, 0, 1);
            this.tableLayoutPanel3.Controls.Add(this.panel1, 0, 0);
            this.tableLayoutPanel3.Dock = System.Windows.Forms.DockStyle.Fill;
            this.tableLayoutPanel3.Location = new System.Drawing.Point(3, 3);
            this.tableLayoutPanel3.Name = "tableLayoutPanel3";
            this.tableLayoutPanel3.RowCount = 2;
            this.tableLayoutPanel3.RowStyles.Add(new System.Windows.Forms.RowStyle(System.Windows.Forms.SizeType.Percent, 8.897486F));
            this.tableLayoutPanel3.RowStyles.Add(new System.Windows.Forms.RowStyle(System.Windows.Forms.SizeType.Percent, 91.10252F));
            this.tableLayoutPanel3.Size = new System.Drawing.Size(303, 581);
            this.tableLayoutPanel3.TabIndex = 0;
            // 
            // tVMap
            // 
            this.tVMap.BackColor = System.Drawing.SystemColors.Control;
            this.tVMap.Dock = System.Windows.Forms.DockStyle.Fill;
            this.tVMap.Font = new System.Drawing.Font("华文仿宋", 12F, System.Drawing.FontStyle.Regular, System.Drawing.GraphicsUnit.Point, ((byte)(134)));
            this.tVMap.ImageIndex = 0;
            this.tVMap.ImageList = this.directoryIcons;
            this.tVMap.ItemHeight = 28;
            this.tVMap.Location = new System.Drawing.Point(3, 54);
            this.tVMap.Name = "tVMap";
            this.tVMap.SelectedImageIndex = 0;
            this.tVMap.Size = new System.Drawing.Size(297, 524);
            this.tVMap.TabIndex = 2;
            this.tVMap.NodeMouseClick += new System.Windows.Forms.TreeNodeMouseClickEventHandler(this.tVMap_NodeMouseClick);
            // 
            // directoryIcons
            // 
            this.directoryIcons.ImageStream = ((System.Windows.Forms.ImageListStreamer)(resources.GetObject("directoryIcons.ImageStream")));
            this.directoryIcons.TransparentColor = System.Drawing.Color.Transparent;
            this.directoryIcons.Images.SetKeyName(0, "open folder_副本.png");
            // 
            // panel1
            // 
            this.panel1.Controls.Add(this.label1);
            this.panel1.Dock = System.Windows.Forms.DockStyle.Fill;
            this.panel1.Location = new System.Drawing.Point(3, 3);
            this.panel1.Name = "panel1";
            this.panel1.Size = new System.Drawing.Size(297, 45);
            this.panel1.TabIndex = 0;
            // 
            // label1
            // 
            this.label1.AutoSize = true;
            this.label1.Font = new System.Drawing.Font("华文仿宋", 14.25F, System.Drawing.FontStyle.Regular, System.Drawing.GraphicsUnit.Point, ((byte)(134)));
            this.label1.Location = new System.Drawing.Point(36, 13);
            this.label1.Name = "label1";
            this.label1.Size = new System.Drawing.Size(181, 21);
            this.label1.TabIndex = 0;
            this.label1.Text = "海底设备网络拓扑图";
            // 
            // panel2
            // 
            this.panel2.Dock = System.Windows.Forms.DockStyle.Fill;
            this.panel2.Location = new System.Drawing.Point(312, 3);
            this.panel2.Name = "panel2";
            this.panel2.Size = new System.Drawing.Size(834, 581);
            this.panel2.TabIndex = 1;
            // 
            // tabPage2
            // 
            this.tabPage2.BackColor = System.Drawing.SystemColors.Control;
            this.tabPage2.Font = new System.Drawing.Font("宋体", 14.25F, System.Drawing.FontStyle.Regular, System.Drawing.GraphicsUnit.Point, ((byte)(134)));
            this.tabPage2.Location = new System.Drawing.Point(4, 30);
            this.tabPage2.Name = "tabPage2";
            this.tabPage2.Padding = new System.Windows.Forms.Padding(3);
            this.tabPage2.Size = new System.Drawing.Size(1155, 593);
            this.tabPage2.TabIndex = 1;
            this.tabPage2.Text = "统计分析";
            // 
            // panel4
            // 
            this.panel4.BackgroundImage = ((System.Drawing.Image)(resources.GetObject("panel4.BackgroundImage")));
            this.panel4.Controls.Add(this.menuStrip1);
            this.panel4.Dock = System.Windows.Forms.DockStyle.Fill;
            this.panel4.Location = new System.Drawing.Point(3, 3);
            this.panel4.Name = "panel4";
            this.panel4.Size = new System.Drawing.Size(1163, 111);
            this.panel4.TabIndex = 3;
            // 
            // menuStrip1
            // 
            this.menuStrip1.BackgroundImage = ((System.Drawing.Image)(resources.GetObject("menuStrip1.BackgroundImage")));
            this.menuStrip1.Items.AddRange(new System.Windows.Forms.ToolStripItem[] {
            this.设置ToolStripMenuItem,
            this.帮助ToolStripMenuItem,
            this.关于ToolStripMenuItem,
            this.退出ToolStripMenuItem});
            this.menuStrip1.Location = new System.Drawing.Point(0, 0);
            this.menuStrip1.Name = "menuStrip1";
            this.menuStrip1.Size = new System.Drawing.Size(1163, 29);
            this.menuStrip1.TabIndex = 0;
            this.menuStrip1.Text = "menuStrip1";
            // 
            // 设置ToolStripMenuItem
            // 
            this.设置ToolStripMenuItem.BackColor = System.Drawing.SystemColors.Highlight;
            this.设置ToolStripMenuItem.BackgroundImage = ((System.Drawing.Image)(resources.GetObject("设置ToolStripMenuItem.BackgroundImage")));
            this.设置ToolStripMenuItem.DropDownItems.AddRange(new System.Windows.Forms.ToolStripItem[] {
            this.主接驳盒ToolStripMenuItem,
            this.次接驳盒维护ToolStripMenuItem,
            this.数据采集器维护ToolStripMenuItem,
            this.设备维护ToolStripMenuItem});
            this.设置ToolStripMenuItem.Font = new System.Drawing.Font("微软雅黑", 12F, System.Drawing.FontStyle.Regular, System.Drawing.GraphicsUnit.Point, ((byte)(134)));
            this.设置ToolStripMenuItem.ForeColor = System.Drawing.Color.White;
            this.设置ToolStripMenuItem.Name = "设置ToolStripMenuItem";
            this.设置ToolStripMenuItem.Size = new System.Drawing.Size(102, 25);
            this.设置ToolStripMenuItem.Text = "信息表维护";
            // 
            // 主接驳盒ToolStripMenuItem
            // 
            this.主接驳盒ToolStripMenuItem.BackgroundImage = ((System.Drawing.Image)(resources.GetObject("主接驳盒ToolStripMenuItem.BackgroundImage")));
            this.主接驳盒ToolStripMenuItem.ForeColor = System.Drawing.Color.White;
            this.主接驳盒ToolStripMenuItem.Name = "主接驳盒ToolStripMenuItem";
            this.主接驳盒ToolStripMenuItem.Size = new System.Drawing.Size(192, 26);
            this.主接驳盒ToolStripMenuItem.Text = "主接驳盒维护";
            this.主接驳盒ToolStripMenuItem.Click += new System.EventHandler(this.主接驳盒ToolStripMenuItem_Click);
            // 
            // 次接驳盒维护ToolStripMenuItem
            // 
            this.次接驳盒维护ToolStripMenuItem.BackgroundImage = ((System.Drawing.Image)(resources.GetObject("次接驳盒维护ToolStripMenuItem.BackgroundImage")));
            this.次接驳盒维护ToolStripMenuItem.ForeColor = System.Drawing.Color.White;
            this.次接驳盒维护ToolStripMenuItem.Name = "次接驳盒维护ToolStripMenuItem";
            this.次接驳盒维护ToolStripMenuItem.Size = new System.Drawing.Size(192, 26);
            this.次接驳盒维护ToolStripMenuItem.Text = "次接驳盒维护";
            this.次接驳盒维护ToolStripMenuItem.Click += new System.EventHandler(this.次接驳盒维护ToolStripMenuItem_Click);
            // 
            // 数据采集器维护ToolStripMenuItem
            // 
            this.数据采集器维护ToolStripMenuItem.BackgroundImage = ((System.Drawing.Image)(resources.GetObject("数据采集器维护ToolStripMenuItem.BackgroundImage")));
            this.数据采集器维护ToolStripMenuItem.ForeColor = System.Drawing.Color.White;
            this.数据采集器维护ToolStripMenuItem.Name = "数据采集器维护ToolStripMenuItem";
            this.数据采集器维护ToolStripMenuItem.Size = new System.Drawing.Size(192, 26);
            this.数据采集器维护ToolStripMenuItem.Text = "数据采集器维护";
            this.数据采集器维护ToolStripMenuItem.Click += new System.EventHandler(this.数据采集器维护ToolStripMenuItem_Click);
            // 
            // 设备维护ToolStripMenuItem
            // 
            this.设备维护ToolStripMenuItem.BackgroundImage = ((System.Drawing.Image)(resources.GetObject("设备维护ToolStripMenuItem.BackgroundImage")));
            this.设备维护ToolStripMenuItem.ForeColor = System.Drawing.Color.White;
            this.设备维护ToolStripMenuItem.Name = "设备维护ToolStripMenuItem";
            this.设备维护ToolStripMenuItem.Size = new System.Drawing.Size(192, 26);
            this.设备维护ToolStripMenuItem.Text = "设备维护";
            this.设备维护ToolStripMenuItem.Click += new System.EventHandler(this.设备维护ToolStripMenuItem_Click);
            // 
            // 帮助ToolStripMenuItem
            // 
            this.帮助ToolStripMenuItem.Font = new System.Drawing.Font("微软雅黑", 12F, System.Drawing.FontStyle.Regular, System.Drawing.GraphicsUnit.Point, ((byte)(134)));
            this.帮助ToolStripMenuItem.ForeColor = System.Drawing.Color.White;
            this.帮助ToolStripMenuItem.Name = "帮助ToolStripMenuItem";
            this.帮助ToolStripMenuItem.Size = new System.Drawing.Size(54, 25);
            this.帮助ToolStripMenuItem.Text = "帮助";
            // 
            // 关于ToolStripMenuItem
            // 
            this.关于ToolStripMenuItem.Font = new System.Drawing.Font("微软雅黑", 12F, System.Drawing.FontStyle.Regular, System.Drawing.GraphicsUnit.Point, ((byte)(134)));
            this.关于ToolStripMenuItem.ForeColor = System.Drawing.Color.White;
            this.关于ToolStripMenuItem.Name = "关于ToolStripMenuItem";
            this.关于ToolStripMenuItem.Size = new System.Drawing.Size(54, 25);
            this.关于ToolStripMenuItem.Text = "关于";
            // 
            // 退出ToolStripMenuItem
            // 
            this.退出ToolStripMenuItem.Font = new System.Drawing.Font("微软雅黑", 12F, System.Drawing.FontStyle.Regular, System.Drawing.GraphicsUnit.Point, ((byte)(134)));
            this.退出ToolStripMenuItem.ForeColor = System.Drawing.Color.White;
            this.退出ToolStripMenuItem.Name = "退出ToolStripMenuItem";
            this.退出ToolStripMenuItem.Size = new System.Drawing.Size(54, 25);
            this.退出ToolStripMenuItem.Text = "退出";
            // 
            // menuNode
            // 
            this.menuNode.Font = new System.Drawing.Font("华文仿宋", 14.25F, System.Drawing.FontStyle.Regular, System.Drawing.GraphicsUnit.Point, ((byte)(134)));
            this.menuNode.Items.AddRange(new System.Windows.Forms.ToolStripItem[] {
            this.刷新ToolStripMenuItem,
            this.删除ToolStripMenuItem,
            this.新增ToolStripMenuItem,
            this.显示ToolStripMenuItem});
            this.menuNode.Name = "menuNode";
            this.menuNode.Size = new System.Drawing.Size(119, 108);
            // 
            // 刷新ToolStripMenuItem
            // 
            this.刷新ToolStripMenuItem.Name = "刷新ToolStripMenuItem";
            this.刷新ToolStripMenuItem.Size = new System.Drawing.Size(118, 26);
            this.刷新ToolStripMenuItem.Text = "刷新";
            this.刷新ToolStripMenuItem.Click += new System.EventHandler(this.刷新ToolStripMenuItem_Click);
            // 
            // 删除ToolStripMenuItem
            // 
            this.删除ToolStripMenuItem.Name = "删除ToolStripMenuItem";
            this.删除ToolStripMenuItem.Size = new System.Drawing.Size(118, 26);
            this.删除ToolStripMenuItem.Text = "删除";
            this.删除ToolStripMenuItem.Click += new System.EventHandler(this.删除ToolStripMenuItem_Click);
            // 
            // 新增ToolStripMenuItem
            // 
            this.新增ToolStripMenuItem.Name = "新增ToolStripMenuItem";
            this.新增ToolStripMenuItem.Size = new System.Drawing.Size(118, 26);
            this.新增ToolStripMenuItem.Text = "新增";
            this.新增ToolStripMenuItem.Click += new System.EventHandler(this.新增ToolStripMenuItem_Click);
            // 
            // 显示ToolStripMenuItem
            // 
            this.显示ToolStripMenuItem.Name = "显示ToolStripMenuItem";
            this.显示ToolStripMenuItem.Size = new System.Drawing.Size(118, 26);
            this.显示ToolStripMenuItem.Text = "显示";
            this.显示ToolStripMenuItem.Click += new System.EventHandler(this.显示ToolStripMenuItem_Click);
            // 
            // Main
            // 
            this.AutoScaleDimensions = new System.Drawing.SizeF(6F, 12F);
            this.AutoScaleMode = System.Windows.Forms.AutoScaleMode.Font;
            this.ClientSize = new System.Drawing.Size(1169, 772);
            this.Controls.Add(this.tableLayoutPanel1);
            this.Controls.Add(this.statusStrip1);
            this.FormBorderStyle = System.Windows.Forms.FormBorderStyle.FixedDialog;
            this.MainMenuStrip = this.menuStrip1;
            this.Name = "Main";
            this.StartPosition = System.Windows.Forms.FormStartPosition.CenterScreen;
            this.Text = "海底观测网设备动态管理软件V1.0";
            this.FormClosing += new System.Windows.Forms.FormClosingEventHandler(this.Main_FormClosing);
            this.Load += new System.EventHandler(this.Main_Load);
            this.statusStrip1.ResumeLayout(false);
            this.statusStrip1.PerformLayout();
            this.tableLayoutPanel1.ResumeLayout(false);
            this.tabControl1.ResumeLayout(false);
            this.tabPage1.ResumeLayout(false);
            this.tableLayoutPanel2.ResumeLayout(false);
            this.tableLayoutPanel3.ResumeLayout(false);
            this.panel1.ResumeLayout(false);
            this.panel1.PerformLayout();
            this.panel4.ResumeLayout(false);
            this.panel4.PerformLayout();
            this.menuStrip1.ResumeLayout(false);
            this.menuStrip1.PerformLayout();
            this.menuNode.ResumeLayout(false);
            this.ResumeLayout(false);
            this.PerformLayout();

        }

        #endregion

        private System.Windows.Forms.StatusStrip statusStrip1;
        private System.Windows.Forms.ToolStripStatusLabel toolStripStatusLabel1;
        private System.Windows.Forms.TableLayoutPanel tableLayoutPanel1;
        private System.Windows.Forms.ImageList directoryIcons;
        private System.Windows.Forms.TabControl tabControl1;
        private System.Windows.Forms.TabPage tabPage1;
        private System.Windows.Forms.TableLayoutPanel tableLayoutPanel2;
        private System.Windows.Forms.TableLayoutPanel tableLayoutPanel3;
        private System.Windows.Forms.Panel panel1;
        private System.Windows.Forms.Label label1;
        private System.Windows.Forms.TabPage tabPage2;
        private System.Windows.Forms.TreeView tVMap;
        private System.Windows.Forms.ContextMenuStrip menuNode;
        private System.Windows.Forms.ToolStripMenuItem 刷新ToolStripMenuItem;
        private System.Windows.Forms.ToolStripMenuItem 删除ToolStripMenuItem;
        private System.Windows.Forms.ToolStripMenuItem 新增ToolStripMenuItem;
        private System.Windows.Forms.ToolStripMenuItem 显示ToolStripMenuItem;
        private System.Windows.Forms.Panel panel4;
        private System.Windows.Forms.MenuStrip menuStrip1;
        private System.Windows.Forms.ToolStripMenuItem 设置ToolStripMenuItem;
        private System.Windows.Forms.ToolStripMenuItem 主接驳盒ToolStripMenuItem;
        private System.Windows.Forms.ToolStripMenuItem 次接驳盒维护ToolStripMenuItem;
        private System.Windows.Forms.ToolStripMenuItem 数据采集器维护ToolStripMenuItem;
        private System.Windows.Forms.ToolStripMenuItem 设备维护ToolStripMenuItem;
        private System.Windows.Forms.ToolStripMenuItem 帮助ToolStripMenuItem;
        private System.Windows.Forms.ToolStripMenuItem 关于ToolStripMenuItem;
        private System.Windows.Forms.ToolStripMenuItem 退出ToolStripMenuItem;
        private System.Windows.Forms.Panel panel2;
    }
}
