# Supplementary material
Source: MDPI journal article supplement (https://www.mdpi.com/2077-1312/10/8/1051)
Supplement: s1 [file s1 › DMS/DMS/Main.resx]

<?xml version="1.0" encoding="utf-8"?>
<root>
  <!-- 
    Microsoft ResX Schema 
    
    Version 2.0
    
    The primary goals of this format is to allow a simple XML format 
    that is mostly human readable. The generation and parsing of the 
    various data types are done through the TypeConverter classes 
    associated with the data types.
    
    Example:
    
    ... ado.net/XML headers & schema ...
    <resheader name="resmimetype">text/microsoft-resx</resheader>
    <resheader name="version">2.0</resheader>
    <resheader name="reader">System.Resources.ResXResourceReader, System.Windows.Forms, ...</resheader>
    <resheader name="writer">System.Resources.ResXResourceWriter, System.Windows.Forms, ...</resheader>
    <data name="Name1"><value>this is my long string</value><comment>this is a comment</comment></data>
    <data name="Color1" type="System.Drawing.Color, System.Drawing">Blue</data>
    <data name="Bitmap1" mimetype="application/x-microsoft.net.object.binary.base64">
        <value>[base64 mime encoded serialized .NET Framework object]</value>
    </data>
    <data name="Icon1" type="System.Drawing.Icon, System.Drawing" mimetype="application/x-microsoft.net.object.bytearray.base64">
        <value>[base64 mime encoded string representing a byte array form of the .NET Framework object]</value>
        <comment>This is a comment</comment>
    </data>
                
    There are any number of "resheader" rows that contain simple 
    name/value pairs.
    
    Each data row contains a name, and value. The row also contains a 
    type or mimetype. Type corresponds to a .NET class that support 
    text/value conversion through the TypeConverter architecture. 
    Classes that don't support this are serialized and stored with the 
    mimetype set.
    
    The mimetype is used for serialized objects, and tells the 
    ResXResourceReader how to depersist the object. This is currently not 
    extensible. For a given mimetype the value must be set accordingly:
    
    Note - application/x-microsoft.net.object.binary.base64 is the format 
    that the ResXResourceWriter will generate, however the reader can 
    read any of the formats listed below.
    
    mimetype: application/x-microsoft.net.object.binary.base64
    value   : The object must be serialized with 
            : System.Runtime.Serialization.Formatters.Binary.BinaryFormatter
            : and then encoded with base64 encoding.
    
    mimetype: application/x-microsoft.net.object.soap.base64
    value   : The object must be serialized with 
            : System.Runtime.Serialization.Formatters.Soap.SoapFormatter
            : and then encoded with base64 encoding.

    mimetype: application/x-microsoft.net.object.bytearray.base64
    value   : The object must be serialized into a byte array 
            : using a System.ComponentModel.TypeConverter
            : and then encoded with base64 encoding.
    -->
  <xsd:schema id="root" xmlns="" xmlns:xsd="http://www.w3.org/2001/XMLSchema" xmlns:msdata="urn:schemas-microsoft-com:xml-msdata">
    <xsd:import namespace="http://www.w3.org/XML/1998/namespace" />
    <xsd:element name="root" msdata:IsDataSet="true">
      <xsd:complexType>
        <xsd:choice maxOccurs="unbounded">
          <xsd:element name="metadata">
            <xsd:complexType>
              <xsd:sequence>
                <xsd:element name="value" type="xsd:string" minOccurs="0" />
              </xsd:sequence>
              <xsd:attribute name="name" use="required" type="xsd:string" />
              <xsd:attribute name="type" type="xsd:string" />
              <xsd:attribute name="mimetype" type="xsd:string" />
              <xsd:attribute ref="xml:space" />
            </xsd:complexType>
          </xsd:element>
          <xsd:element name="assembly">
            <xsd:complexType>
              <xsd:attribute name="alias" type="xsd:string" />
              <xsd:attribute name="name" type="xsd:string" />
            </xsd:complexType>
          </xsd:element>
          <xsd:element name="data">
            <xsd:complexType>
              <xsd:sequence>
                <xsd:element name="value" type="xsd:string" minOccurs="0" msdata:Ordinal="1" />
                <xsd:element name="comment" type="xsd:string" minOccurs="0" msdata:Ordinal="2" />
              </xsd:sequence>
              <xsd:attribute name="name" type="xsd:string" use="required" msdata:Ordinal="1" />
              <xsd:attribute name="type" type="xsd:string" msdata:Ordinal="3" />
              <xsd:attribute name="mimetype" type="xsd:string" msdata:Ordinal="4" />
              <xsd:attribute ref="xml:space" />
            </xsd:complexType>
          </xsd:element>
          <xsd:element name="resheader">
            <xsd:complexType>
              <xsd:sequence>
                <xsd:element name="value" type="xsd:string" minOccurs="0" msdata:Ordinal="1" />
              </xsd:sequence>
              <xsd:attribute name="name" type="xsd:string" use="required" />
            </xsd:complexType>
          </xsd:element>
        </xsd:choice>
      </xsd:complexType>
    </xsd:element>
  </xsd:schema>
  <resheader name="resmimetype">
    <value>text/microsoft-resx</value>
  </resheader>
  <resheader name="version">
    <value>2.0</value>
  </resheader>
  <resheader name="reader">
    <value>System.Resources.ResXResourceReader, System.Windows.Forms, Version=4.0.0.0, Culture=neutral, PublicKeyToken=b77a5c561934e089</value>
  </resheader>
  <resheader name="writer">
    <value>System.Resources.ResXResourceWriter, System.Windows.Forms, Version=4.0.0.0, Culture=neutral, PublicKeyToken=b77a5c561934e089</value>
  </resheader>
  <metadata name="statusStrip1.TrayLocation" type="System.Drawing.Point, System.Drawing, Version=4.0.0.0, Culture=neutral, PublicKeyToken=b03f5f7f11d50a3a">
    <value>17, 17</value>
  </metadata>
  <metadata name="directoryIcons.TrayLocation" type="System.Drawing.Point, System.Drawing, Version=4.0.0.0, Culture=neutral, PublicKeyToken=b03f5f7f11d50a3a">
    <value>138, 17</value>
  </metadata>
  <data name="directoryIcons.ImageStream" mimetype="application/x-microsoft.net.object.binary.base64">
    <value>
        AAEAAAD/////AQAAAAAAAAAMAgAAAFdTeXN0ZW0uV2luZG93cy5Gb3JtcywgVmVyc2lvbj00LjAuMC4w
        LCBDdWx0dXJlPW5ldXRyYWwsIFB1YmxpY0tleVRva2VuPWI3N2E1YzU2MTkzNGUwODkFAQAAACZTeXN0
        ZW0uV2luZG93cy5Gb3Jtcy5JbWFnZUxpc3RTdHJlYW1lcgEAAAAERGF0YQcCAgAAAAkDAAAADwMAAAAa
        CAAAAk1TRnQBSQFMAwEBAAG4AQABuAEAARABAAEQAQAE/wEJAQAI/wFCAU0BNgEEBgABNgEEAgABKAMA
        AUADAAEQAwABAQEAAQgGAAEEGAABgAIAAYADAAKAAQABgAMAAYABAAGAAQACgAIAA8ABAAHAAdwBwAEA
        AfABygGmAQABMwUAATMBAAEzAQABMwEAAjMCAAMWAQADHAEAAyIBAAMpAQADVQEAA00BAANCAQADOQEA
        AYABfAH/AQACUAH/AQABkwEAAdYBAAH/AewBzAEAAcYB1gHvAQAB1gLnAQABkAGpAa0CAAH/ATMDAAFm
        AwABmQMAAcwCAAEzAwACMwIAATMBZgIAATMBmQIAATMBzAIAATMB/wIAAWYDAAFmATMCAAJmAgABZgGZ
        AgABZgHMAgABZgH/AgABmQMAAZkBMwIAAZkBZgIAApkCAAGZAcwCAAGZAf8CAAHMAwABzAEzAgABzAFm
        AgABzAGZAgACzAIAAcwB/wIAAf8BZgIAAf8BmQIAAf8BzAEAATMB/wIAAf8BAAEzAQABMwEAAWYBAAEz
        AQABmQEAATMBAAHMAQABMwEAAf8BAAH/ATMCAAMzAQACMwFmAQACMwGZAQACMwHMAQACMwH/AQABMwFm
        AgABMwFmATMBAAEzAmYBAAEzAWYBmQEAATMBZgHMAQABMwFmAf8BAAEzAZkCAAEzAZkBMwEAATMBmQFm
        AQABMwKZAQABMwGZAcwBAAEzAZkB/wEAATMBzAIAATMBzAEzAQABMwHMAWYBAAEzAcwBmQEAATMCzAEA
        ATMBzAH/AQABMwH/ATMBAAEzAf8BZgEAATMB/wGZAQABMwH/AcwBAAEzAv8BAAFmAwABZgEAATMBAAFm
        AQABZgEAAWYBAAGZAQABZgEAAcwBAAFmAQAB/wEAAWYBMwIAAWYCMwEAAWYBMwFmAQABZgEzAZkBAAFm
        ATMBzAEAAWYBMwH/AQACZgIAAmYBMwEAA2YBAAJmAZkBAAJmAcwBAAFmAZkCAAFmAZkBMwEAAWYBmQFm
        AQABZgKZAQABZgGZAcwBAAFmAZkB/wEAAWYBzAIAAWYBzAEzAQABZgHMAZkBAAFmAswBAAFmAcwB/wEA
        AWYB/wIAAWYB/wEzAQABZgH/AZkBAAFmAf8BzAEAAcwBAAH/AQAB/wEAAcwBAAKZAgABmQEzAZkBAAGZ
        AQABmQEAAZkBAAHMAQABmQMAAZkCMwEAAZkBAAFmAQABmQEzAcwBAAGZAQAB/wEAAZkBZgIAAZkBZgEz
        AQABmQEzAWYBAAGZAWYBmQEAAZkBZgHMAQABmQEzAf8BAAKZATMBAAKZAWYBAAOZAQACmQHMAQACmQH/
        AQABmQHMAgABmQHMATMBAAFmAcwBZgEAAZkBzAGZAQABmQLMAQABmQHMAf8BAAGZAf8CAAGZAf8BMwEA
        AZkBzAFmAQABmQH/AZkBAAGZAf8BzAEAAZkC/wEAAcwDAAGZAQABMwEAAcwBAAFmAQABzAEAAZkBAAHM
        AQABzAEAAZkBMwIAAcwCMwEAAcwBMwFmAQABzAEzAZkBAAHMATMBzAEAAcwBMwH/AQABzAFmAgABzAFm
        ATMBAAGZAmYBAAHMAWYBmQEAAcwBZgHMAQABmQFmAf8BAAHMAZkCAAHMAZkBMwEAAcwBmQFmAQABzAKZ
        AQABzAGZAcwBAAHMAZkB/wEAAswCAALMATMBAALMAWYBAALMAZkBAAPMAQACzAH/AQABzAH/AgABzAH/
        ATMBAAGZAf8BZgEAAcwB/wGZAQABzAH/AcwBAAHMAv8BAAHMAQABMwEAAf8BAAFmAQAB/wEAAZkBAAHM
        ATMCAAH/AjMBAAH/ATMBZgEAAf8BMwGZAQAB/wEzAcwBAAH/ATMB/wEAAf8BZgIAAf8BZgEzAQABzAJm
        AQAB/wFmAZkBAAH/AWYBzAEAAcwBZgH/AQAB/wGZAgAB/wGZATMBAAH/AZkBZgEAAf8CmQEAAf8BmQHM
        AQAB/wGZAf8BAAH/AcwCAAH/AcwBMwEAAf8BzAFmAQAB/wHMAZkBAAH/AswBAAH/AcwB/wEAAv8BMwEA
        AcwB/wFmAQAC/wGZAQAC/wHMAQACZgH/AQABZgH/AWYBAAFmAv8BAAH/AmYBAAH/AWYB/wEAAv8BZgEA
        ASEBAAGlAQADXwEAA3cBAAOGAQADlgEAA8sBAAOyAQAD1wEAA90BAAPjAQAD6gEAA/EBAAP4AQAB8AH7
        Af8BAAGkAqABAAOAAwAB/wIAAf8DAAL/AQAB/wMAAf8BAAH/AQAC/wIAA/8BAAH/AfYB8wGZCnMBHAEa
        MAAB/wH0AbwBHAFzCVEBcwEcMAAB9AHzAQgBmQGaAnkFegGaAXkBdAFzMAAB9AIaAqACegLlAnoCoAF5
        AXQBSzAAARsBmQOgAXoC5QJ6AZoBoAGaAXkBdAFKMAABGgGZAqAC5QagAXoBdAF5AVEwAAGZC6ABeQF0
        AXkBUTAAAXMLoAF5AVIBeQFRMAABHAGZBnkBmQZ5AVEwAAEIARwCeQJYAXkBdAF5A3QBeQGZAZoBczAA
        ARsBmQGaAaACmgGgA5oEoAGaAXMwAAH0AZkBwwSgA8MBoAPDARoBczAAAfQBvATDAaACwwEaBZkBHDAA
        AfQCGgXDARoFmQEHAfAwAAH2AfMBBwTDARsBmQG8AxsD9DAAAf8B9AEbAQcEHAG8ARsE9AH2Af8wAAFC
        AU0BPgcAAT4DAAEoAwABQAMAARADAAEBAQABAQUAAYAXAAP/gQAL
</value>
  </data>
  <assembly alias="System.Drawing" name="System.Drawing, Version=4.0.0.0, Culture=neutral, PublicKeyToken=b03f5f7f11d50a3a" />
  <data name="panel4.BackgroundImage" type="System.Drawing.Bitmap, System.Drawing" mimetype="application/x-microsoft.net.object.bytearray.base64">
    <value>
        /9j/4AAQSkZJRgABAQEASABIAAD/4QAwRXhpZgAATU0AKgAAAAgAAQExAAIAAAAOAAAAGgAAAAB3d3cu
        bWVpdHUuY29tAP/bAEMAAwICAwICAwMDAwQDAwQFCAUFBAQFCgcHBggMCgwMCwoLCw0OEhANDhEOCwsQ
        FhARExQVFRUMDxcYFhQYEhQVFP/bAEMBAwQEBQQFCQUFCRQNCw0UFBQUFBQUFBQUFBQUFBQUFBQUFBQU
        FBQUFBQUFBQUFBQUFBQUFBQUFBQUFBQUFBQUFP/AABEIAH8GpAMBEQACEQEDEQH/xAAfAAABBQEBAQEB
        AQAAAAAAAAAAAQIDBAUGBwgJCgv/xAC1EAACAQMDAgQDBQUEBAAAAX0BAgMABBEFEiExQQYTUWEHInEU
        MoGRoQgjQrHBFVLR8CQzYnKCCQoWFxgZGiUmJygpKjQ1Njc4OTpDREVGR0hJSlNUVVZXWFlaY2RlZmdo
        aWpzdHV2d3h5eoOEhYaHiImKkpOUlZaXmJmaoqOkpaanqKmqsrO0tba3uLm6wsPExcbHyMnK0tPU1dbX
        2Nna4eLj5OXm5+jp6vHy8/T19vf4+fr/xAAfAQADAQEBAQEBAQEBAAAAAAAAAQIDBAUGBwgJCgv/xAC1
        EQACAQIEBAMEBwUEBAABAncAAQIDEQQFITEGEkFRB2FxEyIygQgUQpGhscEJIzNS8BVictEKFiQ04SXx
        FxgZGiYnKCkqNTY3ODk6Q0RFRkdISUpTVFVWV1hZWmNkZWZnaGlqc3R1dnd4eXqCg4SFhoeIiYqSk5SV
        lpeYmZqio6Slpqeoqaqys7S1tre4ubrCw8TFxsfIycrS09TV1tfY2dri4+Tl5ufo6ery8/T19vf4+fr/
        2gAMAwEAAhEDEQA/AOCr+kD+W3uOjJQ8c564oETgBeM0APTrQBIchgSflqWA9pAJTjgUrgDHcc0XAkiY
        gFOgbnNFwHwuGUnPtRcze4wyFTyfl9KLkkisCoPQH1rN7gOyKQCFQo3MMg9KAAeYwzmgAUHec8n2oAk3
        kUAAOWzQBLQAUARs5DEUAJv28/3qAGP+6bjvQAnC8Zq09DRbEEv3zVXKEP8Aq6LgNHSi4CHvVICCmBGy
        /MSOT7UGi2ImOWzQMjYZJwDu9aAEww6nmgCNmVDkjJPcUGi2Da38B+WgYm4k7SeaADGzigBFOZMUGb3J
        ck/KeMUCFwq8YyaAD6cD0oAQsRxQA+M5OaAHsQW4+960AN5HU80AMY7Dkd6AHFSqrk5X0oAJOWJXgUAM
        56k5WgB6BiflOF7CgCSRmQbWBzQAseSgOKDN7jWB3HigQ5cbRk7PTHegBrrIWOAFHoKAHKJNo5/WgB3P
        fk0AIZfK6c5oAXLtwDxQAbSvB5oNFsFAyRQ+3g4H1oM3uRl2WQg8+9AhWOWoAfHwDQAgwO+T/dNAC+YR
        /CB9KAJFLMoOcUANYHPNADkztGKAFePcFPWgBWJQ4qGwEBJ5ougDgffGR2ouAIcFgTzRcAQ5LKaLgOiG
        3ii4D2PzUXAjdjEcn7rUXAcQqhdp/wCAmi4Ds/PyAvsKLgKx+Y0XATn3ouAAHvyvpRcBMjtwKLgKI880
        XAMKv3hkUXAN6sdq8LRcBkoaPhT17UXAhMJHXrVIAxt4pgRv96gBC5U454oAjZ0Jy3JoAbkduBQAxs7s
        nlaDRbABn7o4oGHIoNFsMb7xoGMHEyntQA/+I/WgBu4etAB975ARvflT6UAIHjLnjkcGgze49sZ4GB2o
        EJ8o4I5+lAAfZBj3oAT6jHtQAhk2nFADWbccgYNBothy7gBuORQMcxBXjpQBDQAUADYwuPvUAMkzuOet
        BothtBQbnHQ4FAAJD35NAE1vG9wQsaNI56KoyTSbS1ZPK5OyNJdAuY2U3LQ2O7nFzKqtj/dzu/SuKeNo
        Q0bO6jl+Iru0YmzD8Pru5w9vdLd7hnEFheSfqIcVy/2pQTs/zX+Z6MshxcVfT8f8iw3w/ubaIm5vUtMD
        J+0WN5GB+JhxQs0oPb9P8xRyLFSV9Px/yMlvDN9K5NoYNRjUZdbOZZG/75zu/SumGNo1OtvU4KuW4mjf
        mj9xlzLLbMI50eOQcFXUgj8K7k01dHnNOLsx6nc23s/NMxe4eZiQ0CFZtzZoAKAHh3VRg4FADgSeT1oA
        XKgcoD7mgBImZ5isSnceNqjJNJtLcaTexeXR5ZpFSR0gkbpDgvKf+2aAt+YriqY2lC+tz1aGV4mva0be
        p2Hh/wCCPinxAqta+GNau4D0kaFLVT/38bP6V41XPsLT+2v1PoKPC+JqK9mdrb/sseK5oww8I3/I6HV7
        cH/0XXnviWjummvT/gncuE59WzK179m7xfp1uzL4P1tVXktBLBdAD6KVNb0uJMLPeSOepwpXirxPO9R8
        F3Wnz+RIxtZx/wAu2owvaSH6eYAp/Bq9qnmVGaUuj+Z4lfI8XQvpcxbqyn0yXybqGS3k7LIuM+49fwr0
        4zjNXi7ngzhKm7SViswYscHirIELleD1oAepdhw34ZoAcNx+U/nQArDamKAI3D7eDgUAMViBg8mgBGlG
        4ZYj2oAsGTKDGWHrQAisWUKV2j170AG0LwDuHqaAGNnJoAQrt+agADFhmgB6yBBh+R2oANxJ5PNAC42/
        N3oAjaU7jgb/AGPagByvtUEHO6gBcBeKAJIygPI5oAccGQ46UAPV9z7f7tAC7vOkOeCKAHsSwBJytS2Z
        vcmEgA+UcUroQuQ3QfN60XAMEdetFwDnpgAevei4CLCJHxuz7mi4DpZPsQ2jn6Urmi2KUj+Y5b1ouMVP
        3o29NtWgGuAGJpgN82gCNmyxNAEm8i3YYzQAnnuQFMjIg6be9AEqySADnCelAChwwzkUAA+90wP7woAm
        WHzVOJTgetAEW2TZgNmgCNlLrhjytADEl54GG9aDN7jjI2eck0CAt3PGfWg0WwxgAxI+/QMhY5JMnOel
        AB8w6nmgBCxHFABknvQAvzetABzQAZ9xQAbd/BoAjZDG2Oq0Gi2BgAu4D8KBiRktk4oAfHnYKAHRpl2N
        AEchdXIU8UANWZi+1qAJQ+3igBc7u9BD3EIYd8UEj40LnB/hoAlWQl9n96gB5bec/hQAmHP3TxQA8uyq
        oHDD71Q2BKZFkCqowaVwFkDxbfm6+9FwJQmwZzk0XATdu5p3M3uZi/eqwe5Mn7p2cdWoEJ/GaALCTptC
        Y+Yd6AHbd/B/hqWA6PEhwTikA9gI2K5HFACByO5Yf3aAFJzzt2+1FjN7joygPzjPpQKw9sOxBP3aze4h
        0NwoJygPvSAd5pJzj5PQUASKwZcjgehoAVRjLKcHvQAgbcMjge9AC80DsJznk5HpQFg34+6CBQIa8hx0
        NA7DVOVFAWDIoEMZfMY+grRbGq2ImO5s0xjaACgBr9KpAQ0wI3JU/KNufvMKDRbEcigY25ZfWgYjYzy5
        HtQBBMdnIO7NADNu2MCg0Wwiny1z/eoGDAAAAfNQA7Kj7wy3c0AIFw24LhfUdaDN7koJYZBLe5oEJtcf
        MpoAASzZbrQArPg0AAJIzQAc0AHNABzQAEEDPagBNxb5aADZn5cj5aAHBg+1R9485oAknu2mCh+O26gB
        oZxgKxI7UGb3JYpDg55NAgHTd0JoAXdu5oAKACgCNuWNAD14UZ4oAXdu47UGi2JIPLSUbxnjigYw/fP1
        oM3uNeXIVADkd6BChmWdQeeOtAEitkZPrQAxutAD0+4KAFoAerZG2gBcbeARQAm/BxQAuSec1LAXn1pA
        B+7QAioGAwPmoAXay8E5NABhqAE5GX7pxQAAbDyvmZ6A/wANAEiR/KCWLe9ABwDjNAC8dAPmoAJGZI1B
        Bz60ALG27JoAbn92475oAa7OG+U8UAKpJHzdaAGy844AH94UABXb83b+93oAiaRycq2R6mqQACSMt1pg
        RtGzksDwPegBC7SICDhv4qAIn6LtTI9aAGyZ3HjHtQAjKQm6g0Ww0TMsYKcFqBgoYKNxBNBqthrcmgBu
        S3y4oAXbt4oAjcoGORz9KAG8HoOKAEGNxwPm9aCGShynD/N6YoJF2yffzQAZJ5brQAbd/wCFAChlIyQS
        fpQANjbxwKDRbENAwoAliXeDnjFAFeTezkg4FACb2UYPPvQAhOefWg1WwcetAwB3Hb69qNgOu8H/AA21
        TxXqwsLOxnv73AZrK3IUxqf4ppD8sS/Xn2rwsdmtHCRvJ79T6TLsjxGOktND3XS/gv4V8BadeXnjXXg7
        2SxPc6NoZMYiSQ4Uu/8ArJB6kYFfD1M2xmPly0Fprqfe4fKcJgIXrWv2PffBHgzwppOl295oGgafbW8q
        eYHSJPMZe5aQ57Drmvl69fFzqqGIm3c+mhTw8KLqUor5HM/An4v6n8T9W1QTahZxWUN1cW8Omyp5N0Y0
        fCSxY4kQjg+nWuzMsB9WglG7dr3OPL8a69Rq9l2H/ET49av4P+J+o6BYxw32m6Xopv7qKSFm3TtnajSD
        O0ADPT610YPLIYnDwqSbi2+5z4zMnSqyhyppeR1baZ4I8afC/SPFnjXQ9EeO7s47ia5hg/1bv0VHX5s5
        wBz1rz/aYihXlRpTeh3KGGqYdV5x3PIdT/Z/8MfEuG4PgDxAz3sKl5PDniRGLIB2WXAli9idwr6SjmuK
        y/lWIj7r+0j56vlGDzG7p7nz14z+Fur+EtXk0y6sLrT9TQFzpl5gyOo6vDIPlmX/AHeR3FfcYPNqOKSa
        d13/AM+x+fZhkVfCtzgrpHEjOcZOR617p8qPUptwR8/rQA7bgbqAAkFMuMg9KAFj4QZPNAF+z0qW/MK4
        cJM/lQpGheWd/wC5Gg5Y/oK4sTi6WFjzTZ6eCy+tjpctNaHv/wAPf2aZP9Dl8WXy+HYLo7YNJt51F5cN
        jO2SY/dJH8CV+eY/iCpVj/ssObz6L5H6jl/D9DC61t/P9Dc0X4u+EfBGo21j4W8FxafZLeGyu76/xFKH
        DhSVJyzHqTn2rhll2IxUeavWd7X029D1o5hSoT5KVNW2u9zP+NXxk8b/AA/8ez29rqlzNo8TKGgSNcRg
        sCA0gzyyngHmt8ty/CYqi5Th7yv1OXG4/GUqyjGXuvoaPxk8ReKLi9mufDVzr1sJNQtrdv7OibylE0S7
        ohn/AJaDd1HGcVhl9DBU4WrJaJl4uvinyuC6o6D4gfFbxJ4R8UBU15tNs9PjsrCKyWMNPczTRglpUP8A
        EGwCRwoNc+GwWGqR5lB63ZdfE1YTjTubnxK+PGm+FLzRfDPjnQtN8SXMlh9o1tVCt9kcjcFQEcjHGc9R
        SwOXVq7nWwsnFdDfFYyhQ5addXZlaz+zN4d+InhLT/EPgK5bQ11OMzW+g65lrWcddqg/PEfQrmt6Gc4n
        CTdOrrbqjHFZVhcdBOyVz5c8bfDPVvB+uXGnXOnXGmapEpkbS7k7mZB1eCTpMn05HcV+iYLM6WJgnzXv
        1X69j8wzLJKuEm+RNo4VmMuGwa9w+X2JB90cAD+9QAbwOBIx/CgA3ntk+9ADGDFiTyvpQA9eV+XgUANY
        qD8wyfXFAAjsG+The1AD2dieck0AJhzyKAFw3egCNlk3Hn5fSgBC5U4xQAeYfSgB0bAngYb1oAkYMDz1
        oATkZbqV7UAG0j+dABzQA4yFVUelAC5DPksRQA5pfLOByD/EOtADkGVwp3Ofut6UASoRtGKlmb3JFkwM
        ZpWESrNhR/jRYBfM/wA5osAPwqv60APkcPEOAD/eoAqsMLyd3uaLGi2IaLDBJMEiqQEROTk8UwCgBjcE
        84oAcJSsYbqV4oAFlwBQA4tlKAFiKcIR97k0APaUbuOnSgB6ynAoAcr7SW/vUAMcbV9qAI0zuOT8vpQZ
        sc0oz8p+WgQCVW4I3kevb6UGi2I3k/iA+Vv4u9AyNkIJwSw9TQA1uQO9ADjnNADfMVeCpJoAXO7kcCgA
        5oAY7KhJIJNADlbzFDDgHsaAF5oNFsMfrzQMRZCpIoAaGDdWIPoKAJUPyjBz9aAGt940AJQA0f6ygBSS
        khNBD3JA+8bnBIPSgkkjkKAg9aABWDDj71AC72Xg8mgB6ybVDd6AFZ96hqlgS54GQAP73elYBRgdDn3N
        FgEL7eKLASxzHaKDN7lVEDQrj73rVmgiAocE80ATAg96hsBTjoB81K4Eibtozgmi4Ei7FGSPmouBHvR5
        CNpxTuZvcerhXIXoKLiHO27BouAM2w5Hei4CbdpxWb3AlQoFGRz9KQEiyYUbRxQA5SWLGgBFHGMc0APJ
        +VaAGySbW9qAE83jgYb1oAPNbvyaADzT6UAKDu5oAil9e1ACvJhcVonoBEDl0NO4DfX60XAYx56ii6AT
        n1FF0AyQ9s9PnougIm5XPc81SNFsR73UMAcCmMhUsRyeaDRbBk+ooGMklKgt1KelADFORn15oAXIoAMi
        gCRfujmghhkpyOd1BIuCvGaADmgAk+4tACDp1oAl/wCWQoAj5PQ0AJh+xoAXa33W+61ABkN93gUAGV7j
        JoAOvTpQAqRCQtntQARHHz/3OKAJlwG60APYjPWobAhcOXyDxSuBNzvTJycVaAT+CmAi4xx96gBen3+a
        AD5f4RgelQ2AUrgIv3qtAObrTAaXK8UALnPJ70APU7gEqGwHAY4zmlcAouAUXAKdzN7gcHgD5qLiDBH3
        utFwHq5AxSuAoJPOad0AZ9xRdAIJCrkUXQDmJY5ougGmQqjj3ouA7lsH2ougBpCFx1ouAxBzv9aLgTed
        kcfeouApLbcs27P8NFwCNhzwF9qLgMcgrx971ouA1A20ZOTRdALz7UXQBz7UXLWwE/L1pXKIqLgDEbet
        FwIk5JXs3OatbARHJJpgGQx2liKAFkXEagHI9aAI5CYxkn5W7UANBGNoGFoAa67RtFBothiyFVxQMXzT
        QAfO3INAEbZ3HJyaAE3bORzuoAAMcDmgCVMhRQAgA3/eI9qAHN3Ocj1oAG4WgBquVUCgBd2eSetADHKB
        jkc0AMCKz5HAoNFsPdWx8rDH1oKIMHv1oAcf9XQBCcjLnovQUAKFJICAtk4AHU0bBueu/Bj4Nal451aT
        y5DZWdqcX2phd32c9fJhB4aYjqeiZ9a+MznOIYePso7vZd/+AfeZJksqslWq6Hu2k+ONM+Heo6Vo+jaG
        dM8HzTNbvdyJmS5uupLsTkSdeH+929K+Llg6uLhKrVnzVEr26LyR9zSxUcNP2VONobNnXeMfhzf61490
        TxHpFkuo215ps2k6hbyKI/LiZd8U7s3JCtgbCO9cODxsVRlRqaNNP/NG+Mwsp14uGzVtfzE8Dz+H/hn4
        QPgm98SHxfNEGjWy0CwZ5I0ckujeXkcsTySOK2rUqmOq+2pw5Eu5FGrSwUHRb5h+m65o/hnVJNQ0v4Z3
        cNybg3MU2p31pavA5QI3lK75QFQARVTo1q8LVKl/RM5vbww8rxivvRPeeJNO8QHX3v8A4far5uuWi2V7
        PpOoWt3IYlyAFVXyDyeQM0fVatOKUanw900X9cozm70739Dqf+FgeG7/AMLHw74du4NF8QW9sIdN0zxB
        E9kBIq7VDBh8wHU4zzXJClUhV9pUTlHrbU7XVpTp8kWoml8MvhBL4K1Jdf1vUjrWvSWSx3F7ls7zzJtU
        fLs6YGM8VOLxssQvZw0iugYXCKjepUdzj/iJ4x0jxVfw+GviBoFkdEup/Lsrmxu/MvLOfdiOXjDRk5GC
        OnOeK7cNQq0KP1jDStLrfZo5q2Kp1Kvsqkfd6Pr8z5r+OnwI1j4f+IFt7gi7N2T/AGdqqKETUgBnypAO
        EuQPwkA454r7nJ84hXhydt/L/gHwWeZI6bdakt+3U8QwyEqQQQcEEYINfaHwDVnZj1kKjFAhc55ySf7t
        Bm9zX8O+H7rX7+1t7eze9uLiXybWyi4a4k9M/wAKDqzdhXm43GQwtNtuzPayzLp46olb3T6k8L+H9C+B
        Nvb32oRp4h8Us8cWoz2gH/EuhYZKxKfuIB/wJuTX5Zia+Izab9lpBbeZ+x4alh8qhGNry69kYHiDwLr3
        iX4gaDrumak3ivS77Uke21NYDJbWsJPyCJc8tH/EeMdCe1ddPEUaFCpSqQ5Wlt1OepRnXre1TconXeI/
        A3gYeM9U89L3xvrs03nS6Xo0QzG+zaxllyEhBOX6ggn2rkpYrEuiopcsfN/puzSeFoRlz/F+Qt98T08M
        2j6fNfeDfCMGFD2RD61esVGFMm0BSwHck10Ucvr12nCEpP7l/mcdbNKNLSc4ry3ZmP8AtJw7lWT4l6g5
        DbgY/DKBAexALZ+ldiyKslrhl/4Eea+IaCdva/gT2/xe07xLJL53ifwf4hmuF8qSLxLoz2E0qf3fOXcB
        9ayrZZiKK96lKP8Ahd/wO2hm1Cu7xmpPzVil458C+FvG97cX3iSPUfAM+reRFdanbyrqOk3UMeAqLMv+
        r4AwWxU4fEYvD0/ZUGpJdHpJHTUoUMTUVSb5ZPtqmX/HGg6zB480aW106+L3dzHp2g3kN/tsbe2SL926
        ygkB3ILNgcgYrChOnOnNzavu9NfuLrU5RnGNKLXmd14r8Y/D7xvcaT8MfHWqRaj4i2KkWuWi+UIL70ic
        co3v0OOfSuXDUsZhubG4WPLHt3R21MRhq/Lh60ry/U+WfjP8HNa+HfiS502/jWW+KtPa3kCbY9UgHV1X
        +GZf40HXqK++ynNaeKp76fin/kfnWeZLLDSdWmvU8gT/AFQr6s+HJIs7BQA1pCGIoATzGP3eCOtAEitu
        UEcfWgBjZDZJ+WgA4PTpQA0tID8vSgBfNYdetAD1IZQS5HsKAEkDkcfd/vd6AI0BDcksfU0APzhm5oAa
        rCMZbkHpQAolY9etAD1m+Udm9aAEYSE5zQAm2TOM80APXAUbxk0EMM+hwKCQj/1jUASJL5YOO9AEiEBR
        UNgAkw+O1K4E4ZCMkc0XAkUjHGAKLgSJtYYcg+gouAFfL+UkGi4DGQE5ouAx0QDnrRcBv2ePygy4DGi4
        FeUEEA8mi4AIWkZucAetWtgImK7cMMt3pgJkeWMcCg0Ww0sCqqy4H96gY8qAcIdw7UGb3GlX7UCH7yqq
        D1FADxN8zUAOQnaCxwD2oAcWycfwfwj0oAZhVZhIcMO696hsBCQU4G32pXAiOB98ZHarQD0B2jPJpgOJ
        LKFXjHWgCIrt6cL70ARvIQx70AORiyg5oAd83rQAfN60AGT6ig0WwZPqKBkbyFWIoAaxLYJOV9KAHHGe
        OBQaLYbvSN8kcnrQUKQBJ8vSgAflX/CgA83HAoM3uG4N0+9QSIpO/k5NADmcg+1ADlZdo3Dmgh7i/Kfu
        jBoJHx5B+brQA9hvY89KAJIWQgq38fWob1AZkMwx0pXAlb/Wmi4CN1ouA4SFRii4FWN8KBitAHZzzQBI
        nK/dAH94dalgPjcqcbtyUrAOJLSEqcL6UWAlG7HPJosAFyOKLGbJFdNoRAd7/fNAgJGeOlACdWGOfpQA
        +X5MOvO70rN7gPDZG3pSAN2zgGgB0cvNAEjSkkgcufun0oAQMG+vegCUNGI/nGfSgCLduO2gBdu3igAo
        ATcPWgBpIGSfuD73vQBXHua0WwC78U9AGOSTnp9aAI5OnNADE+7QAxxglv1oAjkl44BDeuKpGi2IcsRk
        nmmMac/N9KDRbEY/1YoGMXgmgBBwOaACgAoAerZAXtQQyVRtGMigkVugoAcc5oAbg9TytAC5T0NACY7/
        AMHpQAvX7vAoAOaAEyWO30oAAu1iKAHNkEv3XpQAmCKAFXq1ADAG7GgB2GHWgB69KlgSKpELN1GelKwD
        iwfBHTFUgCmAUAHHbhqAI2WTcef1qGgEwR160WAkT7oqkAeYRxTAGJIBNADiPMJH92gBNxAyPvt90+lS
        wJFAVRjilYBzfcosA1XKqBSsgF3Z5NMze49SNuB96gQ05zzyaABnIXGDQA1Tkc8UABIPT71AEigqoYnm
        gBQxbmgBH6LmgBzybQF7+lADVbIznFAC59xQAf8AAhQAZ9xQAZXvyaADduJUDgUASxLsUjt60ARnOTzQ
        BG3WixothKLDHRlQfm5FFgGzorsSg4NKyAhUbRirQC0wGj7zUARo7K/P3fSgBJ2VgCR8p+7QAz5h1PNA
        DOSsoH+sONp9KDRbETNk49KBkiLhcCgCNzsbI53UARupDYU4PegB275V2qCKAF3BHyAAzelAEvmFfkJ6
        UALjj2oAQEZyfuD7w9aAD7v3xkdqADJPymgBjJuYr/doAbnPNADjt2DIyfpQaLYgOM8dKChGkIwBQA4n
        cc0ARtnPWgDvPhP4BvfG3iSzsrRhBPdbn+1OPks7dP8AW3DfTO1f9o+1fP5tmEMHTtLr+fY+oyTLXi6q
        nJaL+rn0xY/GXwn8N/s2j6VZP/wi2ln7HcyRL+/tXz/x8yD/AJaRvnduHJyTX5y8uxOLjKpOX7x6p9LP
        p6o/TljqWFapUlotGdt4s8H+GNMivdd1aeNvCOqwR+fosUJZ7y8zuglttvzecc9uvB4xXBSrV3bDwX7y
        PXovU6qlKhpVb0fQ8u+M/wAeIdGePTvERuZr+Tatv4G0e4O7/Z+33CfMznjMKfia9/A5Y6qdW9odZvr/
        AIV+p83mGaU6Uvq8U5z/AJV+rM/wv8Ivjh8YI4IL3UbH4TeHp1MkGj2iC3mePufJT5z1HLtWs8zyzAP9
        xTdSXeWpzQy7NMd/vFTkj2RrH9jT4UaV4v0vwv4p+KGp6p4s1Pd9n05bhEllwMsdoDED3JrnnxNj5Lmh
        FKPodlPhrAJ8s5Ny9Trr/wD4JyeDohv0TxZ4k0a5H3ZVuFkAP0wP51yx4mxid5pSXaxvPhrCNfu24vuc
        X4t+Cfxy+EVjK9lf2nxd8KRDdJpWpw+bOEH91XO4H3Rs16NLM8DmEkq8fYz6OOi+ZwvK8wwDvhZe0XZm
        j8C/2ihqJew8PNdyXEW4XngPWpi1zGB9/wCwTv8AMSOf3MnPHBqMwyxRj7ZtSj0nHb/t5fqdWBzXnm6M
        9JdYv9D2HwV4U+Fmj+Eh42s7l7nT7eaa9vrzVj59w0xIys4dS4dDgBRjHTmvm6tbHSmsMnp5bfI+hhSo
        Je1Rz918WbP43te6Pr/ho2vw11ONre01mR/9Iiu1dRG5UcxMWZSnfI5r0HgqmXqNanP94tWvI41jFi5u
        i4+69L+Z8mfGH4d6h4I8S6lZagn/ABMtPkVLuRVwt1E/+pu19nAIYdnU+tfo2U46OIppJ3T28u6Z+X59
        ln1Sp7SK0e/kzzhfvGvoz5It2kC3M+2R/LhVTJLJ/cQdT/Qe5FY1qipQcma0aLr1VBH1B8PNAh+C/wAO
        5PG+paeZvEmqQbLKyfg2lttLqg/2mA3v3PSvynH1Z5tjJUIztFb+p+04GlSynCKpy77f8Eg8MW2j/Hrx
        Raa7pF+NE8WWdtv1uzmR4rPUrRgMyIf4doz8x5GK0q+1yqmqUoNxl8L6phSlDMZXpy1jrLs0b/iTxz4e
        8LeDp4dGlufCfw2ErxwjT2K32vTdJEs8/wCqgyPmk784rnw+Dr4uvyz96s+r2ivPzKxmY0MBQbvyw7Lr
        6Hzx4v8AjVquu2i6NpkSeGvDo/1WiaWxjQr/AH55B80jepJ5r9FwWS0sMlOa5p93+h+U47Pq+LbjTfLD
        sv18zz0auzmXY3l20fLFBtMh7D6V77p6I+alOT3dx2gaXrPjK5uLTSrG91e/kKhYrONnIOfUcCsq1alh
        o3rTUfU3w+Er4mSVGm5He+MPgv8AEj4d6DHq+v6DNb2WF835xJwehIHQjvXlYXNsDjKjpwlc9nFZHjcD
        T9pUjZGX4K+K+ueA7oS6LqLW0E/EltIPNtLgd0libK/lW2Ly3C4xctSGvdaP7zkweb4nAS5qUtF0Z9G/
        Bf4wRXryt4Vs/s+oITcX/gSaXdb3QH3p9NZv9XKBk+X0Pavz/NMpq4V/vvh6T7eUvLzP1XKM9o49av3u
        q7+hBqXws8HaM1r8QIZ5da8GlS8UJT/T7i9eXJtZzjKYOQWbpjFTHF4itH6k1af4W7o6quDpUajxf2ei
        W9/M9B0zxbpn7S2gXXgzxA1po+vup1Hw/JaMWlsXj4CMx6yoeHUcFWryalCplk44ints/wDP0PSjVhjU
        8PPtofH3j/wzd6Dq119qtRZXkNy9pf2ijiC6X723/YcfOp9zX6jl2Mjiqat8vQ/Is2wEsFWatozkX3o2
        VP3q9c8ETds+X+L1oARSS+W60AOPWgdgoCwUBYTIoEKqAljQAgG0YoAlQHbwOKAGN940AJuTHIyR1NAC
        fLJ06DpQABt1ABv28MCR2oAkQsVGSM0AMdzGTJ3XigBrzlgoNBD3FK7zj+7QSHzMPlBB70ASLyPl4FAC
        8+1S0A9elKwEqPhQKVkAu+nYCWBVZtzqAvr3osBO+0MfLOV7ZosARIJ5UjJAB5osBHLFmRvriiwEMibh
        g/w+tFgIBuLFj93tRYBk6zRsCxyDVIAAwWxTAj3biFoNVsSyLjgc4oAjSTZInp60EPccpDMx3EUEiKCR
        wcigAX7xoAlHAJAD+uf4aADvgEtQA5BjPapYDAc0rAMYHcSeVqkAhdh93he1MB6kkfN1oARwHGM5K/wm
        gCNssvK7T6CgBq8KM0ASAEKD0FADW6k9vWgBKDRbBQMjf75oAcuNox96gBjuVYgnmg0WwgZD1GTQUSea
        ojABGPSgBi5lLbTt29Se9ADVYOMgcUGbHr900EkcQPpQBKXZWXP3aAJHxM2Rwo6UEPcaJGI6ZoJJEyVB
        6UALzQA9elQ0Au8gY24H94UWAkQ5XqT7miwC7XPTpRYCVNqqA4+bvRYCrs2Dj75+6aGwDcH5FK4EinYo
        I5z1ouBZtbOSfJjAwvJJ70XAhkUidhjn0FFwJkb5RyKLgDnpRcBfN8p+Oc0XAcc5ouA/JWMbDgn71FwG
        ojKfl4FQzN7jmznnrSEJQaLYXbgbqBj1c7QycHvQZvcduD/OB1oEJ5hPrQAg3M2RwfWgCYBgPmOW9aAF
        oAjePcxNAEcgKjn7vpQAwGPH3f0oAXAfpwB0zQAxj8xLgkdqtPQtbETbgcscincoCwRcr0btRcCJkcKE
        B4bmi4ETElOTz0ouBEeTs/vc0XAMk1a2NFsMlOBzxTGMUkDgb/UHtQAwmPPdvegBCQORwKADnqT8tAEq
        NHtHFACDG/jgUATDOKhsze4c+1K4g59qLgPVQRkmi4DWGDgUXATkelFwDmnc0Wwkf+sai4x2apARPIVb
        FMBryHA4NAEwJYA0AG3Hzd6hsABLc0XQD16UXM3uKZGh5P3WpXEHmY4A4ouBIrZUGi4C8LzkfnRcBS25
        AaLgQlXJ4PFFwE5H3jzRcBcOfunii6AkThQD9/uaLgOYnaMnmi4DV6UXAXD9jgUXAdHuB+Y5FFwJCQT8
        vSi4CUXAOgouAUXAaA284PFFwHMOfmYg0XAOPXP1ouAUXAKLgSKflHSi4C8joA/rntRcBN0eNq8zfwsa
        LgMbrRcAb7tFwNPwv4T1jxheS2uh6ReaxdRRmZ4bGBpXVAQCxCg8ZIH4iuetiaOGipVpKKemrsdNDDV8
        VJxoQcmtdFcpSoIJXgliaN0Yq6OuGUjggjsa3Uk1dHO04uz3G428L0p3EOTJPy8HvRcB8suVCgHFFwI2
        BBxRcBGI24yM0XAi3IOo5ouAKRliOlFwBCNh5ouBWYcmi4CbMjNFwFbATGaLgCfcIB+c/dPpRcCIhZEw
        OGWrRotiPJP3utMYm7y+fWgBRsXgjJoAQ4P3OPWg0WxGxG446UFEbjk8cUANoAkUYXpQAtAD1cqBnlaD
        N7jt6sMqMGgkPmH3jkUAGR24FADHILcdfWg0Ww3B+6T97kmgoUlym8HGzgCgCIqVOD160AJx2+960AKm
        QSCeaAH2tsb26hgDbfMbBY/wjufwFROXLFyLhHnkorqfcf7L/gaDSPAr668I+0a5gxq68x2acRJ/wLlz
        6lq/GM9xcsRiPZ3+Fn7jkuFjhqCaW6OmuPgzoWkeLIPE7PawaFaW88mp2d6hdShUkurdNo/uEYGBiuSO
        YyqUvqq1lfQ63gVSrOsvhtqeJ/GL4uanYXulRaDZvL441uNbbwxosSZ/sSxcbUl29riYc5P3Er6TA4SF
        p1a7/dx+J/zS7eiPmMwxs044fDa1J/gjpLP9kfxv8I/hcmueDriz1T4wXt1Cb3U7yMTmzgdv3q2u/gOo
        OTIeTg15WMzj69W5J6Ul0XU9PA5R9Qo80Naj6nnn7T3h4fDvxMg1P43eINe1u1DG20K2VVvbbzUBJaYE
        YiJBJz2OAK9PJFPET5aNBOPVs87O5ww1LmrVmpHkHwZ8f6n4D8ZXep2njDTvCGpajAIp/EWs6c2pMoDZ
        IBzuUn16V9PnuWwlhlGnHVdEfJ8PZlP60/az07s/WDwd4hsvEPhXS9TsdWg120ubZGTUrbHl3Bxy4A4G
        Tnjt0r8eqQlTm4SVrdD9khKM4qUXc0pLwA4GAKyly2vLYu19D5v/AGnf2YrD4s27eJfC2zQ/iFZfvre8
        t/3YvSvIjkI/i/uv1B68V9DlWbVMDU9lPWnI+fzXKaeMp+0WlVbWPKfgN8dLrVZtSv8AVLZovFGkDyfF
        mjSJg6naodpvFTtcQn7+PvLzX0GY5fTjGNSg/wB3P4H/ACy7ej6Hi5ZmE+V0q6/eQdmu67/I958FfAG0
        l8T65rEt0svhe/mhu9MtNOuHWGaPaGDSjqXDchgcY7V89icyqexjSa99aN9T6KlgIe1dVPR7FH9r74fW
        upeDbfxYYNz6ODBfhRlpLCUhZPqY22yD/dPrWuR4udKtyXtf80YZvgoYjDySWp+fuoafJpWpXdlMcyW8
        hjJHQ46H8Rg1+zU6iqQU11PwirB05uD6HqH7Pfw5Xx9440rT7qMtp4b+0b7I4MEbYjQ+zP8AotfK8QY7
        6rh20/L5s+34XwCxFbnqL3T2LW/jpYeKvFWvaBqHh9dV0CKYWj2lwQkcTIdvmvKPuB2KqvQYB5r4+jlv
        1WjGrTqcsnrc+5nmMq1R05QvHa3kaXijQPDPw007V/DmnxyaR4cghXWPFkgm3yiNv9RpkMnUCRu3ZfrS
        pTr46cPaS5pPSPb/ABEVY4fL6NSUY2S1k/8A20+RPiD8TLz4g+Ip9X1KNEiUCCxsYsrDaQjhII1HQAYz
        6mv1XA4KlltDljrLq31Z+M4/H1swxHPbToux0nw5/Z7+IHxRSN9J8NSW9ncH59R1EmGIL7Z5P4CuLF51
        gsEveqXfW251YLh/GYyV4xaXd6I6zxn+yN4/+GdpBqUui2Piixgfzp4bR3ZWA7MODj6Vw0eIcHjL01Nx
        b7npYjhjF4Jqqo81ux9C/sv/ALSvgLWPK8KHw9Z/D/XhiNbZECw3DeiuRnPs1fG5zk+Mpr6ypurB/gfd
        ZNm+Dn/s/IqU1+J9Ma9pdj4g0q507UIVntLhSkkbjPBr46hUnRqKdN6o+yq0416bjUWjPy5/aF+GMfwk
        +I19pCWwGmXR823O44GeRiv3PJccsww95bn4JxDlv1DEtxWjPOdO1+fTbmG6s3ez1C0cSQXMMhDxsDww
        PqP1FetUowq0+StrF9DwaVWdGoqlLRo+w/hT8T7Lxjolxrl6sI0/U3j0zxjpqj93FcNgQakijGAxwHA+
        vavyzM8DUwddUl01g+tv5f8AI/ZsozSOYUPata7SX6mhqN/a/AnxBJaeGvD0914rklkuLrVtagCQSRxD
        c/2X+BDInTBycc5NYxg8xhz15pRS0S3+Z3VJfUJqNGN3fX/gFf8AaZ8NWPjbSvDvxC02DyLHxVZx2l2C
        R8lxjdbSEjjIOUJ9DW+R4ieEryw838P5dTmz7CRxmHVWK1Z8cyRyo7KcoQcEHsa/U07q6Px/YZvK8Hk0
        wJUbKigB2UHUc1LYAxG3jgUrgRK5UsMVSAQcjOKYBvwfL7NQZskWTzFwBhulBIFpYeN2VNBothjA7jn7
        vpQUPWNHUK3yI3Ix3+tBmxrkFjtXaOmKCRvB6fe70AOjlbOw8470ASHrQAUARuxjYkDfu6g9qAFjfYcA
        7h60APaUk0AJ5xTnB+agBdrn7p4oAcjsjYPWgCZJSc1DYD02hdxHzGlcCZGDKCOPai5m9xVPLUXEIqYG
        7rRcBfMb0NFwFI81eetFwK08DoAqn5W5NFwIGmbPznjpii5otg3+bxHwB1ouMZKRGQV6e1WgEMm75ySn
        uO/1pgKt0rqRIvXoBQAxZTCo680AOWSSMnaeDQAgkVBhhlqAJFlGAQP3Y+8PWgBQ5V9x/wAigBWmZiSf
        umob1ATLPzGdo75OKVwF/HFO4EbqXYg9qLgNEp3dKpATbtw5AA/vd6YAOnDbh6mgCN/nYgn7tACGdiuD
        90UAI0qrGuP9WPvCgCNpDnmg0WwZzQUGRQAnmY4oAYx3HNADlby1HvQA07FkIIyaAFbls/wdhQA6HGWw
        MCgBTjNAEiH5RQAu7cdtADHkKjZ2FBm9xY3KoBQSO+c8g4BoAkQNjnk0AL5hBx1qGzN7j1lO0cUriF80
        +lFwHiR8ccUXAcMsMnrRcCrv2nqSf7vamwJFYsMkBT6UWAkhRpGKbgFaiwEytJGpRHI29cUWAREkkTzU
        JBXrmloA7Ea8Y+fuaNAEH36NAFbGePvUaAPTIXBIzRoAByHIo0Al3Z5NQzN7iiRF4IyaQhNwY8cZ7UGi
        2HJ3oGNoM3uPVZVheVI3MSkK0gU7VJzgE++D+VK6vbqHK2r20JYj+7FMR9Cfs7fs+aP8RfCniLxD4ukm
        sNDiQxWt1HMItjKN0kuSMEKMDkEct6V8fnWcVcHWp4fC6ze6tf0XzPusgyKjj8PVxOMbjBaJ3ttu/l92
        /Y8H1WC1tNUvILC5N5YxzPHBctGYzNGGIVyv8ORg47Zr6ym5ShFzVnbVdn2PiasYRqSjTd4puz2uujsU
        XfDEVoZj0bKAmgCGTmQ45+lACGRUXBBzQAkbpkFhuUn7tAH1n+1V8IvC1z4Fg8f+DjY2sVnHBDeW1mV8
        uSJyqRsAvRwSoPqP93n4DIMxxMcQ8Diru92m+61fy/rqfqPEeV4SWFWPwVko2TS2aei26/p6HyHjbxX6
        JY/MyN32sf50WAiaT5jxRYCNiSc0WATy93NFgGMjhjg8VSNFsd14L+Bvjr4iWyT6L4Yvby0I3LeSgQW5
        HciWQqpx7E15mKzTBYN8taok+27+5XZ6+FynG41c1Ck2u+y+92R1+pfsb/FOw00XkWh2+oxlN5SyvopH
        Ax2G4bj/ALufavNhxHls5cjm16p/1956c+GczhHnUE/Rr+vuPEZIJbWSSGaNopo2KPG4wysDggg9CDX0
        qakrrY+YacW09yOQEDL8qfuimSEf3BQA9N/L7DsBALY4B7D9DSv0HZ7kmc9eKYiRTx1FSyGOXq1KxJ67
        rH7NusaR8GLP4j/2zp0mmTQxzNaNvWZd7hAq/LhjkjPI7189SzilUxzwHI+ZNq+ltFc+lq5FWpZfHMed
        crSdtb6ux5Fg19DY+aE5osAbd/HpRYBN2ecgUWNFsEQklm2Ro0rscBVGST9KTsldlJNuyLD6de28PmTW
        k8SDqzxsoH4kURnGTsmW6c4q7TKjjzGx/drQzHq2VB/nQAufcUAMYOWODxUsDUg8MazLoEmuJpd5Jo8U
        vkSagsDGBJMA7C+NoPI4z3Fc7rUlUVFyXM9bX1t6HQqFV0nWUHyLS9tL+pRTlhW9jke51njv4X+J/h0d
        O/4SLSZtNXUIBcWzPghlOMgkdGGRlTyMjI5rgwuNw+N5vYTvyuz/AK7eZ3YvL8TgeX6xDl5ldf137rc5
        TO7mu+x54UWAMp3GTRYCzpNjc6xqVtp9hA91eXUqwwwRjLSOxwqgepJFZzlGnFzm7Jas0p05VZqnBXb0
        S8zU8b+B9e+HniK40TX7NtP1GEKzRFgwZWGQysCQwPqD6jqDXPhcTRxlJVqErxZ0YvCVsDVdDERtJEfh
        fwVr3jW8NroekXur3KgFks4Gk2D1YgfKPc8VdfEUcNHmrzUV5uxOHwtfFS5KEHJ+SuetaZ+xd8U9Q09r
        ptMs7BgMpbXV6glb8FyB+JFfPT4ky2EuVSb80nY+kp8K5nOHM4JeTav+v4nj+t6Ff+GdYvNJ1S3NrqNl
        K0E8JYMUdTgjIJB+oNfSUqkK9ONWm7xeqPl61GeHqSpVVaUXZozXGDmtrGI9fuiiwC0WA6T4d+AdW+Jv
        i6x8P6NF5l3ct80jfchjH3pHPZQPz4A5IFcWMxVLA0JV6r0X4vsjvwOCq5hXjh6K1f4Lq36Ht3jz9h7x
        r4fvVXwzJB4osWUHeXjtZVPcFXfb9CGP0FfMYTijB1Y/7ReD+bX4L9D6vG8I42jL/ZrVI/JP7m/1PLfF
        nwL8e+B9Mm1HWvDF5Z2EODJcjbJGgJwCzISBzgc+o9a97D5pgsVNU6NVNvpt+Z87icnx+Eg6lek1Fdd1
        +BwbY+XBJP8Ad7V61jxxxPPIC+wosA0lTwPvUWAXkdTzRYCNvvGiwDo+hosAq9KLAamseGNW8PW9jPqe
        m3WnwX8K3FrLcQsiTxkAhkJGGGCOnrWFOtSrOUack3F2dns/M6KuHrUFGVWDSkrq63XkZfmn7vYVvY5x
        QOKLALtPpS0ASjQD6u/YGshFrHjbWJBiO0s4Iix9GZ3P/oqvgeLZXhQpLq3+Fl+p+kcGQtUr1n0SX33f
        6HyxNO91NJNK2+SRi7MepJOSa+9UVFJI/OJNybb6jcn2p6CE34o0ACzvwDgDpmjQADs3LHmjQDtvg/8A
        Cu9+Lvji10S0zBDgzXl2VytvCPvOffkADuSPrXl5jj6eXYd1p6vZLuz1sry6pmeJVCGi3b7Lv/l5mh4q
        +Ey3HxJ1Lw14BmuPGltbnKXFpFu2jHIZh8vynjfwpPT0rLD5glhI4jHJU2+j/q+vbc2xGW82Mnhsvbqp
        dUvze2nfYl+B/wAF5/iprsst3J/ZnhTTB5+q6nKwRI4xyUVjxuIB56KMk9gYzXMo5fTSguapLSK8+/p+
        explGVSzKq3N8tKOspdl29fy3N7416bH8S7y41v4feA5NP8ABWg2xgfVrW0MSXSp1lbpkKB7tjlvQceW
        SeCiqOOr3qzd+Vu9r9P60vt592bU1j5Ovl+HtRpq3Mla9uvy++2r8vDm+7X1Nj5Ejb7lFgIsGiwCc+1F
        gEftVI0Wwj/eNMY14h5Ltnk9qAGKcN+VABLzQaLYgI5oKDc465K0AeueKf2a9e8IfCLTviHqOoadFYXy
        QyJpzyMtziU/uwoK4Y7fmIByBn0NfP0M6oYjGywUIu6vr003/wAj6HEZJXw+BjjpyVnbTrrt/mcj8MPB
        M/xG8daH4ahZlfUbpIndeqR9ZHH+6gY/hXpY3ErB4aeIf2V+PT72eZgcK8biaeHj9p/h1+5HYftQeHfC
        Pg74r3mgeD7BrGy06CKG5BneYPcEbmILkkYDKCM9Q1edkdbFYnBqtipXcm7aJafL+rHpZ7RwuGxjoYSN
        lFJPVvX5/wBXPJm+7XvnzbGr0oFYlT7tAiSzsbjVL+CztIXuLq4kWKKGMZZ3Y4VQO5JIFTKUYRc5OyRp
        CEpyUIq7eh638Yv2WvF3wb0aDWb5rXUdHYRrLdWr828rD7jqeeuQGGQeOmcV8/l2e4XMZulC6lro+q7r
        /I+kzHIcVllNVZ2cdLtdG+j/AMzxzqj96+iPnT7h/bvs9A0vwF4dlj0Swi13UL0E6hHbIk3lJEdy7wAS
        CXTgnHFfmPCsq08TUTm+SK2vpdv/AIDP1DiyNCGGptQXPJ72V7Jf8FHw+y+Yd3rX6cfl5EwwxFADSuCG
        oA6XwJoMniXxBFYw/wCtvpYrJMDnMrhCfwXca8fNK3sMO5HuZPQVfEpM/QLxR4qb4e6npOiaboEmpQNA
        qRRwuI1ijQhSzMeiqB0xkkjFfj1PDvFqVaT1P2eWIjQqQoQ2sVPjbq1pHZ6dot65j0hopNa1lQcFrG2A
        fyj/ANdJNie/NVl9BzcpxXvN8q9Wc2PxCp00r+b9EeSfsTeF3+IPi/xj8dvFpjVnuJbfTnnIEduoH72Q
        Z4AVdqA9gDXv5/iVThSy3D7RSv6nj5Fh1Uc8fVWsnp5I7f8AaQ/bJ8PeH/hZHN4B1f8AtvUPEEtzpun6
        xpbK8NnNEB5jsx4JXPQZ5rx8rymrjcV7OUdI7nqZrmcMDhnUW5+eeueJdY8Waj/aOu6nca1qflrE17eE
        NKyjoCQBkda/acJhKGCjyUY2PxDG42tjpc9eV2Uln28AZruXLHZannNNq9z6G/Yv+OkXww8a3mi+JPEk
        umeCZbCaaG2nObaC5BDEjuCwzgDgmvzziTKJVlGth4+9fU/S+G84VJOliJe6fT/w9/bR+HnxQ8aL4Y02
        TU7C/uWZbGXUbfyor0jkqh7HAyAetfD4jJ8XhqaqzWh93QzfCYuo6VFjv2kfj1efBPRfC1/Yw2l3Jqet
        w2NxbXOdxtiQJXTHO5cjnpXLl2F+uucYbJX8joxmLhhXTVT4pHiH7WFg/wAIfjD4W+Lvh+MLFezi31SF
        R8srhR94ekkRIPqRX1eQ11isPVy6s7vp/wAA+Vz6g8NWhmNL0Z9R/APxGtroWr+H7BvttpYImo6MGb79
        hcL5kKZ/2Duj/wCAivm8fRfPGpJ2bupeqPo8vqqVLlT816M1vCXivUfihb69pHiLRE03TNQSe3s4nJLy
        24/dszZ/vEkgemKwr0Y4fknSldrc2o13Wk6dRb7H5y/ELQrrSNXhhlz9piDWEuTy0kDtESfcqqH8a/Y8
        tqqpR06a/efi+dUHTxTa6n07+y5pzeGfAfifxU2n3OpO90tjDDZhfNaCBdrFdxAxvyTzX57nsvrGJjTv
        pv5H6VkUfqeC9pby8zY8L+JrbxD8QRFrOjafLbaNZTazdX6WTWE8ES5CRTRklZQ2e3HGa5Z0Z06Cs/j0
        Wt18ux1KopV22rpanz7+0l40ux4d0TRrhxHqOvyN4o1YA8lpTi2iPskeMCvteHsLBOdd7R91fq/vPhOJ
        cXPkjQT+L3n6dDxLw74ov/CetQX+l3MMN7CMJJLEsgB9cMCM19jXoLFQdOroj4bD16mGn7Smrn0b4D/4
        KDeNfDlxHD4jsLDxHp6kKxgUW86j2x8pP4V8XiuEcNUvKhO0j7rCcW4mm1HEQuj7H+Fn7RHgz4xaLNea
        FqAFxbR77rTrgbbiAY5yv8Q9xX55jMqxWAqctSN9dH0P0jA5phsdT5qTt5Hx5+2H/wAIJrFydZ8M2Gq2
        GspKouLpLB4LQnPDBzjDZ9OtffcPPE3eHxElyvzuz894jjhoyWIoxfMn2PWv2Tfjz4i+Ivhe/HiHVLSc
        aKkVmkUaETzccTSsfbjArw89yujgqyVJaSPouHsyr4+m1Wex5t+3ne22qr4XvkZfOJkhc9yByP617vC9
        N03OC2PB4v5ZRhJHyS0uyUSbl5GcV99GfLq+h+ZcvMuU9N/Z78WW/hv4l2un6g4fQtfjbSNQiJ+UxS8I
        x/3Wwa8LPMJ7TCucfjjqj6PIcU6OLUH8MtD621G7uB4R0nxFqttY67q/h0XPhq80/WLkpBI8bELLGuDm
        R0APbINfmlOE/aujRuoytK67H6tUnH2PtppNr3X6ljQNdPxu/Z38Z+H/ALBpenXOmW3n6faaXlVgCjfG
        Ch5DAqRkcc0VqMsBjqc1K/M92a0KscZhZ030R8T+J7dIdXaWPiK5jjuVBPTegYj8CSK/WsNU9pTTPxzG
        Ufq9eVMyQfnNdJxC5HmHmgB5+8tSwHNgSktyD0pWAZJnecnJqkA3zCp55X0pgMYAkuo69qDNjllyooJB
        TliaDVbCk/vDQMlHSgzYx/vmgVhuc/dIB780CDKnHOwdsd6AB1f5eNvtQApcrwetBYpZCnI5oIGrjHHS
        gA+Ynhhj60AG8rwTzQBIsjFRs60AClwxeQ528UASAKG4YgVLAlEoXgHPvSsBIkhBzg4osQ9x7HJzRYkV
        HcHg8fWiwDzKc8nJosA0Snf70tAEcvLIYweGo0AryWrPIflLH2GaehotiB1MLYA60WGBG1MVYCA+XGPe
        gBAnlrnNADGbc2aAE8zbxQAomXvyaAHrNwMdKAF800AJ5pzUtAHnL3BJpWAXY0nzINwPZu1FgEdzGAu7
        djvRYBxbdzVIApgIXKj2HegBQykZK5P0oAjfG44HFA7ETj5jQFhdwZVUDB9aC1sI6lWIJyaChtABkpyO
        c0AGADjfg+goAYw54OR6mgBOfUUAPVyBigBTLj/9dABndzQBIn3BQAK+JlFADickmgzY9SNo5oJFyv8A
        FyO1ACpIYie5PpQA5AdmB98/dPpUsze41nw2AKVhCpLg0WAnzu5osBIpjC/M7KfQUWAr8gelF0aiNyF7
        0XAkX71FwJA7h+DgUrgPklkQdc5qHuAxXZRg9aQEyHctBm9xaBAnVqAHI2xAaAHBzIN3rQA9Tx1oAX7g
        8zPK0AGc8+vNABQB9qfsm6T4U8ffArXPCF2YZby6uZTf2xI84BgojlUdcLhcHsymvzPiCpicJmMMVHZJ
        WfTzX+fkfrPDVLCY3K6mDna7b5l16Wfy6eZ83fCf4P6l8UfiCPD1mStnbyE31+nKQwq2C3pk4wo7k+gJ
        H2uYZjTwGG9vPd7Lu/63Pz7Lcqq5ljPq8Nlu+y/4PQ+zdRT4U+OfDf8Awr638WQ6fpWhuI7jTrS9W3Eo
        j/hd3X94ob5iUP3hknIr81g8zwtX69KleU9m1e1+yWz7X6bH6xUWUYyj/Z0a3LCnvFNK9u7e66uz33PM
        vGHxi+DPwhsptL8FeFNL8TaoFKGfyRLCvGPnuH3NIPZSQeeRXuYfLs2zGSqYuq4R7Xs//AVZL5/cfPYr
        NckyuDpYGjGpLva6+cndv5aeZ8fOxkZn2gZOcKMAV+irQ/K3qBBCZP3fSg0Ww0SKBhBg0DOs+GHw21b4
        seLYdA0mS3hvJI3lM12zLGiKMkkqCfQcDqa4MdjaeX0XXq3t5bnpZfgKuZV1h6LSb1120+8+g9H/AGA9
        VlcHVvF1nbID92ztHmJ/FmTH5GvkKnFtNfwqTfq7f5n3FLgqq/4tZL0Tf52N2X4DfAj4W7v+Es8UnUbp
        OZLW5v8ADcf9MYAJMfXNcqzfOsd/utKy7pfrLQ7Xk2Q5d/vdbmfZy/SOpyfxU+InwAvvh3q2h+G9CVNT
        eImyvbPS/KkSYcoWlfD7c8HOeCeK78BhM7hioVsRU93qnK+nXRaHnZjjsgnhJ0MNT962jUbO/TV627ny
        mRldn96vvbn5yRscpRcCE5p3NFseo/Dr9mj4hfE1Y59N0ZrHTnGV1DU2MELDsVyCzj3VSK8LGZ3gcFpO
        d5dlq/8AJfNn0OCyLH4/3qcLR7vRf5v5Jl/4t/sweJ/g9a6Xc6pqOlXtvqN0tnD9ilcyCQgnlGReODyM
        9s4yKzy/PMNmLlGnFpxV9bbeqbNsxyHE5YoSqyi1J2Vr3v6NI+gf2iNE1/4n/EbQPg54Z1KHR9JtNHF9
        OJWZY5SpKojhQcqoRMDGMsTzgV8hlFWjgcLUzXER5pOVl+rXrd/cfZZzSr4/F08ow0uWKjd9n2Tt2svv
        LP7DmpX2l/DzxtpNzIXk0bUXKRltyxsY/mC+26Mn8Se9TxPCE8TRqRXxr9f+CXwpOdPC16Un8Ev0/wCA
        fBrH7Q5llkZtxLOWOSxPUmv1RK2iPyVtt3Y3p8ucjsaYhSMLgc49KAPrj9nfT/hz8Rv2fdT8AaxrFpo/
        iK4vZL0vcSCORZQAIpULYDgKMFQScb+mc1+fZvPH4PMo42lBygklpqrdU+3r6H6Nk0MvxuWSwNWajNtv
        XR36NX39PU4vwn+zbodp8LdT+IXjbxDcw6NaXEtvFaaNGjy3JSYwgpI2V+ZwQPlIxyTXqYjOa0sZHA4S
        mnJpO8tldX1S7Lz8jysPklGOClj8ZUagm1aNruzto3pq/LzO6/Z8+FXwg+N1nremnwxq2ia1ppQuZ9Ve
        WVkJI3AhUUHI5BTjIxXk5vjs0yyUKntYyjLtGy/Nv01PWybL8qzWM6fspRnHvK7t9yXrofMXjHTLPRfF
        ut6fpss02n2l7Nb28lxjzHjVyqlsYGSB2Ffb4apOpRhOppJpN27tHwWKpwpV506bvFNpX3smfXXjAk/s
        B6Rnn93bf+lVfn+G/wCSjn8//ST9GxP/ACTEPl/6UfFzMQa/SLn5eJknvTuB9Mfs5fsv+Hfin4DuvFni
        XW72wtLe6liaK1McSLHGisztI4bA5OeBgDrXxWc57XwOIWGw8E20t7vV9LI+6yTIMPmGGeKxE2km9rLR
        Ja3dya++J/wO8CTzWvg34Yt40uYAS99qpLRMB/GBIJDjp/AgqI4LOMUlLF4n2afSO/ppb82aSx+S4RuO
        DwvtGustvXW/5IwZv2z/ABmCIPDWi+H/AAxA3yxxadp4L9sD5iQe3RRXUuHMI/exE5Tfm/6/M45cUYxe
        7h4RgvKP9fkekfs8ftTeNPFPxXtPCHjTybq31JJIV32qwSW8qoXGQAMhgpXBHcHPUHxs4yPCUMG8ThNH
        Gz3umr2PcyXP8ZiMasLjNVK62s07X/Eqft/aJoWhJ4R/s/RbCy1C+kupJ7u2t1jkdUEQCsVA3cuTznGP
        etOE6tar7Xnm3FWsm773/wAjLjClQpex9nBKUr3aVnpb/M+PpP8AVLX6Hc/Nhr9FouB1Xw28A6p8TfGO
        m+HNKXN1eSYaUjKwxjl5G9lGT79ByRXFjMZTwVCVepsvxfRHdgsHUx+Ijh6W7/BdX8j7L+NWuyfDbwRY
        fBf4Z6RLq+u3enuLqOGHzXhtSD5kjjGPMkJbk9M9srX5xltNY3ESzbMJ8sE9NbXfRLyX9dT9PzSq8Dh4
        5Pl0OabjrZXsurfm/wCuh41+yV8H7bWdUvvH3ilBb+FvDIec+ep2yzxrvJI7rGBuPqdo55FfSZ/mUqcI
        4LDa1Kmnonp+O33nzHDuWxqzljsTpTp669WtfuW/3H0h8M/iRpH7VkXiWz1fwZC3hTTpY1tZ79xI8sh3
        ZOABsYKAflYkbsZOa+MxuDqZC6c6Vb95K97dP816o+2wGOpcQqrCrQ/dxtZvW71+527PS58R/G3TfCGk
        fEnVrPwPNLNoMLhFMjl0Eg++sbHlkB4BPX1IwT+nZZUxVTCwnjF77/LpfzPyrNYYSni5wwTvBfn1s+qO
        CbOa9W55A5fujNFzN7nb/Bfxrp3w3+J3h7xNqdlLf2VhK7ywQBS53RsgZdxAJUsGAJH3eory8zw08bhK
        mHpuzl/mn+Ox6uVYungcbTxNWN4x6L0a/Dc91/a3+KXw3+LHgjQdT0K+Nz4miuNixmBkljtyrF0lyMYD
        bSOTyTjgk18tw/gcfl+IqU60bU2u+l+lvlv+J9fxJmOXZlhqdWhK9RPtrbrf52t+HU2f2Y/EN54P/ZV+
        Imuabsiv7S7uZIJ9gOHFtDtPPXaTnB4/OubO6UMTnGHo1Nmldf8Abz/M6sgrzwuSYmvT0km7P/t1fkaf
        7HvjPWZPAPxM8Sarqt3q81sRcgXcrSkOkMjseSTz8v5CseIsNS+s4bD0oqKemmm7SN+GMXW+q4rE1ZuT
        Wurvsmz4xu7ue/vri7urh7q6uJGmlmkOWd2OWYn1JJNfpMVGEVGKskflk5yqSc5u7erGMcHLnK9hVXIE
        ouAqhWYDaWY8AAdaLgfo5+y18D0+E/ghL2/gCeJ9VjWS6LjJtk6pAPTHBb1b12ivxvPs0eYYjkg/3cdv
        Pu/8vI/c+HcoWW4bnqL95PfyXRf5+fojkfgFovxUf41+KdU8eXmox6faQSRbJHZbGZ2cbDAv3CgVWOQM
        jIzyTXfm1XLVgKVPBRXM3/28tNb9b3/4B5uTUs0eY1quPk+VJrryu70strJf8E8C/aj+O158T/Gt5pmm
        ahL/AMInYN5MEMUhEV06n5pmA+9k5256KARgk19bkWVwwNBVKkf3ktX3Xl/n5nxnEOcTzDEyp0pfuo6J
        dH5+fl5HiKn5RX1Fz5EY33jRcBMY5ouBPYC3lvrcXbvHaGRRM8Yyypn5iB64zUzclF8u/QuHK5Ln26+h
        986P+zF8FPBMNrdatdRagJkEkE2t6qqJICMhgqlFYEeoIr8nqZ5m+KbjSVrb8sf87s/ZaXD+S4RKVV3v
        tzS/ysmeA/tS+Lfhne/2b4f+H+jaZG9nM0t3q2m26RpJlcCJXAzIOck5wMDGecfWZFQzCPNXx03qtIt/
        jbofGcRYnLZ8uHy+Efdd3JJL5X6/1Y8M0TSpda1WwsLbm4vJ47eMerOwUfqa+qqVFShKpLZK/wBx8fSp
        utUjTju2l959aft46hHofhnwJ4TtRizi8yfZ6CJEij/R3r894Vi6tavipbuy+9tv8kfpfGE1Ro4fCQ2V
        39ySX5s+QARgY6V+jXPy8DLt4ouBNGyMh3Eg9xUMD2L4f/soeNfiP4T07xDpE+kJpl8GMX2m5dXG12Q5
        AQ91PrXzWLz/AAmDrSoVFLmj2XlfufV4LhvG4+hHEUnHll3b727H1p8AP2f5/hX8P9d0XWb6G51DWnYX
        E+nMwWOMx7FVGZQSRlzkjv045+BzbN1j8TTrUo2UNr9736fI/SclyWWXYSpQrSvKe7Xa1tLr16FCD4df
        Ab4NyKmoDQotQiIJ/ti6W5uM9m8ticduQorZ43Osy1p83K/5VZfev8zFYHIcrdqnLzL+Z3f3P9EfK/7U
        Ufgefx/DqXgW9tLmzv7YTXcViMRRTbiDgAALuABI9ee9fdZG8YsM6eMi04uyvu0fnXESwLxSqYGSakru
        2yf/AAf63PI4kjkiIdsEdq+iPliMAScA5C9M0AavhXwvd+MfEVlpNk0MdzdPsV7mURxoMZLMx6AAE/hx
        k1z168cPSlVnsu2rOnDYeeKqxo07XffRfNn1z4c1j4OfBbQf+FfX2sSa7ea6Ui1rVNMkIiTPRXlRwVjG
        SNqknBbd1Nfn1anmuZ1Pr0Icqh8Ke/yTWr835WP0zD1cmyml/Z8587qfHKO3zaei8lfrctfF3Ttbj1ez
        +EvwpttI0DTb/Sm1KeW2mEct2u5lMZcZPIAOTywP3sAg55fOk4PM8ycpyjLlV1ovO39W7XNczp11UjlO
        VKMIyjzOzs35X/q/exzvwt+POn+DvEUPwz8V+FdK8K+FbaOS0vI7vNyzXIwd8zH5WDEHJ2kfMvOBXdjs
        pqYmk8xw1WU6js1bTTsuunr+Jw5dnNPC1llmLoxp0ldO+vvd29nf07dDy349/tAeJPFniTWvD2m63HB4
        Nt55La0tdIHlQTwA4UsRy4IxkZ2+gr3MpynD4elCvUheq0m3LVp/p+Z8/nOdYnE1amHpVLUU2ko6Jr9f
        yPE2619Pc+TIn++aLgbvgXwzH408X6PoMl/Hpi6jcpai7lTcsbMcLkZGckgde9cuKxDw1CdZR5uVXsd+
        DoLFV4UHLl5na/qfZnhX9gHwrpzLJr+v6jrTjny7ZFtYj7EfO35MK/N8RxbiZ6UIKPrq/wBF+B+pYfg7
        Cw1r1HL00X6v8TgdV+C/w2+K3xyHgfwXN/wj9hounyyajeW5e4N1OsiKY0MjnlQ3L88gjBxmvWp5nj8B
        l/1zFrnc2rJ2Vk03d2XXsePUyvLswzH6lg3yKEXzNXd2mlZXfTudh8NvBvwXs/i7c/DvT/B93r+rWCS/
        a9X1giaINGBuGzO3GTjOxefUYNedjcTm0sEsdOsoRla0Y6PXz3/F6HpYHC5PHHPL6dFzlG95S1Wnlt+C
        1LiT28f7TCfDzVPhj4bt/BuoRyjT5X0SJS4jgMjSo+NrZYFSAOMr0PXJ8zyr69TxM3Vja/vPq7Wa9PvN
        U4rN/qFXCwVKV+X3F0V7p7b/AHHgX7ZHhPwn4J+KUGk+FdLj0sLYpNexwuxjMrsxACkkL8gU4GBz0r6r
        h3E4nE4R1MTLm1svRf8ABPkeJcPhcLjFSw0OXS79X+Wh4V0jFfU3PllsR0XKPrP4ffsDa7d6ppl/4i8Q
        aSdELRzyQ6a0ssk8XDFAWRAu4cbhnGc818Hi+K6MYShQpy5tVrZWf3s/QMHwlWlOM8RUjyaPS7uvuR9A
        /tJ/Czwb408LWF34x8QXnh3QNCjllSCxmiiSRioCgB0bcwC4VRz8xA618lk2OxWGrSjhaanOdt7v8mvm
        z7DOsBhMTRjLFVHCEL7WX5p/JHzP+w94ehstf8UePr+Nl0rw3pkpWRuzspZsH1EaPn/fFfbcT1nKlSwU
        PiqSX9fe19x8PwvRUatXGzXu04v+vuT+88H1k63401TVfEctjdXLXtzLdXFxFCzRh3Ys3zAYHJr6ul7H
        DQjQUkrJJK/Y+Sq+2xM54hxb5m23buc433jXSzkEpXACfL5H8VFwPqT9hP4RjxL4yuvGV/AH07RD5dpv
        GVe7Ydf+AKc+xdD2r4fijMPY0FhYP3p7/wCH/gv8mfd8KZf7eu8XNe7Db/F/wF+aJv2qfHF98cfjNpHw
        68NXH2mxs7hbUCJ8xS3bf6yRsdRGvy57bZPWpyLDQyvAzx1dWbV/Pl6L5/5FZ9ip5pj4YDDu6Tt5OT3f
        y/DUf8Tf2Dde0rXNN/4Qac6xpU4VLk308cUtqw+85zgMh6jaCR0wepWC4qozpy+trlktrJtP/g+uhWO4
        TrU6kfqb5ove7Sa/zXpqfR37Q/7O6fHuHQIm146HHpTTttW08/zfMCAfxrtxs9857V8flGbvKnUfJzc1
        utrWv5PufZZxkyzZU17Tl5b9L3vbzXY/OHx34QvfAHjDV/DmogC7064aB2Xo4H3XHsykMPYiv2HC4mGL
        owrw2kr/ANeh+MYvDTwdedCpvF2/4PzOfZcMQK6rnKJsB78/Wi4HtH7KukC8+LPhfep8v+0HlzjgmKBm
        A/NxXyfEM+XDSXkfbcL0ufFKTPqzVH8P6t8Vo7RtB1B/EiX8Zi1p0JihjUcqjK3A7YK9Sc1+e041KFH2
        ia5WtvM/Q5TozxHIl71zyP8AbO8RSWmhfEWSN9rSnTfD0TD+BTmeUfj8ua9/h7DqdSkpdLyf5I8DPa/s
        41HH0+RwvgLxl8YPGP7N1v4F+HXw8t4PC7WMun3XiDUrlYzdSOzea0QYgEHcRk1njcPg6ePnVxE3du6t
        09TbA18VPBQhh42supb+LngPxz4s+Cnhfwpb/CrTPBkPhl1u57211a1W2bbHtkYIDn5uvNTlmLoYPGyr
        +1fLLfTU0zTDV8dgfZuK5vU+eNB8GWQ0O41vxPd6tp1pHIY4dK03TJJb65/6afMoWOL/AGyea+yxOcqp
        VVPDta9XsfF4TIbUnVxC26It6N4Y8I+OLW5HhzUNf0jUIkZ4hrdobiyuiB/qxPED5bnsDxWc8zxWDmvb
        2afZ6miynC4ynzUbp+ZZ8Jfs6fEfx7o8epaL4a+2WzsUKS3McUqODja0bkMD6ZHIrpqcQ4Gn7spas5oc
        NY56xWh2/gz9nj4n/DPxlpXi3XPApnstCZr7yG1WGD51U7GdichATk45NeJmmd4PMMP9XpPfTY9vKsjx
        eX1vbTVyXxv8Jvjv8ePEMHjnV/CggSQRtYWL3yW8UEKsGCxhjkbupbGTnNceExeV5fh5YaL1as7I7MVh
        Mzx1eFWrGyi+p6F+1Zr3iLWPgo8Ou+BbvQBHd2khvJNTguY43GQQAh3HPTNePkFKEMzg4Sv/AJHq55OU
        sBKLWn6nd/sX+JpL/TPh3O7GR3stR0GYlv4YJFliB9wGauniGgo1a1l1TXz0OXIKspQhzdU19x614Ptd
        L0P4qSvc+LbzUNdlu5reLQTOuyCHBw5iAyAAByTXgYis6lHljGysnfzPoacVCtd73sj5c/aC0uJPjdca
        UyhI38RSuSOpEqWrH9S1foGRVGsFKfkvwv8A5H53n9NPG0qfn+bR9J/s96HZ2fwE0VNQMb2F3FPPdeec
        R7XkO7cfSvgc1nOpj5KG6sj9FwFGnSwsVPYi8eeA/DXhH4W+Jr/wrCI5ddjt9O+0JctOhjeQKFQsTheT
        wDSo1q9avCM/s6kVqVGjRlKn1Pi341aXd/Er9qLV/DOlyQxXBuU020887Y0WKIADPbpX6Vl+Kp5flUcR
        VXW/3n5hj8HUzXNHRpv+kcx4V+BHirxd4w1/QdPWzU6BKY9S1W5nEdnbkDPLmuqrn2EpYeniXFv2nQwp
        cOYmtXnRvaMepvap+y14mXwtqPiDw5rnh7xvYacpkvE0G8EssIHJO3vjB/KsKHEdCtVjRqRcVLa5rW4a
        rQoutTlzWKvhz4W/EDwjpvw++IPhe6ia+8R3iW+ix2UhE7SHPyyDpswDnNOvmmCxLrYPELSK3NcLk2Ow
        saeKw71b2PtL4g6ZL8QPBL+FfHOveHdH1GZIX1GwGpqGgkBDcegOOPrX5/hcZTwlf21GLdtj9GxOEeLw
        nsK7V3ufKvww8z4RfFfxXoVrqVlrEE8MUcMulz+dC5Z/3abh1YZ5r7fFV447BRxFVWPi8toPAY+dClK6
        Nb9sDwf4t8P3ng6w1e0W4bUZHW0FoxfdMcARn/a5rPIMXRqQq8rtbUfEWErVHTpRWrOR139lTxJ4Vjto
        vEfijwl4d1CWITDT9Q1NY51U+oro/wBaMLVb5acm1pdHmrhSvG3NNK/c818X6FL4A1m0h/tnTdYlVFuU
        udIuBNGhDcAsO/HSvZwuOWOpSlytep4uLy95dXjaSevQ/R3wBoen/ErUfFmlahLcR2ep22l66/2dwrB3
        gAbBIOASvOK/JsTOWEUJQ3i5L8T9bwkY4pST62f4Hpvgb4c+D/CGnXVn4atrcbEktpJI5BI6hvmMbN9e
        cGvIrYnEV2pVT1aWHo0YJU13PzO+JMUdjqGm28a4aC2khfHql1Og/RVH4V+3Za5Oj739aI/F875frXu9
        v1ZyGc816p4AUAHnY+Q8CgB6vsGOlADs5qWAxhhsjqaVwG5L8rwe9UgELLnggUwFEuOBz+NAATnmgB6v
        hRUsBrHJzSuAmUH3hz9KpAICCxI4ApgSiTzfmPU0ALvI4oAN2eaADnv92gBjgAlhQA3O4ZoAer4AFAEk
        bDOW5B6UAPZ2VjuOVqGzN7iR4ldiBgD1ouSWEuC8QQ9FouAqOZAAaLoBSu3ii4Dx9xaLgWVQRRmZueyi
        s3uBGjC2XkEs3JpAL9pkR0aAEMBzS6gVZt3mNk8nk10RAhkjdhnhQf4s0m9TRbDFG0Y3bj6mlcoSTkHv
        jrVICAkpzimAgYyDd60ASxICDk4JoAQKGGM/doAFbLE0AOY87/7vAoM3uOjGG/Wgke8hVdw52cVLYCIV
        2jcOTz0pXACiscjgelFzRbEbtsYii5QqyHymQn5WOcUXAeZ8/d6dKVwAHdzTuBG5G40XAiZXLEqeKLgC
        ZGQetFwEI3pgnpVIA84pGMdTTAjxt+bPWgBPML8HigAYbQAOaADDmTg8UAS5UcOMt3oAYwZiSmdtADkc
        qoB5P1oAkjO45oAeeTxz9KAIn5Y0APVhtGOGoAehMZBJyTQA9n2HANQ2ZvcPNNK5IinL5p3Alwx6dKV0
        A9ZCgwTz9ad0BAQQeW3CiwD0IzxwKAJqAA8quKAJegFZvcApAI+WC7DgjrQQxxYMcDpQSPUBVxQBIqgj
        OaAHYI4oAaPvmgCQlQw3cigB77Wf5Bx6UAb/AMP/AAZcfEHxlpHh+1lWCbUJxCJnXcIx1ZiO+ACce1cm
        LxMcJQnXkrqKuduCwssdiYYaDs5OxvfGD4Taj8EfFMWlXep2l9JNB58c1m5DBCSuHU8qTg+oI79a48uz
        CnmdF1Yxas7a/p3O3NMsqZTXVGc07q+n69h2kfE7xd4M8L3fgjSNuifarhlvHtoSl7O5O3y3cnIx0wuO
        /qclXAYXE1VjKvvWWl37q80v87k0syxmEoSwNH3LvWy95+Tf+Vj29fgf4F8BeL9N8IDw7q3xG8ZzWQvZ
        rVr5LOzgXnJLDBHIPDE9V9QK+X/tTGYuhLFe0jRpJ2TteT/r5H16yfAYLEQwfspV6zV2rqMV8/8AO/Tu
        elfCTwb8Ovito2rw33wx0/w5qekXz2F3YORJIjAA581QpPUj8O/BrxcwxOPwFSDhiXOMldP/AIGp9Ble
        Ey3M6c41MIqcoPla3f36HxD4sWxm8U6z/Y8As9M+2Si1h3l/Li3nYNzcnjHJr9Rw/P7GHtXeVld+fU/H
        MV7P29T2KtG7svK+hjyRtGu1uSK6DJbEBzQM+o/2CfDzXfjbxFrTDdFY2C2yn0eVwf5RN+dfDcWVuXD0
        6Pd3+5f8E/RODKHNiatf+WNvvf8AwD0nx/8Asr678UviDqut+J/GrQaC0pNrY2ys5ihH3V+YhEwBkkBs
        nJ714mEz6jgcNGjh6N59W+r+Wr/A97G8OV8xxc6+Kr2h0S6LtrovxOs8B/s0fCXTIDLp+l2niSSJvLku
        b25F58wHRlB8sHnONo61wYrO8zm7Tk4X6JW/4P4np4PIMppq9OCnbq3zf8D8D5V+JVte/H7xHYw/D34W
        SaHY2Akh32lmsPnZYczMqrGmCDgEnq3J7fe4JwymlJ47FczlZ6tu3pu39x+dY+M86rRWX4TkjG60SV/X
        ZL7/AJniWr6TeaDql3puoW72l9aytDPBKMMjqcEH8a+npzhVgqlN3T1TPlKtKdGbp1FaS0aKDcsa0sZF
        jS9VuNB1ay1K1ZVu7OdLiFnUOodGDLkHgjIHBrOpTjVhKnLZqz+Z0UqkqM41Ibppr5H0jrPjr4u/tWw6
        ZHo2jXGm+HreZIbmTTZTFA84xvkd2YE7QwIQE49zzXxlLC5XkLk6s1KbWl9Xbtb9ep93VxebcQqKowca
        adnZ2V+rb8u3Q1P2tvF914g/aH8H+G5IJoNO0m4ttjSIVE0k0iM7rkYIACLn1Vq58gw8aOWVq6d5ST+S
        Sdl+b+46OIsTKtmlHDtWjBr5ttXf5L7z0zQbs6t+3X4mB4j0rw+qFu2CsDc/jMfyrxasfZ8P0/70/wD5
        L/I9yjL2nEdX+5D/AOR/zOO/YuvjqHhH4tTbtyyyCUMe+6OY5r0OJI8lbCr+t0edwxLnoYt99fwZ8VN0
        r9MPy+wxelAWN7wD4SuPHvjfRPD1o/kzaldx2xl27hGGYBnI7hRk/hXJi8RHCUJ15bRTZ14TDSxeIhh4
        7yaX/B+R3P7Rfwl0P4N+NY9C0bX21uTyBLcwyxBZLRj91WYHBLD5sYBAIz1BrzcnzCtmVB1qtPl108z1
        M6y6jlmIVClU5tNe6PbNePk/skfCDRIeuq63CjKP4lM07kf99MtfM0dc6xdZ/Zi/yS/I+praZJg6K+1N
        fm3+Z6/4Amhm/a++Jgt0VRHpVkkzL0aTZEcn3wcfhXz2LTWSYbm/mlb0uz6LBtPPcVy9Ixv62R4j4Aa0
        T9lb4w3t3aw3FwdWdRLNGGwzeSqEZ6MC5II6E19Ni1L+2MJCLaXL/n/kfK4PkWS4yckm+Z7+dkvzOo8R
        sLn/AIJ9WDnBKRwAEHoRfBa4aK5eJJL1/wDSTvr+9wvF+n/pZ8XfP2PFfpNj8vE4/i5NFgPvP9mi+0Hw
        /wDsl3154myvh6Wa7S+wGJMTsImGF574+Xn8a/Ks6hWq5zGGH+NJW9VqfruRSoUcklPE/A3K/o9De+An
        7O+mfDHx7qPjHQdfi1jwtqWmGKwLNukRXkRyS4G1lAjGG4PJBHGTy5tnFTHYeOFrU+WpGWvyTXqt9jry
        fJaWAxMsXQqc1OUdPm099ntuYOvfCvwV+0n4y0jx14H8Q2sVxpd9DHqlmsIQSpHNuLkABg5XOGOQwCjI
        wa6qWOxeTUJ4PGU3aSfK77XW3a3ddDlrZfg88xEMbgqivFrmVt7Pfvfs9noZ37Rfji3j/af+FOkwRxLN
        p17bSXNwFG/9/Oq7CeuAi7sf7db5PhZPKcVVltJOy/wq9/v/ACOfO8XFZxhKUVrFq7/xNK33fmcz/wAF
        EpCur+CFzx5F2cf8Cirs4QXuVvWP6nHxn/Eoekv0Pj9CWA461+hH5tYMigLH6L/sq/B3wz8L/DFrr8Ot
        2us6t4jgQx3oAjUR43eTECdx5+93JUZAxivx/PcxxGOrOi4OMab28+7/AE/M/aeH8sw2AoqvGalKot9t
        Oy/X8jN+OHjnw3+z62qLpd4Y/HPjK533Gq3WZ5LG3LbfNIUZEca5EaAZJX+LBztlmFxGbcvtF+6pLRLR
        N729X1f5GOa4rD5Pz+yl++rPWT1cVtfToui/MyPhN+0rod94q0f4aeC/Bl3qnhoD7KNQlmCyOn/LW4ki
        K4KnLMdzAnPQE7a6cfktaFGeYYusoz3tbTySd9+i0/zOXLs8oSrwy7B0XKnte+vnJq23V3ev4HpPxH8I
        S+GfhB4j8J/Cm1sLHWWjMradbzBZljlb94y5OQxXcFJIAxhegFeLgsQq2Np4nMm3Hu1pdbfLv+J7mNwz
        oYCphcrSU+yetnv8+34dD807+yudJvZ7K8tpbS6gcxywToUeNh1DA8gj0r9og41IqUHdM/DJwlTk4TVm
        ujGKcqDVkD1VnAVQWYnAAGSTStYjfRHonw+/Z+8efEmeKPS9Aube0YgPqF+hgt0HruYfNj0UE+1ePi82
        wWCTdSom+y1f9etj2sFkuOx8kqVNpd3ov+D8rkXxi+DGsfBzxfBoGoTQX7XUKT21zbZCyqzFcYPKkMCM
        H2Peqy7MaWZUHWgmrOzT6E5plVbK8QqFRp3V011Pom/8e+CfgL+zpceAG1G28Q+KdSsp0urXTpRMkc86
        kMXkX5VCAqMZ3HaOOcj4+GExea5osaouFOLVm9NF2Xn92p9vPGYLJ8peAclOpJO6Wusu720+/Qwf2PfG
        1p8ObHXNM8YafdaVoOtqksOp3trItmzAMrI7ldoDAjk8fKQeorq4iwrxkoVMJJSnDdJq/qlvocfDGLjg
        Y1KWMi4057SafL2ab21OI/aV8IfCnwzdaf8A8IBq6313M7vdW1rdC6toUwNu1+cHJIxuPA5x39TJMRmN
        dS+vQsls2rNv0/4CPHz7DZXh5R/s+d273Sd0l6/8Fnh4jE/I4Ar6jQ+SCjQDR8OeIJvC2v6dq1tFBPcW
        NwlzHHcpvjZlYMNy5GRkVlWoqvTlSk2lJW031N6FaWHqxrRSbi09dtD6A+C/xB+Mvxi+KDy6V4nvLe3a
        RZr+SRfMsbSHPQQtlQSMgKMMTyTwWHyOZ4PKctwlqtJN7L+Zv139ei/A+0yrG5zmmNvSqtLd/wAqXpt6
        dX36n0n44/aM+GUXiHUvAWu6pJsnge0vLqNW+zIXBVomkQ7lbB5IGF7kEED4vC5LmLpRxtGOzul1062f
        T8+x93i89yxVZYCvPdWb6a6NXWt/wXc+WPi5+ylqnhi1bxD4KuB4v8IyjzY5rNhLPCn+0E4dR/eX3yBX
        3eX59Try9hjF7Oqu+if37ejPzzM+HKuHj9YwT9pSfbVr7t15r7keBdK+s0PjCRPuCjQBjfeNGgHovgT9
        nrx/8RoILnSPD1wNPmG5L67IghZf7ys5G4f7oNeNis3wODbjVqLmXRav8Nvme5g8kx+OSlRpvlfV6L8d
        /lc998I/sIQWVs2o+O/E4EEEZkmt9LGFVVGSWmkHQAc4T6Gvk8RxU5v2eCpavq/8l/mfZ4Xg+MF7THVd
        Fuo/5v8AyKL+DP2ffifq+n+C/Cl7eaJqxlzDqqxyMl2QPmiJlPJIBI4AyOM5wdfrOd4GEsXiYqUesdNP
        PT8f6Zj9V4fzCpHBYSTjK+ktdfLX8NvLsei/Cr4J/BPw549hsdI1QeJfF2m/6YonvPN8hkYfNiMLHlWI
        4OSD7jNeNj8zzeth3OrHkpy00Vr39bvU93LspyWhilToz56sddXe1vSy0Og8a/E34aeK/i3B8OPEmgQa
        zqIAghvri1jmjhmcBjEHPzISAuSvfg4xXJhsDmGHwTx+HqOMd7JtNpdbbP5nZi8wy3E49ZdiaalLZNpN
        JvpfddNj53/a9+B3g/4Trot94caeyn1OWRW0x5DLGqIAS6FvmGCyjBJ68Yxz9hw7mmKzDnhiLNRtrs9e
        j6HxHE2UYPLfZzw905N+7utOq6nzaMfxDI7V9pofCEkRCA4JaQ9u1Q9wPZPhP8cfiXp2k6V8O/Bbww3E
        145t5Ft1lmG8glcuGVUB3MTtyMk54r5rH5ZgJVJ47FrRLXWy09Nb9Nz6vLc3zKFOGX4J6t6aXevrdW3e
        x9Z+Kf2oPDHwt1nS/DOuXF9rV9DGlvqOsWluvkpOqgOWAIy2TuZUHy7gMZ4r4PD5FiMfTliKKUU9Yxb1
        t0+XZvc/R8TxDhcuqQw1duTWkpJaX6/Pq0tvwPAvjh+zppmuabceO/hbeQ69okhM15p1nJ5r25PLNGBz
        jnlD8y/ThfrcrzmpSksFmS5Z7JvS/r/ns/z+MzbIqVaDx+Vy54PVpa29P1W6/L5qXOBX2jPgBjfepATR
        4KAAfNQA1o5JJEQAuzHAVRkk+gpN21Y0m3ZHceCvh9put3d+viTxVZeC4bGUQzxX8Mr3ZbnIWFRk4wQc
        kYNeZisZUpKP1ek6nNqrNW+89bCYGnWlL61WVJRdndPm+SPb/hnr3wV+E2u22r6Be+J/G3iWISRwJbWj
        KCWUqSsZCcEE/eLY64yBXzGOpZvmFN0q6hTpu17v576/ofX5fWyTLKqrYeU6tRXtZfLbT8bkvxM+OPjZ
        5Ztctfg1BodsRuk1bW9FeeYjG0M0hRQvGOueg5IpYHK8HZUZ4xyf8sZJL7rsvMM3xrbrwwKgv5pQbf32
        Vjivh58RtT+M3jzS/DWveDtC1/TtQlWC4NppSQXFpCSA0yTRgMmzluTjqO4r08bgqWW4aWIoVpRlHVXk
        2m+zT0d9jysDjqua4qGGr0IzjJ2dopNLumtVbc4T48fB66+C/jqbSHka502dftFhdMOZIicYbtuUjB/A
        8ZFeplWYwzLDqra0lo15/wCTPIzjK5ZViXRbvF6xfdf5rqeav9817Oh4Re0Hw/rPiTURa6Fpt7ql8q+Y
        IdPgeaQAEDdhASACRz7isa1WlQjzVpKK82kvxOuhRrV5ctGLk/JNv8D9Ff2X9O+IEXw41JPHs+opqk92
        5tH1KXzLiOIxIATkkj5gxAPPX1r8ezyeCeKi8Elypa22vd/oftmQQx6wkljm+ZvS+rtZfqfNHhHwx/wz
        H+1H4X0u41231iK4CQ3U8SeWIxcb4wrruO0g7H5PQg19rXrf23lFWpGDjbbr8Nnp+KPhcNQ/sHOaVKVR
        ST0b2+K6138mfRXw1l8UeGv2hfHegyeGj/wi+oztqia59mZMSPHGdnm4w4J3Db1BB7ZFfH41YatltCsq
        n7yK5eW/ZvW3T1PtcC8TQzTEUHS/dyfNzW6tLS/X06Mq+F/hn8QdT/abvvGviloh4c05LmDR1W4VsRNl
        IwEHKkoSzE4Of0uvjcFDKo4TDfHKzlp13evrsZ4fAY+ecSxmJ+CN1HXo9Fp6as+K/wBoXxQPGvxp8Xao
        snmQfbnghcHho4sRKR7EID+NfpOUUPq2BpU3va/zev6n5hnNf61mFaqtr2XotF+R5yzbiTXrnlLYQFM5
        YZQfeHrQM/RX4Cax468Mfs1S67rCXuvailpnQtIS2DSiFVCW6/Iu9gxIJLZwmD65/Ic1p4Ovmio0rRjf
        3pX0vu99NPzP2TKKmMoZU61W85W9yNtbbR21d/yPC/jB+x/8S7vxDa6gusHxgl1F519qmoXMdstlIT84
        IeUkoOuUHTjHAz9Rl/EOXxpuHJ7O2iSTd+2y39fvPlsx4dzCVVT5/aX1bbSs+u729PuPQdF+Iui/B/w3
        p3wk+Fun2vxG8X3qSPeSiRDZPMYyZS7Fgr/KmNgYAKoBbOQfIq4OrmFWWZ5jJ0qStb+a19LdtXvbfZWP
        XpYyjl1KOV5bFVqrvf8AlvbW/fRbX23dzF+Ftx+0Rrnxe0qDVo9Q0XR7OdGvoZrRINOS2BG6NAoCuSo2
        rtJOTnI5NdWOWR0sFJ07Sk1preV+76rzucuAee1cdGNW8Yp66Wjbsuj8rEn7blh8NdQtf7QsNXsIPHcE
        gSW1sB5jXSZwwm2cI69QzYJAxzkYXDMswg+ScG6L6vS3pfdPy9Q4ohl817SE0qy6LW/rbZrz9D406Otf
        oh+bnQ+APAWsfEvxXY+H9DtjcX102Mn7kSD70jnsqjkn8BkkCuTF4qlgqMq9Z2S/HyXmdmEwlXHVo0KK
        u3+Hm/I/SO7+El/4J/Z8vvBHgSdItXFi0MV3K3lNNK5zK5YfdZgX2n+H5RkAZr8bjmEMTmUcXjF7t9t7
        JbL0XXvqftMsunhcslg8E/eta+12936vW3bQ+UP2TtY8G/CPU/FnirxpqMNjrWlg2FppYG+43HPmlFHU
        kgICDgfNkgHNfeZ9TxWYRpYbCRvGWrfTyv8An9x8Bw/UwmXTq4nFytOOiXXzt+X3nceBf2y/H3j3x+2l
        6L4Ut9RsL3UIlijSGSSSytiwVi7IQD8uWLNgA57cDzMVw5gsLhvaVarTSfVavyv+X6nqYTiXHYvE+zpU
        k4tq2j0Xnb77/oeu/tRfDr4h/EWx8PWvgPVn0tIZJjfhNQe1EgYJ5e7bywGH49+lfP5JjMDg5VJYyHNe
        1tL977/I+iz3B47GRpxwU+W176tdrbb9T5L+IP7HnxH8IeFtV8VatcadqUdmvnXKW91JNclON0nzIAQo
        5PzZwCccV97hOIcDiK0cPTTV9FdJL03/AEPz/GcOY/D0Z4mq1K2rs2367fqeDp9wV9SfJjWRWJxw1AH0
        F+yNqAX4keErIqAUvrxvM7kvbAAf+OGvjOJIfuJS8l+Z99wrUXtuTzf5H0Ra6HbQ/tF+ebKJNSacyrbJ
        pzqTHt5uTc7sMf8AZAx2r4eVWX1FRu7ev4WPt1H/AGtHhv7bFvJH4Z8aqR08XWcrf7jWYCn8wa+o4bmo
        1qb/ALr/ADPnM+i/ZVV5o830X9oXwf4s+CHh/wCHXxA8K+KmtdDcNa6l4VkaMTAE7S2B7nI5BrDFZVWp
        Y14inUjd9GdODzCnVwMKNSm0l1RteEP2ffht8evAfi+98CXvjvw7qmg25maLxMzNbz/KWA54P3e3Tiue
        pmeIwNZU6nJJPsjrjl1DE026cpI9L8Hftla98LfBnhSx8eeEZ/F+janZW50/xdoke6C6gOFYTKQdskeC
        GHfbnvXlTy+OKlKrRnZ/yvQ9CGJlQjGFWN13PSPF/wC0HffDjwzcv8NfgjrGv6AButb6zt1traaVz1EW
        PMK5P3sVwUcOsTN/WK1nE7ak1RivY07pnw74v1bW9Q/aat7nV9YOoazNrli2oy2TNDBHMWTdbqoOCI87
        Mnrg1+iUMNRWUSqKnst31PgauIqyzWMHN2b27Hdft96lcad+1LcyQzSHyNPsZ1gaRjEzKdwDIDggkc8c
        1x8PYajiMvmqiW/zOviDE1qGKp+zbNH4l/H34YfHm40jV/HHg/4haXrtjZi0aPw/O6WrDOSQMY69D1xX
        m0cBicvqy9hODT7nqyx9HG0o+2jJW7GP8S/gN4TPwBi+LHgXVfEtvpkdwsNxo3irO9gX2ZXPcHp2Ir0M
        tzWtHG/VakY3fVHm5tldKWC9tTcl6nrn7DcLjQPAu4bDLrmqTIPVFgVSfzNYcR8vPUS7R/NmuQaQpK99
        X+R9BaRp2py/Ge51u7uLe2sBO1laWlmVMtxxkyXDld2ODtQHHFfKzmnhPZ9dz6OMbYnmPmD9oiZbn9o8
        uDiP+3UhLe6xWmf5193kUX/Z8l/d/wDkj4HPpJ5jTf8Ae/8AkT6P+GVo2tfss2Ftb7S8mmTQ9eDhyD9O
        K+GxbUc1lJ9z9AgnPBWj2M6/UW37LmmOYlii065tmdEGMJHcLk/lW0eVZhKPSzt9xl731OL81f7z5ONq
        9n+35NbYLNJrkso2jOQ0e4foa+txUnLh2NtdNfvPksFStnsmtNXY6ldLvfiH8P8A4++BvDn77xcviRrt
        9NRwk11b8HCj+IYBFfO0KtPDYnCYivd04p+iPp6qqVKNfD0V776lb9jr4c+Jfg/r/jTxp4v0e58HeE7b
        RJoLltTUQLcydVUKTyRz+eK9bPMVg8d7CGGd5J30PGyLC4vAwqSxPwtdS34i8T694Y/ZX/Z48Q+Fod+u
        x62ZdPtnj3CYuZNsRH+0DiuDCYelVxlejiZ2TW562KrzpYenVoxvrsdFb6l4p8c+ORqXir9le4N/q1xD
        FqOoxXjJkDC+ZgnHyjn6CsqlOjhIfusSnbZWRUKlWtK06LV99zU8I/s8+HvBf7WWq/8ACJ28154a8OaY
        NZu9OiPmmK+OfKtge5ON208jNOrnEq2Wexqv3m7fI56WUKjmPt6a923fqct4SHj34seF/iB4P8Tafe6N
        8TdM1P8A4TjwtBqKfvQvmcRKCeV+ULgf3qU44fBTp1aLvTkrSsap18WpRqRtODvEx/H2p+NPirqNnrPj
        v9lmbWdeSFLaXUIriSJnUH0zgY5PNaUoUcDB/VsVpvayMpyqY6SVSg9NN2jyj9qL4ceG/hh4h0S18O2x
        019SsvPu9I8zebR8jHuOuMH0r6nhzH18ZGp7bZbO1j5biDLqOHnTlTVpPpe599fAjT3s/EetKww1t4Z0
        i0k3HGHEBYg/mK+EzGSmoy7yk/xPs8BD2cpW2UY/kaX7Nt0svh7xBeJgwNqUqB/LCFigO48dR6N3rDNY
        pVYQWyidmBcnCbfc/P8A+J6CbXobnPFwLiYfQ3lxiv13K3eh935I/H88jy4u3l+rOPYAHGa9c8ATj1oA
        Y2cnA3/XtQAsY3nrkDuaAHk7jmpYCEHoOJD90+lIBWI2cGqQEDFMnIyfWmAkRBkOOlAE0pBoASN8IBUs
        CeJBMDkgY9aQDHOF5qkBEc5pgIXxwAd3rQA5JWztagB7YBoATfjigBr5YZxQAkTlOv3aAJGYMS6j7vAF
        ADQ+x8UATA7hmpZmyRZVQYIOaQrC+bn7ucfSgQ9XLjB7UACykvnkn+6RRYdiRZTu5G32FFgsTPPJIgQd
        FrN7iEaV2C7fvD71IC1BeJAGDD53HyH0pdQKVwwZyR3reIFeT7i0Pc0WxE2M8dfWkUCOYCXOSp+9jvVI
        CNiSuT1NMCEtIOnSgB6sdu8/eXigBcY/nQAUASJ9wUGb3FoJHrMirg9aljsAmBfjgUgsx5bcc0Gi2InI
        DHmgZExG7rQA5CNo5oAcspjJxzn0oABtA+Yc/SgBkgJ+6cL6UANCkICTlqAI9xbnNUgFXqaYDMHI+tAD
        5FBbNADRw1ACsACWzQABiwzQBKjeWhP96gBiAKuKAHdfunB70ASRnIPl8evvQBGxGTjgUAFAEifcFAAQ
        dwqWZslzh6QrDiRmgLDlPy9RRYLDXkVWwVyfXFFhDVJZskUXAlC4G6i4Di25QaLgCPthYUrgTFtyqfao
        YD3Py0gIcE844oAkQ8p+NAAOlAEi4KgD73rQBKuQvJ5oIe4vOM5oJFw1Both6527lOCvWgZ6x+zXrFt4
        X8c6l4knjEo0HRrzUooz/HII9ir+Jkx+NeBndOVfDRw8ftyivle/6H0WQ1I4fFyxMv8Al3CUvna36lb4
        V6be/Gj446Y+uzNfNeXZvtQmm+6Yo/3jg9gpC7R2GQBV4+cMsy+Soq1laPq9F/mY5bTnm2Zwdd3u7yfk
        tX8uh9G+Avhh8IvEXjfxD4zh8S33iW50u8fV7yaZWjs7di7SglvLG/BUnhiDt5FfG4vHZpRw9PCOmoKS
        5V1k9Eu+n3H3eCy/J6+Jq42NV1HB8z6RWrfbX7zsPDPxd+H+qWniz4naN4e1a4uLQR2uo30drmeSPC/d
        BkxsVVRmxjAAJzXm18ux0JUsuq1IpO7Svpf7t3sj1cPmeX1I1s0o0pNqyk7ataba7LRvbudR8O/iD4G1
        LwNrfjfRbUaNpDTz3WpXEtr5UjyIN0kjhclzg9sk5x14rhxmDxkMRDB1nzSslFXurPZLsehgcdgamFqY
        6guWF25O1ndbt23PNbGP9mrx7eL5S6JBcSMCEczacC2RwAfLB57Dr+Ne3J8QYSOvNb5S/wAzwILhnGy0
        5U36x/yPm79pv4d2Hwy+Js1jo6rHo17axX1lEshk2I2VI3Ekkb0cjnoRX2mSY2pjsIp1fiTaf9ejPguI
        MBTy/GuFH4JJSXXR6fmmeRk5XNe+fNH154Y1dv2af2XTdzH7P4t8Vu81nFjEkYZAquf9xMP7NIAetfnl
        en/bWb8q1p0t/wCvN6eiP0/D1f7AyTnelWrqu6utH8lr6ux6x4S8NaZrX7K2i6Z4v1Waw0m40qGe7vTc
        CJ0iLiVRvYEAEbV6cg4FeBiK9SnnE6mFjeSk0la+u2y+8+kw2HpVcjp0sZO0HFNu9tL33f3HLfBr4nfB
        T4feIV8LeDry+M+sTpE99cCUwySjIQEuRtJLEAqoBJGT0rvzLA5vi6X1nFJWgtla9uu36s8/KswyXBVf
        quDk7za1d7N9N/0Rk/tBftW+MvhN4/vPDtjoGlpbpHHNb3d6JJTPGy/fAVlAwwZe/KmtspyHC4/DKvOo
        79UrKz+5mOc8RYzLsVLDwpxto03d3T66NddD5D+JXxE1L4m+KbnxBq0NpDqFwqLL9jiMaNtUKCQSecAD
        Oe1foeCwtPA0FQpN2XfU/NsdjamPrvEVUlJ9lbYxtY0PUPDk9vFqNs1rLPbQ3catg7opUDxtx6qwPqOh
        5rppVoVk3Td7Nr5p2ZzVaNSg1GorNpP5NXX4GXiS4mAVS5c4VVGST6CtG7asySvoj7B/Z+8E+IvgF8M/
        FvxJ155tMP8AZ7jT9Cu3ZElkOPLkmjyMEttVRw2C3TIr89zbFUM2xVLAUdddZLouqT9NX02P0nJsLiMn
        wdbMa/u+7pF9X0bXrouu5xvxq/al074ufDjw4jaS+m+MtL1aO8LoA9uEVGyyMTuAZih2H+71OBn0ctyO
        eX4qo+e9KUWvPdb+ivqefmef08ywlP3OWrGSflont6u2n4nQeFvEeuaL4H8T/EPWmQ+O/iVImi6Daqoj
        JQ4jMwXsoyuCf7idd4NclelRqYilgaX8HD+9N/jb1/zfY7cPWrUsPVx9b+NiPdgvwv6dvRdyr8I/ilon
        7Lg8b/D/AMX6dJNrDTEvqWlMJ4pswjZGQ20gDcSDjq5BAxVZhgqueexxuFl7vZ6Na6vr/SIy/H0ci9vg
        cVG8u8dU9NF0/pnyiOlfeXPgS/rOi3nh26hgvYTDNcW0F2gP8UU0SyxsPqrr/KsqdaFVOUHs2vmnZ/ij
        WrSnRajNWuk/k1dfgzv/ANnDUF8P/Fez1lgHGkWGo6lsJ+8YrKZwPzAryc4j7XBul/M4r75JHr5LP2WN
        Vb+RSl90Wy74C0O68XaR8QviL4ika8h06ymzPcc/aL+6zFH9SpkL8dCE7GoxVaOHnh8DQ05mtF0jHV/f
        a33l4SlLEQxGPru6inq+spaL7r3+49O+B/iaX4y3Hwl8Dw6ZMv8Awh19Lqt/fkgxGJH3xDA6ZJVDnuR6
        nHiZnRWXLFYxy/ipRS63as/8z3cqrvMnhMGo/wAFuTfSyd1/kb3gD4s3Hw6+JfxE+IWt+FNd1Lw/r1zJ
        HZ6lpdus0caRSuoWRiwC8Ko5Ofl6VyYvARxmFw+Bo1YqcErpu26Wx04PMZYLF4jH1qUpQm3ZxV0rN766
        Hz4vxa1SD4Z6z4Kt4IY9J1XVf7UnlwfNJwuI89NuURvqK+v+oU3ioYuT96MeVdvX8WfF/wBpVVhJ4OK9
        2UuZ9+mnpoj6Pnb7T/wTrjkbjZggD21XbXxyduJn/X/Ls+2evCqf9fxD40Y7sN/D6V+jXPzIeeT8vAou
        B9l+F9D1jX/2EINJ0KwuNT1PU7wxRwWyFmx9vySfQYTknAA61+cV61KjxC6taVoxW7/wf8E/T8PRq1uG
        lSoxcpSdrL/H/wAA9O8E+MPCn7O1n4G+Feragr6xeQs1zPvBhgmclvnJPyq7llXjoATjOa8PFYfE5xKv
        mNOPup6d2l29Fqz3sLicLksaGWVZe81q+ib119XovxPPPhX4U8OfDT4w/FT4iW96tt4E0MNbW72rfupZ
        pFR5Yk5w2xvkC/3mXHSvXx2Ir43BYbAyV6s9Xfeyuk32utfS542X4fD4HHYvHxlajDRW2bdm0u9npbu0
        dP8AGTwz4X+LHhPwp8XtFu0srrT57W4WacBPtEQnUGBxz+8V8gYzzleQQRxZbXxGX1quV1ldSTXo7bry
        a3+878yoYbMaFLNaLs4uL16q+z809vuOB/4KJWzLfeBZ/wCBo71PxBhP/s1erwhL3a8f8P6nlcZR96hL
        /F+h8dfPy4P3elfolz83EdSoXPXrRcD7l/Zm8J/C34a+BNJ8f6t4msLjWbmFts+oTrGLF/8AlpDDETne
        MkEgEnORgNz+YZ1iMxxuIngqVNqKeyW/Zt9v6eqP1PI8PluBw0MdVqpya3b27pLv/S0ZY8X6xo/7RL+I
        NM+HHgpNXn1YR22oeNdUjMFvbqhXb5ZYF2ICr8qhexINThqdTKFTqY+tyqN2qa1bv3tp83f1KxNSlnLq
        U8BQ5nKylUeiVrbX1+St6HQ2XgSb9mjwaNK+H3hW+8X+NtTjxNqr2+2BSP4pHJCqoP3Yg2T1J7nkli1n
        Vf2mOqqnSjtG+vyW7fd29DrjhHkWH9lgKTqVpbytp83sl2V/U8X079mL463PiWTxg+owab4lkkM7XEmp
        jzyx6jMYZcY4252446V9LPPMmjSWFUW6e1uXT8bP57ny8MhzuVZ4tyUam9+bX8Lr5bH03ffCTRfiT4N0
        eL4o6PpUniyWEQz3do4ilaUZx5ci4J4AO3lc54xXxEcwq4KvN5dN+zT0T1VvNfrufdzy2jjsPBZlCPtW
        rNrR38n+mx84/F/9hfUPDlhdav4L1RtWtIEaWTTr/alwqDk7HGFfjsQp44yeK+yy7imnWkqWLjyt9Vt8
        1uvxPicy4TnQi6uDlzJdHv8AJ7P8Dz79mr4+6d8DX8RTajop1aW8gjNo0IRZFlQkbDIeVRgxyQDyo4Oa
        9bOsqnmipqnPls3f0fl3X9M8bI84p5S6jqQ5m0rbXuul+id/+AfVv7NX7SV/8dNW8QWd/o1vpf2COOaF
        raRnyrEgqxPfIGCMd+OK+CzrJoZXCnKE3Lmunc/QsizyebTqQnBR5bNWPin46+O7r4h/E/xBrsssk9p9
        qe1syfux26MwiUdhkAtj1LGv0zKsNHBYSnRSs7Xfq9z8szfFyx2MqVm7q9l6Lb/M+w9K8FeH7b4XS6z8
        CbLw7qHiBUjD3V2vn3B2pyo3k+VKeDtbCnnI5Br87qYqvLFqlnMpKGui0W/luvTU/S6eFoRwTrZJGDnp
        q9Xt57PyehofAHx/4uPwj8U+I/idLKwsLi4wt7arBJ5UcY8xSoVQRv3KARnII9BWGbYTC/XaVDL18SWz
        urt6dX01NsnxmL+o1cRmT+FvdWdktei66HwB4h1d/EOv3+pvb21obyd5/s1nGI4YtxJ2oo6KOgr9Xo0/
        Y0407t2Vrvd+p+OV6vtqsqlkru9lol6FOUMnzqfvVsYEYdlGCeaAPSvg/wDADxT8ZtUj/s60ez0UPifV
        7hCIYwOoX/no3+yvtkgc15GYZvh8ug+d3l0it/8AgLzPeyzJsVmc17NWh1k9v+C/JfOx9Yar4J8X+FPC
        jfDz4ReHn0mzGU1HxXqki27TSEYZox99icY8wLgDhexr4KnisLiK317NKnM/swWtl59Plf1P0SphcXh6
        H9n5TT5V9qctLvrbq/W2nTozzQ/sMHQNEuNW8W+P7LSbW3TzLmSGzaSNB3/eO6dyP4ec9K9z/Wr2tRUs
        NQcm9tbfgk/zPBfCPsabq4rEKKW+l/xbX5HW/Bn4LXuhRHxB8Kvivb6zaJLsuNOu7RltJ24JWUByUOCM
        HZu54NedmWZwrP2GZYVxfRp6r001++x6WV5VOivb5Xi1JX1TWj9ddPuuel/FH9lfwb8VA1/cWp0DX5Bu
        kvdLI2u/fehAD8/xYVj614eBz3FYH3Ivmh2f6dvxR7uYcPYPMP3klyTfWP6rr66M+XPiD+xJ468JxyXG
        jPB4psU5xZ/urjHqYmPP0VmNfcYTiXB4i0at4Pz1X3/5pHwGN4Vx2GvKjaovLR/c/wBGzwO8tJrG6mtZ
        4ZYLqFzHJFKpV0YHBVgeQQeMGvq4yU0pRd0z42UZQk4yVmj0zwf8UviZr+hab8OvD+q6hLFJLsggsyVm
        CnjYZR8yxDk4yAATngceLiMDl9GpLHV4q/W+3rbv/W572GzDMq1KOX4ebtfRLf0vvb8PkfYt58OPH/gf
        4WeE/CvgnVbSO/tp/tOrazqU52DDeY64IYlGZiOB91MH7xr87jjMFisZVxOLi7NWjFL5L5pfi/I/TpYH
        H4TBUcLgprmTvKTfzffRv8F5nnv7Unwp+HWqfDHVPHegNp1tqlpNHE02jzI1vcyGVUeNlU7d43FsjDcc
        5r1sjx+Ohi44OvdxafxLVK109en4djxeIMuy+pg547D2Uk18LVm7pNaaX/Hucv8As72qfA34MeJ/irqs
        C/br6P7Fo0EvBlG7A99rSAE/7MRNd2byeaY6nltN6R1l/XkvxZ5+SRWU5fVzSqtZaRXf/h3+Cuch+yPo
        N/8AEH4+Ra7fNJdCxE2qXlxJ1eVsquT6l33f8BNejxBWhhMudGGnNaKXl/wyPM4bozxuZqvPXlvJvz6f
        i7/IpftiePh41+Ml7a28m+x0SMadHg8GRSTKfrvJX/gArTh3CfVsDGUlrPX5dPw1+ZnxNjPrWYSjF+7D
        3fn1/HT5HhytsJI/ir6c+SOy+GWkeDNW1N7fxj4hvvD0Bx5Vza2X2iM9chyDuXtjCkdc4rzsbUxdKHNh
        aam+zdvu6fij1MDSwdWfLjKjgu6V/v6/gz3u/wDiF8LPgl4I1OD4X3lzrnjbUYfIXWZIXLwqSNx3Mqqu
        ACQEHUKWzivlY4TMczxEZZjFRpRd+W+/4v8AH5H188bleU4aUcsk5VpK3NbVfekl8lva5yvws/aK8KeH
        /hdJ4S8b+EpPFRju5bm3ZxG4/eckln+ZW3FvmGTg1247J8TVxaxOEq8miT36enTyODL87wtHBPCY2j7T
        VtbdfXVO/U5z4eeOpvhd8X9M8UW+m3/hTwrf3g3WknmyRmyc/Mu4gGUKp3DgnIGOa7sZhVjsFLDSkp1I
        rfRe8vyvscGCxksvx8cVGDp0pPbVrlf523PpXxof2c/ieZLi91bSLK+lBY3tnI1nMT3LDADN/vKTXxeG
        /t3A2jCEmuz1X/A+TPusV/q7mF5TnFSfVe6/8n80z5J+LfhLwl4S1yKHwj4tTxVYyqzMfIZHt8EYVmwF
        fPqvocgcZ/QMvxGJxFNvFUuRrz3/AFXzPzfMsNhMNUSwlb2kX5bfo/kcTGrAFlPFeoeQekfs+ePfDHw3
        +IcOv+KtNutRht4W+y/ZURzDOSMSFWZQcDdjngkEDIFeLm+FxGNwzo4eSTe9+q7HvZLjMNgcWq+Ki5JL
        S1tH31sc98QtdtPFnxD1/VNJSZbPVdSmuYFmUBwJJC3IBOOW6V2YSnPD4WnTqbxik/kjhxtWGKxdSrS2
        lJtX82fcfxl0rxj4G8PaH4f+EHhqC1lvQ8V3f2NtEjQKgQLljhQW3MSzc/Kcc81+X5bUwuKqzr5pUuls
        m3re/wCXZH63mlPGYSlTw+UUknLdpLS1vlr3Z0elapqPwO+Bsmo+OdYk1/U7CB5riWSQs0sjsdkCs3Lc
        sqAn68DgcVSEM0zD2eDhyxk7LyS3f6ndTqVMoy32mOnzyirvzb2V/wAD4kh/ai+ImnaleXWlaraaJDdS
        FzaWWmWyxIM5AAMZPGepJJ7k5r9MeR4GcYxqxcrdXKV/zPylcQZhCcpUpqKfRRjb8ji/iH8UfFHxO1G3
        vPEurSapLAhjh3RpGsak5OFRVAzgZOMnAr0cJgcPgYuOHhyp+r/M8zGZhicwkp4mfM1tsvyscmRt4ruP
        PO2+DPxSuvg94+tPEltai/WKOSGa0MvliZHUjBbBxhtrdOqivOzHBRzHDPDydtnfe1v6setleYSyzErE
        RV7XTW17/wBXPtr4Z/GvxT8XvgX458QQ6bFb69Z/a7bToNLRyxcW6vHgEsWcM/brxgV+a47LMNl2YUKD
        leD5XK9u9n8rI/VMBmuJzLLa+IUbTXMoqN/5U13u7s+Hte+F/jXSvEunadqmmXX/AAkWrN5sFmZllvJC
        T950DF1JOTlwCcE9jX6dSx+EqUpTpyXJHd7L5PZ/I/Ka2AxlOtGnVi/aT2V7y+a3XzPuL4DaV8bbnxOm
        q/ETUYrfREsTBHpeYjK8ny7ZGEYODgMSS2cnGB2/MM1qZQqXs8DG873vra3bX/I/V8op5zKt7XMJWha1
        tL376f5nEfEvwP4j+HOseKfE6/HpdHupmuLm30e8bO5W3MsKxtKeQCFXbGcdQBivTwWKoYyFLDvA8yVk
        5Ly63t992eZjsLiMFOrifr/K3dqL89bWbforI+HWYsxJJJPJJ71+m3Py0jYfMadwO6+CHiDwx4a+JWk3
        njDS4dV8P7jHcRzIZFiyMLLsH3tpwSpByM8E4ry8zp4ithZwwsuWfTz8r9Lnq5XWw9DFwni480Ovl526
        2PtW2/bJ0fxH430zwx4I8L6l4jjmuobaS+CmCKGNnCtIECs21VOfmCYx6CvzaXDtWjQliMXVULJu27b7
        Xuld+Vz9NjxJSrYiOHwdJzu0r7JLvazdl52Lv7T3wi+IvxjmsNI8NaxYab4ZWDfeQXlw8Qnm3kgMEjYs
        AApAPGeeorPJMwwOXKVXEQbqX0sk7L5tGue5dj8ycaWHmlTtqm2rv5Jng/7Hnw11Pwz+0vrmn6kkLTeH
        LO4SaW3fzIxKzLGAre4Zzg4PByAQRX0/EONhXyuE6e1Rq197bnyvDmCqUM1nCpvTTvba+xxH7WvhTxL4
        R+M/iC8v5LgWGtym6tLlXPlzRYA2fVPulewx2Ir1MgxFDEYGnCG8NGuz7/Pc8riGhiMNj6kp3tPVPuu3
        y2PDy7rxmvprny4oJPXrRcD1X4TftA6j8FvDesWnh/RrD+3dSkG7W7oGSSKIAYjVOnBy2TkEnkHArwcw
        yqnmVWEq83yR+yur73Pey/N6mWUpxoQXPL7T3S7W/E+j/wBi/wCJWrar4a+JuteIdRuNUltGi1GSa5kL
        E/upd2PQYiUYHAAGK+P4jwdKnVw1KhFRTutPVf5n2nDOOq1KWJrV5OTVnr6P/I8Y+Evj34N6P4SvL74g
        eGbjXPFy30kieR5jC5jfDAsDIsYw24HPOMYB5r6PMMNmk6yhgqvLTt5aNfJs+Zy/FZTCg546k5Vbvvqn
        80j0zwz+3BZW+t6RoHhj4f6foWjz3cVvtE4TarOFLBERVU4Pv0rxa3DUpU51sRXcpJN7fq2z3KHFEFUh
        Qw+HUYtpb9/JJHaftg/tB+Lfg5rfh/T/AAzLa26XtrLNNJPbiVshgq4zwMc9u9ebw/lWFzCnUniE3Zq2
        tj1OIs3xWXVKcMO0rpt6XPm+6/bR+KF/Z3NpdavaTwXETwyI2nwgFWUg9FHY19hHh3LoyUowaa13Z8XL
        iXMpxcZTTT02R4ipG3jgV9Pc+bWwx/vGi4z0r4B+I08M+P8ARdQkfYlnqdrM5z0jZjE5/KSvns7p+1ws
        kux9NkFVU8Wmz7L+K8C6H8X9LvobH+076by5ka2tZ7i+giUgFYsERIp7lvfrX5jhXF4aUJP8Vb/M/UK8
        WsRGZyP7VvgK48Ux+MdMtbVZbrXdFg1WwimOA1zZvl0+vlvn8K9LJcUsPUpyk/di7P0f/BPPzXD+3hOP
        V6r1R8m+GvjF8TfAHh+x0a1+IOkaLp1mmyC0W0imMa9cZIyeSa+wr5ThcXN1pUpXl1vofL08xxGFgqcZ
        aRDxN8dPiH450S40S9+LcD6fcrsmt7e3S1Eq91LKAcGpo5Ng8NLnlSbLqZpiq8eVVUjV+Cfxi+JnwB0+
        az0ix07xx4QdzMdJMgYQt3aI9Vz3HSscwyvBY2XtXJwkaZdmGIwcXTl76O68Zf8ABQHx38RdAudE8JaJ
        aeD9ZKlJUlmMl2yYwRBkABvrz6V52H4ahRmqleXNHsd+Iz+VaLp0FZ9z5cjV/DGsWVxcSyXHiOCdbuDT
        rX940UobcGlbu27kivsZQjUoPDrSDPkeapCuqz1kdf46n+IfxU8QN4o8Y3VlY38sccf2i4CwnYhyg2j0
        rDDUcPgaXsKSunudGIq18bVVWs7OOx2yftK/EyzjSF/ivpkYRQoVNMiYAAY67a8f+w8JJuTpPU9SOcYi
        EeVTRzfjrx78Qfi3ZQW2r/EKz8SWVs3mxacwWCIsOhKAAE+lduCwOEwcueNO0v0OTFYrF4xKlKd0z7J/
        Zf8ACLeCYfD9rqEMdq/hjw613fhT8sd3eP5hXPqI1X86+Fzeu8XOc19uVl6I+vyygqDiukVf7zsPhl8P
        77SviM+v6np9jAbuF7tbm1vJkkYOx2iW3clehPzA8GvPxWKU6Co6326fmejh8O41nO+jPjL4yeMP7b8Y
        yatG2fO1W81GM99jSqiHPptgXFfp+T0XSw/I+yX4f8E/LM9r+0xKt0b/AD/4B9h/si6muv8Awh1TRFdR
        Npl/c24zyNkn7yM49MMK/OM9p+yxsZ97H6Zk9T22EsaXgPTYPGfwu8beC4wv2iEzQ+bklXkYEhgO2GHS
        ssTL2OJpV+jsaUYudCdHqj4P/astryHxj4R8dWs1xp0uvaZHFPcwN5bwX1uPJnXI6HIz+NfoOTOFXDVM
        HWV7PbyeqPic1U6NWGJouztZ+vU8h2PZauNTi8USW2rK286hDcss5J7lxyfxr3JUaU6UaHslyo8aFfE0
        ajrU6mrNHWL7xB47ijg1bxxea/ChyltqN+zpn/dJwfxrmo4LCYWUpRpWvsdNTFYzEQ5ZVCtqdj4y0uxs
        0nu9Tk02wcS2awTs8Nq46NGB9wj1FdFsHKpKTiry02IcsbGnFQbtErD4q+N3B/4rvxGx7j+0pP8AGs1l
        OCiv3dJOQ/7Wxt9ZWQ/wrqXjWR7p/D2ra5bG5k866uLW6dPOk/vO+fmNFfB4CcFGpFJoKOJx926cmat5
        c+LrfUIdR1Lxrew6rDGYo7t9RZriOM8lA+c4J7VlHC4P2Tpwp6PfQ2liMYqinKpqvMY3jLxLJw3xL1l/
        Y6nJ/jS/szBvVUtiP7Sx1/fqEvw58G3HxD+MXh3QTfSarPqF5G93eTSGU+Up3OSx7BQa0xM6eCwk5KPL
        pp5mdBVcZioyqy5tfuP0y8BaiLb4beOfGIjYLrl3PJZqqks1tGBBBgdeVXIHvX5PiIt4ilQWvLv67s/S
        qMfZ0Jylpd/gWPBN9/wrv9n++1e8mnYw2Vzfs11gSDIIUEDgHJ6UsS/rWPVNdWkaUm6OFm/I/PTxhPJ9
        utLeZiXtbSKN1J6MQZGH/fTmv2HAxVOjZf10PxfNKvtcVJ32MMxhkyOlehdHmLYhxt6EYouihN275TRc
        Azs4z0ouA9JcGi4BNN1b+7wKLgQ5/XmqQCHI5J+WmAqAZLL3qGwGLL8/ofei6AkMxQgjkmi4EkjgNgD5
        vWi4CYMn3uq1S2ARcls4pgKzkE+goANxPfH1oAerIFG7rQA1iCflPFADo5NoIoM3uNJLHNAhpds4Xgjr
        QAoO7px7UALv2kAsQfQVLAs5zznNK4DllKjFK4DshuSxB9KdwHRybTuDFinGDRcCRsk5wFzzii6Acspi
        HHes3uZvcA2x80iR7OXGQN5PUHtQBAUB/iz7mgBr4AxVp6Gi2IW+7VXKE42DLke1FwIu+Ac0XAa/SqRo
        thiuQKYyRW+UE8UGb3Gnk8HigQ5W2DPWgBrOZDu9aAHKeOSKls0WwK25yOy0rjJRNuGaLmb3HEIyZYc0
        XERtGpXjgelFzRbEO3bxxRdDHI5U4IAH96i4D2kOe7D1NF0Amd3NFwGyYIxyjeo70XAhII+8ADRcB6nj
        gii6AHcgDuBRdANc7mJouAlFwCi4Dl5icDnmi4DifQjpRdAGfcUXRm9wGT3ouhDRJhyOtUgJgA4yTzTA
        CMcVLAfG5U4xSuA9t5OQcA0XATcW+U/w96LgJ5m/k8UXAlQjaOaLgO8zbx/Wi4DxkDk80WMQz7iiwBvI
        96WgC5JGaNAJcHyxUPcBoBA5+76UgJYpuCoGFoAY46d6AJB0oAkQ/KKAFoIYnmbTzzGPvD1oJDzGHUUG
        q2J4juQGgD0r4EaeniTxdf8AhlrmOym1/TLjTreebOxZiFkTdjnBaMD8ehrxs1m6NCOItdQkpNeWz/M9
        vJ6ar4iWGvZ1IuKfnuvyse6f8K1h/ZX+DXijWdXvba68Za5A2l2ptiSsKycFYyQCSBl2OMfIo9z8r9de
        fY6lSpRapQfM79bd/wAl6n1/9nx4cy6tWrSTrVFyq3S/b836L5u8P/FP4HWXwsHgB73VbPTrpVN9eQ2s
        iSTygqWdmUEnJUDGCMADGKVbAZxLGfXlGLktldWS7DoZjkUcD/Z7lJRe7s7t99P6toek+EtV+Eur/DK5
        8A+EPGNpplrfQvb7jOI7uRpOHO2YAszDgjHTgYwMeLiIZnTxaxuKouTi77XWm22yR72GqZRVwTy/B11F
        STW9pO+/xWu2aXiH4F3Omfs83/w88KXcbXcqYF1fNs83MwkfcVBwSoKjj0z61jSzWNTM447ErTsumllv
        950VsnlSymWXYSWr6vrrd7fcfCHxB+GfiP4UapFYeJrD7HNMpkgdZFkSVQcEqykj8Oo9K/VcHjsPj4Oe
        HldLfyPxvHZdicumqeJjZvbqmcnJJJMcu5Y4wMntXeede5738B/g7osdraePfiLqFpo/hSFvMs7S8cB9
        QdT1CdWQEdACWx0x1+TzXMarbwWAi5VHu19n59/yPs8myuiksfmMlGktk/tW8u35+hk/tRfG3TfjJ4ss
        P7Ft5Y9I0qF4YZ5htacsQWYL/CvygAHn1x0G+RZZUy6jL2r96Wr8jn4izalmlePsF7kFZN9b9bdD6J+P
        fwb8XfEXSPAvhjQ5bey8Kadaq1/dTXASNGRFVSV+821A2MDHzHJHBr4/KcxwuDnXxFZN1JPRW73/AF3P
        uc5yvF46nh8LQaVKK95t6aJJab6K9vxMb4ieEvhD8cNJTTvCXifR9K8V6PGttZ3Ab7P54jG1Y23BfMXg
        YdN23qMjg9GDxGZ5ZP2mJpylTnq1va/XrZ+Ttc58bhspzamqeEqxjUhonte3TpdeavY5yCbTv2svAn/C
        Natc21h8VPDivHbXLSAx36rwx3DO4Nt+bGcHDD5SRXY1PIMR9YppvD1N1/L/AF077PU4U6fEeG+rVWli
        aez/AJrfnfr2eq0PmSX4ceI7fx9Z+DtQ02ex1m5uo7VbeZCCC7BQw7Fec7hxjnNfbLGYd4Z4qErxSbv6
        fqfC/Ua8cTHCVItTbSs/P9PM9T/bY0mDRfjDa2lqojto9GtUjX+6q70A/JRXhcM1HVwTlLfmf6M+h4pp
        xpY9Rjtyx/C6PIvAnj3Wfht4gj1rQpoYNQjRkWSe3jmCg4zgOpweOowevOCa+hxWDpYyn7Ksm4+rX5Hz
        eExlbA1fbUHaXmk/zNL4jfGPxt8W2iXxHrs19b253paoixQqfXYgAJ9zk+9YYPLMLgL/AFeFm+u7+9nT
        jczxmYW+s1LpdNl9yPYP2e/2SL7xZJb+J/HEZ0bwrCBOtrcHy5rtRyN2f9XEe7HBI6ddw+ezfiCFBPD4
        P3qj0utUv83/AE+x9Pk3Ds8RbEYxctNa2ejf+S/pdzn/AIh/FC38b/tQ6DeQ3cX/AAjWjazZ2WnCHAgj
        top0BZAOMMQzZ9COwFdWEwLwuUzg1784yb73ae/5HJjMdHFZvCaf7uEoqPaya2/M5T9qLw/quh/HLxY+
        pWk0CXt9Jc20siELNE2CpU9CACAcdCMHmu3JKtOrgKSpu9kk/JnDntGpSzCq6itdtrzRynw/+GfiT4la
        xa6boGlXF68zhGnWM+TCM8s79FA9/wCdehi8bQwVN1K0krfe/RHn4TA4jHVFToRbv9y9We3ftw+ArfwT
        rfgQWo+RNCj00yAY8z7MQoJ99rqPwFfM8M4qWJp13L+Zy/8AAv8Ahj6jijCRwtSgo/yKP/gP/Dni/wAH
        PFdh4O+JGi6prEfm6OXe1vkIJzbTRtDNwOT8kjdK+izGhPEYWdOl8W69U7r8UfN5dXhhsVCpVXu7P0as
        /wAGe9ftGeNPAWn+HfDnwt8BX9naeGFuBqGp6laM11HuI+UFlLNI3JY89oxkYIHzGT4bGzq1MxxsW6lr
        RT0/ysv+Cz6nOcVgoUqeW4KSVO95Na/53fV/JFDT/wBpTwt8GfBcnh34V6TcS6hdLm88SaxGqyyyYxuW
        IE8DJ2gkBe4Ykk6yybEZlXVfMprlW0Y7W9fz790YxzvD5Zh3h8sg+Z7zlu36fl27M4L4IfH3xF8HtZlN
        gV1PTL9iLnS7uXbFK5GA+4/cbOMt3HB7Y9fM8poZjTXP7so7Nbry8zxcrzjEZZVfJ70Zbp7N9/J/0zkd
        d8A+LNGunbUPDmp2DzOcCSxkRSTz8vGCORjHqK76WKw1Rfu6ifzR5tXBYqm/3lJr5M+v/F3he98G/sBH
        StQgktr1Le3mkhlGHQy6ikuGB5BAcZHavzzD14YjiP2kHdXa+6DX6H6RiaE8Nwx7KorOyf3zT/U+Hea/
        T9D8oE59RRoB9L+MdfvdH/Yp+GkFlcy2klxq1yzyQuUYhJ7ogZHPUqfwFfF4elCpn2Jc1e0V+KifdYmt
        Olw9hYwdryf4OR81Xby3dy9zPK800h3NJIxZmPqSetfZpRirJWR8PKTk7yd2dB4R8LeJfHxbRdCSTUWj
        /fjThdIhY4OWSNmG8467QSK5MRXw2E/e1tOl7fm0tPmduGw2Jxn7mhrbW1/yTevyO20r4YfFxZNJ8Nze
        HfFKaNHfpOtq1rP9kjkLAGQ8bB357c+tebUx2WWliFUhzWte6vbt3PYpYDNFyYeVOfLdO1na/fse8f8A
        BRJGNh4EfHyiW9BPuRBj+Rr5XhD4q/8A27+p9ZxkvdoP/F+h8VD/AFlfpJ+ZCyEsQtAH1h8Cv2StCvfC
        dn498fa3bDw88Au0soZvLjEfrPNxt9Ci85/izkV8Hmmf1oVngsFB897Xt18l+r+4/QMp4eozoRx2OmuS
        17X0t5v9F9/QwP2g/wBpy31y0t/B/wAOQ/h/wlYnBnsgbY3RGcBVXBWPknB5Y8kDFdWUZJKlJ4rH+9Ul
        31t/wfyOTOM8jVisJl/uU49Vpf8AyX5n0B4N+KWv+Kv2RJde8OXDT+LNMsDayOVE0olhIDsQc7nMXzjO
        eWHBr5PE4GhQzpUa6tTk79lZ/pfQ+tw2Pr4jI3Xw7vVjG3d3W/ztqea/sZN8RPFPxG1HxJreo6xdaELR
        4p5tRmkaOeUsuxEDHBK8nj7o443c+1xIsDh8LGhSjFTvpa10ut7d/wAfkeFwx/aGIxcsRWlJws73bs30
        tft+HzOD/bY+Jc3jH4ptoNu5Gm+HlNuo/vzsAZW/D5U/4AfWvW4ZwMcPg/bS+Kpr8un+fzPI4pxzxWN9
        gvhp6fN7/wCXyPBW1nUHt/Ie+uZID0iaZin5Zx2H5V9SqdNPmUVc+RdSo1yuTt6lLbtjce9a6GJ9i/8A
        BPFoXu/HiOR5/l2O0dyuZ9367a/O+L72oW2979D9L4LtzYhPf3f/AG45D9qaHSZfE+kfDX4faJm10QPN
        c2ulwtK8l1JgYbGWdlUAZOSC5HavRyF1PYzx+OnrPRNu2i/BXf5XPN4gVL20MuwFPSGrUVf3n+LaX52O
        m/Ze+AXxJ8HeKrbxTf3P/CHaNGubu2vCDJdwjko0WcKOvzOQV6gGuHPM2y/E0XhoL2kujWyfe/X0W53Z
        Bk+Y4WusVN+zh1T3a7NdPV7bnqPj/wCKvwv+Pthqfw6HjGXSrmadEgvFQrBcSqcqFc/K67sDBK7iBtPQ
        14OFwGYZTKOO9jzJLVdUvzTt626nv4zMctziM8v9tytvR9G157NX9L9D5M+KH7M/jz4X3UhuNMl1bShk
        pqemI0sW3/bAG6M/7wA9Ca+9wOdYPHL3Zcsuz0fy7/I/O8fkWNy+T5oc0e61Xz7fM8qDleDya90+dNzw
        Z4tk8Ga9FqqabpmrmNSBa6vbC4gPTkoe4xwa5cTQWJpum5OPnF2Z14XEPC1VVUIy8pK6+49c8Tftl+P/
        ABNo0Om2yaX4egikjkWTRoJIXwjBlTLSNhcgZAxkcHgkV4eH4cwNGbqSvNu/xNPf5LU+jxHFGPr01Tjy
        wSt8Ka2+b0PsnxPqFh8T/hFpGqyeL5vBGlajFBd3GoW1ylu4RkJaHzXOE+Y4J/2SO5r85oQngcbOmqPt
        JRukmm+u9lv/AME/T8ROnj8DCq63soys200tLbXe3/AIPiBd+DPBfwAk/to3HinwfDZwRLi486W9Qsgi
        IlVl3ZO07gQMDIqsJHF4nMl7K0Krb6WS3vpr9xGMlg8Llb9tepSSS3u5bW108tTzP9iU2Wl/Dzxt4gSJ
        7HSW1SR44pHL+VDFEHxuP3sB8E98V7nE/NUxVGhe8uVfNt2/Q8HhTkp4WviErR5n8klf9T5B1b4p+KNS
        8Qanq8WvapaT3lzJcEW95JGELsWwMEYAz+lffwwOHhTjScE0klql0PzWpmGJnVlVVRptt6N9S8fj18RU
        iWJfG+vFcbcm/kLfnnP41l/ZWBvf2MfuRr/a+YWt7eX/AIEzjb68utT1B7u5nlubudjJLPM5d5GJyWZj
        yST3NelGMYRUYqyR5c5yqSc5u7fVnuv7MP7QmjfBS21u21rRDdvdjzYb6zRTcFgOIXLEfuyQCMHgknBz
        x8tneUVsycJUp2tunt6+v5n12QZ1RypVI1qd76prf0fl+Ry/xd/aO8ZfF24lhurw6XobE7NJsnKxbe3m
        HrIen3uM9AK7svybC5ek4rmn/M9/l2PPzLPMXmTanLlh/Ktvn3+f3I6v9nT9nHV/ilGmpa/Ncab4Dim8
        91aQp9tdQQdg6AAZBk7DIBznHBnGc0sC/Z0UpVnp6ev+X3no5JkdXMEqlduNFO/+K3b9X93l7F8crTQv
        j1ouneAfhz4i0h77w/MHOleaYopY1jKKIXxtfYCeFJwCefX53K5VsqqSxuPpytNb7u976rdXPps2jQzi
        nHAZdUjem/h2TVraPZ28jU8K+FY/2P8A4Ca/rV/JBd+J7rDO0QynnH5IIgSBuVCxYnvl/asK+IfEOY06
        UNKa/Ldv1e33HTh8MuGssqVp2dR/nsl6Lf7z4OuLia8uZbm4d5biVzI80hzuYnJJ9ya/U4xUUorZH5BK
        Tk3KT1ZGTzyQfpxVEnsf7NfwAk+NPiiSa9eS38OaeVe9mThpSfuwofU4OT2HuRXzudZqstpJQ1nLby82
        fT5Fk7zWs3PSnHfz8l/Wh6z4HvtDsv2yL/w9pmj6fpuiizuNChhhhUbWSHc75/vsyOpY8kNg5rwcVCtP
        I416k3KV1Lfu9F6ao+iwk6EOIJYelBRhZwVl2Wr9XZq55b8DviNo3wO8Za5YeN/CMWrbJQglazjku7Ke
        MsPk8zGFbPPI6AivbzPB1s0oQnhKvL83Zp97HgZTjaOUYidPG0eb5JyTXa/c27H45H41fE+XQ/HEZn8H
        a9cra21mNofS3J2wTRPjKuCQGPRgzZBAArmnlf8AZuEVbCaVYK7f83dNdu3Y64Zv/auMdHGq9Ko7Jfy9
        E0+/fvrcxT4F8PfBH4rXnh34oaLNq+hzKPsuo2s0kTJGW+WdVRhuGAQynJBBxnHPT9ar5ng1Xy+fLNbp
        pPXtrt5M5PqeHyrHSw+Z0+aD2abWnRq2/mun5918dP2bPBfhz4YyeP8AwZr1xdafmJliklSeKZJHCfI4
        AIILcg56EcV5mV51i6+L+pYuCT18mrK+p62b5Dg8Pgvr2DqNx07NO7to/wDhz5eeUxo+Odxr7g/Px0o/
        drQBe0QN/a1htyp8+POeP4hWdX4JejNaX8SPqj9Cv2jL/RbFbB9a+Juq+CLcRsTp+jNie75+9hAXx2z9
        39a/IcnhWnzexwyqPvLZffp+p+155OhDl9vipUl2ju/u1/Q8z8A/Bj4U/Huy1NtK8UeMNTurBkE82pXK
        +YpfcUbDR7SDtccc8H1zXt4vM8yyqUfaUoRUtrLt8zwcHlWVZxGTpVaknHe711vbdep83fHf4Y2fwk8f
        TeH7PW49bSOJZWdU2PAWziOQZI3AYPB6MOB0r7DK8dPMMOq84cv6+aPh83wEMtxTw8KnNp93k/M8/PWv
        XPFGPHuGaAPXfgF+zrJ8ZUv9RufEFlomh6a4F47OGuAMbshCQFXGfnY4yDgHBr5/Nc4jlvLTjTcpy27f
        f38kfT5PkrzRSqSqKMI79/u6Lzf4nqPiX9o7QPhD4d/4QD4MWT3bh2EmtzDzTJM2Azxrj945wBuIC8DC
        kYrxKOTVswq/Xc2lb+7tp59l5b93c9+vndDLaX1HJ43/AL2+vdd357dlY8r8H/CD4y+KfEsPiPS9H1mH
        WPO+0f2vqB+zMX/v75SN34Zr3sTmGVUKLoVJx5bW5Vr8rI+fw2W5viKyxFOElK9+Z6fO7Prn4H+BvGvw
        un1LW/ib8QRfR3UAiisrvUnlghO4EuWlICsAMYUY5PPSvz/NMVg8co0cvw9rPdRSb8tP1P0bKsJjMA5V
        syxF7rROTaXnr19DzvxV+zV8MPid421nW7b4qWrXOpXcly9ra3trNsdzkqMNnAJ4HpXrUM5zDBUIUpYV
        2ikrtSW3yPIr5JluOxE60cUrybdk4vf5mF8Sf2F7Lwx8PNV1rw9r95q2o2UP2tYLhEWOWFRucAj+Lbkj
        nnGO+a68FxRKviY0a9NRi9Lq+j6HLjuFYUMLOtQqOUoq9nazXU+QgRhue1foJ+dHvXwU8Y/BXwn8P5r3
        xl4ZfXPGEF0yxW5WSVbiIgFDhmESgHIORnjoc18pmWHzbEYlQwtTlptb6Kz/ADPrcsxOUYfDOeLpc1VP
        bV3XT+7+p6NpH7dNvbahpmj+G/h/YaFpsl1FE3+kDaI2YAkRxxoFOCe5rx6nC8pRlVr13KVn06+rbPap
        8VRjKNLD4dRjddenokjI/az8X+Otf+PLeC/DWpauYvs8EMGl6dO8ayu6b2LBSAeG5LcADsK6Mgw+DpZd
        9bxEY7tttJ2s7f1Y5+IMRja2ZfVMPKWySSbV7q/T9Tdu9a0v9jP4SXmi219b6h8U9fUSXBgO/wCy8EKz
        eioGbbn7zEnG3OOWNOpxHjFVlFrDw28/+H69l5nVKpT4awToxkniJ726f8N07vyON+EHxMl/aCv1+GXx
        OuZdWt9RLS6Vq3ypdWVyqEgBwMFWUMMMDzgdDx6OYYJZRH+0MvXK4/FHo0/8jzcuxzziX9n5i+ZS+GXV
        Nefmc18Uv2NPH/gG6mm0yybxXpAyUutNTMwHo8GSwP8Au7h7114HiLBYtJVHyS7Pb79vvsceO4bxuEbd
        OPtI91v81v8Adc8NmtpbKZ7eeJ4LmNirxSqVZSOoIPINfURkpLmi7o+VlFxfLJWYxgQBnrTEfUn7LV3a
        6X8CPjdcy39vbzy6a0MaSyBDu+zT7Ov95nwPUivh88jKeYYOKi2lL9Vf8j7vIZRp5djZOSTcf/bZW/M+
        VufSvuD4Q2PCdwbHxPo0xAG28hfn2cGsK65qU15P8jfDvlrQfmvzPpz/AIKFzbvH/heHOdumM23HTMrD
        /wBl/Svi+EV/s1V/3v0PuOMH/tNJf3f1Pk1gdx4r7s+AHxx5Uk5FBa2IyuDgc0FGj4eult9SWOR/LguV
        a3kfP3AwwG/A4P4VzYin7Sm0dWGqujVjNH6W/Cr4iaf4l+EmmeNdVEp1PSLN7TUFgyz+dF8si7B94sVB
        H+8K/EcZh50sVLDx+07o/csPXp18Oqy6FDxbql58SfCiazp2i3Ol+LPDUw1GPR710M0sDKQ8LhSQvmxF
        htPIOKqjBYeXLN+5PS/9eYpy+tQUoKzWq/yPgH4o/AL4eeDfE0d9feP5dH0DxEraloyjT2k2ws3zRM/T
        dG2VK9Riv0XBZjVrU/ZqPvQ0a/X5nxOMy6nGXtebRmRp3wH+H3iT93onxe0t7ljgR6hF5WT+OK7Z5nia
        S96ldHJDLqFXaoO1j9l34qeALX+2fDm3XrGP5xd+H7nzGx6lM8/SnDNcNiV7KquX1B5bXpP2lOVyj4a8
        X6B8WL2Hw346jXw14nVxFY+JoY/IaKbstwvGOe5oqwqUF7bC+/FdP8iqThXl7PEe6+4zxB420L4aXcvh
        f4ew/wBueIC5ivPEskRnmuZ8/MLdecjPenSjUxEfrNd8sX07f8EU5KlLkw8eZ9zR0f8AZW+KHja2Gs+J
        Xi8O2Uo3m68QXWx8euzPFZyzPB4a8KKcm+wf2bXq+/XlYi1H4H/Dnw2TFrHxf043K8NHp8HmgH8M1ccw
        xFZWpUn8xPL6ENXU1Nr4U/Az4e+KPEkms2fji41zw94a2ahqsDac0RlAb93Ar9N8jgAL1Oa48fmWJpx9
        nKCU5qy8l1OzBZfTcvbRei/E++NJ8K+JdL+GF/JDaWtx4t8QTm/1C0upPLjCvwLfdg4VI9qfQHFfnEq9
        OdePN8MNv8z7SFGdOg7by3X6HG6tNJ8HPgVq1xFC1r4m1Njp1qjTSSASyEpGIxISyIoLNt9BmuylH63j
        Ix3itTmqP6rh3U2Z8L+JL9JtWMSt5lvbItvAw7ogwD+OM/jX7DQp+zh5vU/FMXV9tWlI+nv2J/iCmjeN
        4dLuZAtvrtv9kYs3H2qEZj/Fozj8K+D4mwbnTdVdNT9D4Xxit7KT8j6LvbiX4Z/F+C6u9Ugg8O62pijt
        CpDRzEjGAPlC57nk5r49WxWE5baxPr21h8Trszx79qD4IReJYtZ8IBVgTX521rwxdNwkGqqv761J7CZR
        uHqc16+V4+VGUK/8ukvOPR/I4sdg4zjOk9par16r5nyp+zT4P8DePZ9R8LeKdMt9O8Y6a7lhfzGITKpw
        6nJADoe3pX2eZYivRiq1F3i+x87gMNhZtwrRSfmz1fVv2evg1IzQT6zodpMeMw6soYfT5sV5EcyzHf2d
        16HqPLsuejlZ+pnQfskzhjP8NfiRbPcgZWxnu47iJ/Y4Of0rf+2JJWxFKy72M/7MhF3oVLs868U/CzxD
        o/i2z07xV8IdRuvF8xxZjRMjTtTP96QjhcdTgjNd1PHU61Nyp1lGK89TllgeSd6lK8vwPQ0/ZU8c6vZx
        z+P/ABPpvgbTeq6Np0qQiJf7pYkc/nXDLNqC1owc5dzr/s2rNfvJqEexZsP2cPg3pr+VceJtK1C5J5a6
        1hCSfwOKh5njp/Zd/Qp5bgaekpL7zM+Mfwz+E3ws8Az69Nb6XqMsuYdPt7G98wzzY7lWOFXqSa2weKxu
        Kr+xd/O5GKweDoUfaJK/Sw39kr4Q6hp+hx6tJCbXxX43jex0iMg7rDS8/wCk3p/ugj5EJ65rjznMFVlZ
        O8Ke77vov1MsswPJHmf29j67+JMFnqNz4Z+GmiXUunPbJFcjyMr5cMWAgLDkZwfr3xXyeGvBVcXNXT6+
        Z9FiGqtSFBdDnv2sfGMOm+DNO8NGT59Xl867A4Is4PmkJ/3iAPfNbZHhpV63tXvH9TDN8QsPhuXb/gHw
        Nql8dS1G6vLhS0k8jSYA6ZPSv2aEeSKiuh+Gzk5ycn1IFPlgEEkn+GrsUthJYx5b5AX2FAyE4HGaACgA
        oAeqbh70WAa2xWwRzVIBGRWXI4FMBqnyxx1qWA1pFkJJU7+5xSAIyM9RQBOJCBgKCPWiyAXeSdmMBuap
        AGXbnPHSmAH5SN33R94HvQBFLnIz1oAC2Tt7UAPQbTigB0vUUGb3FOevagQ3oxzQA5pADgA7vWgBy5C7
        ifmqWAvm5pWAfGdxzQA9nIOKAFjl5oAe0vNACCUnp+lZsze5IjkHoRSJJ0bO4mgdiJkBOc0BYjbGcL97
        1rRbGi2E8vJ+Y/NTGQzRDJoArlinyj7/APCfSgLClgyAiqRothFB2imMjkyGyx+Wgze45ZABhelAhXyw
        Ur170AI5BY4oAjA3uR021LNFsTJJuyCaQxybVUAfe9aDN7jg5HB5P1osIcTuSg0WxE/C88UDGF9yqP7t
        ADjOzHJ+6e1FgGiYbvl6UWAmB3DNAEMvegBkUqqCNgLetADUmLv5Z4Dc0ASE5P6UAMftQA6gBwnEQAX7
        x+9RYBGwTlRgUAKhQNyOaDNjnYISV6GgRG4AOB971qkAqHnk5NMCepYBh+xwKQEiKzL85BAoAVpAEyv8
        XagCImNTg8mgCSJkwSfun7ooAASowTzQBMDux70XADGG5ouBIoIUDNZvczZIoyAmfvdaRIfOehwPrQAc
        9zk0AChg+T92gCZZo1JGMUAIMkZxhewoAXjqOBQAUAOjwDluR2oAkYNnLHI9qAGmTBwBxQBZ03VLnTL+
        3u7SVra5t5FlilQ4ZHU5VgfUEConCNSLhJXTLhOVOSnB2a1R2PxU+MXiP4uavb3viC4jb7NF5UFvboUh
        j/vMFyfmYjJP0HQADz8Dl2Hy6DhQW+7e/wDSPTzDM8Tmc1PEPbZLb+n1OT0ue2gv7eW9t2u7NXBmgSTy
        2dO4DYO046HBx6HpXoTUnFqDs+j3PNpuMZpzV11W34n1x8BPgD8MvF+t2HifRvE91rEFk63DaBfpGtxD
        IDlRNg/MoOOi7Wx1IyK/Ps2zbMMPTlh6tJRb05lezXl/w90fpWTZNlmJqRxNGq5KOvK7XT8/+GszD/aG
        /ar8Sab8UZbDwZqxsdO0Ym2kKokiXUwP7wsGBBUEbR9CQea6coyHDzwani4XlPX0XT/M5M64ixMMa6eD
        naMNOju+v+X4nkXxn+OupfG5PD8mq6dbWN3pkMkUklszbZmcqS20/d+6OMnvX0GW5XTyz2ipybUmt+lv
        zPm81zepm3s3Vik4p7db/keZ17Z4A+SV5du92faoVdxzgDoB7Ukkthtt7kD/AHjTEez/ABG/an8XfETw
        ra+Hf3WkaUltHBdJakmS7KqAS7nkKSM7Rgc4JavnMFkWFwdZ1/ildtX6enn5/kfUY/iHF42gsP8ADGyT
        tu/V9vL77nibvhiK+jPlyxYajdaRdwX9jdS2l5A4kingco8bA5BUjkGonCNSLhNXT6GkJypyU4OzWzR9
        ZfCj9t2x/wBAh+I+lLc3tsCkHiCzt1aRQeCXTqvuY+v93vXwOP4amuaWBlZPeLf5P/P7z9Gy7iqD5Y5h
        C8ltJLX5r/L7jyH9qv4l6H8Tvim2r6DdNfaWljDbxzmJo9zDcW4YA8Fscjt6V9BkWDq4HCeyrq0rt9/y
        PmuIcdRx+N9rQd42S2t+Z46pJGSRmvpVsfPLYfZ6jcaVfRXVrK0NzC6yxSocMjKcgg+oIzSklOLjJXTN
        IycJKUXZo3fFfxQ8XeOE8rXvEmp6rADkQXNy7RA+uzO39K46GCwuFd6NNRfktfvOzEY/FYpWr1HJeb0+
        45MylGOF/Gu65wn1Z4C/b41bQvCtppPiLwtF4kuLVFiF618YHlVfumRTG+5uB82RnGetfCYrhalVrOrQ
        q8ifS17emq0PvcLxZVo0VSr0udrre1/XR6m3ff8ABRm7kUpZeBIIJf70+qGVfyES/wA65o8IQT9+vf8A
        7dt+rOqfGUmvcoW9ZX/RHhfxz/aH1z48S6UNXsNO0+DTPNMCWSPuPmbd25mY5+4vTH419PlmU0crUvZS
        bcrXv5enqfLZpnFbNXD2sUlG9redu/oeVV7tzwR6uVGKLgSxpvO496LgOY/MUouB7H8J/wBqrxz8J4It
        Oguo9a0WLCpp+pZcRL6RuCGQegyVHpXzmPyLB49ubXLJ9V19Vs/z8z6TL8/xmXpQT5odn09Huvy8j1X4
        mftmeHvij8Jde8N3nhzUdN1W/hRYvKkjmtw6yK4LOSrAZXsprwcHw7XwONhXhUTjH1T2ttr+Z7mP4moY
        /BVMPOm4ykvJrdPfR/gfJz9K+8PzkjUrjBHNAFuTVbu5sobKS7nks7csYbZ5WMcRY5YqpOBk9cdahQgp
        OaWr3Zo6k5RUG3ZbLoiqAcVYLYWKeS2uEmhkaKWNgySIxDKR0II6Gk0pKzLTcXdbn0F8NP22vHHgi3is
        tZWLxbYJgA3zlLpR6CYZz9XVj718rjOGsHivfpfu5eW33f5NH2GB4oxmFShV/eR89/v/AM0x/wC03+0V
        4f8Ajp4V8ORadp99p2p2FzK88N0FKBWUD5XU88gdQOlGSZRWyutUc5Jxkla3+Q88zmhmtGmqcWpRbvf/
        ADPnXAHzZFfYXPjQDbhmi4G5L491+TwnF4UfVbhvD0NwbuPTy37tZCOT646nGcZJOMkmuVYaiq7xKj77
        Vr+R1PFV3QWGc3yJ3t5mA481zntXVc5T2j9mn9oS4+B2vXP22Ge/8O364urSEjerj7kiAkDd2IyMg+wr
        5zOsphmlJcjtOOz/ADTPpMkziWVVXzJuEt1+TR7Xrf8AwULAkdNI8Flk/hmvb/BP1RU+n8VfN0uEVa9W
        t9y/Vv8AQ+nq8Za2pUfvf6JfqfJfjLxPc+NfFmr6/dpFDc6ldSXUkcQ+RC7E7RnnAzjmvusPQjhqUKMd
        opL7j89xNeWKrTrz3k2/vMj5vWug5g+b1oM2dd8Nvir4j+FF/qd34cuktbi/tGtJHePftUkEMuejAjg8
        9TxXn4zAUMfGMa6uou/9eR6GBzDEZdKU8O7OSt/XmVPDPxC8S+CdXm1XQ9bvdN1CbPnTxSnM2Tk7wch+
        efmzzWtfCUMTBU60E0tvL07GWHxuIwtR1aM3GT3ff17/ADNvxl8ffiF8Q9M+wa/4nurzTyAHto0jgjkH
        +2saqH/4FmuTDZVgsJPno00n31f3XvY7MVnGPxsPZ16rce2i++yV/mcBvAPy9K9Y8Y+wPhf+3bYeGfBe
        k6P4l0TUtQv7GAW7X1tKjmcLwjMHIOduATk5Iz34/PsdwxOtXlVoTSTd7Pp9x+lZfxbChh4UcRBtxVrp
        rXtuZnxI/aS+EHxHsbhr34b3dzqMinF6DDazg9j5qFmPPZgR7GujBZPmeDkuTEJR7atfcznx+eZTjYvn
        wzcn10T+9X/G58rgxhzxj619yfnwrsUO5The1Aj6L+CPxl8D3/w6k8BfFeGa40OyuPt+mzL5zANzmE+V
        8w5ZiD0+dgcYFfH5nl2MjifruXO02rS2+/XT19D7fKszwUsI8BmivCLvHf7tNe9ump6P4g/bg8EadpUW
        h6H4Hn1fRoI0t0tr5o7eARqAFCptk4AAwCB0rx6XDOLnN1q1blk9bq7d/XQ9utxXgoQVGhQcoLSzslZe
        Wpl6z+0B8O7f9m3XtB8FRSaBql7uh/sWYMXQzyfvmV+QybC4GDwAowK3pZTjnmkK2LfNFa83otNO97HP
        VznL45RUoYNckpacr/vPXXta/wDkfIpYx9TktX6CfmoEBeBw1ACFjH1OSaAFwF+lABx60AdZ4j+K/i7x
        Zpdvpmqa/eT6ZBGsUdjGwit1VRhR5aAKcADGRXBRwGFw83Up00pPru/vep6VfMcXiYKnVqNxXTZfcrI5
        izup7S6iuLWeS2uIGDxzQuVdGHQgjkH6V2yippxkrpnnxlKElKLs0d344+PXjL4keENP8OeINSGoWVnO
        LhZWjAmkYKVXewxuwGPJGeckmvKw2VYXB1pV6EbNq3l8j2MXnGMx1COHxErpO/n8+55+zbDgV654obkI
        yw5+lAHqPwd/aL8U/BeKa10j7Ld6RPN58theR5UuVCllYEMpwqjrjgcV4eY5PhsyalVupJWuv6sfQZZn
        eKypOFKzi3dp9/zOXn+Iuqt8RpfG1uyWmrvqT6mojHyJI0hfbjuvOMHqOtdywdP6qsJLWPLy/hY8946r
        9ceNjpLm5vne/wBx9nH4s/Af4y6Jaaj4uj0iDV2iUXEN/C0dxC2OUEqgFlHYg4xjoeK/N/qGcZdUdPDc
        zj0s9H8uh+pf2jkeaU1UxfKpW1utV5X6/eT+HfBH7NWkahZ6tp1/4ZiuraRZYWufEDNtdTkHZLMQcEdx
        U1sVn9SLpzjOz3tD9VEqhhOHKU41acoXWqvP9HIxf2v9Y+Hvj/4ZNeWXirQr/wAQaTKktnFZ6hDNNKrs
        qyRhVYkgghunVB05rp4ep43CYvknSkoS3umlps9fu+Zy8S1MBjcHzwrRc4PS0k276NaP5/I+LIvEWqpo
        kuipqV1Ho0sonk08TMIGkHRimcZ98dh6Cv0l0aTqKs4rmWl7a/eflir1VSdFSfI9bX0v6FIYXjNbGAnz
        yuI1PynmgC9Z3fkXdtO5yY5FY/gQama5otFwfLJS7H3v8f8A4T/Dr4geJdP1/wAWeN4/DzpYJbRRC8gi
        86MO7qy7wSf9Y3TPb05/J8pzDHYSlKhhqPPrfZuzsl09D9kznLcvxtaOIxVfk0tuldXb6+pa8AePPgp8
        IfD1zpXhvxTpkO4mSW4klaaSaQDAZmA+b2A49BzWeLwubZjVVWvSb8tkkaYPGZNllJ0sPVS873bfn/wD
        899V1O61nU7u/vp3ury6laaaaQ5aR2OWY+5Jr9bhCNOKhBWS0R+MVKkqs3Um7t6tlXvjvVmYpPy0AIk0
        sCyeXI6LINrqrEBhnOD68gUmk9yk2rpMv+G/FF94T1zT9Z0uc2upWMomgnChtrD2III9jWVajDEU5Uqi
        vF6M1oV6mGqxrUnaUdUbvij42ePPF1zJcap4s1W4wciGO5aKIH2jTCj8BXHRy3B4dWp0kvld/e9Tur5r
        jsS71a0n87L7locfPcT3cm+aV5nx96Rix/M16CioqyR5kpOTvJ3K7cMc1RJoab4n1nSIJrbT9WvrGCZG
        jkjtrl41dSMMrBSMgjqDWM6NKo05xTa7pG8K9WknGnNpPs2jOwi8EZP0rpT0IWw1+QCBxVXKJ7S6NreQ
        SqA3lOrgHvg5qZe9FruVGXLJS7Ho/wAXPjdeeNvitqPjDw7JqHhma7tordvIuikoVUVWG9MHB2jjvXi5
        flsMNg44WvaaTb1Wm/Znt5hmk8VjJYuheDaS0eu3dHmNxcS3c8k88rzTSMXeSRizMx5JJPJNe0rRVloj
        w5ScneTuyzouuXvhrV7HVdMumtNQs5VngnTGUdTkHng/jUVYQrQdOorxejNKVWdCpGrTdpLVM900n9un
        4o6YAtxcaVq23GWvLEKW+vlFK+XqcMZdP4U4+j/zufVU+Ksxh8TUvVf5WPOPi78aNc+NOp2moa9Y6VbX
        VsjRrPp9r5TOpIwHYszMBjgE8ZPqa9fL8upZbBwoybT7u/3HjZjmdbM5qdaKTXZW+/8AQ4NNuOH3n0Ne
        tc81bDs57AH0FFxipKFLbuR2ouZvctaIkk+q2gRsTGZFXJxyWGOe1Z1JJQbfYumm5xS7n0x/wUDGPi1o
        TbwQdEjG3PTE8/P6/pXxnCT/ANjmv7z/ACR9rxev9tg/7i/Nny6wcsdp4+tfb3PhhvmsDtY5AouAuFX9
        4pJK9FouA1sy7sgLjnFFzRbH0v8Asm/GuDwt4i/svWnUaFruyzvmc/Lb3QG2GY+iyL8jH+8FNfA5/lzq
        L21H4lt+p+kcOZjFr6tM+ofB/wAF9W8F+OLzVtP1a10/RmmZ4tMtlcrIrEbnnZiTJIRkAk4XjAr4eri4
        1qKpyjd9z7SGGnCq5RdonmH7Q3wS8P8Aibw3qyu4v/AN/O1zJc6aBPN4dv8AobqILndC3/LWMdOo716e
        XY+tSknF2qLTX7S7eq6HJjMLRnGV9Yvt0Z+bPxY+EfiH4PazFZa9bxXFldL5mn61ZnzLLUIuzxSDjOOq
        9RX6dg8wp46HuPVbp7r1R8Ti8vq4SV3s+xV8BfFzxh8L9SjvvCviG90maMgmJZC8L+zIeCKrEYKhi48s
        op+ZlRxdahLe6PqDQ/Engb9unT/+Ef16ysPAfxpSI/2drFsu201Ugfcde5P93r6HtXydSOJ4fn7ak26P
        VdUfS044bNo8jVpjfEPjTwL+xDYP4X8HWdj42+L5jC6r4hvUEltprkcxxr6j+6PxPaqpUcVnc/b17wpb
        pLr5sdWph8qh7OnrI+XvHPxU8W/EvUpL7xT4gvtYuJGztllKxL7Kg4Ar63DYShQSjhopep8xWxVbENty
        0ND4T/CHXvi/qtxb6NHDY6TZDzNS168+Sy0+L+JpJOhb0Qck1jjsfRwUU5u8nslubYXL6mJfM/h8z9G/
        gp8JtC8CeENMvDbTWvgfSZluLGK9UR3GuX7fKt7cA/dXJxFGemcmvy7G4meKqtLWct/Jdl+rPt6GGp0K
        adrRX59z0Lw1f+Jr/wAb6jeHV9K1PTGmNtqGnmBobvTXUbo03Z2yEA4JxgjmvMreyVFU3Hlk9nvc6sPz
        ubq8149fI+Y/2mfjGvirxA66fOZNJ0zzbLTnU5FxcH5bi5H+yo/dof8AeIr7rIMt5IKVRe91/wAj4ziL
        M96VN7/1c+bDk/vK/QLn5udJ4K1ubS9Si8u5aylMiS29yDjyLhDmJ/pn5T7Ma8/G0ViKTj/Vup6eX4p4
        Sup9D9F9K1O0/aV+EFve24gtvEFq22WKVA32S9QfMpH909R7EGvyCaeU4pxkrxf4pn7OnDH4ZVF8RB4P
        1XTfjF4R1DwB4qSax8Q6aRGRK2LiN0/1dxG/98YByP5VOIoywk1iaTvF/wBWJw9T20XQr/EfKv7S37Mm
        oePdcdwtvpXxUhjO2QHybPxZCowJI26R3WOGQ/er6jLMzhhoc0veovp1h/wDy8ZgVianKvdmuvRnwprW
        jXPhzV7nStX06bTNUtnKT2V5GUljb0IP86+8oVqVaKlT1XQ+OrUa1GTjM7H4N+Ck8f8AiqbTY/ES+GJo
        bSW7ikVnEtw6Lny4wp6+pPQVxY6ssND2ihzeR14LD1a0vdnY+rPB03xS8PeFbPT4PjTeWvh3UIHiF3dw
        xyXBugiMsNlK3UP5m0E85U18pV+p1Z831fVdn+Z9TH20Icjlc8J+Onwm1rwb4S07xNrninVtb1K8uRDe
        WWqhg8Bddy7hn5SOhz17V7uX4qni6rpUoJWPFx2GlCmpOTPDGaBMbkVWY4AHVj6AdzX0c3GMeWa+Z8/G
        NSTtHU+m/gP+y9PcS6R4k8f6VdGzuHDaJ4MQkX2tSdVZ0P8AqbcdWc4yK+OzDNYRUsPhXZrefZf5n0+D
        y6UEqld37I+/tKtI/hB4f1DxN4gaC+8X6hEFeGzAEcKIMx2duvaKMdf7xBNfAtzxtRUKStCOv/Bfmz6b
        3cJBynu+nZ+XkUPhlpE+hWWs+OPFky2upagj3Mss6hTaWo+bk+mOg9MCtcZUVSpHC4b4Vp6snBQ9nGWI
        xG/Q+P8A45fE2bx74jv9TbfGdRCxWls3W209D+7Ujs0h+c/hX6JkeBjhqact1+J+c5/mLry9kvmeViTb
        GBX1dz40j3Z5yKLoCNgd2SQVouAj4ONo4ouAFtx29qLgLt28UXAb5gVyAMN60XAUEtISeTRcAflHouAd
        H546fyouAk+SvynB70XArDBHHSi4FiH/AFYouA/eRx2pXAegYqJAf3f8Qp3AYSSSZPmPb2ouAwHD8kUX
        AeTk0XAYz4YCi4E+S3OaLgG458v+9RcA3KTlwdo4YevpRcCN3KsQOnalcBynKg5Ap3AdzRdAPilMTN70
        XM3uTDHljFFxEQ++aLgWUZAoyOaLgG9VbKDBouBKHZxljzRdANkV2G0Hhuaze4DeRGN3WkA2PrVp6AOY
        BTuzVXAhlO/J60XNFsVzmi4w59RRdAI7kbR1ougGviRzv5B6UXAaYvJ6kZougASg/wAR/ClcBQc85zTu
        AZTuMmi4EUr4I2jii4D0YHOaLgRlnB46UrgOjeT1ouBISZiVbtTugCi4Axwu7uvFFwEXgUXAQTMjkdVo
        uBMJo5OopXAVrdWXIIA+tO4FZ4/LY45ougHI2VBNFwF3D1ouBJbvGrv5nfpRcBhZMnj5vWlcB6g7RTug
        Gt1ouA3gHJ+5/EPWlcB6LvXBp3Aa0XlsSOfpRcB6F2dCDjrRcze4BivB65pXESKcqCadwGM+DxSuAbN/
        PrRctbEka7ATTuigWVsfc3e9FzN7lhZdq7u6cUCJUPyjkc80AO5rN7mbGj71IViY8deKAsIpG7rQFhzh
        yxwePrQFhqruc+ZzjpQFhTMzMVPOO9Ag8w/dxx60ASKMKM0ASIQVHNA7C+btOMigQobdzmgBPMC8NyO1
        A7A2WCk8mgQrOV+goHqWdM1m90S+ivdOvJ7C8iOY7i1laORD6hlwRUTpwqxcKiTT6PUunUnSkp05NNdV
        oys7G4Ys5LMTkknkmr2I31YZJ68fWgQgJLEdvWgBxABIHP0oHYif7xoCxHI+BigQxTuGaB2GtnPBoERy
        dD60DsN/5ZigQf8ALMVotjRbCLwozxTKGtyTjmjQCN+Vo0AjHSjQLDvL3/dOD3o0ANofgcBaNAE3n0pa
        APjyxzimBOOlACDh6ADr5mOelAErkYXms3uZsU/WkSBXb83egCNmLNkgD370AOT7ow2R6mg1Ww1lYHcD
        QMTcSMseatbAMlbYOO9VoAxQFGM0ADFnAVTigCUbUAVuZB1NAC596AEA3uR/doAVpST0oARTl8nis3uA
        5nIPApAPQkqD0oM2MZm3YTII6n1oJHKcjJ4X0oAdweV6UAIv3jQA5s54oAbuI4oAY0hyeKAHgjywXGc9
        KB2EDFRg0CJomBBOaAAYI4+9QAjPtCj+Id6AFJJPzdaADrQAZydtAAV28UAFABjPUlPQjvQBIpOMsAB6
        CgdhcqenSgLAM9z8vagLEbgFtgGA3NAiaFvkJJ9qAInHzGgdhvHQcNQIemQoz1oAdQBGw+Y0AT2xMeD6
        0AS3SbSCOfpQA3e0gySSenNAyJz5bZ/vUCArhcUDsORk8oKB++P3T6UCIXOxiR360AIQFUYOT/doHYjY
        PKu3hQO1AhqgKo3Ak+tA7BhT0YgelAWGNGCc5z70BYco2rjIoENY89atbGq2E3lTgEk/3e1UMjlJJBI2
        n0oAQDLmgBWTc1GgB8i8Ec0ARs+GO0cUWAaTnk8UAKCccKCPWloaLYerJtG/5D7d6egxr8sSBgego0M2
        Kg2nd3o0ESk+cxdmOSMcnt2o0AYBtGKNAFSMSluRxRoA0GjQBjctRoaLYsaZqH9mXZk8vzYpFMc0LHiV
        D1U/49jg1nUpxqRszejVlQmqkN0fb3wB+PVp438Kt8PfFWrSx/bYGstK11n2POhXH2eVv4Z1HAP8YAI5
        r8qzfKp4ap9apR06rz7+jP17K80hj6PspytI7nwt4b8X/Dvx3Jo9kulpoT6eGitVRo7ZYosqkEYJ5lfJ
        Z5G7Y4rx51KFalzWd7/P19D1IwqYeXLF6MxJfh14c+K3h3Uf+EMWwudIuJJGv/CWtwGTTJ5A215IGHML
        bgQHTg4ziuj6zWw0oqto+kl8Xz7/ADEqdKsn7P5pnyl8Tf2HtBgupZLO41r4bXWSfses27ajphP/AEzu
        ossF/wB8V9Thc+rL3bKa8tH9zPErZdSl05GeUt+x98QdL1O3vND8ReE9RltpRLb3VjryQyxuOQwDgMpr
        2FnGHqL2dSDs901c4I4FwlelU19Qj/Y88e399Pc674j8I6U88hkmuLzXFnkd2OWYqgLMSaTznDw+GDbW
        1lZWBZe6jvUqI9Y+GX7EOgzTxy3kms/Eq5H/AC76dbtpmlKf+mlxL87L7KvNePjc8q1LptU197f3HoUM
        BRuuWLk/wPp0eE/DXwu0a2Hib7BdxaWBcWPgzw/DssrbbgtJsPNxIg+Ys5JwCQK+W9vWxLfsFa+8nu/8
        vkew1To613e2yRe8ZaXefFTxDcW8c66j4bkFvNbX1pcfuDEygy2s8X8YYfMrLypx0xWNKpDBxS2lqvO/
        dFuDrzTjrF/1qec/G/4v6V4U0S88IeFLpre1iHkarq0cvmSqMY+yRSE5eZh8rPn5Fz3r18ryypipxr4i
        Oq2XbzPIzPMaeBpOFN/8E+QdS1afVrgT7Vhj2iOGBPuxRjhUX2A/Ov1KjSjSjyo/JK1WVabnLqVdu3gu
        c+1baGJIECqGb5gelGgHtP7P3xy1P4Z+KU1CFZb0SKsOpacrf8f8C9HQf89ox0/vDivk86yqOLhzLp+B
        9pkebyw0vZT1TPtTxP4Z0/4xaLpfjrwDq0S6qqiW2uUYhJyAfkkA5DDpz06GvzqjWngpPC4mN159PQ/Q
        69BYq2Kw795GbpPjzQ/ibp7eCviZo39n6xGSpN2vlo8if8tIZB9xx1BU/jVTwk8O/bYKV4mdPFxqr2WM
        Vmcb8YP2XW8WWCw6vo1t8TdJjXFvcySi11y1TsEuR8swA7PiuzB5mqLtCTpy++P3dC62EU1r76/E+U77
        9kaz8Ga+dU8J+P77wbqkaSRpZeM9JkjMauCrKJkDI3Bxmvq3mtSpHlrQUo94u/52PHWEjSm/ZvlfmRw/
        Br4wWr6X9n+IPw7uLPTYfJto3uovJHTEpjZOZBtXD4zwKx+tYXX91LXy/wCCWqdSLuqiLmp/AnxV8QtN
        t9J8f/GbTdStopVmkg8P2Muo31y4GF8x1Qbyo4XJ4FQsXSwrdTD0Gn3eiLqRddWqVOb0PZPg5+yTpvhO
        5hvPDXg82V4o48U+Nws9yp/vW9kuVU+hc8V5WNzadX3ak7r+WO3zZ04fBJfwY/eez32o+FPgibq6M0/i
        XxrfKBNcXEokvbo9QpbpEnoi4Hsa8OMa2O+zyU18jrlOlhXeD5qhnaB4U1Txtf2nibx/aQpcWpaWw03f
        8tsp5Bl7EAdAfxrSvXo0EsPhpO73aFSozxL9titLHi37RHx1tvFsMmk6ZP5vhe3lxNIpx/a9wp4jX/p3
        Qjk9GIwK+jyXKZJqdVe9+CX+Z4Gd5rCjT5E/RfqfMd7eT6le3F1O/mXUzbi/of8ACv0iEYwSjE/KpzlU
        k5yd2yqOBk/drTQga5jx0paANXG3jpT0ACSnI/io0AXG3ijQAoAiY/Mcn5aAHJhjwSg7Y70aAOLlZCCu
        32o0AHAlcbv9X/EPWjQBLqAwEMTkHt7UaAQMAD8v3aAJoiNg5FADXkaJs9VPpRYB6yOQFiO1e+e9FgEk
        Bx8vB7n1osAxTHtHy/pQBIhUrx0oAZK3O8HJWgByHY2QSx67aLATeezDJUIPUUWAFOWyCW9zRYBJBhzQ
        BG/agCVSCBt+960WAUbu55oM3uNEhjfjnPpQIs7SqKxPB7UAPLBvmHANADfMx0P60BYlRsqDmgBfMIOB
        Wb3ATd53yk42+tIBR0rRbAGVH3hkUwI52ChSnQ9qNDRbDHi+XrRoMqsNpI9KNAGkkfP3XijQBGGGX35o
        AddcmP6UARxECMZOOvX60ASUAFACbh60AQS/fNFgFSR1AG0MtAEysCoONvtQAm8eooAdQAUAR87m2AMf
        4s9vpQA6MqFGDx70AOHPTmgAoAKAI2O5iO1AEJbZKV9KNABjk5o0AerkKBRoBLGzuyAHjmjQBQNnykjI
        o0AXPGe1GgDQ+HwOhoAcx8o7QcgelGgCFgw4+960Gb3HpkHk80CHN97JOV9KAE8wZwvSiwC7zRY0WwZJ
        5osMTfjjP6UEFiMEdetZvcT3JTyy0hE6KHkbL7aAAxCHlvmH8NAEkTLKCsg5Hc0ARcGQ46UAS0AFACKS
        zbV49aDN7iurBvlOFoJHoWIAc5Ws2aLYUBQxxwKRQ5kDHPHNACbccYoAKAJYGXdtf5V9RQA+cRljHGxZ
        G5yaAI0ZCvIyelAEjFTGoUYNADcGSVVY/d70AQsxViD930oAFl5bC7V9aAIiQx4O73oAUj5KAGgHHynB
        71otgGO+GO3pTAjzlmNACAHy6AGhti570ANZi53HoaABpfLUbRwaDRbDV6UDGOfmNACUAKh60AJQA9Zf
        KUY5zQZvcXfigRIpJUEn5fSgB33v9XwO9ADkaPPSgCRlEjHHAHSgCJg7HIPFAB8o+8Mt3NAC5GGxwMUA
        MThaAGS9RQaLYCyZ5GTQMjfG44GBWiehm9xy/dFO4hrMQxABP0rNgKhyeePrSAe3JoAen3BQAP2oAlXo
        BkfSgA59RQAxlYsfnI+lACKCC2Tk+poAQMVGMUASKSVB6UAOGT3oAASehFABye9AB83rQBGwO7nlaAHr
        gjjgelAD16c0AOQby3PSgzYgbIyaCRfMA4H3vWgBASXy3WgBzPhiKAEY5CmgBy8s2KDRbDVVupBK0FCE
        rnjgehoAlDq0YUfeXvQBHuL8t1rN7gODqNqMMq3NICR3V2JXhe2a0WwET/fNMBR1WgzZI5G7rQSJQAm/
        HSgB/m/KtZvcB5lJNICNmBJLcjtQaLYROCcn8aChByBQAjjINACf8sxWi2AYoOOfu+lMBxcMu0cCgCIw
        tnhsCgBMFeCwoAaxXPIyfXFADWAc4HAXoKADLtyDgfWgBrgkep9qAIw5AxQABw7bejepoAccg7Sc470A
        IQF4rRPQ0WwxioJLDK07jGkr/CMLWb3AAydxk0gJFIA44HpQA1gSScHHrQApbKKp4FAEvlAA80ARxLtB
        FAE1tGkhk3DkIaAKzYzxwMUAJQBe03WJdM8xAiT28oAmtpc7JAOnTkMOoYcg9Kxq0o1VZnTQrzw81ODP
        qb4RftWvDobeHvGEdz4p8PmI27TD5tTtIyMEOBgzpj+Nfnx1Br4HMMjkqjrYf3Xv5P8AyP0vL8+pYmKp
        19/62PcoPD+nePPA+nw/DbxPZ3Gj215bTi1tmCMscbgtG+0BhhRjaw5PWvl3UdKpfFQ111PoHTVanejK
        67I6jwgPF0fj7XodYe4l8NzgX9p9oVD5RbKta/RcBh9a5K3sXRUaT9/+tTppKo6nvrQ4jx94vsdB1vxu
        t14L8Papb+HrO2vXleACWTzm2hDxjI6124ek6ipr2jXNdb9jmxE6dJ1JezT5bdO5a0PxDp9z4mGlaf4b
        8OaFeLp8d9FdTWy7Ji7lfLQgffXjI96JwcY80pykrtaCp1acpWVNXsmcppPir4h/EmKWK4ub/wAOhYkk
        gextVEKypI0U8Tqww6kbX2nnB4Nb1Y4PD2lFc3qRCWJxGjTj6E1/4Y0bwDaf2x458Q2dsGu49Slt+iG8
        jQxiS3BzJtdfvRjPNYupWxL/AHEb9vJdn6G3soUV++Z4v8U/2jk/sltE8NWz+FPD5UoIoAIr+5QnJCqP
        +PdD6n5z7V9Jl+SzqS9piNZd+h83mWfU6EHSobdv8z5o1fWZtXkjDKkFtCNsFtEMRxL6Adye5PJPWvva
        NCFCNon5tXxFTES5pspJJtOK6DmJVcF85FADyGJyp4PvQAqTyW7qwLo6nKupwQfWk1fRjTtqj2D4LfHv
        XPhvrX2vTbqKKS4YfbLC5bFnf+5/55S/7Y4PevmcyyinioWttt5H1+VZ5PCyUaj0Ps/SPiF8OP2mNFfQ
        9SQ6XrgXLadeMIbuBv70T9HGe6nmvzythsZlkrx1j5bfM/RqdbCZlFSe/mXLzwb8RvAt9G3hfV7fVNDW
        FIRpVxEA0RXq4J67uc1MMRga8bV4NS7jlRxdCV6crx7DLn406ro32i08X+B7yR4doSWyg86O45+ZlU5w
        B1pxwEJ64er8hPFyWlemY0Xxr+HmpMrx+C52nkLFBJpagkKcMWJHy464PatfqGK6VfxMljMO96T+4fF8
        e4hCD4b8A37h2KQlbcQh2H8JwMqfTNT/AGe73xFa3zuUsb/z5o/gR6hffEnxzshUJ4JtJIsXRlUSSxyc
        4EbdWB457c1Dhg6ElL42vxByxNfo4eZnpoHgb4FWj61rWol9Sl+9f6i3nXc7HtFEMkn0wKc8Vi8xn7Ol
        pFdO3qzeOHo4P97UleTPA/jd8f8AUPFUM2miKbRNDbk6WJMXl6O32hh/q4z/AM8xye9fUZRkcaT9pLVv
        r/kfKZxnnI/Z7vov8z581HVJ9XvDPOR0CRoi7UjQdFUDoB6V97SpRox5YH5tWrTrzdSo7tlPD7B83y9h
        mtTEapUD5uR2oAa0gU4YEn1oANwbkcCgAoAjuPuigBolX7hBOParT0AY2Cx29Kq4Do5xGDt+961m9wJI
        5TIoLEbjSAcVK/MTwentQBGQZGIc/N3oAjnzEAp5UVaegCb1ABQYLVVwDJj4PNF0A4y4Vc8UXQEjb5xt
        zgCi4CYIjGetFwIiAep2ehHei4CD7/IC+wouBIJfLc470XAXDeYSDxRcCeOQqcE5NF0A8tuJORRdAM2Z
        ZiSNpouA0OE4XpSuAhYN95tnoR3ouBIsmBzhfYU7gL5nvSuBIjFxg/douAv7teAP0p3ACGPK8LRcB0ch
        Q4J5rN7mb3HlQ8m496QiXhRjNAAnVqAIz1oNFsRyDpQMQxhzt7NyaAIJMbz7cUAMxv8AwrRPQBskv3Pb
        NO6AqgeaRnsaVwJHl+andAJ5jelF0Amc80XAKLgL5hHGMD+9RcADb+Mkj1NF0A9QEXDcjtRcBcjp/FRc
        BSWj68lqLgDJuTH93mi6Ai37+DxRdASRoyggHAougHxn5Bk5NFwEJAduaLgOj+6KLgNcKxOCA31rN7gR
        MpDEdT7UgE3FeMGgCxEd0YNACbYy7ZHNAAi7VH9z0oAR/mY+Xx61aegD1xtGBgVVwFYjbRcBqfdouAuV
        9qLgSDOACAo/vd6VwDPo2fc07oBefUUXQBz6ii6AnjbJ29BWb3M2SqAr4zSEPYliRg4XpQA0SSTfL0C+
        tAEqbioyeaAADaxagBzhyu8HrQA1SzDJPNAD4/ve9Bm9wn5YGgVh0chGeKze5othqOWbB4pDJwoXhvmH
        agBPMK8E0AKDu5oAKADKY+b5fcd6AAyYPA2+woAPnbkHigBN5HB5NAC7s80ARtncSeVoAGKlPl4NADDI
        yqoPJoARyWbNaLYBpcrTAaTuOaAGkP2OB9aAGSZxycmgBi9KAHMN6YJxtoNFsQls80DGHJPBoAUEADJG
        aAEY4PUD60AKhJO00APYbWIoM2PT7goELQA7zvlVPSgB3/LWgBwO5mXcRQA5F2qADmgB3zetAEUoORQA
        GPJzQBG2AxGaDRbAlu0mXBwO1AyIktHITyc81a2M2BGelVoIfG3lqT0zWbAFlRxuYcmkAuQenSgAL44o
        AkTlQaAAcMX7rQA4jB/WgBpZwcKeKAJELFRk80ALz6igBrdaAG4J+7we9ACE7OV6NQBIo2qBkUAI3WgB
        gfD4oAkVstk0APOSeDQAqnigzYk33VoJFT7goAXIoAWgdgoEIMFuTsHYjvQaLYmSZoiSRx6CgojLxy/O
        wwT60AIQB06UAIDnpzWb3AVgcKMc0gFm+6BVrYBKoAoM2FArBgjlvu0CJFIwMcCgdgX72aze4hzAk/Lw
        e9IB4KmMbeCOtBothpiWRcKMK3NBQRusSDdyF+bj2oATzFkZnHAbnFAEJ61a2AUgBN2aoCLJbmgBMljt
        NADGhAY80APVSFABoAYdvmHIyfpQAMiscjgUAMGA+C2z0x3oAJc7zkY9qAIH+8aAHpjbQA2TqKtWsaLY
        SQZITs3JqtBisybeRyOKze4DFK5+UYPrSAe0ZJy3WgB4VQgAkJP93tQBG4xjep9hQBIAQOetADk+9QBI
        JdrM393gUAV8/O5AD56g9qAIwMDg59zQAdWH1oAGeRJxJG5QIc5U4OfY0mr6MadtjpND+Ieq6HfJdiWU
        XqdL60ma3ufxkX73/Aga8+vgaVdWaPWwuaYnC6Qloe0+Ff20PGekBI59ch1O3HHl65Yb3H/bWEgn8Vr5
        utw5h56xjZ+Tt+Z9RR4omvjR2v8Aw3HbTRyLqHh3QLpnAEpimuR5uOm4NAc/ia8r/Viqvgk7fL/M9ePE
        uFkvftf0f+RWu/23rXykWz8O6BblCTGZpblvLJ6kBYB/OqjwvVfxTfyt/mTPibDRs4pP5P8AyOC8V/th
        +LdYaWNNbjsLc8CPQ7Hy2I/66zFiPwWvVocOUoWctfXU8yvxTOWlNfoeNa18RNR1e8kuleQXUn3ry5ma
        e5P/AG0b7v8AwECvpMPl9HDr3T5bFZricTu7I5h5GllZnYvIxyWY5JNd9ktEeQ23qxtAgoAAUDcjmgCy
        rqi7iMjsPSgBQ7yff6UAJsVHyvSgDa0zxJdWSRI+26gjO5I5Scxn1RwQyfga5a2GpVviR3YfG1sM7wZ7
        b4E/a18X+FUht4dfe6tUGDZ6/EblB7LMuHA+oNfM4nIKNZt217rR/wCR9bhuJZwsqh7bof7csMsS/wBr
        eHbbIGGk07V4sH3CSlT+FfO1OGq0buEvwd/wPoocR4aatK332/Mvv+2j4GYNu0a9ViclVe1OT9Q9cb4f
        x3SX4M7VneXtX0/8CX+Zm6j+2lo5ic6ZoDytjObrVbaBfyVyT+VbU+HMS/jn+DMqnEGFgvdt8mjy/wAU
        ftb+I9ZZoYdQsfD9seqaPAbm5I9PNkwq/UA17NHhqnCzau/M8itxTHVRenkeNaz8Q5r2+ku7fz/tsmQ+
        oXkxnu2Hs7cJ/wABAr6ahl0aatK1uyPjsXnNeu37NWffqclNcvO7M7FixySTkk+pPevYSskj59Jt80nd
        sgfkYH3z90+lMsgzuJUD5/4T/OgBdoXgUADSELigBsbZyelACIfmoACPMd/agBgLMMjg981atYCOVFcg
        52DtjvT0AUqdxG3GOwqGA1cFuPvetICyhwoBIzQA15UU4x83rQBDIxkIGMj2q1awAy7Tiq0AAcfeGR2o
        0AApk4PJFGgAshy1GgCLMrDa27P0paAAwH46e9PQBzcsaNAEyY+f71GgBt2nFLQCSLoaNAJoFQqCMBu5
        PejQBzhd5CDinoA3Kdxk/SjQCNmjLHj9KNAHxNEAdwyD0o0AF6UaAPWRojwDzRoA5nIPFLQAyTzmjQBA
        cMah7mb3Jkx8xYZHakIdBgqRIQcfdoAVfMYZz+tAC8jqeaDRbBuzx2oGQz/u+nIPpQBAy7UxQBE0u1cZ
        Aq1awEZO5M1WgDQDijQBdu/j0o0AFbMiGjQBT9z86NAGL0oAXtntRoAUaALvK8YpaAGSwyRgf3qegCbX
        P3WJHvRoBIm4KNxyKNAHtGvkuxGQego0AhPXltzf3aNAEIfrwo9M0tAHRhgW48w989qdgCIg/KWKgdD6
        0WAmaJM/Moz7Vm9wIXUwtuQgBu1IBvmt90/nQBLEGwcGgAUYGc5NAApkd+MgUASKpR8GrVrAOYjdjPNV
        oBEfvk9vWloAMdhyOd1PQB6qMYfkD7tGgDgS3Xk0aAGUH3hz9KNADIPTpRoAUtALDfdWswLAaPYvHzet
        ACyO4AweBQAbj5mWPNAEocjpWb3M2SiP92JG/wBV/EKQhf8AlkPTtQAiqJFAA+b1oAZJGbc5zkmgByNu
        G2gBclOMUAGcn3oAkUNjjgd6AGMVLHbwKAHLJtGKAF37uCaAGOrhiFOB9aACMHnPJoAcg4+ZyB6UAOUK
        pZlPHvQBEW3cmgBNw9aAEC5Zl7NzQA3nZyMY4oAiLkDGK0WwB8x5P3fSmAGTBwo4oAYxLNnuaAG0Gi2A
        c9OaBjZCMdaAITytADVzigBxjWVcZwwoASII24SjJHSgByHKg0AOoAkQ8CgBj/eNADo2QH5hzQBOCO3S
        gze5Ip+Uc0CGMfmLdSvFAD1UhR+dADHkKsRQABsqxPXFAEIj3c0Gi2BncLsHQUDEhiE7mJ2255yO9ACY
        fe+MKBxgGgCM8BedzehoAcx55AX2FAD0PyigBaAHrIVGKDN7jt27nvQIU8UAIAd/SgBT1oAKACgBDMi8
        Ec0AAYMMjpQAg/1lADj1oAaAd9ADmUg7j92gBytuGRx7UAKv3jWb3AVs7iTytIBN+Pug4rRbALyeaYDx
        /qn+tACOCW4oAbg5xWb3ATe44U8UgFw0n3uooATdt5BJJ7UAWIYUaFyTsfO3AoARxJtzkYHG7vxxQAxc
        lcklvc0ALsdRv3DaegzQAeY3pQAg4ct3NADmk8wfSgBqtvGT1oAkwxRcHigCVCSdpoASSFi5weKAFUNE
        BnkHtQA1gAx2jAoAif75oAjbOaAA/cFADVzitFsAvzetMBOfUUAL83rQAnPqKAGt1z+tAETHJPAA/vCg
        tbDeB0bd7mgojbljQAkfEjZ4oAY7kMaAHR5JzigAkBLnFAABwEPG7k0AKDnkEsemO1AD1k2ttxtf0oAk
        diRycmgBi9KAJUZAoyOaAGuQWOOlAEL/AHjQAlABvKjGMA/xCgBrR+WcKdw9aAGD71ACTEHOPvetAEG8
        pxJz6UAH3fnk5J6UARkszEtyPSgBAFl4UYK0AG7d1+/3NACZMfU8nrQAYxwOaAFfotAE6MMDkUANYOWJ
        DDb25oAMjcvNACxPg4oAsAlhmgB6yoowwyaAF80HoOKADO7mgA2EjKOVkPQ+1ABuVuVzj39aAGNnNABh
        qAInkKsRQABtwzQAUFp6EbxMzEjpQO42NSrsD1oC5KvAoHcY2Nx5yf7p6UBcicYO4gKT2FAriLMVyeUz
        3A60DuKmfmyNvtQFySExNBMrD97/AAGgLkCSYbLZb/ZxxQK5bRg6gqu0HtQO5FN0NAXIlBA5+76UCuHm
        Y4j+XHXNAXDcG5HSgdxQH3pg8UCuJgjOeuaB3F24G4UBcP8AW9eMetAXELZaN+pXigLgjFZGCMc9SD0o
        M3uSgiYcgJjtQIes3lKG7tQA8uQgYc7vSgCJRtJGaAGrkNz930oAVwzOCn3e1AEzCQAAn9aAGLIVGOpo
        AeDu+tAAvVqAHQycGLoG6mgCSNk2jI5oAcQx5XhaADkdTzQBIkZZQScr6UAJJtAwvSgCtJyKAKrIu4nb
        vJ657UAIu1SwByPegBOCn3yPYUAIOB3P1oAYy7SW9aC1sJl35FBVx6lQMMMt3oC41pArZx+7/iHrQK45
        ScDPBPSgdxcj1oC4Bj9wdG5oM2Lu343Ex9h70CJFDY+5k9we1ACApG+S7MGoAkdIyP3f60AQFCD5Z53c
        mgCTz9kYA+8eKpOxa2IlJ3cnJp8yHoWUIwBUvUh7jJFTzAWHNIQk+ASB0oAhQEt8vB7mgBxkAkO0cUAW
        EbKjPBoAJOgoAa5UEuRkrxQAknCL/d64oAfGQVG3pQA1h5jH0WgB8TBgeMNQA1QytlzxQBIcHkfdoAb8
        3ZuPrQBZ81F4IyaAJFYMARwKAJohn5P73NADY4vOY/7NADmkcv5Y+VW71m9zNgZPlBZyUHD+9IQ6OVgg
        ySV7UAO81j93he1ACgsRknmgBPNAOB971oAkSQ7Rnk0AOxkbiAAf4u9ACebk8Et7mgBFOXzQA5/vmgAT
        AJ3cg9KAGgEDnrQAgkw5HpQA9hzv9aAE3buaAI2bcxX0oANpXgGgBFdwWAPFADGaRlzmgBYt2wZNaLYB
        rylWIpgAbdzQBG0mJlFAEROST70Gi2HRgk/JwR96gYkrR7zxQBE2Sx28LQANjZj+P1oAiwR97k0APXO0
        UALtB6sR9KAH9FXnPvQA9l2/NQA3du5oAcAq7WYZBoAsB4nfIXigze4pIJ46UCG7drFqAFabmgBT9zf6
        0ANRkZQSOaAGuQWOOlBotiJm3MVoGNK4GY+HTqaAGMCD+tADl6UANbOaAHL0oAlRXKjB4oAACHOetBm9
        ybCKNxHJoEAZW5I4PSgBDIU4PWgBjHc2aAHp9wUAL5hU88r6UARs8bHOKAJAQYxjpQAifcFACmQrxQA9
        CWUGgB3zetAER/1tAEqd6ze4CDOKQC81otgDmmAc0ACybSwzQAkbZDSf3eKze4EsERZSWACHnPekBG7h
        BtUkqOhNACKSy5oAa0m1gKAJnUzbQvBoAfNbywIrs2QaAIWfyjgDeD1B7UANWX5uCT7mgBzTJnkZNACe
        aD04FAD1OVBoAmi6GgAETMMg8UAG4x/KeooAPNoAFV5XIBwKAHMhjO08kUAV5M7zQAq9KAIZpNuRWi2A
        IiWQGmASdKACLOwUAEnSgBgwIg2Sf9mgBn1G32FBotgbYsYYjmgZFkucpxmgCNg4Yhjlu9ADl6UALtc9
        DxQAxmkUkZoAQIzjc3INADiPlUJxQBIxUHDjMnc0ANoAekqooBHNADtwbkdKACgCN/vGgBKAFEe7mgA+
        6Mgkn0NADJySFyNvsKAInj3LmgCJhtXFACf8sxQBERuzk7MdCO9AARIeRhR6CgA+Y/KwA/2qAEzGOuWP
        qaAHIQc46UAB/wBXQA0MgHI5oAcgB3Y6UANoAfHJg4oAm82gBQ24ZoAkXO0UASKuVGTs9CO9AC+YRxjA
        9AaABjuCmgBsmdxoAYZzGdvrQAkkOBQBXLbDigBPMoNEtA8ygLEZmBc4+9QFhWkbPPWgYpOUzQKwnCxj
        dyO1AWEi8zB5oGAcqMHrQAZzzQKwecc7PSgLCs7qoAPFAxnnEqqntQBIy7fmoFYh3o0hJHNAWJfNjHG2
        gYm4NyOBQKw4/wCroCw0PgYoGLv38UCsKF2yIKAsN9frQQwoEFAFiMlIwx+63agBwiBf5eBQBFcgKxA+
        960AMiYoATyaAHySmTD/AN3igBzKEOB97rQAwOVcg9aAJg24ZoAXGSE/v80ANEuHPtxQBMCWGaADmgB6
        yHBBOzb0I70AOAMw5GPagBkieX8vpQBE0e5M0AV5IuKAI1TYuaAHFt0eaAI2+5QaJaDVztFAxefagBGX
        zMA/w0CsSo6F0MgzxxQMjJUE5HNADlDFQVOF7UGb3Anaw8znPSgRYdZMDJyvagBscqLuBHNADFYMWI6U
        ANoAv6dpiXrBpJjEFBIAGc1k3qWloU7hFSQlDlc4HGKm7HYa0xJwQB7itVsQ9xrS/dAO73NUIft38+tA
        CEbTigAyTxjHvQAnGeCW9zQBIkvGz0oAmThRQBBL980AMWXyifegCxD/AKsUAPoAil4wc5/2aAFcuw24
        Cj0FACIhVQD1oA//2Q==
</value>
  </data>
  <metadata name="menuStrip1.TrayLocation" type="System.Drawing.Point, System.Drawing, Version=4.0.0.0, Culture=neutral, PublicKeyToken=b03f5f7f11d50a3a">
    <value>391, 17</value>
  </metadata>
  <data name="menuStrip1.BackgroundImage" type="System.Drawing.Bitmap, System.Drawing" mimetype="application/x-microsoft.net.object.bytearray.base64">
    <value>
        /9j/4AAQSkZJRgABAQEASABIAAD/4QAwRXhpZgAATU0AKgAAAAgAAQExAAIAAAAOAAAAGgAAAAB3d3cu
        bWVpdHUuY29tAP/bAEMAAwICAwICAwMDAwQDAwQFCAUFBAQFCgcHBggMCgwMCwoLCw0OEhANDhEOCwsQ
        FhARExQVFRUMDxcYFhQYEhQVFP/bAEMBAwQEBQQFCQUFCRQNCw0UFBQUFBQUFBQUFBQUFBQUFBQUFBQU
        FBQUFBQUFBQUFBQUFBQUFBQUFBQUFBQUFBQUFP/AABEIAH8GpAMBEQACEQEDEQH/xAAfAAABBQEBAQEB
        AQAAAAAAAAAAAQIDBAUGBwgJCgv/xAC1EAACAQMDAgQDBQUEBAAAAX0BAgMABBEFEiExQQYTUWEHInEU
        MoGRoQgjQrHBFVLR8CQzYnKCCQoWFxgZGiUmJygpKjQ1Njc4OTpDREVGR0hJSlNUVVZXWFlaY2RlZmdo
        aWpzdHV2d3h5eoOEhYaHiImKkpOUlZaXmJmaoqOkpaanqKmqsrO0tba3uLm6wsPExcbHyMnK0tPU1dbX
        2Nna4eLj5OXm5+jp6vHy8/T19vf4+fr/xAAfAQADAQEBAQEBAQEBAAAAAAAAAQIDBAUGBwgJCgv/xAC1
        EQACAQIEBAMEBwUEBAABAncAAQIDEQQFITEGEkFRB2FxEyIygQgUQpGhscEJIzNS8BVictEKFiQ04SXx
        FxgZGiYnKCkqNTY3ODk6Q0RFRkdISUpTVFVWV1hZWmNkZWZnaGlqc3R1dnd4eXqCg4SFhoeIiYqSk5SV
        lpeYmZqio6Slpqeoqaqys7S1tre4ubrCw8TFxsfIycrS09TV1tfY2dri4+Tl5ufo6ery8/T19vf4+fr/
        2gAMAwEAAhEDEQA/AOCr+kD+W3uOjJQ8c564oETgBeM0APTrQBIchgSflqWA9pAJTjgUrgDHcc0XAkiY
        gFOgbnNFwHwuGUnPtRcze4wyFTyfl9KLkkisCoPQH1rN7gOyKQCFQo3MMg9KAAeYwzmgAUHec8n2oAk3
        kUAAOWzQBLQAUARs5DEUAJv28/3qAGP+6bjvQAnC8Zq09DRbEEv3zVXKEP8Aq6LgNHSi4CHvVICCmBGy
        /MSOT7UGi2ImOWzQMjYZJwDu9aAEww6nmgCNmVDkjJPcUGi2Da38B+WgYm4k7SeaADGzigBFOZMUGb3J
        ck/KeMUCFwq8YyaAD6cD0oAQsRxQA+M5OaAHsQW4+960AN5HU80AMY7Dkd6AHFSqrk5X0oAJOWJXgUAM
        56k5WgB6BiflOF7CgCSRmQbWBzQAseSgOKDN7jWB3HigQ5cbRk7PTHegBrrIWOAFHoKAHKJNo5/WgB3P
        fk0AIZfK6c5oAXLtwDxQAbSvB5oNFsFAyRQ+3g4H1oM3uRl2WQg8+9AhWOWoAfHwDQAgwO+T/dNAC+YR
        /CB9KAJFLMoOcUANYHPNADkztGKAFePcFPWgBWJQ4qGwEBJ5ougDgffGR2ouAIcFgTzRcAQ5LKaLgOiG
        3ii4D2PzUXAjdjEcn7rUXAcQqhdp/wCAmi4Ds/PyAvsKLgKx+Y0XATn3ouAAHvyvpRcBMjtwKLgKI880
        XAMKv3hkUXAN6sdq8LRcBkoaPhT17UXAhMJHXrVIAxt4pgRv96gBC5U454oAjZ0Jy3JoAbkduBQAxs7s
        nlaDRbABn7o4oGHIoNFsMb7xoGMHEyntQA/+I/WgBu4etAB975ARvflT6UAIHjLnjkcGgze49sZ4GB2o
        EJ8o4I5+lAAfZBj3oAT6jHtQAhk2nFADWbccgYNBothy7gBuORQMcxBXjpQBDQAUADYwuPvUAMkzuOet
        BothtBQbnHQ4FAAJD35NAE1vG9wQsaNI56KoyTSbS1ZPK5OyNJdAuY2U3LQ2O7nFzKqtj/dzu/SuKeNo
        Q0bO6jl+Iru0YmzD8Pru5w9vdLd7hnEFheSfqIcVy/2pQTs/zX+Z6MshxcVfT8f8iw3w/ubaIm5vUtMD
        J+0WN5GB+JhxQs0oPb9P8xRyLFSV9Px/yMlvDN9K5NoYNRjUZdbOZZG/75zu/SumGNo1OtvU4KuW4mjf
        mj9xlzLLbMI50eOQcFXUgj8K7k01dHnNOLsx6nc23s/NMxe4eZiQ0CFZtzZoAKAHh3VRg4FADgSeT1oA
        XKgcoD7mgBImZ5isSnceNqjJNJtLcaTexeXR5ZpFSR0gkbpDgvKf+2aAt+YriqY2lC+tz1aGV4mva0be
        p2Hh/wCCPinxAqta+GNau4D0kaFLVT/38bP6V41XPsLT+2v1PoKPC+JqK9mdrb/sseK5oww8I3/I6HV7
        cH/0XXnviWjummvT/gncuE59WzK179m7xfp1uzL4P1tVXktBLBdAD6KVNb0uJMLPeSOepwpXirxPO9R8
        F3Wnz+RIxtZx/wAu2owvaSH6eYAp/Bq9qnmVGaUuj+Z4lfI8XQvpcxbqyn0yXybqGS3k7LIuM+49fwr0
        4zjNXi7ngzhKm7SViswYscHirIELleD1oAepdhw34ZoAcNx+U/nQArDamKAI3D7eDgUAMViBg8mgBGlG
        4ZYj2oAsGTKDGWHrQAisWUKV2j170AG0LwDuHqaAGNnJoAQrt+agADFhmgB6yBBh+R2oANxJ5PNAC42/
        N3oAjaU7jgb/AGPagByvtUEHO6gBcBeKAJIygPI5oAccGQ46UAPV9z7f7tAC7vOkOeCKAHsSwBJytS2Z
        vcmEgA+UcUroQuQ3QfN60XAMEdetFwDnpgAevei4CLCJHxuz7mi4DpZPsQ2jn6Urmi2KUj+Y5b1ouMVP
        3o29NtWgGuAGJpgN82gCNmyxNAEm8i3YYzQAnnuQFMjIg6be9AEqySADnCelAChwwzkUAA+90wP7woAm
        WHzVOJTgetAEW2TZgNmgCNlLrhjytADEl54GG9aDN7jjI2eck0CAt3PGfWg0WwxgAxI+/QMhY5JMnOel
        AB8w6nmgBCxHFABknvQAvzetABzQAZ9xQAbd/BoAjZDG2Oq0Gi2BgAu4D8KBiRktk4oAfHnYKAHRpl2N
        AEchdXIU8UANWZi+1qAJQ+3igBc7u9BD3EIYd8UEj40LnB/hoAlWQl9n96gB5bec/hQAmHP3TxQA8uyq
        oHDD71Q2BKZFkCqowaVwFkDxbfm6+9FwJQmwZzk0XATdu5p3M3uZi/eqwe5Mn7p2cdWoEJ/GaALCTptC
        Y+Yd6AHbd/B/hqWA6PEhwTikA9gI2K5HFACByO5Yf3aAFJzzt2+1FjN7joygPzjPpQKw9sOxBP3aze4h
        0NwoJygPvSAd5pJzj5PQUASKwZcjgehoAVRjLKcHvQAgbcMjge9AC80DsJznk5HpQFg34+6CBQIa8hx0
        NA7DVOVFAWDIoEMZfMY+grRbGq2ImO5s0xjaACgBr9KpAQ0wI3JU/KNufvMKDRbEcigY25ZfWgYjYzy5
        HtQBBMdnIO7NADNu2MCg0Wwiny1z/eoGDAAAAfNQA7Kj7wy3c0AIFw24LhfUdaDN7koJYZBLe5oEJtcf
        MpoAASzZbrQArPg0AAJIzQAc0AHNABzQAEEDPagBNxb5aADZn5cj5aAHBg+1R9485oAknu2mCh+O26gB
        oZxgKxI7UGb3JYpDg55NAgHTd0JoAXdu5oAKACgCNuWNAD14UZ4oAXdu47UGi2JIPLSUbxnjigYw/fP1
        oM3uNeXIVADkd6BChmWdQeeOtAEitkZPrQAxutAD0+4KAFoAerZG2gBcbeARQAm/BxQAuSec1LAXn1pA
        B+7QAioGAwPmoAXay8E5NABhqAE5GX7pxQAAbDyvmZ6A/wANAEiR/KCWLe9ABwDjNAC8dAPmoAJGZI1B
        Bz60ALG27JoAbn92475oAa7OG+U8UAKpJHzdaAGy844AH94UABXb83b+93oAiaRycq2R6mqQACSMt1pg
        RtGzksDwPegBC7SICDhv4qAIn6LtTI9aAGyZ3HjHtQAjKQm6g0Ww0TMsYKcFqBgoYKNxBNBqthrcmgBu
        S3y4oAXbt4oAjcoGORz9KAG8HoOKAEGNxwPm9aCGShynD/N6YoJF2yffzQAZJ5brQAbd/wCFAChlIyQS
        fpQANjbxwKDRbENAwoAliXeDnjFAFeTezkg4FACb2UYPPvQAhOefWg1WwcetAwB3Hb69qNgOu8H/AA21
        TxXqwsLOxnv73AZrK3IUxqf4ppD8sS/Xn2rwsdmtHCRvJ79T6TLsjxGOktND3XS/gv4V8BadeXnjXXg7
        2SxPc6NoZMYiSQ4Uu/8ArJB6kYFfD1M2xmPly0Fprqfe4fKcJgIXrWv2PffBHgzwppOl295oGgafbW8q
        eYHSJPMZe5aQ57Drmvl69fFzqqGIm3c+mhTw8KLqUor5HM/An4v6n8T9W1QTahZxWUN1cW8Omyp5N0Y0
        fCSxY4kQjg+nWuzMsB9WglG7dr3OPL8a69Rq9l2H/ET49av4P+J+o6BYxw32m6Xopv7qKSFm3TtnajSD
        O0ADPT610YPLIYnDwqSbi2+5z4zMnSqyhyppeR1baZ4I8afC/SPFnjXQ9EeO7s47ia5hg/1bv0VHX5s5
        wBz1rz/aYihXlRpTeh3KGGqYdV5x3PIdT/Z/8MfEuG4PgDxAz3sKl5PDniRGLIB2WXAli9idwr6SjmuK
        y/lWIj7r+0j56vlGDzG7p7nz14z+Fur+EtXk0y6sLrT9TQFzpl5gyOo6vDIPlmX/AHeR3FfcYPNqOKSa
        d13/AM+x+fZhkVfCtzgrpHEjOcZOR617p8qPUptwR8/rQA7bgbqAAkFMuMg9KAFj4QZPNAF+z0qW/MK4
        cJM/lQpGheWd/wC5Gg5Y/oK4sTi6WFjzTZ6eCy+tjpctNaHv/wAPf2aZP9Dl8WXy+HYLo7YNJt51F5cN
        jO2SY/dJH8CV+eY/iCpVj/ssObz6L5H6jl/D9DC61t/P9Dc0X4u+EfBGo21j4W8FxafZLeGyu76/xFKH
        DhSVJyzHqTn2rhll2IxUeavWd7X029D1o5hSoT5KVNW2u9zP+NXxk8b/AA/8ez29rqlzNo8TKGgSNcRg
        sCA0gzyyngHmt8ty/CYqi5Th7yv1OXG4/GUqyjGXuvoaPxk8ReKLi9mufDVzr1sJNQtrdv7OibylE0S7
        ohn/AJaDd1HGcVhl9DBU4WrJaJl4uvinyuC6o6D4gfFbxJ4R8UBU15tNs9PjsrCKyWMNPczTRglpUP8A
        EGwCRwoNc+GwWGqR5lB63ZdfE1YTjTubnxK+PGm+FLzRfDPjnQtN8SXMlh9o1tVCt9kcjcFQEcjHGc9R
        SwOXVq7nWwsnFdDfFYyhQ5addXZlaz+zN4d+InhLT/EPgK5bQ11OMzW+g65lrWcddqg/PEfQrmt6Gc4n
        CTdOrrbqjHFZVhcdBOyVz5c8bfDPVvB+uXGnXOnXGmapEpkbS7k7mZB1eCTpMn05HcV+iYLM6WJgnzXv
        1X69j8wzLJKuEm+RNo4VmMuGwa9w+X2JB90cAD+9QAbwOBIx/CgA3ntk+9ADGDFiTyvpQA9eV+XgUANY
        qD8wyfXFAAjsG+The1AD2dieck0AJhzyKAFw3egCNlk3Hn5fSgBC5U4xQAeYfSgB0bAngYb1oAkYMDz1
        oATkZbqV7UAG0j+dABzQA4yFVUelAC5DPksRQA5pfLOByD/EOtADkGVwp3Ofut6UASoRtGKlmb3JFkwM
        ZpWESrNhR/jRYBfM/wA5osAPwqv60APkcPEOAD/eoAqsMLyd3uaLGi2IaLDBJMEiqQEROTk8UwCgBjcE
        84oAcJSsYbqV4oAFlwBQA4tlKAFiKcIR97k0APaUbuOnSgB6ynAoAcr7SW/vUAMcbV9qAI0zuOT8vpQZ
        sc0oz8p+WgQCVW4I3kevb6UGi2I3k/iA+Vv4u9AyNkIJwSw9TQA1uQO9ADjnNADfMVeCpJoAXO7kcCgA
        5oAY7KhJIJNADlbzFDDgHsaAF5oNFsMfrzQMRZCpIoAaGDdWIPoKAJUPyjBz9aAGt940AJQA0f6ygBSS
        khNBD3JA+8bnBIPSgkkjkKAg9aABWDDj71AC72Xg8mgB6ybVDd6AFZ96hqlgS54GQAP73elYBRgdDn3N
        FgEL7eKLASxzHaKDN7lVEDQrj73rVmgiAocE80ATAg96hsBTjoB81K4Eibtozgmi4Ei7FGSPmouBHvR5
        CNpxTuZvcerhXIXoKLiHO27BouAM2w5Hei4CbdpxWb3AlQoFGRz9KQEiyYUbRxQA5SWLGgBFHGMc0APJ
        +VaAGySbW9qAE83jgYb1oAPNbvyaADzT6UAKDu5oAil9e1ACvJhcVonoBEDl0NO4DfX60XAYx56ii6AT
        n1FF0AyQ9s9PnougIm5XPc81SNFsR73UMAcCmMhUsRyeaDRbBk+ooGMklKgt1KelADFORn15oAXIoAMi
        gCRfujmghhkpyOd1BIuCvGaADmgAk+4tACDp1oAl/wCWQoAj5PQ0AJh+xoAXa33W+61ABkN93gUAGV7j
        JoAOvTpQAqRCQtntQARHHz/3OKAJlwG60APYjPWobAhcOXyDxSuBNzvTJycVaAT+CmAi4xx96gBen3+a
        AD5f4RgelQ2AUrgIv3qtAObrTAaXK8UALnPJ70APU7gEqGwHAY4zmlcAouAUXAKdzN7gcHgD5qLiDBH3
        utFwHq5AxSuAoJPOad0AZ9xRdAIJCrkUXQDmJY5ougGmQqjj3ouA7lsH2ougBpCFx1ouAxBzv9aLgTed
        kcfeouApLbcs27P8NFwCNhzwF9qLgMcgrx971ouA1A20ZOTRdALz7UXQBz7UXLWwE/L1pXKIqLgDEbet
        FwIk5JXs3OatbARHJJpgGQx2liKAFkXEagHI9aAI5CYxkn5W7UANBGNoGFoAa67RtFBothiyFVxQMXzT
        QAfO3INAEbZ3HJyaAE3bORzuoAAMcDmgCVMhRQAgA3/eI9qAHN3Ocj1oAG4WgBquVUCgBd2eSetADHKB
        jkc0AMCKz5HAoNFsPdWx8rDH1oKIMHv1oAcf9XQBCcjLnovQUAKFJICAtk4AHU0bBueu/Bj4Nal451aT
        y5DZWdqcX2phd32c9fJhB4aYjqeiZ9a+MznOIYePso7vZd/+AfeZJksqslWq6Hu2k+ONM+Heo6Vo+jaG
        dM8HzTNbvdyJmS5uupLsTkSdeH+929K+Llg6uLhKrVnzVEr26LyR9zSxUcNP2VONobNnXeMfhzf61490
        TxHpFkuo215ps2k6hbyKI/LiZd8U7s3JCtgbCO9cODxsVRlRqaNNP/NG+Mwsp14uGzVtfzE8Dz+H/hn4
        QPgm98SHxfNEGjWy0CwZ5I0ckujeXkcsTySOK2rUqmOq+2pw5Eu5FGrSwUHRb5h+m65o/hnVJNQ0v4Z3
        cNybg3MU2p31pavA5QI3lK75QFQARVTo1q8LVKl/RM5vbww8rxivvRPeeJNO8QHX3v8A4far5uuWi2V7
        PpOoWt3IYlyAFVXyDyeQM0fVatOKUanw900X9cozm70739Dqf+FgeG7/AMLHw74du4NF8QW9sIdN0zxB
        E9kBIq7VDBh8wHU4zzXJClUhV9pUTlHrbU7XVpTp8kWoml8MvhBL4K1Jdf1vUjrWvSWSx3F7ls7zzJtU
        fLs6YGM8VOLxssQvZw0iugYXCKjepUdzj/iJ4x0jxVfw+GviBoFkdEup/Lsrmxu/MvLOfdiOXjDRk5GC
        OnOeK7cNQq0KP1jDStLrfZo5q2Kp1Kvsqkfd6Pr8z5r+OnwI1j4f+IFt7gi7N2T/AGdqqKETUgBnypAO
        EuQPwkA454r7nJ84hXhydt/L/gHwWeZI6bdakt+3U8QwyEqQQQcEEYINfaHwDVnZj1kKjFAhc55ySf7t
        Bm9zX8O+H7rX7+1t7eze9uLiXybWyi4a4k9M/wAKDqzdhXm43GQwtNtuzPayzLp46olb3T6k8L+H9C+B
        Nvb32oRp4h8Us8cWoz2gH/EuhYZKxKfuIB/wJuTX5Zia+Izab9lpBbeZ+x4alh8qhGNry69kYHiDwLr3
        iX4gaDrumak3ivS77Uke21NYDJbWsJPyCJc8tH/EeMdCe1ddPEUaFCpSqQ5Wlt1OepRnXre1TconXeI/
        A3gYeM9U89L3xvrs03nS6Xo0QzG+zaxllyEhBOX6ggn2rkpYrEuiopcsfN/puzSeFoRlz/F+Qt98T08M
        2j6fNfeDfCMGFD2RD61esVGFMm0BSwHck10Ucvr12nCEpP7l/mcdbNKNLSc4ry3ZmP8AtJw7lWT4l6g5
        DbgY/DKBAexALZ+ldiyKslrhl/4Eea+IaCdva/gT2/xe07xLJL53ifwf4hmuF8qSLxLoz2E0qf3fOXcB
        9ayrZZiKK96lKP8Ahd/wO2hm1Cu7xmpPzVil458C+FvG97cX3iSPUfAM+reRFdanbyrqOk3UMeAqLMv+
        r4AwWxU4fEYvD0/ZUGpJdHpJHTUoUMTUVSb5ZPtqmX/HGg6zB480aW106+L3dzHp2g3kN/tsbe2SL926
        ygkB3ILNgcgYrChOnOnNzavu9NfuLrU5RnGNKLXmd14r8Y/D7xvcaT8MfHWqRaj4i2KkWuWi+UIL70ic
        co3v0OOfSuXDUsZhubG4WPLHt3R21MRhq/Lh60ry/U+WfjP8HNa+HfiS502/jWW+KtPa3kCbY9UgHV1X
        +GZf40HXqK++ynNaeKp76fin/kfnWeZLLDSdWmvU8gT/AFQr6s+HJIs7BQA1pCGIoATzGP3eCOtAEitu
        UEcfWgBjZDZJ+WgA4PTpQA0tID8vSgBfNYdetAD1IZQS5HsKAEkDkcfd/vd6AI0BDcksfU0APzhm5oAa
        rCMZbkHpQAolY9etAD1m+Udm9aAEYSE5zQAm2TOM80APXAUbxk0EMM+hwKCQj/1jUASJL5YOO9AEiEBR
        UNgAkw+O1K4E4ZCMkc0XAkUjHGAKLgSJtYYcg+gouAFfL+UkGi4DGQE5ouAx0QDnrRcBv2ePygy4DGi4
        FeUEEA8mi4AIWkZucAetWtgImK7cMMt3pgJkeWMcCg0Ww0sCqqy4H96gY8qAcIdw7UGb3GlX7UCH7yqq
        D1FADxN8zUAOQnaCxwD2oAcWycfwfwj0oAZhVZhIcMO696hsBCQU4G32pXAiOB98ZHarQD0B2jPJpgOJ
        LKFXjHWgCIrt6cL70ARvIQx70AORiyg5oAd83rQAfN60AGT6ig0WwZPqKBkbyFWIoAaxLYJOV9KAHHGe
        OBQaLYbvSN8kcnrQUKQBJ8vSgAflX/CgA83HAoM3uG4N0+9QSIpO/k5NADmcg+1ADlZdo3Dmgh7i/Kfu
        jBoJHx5B+brQA9hvY89KAJIWQgq38fWob1AZkMwx0pXAlb/Wmi4CN1ouA4SFRii4FWN8KBitAHZzzQBI
        nK/dAH94dalgPjcqcbtyUrAOJLSEqcL6UWAlG7HPJosAFyOKLGbJFdNoRAd7/fNAgJGeOlACdWGOfpQA
        +X5MOvO70rN7gPDZG3pSAN2zgGgB0cvNAEjSkkgcufun0oAQMG+vegCUNGI/nGfSgCLduO2gBdu3igAo
        ATcPWgBpIGSfuD73vQBXHua0WwC78U9AGOSTnp9aAI5OnNADE+7QAxxglv1oAjkl44BDeuKpGi2IcsRk
        nmmMac/N9KDRbEY/1YoGMXgmgBBwOaACgAoAerZAXtQQyVRtGMigkVugoAcc5oAbg9TytAC5T0NACY7/
        AMHpQAvX7vAoAOaAEyWO30oAAu1iKAHNkEv3XpQAmCKAFXq1ADAG7GgB2GHWgB69KlgSKpELN1GelKwD
        iwfBHTFUgCmAUAHHbhqAI2WTcef1qGgEwR160WAkT7oqkAeYRxTAGJIBNADiPMJH92gBNxAyPvt90+lS
        wJFAVRjilYBzfcosA1XKqBSsgF3Z5NMze49SNuB96gQ05zzyaABnIXGDQA1Tkc8UABIPT71AEigqoYnm
        gBQxbmgBH6LmgBzybQF7+lADVbIznFAC59xQAf8AAhQAZ9xQAZXvyaADduJUDgUASxLsUjt60ARnOTzQ
        BG3WixothKLDHRlQfm5FFgGzorsSg4NKyAhUbRirQC0wGj7zUARo7K/P3fSgBJ2VgCR8p+7QAz5h1PNA
        DOSsoH+sONp9KDRbETNk49KBkiLhcCgCNzsbI53UARupDYU4PegB275V2qCKAF3BHyAAzelAEvmFfkJ6
        UALjj2oAQEZyfuD7w9aAD7v3xkdqADJPymgBjJuYr/doAbnPNADjt2DIyfpQaLYgOM8dKChGkIwBQA4n
        cc0ARtnPWgDvPhP4BvfG3iSzsrRhBPdbn+1OPks7dP8AW3DfTO1f9o+1fP5tmEMHTtLr+fY+oyTLXi6q
        nJaL+rn0xY/GXwn8N/s2j6VZP/wi2ln7HcyRL+/tXz/x8yD/AJaRvnduHJyTX5y8uxOLjKpOX7x6p9LP
        p6o/TljqWFapUlotGdt4s8H+GNMivdd1aeNvCOqwR+fosUJZ7y8zuglttvzecc9uvB4xXBSrV3bDwX7y
        PXovU6qlKhpVb0fQ8u+M/wAeIdGePTvERuZr+Tatv4G0e4O7/Z+33CfMznjMKfia9/A5Y6qdW9odZvr/
        AIV+p83mGaU6Uvq8U5z/AJV+rM/wv8Ivjh8YI4IL3UbH4TeHp1MkGj2iC3mePufJT5z1HLtWs8zyzAP9
        xTdSXeWpzQy7NMd/vFTkj2RrH9jT4UaV4v0vwv4p+KGp6p4s1Pd9n05bhEllwMsdoDED3JrnnxNj5Lmh
        FKPodlPhrAJ8s5Ny9Trr/wD4JyeDohv0TxZ4k0a5H3ZVuFkAP0wP51yx4mxid5pSXaxvPhrCNfu24vuc
        X4t+Cfxy+EVjK9lf2nxd8KRDdJpWpw+bOEH91XO4H3Rs16NLM8DmEkq8fYz6OOi+ZwvK8wwDvhZe0XZm
        j8C/2ihqJew8PNdyXEW4XngPWpi1zGB9/wCwTv8AMSOf3MnPHBqMwyxRj7ZtSj0nHb/t5fqdWBzXnm6M
        9JdYv9D2HwV4U+Fmj+Eh42s7l7nT7eaa9vrzVj59w0xIys4dS4dDgBRjHTmvm6tbHSmsMnp5bfI+hhSo
        Je1Rz918WbP43te6Pr/ho2vw11ONre01mR/9Iiu1dRG5UcxMWZSnfI5r0HgqmXqNanP94tWvI41jFi5u
        i4+69L+Z8mfGH4d6h4I8S6lZagn/ABMtPkVLuRVwt1E/+pu19nAIYdnU+tfo2U46OIppJ3T28u6Z+X59
        ln1Sp7SK0e/kzzhfvGvoz5It2kC3M+2R/LhVTJLJ/cQdT/Qe5FY1qipQcma0aLr1VBH1B8PNAh+C/wAO
        5PG+paeZvEmqQbLKyfg2lttLqg/2mA3v3PSvynH1Z5tjJUIztFb+p+04GlSynCKpy77f8Eg8MW2j/Hrx
        Raa7pF+NE8WWdtv1uzmR4rPUrRgMyIf4doz8x5GK0q+1yqmqUoNxl8L6phSlDMZXpy1jrLs0b/iTxz4e
        8LeDp4dGlufCfw2ErxwjT2K32vTdJEs8/wCqgyPmk784rnw+Dr4uvyz96s+r2ivPzKxmY0MBQbvyw7Lr
        6Hzx4v8AjVquu2i6NpkSeGvDo/1WiaWxjQr/AH55B80jepJ5r9FwWS0sMlOa5p93+h+U47Pq+LbjTfLD
        sv18zz0auzmXY3l20fLFBtMh7D6V77p6I+alOT3dx2gaXrPjK5uLTSrG91e/kKhYrONnIOfUcCsq1alh
        o3rTUfU3w+Er4mSVGm5He+MPgv8AEj4d6DHq+v6DNb2WF835xJwehIHQjvXlYXNsDjKjpwlc9nFZHjcD
        T9pUjZGX4K+K+ueA7oS6LqLW0E/EltIPNtLgd0libK/lW2Ly3C4xctSGvdaP7zkweb4nAS5qUtF0Z9G/
        Bf4wRXryt4Vs/s+oITcX/gSaXdb3QH3p9NZv9XKBk+X0Pavz/NMpq4V/vvh6T7eUvLzP1XKM9o49av3u
        q7+hBqXws8HaM1r8QIZ5da8GlS8UJT/T7i9eXJtZzjKYOQWbpjFTHF4itH6k1af4W7o6quDpUajxf2ei
        W9/M9B0zxbpn7S2gXXgzxA1po+vup1Hw/JaMWlsXj4CMx6yoeHUcFWryalCplk44ints/wDP0PSjVhjU
        8PPtofH3j/wzd6Dq119qtRZXkNy9pf2ijiC6X723/YcfOp9zX6jl2Mjiqat8vQ/Is2wEsFWatozkX3o2
        VP3q9c8ETds+X+L1oARSS+W60AOPWgdgoCwUBYTIoEKqAljQAgG0YoAlQHbwOKAGN940AJuTHIyR1NAC
        fLJ06DpQABt1ABv28MCR2oAkQsVGSM0AMdzGTJ3XigBrzlgoNBD3FK7zj+7QSHzMPlBB70ASLyPl4FAC
        8+1S0A9elKwEqPhQKVkAu+nYCWBVZtzqAvr3osBO+0MfLOV7ZosARIJ5UjJAB5osBHLFmRvriiwEMibh
        g/w+tFgIBuLFj93tRYBk6zRsCxyDVIAAwWxTAj3biFoNVsSyLjgc4oAjSTZInp60EPccpDMx3EUEiKCR
        wcigAX7xoAlHAJAD+uf4aADvgEtQA5BjPapYDAc0rAMYHcSeVqkAhdh93he1MB6kkfN1oARwHGM5K/wm
        gCNssvK7T6CgBq8KM0ASAEKD0FADW6k9vWgBKDRbBQMjf75oAcuNox96gBjuVYgnmg0WwgZD1GTQUSea
        ojABGPSgBi5lLbTt29Se9ADVYOMgcUGbHr900EkcQPpQBKXZWXP3aAJHxM2Rwo6UEPcaJGI6ZoJJEyVB
        6UALzQA9elQ0Au8gY24H94UWAkQ5XqT7miwC7XPTpRYCVNqqA4+bvRYCrs2Dj75+6aGwDcH5FK4EinYo
        I5z1ouBZtbOSfJjAwvJJ70XAhkUidhjn0FFwJkb5RyKLgDnpRcBfN8p+Oc0XAcc5ouA/JWMbDgn71FwG
        ojKfl4FQzN7jmznnrSEJQaLYXbgbqBj1c7QycHvQZvcduD/OB1oEJ5hPrQAg3M2RwfWgCYBgPmOW9aAF
        oAjePcxNAEcgKjn7vpQAwGPH3f0oAXAfpwB0zQAxj8xLgkdqtPQtbETbgcscincoCwRcr0btRcCJkcKE
        B4bmi4ETElOTz0ouBEeTs/vc0XAMk1a2NFsMlOBzxTGMUkDgb/UHtQAwmPPdvegBCQORwKADnqT8tAEq
        NHtHFACDG/jgUATDOKhsze4c+1K4g59qLgPVQRkmi4DWGDgUXATkelFwDmnc0Wwkf+sai4x2apARPIVb
        FMBryHA4NAEwJYA0AG3Hzd6hsABLc0XQD16UXM3uKZGh5P3WpXEHmY4A4ouBIrZUGi4C8LzkfnRcBS25
        AaLgQlXJ4PFFwE5H3jzRcBcOfunii6AkThQD9/uaLgOYnaMnmi4DV6UXAXD9jgUXAdHuB+Y5FFwJCQT8
        vSi4CUXAOgouAUXAaA284PFFwHMOfmYg0XAOPXP1ouAUXAKLgSKflHSi4C8joA/rntRcBN0eNq8zfwsa
        LgMbrRcAb7tFwNPwv4T1jxheS2uh6ReaxdRRmZ4bGBpXVAQCxCg8ZIH4iuetiaOGipVpKKemrsdNDDV8
        VJxoQcmtdFcpSoIJXgliaN0Yq6OuGUjggjsa3Uk1dHO04uz3G428L0p3EOTJPy8HvRcB8suVCgHFFwI2
        BBxRcBGI24yM0XAi3IOo5ouAKRliOlFwBCNh5ouBWYcmi4CbMjNFwFbATGaLgCfcIB+c/dPpRcCIhZEw
        OGWrRotiPJP3utMYm7y+fWgBRsXgjJoAQ4P3OPWg0WxGxG446UFEbjk8cUANoAkUYXpQAtAD1cqBnlaD
        N7jt6sMqMGgkPmH3jkUAGR24FADHILcdfWg0Ww3B+6T97kmgoUlym8HGzgCgCIqVOD160AJx2+960AKm
        QSCeaAH2tsb26hgDbfMbBY/wjufwFROXLFyLhHnkorqfcf7L/gaDSPAr668I+0a5gxq68x2acRJ/wLlz
        6lq/GM9xcsRiPZ3+Fn7jkuFjhqCaW6OmuPgzoWkeLIPE7PawaFaW88mp2d6hdShUkurdNo/uEYGBiuSO
        YyqUvqq1lfQ63gVSrOsvhtqeJ/GL4uanYXulRaDZvL441uNbbwxosSZ/sSxcbUl29riYc5P3Er6TA4SF
        p1a7/dx+J/zS7eiPmMwxs044fDa1J/gjpLP9kfxv8I/hcmueDriz1T4wXt1Cb3U7yMTmzgdv3q2u/gOo
        OTIeTg15WMzj69W5J6Ul0XU9PA5R9Qo80Naj6nnn7T3h4fDvxMg1P43eINe1u1DG20K2VVvbbzUBJaYE
        YiJBJz2OAK9PJFPET5aNBOPVs87O5ww1LmrVmpHkHwZ8f6n4D8ZXep2njDTvCGpajAIp/EWs6c2pMoDZ
        IBzuUn16V9PnuWwlhlGnHVdEfJ8PZlP60/az07s/WDwd4hsvEPhXS9TsdWg120ubZGTUrbHl3Bxy4A4G
        Tnjt0r8eqQlTm4SVrdD9khKM4qUXc0pLwA4GAKyly2vLYu19D5v/AGnf2YrD4s27eJfC2zQ/iFZfvre8
        t/3YvSvIjkI/i/uv1B68V9DlWbVMDU9lPWnI+fzXKaeMp+0WlVbWPKfgN8dLrVZtSv8AVLZovFGkDyfF
        mjSJg6naodpvFTtcQn7+PvLzX0GY5fTjGNSg/wB3P4H/ACy7ej6Hi5ZmE+V0q6/eQdmu67/I958FfAG0
        l8T65rEt0svhe/mhu9MtNOuHWGaPaGDSjqXDchgcY7V89icyqexjSa99aN9T6KlgIe1dVPR7FH9r74fW
        upeDbfxYYNz6ODBfhRlpLCUhZPqY22yD/dPrWuR4udKtyXtf80YZvgoYjDySWp+fuoafJpWpXdlMcyW8
        hjJHQ46H8Rg1+zU6iqQU11PwirB05uD6HqH7Pfw5Xx9440rT7qMtp4b+0b7I4MEbYjQ+zP8AotfK8QY7
        6rh20/L5s+34XwCxFbnqL3T2LW/jpYeKvFWvaBqHh9dV0CKYWj2lwQkcTIdvmvKPuB2KqvQYB5r4+jlv
        1WjGrTqcsnrc+5nmMq1R05QvHa3kaXijQPDPw007V/DmnxyaR4cghXWPFkgm3yiNv9RpkMnUCRu3ZfrS
        pTr46cPaS5pPSPb/ABEVY4fL6NSUY2S1k/8A20+RPiD8TLz4g+Ip9X1KNEiUCCxsYsrDaQjhII1HQAYz
        6mv1XA4KlltDljrLq31Z+M4/H1swxHPbToux0nw5/Z7+IHxRSN9J8NSW9ncH59R1EmGIL7Z5P4CuLF51
        gsEveqXfW251YLh/GYyV4xaXd6I6zxn+yN4/+GdpBqUui2Piixgfzp4bR3ZWA7MODj6Vw0eIcHjL01Nx
        b7npYjhjF4Jqqo81ux9C/sv/ALSvgLWPK8KHw9Z/D/XhiNbZECw3DeiuRnPs1fG5zk+Mpr6ypurB/gfd
        ZNm+Dn/s/IqU1+J9Ma9pdj4g0q507UIVntLhSkkbjPBr46hUnRqKdN6o+yq0416bjUWjPy5/aF+GMfwk
        +I19pCWwGmXR823O44GeRiv3PJccsww95bn4JxDlv1DEtxWjPOdO1+fTbmG6s3ez1C0cSQXMMhDxsDww
        PqP1FetUowq0+StrF9DwaVWdGoqlLRo+w/hT8T7Lxjolxrl6sI0/U3j0zxjpqj93FcNgQakijGAxwHA+
        vavyzM8DUwddUl01g+tv5f8AI/ZsozSOYUPata7SX6mhqN/a/AnxBJaeGvD0914rklkuLrVtagCQSRxD
        c/2X+BDInTBycc5NYxg8xhz15pRS0S3+Z3VJfUJqNGN3fX/gFf8AaZ8NWPjbSvDvxC02DyLHxVZx2l2C
        R8lxjdbSEjjIOUJ9DW+R4ieEryw838P5dTmz7CRxmHVWK1Z8cyRyo7KcoQcEHsa/U07q6Px/YZvK8Hk0
        wJUbKigB2UHUc1LYAxG3jgUrgRK5UsMVSAQcjOKYBvwfL7NQZskWTzFwBhulBIFpYeN2VNBothjA7jn7
        vpQUPWNHUK3yI3Ix3+tBmxrkFjtXaOmKCRvB6fe70AOjlbOw8470ASHrQAUARuxjYkDfu6g9qAFjfYcA
        7h60APaUk0AJ5xTnB+agBdrn7p4oAcjsjYPWgCZJSc1DYD02hdxHzGlcCZGDKCOPai5m9xVPLUXEIqYG
        7rRcBfMb0NFwFI81eetFwK08DoAqn5W5NFwIGmbPznjpii5otg3+bxHwB1ouMZKRGQV6e1WgEMm75ySn
        uO/1pgKt0rqRIvXoBQAxZTCo680AOWSSMnaeDQAgkVBhhlqAJFlGAQP3Y+8PWgBQ5V9x/wAigBWmZiSf
        umob1ATLPzGdo75OKVwF/HFO4EbqXYg9qLgNEp3dKpATbtw5AA/vd6YAOnDbh6mgCN/nYgn7tACGdiuD
        90UAI0qrGuP9WPvCgCNpDnmg0WwZzQUGRQAnmY4oAYx3HNADlby1HvQA07FkIIyaAFbls/wdhQA6HGWw
        MCgBTjNAEiH5RQAu7cdtADHkKjZ2FBm9xY3KoBQSO+c8g4BoAkQNjnk0AL5hBx1qGzN7j1lO0cUriF80
        +lFwHiR8ccUXAcMsMnrRcCrv2nqSf7vamwJFYsMkBT6UWAkhRpGKbgFaiwEytJGpRHI29cUWAREkkTzU
        JBXrmloA7Ea8Y+fuaNAEH36NAFbGePvUaAPTIXBIzRoAByHIo0Al3Z5NQzN7iiRF4IyaQhNwY8cZ7UGi
        2HJ3oGNoM3uPVZVheVI3MSkK0gU7VJzgE++D+VK6vbqHK2r20JYj+7FMR9Cfs7fs+aP8RfCniLxD4ukm
        sNDiQxWt1HMItjKN0kuSMEKMDkEct6V8fnWcVcHWp4fC6ze6tf0XzPusgyKjj8PVxOMbjBaJ3ttu/l92
        /Y8H1WC1tNUvILC5N5YxzPHBctGYzNGGIVyv8ORg47Zr6ym5ShFzVnbVdn2PiasYRqSjTd4puz2uujsU
        XfDEVoZj0bKAmgCGTmQ45+lACGRUXBBzQAkbpkFhuUn7tAH1n+1V8IvC1z4Fg8f+DjY2sVnHBDeW1mV8
        uSJyqRsAvRwSoPqP93n4DIMxxMcQ8Diru92m+61fy/rqfqPEeV4SWFWPwVko2TS2aei26/p6HyHjbxX6
        JY/MyN32sf50WAiaT5jxRYCNiSc0WATy93NFgGMjhjg8VSNFsd14L+Bvjr4iWyT6L4Yvby0I3LeSgQW5
        HciWQqpx7E15mKzTBYN8taok+27+5XZ6+FynG41c1Ck2u+y+92R1+pfsb/FOw00XkWh2+oxlN5SyvopH
        Ax2G4bj/ALufavNhxHls5cjm16p/1956c+GczhHnUE/Rr+vuPEZIJbWSSGaNopo2KPG4wysDggg9CDX0
        qakrrY+YacW09yOQEDL8qfuimSEf3BQA9N/L7DsBALY4B7D9DSv0HZ7kmc9eKYiRTx1FSyGOXq1KxJ67
        rH7NusaR8GLP4j/2zp0mmTQxzNaNvWZd7hAq/LhjkjPI7189SzilUxzwHI+ZNq+ltFc+lq5FWpZfHMed
        crSdtb6ux5Fg19DY+aE5osAbd/HpRYBN2ecgUWNFsEQklm2Ro0rscBVGST9KTsldlJNuyLD6de28PmTW
        k8SDqzxsoH4kURnGTsmW6c4q7TKjjzGx/drQzHq2VB/nQAufcUAMYOWODxUsDUg8MazLoEmuJpd5Jo8U
        vkSagsDGBJMA7C+NoPI4z3Fc7rUlUVFyXM9bX1t6HQqFV0nWUHyLS9tL+pRTlhW9jke51njv4X+J/h0d
        O/4SLSZtNXUIBcWzPghlOMgkdGGRlTyMjI5rgwuNw+N5vYTvyuz/AK7eZ3YvL8TgeX6xDl5ldf137rc5
        TO7mu+x54UWAMp3GTRYCzpNjc6xqVtp9hA91eXUqwwwRjLSOxwqgepJFZzlGnFzm7Jas0p05VZqnBXb0
        S8zU8b+B9e+HniK40TX7NtP1GEKzRFgwZWGQysCQwPqD6jqDXPhcTRxlJVqErxZ0YvCVsDVdDERtJEfh
        fwVr3jW8NroekXur3KgFks4Gk2D1YgfKPc8VdfEUcNHmrzUV5uxOHwtfFS5KEHJ+SuetaZ+xd8U9Q09r
        ptMs7BgMpbXV6glb8FyB+JFfPT4ky2EuVSb80nY+kp8K5nOHM4JeTav+v4nj+t6Ff+GdYvNJ1S3NrqNl
        K0E8JYMUdTgjIJB+oNfSUqkK9ONWm7xeqPl61GeHqSpVVaUXZozXGDmtrGI9fuiiwC0WA6T4d+AdW+Jv
        i6x8P6NF5l3ct80jfchjH3pHPZQPz4A5IFcWMxVLA0JV6r0X4vsjvwOCq5hXjh6K1f4Lq36Ht3jz9h7x
        r4fvVXwzJB4osWUHeXjtZVPcFXfb9CGP0FfMYTijB1Y/7ReD+bX4L9D6vG8I42jL/ZrVI/JP7m/1PLfF
        nwL8e+B9Mm1HWvDF5Z2EODJcjbJGgJwCzISBzgc+o9a97D5pgsVNU6NVNvpt+Z87icnx+Eg6lek1Fdd1
        +BwbY+XBJP8Ad7V61jxxxPPIC+wosA0lTwPvUWAXkdTzRYCNvvGiwDo+hosAq9KLAamseGNW8PW9jPqe
        m3WnwX8K3FrLcQsiTxkAhkJGGGCOnrWFOtSrOUack3F2dns/M6KuHrUFGVWDSkrq63XkZfmn7vYVvY5x
        QOKLALtPpS0ASjQD6u/YGshFrHjbWJBiO0s4Iix9GZ3P/oqvgeLZXhQpLq3+Fl+p+kcGQtUr1n0SX33f
        6HyxNO91NJNK2+SRi7MepJOSa+9UVFJI/OJNybb6jcn2p6CE34o0ACzvwDgDpmjQADs3LHmjQDtvg/8A
        Cu9+Lvji10S0zBDgzXl2VytvCPvOffkADuSPrXl5jj6eXYd1p6vZLuz1sry6pmeJVCGi3b7Lv/l5mh4q
        +Ey3HxJ1Lw14BmuPGltbnKXFpFu2jHIZh8vynjfwpPT0rLD5glhI4jHJU2+j/q+vbc2xGW82Mnhsvbqp
        dUvze2nfYl+B/wAF5/iprsst3J/ZnhTTB5+q6nKwRI4xyUVjxuIB56KMk9gYzXMo5fTSguapLSK8+/p+
        explGVSzKq3N8tKOspdl29fy3N7416bH8S7y41v4feA5NP8ABWg2xgfVrW0MSXSp1lbpkKB7tjlvQceW
        SeCiqOOr3qzd+Vu9r9P60vt592bU1j5Ovl+HtRpq3Mla9uvy++2r8vDm+7X1Nj5Ejb7lFgIsGiwCc+1F
        gEftVI0Wwj/eNMY14h5Ltnk9qAGKcN+VABLzQaLYgI5oKDc465K0AeueKf2a9e8IfCLTviHqOoadFYXy
        QyJpzyMtziU/uwoK4Y7fmIByBn0NfP0M6oYjGywUIu6vr003/wAj6HEZJXw+BjjpyVnbTrrt/mcj8MPB
        M/xG8daH4ahZlfUbpIndeqR9ZHH+6gY/hXpY3ErB4aeIf2V+PT72eZgcK8biaeHj9p/h1+5HYftQeHfC
        Pg74r3mgeD7BrGy06CKG5BneYPcEbmILkkYDKCM9Q1edkdbFYnBqtipXcm7aJafL+rHpZ7RwuGxjoYSN
        lFJPVvX5/wBXPJm+7XvnzbGr0oFYlT7tAiSzsbjVL+CztIXuLq4kWKKGMZZ3Y4VQO5JIFTKUYRc5OyRp
        CEpyUIq7eh638Yv2WvF3wb0aDWb5rXUdHYRrLdWr828rD7jqeeuQGGQeOmcV8/l2e4XMZulC6lro+q7r
        /I+kzHIcVllNVZ2cdLtdG+j/AMzxzqj96+iPnT7h/bvs9A0vwF4dlj0Swi13UL0E6hHbIk3lJEdy7wAS
        CXTgnHFfmPCsq08TUTm+SK2vpdv/AIDP1DiyNCGGptQXPJ72V7Jf8FHw+y+Yd3rX6cfl5EwwxFADSuCG
        oA6XwJoMniXxBFYw/wCtvpYrJMDnMrhCfwXca8fNK3sMO5HuZPQVfEpM/QLxR4qb4e6npOiaboEmpQNA
        qRRwuI1ijQhSzMeiqB0xkkjFfj1PDvFqVaT1P2eWIjQqQoQ2sVPjbq1pHZ6dot65j0hopNa1lQcFrG2A
        fyj/ANdJNie/NVl9BzcpxXvN8q9Wc2PxCp00r+b9EeSfsTeF3+IPi/xj8dvFpjVnuJbfTnnIEduoH72Q
        Z4AVdqA9gDXv5/iVThSy3D7RSv6nj5Fh1Uc8fVWsnp5I7f8AaQ/bJ8PeH/hZHN4B1f8AtvUPEEtzpun6
        xpbK8NnNEB5jsx4JXPQZ5rx8rymrjcV7OUdI7nqZrmcMDhnUW5+eeueJdY8Waj/aOu6nca1qflrE17eE
        NKyjoCQBkda/acJhKGCjyUY2PxDG42tjpc9eV2Uln28AZruXLHZannNNq9z6G/Yv+OkXww8a3mi+JPEk
        umeCZbCaaG2nObaC5BDEjuCwzgDgmvzziTKJVlGth4+9fU/S+G84VJOliJe6fT/w9/bR+HnxQ8aL4Y02
        TU7C/uWZbGXUbfyor0jkqh7HAyAetfD4jJ8XhqaqzWh93QzfCYuo6VFjv2kfj1efBPRfC1/Yw2l3Jqet
        w2NxbXOdxtiQJXTHO5cjnpXLl2F+uucYbJX8joxmLhhXTVT4pHiH7WFg/wAIfjD4W+Lvh+MLFezi31SF
        R8srhR94ekkRIPqRX1eQ11isPVy6s7vp/wAA+Vz6g8NWhmNL0Z9R/APxGtroWr+H7BvttpYImo6MGb79
        hcL5kKZ/2Duj/wCAivm8fRfPGpJ2bupeqPo8vqqVLlT816M1vCXivUfihb69pHiLRE03TNQSe3s4nJLy
        24/dszZ/vEkgemKwr0Y4fknSldrc2o13Wk6dRb7H5y/ELQrrSNXhhlz9piDWEuTy0kDtESfcqqH8a/Y8
        tqqpR06a/efi+dUHTxTa6n07+y5pzeGfAfifxU2n3OpO90tjDDZhfNaCBdrFdxAxvyTzX57nsvrGJjTv
        pv5H6VkUfqeC9pby8zY8L+JrbxD8QRFrOjafLbaNZTazdX6WTWE8ES5CRTRklZQ2e3HGa5Z0Z06Cs/j0
        Wt18ux1KopV22rpanz7+0l40ux4d0TRrhxHqOvyN4o1YA8lpTi2iPskeMCvteHsLBOdd7R91fq/vPhOJ
        cXPkjQT+L3n6dDxLw74ov/CetQX+l3MMN7CMJJLEsgB9cMCM19jXoLFQdOroj4bD16mGn7Smrn0b4D/4
        KDeNfDlxHD4jsLDxHp6kKxgUW86j2x8pP4V8XiuEcNUvKhO0j7rCcW4mm1HEQuj7H+Fn7RHgz4xaLNea
        FqAFxbR77rTrgbbiAY5yv8Q9xX55jMqxWAqctSN9dH0P0jA5phsdT5qTt5Hx5+2H/wAIJrFydZ8M2Gq2
        GspKouLpLB4LQnPDBzjDZ9OtffcPPE3eHxElyvzuz894jjhoyWIoxfMn2PWv2Tfjz4i+Ivhe/HiHVLSc
        aKkVmkUaETzccTSsfbjArw89yujgqyVJaSPouHsyr4+m1Wex5t+3ne22qr4XvkZfOJkhc9yByP617vC9
        N03OC2PB4v5ZRhJHyS0uyUSbl5GcV99GfLq+h+ZcvMuU9N/Z78WW/hv4l2un6g4fQtfjbSNQiJ+UxS8I
        x/3Wwa8LPMJ7TCucfjjqj6PIcU6OLUH8MtD621G7uB4R0nxFqttY67q/h0XPhq80/WLkpBI8bELLGuDm
        R0APbINfmlOE/aujRuoytK67H6tUnH2PtppNr3X6ljQNdPxu/Z38Z+H/ALBpenXOmW3n6faaXlVgCjfG
        Ch5DAqRkcc0VqMsBjqc1K/M92a0KscZhZ030R8T+J7dIdXaWPiK5jjuVBPTegYj8CSK/WsNU9pTTPxzG
        Ufq9eVMyQfnNdJxC5HmHmgB5+8tSwHNgSktyD0pWAZJnecnJqkA3zCp55X0pgMYAkuo69qDNjllyooJB
        TliaDVbCk/vDQMlHSgzYx/vmgVhuc/dIB780CDKnHOwdsd6AB1f5eNvtQApcrwetBYpZCnI5oIGrjHHS
        gA+Ynhhj60AG8rwTzQBIsjFRs60AClwxeQ528UASAKG4YgVLAlEoXgHPvSsBIkhBzg4osQ9x7HJzRYkV
        HcHg8fWiwDzKc8nJosA0Snf70tAEcvLIYweGo0AryWrPIflLH2GaehotiB1MLYA60WGBG1MVYCA+XGPe
        gBAnlrnNADGbc2aAE8zbxQAomXvyaAHrNwMdKAF800AJ5pzUtAHnL3BJpWAXY0nzINwPZu1FgEdzGAu7
        djvRYBxbdzVIApgIXKj2HegBQykZK5P0oAjfG44HFA7ETj5jQFhdwZVUDB9aC1sI6lWIJyaChtABkpyO
        c0AGADjfg+goAYw54OR6mgBOfUUAPVyBigBTLj/9dABndzQBIn3BQAK+JlFADickmgzY9SNo5oJFyv8A
        FyO1ACpIYie5PpQA5AdmB98/dPpUsze41nw2AKVhCpLg0WAnzu5osBIpjC/M7KfQUWAr8gelF0aiNyF7
        0XAkX71FwJA7h+DgUrgPklkQdc5qHuAxXZRg9aQEyHctBm9xaBAnVqAHI2xAaAHBzIN3rQA9Tx1oAX7g
        8zPK0AGc8+vNABQB9qfsm6T4U8ffArXPCF2YZby6uZTf2xI84BgojlUdcLhcHsymvzPiCpicJmMMVHZJ
        WfTzX+fkfrPDVLCY3K6mDna7b5l16Wfy6eZ83fCf4P6l8UfiCPD1mStnbyE31+nKQwq2C3pk4wo7k+gJ
        H2uYZjTwGG9vPd7Lu/63Pz7Lcqq5ljPq8Nlu+y/4PQ+zdRT4U+OfDf8Awr638WQ6fpWhuI7jTrS9W3Eo
        j/hd3X94ob5iUP3hknIr81g8zwtX69KleU9m1e1+yWz7X6bH6xUWUYyj/Z0a3LCnvFNK9u7e66uz33PM
        vGHxi+DPwhsptL8FeFNL8TaoFKGfyRLCvGPnuH3NIPZSQeeRXuYfLs2zGSqYuq4R7Xs//AVZL5/cfPYr
        NckyuDpYGjGpLva6+cndv5aeZ8fOxkZn2gZOcKMAV+irQ/K3qBBCZP3fSg0Ww0SKBhBg0DOs+GHw21b4
        seLYdA0mS3hvJI3lM12zLGiKMkkqCfQcDqa4MdjaeX0XXq3t5bnpZfgKuZV1h6LSb1120+8+g9H/AGA9
        VlcHVvF1nbID92ztHmJ/FmTH5GvkKnFtNfwqTfq7f5n3FLgqq/4tZL0Tf52N2X4DfAj4W7v+Es8UnUbp
        OZLW5v8ADcf9MYAJMfXNcqzfOsd/utKy7pfrLQ7Xk2Q5d/vdbmfZy/SOpyfxU+InwAvvh3q2h+G9CVNT
        eImyvbPS/KkSYcoWlfD7c8HOeCeK78BhM7hioVsRU93qnK+nXRaHnZjjsgnhJ0MNT962jUbO/TV627ny
        mRldn96vvbn5yRscpRcCE5p3NFseo/Dr9mj4hfE1Y59N0ZrHTnGV1DU2MELDsVyCzj3VSK8LGZ3gcFpO
        d5dlq/8AJfNn0OCyLH4/3qcLR7vRf5v5Jl/4t/sweJ/g9a6Xc6pqOlXtvqN0tnD9ilcyCQgnlGReODyM
        9s4yKzy/PMNmLlGnFpxV9bbeqbNsxyHE5YoSqyi1J2Vr3v6NI+gf2iNE1/4n/EbQPg54Z1KHR9JtNHF9
        OJWZY5SpKojhQcqoRMDGMsTzgV8hlFWjgcLUzXER5pOVl+rXrd/cfZZzSr4/F08ow0uWKjd9n2Tt2svv
        LP7DmpX2l/DzxtpNzIXk0bUXKRltyxsY/mC+26Mn8Se9TxPCE8TRqRXxr9f+CXwpOdPC16Un8Ev0/wCA
        fBrH7Q5llkZtxLOWOSxPUmv1RK2iPyVtt3Y3p8ucjsaYhSMLgc49KAPrj9nfT/hz8Rv2fdT8AaxrFpo/
        iK4vZL0vcSCORZQAIpULYDgKMFQScb+mc1+fZvPH4PMo42lBygklpqrdU+3r6H6Nk0MvxuWSwNWajNtv
        XR36NX39PU4vwn+zbodp8LdT+IXjbxDcw6NaXEtvFaaNGjy3JSYwgpI2V+ZwQPlIxyTXqYjOa0sZHA4S
        mnJpO8tldX1S7Lz8jysPklGOClj8ZUagm1aNruzto3pq/LzO6/Z8+FXwg+N1nremnwxq2ia1ppQuZ9Ve
        WVkJI3AhUUHI5BTjIxXk5vjs0yyUKntYyjLtGy/Nv01PWybL8qzWM6fspRnHvK7t9yXrofMXjHTLPRfF
        ut6fpss02n2l7Nb28lxjzHjVyqlsYGSB2Ffb4apOpRhOppJpN27tHwWKpwpV506bvFNpX3smfXXjAk/s
        B6Rnn93bf+lVfn+G/wCSjn8//ST9GxP/ACTEPl/6UfFzMQa/SLn5eJknvTuB9Mfs5fsv+Hfin4DuvFni
        XW72wtLe6liaK1McSLHGisztI4bA5OeBgDrXxWc57XwOIWGw8E20t7vV9LI+6yTIMPmGGeKxE2km9rLR
        Ja3dya++J/wO8CTzWvg34Yt40uYAS99qpLRMB/GBIJDjp/AgqI4LOMUlLF4n2afSO/ppb82aSx+S4RuO
        DwvtGustvXW/5IwZv2z/ABmCIPDWi+H/AAxA3yxxadp4L9sD5iQe3RRXUuHMI/exE5Tfm/6/M45cUYxe
        7h4RgvKP9fkekfs8ftTeNPFPxXtPCHjTybq31JJIV32qwSW8qoXGQAMhgpXBHcHPUHxs4yPCUMG8ThNH
        Gz3umr2PcyXP8ZiMasLjNVK62s07X/Eqft/aJoWhJ4R/s/RbCy1C+kupJ7u2t1jkdUEQCsVA3cuTznGP
        etOE6tar7Xnm3FWsm773/wAjLjClQpex9nBKUr3aVnpb/M+PpP8AVLX6Hc/Nhr9FouB1Xw28A6p8TfGO
        m+HNKXN1eSYaUjKwxjl5G9lGT79ByRXFjMZTwVCVepsvxfRHdgsHUx+Ijh6W7/BdX8j7L+NWuyfDbwRY
        fBf4Z6RLq+u3enuLqOGHzXhtSD5kjjGPMkJbk9M9srX5xltNY3ESzbMJ8sE9NbXfRLyX9dT9PzSq8Dh4
        5Pl0OabjrZXsurfm/wCuh41+yV8H7bWdUvvH3ilBb+FvDIec+ep2yzxrvJI7rGBuPqdo55FfSZ/mUqcI
        4LDa1Kmnonp+O33nzHDuWxqzljsTpTp669WtfuW/3H0h8M/iRpH7VkXiWz1fwZC3hTTpY1tZ79xI8sh3
        ZOABsYKAflYkbsZOa+MxuDqZC6c6Vb95K97dP816o+2wGOpcQqrCrQ/dxtZvW71+527PS58R/G3TfCGk
        fEnVrPwPNLNoMLhFMjl0Eg++sbHlkB4BPX1IwT+nZZUxVTCwnjF77/LpfzPyrNYYSni5wwTvBfn1s+qO
        CbOa9W55A5fujNFzN7nb/Bfxrp3w3+J3h7xNqdlLf2VhK7ywQBS53RsgZdxAJUsGAJH3eory8zw08bhK
        mHpuzl/mn+Ox6uVYungcbTxNWN4x6L0a/Dc91/a3+KXw3+LHgjQdT0K+Nz4miuNixmBkljtyrF0lyMYD
        bSOTyTjgk18tw/gcfl+IqU60bU2u+l+lvlv+J9fxJmOXZlhqdWhK9RPtrbrf52t+HU2f2Y/EN54P/ZV+
        Imuabsiv7S7uZIJ9gOHFtDtPPXaTnB4/OubO6UMTnGHo1Nmldf8Abz/M6sgrzwuSYmvT0km7P/t1fkaf
        7HvjPWZPAPxM8Sarqt3q81sRcgXcrSkOkMjseSTz8v5CseIsNS+s4bD0oqKemmm7SN+GMXW+q4rE1ZuT
        Wurvsmz4xu7ue/vri7urh7q6uJGmlmkOWd2OWYn1JJNfpMVGEVGKskflk5yqSc5u7erGMcHLnK9hVXIE
        ouAqhWYDaWY8AAdaLgfo5+y18D0+E/ghL2/gCeJ9VjWS6LjJtk6pAPTHBb1b12ivxvPs0eYYjkg/3cdv
        Pu/8vI/c+HcoWW4bnqL95PfyXRf5+fojkfgFovxUf41+KdU8eXmox6faQSRbJHZbGZ2cbDAv3CgVWOQM
        jIzyTXfm1XLVgKVPBRXM3/28tNb9b3/4B5uTUs0eY1quPk+VJrryu70strJf8E8C/aj+O158T/Gt5pmm
        ahL/AMInYN5MEMUhEV06n5pmA+9k5256KARgk19bkWVwwNBVKkf3ktX3Xl/n5nxnEOcTzDEyp0pfuo6J
        dH5+fl5HiKn5RX1Fz5EY33jRcBMY5ouBPYC3lvrcXbvHaGRRM8Yyypn5iB64zUzclF8u/QuHK5Ln26+h
        986P+zF8FPBMNrdatdRagJkEkE2t6qqJICMhgqlFYEeoIr8nqZ5m+KbjSVrb8sf87s/ZaXD+S4RKVV3v
        tzS/ysmeA/tS+Lfhne/2b4f+H+jaZG9nM0t3q2m26RpJlcCJXAzIOck5wMDGecfWZFQzCPNXx03qtIt/
        jbofGcRYnLZ8uHy+Efdd3JJL5X6/1Y8M0TSpda1WwsLbm4vJ47eMerOwUfqa+qqVFShKpLZK/wBx8fSp
        utUjTju2l959aft46hHofhnwJ4TtRizi8yfZ6CJEij/R3r894Vi6tavipbuy+9tv8kfpfGE1Ro4fCQ2V
        39ySX5s+QARgY6V+jXPy8DLt4ouBNGyMh3Eg9xUMD2L4f/soeNfiP4T07xDpE+kJpl8GMX2m5dXG12Q5
        AQ91PrXzWLz/AAmDrSoVFLmj2XlfufV4LhvG4+hHEUnHll3b727H1p8AP2f5/hX8P9d0XWb6G51DWnYX
        E+nMwWOMx7FVGZQSRlzkjv045+BzbN1j8TTrUo2UNr9736fI/SclyWWXYSpQrSvKe7Xa1tLr16FCD4df
        Ab4NyKmoDQotQiIJ/ti6W5uM9m8ticduQorZ43Osy1p83K/5VZfev8zFYHIcrdqnLzL+Z3f3P9EfK/7U
        Ufgefx/DqXgW9tLmzv7YTXcViMRRTbiDgAALuABI9ee9fdZG8YsM6eMi04uyvu0fnXESwLxSqYGSakru
        2yf/AAf63PI4kjkiIdsEdq+iPliMAScA5C9M0AavhXwvd+MfEVlpNk0MdzdPsV7mURxoMZLMx6AAE/hx
        k1z168cPSlVnsu2rOnDYeeKqxo07XffRfNn1z4c1j4OfBbQf+FfX2sSa7ea6Ui1rVNMkIiTPRXlRwVjG
        SNqknBbd1Nfn1anmuZ1Pr0Icqh8Ke/yTWr835WP0zD1cmyml/Z8587qfHKO3zaei8lfrctfF3Ttbj1ez
        +EvwpttI0DTb/Sm1KeW2mEct2u5lMZcZPIAOTywP3sAg55fOk4PM8ycpyjLlV1ovO39W7XNczp11UjlO
        VKMIyjzOzs35X/q/exzvwt+POn+DvEUPwz8V+FdK8K+FbaOS0vI7vNyzXIwd8zH5WDEHJ2kfMvOBXdjs
        pqYmk8xw1WU6js1bTTsuunr+Jw5dnNPC1llmLoxp0ldO+vvd29nf07dDy349/tAeJPFniTWvD2m63HB4
        Nt55La0tdIHlQTwA4UsRy4IxkZ2+gr3MpynD4elCvUheq0m3LVp/p+Z8/nOdYnE1amHpVLUU2ko6Jr9f
        yPE2619Pc+TIn++aLgbvgXwzH408X6PoMl/Hpi6jcpai7lTcsbMcLkZGckgde9cuKxDw1CdZR5uVXsd+
        DoLFV4UHLl5na/qfZnhX9gHwrpzLJr+v6jrTjny7ZFtYj7EfO35MK/N8RxbiZ6UIKPrq/wBF+B+pYfg7
        Cw1r1HL00X6v8TgdV+C/w2+K3xyHgfwXN/wj9hounyyajeW5e4N1OsiKY0MjnlQ3L88gjBxmvWp5nj8B
        l/1zFrnc2rJ2Vk03d2XXsePUyvLswzH6lg3yKEXzNXd2mlZXfTudh8NvBvwXs/i7c/DvT/B93r+rWCS/
        a9X1giaINGBuGzO3GTjOxefUYNedjcTm0sEsdOsoRla0Y6PXz3/F6HpYHC5PHHPL6dFzlG95S1Wnlt+C
        1LiT28f7TCfDzVPhj4bt/BuoRyjT5X0SJS4jgMjSo+NrZYFSAOMr0PXJ8zyr69TxM3Vja/vPq7Wa9PvN
        U4rN/qFXCwVKV+X3F0V7p7b/AHHgX7ZHhPwn4J+KUGk+FdLj0sLYpNexwuxjMrsxACkkL8gU4GBz0r6r
        h3E4nE4R1MTLm1svRf8ABPkeJcPhcLjFSw0OXS79X+Wh4V0jFfU3PllsR0XKPrP4ffsDa7d6ppl/4i8Q
        aSdELRzyQ6a0ssk8XDFAWRAu4cbhnGc818Hi+K6MYShQpy5tVrZWf3s/QMHwlWlOM8RUjyaPS7uvuR9A
        /tJ/Czwb408LWF34x8QXnh3QNCjllSCxmiiSRioCgB0bcwC4VRz8xA618lk2OxWGrSjhaanOdt7v8mvm
        z7DOsBhMTRjLFVHCEL7WX5p/JHzP+w94ehstf8UePr+Nl0rw3pkpWRuzspZsH1EaPn/fFfbcT1nKlSwU
        PiqSX9fe19x8PwvRUatXGzXu04v+vuT+88H1k63401TVfEctjdXLXtzLdXFxFCzRh3Ys3zAYHJr6ul7H
        DQjQUkrJJK/Y+Sq+2xM54hxb5m23buc433jXSzkEpXACfL5H8VFwPqT9hP4RjxL4yuvGV/AH07RD5dpv
        GVe7Ydf+AKc+xdD2r4fijMPY0FhYP3p7/wCH/gv8mfd8KZf7eu8XNe7Db/F/wF+aJv2qfHF98cfjNpHw
        68NXH2mxs7hbUCJ8xS3bf6yRsdRGvy57bZPWpyLDQyvAzx1dWbV/Pl6L5/5FZ9ip5pj4YDDu6Tt5OT3f
        y/DUf8Tf2Dde0rXNN/4Qac6xpU4VLk308cUtqw+85zgMh6jaCR0wepWC4qozpy+trlktrJtP/g+uhWO4
        TrU6kfqb5ove7Sa/zXpqfR37Q/7O6fHuHQIm146HHpTTttW08/zfMCAfxrtxs9857V8flGbvKnUfJzc1
        utrWv5PufZZxkyzZU17Tl5b9L3vbzXY/OHx34QvfAHjDV/DmogC7064aB2Xo4H3XHsykMPYiv2HC4mGL
        owrw2kr/ANeh+MYvDTwdedCpvF2/4PzOfZcMQK6rnKJsB78/Wi4HtH7KukC8+LPhfep8v+0HlzjgmKBm
        A/NxXyfEM+XDSXkfbcL0ufFKTPqzVH8P6t8Vo7RtB1B/EiX8Zi1p0JihjUcqjK3A7YK9Sc1+e041KFH2
        ia5WtvM/Q5TozxHIl71zyP8AbO8RSWmhfEWSN9rSnTfD0TD+BTmeUfj8ua9/h7DqdSkpdLyf5I8DPa/s
        41HH0+RwvgLxl8YPGP7N1v4F+HXw8t4PC7WMun3XiDUrlYzdSOzea0QYgEHcRk1njcPg6ePnVxE3du6t
        09TbA18VPBQhh42supb+LngPxz4s+Cnhfwpb/CrTPBkPhl1u57211a1W2bbHtkYIDn5uvNTlmLoYPGyr
        +1fLLfTU0zTDV8dgfZuK5vU+eNB8GWQ0O41vxPd6tp1pHIY4dK03TJJb65/6afMoWOL/AGyea+yxOcqp
        VVPDta9XsfF4TIbUnVxC26It6N4Y8I+OLW5HhzUNf0jUIkZ4hrdobiyuiB/qxPED5bnsDxWc8zxWDmvb
        2afZ6miynC4ynzUbp+ZZ8Jfs6fEfx7o8epaL4a+2WzsUKS3McUqODja0bkMD6ZHIrpqcQ4Gn7spas5oc
        NY56xWh2/gz9nj4n/DPxlpXi3XPApnstCZr7yG1WGD51U7GdichATk45NeJmmd4PMMP9XpPfTY9vKsjx
        eX1vbTVyXxv8Jvjv8ePEMHjnV/CggSQRtYWL3yW8UEKsGCxhjkbupbGTnNceExeV5fh5YaL1as7I7MVh
        Mzx1eFWrGyi+p6F+1Zr3iLWPgo8Ou+BbvQBHd2khvJNTguY43GQQAh3HPTNePkFKEMzg4Sv/AJHq55OU
        sBKLWn6nd/sX+JpL/TPh3O7GR3stR0GYlv4YJFliB9wGauniGgo1a1l1TXz0OXIKspQhzdU19x614Ptd
        L0P4qSvc+LbzUNdlu5reLQTOuyCHBw5iAyAAByTXgYis6lHljGysnfzPoacVCtd73sj5c/aC0uJPjdca
        UyhI38RSuSOpEqWrH9S1foGRVGsFKfkvwv8A5H53n9NPG0qfn+bR9J/s96HZ2fwE0VNQMb2F3FPPdeec
        R7XkO7cfSvgc1nOpj5KG6sj9FwFGnSwsVPYi8eeA/DXhH4W+Jr/wrCI5ddjt9O+0JctOhjeQKFQsTheT
        wDSo1q9avCM/s6kVqVGjRlKn1Pi341aXd/Er9qLV/DOlyQxXBuU020887Y0WKIADPbpX6Vl+Kp5flUcR
        VXW/3n5hj8HUzXNHRpv+kcx4V+BHirxd4w1/QdPWzU6BKY9S1W5nEdnbkDPLmuqrn2EpYeniXFv2nQwp
        cOYmtXnRvaMepvap+y14mXwtqPiDw5rnh7xvYacpkvE0G8EssIHJO3vjB/KsKHEdCtVjRqRcVLa5rW4a
        rQoutTlzWKvhz4W/EDwjpvw++IPhe6ia+8R3iW+ix2UhE7SHPyyDpswDnNOvmmCxLrYPELSK3NcLk2Ow
        saeKw71b2PtL4g6ZL8QPBL+FfHOveHdH1GZIX1GwGpqGgkBDcegOOPrX5/hcZTwlf21GLdtj9GxOEeLw
        nsK7V3ufKvww8z4RfFfxXoVrqVlrEE8MUcMulz+dC5Z/3abh1YZ5r7fFV447BRxFVWPi8toPAY+dClK6
        Nb9sDwf4t8P3ng6w1e0W4bUZHW0FoxfdMcARn/a5rPIMXRqQq8rtbUfEWErVHTpRWrOR139lTxJ4Vjto
        vEfijwl4d1CWITDT9Q1NY51U+oro/wBaMLVb5acm1pdHmrhSvG3NNK/c818X6FL4A1m0h/tnTdYlVFuU
        udIuBNGhDcAsO/HSvZwuOWOpSlytep4uLy95dXjaSevQ/R3wBoen/ErUfFmlahLcR2ep22l66/2dwrB3
        gAbBIOASvOK/JsTOWEUJQ3i5L8T9bwkY4pST62f4Hpvgb4c+D/CGnXVn4atrcbEktpJI5BI6hvmMbN9e
        cGvIrYnEV2pVT1aWHo0YJU13PzO+JMUdjqGm28a4aC2khfHql1Og/RVH4V+3Za5Oj739aI/F875frXu9
        v1ZyGc816p4AUAHnY+Q8CgB6vsGOlADs5qWAxhhsjqaVwG5L8rwe9UgELLnggUwFEuOBz+NAATnmgB6v
        hRUsBrHJzSuAmUH3hz9KpAICCxI4ApgSiTzfmPU0ALvI4oAN2eaADnv92gBjgAlhQA3O4ZoAer4AFAEk
        bDOW5B6UAPZ2VjuOVqGzN7iR4ldiBgD1ouSWEuC8QQ9FouAqOZAAaLoBSu3ii4Dx9xaLgWVQRRmZueyi
        s3uBGjC2XkEs3JpAL9pkR0aAEMBzS6gVZt3mNk8nk10RAhkjdhnhQf4s0m9TRbDFG0Y3bj6mlcoSTkHv
        jrVICAkpzimAgYyDd60ASxICDk4JoAQKGGM/doAFbLE0AOY87/7vAoM3uOjGG/Wgke8hVdw52cVLYCIV
        2jcOTz0pXACiscjgelFzRbEbtsYii5QqyHymQn5WOcUXAeZ8/d6dKVwAHdzTuBG5G40XAiZXLEqeKLgC
        ZGQetFwEI3pgnpVIA84pGMdTTAjxt+bPWgBPML8HigAYbQAOaADDmTg8UAS5UcOMt3oAYwZiSmdtADkc
        qoB5P1oAkjO45oAeeTxz9KAIn5Y0APVhtGOGoAehMZBJyTQA9n2HANQ2ZvcPNNK5IinL5p3Alwx6dKV0
        A9ZCgwTz9ad0BAQQeW3CiwD0IzxwKAJqAA8quKAJegFZvcApAI+WC7DgjrQQxxYMcDpQSPUBVxQBIqgj
        OaAHYI4oAaPvmgCQlQw3cigB77Wf5Bx6UAb/AMP/AAZcfEHxlpHh+1lWCbUJxCJnXcIx1ZiO+ACce1cm
        LxMcJQnXkrqKuduCwssdiYYaDs5OxvfGD4Taj8EfFMWlXep2l9JNB58c1m5DBCSuHU8qTg+oI79a48uz
        CnmdF1Yxas7a/p3O3NMsqZTXVGc07q+n69h2kfE7xd4M8L3fgjSNuifarhlvHtoSl7O5O3y3cnIx0wuO
        /qclXAYXE1VjKvvWWl37q80v87k0syxmEoSwNH3LvWy95+Tf+Vj29fgf4F8BeL9N8IDw7q3xG8ZzWQvZ
        rVr5LOzgXnJLDBHIPDE9V9QK+X/tTGYuhLFe0jRpJ2TteT/r5H16yfAYLEQwfspV6zV2rqMV8/8AO/Tu
        elfCTwb8Ovito2rw33wx0/w5qekXz2F3YORJIjAA581QpPUj8O/BrxcwxOPwFSDhiXOMldP/AIGp9Ble
        Ey3M6c41MIqcoPla3f36HxD4sWxm8U6z/Y8As9M+2Si1h3l/Li3nYNzcnjHJr9Rw/P7GHtXeVld+fU/H
        MV7P29T2KtG7svK+hjyRtGu1uSK6DJbEBzQM+o/2CfDzXfjbxFrTDdFY2C2yn0eVwf5RN+dfDcWVuXD0
        6Pd3+5f8E/RODKHNiatf+WNvvf8AwD0nx/8Asr678UviDqut+J/GrQaC0pNrY2ys5ihH3V+YhEwBkkBs
        nJ714mEz6jgcNGjh6N59W+r+Wr/A97G8OV8xxc6+Kr2h0S6LtrovxOs8B/s0fCXTIDLp+l2niSSJvLku
        b25F58wHRlB8sHnONo61wYrO8zm7Tk4X6JW/4P4np4PIMppq9OCnbq3zf8D8D5V+JVte/H7xHYw/D34W
        SaHY2Akh32lmsPnZYczMqrGmCDgEnq3J7fe4JwymlJ47FczlZ6tu3pu39x+dY+M86rRWX4TkjG60SV/X
        ZL7/AJniWr6TeaDql3puoW72l9aytDPBKMMjqcEH8a+npzhVgqlN3T1TPlKtKdGbp1FaS0aKDcsa0sZF
        jS9VuNB1ay1K1ZVu7OdLiFnUOodGDLkHgjIHBrOpTjVhKnLZqz+Z0UqkqM41Ibppr5H0jrPjr4u/tWw6
        ZHo2jXGm+HreZIbmTTZTFA84xvkd2YE7QwIQE49zzXxlLC5XkLk6s1KbWl9Xbtb9ep93VxebcQqKowca
        adnZ2V+rb8u3Q1P2tvF914g/aH8H+G5IJoNO0m4ttjSIVE0k0iM7rkYIACLn1Vq58gw8aOWVq6d5ST+S
        Sdl+b+46OIsTKtmlHDtWjBr5ttXf5L7z0zQbs6t+3X4mB4j0rw+qFu2CsDc/jMfyrxasfZ8P0/70/wD5
        L/I9yjL2nEdX+5D/AOR/zOO/YuvjqHhH4tTbtyyyCUMe+6OY5r0OJI8lbCr+t0edwxLnoYt99fwZ8VN0
        r9MPy+wxelAWN7wD4SuPHvjfRPD1o/kzaldx2xl27hGGYBnI7hRk/hXJi8RHCUJ15bRTZ14TDSxeIhh4
        7yaX/B+R3P7Rfwl0P4N+NY9C0bX21uTyBLcwyxBZLRj91WYHBLD5sYBAIz1BrzcnzCtmVB1qtPl108z1
        M6y6jlmIVClU5tNe6PbNePk/skfCDRIeuq63CjKP4lM07kf99MtfM0dc6xdZ/Zi/yS/I+praZJg6K+1N
        fm3+Z6/4Amhm/a++Jgt0VRHpVkkzL0aTZEcn3wcfhXz2LTWSYbm/mlb0uz6LBtPPcVy9Ixv62R4j4Aa0
        T9lb4w3t3aw3FwdWdRLNGGwzeSqEZ6MC5II6E19Ni1L+2MJCLaXL/n/kfK4PkWS4yckm+Z7+dkvzOo8R
        sLn/AIJ9WDnBKRwAEHoRfBa4aK5eJJL1/wDSTvr+9wvF+n/pZ8XfP2PFfpNj8vE4/i5NFgPvP9mi+0Hw
        /wDsl3154myvh6Wa7S+wGJMTsImGF574+Xn8a/Ks6hWq5zGGH+NJW9VqfruRSoUcklPE/A3K/o9De+An
        7O+mfDHx7qPjHQdfi1jwtqWmGKwLNukRXkRyS4G1lAjGG4PJBHGTy5tnFTHYeOFrU+WpGWvyTXqt9jry
        fJaWAxMsXQqc1OUdPm099ntuYOvfCvwV+0n4y0jx14H8Q2sVxpd9DHqlmsIQSpHNuLkABg5XOGOQwCjI
        wa6qWOxeTUJ4PGU3aSfK77XW3a3ddDlrZfg88xEMbgqivFrmVt7Pfvfs9noZ37Rfji3j/af+FOkwRxLN
        p17bSXNwFG/9/Oq7CeuAi7sf7db5PhZPKcVVltJOy/wq9/v/ACOfO8XFZxhKUVrFq7/xNK33fmcz/wAF
        EpCur+CFzx5F2cf8Cirs4QXuVvWP6nHxn/Eoekv0Pj9CWA461+hH5tYMigLH6L/sq/B3wz8L/DFrr8Ot
        2us6t4jgQx3oAjUR43eTECdx5+93JUZAxivx/PcxxGOrOi4OMab28+7/AE/M/aeH8sw2AoqvGalKot9t
        Oy/X8jN+OHjnw3+z62qLpd4Y/HPjK533Gq3WZ5LG3LbfNIUZEca5EaAZJX+LBztlmFxGbcvtF+6pLRLR
        N729X1f5GOa4rD5Pz+yl++rPWT1cVtfToui/MyPhN+0rod94q0f4aeC/Bl3qnhoD7KNQlmCyOn/LW4ki
        K4KnLMdzAnPQE7a6cfktaFGeYYusoz3tbTySd9+i0/zOXLs8oSrwy7B0XKnte+vnJq23V3ev4HpPxH8I
        S+GfhB4j8J/Cm1sLHWWjMradbzBZljlb94y5OQxXcFJIAxhegFeLgsQq2Np4nMm3Hu1pdbfLv+J7mNwz
        oYCphcrSU+yetnv8+34dD807+yudJvZ7K8tpbS6gcxywToUeNh1DA8gj0r9og41IqUHdM/DJwlTk4TVm
        ujGKcqDVkD1VnAVQWYnAAGSTStYjfRHonw+/Z+8efEmeKPS9Aube0YgPqF+hgt0HruYfNj0UE+1ePi82
        wWCTdSom+y1f9etj2sFkuOx8kqVNpd3ov+D8rkXxi+DGsfBzxfBoGoTQX7XUKT21zbZCyqzFcYPKkMCM
        H2Peqy7MaWZUHWgmrOzT6E5plVbK8QqFRp3V011Pom/8e+CfgL+zpceAG1G28Q+KdSsp0urXTpRMkc86
        kMXkX5VCAqMZ3HaOOcj4+GExea5osaouFOLVm9NF2Xn92p9vPGYLJ8peAclOpJO6Wusu720+/Qwf2PfG
        1p8ObHXNM8YafdaVoOtqksOp3trItmzAMrI7ldoDAjk8fKQeorq4iwrxkoVMJJSnDdJq/qlvocfDGLjg
        Y1KWMi4057SafL2ab21OI/aV8IfCnwzdaf8A8IBq6313M7vdW1rdC6toUwNu1+cHJIxuPA5x39TJMRmN
        dS+vQsls2rNv0/4CPHz7DZXh5R/s+d273Sd0l6/8Fnh4jE/I4Ar6jQ+SCjQDR8OeIJvC2v6dq1tFBPcW
        NwlzHHcpvjZlYMNy5GRkVlWoqvTlSk2lJW031N6FaWHqxrRSbi09dtD6A+C/xB+Mvxi+KDy6V4nvLe3a
        RZr+SRfMsbSHPQQtlQSMgKMMTyTwWHyOZ4PKctwlqtJN7L+Zv139ei/A+0yrG5zmmNvSqtLd/wAqXpt6
        dX36n0n44/aM+GUXiHUvAWu6pJsnge0vLqNW+zIXBVomkQ7lbB5IGF7kEED4vC5LmLpRxtGOzul1062f
        T8+x93i89yxVZYCvPdWb6a6NXWt/wXc+WPi5+ylqnhi1bxD4KuB4v8IyjzY5rNhLPCn+0E4dR/eX3yBX
        3eX59Try9hjF7Oqu+if37ejPzzM+HKuHj9YwT9pSfbVr7t15r7keBdK+s0PjCRPuCjQBjfeNGgHovgT9
        nrx/8RoILnSPD1wNPmG5L67IghZf7ys5G4f7oNeNis3wODbjVqLmXRav8Nvme5g8kx+OSlRpvlfV6L8d
        /lc998I/sIQWVs2o+O/E4EEEZkmt9LGFVVGSWmkHQAc4T6Gvk8RxU5v2eCpavq/8l/mfZ4Xg+MF7THVd
        Fuo/5v8AyKL+DP2ffifq+n+C/Cl7eaJqxlzDqqxyMl2QPmiJlPJIBI4AyOM5wdfrOd4GEsXiYqUesdNP
        PT8f6Zj9V4fzCpHBYSTjK+ktdfLX8NvLsei/Cr4J/BPw549hsdI1QeJfF2m/6YonvPN8hkYfNiMLHlWI
        4OSD7jNeNj8zzeth3OrHkpy00Vr39bvU93LspyWhilToz56sddXe1vSy0Og8a/E34aeK/i3B8OPEmgQa
        zqIAghvri1jmjhmcBjEHPzISAuSvfg4xXJhsDmGHwTx+HqOMd7JtNpdbbP5nZi8wy3E49ZdiaalLZNpN
        JvpfddNj53/a9+B3g/4Trot94caeyn1OWRW0x5DLGqIAS6FvmGCyjBJ68Yxz9hw7mmKzDnhiLNRtrs9e
        j6HxHE2UYPLfZzw905N+7utOq6nzaMfxDI7V9pofCEkRCA4JaQ9u1Q9wPZPhP8cfiXp2k6V8O/Bbww3E
        145t5Ft1lmG8glcuGVUB3MTtyMk54r5rH5ZgJVJ47FrRLXWy09Nb9Nz6vLc3zKFOGX4J6t6aXevrdW3e
        x9Z+Kf2oPDHwt1nS/DOuXF9rV9DGlvqOsWluvkpOqgOWAIy2TuZUHy7gMZ4r4PD5FiMfTliKKUU9Yxb1
        t0+XZvc/R8TxDhcuqQw1duTWkpJaX6/Pq0tvwPAvjh+zppmuabceO/hbeQ69okhM15p1nJ5r25PLNGBz
        jnlD8y/ThfrcrzmpSksFmS5Z7JvS/r/ns/z+MzbIqVaDx+Vy54PVpa29P1W6/L5qXOBX2jPgBjfepATR
        4KAAfNQA1o5JJEQAuzHAVRkk+gpN21Y0m3ZHceCvh9put3d+viTxVZeC4bGUQzxX8Mr3ZbnIWFRk4wQc
        kYNeZisZUpKP1ek6nNqrNW+89bCYGnWlL61WVJRdndPm+SPb/hnr3wV+E2u22r6Be+J/G3iWISRwJbWj
        KCWUqSsZCcEE/eLY64yBXzGOpZvmFN0q6hTpu17v576/ofX5fWyTLKqrYeU6tRXtZfLbT8bkvxM+OPjZ
        5Ztctfg1BodsRuk1bW9FeeYjG0M0hRQvGOueg5IpYHK8HZUZ4xyf8sZJL7rsvMM3xrbrwwKgv5pQbf32
        Vjivh58RtT+M3jzS/DWveDtC1/TtQlWC4NppSQXFpCSA0yTRgMmzluTjqO4r08bgqWW4aWIoVpRlHVXk
        2m+zT0d9jysDjqua4qGGr0IzjJ2dopNLumtVbc4T48fB66+C/jqbSHka502dftFhdMOZIicYbtuUjB/A
        8ZFeplWYwzLDqra0lo15/wCTPIzjK5ZViXRbvF6xfdf5rqeav9817Oh4Re0Hw/rPiTURa6Fpt7ql8q+Y
        IdPgeaQAEDdhASACRz7isa1WlQjzVpKK82kvxOuhRrV5ctGLk/JNv8D9Ff2X9O+IEXw41JPHs+opqk92
        5tH1KXzLiOIxIATkkj5gxAPPX1r8ezyeCeKi8Elypa22vd/oftmQQx6wkljm+ZvS+rtZfqfNHhHwx/wz
        H+1H4X0u41231iK4CQ3U8SeWIxcb4wrruO0g7H5PQg19rXrf23lFWpGDjbbr8Nnp+KPhcNQ/sHOaVKVR
        ST0b2+K6138mfRXw1l8UeGv2hfHegyeGj/wi+oztqia59mZMSPHGdnm4w4J3Db1BB7ZFfH41YatltCsq
        n7yK5eW/ZvW3T1PtcC8TQzTEUHS/dyfNzW6tLS/X06Mq+F/hn8QdT/abvvGviloh4c05LmDR1W4VsRNl
        IwEHKkoSzE4Of0uvjcFDKo4TDfHKzlp13evrsZ4fAY+ecSxmJ+CN1HXo9Fp6as+K/wBoXxQPGvxp8Xao
        snmQfbnghcHho4sRKR7EID+NfpOUUPq2BpU3va/zev6n5hnNf61mFaqtr2XotF+R5yzbiTXrnlLYQFM5
        YZQfeHrQM/RX4Cax468Mfs1S67rCXuvailpnQtIS2DSiFVCW6/Iu9gxIJLZwmD65/Ic1p4Ovmio0rRjf
        3pX0vu99NPzP2TKKmMoZU61W85W9yNtbbR21d/yPC/jB+x/8S7vxDa6gusHxgl1F519qmoXMdstlIT84
        IeUkoOuUHTjHAz9Rl/EOXxpuHJ7O2iSTd+2y39fvPlsx4dzCVVT5/aX1bbSs+u729PuPQdF+Iui/B/w3
        p3wk+Fun2vxG8X3qSPeSiRDZPMYyZS7Fgr/KmNgYAKoBbOQfIq4OrmFWWZ5jJ0qStb+a19LdtXvbfZWP
        XpYyjl1KOV5bFVqrvf8AlvbW/fRbX23dzF+Ftx+0Rrnxe0qDVo9Q0XR7OdGvoZrRINOS2BG6NAoCuSo2
        rtJOTnI5NdWOWR0sFJ07Sk1preV+76rzucuAee1cdGNW8Yp66Wjbsuj8rEn7blh8NdQtf7QsNXsIPHcE
        gSW1sB5jXSZwwm2cI69QzYJAxzkYXDMswg+ScG6L6vS3pfdPy9Q4ohl817SE0qy6LW/rbZrz9D406Otf
        oh+bnQ+APAWsfEvxXY+H9DtjcX102Mn7kSD70jnsqjkn8BkkCuTF4qlgqMq9Z2S/HyXmdmEwlXHVo0KK
        u3+Hm/I/SO7+El/4J/Z8vvBHgSdItXFi0MV3K3lNNK5zK5YfdZgX2n+H5RkAZr8bjmEMTmUcXjF7t9t7
        JbL0XXvqftMsunhcslg8E/eta+12936vW3bQ+UP2TtY8G/CPU/FnirxpqMNjrWlg2FppYG+43HPmlFHU
        kgICDgfNkgHNfeZ9TxWYRpYbCRvGWrfTyv8An9x8Bw/UwmXTq4nFytOOiXXzt+X3nceBf2y/H3j3x+2l
        6L4Ut9RsL3UIlijSGSSSytiwVi7IQD8uWLNgA57cDzMVw5gsLhvaVarTSfVavyv+X6nqYTiXHYvE+zpU
        k4tq2j0Xnb77/oeu/tRfDr4h/EWx8PWvgPVn0tIZJjfhNQe1EgYJ5e7bywGH49+lfP5JjMDg5VJYyHNe
        1tL977/I+iz3B47GRpxwU+W176tdrbb9T5L+IP7HnxH8IeFtV8VatcadqUdmvnXKW91JNclON0nzIAQo
        5PzZwCccV97hOIcDiK0cPTTV9FdJL03/AEPz/GcOY/D0Z4mq1K2rs2367fqeDp9wV9SfJjWRWJxw1AH0
        F+yNqAX4keErIqAUvrxvM7kvbAAf+OGvjOJIfuJS8l+Z99wrUXtuTzf5H0Ra6HbQ/tF+ebKJNSacyrbJ
        pzqTHt5uTc7sMf8AZAx2r4eVWX1FRu7ev4WPt1H/AGtHhv7bFvJH4Z8aqR08XWcrf7jWYCn8wa+o4bmo
        1qb/ALr/ADPnM+i/ZVV5o830X9oXwf4s+CHh/wCHXxA8K+KmtdDcNa6l4VkaMTAE7S2B7nI5BrDFZVWp
        Y14inUjd9GdODzCnVwMKNSm0l1RteEP2ffht8evAfi+98CXvjvw7qmg25maLxMzNbz/KWA54P3e3Tiue
        pmeIwNZU6nJJPsjrjl1DE026cpI9L8Hftla98LfBnhSx8eeEZ/F+janZW50/xdoke6C6gOFYTKQdskeC
        GHfbnvXlTy+OKlKrRnZ/yvQ9CGJlQjGFWN13PSPF/wC0HffDjwzcv8NfgjrGv6AButb6zt1traaVz1EW
        PMK5P3sVwUcOsTN/WK1nE7ak1RivY07pnw74v1bW9Q/aat7nV9YOoazNrli2oy2TNDBHMWTdbqoOCI87
        Mnrg1+iUMNRWUSqKnst31PgauIqyzWMHN2b27Hdft96lcad+1LcyQzSHyNPsZ1gaRjEzKdwDIDggkc8c
        1x8PYajiMvmqiW/zOviDE1qGKp+zbNH4l/H34YfHm40jV/HHg/4haXrtjZi0aPw/O6WrDOSQMY69D1xX
        m0cBicvqy9hODT7nqyx9HG0o+2jJW7GP8S/gN4TPwBi+LHgXVfEtvpkdwsNxo3irO9gX2ZXPcHp2Ir0M
        tzWtHG/VakY3fVHm5tldKWC9tTcl6nrn7DcLjQPAu4bDLrmqTIPVFgVSfzNYcR8vPUS7R/NmuQaQpK99
        X+R9BaRp2py/Ge51u7uLe2sBO1laWlmVMtxxkyXDld2ODtQHHFfKzmnhPZ9dz6OMbYnmPmD9oiZbn9o8
        uDiP+3UhLe6xWmf5193kUX/Z8l/d/wDkj4HPpJ5jTf8Ae/8AkT6P+GVo2tfss2Ftb7S8mmTQ9eDhyD9O
        K+GxbUc1lJ9z9AgnPBWj2M6/UW37LmmOYlii065tmdEGMJHcLk/lW0eVZhKPSzt9xl731OL81f7z5ONq
        9n+35NbYLNJrkso2jOQ0e4foa+txUnLh2NtdNfvPksFStnsmtNXY6ldLvfiH8P8A4++BvDn77xcviRrt
        9NRwk11b8HCj+IYBFfO0KtPDYnCYivd04p+iPp6qqVKNfD0V776lb9jr4c+Jfg/r/jTxp4v0e58HeE7b
        RJoLltTUQLcydVUKTyRz+eK9bPMVg8d7CGGd5J30PGyLC4vAwqSxPwtdS34i8T694Y/ZX/Z48Q+Fod+u
        x62ZdPtnj3CYuZNsRH+0DiuDCYelVxlejiZ2TW562KrzpYenVoxvrsdFb6l4p8c+ORqXir9le4N/q1xD
        FqOoxXjJkDC+ZgnHyjn6CsqlOjhIfusSnbZWRUKlWtK06LV99zU8I/s8+HvBf7WWq/8ACJ28154a8OaY
        NZu9OiPmmK+OfKtge5ON208jNOrnEq2Wexqv3m7fI56WUKjmPt6a923fqct4SHj34seF/iB4P8Tafe6N
        8TdM1P8A4TjwtBqKfvQvmcRKCeV+ULgf3qU44fBTp1aLvTkrSsap18WpRqRtODvEx/H2p+NPirqNnrPj
        v9lmbWdeSFLaXUIriSJnUH0zgY5PNaUoUcDB/VsVpvayMpyqY6SVSg9NN2jyj9qL4ceG/hh4h0S18O2x
        019SsvPu9I8zebR8jHuOuMH0r6nhzH18ZGp7bZbO1j5biDLqOHnTlTVpPpe599fAjT3s/EetKww1t4Z0
        i0k3HGHEBYg/mK+EzGSmoy7yk/xPs8BD2cpW2UY/kaX7Nt0svh7xBeJgwNqUqB/LCFigO48dR6N3rDNY
        pVYQWyidmBcnCbfc/P8A+J6CbXobnPFwLiYfQ3lxiv13K3eh935I/H88jy4u3l+rOPYAHGa9c8ATj1oA
        Y2cnA3/XtQAsY3nrkDuaAHk7jmpYCEHoOJD90+lIBWI2cGqQEDFMnIyfWmAkRBkOOlAE0pBoASN8IBUs
        CeJBMDkgY9aQDHOF5qkBEc5pgIXxwAd3rQA5JWztagB7YBoATfjigBr5YZxQAkTlOv3aAJGYMS6j7vAF
        ADQ+x8UATA7hmpZmyRZVQYIOaQrC+bn7ucfSgQ9XLjB7UACykvnkn+6RRYdiRZTu5G32FFgsTPPJIgQd
        FrN7iEaV2C7fvD71IC1BeJAGDD53HyH0pdQKVwwZyR3reIFeT7i0Pc0WxE2M8dfWkUCOYCXOSp+9jvVI
        CNiSuT1NMCEtIOnSgB6sdu8/eXigBcY/nQAUASJ9wUGb3FoJHrMirg9aljsAmBfjgUgsx5bcc0Gi2InI
        DHmgZExG7rQA5CNo5oAcspjJxzn0oABtA+Yc/SgBkgJ+6cL6UANCkICTlqAI9xbnNUgFXqaYDMHI+tAD
        5FBbNADRw1ACsACWzQABiwzQBKjeWhP96gBiAKuKAHdfunB70ASRnIPl8evvQBGxGTjgUAFAEifcFAAQ
        dwqWZslzh6QrDiRmgLDlPy9RRYLDXkVWwVyfXFFhDVJZskUXAlC4G6i4Di25QaLgCPthYUrgTFtyqfao
        YD3Py0gIcE844oAkQ8p+NAAOlAEi4KgD73rQBKuQvJ5oIe4vOM5oJFw1Both6527lOCvWgZ6x+zXrFt4
        X8c6l4knjEo0HRrzUooz/HII9ir+Jkx+NeBndOVfDRw8ftyivle/6H0WQ1I4fFyxMv8Al3CUvna36lb4
        V6be/Gj446Y+uzNfNeXZvtQmm+6Yo/3jg9gpC7R2GQBV4+cMsy+Soq1laPq9F/mY5bTnm2Zwdd3u7yfk
        tX8uh9G+Avhh8IvEXjfxD4zh8S33iW50u8fV7yaZWjs7di7SglvLG/BUnhiDt5FfG4vHZpRw9PCOmoKS
        5V1k9Eu+n3H3eCy/J6+Jq42NV1HB8z6RWrfbX7zsPDPxd+H+qWniz4naN4e1a4uLQR2uo30drmeSPC/d
        BkxsVVRmxjAAJzXm18ux0JUsuq1IpO7Svpf7t3sj1cPmeX1I1s0o0pNqyk7ataba7LRvbudR8O/iD4G1
        LwNrfjfRbUaNpDTz3WpXEtr5UjyIN0kjhclzg9sk5x14rhxmDxkMRDB1nzSslFXurPZLsehgcdgamFqY
        6guWF25O1ndbt23PNbGP9mrx7eL5S6JBcSMCEczacC2RwAfLB57Dr+Ne3J8QYSOvNb5S/wAzwILhnGy0
        5U36x/yPm79pv4d2Hwy+Js1jo6rHo17axX1lEshk2I2VI3Ekkb0cjnoRX2mSY2pjsIp1fiTaf9ejPguI
        MBTy/GuFH4JJSXXR6fmmeRk5XNe+fNH154Y1dv2af2XTdzH7P4t8Vu81nFjEkYZAquf9xMP7NIAetfnl
        en/bWb8q1p0t/wCvN6eiP0/D1f7AyTnelWrqu6utH8lr6ux6x4S8NaZrX7K2i6Z4v1Waw0m40qGe7vTc
        CJ0iLiVRvYEAEbV6cg4FeBiK9SnnE6mFjeSk0la+u2y+8+kw2HpVcjp0sZO0HFNu9tL33f3HLfBr4nfB
        T4feIV8LeDry+M+sTpE99cCUwySjIQEuRtJLEAqoBJGT0rvzLA5vi6X1nFJWgtla9uu36s8/KswyXBVf
        quDk7za1d7N9N/0Rk/tBftW+MvhN4/vPDtjoGlpbpHHNb3d6JJTPGy/fAVlAwwZe/KmtspyHC4/DKvOo
        79UrKz+5mOc8RYzLsVLDwpxto03d3T66NddD5D+JXxE1L4m+KbnxBq0NpDqFwqLL9jiMaNtUKCQSecAD
        Oe1foeCwtPA0FQpN2XfU/NsdjamPrvEVUlJ9lbYxtY0PUPDk9vFqNs1rLPbQ3catg7opUDxtx6qwPqOh
        5rppVoVk3Td7Nr5p2ZzVaNSg1GorNpP5NXX4GXiS4mAVS5c4VVGST6CtG7asySvoj7B/Z+8E+IvgF8M/
        FvxJ155tMP8AZ7jT9Cu3ZElkOPLkmjyMEttVRw2C3TIr89zbFUM2xVLAUdddZLouqT9NX02P0nJsLiMn
        wdbMa/u+7pF9X0bXrouu5xvxq/al074ufDjw4jaS+m+MtL1aO8LoA9uEVGyyMTuAZih2H+71OBn0ctyO
        eX4qo+e9KUWvPdb+ivqefmef08ywlP3OWrGSflont6u2n4nQeFvEeuaL4H8T/EPWmQ+O/iVImi6Daqoj
        JQ4jMwXsoyuCf7idd4NclelRqYilgaX8HD+9N/jb1/zfY7cPWrUsPVx9b+NiPdgvwv6dvRdyr8I/ilon
        7Lg8b/D/AMX6dJNrDTEvqWlMJ4pswjZGQ20gDcSDjq5BAxVZhgqueexxuFl7vZ6Na6vr/SIy/H0ci9vg
        cVG8u8dU9NF0/pnyiOlfeXPgS/rOi3nh26hgvYTDNcW0F2gP8UU0SyxsPqrr/KsqdaFVOUHs2vmnZ/ij
        WrSnRajNWuk/k1dfgzv/ANnDUF8P/Fez1lgHGkWGo6lsJ+8YrKZwPzAryc4j7XBul/M4r75JHr5LP2WN
        Vb+RSl90Wy74C0O68XaR8QviL4ika8h06ymzPcc/aL+6zFH9SpkL8dCE7GoxVaOHnh8DQ05mtF0jHV/f
        a33l4SlLEQxGPru6inq+spaL7r3+49O+B/iaX4y3Hwl8Dw6ZMv8Awh19Lqt/fkgxGJH3xDA6ZJVDnuR6
        nHiZnRWXLFYxy/ipRS63as/8z3cqrvMnhMGo/wAFuTfSyd1/kb3gD4s3Hw6+JfxE+IWt+FNd1Lw/r1zJ
        HZ6lpdus0caRSuoWRiwC8Ko5Ofl6VyYvARxmFw+Bo1YqcErpu26Wx04PMZYLF4jH1qUpQm3ZxV0rN766
        Hz4vxa1SD4Z6z4Kt4IY9J1XVf7UnlwfNJwuI89NuURvqK+v+oU3ioYuT96MeVdvX8WfF/wBpVVhJ4OK9
        2UuZ9+mnpoj6Pnb7T/wTrjkbjZggD21XbXxyduJn/X/Ls+2evCqf9fxD40Y7sN/D6V+jXPzIeeT8vAou
        B9l+F9D1jX/2EINJ0KwuNT1PU7wxRwWyFmx9vySfQYTknAA61+cV61KjxC6taVoxW7/wf8E/T8PRq1uG
        lSoxcpSdrL/H/wAA9O8E+MPCn7O1n4G+Feragr6xeQs1zPvBhgmclvnJPyq7llXjoATjOa8PFYfE5xKv
        mNOPup6d2l29Fqz3sLicLksaGWVZe81q+ib119XovxPPPhX4U8OfDT4w/FT4iW96tt4E0MNbW72rfupZ
        pFR5Yk5w2xvkC/3mXHSvXx2Ir43BYbAyV6s9Xfeyuk32utfS542X4fD4HHYvHxlajDRW2bdm0u9npbu0
        dP8AGTwz4X+LHhPwp8XtFu0srrT57W4WacBPtEQnUGBxz+8V8gYzzleQQRxZbXxGX1quV1ldSTXo7bry
        a3+878yoYbMaFLNaLs4uL16q+z809vuOB/4KJWzLfeBZ/wCBo71PxBhP/s1erwhL3a8f8P6nlcZR96hL
        /F+h8dfPy4P3elfolz83EdSoXPXrRcD7l/Zm8J/C34a+BNJ8f6t4msLjWbmFts+oTrGLF/8AlpDDETne
        MkEgEnORgNz+YZ1iMxxuIngqVNqKeyW/Zt9v6eqP1PI8PluBw0MdVqpya3b27pLv/S0ZY8X6xo/7RL+I
        NM+HHgpNXn1YR22oeNdUjMFvbqhXb5ZYF2ICr8qhexINThqdTKFTqY+tyqN2qa1bv3tp83f1KxNSlnLq
        U8BQ5nKylUeiVrbX1+St6HQ2XgSb9mjwaNK+H3hW+8X+NtTjxNqr2+2BSP4pHJCqoP3Yg2T1J7nkli1n
        Vf2mOqqnSjtG+vyW7fd29DrjhHkWH9lgKTqVpbytp83sl2V/U8X079mL463PiWTxg+owab4lkkM7XEmp
        jzyx6jMYZcY4252446V9LPPMmjSWFUW6e1uXT8bP57ny8MhzuVZ4tyUam9+bX8Lr5bH03ffCTRfiT4N0
        eL4o6PpUniyWEQz3do4ilaUZx5ci4J4AO3lc54xXxEcwq4KvN5dN+zT0T1VvNfrufdzy2jjsPBZlCPtW
        rNrR38n+mx84/F/9hfUPDlhdav4L1RtWtIEaWTTr/alwqDk7HGFfjsQp44yeK+yy7imnWkqWLjyt9Vt8
        1uvxPicy4TnQi6uDlzJdHv8AJ7P8Dz79mr4+6d8DX8RTajop1aW8gjNo0IRZFlQkbDIeVRgxyQDyo4Oa
        9bOsqnmipqnPls3f0fl3X9M8bI84p5S6jqQ5m0rbXuul+id/+AfVv7NX7SV/8dNW8QWd/o1vpf2COOaF
        raRnyrEgqxPfIGCMd+OK+CzrJoZXCnKE3Lmunc/QsizyebTqQnBR5bNWPin46+O7r4h/E/xBrsssk9p9
        qe1syfux26MwiUdhkAtj1LGv0zKsNHBYSnRSs7Xfq9z8szfFyx2MqVm7q9l6Lb/M+w9K8FeH7b4XS6z8
        CbLw7qHiBUjD3V2vn3B2pyo3k+VKeDtbCnnI5Br87qYqvLFqlnMpKGui0W/luvTU/S6eFoRwTrZJGDnp
        q9Xt57PyehofAHx/4uPwj8U+I/idLKwsLi4wt7arBJ5UcY8xSoVQRv3KARnII9BWGbYTC/XaVDL18SWz
        urt6dX01NsnxmL+o1cRmT+FvdWdktei66HwB4h1d/EOv3+pvb21obyd5/s1nGI4YtxJ2oo6KOgr9Xo0/
        Y0407t2Vrvd+p+OV6vtqsqlkru9lol6FOUMnzqfvVsYEYdlGCeaAPSvg/wDADxT8ZtUj/s60ez0UPifV
        7hCIYwOoX/no3+yvtkgc15GYZvh8ug+d3l0it/8AgLzPeyzJsVmc17NWh1k9v+C/JfOx9Yar4J8X+FPC
        jfDz4ReHn0mzGU1HxXqki27TSEYZox99icY8wLgDhexr4KnisLiK317NKnM/swWtl59Plf1P0SphcXh6
        H9n5TT5V9qctLvrbq/W2nTozzQ/sMHQNEuNW8W+P7LSbW3TzLmSGzaSNB3/eO6dyP4ec9K9z/Wr2tRUs
        NQcm9tbfgk/zPBfCPsabq4rEKKW+l/xbX5HW/Bn4LXuhRHxB8Kvivb6zaJLsuNOu7RltJ24JWUByUOCM
        HZu54NedmWZwrP2GZYVxfRp6r001++x6WV5VOivb5Xi1JX1TWj9ddPuuel/FH9lfwb8VA1/cWp0DX5Bu
        kvdLI2u/fehAD8/xYVj614eBz3FYH3Ivmh2f6dvxR7uYcPYPMP3klyTfWP6rr66M+XPiD+xJ468JxyXG
        jPB4psU5xZ/urjHqYmPP0VmNfcYTiXB4i0at4Pz1X3/5pHwGN4Vx2GvKjaovLR/c/wBGzwO8tJrG6mtZ
        4ZYLqFzHJFKpV0YHBVgeQQeMGvq4yU0pRd0z42UZQk4yVmj0zwf8UviZr+hab8OvD+q6hLFJLsggsyVm
        CnjYZR8yxDk4yAATngceLiMDl9GpLHV4q/W+3rbv/W572GzDMq1KOX4ebtfRLf0vvb8PkfYt58OPH/gf
        4WeE/CvgnVbSO/tp/tOrazqU52DDeY64IYlGZiOB91MH7xr87jjMFisZVxOLi7NWjFL5L5pfi/I/TpYH
        H4TBUcLgprmTvKTfzffRv8F5nnv7Unwp+HWqfDHVPHegNp1tqlpNHE02jzI1vcyGVUeNlU7d43FsjDcc
        5r1sjx+Ohi44OvdxafxLVK109en4djxeIMuy+pg547D2Uk18LVm7pNaaX/Hucv8As72qfA34MeJ/irqs
        C/br6P7Fo0EvBlG7A99rSAE/7MRNd2byeaY6nltN6R1l/XkvxZ5+SRWU5fVzSqtZaRXf/h3+Cuch+yPo
        N/8AEH4+Ra7fNJdCxE2qXlxJ1eVsquT6l33f8BNejxBWhhMudGGnNaKXl/wyPM4bozxuZqvPXlvJvz6f
        i7/IpftiePh41+Ml7a28m+x0SMadHg8GRSTKfrvJX/gArTh3CfVsDGUlrPX5dPw1+ZnxNjPrWYSjF+7D
        3fn1/HT5HhytsJI/ir6c+SOy+GWkeDNW1N7fxj4hvvD0Bx5Vza2X2iM9chyDuXtjCkdc4rzsbUxdKHNh
        aam+zdvu6fij1MDSwdWfLjKjgu6V/v6/gz3u/wDiF8LPgl4I1OD4X3lzrnjbUYfIXWZIXLwqSNx3Mqqu
        ACQEHUKWzivlY4TMczxEZZjFRpRd+W+/4v8AH5H188bleU4aUcsk5VpK3NbVfekl8lva5yvws/aK8KeH
        /hdJ4S8b+EpPFRju5bm3ZxG4/eckln+ZW3FvmGTg1247J8TVxaxOEq8miT36enTyODL87wtHBPCY2j7T
        VtbdfXVO/U5z4eeOpvhd8X9M8UW+m3/hTwrf3g3WknmyRmyc/Mu4gGUKp3DgnIGOa7sZhVjsFLDSkp1I
        rfRe8vyvscGCxksvx8cVGDp0pPbVrlf523PpXxof2c/ieZLi91bSLK+lBY3tnI1nMT3LDADN/vKTXxeG
        /t3A2jCEmuz1X/A+TPusV/q7mF5TnFSfVe6/8n80z5J+LfhLwl4S1yKHwj4tTxVYyqzMfIZHt8EYVmwF
        fPqvocgcZ/QMvxGJxFNvFUuRrz3/AFXzPzfMsNhMNUSwlb2kX5bfo/kcTGrAFlPFeoeQekfs+ePfDHw3
        +IcOv+KtNutRht4W+y/ZURzDOSMSFWZQcDdjngkEDIFeLm+FxGNwzo4eSTe9+q7HvZLjMNgcWq+Ki5JL
        S1tH31sc98QtdtPFnxD1/VNJSZbPVdSmuYFmUBwJJC3IBOOW6V2YSnPD4WnTqbxik/kjhxtWGKxdSrS2
        lJtX82fcfxl0rxj4G8PaH4f+EHhqC1lvQ8V3f2NtEjQKgQLljhQW3MSzc/Kcc81+X5bUwuKqzr5pUuls
        m3re/wCXZH63mlPGYSlTw+UUknLdpLS1vlr3Z0elapqPwO+Bsmo+OdYk1/U7CB5riWSQs0sjsdkCs3Lc
        sqAn68DgcVSEM0zD2eDhyxk7LyS3f6ndTqVMoy32mOnzyirvzb2V/wAD4kh/ai+ImnaleXWlaraaJDdS
        FzaWWmWyxIM5AAMZPGepJJ7k5r9MeR4GcYxqxcrdXKV/zPylcQZhCcpUpqKfRRjb8ji/iH8UfFHxO1G3
        vPEurSapLAhjh3RpGsak5OFRVAzgZOMnAr0cJgcPgYuOHhyp+r/M8zGZhicwkp4mfM1tsvyscmRt4ruP
        PO2+DPxSuvg94+tPEltai/WKOSGa0MvliZHUjBbBxhtrdOqivOzHBRzHDPDydtnfe1v6setleYSyzErE
        RV7XTW17/wBXPtr4Z/GvxT8XvgX458QQ6bFb69Z/a7bToNLRyxcW6vHgEsWcM/brxgV+a47LMNl2YUKD
        leD5XK9u9n8rI/VMBmuJzLLa+IUbTXMoqN/5U13u7s+Hte+F/jXSvEunadqmmXX/AAkWrN5sFmZllvJC
        T950DF1JOTlwCcE9jX6dSx+EqUpTpyXJHd7L5PZ/I/Ka2AxlOtGnVi/aT2V7y+a3XzPuL4DaV8bbnxOm
        q/ETUYrfREsTBHpeYjK8ny7ZGEYODgMSS2cnGB2/MM1qZQqXs8DG873vra3bX/I/V8op5zKt7XMJWha1
        tL376f5nEfEvwP4j+HOseKfE6/HpdHupmuLm30e8bO5W3MsKxtKeQCFXbGcdQBivTwWKoYyFLDvA8yVk
        5Ly63t992eZjsLiMFOrifr/K3dqL89bWbforI+HWYsxJJJPJJ71+m3Py0jYfMadwO6+CHiDwx4a+JWk3
        njDS4dV8P7jHcRzIZFiyMLLsH3tpwSpByM8E4ry8zp4ithZwwsuWfTz8r9Lnq5XWw9DFwni480Ovl526
        2PtW2/bJ0fxH430zwx4I8L6l4jjmuobaS+CmCKGNnCtIECs21VOfmCYx6CvzaXDtWjQliMXVULJu27b7
        Xuld+Vz9NjxJSrYiOHwdJzu0r7JLvazdl52Lv7T3wi+IvxjmsNI8NaxYab4ZWDfeQXlw8Qnm3kgMEjYs
        AApAPGeeorPJMwwOXKVXEQbqX0sk7L5tGue5dj8ycaWHmlTtqm2rv5Jng/7Hnw11Pwz+0vrmn6kkLTeH
        LO4SaW3fzIxKzLGAre4Zzg4PByAQRX0/EONhXyuE6e1Rq197bnyvDmCqUM1nCpvTTvba+xxH7WvhTxL4
        R+M/iC8v5LgWGtym6tLlXPlzRYA2fVPulewx2Ir1MgxFDEYGnCG8NGuz7/Pc8riGhiMNj6kp3tPVPuu3
        y2PDy7rxmvprny4oJPXrRcD1X4TftA6j8FvDesWnh/RrD+3dSkG7W7oGSSKIAYjVOnBy2TkEnkHArwcw
        yqnmVWEq83yR+yur73Pey/N6mWUpxoQXPL7T3S7W/E+j/wBi/wCJWrar4a+JuteIdRuNUltGi1GSa5kL
        E/upd2PQYiUYHAAGK+P4jwdKnVw1KhFRTutPVf5n2nDOOq1KWJrV5OTVnr6P/I8Y+Evj34N6P4SvL74g
        eGbjXPFy30kieR5jC5jfDAsDIsYw24HPOMYB5r6PMMNmk6yhgqvLTt5aNfJs+Zy/FZTCg546k5Vbvvqn
        80j0zwz+3BZW+t6RoHhj4f6foWjz3cVvtE4TarOFLBERVU4Pv0rxa3DUpU51sRXcpJN7fq2z3KHFEFUh
        Qw+HUYtpb9/JJHaftg/tB+Lfg5rfh/T/AAzLa26XtrLNNJPbiVshgq4zwMc9u9ebw/lWFzCnUniE3Zq2
        tj1OIs3xWXVKcMO0rpt6XPm+6/bR+KF/Z3NpdavaTwXETwyI2nwgFWUg9FHY19hHh3LoyUowaa13Z8XL
        iXMpxcZTTT02R4ipG3jgV9Pc+bWwx/vGi4z0r4B+I08M+P8ARdQkfYlnqdrM5z0jZjE5/KSvns7p+1ws
        kux9NkFVU8Wmz7L+K8C6H8X9LvobH+076by5ka2tZ7i+giUgFYsERIp7lvfrX5jhXF4aUJP8Vb/M/UK8
        WsRGZyP7VvgK48Ux+MdMtbVZbrXdFg1WwimOA1zZvl0+vlvn8K9LJcUsPUpyk/di7P0f/BPPzXD+3hOP
        V6r1R8m+GvjF8TfAHh+x0a1+IOkaLp1mmyC0W0imMa9cZIyeSa+wr5ThcXN1pUpXl1vofL08xxGFgqcZ
        aRDxN8dPiH450S40S9+LcD6fcrsmt7e3S1Eq91LKAcGpo5Ng8NLnlSbLqZpiq8eVVUjV+Cfxi+JnwB0+
        az0ix07xx4QdzMdJMgYQt3aI9Vz3HSscwyvBY2XtXJwkaZdmGIwcXTl76O68Zf8ABQHx38RdAudE8JaJ
        aeD9ZKlJUlmMl2yYwRBkABvrz6V52H4ahRmqleXNHsd+Iz+VaLp0FZ9z5cjV/DGsWVxcSyXHiOCdbuDT
        rX940UobcGlbu27kivsZQjUoPDrSDPkeapCuqz1kdf46n+IfxU8QN4o8Y3VlY38sccf2i4CwnYhyg2j0
        rDDUcPgaXsKSunudGIq18bVVWs7OOx2yftK/EyzjSF/ivpkYRQoVNMiYAAY67a8f+w8JJuTpPU9SOcYi
        EeVTRzfjrx78Qfi3ZQW2r/EKz8SWVs3mxacwWCIsOhKAAE+lduCwOEwcueNO0v0OTFYrF4xKlKd0z7J/
        Zf8ACLeCYfD9rqEMdq/hjw613fhT8sd3eP5hXPqI1X86+Fzeu8XOc19uVl6I+vyygqDiukVf7zsPhl8P
        77SviM+v6np9jAbuF7tbm1vJkkYOx2iW3clehPzA8GvPxWKU6Co6326fmejh8O41nO+jPjL4yeMP7b8Y
        yatG2fO1W81GM99jSqiHPptgXFfp+T0XSw/I+yX4f8E/LM9r+0xKt0b/AD/4B9h/si6muv8Awh1TRFdR
        Npl/c24zyNkn7yM49MMK/OM9p+yxsZ97H6Zk9T22EsaXgPTYPGfwu8beC4wv2iEzQ+bklXkYEhgO2GHS
        ssTL2OJpV+jsaUYudCdHqj4P/astryHxj4R8dWs1xp0uvaZHFPcwN5bwX1uPJnXI6HIz+NfoOTOFXDVM
        HWV7PbyeqPic1U6NWGJouztZ+vU8h2PZauNTi8USW2rK286hDcss5J7lxyfxr3JUaU6UaHslyo8aFfE0
        ajrU6mrNHWL7xB47ijg1bxxea/ChyltqN+zpn/dJwfxrmo4LCYWUpRpWvsdNTFYzEQ5ZVCtqdj4y0uxs
        0nu9Tk02wcS2awTs8Nq46NGB9wj1FdFsHKpKTiry02IcsbGnFQbtErD4q+N3B/4rvxGx7j+0pP8AGs1l
        OCiv3dJOQ/7Wxt9ZWQ/wrqXjWR7p/D2ra5bG5k866uLW6dPOk/vO+fmNFfB4CcFGpFJoKOJx926cmat5
        c+LrfUIdR1Lxrew6rDGYo7t9RZriOM8lA+c4J7VlHC4P2Tpwp6PfQ2liMYqinKpqvMY3jLxLJw3xL1l/
        Y6nJ/jS/szBvVUtiP7Sx1/fqEvw58G3HxD+MXh3QTfSarPqF5G93eTSGU+Up3OSx7BQa0xM6eCwk5KPL
        pp5mdBVcZioyqy5tfuP0y8BaiLb4beOfGIjYLrl3PJZqqks1tGBBBgdeVXIHvX5PiIt4ilQWvLv67s/S
        qMfZ0Jylpd/gWPBN9/wrv9n++1e8mnYw2Vzfs11gSDIIUEDgHJ6UsS/rWPVNdWkaUm6OFm/I/PTxhPJ9
        utLeZiXtbSKN1J6MQZGH/fTmv2HAxVOjZf10PxfNKvtcVJ32MMxhkyOlehdHmLYhxt6EYouihN275TRc
        Azs4z0ouA9JcGi4BNN1b+7wKLgQ5/XmqQCHI5J+WmAqAZLL3qGwGLL8/ofei6AkMxQgjkmi4EkjgNgD5
        vWi4CYMn3uq1S2ARcls4pgKzkE+goANxPfH1oAerIFG7rQA1iCflPFADo5NoIoM3uNJLHNAhpds4Xgjr
        QAoO7px7UALv2kAsQfQVLAs5zznNK4DllKjFK4DshuSxB9KdwHRybTuDFinGDRcCRsk5wFzzii6Acspi
        HHes3uZvcA2x80iR7OXGQN5PUHtQBAUB/iz7mgBr4AxVp6Gi2IW+7VXKE42DLke1FwIu+Ac0XAa/SqRo
        thiuQKYyRW+UE8UGb3Gnk8HigQ5W2DPWgBrOZDu9aAHKeOSKls0WwK25yOy0rjJRNuGaLmb3HEIyZYc0
        XERtGpXjgelFzRbEO3bxxRdDHI5U4IAH96i4D2kOe7D1NF0Amd3NFwGyYIxyjeo70XAhII+8ADRcB6nj
        gii6AHcgDuBRdANc7mJouAlFwCi4Dl5icDnmi4DifQjpRdAGfcUXRm9wGT3ouhDRJhyOtUgJgA4yTzTA
        CMcVLAfG5U4xSuA9t5OQcA0XATcW+U/w96LgJ5m/k8UXAlQjaOaLgO8zbx/Wi4DxkDk80WMQz7iiwBvI
        96WgC5JGaNAJcHyxUPcBoBA5+76UgJYpuCoGFoAY46d6AJB0oAkQ/KKAFoIYnmbTzzGPvD1oJDzGHUUG
        q2J4juQGgD0r4EaeniTxdf8AhlrmOym1/TLjTreebOxZiFkTdjnBaMD8ehrxs1m6NCOItdQkpNeWz/M9
        vJ6ar4iWGvZ1IuKfnuvyse6f8K1h/ZX+DXijWdXvba68Za5A2l2ptiSsKycFYyQCSBl2OMfIo9z8r9de
        fY6lSpRapQfM79bd/wAl6n1/9nx4cy6tWrSTrVFyq3S/b836L5u8P/FP4HWXwsHgB73VbPTrpVN9eQ2s
        iSTygqWdmUEnJUDGCMADGKVbAZxLGfXlGLktldWS7DoZjkUcD/Z7lJRe7s7t99P6toek+EtV+Eur/DK5
        8A+EPGNpplrfQvb7jOI7uRpOHO2YAszDgjHTgYwMeLiIZnTxaxuKouTi77XWm22yR72GqZRVwTy/B11F
        STW9pO+/xWu2aXiH4F3Omfs83/w88KXcbXcqYF1fNs83MwkfcVBwSoKjj0z61jSzWNTM447ErTsumllv
        950VsnlSymWXYSWr6vrrd7fcfCHxB+GfiP4UapFYeJrD7HNMpkgdZFkSVQcEqykj8Oo9K/VcHjsPj4Oe
        HldLfyPxvHZdicumqeJjZvbqmcnJJJMcu5Y4wMntXeede5738B/g7osdraePfiLqFpo/hSFvMs7S8cB9
        QdT1CdWQEdACWx0x1+TzXMarbwWAi5VHu19n59/yPs8myuiksfmMlGktk/tW8u35+hk/tRfG3TfjJ4ss
        P7Ft5Y9I0qF4YZ5htacsQWYL/CvygAHn1x0G+RZZUy6jL2r96Wr8jn4izalmlePsF7kFZN9b9bdD6J+P
        fwb8XfEXSPAvhjQ5bey8Kadaq1/dTXASNGRFVSV+821A2MDHzHJHBr4/KcxwuDnXxFZN1JPRW73/AF3P
        uc5yvF46nh8LQaVKK95t6aJJab6K9vxMb4ieEvhD8cNJTTvCXifR9K8V6PGttZ3Ab7P54jG1Y23BfMXg
        YdN23qMjg9GDxGZ5ZP2mJpylTnq1va/XrZ+Ttc58bhspzamqeEqxjUhonte3TpdeavY5yCbTv2svAn/C
        Natc21h8VPDivHbXLSAx36rwx3DO4Nt+bGcHDD5SRXY1PIMR9YppvD1N1/L/AF077PU4U6fEeG+rVWli
        aez/AJrfnfr2eq0PmSX4ceI7fx9Z+DtQ02ex1m5uo7VbeZCCC7BQw7Fec7hxjnNfbLGYd4Z4qErxSbv6
        fqfC/Ua8cTHCVItTbSs/P9PM9T/bY0mDRfjDa2lqojto9GtUjX+6q70A/JRXhcM1HVwTlLfmf6M+h4pp
        xpY9Rjtyx/C6PIvAnj3Wfht4gj1rQpoYNQjRkWSe3jmCg4zgOpweOowevOCa+hxWDpYyn7Ksm4+rX5Hz
        eExlbA1fbUHaXmk/zNL4jfGPxt8W2iXxHrs19b253paoixQqfXYgAJ9zk+9YYPLMLgL/AFeFm+u7+9nT
        jczxmYW+s1LpdNl9yPYP2e/2SL7xZJb+J/HEZ0bwrCBOtrcHy5rtRyN2f9XEe7HBI6ddw+ezfiCFBPD4
        P3qj0utUv83/AE+x9Pk3Ds8RbEYxctNa2ejf+S/pdzn/AIh/FC38b/tQ6DeQ3cX/AAjWjazZ2WnCHAgj
        top0BZAOMMQzZ9COwFdWEwLwuUzg1784yb73ae/5HJjMdHFZvCaf7uEoqPaya2/M5T9qLw/quh/HLxY+
        pWk0CXt9Jc20siELNE2CpU9CACAcdCMHmu3JKtOrgKSpu9kk/JnDntGpSzCq6itdtrzRynw/+GfiT4la
        xa6boGlXF68zhGnWM+TCM8s79FA9/wCdehi8bQwVN1K0krfe/RHn4TA4jHVFToRbv9y9We3ftw+ArfwT
        rfgQWo+RNCj00yAY8z7MQoJ99rqPwFfM8M4qWJp13L+Zy/8AAv8Ahj6jijCRwtSgo/yKP/gP/Dni/wAH
        PFdh4O+JGi6prEfm6OXe1vkIJzbTRtDNwOT8kjdK+izGhPEYWdOl8W69U7r8UfN5dXhhsVCpVXu7P0as
        /wAGe9ftGeNPAWn+HfDnwt8BX9naeGFuBqGp6laM11HuI+UFlLNI3JY89oxkYIHzGT4bGzq1MxxsW6lr
        RT0/ysv+Cz6nOcVgoUqeW4KSVO95Na/53fV/JFDT/wBpTwt8GfBcnh34V6TcS6hdLm88SaxGqyyyYxuW
        IE8DJ2gkBe4Ykk6yybEZlXVfMprlW0Y7W9fz790YxzvD5Zh3h8sg+Z7zlu36fl27M4L4IfH3xF8HtZlN
        gV1PTL9iLnS7uXbFK5GA+4/cbOMt3HB7Y9fM8poZjTXP7so7Nbry8zxcrzjEZZVfJ70Zbp7N9/J/0zkd
        d8A+LNGunbUPDmp2DzOcCSxkRSTz8vGCORjHqK76WKw1Rfu6ifzR5tXBYqm/3lJr5M+v/F3he98G/sBH
        StQgktr1Le3mkhlGHQy6ikuGB5BAcZHavzzD14YjiP2kHdXa+6DX6H6RiaE8Nwx7KorOyf3zT/U+Hea/
        T9D8oE59RRoB9L+MdfvdH/Yp+GkFlcy2klxq1yzyQuUYhJ7ogZHPUqfwFfF4elCpn2Jc1e0V+KifdYmt
        Olw9hYwdryf4OR81Xby3dy9zPK800h3NJIxZmPqSetfZpRirJWR8PKTk7yd2dB4R8LeJfHxbRdCSTUWj
        /fjThdIhY4OWSNmG8467QSK5MRXw2E/e1tOl7fm0tPmduGw2Jxn7mhrbW1/yTevyO20r4YfFxZNJ8Nze
        HfFKaNHfpOtq1rP9kjkLAGQ8bB357c+tebUx2WWliFUhzWte6vbt3PYpYDNFyYeVOfLdO1na/fse8f8A
        BRJGNh4EfHyiW9BPuRBj+Rr5XhD4q/8A27+p9ZxkvdoP/F+h8VD/AFlfpJ+ZCyEsQtAH1h8Cv2StCvfC
        dn498fa3bDw88Au0soZvLjEfrPNxt9Ci85/izkV8Hmmf1oVngsFB897Xt18l+r+4/QMp4eozoRx2OmuS
        17X0t5v9F9/QwP2g/wBpy31y0t/B/wAOQ/h/wlYnBnsgbY3RGcBVXBWPknB5Y8kDFdWUZJKlJ4rH+9Ul
        31t/wfyOTOM8jVisJl/uU49Vpf8AyX5n0B4N+KWv+Kv2RJde8OXDT+LNMsDayOVE0olhIDsQc7nMXzjO
        eWHBr5PE4GhQzpUa6tTk79lZ/pfQ+tw2Pr4jI3Xw7vVjG3d3W/ztqea/sZN8RPFPxG1HxJreo6xdaELR
        4p5tRmkaOeUsuxEDHBK8nj7o443c+1xIsDh8LGhSjFTvpa10ut7d/wAfkeFwx/aGIxcsRWlJws73bs30
        tft+HzOD/bY+Jc3jH4ptoNu5Gm+HlNuo/vzsAZW/D5U/4AfWvW4ZwMcPg/bS+Kpr8un+fzPI4pxzxWN9
        gvhp6fN7/wCXyPBW1nUHt/Ie+uZID0iaZin5Zx2H5V9SqdNPmUVc+RdSo1yuTt6lLbtjce9a6GJ9i/8A
        BPFoXu/HiOR5/l2O0dyuZ9367a/O+L72oW2979D9L4LtzYhPf3f/AG45D9qaHSZfE+kfDX4faJm10QPN
        c2ulwtK8l1JgYbGWdlUAZOSC5HavRyF1PYzx+OnrPRNu2i/BXf5XPN4gVL20MuwFPSGrUVf3n+LaX52O
        m/Ze+AXxJ8HeKrbxTf3P/CHaNGubu2vCDJdwjko0WcKOvzOQV6gGuHPM2y/E0XhoL2kujWyfe/X0W53Z
        Bk+Y4WusVN+zh1T3a7NdPV7bnqPj/wCKvwv+Pthqfw6HjGXSrmadEgvFQrBcSqcqFc/K67sDBK7iBtPQ
        14OFwGYZTKOO9jzJLVdUvzTt626nv4zMctziM8v9tytvR9G157NX9L9D5M+KH7M/jz4X3UhuNMl1bShk
        pqemI0sW3/bAG6M/7wA9Ca+9wOdYPHL3Zcsuz0fy7/I/O8fkWNy+T5oc0e61Xz7fM8qDleDya90+dNzw
        Z4tk8Ga9FqqabpmrmNSBa6vbC4gPTkoe4xwa5cTQWJpum5OPnF2Z14XEPC1VVUIy8pK6+49c8Tftl+P/
        ABNo0Om2yaX4egikjkWTRoJIXwjBlTLSNhcgZAxkcHgkV4eH4cwNGbqSvNu/xNPf5LU+jxHFGPr01Tjy
        wSt8Ka2+b0PsnxPqFh8T/hFpGqyeL5vBGlajFBd3GoW1ylu4RkJaHzXOE+Y4J/2SO5r85oQngcbOmqPt
        JRukmm+u9lv/AME/T8ROnj8DCq63soys200tLbXe3/AIPiBd+DPBfwAk/to3HinwfDZwRLi486W9Qsgi
        IlVl3ZO07gQMDIqsJHF4nMl7K0Krb6WS3vpr9xGMlg8Llb9tepSSS3u5bW108tTzP9iU2Wl/Dzxt4gSJ
        7HSW1SR44pHL+VDFEHxuP3sB8E98V7nE/NUxVGhe8uVfNt2/Q8HhTkp4WviErR5n8klf9T5B1b4p+KNS
        8Qanq8WvapaT3lzJcEW95JGELsWwMEYAz+lffwwOHhTjScE0klql0PzWpmGJnVlVVRptt6N9S8fj18RU
        iWJfG+vFcbcm/kLfnnP41l/ZWBvf2MfuRr/a+YWt7eX/AIEzjb68utT1B7u5nlubudjJLPM5d5GJyWZj
        yST3NelGMYRUYqyR5c5yqSc5u7fVnuv7MP7QmjfBS21u21rRDdvdjzYb6zRTcFgOIXLEfuyQCMHgknBz
        x8tneUVsycJUp2tunt6+v5n12QZ1RypVI1qd76prf0fl+Ry/xd/aO8ZfF24lhurw6XobE7NJsnKxbe3m
        HrIen3uM9AK7svybC5ek4rmn/M9/l2PPzLPMXmTanLlh/Ktvn3+f3I6v9nT9nHV/ilGmpa/Ncab4Dim8
        91aQp9tdQQdg6AAZBk7DIBznHBnGc0sC/Z0UpVnp6ev+X3no5JkdXMEqlduNFO/+K3b9X93l7F8crTQv
        j1ouneAfhz4i0h77w/MHOleaYopY1jKKIXxtfYCeFJwCefX53K5VsqqSxuPpytNb7u976rdXPps2jQzi
        nHAZdUjem/h2TVraPZ28jU8K+FY/2P8A4Ca/rV/JBd+J7rDO0QynnH5IIgSBuVCxYnvl/asK+IfEOY06
        UNKa/Ldv1e33HTh8MuGssqVp2dR/nsl6Lf7z4OuLia8uZbm4d5biVzI80hzuYnJJ9ya/U4xUUorZH5BK
        Tk3KT1ZGTzyQfpxVEnsf7NfwAk+NPiiSa9eS38OaeVe9mThpSfuwofU4OT2HuRXzudZqstpJQ1nLby82
        fT5Fk7zWs3PSnHfz8l/Wh6z4HvtDsv2yL/w9pmj6fpuiizuNChhhhUbWSHc75/vsyOpY8kNg5rwcVCtP
        I416k3KV1Lfu9F6ao+iwk6EOIJYelBRhZwVl2Wr9XZq55b8DviNo3wO8Za5YeN/CMWrbJQglazjku7Ke
        MsPk8zGFbPPI6AivbzPB1s0oQnhKvL83Zp97HgZTjaOUYidPG0eb5JyTXa/c27H45H41fE+XQ/HEZn8H
        a9cra21mNofS3J2wTRPjKuCQGPRgzZBAArmnlf8AZuEVbCaVYK7f83dNdu3Y64Zv/auMdHGq9Ko7Jfy9
        E0+/fvrcxT4F8PfBH4rXnh34oaLNq+hzKPsuo2s0kTJGW+WdVRhuGAQynJBBxnHPT9ar5ng1Xy+fLNbp
        pPXtrt5M5PqeHyrHSw+Z0+aD2abWnRq2/mun5918dP2bPBfhz4YyeP8AwZr1xdafmJliklSeKZJHCfI4
        AIILcg56EcV5mV51i6+L+pYuCT18mrK+p62b5Dg8Pgvr2DqNx07NO7to/wDhz5eeUxo+Odxr7g/Px0o/
        drQBe0QN/a1htyp8+POeP4hWdX4JejNaX8SPqj9Cv2jL/RbFbB9a+Juq+CLcRsTp+jNie75+9hAXx2z9
        39a/IcnhWnzexwyqPvLZffp+p+155OhDl9vipUl2ju/u1/Q8z8A/Bj4U/Huy1NtK8UeMNTurBkE82pXK
        +YpfcUbDR7SDtccc8H1zXt4vM8yyqUfaUoRUtrLt8zwcHlWVZxGTpVaknHe711vbdep83fHf4Y2fwk8f
        TeH7PW49bSOJZWdU2PAWziOQZI3AYPB6MOB0r7DK8dPMMOq84cv6+aPh83wEMtxTw8KnNp93k/M8/PWv
        XPFGPHuGaAPXfgF+zrJ8ZUv9RufEFlomh6a4F47OGuAMbshCQFXGfnY4yDgHBr5/Nc4jlvLTjTcpy27f
        f38kfT5PkrzRSqSqKMI79/u6Lzf4nqPiX9o7QPhD4d/4QD4MWT3bh2EmtzDzTJM2Azxrj945wBuIC8DC
        kYrxKOTVswq/Xc2lb+7tp59l5b93c9+vndDLaX1HJ43/AL2+vdd357dlY8r8H/CD4y+KfEsPiPS9H1mH
        WPO+0f2vqB+zMX/v75SN34Zr3sTmGVUKLoVJx5bW5Vr8rI+fw2W5viKyxFOElK9+Z6fO7Prn4H+BvGvw
        un1LW/ib8QRfR3UAiisrvUnlghO4EuWlICsAMYUY5PPSvz/NMVg8co0cvw9rPdRSb8tP1P0bKsJjMA5V
        syxF7rROTaXnr19DzvxV+zV8MPid421nW7b4qWrXOpXcly9ra3trNsdzkqMNnAJ4HpXrUM5zDBUIUpYV
        2ikrtSW3yPIr5JluOxE60cUrybdk4vf5mF8Sf2F7Lwx8PNV1rw9r95q2o2UP2tYLhEWOWFRucAj+Lbkj
        nnGO+a68FxRKviY0a9NRi9Lq+j6HLjuFYUMLOtQqOUoq9nazXU+QgRhue1foJ+dHvXwU8Y/BXwn8P5r3
        xl4ZfXPGEF0yxW5WSVbiIgFDhmESgHIORnjoc18pmWHzbEYlQwtTlptb6Kz/ADPrcsxOUYfDOeLpc1VP
        bV3XT+7+p6NpH7dNvbahpmj+G/h/YaFpsl1FE3+kDaI2YAkRxxoFOCe5rx6nC8pRlVr13KVn06+rbPap
        8VRjKNLD4dRjddenokjI/az8X+Otf+PLeC/DWpauYvs8EMGl6dO8ayu6b2LBSAeG5LcADsK6Mgw+DpZd
        9bxEY7tttJ2s7f1Y5+IMRja2ZfVMPKWySSbV7q/T9Tdu9a0v9jP4SXmi219b6h8U9fUSXBgO/wCy8EKz
        eioGbbn7zEnG3OOWNOpxHjFVlFrDw28/+H69l5nVKpT4awToxkniJ726f8N07vyON+EHxMl/aCv1+GXx
        OuZdWt9RLS6Vq3ypdWVyqEgBwMFWUMMMDzgdDx6OYYJZRH+0MvXK4/FHo0/8jzcuxzziX9n5i+ZS+GXV
        Nefmc18Uv2NPH/gG6mm0yybxXpAyUutNTMwHo8GSwP8Au7h7114HiLBYtJVHyS7Pb79vvsceO4bxuEbd
        OPtI91v81v8Adc8NmtpbKZ7eeJ4LmNirxSqVZSOoIPINfURkpLmi7o+VlFxfLJWYxgQBnrTEfUn7LV3a
        6X8CPjdcy39vbzy6a0MaSyBDu+zT7Ov95nwPUivh88jKeYYOKi2lL9Vf8j7vIZRp5djZOSTcf/bZW/M+
        VufSvuD4Q2PCdwbHxPo0xAG28hfn2cGsK65qU15P8jfDvlrQfmvzPpz/AIKFzbvH/heHOdumM23HTMrD
        /wBl/Svi+EV/s1V/3v0PuOMH/tNJf3f1Pk1gdx4r7s+AHxx5Uk5FBa2IyuDgc0FGj4eult9SWOR/LguV
        a3kfP3AwwG/A4P4VzYin7Sm0dWGqujVjNH6W/Cr4iaf4l+EmmeNdVEp1PSLN7TUFgyz+dF8si7B94sVB
        H+8K/EcZh50sVLDx+07o/csPXp18Oqy6FDxbql58SfCiazp2i3Ol+LPDUw1GPR710M0sDKQ8LhSQvmxF
        htPIOKqjBYeXLN+5PS/9eYpy+tQUoKzWq/yPgH4o/AL4eeDfE0d9feP5dH0DxEraloyjT2k2ws3zRM/T
        dG2VK9Riv0XBZjVrU/ZqPvQ0a/X5nxOMy6nGXtebRmRp3wH+H3iT93onxe0t7ljgR6hF5WT+OK7Z5nia
        S96ldHJDLqFXaoO1j9l34qeALX+2fDm3XrGP5xd+H7nzGx6lM8/SnDNcNiV7KquX1B5bXpP2lOVyj4a8
        X6B8WL2Hw346jXw14nVxFY+JoY/IaKbstwvGOe5oqwqUF7bC+/FdP8iqThXl7PEe6+4zxB420L4aXcvh
        f4ew/wBueIC5ivPEskRnmuZ8/MLdecjPenSjUxEfrNd8sX07f8EU5KlLkw8eZ9zR0f8AZW+KHja2Gs+J
        Xi8O2Uo3m68QXWx8euzPFZyzPB4a8KKcm+wf2bXq+/XlYi1H4H/Dnw2TFrHxf043K8NHp8HmgH8M1ccw
        xFZWpUn8xPL6ENXU1Nr4U/Az4e+KPEkms2fji41zw94a2ahqsDac0RlAb93Ar9N8jgAL1Oa48fmWJpx9
        nKCU5qy8l1OzBZfTcvbRei/E++NJ8K+JdL+GF/JDaWtx4t8QTm/1C0upPLjCvwLfdg4VI9qfQHFfnEq9
        OdePN8MNv8z7SFGdOg7by3X6HG6tNJ8HPgVq1xFC1r4m1Njp1qjTSSASyEpGIxISyIoLNt9BmuylH63j
        Ix3itTmqP6rh3U2Z8L+JL9JtWMSt5lvbItvAw7ogwD+OM/jX7DQp+zh5vU/FMXV9tWlI+nv2J/iCmjeN
        4dLuZAtvrtv9kYs3H2qEZj/Fozj8K+D4mwbnTdVdNT9D4Xxit7KT8j6LvbiX4Z/F+C6u9Ugg8O62pijt
        CpDRzEjGAPlC57nk5r49WxWE5baxPr21h8Trszx79qD4IReJYtZ8IBVgTX521rwxdNwkGqqv761J7CZR
        uHqc16+V4+VGUK/8ukvOPR/I4sdg4zjOk9par16r5nyp+zT4P8DePZ9R8LeKdMt9O8Y6a7lhfzGITKpw
        6nJADoe3pX2eZYivRiq1F3i+x87gMNhZtwrRSfmz1fVv2evg1IzQT6zodpMeMw6soYfT5sV5EcyzHf2d
        16HqPLsuejlZ+pnQfskzhjP8NfiRbPcgZWxnu47iJ/Y4Of0rf+2JJWxFKy72M/7MhF3oVLs868U/CzxD
        o/i2z07xV8IdRuvF8xxZjRMjTtTP96QjhcdTgjNd1PHU61Nyp1lGK89TllgeSd6lK8vwPQ0/ZU8c6vZx
        z+P/ABPpvgbTeq6Np0qQiJf7pYkc/nXDLNqC1owc5dzr/s2rNfvJqEexZsP2cPg3pr+VceJtK1C5J5a6
        1hCSfwOKh5njp/Zd/Qp5bgaekpL7zM+Mfwz+E3ws8Az69Nb6XqMsuYdPt7G98wzzY7lWOFXqSa2weKxu
        Kr+xd/O5GKweDoUfaJK/Sw39kr4Q6hp+hx6tJCbXxX43jex0iMg7rDS8/wCk3p/ugj5EJ65rjznMFVlZ
        O8Ke77vov1MsswPJHmf29j67+JMFnqNz4Z+GmiXUunPbJFcjyMr5cMWAgLDkZwfr3xXyeGvBVcXNXT6+
        Z9FiGqtSFBdDnv2sfGMOm+DNO8NGT59Xl867A4Is4PmkJ/3iAPfNbZHhpV63tXvH9TDN8QsPhuXb/gHw
        Nql8dS1G6vLhS0k8jSYA6ZPSv2aEeSKiuh+Gzk5ycn1IFPlgEEkn+GrsUthJYx5b5AX2FAyE4HGaACgA
        oAeqbh70WAa2xWwRzVIBGRWXI4FMBqnyxx1qWA1pFkJJU7+5xSAIyM9RQBOJCBgKCPWiyAXeSdmMBuap
        AGXbnPHSmAH5SN33R94HvQBFLnIz1oAC2Tt7UAPQbTigB0vUUGb3FOevagQ3oxzQA5pADgA7vWgBy5C7
        ifmqWAvm5pWAfGdxzQA9nIOKAFjl5oAe0vNACCUnp+lZsze5IjkHoRSJJ0bO4mgdiJkBOc0BYjbGcL97
        1rRbGi2E8vJ+Y/NTGQzRDJoArlinyj7/APCfSgLClgyAiqRothFB2imMjkyGyx+Wgze45ZABhelAhXyw
        Ur170AI5BY4oAjA3uR021LNFsTJJuyCaQxybVUAfe9aDN7jg5HB5P1osIcTuSg0WxE/C88UDGF9yqP7t
        ADjOzHJ+6e1FgGiYbvl6UWAmB3DNAEMvegBkUqqCNgLetADUmLv5Z4Dc0ASE5P6UAMftQA6gBwnEQAX7
        x+9RYBGwTlRgUAKhQNyOaDNjnYISV6GgRG4AOB971qkAqHnk5NMCepYBh+xwKQEiKzL85BAoAVpAEyv8
        XagCImNTg8mgCSJkwSfun7ooAASowTzQBMDux70XADGG5ouBIoIUDNZvczZIoyAmfvdaRIfOehwPrQAc
        9zk0AChg+T92gCZZo1JGMUAIMkZxhewoAXjqOBQAUAOjwDluR2oAkYNnLHI9qAGmTBwBxQBZ03VLnTL+
        3u7SVra5t5FlilQ4ZHU5VgfUEConCNSLhJXTLhOVOSnB2a1R2PxU+MXiP4uavb3viC4jb7NF5UFvboUh
        j/vMFyfmYjJP0HQADz8Dl2Hy6DhQW+7e/wDSPTzDM8Tmc1PEPbZLb+n1OT0ue2gv7eW9t2u7NXBmgSTy
        2dO4DYO046HBx6HpXoTUnFqDs+j3PNpuMZpzV11W34n1x8BPgD8MvF+t2HifRvE91rEFk63DaBfpGtxD
        IDlRNg/MoOOi7Wx1IyK/Ps2zbMMPTlh6tJRb05lezXl/w90fpWTZNlmJqRxNGq5KOvK7XT8/+GszD/aG
        /ar8Sab8UZbDwZqxsdO0Ym2kKokiXUwP7wsGBBUEbR9CQea6coyHDzwani4XlPX0XT/M5M64ixMMa6eD
        naMNOju+v+X4nkXxn+OupfG5PD8mq6dbWN3pkMkUklszbZmcqS20/d+6OMnvX0GW5XTyz2ipybUmt+lv
        zPm81zepm3s3Vik4p7db/keZ17Z4A+SV5du92faoVdxzgDoB7Ukkthtt7kD/AHjTEez/ABG/an8XfETw
        ra+Hf3WkaUltHBdJakmS7KqAS7nkKSM7Rgc4JavnMFkWFwdZ1/ildtX6enn5/kfUY/iHF42gsP8ADGyT
        tu/V9vL77nibvhiK+jPlyxYajdaRdwX9jdS2l5A4kingco8bA5BUjkGonCNSLhNXT6GkJypyU4OzWzR9
        ZfCj9t2x/wBAh+I+lLc3tsCkHiCzt1aRQeCXTqvuY+v93vXwOP4amuaWBlZPeLf5P/P7z9Gy7iqD5Y5h
        C8ltJLX5r/L7jyH9qv4l6H8Tvim2r6DdNfaWljDbxzmJo9zDcW4YA8Fscjt6V9BkWDq4HCeyrq0rt9/y
        PmuIcdRx+N9rQd42S2t+Z46pJGSRmvpVsfPLYfZ6jcaVfRXVrK0NzC6yxSocMjKcgg+oIzSklOLjJXTN
        IycJKUXZo3fFfxQ8XeOE8rXvEmp6rADkQXNy7RA+uzO39K46GCwuFd6NNRfktfvOzEY/FYpWr1HJeb0+
        45MylGOF/Gu65wn1Z4C/b41bQvCtppPiLwtF4kuLVFiF618YHlVfumRTG+5uB82RnGetfCYrhalVrOrQ
        q8ifS17emq0PvcLxZVo0VSr0udrre1/XR6m3ff8ABRm7kUpZeBIIJf70+qGVfyES/wA65o8IQT9+vf8A
        7dt+rOqfGUmvcoW9ZX/RHhfxz/aH1z48S6UNXsNO0+DTPNMCWSPuPmbd25mY5+4vTH419PlmU0crUvZS
        bcrXv5enqfLZpnFbNXD2sUlG9redu/oeVV7tzwR6uVGKLgSxpvO496LgOY/MUouB7H8J/wBqrxz8J4It
        Oguo9a0WLCpp+pZcRL6RuCGQegyVHpXzmPyLB49ubXLJ9V19Vs/z8z6TL8/xmXpQT5odn09Huvy8j1X4
        mftmeHvij8Jde8N3nhzUdN1W/hRYvKkjmtw6yK4LOSrAZXsprwcHw7XwONhXhUTjH1T2ttr+Z7mP4moY
        /BVMPOm4ykvJrdPfR/gfJz9K+8PzkjUrjBHNAFuTVbu5sobKS7nks7csYbZ5WMcRY5YqpOBk9cdahQgp
        OaWr3Zo6k5RUG3ZbLoiqAcVYLYWKeS2uEmhkaKWNgySIxDKR0II6Gk0pKzLTcXdbn0F8NP22vHHgi3is
        tZWLxbYJgA3zlLpR6CYZz9XVj718rjOGsHivfpfu5eW33f5NH2GB4oxmFShV/eR89/v/AM0x/wC03+0V
        4f8Ajp4V8ORadp99p2p2FzK88N0FKBWUD5XU88gdQOlGSZRWyutUc5Jxkla3+Q88zmhmtGmqcWpRbvf/
        ADPnXAHzZFfYXPjQDbhmi4G5L491+TwnF4UfVbhvD0NwbuPTy37tZCOT646nGcZJOMkmuVYaiq7xKj77
        Vr+R1PFV3QWGc3yJ3t5mA481zntXVc5T2j9mn9oS4+B2vXP22Ge/8O364urSEjerj7kiAkDd2IyMg+wr
        5zOsphmlJcjtOOz/ADTPpMkziWVVXzJuEt1+TR7Xrf8AwULAkdNI8Flk/hmvb/BP1RU+n8VfN0uEVa9W
        t9y/Vv8AQ+nq8Za2pUfvf6JfqfJfjLxPc+NfFmr6/dpFDc6ldSXUkcQ+RC7E7RnnAzjmvusPQjhqUKMd
        opL7j89xNeWKrTrz3k2/vMj5vWug5g+b1oM2dd8Nvir4j+FF/qd34cuktbi/tGtJHePftUkEMuejAjg8
        9TxXn4zAUMfGMa6uou/9eR6GBzDEZdKU8O7OSt/XmVPDPxC8S+CdXm1XQ9bvdN1CbPnTxSnM2Tk7wch+
        efmzzWtfCUMTBU60E0tvL07GWHxuIwtR1aM3GT3ff17/ADNvxl8ffiF8Q9M+wa/4nurzTyAHto0jgjkH
        +2saqH/4FmuTDZVgsJPno00n31f3XvY7MVnGPxsPZ16rce2i++yV/mcBvAPy9K9Y8Y+wPhf+3bYeGfBe
        k6P4l0TUtQv7GAW7X1tKjmcLwjMHIOduATk5Iz34/PsdwxOtXlVoTSTd7Pp9x+lZfxbChh4UcRBtxVrp
        rXtuZnxI/aS+EHxHsbhr34b3dzqMinF6DDazg9j5qFmPPZgR7GujBZPmeDkuTEJR7atfcznx+eZTjYvn
        wzcn10T+9X/G58rgxhzxj619yfnwrsUO5The1Aj6L+CPxl8D3/w6k8BfFeGa40OyuPt+mzL5zANzmE+V
        8w5ZiD0+dgcYFfH5nl2MjifruXO02rS2+/XT19D7fKszwUsI8BmivCLvHf7tNe9ump6P4g/bg8EadpUW
        h6H4Hn1fRoI0t0tr5o7eARqAFCptk4AAwCB0rx6XDOLnN1q1blk9bq7d/XQ9utxXgoQVGhQcoLSzslZe
        Wpl6z+0B8O7f9m3XtB8FRSaBql7uh/sWYMXQzyfvmV+QybC4GDwAowK3pZTjnmkK2LfNFa83otNO97HP
        VznL45RUoYNckpacr/vPXXta/wDkfIpYx9TktX6CfmoEBeBw1ACFjH1OSaAFwF+lABx60AdZ4j+K/i7x
        Zpdvpmqa/eT6ZBGsUdjGwit1VRhR5aAKcADGRXBRwGFw83Up00pPru/vep6VfMcXiYKnVqNxXTZfcrI5
        izup7S6iuLWeS2uIGDxzQuVdGHQgjkH6V2yippxkrpnnxlKElKLs0d344+PXjL4keENP8OeINSGoWVnO
        LhZWjAmkYKVXewxuwGPJGeckmvKw2VYXB1pV6EbNq3l8j2MXnGMx1COHxErpO/n8+55+zbDgV654obkI
        yw5+lAHqPwd/aL8U/BeKa10j7Ld6RPN58theR5UuVCllYEMpwqjrjgcV4eY5PhsyalVupJWuv6sfQZZn
        eKypOFKzi3dp9/zOXn+Iuqt8RpfG1uyWmrvqT6mojHyJI0hfbjuvOMHqOtdywdP6qsJLWPLy/hY8946r
        9ceNjpLm5vne/wBx9nH4s/Af4y6Jaaj4uj0iDV2iUXEN/C0dxC2OUEqgFlHYg4xjoeK/N/qGcZdUdPDc
        zj0s9H8uh+pf2jkeaU1UxfKpW1utV5X6/eT+HfBH7NWkahZ6tp1/4ZiuraRZYWufEDNtdTkHZLMQcEdx
        U1sVn9SLpzjOz3tD9VEqhhOHKU41acoXWqvP9HIxf2v9Y+Hvj/4ZNeWXirQr/wAQaTKktnFZ6hDNNKrs
        qyRhVYkgghunVB05rp4ep43CYvknSkoS3umlps9fu+Zy8S1MBjcHzwrRc4PS0k276NaP5/I+LIvEWqpo
        kuipqV1Ho0sonk08TMIGkHRimcZ98dh6Cv0l0aTqKs4rmWl7a/eflir1VSdFSfI9bX0v6FIYXjNbGAnz
        yuI1PynmgC9Z3fkXdtO5yY5FY/gQama5otFwfLJS7H3v8f8A4T/Dr4geJdP1/wAWeN4/DzpYJbRRC8gi
        86MO7qy7wSf9Y3TPb05/J8pzDHYSlKhhqPPrfZuzsl09D9kznLcvxtaOIxVfk0tuldXb6+pa8AePPgp8
        IfD1zpXhvxTpkO4mSW4klaaSaQDAZmA+b2A49BzWeLwubZjVVWvSb8tkkaYPGZNllJ0sPVS873bfn/wD
        899V1O61nU7u/vp3ury6laaaaQ5aR2OWY+5Jr9bhCNOKhBWS0R+MVKkqs3Um7t6tlXvjvVmYpPy0AIk0
        sCyeXI6LINrqrEBhnOD68gUmk9yk2rpMv+G/FF94T1zT9Z0uc2upWMomgnChtrD2III9jWVajDEU5Uqi
        vF6M1oV6mGqxrUnaUdUbvij42ePPF1zJcap4s1W4wciGO5aKIH2jTCj8BXHRy3B4dWp0kvld/e9Tur5r
        jsS71a0n87L7locfPcT3cm+aV5nx96Rix/M16CioqyR5kpOTvJ3K7cMc1RJoab4n1nSIJrbT9WvrGCZG
        jkjtrl41dSMMrBSMgjqDWM6NKo05xTa7pG8K9WknGnNpPs2jOwi8EZP0rpT0IWw1+QCBxVXKJ7S6NreQ
        SqA3lOrgHvg5qZe9FruVGXLJS7Ho/wAXPjdeeNvitqPjDw7JqHhma7tordvIuikoVUVWG9MHB2jjvXi5
        flsMNg44WvaaTb1Wm/Znt5hmk8VjJYuheDaS0eu3dHmNxcS3c8k88rzTSMXeSRizMx5JJPJNe0rRVloj
        w5ScneTuyzouuXvhrV7HVdMumtNQs5VngnTGUdTkHng/jUVYQrQdOorxejNKVWdCpGrTdpLVM900n9un
        4o6YAtxcaVq23GWvLEKW+vlFK+XqcMZdP4U4+j/zufVU+Ksxh8TUvVf5WPOPi78aNc+NOp2moa9Y6VbX
        VsjRrPp9r5TOpIwHYszMBjgE8ZPqa9fL8upZbBwoybT7u/3HjZjmdbM5qdaKTXZW+/8AQ4NNuOH3n0Ne
        tc81bDs57AH0FFxipKFLbuR2ouZvctaIkk+q2gRsTGZFXJxyWGOe1Z1JJQbfYumm5xS7n0x/wUDGPi1o
        TbwQdEjG3PTE8/P6/pXxnCT/ANjmv7z/ACR9rxev9tg/7i/Nny6wcsdp4+tfb3PhhvmsDtY5AouAuFX9
        4pJK9FouA1sy7sgLjnFFzRbH0v8Asm/GuDwt4i/svWnUaFruyzvmc/Lb3QG2GY+iyL8jH+8FNfA5/lzq
        L21H4lt+p+kcOZjFr6tM+ofB/wAF9W8F+OLzVtP1a10/RmmZ4tMtlcrIrEbnnZiTJIRkAk4XjAr4eri4
        1qKpyjd9z7SGGnCq5RdonmH7Q3wS8P8Aibw3qyu4v/AN/O1zJc6aBPN4dv8AobqILndC3/LWMdOo716e
        XY+tSknF2qLTX7S7eq6HJjMLRnGV9Yvt0Z+bPxY+EfiH4PazFZa9bxXFldL5mn61ZnzLLUIuzxSDjOOq
        9RX6dg8wp46HuPVbp7r1R8Ti8vq4SV3s+xV8BfFzxh8L9SjvvCviG90maMgmJZC8L+zIeCKrEYKhi48s
        op+ZlRxdahLe6PqDQ/Engb9unT/+Ef16ysPAfxpSI/2drFsu201Ugfcde5P93r6HtXydSOJ4fn7ak26P
        VdUfS044bNo8jVpjfEPjTwL+xDYP4X8HWdj42+L5jC6r4hvUEltprkcxxr6j+6PxPaqpUcVnc/b17wpb
        pLr5sdWph8qh7OnrI+XvHPxU8W/EvUpL7xT4gvtYuJGztllKxL7Kg4Ar63DYShQSjhopep8xWxVbENty
        0ND4T/CHXvi/qtxb6NHDY6TZDzNS168+Sy0+L+JpJOhb0Qck1jjsfRwUU5u8nslubYXL6mJfM/h8z9G/
        gp8JtC8CeENMvDbTWvgfSZluLGK9UR3GuX7fKt7cA/dXJxFGemcmvy7G4meKqtLWct/Jdl+rPt6GGp0K
        adrRX59z0Lw1f+Jr/wAb6jeHV9K1PTGmNtqGnmBobvTXUbo03Z2yEA4JxgjmvMreyVFU3Hlk9nvc6sPz
        ubq8149fI+Y/2mfjGvirxA66fOZNJ0zzbLTnU5FxcH5bi5H+yo/dof8AeIr7rIMt5IKVRe91/wAj4ziL
        M96VN7/1c+bDk/vK/QLn5udJ4K1ubS9Si8u5aylMiS29yDjyLhDmJ/pn5T7Ma8/G0ViKTj/Vup6eX4p4
        Sup9D9F9K1O0/aV+EFve24gtvEFq22WKVA32S9QfMpH909R7EGvyCaeU4pxkrxf4pn7OnDH4ZVF8RB4P
        1XTfjF4R1DwB4qSax8Q6aRGRK2LiN0/1dxG/98YByP5VOIoywk1iaTvF/wBWJw9T20XQr/EfKv7S37Mm
        oePdcdwtvpXxUhjO2QHybPxZCowJI26R3WOGQ/er6jLMzhhoc0veovp1h/wDy8ZgVianKvdmuvRnwprW
        jXPhzV7nStX06bTNUtnKT2V5GUljb0IP86+8oVqVaKlT1XQ+OrUa1GTjM7H4N+Ck8f8AiqbTY/ES+GJo
        bSW7ikVnEtw6Lny4wp6+pPQVxY6ssND2ihzeR14LD1a0vdnY+rPB03xS8PeFbPT4PjTeWvh3UIHiF3dw
        xyXBugiMsNlK3UP5m0E85U18pV+p1Z831fVdn+Z9TH20Icjlc8J+Onwm1rwb4S07xNrninVtb1K8uRDe
        WWqhg8Bddy7hn5SOhz17V7uX4qni6rpUoJWPFx2GlCmpOTPDGaBMbkVWY4AHVj6AdzX0c3GMeWa+Z8/G
        NSTtHU+m/gP+y9PcS6R4k8f6VdGzuHDaJ4MQkX2tSdVZ0P8AqbcdWc4yK+OzDNYRUsPhXZrefZf5n0+D
        y6UEqld37I+/tKtI/hB4f1DxN4gaC+8X6hEFeGzAEcKIMx2duvaKMdf7xBNfAtzxtRUKStCOv/Bfmz6b
        3cJBynu+nZ+XkUPhlpE+hWWs+OPFky2upagj3Mss6hTaWo+bk+mOg9MCtcZUVSpHC4b4Vp6snBQ9nGWI
        xG/Q+P8A45fE2bx74jv9TbfGdRCxWls3W209D+7Ujs0h+c/hX6JkeBjhqact1+J+c5/mLry9kvmeViTb
        GBX1dz40j3Z5yKLoCNgd2SQVouAj4ONo4ouAFtx29qLgLt28UXAb5gVyAMN60XAUEtISeTRcAflHouAd
        H546fyouAk+SvynB70XArDBHHSi4FiH/AFYouA/eRx2pXAegYqJAf3f8Qp3AYSSSZPmPb2ouAwHD8kUX
        AeTk0XAYz4YCi4E+S3OaLgG458v+9RcA3KTlwdo4YevpRcCN3KsQOnalcBynKg5Ap3AdzRdAPilMTN70
        XM3uTDHljFFxEQ++aLgWUZAoyOaLgG9VbKDBouBKHZxljzRdANkV2G0Hhuaze4DeRGN3WkA2PrVp6AOY
        BTuzVXAhlO/J60XNFsVzmi4w59RRdAI7kbR1ougGviRzv5B6UXAaYvJ6kZougASg/wAR/ClcBQc85zTu
        AZTuMmi4EUr4I2jii4D0YHOaLgRlnB46UrgOjeT1ouBISZiVbtTugCi4Axwu7uvFFwEXgUXAQTMjkdVo
        uBMJo5OopXAVrdWXIIA+tO4FZ4/LY45ougHI2VBNFwF3D1ouBJbvGrv5nfpRcBhZMnj5vWlcB6g7RTug
        Gt1ouA3gHJ+5/EPWlcB6LvXBp3Aa0XlsSOfpRcB6F2dCDjrRcze4BivB65pXESKcqCadwGM+DxSuAbN/
        PrRctbEka7ATTuigWVsfc3e9FzN7lhZdq7u6cUCJUPyjkc80AO5rN7mbGj71IViY8deKAsIpG7rQFhzh
        yxwePrQFhqruc+ZzjpQFhTMzMVPOO9Ag8w/dxx60ASKMKM0ASIQVHNA7C+btOMigQobdzmgBPMC8NyO1
        A7A2WCk8mgQrOV+goHqWdM1m90S+ivdOvJ7C8iOY7i1laORD6hlwRUTpwqxcKiTT6PUunUnSkp05NNdV
        oys7G4Ys5LMTkknkmr2I31YZJ68fWgQgJLEdvWgBxABIHP0oHYif7xoCxHI+BigQxTuGaB2GtnPBoERy
        dD60DsN/5ZigQf8ALMVotjRbCLwozxTKGtyTjmjQCN+Vo0AjHSjQLDvL3/dOD3o0ANofgcBaNAE3n0pa
        APjyxzimBOOlACDh6ADr5mOelAErkYXms3uZsU/WkSBXb83egCNmLNkgD370AOT7ow2R6mg1Ww1lYHcD
        QMTcSMseatbAMlbYOO9VoAxQFGM0ADFnAVTigCUbUAVuZB1NAC596AEA3uR/doAVpST0oARTl8nis3uA
        5nIPApAPQkqD0oM2MZm3YTII6n1oJHKcjJ4X0oAdweV6UAIv3jQA5s54oAbuI4oAY0hyeKAHgjywXGc9
        KB2EDFRg0CJomBBOaAAYI4+9QAjPtCj+Id6AFJJPzdaADrQAZydtAAV28UAFABjPUlPQjvQBIpOMsAB6
        CgdhcqenSgLAM9z8vagLEbgFtgGA3NAiaFvkJJ9qAInHzGgdhvHQcNQIemQoz1oAdQBGw+Y0AT2xMeD6
        0AS3SbSCOfpQA3e0gySSenNAyJz5bZ/vUCArhcUDsORk8oKB++P3T6UCIXOxiR360AIQFUYOT/doHYjY
        PKu3hQO1AhqgKo3Ak+tA7BhT0YgelAWGNGCc5z70BYco2rjIoENY89atbGq2E3lTgEk/3e1UMjlJJBI2
        n0oAQDLmgBWTc1GgB8i8Ec0ARs+GO0cUWAaTnk8UAKCccKCPWloaLYerJtG/5D7d6egxr8sSBgego0M2
        Kg2nd3o0ESk+cxdmOSMcnt2o0AYBtGKNAFSMSluRxRoA0GjQBjctRoaLYsaZqH9mXZk8vzYpFMc0LHiV
        D1U/49jg1nUpxqRszejVlQmqkN0fb3wB+PVp438Kt8PfFWrSx/bYGstK11n2POhXH2eVv4Z1HAP8YAI5
        r8qzfKp4ap9apR06rz7+jP17K80hj6PspytI7nwt4b8X/Dvx3Jo9kulpoT6eGitVRo7ZYosqkEYJ5lfJ
        Z5G7Y4rx51KFalzWd7/P19D1IwqYeXLF6MxJfh14c+K3h3Uf+EMWwudIuJJGv/CWtwGTTJ5A215IGHML
        bgQHTg4ziuj6zWw0oqto+kl8Xz7/ADEqdKsn7P5pnyl8Tf2HtBgupZLO41r4bXWSfses27ajphP/AEzu
        ossF/wB8V9Thc+rL3bKa8tH9zPErZdSl05GeUt+x98QdL1O3vND8ReE9RltpRLb3VjryQyxuOQwDgMpr
        2FnGHqL2dSDs901c4I4FwlelU19Qj/Y88e399Pc674j8I6U88hkmuLzXFnkd2OWYqgLMSaTznDw+GDbW
        1lZWBZe6jvUqI9Y+GX7EOgzTxy3kms/Eq5H/AC76dbtpmlKf+mlxL87L7KvNePjc8q1LptU197f3HoUM
        BRuuWLk/wPp0eE/DXwu0a2Hib7BdxaWBcWPgzw/DssrbbgtJsPNxIg+Ys5JwCQK+W9vWxLfsFa+8nu/8
        vkew1To613e2yRe8ZaXefFTxDcW8c66j4bkFvNbX1pcfuDEygy2s8X8YYfMrLypx0xWNKpDBxS2lqvO/
        dFuDrzTjrF/1qec/G/4v6V4U0S88IeFLpre1iHkarq0cvmSqMY+yRSE5eZh8rPn5Fz3r18ryypipxr4i
        Oq2XbzPIzPMaeBpOFN/8E+QdS1afVrgT7Vhj2iOGBPuxRjhUX2A/Ov1KjSjSjyo/JK1WVabnLqVdu3gu
        c+1baGJIECqGb5gelGgHtP7P3xy1P4Z+KU1CFZb0SKsOpacrf8f8C9HQf89ox0/vDivk86yqOLhzLp+B
        9pkebyw0vZT1TPtTxP4Z0/4xaLpfjrwDq0S6qqiW2uUYhJyAfkkA5DDpz06GvzqjWngpPC4mN159PQ/Q
        69BYq2Kw795GbpPjzQ/ibp7eCviZo39n6xGSpN2vlo8if8tIZB9xx1BU/jVTwk8O/bYKV4mdPFxqr2WM
        Vmcb8YP2XW8WWCw6vo1t8TdJjXFvcySi11y1TsEuR8swA7PiuzB5mqLtCTpy++P3dC62EU1r76/E+U77
        9kaz8Ga+dU8J+P77wbqkaSRpZeM9JkjMauCrKJkDI3Bxmvq3mtSpHlrQUo94u/52PHWEjSm/ZvlfmRw/
        Br4wWr6X9n+IPw7uLPTYfJto3uovJHTEpjZOZBtXD4zwKx+tYXX91LXy/wCCWqdSLuqiLmp/AnxV8QtN
        t9J8f/GbTdStopVmkg8P2Muo31y4GF8x1Qbyo4XJ4FQsXSwrdTD0Gn3eiLqRddWqVOb0PZPg5+yTpvhO
        5hvPDXg82V4o48U+Nws9yp/vW9kuVU+hc8V5WNzadX3ak7r+WO3zZ04fBJfwY/eez32o+FPgibq6M0/i
        XxrfKBNcXEokvbo9QpbpEnoi4Hsa8OMa2O+zyU18jrlOlhXeD5qhnaB4U1Txtf2nibx/aQpcWpaWw03f
        8tsp5Bl7EAdAfxrSvXo0EsPhpO73aFSozxL9titLHi37RHx1tvFsMmk6ZP5vhe3lxNIpx/a9wp4jX/p3
        Qjk9GIwK+jyXKZJqdVe9+CX+Z4Gd5rCjT5E/RfqfMd7eT6le3F1O/mXUzbi/of8ACv0iEYwSjE/KpzlU
        k5yd2yqOBk/drTQga5jx0paANXG3jpT0ACSnI/io0AXG3ijQAoAiY/Mcn5aAHJhjwSg7Y70aAOLlZCCu
        32o0AHAlcbv9X/EPWjQBLqAwEMTkHt7UaAQMAD8v3aAJoiNg5FADXkaJs9VPpRYB6yOQFiO1e+e9FgEk
        Bx8vB7n1osAxTHtHy/pQBIhUrx0oAZK3O8HJWgByHY2QSx67aLATeezDJUIPUUWAFOWyCW9zRYBJBhzQ
        BG/agCVSCBt+960WAUbu55oM3uNEhjfjnPpQIs7SqKxPB7UAPLBvmHANADfMx0P60BYlRsqDmgBfMIOB
        Wb3ATd53yk42+tIBR0rRbAGVH3hkUwI52ChSnQ9qNDRbDHi+XrRoMqsNpI9KNAGkkfP3XijQBGGGX35o
        AddcmP6UARxECMZOOvX60ASUAFACbh60AQS/fNFgFSR1AG0MtAEysCoONvtQAm8eooAdQAUAR87m2AMf
        4s9vpQA6MqFGDx70AOHPTmgAoAKAI2O5iO1AEJbZKV9KNABjk5o0AerkKBRoBLGzuyAHjmjQBQNnykjI
        o0AXPGe1GgDQ+HwOhoAcx8o7QcgelGgCFgw4+960Gb3HpkHk80CHN97JOV9KAE8wZwvSiwC7zRY0WwZJ
        5osMTfjjP6UEFiMEdetZvcT3JTyy0hE6KHkbL7aAAxCHlvmH8NAEkTLKCsg5Hc0ARcGQ46UAS0AFACKS
        zbV49aDN7iurBvlOFoJHoWIAc5Ws2aLYUBQxxwKRQ5kDHPHNACbccYoAKAJYGXdtf5V9RQA+cRljHGxZ
        G5yaAI0ZCvIyelAEjFTGoUYNADcGSVVY/d70AQsxViD930oAFl5bC7V9aAIiQx4O73oAUj5KAGgHHynB
        71otgGO+GO3pTAjzlmNACAHy6AGhti570ANZi53HoaABpfLUbRwaDRbDV6UDGOfmNACUAKh60AJQA9Zf
        KUY5zQZvcXfigRIpJUEn5fSgB33v9XwO9ADkaPPSgCRlEjHHAHSgCJg7HIPFAB8o+8Mt3NAC5GGxwMUA
        MThaAGS9RQaLYCyZ5GTQMjfG44GBWiehm9xy/dFO4hrMQxABP0rNgKhyeePrSAe3JoAen3BQAP2oAlXo
        BkfSgA59RQAxlYsfnI+lACKCC2Tk+poAQMVGMUASKSVB6UAOGT3oAASehFABye9AB83rQBGwO7nlaAHr
        gjjgelAD16c0AOQby3PSgzYgbIyaCRfMA4H3vWgBASXy3WgBzPhiKAEY5CmgBy8s2KDRbDVVupBK0FCE
        rnjgehoAlDq0YUfeXvQBHuL8t1rN7gODqNqMMq3NICR3V2JXhe2a0WwET/fNMBR1WgzZI5G7rQSJQAm/
        HSgB/m/KtZvcB5lJNICNmBJLcjtQaLYROCcn8aChByBQAjjINACf8sxWi2AYoOOfu+lMBxcMu0cCgCIw
        tnhsCgBMFeCwoAaxXPIyfXFADWAc4HAXoKADLtyDgfWgBrgkep9qAIw5AxQABw7bejepoAccg7Sc470A
        IQF4rRPQ0WwxioJLDK07jGkr/CMLWb3AAydxk0gJFIA44HpQA1gSScHHrQApbKKp4FAEvlAA80ARxLtB
        FAE1tGkhk3DkIaAKzYzxwMUAJQBe03WJdM8xAiT28oAmtpc7JAOnTkMOoYcg9Kxq0o1VZnTQrzw81ODP
        qb4RftWvDobeHvGEdz4p8PmI27TD5tTtIyMEOBgzpj+Nfnx1Br4HMMjkqjrYf3Xv5P8AyP0vL8+pYmKp
        19/62PcoPD+nePPA+nw/DbxPZ3Gj215bTi1tmCMscbgtG+0BhhRjaw5PWvl3UdKpfFQ111PoHTVanejK
        67I6jwgPF0fj7XodYe4l8NzgX9p9oVD5RbKta/RcBh9a5K3sXRUaT9/+tTppKo6nvrQ4jx94vsdB1vxu
        t14L8Papb+HrO2vXleACWTzm2hDxjI6124ek6ipr2jXNdb9jmxE6dJ1JezT5bdO5a0PxDp9z4mGlaf4b
        8OaFeLp8d9FdTWy7Ji7lfLQgffXjI96JwcY80pykrtaCp1acpWVNXsmcppPir4h/EmKWK4ub/wAOhYkk
        gextVEKypI0U8Tqww6kbX2nnB4Nb1Y4PD2lFc3qRCWJxGjTj6E1/4Y0bwDaf2x458Q2dsGu49Slt+iG8
        jQxiS3BzJtdfvRjPNYupWxL/AHEb9vJdn6G3soUV++Z4v8U/2jk/sltE8NWz+FPD5UoIoAIr+5QnJCqP
        +PdD6n5z7V9Jl+SzqS9piNZd+h83mWfU6EHSobdv8z5o1fWZtXkjDKkFtCNsFtEMRxL6Adye5PJPWvva
        NCFCNon5tXxFTES5pspJJtOK6DmJVcF85FADyGJyp4PvQAqTyW7qwLo6nKupwQfWk1fRjTtqj2D4LfHv
        XPhvrX2vTbqKKS4YfbLC5bFnf+5/55S/7Y4PevmcyyinioWttt5H1+VZ5PCyUaj0Ps/SPiF8OP2mNFfQ
        9SQ6XrgXLadeMIbuBv70T9HGe6nmvzythsZlkrx1j5bfM/RqdbCZlFSe/mXLzwb8RvAt9G3hfV7fVNDW
        FIRpVxEA0RXq4J67uc1MMRga8bV4NS7jlRxdCV6crx7DLn406ro32i08X+B7yR4doSWyg86O45+ZlU5w
        B1pxwEJ64er8hPFyWlemY0Xxr+HmpMrx+C52nkLFBJpagkKcMWJHy464PatfqGK6VfxMljMO96T+4fF8
        e4hCD4b8A37h2KQlbcQh2H8JwMqfTNT/AGe73xFa3zuUsb/z5o/gR6hffEnxzshUJ4JtJIsXRlUSSxyc
        4EbdWB457c1Dhg6ElL42vxByxNfo4eZnpoHgb4FWj61rWol9Sl+9f6i3nXc7HtFEMkn0wKc8Vi8xn7Ol
        pFdO3qzeOHo4P97UleTPA/jd8f8AUPFUM2miKbRNDbk6WJMXl6O32hh/q4z/AM8xye9fUZRkcaT9pLVv
        r/kfKZxnnI/Z7vov8z581HVJ9XvDPOR0CRoi7UjQdFUDoB6V97SpRox5YH5tWrTrzdSo7tlPD7B83y9h
        mtTEapUD5uR2oAa0gU4YEn1oANwbkcCgAoAjuPuigBolX7hBOParT0AY2Cx29Kq4Do5xGDt+961m9wJI
        5TIoLEbjSAcVK/MTwentQBGQZGIc/N3oAjnzEAp5UVaegCb1ABQYLVVwDJj4PNF0A4y4Vc8UXQEjb5xt
        zgCi4CYIjGetFwIiAep2ehHei4CD7/IC+wouBIJfLc470XAXDeYSDxRcCeOQqcE5NF0A8tuJORRdAM2Z
        ZiSNpouA0OE4XpSuAhYN95tnoR3ouBIsmBzhfYU7gL5nvSuBIjFxg/douAv7teAP0p3ACGPK8LRcB0ch
        Q4J5rN7mb3HlQ8m496QiXhRjNAAnVqAIz1oNFsRyDpQMQxhzt7NyaAIJMbz7cUAMxv8AwrRPQBskv3Pb
        NO6AqgeaRnsaVwJHl+andAJ5jelF0Amc80XAKLgL5hHGMD+9RcADb+Mkj1NF0A9QEXDcjtRcBcjp/FRc
        BSWj68lqLgDJuTH93mi6Ai37+DxRdASRoyggHAougHxn5Bk5NFwEJAduaLgOj+6KLgNcKxOCA31rN7gR
        MpDEdT7UgE3FeMGgCxEd0YNACbYy7ZHNAAi7VH9z0oAR/mY+Xx61aegD1xtGBgVVwFYjbRcBqfdouAuV
        9qLgSDOACAo/vd6VwDPo2fc07oBefUUXQBz6ii6AnjbJ29BWb3M2SqAr4zSEPYliRg4XpQA0SSTfL0C+
        tAEqbioyeaAADaxagBzhyu8HrQA1SzDJPNAD4/ve9Bm9wn5YGgVh0chGeKze5othqOWbB4pDJwoXhvmH
        agBPMK8E0AKDu5oAKADKY+b5fcd6AAyYPA2+woAPnbkHigBN5HB5NAC7s80ARtncSeVoAGKlPl4NADDI
        yqoPJoARyWbNaLYBpcrTAaTuOaAGkP2OB9aAGSZxycmgBi9KAHMN6YJxtoNFsQls80DGHJPBoAUEADJG
        aAEY4PUD60AKhJO00APYbWIoM2PT7goELQA7zvlVPSgB3/LWgBwO5mXcRQA5F2qADmgB3zetAEUoORQA
        GPJzQBG2AxGaDRbAlu0mXBwO1AyIktHITyc81a2M2BGelVoIfG3lqT0zWbAFlRxuYcmkAuQenSgAL44o
        AkTlQaAAcMX7rQA4jB/WgBpZwcKeKAJELFRk80ALz6igBrdaAG4J+7we9ACE7OV6NQBIo2qBkUAI3WgB
        gfD4oAkVstk0APOSeDQAqnigzYk33VoJFT7goAXIoAWgdgoEIMFuTsHYjvQaLYmSZoiSRx6CgojLxy/O
        wwT60AIQB06UAIDnpzWb3AVgcKMc0gFm+6BVrYBKoAoM2FArBgjlvu0CJFIwMcCgdgX72aze4hzAk/Lw
        e9IB4KmMbeCOtBothpiWRcKMK3NBQRusSDdyF+bj2oATzFkZnHAbnFAEJ61a2AUgBN2aoCLJbmgBMljt
        NADGhAY80APVSFABoAYdvmHIyfpQAMiscjgUAMGA+C2z0x3oAJc7zkY9qAIH+8aAHpjbQA2TqKtWsaLY
        SQZITs3JqtBisybeRyOKze4DFK5+UYPrSAe0ZJy3WgB4VQgAkJP93tQBG4xjep9hQBIAQOetADk+9QBI
        JdrM393gUAV8/O5AD56g9qAIwMDg59zQAdWH1oAGeRJxJG5QIc5U4OfY0mr6MadtjpND+Ieq6HfJdiWU
        XqdL60ma3ufxkX73/Aga8+vgaVdWaPWwuaYnC6Qloe0+Ff20PGekBI59ch1O3HHl65Yb3H/bWEgn8Vr5
        utw5h56xjZ+Tt+Z9RR4omvjR2v8Aw3HbTRyLqHh3QLpnAEpimuR5uOm4NAc/ia8r/Viqvgk7fL/M9ePE
        uFkvftf0f+RWu/23rXykWz8O6BblCTGZpblvLJ6kBYB/OqjwvVfxTfyt/mTPibDRs4pP5P8AyOC8V/th
        +LdYaWNNbjsLc8CPQ7Hy2I/66zFiPwWvVocOUoWctfXU8yvxTOWlNfoeNa18RNR1e8kuleQXUn3ry5ma
        e5P/AG0b7v8AwECvpMPl9HDr3T5bFZricTu7I5h5GllZnYvIxyWY5JNd9ktEeQ23qxtAgoAAUDcjmgCy
        rqi7iMjsPSgBQ7yff6UAJsVHyvSgDa0zxJdWSRI+26gjO5I5Scxn1RwQyfga5a2GpVviR3YfG1sM7wZ7
        b4E/a18X+FUht4dfe6tUGDZ6/EblB7LMuHA+oNfM4nIKNZt217rR/wCR9bhuJZwsqh7bof7csMsS/wBr
        eHbbIGGk07V4sH3CSlT+FfO1OGq0buEvwd/wPoocR4aatK332/Mvv+2j4GYNu0a9ViclVe1OT9Q9cb4f
        x3SX4M7VneXtX0/8CX+Zm6j+2lo5ic6ZoDytjObrVbaBfyVyT+VbU+HMS/jn+DMqnEGFgvdt8mjy/wAU
        ftb+I9ZZoYdQsfD9seqaPAbm5I9PNkwq/UA17NHhqnCzau/M8itxTHVRenkeNaz8Q5r2+ku7fz/tsmQ+
        oXkxnu2Hs7cJ/wABAr6ahl0aatK1uyPjsXnNeu37NWffqclNcvO7M7FixySTkk+pPevYSskj59Jt80nd
        sgfkYH3z90+lMsgzuJUD5/4T/OgBdoXgUADSELigBsbZyelACIfmoACPMd/agBgLMMjg981atYCOVFcg
        52DtjvT0AUqdxG3GOwqGA1cFuPvetICyhwoBIzQA15UU4x83rQBDIxkIGMj2q1awAy7Tiq0AAcfeGR2o
        0AApk4PJFGgAshy1GgCLMrDa27P0paAAwH46e9PQBzcsaNAEyY+f71GgBt2nFLQCSLoaNAJoFQqCMBu5
        PejQBzhd5CDinoA3Kdxk/SjQCNmjLHj9KNAHxNEAdwyD0o0AF6UaAPWRojwDzRoA5nIPFLQAyTzmjQBA
        cMah7mb3Jkx8xYZHakIdBgqRIQcfdoAVfMYZz+tAC8jqeaDRbBuzx2oGQz/u+nIPpQBAy7UxQBE0u1cZ
        Aq1awEZO5M1WgDQDijQBdu/j0o0AFbMiGjQBT9z86NAGL0oAXtntRoAUaALvK8YpaAGSwyRgf3qegCbX
        P3WJHvRoBIm4KNxyKNAHtGvkuxGQego0AhPXltzf3aNAEIfrwo9M0tAHRhgW48w989qdgCIg/KWKgdD6
        0WAmaJM/Moz7Vm9wIXUwtuQgBu1IBvmt90/nQBLEGwcGgAUYGc5NAApkd+MgUASKpR8GrVrAOYjdjPNV
        oBEfvk9vWloAMdhyOd1PQB6qMYfkD7tGgDgS3Xk0aAGUH3hz9KNADIPTpRoAUtALDfdWswLAaPYvHzet
        ACyO4AweBQAbj5mWPNAEocjpWb3M2SiP92JG/wBV/EKQhf8AlkPTtQAiqJFAA+b1oAZJGbc5zkmgByNu
        G2gBclOMUAGcn3oAkUNjjgd6AGMVLHbwKAHLJtGKAF37uCaAGOrhiFOB9aACMHnPJoAcg4+ZyB6UAOUK
        pZlPHvQBEW3cmgBNw9aAEC5Zl7NzQA3nZyMY4oAiLkDGK0WwB8x5P3fSmAGTBwo4oAYxLNnuaAG0Gi2A
        c9OaBjZCMdaAITytADVzigBxjWVcZwwoASII24SjJHSgByHKg0AOoAkQ8CgBj/eNADo2QH5hzQBOCO3S
        gze5Ip+Uc0CGMfmLdSvFAD1UhR+dADHkKsRQABsqxPXFAEIj3c0Gi2BncLsHQUDEhiE7mJ2255yO9ACY
        fe+MKBxgGgCM8BedzehoAcx55AX2FAD0PyigBaAHrIVGKDN7jt27nvQIU8UAIAd/SgBT1oAKACgBDMi8
        Ec0AAYMMjpQAg/1lADj1oAaAd9ADmUg7j92gBytuGRx7UAKv3jWb3AVs7iTytIBN+Pug4rRbALyeaYDx
        /qn+tACOCW4oAbg5xWb3ATe44U8UgFw0n3uooATdt5BJJ7UAWIYUaFyTsfO3AoARxJtzkYHG7vxxQAxc
        lcklvc0ALsdRv3DaegzQAeY3pQAg4ct3NADmk8wfSgBqtvGT1oAkwxRcHigCVCSdpoASSFi5weKAFUNE
        BnkHtQA1gAx2jAoAif75oAjbOaAA/cFADVzitFsAvzetMBOfUUAL83rQAnPqKAGt1z+tAETHJPAA/vCg
        tbDeB0bd7mgojbljQAkfEjZ4oAY7kMaAHR5JzigAkBLnFAABwEPG7k0AKDnkEsemO1AD1k2ttxtf0oAk
        diRycmgBi9KAJUZAoyOaAGuQWOOlAEL/AHjQAlABvKjGMA/xCgBrR+WcKdw9aAGD71ACTEHOPvetAEG8
        pxJz6UAH3fnk5J6UARkszEtyPSgBAFl4UYK0AG7d1+/3NACZMfU8nrQAYxwOaAFfotAE6MMDkUANYOWJ
        DDb25oAMjcvNACxPg4oAsAlhmgB6yoowwyaAF80HoOKADO7mgA2EjKOVkPQ+1ABuVuVzj39aAGNnNABh
        qAInkKsRQABtwzQAUFp6EbxMzEjpQO42NSrsD1oC5KvAoHcY2Nx5yf7p6UBcicYO4gKT2FAriLMVyeUz
        3A60DuKmfmyNvtQFySExNBMrD97/AAGgLkCSYbLZb/ZxxQK5bRg6gqu0HtQO5FN0NAXIlBA5+76UCuHm
        Y4j+XHXNAXDcG5HSgdxQH3pg8UCuJgjOeuaB3F24G4UBcP8AW9eMetAXELZaN+pXigLgjFZGCMc9SD0o
        M3uSgiYcgJjtQIes3lKG7tQA8uQgYc7vSgCJRtJGaAGrkNz930oAVwzOCn3e1AEzCQAAn9aAGLIVGOpo
        AeDu+tAAvVqAHQycGLoG6mgCSNk2jI5oAcQx5XhaADkdTzQBIkZZQScr6UAJJtAwvSgCtJyKAKrIu4nb
        vJ657UAIu1SwByPegBOCn3yPYUAIOB3P1oAYy7SW9aC1sJl35FBVx6lQMMMt3oC41pArZx+7/iHrQK45
        ScDPBPSgdxcj1oC4Bj9wdG5oM2Lu343Ex9h70CJFDY+5k9we1ACApG+S7MGoAkdIyP3f60AQFCD5Z53c
        mgCTz9kYA+8eKpOxa2IlJ3cnJp8yHoWUIwBUvUh7jJFTzAWHNIQk+ASB0oAhQEt8vB7mgBxkAkO0cUAW
        EbKjPBoAJOgoAa5UEuRkrxQAknCL/d64oAfGQVG3pQA1h5jH0WgB8TBgeMNQA1QytlzxQBIcHkfdoAb8
        3ZuPrQBZ81F4IyaAJFYMARwKAJohn5P73NADY4vOY/7NADmkcv5Y+VW71m9zNgZPlBZyUHD+9IQ6OVgg
        ySV7UAO81j93he1ACgsRknmgBPNAOB971oAkSQ7Rnk0AOxkbiAAf4u9ACebk8Et7mgBFOXzQA5/vmgAT
        AJ3cg9KAGgEDnrQAgkw5HpQA9hzv9aAE3buaAI2bcxX0oANpXgGgBFdwWAPFADGaRlzmgBYt2wZNaLYB
        rylWIpgAbdzQBG0mJlFAEROST70Gi2HRgk/JwR96gYkrR7zxQBE2Sx28LQANjZj+P1oAiwR97k0APXO0
        UALtB6sR9KAH9FXnPvQA9l2/NQA3du5oAcAq7WYZBoAsB4nfIXigze4pIJ46UCG7drFqAFabmgBT9zf6
        0ANRkZQSOaAGuQWOOlBotiJm3MVoGNK4GY+HTqaAGMCD+tADl6UANbOaAHL0oAlRXKjB4oAACHOetBm9
        ybCKNxHJoEAZW5I4PSgBDIU4PWgBjHc2aAHp9wUAL5hU88r6UARs8bHOKAJAQYxjpQAifcFACmQrxQA9
        CWUGgB3zetAER/1tAEqd6ze4CDOKQC81otgDmmAc0ACybSwzQAkbZDSf3eKze4EsERZSWACHnPekBG7h
        BtUkqOhNACKSy5oAa0m1gKAJnUzbQvBoAfNbywIrs2QaAIWfyjgDeD1B7UANWX5uCT7mgBzTJnkZNACe
        aD04FAD1OVBoAmi6GgAETMMg8UAG4x/KeooAPNoAFV5XIBwKAHMhjO08kUAV5M7zQAq9KAIZpNuRWi2A
        IiWQGmASdKACLOwUAEnSgBgwIg2Sf9mgBn1G32FBotgbYsYYjmgZFkucpxmgCNg4Yhjlu9ADl6UALtc9
        DxQAxmkUkZoAQIzjc3INADiPlUJxQBIxUHDjMnc0ANoAekqooBHNADtwbkdKACgCN/vGgBKAFEe7mgA+
        6Mgkn0NADJySFyNvsKAInj3LmgCJhtXFACf8sxQBERuzk7MdCO9AARIeRhR6CgA+Y/KwA/2qAEzGOuWP
        qaAHIQc46UAB/wBXQA0MgHI5oAcgB3Y6UANoAfHJg4oAm82gBQ24ZoAkXO0UASKuVGTs9CO9AC+YRxjA
        9AaABjuCmgBsmdxoAYZzGdvrQAkkOBQBXLbDigBPMoNEtA8ygLEZmBc4+9QFhWkbPPWgYpOUzQKwnCxj
        dyO1AWEi8zB5oGAcqMHrQAZzzQKwecc7PSgLCs7qoAPFAxnnEqqntQBIy7fmoFYh3o0hJHNAWJfNjHG2
        gYm4NyOBQKw4/wCroCw0PgYoGLv38UCsKF2yIKAsN9frQQwoEFAFiMlIwx+63agBwiBf5eBQBFcgKxA+
        960AMiYoATyaAHySmTD/AN3igBzKEOB97rQAwOVcg9aAJg24ZoAXGSE/v80ANEuHPtxQBMCWGaADmgB6
        yHBBOzb0I70AOAMw5GPagBkieX8vpQBE0e5M0AV5IuKAI1TYuaAHFt0eaAI2+5QaJaDVztFAxefagBGX
        zMA/w0CsSo6F0MgzxxQMjJUE5HNADlDFQVOF7UGb3Anaw8znPSgRYdZMDJyvagBscqLuBHNADFYMWI6U
        ANoAv6dpiXrBpJjEFBIAGc1k3qWloU7hFSQlDlc4HGKm7HYa0xJwQB7itVsQ9xrS/dAO73NUIft38+tA
        CEbTigAyTxjHvQAnGeCW9zQBIkvGz0oAmThRQBBL980AMWXyifegCxD/AKsUAPoAil4wc5/2aAFcuw24
        Cj0FACIhVQD1oA//2Q==
</value>
  </data>
  <data name="设置ToolStripMenuItem.BackgroundImage" type="System.Drawing.Bitmap, System.Drawing" mimetype="application/x-microsoft.net.object.bytearray.base64">
    <value>
        /9j/4AAQSkZJRgABAQEASABIAAD/4QAwRXhpZgAATU0AKgAAAAgAAQExAAIAAAAOAAAAGgAAAAB3d3cu
        bWVpdHUuY29tAP/bAEMAAwICAwICAwMDAwQDAwQFCAUFBAQFCgcHBggMCgwMCwoLCw0OEhANDhEOCwsQ
        FhARExQVFRUMDxcYFhQYEhQVFP/bAEMBAwQEBQQFCQUFCRQNCw0UFBQUFBQUFBQUFBQUFBQUFBQUFBQU
        FBQUFBQUFBQUFBQUFBQUFBQUFBQUFBQUFBQUFP/AABEIAH8GpAMBEQACEQEDEQH/xAAfAAABBQEBAQEB
        AQAAAAAAAAAAAQIDBAUGBwgJCgv/xAC1EAACAQMDAgQDBQUEBAAAAX0BAgMABBEFEiExQQYTUWEHInEU
        MoGRoQgjQrHBFVLR8CQzYnKCCQoWFxgZGiUmJygpKjQ1Njc4OTpDREVGR0hJSlNUVVZXWFlaY2RlZmdo
        aWpzdHV2d3h5eoOEhYaHiImKkpOUlZaXmJmaoqOkpaanqKmqsrO0tba3uLm6wsPExcbHyMnK0tPU1dbX
        2Nna4eLj5OXm5+jp6vHy8/T19vf4+fr/xAAfAQADAQEBAQEBAQEBAAAAAAAAAQIDBAUGBwgJCgv/xAC1
        EQACAQIEBAMEBwUEBAABAncAAQIDEQQFITEGEkFRB2FxEyIygQgUQpGhscEJIzNS8BVictEKFiQ04SXx
        FxgZGiYnKCkqNTY3ODk6Q0RFRkdISUpTVFVWV1hZWmNkZWZnaGlqc3R1dnd4eXqCg4SFhoeIiYqSk5SV
        lpeYmZqio6Slpqeoqaqys7S1tre4ubrCw8TFxsfIycrS09TV1tfY2dri4+Tl5ufo6ery8/T19vf4+fr/
        2gAMAwEAAhEDEQA/AOCr+kD+W3uOjJQ8c564oETgBeM0APTrQBIchgSflqWA9pAJTjgUrgDHcc0XAkiY
        gFOgbnNFwHwuGUnPtRcze4wyFTyfl9KLkkisCoPQH1rN7gOyKQCFQo3MMg9KAAeYwzmgAUHec8n2oAk3
        kUAAOWzQBLQAUARs5DEUAJv28/3qAGP+6bjvQAnC8Zq09DRbEEv+sNVcoQ/couA0dKLgIe9UgIBTAjZf
        mJHJ9qDRbETHLZoGRsMk4B3etACYYdTzQBGzKhyRknuKDRbBtb+A/LQMTcSdpPNABjZxQAinMmKDN7ku
        SflPGKBC4VeMZNAB9OB6UAIWI4oGPjOTmgQ9iC3H3vWgBvI6nmgBjHYcjvQA4qVVcnK+lABJyxK8CgBn
        PUnK0APQMT8pwvYUASSMyDawOaAFjyUBxQZvcawO48UCHLjaMnZ6Y70ANdZCxwAo9BQA5RJtHP60AO57
        8mgBDL5XTnNAC5duAeKADaV4PNBotgoGSKH28HA+tBm9yMuyyEHn3oEKxy1AD4+AaAEGB3yf7poAXzCP
        4QPpQBIpZlBzigBrA55oAcudoxQArx7gp60AKxKHFQ2AgJPNF0AcD74yO1FwBDgsCeaLgCHJZTRcB0Q2
        8UXAex+ai4EbsYjk/dai4DiFULtP/ATRcB2fn5AX2FFwFY/MaLgJzRcAAPflfSi4CZHbgUXAUR55ouAY
        VfvDIouAb1Y7V4Wi4DJQ0fCnr2ouBCYSOvWqQBjbxTAjf71ACFypxzxQBGzoTluTQA3I7cCgBjZ3ZPK0
        Gi2ADP3RxQMORQaLYY33jQMYOJlPagB3c/WgBMj1oAPvfICN78qfSgBA8Zc8cjg0Gb3HtjPAwO1AhPlH
        BHP0oAD7IMe9ACfUY9qAEMm04oAazbjkDBoNFsOXcANxyKBjmIK8dKBkNAgoAGxhcfeoGMkzuOetBa2G
        0FBucdDgUAAkPfk0ASIdy5oM3uOxj5qCR0au53ADB9aAJwGUYOM+1AEbybWyf9WPvD1oAXzTtXJzQMmU
        7m29n5oMnuHmYkNAhWbc2aACgB4d1UYOBQA4Enk9aAFyoHKA+5oAaknzts+X1oASRg4yOlAEROQq0AOI
        2nGc0AAbd8vagBzRAKP5UAMXCjFADGDFjg8UAIXK8HrQMepdhw34ZoEOG4/KfzoAVhtTFAEbh9vBwKAG
        KxAweTQMRpRuGWI9qBFgyZQYyw9aAEViyhSu0evegA2heAdw9TQAxs5NACFdvzUAAYsM0APWQIMPyO1A
        BuJPJ5oAXG35u9AEbSnccDf7HtQA5X2qCDndQMXAXigRJGUB5HNADjgyHHSgB6vufb/doAXd50hzwRQA
        9iWAJOVqWzN7kwkAHyjildCFyG6D5vWi4Bgjr1ouAc9MAD170XARYRI+N2fc0XAdLJ9iG0c/Slc0WxSk
        fzHLetFxip+9G3ptq0A1wAxNMBvm0DI2bLE0ASbyLdhjNAhPPcgKZGRB0296AJVkkAHOE9KAFDhhnIoA
        B97pgf3hQBMsPmqcSnA9aAItsmzAbNAEbKXXDHlaAGJLzwMN60Gb3HGRs85JoEBbueM+tBothjABiR9+
        gZCxySZOc9KAD5h1PNACFiOKBhknvQIXn1oAOaADPuKADbv4NAEbIY2x1Wg0WwMAF3AfhQUJGS2TigQ+
        POwUAOjTLsaBkchdXIU8UCGrMxfa1AyUPt4oAXO7vQZvcQhh3xQSPjQucH+GgCVZCX2f3qAHlt5z+FAC
        Yc/dPFADy7KqgcMPvVDYEpkWQKqjBpXAWQPFt+br70XAlCbBnOTRcBM7uadzN7mYv3qsHuTJ+6dnHVqB
        CD75oAsJOm0Jj5h3oAdt38H+GpYDo8SHBOKQD2AjYrkcUAIHI7lh/doAUnPO3b7UWM3uOjKA/OM+lArD
        2w7EE/drN7gOhuFBOUB96QDvNJOcfJ6CgCRWDLkcD0NACqMZZTg96AEDbhkcD3oAXmgLCc55OR6UBYN+
        PuggUANeQ46GgLDVOVFAWDIoAYy+Yx9BWi2NFsRMdzZpjG0AGaAGv0qkBDTAjclT8o25+8woNFsRyKBj
        bll9aBiNjPLke1AEEx2cg7s0DGbdsYFBa2EU+Wuf71BQMAAAB81Ah2VH3hlu5oAQLhtwXC+o60Gb3JQS
        wyCW9zQITa4+ZTQAAlmy3WgBWfBoGAJIzQIMGgA5oAMGgAIIGe1ACbi3y0AGzPy5Hy0AODB9qj7x5zQB
        JPdtMFD8dt1ADQzjAViR2oM3uSxSHBzyaBAOm7oTQAu7dzQAUAFAEbcsaAHrwozxQAu7dx2oNFsSQeWk
        o3jPHFAxjfeP1oM3uNeXIVADkd6BChmWdQeeOtAEitkZPrQAx+tAD0+6KAFoAerZG2gBcbeARQAm/BxQ
        AuSec1LAXn1pAB+7QAioGAwPmoAXay8E5NABg0AJyMv3TigAA2HlfMz0B/hoAkSP5QSxb3oAOAcZoAXj
        oB81ABIzJGoIOfWgBY23ZNADc/u3HfNADXZw3ynigBVJI+brQA2XnHAA/vCgAK7fm7f3u9AETSOTlWyP
        U1SAASRlutMCNo2clgeB70AIXaRAQcN/FQBE/RdqZHrQA2TO48Y9qAEZSE3UGi2GiZljBTgtQMFDBRuI
        JoNVsNbk0ANyW+XFAC7dvFAEblAxyOfpQA3g9BxQAgxuOB83rQQyUOU4f5vTFBIu2T7+aADJPLdaADbv
        /CgYoZSMkEn6UADY28cCgtbENAwzQMliXeDnjFAFeTezkg4FACb2UYPPvQAhOefWg0WwZHrQMAd3y0AM
        c7GIHSgByT7FB9aDNkqtkbaBAJNrmPsKAJkk2ZHFADSSQpJ+WgBeN+RwKAJuce1Bm9wGT0OaBD1KbcEf
        P60AO24G6gQEgplxkHpQAsfCDJ5oAJGyNvagCNFKnnlKAHl+flBxQAmc80ARudhz60DHq2xQKAF3l/lH
        D/wn0oAYy4Jx0HWgQikoSe9AyJyZMNg0CJB90cAD+9QMN4HAkY/hQIN57ZPvQMYwYsSeV9KAHryvy8Cg
        BrFQfmGT64oECOwb5OF7UAPZ2J5yTQMTDnkUALhu9AEbLJuPPy+lACFypxigA8w+lADo2BPAw3rQBIwY
        HnrQITkZbqV7UDDaR/OgQYNADjIVVR6UALkM+SxFADml8s4HIP8AEOtADkGVwp3Ofut6UASoRtGKlmb3
        JFkwMZpWESrNhR/jRYBfN/zmiwA/Cq/rQA+Rw8Q4AP8AeoAqsMLyd3uaLGi2IelFhgkmCRVICInJyeKY
        BQAxuCecUAOEpWMN1K8UACy4AoGOLZSgQsRThCPvcmgB7Sjdx06UDHrKcCgQ5X2kt/eoGMcbV9qBEaZ3
        HJ+X0oM2OaUZ+U/LQIBKrcEbyPXt9KDRbEbyfxAfK38XegZGyEE4JYepoAa3IHegBxzmgBvmKvBUk0AL
        ndyOBQAc0AMdlQkkEmgByt5ihhwD2NAxeaC1sMfrzQMRZCpIoGNBDdWIPoKAJUPyjBz9aAGt1NACYoEN
        H+soAUkpITQQ9yQPvG5wSD0oESRyFAQetAgVgw4+9QAu9l4PJoAesm1Q3egBWfeoapYEueBkAD+93pWA
        UYHQ59zRYBC+3iiwEqTHaKDN7lVEDQrj73rVmgiAocE80ATAg96hsBTjoB81K4Eibtozgmi4Ei7FGSPm
        ouBHvR5CNpxTuZvcerhXIXoKLiHO27BouAM2w5Hei4CbdpxWb3AlQoFGRz9KQEiyYUbRxQA5SWLGgBFH
        GMc0APJ+VaAGySbW9qAE83jgYb1oAPNbvyaADzT6UAKDu5oAil9e1ACvJhcVonoBEDl0NO4DfX60XAYx
        56ii6ATJ9RRdAMkPbPT56LoCJuVz3PNUjRbEe91DAHApjIVLEcnmg0WwZPqKChkkpUFupT0oAYpyM+vN
        Ahc0AGaAJF+6OaCGGSnI53UEi4K8ZoAOaACT7i0AIOnWgCX/AJZCgCPk9DQAmH7GgBdrfdb7rUAGQ33e
        BQAZXuMmgA69OlACpEJC2e1ABEcfP/c4oAmXAbrQA9iM9ahsCFw5fIPFK4E3O9MnJxVoBP4KYCLjHH3q
        AF6ff5oAPl/hGB6VDYBmlcBF+9VoBzdaYDS5XigBc55PegB6ncAlQ2A4DHGc0rgFFwCi4BTuZvcDg8Af
        NRcQYI+91ouA9XIGKVwFBJ5zTugDPuKLoBBIVcii6AcxLHNF0A0yFUce9FwHctg+1F0ANIQuOtFwGIOd
        /rRcCbzsjj71FwFJbblm3Z/houARsOeAvtRcBjkFePvetFwGoG2jJyaLoBeaLoA59qLlrYCfl60rlEVF
        wBiNvWi4ESckr2bnNWtgIjkk0wDIY7SxFACyLiNQDketAEchMYyT8rdqAGgjG0DC0ANddo2ig0WwxZCq
        4oKF800AHztyDQIjbO45OTQAm7ZyOd1AwAxwOaBEqZCigBABv+8R7UAObuc5HrQANwtADVcqoFAxd2eS
        etADHKBjkc0CGBFZ8jgUGi2HurY+Vhj60FEGD360CHH7lAyE5GXPRegoAMf3elAB5pj6c59KAE3bvl7U
        AATaxFACl9shGKAHg7qAF60CLEJTyxkZNAxxAc8cAdKBCA55ySfQ0EPclVig6YLdhQIXBXigQ9ZCoxQM
        XOeckn+7QZPcMbzggLjtQIUshQZHNQ2aLYaMY46UXGLvIGE4PeqQDWkyeAcUxiEkqPWgQ1cgUDHLn5vS
        gQ1ZNvbKD7w9aBi5Y8n9aAGmYx7sc59KAI1H7oUCJIs7BQA1pCGIoGJ5jH7vBHWgRIrblBHH1oGMbIbJ
        Py0CDg9OlADS0gPy9KAF81h160DHqQyglyPYUCEkDkcfd/vd6AI0BDcksfU0APzhm5oAarCMZbkHpQMU
        SsevWgB6zfKOzetACMJCc5oEJtkzjPNAD1wFG8ZNBDDPocCgkI/vtQBIkvlg470DJEICiobEAkw+O1K4
        E4ZCMkc0XAkUjHGAKLgSJtYYcg+gouAFfL+UkGi4DGQE5ouAx0QDnrRcBv2ePygy4DGi4FeUEEA8mi4A
        IWkZucAetWtgImK7cMMt3pgJkeWMcCg0Ww0sCqqy4H96gY8qAcIdw7UGb3GlX7UCH7yqqD1FADxN8zUA
        OQnaCxwD2oAcWycfwfwj0oAZhVZhIcMO696hsBCQU4G32pXAiOB98ZHarQD0B2jPJpgOJLKFXjHWgCIr
        t6cL70ARvIQx70DHIxZQc0CHc+tABz60AGT6ig0WwZPqKCiN5CrEUANYlsEnK+lADjjPHAoLWw3ekb5I
        5PWgoUgCT5elAgflX/CgYebjgUGb3DcG6feoEIpO/k5NAhzOQfagY5WXaNw5oM3uL8p+6MGgkfHkH5ut
        AD2G9jz0oAkhZCCrfx9ahvUBmQzDHSlcCRv9aaLgDdaLgOWQqMUXAqxvhQMVoA7OeaAJE5X7oA/vDrUs
        B8blTjduSlYBxJaQlThfSiwEo3Y55NFgAuRxRYzZIrptCIDvf75oEBIzx0oATqwxz9KAHy/Jh153elZv
        cB4bI29KQBu2cA0AOjl5oAkaUkkDlz90+lACBg3170AShoxH84z6UARbtx20ALt28UAFACZHrQA0kDJP
        3B973oArj3NaLYBd+KegDHJJz0+tAEcnTmgBifdoAY4wS360ARyS8cAhvXFUjRbEOWIyTzTGNOfm+lBo
        tiMf6sUDGLwTQAg4HNABQAUAPVsgL2oIZKo2jGRQIVugoEOOc0ANwep5WgBcp6GgBMd/4PSgBev3eBQA
        c0AJksdvpQMAu1iKBDmyCX7r0oGJgigBV6tQIYA3Y0DHYYdaAHr0qWIkVSIWbqM9KVgHFg+COmKpAFMA
        oAOO3DUARssm48/rUNAJgjr1osBIn3RVIA8wjimMGJIBNAhxHmEj+7QAm4gZH32+6fSpYEigKoxxSsA5
        vuUWAarlVApWQC7s8mmZvcepG3A+9QIac555NAAzkLjBoAapyOeKAAkHp96gCRQVUMTzQAoYtzQAj9Fz
        QA55NoC9/SgBqtkZzigBc+4oAM/7QoAM+4oAMr35NABu3EqBwKAJYl2KR29aAIznJ5oAjbrRY0WwmaLD
        HRlQfm5FFgGzorsSg4NKyAhUbRirQC5pgNH3moAjR2V+fu+lACTsrAEj5T92gBnzDqeaBjOSsoH+sONp
        9KC1sRM2Tj0oGSIuFwKAI3OxsjndQMjdSGwpwe9ADt3yrtUEUALuCPkABm9KAJfMK/IT0oAXHHtQIQEZ
        yfuD7w9aAD7v3xkdqADJPymgYxk3MV/u0ANznmgBx27BkZP0oLWxAcZ46UFCNIRgCgBxO45oAjbOetAC
        ElOf71AAVxwTs9CO9ABz6BfagAw56HigA5HU80AGCfu8HvQA9SNu8D7vAFAEivtGM+9ACq+98UASs2wB
        R2oM2DTFWBAzn0oETmgBo++aBEvWgh7iZHrQSGR6ipZotgyPWkUMkfBA61SADvY5HSmAnmbeP4/WgBfM
        bv1oAdGxY4P3aACQKHITrQBE4OOeTQIWLOwUDHc+1AEb70bKn71ACbtny/xetACKSXy3WgBx60BYKAsF
        AWEzQAqoCWNAhANoxQBKgO3gcUDGN940AJuTHIyR1NAhPlk6dB0oGG7dQAb9vDAkdqBEiFioyRmgYx3M
        ZMndeKAGvOWCg0Gb3FK7zj+7QIPmYfKCD3oAkXkfLwKAF59qloQ9elKwEqPhQKVkAvmU7ASwKrNudQF9
        e9FgJ32hj5ZyvbNFgCJBPKkZIAPNFgI5YsyN9cUWAhkTcMH+H1osBANxYsfu9qLAMnWaNgWOQapAAGC2
        KYEe7cQtBqtiWRccDnFAEaSbJE9PWgh7jlIZmO4igQigkcHIoAB940CJRwCQA/rn+GgA74BLUAOQYz2q
        WAwc0rAMYHcSeVqkMQuw+7wvamIepJHzdaAEcBxjOSv8JoAjbLLyu0+goAavCjNAEgBCg9BQMa3Unt60
        AJQWtgoKI3+8aAHLjaMfeoAY7lWIJ5oLWwgZD1GTQUSeaojABGPSgBi5lLbTt29Se9ADVYOMgcUGbHj7
        poERxA+lAEpdlZc/doAkfEzZHCjpQZvcaJGI6ZoESJkqD0oELg0DHr0qGhC7yBjbgf3hRYCRDlepPuaL
        ALtc9OlFgJFwFAYfN3osBW2bBx98/dNDYBuD8ilcCRTsUEc560XAs2tnJPkxgYXkk96LgQyKROwxz6Ci
        4EyN8o5FFwBz0ouAvm+U/HOaLgOOc0XAfkrGNhwT96i4DURlPy8CoZm9xzZzz1pCEoNFsLtwN1Ax6udo
        ZOD3oM3uO3B/nA60CE8wn1oAQbmbI4PrQBMAwHzHLetAC0ARvHuYmgCOQFRz930oAYDHj7v6UALgP04A
        6ZoAYx+YlwSO1WnoWtiJtwOWORTuUBYIuV6N2ouBEyOFCA8NzRcCJiSnJ56UXAiPJ2f3uaLgGSatbGi2
        GSnA54pjGKSBwN/qD2oAYTHnu3vQAhIHI4FABz1J+WgCVGj2jigBBjfxwKAJhnFQ2ZvcOfalcQc+1FwH
        qoIyTRcBrDBwKLgJyPSi4BzTuaLYSP77UXGO5qkBE8hVsUxjXkOBwaAJgSwBoANuPm71DYgBLc0XQx69
        KLmT3FMjQ8n7rUriDzMcAcUXAkVsqDRcBeF5yPzouApbcgNFwISrk8Hii4Ccj7x5ouAuHP3TxRdASJwo
        B+/3NFwHMTtGTzRcBq9KLgLh+xwKLgOj3A/Mcii4EhIJ+XpRcBKLgHQUXAKLgNAbecHii4DmHPzMQaLg
        HHrn60XAKLgFFwJFPyjpRcBeR0Af1z2ouAm6PG1eZv4WNFwGN1ouAN92i4DIygPI5ouBMHjPy7ePpRcB
        cbeF6UXAcmSfl4Pei4D5ZcqFAOKLgRsCDii4CMRtxkZouBFuQdRzRcAUjLEdKLgCEbDzRcCsw5NFwE2Z
        GaLgK2AmM0XAE+4QD85+6fSi4ERCyJgcMtWjRbEeSfvdaYxN3l8+tAxRsXgjJoEIcH7nHrQaLYjYjccd
        KCiNxyeOKAG0CJFGF6UALQMerlQM8rQZvcdvVhlRg0Eh8w+8cigAyO3AoAY5Bbjr60Gi2G4P3Sfvck0F
        CkuU3g42cAUARFSpwevWgBOO33vWgBUyCQTzQAxulADFzjrQAEN68UAOPC4PWgBq52jFAC7M0AGCOKAE
        L7TigCRMsoNAAHKuRQBOhySTxmgBYHKEjGKBDhId54qWyGTId2TSuSSQ8KaLgRknJwgPvRcYZb+4tFwD
        n2B9KLgBYjilcAyT3p3ATPuKLoBeT3FF0AZI64qkBG7kMRTAepJUHigBjSEMcUAJndzQWtiN1fccHAoG
        N3leDyaAJUbKigY7KDqOalsAYjbxwKVwIlcqWGKpCEHIzimAb8Hy+zUEMkWTzFwBhulBIFpYeN2VNBot
        hjA7jn7vpQMesaOoVvkRuRjv9aCGNcgsdq7R0xQSN4PT73egB0crZ2HnHegZIetAgoAjdjGxIG/d1B7U
        DFjfYcA7h60APaUk0AJ5xTnB+agBdrn7p4oEOR2RsHrQMmSUnNQ2Iem0LuI+Y0rgTIwZQRx7UXM3uKp5
        ai4hFTA3daLgL5jehouApHmrz1ouBWngdAFU/K3JouBA0zZ+c8dMUXNFsG/zeI+AOtFxjJSIyCvT2q0M
        QybvnJKe47/WmIVbpXUiRevQCgBiymFR15oGOWSSMnaeDQIQSKgwwy1AyRZRgED92PvD1oAUOVfcf8ig
        BWmZiSfumob1ATLPzGdo75OKVwF/HFO4EbqXYg9qLgNEp3dKpATbtw5AA/vd6YgHThtw9TQBG/zsQT92
        gYhnYrg/dFACNKqxrj/Vj7woERtIc80Gi2DOaBhkUDE8zHFADGO45oAcreWo96AGnYshBGTQArctn+Ds
        KAHQ4y2BgUAKcZoAkQ/KKAF3bjtoAY8hUbOwoM3uLG5VAKBDvnPIOAaBEiBsc8mgYvmEHHWobMnuPWU7
        RxSuIXzT6UXAeJHxxxRcBwyRk9aLgVd+09ST/d7U2BIrFhkgKfSiwEkKNIxTcArUWAmVpI1KI5G3riiw
        CIkkieahIK9c0tAHYjXjHz9zRoAg+/RoArYzx96jQB6ZC4JGaNAAOQ5FGgEu7PJqGZvcUSIvBGTSEJuD
        HjjPag0Ww5O9AxooM3uHmmLp3oEWIj+7FACONzbOzc0AOU/KO3agBjvhiKAHo2UBNAEMnMhxz9KAEMio
        uCDmgBqspGT0PQelADZCYxk8k1aWhotiHG3iqsMjd9rH+dFgImk+Y8UWAjYknNFgE8vdzRYBjI4Y4PFU
        jRbCSFVRfNGT2pjGdjQBGn3KAEkBAy/Kn7ooAI/uCgBVch+lAybOevFAiRTx1FSyGOXq1KxIig4osAuD
        RYBOaLAG3fx6UWATdnnIFFjRbDRIQzd6LDFjYlRVIY1x5jY/u0wHq2VB/nQAufcUAMYOWODxUsQq5AGS
        M0rDJE60WM3uPYb2I9KLEiZ3c0WAKLAGU7jJosAJIASB0osAnznnOPalZAKEJGWPNOwAVdehwO2aVkBI
        mdoz1p2AY4wc0WAev3RRYBc0WAOlFgJE+6KLALmiwCNj5cEk/wB3tRYBxPPIC+wosA0lTwPvUWAXkdTz
        RYCNvvGiwDo+hosAq9KLAKSB1OKLAJ5p+72FFgFA4osAuD6UtACjQBo+/TsBKOnaiwC5+lLQBN+KNAAs
        78A4A6Zo0AA7Nyx5o0AAiF8sOaNAHuseKNAIWAC/KOKdgIaLAK33aLARt9yiwEWDRYBOfaiwCP2qkaLY
        R/vGmMa8Q8l2zye1ADFPzflQAS80Gi2ICOaCg3OOuStACArvJYHB6CgCwMiFsnmgBH+9+AoARvu0GbGr
        0oFYlT7tADG5Y0BYSgtbB1R+9BRJt2gMaAGMvmHd60ARMMMRQA0rghqAElfDlh/FQA1RtJFACAgD5+R2
        oAUYX5n+b2oANwbleF96AEU5c85oAc2dx5oATco4KBj60APDvj5flHpQAvONxOTQAAk8seD90UASLIY1
        xKd3pQBKkr7R8ob3qWZsXMjc/d9qVhWHrnAyRmiwCmTbxmiwWD/bzzRYLB1G/uaLAAYtznmiwDW+8aBC
        Ept5HNAxYyNgxwPSiwA3BJYZHaqQDee55pgHGeuT/dNAB9QF9hQFhWXC7hzmg0WxDndzQMQH5zQAuR5h
        5oAeeq1LAc2BKS3IPSlYBkmd5ycmqQDfMKnnlfSmAxgCS6jr2oM2OWXKigQKcsTQaLYUn94aBko6UGbG
        P940CsNzn7pAPfmgAypxzsHbHegAdX+Xjb7UAKXK8HrQMUshTkc0CGrjHHSgA+Ynhhj60AG8rwTzQBIs
        jFRs60AClwxeQ528UASAKG4YgVLESiULwDn3pWAkSQg5wcUWIe49jk5osSKjuDwePrRYB5lOeTk0WAaJ
        Tv8AeloAjl5ZDGDw1GgFeS1Z5D8pY+wzT0NFsQOphbAHWixQEbUxVgID5cY96AECeWuc0AMZtzZoATzN
        vFACiZe/JoAes3Ax0oAXzTQAnmnNS0AecvcEmlYBdjSfMg3A9m7UWEI7mMBd27HeiwDi27mqQwpgIXKj
        2HegBQykZK5P0oAjfG44HFAWInHzGgLC7gyqoGD60FrYR1KsQTk0FDelABkpyOc0AGADjfg+goAYw54O
        R6mgBOfUUAPVyBigBTLj/wDXQAZ3c0ASJ90UACviZRQA4nJJoM2PUjaOaBC5X+LkdqAFSQxE9yfSgByA
        7MD75+6fSpZk9xrPhsAUrCFSXBosBPndzRYCRDGF+Z2B9BRYCvyB6UXRsI3IXvRcRIv3qLgSB3D8HApX
        AfJLIg65zUPcBiuyjB60hkyHctBk9xc0CBerUAORtiA0AODmQbvWgB6njrQAv3B5meVoAM559eaADNAC
        g7vloAN2zj+tBm9x0bZOaBBI+HOOaAG8nnFACkEJk/d9KDRbDRIoGEGDQMMnq3X1oAYz88cigZG+9hkH
        FWnoIhwR1607gKRldn96i4EbHKUXAhOadzRbCHd2P60rooBn1FO6AbMCVHei4iJ5NoxVIY1UVwGZiE/i
        HrTEHT5c5HY0AKRhcDnHpQAxA+eDgUATiPPJPNAxFXD1LETDOKVxj16UXENZiDSuMTJPencAwaLoBkm0
        dRk0XELH9wY4FFxjTzKnfii4hAOKLgLJ/q1ouA1ui0XAlXOOtFxkcoJI70XESDOBRcYuCaLoB69KLiGt
        nNFxjl+6M0XMnuKyjarKPmpXEDEnlutFwA8gY5+lFwF2PIxCYf1B/houAqKIzjdu96LgSMcHLnK9hRcB
        KLgHydxk/Si4CsVC8jj+EelFwGElFXPJNFwHkYOKLgPU/KKLgMb7xouAmMc0XAM7uaLgFFwCi4D1AVQ2
        aLgMkZWwSMmi4EgIwMdKLgBl28UXAmjZGQ7iQe4qGBCJMDC8rSAUHdzVp6AC8FqdwBRxUMCxEkckRDtg
        jtSAjAEnAOQvTNAAE3NuPFADnGBigCLBx0oATDnoePrVp6AREESHPWncBW60XAif7xouAH7lO5otiJRv
        LZ4xRcYiksM0XGLzRdAMbrzRcRE/3qLgO6Rii5otiPNFyg2Pjcp4qkBG5LMS3WmA7+BaAJweKAGN941L
        AbSuAE+XyP4qLgLt2j2ouAE5UUXAYmS2FOGouA9g6n94c0XATcDwOBRcBjLhiBRcBNgPfn60XAiYbZCK
        pAEnJFMCN8iUlj8tAD0RXbK96AGyqVc5+7QWthpCjlRg0FC5JGW60Gb3EOOww3rQIeGZRg9aAFDZ7igC
        VQdtAAmA2WGRQBP5ihV2DC+lSwJCd3NK4DR9+i4hwG9mz2ouMauWGVGD3ouApRwdwOF9KLgGdw4HzUrm
        b3FwR1607kj1zt60XRothjjad1FyholbqeV9KLgIJowx4ouAsjBiCOlFwHNytFwImfC43EewqkBCZMHu
        aYBnPNABQAedj5DwKAHq+wY6UAOzmpYDGGGyOppXAbkvyvB71SEIWXPBApjFEmOBz+NAATnmgB6vhRUs
        BrHJzSuAmUH3hz9KpAICCxI4ApgSiTzfmPU0ALvI4oEG7PNAw57/AHaBDHABLCgY3O4ZoAer4AFAEkbD
        OW5B6UCHs7Kx3HK1DZD3EjxK7EDAHrRcksJcF4gh6LRcYqOZAAaLoBSu3ii4h4+4tFwLKoIozM3PZRWb
        3AjRhbLyCWbk0gF+0yI6NACGA5pdQKs27zGyeTya6IjIZI3YZ4UH+LNJvUtbDFG0Y3bj6mlcoSTkHvjr
        VIRASU5xTAQMZBu9aBksSAg5OCaAEChhjP3aABWyxNADmPO/+7wKDN7joxhv1oEPeQqu4c7OKlsBEK7R
        uHJ56UriAorHI4HpRc0WxG7bGIouUKsh8pkJ+VjnFFwHmfP3enSlcAB3c07gRuRuNFwImVyxKnii4AmR
        kHrRcBCN6YJ6VSAPOKRjHU0wI8bfmz1oATzC/B4oAGG0ADmgAw5k4PFAEuVHDjLd6AGMGYkpnbQA5HKq
        AeT9aAJIzuOaAHnk8c/SgCJ+WNAD1I2jHDUAPQmMgk5JoAez7DgGobM3uHmmlckRTl807gS4Y9OlK6GP
        WQouCefrTugICCDy24UWEPQjPHAoAmoADyq4oAl6AVm9wCkAj5YLsOCOtBDHFgxwOlBI9QFXFAEiqCM5
        oAdgjigBo+8aAJCVDDdyKAHvtZ/kHHpQAgTcM0AB/dfjQAjxDA5oM2KRg49KBBlO5INAEiIZFwh/E0AJ
        JG0a7W5IoNFsQHNAwbOzk5WgBqkY44HpQA1utWrWAib7xp6AJTsBG3LGiwDJOBzQaLYhBTuMn6UDA47c
        CgYjTeUvHeiwWIm5AqkFhz9KYWGL0oCwDJb5eD3oAe2CTtHFADl+6KAsSKeOoqWA7n1pWAOfWiwB8/Y8
        UWEJx/FyaLDEaTAAGcCiwDixPOaLARs25iuc0WAeo2rjNFgGySEDFFgsNQlgOOtAWDNAWAHBOeKAsIHK
        jHNAWJUJZQaLAL8x+7we9FkAm/HAHFFgJFOVBoEOP3KLEMTfiMCixIitvGMUWAcH8gkDJzRYBYyq42j5
        j96loBIyxMxGMBfWjQBBGJ+RwBRoAYo0AN+3inYA3Z5osAUWAKLAFLQCRPuijQBjfeNGgCUaADDIHejQ
        BW60aAIIwxyDkn+GjQBdrDqMD0FGgCcHp0o0ABj+IZHajQCSIhAcEtIe3aoe4EbM0bFWGCOwpDJEbco7
        mrVrCB+cU9AJVzgVDAY33qQE0eCgAHzUDGShgRuORQIUvz8oOKBkb+Ywzn5fSgBq/dFWrWENk6U9AGL0
        o0AY/wB40aARtnPFOxotiOcHaKLDHJnaKLDFyfUUWAilYsQtFgBkycZ4XpQFiNm3Emg0WwgKZywyg+8P
        WgYGUxdB1qkBGw+amABiOACfpQA9clQcUATAHyxxUsCPo60gEFABjngkn+7QALksflx7CgBW2jkfe9aA
        ImJY5PJoASgCRPuigBrIrE44agBMKvDDLetUgI2+8ccCmBGwDMd4yBQA6OVVBlXgLwBQAqSKVJcjnoKD
        RbELAgDd1oGKRvOPSgze4CXH3uR2oEKCSMnk0APVo8Yx8/rQBIs5QBeuaAFKOvAOBQA+PIPJ5qWA5nw2
        KQEiHKg0AOoAeudo9KAGNgnj73rQA5cgckZosZsax5NArCHI5P3aDRbCOd2ABgUDHEAHAOaAI2KbjkZN
        ADSR24FABvxQApk2pu71SAhA81t570wFYAHGaAEyPWgBjZycDf8AXtQAsY3nrkDuaAHk7jmpYCEHoOJD
        90+lIBWI2cGqQEDFMnIyfWmAkRBkOOlAE0pBoASN8IBUsCeJBMDkgY9aQDHOF5qkBEc5pgIXxwAd3rQA
        5JWztagB7YBoATfjigBr5YZxQAkTlOv3aAJGYMS6j7vAFADQ+x8UATA7hmpZmyRZVQYIOaQrC+bn7ucf
        SgB6uXGD2oAFlJfPJP8AdIosFiRZTu5G32FFgsTPPJIgQdFrN7iEaV2C7fvD71IZagvEgDBh87j5D6Uu
        oilcMGckd63iBXk+4tD3NFsRNjPHX1pFAjmAlzkqfvY71SERsSVyeppjIS0g6dKAHqx27z95eKAFxj+d
        ABmgCRPuigze4tAh6zIq4PWpYWATAvxwKQWY8tuOaDRbETkBjzQMiYjd1oAchG0c0AOWUxk45z6UAA2g
        fMOfpQAyQE/dOF9KAGhSEBJy1AEe4tzmqQCr1NMBmDkfWgB8igtmgBo4agBWABLZoAAxYZoAlRvLQn+9
        QAxAFXFADuv3Tg96AJIzkHy+PX3oAjYjJxwKACgCRPuigAIO4VLM2S5w9IVhxIzQFhyn5eoosFhryKrY
        K5PriiwDVJZskUXEShcDdRcBxbcoNFwBH2wsKVwJi25VPtUMB7n5aQEOCeccUASIeU/GgAHSgCRcFQB9
        71oAlXIXk80EPcXnGc0Ei4NBoth6527lOCvWgYF9sbhRx1oIe4u4dX7jigkMHvyaAFQdaAG9OvFAAd6c
        g8elACmZinzdaAIycrmgBq9OtADD/rTQAr/doNFsQnjrQMZI5UYq09BjFfChqdwIZGZ3LH7pouA5Txxw
        KdwGPndknK0XLWxG+NxxwKLlCKQCeaLgIOlFwDds6dWouAEBOM0XAkQ/KKLgA+/RcBcrvORn3ouZslC4
        G4cr6Urkh1+f+E9qdwGsd2G/h9KLgPPJ+XgUXGNIMXz92ouA1zx70XERx/eouBMPrRdGi2Gt1ouUN+fl
        wfu9KLgI6lQuevWi4C9Og3+oPai4D14UYbI96LoB3PqKLozYc0XQgwaLoAw5PFF0ADOOTRdABYilcB4P
        lKH7tTuAtFxB8xHygL/tVm9wHKrDbubefWkBLKGT51P3qAIw7KME80DGsdzE1aeghKq4D1k2rjNFxjgS
        3NFxCt9ys3uAwgbV+Yj2pAPOM4XJb1oAT5Rw4y3egA34+6DigYbd3J7+tAg3FPlH3/4T6UABnMfIH3qA
        DGKABW2EkfxUDFjPld+aAHF2dmbZkHoT3oAjB2jhcOetAEqjYoDHmgQpcrxigYA569aAJI1YAsp4oERk
        k8t1oAk80xxjbzn0oGR4oEKwO3pQAwZAGT8vpQMilO2QlejUAMI28UCEU/NVp6AE3WquBGoOKLjIz/rD
        RcQp60XNFsFFyiNh8xouARnDUXAJPvmi4DaLgRGSSOU7eh9KLgS7ZPX9aLgIXdeM0XAUEnr1ouAHii4A
        W8vn+9RcA8zyeBzmi4C5TZyMmi4EW/HQcUXQCbkPUc0XAkUjbxwKLmi2GP8AeNFxib8cUXQDGJY5ougG
        H+L6UXAjSNWHBy/pRcB20H5ZECle4ouAEhl4JI9+tFwGqhC+Yx+VegouA5gqrhenWi4DVOFHai4Du+PW
        i4DkfacUXAe8vFFwFiOQDRcze5I42nd3ouIVZePSi4EsUuAaLoBRIw6/d9KLgL5ufujilcABzzTuAtFw
        EK7zg8baLgRtJ8x5JP8AdNFwBZGycrj2FFwGhy42kbR60XAYwAbAbd70XATeV4xRdAGc0XAM46n5fTNF
        wHGMMmR0oui1sQ429CMUXRQm7d8pouAZ2cZ6UXAekuDRcAmm6t/d4FFwIc/rzVIBDkck/LTAVAMll71D
        YDFl+f0PvRdASGYoQRyTRcCSRwGwB83rRcBMGT73VapbAIuS2cUwFZyCfQUAG4nvj60APVkCjd1oAaxB
        PynigB0cm0EUGb3GkljmgQ0u2cLwR1oAUHd049qAF37SAWIPoKlgWc55zmlcByylRilcB2Q3JYg+lO4D
        o5Np3BixTjBouBI2Sc4C55xRdAOWUxDjvWb3M3uAbY+aQh7OXGQN5PUHtQIgKA/xZ9zQMa+AMVaeha2I
        W+7VXKE42DLke1FwIu+Ac0XAa/SqRothiuQKYyRW+UE8UGb3Gnk8HigQ5W2DPWgBrOZDu9aBDlPHJFS2
        arYFbc5HZaVxkom3DNFzN7jiEZMsOaLiI2jUrxwPSi5otiHbt44ouhjkcqcEAD+9RcB7SHPdh6mi6ATO
        7mi4DZMEY5RvUd6LgQkEfeABouA9TxwRRdADuQB3AougGudzE0XASi4BRcBy8xOBzzRcBxPoR0ougDPu
        KLoze4DJ70XQhokw5HWqQEwAcZJ5pgBGOKlgPjcqcYpXAe28nIOAaLgJuLfKf4e9FwE8zfyeKLgSoRtH
        NFxDvMxx/Wi4x4yByeaLGQZ9xRYA3ke9LQBckjNGgEuD5YqHuIaAQOfu+lICWKbgqBhaBjHHTvQIkHSg
        CRD8ooAXNBDE8zaeeYx94etBIeYw6ig1WxPEdyA0AP3kdqCHuJnPNBIu/HFAxpkYsNnBHWgCSZluAFUH
        K0BYbu8n/WcntQIjZmckk8mgYH7ooERL1agBF6UAMd8MaDVbCbh1bnPSgZDMzqSG5WrVrCI1O5QRwp6U
        9Bi8jvTsBG0LzE7DjbyaLBYTI9aDRbDJCPWgZB1NAEi8KKAGsMEsKAGhgeX6HpQBIikKCeTQBKjoVG4c
        0ASgjaMHAosZvcCWTlWHzUWFYXaV4JyaWgBg0aAHPqKNADn1o0AY8Xzb/WjQBtPQLC0Gi2CgY0f6ygBZ
        CWIWgBSu04HNACE468UAIPv0GbJRnFFhWF+bsaLILApKEnqWpaBYTbtjce9PQQpYscf3RRoMeh85cnjH
        rRoAu7IzS0ASoe4g+fscD60gFDleDyaBhkk5J+X0zQA5MHOBxVq1hDcYqtAEX71GgE3H94j2FGgCfwvj
        JrN7gDyY2gc0hjjuaVNvBxQA0BgPmOWoELh+xwKADp9/n0oAEBYsGOMdKBiBuMuOD0oAUA9SDn+8elAg
        J55IP04oAPKH388mgCRVeTZlvkUHHNAEKl2ckHAzQMew3nDHpQIN5XazdPSgY8yrJKWB4NAA8pjR8c7j
        QA6Ufu1oEOUNtG3KnvnigBrK2S6fd9KAG+aw69aBkch3EGgQp60AMePcM0AQbSDgVatYYEEdaegAclBt
        PPf3o0ERtgrwOKegCCJmjBBx7UaGi2BVKrg0aDuKCMNz2oGQigBcUAJQAFtncHPYDmgA2hOMEexNAEb/
        AHjQA9CNoA+9QArAgDPWgBj8se9ADcH0oAkUmMDjlqAHbccdaAI2B3HigB8ceVJORQWtiMjBwOaChKAG
        MCTxQALwWzQBEVdj8nWiwERSUSEE80WAeoO7nqfkoAdJgEbgSBxQAkm042DC0ARzHkUASDpgH94fun0o
        sBIhyBg0WAXn1oADuj5PIbp7UGb3EDeU+2T5j2xQIlyT1OTQA4HG3mgCVjmVcc8dqACOTaaNAJC245oA
        aX2HI60AKH8z5u9ADG6mgBvmY4zQBGzZYmgBMjt971oAFBDc9aAsK7bGJHegCNgik71LemBQA5T5YBBJ
        J/hosaLYSWMeW+QF9hQMhOBxmgAoAKAHqm4e9FgGtsVsEc1SARkVlyOBTAap8scdalgNaRZCSVO/ucUg
        CMjPUUATiQgYCgj1osgF3knZjAbmqQBl25zx0pgB+Ujd90feB70ARS5yM9aAAtk7e1AD0G04oAdJ1FBm
        9xTnr2oEN6Mc0AOaQA4AO71oAcuQu4n5qlgL5uaVgHxncc0APZyDigBY5eaAHtLzQAglJ6fpWbM3uSI5
        B6EUhE6NncTQFiJkBOc0BYjbGcL971rRbGi2E8vJ+Y/NTGQzRDJoArlinyj7/wDCfSgLClgyAiqRothF
        B2imMjkyGyx+Wgze45ZABhelAhXywUr170AI5BY4oAjA3uR021LNFsTJJuyCaQxybVUAfe9aDN7jg5HB
        5P1osIcTuSg0WxE/C88UDGF9yqP7tADjOzHJ+6e1FgGiYbvl6UWAmB3DNAEMvegBkUqqCNgLetADUmLv
        5Z4Dc0ASE5P6UAMftQA40AOE4iAC/eP3qLAI2CcqMCgBUKBuRzQZsc7BCSvQ0CI3ABwPvetUgFQ88nJp
        gT1LAMP2OBSAkRWZfnIIFACtIAmV/i7UARExqcHk0ASRMmCT90/dFAAMgYJ5oAmB3Y96LgBjDc0XAkUE
        KBms3uZskUZATP3utIQfOehwPrQIOe5yaABQwfJ+7QBMs0akjGKAEGSM4wvYUALx1HAoAKAHR4By3I7U
        ASMGzljke1ADTJg4A4oGOSYk4xgUAPd9rEUAAJIzQAvNACGVo/unBoAYXaQ7n+8etAhKACgCN/vGgB0f
        ANAEDvhiKBg33N2etAELuV2sTlT2oAc8ioMHlf4cUCGqSRkkZrRbGi2GeaYmbHOadyiI9TRcCNpCpI2Z
        HrRcB0LZLEjb7UXAazbnK0XAbgLxnii4Bii4D1cqMUXAljTedx70XAcx+YpRcBAu1yKLgSDhqze5m9yR
        +lIkjUrjBHNAxykZbHHtQIQA4oNFsNb7xoKErRPQBKdwDAHzZFFwANuGaLgJ5m1yKLgNcea5z2ouBLGx
        KDJxRdAPwaLoBPxFZvcBefWkAc+tBmxADuNBI9+lAEa5xk8rQMXeAfl6UAHmqOqkmgCWJgQSOBQIRSgb
        kc0AOdih3KcL2oGN3F/mbqaBC0APQjaAPvUAOLGPqclqAAgLwOGoAQsY+pyTQMXAX6UCDI9aADNAAB5n
        H92gBGcyBR2oGKzbDgUAG5CMsOfpQIMjqOBQAp5QUAQnrQA6MgH5uR2oAkJUN8xLP6UANCBnzgL7UASj
        C8ZoAT55XEan5TzQBO0hdQWPzdKBkJcqcYoAUNu570ARt940CE7470AKT8tAERXb81AAZFdAGH40AQnC
        ZZf4OgoGKFPb60AMbhjmgQ3Jb5e1AxcIvBGT9KtPQtbDX5AIHFVcoUtk7e1FwI2G1iKLgJRcBGIwOaLg
        NfljRcBOccgAf3qLgOTbjh959DRc0Ww7OewB9BRcYqShS27kdqLmb3EjY/M5PzL2ouIenyrg9etFwGsH
        LHaePrRcBvmsDtY5AouAuFX94pJK9FouA05k3ZAXHOKLmi2K+WPOcfjSuhjGhdjnNFwHK0sKgdAf4h1p
        3Aay7TuLbvc0XQCeaT249R1ouAxg7HIYkepouA3ey8HrRdAMc7iKLgSDhkzxx3ouAxZMMRRcCZpMhdo+
        b1ougHeYx68n1FK4CYP36dwJoWyATxRcCRim45HNFwJPNQRhUG1h1rN7mb3EU7gCBSESqUCjcOaAF3xj
        58crxQBG5EbZXo1aJ6AJjb1Py07gRvjcSOlFzRbAM44UEetFxiH3GPai4BvxxRdAMYlm9z2ougHiTbGB
        RcCPdnnIougI2B3ZJBWi4CPg42jii4AW3Hb2ouAu3bxRcBvmBXIAw3rRcBQS0hJ5NFwB+Uei4B0fnjp/
        Ki4CT5K/KcHvRcCsMEcdKLgWIv8AVii4D95HHalcB6BiokB/d/xCncBhJJJk+Y9vai4DAcPyRRcB5OTR
        cBjPhgKLgT5Lc5ouAbjny/71FwDcpOXB2jhh6+lFwI3cqxA6dqVwHKcqDkCncB3PrRdAPilMTN70XM3u
        TDHljFFxEQ+/RcCyjIFGRzRcA3qrZQYNFwJQ7OMseaLoBsiuw2g8NzWb3EN5EY3daQDY+tWnoMcwCndm
        quBDKd+T1ouaLYrnNFxhz6ii6AR3I2jrRdANfEjnfyD0ouA0xeT1IzRdAAlB/iP4UrgKDnnOadwDKdxk
        0XAilfBG0cUXAejA5zRcCMs4PHSlcB0byetFwJCTMSrdqd0AUXAGOF3d14ouAi8Ci4CCZkcjqtFwJhNH
        J1FK4Ctbqy5BAH1p3ArPH5bHHNF0A5GyoJouAuR60XAkt3jV38zv0ouAwsmTx83rSuA9Qdop3QDW60XA
        bwDk/c/iHrSuA9F3rg07gNaLy2JHP0ouA9C7OhBx1ouZvcAxXg9c0riJFOVBNO4DGfB4pXANm/n1ouWt
        iSNdgJp3RQLK2PuZ96Lmb3LCy7V3d04oESoflHI55oAdzWb3M2NH3qQrEx468UBYRSN3WgLDnDljg8fW
        gLDVXc58znHSgLCmZmYqecd6ADzD93HHrQBIowozQBIhBUc0BYXzdpxkUAKG3c5oATzAvDcjtQFgbLBS
        eTQArOV+goDUTzaAD/W9e1AC5J68fWgBASWI7etADiACQOfpQFiJ/vGgLEcj4GKAGKdwzQFhrZzwaAI5
        Oh9aAsNH+rFAAP8AVitFsWthF4UZ4plDW5JxzRoBG/K0aARjpRoFh3l7/unB70aAG0PwOAtGgCeYfSlo
        A+PLHOKYE46UAIOHoAOvmY56UASuRheaze5mxT9aQgK7fm70ARsxZskAe/egByfdGGyPU0Gi2GsrA7ga
        BibiRljzVrYBkrbBx3qtAGKAoxmgAYs4CqcUASjagCtzIOpoAXPvQAgG9yP7tACtKSelACKcvk8Vm9wH
        M5B4FIB6ElQelBmxjM27CZBHU+tAhynIyeF9KAHcHlelACD7xoAc2c8UAN3EcUAMaQ5PFADwR5YLjOel
        AWEDFRg0ATRMCCc0AAwRx96gBGfaFH8Q70AKSSfm60CDrQAZydtAwK7eKBBQAYz1JT0I70DJFJxlgAPQ
        UBYXKnp0oCwc9z8vagLEbgFtgGA3NAE0LfIST7UAROPmNAWG8dBw1AD0yFGetADqBEbD5jQBPbEx4PrQ
        Mluk2kEc/SgQwEsM0ARufLbP96gYFcLigLDkZPKCgfvj90+lAELnYxI79aAEICqMHJ/u0BYjYPKu3hQO
        1ADVAVRuBJ9aAsGFPRiB6UBYY0YJznPvQFhyjauMigBrHnrVrY0Wwm8qcAkn+72qhkcpJIJG0+lACAZc
        0AKybmo0APkXgjmgCNnwx2jiiwDSc8nigBQTjhQR60tDRbD1ZNo3/IfbvT0GNfliQMD0FGhmxUG07u9G
        giQAOSxOM0aANA2jFGgCpGJS3I4o0AaDRoAxuWo0NFsRsiE5IOaNBhtwPl4WjQBN5BxRoAxzuGaNAGKp
        Cgrwe9LQBrTF22gHH0pgIxAXrigBFyV+7gf3hRYBjDzGK5JC9zRZAJt2/NRoBIJSYxt4PeloA+NmCApw
        G7UaAO27eC5z7UaASKoVQzfMD0o0AFkbdzkmnoBJuzyaze5m9x8cu04pCJGO45oAQkDrxQAVatYAz/sg
        +9VoAxs7jn7voKNDRbCb9vAGBS0GISTzT0AM5o0AaActj75+6fSloAwcDJ+7T0Aa5jx0paANXG3jpT0A
        CSnI/io0AXG3ijQAzQBEx+Y5Py0AOTDHglB2x3o0AcXKyEFdvtRoAOBK43f6v+IetGgCXUBgIYnIPb2o
        0AgYAH5fu0ATREbByKAGvI0TZ6qfSiwD1kcgLEdq9896LAJIDj5eD3PrRYBimPaPl/SgCRCpXjpQAyVu
        d4OStADkOxsglj120WAm89mGSoQeoosAKctkEt7miwCSD5zQBG/agCVSCBt+960WAUbu55oM3uNEhjfj
        nPpQIs7SqKxPB7UAPLBvmHANADfMx0P60BYlRsqDmgBfMIOBWb3ATd53yk42+tIBRWi2AMqPvDIpgRzs
        FClOh7UaGi2GPF8vWjQZVYbSR6UaANJI+fuvFGgCMMMvvzQA665Mf0oAjiIEYycdev1oAkzQAZoATI9a
        AIJf9YaLAKkjqANoZaAJlYFQcbfagA3D1FAC5oAKAI+dzbAGP8We30oAdGVCjB496AHDnpzQAUAGaAI2
        O5iO1AEJbZKV9KNABjk5o0AerkKBRoBLGzuyAHjmjQBQNnykjIo0AXPGe1GgDQ+HwOhoAcx8o7QcgelG
        gCFgw4+960Gb3HpkHk80CHN97JOV9KAE8wZwvSiwC+YaLGi2DJPNFhiF8cbiPoKDNliMEdetZvcHuSnl
        lpCJ0UPI2X20ABiEPLfMP4aAJImWUFZByO5oAi4Mhx0oAlxQISgYKSzbV49aDN7iurBvlOFoJHoWIAc5
        Ws2aLYUBQxxwKQxzIGOeOaBibccYoEFAEsDLu2v8q+ooAfOIyxjjYsjc5NAEaMhXkZPSgZIxUxqFGDQI
        bgySqrH7vegCFmKsQfu+lAAsvLYXavrQBESGPB3e9ACkfJQA0A4+U4PetFsMY74Y7elMCPOWY0AIAfLo
        AaG2LnvQA1mLncehoAGl8tRtHBoNFsNXpQMY5+Y0AJQAqHrQAgoAesvlKMc5oM3uLvxQIkUkqCT8vpQA
        773+r4HegByNHnpQBIyiRjjgDpQBEwdjkHigA+UfeGW7mgBcjDY4GKAGJwtADJeooNFsBZM8jJoGRvjc
        cDArRPQze45fuincQ1mIYgAn6VmwFQ5PPH1pAPbk0APT7ooAH7UASr0AyPpQAvPqKAI2Vix+cj6UAIoI
        LZOT6mgBAxUYxQBIpJUHpQA4ZPegABJ6EUAHJ70AHPrQBGwO7nlaAHrgjjgelAh69OaBjkG8tz0oM2IG
        yMmgQvmAcD73rQAgJL5brQIcz4YigYjHIU0CHLyzYoNFsNVW6kErQUISueOB6GgCUOrRhR95e9AEe4vy
        3Ws3uA4Oo2owyrc0hEjursSvC9s1othkT/eNMBR/DQZskcjd1oJEoATfjpQMf5vyrWb3AeZSTSERswJJ
        bkdqDRbCJwTk/jQUIOQKBCOMg0DG/wDLMVotgGqDjn7vpTAcXDLtHAoAiMLdmwKAEwV4LCgBrFc8jJ9c
        UANIDnA4C9BQAZduQcD60ANcEj1PtQBGHIGKAAOHbb0b1NADjkHaTnHegBCAvFaJ6Gi2GMVBJYZWncY0
        lf4Rhaze4AGTuMmkBIpAHHA9KAGsCSTg49aAFLZRVPAoAl8oAHmgCOJdoIoAmto0kMm4chDQBWbGeOBi
        gBKAFLZXbQBEQUy39zigBjDaf1oASgBFkKzr7CtE9AIZXQyEsMr/ABD1p3AFdwBtPHalcBku5yqg4Lct
        RcAYhjx06VD3ASkA9JNpxQBKrgvnIoAeQxOVPB96AELsnDA/WgB6NuUHIoAcV2/N3oAekuVFADgQeW5z
        0FAAchOTzQA0dKAJI3ROSOaAEkcSOWHQ0AIc7Ofu+lAEa43HAwD0oATD7B83y9hmgBqlQPm5HagBrSBT
        hgSfWgA3BuRwKADNAEc/QUANEq/cIJx7VaegDGwWO3pVXAdHOIwdv3vWs3uBJHKZFBYjcaQDipX5ieD0
        9qAIyDIxDn5u9AEc+YgFPKirT0ATeoAKDBaquAZMfB5ougHGXCrnii6AkbfONucAUXATBEYz1ouBEQD1
        Oz0I70XAQff5AX2FFwJBL5bnHei4C4bzCQeKLgTxyFTgnJougHltxJyKLoBmzLMSRtNFwGhwnC9KVwEL
        BvvNs9CO9FwJFkwOcL7CncBfM96VwJEYuMH7tFwF/drwB+lO4AQx5XhaLgOjkKHBPNZvcze48qHk3HvS
        ES8KMZoAF6tQBGetBotiOQdKBiGMOdvZuTQBBJjefbigBmN/4VonoA2SX7ntmndAVQPNIz2NK4Ejy/NT
        ugE8w+lF0Amc80XAKLgL5hHGMD+9RcADb+Mkj1NF0A9QEXDcjtRcBcjp/FRcBSWj68lqLgDJuTH93mi6
        Ai37+DxRdASRoyggHAougHxn5Bk5NFwEJAduaLgOj+6KLgNcKxOCA31rN7gRMpDEdT7UgE3FeMGgCxEd
        0YNACbYy7ZHNAAi7VH9z0oAR/mY+Xx61aegD1xtGBgVVwFYjbRcBqfdouAuR7UXAkGcAEBR/e70rgGfR
        s+5p3QC5PqKLoA59RRdATxtk7egrN7mbJVAV8ZpCHsSxIwcL0oAaJJJvl6BfWgCVNxUZPNAABtYtQA5w
        5XeD1oAapZhknmgB8f3vegze4T8sDQKw6OQjPFZvc0Ww1HLNg8Uhk4ULw3zDtQAnmFeCaAFB3c0AFABl
        MfN8vuO9AAZMHgbfYUAHztyDxQAm8jg8mgBd2eaAI2zuJPK0ADFSny8GgBhkZVUHk0AI5LNmtFsA0uVp
        gNJ3HNADSH7HA+tADJM45OTQAxelADmG9ME420Gi2IS2eaBjDkng0AKCABkjNACMcHqB9aAFQknaaAHs
        NrEUGbHp90UCFzQA7zvlVPSgB3/LSgBwO5mXcRQA5F2qADmgB3PrQBFKDkUABjyc0ARtgMRmg0WwJbtJ
        lwcDtQMiJLRyE8nPNWtjNgRnpVaCHxt5ak9M1mwBZUcbmHJpALkHp0oAC+OKAJE5UGgAHDF+60AOIwf1
        oAaWcHCnigCRCxUZPNADufUUAMbrQA3BP3eD3oAQnZyvRqAJFG1QMigBG60AMD4fFAEitlsmgB5yTwaA
        FU8UGbEm+6tAhU+6KAFzQAtAWEoABgtydg7Ed6C1sTJM0RJI49BQURl45fnYYJ9aAEIA6dKAEBz05rN7
        gKwOFGOaQCzfdAq1sAlUAYoM2HegVgwRy33aAJFIwMcCgLAv3s1m9wHMCT8vB70hDwVMY28EdaDRbDTE
        si4UYVuaCgjdYkG7kL83HtQAnmLIzOOA3OKAIT1q1sApACbs1QEWS3NACZLHaaAGNCAx5oAeqkKADQAw
        7fMORk/SgAZFY5HAoAYMB8FtnpjvQAS53nIx7UAQP940APTG2gBsnUVatY0WwkgyQnZuTVaDFZk28jkc
        Vm9wGKVz8owfWkA9oyTlutADwqhABISf7vagCNxjG9T7CgCQAgc9aAHJ96gCQS7WZv7vAoAr5+dyAHz1
        B7UARgYHBz7mgA6sPrQAku4yEg/ux94etAEThsYbk0ANXpQA08O1WrWAgbg1WgBvK8YNLQBN27n1o0AO
        +O9Q9wCkAUAAKBuRzQBZV1RdxGR2HpQAod5Pv9KAE2Kj5XpQBMGLjOaAEH3jQBMv30oAQDr9aACgAAyc
        Dk0AFABmgBr8jA++fun0oAgzuJUD5/4T/OgBdoXgUADSELigBsbZyelACIfmoACPMd/agBgLMMjg981a
        tYCOVFcg52DtjvT0AUqdxG3GOwqGA1cFuPvetICyhwoBIzQA15UU4x83rQBDIxkIGMj2q1awAy7Tiq0A
        AcfeGR2o0AApk4PJFGgAshy1GgCLMrDa27P0paAAwH46e9PQBzcsaNAEyY+f71GgBt2nFLQCSLoaNAJo
        FQqCMBu5PejQBzhd5CDinoA3Kdxk/SjQCNmjLHj9KNAHxNEAdwyD0o0AF6UaAPWRojwDzRoA5nIPFLQA
        yTzmjQBAfmNQ9zN7kyY+YsMjtSEOgwVIkIOPu0AKvmMM5/WgBeR1PNBotg3Z47UDIZ/3fTkH0oAgZdqY
        oAiaXauMgVatYCMncmarQBoBxRoAu3fx6UaACtmRDRoAp+5+dGgDB0oAXtntRoAUaALvK8YpaAGSwyRg
        f3qegCbXP3WJHvRoBIm4KNxyKNAHtGvkuxGQego0AhPXltzf3aNAEIfrwo9M0tAHRhgW48w989qdgCIg
        /KWKgdD60WAmaJM/Moz7Vm9wIXUwtuQgBu1IBvmt90/nQBLEGwcGgAUYGc5NAApkd+MgUASKpR8GrVrA
        OYjdjPNVoBEfvk9vWloAMdhyOd1PQB6qMYfkD7tGgDgS3Xk0aAGUH3hz9KNADIPTpRoAYpaAWG6LWYFg
        NHsXj5vWgBZHcAYPAoANx8zLHmgCUOR0rN7mbJRH+7Ejf6r+IUhC/wDLIenagBFUSKAB83rQAySM25zn
        JNADkbcNtAhclOMUDDOT70ASKGxxwO9ADGKljt4FADlk2jFAC793BNADHVwxCnA+tABGDznk0AOQcfM5
        A9KAHKFUsynj3oAiLbuTQAmR60AIFyzL2bmgBvOzkYxxQBEXI4xWi2APmPJ+76UwAyYOFHFADGJZs9zQ
        A2g0WwDnpzQMbIRjrQBCeVoAaucUAOMayrjOGFACRBG3CUZI6UAOQ5UGgB1AEiHgUAMf7xoAdGyA/MOa
        AJwR26UGb3JFPyjmgQxj8xbqV4oAeqkKPzoAY8hViKAANlWJ64oAhEe7mg0WwM7hdg6CgYkMQncxO23P
        OR3oATD73xhQOMA0ARngLzub0NADmPPIC+woAeh+UUALQA9ZCoxQZvcdu3c96BCnigBADv6UAK3WgAoA
        MUAIZkXgjmgADBhkdKAEH36AHHrQA0A76AHMpB3H7tADlbcMjj2oAUfeNZvcBWzuJPK0gE34+6DitFsA
        vJ5pgPH+qf60AI4JbigBuDnFZvcBN7jhTxSAXDSfe6igBN23kEkntQBYhhRoXJOx87cCgBHEm3ORgcbu
        /HFADFyVySW9zQAux1G/cNp6DNAB5h9KAEHDlu5oEOaTzB9KAGq28ZPWgZJhii4PFAEqEk7TQISSFi5w
        eKBiqGiAzyD2oAawAY7RgUARP940ARtnNAAfuigBq5xWi2AXn1pgHPqKADn1oAOfUUAMbrn9aAImOSeA
        B/eFBa2G8Do273NBRG3LGgBI+JGzxQAx3IY0AOjyTnFABICXOKAADgIeN3JoAUHPIJY9MdqAHrJtbbja
        /pQBI7Ejk5NADF6UASoyBRkc0ANcgscdKAIX+8aAEoAN5UYxgH+IUANaPyzhTuHrQAwfeoASYg5x971o
        Ag3lOJOfSgA+788nJPSgCMlmYluR6UAIAsvCjBWgA3buv3+5oATJj6nk9aADGOBzQArdFoAnRhtHIoAa
        wcsSGG3tzQAZG5eaAFifBxQBYBLDNAD1lRRhhk0AL5oPQcUAGd3NABsJGUcrIeh9qADcrcrnHv60AMbO
        aADBoAieQqxFAAG3DNABQWnoRvEzMSOlA7jY1KuwPWgLkq8CgdxjY3HnJ/unpQFyJxg7iApPYUCuIsxX
        J5TPcDrQO4qZ+bI2+1AXJITE0EysP3v8BoC5AkmGy2W/2ccUCuW0YOoKrtB7UDuRTd6AuRKCBz930oFc
        PMxxH8uOuaAuG4NyOlA7igPvTB4oFcTBGc9c0DuLtwNwoC4f63rxj1oC4hbLRv1K8UBcEYrIwRjnqQel
        Bm9yUETDkBMdqBD1m8pQ3dqAHlyEDDnd6UARKNpIzQA1chufu+lACuGZwU+72oAmYSAAE/rQAxZCox1N
        ADwd31oAF6tQA6GTgxdA3U0ASRsm0ZHNADiGPK8LQAcjqeaAJEjLKCTlfSgBJNoGF6UAVpORQBVZF3E7
        d5PXPagBF2qWAOR70AJwU++R7CgBBwO5+tADGXaS3rQWthMu/IoKuPUqBhhlu9AXGtIFbOP3f8Q9aBXH
        KTgZ4J6UDuLketAXAMfuDo3NBmxd2/G4mPsPegRIobH3MnuD2oAQFI3yXZg1AEjpGR+7/WgCAoQfLPO7
        k0ASefsjAH3jxVJ2LWxEpO7k5NPmQ9CyhGAKl6kPcZIqeYCw5pCEnwCQOlAEKAlvl4Pc0AOMgEh2jigC
        wjZUZ4NAA/QUANcqCXIyV4oASThF/u9cUAPjIKjb0oAaw8xj6LQA+JgwPGGoAaoZWy54oAkODyPu0AN+
        bs3H1oAs+ai8EZNAEisGUEcCgCaIZ+T+9zQA2OLzmP8As0AOZ33eWPlVu9ZvczYGUbAWclBw/vSEOjkY
        IMkle1ADvNY/d4XtQIUFiMk80DE80A4H3vWgCRJDtGeTQA7tuIAB/i70AJ5uehLe5oARTl80AOf7xoAE
        wCd3IPSgBoBA560AIJMOR6UAPYc7/WgBN27mgCNm3MV9KADaV4BoARXcFgDxQIYxkZc5oAWLdsGTWi2G
        NeUqxFMADbuaAI2kxMooAiJySfeg0Ww6MEn5OCPvUDElaPeeKAImyWO3haABsbMfx+tAEWCPvcmgB652
        igBdoPViPpQA8fcXBz70APZdvzUAN3buaAHAKu1mGQaAJxJE75A4oM3uOJBPHSgQ3btYtQArTc0AKfub
        /WgBqOjKCRzQA1yCxx0oNFsRM25itAxpXAzHw6dTQAxgQf1oAcvSgBrZzQA5elAEqK5UYPFAAAQ5z1oM
        3uTYRRuI5NAgDK3JHB6UAIZCnB60AMZtzZoEPT7ooGL5hU88r6UARs8bHOKAJAQYxjpQAifdFACmQrxQ
        A9CWUGgB3PrQBEf9aaAJU71m9wEGcUgF5rRbAHNMA5oAFk2lhmgBI2yGk/u8Vm9wJYYiVJYAIec96QEb
        uEGFJKjoTQAiksuaAGtJtYCgCZ1M20LwaBD5raW3RXZsg0DIWfy2IA3+oPagBqy/NwSfc0AOaZM8jJoA
        TzQenAoAepyoNAE0XQ0AAiZhkHigA3GP5T1FAB5tAAqvK5AOBQA5kMZ2nkigCvJneaAFXpQBDNJtyK0W
        wBESyA0wCTpQARZ2CgAk6UAMGBGDkk/3aAGfUbfYUGi2BtioGI5oGRZMhynGaAI2DhiGOW70AOXpQAu1
        z0PFADGaRSRmgBAjONzcg0AOI+VQnFAEjFQcOMydzQA2gB6zIigHrQA7cG5HSgAoAjf7xoASgBRHu5oA
        MbehJPoaAGT5wuRt9hQBE8e5c0ARMNq4oAT/AJZigCI89Ts9CO9AARIeRhR6CgA+bGGAH+1QAmYx1yx9
        TQA5CDnHSgAP+roAaGQDkc0AOTB3Y6UANFAD45MHFAE3m0AKDuGaAJFztFAEijKjJ2ehHegBfMI4xj2B
        oAGO4KaAGyZ3GgBhnMZ2+tACSQ4FAFctsOKAE8yg0S0DzKB2IzMDIQPvUBYVpGzz1oAUnKZoCwnCxjdy
        O1AWEiEmDzQAByowetABnPNAWDzjnZ6UBYVndVAB4oAZ5xKqp7UASMu35qAsQ70aQkjmgLEvmxjjbQAm
        4NyOBQFhx+5QFhofAxQAu/fxQFhQu2RBQFhvr9aDNhQIKALEZMcYY/dbtQA4RAv8vAoAiuQFYgfe9aAG
        RMUAJ5NAD5JTJh/7vFADmUIcD73WgBgcq5B60ATA7hmgBcZIT+/zQA0S4c+3FAEwJYZoAOaAHrJgYJ2Y
        6Ed6AHAGXqMe1ADJE8v5fSgCJo9yZoAryRcUARqmxc0AOLbo80ARt92g0S0GrnaKBi80AIy+ZgH+GgLE
        qOm9DIM8cUARkqCcjmgByhioKnC9qDN7gflYeZznpQIsOsmBk5XtQA2OVF3AjmgBisGLEdKAGigC/p2m
        x3rBpJjEFBIAGc1k3qWloU7lFjkJU/LnA4xU3ZVhrTE9QAP7wrVbGb3GtLwuDuHqaoQ/bv59aAEI2nFA
        ByR0wP71ACcdiW9zQBIkvGz0oAmThRQBBL/rDQAxZfKJ96ALEP8AqxQA+gCKXqMHJ/u0AK5dhtwFHoKA
        GhSigHrQB//Z
</value>
  </data>
  <data name="主接驳盒ToolStripMenuItem.BackgroundImage" type="System.Drawing.Bitmap, System.Drawing" mimetype="application/x-microsoft.net.object.bytearray.base64">
    <value>
        /9j/4AAQSkZJRgABAQEASABIAAD/4QAwRXhpZgAATU0AKgAAAAgAAQExAAIAAAAOAAAAGgAAAAB3d3cu
        bWVpdHUuY29tAP/bAEMAAwICAwICAwMDAwQDAwQFCAUFBAQFCgcHBggMCgwMCwoLCw0OEhANDhEOCwsQ
        FhARExQVFRUMDxcYFhQYEhQVFP/bAEMBAwQEBQQFCQUFCRQNCw0UFBQUFBQUFBQUFBQUFBQUFBQUFBQU
        FBQUFBQUFBQUFBQUFBQUFBQUFBQUFBQUFBQUFP/AABEIAH8GpAMBEQACEQEDEQH/xAAfAAABBQEBAQEB
        AQAAAAAAAAAAAQIDBAUGBwgJCgv/xAC1EAACAQMDAgQDBQUEBAAAAX0BAgMABBEFEiExQQYTUWEHInEU
        MoGRoQgjQrHBFVLR8CQzYnKCCQoWFxgZGiUmJygpKjQ1Njc4OTpDREVGR0hJSlNUVVZXWFlaY2RlZmdo
        aWpzdHV2d3h5eoOEhYaHiImKkpOUlZaXmJmaoqOkpaanqKmqsrO0tba3uLm6wsPExcbHyMnK0tPU1dbX
        2Nna4eLj5OXm5+jp6vHy8/T19vf4+fr/xAAfAQADAQEBAQEBAQEBAAAAAAAAAQIDBAUGBwgJCgv/xAC1
        EQACAQIEBAMEBwUEBAABAncAAQIDEQQFITEGEkFRB2FxEyIygQgUQpGhscEJIzNS8BVictEKFiQ04SXx
        FxgZGiYnKCkqNTY3ODk6Q0RFRkdISUpTVFVWV1hZWmNkZWZnaGlqc3R1dnd4eXqCg4SFhoeIiYqSk5SV
        lpeYmZqio6Slpqeoqaqys7S1tre4ubrCw8TFxsfIycrS09TV1tfY2dri4+Tl5ufo6ery8/T19vf4+fr/
        2gAMAwEAAhEDEQA/AOCr+kD+W3uOjJQ8c564oETgBeM0APTrQBIchgSflqWA9pAJTjgUrgDHcc0XAkiY
        gFOgbnNFwHwuGUnPtRcze4wyFTyfl9KLkkisCoPQH1rN7gOyKQCFQo3MMg9KAAeYwzmgAUHec8n2oAk3
        kUAAOWzQBLQAUARs5DEUAJv28/3qAGP+6bjvQAnC8Zq09DRbEEv+sNVcoQ/couA0dKLgIe9UgIBTAjZf
        mJHJ9qDRbETHLZoGRsMk4B3etACYYdTzQBGzKhyRknuKDRbBtb+A/LQMTcSdpPNABjZxQAinMmKDN7ku
        SflPGKBC4VeMZNAB9OB6UAIWI4oGPjOTmgQ9iC3H3vWgBvI6nmgBjHYcjvQA4qVVcnK+lABJyxK8CgBn
        PUnK0APQMT8pwvYUASSMyDawOaAFjyUBxQZvcawO48UCHLjaMnZ6Y70ANdZCxwAo9BQA5RJtHP60AO57
        8mgBDL5XTnNAC5duAeKADaV4PNBotgoGSKH28HA+tBm9yMuyyEHn3oEKxy1AD4+AaAEGB3yf7poAXzCP
        4QPpQBIpZlBzigBrA55oAcudoxQArx7gp60AKxKHFQ2AgJPNF0AcD74yO1FwBDgsCeaLgCHJZTRcB0Q2
        8UXAex+ai4EbsYjk/dai4DiFULtP/ATRcB2fn5AX2FFwFY/MaLgJzRcAAPflfSi4CZHbgUXAUR55ouAY
        VfvDIouAb1Y7V4Wi4DJQ0fCnr2ouBCYSOvWqQBjbxTAjf71ACFypxzxQBGzoTluTQA3I7cCgBjZ3ZPK0
        Gi2ADP3RxQMORQaLYY33jQMYOJlPagB3c/WgBMj1oAPvfICN78qfSgBA8Zc8cjg0Gb3HtjPAwO1AhPlH
        BHP0oAD7IMe9ACfUY9qAEMm04oAazbjkDBoNFsOXcANxyKBjmIK8dKBkNAgoAGxhcfeoGMkzuOetBa2G
        0FBucdDgUAAkPfk0ASIdy5oM3uOxj5qCR0au53ADB9aAJwGUYOM+1AEbybWyf9WPvD1oAXzTtXJzQMmU
        7m29n5oMnuHmYkNAhWbc2aACgB4d1UYOBQA4Enk9aAFyoHKA+5oAaknzts+X1oASRg4yOlAEROQq0AOI
        2nGc0AAbd8vagBzRAKP5UAMXCjFADGDFjg8UAIXK8HrQMepdhw34ZoEOG4/KfzoAVhtTFAEbh9vBwKAG
        KxAweTQMRpRuGWI9qBFgyZQYyw9aAEViyhSu0evegA2heAdw9TQAxs5NACFdvzUAAYsM0APWQIMPyO1A
        BuJPJ5oAXG35u9AEbSnccDf7HtQA5X2qCDndQMXAXigRJGUB5HNADjgyHHSgB6vufb/doAXd50hzwRQA
        9iWAJOVqWzN7kwkAHyjildCFyG6D5vWi4Bgjr1ouAc9MAD170XARYRI+N2fc0XAdLJ9iG0c/Slc0WxSk
        fzHLetFxip+9G3ptq0A1wAxNMBvm0DI2bLE0ASbyLdhjNAhPPcgKZGRB0296AJVkkAHOE9KAFDhhnIoA
        B97pgf3hQBMsPmqcSnA9aAItsmzAbNAEbKXXDHlaAGJLzwMN60Gb3HGRs85JoEBbueM+tBothjABiR9+
        gZCxySZOc9KAD5h1PNACFiOKBhknvQIXn1oAOaADPuKADbv4NAEbIY2x1Wg0WwMAF3AfhQUJGS2TigQ+
        POwUAOjTLsaBkchdXIU8UCGrMxfa1AyUPt4oAXO7vQZvcQhh3xQSPjQucH+GgCVZCX2f3qAHlt5z+FAC
        Yc/dPFADy7KqgcMPvVDYEpkWQKqjBpXAWQPFt+br70XAlCbBnOTRcBM7uadzN7mYv3qsHuTJ+6dnHVqB
        CD75oAsJOm0Jj5h3oAdt38H+GpYDo8SHBOKQD2AjYrkcUAIHI7lh/doAUnPO3b7UWM3uOjKA/OM+lArD
        2w7EE/drN7gOhuFBOUB96QDvNJOcfJ6CgCRWDLkcD0NACqMZZTg96AEDbhkcD3oAXmgLCc55OR6UBYN+
        PuggUANeQ46GgLDVOVFAWDIoAYy+Yx9BWi2NFsRMdzZpjG0AGaAGv0qkBDTAjclT8o25+8woNFsRyKBj
        bll9aBiNjPLke1AEEx2cg7s0DGbdsYFBa2EU+Wuf71BQMAAAB81Ah2VH3hlu5oAQLhtwXC+o60Gb3JQS
        wyCW9zQITa4+ZTQAAlmy3WgBWfBoGAJIzQIMGgA5oAMGgAIIGe1ACbi3y0AGzPy5Hy0AODB9qj7x5zQB
        JPdtMFD8dt1ADQzjAViR2oM3uSxSHBzyaBAOm7oTQAu7dzQAUAFAEbcsaAHrwozxQAu7dx2oNFsSQeWk
        o3jPHFAxjfeP1oM3uNeXIVADkd6BChmWdQeeOtAEitkZPrQAx+tAD0+6KAFoAerZG2gBcbeARQAm/BxQ
        AuSec1LAXn1pAB+7QAioGAwPmoAXay8E5NABg0AJyMv3TigAA2HlfMz0B/hoAkSP5QSxb3oAOAcZoAXj
        oB81ABIzJGoIOfWgBY23ZNADc/u3HfNADXZw3ynigBVJI+brQA2XnHAA/vCgAK7fm7f3u9AETSOTlWyP
        U1SAASRlutMCNo2clgeB70AIXaRAQcN/FQBE/RdqZHrQA2TO48Y9qAEZSE3UGi2GiZljBTgtQMFDBRuI
        JoNVsNbk0ANyW+XFAC7dvFAEblAxyOfpQA3g9BxQAgxuOB83rQQyUOU4f5vTFBIu2T7+aADJPLdaADbv
        /CgYoZSMkEn6UADY28cCgtbENAwzQMliXeDnjFAFeTezkg4FACb2UYPPvQAhOefWg0WwZHrQMAd3y0AM
        c7GIHSgByT7FB9aDNkqtkbaBAJNrmPsKAJkk2ZHFADSSQpJ+WgBeN+RwKAJuce1Bm9wGT0OaBD1KbcEf
        P60AO24G6gQEgplxkHpQAsfCDJ5oAJGyNvagCNFKnnlKAHl+flBxQAmc80ARudhz60DHq2xQKAF3l/lH
        D/wn0oAYy4Jx0HWgQikoSe9AyJyZMNg0CJB90cAD+9QMN4HAkY/hQIN57ZPvQMYwYsSeV9KAHryvy8Cg
        BrFQfmGT64oECOwb5OF7UAPZ2J5yTQMTDnkUALhu9AEbLJuPPy+lACFypxigA8w+lADo2BPAw3rQBIwY
        HnrQITkZbqV7UDDaR/OgQYNADjIVVR6UALkM+SxFADml8s4HIP8AEOtADkGVwp3Ofut6UASoRtGKlmb3
        JFkwMZpWESrNhR/jRYBfN/zmiwA/Cq/rQA+Rw8Q4AP8AeoAqsMLyd3uaLGi2IelFhgkmCRVICInJyeKY
        BQAxuCecUAOEpWMN1K8UACy4AoGOLZSgQsRThCPvcmgB7Sjdx06UDHrKcCgQ5X2kt/eoGMcbV9qBEaZ3
        HJ+X0oM2OaUZ+U/LQIBKrcEbyPXt9KDRbEbyfxAfK38XegZGyEE4JYepoAa3IHegBxzmgBvmKvBUk0AL
        ndyOBQAc0AMdlQkkEmgByt5ihhwD2NAxeaC1sMfrzQMRZCpIoGNBDdWIPoKAJUPyjBz9aAGt1NACYoEN
        H+soAUkpITQQ9yQPvG5wSD0oESRyFAQetAgVgw4+9QAu9l4PJoAesm1Q3egBWfeoapYEueBkAD+93pWA
        UYHQ59zRYBC+3iiwEqTHaKDN7lVEDQrj73rVmgiAocE80ATAg96hsBTjoB81K4Eibtozgmi4Ei7FGSPm
        ouBHvR5CNpxTuZvcerhXIXoKLiHO27BouAM2w5Hei4CbdpxWb3AlQoFGRz9KQEiyYUbRxQA5SWLGgBFH
        GMc0APJ+VaAGySbW9qAE83jgYb1oAPNbvyaADzT6UAKDu5oAil9e1ACvJhcVonoBEDl0NO4DfX60XAYx
        56ii6ATJ9RRdAMkPbPT56LoCJuVz3PNUjRbEe91DAHApjIVLEcnmg0WwZPqKChkkpUFupT0oAYpyM+vN
        Ahc0AGaAJF+6OaCGGSnI53UEi4K8ZoAOaACT7i0AIOnWgCX/AJZCgCPk9DQAmH7GgBdrfdb7rUAGQ33e
        BQAZXuMmgA69OlACpEJC2e1ABEcfP/c4oAmXAbrQA9iM9ahsCFw5fIPFK4E3O9MnJxVoBP4KYCLjHH3q
        AF6ff5oAPl/hGB6VDYBmlcBF+9VoBzdaYDS5XigBc55PegB6ncAlQ2A4DHGc0rgFFwCi4BTuZvcDg8Af
        NRcQYI+91ouA9XIGKVwFBJ5zTugDPuKLoBBIVcii6AcxLHNF0A0yFUce9FwHctg+1F0ANIQuOtFwGIOd
        /rRcCbzsjj71FwFJbblm3Z/houARsOeAvtRcBjkFePvetFwGoG2jJyaLoBeaLoA59qLlrYCfl60rlEVF
        wBiNvWi4ESckr2bnNWtgIjkk0wDIY7SxFACyLiNQDketAEchMYyT8rdqAGgjG0DC0ANddo2ig0WwxZCq
        4oKF800AHztyDQIjbO45OTQAm7ZyOd1AwAxwOaBEqZCigBABv+8R7UAObuc5HrQANwtADVcqoFAxd2eS
        etADHKBjkc0CGBFZ8jgUGi2HurY+Vhj60FEGD360CHH7lAyE5GXPRegoAMf3elAB5pj6c59KAE3bvl7U
        AATaxFACl9shGKAHg7qAF60CLEJTyxkZNAxxAc8cAdKBCA55ySfQ0EPclVig6YLdhQIXBXigQ9ZCoxQM
        XOeckn+7QZPcMbzggLjtQIUshQZHNQ2aLYaMY46UXGLvIGE4PeqQDWkyeAcUxiEkqPWgQ1cgUDHLn5vS
        gQ1ZNvbKD7w9aBi5Y8n9aAGmYx7sc59KAI1H7oUCJIs7BQA1pCGIoGJ5jH7vBHWgRIrblBHH1oGMbIbJ
        Py0CDg9OlADS0gPy9KAF81h160DHqQyglyPYUCEkDkcfd/vd6AI0BDcksfU0APzhm5oAarCMZbkHpQMU
        SsevWgB6zfKOzetACMJCc5oEJtkzjPNAD1wFG8ZNBDDPocCgkI/vtQBIkvlg470DJEICiobEAkw+O1K4
        E4ZCMkc0XAkUjHGAKLgSJtYYcg+gouAFfL+UkGi4DGQE5ouAx0QDnrRcBv2ePygy4DGi4FeUEEA8mi4A
        IWkZucAetWtgImK7cMMt3pgJkeWMcCg0Ww0sCqqy4H96gY8qAcIdw7UGb3GlX7UCH7yqqD1FADxN8zUA
        OQnaCxwD2oAcWycfwfwj0oAZhVZhIcMO696hsBCQU4G32pXAiOB98ZHarQD0B2jPJpgOJLKFXjHWgCIr
        t6cL70ARvIQx70DHIxZQc0CHc+tABz60AGT6ig0WwZPqKCiN5CrEUANYlsEnK+lADjjPHAoLWw3ekb5I
        5PWgoUgCT5elAgflX/CgYebjgUGb3DcG6feoEIpO/k5NAhzOQfagY5WXaNw5oM3uL8p+6MGgkfHkH5ut
        AD2G9jz0oAkhZCCrfx9ahvUBmQzDHSlcCRv9aaLgDdaLgOWQqMUXAqxvhQMVoA7OeaAJE5X7oA/vDrUs
        B8blTjduSlYBxJaQlThfSiwEo3Y55NFgAuRxRYzZIrptCIDvf75oEBIzx0oATqwxz9KAHy/Jh153elZv
        cB4bI29KQBu2cA0AOjl5oAkaUkkDlz90+lACBg3170AShoxH84z6UARbtx20ALt28UAFACZHrQA0kDJP
        3B973oArj3NaLYBd+KegDHJJz0+tAEcnTmgBifdoAY4wS360ARyS8cAhvXFUjRbEOWIyTzTGNOfm+lBo
        tiMf6sUDGLwTQAg4HNABQAUAPVsgL2oIZKo2jGRQIVugoEOOc0ANwep5WgBcp6GgBMd/4PSgBev3eBQA
        c0AJksdvpQMAu1iKBDmyCX7r0oGJgigBV6tQIYA3Y0DHYYdaAHr0qWIkVSIWbqM9KVgHFg+COmKpAFMA
        oAOO3DUARssm48/rUNAJgjr1osBIn3RVIA8wjimMGJIBNAhxHmEj+7QAm4gZH32+6fSpYEigKoxxSsA5
        vuUWAarlVApWQC7s8mmZvcepG3A+9QIac555NAAzkLjBoAapyOeKAAkHp96gCRQVUMTzQAoYtzQAj9Fz
        QA55NoC9/SgBqtkZzigBc+4oAM/7QoAM+4oAMr35NABu3EqBwKAJYl2KR29aAIznJ5oAjbrRY0WwmaLD
        HRlQfm5FFgGzorsSg4NKyAhUbRirQC5pgNH3moAjR2V+fu+lACTsrAEj5T92gBnzDqeaBjOSsoH+sONp
        9KC1sRM2Tj0oGSIuFwKAI3OxsjndQMjdSGwpwe9ADt3yrtUEUALuCPkABm9KAJfMK/IT0oAXHHtQIQEZ
        yfuD7w9aAD7v3xkdqADJPymgYxk3MV/u0ANznmgBx27BkZP0oLWxAcZ46UFCNIRgCgBxO45oAjbOetAC
        ElOf71AAVxwTs9CO9ABz6BfagAw56HigA5HU80AGCfu8HvQA9SNu8D7vAFAEivtGM+9ACq+98UASs2wB
        R2oM2DTFWBAzn0oETmgBo++aBEvWgh7iZHrQSGR6ipZotgyPWkUMkfBA61SADvY5HSmAnmbeP4/WgBfM
        bv1oAdGxY4P3aACQKHITrQBE4OOeTQIWLOwUDHc+1AEb70bKn71ACbtny/xetACKSXy3WgBx60BYKAsF
        AWEzQAqoCWNAhANoxQBKgO3gcUDGN940AJuTHIyR1NAhPlk6dB0oGG7dQAb9vDAkdqBEiFioyRmgYx3M
        ZMndeKAGvOWCg0Gb3FK7zj+7QIPmYfKCD3oAkXkfLwKAF59qloQ9elKwEqPhQKVkAvmU7ASwKrNudQF9
        e9FgJ32hj5ZyvbNFgCJBPKkZIAPNFgI5YsyN9cUWAhkTcMH+H1osBANxYsfu9qLAMnWaNgWOQapAAGC2
        KYEe7cQtBqtiWRccDnFAEaSbJE9PWgh7jlIZmO4igQigkcHIoAB940CJRwCQA/rn+GgA74BLUAOQYz2q
        WAwc0rAMYHcSeVqkMQuw+7wvamIepJHzdaAEcBxjOSv8JoAjbLLyu0+goAavCjNAEgBCg9BQMa3Unt60
        AJQWtgoKI3+8aAHLjaMfeoAY7lWIJ5oLWwgZD1GTQUSeaojABGPSgBi5lLbTt29Se9ADVYOMgcUGbHj7
        poERxA+lAEpdlZc/doAkfEzZHCjpQZvcaJGI6ZoESJkqD0oELg0DHr0qGhC7yBjbgf3hRYCRDlepPuaL
        ALtc9OlFgJFwFAYfN3osBW2bBx98/dNDYBuD8ilcCRTsUEc560XAs2tnJPkxgYXkk96LgQyKROwxz6Ci
        4EyN8o5FFwBz0ouAvm+U/HOaLgOOc0XAfkrGNhwT96i4DURlPy8CoZm9xzZzz1pCEoNFsLtwN1Ax6udo
        ZOD3oM3uO3B/nA60CE8wn1oAQbmbI4PrQBMAwHzHLetAC0ARvHuYmgCOQFRz930oAYDHj7v6UALgP04A
        6ZoAYx+YlwSO1WnoWtiJtwOWORTuUBYIuV6N2ouBEyOFCA8NzRcCJiSnJ56UXAiPJ2f3uaLgGSatbGi2
        GSnA54pjGKSBwN/qD2oAYTHnu3vQAhIHI4FABz1J+WgCVGj2jigBBjfxwKAJhnFQ2ZvcOfalcQc+1FwH
        qoIyTRcBrDBwKLgJyPSi4BzTuaLYSP77UXGO5qkBE8hVsUxjXkOBwaAJgSwBoANuPm71DYgBLc0XQx69
        KLmT3FMjQ8n7rUriDzMcAcUXAkVsqDRcBeF5yPzouApbcgNFwISrk8Hii4Ccj7x5ouAuHP3TxRdASJwo
        B+/3NFwHMTtGTzRcBq9KLgLh+xwKLgOj3A/Mcii4EhIJ+XpRcBKLgHQUXAKLgNAbecHii4DmHPzMQaLg
        HHrn60XAKLgFFwJFPyjpRcBeR0Af1z2ouAm6PG1eZv4WNFwGN1ouAN92i4DIygPI5ouBMHjPy7ePpRcB
        cbeF6UXAcmSfl4Pei4D5ZcqFAOKLgRsCDii4CMRtxkZouBFuQdRzRcAUjLEdKLgCEbDzRcCsw5NFwE2Z
        GaLgK2AmM0XAE+4QD85+6fSi4ERCyJgcMtWjRbEeSfvdaYxN3l8+tAxRsXgjJoEIcH7nHrQaLYjYjccd
        KCiNxyeOKAG0CJFGF6UALQMerlQM8rQZvcdvVhlRg0Eh8w+8cigAyO3AoAY5Bbjr60Gi2G4P3Sfvck0F
        CkuU3g42cAUARFSpwevWgBOO33vWgBUyCQTzQAxulADFzjrQAEN68UAOPC4PWgBq52jFAC7M0AGCOKAE
        L7TigCRMsoNAAHKuRQBOhySTxmgBYHKEjGKBDhId54qWyGTId2TSuSSQ8KaLgRknJwgPvRcYZb+4tFwD
        n2B9KLgBYjilcAyT3p3ATPuKLoBeT3FF0AZI64qkBG7kMRTAepJUHigBjSEMcUAJndzQWtiN1fccHAoG
        N3leDyaAJUbKigY7KDqOalsAYjbxwKVwIlcqWGKpCEHIzimAb8Hy+zUEMkWTzFwBhulBIFpYeN2VNBot
        hjA7jn7vpQMesaOoVvkRuRjv9aCGNcgsdq7R0xQSN4PT73egB0crZ2HnHegZIetAgoAjdjGxIG/d1B7U
        DFjfYcA7h60APaUk0AJ5xTnB+agBdrn7p4oEOR2RsHrQMmSUnNQ2Iem0LuI+Y0rgTIwZQRx7UXM3uKp5
        ai4hFTA3daLgL5jehouApHmrz1ouBWngdAFU/K3JouBA0zZ+c8dMUXNFsG/zeI+AOtFxjJSIyCvT2q0M
        QybvnJKe47/WmIVbpXUiRevQCgBiymFR15oGOWSSMnaeDQIQSKgwwy1AyRZRgED92PvD1oAUOVfcf8ig
        BWmZiSfumob1ATLPzGdo75OKVwF/HFO4EbqXYg9qLgNEp3dKpATbtw5AA/vd6YgHThtw9TQBG/zsQT92
        gYhnYrg/dFACNKqxrj/Vj7woERtIc80Gi2DOaBhkUDE8zHFADGO45oAcreWo96AGnYshBGTQArctn+Ds
        KAHQ4y2BgUAKcZoAkQ/KKAF3bjtoAY8hUbOwoM3uLG5VAKBDvnPIOAaBEiBsc8mgYvmEHHWobMnuPWU7
        RxSuIXzT6UXAeJHxxxRcBwyRk9aLgVd+09ST/d7U2BIrFhkgKfSiwEkKNIxTcArUWAmVpI1KI5G3riiw
        CIkkieahIK9c0tAHYjXjHz9zRoAg+/RoArYzx96jQB6ZC4JGaNAAOQ5FGgEu7PJqGZvcUSIvBGTSEJuD
        HjjPag0Ww5O9AxooM3uHmmLp3oEWIj+7FACONzbOzc0AOU/KO3agBjvhiKAHo2UBNAEMnMhxz9KAEMio
        uCDmgBqspGT0PQelADZCYxk8k1aWhotiHG3iqsMjd9rH+dFgImk+Y8UWAjYknNFgE8vdzRYBjI4Y4PFU
        jRbCSFVRfNGT2pjGdjQBGn3KAEkBAy/Kn7ooAI/uCgBVch+lAybOevFAiRTx1FSyGOXq1KxIig4osAuD
        RYBOaLAG3fx6UWATdnnIFFjRbDRIQzd6LDFjYlRVIY1x5jY/u0wHq2VB/nQAufcUAMYOWODxUsQq5AGS
        M0rDJE60WM3uPYb2I9KLEiZ3c0WAKLAGU7jJosAJIASB0osAnznnOPalZAKEJGWPNOwAVdehwO2aVkBI
        mdoz1p2AY4wc0WAev3RRYBc0WAOlFgJE+6KLALmiwCNj5cEk/wB3tRYBxPPIC+wosA0lTwPvUWAXkdTz
        RYCNvvGiwDo+hosAq9KLAKSB1OKLAJ5p+72FFgFA4osAuD6UtACjQBo+/TsBKOnaiwC5+lLQBN+KNAAs
        78A4A6Zo0AA7Nyx5o0AAiF8sOaNAHuseKNAIWAC/KOKdgIaLAK33aLARt9yiwEWDRYBOfaiwCP2qkaLY
        R/vGmMa8Q8l2zye1ADFPzflQAS80Gi2ICOaCg3OOuStACArvJYHB6CgCwMiFsnmgBH+9+AoARvu0GbGr
        0oFYlT7tADG5Y0BYSgtbB1R+9BRJt2gMaAGMvmHd60ARMMMRQA0rghqAElfDlh/FQA1RtJFACAgD5+R2
        oAUYX5n+b2oANwbleF96AEU5c85oAc2dx5oATco4KBj60APDvj5flHpQAvONxOTQAAk8seD90UASLIY1
        xKd3pQBKkr7R8ob3qWZsXMjc/d9qVhWHrnAyRmiwCmTbxmiwWD/bzzRYLB1G/uaLAAYtznmiwDW+8aBC
        Ept5HNAxYyNgxwPSiwA3BJYZHaqQDee55pgHGeuT/dNAB9QF9hQFhWXC7hzmg0WxDndzQMQH5zQAuR5h
        5oAeeq1LAc2BKS3IPSlYBkmd5ycmqQDfMKnnlfSmAxgCS6jr2oM2OWXKigQKcsTQaLYUn94aBko6UGbG
        P940CsNzn7pAPfmgAypxzsHbHegAdX+Xjb7UAKXK8HrQMUshTkc0CGrjHHSgA+Ynhhj60AG8rwTzQBIs
        jFRs60AClwxeQ528UASAKG4YgVLESiULwDn3pWAkSQg5wcUWIe49jk5osSKjuDwePrRYB5lOeTk0WAaJ
        Tv8AeloAjl5ZDGDw1GgFeS1Z5D8pY+wzT0NFsQOphbAHWixQEbUxVgID5cY96AECeWuc0AMZtzZoATzN
        vFACiZe/JoAes3Ax0oAXzTQAnmnNS0AecvcEmlYBdjSfMg3A9m7UWEI7mMBd27HeiwDi27mqQwpgIXKj
        2HegBQykZK5P0oAjfG44HFAWInHzGgLC7gyqoGD60FrYR1KsQTk0FDelABkpyOc0AGADjfg+goAYw54O
        R6mgBOfUUAPVyBigBTLj/wDXQAZ3c0ASJ90UACviZRQA4nJJoM2PUjaOaBC5X+LkdqAFSQxE9yfSgByA
        7MD75+6fSpZk9xrPhsAUrCFSXBosBPndzRYCRDGF+Z2B9BRYCvyB6UXRsI3IXvRcRIv3qLgSB3D8HApX
        AfJLIg65zUPcBiuyjB60hkyHctBk9xc0CBerUAORtiA0AODmQbvWgB6njrQAv3B5meVoAM559eaADNAC
        g7vloAN2zj+tBm9x0bZOaBBI+HOOaAG8nnFACkEJk/d9KDRbDRIoGEGDQMMnq3X1oAYz88cigZG+9hkH
        FWnoIhwR1607gKRldn96i4EbHKUXAhOadzRbCHd2P60rooBn1FO6AbMCVHei4iJ5NoxVIY1UVwGZiE/i
        HrTEHT5c5HY0AKRhcDnHpQAxA+eDgUATiPPJPNAxFXD1LETDOKVxj16UXENZiDSuMTJPencAwaLoBkm0
        dRk0XELH9wY4FFxjTzKnfii4hAOKLgLJ/q1ouA1ui0XAlXOOtFxkcoJI70XESDOBRcYuCaLoB69KLiGt
        nNFxjl+6M0XMnuKyjarKPmpXEDEnlutFwA8gY5+lFwF2PIxCYf1B/houAqKIzjdu96LgSMcHLnK9hRcB
        KLgHydxk/Si4CsVC8jj+EelFwGElFXPJNFwHkYOKLgPU/KKLgMb7xouAmMc0XAM7uaLgFFwCi4D1AVQ2
        aLgMkZWwSMmi4EgIwMdKLgBl28UXAmjZGQ7iQe4qGBCJMDC8rSAUHdzVp6AC8FqdwBRxUMCxEkckRDtg
        jtSAjAEnAOQvTNAAE3NuPFADnGBigCLBx0oATDnoePrVp6AREESHPWncBW60XAif7xouAH7lO5otiJRv
        LZ4xRcYiksM0XGLzRdAMbrzRcRE/3qLgO6Rii5otiPNFyg2Pjcp4qkBG5LMS3WmA7+BaAJweKAGN941L
        AbSuAE+XyP4qLgLt2j2ouAE5UUXAYmS2FOGouA9g6n94c0XATcDwOBRcBjLhiBRcBNgPfn60XAiYbZCK
        pAEnJFMCN8iUlj8tAD0RXbK96AGyqVc5+7QWthpCjlRg0FC5JGW60Gb3EOOww3rQIeGZRg9aAFDZ7igC
        VQdtAAmA2WGRQBP5ihV2DC+lSwJCd3NK4DR9+i4hwG9mz2ouMauWGVGD3ouApRwdwOF9KLgGdw4HzUrm
        b3FwR1607kj1zt60XRothjjad1FyholbqeV9KLgIJowx4ouAsjBiCOlFwHNytFwImfC43EewqkBCZMHu
        aYBnPNABQAedj5DwKAHq+wY6UAOzmpYDGGGyOppXAbkvyvB71SEIWXPBApjFEmOBz+NAATnmgB6vhRUs
        BrHJzSuAmUH3hz9KpAICCxI4ApgSiTzfmPU0ALvI4oEG7PNAw57/AHaBDHABLCgY3O4ZoAer4AFAEkbD
        OW5B6UCHs7Kx3HK1DZD3EjxK7EDAHrRcksJcF4gh6LRcYqOZAAaLoBSu3ii4h4+4tFwLKoIozM3PZRWb
        3AjRhbLyCWbk0gF+0yI6NACGA5pdQKs27zGyeTya6IjIZI3YZ4UH+LNJvUtbDFG0Y3bj6mlcoSTkHvjr
        VIRASU5xTAQMZBu9aBksSAg5OCaAEChhjP3aABWyxNADmPO/+7wKDN7joxhv1oEPeQqu4c7OKlsBEK7R
        uHJ56UriAorHI4HpRc0WxG7bGIouUKsh8pkJ+VjnFFwHmfP3enSlcAB3c07gRuRuNFwImVyxKnii4AmR
        kHrRcBCN6YJ6VSAPOKRjHU0wI8bfmz1oATzC/B4oAGG0ADmgAw5k4PFAEuVHDjLd6AGMGYkpnbQA5HKq
        AeT9aAJIzuOaAHnk8c/SgCJ+WNAD1I2jHDUAPQmMgk5JoAez7DgGobM3uHmmlckRTl807gS4Y9OlK6GP
        WQouCefrTugICCDy24UWEPQjPHAoAmoADyq4oAl6AVm9wCkAj5YLsOCOtBDHFgxwOlBI9QFXFAEiqCM5
        oAdgjigBo+8aAJCVDDdyKAHvtZ/kHHpQAgTcM0AB/dfjQAjxDA5oM2KRg49KBBlO5INAEiIZFwh/E0AJ
        JG0a7W5IoNFsQHNAwbOzk5WgBqkY44HpQA1utWrWAib7xp6AJTsBG3LGiwDJOBzQaLYhBTuMn6UDA47c
        CgYjTeUvHeiwWIm5AqkFhz9KYWGL0oCwDJb5eD3oAe2CTtHFADl+6KAsSKeOoqWA7n1pWAOfWiwB8/Y8
        UWEJx/FyaLDEaTAAGcCiwDixPOaLARs25iuc0WAeo2rjNFgGySEDFFgsNQlgOOtAWDNAWAHBOeKAsIHK
        jHNAWJUJZQaLAL8x+7we9FkAm/HAHFFgJFOVBoEOP3KLEMTfiMCixIitvGMUWAcH8gkDJzRYBYyq42j5
        j96loBIyxMxGMBfWjQBBGJ+RwBRoAYo0AN+3inYA3Z5osAUWAKLAFLQCRPuijQBjfeNGgCUaADDIHejQ
        BW60aAIIwxyDkn+GjQBdrDqMD0FGgCcHp0o0ABj+IZHajQCSIhAcEtIe3aoe4EbM0bFWGCOwpDJEbco7
        mrVrCB+cU9AJVzgVDAY33qQE0eCgAHzUDGShgRuORQIUvz8oOKBkb+Ywzn5fSgBq/dFWrWENk6U9AGL0
        o0AY/wB40aARtnPFOxotiOcHaKLDHJnaKLDFyfUUWAilYsQtFgBkycZ4XpQFiNm3Emg0WwgKZywyg+8P
        WgYGUxdB1qkBGw+amABiOACfpQA9clQcUATAHyxxUsCPo60gEFABjngkn+7QALksflx7CgBW2jkfe9aA
        ImJY5PJoASgCRPuigBrIrE44agBMKvDDLetUgI2+8ccCmBGwDMd4yBQA6OVVBlXgLwBQAqSKVJcjnoKD
        RbELAgDd1oGKRvOPSgze4CXH3uR2oEKCSMnk0APVo8Yx8/rQBIs5QBeuaAFKOvAOBQA+PIPJ5qWA5nw2
        KQEiHKg0AOoAeudo9KAGNgnj73rQA5cgckZosZsax5NArCHI5P3aDRbCOd2ABgUDHEAHAOaAI2KbjkZN
        ADSR24FABvxQApk2pu71SAhA81t570wFYAHGaAEyPWgBjZycDf8AXtQAsY3nrkDuaAHk7jmpYCEHoOJD
        90+lIBWI2cGqQEDFMnIyfWmAkRBkOOlAE0pBoASN8IBUsCeJBMDkgY9aQDHOF5qkBEc5pgIXxwAd3rQA
        5JWztagB7YBoATfjigBr5YZxQAkTlOv3aAJGYMS6j7vAFADQ+x8UATA7hmpZmyRZVQYIOaQrC+bn7ucf
        SgB6uXGD2oAFlJfPJP8AdIosFiRZTu5G32FFgsTPPJIgQdFrN7iEaV2C7fvD71IZagvEgDBh87j5D6Uu
        oilcMGckd63iBXk+4tD3NFsRNjPHX1pFAjmAlzkqfvY71SERsSVyeppjIS0g6dKAHqx27z95eKAFxj+d
        ABmgCRPuigze4tAh6zIq4PWpYWATAvxwKQWY8tuOaDRbETkBjzQMiYjd1oAchG0c0AOWUxk45z6UAA2g
        fMOfpQAyQE/dOF9KAGhSEBJy1AEe4tzmqQCr1NMBmDkfWgB8igtmgBo4agBWABLZoAAxYZoAlRvLQn+9
        QAxAFXFADuv3Tg96AJIzkHy+PX3oAjYjJxwKACgCRPuigAIO4VLM2S5w9IVhxIzQFhyn5eoosFhryKrY
        K5PriiwDVJZskUXEShcDdRcBxbcoNFwBH2wsKVwJi25VPtUMB7n5aQEOCeccUASIeU/GgAHSgCRcFQB9
        71oAlXIXk80EPcXnGc0Ei4NBoth6527lOCvWgYF9sbhRx1oIe4u4dX7jigkMHvyaAFQdaAG9OvFAAd6c
        g8elACmZinzdaAIycrmgBq9OtADD/rTQAr/doNFsQnjrQMZI5UYq09BjFfChqdwIZGZ3LH7pouA5Txxw
        KdwGPndknK0XLWxG+NxxwKLlCKQCeaLgIOlFwDds6dWouAEBOM0XAkQ/KKLgA+/RcBcrvORn3ouZslC4
        G4cr6Urkh1+f+E9qdwGsd2G/h9KLgPPJ+XgUXGNIMXz92ouA1zx70XERx/eouBMPrRdGi2Gt1ouUN+fl
        wfu9KLgI6lQuevWi4C9Og3+oPai4D14UYbI96LoB3PqKLozYc0XQgwaLoAw5PFF0ADOOTRdABYilcB4P
        lKH7tTuAtFxB8xHygL/tVm9wHKrDbubefWkBLKGT51P3qAIw7KME80DGsdzE1aeghKq4D1k2rjNFxjgS
        3NFxCt9ys3uAwgbV+Yj2pAPOM4XJb1oAT5Rw4y3egA34+6DigYbd3J7+tAg3FPlH3/4T6UABnMfIH3qA
        DGKABW2EkfxUDFjPld+aAHF2dmbZkHoT3oAjB2jhcOetAEqjYoDHmgQpcrxigYA569aAJI1YAsp4oERk
        k8t1oAk80xxjbzn0oGR4oEKwO3pQAwZAGT8vpQMilO2QlejUAMI28UCEU/NVp6AE3WquBGoOKLjIz/rD
        RcQp60XNFsFFyiNh8xouARnDUXAJPvmi4DaLgRGSSOU7eh9KLgS7ZPX9aLgIXdeM0XAUEnr1ouAHii4A
        W8vn+9RcA8zyeBzmi4C5TZyMmi4EW/HQcUXQCbkPUc0XAkUjbxwKLmi2GP8AeNFxib8cUXQDGJY5ougG
        H+L6UXAjSNWHBy/pRcB20H5ZECle4ouAEhl4JI9+tFwGqhC+Yx+VegouA5gqrhenWi4DVOFHai4Du+PW
        i4DkfacUXAe8vFFwFiOQDRcze5I42nd3ouIVZePSi4EsUuAaLoBRIw6/d9KLgL5ufujilcABzzTuAtFw
        EK7zg8baLgRtJ8x5JP8AdNFwBZGycrj2FFwGhy42kbR60XAYwAbAbd70XATeV4xRdAGc0XAM46n5fTNF
        wHGMMmR0oui1sQ429CMUXRQm7d8pouAZ2cZ6UXAekuDRcAmm6t/d4FFwIc/rzVIBDkck/LTAVAMll71D
        YDFl+f0PvRdASGYoQRyTRcCSRwGwB83rRcBMGT73VapbAIuS2cUwFZyCfQUAG4nvj60APVkCjd1oAaxB
        PynigB0cm0EUGb3GkljmgQ0u2cLwR1oAUHd049qAF37SAWIPoKlgWc55zmlcByylRilcB2Q3JYg+lO4D
        o5Np3BixTjBouBI2Sc4C55xRdAOWUxDjvWb3M3uAbY+aQh7OXGQN5PUHtQIgKA/xZ9zQMa+AMVaeha2I
        W+7VXKE42DLke1FwIu+Ac0XAa/SqRothiuQKYyRW+UE8UGb3Gnk8HigQ5W2DPWgBrOZDu9aBDlPHJFS2
        arYFbc5HZaVxkom3DNFzN7jiEZMsOaLiI2jUrxwPSi5otiHbt44ouhjkcqcEAD+9RcB7SHPdh6mi6ATO
        7mi4DZMEY5RvUd6LgQkEfeABouA9TxwRRdADuQB3AougGudzE0XASi4BRcBy8xOBzzRcBxPoR0ougDPu
        KLoze4DJ70XQhokw5HWqQEwAcZJ5pgBGOKlgPjcqcYpXAe28nIOAaLgJuLfKf4e9FwE8zfyeKLgSoRtH
        NFxDvMxx/Wi4x4yByeaLGQZ9xRYA3ke9LQBckjNGgEuD5YqHuIaAQOfu+lICWKbgqBhaBjHHTvQIkHSg
        CRD8ooAXNBDE8zaeeYx94etBIeYw6ig1WxPEdyA0AP3kdqCHuJnPNBIu/HFAxpkYsNnBHWgCSZluAFUH
        K0BYbu8n/WcntQIjZmckk8mgYH7ooERL1agBF6UAMd8MaDVbCbh1bnPSgZDMzqSG5WrVrCI1O5QRwp6U
        9Bi8jvTsBG0LzE7DjbyaLBYTI9aDRbDJCPWgZB1NAEi8KKAGsMEsKAGhgeX6HpQBIikKCeTQBKjoVG4c
        0ASgjaMHAosZvcCWTlWHzUWFYXaV4JyaWgBg0aAHPqKNADn1o0AY8Xzb/WjQBtPQLC0Gi2CgY0f6ygBZ
        CWIWgBSu04HNACE468UAIPv0GbJRnFFhWF+bsaLILApKEnqWpaBYTbtjce9PQQpYscf3RRoMeh85cnjH
        rRoAu7IzS0ASoe4g+fscD60gFDleDyaBhkk5J+X0zQA5MHOBxVq1hDcYqtAEX71GgE3H94j2FGgCfwvj
        JrN7gDyY2gc0hjjuaVNvBxQA0BgPmOWoELh+xwKADp9/n0oAEBYsGOMdKBiBuMuOD0oAUA9SDn+8elAg
        J55IP04oAPKH388mgCRVeTZlvkUHHNAEKl2ckHAzQMew3nDHpQIN5XazdPSgY8yrJKWB4NAA8pjR8c7j
        QA6Ufu1oEOUNtG3KnvnigBrK2S6fd9KAG+aw69aBkch3EGgQp60AMePcM0AQbSDgVatYYEEdaegAclBt
        PPf3o0ERtgrwOKegCCJmjBBx7UaGi2BVKrg0aDuKCMNz2oGQigBcUAJQAFtncHPYDmgA2hOMEexNAEb/
        AHjQA9CNoA+9QArAgDPWgBj8se9ADcH0oAkUmMDjlqAHbccdaAI2B3HigB8ceVJORQWtiMjBwOaChKAG
        MCTxQALwWzQBEVdj8nWiwERSUSEE80WAeoO7nqfkoAdJgEbgSBxQAkm042DC0ARzHkUASDpgH94fun0o
        sBIhyBg0WAXn1oADuj5PIbp7UGb3EDeU+2T5j2xQIlyT1OTQA4HG3mgCVjmVcc8dqACOTaaNAJC245oA
        aX2HI60AKH8z5u9ADG6mgBvmY4zQBGzZYmgBMjt971oAFBDc9aAsK7bGJHegCNgik71LemBQA5T5YBBJ
        J/hosaLYSWMeW+QF9hQMhOBxmgAoAKAHqm4e9FgGtsVsEc1SARkVlyOBTAap8scdalgNaRZCSVO/ucUg
        CMjPUUATiQgYCgj1osgF3knZjAbmqQBl25zx0pgB+Ujd90feB70ARS5yM9aAAtk7e1AD0G04oAdJ1FBm
        9xTnr2oEN6Mc0AOaQA4AO71oAcuQu4n5qlgL5uaVgHxncc0APZyDigBY5eaAHtLzQAglJ6fpWbM3uSI5
        B6EUhE6NncTQFiJkBOc0BYjbGcL971rRbGi2E8vJ+Y/NTGQzRDJoArlinyj7/wDCfSgLClgyAiqRothF
        B2imMjkyGyx+Wgze45ZABhelAhXywUr170AI5BY4oAjA3uR021LNFsTJJuyCaQxybVUAfe9aDN7jg5HB
        5P1osIcTuSg0WxE/C88UDGF9yqP7tADjOzHJ+6e1FgGiYbvl6UWAmB3DNAEMvegBkUqqCNgLetADUmLv
        5Z4Dc0ASE5P6UAMftQA40AOE4iAC/eP3qLAI2CcqMCgBUKBuRzQZsc7BCSvQ0CI3ABwPvetUgFQ88nJp
        gT1LAMP2OBSAkRWZfnIIFACtIAmV/i7UARExqcHk0ASRMmCT90/dFAAMgYJ5oAmB3Y96LgBjDc0XAkUE
        KBms3uZskUZATP3utIQfOehwPrQIOe5yaABQwfJ+7QBMs0akjGKAEGSM4wvYUALx1HAoAKAHR4By3I7U
        ASMGzljke1ADTJg4A4oGOSYk4xgUAPd9rEUAAJIzQAvNACGVo/unBoAYXaQ7n+8etAhKACgCN/vGgB0f
        ANAEDvhiKBg33N2etAELuV2sTlT2oAc8ioMHlf4cUCGqSRkkZrRbGi2GeaYmbHOadyiI9TRcCNpCpI2Z
        HrRcB0LZLEjb7UXAazbnK0XAbgLxnii4Bii4D1cqMUXAljTedx70XAcx+YpRcBAu1yKLgSDhqze5m9yR
        +lIkjUrjBHNAxykZbHHtQIQA4oNFsNb7xoKErRPQBKdwDAHzZFFwANuGaLgJ5m1yKLgNcea5z2ouBLGx
        KDJxRdAPwaLoBPxFZvcBefWkAc+tBmxADuNBI9+lAEa5xk8rQMXeAfl6UAHmqOqkmgCWJgQSOBQIRSgb
        kc0AOdih3KcL2oGN3F/mbqaBC0APQjaAPvUAOLGPqclqAAgLwOGoAQsY+pyTQMXAX6UCDI9aADNAAB5n
        H92gBGcyBR2oGKzbDgUAG5CMsOfpQIMjqOBQAp5QUAQnrQA6MgH5uR2oAkJUN8xLP6UANCBnzgL7UASj
        C8ZoAT55XEan5TzQBO0hdQWPzdKBkJcqcYoAUNu570ARt940CE7470AKT8tAERXb81AAZFdAGH40AQnC
        ZZf4OgoGKFPb60AMbhjmgQ3Jb5e1AxcIvBGT9KtPQtbDX5AIHFVcoUtk7e1FwI2G1iKLgJRcBGIwOaLg
        NfljRcBOccgAf3qLgOTbjh959DRc0Ww7OewB9BRcYqShS27kdqLmb3EjY/M5PzL2ouIenyrg9etFwGsH
        LHaePrRcBvmsDtY5AouAuFX94pJK9FouA05k3ZAXHOKLmi2K+WPOcfjSuhjGhdjnNFwHK0sKgdAf4h1p
        3Aay7TuLbvc0XQCeaT249R1ouAxg7HIYkepouA3ey8HrRdAMc7iKLgSDhkzxx3ouAxZMMRRcCZpMhdo+
        b1ougHeYx68n1FK4CYP36dwJoWyATxRcCRim45HNFwJPNQRhUG1h1rN7mb3EU7gCBSESqUCjcOaAF3xj
        58crxQBG5EbZXo1aJ6AJjb1Py07gRvjcSOlFzRbAM44UEetFxiH3GPai4BvxxRdAMYlm9z2ougHiTbGB
        RcCPdnnIougI2B3ZJBWi4CPg42jii4AW3Hb2ouAu3bxRcBvmBXIAw3rRcBQS0hJ5NFwB+Uei4B0fnjp/
        Ki4CT5K/KcHvRcCsMEcdKLgWIv8AVii4D95HHalcB6BiokB/d/xCncBhJJJk+Y9vai4DAcPyRRcB5OTR
        cBjPhgKLgT5Lc5ouAbjny/71FwDcpOXB2jhh6+lFwI3cqxA6dqVwHKcqDkCncB3PrRdAPilMTN70XM3u
        TDHljFFxEQ+/RcCyjIFGRzRcA3qrZQYNFwJQ7OMseaLoBsiuw2g8NzWb3EN5EY3daQDY+tWnoMcwCndm
        quBDKd+T1ouaLYrnNFxhz6ii6AR3I2jrRdANfEjnfyD0ouA0xeT1IzRdAAlB/iP4UrgKDnnOadwDKdxk
        0XAilfBG0cUXAejA5zRcCMs4PHSlcB0byetFwJCTMSrdqd0AUXAGOF3d14ouAi8Ci4CCZkcjqtFwJhNH
        J1FK4Ctbqy5BAH1p3ArPH5bHHNF0A5GyoJouAuR60XAkt3jV38zv0ouAwsmTx83rSuA9Qdop3QDW60XA
        bwDk/c/iHrSuA9F3rg07gNaLy2JHP0ouA9C7OhBx1ouZvcAxXg9c0riJFOVBNO4DGfB4pXANm/n1ouWt
        iSNdgJp3RQLK2PuZ96Lmb3LCy7V3d04oESoflHI55oAdzWb3M2NH3qQrEx468UBYRSN3WgLDnDljg8fW
        gLDVXc58znHSgLCmZmYqecd6ADzD93HHrQBIowozQBIhBUc0BYXzdpxkUAKG3c5oATzAvDcjtQFgbLBS
        eTQArOV+goDUTzaAD/W9e1AC5J68fWgBASWI7etADiACQOfpQFiJ/vGgLEcj4GKAGKdwzQFhrZzwaAI5
        Oh9aAsNH+rFAAP8AVitFsWthF4UZ4plDW5JxzRoBG/K0aARjpRoFh3l7/unB70aAG0PwOAtGgCeYfSlo
        A+PLHOKYE46UAIOHoAOvmY56UASuRheaze5mxT9aQgK7fm70ARsxZskAe/egByfdGGyPU0Gi2GsrA7ga
        BibiRljzVrYBkrbBx3qtAGKAoxmgAYs4CqcUASjagCtzIOpoAXPvQAgG9yP7tACtKSelACKcvk8Vm9wH
        M5B4FIB6ElQelBmxjM27CZBHU+tAhynIyeF9KAHcHlelACD7xoAc2c8UAN3EcUAMaQ5PFADwR5YLjOel
        AWEDFRg0ATRMCCc0AAwRx96gBGfaFH8Q70AKSSfm60CDrQAZydtAwK7eKBBQAYz1JT0I70DJFJxlgAPQ
        UBYXKnp0oCwc9z8vagLEbgFtgGA3NAE0LfIST7UAROPmNAWG8dBw1AD0yFGetADqBEbD5jQBPbEx4PrQ
        Mluk2kEc/SgQwEsM0ARufLbP96gYFcLigLDkZPKCgfvj90+lAELnYxI79aAEICqMHJ/u0BYjYPKu3hQO
        1ADVAVRuBJ9aAsGFPRiB6UBYY0YJznPvQFhyjauMigBrHnrVrY0Wwm8qcAkn+72qhkcpJIJG0+lACAZc
        0AKybmo0APkXgjmgCNnwx2jiiwDSc8nigBQTjhQR60tDRbD1ZNo3/IfbvT0GNfliQMD0FGhmxUG07u9G
        giQAOSxOM0aANA2jFGgCpGJS3I4o0AaDRoAxuWo0NFsRsiE5IOaNBhtwPl4WjQBN5BxRoAxzuGaNAGKp
        Cgrwe9LQBrTF22gHH0pgIxAXrigBFyV+7gf3hRYBjDzGK5JC9zRZAJt2/NRoBIJSYxt4PeloA+NmCApw
        G7UaAO27eC5z7UaASKoVQzfMD0o0AFkbdzkmnoBJuzyaze5m9x8cu04pCJGO45oAQkDrxQAVatYAz/sg
        +9VoAxs7jn7voKNDRbCb9vAGBS0GISTzT0AM5o0AaActj75+6fSloAwcDJ+7T0Aa5jx0paANXG3jpT0A
        CSnI/io0AXG3ijQAzQBEx+Y5Py0AOTDHglB2x3o0AcXKyEFdvtRoAOBK43f6v+IetGgCXUBgIYnIPb2o
        0AgYAH5fu0ATREbByKAGvI0TZ6qfSiwD1kcgLEdq9896LAJIDj5eD3PrRYBimPaPl/SgCRCpXjpQAyVu
        d4OStADkOxsglj120WAm89mGSoQeoosAKctkEt7miwCSD5zQBG/agCVSCBt+960WAUbu55oM3uNEhjfj
        nPpQIs7SqKxPB7UAPLBvmHANADfMx0P60BYlRsqDmgBfMIOBWb3ATd53yk42+tIBRWi2AMqPvDIpgRzs
        FClOh7UaGi2GPF8vWjQZVYbSR6UaANJI+fuvFGgCMMMvvzQA665Mf0oAjiIEYycdev1oAkzQAZoATI9a
        AIJf9YaLAKkjqANoZaAJlYFQcbfagA3D1FAC5oAKAI+dzbAGP8We30oAdGVCjB496AHDnpzQAUAGaAI2
        O5iO1AEJbZKV9KNABjk5o0AerkKBRoBLGzuyAHjmjQBQNnykjIo0AXPGe1GgDQ+HwOhoAcx8o7QcgelG
        gCFgw4+960Gb3HpkHk80CHN97JOV9KAE8wZwvSiwC+YaLGi2DJPNFhiF8cbiPoKDNliMEdetZvcHuSnl
        lpCJ0UPI2X20ABiEPLfMP4aAJImWUFZByO5oAi4Mhx0oAlxQISgYKSzbV49aDN7iurBvlOFoJHoWIAc5
        Ws2aLYUBQxxwKQxzIGOeOaBibccYoEFAEsDLu2v8q+ooAfOIyxjjYsjc5NAEaMhXkZPSgZIxUxqFGDQI
        bgySqrH7vegCFmKsQfu+lAAsvLYXavrQBESGPB3e9ACkfJQA0A4+U4PetFsMY74Y7elMCPOWY0AIAfLo
        AaG2LnvQA1mLncehoAGl8tRtHBoNFsNXpQMY5+Y0AJQAqHrQAgoAesvlKMc5oM3uLvxQIkUkqCT8vpQA
        773+r4HegByNHnpQBIyiRjjgDpQBEwdjkHigA+UfeGW7mgBcjDY4GKAGJwtADJeooNFsBZM8jJoGRvjc
        cDArRPQze45fuincQ1mIYgAn6VmwFQ5PPH1pAPbk0APT7ooAH7UASr0AyPpQAvPqKAI2Vix+cj6UAIoI
        LZOT6mgBAxUYxQBIpJUHpQA4ZPegABJ6EUAHJ70AHPrQBGwO7nlaAHrgjjgelAh69OaBjkG8tz0oM2IG
        yMmgQvmAcD73rQAgJL5brQIcz4YigYjHIU0CHLyzYoNFsNVW6kErQUISueOB6GgCUOrRhR95e9AEe4vy
        3Ws3uA4Oo2owyrc0hEjursSvC9s1othkT/eNMBR/DQZskcjd1oJEoATfjpQMf5vyrWb3AeZSTSERswJJ
        bkdqDRbCJwTk/jQUIOQKBCOMg0DG/wDLMVotgGqDjn7vpTAcXDLtHAoAiMLdmwKAEwV4LCgBrFc8jJ9c
        UANIDnA4C9BQAZduQcD60ANcEj1PtQBGHIGKAAOHbb0b1NADjkHaTnHegBCAvFaJ6Gi2GMVBJYZWncY0
        lf4Rhaze4AGTuMmkBIpAHHA9KAGsCSTg49aAFLZRVPAoAl8oAHmgCOJdoIoAmto0kMm4chDQBWbGeOBi
        gBKAFLZXbQBEQUy39zigBjDaf1oASgBFkKzr7CtE9AIZXQyEsMr/ABD1p3AFdwBtPHalcBku5yqg4Lct
        RcAYhjx06VD3ASkA9JNpxQBKrgvnIoAeQxOVPB96AELsnDA/WgB6NuUHIoAcV2/N3oAekuVFADgQeW5z
        0FAAchOTzQA0dKAJI3ROSOaAEkcSOWHQ0AIc7Ofu+lAEa43HAwD0oATD7B83y9hmgBqlQPm5HagBrSBT
        hgSfWgA3BuRwKADNAEc/QUANEq/cIJx7VaegDGwWO3pVXAdHOIwdv3vWs3uBJHKZFBYjcaQDipX5ieD0
        9qAIyDIxDn5u9AEc+YgFPKirT0ATeoAKDBaquAZMfB5ougHGXCrnii6AkbfONucAUXATBEYz1ouBEQD1
        Oz0I70XAQff5AX2FFwJBL5bnHei4C4bzCQeKLgTxyFTgnJougHltxJyKLoBmzLMSRtNFwGhwnC9KVwEL
        BvvNs9CO9FwJFkwOcL7CncBfM96VwJEYuMH7tFwF/drwB+lO4AQx5XhaLgOjkKHBPNZvcze48qHk3HvS
        ES8KMZoAF6tQBGetBotiOQdKBiGMOdvZuTQBBJjefbigBmN/4VonoA2SX7ntmndAVQPNIz2NK4Ejy/NT
        ugE8w+lF0Amc80XAKLgL5hHGMD+9RcADb+Mkj1NF0A9QEXDcjtRcBcjp/FRcBSWj68lqLgDJuTH93mi6
        Ai37+DxRdASRoyggHAougHxn5Bk5NFwEJAduaLgOj+6KLgNcKxOCA31rN7gRMpDEdT7UgE3FeMGgCxEd
        0YNACbYy7ZHNAAi7VH9z0oAR/mY+Xx61aegD1xtGBgVVwFYjbRcBqfdouAuR7UXAkGcAEBR/e70rgGfR
        s+5p3QC5PqKLoA59RRdATxtk7egrN7mbJVAV8ZpCHsSxIwcL0oAaJJJvl6BfWgCVNxUZPNAABtYtQA5w
        5XeD1oAapZhknmgB8f3vegze4T8sDQKw6OQjPFZvc0Ww1HLNg8Uhk4ULw3zDtQAnmFeCaAFB3c0AFABl
        MfN8vuO9AAZMHgbfYUAHztyDxQAm8jg8mgBd2eaAI2zuJPK0ADFSny8GgBhkZVUHk0AI5LNmtFsA0uVp
        gNJ3HNADSH7HA+tADJM45OTQAxelADmG9ME420Gi2IS2eaBjDkng0AKCABkjNACMcHqB9aAFQknaaAHs
        NrEUGbHp90UCFzQA7zvlVPSgB3/LSgBwO5mXcRQA5F2qADmgB3PrQBFKDkUABjyc0ARtgMRmg0WwJbtJ
        lwcDtQMiJLRyE8nPNWtjNgRnpVaCHxt5ak9M1mwBZUcbmHJpALkHp0oAC+OKAJE5UGgAHDF+60AOIwf1
        oAaWcHCnigCRCxUZPNADufUUAMbrQA3BP3eD3oAQnZyvRqAJFG1QMigBG60AMD4fFAEitlsmgB5yTwaA
        FU8UGbEm+6tAhU+6KAFzQAtAWEoABgtydg7Ed6C1sTJM0RJI49BQURl45fnYYJ9aAEIA6dKAEBz05rN7
        gKwOFGOaQCzfdAq1sAlUAYoM2HegVgwRy33aAJFIwMcCgLAv3s1m9wHMCT8vB70hDwVMY28EdaDRbDTE
        si4UYVuaCgjdYkG7kL83HtQAnmLIzOOA3OKAIT1q1sApACbs1QEWS3NACZLHaaAGNCAx5oAeqkKADQAw
        7fMORk/SgAZFY5HAoAYMB8FtnpjvQAS53nIx7UAQP940APTG2gBsnUVatY0WwkgyQnZuTVaDFZk28jkc
        Vm9wGKVz8owfWkA9oyTlutADwqhABISf7vagCNxjG9T7CgCQAgc9aAHJ96gCQS7WZv7vAoAr5+dyAHz1
        B7UARgYHBz7mgA6sPrQAku4yEg/ux94etAEThsYbk0ANXpQA08O1WrWAgbg1WgBvK8YNLQBN27n1o0AO
        +O9Q9wCkAUAAKBuRzQBZV1RdxGR2HpQAod5Pv9KAE2Kj5XpQBMGLjOaAEH3jQBMv30oAQDr9aACgAAyc
        Dk0AFABmgBr8jA++fun0oAgzuJUD5/4T/OgBdoXgUADSELigBsbZyelACIfmoACPMd/agBgLMMjg981a
        tYCOVFcg52DtjvT0AUqdxG3GOwqGA1cFuPvetICyhwoBIzQA15UU4x83rQBDIxkIGMj2q1awAy7Tiq0A
        AcfeGR2o0AApk4PJFGgAshy1GgCLMrDa27P0paAAwH46e9PQBzcsaNAEyY+f71GgBt2nFLQCSLoaNAJo
        FQqCMBu5PejQBzhd5CDinoA3Kdxk/SjQCNmjLHj9KNAHxNEAdwyD0o0AF6UaAPWRojwDzRoA5nIPFLQA
        yTzmjQBAfmNQ9zN7kyY+YsMjtSEOgwVIkIOPu0AKvmMM5/WgBeR1PNBotg3Z47UDIZ/3fTkH0oAgZdqY
        oAiaXauMgVatYCMncmarQBoBxRoAu3fx6UaACtmRDRoAp+5+dGgDB0oAXtntRoAUaALvK8YpaAGSwyRg
        f3qegCbXP3WJHvRoBIm4KNxyKNAHtGvkuxGQego0AhPXltzf3aNAEIfrwo9M0tAHRhgW48w989qdgCIg
        /KWKgdD60WAmaJM/Moz7Vm9wIXUwtuQgBu1IBvmt90/nQBLEGwcGgAUYGc5NAApkd+MgUASKpR8GrVrA
        OYjdjPNVoBEfvk9vWloAMdhyOd1PQB6qMYfkD7tGgDgS3Xk0aAGUH3hz9KNADIPTpRoAYpaAWG6LWYFg
        NHsXj5vWgBZHcAYPAoANx8zLHmgCUOR0rN7mbJRH+7Ejf6r+IUhC/wDLIenagBFUSKAB83rQAySM25zn
        JNADkbcNtAhclOMUDDOT70ASKGxxwO9ADGKljt4FADlk2jFAC793BNADHVwxCnA+tABGDznk0AOQcfM5
        A9KAHKFUsynj3oAiLbuTQAmR60AIFyzL2bmgBvOzkYxxQBEXI4xWi2APmPJ+76UwAyYOFHFADGJZs9zQ
        A2g0WwDnpzQMbIRjrQBCeVoAaucUAOMayrjOGFACRBG3CUZI6UAOQ5UGgB1AEiHgUAMf7xoAdGyA/MOa
        AJwR26UGb3JFPyjmgQxj8xbqV4oAeqkKPzoAY8hViKAANlWJ64oAhEe7mg0WwM7hdg6CgYkMQncxO23P
        OR3oATD73xhQOMA0ARngLzub0NADmPPIC+woAeh+UUALQA9ZCoxQZvcdu3c96BCnigBADv6UAK3WgAoA
        MUAIZkXgjmgADBhkdKAEH36AHHrQA0A76AHMpB3H7tADlbcMjj2oAUfeNZvcBWzuJPK0gE34+6DitFsA
        vJ5pgPH+qf60AI4JbigBuDnFZvcBN7jhTxSAXDSfe6igBN23kEkntQBYhhRoXJOx87cCgBHEm3ORgcbu
        /HFADFyVySW9zQAux1G/cNp6DNAB5h9KAEHDlu5oEOaTzB9KAGq28ZPWgZJhii4PFAEqEk7TQISSFi5w
        eKBiqGiAzyD2oAawAY7RgUARP940ARtnNAAfuigBq5xWi2AXn1pgHPqKADn1oAOfUUAMbrn9aAImOSeA
        B/eFBa2G8Do273NBRG3LGgBI+JGzxQAx3IY0AOjyTnFABICXOKAADgIeN3JoAUHPIJY9MdqAHrJtbbja
        /pQBI7Ejk5NADF6UASoyBRkc0ANcgscdKAIX+8aAEoAN5UYxgH+IUANaPyzhTuHrQAwfeoASYg5x971o
        Ag3lOJOfSgA+788nJPSgCMlmYluR6UAIAsvCjBWgA3buv3+5oATJj6nk9aADGOBzQArdFoAnRhtHIoAa
        wcsSGG3tzQAZG5eaAFifBxQBYBLDNAD1lRRhhk0AL5oPQcUAGd3NABsJGUcrIeh9qADcrcrnHv60AMbO
        aADBoAieQqxFAAG3DNABQWnoRvEzMSOlA7jY1KuwPWgLkq8CgdxjY3HnJ/unpQFyJxg7iApPYUCuIsxX
        J5TPcDrQO4qZ+bI2+1AXJITE0EysP3v8BoC5AkmGy2W/2ccUCuW0YOoKrtB7UDuRTd6AuRKCBz930oFc
        PMxxH8uOuaAuG4NyOlA7igPvTB4oFcTBGc9c0DuLtwNwoC4f63rxj1oC4hbLRv1K8UBcEYrIwRjnqQel
        Bm9yUETDkBMdqBD1m8pQ3dqAHlyEDDnd6UARKNpIzQA1chufu+lACuGZwU+72oAmYSAAE/rQAxZCox1N
        ADwd31oAF6tQA6GTgxdA3U0ASRsm0ZHNADiGPK8LQAcjqeaAJEjLKCTlfSgBJNoGF6UAVpORQBVZF3E7
        d5PXPagBF2qWAOR70AJwU++R7CgBBwO5+tADGXaS3rQWthMu/IoKuPUqBhhlu9AXGtIFbOP3f8Q9aBXH
        KTgZ4J6UDuLketAXAMfuDo3NBmxd2/G4mPsPegRIobH3MnuD2oAQFI3yXZg1AEjpGR+7/WgCAoQfLPO7
        k0ASefsjAH3jxVJ2LWxEpO7k5NPmQ9CyhGAKl6kPcZIqeYCw5pCEnwCQOlAEKAlvl4Pc0AOMgEh2jigC
        wjZUZ4NAA/QUANcqCXIyV4oASThF/u9cUAPjIKjb0oAaw8xj6LQA+JgwPGGoAaoZWy54oAkODyPu0AN+
        bs3H1oAs+ai8EZNAEisGUEcCgCaIZ+T+9zQA2OLzmP8As0AOZ33eWPlVu9ZvczYGUbAWclBw/vSEOjkY
        IMkle1ADvNY/d4XtQIUFiMk80DE80A4H3vWgCRJDtGeTQA7tuIAB/i70AJ5uehLe5oARTl80AOf7xoAE
        wCd3IPSgBoBA560AIJMOR6UAPYc7/WgBN27mgCNm3MV9KADaV4BoARXcFgDxQIYxkZc5oAWLdsGTWi2G
        NeUqxFMADbuaAI2kxMooAiJySfeg0Ww6MEn5OCPvUDElaPeeKAImyWO3haABsbMfx+tAEWCPvcmgB652
        igBdoPViPpQA8fcXBz70APZdvzUAN3buaAHAKu1mGQaAJxJE75A4oM3uOJBPHSgQ3btYtQArTc0AKfub
        /WgBqOjKCRzQA1yCxx0oNFsRM25itAxpXAzHw6dTQAxgQf1oAcvSgBrZzQA5elAEqK5UYPFAAAQ5z1oM
        3uTYRRuI5NAgDK3JHB6UAIZCnB60AMZtzZoEPT7ooGL5hU88r6UARs8bHOKAJAQYxjpQAifdFACmQrxQ
        A9CWUGgB3PrQBEf9aaAJU71m9wEGcUgF5rRbAHNMA5oAFk2lhmgBI2yGk/u8Vm9wJYYiVJYAIec96QEb
        uEGFJKjoTQAiksuaAGtJtYCgCZ1M20LwaBD5raW3RXZsg0DIWfy2IA3+oPagBqy/NwSfc0AOaZM8jJoA
        TzQenAoAepyoNAE0XQ0AAiZhkHigA3GP5T1FAB5tAAqvK5AOBQA5kMZ2nkigCvJneaAFXpQBDNJtyK0W
        wBESyA0wCTpQARZ2CgAk6UAMGBGDkk/3aAGfUbfYUGi2BtioGI5oGRZMhynGaAI2DhiGOW70AOXpQAu1
        z0PFADGaRSRmgBAjONzcg0AOI+VQnFAEjFQcOMydzQA2gB6zIigHrQA7cG5HSgAoAjf7xoASgBRHu5oA
        MbehJPoaAGT5wuRt9hQBE8e5c0ARMNq4oAT/AJZigCI89Ts9CO9AARIeRhR6CgA+bGGAH+1QAmYx1yx9
        TQA5CDnHSgAP+roAaGQDkc0AOTB3Y6UANFAD45MHFAE3m0AKDuGaAJFztFAEijKjJ2ehHegBfMI4xj2B
        oAGO4KaAGyZ3GgBhnMZ2+tACSQ4FAFctsOKAE8yg0S0DzKB2IzMDIQPvUBYVpGzz1oAUnKZoCwnCxjdy
        O1AWEiEmDzQAByowetABnPNAWDzjnZ6UBYVndVAB4oAZ5xKqp7UASMu35qAsQ70aQkjmgLEvmxjjbQAm
        4NyOBQFhx+5QFhofAxQAu/fxQFhQu2RBQFhvr9aDNhQIKALEZMcYY/dbtQA4RAv8vAoAiuQFYgfe9aAG
        RMUAJ5NAD5JTJh/7vFADmUIcD73WgBgcq5B60ATA7hmgBcZIT+/zQA0S4c+3FAEwJYZoAOaAHrJgYJ2Y
        6Ed6AHAGXqMe1ADJE8v5fSgCJo9yZoAryRcUARqmxc0AOLbo80ARt92g0S0GrnaKBi80AIy+ZgH+GgLE
        qOm9DIM8cUARkqCcjmgByhioKnC9qDN7gflYeZznpQIsOsmBk5XtQA2OVF3AjmgBisGLEdKAGigC/p2m
        x3rBpJjEFBIAGc1k3qWloU7lFjkJU/LnA4xU3ZVhrTE9QAP7wrVbGb3GtLwuDuHqaoQ/bv59aAEI2nFA
        ByR0wP71ACcdiW9zQBIkvGz0oAmThRQBBL/rDQAxZfKJ96ALEP8AqxQA+gCKXqMHJ/u0AK5dhtwFHoKA
        GhSigHrQB//Z
</value>
  </data>
  <data name="次接驳盒维护ToolStripMenuItem.BackgroundImage" type="System.Drawing.Bitmap, System.Drawing" mimetype="application/x-microsoft.net.object.bytearray.base64">
    <value>
        /9j/4AAQSkZJRgABAQEASABIAAD/4QAwRXhpZgAATU0AKgAAAAgAAQExAAIAAAAOAAAAGgAAAAB3d3cu
        bWVpdHUuY29tAP/bAEMAAwICAwICAwMDAwQDAwQFCAUFBAQFCgcHBggMCgwMCwoLCw0OEhANDhEOCwsQ
        FhARExQVFRUMDxcYFhQYEhQVFP/bAEMBAwQEBQQFCQUFCRQNCw0UFBQUFBQUFBQUFBQUFBQUFBQUFBQU
        FBQUFBQUFBQUFBQUFBQUFBQUFBQUFBQUFBQUFP/AABEIAH8GpAMBEQACEQEDEQH/xAAfAAABBQEBAQEB
        AQAAAAAAAAAAAQIDBAUGBwgJCgv/xAC1EAACAQMDAgQDBQUEBAAAAX0BAgMABBEFEiExQQYTUWEHInEU
        MoGRoQgjQrHBFVLR8CQzYnKCCQoWFxgZGiUmJygpKjQ1Njc4OTpDREVGR0hJSlNUVVZXWFlaY2RlZmdo
        aWpzdHV2d3h5eoOEhYaHiImKkpOUlZaXmJmaoqOkpaanqKmqsrO0tba3uLm6wsPExcbHyMnK0tPU1dbX
        2Nna4eLj5OXm5+jp6vHy8/T19vf4+fr/xAAfAQADAQEBAQEBAQEBAAAAAAAAAQIDBAUGBwgJCgv/xAC1
        EQACAQIEBAMEBwUEBAABAncAAQIDEQQFITEGEkFRB2FxEyIygQgUQpGhscEJIzNS8BVictEKFiQ04SXx
        FxgZGiYnKCkqNTY3ODk6Q0RFRkdISUpTVFVWV1hZWmNkZWZnaGlqc3R1dnd4eXqCg4SFhoeIiYqSk5SV
        lpeYmZqio6Slpqeoqaqys7S1tre4ubrCw8TFxsfIycrS09TV1tfY2dri4+Tl5ufo6ery8/T19vf4+fr/
        2gAMAwEAAhEDEQA/AOCr+kD+W3uOjJQ8c564oETgBeM0APTrQBIchgSflqWA9pAJTjgUrgDHcc0XAkiY
        gFOgbnNFwHwuGUnPtRcze4wyFTyfl9KLkkisCoPQH1rN7gOyKQCFQo3MMg9KAAeYwzmgAUHec8n2oAk3
        kUAAOWzQBLQAUARs5DEUAJv28/3qAGP+6bjvQAnC8Zq09DRbEEv+sNVcoQ/couA0dKLgIe9UgIBTAjZf
        mJHJ9qDRbETHLZoGRsMk4B3etACYYdTzQBGzKhyRknuKDRbBtb+A/LQMTcSdpPNABjZxQAinMmKDN7ku
        SflPGKBC4VeMZNAB9OB6UAIWI4oGPjOTmgQ9iC3H3vWgBvI6nmgBjHYcjvQA4qVVcnK+lABJyxK8CgBn
        PUnK0APQMT8pwvYUASSMyDawOaAFjyUBxQZvcawO48UCHLjaMnZ6Y70ANdZCxwAo9BQA5RJtHP60AO57
        8mgBDL5XTnNAC5duAeKADaV4PNBotgoGSKH28HA+tBm9yMuyyEHn3oEKxy1AD4+AaAEGB3yf7poAXzCP
        4QPpQBIpZlBzigBrA55oAcudoxQArx7gp60AKxKHFQ2AgJPNF0AcD74yO1FwBDgsCeaLgCHJZTRcB0Q2
        8UXAex+ai4EbsYjk/dai4DiFULtP/ATRcB2fn5AX2FFwFY/MaLgJzRcAAPflfSi4CZHbgUXAUR55ouAY
        VfvDIouAb1Y7V4Wi4DJQ0fCnr2ouBCYSOvWqQBjbxTAjf71ACFypxzxQBGzoTluTQA3I7cCgBjZ3ZPK0
        Gi2ADP3RxQMORQaLYY33jQMYOJlPagB3c/WgBMj1oAPvfICN78qfSgBA8Zc8cjg0Gb3HtjPAwO1AhPlH
        BHP0oAD7IMe9ACfUY9qAEMm04oAazbjkDBoNFsOXcANxyKBjmIK8dKBkNAgoAGxhcfeoGMkzuOetBa2G
        0FBucdDgUAAkPfk0ASIdy5oM3uOxj5qCR0au53ADB9aAJwGUYOM+1AEbybWyf9WPvD1oAXzTtXJzQMmU
        7m29n5oMnuHmYkNAhWbc2aACgB4d1UYOBQA4Enk9aAFyoHKA+5oAaknzts+X1oASRg4yOlAEROQq0AOI
        2nGc0AAbd8vagBzRAKP5UAMXCjFADGDFjg8UAIXK8HrQMepdhw34ZoEOG4/KfzoAVhtTFAEbh9vBwKAG
        KxAweTQMRpRuGWI9qBFgyZQYyw9aAEViyhSu0evegA2heAdw9TQAxs5NACFdvzUAAYsM0APWQIMPyO1A
        BuJPJ5oAXG35u9AEbSnccDf7HtQA5X2qCDndQMXAXigRJGUB5HNADjgyHHSgB6vufb/doAXd50hzwRQA
        9iWAJOVqWzN7kwkAHyjildCFyG6D5vWi4Bgjr1ouAc9MAD170XARYRI+N2fc0XAdLJ9iG0c/Slc0WxSk
        fzHLetFxip+9G3ptq0A1wAxNMBvm0DI2bLE0ASbyLdhjNAhPPcgKZGRB0296AJVkkAHOE9KAFDhhnIoA
        B97pgf3hQBMsPmqcSnA9aAItsmzAbNAEbKXXDHlaAGJLzwMN60Gb3HGRs85JoEBbueM+tBothjABiR9+
        gZCxySZOc9KAD5h1PNACFiOKBhknvQIXn1oAOaADPuKADbv4NAEbIY2x1Wg0WwMAF3AfhQUJGS2TigQ+
        POwUAOjTLsaBkchdXIU8UCGrMxfa1AyUPt4oAXO7vQZvcQhh3xQSPjQucH+GgCVZCX2f3qAHlt5z+FAC
        Yc/dPFADy7KqgcMPvVDYEpkWQKqjBpXAWQPFt+br70XAlCbBnOTRcBM7uadzN7mYv3qsHuTJ+6dnHVqB
        CD75oAsJOm0Jj5h3oAdt38H+GpYDo8SHBOKQD2AjYrkcUAIHI7lh/doAUnPO3b7UWM3uOjKA/OM+lArD
        2w7EE/drN7gOhuFBOUB96QDvNJOcfJ6CgCRWDLkcD0NACqMZZTg96AEDbhkcD3oAXmgLCc55OR6UBYN+
        PuggUANeQ46GgLDVOVFAWDIoAYy+Yx9BWi2NFsRMdzZpjG0AGaAGv0qkBDTAjclT8o25+8woNFsRyKBj
        bll9aBiNjPLke1AEEx2cg7s0DGbdsYFBa2EU+Wuf71BQMAAAB81Ah2VH3hlu5oAQLhtwXC+o60Gb3JQS
        wyCW9zQITa4+ZTQAAlmy3WgBWfBoGAJIzQIMGgA5oAMGgAIIGe1ACbi3y0AGzPy5Hy0AODB9qj7x5zQB
        JPdtMFD8dt1ADQzjAViR2oM3uSxSHBzyaBAOm7oTQAu7dzQAUAFAEbcsaAHrwozxQAu7dx2oNFsSQeWk
        o3jPHFAxjfeP1oM3uNeXIVADkd6BChmWdQeeOtAEitkZPrQAx+tAD0+6KAFoAerZG2gBcbeARQAm/BxQ
        AuSec1LAXn1pAB+7QAioGAwPmoAXay8E5NABg0AJyMv3TigAA2HlfMz0B/hoAkSP5QSxb3oAOAcZoAXj
        oB81ABIzJGoIOfWgBY23ZNADc/u3HfNADXZw3ynigBVJI+brQA2XnHAA/vCgAK7fm7f3u9AETSOTlWyP
        U1SAASRlutMCNo2clgeB70AIXaRAQcN/FQBE/RdqZHrQA2TO48Y9qAEZSE3UGi2GiZljBTgtQMFDBRuI
        JoNVsNbk0ANyW+XFAC7dvFAEblAxyOfpQA3g9BxQAgxuOB83rQQyUOU4f5vTFBIu2T7+aADJPLdaADbv
        /CgYoZSMkEn6UADY28cCgtbENAwzQMliXeDnjFAFeTezkg4FACb2UYPPvQAhOefWg0WwZHrQMAd3y0AM
        c7GIHSgByT7FB9aDNkqtkbaBAJNrmPsKAJkk2ZHFADSSQpJ+WgBeN+RwKAJuce1Bm9wGT0OaBD1KbcEf
        P60AO24G6gQEgplxkHpQAsfCDJ5oAJGyNvagCNFKnnlKAHl+flBxQAmc80ARudhz60DHq2xQKAF3l/lH
        D/wn0oAYy4Jx0HWgQikoSe9AyJyZMNg0CJB90cAD+9QMN4HAkY/hQIN57ZPvQMYwYsSeV9KAHryvy8Cg
        BrFQfmGT64oECOwb5OF7UAPZ2J5yTQMTDnkUALhu9AEbLJuPPy+lACFypxigA8w+lADo2BPAw3rQBIwY
        HnrQITkZbqV7UDDaR/OgQYNADjIVVR6UALkM+SxFADml8s4HIP8AEOtADkGVwp3Ofut6UASoRtGKlmb3
        JFkwMZpWESrNhR/jRYBfN/zmiwA/Cq/rQA+Rw8Q4AP8AeoAqsMLyd3uaLGi2IelFhgkmCRVICInJyeKY
        BQAxuCecUAOEpWMN1K8UACy4AoGOLZSgQsRThCPvcmgB7Sjdx06UDHrKcCgQ5X2kt/eoGMcbV9qBEaZ3
        HJ+X0oM2OaUZ+U/LQIBKrcEbyPXt9KDRbEbyfxAfK38XegZGyEE4JYepoAa3IHegBxzmgBvmKvBUk0AL
        ndyOBQAc0AMdlQkkEmgByt5ihhwD2NAxeaC1sMfrzQMRZCpIoGNBDdWIPoKAJUPyjBz9aAGt1NACYoEN
        H+soAUkpITQQ9yQPvG5wSD0oESRyFAQetAgVgw4+9QAu9l4PJoAesm1Q3egBWfeoapYEueBkAD+93pWA
        UYHQ59zRYBC+3iiwEqTHaKDN7lVEDQrj73rVmgiAocE80ATAg96hsBTjoB81K4Eibtozgmi4Ei7FGSPm
        ouBHvR5CNpxTuZvcerhXIXoKLiHO27BouAM2w5Hei4CbdpxWb3AlQoFGRz9KQEiyYUbRxQA5SWLGgBFH
        GMc0APJ+VaAGySbW9qAE83jgYb1oAPNbvyaADzT6UAKDu5oAil9e1ACvJhcVonoBEDl0NO4DfX60XAYx
        56ii6ATJ9RRdAMkPbPT56LoCJuVz3PNUjRbEe91DAHApjIVLEcnmg0WwZPqKChkkpUFupT0oAYpyM+vN
        Ahc0AGaAJF+6OaCGGSnI53UEi4K8ZoAOaACT7i0AIOnWgCX/AJZCgCPk9DQAmH7GgBdrfdb7rUAGQ33e
        BQAZXuMmgA69OlACpEJC2e1ABEcfP/c4oAmXAbrQA9iM9ahsCFw5fIPFK4E3O9MnJxVoBP4KYCLjHH3q
        AF6ff5oAPl/hGB6VDYBmlcBF+9VoBzdaYDS5XigBc55PegB6ncAlQ2A4DHGc0rgFFwCi4BTuZvcDg8Af
        NRcQYI+91ouA9XIGKVwFBJ5zTugDPuKLoBBIVcii6AcxLHNF0A0yFUce9FwHctg+1F0ANIQuOtFwGIOd
        /rRcCbzsjj71FwFJbblm3Z/houARsOeAvtRcBjkFePvetFwGoG2jJyaLoBeaLoA59qLlrYCfl60rlEVF
        wBiNvWi4ESckr2bnNWtgIjkk0wDIY7SxFACyLiNQDketAEchMYyT8rdqAGgjG0DC0ANddo2ig0WwxZCq
        4oKF800AHztyDQIjbO45OTQAm7ZyOd1AwAxwOaBEqZCigBABv+8R7UAObuc5HrQANwtADVcqoFAxd2eS
        etADHKBjkc0CGBFZ8jgUGi2HurY+Vhj60FEGD360CHH7lAyE5GXPRegoAMf3elAB5pj6c59KAE3bvl7U
        AATaxFACl9shGKAHg7qAF60CLEJTyxkZNAxxAc8cAdKBCA55ySfQ0EPclVig6YLdhQIXBXigQ9ZCoxQM
        XOeckn+7QZPcMbzggLjtQIUshQZHNQ2aLYaMY46UXGLvIGE4PeqQDWkyeAcUxiEkqPWgQ1cgUDHLn5vS
        gQ1ZNvbKD7w9aBi5Y8n9aAGmYx7sc59KAI1H7oUCJIs7BQA1pCGIoGJ5jH7vBHWgRIrblBHH1oGMbIbJ
        Py0CDg9OlADS0gPy9KAF81h160DHqQyglyPYUCEkDkcfd/vd6AI0BDcksfU0APzhm5oAarCMZbkHpQMU
        SsevWgB6zfKOzetACMJCc5oEJtkzjPNAD1wFG8ZNBDDPocCgkI/vtQBIkvlg470DJEICiobEAkw+O1K4
        E4ZCMkc0XAkUjHGAKLgSJtYYcg+gouAFfL+UkGi4DGQE5ouAx0QDnrRcBv2ePygy4DGi4FeUEEA8mi4A
        IWkZucAetWtgImK7cMMt3pgJkeWMcCg0Ww0sCqqy4H96gY8qAcIdw7UGb3GlX7UCH7yqqD1FADxN8zUA
        OQnaCxwD2oAcWycfwfwj0oAZhVZhIcMO696hsBCQU4G32pXAiOB98ZHarQD0B2jPJpgOJLKFXjHWgCIr
        t6cL70ARvIQx70DHIxZQc0CHc+tABz60AGT6ig0WwZPqKCiN5CrEUANYlsEnK+lADjjPHAoLWw3ekb5I
        5PWgoUgCT5elAgflX/CgYebjgUGb3DcG6feoEIpO/k5NAhzOQfagY5WXaNw5oM3uL8p+6MGgkfHkH5ut
        AD2G9jz0oAkhZCCrfx9ahvUBmQzDHSlcCRv9aaLgDdaLgOWQqMUXAqxvhQMVoA7OeaAJE5X7oA/vDrUs
        B8blTjduSlYBxJaQlThfSiwEo3Y55NFgAuRxRYzZIrptCIDvf75oEBIzx0oATqwxz9KAHy/Jh153elZv
        cB4bI29KQBu2cA0AOjl5oAkaUkkDlz90+lACBg3170AShoxH84z6UARbtx20ALt28UAFACZHrQA0kDJP
        3B973oArj3NaLYBd+KegDHJJz0+tAEcnTmgBifdoAY4wS360ARyS8cAhvXFUjRbEOWIyTzTGNOfm+lBo
        tiMf6sUDGLwTQAg4HNABQAUAPVsgL2oIZKo2jGRQIVugoEOOc0ANwep5WgBcp6GgBMd/4PSgBev3eBQA
        c0AJksdvpQMAu1iKBDmyCX7r0oGJgigBV6tQIYA3Y0DHYYdaAHr0qWIkVSIWbqM9KVgHFg+COmKpAFMA
        oAOO3DUARssm48/rUNAJgjr1osBIn3RVIA8wjimMGJIBNAhxHmEj+7QAm4gZH32+6fSpYEigKoxxSsA5
        vuUWAarlVApWQC7s8mmZvcepG3A+9QIac555NAAzkLjBoAapyOeKAAkHp96gCRQVUMTzQAoYtzQAj9Fz
        QA55NoC9/SgBqtkZzigBc+4oAM/7QoAM+4oAMr35NABu3EqBwKAJYl2KR29aAIznJ5oAjbrRY0WwmaLD
        HRlQfm5FFgGzorsSg4NKyAhUbRirQC5pgNH3moAjR2V+fu+lACTsrAEj5T92gBnzDqeaBjOSsoH+sONp
        9KC1sRM2Tj0oGSIuFwKAI3OxsjndQMjdSGwpwe9ADt3yrtUEUALuCPkABm9KAJfMK/IT0oAXHHtQIQEZ
        yfuD7w9aAD7v3xkdqADJPymgYxk3MV/u0ANznmgBx27BkZP0oLWxAcZ46UFCNIRgCgBxO45oAjbOetAC
        ElOf71AAVxwTs9CO9ABz6BfagAw56HigA5HU80AGCfu8HvQA9SNu8D7vAFAEivtGM+9ACq+98UASs2wB
        R2oM2DTFWBAzn0oETmgBo++aBEvWgh7iZHrQSGR6ipZotgyPWkUMkfBA61SADvY5HSmAnmbeP4/WgBfM
        bv1oAdGxY4P3aACQKHITrQBE4OOeTQIWLOwUDHc+1AEb70bKn71ACbtny/xetACKSXy3WgBx60BYKAsF
        AWEzQAqoCWNAhANoxQBKgO3gcUDGN940AJuTHIyR1NAhPlk6dB0oGG7dQAb9vDAkdqBEiFioyRmgYx3M
        ZMndeKAGvOWCg0Gb3FK7zj+7QIPmYfKCD3oAkXkfLwKAF59qloQ9elKwEqPhQKVkAvmU7ASwKrNudQF9
        e9FgJ32hj5ZyvbNFgCJBPKkZIAPNFgI5YsyN9cUWAhkTcMH+H1osBANxYsfu9qLAMnWaNgWOQapAAGC2
        KYEe7cQtBqtiWRccDnFAEaSbJE9PWgh7jlIZmO4igQigkcHIoAB940CJRwCQA/rn+GgA74BLUAOQYz2q
        WAwc0rAMYHcSeVqkMQuw+7wvamIepJHzdaAEcBxjOSv8JoAjbLLyu0+goAavCjNAEgBCg9BQMa3Unt60
        AJQWtgoKI3+8aAHLjaMfeoAY7lWIJ5oLWwgZD1GTQUSeaojABGPSgBi5lLbTt29Se9ADVYOMgcUGbHj7
        poERxA+lAEpdlZc/doAkfEzZHCjpQZvcaJGI6ZoESJkqD0oELg0DHr0qGhC7yBjbgf3hRYCRDlepPuaL
        ALtc9OlFgJFwFAYfN3osBW2bBx98/dNDYBuD8ilcCRTsUEc560XAs2tnJPkxgYXkk96LgQyKROwxz6Ci
        4EyN8o5FFwBz0ouAvm+U/HOaLgOOc0XAfkrGNhwT96i4DURlPy8CoZm9xzZzz1pCEoNFsLtwN1Ax6udo
        ZOD3oM3uO3B/nA60CE8wn1oAQbmbI4PrQBMAwHzHLetAC0ARvHuYmgCOQFRz930oAYDHj7v6UALgP04A
        6ZoAYx+YlwSO1WnoWtiJtwOWORTuUBYIuV6N2ouBEyOFCA8NzRcCJiSnJ56UXAiPJ2f3uaLgGSatbGi2
        GSnA54pjGKSBwN/qD2oAYTHnu3vQAhIHI4FABz1J+WgCVGj2jigBBjfxwKAJhnFQ2ZvcOfalcQc+1FwH
        qoIyTRcBrDBwKLgJyPSi4BzTuaLYSP77UXGO5qkBE8hVsUxjXkOBwaAJgSwBoANuPm71DYgBLc0XQx69
        KLmT3FMjQ8n7rUriDzMcAcUXAkVsqDRcBeF5yPzouApbcgNFwISrk8Hii4Ccj7x5ouAuHP3TxRdASJwo
        B+/3NFwHMTtGTzRcBq9KLgLh+xwKLgOj3A/Mcii4EhIJ+XpRcBKLgHQUXAKLgNAbecHii4DmHPzMQaLg
        HHrn60XAKLgFFwJFPyjpRcBeR0Af1z2ouAm6PG1eZv4WNFwGN1ouAN92i4DIygPI5ouBMHjPy7ePpRcB
        cbeF6UXAcmSfl4Pei4D5ZcqFAOKLgRsCDii4CMRtxkZouBFuQdRzRcAUjLEdKLgCEbDzRcCsw5NFwE2Z
        GaLgK2AmM0XAE+4QD85+6fSi4ERCyJgcMtWjRbEeSfvdaYxN3l8+tAxRsXgjJoEIcH7nHrQaLYjYjccd
        KCiNxyeOKAG0CJFGF6UALQMerlQM8rQZvcdvVhlRg0Eh8w+8cigAyO3AoAY5Bbjr60Gi2G4P3Sfvck0F
        CkuU3g42cAUARFSpwevWgBOO33vWgBUyCQTzQAxulADFzjrQAEN68UAOPC4PWgBq52jFAC7M0AGCOKAE
        L7TigCRMsoNAAHKuRQBOhySTxmgBYHKEjGKBDhId54qWyGTId2TSuSSQ8KaLgRknJwgPvRcYZb+4tFwD
        n2B9KLgBYjilcAyT3p3ATPuKLoBeT3FF0AZI64qkBG7kMRTAepJUHigBjSEMcUAJndzQWtiN1fccHAoG
        N3leDyaAJUbKigY7KDqOalsAYjbxwKVwIlcqWGKpCEHIzimAb8Hy+zUEMkWTzFwBhulBIFpYeN2VNBot
        hjA7jn7vpQMesaOoVvkRuRjv9aCGNcgsdq7R0xQSN4PT73egB0crZ2HnHegZIetAgoAjdjGxIG/d1B7U
        DFjfYcA7h60APaUk0AJ5xTnB+agBdrn7p4oEOR2RsHrQMmSUnNQ2Iem0LuI+Y0rgTIwZQRx7UXM3uKp5
        ai4hFTA3daLgL5jehouApHmrz1ouBWngdAFU/K3JouBA0zZ+c8dMUXNFsG/zeI+AOtFxjJSIyCvT2q0M
        QybvnJKe47/WmIVbpXUiRevQCgBiymFR15oGOWSSMnaeDQIQSKgwwy1AyRZRgED92PvD1oAUOVfcf8ig
        BWmZiSfumob1ATLPzGdo75OKVwF/HFO4EbqXYg9qLgNEp3dKpATbtw5AA/vd6YgHThtw9TQBG/zsQT92
        gYhnYrg/dFACNKqxrj/Vj7woERtIc80Gi2DOaBhkUDE8zHFADGO45oAcreWo96AGnYshBGTQArctn+Ds
        KAHQ4y2BgUAKcZoAkQ/KKAF3bjtoAY8hUbOwoM3uLG5VAKBDvnPIOAaBEiBsc8mgYvmEHHWobMnuPWU7
        RxSuIXzT6UXAeJHxxxRcBwyRk9aLgVd+09ST/d7U2BIrFhkgKfSiwEkKNIxTcArUWAmVpI1KI5G3riiw
        CIkkieahIK9c0tAHYjXjHz9zRoAg+/RoArYzx96jQB6ZC4JGaNAAOQ5FGgEu7PJqGZvcUSIvBGTSEJuD
        HjjPag0Ww5O9AxooM3uHmmLp3oEWIj+7FACONzbOzc0AOU/KO3agBjvhiKAHo2UBNAEMnMhxz9KAEMio
        uCDmgBqspGT0PQelADZCYxk8k1aWhotiHG3iqsMjd9rH+dFgImk+Y8UWAjYknNFgE8vdzRYBjI4Y4PFU
        jRbCSFVRfNGT2pjGdjQBGn3KAEkBAy/Kn7ooAI/uCgBVch+lAybOevFAiRTx1FSyGOXq1KxIig4osAuD
        RYBOaLAG3fx6UWATdnnIFFjRbDRIQzd6LDFjYlRVIY1x5jY/u0wHq2VB/nQAufcUAMYOWODxUsQq5AGS
        M0rDJE60WM3uPYb2I9KLEiZ3c0WAKLAGU7jJosAJIASB0osAnznnOPalZAKEJGWPNOwAVdehwO2aVkBI
        mdoz1p2AY4wc0WAev3RRYBc0WAOlFgJE+6KLALmiwCNj5cEk/wB3tRYBxPPIC+wosA0lTwPvUWAXkdTz
        RYCNvvGiwDo+hosAq9KLAKSB1OKLAJ5p+72FFgFA4osAuD6UtACjQBo+/TsBKOnaiwC5+lLQBN+KNAAs
        78A4A6Zo0AA7Nyx5o0AAiF8sOaNAHuseKNAIWAC/KOKdgIaLAK33aLARt9yiwEWDRYBOfaiwCP2qkaLY
        R/vGmMa8Q8l2zye1ADFPzflQAS80Gi2ICOaCg3OOuStACArvJYHB6CgCwMiFsnmgBH+9+AoARvu0GbGr
        0oFYlT7tADG5Y0BYSgtbB1R+9BRJt2gMaAGMvmHd60ARMMMRQA0rghqAElfDlh/FQA1RtJFACAgD5+R2
        oAUYX5n+b2oANwbleF96AEU5c85oAc2dx5oATco4KBj60APDvj5flHpQAvONxOTQAAk8seD90UASLIY1
        xKd3pQBKkr7R8ob3qWZsXMjc/d9qVhWHrnAyRmiwCmTbxmiwWD/bzzRYLB1G/uaLAAYtznmiwDW+8aBC
        Ept5HNAxYyNgxwPSiwA3BJYZHaqQDee55pgHGeuT/dNAB9QF9hQFhWXC7hzmg0WxDndzQMQH5zQAuR5h
        5oAeeq1LAc2BKS3IPSlYBkmd5ycmqQDfMKnnlfSmAxgCS6jr2oM2OWXKigQKcsTQaLYUn94aBko6UGbG
        P940CsNzn7pAPfmgAypxzsHbHegAdX+Xjb7UAKXK8HrQMUshTkc0CGrjHHSgA+Ynhhj60AG8rwTzQBIs
        jFRs60AClwxeQ528UASAKG4YgVLESiULwDn3pWAkSQg5wcUWIe49jk5osSKjuDwePrRYB5lOeTk0WAaJ
        Tv8AeloAjl5ZDGDw1GgFeS1Z5D8pY+wzT0NFsQOphbAHWixQEbUxVgID5cY96AECeWuc0AMZtzZoATzN
        vFACiZe/JoAes3Ax0oAXzTQAnmnNS0AecvcEmlYBdjSfMg3A9m7UWEI7mMBd27HeiwDi27mqQwpgIXKj
        2HegBQykZK5P0oAjfG44HFAWInHzGgLC7gyqoGD60FrYR1KsQTk0FDelABkpyOc0AGADjfg+goAYw54O
        R6mgBOfUUAPVyBigBTLj/wDXQAZ3c0ASJ90UACviZRQA4nJJoM2PUjaOaBC5X+LkdqAFSQxE9yfSgByA
        7MD75+6fSpZk9xrPhsAUrCFSXBosBPndzRYCRDGF+Z2B9BRYCvyB6UXRsI3IXvRcRIv3qLgSB3D8HApX
        AfJLIg65zUPcBiuyjB60hkyHctBk9xc0CBerUAORtiA0AODmQbvWgB6njrQAv3B5meVoAM559eaADNAC
        g7vloAN2zj+tBm9x0bZOaBBI+HOOaAG8nnFACkEJk/d9KDRbDRIoGEGDQMMnq3X1oAYz88cigZG+9hkH
        FWnoIhwR1607gKRldn96i4EbHKUXAhOadzRbCHd2P60rooBn1FO6AbMCVHei4iJ5NoxVIY1UVwGZiE/i
        HrTEHT5c5HY0AKRhcDnHpQAxA+eDgUATiPPJPNAxFXD1LETDOKVxj16UXENZiDSuMTJPencAwaLoBkm0
        dRk0XELH9wY4FFxjTzKnfii4hAOKLgLJ/q1ouA1ui0XAlXOOtFxkcoJI70XESDOBRcYuCaLoB69KLiGt
        nNFxjl+6M0XMnuKyjarKPmpXEDEnlutFwA8gY5+lFwF2PIxCYf1B/houAqKIzjdu96LgSMcHLnK9hRcB
        KLgHydxk/Si4CsVC8jj+EelFwGElFXPJNFwHkYOKLgPU/KKLgMb7xouAmMc0XAM7uaLgFFwCi4D1AVQ2
        aLgMkZWwSMmi4EgIwMdKLgBl28UXAmjZGQ7iQe4qGBCJMDC8rSAUHdzVp6AC8FqdwBRxUMCxEkckRDtg
        jtSAjAEnAOQvTNAAE3NuPFADnGBigCLBx0oATDnoePrVp6AREESHPWncBW60XAif7xouAH7lO5otiJRv
        LZ4xRcYiksM0XGLzRdAMbrzRcRE/3qLgO6Rii5otiPNFyg2Pjcp4qkBG5LMS3WmA7+BaAJweKAGN941L
        AbSuAE+XyP4qLgLt2j2ouAE5UUXAYmS2FOGouA9g6n94c0XATcDwOBRcBjLhiBRcBNgPfn60XAiYbZCK
        pAEnJFMCN8iUlj8tAD0RXbK96AGyqVc5+7QWthpCjlRg0FC5JGW60Gb3EOOww3rQIeGZRg9aAFDZ7igC
        VQdtAAmA2WGRQBP5ihV2DC+lSwJCd3NK4DR9+i4hwG9mz2ouMauWGVGD3ouApRwdwOF9KLgGdw4HzUrm
        b3FwR1607kj1zt60XRothjjad1FyholbqeV9KLgIJowx4ouAsjBiCOlFwHNytFwImfC43EewqkBCZMHu
        aYBnPNABQAedj5DwKAHq+wY6UAOzmpYDGGGyOppXAbkvyvB71SEIWXPBApjFEmOBz+NAATnmgB6vhRUs
        BrHJzSuAmUH3hz9KpAICCxI4ApgSiTzfmPU0ALvI4oEG7PNAw57/AHaBDHABLCgY3O4ZoAer4AFAEkbD
        OW5B6UCHs7Kx3HK1DZD3EjxK7EDAHrRcksJcF4gh6LRcYqOZAAaLoBSu3ii4h4+4tFwLKoIozM3PZRWb
        3AjRhbLyCWbk0gF+0yI6NACGA5pdQKs27zGyeTya6IjIZI3YZ4UH+LNJvUtbDFG0Y3bj6mlcoSTkHvjr
        VIRASU5xTAQMZBu9aBksSAg5OCaAEChhjP3aABWyxNADmPO/+7wKDN7joxhv1oEPeQqu4c7OKlsBEK7R
        uHJ56UriAorHI4HpRc0WxG7bGIouUKsh8pkJ+VjnFFwHmfP3enSlcAB3c07gRuRuNFwImVyxKnii4AmR
        kHrRcBCN6YJ6VSAPOKRjHU0wI8bfmz1oATzC/B4oAGG0ADmgAw5k4PFAEuVHDjLd6AGMGYkpnbQA5HKq
        AeT9aAJIzuOaAHnk8c/SgCJ+WNAD1I2jHDUAPQmMgk5JoAez7DgGobM3uHmmlckRTl807gS4Y9OlK6GP
        WQouCefrTugICCDy24UWEPQjPHAoAmoADyq4oAl6AVm9wCkAj5YLsOCOtBDHFgxwOlBI9QFXFAEiqCM5
        oAdgjigBo+8aAJCVDDdyKAHvtZ/kHHpQAgTcM0AB/dfjQAjxDA5oM2KRg49KBBlO5INAEiIZFwh/E0AJ
        JG0a7W5IoNFsQHNAwbOzk5WgBqkY44HpQA1utWrWAib7xp6AJTsBG3LGiwDJOBzQaLYhBTuMn6UDA47c
        CgYjTeUvHeiwWIm5AqkFhz9KYWGL0oCwDJb5eD3oAe2CTtHFADl+6KAsSKeOoqWA7n1pWAOfWiwB8/Y8
        UWEJx/FyaLDEaTAAGcCiwDixPOaLARs25iuc0WAeo2rjNFgGySEDFFgsNQlgOOtAWDNAWAHBOeKAsIHK
        jHNAWJUJZQaLAL8x+7we9FkAm/HAHFFgJFOVBoEOP3KLEMTfiMCixIitvGMUWAcH8gkDJzRYBYyq42j5
        j96loBIyxMxGMBfWjQBBGJ+RwBRoAYo0AN+3inYA3Z5osAUWAKLAFLQCRPuijQBjfeNGgCUaADDIHejQ
        BW60aAIIwxyDkn+GjQBdrDqMD0FGgCcHp0o0ABj+IZHajQCSIhAcEtIe3aoe4EbM0bFWGCOwpDJEbco7
        mrVrCB+cU9AJVzgVDAY33qQE0eCgAHzUDGShgRuORQIUvz8oOKBkb+Ywzn5fSgBq/dFWrWENk6U9AGL0
        o0AY/wB40aARtnPFOxotiOcHaKLDHJnaKLDFyfUUWAilYsQtFgBkycZ4XpQFiNm3Emg0WwgKZywyg+8P
        WgYGUxdB1qkBGw+amABiOACfpQA9clQcUATAHyxxUsCPo60gEFABjngkn+7QALksflx7CgBW2jkfe9aA
        ImJY5PJoASgCRPuigBrIrE44agBMKvDDLetUgI2+8ccCmBGwDMd4yBQA6OVVBlXgLwBQAqSKVJcjnoKD
        RbELAgDd1oGKRvOPSgze4CXH3uR2oEKCSMnk0APVo8Yx8/rQBIs5QBeuaAFKOvAOBQA+PIPJ5qWA5nw2
        KQEiHKg0AOoAeudo9KAGNgnj73rQA5cgckZosZsax5NArCHI5P3aDRbCOd2ABgUDHEAHAOaAI2KbjkZN
        ADSR24FABvxQApk2pu71SAhA81t570wFYAHGaAEyPWgBjZycDf8AXtQAsY3nrkDuaAHk7jmpYCEHoOJD
        90+lIBWI2cGqQEDFMnIyfWmAkRBkOOlAE0pBoASN8IBUsCeJBMDkgY9aQDHOF5qkBEc5pgIXxwAd3rQA
        5JWztagB7YBoATfjigBr5YZxQAkTlOv3aAJGYMS6j7vAFADQ+x8UATA7hmpZmyRZVQYIOaQrC+bn7ucf
        SgB6uXGD2oAFlJfPJP8AdIosFiRZTu5G32FFgsTPPJIgQdFrN7iEaV2C7fvD71IZagvEgDBh87j5D6Uu
        oilcMGckd63iBXk+4tD3NFsRNjPHX1pFAjmAlzkqfvY71SERsSVyeppjIS0g6dKAHqx27z95eKAFxj+d
        ABmgCRPuigze4tAh6zIq4PWpYWATAvxwKQWY8tuOaDRbETkBjzQMiYjd1oAchG0c0AOWUxk45z6UAA2g
        fMOfpQAyQE/dOF9KAGhSEBJy1AEe4tzmqQCr1NMBmDkfWgB8igtmgBo4agBWABLZoAAxYZoAlRvLQn+9
        QAxAFXFADuv3Tg96AJIzkHy+PX3oAjYjJxwKACgCRPuigAIO4VLM2S5w9IVhxIzQFhyn5eoosFhryKrY
        K5PriiwDVJZskUXEShcDdRcBxbcoNFwBH2wsKVwJi25VPtUMB7n5aQEOCeccUASIeU/GgAHSgCRcFQB9
        71oAlXIXk80EPcXnGc0Ei4NBoth6527lOCvWgYF9sbhRx1oIe4u4dX7jigkMHvyaAFQdaAG9OvFAAd6c
        g8elACmZinzdaAIycrmgBq9OtADD/rTQAr/doNFsQnjrQMZI5UYq09BjFfChqdwIZGZ3LH7pouA5Txxw
        KdwGPndknK0XLWxG+NxxwKLlCKQCeaLgIOlFwDds6dWouAEBOM0XAkQ/KKLgA+/RcBcrvORn3ouZslC4
        G4cr6Urkh1+f+E9qdwGsd2G/h9KLgPPJ+XgUXGNIMXz92ouA1zx70XERx/eouBMPrRdGi2Gt1ouUN+fl
        wfu9KLgI6lQuevWi4C9Og3+oPai4D14UYbI96LoB3PqKLozYc0XQgwaLoAw5PFF0ADOOTRdABYilcB4P
        lKH7tTuAtFxB8xHygL/tVm9wHKrDbubefWkBLKGT51P3qAIw7KME80DGsdzE1aeghKq4D1k2rjNFxjgS
        3NFxCt9ys3uAwgbV+Yj2pAPOM4XJb1oAT5Rw4y3egA34+6DigYbd3J7+tAg3FPlH3/4T6UABnMfIH3qA
        DGKABW2EkfxUDFjPld+aAHF2dmbZkHoT3oAjB2jhcOetAEqjYoDHmgQpcrxigYA569aAJI1YAsp4oERk
        k8t1oAk80xxjbzn0oGR4oEKwO3pQAwZAGT8vpQMilO2QlejUAMI28UCEU/NVp6AE3WquBGoOKLjIz/rD
        RcQp60XNFsFFyiNh8xouARnDUXAJPvmi4DaLgRGSSOU7eh9KLgS7ZPX9aLgIXdeM0XAUEnr1ouAHii4A
        W8vn+9RcA8zyeBzmi4C5TZyMmi4EW/HQcUXQCbkPUc0XAkUjbxwKLmi2GP8AeNFxib8cUXQDGJY5ougG
        H+L6UXAjSNWHBy/pRcB20H5ZECle4ouAEhl4JI9+tFwGqhC+Yx+VegouA5gqrhenWi4DVOFHai4Du+PW
        i4DkfacUXAe8vFFwFiOQDRcze5I42nd3ouIVZePSi4EsUuAaLoBRIw6/d9KLgL5ufujilcABzzTuAtFw
        EK7zg8baLgRtJ8x5JP8AdNFwBZGycrj2FFwGhy42kbR60XAYwAbAbd70XATeV4xRdAGc0XAM46n5fTNF
        wHGMMmR0oui1sQ429CMUXRQm7d8pouAZ2cZ6UXAekuDRcAmm6t/d4FFwIc/rzVIBDkck/LTAVAMll71D
        YDFl+f0PvRdASGYoQRyTRcCSRwGwB83rRcBMGT73VapbAIuS2cUwFZyCfQUAG4nvj60APVkCjd1oAaxB
        PynigB0cm0EUGb3GkljmgQ0u2cLwR1oAUHd049qAF37SAWIPoKlgWc55zmlcByylRilcB2Q3JYg+lO4D
        o5Np3BixTjBouBI2Sc4C55xRdAOWUxDjvWb3M3uAbY+aQh7OXGQN5PUHtQIgKA/xZ9zQMa+AMVaeha2I
        W+7VXKE42DLke1FwIu+Ac0XAa/SqRothiuQKYyRW+UE8UGb3Gnk8HigQ5W2DPWgBrOZDu9aBDlPHJFS2
        arYFbc5HZaVxkom3DNFzN7jiEZMsOaLiI2jUrxwPSi5otiHbt44ouhjkcqcEAD+9RcB7SHPdh6mi6ATO
        7mi4DZMEY5RvUd6LgQkEfeABouA9TxwRRdADuQB3AougGudzE0XASi4BRcBy8xOBzzRcBxPoR0ougDPu
        KLoze4DJ70XQhokw5HWqQEwAcZJ5pgBGOKlgPjcqcYpXAe28nIOAaLgJuLfKf4e9FwE8zfyeKLgSoRtH
        NFxDvMxx/Wi4x4yByeaLGQZ9xRYA3ke9LQBckjNGgEuD5YqHuIaAQOfu+lICWKbgqBhaBjHHTvQIkHSg
        CRD8ooAXNBDE8zaeeYx94etBIeYw6ig1WxPEdyA0AP3kdqCHuJnPNBIu/HFAxpkYsNnBHWgCSZluAFUH
        K0BYbu8n/WcntQIjZmckk8mgYH7ooERL1agBF6UAMd8MaDVbCbh1bnPSgZDMzqSG5WrVrCI1O5QRwp6U
        9Bi8jvTsBG0LzE7DjbyaLBYTI9aDRbDJCPWgZB1NAEi8KKAGsMEsKAGhgeX6HpQBIikKCeTQBKjoVG4c
        0ASgjaMHAosZvcCWTlWHzUWFYXaV4JyaWgBg0aAHPqKNADn1o0AY8Xzb/WjQBtPQLC0Gi2CgY0f6ygBZ
        CWIWgBSu04HNACE468UAIPv0GbJRnFFhWF+bsaLILApKEnqWpaBYTbtjce9PQQpYscf3RRoMeh85cnjH
        rRoAu7IzS0ASoe4g+fscD60gFDleDyaBhkk5J+X0zQA5MHOBxVq1hDcYqtAEX71GgE3H94j2FGgCfwvj
        JrN7gDyY2gc0hjjuaVNvBxQA0BgPmOWoELh+xwKADp9/n0oAEBYsGOMdKBiBuMuOD0oAUA9SDn+8elAg
        J55IP04oAPKH388mgCRVeTZlvkUHHNAEKl2ckHAzQMew3nDHpQIN5XazdPSgY8yrJKWB4NAA8pjR8c7j
        QA6Ufu1oEOUNtG3KnvnigBrK2S6fd9KAG+aw69aBkch3EGgQp60AMePcM0AQbSDgVatYYEEdaegAclBt
        PPf3o0ERtgrwOKegCCJmjBBx7UaGi2BVKrg0aDuKCMNz2oGQigBcUAJQAFtncHPYDmgA2hOMEexNAEb/
        AHjQA9CNoA+9QArAgDPWgBj8se9ADcH0oAkUmMDjlqAHbccdaAI2B3HigB8ceVJORQWtiMjBwOaChKAG
        MCTxQALwWzQBEVdj8nWiwERSUSEE80WAeoO7nqfkoAdJgEbgSBxQAkm042DC0ARzHkUASDpgH94fun0o
        sBIhyBg0WAXn1oADuj5PIbp7UGb3EDeU+2T5j2xQIlyT1OTQA4HG3mgCVjmVcc8dqACOTaaNAJC245oA
        aX2HI60AKH8z5u9ADG6mgBvmY4zQBGzZYmgBMjt971oAFBDc9aAsK7bGJHegCNgik71LemBQA5T5YBBJ
        J/hosaLYSWMeW+QF9hQMhOBxmgAoAKAHqm4e9FgGtsVsEc1SARkVlyOBTAap8scdalgNaRZCSVO/ucUg
        CMjPUUATiQgYCgj1osgF3knZjAbmqQBl25zx0pgB+Ujd90feB70ARS5yM9aAAtk7e1AD0G04oAdJ1FBm
        9xTnr2oEN6Mc0AOaQA4AO71oAcuQu4n5qlgL5uaVgHxncc0APZyDigBY5eaAHtLzQAglJ6fpWbM3uSI5
        B6EUhE6NncTQFiJkBOc0BYjbGcL971rRbGi2E8vJ+Y/NTGQzRDJoArlinyj7/wDCfSgLClgyAiqRothF
        B2imMjkyGyx+Wgze45ZABhelAhXywUr170AI5BY4oAjA3uR021LNFsTJJuyCaQxybVUAfe9aDN7jg5HB
        5P1osIcTuSg0WxE/C88UDGF9yqP7tADjOzHJ+6e1FgGiYbvl6UWAmB3DNAEMvegBkUqqCNgLetADUmLv
        5Z4Dc0ASE5P6UAMftQA40AOE4iAC/eP3qLAI2CcqMCgBUKBuRzQZsc7BCSvQ0CI3ABwPvetUgFQ88nJp
        gT1LAMP2OBSAkRWZfnIIFACtIAmV/i7UARExqcHk0ASRMmCT90/dFAAMgYJ5oAmB3Y96LgBjDc0XAkUE
        KBms3uZskUZATP3utIQfOehwPrQIOe5yaABQwfJ+7QBMs0akjGKAEGSM4wvYUALx1HAoAKAHR4By3I7U
        ASMGzljke1ADTJg4A4oGOSYk4xgUAPd9rEUAAJIzQAvNACGVo/unBoAYXaQ7n+8etAhKACgCN/vGgB0f
        ANAEDvhiKBg33N2etAELuV2sTlT2oAc8ioMHlf4cUCGqSRkkZrRbGi2GeaYmbHOadyiI9TRcCNpCpI2Z
        HrRcB0LZLEjb7UXAazbnK0XAbgLxnii4Bii4D1cqMUXAljTedx70XAcx+YpRcBAu1yKLgSDhqze5m9yR
        +lIkjUrjBHNAxykZbHHtQIQA4oNFsNb7xoKErRPQBKdwDAHzZFFwANuGaLgJ5m1yKLgNcea5z2ouBLGx
        KDJxRdAPwaLoBPxFZvcBefWkAc+tBmxADuNBI9+lAEa5xk8rQMXeAfl6UAHmqOqkmgCWJgQSOBQIRSgb
        kc0AOdih3KcL2oGN3F/mbqaBC0APQjaAPvUAOLGPqclqAAgLwOGoAQsY+pyTQMXAX6UCDI9aADNAAB5n
        H92gBGcyBR2oGKzbDgUAG5CMsOfpQIMjqOBQAp5QUAQnrQA6MgH5uR2oAkJUN8xLP6UANCBnzgL7UASj
        C8ZoAT55XEan5TzQBO0hdQWPzdKBkJcqcYoAUNu570ARt940CE7470AKT8tAERXb81AAZFdAGH40AQnC
        ZZf4OgoGKFPb60AMbhjmgQ3Jb5e1AxcIvBGT9KtPQtbDX5AIHFVcoUtk7e1FwI2G1iKLgJRcBGIwOaLg
        NfljRcBOccgAf3qLgOTbjh959DRc0Ww7OewB9BRcYqShS27kdqLmb3EjY/M5PzL2ouIenyrg9etFwGsH
        LHaePrRcBvmsDtY5AouAuFX94pJK9FouA05k3ZAXHOKLmi2K+WPOcfjSuhjGhdjnNFwHK0sKgdAf4h1p
        3Aay7TuLbvc0XQCeaT249R1ouAxg7HIYkepouA3ey8HrRdAMc7iKLgSDhkzxx3ouAxZMMRRcCZpMhdo+
        b1ougHeYx68n1FK4CYP36dwJoWyATxRcCRim45HNFwJPNQRhUG1h1rN7mb3EU7gCBSESqUCjcOaAF3xj
        58crxQBG5EbZXo1aJ6AJjb1Py07gRvjcSOlFzRbAM44UEetFxiH3GPai4BvxxRdAMYlm9z2ougHiTbGB
        RcCPdnnIougI2B3ZJBWi4CPg42jii4AW3Hb2ouAu3bxRcBvmBXIAw3rRcBQS0hJ5NFwB+Uei4B0fnjp/
        Ki4CT5K/KcHvRcCsMEcdKLgWIv8AVii4D95HHalcB6BiokB/d/xCncBhJJJk+Y9vai4DAcPyRRcB5OTR
        cBjPhgKLgT5Lc5ouAbjny/71FwDcpOXB2jhh6+lFwI3cqxA6dqVwHKcqDkCncB3PrRdAPilMTN70XM3u
        TDHljFFxEQ+/RcCyjIFGRzRcA3qrZQYNFwJQ7OMseaLoBsiuw2g8NzWb3EN5EY3daQDY+tWnoMcwCndm
        quBDKd+T1ouaLYrnNFxhz6ii6AR3I2jrRdANfEjnfyD0ouA0xeT1IzRdAAlB/iP4UrgKDnnOadwDKdxk
        0XAilfBG0cUXAejA5zRcCMs4PHSlcB0byetFwJCTMSrdqd0AUXAGOF3d14ouAi8Ci4CCZkcjqtFwJhNH
        J1FK4Ctbqy5BAH1p3ArPH5bHHNF0A5GyoJouAuR60XAkt3jV38zv0ouAwsmTx83rSuA9Qdop3QDW60XA
        bwDk/c/iHrSuA9F3rg07gNaLy2JHP0ouA9C7OhBx1ouZvcAxXg9c0riJFOVBNO4DGfB4pXANm/n1ouWt
        iSNdgJp3RQLK2PuZ96Lmb3LCy7V3d04oESoflHI55oAdzWb3M2NH3qQrEx468UBYRSN3WgLDnDljg8fW
        gLDVXc58znHSgLCmZmYqecd6ADzD93HHrQBIowozQBIhBUc0BYXzdpxkUAKG3c5oATzAvDcjtQFgbLBS
        eTQArOV+goDUTzaAD/W9e1AC5J68fWgBASWI7etADiACQOfpQFiJ/vGgLEcj4GKAGKdwzQFhrZzwaAI5
        Oh9aAsNH+rFAAP8AVitFsWthF4UZ4plDW5JxzRoBG/K0aARjpRoFh3l7/unB70aAG0PwOAtGgCeYfSlo
        A+PLHOKYE46UAIOHoAOvmY56UASuRheaze5mxT9aQgK7fm70ARsxZskAe/egByfdGGyPU0Gi2GsrA7ga
        BibiRljzVrYBkrbBx3qtAGKAoxmgAYs4CqcUASjagCtzIOpoAXPvQAgG9yP7tACtKSelACKcvk8Vm9wH
        M5B4FIB6ElQelBmxjM27CZBHU+tAhynIyeF9KAHcHlelACD7xoAc2c8UAN3EcUAMaQ5PFADwR5YLjOel
        AWEDFRg0ATRMCCc0AAwRx96gBGfaFH8Q70AKSSfm60CDrQAZydtAwK7eKBBQAYz1JT0I70DJFJxlgAPQ
        UBYXKnp0oCwc9z8vagLEbgFtgGA3NAE0LfIST7UAROPmNAWG8dBw1AD0yFGetADqBEbD5jQBPbEx4PrQ
        Mluk2kEc/SgQwEsM0ARufLbP96gYFcLigLDkZPKCgfvj90+lAELnYxI79aAEICqMHJ/u0BYjYPKu3hQO
        1ADVAVRuBJ9aAsGFPRiB6UBYY0YJznPvQFhyjauMigBrHnrVrY0Wwm8qcAkn+72qhkcpJIJG0+lACAZc
        0AKybmo0APkXgjmgCNnwx2jiiwDSc8nigBQTjhQR60tDRbD1ZNo3/IfbvT0GNfliQMD0FGhmxUG07u9G
        giQAOSxOM0aANA2jFGgCpGJS3I4o0AaDRoAxuWo0NFsRsiE5IOaNBhtwPl4WjQBN5BxRoAxzuGaNAGKp
        Cgrwe9LQBrTF22gHH0pgIxAXrigBFyV+7gf3hRYBjDzGK5JC9zRZAJt2/NRoBIJSYxt4PeloA+NmCApw
        G7UaAO27eC5z7UaASKoVQzfMD0o0AFkbdzkmnoBJuzyaze5m9x8cu04pCJGO45oAQkDrxQAVatYAz/sg
        +9VoAxs7jn7voKNDRbCb9vAGBS0GISTzT0AM5o0AaActj75+6fSloAwcDJ+7T0Aa5jx0paANXG3jpT0A
        CSnI/io0AXG3ijQAzQBEx+Y5Py0AOTDHglB2x3o0AcXKyEFdvtRoAOBK43f6v+IetGgCXUBgIYnIPb2o
        0AgYAH5fu0ATREbByKAGvI0TZ6qfSiwD1kcgLEdq9896LAJIDj5eD3PrRYBimPaPl/SgCRCpXjpQAyVu
        d4OStADkOxsglj120WAm89mGSoQeoosAKctkEt7miwCSD5zQBG/agCVSCBt+960WAUbu55oM3uNEhjfj
        nPpQIs7SqKxPB7UAPLBvmHANADfMx0P60BYlRsqDmgBfMIOBWb3ATd53yk42+tIBRWi2AMqPvDIpgRzs
        FClOh7UaGi2GPF8vWjQZVYbSR6UaANJI+fuvFGgCMMMvvzQA665Mf0oAjiIEYycdev1oAkzQAZoATI9a
        AIJf9YaLAKkjqANoZaAJlYFQcbfagA3D1FAC5oAKAI+dzbAGP8We30oAdGVCjB496AHDnpzQAUAGaAI2
        O5iO1AEJbZKV9KNABjk5o0AerkKBRoBLGzuyAHjmjQBQNnykjIo0AXPGe1GgDQ+HwOhoAcx8o7QcgelG
        gCFgw4+960Gb3HpkHk80CHN97JOV9KAE8wZwvSiwC+YaLGi2DJPNFhiF8cbiPoKDNliMEdetZvcHuSnl
        lpCJ0UPI2X20ABiEPLfMP4aAJImWUFZByO5oAi4Mhx0oAlxQISgYKSzbV49aDN7iurBvlOFoJHoWIAc5
        Ws2aLYUBQxxwKQxzIGOeOaBibccYoEFAEsDLu2v8q+ooAfOIyxjjYsjc5NAEaMhXkZPSgZIxUxqFGDQI
        bgySqrH7vegCFmKsQfu+lAAsvLYXavrQBESGPB3e9ACkfJQA0A4+U4PetFsMY74Y7elMCPOWY0AIAfLo
        AaG2LnvQA1mLncehoAGl8tRtHBoNFsNXpQMY5+Y0AJQAqHrQAgoAesvlKMc5oM3uLvxQIkUkqCT8vpQA
        773+r4HegByNHnpQBIyiRjjgDpQBEwdjkHigA+UfeGW7mgBcjDY4GKAGJwtADJeooNFsBZM8jJoGRvjc
        cDArRPQze45fuincQ1mIYgAn6VmwFQ5PPH1pAPbk0APT7ooAH7UASr0AyPpQAvPqKAI2Vix+cj6UAIoI
        LZOT6mgBAxUYxQBIpJUHpQA4ZPegABJ6EUAHJ70AHPrQBGwO7nlaAHrgjjgelAh69OaBjkG8tz0oM2IG
        yMmgQvmAcD73rQAgJL5brQIcz4YigYjHIU0CHLyzYoNFsNVW6kErQUISueOB6GgCUOrRhR95e9AEe4vy
        3Ws3uA4Oo2owyrc0hEjursSvC9s1othkT/eNMBR/DQZskcjd1oJEoATfjpQMf5vyrWb3AeZSTSERswJJ
        bkdqDRbCJwTk/jQUIOQKBCOMg0DG/wDLMVotgGqDjn7vpTAcXDLtHAoAiMLdmwKAEwV4LCgBrFc8jJ9c
        UANIDnA4C9BQAZduQcD60ANcEj1PtQBGHIGKAAOHbb0b1NADjkHaTnHegBCAvFaJ6Gi2GMVBJYZWncY0
        lf4Rhaze4AGTuMmkBIpAHHA9KAGsCSTg49aAFLZRVPAoAl8oAHmgCOJdoIoAmto0kMm4chDQBWbGeOBi
        gBKAFLZXbQBEQUy39zigBjDaf1oASgBFkKzr7CtE9AIZXQyEsMr/ABD1p3AFdwBtPHalcBku5yqg4Lct
        RcAYhjx06VD3ASkA9JNpxQBKrgvnIoAeQxOVPB96AELsnDA/WgB6NuUHIoAcV2/N3oAekuVFADgQeW5z
        0FAAchOTzQA0dKAJI3ROSOaAEkcSOWHQ0AIc7Ofu+lAEa43HAwD0oATD7B83y9hmgBqlQPm5HagBrSBT
        hgSfWgA3BuRwKADNAEc/QUANEq/cIJx7VaegDGwWO3pVXAdHOIwdv3vWs3uBJHKZFBYjcaQDipX5ieD0
        9qAIyDIxDn5u9AEc+YgFPKirT0ATeoAKDBaquAZMfB5ougHGXCrnii6AkbfONucAUXATBEYz1ouBEQD1
        Oz0I70XAQff5AX2FFwJBL5bnHei4C4bzCQeKLgTxyFTgnJougHltxJyKLoBmzLMSRtNFwGhwnC9KVwEL
        BvvNs9CO9FwJFkwOcL7CncBfM96VwJEYuMH7tFwF/drwB+lO4AQx5XhaLgOjkKHBPNZvcze48qHk3HvS
        ES8KMZoAF6tQBGetBotiOQdKBiGMOdvZuTQBBJjefbigBmN/4VonoA2SX7ntmndAVQPNIz2NK4Ejy/NT
        ugE8w+lF0Amc80XAKLgL5hHGMD+9RcADb+Mkj1NF0A9QEXDcjtRcBcjp/FRcBSWj68lqLgDJuTH93mi6
        Ai37+DxRdASRoyggHAougHxn5Bk5NFwEJAduaLgOj+6KLgNcKxOCA31rN7gRMpDEdT7UgE3FeMGgCxEd
        0YNACbYy7ZHNAAi7VH9z0oAR/mY+Xx61aegD1xtGBgVVwFYjbRcBqfdouAuR7UXAkGcAEBR/e70rgGfR
        s+5p3QC5PqKLoA59RRdATxtk7egrN7mbJVAV8ZpCHsSxIwcL0oAaJJJvl6BfWgCVNxUZPNAABtYtQA5w
        5XeD1oAapZhknmgB8f3vegze4T8sDQKw6OQjPFZvc0Ww1HLNg8Uhk4ULw3zDtQAnmFeCaAFB3c0AFABl
        MfN8vuO9AAZMHgbfYUAHztyDxQAm8jg8mgBd2eaAI2zuJPK0ADFSny8GgBhkZVUHk0AI5LNmtFsA0uVp
        gNJ3HNADSH7HA+tADJM45OTQAxelADmG9ME420Gi2IS2eaBjDkng0AKCABkjNACMcHqB9aAFQknaaAHs
        NrEUGbHp90UCFzQA7zvlVPSgB3/LSgBwO5mXcRQA5F2qADmgB3PrQBFKDkUABjyc0ARtgMRmg0WwJbtJ
        lwcDtQMiJLRyE8nPNWtjNgRnpVaCHxt5ak9M1mwBZUcbmHJpALkHp0oAC+OKAJE5UGgAHDF+60AOIwf1
        oAaWcHCnigCRCxUZPNADufUUAMbrQA3BP3eD3oAQnZyvRqAJFG1QMigBG60AMD4fFAEitlsmgB5yTwaA
        FU8UGbEm+6tAhU+6KAFzQAtAWEoABgtydg7Ed6C1sTJM0RJI49BQURl45fnYYJ9aAEIA6dKAEBz05rN7
        gKwOFGOaQCzfdAq1sAlUAYoM2HegVgwRy33aAJFIwMcCgLAv3s1m9wHMCT8vB70hDwVMY28EdaDRbDTE
        si4UYVuaCgjdYkG7kL83HtQAnmLIzOOA3OKAIT1q1sApACbs1QEWS3NACZLHaaAGNCAx5oAeqkKADQAw
        7fMORk/SgAZFY5HAoAYMB8FtnpjvQAS53nIx7UAQP940APTG2gBsnUVatY0WwkgyQnZuTVaDFZk28jkc
        Vm9wGKVz8owfWkA9oyTlutADwqhABISf7vagCNxjG9T7CgCQAgc9aAHJ96gCQS7WZv7vAoAr5+dyAHz1
        B7UARgYHBz7mgA6sPrQAku4yEg/ux94etAEThsYbk0ANXpQA08O1WrWAgbg1WgBvK8YNLQBN27n1o0AO
        +O9Q9wCkAUAAKBuRzQBZV1RdxGR2HpQAod5Pv9KAE2Kj5XpQBMGLjOaAEH3jQBMv30oAQDr9aACgAAyc
        Dk0AFABmgBr8jA++fun0oAgzuJUD5/4T/OgBdoXgUADSELigBsbZyelACIfmoACPMd/agBgLMMjg981a
        tYCOVFcg52DtjvT0AUqdxG3GOwqGA1cFuPvetICyhwoBIzQA15UU4x83rQBDIxkIGMj2q1awAy7Tiq0A
        AcfeGR2o0AApk4PJFGgAshy1GgCLMrDa27P0paAAwH46e9PQBzcsaNAEyY+f71GgBt2nFLQCSLoaNAJo
        FQqCMBu5PejQBzhd5CDinoA3Kdxk/SjQCNmjLHj9KNAHxNEAdwyD0o0AF6UaAPWRojwDzRoA5nIPFLQA
        yTzmjQBAfmNQ9zN7kyY+YsMjtSEOgwVIkIOPu0AKvmMM5/WgBeR1PNBotg3Z47UDIZ/3fTkH0oAgZdqY
        oAiaXauMgVatYCMncmarQBoBxRoAu3fx6UaACtmRDRoAp+5+dGgDB0oAXtntRoAUaALvK8YpaAGSwyRg
        f3qegCbXP3WJHvRoBIm4KNxyKNAHtGvkuxGQego0AhPXltzf3aNAEIfrwo9M0tAHRhgW48w989qdgCIg
        /KWKgdD60WAmaJM/Moz7Vm9wIXUwtuQgBu1IBvmt90/nQBLEGwcGgAUYGc5NAApkd+MgUASKpR8GrVrA
        OYjdjPNVoBEfvk9vWloAMdhyOd1PQB6qMYfkD7tGgDgS3Xk0aAGUH3hz9KNADIPTpRoAYpaAWG6LWYFg
        NHsXj5vWgBZHcAYPAoANx8zLHmgCUOR0rN7mbJRH+7Ejf6r+IUhC/wDLIenagBFUSKAB83rQAySM25zn
        JNADkbcNtAhclOMUDDOT70ASKGxxwO9ADGKljt4FADlk2jFAC793BNADHVwxCnA+tABGDznk0AOQcfM5
        A9KAHKFUsynj3oAiLbuTQAmR60AIFyzL2bmgBvOzkYxxQBEXI4xWi2APmPJ+76UwAyYOFHFADGJZs9zQ
        A2g0WwDnpzQMbIRjrQBCeVoAaucUAOMayrjOGFACRBG3CUZI6UAOQ5UGgB1AEiHgUAMf7xoAdGyA/MOa
        AJwR26UGb3JFPyjmgQxj8xbqV4oAeqkKPzoAY8hViKAANlWJ64oAhEe7mg0WwM7hdg6CgYkMQncxO23P
        OR3oATD73xhQOMA0ARngLzub0NADmPPIC+woAeh+UUALQA9ZCoxQZvcdu3c96BCnigBADv6UAK3WgAoA
        MUAIZkXgjmgADBhkdKAEH36AHHrQA0A76AHMpB3H7tADlbcMjj2oAUfeNZvcBWzuJPK0gE34+6DitFsA
        vJ5pgPH+qf60AI4JbigBuDnFZvcBN7jhTxSAXDSfe6igBN23kEkntQBYhhRoXJOx87cCgBHEm3ORgcbu
        /HFADFyVySW9zQAux1G/cNp6DNAB5h9KAEHDlu5oEOaTzB9KAGq28ZPWgZJhii4PFAEqEk7TQISSFi5w
        eKBiqGiAzyD2oAawAY7RgUARP940ARtnNAAfuigBq5xWi2AXn1pgHPqKADn1oAOfUUAMbrn9aAImOSeA
        B/eFBa2G8Do273NBRG3LGgBI+JGzxQAx3IY0AOjyTnFABICXOKAADgIeN3JoAUHPIJY9MdqAHrJtbbja
        /pQBI7Ejk5NADF6UASoyBRkc0ANcgscdKAIX+8aAEoAN5UYxgH+IUANaPyzhTuHrQAwfeoASYg5x971o
        Ag3lOJOfSgA+788nJPSgCMlmYluR6UAIAsvCjBWgA3buv3+5oATJj6nk9aADGOBzQArdFoAnRhtHIoAa
        wcsSGG3tzQAZG5eaAFifBxQBYBLDNAD1lRRhhk0AL5oPQcUAGd3NABsJGUcrIeh9qADcrcrnHv60AMbO
        aADBoAieQqxFAAG3DNABQWnoRvEzMSOlA7jY1KuwPWgLkq8CgdxjY3HnJ/unpQFyJxg7iApPYUCuIsxX
        J5TPcDrQO4qZ+bI2+1AXJITE0EysP3v8BoC5AkmGy2W/2ccUCuW0YOoKrtB7UDuRTd6AuRKCBz930oFc
        PMxxH8uOuaAuG4NyOlA7igPvTB4oFcTBGc9c0DuLtwNwoC4f63rxj1oC4hbLRv1K8UBcEYrIwRjnqQel
        Bm9yUETDkBMdqBD1m8pQ3dqAHlyEDDnd6UARKNpIzQA1chufu+lACuGZwU+72oAmYSAAE/rQAxZCox1N
        ADwd31oAF6tQA6GTgxdA3U0ASRsm0ZHNADiGPK8LQAcjqeaAJEjLKCTlfSgBJNoGF6UAVpORQBVZF3E7
        d5PXPagBF2qWAOR70AJwU++R7CgBBwO5+tADGXaS3rQWthMu/IoKuPUqBhhlu9AXGtIFbOP3f8Q9aBXH
        KTgZ4J6UDuLketAXAMfuDo3NBmxd2/G4mPsPegRIobH3MnuD2oAQFI3yXZg1AEjpGR+7/WgCAoQfLPO7
        k0ASefsjAH3jxVJ2LWxEpO7k5NPmQ9CyhGAKl6kPcZIqeYCw5pCEnwCQOlAEKAlvl4Pc0AOMgEh2jigC
        wjZUZ4NAA/QUANcqCXIyV4oASThF/u9cUAPjIKjb0oAaw8xj6LQA+JgwPGGoAaoZWy54oAkODyPu0AN+
        bs3H1oAs+ai8EZNAEisGUEcCgCaIZ+T+9zQA2OLzmP8As0AOZ33eWPlVu9ZvczYGUbAWclBw/vSEOjkY
        IMkle1ADvNY/d4XtQIUFiMk80DE80A4H3vWgCRJDtGeTQA7tuIAB/i70AJ5uehLe5oARTl80AOf7xoAE
        wCd3IPSgBoBA560AIJMOR6UAPYc7/WgBN27mgCNm3MV9KADaV4BoARXcFgDxQIYxkZc5oAWLdsGTWi2G
        NeUqxFMADbuaAI2kxMooAiJySfeg0Ww6MEn5OCPvUDElaPeeKAImyWO3haABsbMfx+tAEWCPvcmgB652
        igBdoPViPpQA8fcXBz70APZdvzUAN3buaAHAKu1mGQaAJxJE75A4oM3uOJBPHSgQ3btYtQArTc0AKfub
        /WgBqOjKCRzQA1yCxx0oNFsRM25itAxpXAzHw6dTQAxgQf1oAcvSgBrZzQA5elAEqK5UYPFAAAQ5z1oM
        3uTYRRuI5NAgDK3JHB6UAIZCnB60AMZtzZoEPT7ooGL5hU88r6UARs8bHOKAJAQYxjpQAifdFACmQrxQ
        A9CWUGgB3PrQBEf9aaAJU71m9wEGcUgF5rRbAHNMA5oAFk2lhmgBI2yGk/u8Vm9wJYYiVJYAIec96QEb
        uEGFJKjoTQAiksuaAGtJtYCgCZ1M20LwaBD5raW3RXZsg0DIWfy2IA3+oPagBqy/NwSfc0AOaZM8jJoA
        TzQenAoAepyoNAE0XQ0AAiZhkHigA3GP5T1FAB5tAAqvK5AOBQA5kMZ2nkigCvJneaAFXpQBDNJtyK0W
        wBESyA0wCTpQARZ2CgAk6UAMGBGDkk/3aAGfUbfYUGi2BtioGI5oGRZMhynGaAI2DhiGOW70AOXpQAu1
        z0PFADGaRSRmgBAjONzcg0AOI+VQnFAEjFQcOMydzQA2gB6zIigHrQA7cG5HSgAoAjf7xoASgBRHu5oA
        MbehJPoaAGT5wuRt9hQBE8e5c0ARMNq4oAT/AJZigCI89Ts9CO9AARIeRhR6CgA+bGGAH+1QAmYx1yx9
        TQA5CDnHSgAP+roAaGQDkc0AOTB3Y6UANFAD45MHFAE3m0AKDuGaAJFztFAEijKjJ2ehHegBfMI4xj2B
        oAGO4KaAGyZ3GgBhnMZ2+tACSQ4FAFctsOKAE8yg0S0DzKB2IzMDIQPvUBYVpGzz1oAUnKZoCwnCxjdy
        O1AWEiEmDzQAByowetABnPNAWDzjnZ6UBYVndVAB4oAZ5xKqp7UASMu35qAsQ70aQkjmgLEvmxjjbQAm
        4NyOBQFhx+5QFhofAxQAu/fxQFhQu2RBQFhvr9aDNhQIKALEZMcYY/dbtQA4RAv8vAoAiuQFYgfe9aAG
        RMUAJ5NAD5JTJh/7vFADmUIcD73WgBgcq5B60ATA7hmgBcZIT+/zQA0S4c+3FAEwJYZoAOaAHrJgYJ2Y
        6Ed6AHAGXqMe1ADJE8v5fSgCJo9yZoAryRcUARqmxc0AOLbo80ARt92g0S0GrnaKBi80AIy+ZgH+GgLE
        qOm9DIM8cUARkqCcjmgByhioKnC9qDN7gflYeZznpQIsOsmBk5XtQA2OVF3AjmgBisGLEdKAGigC/p2m
        x3rBpJjEFBIAGc1k3qWloU7lFjkJU/LnA4xU3ZVhrTE9QAP7wrVbGb3GtLwuDuHqaoQ/bv59aAEI2nFA
        ByR0wP71ACcdiW9zQBIkvGz0oAmThRQBBL/rDQAxZfKJ96ALEP8AqxQA+gCKXqMHJ/u0AK5dhtwFHoKA
        GhSigHrQB//Z
</value>
  </data>
  <data name="数据采集器维护ToolStripMenuItem.BackgroundImage" type="System.Drawing.Bitmap, System.Drawing" mimetype="application/x-microsoft.net.object.bytearray.base64">
    <value>
        /9j/4AAQSkZJRgABAQEASABIAAD/4QAwRXhpZgAATU0AKgAAAAgAAQExAAIAAAAOAAAAGgAAAAB3d3cu
        bWVpdHUuY29tAP/bAEMAAwICAwICAwMDAwQDAwQFCAUFBAQFCgcHBggMCgwMCwoLCw0OEhANDhEOCwsQ
        FhARExQVFRUMDxcYFhQYEhQVFP/bAEMBAwQEBQQFCQUFCRQNCw0UFBQUFBQUFBQUFBQUFBQUFBQUFBQU
        FBQUFBQUFBQUFBQUFBQUFBQUFBQUFBQUFBQUFP/AABEIAH8GpAMBEQACEQEDEQH/xAAfAAABBQEBAQEB
        AQAAAAAAAAAAAQIDBAUGBwgJCgv/xAC1EAACAQMDAgQDBQUEBAAAAX0BAgMABBEFEiExQQYTUWEHInEU
        MoGRoQgjQrHBFVLR8CQzYnKCCQoWFxgZGiUmJygpKjQ1Njc4OTpDREVGR0hJSlNUVVZXWFlaY2RlZmdo
        aWpzdHV2d3h5eoOEhYaHiImKkpOUlZaXmJmaoqOkpaanqKmqsrO0tba3uLm6wsPExcbHyMnK0tPU1dbX
        2Nna4eLj5OXm5+jp6vHy8/T19vf4+fr/xAAfAQADAQEBAQEBAQEBAAAAAAAAAQIDBAUGBwgJCgv/xAC1
        EQACAQIEBAMEBwUEBAABAncAAQIDEQQFITEGEkFRB2FxEyIygQgUQpGhscEJIzNS8BVictEKFiQ04SXx
        FxgZGiYnKCkqNTY3ODk6Q0RFRkdISUpTVFVWV1hZWmNkZWZnaGlqc3R1dnd4eXqCg4SFhoeIiYqSk5SV
        lpeYmZqio6Slpqeoqaqys7S1tre4ubrCw8TFxsfIycrS09TV1tfY2dri4+Tl5ufo6ery8/T19vf4+fr/
        2gAMAwEAAhEDEQA/AOCr+kD+W3uOjJQ8c564oETgBeM0APTrQBIchgSflqWA9pAJTjgUrgDHcc0XAkiY
        gFOgbnNFwHwuGUnPtRcze4wyFTyfl9KLkkisCoPQH1rN7gOyKQCFQo3MMg9KAAeYwzmgAUHec8n2oAk3
        kUAAOWzQBLQAUARs5DEUAJv28/3qAGP+6bjvQAnC8Zq09DRbEEv+sNVcoQ/couA0dKLgIe9UgIBTAjZf
        mJHJ9qDRbETHLZoGRsMk4B3etACYYdTzQBGzKhyRknuKDRbBtb+A/LQMTcSdpPNABjZxQAinMmKDN7ku
        SflPGKBC4VeMZNAB9OB6UAIWI4oGPjOTmgQ9iC3H3vWgBvI6nmgBjHYcjvQA4qVVcnK+lABJyxK8CgBn
        PUnK0APQMT8pwvYUASSMyDawOaAFjyUBxQZvcawO48UCHLjaMnZ6Y70ANdZCxwAo9BQA5RJtHP60AO57
        8mgBDL5XTnNAC5duAeKADaV4PNBotgoGSKH28HA+tBm9yMuyyEHn3oEKxy1AD4+AaAEGB3yf7poAXzCP
        4QPpQBIpZlBzigBrA55oAcudoxQArx7gp60AKxKHFQ2AgJPNF0AcD74yO1FwBDgsCeaLgCHJZTRcB0Q2
        8UXAex+ai4EbsYjk/dai4DiFULtP/ATRcB2fn5AX2FFwFY/MaLgJzRcAAPflfSi4CZHbgUXAUR55ouAY
        VfvDIouAb1Y7V4Wi4DJQ0fCnr2ouBCYSOvWqQBjbxTAjf71ACFypxzxQBGzoTluTQA3I7cCgBjZ3ZPK0
        Gi2ADP3RxQMORQaLYY33jQMYOJlPagB3c/WgBMj1oAPvfICN78qfSgBA8Zc8cjg0Gb3HtjPAwO1AhPlH
        BHP0oAD7IMe9ACfUY9qAEMm04oAazbjkDBoNFsOXcANxyKBjmIK8dKBkNAgoAGxhcfeoGMkzuOetBa2G
        0FBucdDgUAAkPfk0ASIdy5oM3uOxj5qCR0au53ADB9aAJwGUYOM+1AEbybWyf9WPvD1oAXzTtXJzQMmU
        7m29n5oMnuHmYkNAhWbc2aACgB4d1UYOBQA4Enk9aAFyoHKA+5oAaknzts+X1oASRg4yOlAEROQq0AOI
        2nGc0AAbd8vagBzRAKP5UAMXCjFADGDFjg8UAIXK8HrQMepdhw34ZoEOG4/KfzoAVhtTFAEbh9vBwKAG
        KxAweTQMRpRuGWI9qBFgyZQYyw9aAEViyhSu0evegA2heAdw9TQAxs5NACFdvzUAAYsM0APWQIMPyO1A
        BuJPJ5oAXG35u9AEbSnccDf7HtQA5X2qCDndQMXAXigRJGUB5HNADjgyHHSgB6vufb/doAXd50hzwRQA
        9iWAJOVqWzN7kwkAHyjildCFyG6D5vWi4Bgjr1ouAc9MAD170XARYRI+N2fc0XAdLJ9iG0c/Slc0WxSk
        fzHLetFxip+9G3ptq0A1wAxNMBvm0DI2bLE0ASbyLdhjNAhPPcgKZGRB0296AJVkkAHOE9KAFDhhnIoA
        B97pgf3hQBMsPmqcSnA9aAItsmzAbNAEbKXXDHlaAGJLzwMN60Gb3HGRs85JoEBbueM+tBothjABiR9+
        gZCxySZOc9KAD5h1PNACFiOKBhknvQIXn1oAOaADPuKADbv4NAEbIY2x1Wg0WwMAF3AfhQUJGS2TigQ+
        POwUAOjTLsaBkchdXIU8UCGrMxfa1AyUPt4oAXO7vQZvcQhh3xQSPjQucH+GgCVZCX2f3qAHlt5z+FAC
        Yc/dPFADy7KqgcMPvVDYEpkWQKqjBpXAWQPFt+br70XAlCbBnOTRcBM7uadzN7mYv3qsHuTJ+6dnHVqB
        CD75oAsJOm0Jj5h3oAdt38H+GpYDo8SHBOKQD2AjYrkcUAIHI7lh/doAUnPO3b7UWM3uOjKA/OM+lArD
        2w7EE/drN7gOhuFBOUB96QDvNJOcfJ6CgCRWDLkcD0NACqMZZTg96AEDbhkcD3oAXmgLCc55OR6UBYN+
        PuggUANeQ46GgLDVOVFAWDIoAYy+Yx9BWi2NFsRMdzZpjG0AGaAGv0qkBDTAjclT8o25+8woNFsRyKBj
        bll9aBiNjPLke1AEEx2cg7s0DGbdsYFBa2EU+Wuf71BQMAAAB81Ah2VH3hlu5oAQLhtwXC+o60Gb3JQS
        wyCW9zQITa4+ZTQAAlmy3WgBWfBoGAJIzQIMGgA5oAMGgAIIGe1ACbi3y0AGzPy5Hy0AODB9qj7x5zQB
        JPdtMFD8dt1ADQzjAViR2oM3uSxSHBzyaBAOm7oTQAu7dzQAUAFAEbcsaAHrwozxQAu7dx2oNFsSQeWk
        o3jPHFAxjfeP1oM3uNeXIVADkd6BChmWdQeeOtAEitkZPrQAx+tAD0+6KAFoAerZG2gBcbeARQAm/BxQ
        AuSec1LAXn1pAB+7QAioGAwPmoAXay8E5NABg0AJyMv3TigAA2HlfMz0B/hoAkSP5QSxb3oAOAcZoAXj
        oB81ABIzJGoIOfWgBY23ZNADc/u3HfNADXZw3ynigBVJI+brQA2XnHAA/vCgAK7fm7f3u9AETSOTlWyP
        U1SAASRlutMCNo2clgeB70AIXaRAQcN/FQBE/RdqZHrQA2TO48Y9qAEZSE3UGi2GiZljBTgtQMFDBRuI
        JoNVsNbk0ANyW+XFAC7dvFAEblAxyOfpQA3g9BxQAgxuOB83rQQyUOU4f5vTFBIu2T7+aADJPLdaADbv
        /CgYoZSMkEn6UADY28cCgtbENAwzQMliXeDnjFAFeTezkg4FACb2UYPPvQAhOefWg0WwZHrQMAd3y0AM
        c7GIHSgByT7FB9aDNkqtkbaBAJNrmPsKAJkk2ZHFADSSQpJ+WgBeN+RwKAJuce1Bm9wGT0OaBD1KbcEf
        P60AO24G6gQEgplxkHpQAsfCDJ5oAJGyNvagCNFKnnlKAHl+flBxQAmc80ARudhz60DHq2xQKAF3l/lH
        D/wn0oAYy4Jx0HWgQikoSe9AyJyZMNg0CJB90cAD+9QMN4HAkY/hQIN57ZPvQMYwYsSeV9KAHryvy8Cg
        BrFQfmGT64oECOwb5OF7UAPZ2J5yTQMTDnkUALhu9AEbLJuPPy+lACFypxigA8w+lADo2BPAw3rQBIwY
        HnrQITkZbqV7UDDaR/OgQYNADjIVVR6UALkM+SxFADml8s4HIP8AEOtADkGVwp3Ofut6UASoRtGKlmb3
        JFkwMZpWESrNhR/jRYBfN/zmiwA/Cq/rQA+Rw8Q4AP8AeoAqsMLyd3uaLGi2IelFhgkmCRVICInJyeKY
        BQAxuCecUAOEpWMN1K8UACy4AoGOLZSgQsRThCPvcmgB7Sjdx06UDHrKcCgQ5X2kt/eoGMcbV9qBEaZ3
        HJ+X0oM2OaUZ+U/LQIBKrcEbyPXt9KDRbEbyfxAfK38XegZGyEE4JYepoAa3IHegBxzmgBvmKvBUk0AL
        ndyOBQAc0AMdlQkkEmgByt5ihhwD2NAxeaC1sMfrzQMRZCpIoGNBDdWIPoKAJUPyjBz9aAGt1NACYoEN
        H+soAUkpITQQ9yQPvG5wSD0oESRyFAQetAgVgw4+9QAu9l4PJoAesm1Q3egBWfeoapYEueBkAD+93pWA
        UYHQ59zRYBC+3iiwEqTHaKDN7lVEDQrj73rVmgiAocE80ATAg96hsBTjoB81K4Eibtozgmi4Ei7FGSPm
        ouBHvR5CNpxTuZvcerhXIXoKLiHO27BouAM2w5Hei4CbdpxWb3AlQoFGRz9KQEiyYUbRxQA5SWLGgBFH
        GMc0APJ+VaAGySbW9qAE83jgYb1oAPNbvyaADzT6UAKDu5oAil9e1ACvJhcVonoBEDl0NO4DfX60XAYx
        56ii6ATJ9RRdAMkPbPT56LoCJuVz3PNUjRbEe91DAHApjIVLEcnmg0WwZPqKChkkpUFupT0oAYpyM+vN
        Ahc0AGaAJF+6OaCGGSnI53UEi4K8ZoAOaACT7i0AIOnWgCX/AJZCgCPk9DQAmH7GgBdrfdb7rUAGQ33e
        BQAZXuMmgA69OlACpEJC2e1ABEcfP/c4oAmXAbrQA9iM9ahsCFw5fIPFK4E3O9MnJxVoBP4KYCLjHH3q
        AF6ff5oAPl/hGB6VDYBmlcBF+9VoBzdaYDS5XigBc55PegB6ncAlQ2A4DHGc0rgFFwCi4BTuZvcDg8Af
        NRcQYI+91ouA9XIGKVwFBJ5zTugDPuKLoBBIVcii6AcxLHNF0A0yFUce9FwHctg+1F0ANIQuOtFwGIOd
        /rRcCbzsjj71FwFJbblm3Z/houARsOeAvtRcBjkFePvetFwGoG2jJyaLoBeaLoA59qLlrYCfl60rlEVF
        wBiNvWi4ESckr2bnNWtgIjkk0wDIY7SxFACyLiNQDketAEchMYyT8rdqAGgjG0DC0ANddo2ig0WwxZCq
        4oKF800AHztyDQIjbO45OTQAm7ZyOd1AwAxwOaBEqZCigBABv+8R7UAObuc5HrQANwtADVcqoFAxd2eS
        etADHKBjkc0CGBFZ8jgUGi2HurY+Vhj60FEGD360CHH7lAyE5GXPRegoAMf3elAB5pj6c59KAE3bvl7U
        AATaxFACl9shGKAHg7qAF60CLEJTyxkZNAxxAc8cAdKBCA55ySfQ0EPclVig6YLdhQIXBXigQ9ZCoxQM
        XOeckn+7QZPcMbzggLjtQIUshQZHNQ2aLYaMY46UXGLvIGE4PeqQDWkyeAcUxiEkqPWgQ1cgUDHLn5vS
        gQ1ZNvbKD7w9aBi5Y8n9aAGmYx7sc59KAI1H7oUCJIs7BQA1pCGIoGJ5jH7vBHWgRIrblBHH1oGMbIbJ
        Py0CDg9OlADS0gPy9KAF81h160DHqQyglyPYUCEkDkcfd/vd6AI0BDcksfU0APzhm5oAarCMZbkHpQMU
        SsevWgB6zfKOzetACMJCc5oEJtkzjPNAD1wFG8ZNBDDPocCgkI/vtQBIkvlg470DJEICiobEAkw+O1K4
        E4ZCMkc0XAkUjHGAKLgSJtYYcg+gouAFfL+UkGi4DGQE5ouAx0QDnrRcBv2ePygy4DGi4FeUEEA8mi4A
        IWkZucAetWtgImK7cMMt3pgJkeWMcCg0Ww0sCqqy4H96gY8qAcIdw7UGb3GlX7UCH7yqqD1FADxN8zUA
        OQnaCxwD2oAcWycfwfwj0oAZhVZhIcMO696hsBCQU4G32pXAiOB98ZHarQD0B2jPJpgOJLKFXjHWgCIr
        t6cL70ARvIQx70DHIxZQc0CHc+tABz60AGT6ig0WwZPqKCiN5CrEUANYlsEnK+lADjjPHAoLWw3ekb5I
        5PWgoUgCT5elAgflX/CgYebjgUGb3DcG6feoEIpO/k5NAhzOQfagY5WXaNw5oM3uL8p+6MGgkfHkH5ut
        AD2G9jz0oAkhZCCrfx9ahvUBmQzDHSlcCRv9aaLgDdaLgOWQqMUXAqxvhQMVoA7OeaAJE5X7oA/vDrUs
        B8blTjduSlYBxJaQlThfSiwEo3Y55NFgAuRxRYzZIrptCIDvf75oEBIzx0oATqwxz9KAHy/Jh153elZv
        cB4bI29KQBu2cA0AOjl5oAkaUkkDlz90+lACBg3170AShoxH84z6UARbtx20ALt28UAFACZHrQA0kDJP
        3B973oArj3NaLYBd+KegDHJJz0+tAEcnTmgBifdoAY4wS360ARyS8cAhvXFUjRbEOWIyTzTGNOfm+lBo
        tiMf6sUDGLwTQAg4HNABQAUAPVsgL2oIZKo2jGRQIVugoEOOc0ANwep5WgBcp6GgBMd/4PSgBev3eBQA
        c0AJksdvpQMAu1iKBDmyCX7r0oGJgigBV6tQIYA3Y0DHYYdaAHr0qWIkVSIWbqM9KVgHFg+COmKpAFMA
        oAOO3DUARssm48/rUNAJgjr1osBIn3RVIA8wjimMGJIBNAhxHmEj+7QAm4gZH32+6fSpYEigKoxxSsA5
        vuUWAarlVApWQC7s8mmZvcepG3A+9QIac555NAAzkLjBoAapyOeKAAkHp96gCRQVUMTzQAoYtzQAj9Fz
        QA55NoC9/SgBqtkZzigBc+4oAM/7QoAM+4oAMr35NABu3EqBwKAJYl2KR29aAIznJ5oAjbrRY0WwmaLD
        HRlQfm5FFgGzorsSg4NKyAhUbRirQC5pgNH3moAjR2V+fu+lACTsrAEj5T92gBnzDqeaBjOSsoH+sONp
        9KC1sRM2Tj0oGSIuFwKAI3OxsjndQMjdSGwpwe9ADt3yrtUEUALuCPkABm9KAJfMK/IT0oAXHHtQIQEZ
        yfuD7w9aAD7v3xkdqADJPymgYxk3MV/u0ANznmgBx27BkZP0oLWxAcZ46UFCNIRgCgBxO45oAjbOetAC
        ElOf71AAVxwTs9CO9ABz6BfagAw56HigA5HU80AGCfu8HvQA9SNu8D7vAFAEivtGM+9ACq+98UASs2wB
        R2oM2DTFWBAzn0oETmgBo++aBEvWgh7iZHrQSGR6ipZotgyPWkUMkfBA61SADvY5HSmAnmbeP4/WgBfM
        bv1oAdGxY4P3aACQKHITrQBE4OOeTQIWLOwUDHc+1AEb70bKn71ACbtny/xetACKSXy3WgBx60BYKAsF
        AWEzQAqoCWNAhANoxQBKgO3gcUDGN940AJuTHIyR1NAhPlk6dB0oGG7dQAb9vDAkdqBEiFioyRmgYx3M
        ZMndeKAGvOWCg0Gb3FK7zj+7QIPmYfKCD3oAkXkfLwKAF59qloQ9elKwEqPhQKVkAvmU7ASwKrNudQF9
        e9FgJ32hj5ZyvbNFgCJBPKkZIAPNFgI5YsyN9cUWAhkTcMH+H1osBANxYsfu9qLAMnWaNgWOQapAAGC2
        KYEe7cQtBqtiWRccDnFAEaSbJE9PWgh7jlIZmO4igQigkcHIoAB940CJRwCQA/rn+GgA74BLUAOQYz2q
        WAwc0rAMYHcSeVqkMQuw+7wvamIepJHzdaAEcBxjOSv8JoAjbLLyu0+goAavCjNAEgBCg9BQMa3Unt60
        AJQWtgoKI3+8aAHLjaMfeoAY7lWIJ5oLWwgZD1GTQUSeaojABGPSgBi5lLbTt29Se9ADVYOMgcUGbHj7
        poERxA+lAEpdlZc/doAkfEzZHCjpQZvcaJGI6ZoESJkqD0oELg0DHr0qGhC7yBjbgf3hRYCRDlepPuaL
        ALtc9OlFgJFwFAYfN3osBW2bBx98/dNDYBuD8ilcCRTsUEc560XAs2tnJPkxgYXkk96LgQyKROwxz6Ci
        4EyN8o5FFwBz0ouAvm+U/HOaLgOOc0XAfkrGNhwT96i4DURlPy8CoZm9xzZzz1pCEoNFsLtwN1Ax6udo
        ZOD3oM3uO3B/nA60CE8wn1oAQbmbI4PrQBMAwHzHLetAC0ARvHuYmgCOQFRz930oAYDHj7v6UALgP04A
        6ZoAYx+YlwSO1WnoWtiJtwOWORTuUBYIuV6N2ouBEyOFCA8NzRcCJiSnJ56UXAiPJ2f3uaLgGSatbGi2
        GSnA54pjGKSBwN/qD2oAYTHnu3vQAhIHI4FABz1J+WgCVGj2jigBBjfxwKAJhnFQ2ZvcOfalcQc+1FwH
        qoIyTRcBrDBwKLgJyPSi4BzTuaLYSP77UXGO5qkBE8hVsUxjXkOBwaAJgSwBoANuPm71DYgBLc0XQx69
        KLmT3FMjQ8n7rUriDzMcAcUXAkVsqDRcBeF5yPzouApbcgNFwISrk8Hii4Ccj7x5ouAuHP3TxRdASJwo
        B+/3NFwHMTtGTzRcBq9KLgLh+xwKLgOj3A/Mcii4EhIJ+XpRcBKLgHQUXAKLgNAbecHii4DmHPzMQaLg
        HHrn60XAKLgFFwJFPyjpRcBeR0Af1z2ouAm6PG1eZv4WNFwGN1ouAN92i4DIygPI5ouBMHjPy7ePpRcB
        cbeF6UXAcmSfl4Pei4D5ZcqFAOKLgRsCDii4CMRtxkZouBFuQdRzRcAUjLEdKLgCEbDzRcCsw5NFwE2Z
        GaLgK2AmM0XAE+4QD85+6fSi4ERCyJgcMtWjRbEeSfvdaYxN3l8+tAxRsXgjJoEIcH7nHrQaLYjYjccd
        KCiNxyeOKAG0CJFGF6UALQMerlQM8rQZvcdvVhlRg0Eh8w+8cigAyO3AoAY5Bbjr60Gi2G4P3Sfvck0F
        CkuU3g42cAUARFSpwevWgBOO33vWgBUyCQTzQAxulADFzjrQAEN68UAOPC4PWgBq52jFAC7M0AGCOKAE
        L7TigCRMsoNAAHKuRQBOhySTxmgBYHKEjGKBDhId54qWyGTId2TSuSSQ8KaLgRknJwgPvRcYZb+4tFwD
        n2B9KLgBYjilcAyT3p3ATPuKLoBeT3FF0AZI64qkBG7kMRTAepJUHigBjSEMcUAJndzQWtiN1fccHAoG
        N3leDyaAJUbKigY7KDqOalsAYjbxwKVwIlcqWGKpCEHIzimAb8Hy+zUEMkWTzFwBhulBIFpYeN2VNBot
        hjA7jn7vpQMesaOoVvkRuRjv9aCGNcgsdq7R0xQSN4PT73egB0crZ2HnHegZIetAgoAjdjGxIG/d1B7U
        DFjfYcA7h60APaUk0AJ5xTnB+agBdrn7p4oEOR2RsHrQMmSUnNQ2Iem0LuI+Y0rgTIwZQRx7UXM3uKp5
        ai4hFTA3daLgL5jehouApHmrz1ouBWngdAFU/K3JouBA0zZ+c8dMUXNFsG/zeI+AOtFxjJSIyCvT2q0M
        QybvnJKe47/WmIVbpXUiRevQCgBiymFR15oGOWSSMnaeDQIQSKgwwy1AyRZRgED92PvD1oAUOVfcf8ig
        BWmZiSfumob1ATLPzGdo75OKVwF/HFO4EbqXYg9qLgNEp3dKpATbtw5AA/vd6YgHThtw9TQBG/zsQT92
        gYhnYrg/dFACNKqxrj/Vj7woERtIc80Gi2DOaBhkUDE8zHFADGO45oAcreWo96AGnYshBGTQArctn+Ds
        KAHQ4y2BgUAKcZoAkQ/KKAF3bjtoAY8hUbOwoM3uLG5VAKBDvnPIOAaBEiBsc8mgYvmEHHWobMnuPWU7
        RxSuIXzT6UXAeJHxxxRcBwyRk9aLgVd+09ST/d7U2BIrFhkgKfSiwEkKNIxTcArUWAmVpI1KI5G3riiw
        CIkkieahIK9c0tAHYjXjHz9zRoAg+/RoArYzx96jQB6ZC4JGaNAAOQ5FGgEu7PJqGZvcUSIvBGTSEJuD
        HjjPag0Ww5O9AxooM3uHmmLp3oEWIj+7FACONzbOzc0AOU/KO3agBjvhiKAHo2UBNAEMnMhxz9KAEMio
        uCDmgBqspGT0PQelADZCYxk8k1aWhotiHG3iqsMjd9rH+dFgImk+Y8UWAjYknNFgE8vdzRYBjI4Y4PFU
        jRbCSFVRfNGT2pjGdjQBGn3KAEkBAy/Kn7ooAI/uCgBVch+lAybOevFAiRTx1FSyGOXq1KxIig4osAuD
        RYBOaLAG3fx6UWATdnnIFFjRbDRIQzd6LDFjYlRVIY1x5jY/u0wHq2VB/nQAufcUAMYOWODxUsQq5AGS
        M0rDJE60WM3uPYb2I9KLEiZ3c0WAKLAGU7jJosAJIASB0osAnznnOPalZAKEJGWPNOwAVdehwO2aVkBI
        mdoz1p2AY4wc0WAev3RRYBc0WAOlFgJE+6KLALmiwCNj5cEk/wB3tRYBxPPIC+wosA0lTwPvUWAXkdTz
        RYCNvvGiwDo+hosAq9KLAKSB1OKLAJ5p+72FFgFA4osAuD6UtACjQBo+/TsBKOnaiwC5+lLQBN+KNAAs
        78A4A6Zo0AA7Nyx5o0AAiF8sOaNAHuseKNAIWAC/KOKdgIaLAK33aLARt9yiwEWDRYBOfaiwCP2qkaLY
        R/vGmMa8Q8l2zye1ADFPzflQAS80Gi2ICOaCg3OOuStACArvJYHB6CgCwMiFsnmgBH+9+AoARvu0GbGr
        0oFYlT7tADG5Y0BYSgtbB1R+9BRJt2gMaAGMvmHd60ARMMMRQA0rghqAElfDlh/FQA1RtJFACAgD5+R2
        oAUYX5n+b2oANwbleF96AEU5c85oAc2dx5oATco4KBj60APDvj5flHpQAvONxOTQAAk8seD90UASLIY1
        xKd3pQBKkr7R8ob3qWZsXMjc/d9qVhWHrnAyRmiwCmTbxmiwWD/bzzRYLB1G/uaLAAYtznmiwDW+8aBC
        Ept5HNAxYyNgxwPSiwA3BJYZHaqQDee55pgHGeuT/dNAB9QF9hQFhWXC7hzmg0WxDndzQMQH5zQAuR5h
        5oAeeq1LAc2BKS3IPSlYBkmd5ycmqQDfMKnnlfSmAxgCS6jr2oM2OWXKigQKcsTQaLYUn94aBko6UGbG
        P940CsNzn7pAPfmgAypxzsHbHegAdX+Xjb7UAKXK8HrQMUshTkc0CGrjHHSgA+Ynhhj60AG8rwTzQBIs
        jFRs60AClwxeQ528UASAKG4YgVLESiULwDn3pWAkSQg5wcUWIe49jk5osSKjuDwePrRYB5lOeTk0WAaJ
        Tv8AeloAjl5ZDGDw1GgFeS1Z5D8pY+wzT0NFsQOphbAHWixQEbUxVgID5cY96AECeWuc0AMZtzZoATzN
        vFACiZe/JoAes3Ax0oAXzTQAnmnNS0AecvcEmlYBdjSfMg3A9m7UWEI7mMBd27HeiwDi27mqQwpgIXKj
        2HegBQykZK5P0oAjfG44HFAWInHzGgLC7gyqoGD60FrYR1KsQTk0FDelABkpyOc0AGADjfg+goAYw54O
        R6mgBOfUUAPVyBigBTLj/wDXQAZ3c0ASJ90UACviZRQA4nJJoM2PUjaOaBC5X+LkdqAFSQxE9yfSgByA
        7MD75+6fSpZk9xrPhsAUrCFSXBosBPndzRYCRDGF+Z2B9BRYCvyB6UXRsI3IXvRcRIv3qLgSB3D8HApX
        AfJLIg65zUPcBiuyjB60hkyHctBk9xc0CBerUAORtiA0AODmQbvWgB6njrQAv3B5meVoAM559eaADNAC
        g7vloAN2zj+tBm9x0bZOaBBI+HOOaAG8nnFACkEJk/d9KDRbDRIoGEGDQMMnq3X1oAYz88cigZG+9hkH
        FWnoIhwR1607gKRldn96i4EbHKUXAhOadzRbCHd2P60rooBn1FO6AbMCVHei4iJ5NoxVIY1UVwGZiE/i
        HrTEHT5c5HY0AKRhcDnHpQAxA+eDgUATiPPJPNAxFXD1LETDOKVxj16UXENZiDSuMTJPencAwaLoBkm0
        dRk0XELH9wY4FFxjTzKnfii4hAOKLgLJ/q1ouA1ui0XAlXOOtFxkcoJI70XESDOBRcYuCaLoB69KLiGt
        nNFxjl+6M0XMnuKyjarKPmpXEDEnlutFwA8gY5+lFwF2PIxCYf1B/houAqKIzjdu96LgSMcHLnK9hRcB
        KLgHydxk/Si4CsVC8jj+EelFwGElFXPJNFwHkYOKLgPU/KKLgMb7xouAmMc0XAM7uaLgFFwCi4D1AVQ2
        aLgMkZWwSMmi4EgIwMdKLgBl28UXAmjZGQ7iQe4qGBCJMDC8rSAUHdzVp6AC8FqdwBRxUMCxEkckRDtg
        jtSAjAEnAOQvTNAAE3NuPFADnGBigCLBx0oATDnoePrVp6AREESHPWncBW60XAif7xouAH7lO5otiJRv
        LZ4xRcYiksM0XGLzRdAMbrzRcRE/3qLgO6Rii5otiPNFyg2Pjcp4qkBG5LMS3WmA7+BaAJweKAGN941L
        AbSuAE+XyP4qLgLt2j2ouAE5UUXAYmS2FOGouA9g6n94c0XATcDwOBRcBjLhiBRcBNgPfn60XAiYbZCK
        pAEnJFMCN8iUlj8tAD0RXbK96AGyqVc5+7QWthpCjlRg0FC5JGW60Gb3EOOww3rQIeGZRg9aAFDZ7igC
        VQdtAAmA2WGRQBP5ihV2DC+lSwJCd3NK4DR9+i4hwG9mz2ouMauWGVGD3ouApRwdwOF9KLgGdw4HzUrm
        b3FwR1607kj1zt60XRothjjad1FyholbqeV9KLgIJowx4ouAsjBiCOlFwHNytFwImfC43EewqkBCZMHu
        aYBnPNABQAedj5DwKAHq+wY6UAOzmpYDGGGyOppXAbkvyvB71SEIWXPBApjFEmOBz+NAATnmgB6vhRUs
        BrHJzSuAmUH3hz9KpAICCxI4ApgSiTzfmPU0ALvI4oEG7PNAw57/AHaBDHABLCgY3O4ZoAer4AFAEkbD
        OW5B6UCHs7Kx3HK1DZD3EjxK7EDAHrRcksJcF4gh6LRcYqOZAAaLoBSu3ii4h4+4tFwLKoIozM3PZRWb
        3AjRhbLyCWbk0gF+0yI6NACGA5pdQKs27zGyeTya6IjIZI3YZ4UH+LNJvUtbDFG0Y3bj6mlcoSTkHvjr
        VIRASU5xTAQMZBu9aBksSAg5OCaAEChhjP3aABWyxNADmPO/+7wKDN7joxhv1oEPeQqu4c7OKlsBEK7R
        uHJ56UriAorHI4HpRc0WxG7bGIouUKsh8pkJ+VjnFFwHmfP3enSlcAB3c07gRuRuNFwImVyxKnii4AmR
        kHrRcBCN6YJ6VSAPOKRjHU0wI8bfmz1oATzC/B4oAGG0ADmgAw5k4PFAEuVHDjLd6AGMGYkpnbQA5HKq
        AeT9aAJIzuOaAHnk8c/SgCJ+WNAD1I2jHDUAPQmMgk5JoAez7DgGobM3uHmmlckRTl807gS4Y9OlK6GP
        WQouCefrTugICCDy24UWEPQjPHAoAmoADyq4oAl6AVm9wCkAj5YLsOCOtBDHFgxwOlBI9QFXFAEiqCM5
        oAdgjigBo+8aAJCVDDdyKAHvtZ/kHHpQAgTcM0AB/dfjQAjxDA5oM2KRg49KBBlO5INAEiIZFwh/E0AJ
        JG0a7W5IoNFsQHNAwbOzk5WgBqkY44HpQA1utWrWAib7xp6AJTsBG3LGiwDJOBzQaLYhBTuMn6UDA47c
        CgYjTeUvHeiwWIm5AqkFhz9KYWGL0oCwDJb5eD3oAe2CTtHFADl+6KAsSKeOoqWA7n1pWAOfWiwB8/Y8
        UWEJx/FyaLDEaTAAGcCiwDixPOaLARs25iuc0WAeo2rjNFgGySEDFFgsNQlgOOtAWDNAWAHBOeKAsIHK
        jHNAWJUJZQaLAL8x+7we9FkAm/HAHFFgJFOVBoEOP3KLEMTfiMCixIitvGMUWAcH8gkDJzRYBYyq42j5
        j96loBIyxMxGMBfWjQBBGJ+RwBRoAYo0AN+3inYA3Z5osAUWAKLAFLQCRPuijQBjfeNGgCUaADDIHejQ
        BW60aAIIwxyDkn+GjQBdrDqMD0FGgCcHp0o0ABj+IZHajQCSIhAcEtIe3aoe4EbM0bFWGCOwpDJEbco7
        mrVrCB+cU9AJVzgVDAY33qQE0eCgAHzUDGShgRuORQIUvz8oOKBkb+Ywzn5fSgBq/dFWrWENk6U9AGL0
        o0AY/wB40aARtnPFOxotiOcHaKLDHJnaKLDFyfUUWAilYsQtFgBkycZ4XpQFiNm3Emg0WwgKZywyg+8P
        WgYGUxdB1qkBGw+amABiOACfpQA9clQcUATAHyxxUsCPo60gEFABjngkn+7QALksflx7CgBW2jkfe9aA
        ImJY5PJoASgCRPuigBrIrE44agBMKvDDLetUgI2+8ccCmBGwDMd4yBQA6OVVBlXgLwBQAqSKVJcjnoKD
        RbELAgDd1oGKRvOPSgze4CXH3uR2oEKCSMnk0APVo8Yx8/rQBIs5QBeuaAFKOvAOBQA+PIPJ5qWA5nw2
        KQEiHKg0AOoAeudo9KAGNgnj73rQA5cgckZosZsax5NArCHI5P3aDRbCOd2ABgUDHEAHAOaAI2KbjkZN
        ADSR24FABvxQApk2pu71SAhA81t570wFYAHGaAEyPWgBjZycDf8AXtQAsY3nrkDuaAHk7jmpYCEHoOJD
        90+lIBWI2cGqQEDFMnIyfWmAkRBkOOlAE0pBoASN8IBUsCeJBMDkgY9aQDHOF5qkBEc5pgIXxwAd3rQA
        5JWztagB7YBoATfjigBr5YZxQAkTlOv3aAJGYMS6j7vAFADQ+x8UATA7hmpZmyRZVQYIOaQrC+bn7ucf
        SgB6uXGD2oAFlJfPJP8AdIosFiRZTu5G32FFgsTPPJIgQdFrN7iEaV2C7fvD71IZagvEgDBh87j5D6Uu
        oilcMGckd63iBXk+4tD3NFsRNjPHX1pFAjmAlzkqfvY71SERsSVyeppjIS0g6dKAHqx27z95eKAFxj+d
        ABmgCRPuigze4tAh6zIq4PWpYWATAvxwKQWY8tuOaDRbETkBjzQMiYjd1oAchG0c0AOWUxk45z6UAA2g
        fMOfpQAyQE/dOF9KAGhSEBJy1AEe4tzmqQCr1NMBmDkfWgB8igtmgBo4agBWABLZoAAxYZoAlRvLQn+9
        QAxAFXFADuv3Tg96AJIzkHy+PX3oAjYjJxwKACgCRPuigAIO4VLM2S5w9IVhxIzQFhyn5eoosFhryKrY
        K5PriiwDVJZskUXEShcDdRcBxbcoNFwBH2wsKVwJi25VPtUMB7n5aQEOCeccUASIeU/GgAHSgCRcFQB9
        71oAlXIXk80EPcXnGc0Ei4NBoth6527lOCvWgYF9sbhRx1oIe4u4dX7jigkMHvyaAFQdaAG9OvFAAd6c
        g8elACmZinzdaAIycrmgBq9OtADD/rTQAr/doNFsQnjrQMZI5UYq09BjFfChqdwIZGZ3LH7pouA5Txxw
        KdwGPndknK0XLWxG+NxxwKLlCKQCeaLgIOlFwDds6dWouAEBOM0XAkQ/KKLgA+/RcBcrvORn3ouZslC4
        G4cr6Urkh1+f+E9qdwGsd2G/h9KLgPPJ+XgUXGNIMXz92ouA1zx70XERx/eouBMPrRdGi2Gt1ouUN+fl
        wfu9KLgI6lQuevWi4C9Og3+oPai4D14UYbI96LoB3PqKLozYc0XQgwaLoAw5PFF0ADOOTRdABYilcB4P
        lKH7tTuAtFxB8xHygL/tVm9wHKrDbubefWkBLKGT51P3qAIw7KME80DGsdzE1aeghKq4D1k2rjNFxjgS
        3NFxCt9ys3uAwgbV+Yj2pAPOM4XJb1oAT5Rw4y3egA34+6DigYbd3J7+tAg3FPlH3/4T6UABnMfIH3qA
        DGKABW2EkfxUDFjPld+aAHF2dmbZkHoT3oAjB2jhcOetAEqjYoDHmgQpcrxigYA569aAJI1YAsp4oERk
        k8t1oAk80xxjbzn0oGR4oEKwO3pQAwZAGT8vpQMilO2QlejUAMI28UCEU/NVp6AE3WquBGoOKLjIz/rD
        RcQp60XNFsFFyiNh8xouARnDUXAJPvmi4DaLgRGSSOU7eh9KLgS7ZPX9aLgIXdeM0XAUEnr1ouAHii4A
        W8vn+9RcA8zyeBzmi4C5TZyMmi4EW/HQcUXQCbkPUc0XAkUjbxwKLmi2GP8AeNFxib8cUXQDGJY5ougG
        H+L6UXAjSNWHBy/pRcB20H5ZECle4ouAEhl4JI9+tFwGqhC+Yx+VegouA5gqrhenWi4DVOFHai4Du+PW
        i4DkfacUXAe8vFFwFiOQDRcze5I42nd3ouIVZePSi4EsUuAaLoBRIw6/d9KLgL5ufujilcABzzTuAtFw
        EK7zg8baLgRtJ8x5JP8AdNFwBZGycrj2FFwGhy42kbR60XAYwAbAbd70XATeV4xRdAGc0XAM46n5fTNF
        wHGMMmR0oui1sQ429CMUXRQm7d8pouAZ2cZ6UXAekuDRcAmm6t/d4FFwIc/rzVIBDkck/LTAVAMll71D
        YDFl+f0PvRdASGYoQRyTRcCSRwGwB83rRcBMGT73VapbAIuS2cUwFZyCfQUAG4nvj60APVkCjd1oAaxB
        PynigB0cm0EUGb3GkljmgQ0u2cLwR1oAUHd049qAF37SAWIPoKlgWc55zmlcByylRilcB2Q3JYg+lO4D
        o5Np3BixTjBouBI2Sc4C55xRdAOWUxDjvWb3M3uAbY+aQh7OXGQN5PUHtQIgKA/xZ9zQMa+AMVaeha2I
        W+7VXKE42DLke1FwIu+Ac0XAa/SqRothiuQKYyRW+UE8UGb3Gnk8HigQ5W2DPWgBrOZDu9aBDlPHJFS2
        arYFbc5HZaVxkom3DNFzN7jiEZMsOaLiI2jUrxwPSi5otiHbt44ouhjkcqcEAD+9RcB7SHPdh6mi6ATO
        7mi4DZMEY5RvUd6LgQkEfeABouA9TxwRRdADuQB3AougGudzE0XASi4BRcBy8xOBzzRcBxPoR0ougDPu
        KLoze4DJ70XQhokw5HWqQEwAcZJ5pgBGOKlgPjcqcYpXAe28nIOAaLgJuLfKf4e9FwE8zfyeKLgSoRtH
        NFxDvMxx/Wi4x4yByeaLGQZ9xRYA3ke9LQBckjNGgEuD5YqHuIaAQOfu+lICWKbgqBhaBjHHTvQIkHSg
        CRD8ooAXNBDE8zaeeYx94etBIeYw6ig1WxPEdyA0AP3kdqCHuJnPNBIu/HFAxpkYsNnBHWgCSZluAFUH
        K0BYbu8n/WcntQIjZmckk8mgYH7ooERL1agBF6UAMd8MaDVbCbh1bnPSgZDMzqSG5WrVrCI1O5QRwp6U
        9Bi8jvTsBG0LzE7DjbyaLBYTI9aDRbDJCPWgZB1NAEi8KKAGsMEsKAGhgeX6HpQBIikKCeTQBKjoVG4c
        0ASgjaMHAosZvcCWTlWHzUWFYXaV4JyaWgBg0aAHPqKNADn1o0AY8Xzb/WjQBtPQLC0Gi2CgY0f6ygBZ
        CWIWgBSu04HNACE468UAIPv0GbJRnFFhWF+bsaLILApKEnqWpaBYTbtjce9PQQpYscf3RRoMeh85cnjH
        rRoAu7IzS0ASoe4g+fscD60gFDleDyaBhkk5J+X0zQA5MHOBxVq1hDcYqtAEX71GgE3H94j2FGgCfwvj
        JrN7gDyY2gc0hjjuaVNvBxQA0BgPmOWoELh+xwKADp9/n0oAEBYsGOMdKBiBuMuOD0oAUA9SDn+8elAg
        J55IP04oAPKH388mgCRVeTZlvkUHHNAEKl2ckHAzQMew3nDHpQIN5XazdPSgY8yrJKWB4NAA8pjR8c7j
        QA6Ufu1oEOUNtG3KnvnigBrK2S6fd9KAG+aw69aBkch3EGgQp60AMePcM0AQbSDgVatYYEEdaegAclBt
        PPf3o0ERtgrwOKegCCJmjBBx7UaGi2BVKrg0aDuKCMNz2oGQigBcUAJQAFtncHPYDmgA2hOMEexNAEb/
        AHjQA9CNoA+9QArAgDPWgBj8se9ADcH0oAkUmMDjlqAHbccdaAI2B3HigB8ceVJORQWtiMjBwOaChKAG
        MCTxQALwWzQBEVdj8nWiwERSUSEE80WAeoO7nqfkoAdJgEbgSBxQAkm042DC0ARzHkUASDpgH94fun0o
        sBIhyBg0WAXn1oADuj5PIbp7UGb3EDeU+2T5j2xQIlyT1OTQA4HG3mgCVjmVcc8dqACOTaaNAJC245oA
        aX2HI60AKH8z5u9ADG6mgBvmY4zQBGzZYmgBMjt971oAFBDc9aAsK7bGJHegCNgik71LemBQA5T5YBBJ
        J/hosaLYSWMeW+QF9hQMhOBxmgAoAKAHqm4e9FgGtsVsEc1SARkVlyOBTAap8scdalgNaRZCSVO/ucUg
        CMjPUUATiQgYCgj1osgF3knZjAbmqQBl25zx0pgB+Ujd90feB70ARS5yM9aAAtk7e1AD0G04oAdJ1FBm
        9xTnr2oEN6Mc0AOaQA4AO71oAcuQu4n5qlgL5uaVgHxncc0APZyDigBY5eaAHtLzQAglJ6fpWbM3uSI5
        B6EUhE6NncTQFiJkBOc0BYjbGcL971rRbGi2E8vJ+Y/NTGQzRDJoArlinyj7/wDCfSgLClgyAiqRothF
        B2imMjkyGyx+Wgze45ZABhelAhXywUr170AI5BY4oAjA3uR021LNFsTJJuyCaQxybVUAfe9aDN7jg5HB
        5P1osIcTuSg0WxE/C88UDGF9yqP7tADjOzHJ+6e1FgGiYbvl6UWAmB3DNAEMvegBkUqqCNgLetADUmLv
        5Z4Dc0ASE5P6UAMftQA40AOE4iAC/eP3qLAI2CcqMCgBUKBuRzQZsc7BCSvQ0CI3ABwPvetUgFQ88nJp
        gT1LAMP2OBSAkRWZfnIIFACtIAmV/i7UARExqcHk0ASRMmCT90/dFAAMgYJ5oAmB3Y96LgBjDc0XAkUE
        KBms3uZskUZATP3utIQfOehwPrQIOe5yaABQwfJ+7QBMs0akjGKAEGSM4wvYUALx1HAoAKAHR4By3I7U
        ASMGzljke1ADTJg4A4oGOSYk4xgUAPd9rEUAAJIzQAvNACGVo/unBoAYXaQ7n+8etAhKACgCN/vGgB0f
        ANAEDvhiKBg33N2etAELuV2sTlT2oAc8ioMHlf4cUCGqSRkkZrRbGi2GeaYmbHOadyiI9TRcCNpCpI2Z
        HrRcB0LZLEjb7UXAazbnK0XAbgLxnii4Bii4D1cqMUXAljTedx70XAcx+YpRcBAu1yKLgSDhqze5m9yR
        +lIkjUrjBHNAxykZbHHtQIQA4oNFsNb7xoKErRPQBKdwDAHzZFFwANuGaLgJ5m1yKLgNcea5z2ouBLGx
        KDJxRdAPwaLoBPxFZvcBefWkAc+tBmxADuNBI9+lAEa5xk8rQMXeAfl6UAHmqOqkmgCWJgQSOBQIRSgb
        kc0AOdih3KcL2oGN3F/mbqaBC0APQjaAPvUAOLGPqclqAAgLwOGoAQsY+pyTQMXAX6UCDI9aADNAAB5n
        H92gBGcyBR2oGKzbDgUAG5CMsOfpQIMjqOBQAp5QUAQnrQA6MgH5uR2oAkJUN8xLP6UANCBnzgL7UASj
        C8ZoAT55XEan5TzQBO0hdQWPzdKBkJcqcYoAUNu570ARt940CE7470AKT8tAERXb81AAZFdAGH40AQnC
        ZZf4OgoGKFPb60AMbhjmgQ3Jb5e1AxcIvBGT9KtPQtbDX5AIHFVcoUtk7e1FwI2G1iKLgJRcBGIwOaLg
        NfljRcBOccgAf3qLgOTbjh959DRc0Ww7OewB9BRcYqShS27kdqLmb3EjY/M5PzL2ouIenyrg9etFwGsH
        LHaePrRcBvmsDtY5AouAuFX94pJK9FouA05k3ZAXHOKLmi2K+WPOcfjSuhjGhdjnNFwHK0sKgdAf4h1p
        3Aay7TuLbvc0XQCeaT249R1ouAxg7HIYkepouA3ey8HrRdAMc7iKLgSDhkzxx3ouAxZMMRRcCZpMhdo+
        b1ougHeYx68n1FK4CYP36dwJoWyATxRcCRim45HNFwJPNQRhUG1h1rN7mb3EU7gCBSESqUCjcOaAF3xj
        58crxQBG5EbZXo1aJ6AJjb1Py07gRvjcSOlFzRbAM44UEetFxiH3GPai4BvxxRdAMYlm9z2ougHiTbGB
        RcCPdnnIougI2B3ZJBWi4CPg42jii4AW3Hb2ouAu3bxRcBvmBXIAw3rRcBQS0hJ5NFwB+Uei4B0fnjp/
        Ki4CT5K/KcHvRcCsMEcdKLgWIv8AVii4D95HHalcB6BiokB/d/xCncBhJJJk+Y9vai4DAcPyRRcB5OTR
        cBjPhgKLgT5Lc5ouAbjny/71FwDcpOXB2jhh6+lFwI3cqxA6dqVwHKcqDkCncB3PrRdAPilMTN70XM3u
        TDHljFFxEQ+/RcCyjIFGRzRcA3qrZQYNFwJQ7OMseaLoBsiuw2g8NzWb3EN5EY3daQDY+tWnoMcwCndm
        quBDKd+T1ouaLYrnNFxhz6ii6AR3I2jrRdANfEjnfyD0ouA0xeT1IzRdAAlB/iP4UrgKDnnOadwDKdxk
        0XAilfBG0cUXAejA5zRcCMs4PHSlcB0byetFwJCTMSrdqd0AUXAGOF3d14ouAi8Ci4CCZkcjqtFwJhNH
        J1FK4Ctbqy5BAH1p3ArPH5bHHNF0A5GyoJouAuR60XAkt3jV38zv0ouAwsmTx83rSuA9Qdop3QDW60XA
        bwDk/c/iHrSuA9F3rg07gNaLy2JHP0ouA9C7OhBx1ouZvcAxXg9c0riJFOVBNO4DGfB4pXANm/n1ouWt
        iSNdgJp3RQLK2PuZ96Lmb3LCy7V3d04oESoflHI55oAdzWb3M2NH3qQrEx468UBYRSN3WgLDnDljg8fW
        gLDVXc58znHSgLCmZmYqecd6ADzD93HHrQBIowozQBIhBUc0BYXzdpxkUAKG3c5oATzAvDcjtQFgbLBS
        eTQArOV+goDUTzaAD/W9e1AC5J68fWgBASWI7etADiACQOfpQFiJ/vGgLEcj4GKAGKdwzQFhrZzwaAI5
        Oh9aAsNH+rFAAP8AVitFsWthF4UZ4plDW5JxzRoBG/K0aARjpRoFh3l7/unB70aAG0PwOAtGgCeYfSlo
        A+PLHOKYE46UAIOHoAOvmY56UASuRheaze5mxT9aQgK7fm70ARsxZskAe/egByfdGGyPU0Gi2GsrA7ga
        BibiRljzVrYBkrbBx3qtAGKAoxmgAYs4CqcUASjagCtzIOpoAXPvQAgG9yP7tACtKSelACKcvk8Vm9wH
        M5B4FIB6ElQelBmxjM27CZBHU+tAhynIyeF9KAHcHlelACD7xoAc2c8UAN3EcUAMaQ5PFADwR5YLjOel
        AWEDFRg0ATRMCCc0AAwRx96gBGfaFH8Q70AKSSfm60CDrQAZydtAwK7eKBBQAYz1JT0I70DJFJxlgAPQ
        UBYXKnp0oCwc9z8vagLEbgFtgGA3NAE0LfIST7UAROPmNAWG8dBw1AD0yFGetADqBEbD5jQBPbEx4PrQ
        Mluk2kEc/SgQwEsM0ARufLbP96gYFcLigLDkZPKCgfvj90+lAELnYxI79aAEICqMHJ/u0BYjYPKu3hQO
        1ADVAVRuBJ9aAsGFPRiB6UBYY0YJznPvQFhyjauMigBrHnrVrY0Wwm8qcAkn+72qhkcpJIJG0+lACAZc
        0AKybmo0APkXgjmgCNnwx2jiiwDSc8nigBQTjhQR60tDRbD1ZNo3/IfbvT0GNfliQMD0FGhmxUG07u9G
        giQAOSxOM0aANA2jFGgCpGJS3I4o0AaDRoAxuWo0NFsRsiE5IOaNBhtwPl4WjQBN5BxRoAxzuGaNAGKp
        Cgrwe9LQBrTF22gHH0pgIxAXrigBFyV+7gf3hRYBjDzGK5JC9zRZAJt2/NRoBIJSYxt4PeloA+NmCApw
        G7UaAO27eC5z7UaASKoVQzfMD0o0AFkbdzkmnoBJuzyaze5m9x8cu04pCJGO45oAQkDrxQAVatYAz/sg
        +9VoAxs7jn7voKNDRbCb9vAGBS0GISTzT0AM5o0AaActj75+6fSloAwcDJ+7T0Aa5jx0paANXG3jpT0A
        CSnI/io0AXG3ijQAzQBEx+Y5Py0AOTDHglB2x3o0AcXKyEFdvtRoAOBK43f6v+IetGgCXUBgIYnIPb2o
        0AgYAH5fu0ATREbByKAGvI0TZ6qfSiwD1kcgLEdq9896LAJIDj5eD3PrRYBimPaPl/SgCRCpXjpQAyVu
        d4OStADkOxsglj120WAm89mGSoQeoosAKctkEt7miwCSD5zQBG/agCVSCBt+960WAUbu55oM3uNEhjfj
        nPpQIs7SqKxPB7UAPLBvmHANADfMx0P60BYlRsqDmgBfMIOBWb3ATd53yk42+tIBRWi2AMqPvDIpgRzs
        FClOh7UaGi2GPF8vWjQZVYbSR6UaANJI+fuvFGgCMMMvvzQA665Mf0oAjiIEYycdev1oAkzQAZoATI9a
        AIJf9YaLAKkjqANoZaAJlYFQcbfagA3D1FAC5oAKAI+dzbAGP8We30oAdGVCjB496AHDnpzQAUAGaAI2
        O5iO1AEJbZKV9KNABjk5o0AerkKBRoBLGzuyAHjmjQBQNnykjIo0AXPGe1GgDQ+HwOhoAcx8o7QcgelG
        gCFgw4+960Gb3HpkHk80CHN97JOV9KAE8wZwvSiwC+YaLGi2DJPNFhiF8cbiPoKDNliMEdetZvcHuSnl
        lpCJ0UPI2X20ABiEPLfMP4aAJImWUFZByO5oAi4Mhx0oAlxQISgYKSzbV49aDN7iurBvlOFoJHoWIAc5
        Ws2aLYUBQxxwKQxzIGOeOaBibccYoEFAEsDLu2v8q+ooAfOIyxjjYsjc5NAEaMhXkZPSgZIxUxqFGDQI
        bgySqrH7vegCFmKsQfu+lAAsvLYXavrQBESGPB3e9ACkfJQA0A4+U4PetFsMY74Y7elMCPOWY0AIAfLo
        AaG2LnvQA1mLncehoAGl8tRtHBoNFsNXpQMY5+Y0AJQAqHrQAgoAesvlKMc5oM3uLvxQIkUkqCT8vpQA
        773+r4HegByNHnpQBIyiRjjgDpQBEwdjkHigA+UfeGW7mgBcjDY4GKAGJwtADJeooNFsBZM8jJoGRvjc
        cDArRPQze45fuincQ1mIYgAn6VmwFQ5PPH1pAPbk0APT7ooAH7UASr0AyPpQAvPqKAI2Vix+cj6UAIoI
        LZOT6mgBAxUYxQBIpJUHpQA4ZPegABJ6EUAHJ70AHPrQBGwO7nlaAHrgjjgelAh69OaBjkG8tz0oM2IG
        yMmgQvmAcD73rQAgJL5brQIcz4YigYjHIU0CHLyzYoNFsNVW6kErQUISueOB6GgCUOrRhR95e9AEe4vy
        3Ws3uA4Oo2owyrc0hEjursSvC9s1othkT/eNMBR/DQZskcjd1oJEoATfjpQMf5vyrWb3AeZSTSERswJJ
        bkdqDRbCJwTk/jQUIOQKBCOMg0DG/wDLMVotgGqDjn7vpTAcXDLtHAoAiMLdmwKAEwV4LCgBrFc8jJ9c
        UANIDnA4C9BQAZduQcD60ANcEj1PtQBGHIGKAAOHbb0b1NADjkHaTnHegBCAvFaJ6Gi2GMVBJYZWncY0
        lf4Rhaze4AGTuMmkBIpAHHA9KAGsCSTg49aAFLZRVPAoAl8oAHmgCOJdoIoAmto0kMm4chDQBWbGeOBi
        gBKAFLZXbQBEQUy39zigBjDaf1oASgBFkKzr7CtE9AIZXQyEsMr/ABD1p3AFdwBtPHalcBku5yqg4Lct
        RcAYhjx06VD3ASkA9JNpxQBKrgvnIoAeQxOVPB96AELsnDA/WgB6NuUHIoAcV2/N3oAekuVFADgQeW5z
        0FAAchOTzQA0dKAJI3ROSOaAEkcSOWHQ0AIc7Ofu+lAEa43HAwD0oATD7B83y9hmgBqlQPm5HagBrSBT
        hgSfWgA3BuRwKADNAEc/QUANEq/cIJx7VaegDGwWO3pVXAdHOIwdv3vWs3uBJHKZFBYjcaQDipX5ieD0
        9qAIyDIxDn5u9AEc+YgFPKirT0ATeoAKDBaquAZMfB5ougHGXCrnii6AkbfONucAUXATBEYz1ouBEQD1
        Oz0I70XAQff5AX2FFwJBL5bnHei4C4bzCQeKLgTxyFTgnJougHltxJyKLoBmzLMSRtNFwGhwnC9KVwEL
        BvvNs9CO9FwJFkwOcL7CncBfM96VwJEYuMH7tFwF/drwB+lO4AQx5XhaLgOjkKHBPNZvcze48qHk3HvS
        ES8KMZoAF6tQBGetBotiOQdKBiGMOdvZuTQBBJjefbigBmN/4VonoA2SX7ntmndAVQPNIz2NK4Ejy/NT
        ugE8w+lF0Amc80XAKLgL5hHGMD+9RcADb+Mkj1NF0A9QEXDcjtRcBcjp/FRcBSWj68lqLgDJuTH93mi6
        Ai37+DxRdASRoyggHAougHxn5Bk5NFwEJAduaLgOj+6KLgNcKxOCA31rN7gRMpDEdT7UgE3FeMGgCxEd
        0YNACbYy7ZHNAAi7VH9z0oAR/mY+Xx61aegD1xtGBgVVwFYjbRcBqfdouAuR7UXAkGcAEBR/e70rgGfR
        s+5p3QC5PqKLoA59RRdATxtk7egrN7mbJVAV8ZpCHsSxIwcL0oAaJJJvl6BfWgCVNxUZPNAABtYtQA5w
        5XeD1oAapZhknmgB8f3vegze4T8sDQKw6OQjPFZvc0Ww1HLNg8Uhk4ULw3zDtQAnmFeCaAFB3c0AFABl
        MfN8vuO9AAZMHgbfYUAHztyDxQAm8jg8mgBd2eaAI2zuJPK0ADFSny8GgBhkZVUHk0AI5LNmtFsA0uVp
        gNJ3HNADSH7HA+tADJM45OTQAxelADmG9ME420Gi2IS2eaBjDkng0AKCABkjNACMcHqB9aAFQknaaAHs
        NrEUGbHp90UCFzQA7zvlVPSgB3/LSgBwO5mXcRQA5F2qADmgB3PrQBFKDkUABjyc0ARtgMRmg0WwJbtJ
        lwcDtQMiJLRyE8nPNWtjNgRnpVaCHxt5ak9M1mwBZUcbmHJpALkHp0oAC+OKAJE5UGgAHDF+60AOIwf1
        oAaWcHCnigCRCxUZPNADufUUAMbrQA3BP3eD3oAQnZyvRqAJFG1QMigBG60AMD4fFAEitlsmgB5yTwaA
        FU8UGbEm+6tAhU+6KAFzQAtAWEoABgtydg7Ed6C1sTJM0RJI49BQURl45fnYYJ9aAEIA6dKAEBz05rN7
        gKwOFGOaQCzfdAq1sAlUAYoM2HegVgwRy33aAJFIwMcCgLAv3s1m9wHMCT8vB70hDwVMY28EdaDRbDTE
        si4UYVuaCgjdYkG7kL83HtQAnmLIzOOA3OKAIT1q1sApACbs1QEWS3NACZLHaaAGNCAx5oAeqkKADQAw
        7fMORk/SgAZFY5HAoAYMB8FtnpjvQAS53nIx7UAQP940APTG2gBsnUVatY0WwkgyQnZuTVaDFZk28jkc
        Vm9wGKVz8owfWkA9oyTlutADwqhABISf7vagCNxjG9T7CgCQAgc9aAHJ96gCQS7WZv7vAoAr5+dyAHz1
        B7UARgYHBz7mgA6sPrQAku4yEg/ux94etAEThsYbk0ANXpQA08O1WrWAgbg1WgBvK8YNLQBN27n1o0AO
        +O9Q9wCkAUAAKBuRzQBZV1RdxGR2HpQAod5Pv9KAE2Kj5XpQBMGLjOaAEH3jQBMv30oAQDr9aACgAAyc
        Dk0AFABmgBr8jA++fun0oAgzuJUD5/4T/OgBdoXgUADSELigBsbZyelACIfmoACPMd/agBgLMMjg981a
        tYCOVFcg52DtjvT0AUqdxG3GOwqGA1cFuPvetICyhwoBIzQA15UU4x83rQBDIxkIGMj2q1awAy7Tiq0A
        AcfeGR2o0AApk4PJFGgAshy1GgCLMrDa27P0paAAwH46e9PQBzcsaNAEyY+f71GgBt2nFLQCSLoaNAJo
        FQqCMBu5PejQBzhd5CDinoA3Kdxk/SjQCNmjLHj9KNAHxNEAdwyD0o0AF6UaAPWRojwDzRoA5nIPFLQA
        yTzmjQBAfmNQ9zN7kyY+YsMjtSEOgwVIkIOPu0AKvmMM5/WgBeR1PNBotg3Z47UDIZ/3fTkH0oAgZdqY
        oAiaXauMgVatYCMncmarQBoBxRoAu3fx6UaACtmRDRoAp+5+dGgDB0oAXtntRoAUaALvK8YpaAGSwyRg
        f3qegCbXP3WJHvRoBIm4KNxyKNAHtGvkuxGQego0AhPXltzf3aNAEIfrwo9M0tAHRhgW48w989qdgCIg
        /KWKgdD60WAmaJM/Moz7Vm9wIXUwtuQgBu1IBvmt90/nQBLEGwcGgAUYGc5NAApkd+MgUASKpR8GrVrA
        OYjdjPNVoBEfvk9vWloAMdhyOd1PQB6qMYfkD7tGgDgS3Xk0aAGUH3hz9KNADIPTpRoAYpaAWG6LWYFg
        NHsXj5vWgBZHcAYPAoANx8zLHmgCUOR0rN7mbJRH+7Ejf6r+IUhC/wDLIenagBFUSKAB83rQAySM25zn
        JNADkbcNtAhclOMUDDOT70ASKGxxwO9ADGKljt4FADlk2jFAC793BNADHVwxCnA+tABGDznk0AOQcfM5
        A9KAHKFUsynj3oAiLbuTQAmR60AIFyzL2bmgBvOzkYxxQBEXI4xWi2APmPJ+76UwAyYOFHFADGJZs9zQ
        A2g0WwDnpzQMbIRjrQBCeVoAaucUAOMayrjOGFACRBG3CUZI6UAOQ5UGgB1AEiHgUAMf7xoAdGyA/MOa
        AJwR26UGb3JFPyjmgQxj8xbqV4oAeqkKPzoAY8hViKAANlWJ64oAhEe7mg0WwM7hdg6CgYkMQncxO23P
        OR3oATD73xhQOMA0ARngLzub0NADmPPIC+woAeh+UUALQA9ZCoxQZvcdu3c96BCnigBADv6UAK3WgAoA
        MUAIZkXgjmgADBhkdKAEH36AHHrQA0A76AHMpB3H7tADlbcMjj2oAUfeNZvcBWzuJPK0gE34+6DitFsA
        vJ5pgPH+qf60AI4JbigBuDnFZvcBN7jhTxSAXDSfe6igBN23kEkntQBYhhRoXJOx87cCgBHEm3ORgcbu
        /HFADFyVySW9zQAux1G/cNp6DNAB5h9KAEHDlu5oEOaTzB9KAGq28ZPWgZJhii4PFAEqEk7TQISSFi5w
        eKBiqGiAzyD2oAawAY7RgUARP940ARtnNAAfuigBq5xWi2AXn1pgHPqKADn1oAOfUUAMbrn9aAImOSeA
        B/eFBa2G8Do273NBRG3LGgBI+JGzxQAx3IY0AOjyTnFABICXOKAADgIeN3JoAUHPIJY9MdqAHrJtbbja
        /pQBI7Ejk5NADF6UASoyBRkc0ANcgscdKAIX+8aAEoAN5UYxgH+IUANaPyzhTuHrQAwfeoASYg5x971o
        Ag3lOJOfSgA+788nJPSgCMlmYluR6UAIAsvCjBWgA3buv3+5oATJj6nk9aADGOBzQArdFoAnRhtHIoAa
        wcsSGG3tzQAZG5eaAFifBxQBYBLDNAD1lRRhhk0AL5oPQcUAGd3NABsJGUcrIeh9qADcrcrnHv60AMbO
        aADBoAieQqxFAAG3DNABQWnoRvEzMSOlA7jY1KuwPWgLkq8CgdxjY3HnJ/unpQFyJxg7iApPYUCuIsxX
        J5TPcDrQO4qZ+bI2+1AXJITE0EysP3v8BoC5AkmGy2W/2ccUCuW0YOoKrtB7UDuRTd6AuRKCBz930oFc
        PMxxH8uOuaAuG4NyOlA7igPvTB4oFcTBGc9c0DuLtwNwoC4f63rxj1oC4hbLRv1K8UBcEYrIwRjnqQel
        Bm9yUETDkBMdqBD1m8pQ3dqAHlyEDDnd6UARKNpIzQA1chufu+lACuGZwU+72oAmYSAAE/rQAxZCox1N
        ADwd31oAF6tQA6GTgxdA3U0ASRsm0ZHNADiGPK8LQAcjqeaAJEjLKCTlfSgBJNoGF6UAVpORQBVZF3E7
        d5PXPagBF2qWAOR70AJwU++R7CgBBwO5+tADGXaS3rQWthMu/IoKuPUqBhhlu9AXGtIFbOP3f8Q9aBXH
        KTgZ4J6UDuLketAXAMfuDo3NBmxd2/G4mPsPegRIobH3MnuD2oAQFI3yXZg1AEjpGR+7/WgCAoQfLPO7
        k0ASefsjAH3jxVJ2LWxEpO7k5NPmQ9CyhGAKl6kPcZIqeYCw5pCEnwCQOlAEKAlvl4Pc0AOMgEh2jigC
        wjZUZ4NAA/QUANcqCXIyV4oASThF/u9cUAPjIKjb0oAaw8xj6LQA+JgwPGGoAaoZWy54oAkODyPu0AN+
        bs3H1oAs+ai8EZNAEisGUEcCgCaIZ+T+9zQA2OLzmP8As0AOZ33eWPlVu9ZvczYGUbAWclBw/vSEOjkY
        IMkle1ADvNY/d4XtQIUFiMk80DE80A4H3vWgCRJDtGeTQA7tuIAB/i70AJ5uehLe5oARTl80AOf7xoAE
        wCd3IPSgBoBA560AIJMOR6UAPYc7/WgBN27mgCNm3MV9KADaV4BoARXcFgDxQIYxkZc5oAWLdsGTWi2G
        NeUqxFMADbuaAI2kxMooAiJySfeg0Ww6MEn5OCPvUDElaPeeKAImyWO3haABsbMfx+tAEWCPvcmgB652
        igBdoPViPpQA8fcXBz70APZdvzUAN3buaAHAKu1mGQaAJxJE75A4oM3uOJBPHSgQ3btYtQArTc0AKfub
        /WgBqOjKCRzQA1yCxx0oNFsRM25itAxpXAzHw6dTQAxgQf1oAcvSgBrZzQA5elAEqK5UYPFAAAQ5z1oM
        3uTYRRuI5NAgDK3JHB6UAIZCnB60AMZtzZoEPT7ooGL5hU88r6UARs8bHOKAJAQYxjpQAifdFACmQrxQ
        A9CWUGgB3PrQBEf9aaAJU71m9wEGcUgF5rRbAHNMA5oAFk2lhmgBI2yGk/u8Vm9wJYYiVJYAIec96QEb
        uEGFJKjoTQAiksuaAGtJtYCgCZ1M20LwaBD5raW3RXZsg0DIWfy2IA3+oPagBqy/NwSfc0AOaZM8jJoA
        TzQenAoAepyoNAE0XQ0AAiZhkHigA3GP5T1FAB5tAAqvK5AOBQA5kMZ2nkigCvJneaAFXpQBDNJtyK0W
        wBESyA0wCTpQARZ2CgAk6UAMGBGDkk/3aAGfUbfYUGi2BtioGI5oGRZMhynGaAI2DhiGOW70AOXpQAu1
        z0PFADGaRSRmgBAjONzcg0AOI+VQnFAEjFQcOMydzQA2gB6zIigHrQA7cG5HSgAoAjf7xoASgBRHu5oA
        MbehJPoaAGT5wuRt9hQBE8e5c0ARMNq4oAT/AJZigCI89Ts9CO9AARIeRhR6CgA+bGGAH+1QAmYx1yx9
        TQA5CDnHSgAP+roAaGQDkc0AOTB3Y6UANFAD45MHFAE3m0AKDuGaAJFztFAEijKjJ2ehHegBfMI4xj2B
        oAGO4KaAGyZ3GgBhnMZ2+tACSQ4FAFctsOKAE8yg0S0DzKB2IzMDIQPvUBYVpGzz1oAUnKZoCwnCxjdy
        O1AWEiEmDzQAByowetABnPNAWDzjnZ6UBYVndVAB4oAZ5xKqp7UASMu35qAsQ70aQkjmgLEvmxjjbQAm
        4NyOBQFhx+5QFhofAxQAu/fxQFhQu2RBQFhvr9aDNhQIKALEZMcYY/dbtQA4RAv8vAoAiuQFYgfe9aAG
        RMUAJ5NAD5JTJh/7vFADmUIcD73WgBgcq5B60ATA7hmgBcZIT+/zQA0S4c+3FAEwJYZoAOaAHrJgYJ2Y
        6Ed6AHAGXqMe1ADJE8v5fSgCJo9yZoAryRcUARqmxc0AOLbo80ARt92g0S0GrnaKBi80AIy+ZgH+GgLE
        qOm9DIM8cUARkqCcjmgByhioKnC9qDN7gflYeZznpQIsOsmBk5XtQA2OVF3AjmgBisGLEdKAGigC/p2m
        x3rBpJjEFBIAGc1k3qWloU7lFjkJU/LnA4xU3ZVhrTE9QAP7wrVbGb3GtLwuDuHqaoQ/bv59aAEI2nFA
        ByR0wP71ACcdiW9zQBIkvGz0oAmThRQBBL/rDQAxZfKJ96ALEP8AqxQA+gCKXqMHJ/u0AK5dhtwFHoKA
        GhSigHrQB//Z
</value>
  </data>
  <data name="设备维护ToolStripMenuItem.BackgroundImage" type="System.Drawing.Bitmap, System.Drawing" mimetype="application/x-microsoft.net.object.bytearray.base64">
    <value>
        /9j/4AAQSkZJRgABAQEASABIAAD/4QAwRXhpZgAATU0AKgAAAAgAAQExAAIAAAAOAAAAGgAAAAB3d3cu
        bWVpdHUuY29tAP/bAEMAAwICAwICAwMDAwQDAwQFCAUFBAQFCgcHBggMCgwMCwoLCw0OEhANDhEOCwsQ
        FhARExQVFRUMDxcYFhQYEhQVFP/bAEMBAwQEBQQFCQUFCRQNCw0UFBQUFBQUFBQUFBQUFBQUFBQUFBQU
        FBQUFBQUFBQUFBQUFBQUFBQUFBQUFBQUFBQUFP/AABEIAH8GpAMBEQACEQEDEQH/xAAfAAABBQEBAQEB
        AQAAAAAAAAAAAQIDBAUGBwgJCgv/xAC1EAACAQMDAgQDBQUEBAAAAX0BAgMABBEFEiExQQYTUWEHInEU
        MoGRoQgjQrHBFVLR8CQzYnKCCQoWFxgZGiUmJygpKjQ1Njc4OTpDREVGR0hJSlNUVVZXWFlaY2RlZmdo
        aWpzdHV2d3h5eoOEhYaHiImKkpOUlZaXmJmaoqOkpaanqKmqsrO0tba3uLm6wsPExcbHyMnK0tPU1dbX
        2Nna4eLj5OXm5+jp6vHy8/T19vf4+fr/xAAfAQADAQEBAQEBAQEBAAAAAAAAAQIDBAUGBwgJCgv/xAC1
        EQACAQIEBAMEBwUEBAABAncAAQIDEQQFITEGEkFRB2FxEyIygQgUQpGhscEJIzNS8BVictEKFiQ04SXx
        FxgZGiYnKCkqNTY3ODk6Q0RFRkdISUpTVFVWV1hZWmNkZWZnaGlqc3R1dnd4eXqCg4SFhoeIiYqSk5SV
        lpeYmZqio6Slpqeoqaqys7S1tre4ubrCw8TFxsfIycrS09TV1tfY2dri4+Tl5ufo6ery8/T19vf4+fr/
        2gAMAwEAAhEDEQA/AOCr+kD+W3uOjJQ8c564oETgBeM0APTrQBIchgSflqWA9pAJTjgUrgDHcc0XAkiY
        gFOgbnNFwHwuGUnPtRcze4wyFTyfl9KLkkisCoPQH1rN7gOyKQCFQo3MMg9KAAeYwzmgAUHec8n2oAk3
        kUAAOWzQBLQAUARs5DEUAJv28/3qAGP+6bjvQAnC8Zq09DRbEEv+sNVcoQ/couA0dKLgIe9UgIBTAjZf
        mJHJ9qDRbETHLZoGRsMk4B3etACYYdTzQBGzKhyRknuKDRbBtb+A/LQMTcSdpPNABjZxQAinMmKDN7ku
        SflPGKBC4VeMZNAB9OB6UAIWI4oGPjOTmgQ9iC3H3vWgBvI6nmgBjHYcjvQA4qVVcnK+lABJyxK8CgBn
        PUnK0APQMT8pwvYUASSMyDawOaAFjyUBxQZvcawO48UCHLjaMnZ6Y70ANdZCxwAo9BQA5RJtHP60AO57
        8mgBDL5XTnNAC5duAeKADaV4PNBotgoGSKH28HA+tBm9yMuyyEHn3oEKxy1AD4+AaAEGB3yf7poAXzCP
        4QPpQBIpZlBzigBrA55oAcudoxQArx7gp60AKxKHFQ2AgJPNF0AcD74yO1FwBDgsCeaLgCHJZTRcB0Q2
        8UXAex+ai4EbsYjk/dai4DiFULtP/ATRcB2fn5AX2FFwFY/MaLgJzRcAAPflfSi4CZHbgUXAUR55ouAY
        VfvDIouAb1Y7V4Wi4DJQ0fCnr2ouBCYSOvWqQBjbxTAjf71ACFypxzxQBGzoTluTQA3I7cCgBjZ3ZPK0
        Gi2ADP3RxQMORQaLYY33jQMYOJlPagB3c/WgBMj1oAPvfICN78qfSgBA8Zc8cjg0Gb3HtjPAwO1AhPlH
        BHP0oAD7IMe9ACfUY9qAEMm04oAazbjkDBoNFsOXcANxyKBjmIK8dKBkNAgoAGxhcfeoGMkzuOetBa2G
        0FBucdDgUAAkPfk0ASIdy5oM3uOxj5qCR0au53ADB9aAJwGUYOM+1AEbybWyf9WPvD1oAXzTtXJzQMmU
        7m29n5oMnuHmYkNAhWbc2aACgB4d1UYOBQA4Enk9aAFyoHKA+5oAaknzts+X1oASRg4yOlAEROQq0AOI
        2nGc0AAbd8vagBzRAKP5UAMXCjFADGDFjg8UAIXK8HrQMepdhw34ZoEOG4/KfzoAVhtTFAEbh9vBwKAG
        KxAweTQMRpRuGWI9qBFgyZQYyw9aAEViyhSu0evegA2heAdw9TQAxs5NACFdvzUAAYsM0APWQIMPyO1A
        BuJPJ5oAXG35u9AEbSnccDf7HtQA5X2qCDndQMXAXigRJGUB5HNADjgyHHSgB6vufb/doAXd50hzwRQA
        9iWAJOVqWzN7kwkAHyjildCFyG6D5vWi4Bgjr1ouAc9MAD170XARYRI+N2fc0XAdLJ9iG0c/Slc0WxSk
        fzHLetFxip+9G3ptq0A1wAxNMBvm0DI2bLE0ASbyLdhjNAhPPcgKZGRB0296AJVkkAHOE9KAFDhhnIoA
        B97pgf3hQBMsPmqcSnA9aAItsmzAbNAEbKXXDHlaAGJLzwMN60Gb3HGRs85JoEBbueM+tBothjABiR9+
        gZCxySZOc9KAD5h1PNACFiOKBhknvQIXn1oAOaADPuKADbv4NAEbIY2x1Wg0WwMAF3AfhQUJGS2TigQ+
        POwUAOjTLsaBkchdXIU8UCGrMxfa1AyUPt4oAXO7vQZvcQhh3xQSPjQucH+GgCVZCX2f3qAHlt5z+FAC
        Yc/dPFADy7KqgcMPvVDYEpkWQKqjBpXAWQPFt+br70XAlCbBnOTRcBM7uadzN7mYv3qsHuTJ+6dnHVqB
        CD75oAsJOm0Jj5h3oAdt38H+GpYDo8SHBOKQD2AjYrkcUAIHI7lh/doAUnPO3b7UWM3uOjKA/OM+lArD
        2w7EE/drN7gOhuFBOUB96QDvNJOcfJ6CgCRWDLkcD0NACqMZZTg96AEDbhkcD3oAXmgLCc55OR6UBYN+
        PuggUANeQ46GgLDVOVFAWDIoAYy+Yx9BWi2NFsRMdzZpjG0AGaAGv0qkBDTAjclT8o25+8woNFsRyKBj
        bll9aBiNjPLke1AEEx2cg7s0DGbdsYFBa2EU+Wuf71BQMAAAB81Ah2VH3hlu5oAQLhtwXC+o60Gb3JQS
        wyCW9zQITa4+ZTQAAlmy3WgBWfBoGAJIzQIMGgA5oAMGgAIIGe1ACbi3y0AGzPy5Hy0AODB9qj7x5zQB
        JPdtMFD8dt1ADQzjAViR2oM3uSxSHBzyaBAOm7oTQAu7dzQAUAFAEbcsaAHrwozxQAu7dx2oNFsSQeWk
        o3jPHFAxjfeP1oM3uNeXIVADkd6BChmWdQeeOtAEitkZPrQAx+tAD0+6KAFoAerZG2gBcbeARQAm/BxQ
        AuSec1LAXn1pAB+7QAioGAwPmoAXay8E5NABg0AJyMv3TigAA2HlfMz0B/hoAkSP5QSxb3oAOAcZoAXj
        oB81ABIzJGoIOfWgBY23ZNADc/u3HfNADXZw3ynigBVJI+brQA2XnHAA/vCgAK7fm7f3u9AETSOTlWyP
        U1SAASRlutMCNo2clgeB70AIXaRAQcN/FQBE/RdqZHrQA2TO48Y9qAEZSE3UGi2GiZljBTgtQMFDBRuI
        JoNVsNbk0ANyW+XFAC7dvFAEblAxyOfpQA3g9BxQAgxuOB83rQQyUOU4f5vTFBIu2T7+aADJPLdaADbv
        /CgYoZSMkEn6UADY28cCgtbENAwzQMliXeDnjFAFeTezkg4FACb2UYPPvQAhOefWg0WwZHrQMAd3y0AM
        c7GIHSgByT7FB9aDNkqtkbaBAJNrmPsKAJkk2ZHFADSSQpJ+WgBeN+RwKAJuce1Bm9wGT0OaBD1KbcEf
        P60AO24G6gQEgplxkHpQAsfCDJ5oAJGyNvagCNFKnnlKAHl+flBxQAmc80ARudhz60DHq2xQKAF3l/lH
        D/wn0oAYy4Jx0HWgQikoSe9AyJyZMNg0CJB90cAD+9QMN4HAkY/hQIN57ZPvQMYwYsSeV9KAHryvy8Cg
        BrFQfmGT64oECOwb5OF7UAPZ2J5yTQMTDnkUALhu9AEbLJuPPy+lACFypxigA8w+lADo2BPAw3rQBIwY
        HnrQITkZbqV7UDDaR/OgQYNADjIVVR6UALkM+SxFADml8s4HIP8AEOtADkGVwp3Ofut6UASoRtGKlmb3
        JFkwMZpWESrNhR/jRYBfN/zmiwA/Cq/rQA+Rw8Q4AP8AeoAqsMLyd3uaLGi2IelFhgkmCRVICInJyeKY
        BQAxuCecUAOEpWMN1K8UACy4AoGOLZSgQsRThCPvcmgB7Sjdx06UDHrKcCgQ5X2kt/eoGMcbV9qBEaZ3
        HJ+X0oM2OaUZ+U/LQIBKrcEbyPXt9KDRbEbyfxAfK38XegZGyEE4JYepoAa3IHegBxzmgBvmKvBUk0AL
        ndyOBQAc0AMdlQkkEmgByt5ihhwD2NAxeaC1sMfrzQMRZCpIoGNBDdWIPoKAJUPyjBz9aAGt1NACYoEN
        H+soAUkpITQQ9yQPvG5wSD0oESRyFAQetAgVgw4+9QAu9l4PJoAesm1Q3egBWfeoapYEueBkAD+93pWA
        UYHQ59zRYBC+3iiwEqTHaKDN7lVEDQrj73rVmgiAocE80ATAg96hsBTjoB81K4Eibtozgmi4Ei7FGSPm
        ouBHvR5CNpxTuZvcerhXIXoKLiHO27BouAM2w5Hei4CbdpxWb3AlQoFGRz9KQEiyYUbRxQA5SWLGgBFH
        GMc0APJ+VaAGySbW9qAE83jgYb1oAPNbvyaADzT6UAKDu5oAil9e1ACvJhcVonoBEDl0NO4DfX60XAYx
        56ii6ATJ9RRdAMkPbPT56LoCJuVz3PNUjRbEe91DAHApjIVLEcnmg0WwZPqKChkkpUFupT0oAYpyM+vN
        Ahc0AGaAJF+6OaCGGSnI53UEi4K8ZoAOaACT7i0AIOnWgCX/AJZCgCPk9DQAmH7GgBdrfdb7rUAGQ33e
        BQAZXuMmgA69OlACpEJC2e1ABEcfP/c4oAmXAbrQA9iM9ahsCFw5fIPFK4E3O9MnJxVoBP4KYCLjHH3q
        AF6ff5oAPl/hGB6VDYBmlcBF+9VoBzdaYDS5XigBc55PegB6ncAlQ2A4DHGc0rgFFwCi4BTuZvcDg8Af
        NRcQYI+91ouA9XIGKVwFBJ5zTugDPuKLoBBIVcii6AcxLHNF0A0yFUce9FwHctg+1F0ANIQuOtFwGIOd
        /rRcCbzsjj71FwFJbblm3Z/houARsOeAvtRcBjkFePvetFwGoG2jJyaLoBeaLoA59qLlrYCfl60rlEVF
        wBiNvWi4ESckr2bnNWtgIjkk0wDIY7SxFACyLiNQDketAEchMYyT8rdqAGgjG0DC0ANddo2ig0WwxZCq
        4oKF800AHztyDQIjbO45OTQAm7ZyOd1AwAxwOaBEqZCigBABv+8R7UAObuc5HrQANwtADVcqoFAxd2eS
        etADHKBjkc0CGBFZ8jgUGi2HurY+Vhj60FEGD360CHH7lAyE5GXPRegoAMf3elAB5pj6c59KAE3bvl7U
        AATaxFACl9shGKAHg7qAF60CLEJTyxkZNAxxAc8cAdKBCA55ySfQ0EPclVig6YLdhQIXBXigQ9ZCoxQM
        XOeckn+7QZPcMbzggLjtQIUshQZHNQ2aLYaMY46UXGLvIGE4PeqQDWkyeAcUxiEkqPWgQ1cgUDHLn5vS
        gQ1ZNvbKD7w9aBi5Y8n9aAGmYx7sc59KAI1H7oUCJIs7BQA1pCGIoGJ5jH7vBHWgRIrblBHH1oGMbIbJ
        Py0CDg9OlADS0gPy9KAF81h160DHqQyglyPYUCEkDkcfd/vd6AI0BDcksfU0APzhm5oAarCMZbkHpQMU
        SsevWgB6zfKOzetACMJCc5oEJtkzjPNAD1wFG8ZNBDDPocCgkI/vtQBIkvlg470DJEICiobEAkw+O1K4
        E4ZCMkc0XAkUjHGAKLgSJtYYcg+gouAFfL+UkGi4DGQE5ouAx0QDnrRcBv2ePygy4DGi4FeUEEA8mi4A
        IWkZucAetWtgImK7cMMt3pgJkeWMcCg0Ww0sCqqy4H96gY8qAcIdw7UGb3GlX7UCH7yqqD1FADxN8zUA
        OQnaCxwD2oAcWycfwfwj0oAZhVZhIcMO696hsBCQU4G32pXAiOB98ZHarQD0B2jPJpgOJLKFXjHWgCIr
        t6cL70ARvIQx70DHIxZQc0CHc+tABz60AGT6ig0WwZPqKCiN5CrEUANYlsEnK+lADjjPHAoLWw3ekb5I
        5PWgoUgCT5elAgflX/CgYebjgUGb3DcG6feoEIpO/k5NAhzOQfagY5WXaNw5oM3uL8p+6MGgkfHkH5ut
        AD2G9jz0oAkhZCCrfx9ahvUBmQzDHSlcCRv9aaLgDdaLgOWQqMUXAqxvhQMVoA7OeaAJE5X7oA/vDrUs
        B8blTjduSlYBxJaQlThfSiwEo3Y55NFgAuRxRYzZIrptCIDvf75oEBIzx0oATqwxz9KAHy/Jh153elZv
        cB4bI29KQBu2cA0AOjl5oAkaUkkDlz90+lACBg3170AShoxH84z6UARbtx20ALt28UAFACZHrQA0kDJP
        3B973oArj3NaLYBd+KegDHJJz0+tAEcnTmgBifdoAY4wS360ARyS8cAhvXFUjRbEOWIyTzTGNOfm+lBo
        tiMf6sUDGLwTQAg4HNABQAUAPVsgL2oIZKo2jGRQIVugoEOOc0ANwep5WgBcp6GgBMd/4PSgBev3eBQA
        c0AJksdvpQMAu1iKBDmyCX7r0oGJgigBV6tQIYA3Y0DHYYdaAHr0qWIkVSIWbqM9KVgHFg+COmKpAFMA
        oAOO3DUARssm48/rUNAJgjr1osBIn3RVIA8wjimMGJIBNAhxHmEj+7QAm4gZH32+6fSpYEigKoxxSsA5
        vuUWAarlVApWQC7s8mmZvcepG3A+9QIac555NAAzkLjBoAapyOeKAAkHp96gCRQVUMTzQAoYtzQAj9Fz
        QA55NoC9/SgBqtkZzigBc+4oAM/7QoAM+4oAMr35NABu3EqBwKAJYl2KR29aAIznJ5oAjbrRY0WwmaLD
        HRlQfm5FFgGzorsSg4NKyAhUbRirQC5pgNH3moAjR2V+fu+lACTsrAEj5T92gBnzDqeaBjOSsoH+sONp
        9KC1sRM2Tj0oGSIuFwKAI3OxsjndQMjdSGwpwe9ADt3yrtUEUALuCPkABm9KAJfMK/IT0oAXHHtQIQEZ
        yfuD7w9aAD7v3xkdqADJPymgYxk3MV/u0ANznmgBx27BkZP0oLWxAcZ46UFCNIRgCgBxO45oAjbOetAC
        ElOf71AAVxwTs9CO9ABz6BfagAw56HigA5HU80AGCfu8HvQA9SNu8D7vAFAEivtGM+9ACq+98UASs2wB
        R2oM2DTFWBAzn0oETmgBo++aBEvWgh7iZHrQSGR6ipZotgyPWkUMkfBA61SADvY5HSmAnmbeP4/WgBfM
        bv1oAdGxY4P3aACQKHITrQBE4OOeTQIWLOwUDHc+1AEb70bKn71ACbtny/xetACKSXy3WgBx60BYKAsF
        AWEzQAqoCWNAhANoxQBKgO3gcUDGN940AJuTHIyR1NAhPlk6dB0oGG7dQAb9vDAkdqBEiFioyRmgYx3M
        ZMndeKAGvOWCg0Gb3FK7zj+7QIPmYfKCD3oAkXkfLwKAF59qloQ9elKwEqPhQKVkAvmU7ASwKrNudQF9
        e9FgJ32hj5ZyvbNFgCJBPKkZIAPNFgI5YsyN9cUWAhkTcMH+H1osBANxYsfu9qLAMnWaNgWOQapAAGC2
        KYEe7cQtBqtiWRccDnFAEaSbJE9PWgh7jlIZmO4igQigkcHIoAB940CJRwCQA/rn+GgA74BLUAOQYz2q
        WAwc0rAMYHcSeVqkMQuw+7wvamIepJHzdaAEcBxjOSv8JoAjbLLyu0+goAavCjNAEgBCg9BQMa3Unt60
        AJQWtgoKI3+8aAHLjaMfeoAY7lWIJ5oLWwgZD1GTQUSeaojABGPSgBi5lLbTt29Se9ADVYOMgcUGbHj7
        poERxA+lAEpdlZc/doAkfEzZHCjpQZvcaJGI6ZoESJkqD0oELg0DHr0qGhC7yBjbgf3hRYCRDlepPuaL
        ALtc9OlFgJFwFAYfN3osBW2bBx98/dNDYBuD8ilcCRTsUEc560XAs2tnJPkxgYXkk96LgQyKROwxz6Ci
        4EyN8o5FFwBz0ouAvm+U/HOaLgOOc0XAfkrGNhwT96i4DURlPy8CoZm9xzZzz1pCEoNFsLtwN1Ax6udo
        ZOD3oM3uO3B/nA60CE8wn1oAQbmbI4PrQBMAwHzHLetAC0ARvHuYmgCOQFRz930oAYDHj7v6UALgP04A
        6ZoAYx+YlwSO1WnoWtiJtwOWORTuUBYIuV6N2ouBEyOFCA8NzRcCJiSnJ56UXAiPJ2f3uaLgGSatbGi2
        GSnA54pjGKSBwN/qD2oAYTHnu3vQAhIHI4FABz1J+WgCVGj2jigBBjfxwKAJhnFQ2ZvcOfalcQc+1FwH
        qoIyTRcBrDBwKLgJyPSi4BzTuaLYSP77UXGO5qkBE8hVsUxjXkOBwaAJgSwBoANuPm71DYgBLc0XQx69
        KLmT3FMjQ8n7rUriDzMcAcUXAkVsqDRcBeF5yPzouApbcgNFwISrk8Hii4Ccj7x5ouAuHP3TxRdASJwo
        B+/3NFwHMTtGTzRcBq9KLgLh+xwKLgOj3A/Mcii4EhIJ+XpRcBKLgHQUXAKLgNAbecHii4DmHPzMQaLg
        HHrn60XAKLgFFwJFPyjpRcBeR0Af1z2ouAm6PG1eZv4WNFwGN1ouAN92i4DIygPI5ouBMHjPy7ePpRcB
        cbeF6UXAcmSfl4Pei4D5ZcqFAOKLgRsCDii4CMRtxkZouBFuQdRzRcAUjLEdKLgCEbDzRcCsw5NFwE2Z
        GaLgK2AmM0XAE+4QD85+6fSi4ERCyJgcMtWjRbEeSfvdaYxN3l8+tAxRsXgjJoEIcH7nHrQaLYjYjccd
        KCiNxyeOKAG0CJFGF6UALQMerlQM8rQZvcdvVhlRg0Eh8w+8cigAyO3AoAY5Bbjr60Gi2G4P3Sfvck0F
        CkuU3g42cAUARFSpwevWgBOO33vWgBUyCQTzQAxulADFzjrQAEN68UAOPC4PWgBq52jFAC7M0AGCOKAE
        L7TigCRMsoNAAHKuRQBOhySTxmgBYHKEjGKBDhId54qWyGTId2TSuSSQ8KaLgRknJwgPvRcYZb+4tFwD
        n2B9KLgBYjilcAyT3p3ATPuKLoBeT3FF0AZI64qkBG7kMRTAepJUHigBjSEMcUAJndzQWtiN1fccHAoG
        N3leDyaAJUbKigY7KDqOalsAYjbxwKVwIlcqWGKpCEHIzimAb8Hy+zUEMkWTzFwBhulBIFpYeN2VNBot
        hjA7jn7vpQMesaOoVvkRuRjv9aCGNcgsdq7R0xQSN4PT73egB0crZ2HnHegZIetAgoAjdjGxIG/d1B7U
        DFjfYcA7h60APaUk0AJ5xTnB+agBdrn7p4oEOR2RsHrQMmSUnNQ2Iem0LuI+Y0rgTIwZQRx7UXM3uKp5
        ai4hFTA3daLgL5jehouApHmrz1ouBWngdAFU/K3JouBA0zZ+c8dMUXNFsG/zeI+AOtFxjJSIyCvT2q0M
        QybvnJKe47/WmIVbpXUiRevQCgBiymFR15oGOWSSMnaeDQIQSKgwwy1AyRZRgED92PvD1oAUOVfcf8ig
        BWmZiSfumob1ATLPzGdo75OKVwF/HFO4EbqXYg9qLgNEp3dKpATbtw5AA/vd6YgHThtw9TQBG/zsQT92
        gYhnYrg/dFACNKqxrj/Vj7woERtIc80Gi2DOaBhkUDE8zHFADGO45oAcreWo96AGnYshBGTQArctn+Ds
        KAHQ4y2BgUAKcZoAkQ/KKAF3bjtoAY8hUbOwoM3uLG5VAKBDvnPIOAaBEiBsc8mgYvmEHHWobMnuPWU7
        RxSuIXzT6UXAeJHxxxRcBwyRk9aLgVd+09ST/d7U2BIrFhkgKfSiwEkKNIxTcArUWAmVpI1KI5G3riiw
        CIkkieahIK9c0tAHYjXjHz9zRoAg+/RoArYzx96jQB6ZC4JGaNAAOQ5FGgEu7PJqGZvcUSIvBGTSEJuD
        HjjPag0Ww5O9AxooM3uHmmLp3oEWIj+7FACONzbOzc0AOU/KO3agBjvhiKAHo2UBNAEMnMhxz9KAEMio
        uCDmgBqspGT0PQelADZCYxk8k1aWhotiHG3iqsMjd9rH+dFgImk+Y8UWAjYknNFgE8vdzRYBjI4Y4PFU
        jRbCSFVRfNGT2pjGdjQBGn3KAEkBAy/Kn7ooAI/uCgBVch+lAybOevFAiRTx1FSyGOXq1KxIig4osAuD
        RYBOaLAG3fx6UWATdnnIFFjRbDRIQzd6LDFjYlRVIY1x5jY/u0wHq2VB/nQAufcUAMYOWODxUsQq5AGS
        M0rDJE60WM3uPYb2I9KLEiZ3c0WAKLAGU7jJosAJIASB0osAnznnOPalZAKEJGWPNOwAVdehwO2aVkBI
        mdoz1p2AY4wc0WAev3RRYBc0WAOlFgJE+6KLALmiwCNj5cEk/wB3tRYBxPPIC+wosA0lTwPvUWAXkdTz
        RYCNvvGiwDo+hosAq9KLAKSB1OKLAJ5p+72FFgFA4osAuD6UtACjQBo+/TsBKOnaiwC5+lLQBN+KNAAs
        78A4A6Zo0AA7Nyx5o0AAiF8sOaNAHuseKNAIWAC/KOKdgIaLAK33aLARt9yiwEWDRYBOfaiwCP2qkaLY
        R/vGmMa8Q8l2zye1ADFPzflQAS80Gi2ICOaCg3OOuStACArvJYHB6CgCwMiFsnmgBH+9+AoARvu0GbGr
        0oFYlT7tADG5Y0BYSgtbB1R+9BRJt2gMaAGMvmHd60ARMMMRQA0rghqAElfDlh/FQA1RtJFACAgD5+R2
        oAUYX5n+b2oANwbleF96AEU5c85oAc2dx5oATco4KBj60APDvj5flHpQAvONxOTQAAk8seD90UASLIY1
        xKd3pQBKkr7R8ob3qWZsXMjc/d9qVhWHrnAyRmiwCmTbxmiwWD/bzzRYLB1G/uaLAAYtznmiwDW+8aBC
        Ept5HNAxYyNgxwPSiwA3BJYZHaqQDee55pgHGeuT/dNAB9QF9hQFhWXC7hzmg0WxDndzQMQH5zQAuR5h
        5oAeeq1LAc2BKS3IPSlYBkmd5ycmqQDfMKnnlfSmAxgCS6jr2oM2OWXKigQKcsTQaLYUn94aBko6UGbG
        P940CsNzn7pAPfmgAypxzsHbHegAdX+Xjb7UAKXK8HrQMUshTkc0CGrjHHSgA+Ynhhj60AG8rwTzQBIs
        jFRs60AClwxeQ528UASAKG4YgVLESiULwDn3pWAkSQg5wcUWIe49jk5osSKjuDwePrRYB5lOeTk0WAaJ
        Tv8AeloAjl5ZDGDw1GgFeS1Z5D8pY+wzT0NFsQOphbAHWixQEbUxVgID5cY96AECeWuc0AMZtzZoATzN
        vFACiZe/JoAes3Ax0oAXzTQAnmnNS0AecvcEmlYBdjSfMg3A9m7UWEI7mMBd27HeiwDi27mqQwpgIXKj
        2HegBQykZK5P0oAjfG44HFAWInHzGgLC7gyqoGD60FrYR1KsQTk0FDelABkpyOc0AGADjfg+goAYw54O
        R6mgBOfUUAPVyBigBTLj/wDXQAZ3c0ASJ90UACviZRQA4nJJoM2PUjaOaBC5X+LkdqAFSQxE9yfSgByA
        7MD75+6fSpZk9xrPhsAUrCFSXBosBPndzRYCRDGF+Z2B9BRYCvyB6UXRsI3IXvRcRIv3qLgSB3D8HApX
        AfJLIg65zUPcBiuyjB60hkyHctBk9xc0CBerUAORtiA0AODmQbvWgB6njrQAv3B5meVoAM559eaADNAC
        g7vloAN2zj+tBm9x0bZOaBBI+HOOaAG8nnFACkEJk/d9KDRbDRIoGEGDQMMnq3X1oAYz88cigZG+9hkH
        FWnoIhwR1607gKRldn96i4EbHKUXAhOadzRbCHd2P60rooBn1FO6AbMCVHei4iJ5NoxVIY1UVwGZiE/i
        HrTEHT5c5HY0AKRhcDnHpQAxA+eDgUATiPPJPNAxFXD1LETDOKVxj16UXENZiDSuMTJPencAwaLoBkm0
        dRk0XELH9wY4FFxjTzKnfii4hAOKLgLJ/q1ouA1ui0XAlXOOtFxkcoJI70XESDOBRcYuCaLoB69KLiGt
        nNFxjl+6M0XMnuKyjarKPmpXEDEnlutFwA8gY5+lFwF2PIxCYf1B/houAqKIzjdu96LgSMcHLnK9hRcB
        KLgHydxk/Si4CsVC8jj+EelFwGElFXPJNFwHkYOKLgPU/KKLgMb7xouAmMc0XAM7uaLgFFwCi4D1AVQ2
        aLgMkZWwSMmi4EgIwMdKLgBl28UXAmjZGQ7iQe4qGBCJMDC8rSAUHdzVp6AC8FqdwBRxUMCxEkckRDtg
        jtSAjAEnAOQvTNAAE3NuPFADnGBigCLBx0oATDnoePrVp6AREESHPWncBW60XAif7xouAH7lO5otiJRv
        LZ4xRcYiksM0XGLzRdAMbrzRcRE/3qLgO6Rii5otiPNFyg2Pjcp4qkBG5LMS3WmA7+BaAJweKAGN941L
        AbSuAE+XyP4qLgLt2j2ouAE5UUXAYmS2FOGouA9g6n94c0XATcDwOBRcBjLhiBRcBNgPfn60XAiYbZCK
        pAEnJFMCN8iUlj8tAD0RXbK96AGyqVc5+7QWthpCjlRg0FC5JGW60Gb3EOOww3rQIeGZRg9aAFDZ7igC
        VQdtAAmA2WGRQBP5ihV2DC+lSwJCd3NK4DR9+i4hwG9mz2ouMauWGVGD3ouApRwdwOF9KLgGdw4HzUrm
        b3FwR1607kj1zt60XRothjjad1FyholbqeV9KLgIJowx4ouAsjBiCOlFwHNytFwImfC43EewqkBCZMHu
        aYBnPNABQAedj5DwKAHq+wY6UAOzmpYDGGGyOppXAbkvyvB71SEIWXPBApjFEmOBz+NAATnmgB6vhRUs
        BrHJzSuAmUH3hz9KpAICCxI4ApgSiTzfmPU0ALvI4oEG7PNAw57/AHaBDHABLCgY3O4ZoAer4AFAEkbD
        OW5B6UCHs7Kx3HK1DZD3EjxK7EDAHrRcksJcF4gh6LRcYqOZAAaLoBSu3ii4h4+4tFwLKoIozM3PZRWb
        3AjRhbLyCWbk0gF+0yI6NACGA5pdQKs27zGyeTya6IjIZI3YZ4UH+LNJvUtbDFG0Y3bj6mlcoSTkHvjr
        VIRASU5xTAQMZBu9aBksSAg5OCaAEChhjP3aABWyxNADmPO/+7wKDN7joxhv1oEPeQqu4c7OKlsBEK7R
        uHJ56UriAorHI4HpRc0WxG7bGIouUKsh8pkJ+VjnFFwHmfP3enSlcAB3c07gRuRuNFwImVyxKnii4AmR
        kHrRcBCN6YJ6VSAPOKRjHU0wI8bfmz1oATzC/B4oAGG0ADmgAw5k4PFAEuVHDjLd6AGMGYkpnbQA5HKq
        AeT9aAJIzuOaAHnk8c/SgCJ+WNAD1I2jHDUAPQmMgk5JoAez7DgGobM3uHmmlckRTl807gS4Y9OlK6GP
        WQouCefrTugICCDy24UWEPQjPHAoAmoADyq4oAl6AVm9wCkAj5YLsOCOtBDHFgxwOlBI9QFXFAEiqCM5
        oAdgjigBo+8aAJCVDDdyKAHvtZ/kHHpQAgTcM0AB/dfjQAjxDA5oM2KRg49KBBlO5INAEiIZFwh/E0AJ
        JG0a7W5IoNFsQHNAwbOzk5WgBqkY44HpQA1utWrWAib7xp6AJTsBG3LGiwDJOBzQaLYhBTuMn6UDA47c
        CgYjTeUvHeiwWIm5AqkFhz9KYWGL0oCwDJb5eD3oAe2CTtHFADl+6KAsSKeOoqWA7n1pWAOfWiwB8/Y8
        UWEJx/FyaLDEaTAAGcCiwDixPOaLARs25iuc0WAeo2rjNFgGySEDFFgsNQlgOOtAWDNAWAHBOeKAsIHK
        jHNAWJUJZQaLAL8x+7we9FkAm/HAHFFgJFOVBoEOP3KLEMTfiMCixIitvGMUWAcH8gkDJzRYBYyq42j5
        j96loBIyxMxGMBfWjQBBGJ+RwBRoAYo0AN+3inYA3Z5osAUWAKLAFLQCRPuijQBjfeNGgCUaADDIHejQ
        BW60aAIIwxyDkn+GjQBdrDqMD0FGgCcHp0o0ABj+IZHajQCSIhAcEtIe3aoe4EbM0bFWGCOwpDJEbco7
        mrVrCB+cU9AJVzgVDAY33qQE0eCgAHzUDGShgRuORQIUvz8oOKBkb+Ywzn5fSgBq/dFWrWENk6U9AGL0
        o0AY/wB40aARtnPFOxotiOcHaKLDHJnaKLDFyfUUWAilYsQtFgBkycZ4XpQFiNm3Emg0WwgKZywyg+8P
        WgYGUxdB1qkBGw+amABiOACfpQA9clQcUATAHyxxUsCPo60gEFABjngkn+7QALksflx7CgBW2jkfe9aA
        ImJY5PJoASgCRPuigBrIrE44agBMKvDDLetUgI2+8ccCmBGwDMd4yBQA6OVVBlXgLwBQAqSKVJcjnoKD
        RbELAgDd1oGKRvOPSgze4CXH3uR2oEKCSMnk0APVo8Yx8/rQBIs5QBeuaAFKOvAOBQA+PIPJ5qWA5nw2
        KQEiHKg0AOoAeudo9KAGNgnj73rQA5cgckZosZsax5NArCHI5P3aDRbCOd2ABgUDHEAHAOaAI2KbjkZN
        ADSR24FABvxQApk2pu71SAhA81t570wFYAHGaAEyPWgBjZycDf8AXtQAsY3nrkDuaAHk7jmpYCEHoOJD
        90+lIBWI2cGqQEDFMnIyfWmAkRBkOOlAE0pBoASN8IBUsCeJBMDkgY9aQDHOF5qkBEc5pgIXxwAd3rQA
        5JWztagB7YBoATfjigBr5YZxQAkTlOv3aAJGYMS6j7vAFADQ+x8UATA7hmpZmyRZVQYIOaQrC+bn7ucf
        SgB6uXGD2oAFlJfPJP8AdIosFiRZTu5G32FFgsTPPJIgQdFrN7iEaV2C7fvD71IZagvEgDBh87j5D6Uu
        oilcMGckd63iBXk+4tD3NFsRNjPHX1pFAjmAlzkqfvY71SERsSVyeppjIS0g6dKAHqx27z95eKAFxj+d
        ABmgCRPuigze4tAh6zIq4PWpYWATAvxwKQWY8tuOaDRbETkBjzQMiYjd1oAchG0c0AOWUxk45z6UAA2g
        fMOfpQAyQE/dOF9KAGhSEBJy1AEe4tzmqQCr1NMBmDkfWgB8igtmgBo4agBWABLZoAAxYZoAlRvLQn+9
        QAxAFXFADuv3Tg96AJIzkHy+PX3oAjYjJxwKACgCRPuigAIO4VLM2S5w9IVhxIzQFhyn5eoosFhryKrY
        K5PriiwDVJZskUXEShcDdRcBxbcoNFwBH2wsKVwJi25VPtUMB7n5aQEOCeccUASIeU/GgAHSgCRcFQB9
        71oAlXIXk80EPcXnGc0Ei4NBoth6527lOCvWgYF9sbhRx1oIe4u4dX7jigkMHvyaAFQdaAG9OvFAAd6c
        g8elACmZinzdaAIycrmgBq9OtADD/rTQAr/doNFsQnjrQMZI5UYq09BjFfChqdwIZGZ3LH7pouA5Txxw
        KdwGPndknK0XLWxG+NxxwKLlCKQCeaLgIOlFwDds6dWouAEBOM0XAkQ/KKLgA+/RcBcrvORn3ouZslC4
        G4cr6Urkh1+f+E9qdwGsd2G/h9KLgPPJ+XgUXGNIMXz92ouA1zx70XERx/eouBMPrRdGi2Gt1ouUN+fl
        wfu9KLgI6lQuevWi4C9Og3+oPai4D14UYbI96LoB3PqKLozYc0XQgwaLoAw5PFF0ADOOTRdABYilcB4P
        lKH7tTuAtFxB8xHygL/tVm9wHKrDbubefWkBLKGT51P3qAIw7KME80DGsdzE1aeghKq4D1k2rjNFxjgS
        3NFxCt9ys3uAwgbV+Yj2pAPOM4XJb1oAT5Rw4y3egA34+6DigYbd3J7+tAg3FPlH3/4T6UABnMfIH3qA
        DGKABW2EkfxUDFjPld+aAHF2dmbZkHoT3oAjB2jhcOetAEqjYoDHmgQpcrxigYA569aAJI1YAsp4oERk
        k8t1oAk80xxjbzn0oGR4oEKwO3pQAwZAGT8vpQMilO2QlejUAMI28UCEU/NVp6AE3WquBGoOKLjIz/rD
        RcQp60XNFsFFyiNh8xouARnDUXAJPvmi4DaLgRGSSOU7eh9KLgS7ZPX9aLgIXdeM0XAUEnr1ouAHii4A
        W8vn+9RcA8zyeBzmi4C5TZyMmi4EW/HQcUXQCbkPUc0XAkUjbxwKLmi2GP8AeNFxib8cUXQDGJY5ougG
        H+L6UXAjSNWHBy/pRcB20H5ZECle4ouAEhl4JI9+tFwGqhC+Yx+VegouA5gqrhenWi4DVOFHai4Du+PW
        i4DkfacUXAe8vFFwFiOQDRcze5I42nd3ouIVZePSi4EsUuAaLoBRIw6/d9KLgL5ufujilcABzzTuAtFw
        EK7zg8baLgRtJ8x5JP8AdNFwBZGycrj2FFwGhy42kbR60XAYwAbAbd70XATeV4xRdAGc0XAM46n5fTNF
        wHGMMmR0oui1sQ429CMUXRQm7d8pouAZ2cZ6UXAekuDRcAmm6t/d4FFwIc/rzVIBDkck/LTAVAMll71D
        YDFl+f0PvRdASGYoQRyTRcCSRwGwB83rRcBMGT73VapbAIuS2cUwFZyCfQUAG4nvj60APVkCjd1oAaxB
        PynigB0cm0EUGb3GkljmgQ0u2cLwR1oAUHd049qAF37SAWIPoKlgWc55zmlcByylRilcB2Q3JYg+lO4D
        o5Np3BixTjBouBI2Sc4C55xRdAOWUxDjvWb3M3uAbY+aQh7OXGQN5PUHtQIgKA/xZ9zQMa+AMVaeha2I
        W+7VXKE42DLke1FwIu+Ac0XAa/SqRothiuQKYyRW+UE8UGb3Gnk8HigQ5W2DPWgBrOZDu9aBDlPHJFS2
        arYFbc5HZaVxkom3DNFzN7jiEZMsOaLiI2jUrxwPSi5otiHbt44ouhjkcqcEAD+9RcB7SHPdh6mi6ATO
        7mi4DZMEY5RvUd6LgQkEfeABouA9TxwRRdADuQB3AougGudzE0XASi4BRcBy8xOBzzRcBxPoR0ougDPu
        KLoze4DJ70XQhokw5HWqQEwAcZJ5pgBGOKlgPjcqcYpXAe28nIOAaLgJuLfKf4e9FwE8zfyeKLgSoRtH
        NFxDvMxx/Wi4x4yByeaLGQZ9xRYA3ke9LQBckjNGgEuD5YqHuIaAQOfu+lICWKbgqBhaBjHHTvQIkHSg
        CRD8ooAXNBDE8zaeeYx94etBIeYw6ig1WxPEdyA0AP3kdqCHuJnPNBIu/HFAxpkYsNnBHWgCSZluAFUH
        K0BYbu8n/WcntQIjZmckk8mgYH7ooERL1agBF6UAMd8MaDVbCbh1bnPSgZDMzqSG5WrVrCI1O5QRwp6U
        9Bi8jvTsBG0LzE7DjbyaLBYTI9aDRbDJCPWgZB1NAEi8KKAGsMEsKAGhgeX6HpQBIikKCeTQBKjoVG4c
        0ASgjaMHAosZvcCWTlWHzUWFYXaV4JyaWgBg0aAHPqKNADn1o0AY8Xzb/WjQBtPQLC0Gi2CgY0f6ygBZ
        CWIWgBSu04HNACE468UAIPv0GbJRnFFhWF+bsaLILApKEnqWpaBYTbtjce9PQQpYscf3RRoMeh85cnjH
        rRoAu7IzS0ASoe4g+fscD60gFDleDyaBhkk5J+X0zQA5MHOBxVq1hDcYqtAEX71GgE3H94j2FGgCfwvj
        JrN7gDyY2gc0hjjuaVNvBxQA0BgPmOWoELh+xwKADp9/n0oAEBYsGOMdKBiBuMuOD0oAUA9SDn+8elAg
        J55IP04oAPKH388mgCRVeTZlvkUHHNAEKl2ckHAzQMew3nDHpQIN5XazdPSgY8yrJKWB4NAA8pjR8c7j
        QA6Ufu1oEOUNtG3KnvnigBrK2S6fd9KAG+aw69aBkch3EGgQp60AMePcM0AQbSDgVatYYEEdaegAclBt
        PPf3o0ERtgrwOKegCCJmjBBx7UaGi2BVKrg0aDuKCMNz2oGQigBcUAJQAFtncHPYDmgA2hOMEexNAEb/
        AHjQA9CNoA+9QArAgDPWgBj8se9ADcH0oAkUmMDjlqAHbccdaAI2B3HigB8ceVJORQWtiMjBwOaChKAG
        MCTxQALwWzQBEVdj8nWiwERSUSEE80WAeoO7nqfkoAdJgEbgSBxQAkm042DC0ARzHkUASDpgH94fun0o
        sBIhyBg0WAXn1oADuj5PIbp7UGb3EDeU+2T5j2xQIlyT1OTQA4HG3mgCVjmVcc8dqACOTaaNAJC245oA
        aX2HI60AKH8z5u9ADG6mgBvmY4zQBGzZYmgBMjt971oAFBDc9aAsK7bGJHegCNgik71LemBQA5T5YBBJ
        J/hosaLYSWMeW+QF9hQMhOBxmgAoAKAHqm4e9FgGtsVsEc1SARkVlyOBTAap8scdalgNaRZCSVO/ucUg
        CMjPUUATiQgYCgj1osgF3knZjAbmqQBl25zx0pgB+Ujd90feB70ARS5yM9aAAtk7e1AD0G04oAdJ1FBm
        9xTnr2oEN6Mc0AOaQA4AO71oAcuQu4n5qlgL5uaVgHxncc0APZyDigBY5eaAHtLzQAglJ6fpWbM3uSI5
        B6EUhE6NncTQFiJkBOc0BYjbGcL971rRbGi2E8vJ+Y/NTGQzRDJoArlinyj7/wDCfSgLClgyAiqRothF
        B2imMjkyGyx+Wgze45ZABhelAhXywUr170AI5BY4oAjA3uR021LNFsTJJuyCaQxybVUAfe9aDN7jg5HB
        5P1osIcTuSg0WxE/C88UDGF9yqP7tADjOzHJ+6e1FgGiYbvl6UWAmB3DNAEMvegBkUqqCNgLetADUmLv
        5Z4Dc0ASE5P6UAMftQA40AOE4iAC/eP3qLAI2CcqMCgBUKBuRzQZsc7BCSvQ0CI3ABwPvetUgFQ88nJp
        gT1LAMP2OBSAkRWZfnIIFACtIAmV/i7UARExqcHk0ASRMmCT90/dFAAMgYJ5oAmB3Y96LgBjDc0XAkUE
        KBms3uZskUZATP3utIQfOehwPrQIOe5yaABQwfJ+7QBMs0akjGKAEGSM4wvYUALx1HAoAKAHR4By3I7U
        ASMGzljke1ADTJg4A4oGOSYk4xgUAPd9rEUAAJIzQAvNACGVo/unBoAYXaQ7n+8etAhKACgCN/vGgB0f
        ANAEDvhiKBg33N2etAELuV2sTlT2oAc8ioMHlf4cUCGqSRkkZrRbGi2GeaYmbHOadyiI9TRcCNpCpI2Z
        HrRcB0LZLEjb7UXAazbnK0XAbgLxnii4Bii4D1cqMUXAljTedx70XAcx+YpRcBAu1yKLgSDhqze5m9yR
        +lIkjUrjBHNAxykZbHHtQIQA4oNFsNb7xoKErRPQBKdwDAHzZFFwANuGaLgJ5m1yKLgNcea5z2ouBLGx
        KDJxRdAPwaLoBPxFZvcBefWkAc+tBmxADuNBI9+lAEa5xk8rQMXeAfl6UAHmqOqkmgCWJgQSOBQIRSgb
        kc0AOdih3KcL2oGN3F/mbqaBC0APQjaAPvUAOLGPqclqAAgLwOGoAQsY+pyTQMXAX6UCDI9aADNAAB5n
        H92gBGcyBR2oGKzbDgUAG5CMsOfpQIMjqOBQAp5QUAQnrQA6MgH5uR2oAkJUN8xLP6UANCBnzgL7UASj
        C8ZoAT55XEan5TzQBO0hdQWPzdKBkJcqcYoAUNu570ARt940CE7470AKT8tAERXb81AAZFdAGH40AQnC
        ZZf4OgoGKFPb60AMbhjmgQ3Jb5e1AxcIvBGT9KtPQtbDX5AIHFVcoUtk7e1FwI2G1iKLgJRcBGIwOaLg
        NfljRcBOccgAf3qLgOTbjh959DRc0Ww7OewB9BRcYqShS27kdqLmb3EjY/M5PzL2ouIenyrg9etFwGsH
        LHaePrRcBvmsDtY5AouAuFX94pJK9FouA05k3ZAXHOKLmi2K+WPOcfjSuhjGhdjnNFwHK0sKgdAf4h1p
        3Aay7TuLbvc0XQCeaT249R1ouAxg7HIYkepouA3ey8HrRdAMc7iKLgSDhkzxx3ouAxZMMRRcCZpMhdo+
        b1ougHeYx68n1FK4CYP36dwJoWyATxRcCRim45HNFwJPNQRhUG1h1rN7mb3EU7gCBSESqUCjcOaAF3xj
        58crxQBG5EbZXo1aJ6AJjb1Py07gRvjcSOlFzRbAM44UEetFxiH3GPai4BvxxRdAMYlm9z2ougHiTbGB
        RcCPdnnIougI2B3ZJBWi4CPg42jii4AW3Hb2ouAu3bxRcBvmBXIAw3rRcBQS0hJ5NFwB+Uei4B0fnjp/
        Ki4CT5K/KcHvRcCsMEcdKLgWIv8AVii4D95HHalcB6BiokB/d/xCncBhJJJk+Y9vai4DAcPyRRcB5OTR
        cBjPhgKLgT5Lc5ouAbjny/71FwDcpOXB2jhh6+lFwI3cqxA6dqVwHKcqDkCncB3PrRdAPilMTN70XM3u
        TDHljFFxEQ+/RcCyjIFGRzRcA3qrZQYNFwJQ7OMseaLoBsiuw2g8NzWb3EN5EY3daQDY+tWnoMcwCndm
        quBDKd+T1ouaLYrnNFxhz6ii6AR3I2jrRdANfEjnfyD0ouA0xeT1IzRdAAlB/iP4UrgKDnnOadwDKdxk
        0XAilfBG0cUXAejA5zRcCMs4PHSlcB0byetFwJCTMSrdqd0AUXAGOF3d14ouAi8Ci4CCZkcjqtFwJhNH
        J1FK4Ctbqy5BAH1p3ArPH5bHHNF0A5GyoJouAuR60XAkt3jV38zv0ouAwsmTx83rSuA9Qdop3QDW60XA
        bwDk/c/iHrSuA9F3rg07gNaLy2JHP0ouA9C7OhBx1ouZvcAxXg9c0riJFOVBNO4DGfB4pXANm/n1ouWt
        iSNdgJp3RQLK2PuZ96Lmb3LCy7V3d04oESoflHI55oAdzWb3M2NH3qQrEx468UBYRSN3WgLDnDljg8fW
        gLDVXc58znHSgLCmZmYqecd6ADzD93HHrQBIowozQBIhBUc0BYXzdpxkUAKG3c5oATzAvDcjtQFgbLBS
        eTQArOV+goDUTzaAD/W9e1AC5J68fWgBASWI7etADiACQOfpQFiJ/vGgLEcj4GKAGKdwzQFhrZzwaAI5
        Oh9aAsNH+rFAAP8AVitFsWthF4UZ4plDW5JxzRoBG/K0aARjpRoFh3l7/unB70aAG0PwOAtGgCeYfSlo
        A+PLHOKYE46UAIOHoAOvmY56UASuRheaze5mxT9aQgK7fm70ARsxZskAe/egByfdGGyPU0Gi2GsrA7ga
        BibiRljzVrYBkrbBx3qtAGKAoxmgAYs4CqcUASjagCtzIOpoAXPvQAgG9yP7tACtKSelACKcvk8Vm9wH
        M5B4FIB6ElQelBmxjM27CZBHU+tAhynIyeF9KAHcHlelACD7xoAc2c8UAN3EcUAMaQ5PFADwR5YLjOel
        AWEDFRg0ATRMCCc0AAwRx96gBGfaFH8Q70AKSSfm60CDrQAZydtAwK7eKBBQAYz1JT0I70DJFJxlgAPQ
        UBYXKnp0oCwc9z8vagLEbgFtgGA3NAE0LfIST7UAROPmNAWG8dBw1AD0yFGetADqBEbD5jQBPbEx4PrQ
        Mluk2kEc/SgQwEsM0ARufLbP96gYFcLigLDkZPKCgfvj90+lAELnYxI79aAEICqMHJ/u0BYjYPKu3hQO
        1ADVAVRuBJ9aAsGFPRiB6UBYY0YJznPvQFhyjauMigBrHnrVrY0Wwm8qcAkn+72qhkcpJIJG0+lACAZc
        0AKybmo0APkXgjmgCNnwx2jiiwDSc8nigBQTjhQR60tDRbD1ZNo3/IfbvT0GNfliQMD0FGhmxUG07u9G
        giQAOSxOM0aANA2jFGgCpGJS3I4o0AaDRoAxuWo0NFsRsiE5IOaNBhtwPl4WjQBN5BxRoAxzuGaNAGKp
        Cgrwe9LQBrTF22gHH0pgIxAXrigBFyV+7gf3hRYBjDzGK5JC9zRZAJt2/NRoBIJSYxt4PeloA+NmCApw
        G7UaAO27eC5z7UaASKoVQzfMD0o0AFkbdzkmnoBJuzyaze5m9x8cu04pCJGO45oAQkDrxQAVatYAz/sg
        +9VoAxs7jn7voKNDRbCb9vAGBS0GISTzT0AM5o0AaActj75+6fSloAwcDJ+7T0Aa5jx0paANXG3jpT0A
        CSnI/io0AXG3ijQAzQBEx+Y5Py0AOTDHglB2x3o0AcXKyEFdvtRoAOBK43f6v+IetGgCXUBgIYnIPb2o
        0AgYAH5fu0ATREbByKAGvI0TZ6qfSiwD1kcgLEdq9896LAJIDj5eD3PrRYBimPaPl/SgCRCpXjpQAyVu
        d4OStADkOxsglj120WAm89mGSoQeoosAKctkEt7miwCSD5zQBG/agCVSCBt+960WAUbu55oM3uNEhjfj
        nPpQIs7SqKxPB7UAPLBvmHANADfMx0P60BYlRsqDmgBfMIOBWb3ATd53yk42+tIBRWi2AMqPvDIpgRzs
        FClOh7UaGi2GPF8vWjQZVYbSR6UaANJI+fuvFGgCMMMvvzQA665Mf0oAjiIEYycdev1oAkzQAZoATI9a
        AIJf9YaLAKkjqANoZaAJlYFQcbfagA3D1FAC5oAKAI+dzbAGP8We30oAdGVCjB496AHDnpzQAUAGaAI2
        O5iO1AEJbZKV9KNABjk5o0AerkKBRoBLGzuyAHjmjQBQNnykjIo0AXPGe1GgDQ+HwOhoAcx8o7QcgelG
        gCFgw4+960Gb3HpkHk80CHN97JOV9KAE8wZwvSiwC+YaLGi2DJPNFhiF8cbiPoKDNliMEdetZvcHuSnl
        lpCJ0UPI2X20ABiEPLfMP4aAJImWUFZByO5oAi4Mhx0oAlxQISgYKSzbV49aDN7iurBvlOFoJHoWIAc5
        Ws2aLYUBQxxwKQxzIGOeOaBibccYoEFAEsDLu2v8q+ooAfOIyxjjYsjc5NAEaMhXkZPSgZIxUxqFGDQI
        bgySqrH7vegCFmKsQfu+lAAsvLYXavrQBESGPB3e9ACkfJQA0A4+U4PetFsMY74Y7elMCPOWY0AIAfLo
        AaG2LnvQA1mLncehoAGl8tRtHBoNFsNXpQMY5+Y0AJQAqHrQAgoAesvlKMc5oM3uLvxQIkUkqCT8vpQA
        773+r4HegByNHnpQBIyiRjjgDpQBEwdjkHigA+UfeGW7mgBcjDY4GKAGJwtADJeooNFsBZM8jJoGRvjc
        cDArRPQze45fuincQ1mIYgAn6VmwFQ5PPH1pAPbk0APT7ooAH7UASr0AyPpQAvPqKAI2Vix+cj6UAIoI
        LZOT6mgBAxUYxQBIpJUHpQA4ZPegABJ6EUAHJ70AHPrQBGwO7nlaAHrgjjgelAh69OaBjkG8tz0oM2IG
        yMmgQvmAcD73rQAgJL5brQIcz4YigYjHIU0CHLyzYoNFsNVW6kErQUISueOB6GgCUOrRhR95e9AEe4vy
        3Ws3uA4Oo2owyrc0hEjursSvC9s1othkT/eNMBR/DQZskcjd1oJEoATfjpQMf5vyrWb3AeZSTSERswJJ
        bkdqDRbCJwTk/jQUIOQKBCOMg0DG/wDLMVotgGqDjn7vpTAcXDLtHAoAiMLdmwKAEwV4LCgBrFc8jJ9c
        UANIDnA4C9BQAZduQcD60ANcEj1PtQBGHIGKAAOHbb0b1NADjkHaTnHegBCAvFaJ6Gi2GMVBJYZWncY0
        lf4Rhaze4AGTuMmkBIpAHHA9KAGsCSTg49aAFLZRVPAoAl8oAHmgCOJdoIoAmto0kMm4chDQBWbGeOBi
        gBKAFLZXbQBEQUy39zigBjDaf1oASgBFkKzr7CtE9AIZXQyEsMr/ABD1p3AFdwBtPHalcBku5yqg4Lct
        RcAYhjx06VD3ASkA9JNpxQBKrgvnIoAeQxOVPB96AELsnDA/WgB6NuUHIoAcV2/N3oAekuVFADgQeW5z
        0FAAchOTzQA0dKAJI3ROSOaAEkcSOWHQ0AIc7Ofu+lAEa43HAwD0oATD7B83y9hmgBqlQPm5HagBrSBT
        hgSfWgA3BuRwKADNAEc/QUANEq/cIJx7VaegDGwWO3pVXAdHOIwdv3vWs3uBJHKZFBYjcaQDipX5ieD0
        9qAIyDIxDn5u9AEc+YgFPKirT0ATeoAKDBaquAZMfB5ougHGXCrnii6AkbfONucAUXATBEYz1ouBEQD1
        Oz0I70XAQff5AX2FFwJBL5bnHei4C4bzCQeKLgTxyFTgnJougHltxJyKLoBmzLMSRtNFwGhwnC9KVwEL
        BvvNs9CO9FwJFkwOcL7CncBfM96VwJEYuMH7tFwF/drwB+lO4AQx5XhaLgOjkKHBPNZvcze48qHk3HvS
        ES8KMZoAF6tQBGetBotiOQdKBiGMOdvZuTQBBJjefbigBmN/4VonoA2SX7ntmndAVQPNIz2NK4Ejy/NT
        ugE8w+lF0Amc80XAKLgL5hHGMD+9RcADb+Mkj1NF0A9QEXDcjtRcBcjp/FRcBSWj68lqLgDJuTH93mi6
        Ai37+DxRdASRoyggHAougHxn5Bk5NFwEJAduaLgOj+6KLgNcKxOCA31rN7gRMpDEdT7UgE3FeMGgCxEd
        0YNACbYy7ZHNAAi7VH9z0oAR/mY+Xx61aegD1xtGBgVVwFYjbRcBqfdouAuR7UXAkGcAEBR/e70rgGfR
        s+5p3QC5PqKLoA59RRdATxtk7egrN7mbJVAV8ZpCHsSxIwcL0oAaJJJvl6BfWgCVNxUZPNAABtYtQA5w
        5XeD1oAapZhknmgB8f3vegze4T8sDQKw6OQjPFZvc0Ww1HLNg8Uhk4ULw3zDtQAnmFeCaAFB3c0AFABl
        MfN8vuO9AAZMHgbfYUAHztyDxQAm8jg8mgBd2eaAI2zuJPK0ADFSny8GgBhkZVUHk0AI5LNmtFsA0uVp
        gNJ3HNADSH7HA+tADJM45OTQAxelADmG9ME420Gi2IS2eaBjDkng0AKCABkjNACMcHqB9aAFQknaaAHs
        NrEUGbHp90UCFzQA7zvlVPSgB3/LSgBwO5mXcRQA5F2qADmgB3PrQBFKDkUABjyc0ARtgMRmg0WwJbtJ
        lwcDtQMiJLRyE8nPNWtjNgRnpVaCHxt5ak9M1mwBZUcbmHJpALkHp0oAC+OKAJE5UGgAHDF+60AOIwf1
        oAaWcHCnigCRCxUZPNADufUUAMbrQA3BP3eD3oAQnZyvRqAJFG1QMigBG60AMD4fFAEitlsmgB5yTwaA
        FU8UGbEm+6tAhU+6KAFzQAtAWEoABgtydg7Ed6C1sTJM0RJI49BQURl45fnYYJ9aAEIA6dKAEBz05rN7
        gKwOFGOaQCzfdAq1sAlUAYoM2HegVgwRy33aAJFIwMcCgLAv3s1m9wHMCT8vB70hDwVMY28EdaDRbDTE
        si4UYVuaCgjdYkG7kL83HtQAnmLIzOOA3OKAIT1q1sApACbs1QEWS3NACZLHaaAGNCAx5oAeqkKADQAw
        7fMORk/SgAZFY5HAoAYMB8FtnpjvQAS53nIx7UAQP940APTG2gBsnUVatY0WwkgyQnZuTVaDFZk28jkc
        Vm9wGKVz8owfWkA9oyTlutADwqhABISf7vagCNxjG9T7CgCQAgc9aAHJ96gCQS7WZv7vAoAr5+dyAHz1
        B7UARgYHBz7mgA6sPrQAku4yEg/ux94etAEThsYbk0ANXpQA08O1WrWAgbg1WgBvK8YNLQBN27n1o0AO
        +O9Q9wCkAUAAKBuRzQBZV1RdxGR2HpQAod5Pv9KAE2Kj5XpQBMGLjOaAEH3jQBMv30oAQDr9aACgAAyc
        Dk0AFABmgBr8jA++fun0oAgzuJUD5/4T/OgBdoXgUADSELigBsbZyelACIfmoACPMd/agBgLMMjg981a
        tYCOVFcg52DtjvT0AUqdxG3GOwqGA1cFuPvetICyhwoBIzQA15UU4x83rQBDIxkIGMj2q1awAy7Tiq0A
        AcfeGR2o0AApk4PJFGgAshy1GgCLMrDa27P0paAAwH46e9PQBzcsaNAEyY+f71GgBt2nFLQCSLoaNAJo
        FQqCMBu5PejQBzhd5CDinoA3Kdxk/SjQCNmjLHj9KNAHxNEAdwyD0o0AF6UaAPWRojwDzRoA5nIPFLQA
        yTzmjQBAfmNQ9zN7kyY+YsMjtSEOgwVIkIOPu0AKvmMM5/WgBeR1PNBotg3Z47UDIZ/3fTkH0oAgZdqY
        oAiaXauMgVatYCMncmarQBoBxRoAu3fx6UaACtmRDRoAp+5+dGgDB0oAXtntRoAUaALvK8YpaAGSwyRg
        f3qegCbXP3WJHvRoBIm4KNxyKNAHtGvkuxGQego0AhPXltzf3aNAEIfrwo9M0tAHRhgW48w989qdgCIg
        /KWKgdD60WAmaJM/Moz7Vm9wIXUwtuQgBu1IBvmt90/nQBLEGwcGgAUYGc5NAApkd+MgUASKpR8GrVrA
        OYjdjPNVoBEfvk9vWloAMdhyOd1PQB6qMYfkD7tGgDgS3Xk0aAGUH3hz9KNADIPTpRoAYpaAWG6LWYFg
        NHsXj5vWgBZHcAYPAoANx8zLHmgCUOR0rN7mbJRH+7Ejf6r+IUhC/wDLIenagBFUSKAB83rQAySM25zn
        JNADkbcNtAhclOMUDDOT70ASKGxxwO9ADGKljt4FADlk2jFAC793BNADHVwxCnA+tABGDznk0AOQcfM5
        A9KAHKFUsynj3oAiLbuTQAmR60AIFyzL2bmgBvOzkYxxQBEXI4xWi2APmPJ+76UwAyYOFHFADGJZs9zQ
        A2g0WwDnpzQMbIRjrQBCeVoAaucUAOMayrjOGFACRBG3CUZI6UAOQ5UGgB1AEiHgUAMf7xoAdGyA/MOa
        AJwR26UGb3JFPyjmgQxj8xbqV4oAeqkKPzoAY8hViKAANlWJ64oAhEe7mg0WwM7hdg6CgYkMQncxO23P
        OR3oATD73xhQOMA0ARngLzub0NADmPPIC+woAeh+UUALQA9ZCoxQZvcdu3c96BCnigBADv6UAK3WgAoA
        MUAIZkXgjmgADBhkdKAEH36AHHrQA0A76AHMpB3H7tADlbcMjj2oAUfeNZvcBWzuJPK0gE34+6DitFsA
        vJ5pgPH+qf60AI4JbigBuDnFZvcBN7jhTxSAXDSfe6igBN23kEkntQBYhhRoXJOx87cCgBHEm3ORgcbu
        /HFADFyVySW9zQAux1G/cNp6DNAB5h9KAEHDlu5oEOaTzB9KAGq28ZPWgZJhii4PFAEqEk7TQISSFi5w
        eKBiqGiAzyD2oAawAY7RgUARP940ARtnNAAfuigBq5xWi2AXn1pgHPqKADn1oAOfUUAMbrn9aAImOSeA
        B/eFBa2G8Do273NBRG3LGgBI+JGzxQAx3IY0AOjyTnFABICXOKAADgIeN3JoAUHPIJY9MdqAHrJtbbja
        /pQBI7Ejk5NADF6UASoyBRkc0ANcgscdKAIX+8aAEoAN5UYxgH+IUANaPyzhTuHrQAwfeoASYg5x971o
        Ag3lOJOfSgA+788nJPSgCMlmYluR6UAIAsvCjBWgA3buv3+5oATJj6nk9aADGOBzQArdFoAnRhtHIoAa
        wcsSGG3tzQAZG5eaAFifBxQBYBLDNAD1lRRhhk0AL5oPQcUAGd3NABsJGUcrIeh9qADcrcrnHv60AMbO
        aADBoAieQqxFAAG3DNABQWnoRvEzMSOlA7jY1KuwPWgLkq8CgdxjY3HnJ/unpQFyJxg7iApPYUCuIsxX
        J5TPcDrQO4qZ+bI2+1AXJITE0EysP3v8BoC5AkmGy2W/2ccUCuW0YOoKrtB7UDuRTd6AuRKCBz930oFc
        PMxxH8uOuaAuG4NyOlA7igPvTB4oFcTBGc9c0DuLtwNwoC4f63rxj1oC4hbLRv1K8UBcEYrIwRjnqQel
        Bm9yUETDkBMdqBD1m8pQ3dqAHlyEDDnd6UARKNpIzQA1chufu+lACuGZwU+72oAmYSAAE/rQAxZCox1N
        ADwd31oAF6tQA6GTgxdA3U0ASRsm0ZHNADiGPK8LQAcjqeaAJEjLKCTlfSgBJNoGF6UAVpORQBVZF3E7
        d5PXPagBF2qWAOR70AJwU++R7CgBBwO5+tADGXaS3rQWthMu/IoKuPUqBhhlu9AXGtIFbOP3f8Q9aBXH
        KTgZ4J6UDuLketAXAMfuDo3NBmxd2/G4mPsPegRIobH3MnuD2oAQFI3yXZg1AEjpGR+7/WgCAoQfLPO7
        k0ASefsjAH3jxVJ2LWxEpO7k5NPmQ9CyhGAKl6kPcZIqeYCw5pCEnwCQOlAEKAlvl4Pc0AOMgEh2jigC
        wjZUZ4NAA/QUANcqCXIyV4oASThF/u9cUAPjIKjb0oAaw8xj6LQA+JgwPGGoAaoZWy54oAkODyPu0AN+
        bs3H1oAs+ai8EZNAEisGUEcCgCaIZ+T+9zQA2OLzmP8As0AOZ33eWPlVu9ZvczYGUbAWclBw/vSEOjkY
        IMkle1ADvNY/d4XtQIUFiMk80DE80A4H3vWgCRJDtGeTQA7tuIAB/i70AJ5uehLe5oARTl80AOf7xoAE
        wCd3IPSgBoBA560AIJMOR6UAPYc7/WgBN27mgCNm3MV9KADaV4BoARXcFgDxQIYxkZc5oAWLdsGTWi2G
        NeUqxFMADbuaAI2kxMooAiJySfeg0Ww6MEn5OCPvUDElaPeeKAImyWO3haABsbMfx+tAEWCPvcmgB652
        igBdoPViPpQA8fcXBz70APZdvzUAN3buaAHAKu1mGQaAJxJE75A4oM3uOJBPHSgQ3btYtQArTc0AKfub
        /WgBqOjKCRzQA1yCxx0oNFsRM25itAxpXAzHw6dTQAxgQf1oAcvSgBrZzQA5elAEqK5UYPFAAAQ5z1oM
        3uTYRRuI5NAgDK3JHB6UAIZCnB60AMZtzZoEPT7ooGL5hU88r6UARs8bHOKAJAQYxjpQAifdFACmQrxQ
        A9CWUGgB3PrQBEf9aaAJU71m9wEGcUgF5rRbAHNMA5oAFk2lhmgBI2yGk/u8Vm9wJYYiVJYAIec96QEb
        uEGFJKjoTQAiksuaAGtJtYCgCZ1M20LwaBD5raW3RXZsg0DIWfy2IA3+oPagBqy/NwSfc0AOaZM8jJoA
        TzQenAoAepyoNAE0XQ0AAiZhkHigA3GP5T1FAB5tAAqvK5AOBQA5kMZ2nkigCvJneaAFXpQBDNJtyK0W
        wBESyA0wCTpQARZ2CgAk6UAMGBGDkk/3aAGfUbfYUGi2BtioGI5oGRZMhynGaAI2DhiGOW70AOXpQAu1
        z0PFADGaRSRmgBAjONzcg0AOI+VQnFAEjFQcOMydzQA2gB6zIigHrQA7cG5HSgAoAjf7xoASgBRHu5oA
        MbehJPoaAGT5wuRt9hQBE8e5c0ARMNq4oAT/AJZigCI89Ts9CO9AARIeRhR6CgA+bGGAH+1QAmYx1yx9
        TQA5CDnHSgAP+roAaGQDkc0AOTB3Y6UANFAD45MHFAE3m0AKDuGaAJFztFAEijKjJ2ehHegBfMI4xj2B
        oAGO4KaAGyZ3GgBhnMZ2+tACSQ4FAFctsOKAE8yg0S0DzKB2IzMDIQPvUBYVpGzz1oAUnKZoCwnCxjdy
        O1AWEiEmDzQAByowetABnPNAWDzjnZ6UBYVndVAB4oAZ5xKqp7UASMu35qAsQ70aQkjmgLEvmxjjbQAm
        4NyOBQFhx+5QFhofAxQAu/fxQFhQu2RBQFhvr9aDNhQIKALEZMcYY/dbtQA4RAv8vAoAiuQFYgfe9aAG
        RMUAJ5NAD5JTJh/7vFADmUIcD73WgBgcq5B60ATA7hmgBcZIT+/zQA0S4c+3FAEwJYZoAOaAHrJgYJ2Y
        6Ed6AHAGXqMe1ADJE8v5fSgCJo9yZoAryRcUARqmxc0AOLbo80ARt92g0S0GrnaKBi80AIy+ZgH+GgLE
        qOm9DIM8cUARkqCcjmgByhioKnC9qDN7gflYeZznpQIsOsmBk5XtQA2OVF3AjmgBisGLEdKAGigC/p2m
        x3rBpJjEFBIAGc1k3qWloU7lFjkJU/LnA4xU3ZVhrTE9QAP7wrVbGb3GtLwuDuHqaoQ/bv59aAEI2nFA
        ByR0wP71ACcdiW9zQBIkvGz0oAmThRQBBL/rDQAxZfKJ96ALEP8AqxQA+gCKXqMHJ/u0AK5dhtwFHoKA
        GhSigHrQB//Z
</value>
  </data>
  <metadata name="menuNode.TrayLocation" type="System.Drawing.Point, System.Drawing, Version=4.0.0.0, Culture=neutral, PublicKeyToken=b03f5f7f11d50a3a">
    <value>273, 17</value>
  </metadata>
  <metadata name="$this.TrayHeight" type="System.Int32, mscorlib, Version=4.0.0.0, Culture=neutral, PublicKeyToken=b77a5c561934e089">
    <value>63</value>
  </metadata>
</root>
