# Supplementary material
Source: MDPI journal article supplement (https://www.mdpi.com/2077-1312/10/8/1051)
Supplement: s1 [file s1 › DMS/DMS/MjbManagement.Designer.cs]

namespace DMS
{
    partial class MjbManagement
    {
        /// <summary>
        /// Required designer variable.
        /// </summary>
        private System.ComponentModel.IContainer components = null;

        /// <summary>
        /// Clean up any resources being used.
        /// </summary>
        /// <param name="disposing">true if managed resources should be disposed; otherwise, false.</param>
        protected override void Dispose(bool disposing)
        {
            if (disposing && (components != null))
            {
                components.Dispose();
            }
            base.Dispose(disposing);
        }

        #region Windows Form Designer generated code

        /// <summary>
        /// Required method for Designer support - do not modify
        /// the contents of this method with the code editor.
        /// </summary>
        private void InitializeComponent()
        {
            this.label1 = new System.Windows.Forms.Label();
            this.MjbList = new System.Windows.Forms.ComboBox();
            this.btnAddMjb = new System.Windows.Forms.Button();
            this.SuspendLayout();
            // 
            // label1
            // 
            this.label1.AutoSize = true;
            this.label1.Location = new System.Drawing.Point(44, 43);
            this.label1.Name = "label1";
            this.label1.Size = new System.Drawing.Size(89, 12);
            this.label1.TabIndex = 0;
            this.label1.Text = "主接驳盒编码：";
            // 
            // MjbList
            // 
            this.MjbList.DropDownStyle = System.Windows.Forms.ComboBoxStyle.DropDownList;
            this.MjbList.FormattingEnabled = true;
            this.MjbList.Location = new System.Drawing.Point(139, 40);
            this.MjbList.Name = "MjbList";
            this.MjbList.Size = new System.Drawing.Size(121, 20);
            this.MjbList.TabIndex = 1;
            // 
            // btnAddMjb
            // 
            this.btnAddMjb.Location = new System.Drawing.Point(294, 38);
            this.btnAddMjb.Name = "btnAddMjb";
            this.btnAddMjb.Size = new System.Drawing.Size(75, 23);
            this.btnAddMjb.TabIndex = 2;
            this.btnAddMjb.Text = "添加";
            this.btnAddMjb.UseVisualStyleBackColor = true;
            this.btnAddMjb.Click += new System.EventHandler(this.btnAddMjb_Click);
            // 
            // MjbManagement
            // 
            this.AutoScaleDimensions = new System.Drawing.SizeF(6F, 12F);
            this.AutoScaleMode = System.Windows.Forms.AutoScaleMode.Font;
            this.ClientSize = new System.Drawing.Size(437, 95);
            this.Controls.Add(this.btnAddMjb);
            this.Controls.Add(this.MjbList);
            this.Controls.Add(this.label1);
            this.FormBorderStyle = System.Windows.Forms.FormBorderStyle.FixedToolWindow;
            this.Name = "MjbManagement";
            this.StartPosition = System.Windows.Forms.FormStartPosition.CenterScreen;
            this.Text = "主接驳盒管理";
            this.Load += new System.EventHandler(this.MjbManagement_Load);
            this.ResumeLayout(false);
            this.PerformLayout();

        }

        #endregion

        private System.Windows.Forms.Label label1;
        private System.Windows.Forms.ComboBox MjbList;
        private System.Windows.Forms.Button btnAddMjb;
    }
}
