# Supplementary material
Source: MDPI journal article supplement (https://www.mdpi.com/2077-1312/10/8/1051)
Supplement: s1 [file s1 › DMS/DMS/modifyDeviceInfo.cs]

using System;
using System.Collections.Generic;
using System.ComponentModel;
using System.Data;
using System.Drawing;
using System.Linq;
using System.Text;
using System.Windows.Forms;

namespace DMS
{
    public partial class modifyDeviceInfo : Form
    {
        string dCode;
        deviceInfo f;
        public modifyDeviceInfo(string str1, deviceInfo exp)
        {
            InitializeComponent();
            dCode = str1;
            f = exp;
        }
        /// <summary>
        /// 修改界面初始化加载的信息
        /// </summary>
        /// <param name="sender"></param>
        /// <param name="e"></param>
        private void modifyDeviceInfo_Load(object sender, EventArgs e)
        {
            //修改界面默认加载
            try
            {
                string sql = "select deviceCode, deviceName, deviceIntfc, deviceElec, deviceExpression,deviceProtocol from tb_deviceinfo where deviceCode = '" + dCode + "'";
                DataTable tTable2 = SqlHelper.ExecuteDataTable(sql);
                DataView dv2 = tTable2.DefaultView;
                DataTable tempTable2 = dv2.ToTable();


                DataRow row2 = tempTable2.Rows[0];


                txtCode.Text = Convert.ToString(row2["deviceCode"].ToString().Trim());
                txtName.Text = Convert.ToString(row2["deviceName"].ToString().Trim());
                txtIntfc.Text = Convert.ToString(row2["deviceIntfc"].ToString().Trim());
                txtElec.Text = Convert.ToString(row2["deviceElec"].ToString().Trim());
                txtExpression.Text = Convert.ToString(row2["deviceExpression"].ToString().Trim());
                txtProtocol.Text = Convert.ToString(row2["deviceProtocol"].ToString().Trim());
                


            }
            catch (Exception exp)
            {
                MessageBox.Show("修改设备信息表出现异常！" + exp.Message);
            }
        }
        /// <summary>
        /// 设备修改
        /// </summary>
        /// <param name="sender"></param>
        /// <param name="e"></param>
        private void btnAdd_Click(object sender, EventArgs e)
        {
            try
            {
                //1.获取主界面上的接驳盒类型，IP地址，端口，通道数目等数据
                string deviceCode = txtCode.Text.ToString();
                string deviceName = txtName.Text.ToString();
                string deviceIntfc = txtIntfc.Text.ToString();
                string deviceElec = txtElec.Text.ToString();
                string deviceProtocol = txtExpression.Text.ToString();

                string sql = "update tb_deviceinfo set deviceName='" + deviceName + "' ,deviceIntfc='" + deviceIntfc + "', deviceElec='" + deviceElec + "',deviceProtocol='" + deviceProtocol + "', isDelete = '0' where deviceCode = '" + deviceCode + "'";
                SqlHelper.ExecuteNonQuery(sql);

                MessageBox.Show("修改成功！");
                this.Close();
               // f.listMjbInfo(f.searchMjbInfo());
                f.listDeviceInfo(f.searchDeviceInfo());

            }
            catch (Exception exp)
            {
                MessageBox.Show("修改主接驳盒元数据表出现异常！" + exp.Message);
            }
        }
    }
}
