# Supplementary material
Source: MDPI journal article supplement (https://www.mdpi.com/2077-1312/10/8/1051)
Supplement: s1 [file s1 › DMS/DMS/modifyDeviceInfo.Designer.cs]

namespace DMS
{
    partial class modifyDeviceInfo
    {
        /// <summary>
        /// Required designer variable.
        /// </summary>
        private System.ComponentModel.IContainer components = null;

        /// <summary>
        /// Clean up any resources being used.
        /// </summary>
        /// <param name="disposing">true if managed resources should be disposed; otherwise, false.</param>
        protected override void Dispose(bool disposing)
        {
            if (disposing && (components != null))
            {
                components.Dispose();
            }
            base.Dispose(disposing);
        }

        #region Windows Form Designer generated code

        /// <summary>
        /// Required method for Designer support - do not modify
        /// the contents of this method with the code editor.
        /// </summary>
        private void InitializeComponent()
        {
            this.txtName = new System.Windows.Forms.TextBox();
            this.btnAdd = new System.Windows.Forms.Button();
            this.txtExpression = new System.Windows.Forms.TextBox();
            this.txtElec = new System.Windows.Forms.TextBox();
            this.txtIntfc = new System.Windows.Forms.TextBox();
            this.txtCode = new System.Windows.Forms.TextBox();
            this.label6 = new System.Windows.Forms.Label();
            this.label5 = new System.Windows.Forms.Label();
            this.label4 = new System.Windows.Forms.Label();
            this.label3 = new System.Windows.Forms.Label();
            this.label2 = new System.Windows.Forms.Label();
            this.label1 = new System.Windows.Forms.Label();
            this.txtProtocol = new System.Windows.Forms.TextBox();
            this.label7 = new System.Windows.Forms.Label();
            this.SuspendLayout();
            // 
            // txtName
            // 
            this.txtName.Location = new System.Drawing.Point(158, 127);
            this.txtName.Name = "txtName";
            this.txtName.Size = new System.Drawing.Size(150, 21);
            this.txtName.TabIndex = 36;
            // 
            // btnAdd
            // 
            this.btnAdd.Location = new System.Drawing.Point(108, 317);
            this.btnAdd.Name = "btnAdd";
            this.btnAdd.Size = new System.Drawing.Size(75, 23);
            this.btnAdd.TabIndex = 35;
            this.btnAdd.Text = "修改";
            this.btnAdd.UseVisualStyleBackColor = true;
            this.btnAdd.Click += new System.EventHandler(this.btnAdd_Click);
            // 
            // txtExpression
            // 
            this.txtExpression.Location = new System.Drawing.Point(158, 250);
            this.txtExpression.Name = "txtExpression";
            this.txtExpression.Size = new System.Drawing.Size(150, 21);
            this.txtExpression.TabIndex = 34;
            // 
            // txtElec
            // 
            this.txtElec.Location = new System.Drawing.Point(158, 209);
            this.txtElec.Name = "txtElec";
            this.txtElec.Size = new System.Drawing.Size(150, 21);
            this.txtElec.TabIndex = 33;
            // 
            // txtIntfc
            // 
            this.txtIntfc.Location = new System.Drawing.Point(158, 168);
            this.txtIntfc.Name = "txtIntfc";
            this.txtIntfc.Size = new System.Drawing.Size(150, 21);
            this.txtIntfc.TabIndex = 32;
            // 
            // txtCode
            // 
            this.txtCode.Location = new System.Drawing.Point(158, 86);
            this.txtCode.Name = "txtCode";
            this.txtCode.ReadOnly = true;
            this.txtCode.Size = new System.Drawing.Size(150, 21);
            this.txtCode.TabIndex = 31;
            // 
            // label6
            // 
            this.label6.AutoSize = true;
            this.label6.Font = new System.Drawing.Font("宋体", 12F, System.Drawing.FontStyle.Regular, System.Drawing.GraphicsUnit.Point, ((byte)(134)));
            this.label6.Location = new System.Drawing.Point(34, 251);
            this.label6.Name = "label6";
            this.label6.Size = new System.Drawing.Size(104, 16);
            this.label6.TabIndex = 30;
            this.label6.Text = "正则表达式：";
            // 
            // label5
            // 
            this.label5.AutoSize = true;
            this.label5.Font = new System.Drawing.Font("宋体", 12F, System.Drawing.FontStyle.Regular, System.Drawing.GraphicsUnit.Point, ((byte)(134)));
            this.label5.Location = new System.Drawing.Point(34, 211);
            this.label5.Name = "label5";
            this.label5.Size = new System.Drawing.Size(88, 16);
            this.label5.TabIndex = 29;
            this.label5.Text = "电气参数：";
            // 
            // label4
            // 
            this.label4.AutoSize = true;
            this.label4.Font = new System.Drawing.Font("宋体", 12F, System.Drawing.FontStyle.Regular, System.Drawing.GraphicsUnit.Point, ((byte)(134)));
            this.label4.Location = new System.Drawing.Point(34, 171);
            this.label4.Name = "label4";
            this.label4.Size = new System.Drawing.Size(88, 16);
            this.label4.TabIndex = 28;
            this.label4.Text = "接口形式：";
            // 
            // label3
            // 
            this.label3.AutoSize = true;
            this.label3.Font = new System.Drawing.Font("宋体", 12F, System.Drawing.FontStyle.Regular, System.Drawing.GraphicsUnit.Point, ((byte)(134)));
            this.label3.Location = new System.Drawing.Point(34, 131);
            this.label3.Name = "label3";
            this.label3.Size = new System.Drawing.Size(56, 16);
            this.label3.TabIndex = 27;
            this.label3.Text = "名称：";
            // 
            // label2
            // 
            this.label2.AutoSize = true;
            this.label2.Font = new System.Drawing.Font("宋体", 12F, System.Drawing.FontStyle.Regular, System.Drawing.GraphicsUnit.Point, ((byte)(134)));
            this.label2.Location = new System.Drawing.Point(34, 91);
            this.label2.Name = "label2";
            this.label2.Size = new System.Drawing.Size(56, 16);
            this.label2.TabIndex = 26;
            this.label2.Text = "编码：";
            // 
            // label1
            // 
            this.label1.AutoSize = true;
            this.label1.Font = new System.Drawing.Font("宋体", 21.75F, System.Drawing.FontStyle.Regular, System.Drawing.GraphicsUnit.Point, ((byte)(134)));
            this.label1.Location = new System.Drawing.Point(103, 22);
            this.label1.Name = "label1";
            this.label1.Size = new System.Drawing.Size(129, 29);
            this.label1.TabIndex = 25;
            this.label1.Text = "修改界面";
            // 
            // txtProtocol
            // 
            this.txtProtocol.Location = new System.Drawing.Point(158, 290);
            this.txtProtocol.Name = "txtProtocol";
            this.txtProtocol.Size = new System.Drawing.Size(150, 21);
            this.txtProtocol.TabIndex = 38;
            // 
            // label7
            // 
            this.label7.AutoSize = true;
            this.label7.Font = new System.Drawing.Font("宋体", 12F, System.Drawing.FontStyle.Regular, System.Drawing.GraphicsUnit.Point, ((byte)(134)));
            this.label7.Location = new System.Drawing.Point(34, 291);
            this.label7.Name = "label7";
            this.label7.Size = new System.Drawing.Size(72, 16);
            this.label7.TabIndex = 37;
            this.label7.Text = "值含义：";
            // 
            // modifyDeviceInfo
            // 
            this.AutoScaleDimensions = new System.Drawing.SizeF(6F, 12F);
            this.AutoScaleMode = System.Windows.Forms.AutoScaleMode.Font;
            this.ClientSize = new System.Drawing.Size(343, 346);
            this.Controls.Add(this.txtProtocol);
            this.Controls.Add(this.label7);
            this.Controls.Add(this.txtName);
            this.Controls.Add(this.btnAdd);
            this.Controls.Add(this.txtExpression);
            this.Controls.Add(this.txtElec);
            this.Controls.Add(this.txtIntfc);
            this.Controls.Add(this.txtCode);
            this.Controls.Add(this.label6);
            this.Controls.Add(this.label5);
            this.Controls.Add(this.label4);
            this.Controls.Add(this.label3);
            this.Controls.Add(this.label2);
            this.Controls.Add(this.label1);
            this.FormBorderStyle = System.Windows.Forms.FormBorderStyle.FixedToolWindow;
            this.Name = "modifyDeviceInfo";
            this.StartPosition = System.Windows.Forms.FormStartPosition.CenterScreen;
            this.Text = "设备修改界面";
            this.Load += new System.EventHandler(this.modifyDeviceInfo_Load);
            this.ResumeLayout(false);
            this.PerformLayout();

        }

        #endregion

        private System.Windows.Forms.TextBox txtName;
        private System.Windows.Forms.Button btnAdd;
        private System.Windows.Forms.TextBox txtExpression;
        private System.Windows.Forms.TextBox txtElec;
        private System.Windows.Forms.TextBox txtIntfc;
        private System.Windows.Forms.TextBox txtCode;
        private System.Windows.Forms.Label label6;
        private System.Windows.Forms.Label label5;
        private System.Windows.Forms.Label label4;
        private System.Windows.Forms.Label label3;
        private System.Windows.Forms.Label label2;
        private System.Windows.Forms.Label label1;
        private System.Windows.Forms.TextBox txtProtocol;
        private System.Windows.Forms.Label label7;
    }
}
