# Supplementary material
Source: MDPI journal article supplement (https://www.mdpi.com/2077-1312/10/8/1051)
Supplement: s1 [file s1 › DMS/DMS/modifyMjbInfo.cs]

using System;
using System.Collections.Generic;
using System.ComponentModel;
using System.Data;
using System.Drawing;
using System.Linq;
using System.Text;
using System.Windows.Forms;

namespace DMS
{
    public partial class modifyMjbInfo : Form
    {
        string table;
        string code;//用于传递选中的接驳盒的编码信息
        string type;
        string IP;
        string Port;
        string ChlNum;
        jbInfo f;
        string searchCode;
        public modifyMjbInfo(string str1, string str2, string str3, string str4, string str5, string str6, jbInfo exp,string str7)
        {
            InitializeComponent();
            table = str1;
            code = str2;//用于传递选中的接驳盒的编码信息
            type = str3;
            IP = str4;
            Port = str5;
            ChlNum = str6;
            f = exp;
            searchCode = str7;
        }
        /// <summary>
        /// 修改界面加载
        /// </summary>
        /// <param name="sender"></param>
        /// <param name="e"></param>
        private void modifyMjbInfo_Load(object sender, EventArgs e)
        {
            //修改界面默认加载
            try 
            {
                string sql = "select "+code+", "+type+", "+IP+", "+Port+", "+ChlNum+" from "+table+" where "+code+" = '" + searchCode + "'";
                DataTable tTable2 = SqlHelper.ExecuteDataTable(sql);
                DataView dv2 = tTable2.DefaultView;
                DataTable tempTable2 = dv2.ToTable();


                DataRow row2 = tempTable2.Rows[0];


                txtCode.Text = Convert.ToString(row2[code].ToString().Trim());
                txtType.Text = Convert.ToString(row2[type].ToString().Trim());
                txtIP.Text = Convert.ToString(row2[IP].ToString().Trim());
                txtPort.Text = Convert.ToString(row2[Port].ToString().Trim());
                txtChlNum.Text = Convert.ToString(row2[ChlNum].ToString().Trim());
                

            }
            catch(Exception exp)
            {
                MessageBox.Show("修改主接驳盒信息表出现异常！"+exp.Message);
            }
        }
        /// <summary>
        /// 修改数据
        /// </summary>
        /// <param name="sender"></param>
        /// <param name="e"></param>
        private void btnAdd_Click(object sender, EventArgs e)
        {
            try 
            {
                //1.获取主界面上的接驳盒类型，IP地址，端口，通道数目等数据
                string jbCode1 = txtCode.Text.ToString();
                string jbType = txtType.Text.ToString();
                string jbIP = txtIP.Text.ToString();
                string jbPort = txtPort.Text.ToString();
                string chlNum = txtChlNum.Text.ToString();

                string sql = "update "+table+" set "+type+"='" + jbType+ "' ,"+IP+"='" + jbIP + "', "+Port+"='" + jbPort + "',"+ChlNum+"='" + chlNum+ "', isDelete = '0' where "+code+" = '"+jbCode1+"'";
                SqlHelper.ExecuteNonQuery(sql);

                MessageBox.Show("修改成功！");
                this.Close();
                f.listMjbInfo(f.searchMjbInfo());

            }
            catch(Exception exp)
            {
                MessageBox.Show("修改主接驳盒元数据表出现异常！"+exp.Message);
            }
        }


    }
}
