# Supplementary material
Source: MDPI journal article supplement (https://www.mdpi.com/2077-1312/10/8/1051)
Supplement: s1 [file s1 › DMS/DMS/modifyMjbInfo.Designer.cs]

namespace DMS
{
    partial class modifyMjbInfo
    {
        /// <summary>
        /// Required designer variable.
        /// </summary>
        private System.ComponentModel.IContainer components = null;

        /// <summary>
        /// Clean up any resources being used.
        /// </summary>
        /// <param name="disposing">true if managed resources should be disposed; otherwise, false.</param>
        protected override void Dispose(bool disposing)
        {
            if (disposing && (components != null))
            {
                components.Dispose();
            }
            base.Dispose(disposing);
        }

        #region Windows Form Designer generated code

        /// <summary>
        /// Required method for Designer support - do not modify
        /// the contents of this method with the code editor.
        /// </summary>
        private void InitializeComponent()
        {
            this.btnAdd = new System.Windows.Forms.Button();
            this.txtType = new System.Windows.Forms.ComboBox();
            this.txtChlNum = new System.Windows.Forms.TextBox();
            this.txtPort = new System.Windows.Forms.TextBox();
            this.txtIP = new System.Windows.Forms.TextBox();
            this.txtCode = new System.Windows.Forms.TextBox();
            this.label6 = new System.Windows.Forms.Label();
            this.label5 = new System.Windows.Forms.Label();
            this.label4 = new System.Windows.Forms.Label();
            this.label3 = new System.Windows.Forms.Label();
            this.label2 = new System.Windows.Forms.Label();
            this.label1 = new System.Windows.Forms.Label();
            this.SuspendLayout();
            // 
            // btnAdd
            // 
            this.btnAdd.Location = new System.Drawing.Point(119, 295);
            this.btnAdd.Name = "btnAdd";
            this.btnAdd.Size = new System.Drawing.Size(75, 23);
            this.btnAdd.TabIndex = 23;
            this.btnAdd.Text = "修改";
            this.btnAdd.UseVisualStyleBackColor = true;
            this.btnAdd.Click += new System.EventHandler(this.btnAdd_Click);
            // 
            // txtType
            // 
            this.txtType.FormattingEnabled = true;
            this.txtType.Items.AddRange(new object[] {
            "主接驳盒",
            "次接驳盒",
            "数据采集器",
            "设备"});
            this.txtType.Location = new System.Drawing.Point(158, 125);
            this.txtType.Name = "txtType";
            this.txtType.Size = new System.Drawing.Size(100, 20);
            this.txtType.TabIndex = 22;
            // 
            // txtChlNum
            // 
            this.txtChlNum.Location = new System.Drawing.Point(158, 247);
            this.txtChlNum.Name = "txtChlNum";
            this.txtChlNum.Size = new System.Drawing.Size(100, 21);
            this.txtChlNum.TabIndex = 21;
            // 
            // txtPort
            // 
            this.txtPort.Location = new System.Drawing.Point(158, 206);
            this.txtPort.Name = "txtPort";
            this.txtPort.Size = new System.Drawing.Size(100, 21);
            this.txtPort.TabIndex = 20;
            // 
            // txtIP
            // 
            this.txtIP.Location = new System.Drawing.Point(158, 165);
            this.txtIP.Name = "txtIP";
            this.txtIP.Size = new System.Drawing.Size(100, 21);
            this.txtIP.TabIndex = 19;
            // 
            // txtCode
            // 
            this.txtCode.Location = new System.Drawing.Point(158, 84);
            this.txtCode.Name = "txtCode";
            this.txtCode.ReadOnly = true;
            this.txtCode.Size = new System.Drawing.Size(100, 21);
            this.txtCode.TabIndex = 18;
            // 
            // label6
            // 
            this.label6.AutoSize = true;
            this.label6.Font = new System.Drawing.Font("宋体", 12F, System.Drawing.FontStyle.Regular, System.Drawing.GraphicsUnit.Point, ((byte)(134)));
            this.label6.Location = new System.Drawing.Point(64, 249);
            this.label6.Name = "label6";
            this.label6.Size = new System.Drawing.Size(88, 16);
            this.label6.TabIndex = 17;
            this.label6.Text = "通道数目：";
            // 
            // label5
            // 
            this.label5.AutoSize = true;
            this.label5.Font = new System.Drawing.Font("宋体", 12F, System.Drawing.FontStyle.Regular, System.Drawing.GraphicsUnit.Point, ((byte)(134)));
            this.label5.Location = new System.Drawing.Point(64, 209);
            this.label5.Name = "label5";
            this.label5.Size = new System.Drawing.Size(56, 16);
            this.label5.TabIndex = 16;
            this.label5.Text = "端口：";
            // 
            // label4
            // 
            this.label4.AutoSize = true;
            this.label4.Font = new System.Drawing.Font("宋体", 12F, System.Drawing.FontStyle.Regular, System.Drawing.GraphicsUnit.Point, ((byte)(134)));
            this.label4.Location = new System.Drawing.Point(64, 169);
            this.label4.Name = "label4";
            this.label4.Size = new System.Drawing.Size(40, 16);
            this.label4.TabIndex = 15;
            this.label4.Text = "IP：";
            // 
            // label3
            // 
            this.label3.AutoSize = true;
            this.label3.Font = new System.Drawing.Font("宋体", 12F, System.Drawing.FontStyle.Regular, System.Drawing.GraphicsUnit.Point, ((byte)(134)));
            this.label3.Location = new System.Drawing.Point(64, 129);
            this.label3.Name = "label3";
            this.label3.Size = new System.Drawing.Size(56, 16);
            this.label3.TabIndex = 14;
            this.label3.Text = "类型：";
            // 
            // label2
            // 
            this.label2.AutoSize = true;
            this.label2.Font = new System.Drawing.Font("宋体", 12F, System.Drawing.FontStyle.Regular, System.Drawing.GraphicsUnit.Point, ((byte)(134)));
            this.label2.Location = new System.Drawing.Point(64, 89);
            this.label2.Name = "label2";
            this.label2.Size = new System.Drawing.Size(56, 16);
            this.label2.TabIndex = 13;
            this.label2.Text = "编码：";
            // 
            // label1
            // 
            this.label1.AutoSize = true;
            this.label1.Font = new System.Drawing.Font("宋体", 21.75F, System.Drawing.FontStyle.Regular, System.Drawing.GraphicsUnit.Point, ((byte)(134)));
            this.label1.Location = new System.Drawing.Point(103, 20);
            this.label1.Name = "label1";
            this.label1.Size = new System.Drawing.Size(129, 29);
            this.label1.TabIndex = 12;
            this.label1.Text = "修改界面";
            // 
            // modifyMjbInfo
            // 
            this.AutoScaleDimensions = new System.Drawing.SizeF(6F, 12F);
            this.AutoScaleMode = System.Windows.Forms.AutoScaleMode.Font;
            this.ClientSize = new System.Drawing.Size(343, 338);
            this.Controls.Add(this.btnAdd);
            this.Controls.Add(this.txtType);
            this.Controls.Add(this.txtChlNum);
            this.Controls.Add(this.txtPort);
            this.Controls.Add(this.txtIP);
            this.Controls.Add(this.txtCode);
            this.Controls.Add(this.label6);
            this.Controls.Add(this.label5);
            this.Controls.Add(this.label4);
            this.Controls.Add(this.label3);
            this.Controls.Add(this.label2);
            this.Controls.Add(this.label1);
            this.FormBorderStyle = System.Windows.Forms.FormBorderStyle.FixedToolWindow;
            this.Name = "modifyMjbInfo";
            this.StartPosition = System.Windows.Forms.FormStartPosition.CenterScreen;
            this.Text = "修改界面";
            this.Load += new System.EventHandler(this.modifyMjbInfo_Load);
            this.ResumeLayout(false);
            this.PerformLayout();

        }

        #endregion

        private System.Windows.Forms.Button btnAdd;
        private System.Windows.Forms.ComboBox txtType;
        private System.Windows.Forms.TextBox txtChlNum;
        private System.Windows.Forms.TextBox txtPort;
        private System.Windows.Forms.TextBox txtIP;
        private System.Windows.Forms.TextBox txtCode;
        private System.Windows.Forms.Label label6;
        private System.Windows.Forms.Label label5;
        private System.Windows.Forms.Label label4;
        private System.Windows.Forms.Label label3;
        private System.Windows.Forms.Label label2;
        private System.Windows.Forms.Label label1;
    }
}
