# Supplementary material
Source: MDPI journal article supplement (https://www.mdpi.com/2077-1312/10/8/1051)
Supplement: s1 [file s1 › DMS/DMS/NodeManagement.Designer.cs]

namespace DMS
{
    partial class NodeManagement
    {
        /// <summary>
        /// Required designer variable.
        /// </summary>
        private System.ComponentModel.IContainer components = null;

        /// <summary>
        /// Clean up any resources being used.
        /// </summary>
        /// <param name="disposing">true if managed resources should be disposed; otherwise, false.</param>
        protected override void Dispose(bool disposing)
        {
            if (disposing && (components != null))
            {
                components.Dispose();
            }
            base.Dispose(disposing);
        }

        #region Windows Form Designer generated code

        /// <summary>
        /// Required method for Designer support - do not modify
        /// the contents of this method with the code editor.
        /// </summary>
        private void InitializeComponent()
        {
            this.label1 = new System.Windows.Forms.Label();
            this.nodeList = new System.Windows.Forms.ComboBox();
            this.label2 = new System.Windows.Forms.Label();
            this.parentNode = new System.Windows.Forms.TextBox();
            this.label3 = new System.Windows.Forms.Label();
            this.chl = new System.Windows.Forms.TextBox();
            this.button1 = new System.Windows.Forms.Button();
            this.SuspendLayout();
            // 
            // label1
            // 
            this.label1.AutoSize = true;
            this.label1.Location = new System.Drawing.Point(3, 31);
            this.label1.Name = "label1";
            this.label1.Size = new System.Drawing.Size(65, 12);
            this.label1.TabIndex = 0;
            this.label1.Text = "节点选择：";
            // 
            // nodeList
            // 
            this.nodeList.DropDownStyle = System.Windows.Forms.ComboBoxStyle.DropDownList;
            this.nodeList.FormattingEnabled = true;
            this.nodeList.Location = new System.Drawing.Point(60, 27);
            this.nodeList.Name = "nodeList";
            this.nodeList.Size = new System.Drawing.Size(121, 20);
            this.nodeList.TabIndex = 1;
            // 
            // label2
            // 
            this.label2.AutoSize = true;
            this.label2.Location = new System.Drawing.Point(187, 31);
            this.label2.Name = "label2";
            this.label2.Size = new System.Drawing.Size(53, 12);
            this.label2.TabIndex = 2;
            this.label2.Text = "父节点：";
            // 
            // parentNode
            // 
            this.parentNode.Location = new System.Drawing.Point(237, 27);
            this.parentNode.Name = "parentNode";
            this.parentNode.ReadOnly = true;
            this.parentNode.Size = new System.Drawing.Size(100, 21);
            this.parentNode.TabIndex = 3;
            // 
            // label3
            // 
            this.label3.AutoSize = true;
            this.label3.Location = new System.Drawing.Point(343, 31);
            this.label3.Name = "label3";
            this.label3.Size = new System.Drawing.Size(65, 12);
            this.label3.TabIndex = 4;
            this.label3.Text = "关联通道：";
            // 
            // chl
            // 
            this.chl.Location = new System.Drawing.Point(404, 27);
            this.chl.Name = "chl";
            this.chl.ReadOnly = true;
            this.chl.Size = new System.Drawing.Size(100, 21);
            this.chl.TabIndex = 5;
            // 
            // button1
            // 
            this.button1.Location = new System.Drawing.Point(513, 26);
            this.button1.Name = "button1";
            this.button1.Size = new System.Drawing.Size(75, 23);
            this.button1.TabIndex = 6;
            this.button1.Text = "添加";
            this.button1.UseVisualStyleBackColor = true;
            this.button1.Click += new System.EventHandler(this.button1_Click);
            // 
            // NodeManagement
            // 
            this.AutoScaleDimensions = new System.Drawing.SizeF(6F, 12F);
            this.AutoScaleMode = System.Windows.Forms.AutoScaleMode.Font;
            this.ClientSize = new System.Drawing.Size(600, 72);
            this.Controls.Add(this.button1);
            this.Controls.Add(this.chl);
            this.Controls.Add(this.label3);
            this.Controls.Add(this.parentNode);
            this.Controls.Add(this.label2);
            this.Controls.Add(this.nodeList);
            this.Controls.Add(this.label1);
            this.FormBorderStyle = System.Windows.Forms.FormBorderStyle.FixedToolWindow;
            this.Name = "NodeManagement";
            this.StartPosition = System.Windows.Forms.FormStartPosition.CenterScreen;
            this.Text = "节点管理";
            this.Load += new System.EventHandler(this.NodeManagement_Load);
            this.ResumeLayout(false);
            this.PerformLayout();

        }

        #endregion

        private System.Windows.Forms.Label label1;
        private System.Windows.Forms.ComboBox nodeList;
        private System.Windows.Forms.Label label2;
        private System.Windows.Forms.TextBox parentNode;
        private System.Windows.Forms.Label label3;
        private System.Windows.Forms.TextBox chl;
        private System.Windows.Forms.Button button1;
    }
}
