# Supplementary material
Source: MDPI journal article supplement (https://www.mdpi.com/2077-1312/10/8/1051)
Supplement: s1 [file s1 › DMS/DMS/obj/x86/Debug/DMS.csproj.FileListAbsolute.txt]

F:\1.Project\7.移动观测平台\1.学术成果\8.设备动态管理软件著作权\DMS\DMS\bin\Debug\DMS.exe
F:\1.Project\7.移动观测平台\1.学术成果\8.设备动态管理软件著作权\DMS\DMS\bin\Debug\DMS.pdb
F:\1.Project\7.移动观测平台\1.学术成果\8.设备动态管理软件著作权\DMS\DMS\obj\x86\Debug\DMS.Properties.Resources.resources
F:\1.Project\7.移动观测平台\1.学术成果\8.设备动态管理软件著作权\DMS\DMS\obj\x86\Debug\DMS.csproj.GenerateResource.Cache
F:\1.Project\7.移动观测平台\1.学术成果\8.设备动态管理软件著作权\DMS\DMS\obj\x86\Debug\DMS.exe
F:\1.Project\7.移动观测平台\1.学术成果\8.设备动态管理软件著作权\DMS\DMS\obj\x86\Debug\DMS.pdb
F:\1.Project\7.移动观测平台\1.学术成果\8.设备动态管理软件著作权\DMS\DMS\obj\x86\Debug\DMS.csprojResolveAssemblyReference.cache
F:\1.Project\7.移动观测平台\1.学术成果\8.设备动态管理软件著作权\DMS\DMS\obj\x86\Debug\DMS.Main.resources
F:\1.Project\7.移动观测平台\1.学术成果\8.设备动态管理软件著作权\DMS\DMS\obj\x86\Debug\DMS.jbInfo.resources
F:\1.Project\7.移动观测平台\1.学术成果\8.设备动态管理软件著作权\DMS\DMS\obj\x86\Debug\DMS.addMjbInfo.resources
F:\1.Project\7.移动观测平台\1.学术成果\8.设备动态管理软件著作权\DMS\DMS\obj\x86\Debug\DMS.modifyMjbInfo.resources
F:\1.Project\7.移动观测平台\1.学术成果\8.设备动态管理软件著作权\DMS\DMS\obj\x86\Debug\DMS.deviceInfo.resources
F:\1.Project\7.移动观测平台\1.学术成果\8.设备动态管理软件著作权\DMS\DMS\obj\x86\Debug\DMS.addDeviceInfo.resources
F:\1.Project\7.移动观测平台\1.学术成果\8.设备动态管理软件著作权\DMS\DMS\obj\x86\Debug\DMS.modifyDeviceInfo.resources
F:\1.Project\7.移动观测平台\1.学术成果\8.设备动态管理软件著作权\DMS\DMS\obj\x86\Debug\DMS.MjbManagement.resources
F:\1.Project\7.移动观测平台\1.学术成果\8.设备动态管理软件著作权\DMS\DMS\obj\x86\Debug\DMS.NodeManagement.resources
F:\1.Project\7.移动观测平台\1.学术成果\8.设备动态管理软件著作权\DMS\DMS\obj\x86\Debug\DMS.GPSInfo.resources
F:\1.Project\7.移动观测平台\1.学术成果\8.设备动态管理软件著作权\DMS\DMS\obj\x86\Debug\DMS.DCDataInfo.resources
F:\1.Project\7.移动观测平台\1.学术成果\9.海底网高水平论文\2.智慧海洋海底观测网远程控制研究\2.SCI期刊论文投稿\4.稿件修改\9.MDPI投稿\8.2022-07-22论文重投后一审\Supplementary Files\DMS\DMS\obj\x86\Debug\DMS.exe
F:\1.Project\7.移动观测平台\1.学术成果\9.海底网高水平论文\2.智慧海洋海底观测网远程控制研究\2.SCI期刊论文投稿\4.稿件修改\9.MDPI投稿\8.2022-07-22论文重投后一审\Supplementary Files\DMS\DMS\obj\x86\Debug\DMS.pdb
F:\1.Project\7.移动观测平台\1.学术成果\9.海底网高水平论文\2.智慧海洋海底观测网远程控制研究\2.SCI期刊论文投稿\4.稿件修改\9.MDPI投稿\8.2022-07-22论文重投后一审\Supplementary Files\DMS\DMS\bin\Debug\DMS.exe
F:\1.Project\7.移动观测平台\1.学术成果\9.海底网高水平论文\2.智慧海洋海底观测网远程控制研究\2.SCI期刊论文投稿\4.稿件修改\9.MDPI投稿\8.2022-07-22论文重投后一审\Supplementary Files\DMS\DMS\bin\Debug\DMS.pdb
F:\1.Project\7.移动观测平台\1.学术成果\9.海底网高水平论文\2.智慧海洋海底观测网远程控制研究\2.SCI期刊论文投稿\4.稿件修改\9.MDPI投稿\8.2022-07-22论文重投后一审\Supplementary Files\DMS\DMS\obj\x86\Debug\DMS.csprojResolveAssemblyReference.cache
F:\1.Project\7.移动观测平台\1.学术成果\9.海底网高水平论文\2.智慧海洋海底观测网远程控制研究\2.SCI期刊论文投稿\4.稿件修改\9.MDPI投稿\8.2022-07-22论文重投后一审\Supplementary Files\DMS\DMS\obj\x86\Debug\DMS.addDeviceInfo.resources
F:\1.Project\7.移动观测平台\1.学术成果\9.海底网高水平论文\2.智慧海洋海底观测网远程控制研究\2.SCI期刊论文投稿\4.稿件修改\9.MDPI投稿\8.2022-07-22论文重投后一审\Supplementary Files\DMS\DMS\obj\x86\Debug\DMS.addMjbInfo.resources
F:\1.Project\7.移动观测平台\1.学术成果\9.海底网高水平论文\2.智慧海洋海底观测网远程控制研究\2.SCI期刊论文投稿\4.稿件修改\9.MDPI投稿\8.2022-07-22论文重投后一审\Supplementary Files\DMS\DMS\obj\x86\Debug\DMS.DCDataInfo.resources
F:\1.Project\7.移动观测平台\1.学术成果\9.海底网高水平论文\2.智慧海洋海底观测网远程控制研究\2.SCI期刊论文投稿\4.稿件修改\9.MDPI投稿\8.2022-07-22论文重投后一审\Supplementary Files\DMS\DMS\obj\x86\Debug\DMS.deviceInfo.resources
F:\1.Project\7.移动观测平台\1.学术成果\9.海底网高水平论文\2.智慧海洋海底观测网远程控制研究\2.SCI期刊论文投稿\4.稿件修改\9.MDPI投稿\8.2022-07-22论文重投后一审\Supplementary Files\DMS\DMS\obj\x86\Debug\DMS.GPSInfo.resources
F:\1.Project\7.移动观测平台\1.学术成果\9.海底网高水平论文\2.智慧海洋海底观测网远程控制研究\2.SCI期刊论文投稿\4.稿件修改\9.MDPI投稿\8.2022-07-22论文重投后一审\Supplementary Files\DMS\DMS\obj\x86\Debug\DMS.jbInfo.resources
F:\1.Project\7.移动观测平台\1.学术成果\9.海底网高水平论文\2.智慧海洋海底观测网远程控制研究\2.SCI期刊论文投稿\4.稿件修改\9.MDPI投稿\8.2022-07-22论文重投后一审\Supplementary Files\DMS\DMS\obj\x86\Debug\DMS.Main.resources
F:\1.Project\7.移动观测平台\1.学术成果\9.海底网高水平论文\2.智慧海洋海底观测网远程控制研究\2.SCI期刊论文投稿\4.稿件修改\9.MDPI投稿\8.2022-07-22论文重投后一审\Supplementary Files\DMS\DMS\obj\x86\Debug\DMS.MjbManagement.resources
F:\1.Project\7.移动观测平台\1.学术成果\9.海底网高水平论文\2.智慧海洋海底观测网远程控制研究\2.SCI期刊论文投稿\4.稿件修改\9.MDPI投稿\8.2022-07-22论文重投后一审\Supplementary Files\DMS\DMS\obj\x86\Debug\DMS.modifyDeviceInfo.resources
F:\1.Project\7.移动观测平台\1.学术成果\9.海底网高水平论文\2.智慧海洋海底观测网远程控制研究\2.SCI期刊论文投稿\4.稿件修改\9.MDPI投稿\8.2022-07-22论文重投后一审\Supplementary Files\DMS\DMS\obj\x86\Debug\DMS.modifyMjbInfo.resources
F:\1.Project\7.移动观测平台\1.学术成果\9.海底网高水平论文\2.智慧海洋海底观测网远程控制研究\2.SCI期刊论文投稿\4.稿件修改\9.MDPI投稿\8.2022-07-22论文重投后一审\Supplementary Files\DMS\DMS\obj\x86\Debug\DMS.NodeManagement.resources
F:\1.Project\7.移动观测平台\1.学术成果\9.海底网高水平论文\2.智慧海洋海底观测网远程控制研究\2.SCI期刊论文投稿\4.稿件修改\9.MDPI投稿\8.2022-07-22论文重投后一审\Supplementary Files\DMS\DMS\obj\x86\Debug\DMS.Properties.Resources.resources
F:\1.Project\7.移动观测平台\1.学术成果\9.海底网高水平论文\2.智慧海洋海底观测网远程控制研究\2.SCI期刊论文投稿\4.稿件修改\9.MDPI投稿\8.2022-07-22论文重投后一审\Supplementary Files\DMS\DMS\obj\x86\Debug\DMS.csproj.GenerateResource.Cache
