# Supplementary material
Source: MDPI journal article supplement (https://www.mdpi.com/2077-1312/10/8/1051)
Supplement: s1 [file s1 › OSNSystem/OSNSystem/OSNSystem.sln]

Microsoft Visual Studio Solution File, Format Version 12.00
# Visual Studio Version 16
VisualStudioVersion = 16.0.32413.511
MinimumVisualStudioVersion = 10.0.40219.1
Project("{FAE04EC0-301F-11D3-BF4B-00C04F79EFBC}") = "OSNSystem", "OSNSystem\OSNSystem.csproj", "{77B601DC-BC42-4E6C-9921-D62670669665}"
EndProject
Global
	GlobalSection(SolutionConfigurationPlatforms) = preSolution
		Debug|x86 = Debug|x86
		Release|x86 = Release|x86
	EndGlobalSection
	GlobalSection(ProjectConfigurationPlatforms) = postSolution
		{77B601DC-BC42-4E6C-9921-D62670669665}.Debug|x86.ActiveCfg = Debug|x86
		{77B601DC-BC42-4E6C-9921-D62670669665}.Debug|x86.Build.0 = Debug|x86
		{77B601DC-BC42-4E6C-9921-D62670669665}.Release|x86.ActiveCfg = Release|x86
		{77B601DC-BC42-4E6C-9921-D62670669665}.Release|x86.Build.0 = Release|x86
	EndGlobalSection
	GlobalSection(SolutionProperties) = preSolution
		HideSolutionNode = FALSE
	EndGlobalSection
	GlobalSection(ExtensibilityGlobals) = postSolution
		SolutionGuid = {10D2AC79-7D61-48F7-8866-5E2E2EB88EE3}
	EndGlobalSection
EndGlobal
