# Supplementary material
Source: MDPI journal article supplement (https://www.mdpi.com/2077-1312/10/8/1051)
Supplement: s1 [file s1 › OSNSystem/OSNSystem/OSNSystem/1MySerClass3.cs]

/*
 * 时间：2021年2月25日09:39:22
 * 功能：典型socket服务器建立过程，主要功能：1)开始侦听；2)接收客户端的连接；
 * 主要是监听高压舱主接驳盒的连接，使用端口8082进行监听
 */
using System;
using System.Collections.Generic;
using System.Linq;
using System.Text;
using System.Net.Sockets;
using System.IO;
using System.Windows.Forms;
using System.Net;
using System.Threading;
using System.Text.RegularExpressions;
using System.Drawing;
//using MySql.Data.MySqlClient;
using System.Data;

namespace OSNSystem
{
    class _1MySerClass3
    {
        private Socket tcpListener;//用于监听客户端连接请求       
        private Main f;//将窗体对象定义成该类的私有变量，使用构造函数来初始化该私有变量

        /*****************将远程连接过来的客户端信息，放入userList中，保存连接信息，后期确定从该连接中找到所需的连接发送出去********************/
        public static List<_3ReceieveMsgClass> userList3 = new List<_3ReceieveMsgClass>();


        public static string AJunctionIP;//主接驳盒串口服务器IP地址
        public static int APort;//监听主接驳盒的端口

        private Dictionary<string, string> mydic;

        /// <summary>
        /// 类_1MySerClass3构造函数
        /// </summary>
        /// <param name="frm"></param>
        public _1MySerClass3(Main frm)
        {
            f = frm;
            showIPandPortcallback = new delShowIPandPort(ShowIPandPortMethod);
            mydic = _1MySerClass.SetFaultKeyValue();
        }


        /******************2017.10.25增加项目，接驳盒添加客户端连接窗口的显示*******************/
        private delegate void delShowIPandPort(string IP,string port,int i);
        private delShowIPandPort showIPandPortcallback;
        private void ShowIPandPortMethod(string IP,string port, int i)
        {
            if (i == 1)//次级接驳盒远程连接的信息
            {
                f.txtBIP.Text = IP.Trim();
                f.txtBPort.Text = port.Trim();
            }
            else//主接驳盒远程连接的信息
            {
                f.txtAIP.Text = IP.Trim();
                f.txtAPort.Text = port.Trim();
            }
            
        }


        /// <summary>
        /// 1.开始侦听函数
        /// </summary>
        public void StartListener()
        {
            try
            {          
                DataSet ds = new DataSet();
                ds.ReadXml(@".\LocalIPandPort.xml");
                IPAddress IP = IPAddress.Parse(ds.Tables[0].Rows[0]["srvIP"].ToString());
                int port = Convert.ToInt32(ds.Tables[0].Rows[0]["srvJunctionBoxAPort"].ToString());

                AJunctionIP = ds.Tables[0].Rows[0]["AJunctionIP"].ToString();//将文件中主接驳盒串口服务器IP地址读入
                
                tcpListener = new Socket(AddressFamily.InterNetwork, SocketType.Stream, ProtocolType.Tcp); ;//创建侦听对象
                tcpListener.Bind(new IPEndPoint(IP, port));//绑定IP地址以及端口，开始监听
                tcpListener.Listen(100);//设置可以连接的数目为100个


                Thread threadAccept = new Thread(AcceptClient);
                threadAccept.Start();


            }
            catch (Exception e)
            {             
                LogClass.WriteLogFile("建立本地socket侦听对象出现异常！"+e.Message);
            }


        }

        /// <summary>
        /// 2.接收客户端的连接
        /// </summary>
        private void AcceptClient()
        {
            try
            {
                while (true)
                {
                    Socket tcpClient = tcpListener.Accept();//用在同步阻塞方式下，通过AcceptTcpClient（）函数的返回值区分不同的客户端连接

                    if (tcpClient != null)
                    {

                        _3ReceieveMsgClass receiveMsg = new _3ReceieveMsgClass(tcpClient, f,APort,mydic);//定义_3ReceiveMsgClass的对象，调用构造函数


                        userList3.Add(receiveMsg);//将接受的客户端的连接存储在数组中

                        //客户端的连接，分成主接驳盒以及次接驳盒的连接,不同的连接使用IP地址来区分
                        if (receiveMsg.nodeIP == AJunctionIP)//用于接收主接驳盒的远程连接
                        {
                            f.Invoke(showIPandPortcallback,receiveMsg.nodeIP,receiveMsg.port.ToString(),2);//显示连接的主接驳盒的IP地址以及端口
                        }

                        


                        Thread threadReceiveMessage = new Thread(receiveMsg.ReceiveMessage);//每次得到一个TcpClient对象，就创建一个与该客户对应的线程接收信息
                        threadReceiveMessage.Start();


                    }

                    Main.ClearMemory();

                }
            }
            catch (Exception e)
            {
                Main.ClearMemory();
                LogClass.WriteLogFile("接收客户端连接线程出现异常！" + e.Message);
            }

        }


        ///*******************************额外用到的一些函数***************************/

        ///// <summary>
        ///// 自动获取本机IP地址，额外函数
        ///// </summary>
        ///// <returns></returns>
        private IPAddress getIP()
        {
            string AddressIP = string.Empty;
            try
            {
                foreach (IPAddress _IPAddress in Dns.GetHostEntry(Dns.GetHostName()).AddressList)
                {
                    if (_IPAddress.AddressFamily.ToString() == "InterNetwork")
                    {
                        AddressIP = _IPAddress.ToString();//"127.0.0.1";
                    }
                }
                return IPAddress.Parse(AddressIP);
            }
            catch (Exception e)
            {
                LogClass.WriteLogFile("自动获取本机IP地址异常！" + e.Message);
                return null;
            }

        }
    }
}
