# Supplementary material
Source: MDPI journal article supplement (https://www.mdpi.com/2077-1312/10/8/1051)
Supplement: s1 [file s1 › OSNSystem/OSNSystem/OSNSystem/4MyClientClass3.cs]

/*
 * 时间：2021年10月5日14:58:52
 * 功能：接收云服务器的远程控制指令，然后向数据采集器转发控制指令
 */
using System;
using System.Collections.Generic;
using System.Linq;
using System.Text;
using System.Net.Sockets;
using System.Net;
using System.Data;

namespace OSNSystem
{
    class _4MyClientClass3
    {
        //public static int sendNum;//数据采集器发送的数据个数
        private Main f;


        ////数据采集器界面发送数据个数的委托回调显示
        //private delegate void delShowSendNum();
        //private delShowSendNum showSendNumcallback;
        //private void ShowSendNumMethod()
        //{
        //    f.canSendNum.Text = sendNum.ToString();
        //}

        /// <summary>
        /// 构造函数
        /// </summary>
        public _4MyClientClass3(Main frm)
        {
            f = frm;
            //showSendNumcallback = new delShowSendNum(ShowSendNumMethod);
        }


        public Socket tcpClient;//上位机给下位机发送数据,socket客户端

        /// <summary>
        /// 1作为客户端，总的给服务器发送数据的方式
        /// </summary>
        /// <returns></returns>
        public bool ExecuteCmd(string cmd, int i,int serial)
        {
            try
            {
                if (ConnectToServer(serial) == true)//1.连接服务器成功之后
                {
                    if (SendMessage(cmd, i) == 1)//2.发送相应指令,SendMessage()函数包含重发机制
                    {
                        Disconnect();
                        return true;
                    }
                    else
                    {
                        Disconnect();//断开现有连接
                        return false;
                    }
                }
                else
                {
                    //MessageBox.Show("连接失败！");
                    Disconnect();//关闭现有连接
                    return false;
                }

            }
            catch (Exception exp)
            {
                //MessageBox.Show("执行异常！" + exp.Message);
                Disconnect();//关闭现有连接
                return false;
            }
        }


        /// <summary>
        /// 1.1上位机作为客户端主动连接socket服务器（上位机给下位机发送指令使用）
        /// </summary>
        /// <returns></returns>
        public bool ConnectToServer( int serial)
        {
            try
            {
                tcpClient = new Socket(AddressFamily.InterNetwork, SocketType.Stream, ProtocolType.Tcp);//1.初始化客户端，创建客户端对象
                string IP;
                int port;
                IPAddress clientIP;
                //2.更新本地变量,从配置文件中读取下位机的IP地址以及端口
                if (serial == 1)//如果数据采集器为第1个数据采集器，则下发指令时上位机作为客户端连接第一个数据采集器的服务器
                {
                    DataSet ds = new DataSet();
                    ds.ReadXml(@".\IPandPortConfig.xml");
                    IP = ds.Tables[0].Rows[0]["srvIP"].ToString();
                    port = Convert.ToInt32(ds.Tables[0].Rows[0]["srvPort"].ToString());
                    clientIP = IPAddress.Parse(IP);
                    tcpClient.Connect(clientIP, port);//3.使用Connect方法与服务器建立连接
                }
                else if(serial == 2)//如果数据采集器为第2个数据采集器，则下发指令给第2个数据采集器发送指令
                {
                    DataSet ds = new DataSet();
                    ds.ReadXml(@".\IPandPortConfig2.xml");
                    IP = ds.Tables[0].Rows[0]["srvIP"].ToString();
                    port = Convert.ToInt32(ds.Tables[0].Rows[0]["srvPort"].ToString());
                    clientIP = IPAddress.Parse(IP);
                    tcpClient.Connect(clientIP,port);
                }
                

                

                DateTime nowtime = DateTime.Now;//4.间歇延时
                while (nowtime.AddSeconds(1) > DateTime.Now)
                { }

                if (tcpClient != null)
                {
                    return true;
                }

                return false;
            }
            catch
            {
                return false;
            }
        }
      
        /// <summary>
        /// 1.2.给水下控制板服务器发送数据（包含重发机制）（上位机给下位机发送指令使用）
        /// </summary>
        /// <param name="msg"></param>
        /// <param name="i"></param>i=1，发送的是对应的十六进制数;i=2，发送的是对应的字符串
        /// <returns></returns>发送成功，返回1；发送失败，返回0
        public int SendMessage(string msg, int i)
        {
            try
            {

                if (i == 1)//i=1，发送的是对应的十六机制数
                {
                    tcpClient.Send(StrToHexByte(msg));//第一次发送指令

                    //sendNum++;//每发送完一次指令，将发送个数增加1次
                    //f.Invoke(showSendNumcallback, null);

                    

                    if (ReceiveMessage().Trim() == dealFeedBackMessage(msg))
                    {
                        //MessageBox.Show("执行成功！");
                        return 1;
                    }

                    else
                    {

                        tcpClient.Send(StrToHexByte(msg));//第一次重发指令

                        //sendNum++;//每发送完一次指令，将发送个数增加1次
                        //f.Invoke(showSendNumcallback, null);


                        if (ReceiveMessage().Trim() == dealFeedBackMessage(msg))
                        {
                            //MessageBox.Show("执行成功！");
                            return 1;
                        }
                        else
                        {
                            tcpClient.Send(StrToHexByte(msg));//第二次重发指令

                            //sendNum++;//每发送完一次指令，将发送个数增加1次
                            //f.Invoke(showSendNumcallback, null);

                            if (ReceiveMessage().Trim() == dealFeedBackMessage(msg))
                            {
                               // MessageBox.Show("执行成功！");
                                return 1;
                            }
                            else
                            {
                                //MessageBox.Show("执行失败！");
                                return 0;
                            }

                        }
                    }
                }
                else//i不等于1发送的是对应的字符串
                {
                    tcpClient.Send(Encoding.ASCII.GetBytes(msg));//第一次发送指令

                    //sendNum++;//每发送完一次指令，将发送个数增加1次
                    //f.Invoke(showSendNumcallback, null);


                    string tempmessage = dealFeedBackMessage(msg);

                    string recvMesg = ReceiveMessage().Trim();

                    if (recvMesg == tempmessage)
                    {
                        //MessageBox.Show("执行成功！");
                        return 1;
                    }

                    else
                    {

                        tcpClient.Send(Encoding.ASCII.GetBytes(msg));//第一次重发指令

                        if (ReceiveMessage().Trim() == tempmessage)
                        {
                            //MessageBox.Show("执行成功！");
                            return 1;
                        }
                        else
                        {
                            tcpClient.Send(Encoding.ASCII.GetBytes(msg));//第二次重发指令
                            {
                                if (ReceiveMessage().Trim() == tempmessage)
                                {
                                    //MessageBox.Show("执行成功！");
                                    return 1;
                                }
                                else
                                {
                                    //MessageBox.Show("执行失败！");
                                    return 0;
                                }
                            }
                        }
                    }

                    //if (msg == "#A0102\r\n")//为叶绿素浊度传感器专门增加的指令判定
                    //{
                    //    string receMsg = ReceiveMessage().Trim();//通过网口接收到的信息存储在临时变量中，否则后面判断的时候需要多次执行ReceiveMessage()函数，该函数是一个时间阻塞函数，发送一次指令，就只执行一次接收等待的函数
                    //    //函数后缀加了trim()函数，则会默认将回车换行过滤掉

                    //    if (receMsg == "#A0102@OK" || receMsg == "#A0102@Error")//第一次发送完指令之后判断接收到的反馈是不是电刷动作之后的反馈
                    //    {
                    //        // MessageBox.Show("机械电刷正确转动！");
                    //        switch (receMsg)
                    //        {
                    //            case "#A0102@OK":
                    //                MessageBox.Show("执行成功!");
                    //                break;
                    //            case "#A0102@Error":
                    //                MessageBox.Show("机械电刷故障！");
                    //                break;
                    //        }
                    //        return 1;
                    //    }
                    //    else
                    //    {
                    //        tcpClient.Send(Encoding.ASCII.GetBytes(msg));//第一次重发送指令


                    //        sendNum++;//每发送完一次指令，将发送个数增加1次
                    //        f.Invoke(showSendNumcallback, null);


                    //        receMsg = ReceiveMessage().Trim();
                    //        if (receMsg == "#A0102@OK" || receMsg == "#A0102@Error")//第一次发送完指令之后判断接收到的反馈是不是电刷动作之后的反馈
                    //        {
                    //            switch (receMsg)
                    //            {
                    //                case "#A0102@OK":
                    //                    MessageBox.Show("执行成功！");
                    //                    break;
                    //                case "#A0102@Error":
                    //                    MessageBox.Show("机械电刷故障！");
                    //                    break;
                    //            }
                    //            return 1;
                    //        }
                    //        else
                    //        {
                    //            tcpClient.Send(Encoding.ASCII.GetBytes(msg));//第二次重发送指令


                    //            sendNum++;//每发送完一次指令，将发送个数增加1次
                    //            f.Invoke(showSendNumcallback, null);


                    //            receMsg = ReceiveMessage().Trim();

                    //            if (receMsg == "#A0102@OK" || receMsg == "#A0102@Error")//第一次发送完指令之后判断接收到的反馈是不是电刷动作之后的反馈
                    //            {
                    //                switch (receMsg)
                    //                {
                    //                    case "#A0102@OK":
                    //                        MessageBox.Show("执行成功！");
                    //                        break;
                    //                    case "#A0102@Error":
                    //                        MessageBox.Show("机械电刷故障！");
                    //                        break;
                    //                }
                    //                return 1;
                    //            }
                    //            else
                    //            {
                    //                MessageBox.Show("执行失败！");
                    //                return 0;
                    //            }
                    //        }
                    //    }
                    //}
                    //else//其它不是叶绿素浊度传感器的指令判定仍旧与原先相同
                    //{
                    //    string tempmessage = dealFeedBackMessage(msg);
                    //    if (ReceiveMessage().Trim() == tempmessage)
                    //    {
                    //        MessageBox.Show("执行成功！");
                    //        return 1;
                    //    }
                    //    else
                    //    {

                    //        tcpClient.Send(Encoding.ASCII.GetBytes(msg));//第一次重发指令

                    //        sendNum++;//每发送完一次指令，将发送个数增加1次
                    //        f.Invoke(showSendNumcallback, null);

                    //        if (ReceiveMessage().Trim() == tempmessage)
                    //        {
                    //            MessageBox.Show("执行成功！");
                    //            return 1;
                    //        }
                    //        else
                    //        {
                    //            tcpClient.Send(Encoding.ASCII.GetBytes(msg));//第二次重发指令

                    //            sendNum++;//每发送完一次指令，将发送个数增加1次
                    //            f.Invoke(showSendNumcallback, null);

                    //            if (ReceiveMessage().Trim() == tempmessage)
                    //            {
                    //                MessageBox.Show("执行成功！");
                    //                return 1;
                    //            }
                    //            else
                    //            {
                    //                MessageBox.Show("执行失败！");
                    //                return 0;
                    //            }
                    //        }
                    //    }
                    //}
                }
            }
            catch (Exception exp)
            {
                LogClass.WriteLogFile("给下位机发送指令异常！" + exp.Message);
                //MessageBox.Show("执行失败！");
                return 0;
            }
        }

        /// <summary>
        /// 1.3.与下位机服务器建立连接之后，接收下位机服务器发送过来的消息（上位机给下位机发送指令）
        /// </summary>
        /// <returns></returns>
        private string ReceiveMessage()
        {
            tcpClient.ReceiveTimeout = 3000;
            try
            {
                byte[] bytes = new byte[8192];
                int readBytes = 0;

                readBytes = tcpClient.Receive(bytes, 0, 8192, SocketFlags.None);

                string content = null;

                content = Encoding.ASCII.GetString(bytes, 0, readBytes);//这样直接接收到的是字符串信息
                return content;
            }
            catch (SocketException exp)
            {
                //LogClass.WriteLogFile("上位机客户端接收反馈信息异常！"+exp.Message);
                LogClass.WriteLogFile("上位机超时没有接到反馈！" + exp.Message);
                return "1";//注意当出现超时接收异常时不能返回NULL，返回NULL之后，求解.trim()出现新的异常，导致不能重发
            }
        }

        /// <summary>
        ///1.4.关闭现有连接，与下位机的客户端连接
        /// </summary>
        public void Disconnect()
        {

            if (tcpClient != null)
            {
                tcpClient.Close();
            }
        }


        /***********额外添加的用于处理发送数据格式的中间函数*********************/
        /// <summary>
        /// 将十六进制字符串转换成字节类型存储在数组中
        /// </summary>
        /// <param name="val"></param>
        /// <returns></returns>
        private byte[] StrToHexByte(string val)
        {
            byte[] bytes = new byte[val.Length / 2];

            for (int i = 0; i < bytes.Length; i++)
            {
                bytes[i] = Convert.ToByte(val.Substring(i * 2, 2), 16);
            }
            return bytes;
        }


        /// <summary>
        /// 发送指令后对应的反馈信息--优化，后期放入数据库，方便修改
        /// </summary>
        /// <param name="cmd"></param>
        /// <returns></returns>
        private string dealFeedBackMessage(string cmd)
        {
            string feedBack = null;
            if (cmd.StartsWith("55BB"))
            {
                switch (cmd.Substring(4, 8))
                {
                    case "00013010"://校准时钟
                        feedBack = "$SET TIME OK#";
                        break;
                    case "00013041"://设置数据发送时间间隔
                        feedBack = "$SET DO INT OK#";
                        break;
                    case "00013042":
                        feedBack = "$SET ME INT OK#";
                        break;
                    case "00013043":
                        feedBack = "$SET CH INT OK#";
                        break;
                    case "00013044":
                        feedBack = "$SET TU INT OK#";
                        break;
                    case "00013045":
                        feedBack = "$SET CD INT OK#";
                        break;
                    case "00013046":
                        feedBack = "$SET AD INT OK#";
                        break;
                    case "00013051"://电压电流报警阈值
                        feedBack = "$SET DO LEV OK#";
                        break;
                    case "00013052":
                        feedBack = "$SET ME LEV OK#";
                        break;
                    case "00013053":
                        feedBack = "$SET CH LEV OK#";
                        break;
                    case "00013054":
                        feedBack = "$SET TU LEV OK#";
                        break;
                    case "00013055":
                        feedBack = "$SET CD LEV OK#";
                        break;
                    case "00013056":
                        feedBack = "$SET TL LEV OK#";
                        break;
                    case "00013061"://传感器通道开关控制
                        if (cmd.Substring(32, 2) == "31")
                            feedBack = "$SET DO SW OP#";//打开指令的响应
                        else if (cmd.Substring(32, 2) == "30")
                            feedBack = "$SET DO SW CL#";//关闭指令的响应
                        break;
                    case "00013062":
                        if (cmd.Substring(32, 2) == "31")
                            feedBack = "$SET ME SW OP#";
                        else if (cmd.Substring(32, 2) == "30")
                            feedBack = "$SET ME SW CL#";
                        break;
                    case "00013063":
                        if (cmd.Substring(32, 2) == "31")
                            feedBack = "$SET CH SW OP#";
                        else if (cmd.Substring(32, 2) == "30")
                            feedBack = "$SET CH SW CL#";
                        break;
                    case "00013064":
                        if (cmd.Substring(32, 2) == "31")
                            feedBack = "$SET TU SW OP#";
                        else if (cmd.Substring(32, 2) == "30")
                            feedBack = "$SET TU SW CL#";
                        break;
                    case "00013065":
                        if (cmd.Substring(32, 2) == "31")
                            feedBack = "$SET CD SW OP#";
                        else if (cmd.Substring(32, 2) == "30")
                            feedBack = "$SET CD SW CL#";
                        break;
                }
            }
            else if (Main.mark == 1)//MIO程序未更改，仍旧使用之前的反馈进行指令是否执行成功的反馈
            {
                //switch (cmd.Substring(0, 2))
                //{
                //    case "$D":
                //        feedBack = "$DataADOK#";//溶解氧单次测量指令反馈
                //        break;
                //    case "$S":
                //        feedBack = "$SETDataOK#";//溶解氧多次测量指令反馈
                //        break;
                //    case "$E":
                //        feedBack = "$ErasechipOK#";//溶解氧擦除存储芯片指令反馈
                //        break;
                //    case "$T":
                //        feedBack = "$DO SET TIME OK#";//溶解氧校准时钟反馈
                //        break;
                //}
                switch (cmd)//2020-08-07对应win7版本下MIO控制板程序的指令返回
                {
                    case "$SET+01+SIIM1+Power12V#"://通道1打开指令及相应反馈
                        feedBack = "$SIIM1 Power 12V OK!#";
                        break;
                    case "$SET+01+SIIM1+Close#"://通道1关闭指令及相应反馈
                        feedBack = "$SIIM1 Power Close!#";
                        break;
                    case "$SET+01+SIIM2+Power12V#"://通道2打开指令及相应反馈
                        feedBack = "$SIIM2 Power 12V OK!#";
                        break;
                    case "$SET+01+SIIM2+Close#"://通道2关闭指令及相应反馈
                        feedBack = "$SIIM2 Power Close!#";
                        break;
                    case "$SET+01+SIIM3+Power12V#"://通道3打开指令及相应反馈
                        feedBack = "$SIIM3 Power 12V OK!#";
                        break;
                    case "$SET+01+SIIM3+Close#"://通道3关闭指令及相应反馈
                        feedBack = "$SIIM3 Power Close!#";
                        break;
                    case "$SET+01+SIIM4+Power12V#"://通道4打开指令及相应反馈
                        feedBack = "$SIIM4 Power 12V OK!#";
                        break;
                    case "$SET+01+SIIM4+Close#"://通道4关闭指令及相应反馈
                        feedBack = "$SIIM4 Power Close!#";
                        break;
                    case "$SET+01+SIIM5+Power12V#"://通道5打开指令及相应反馈
                        feedBack = "$SIIM5 Power 12V OK!#";
                        break;
                    case "$SET+01+SIIM5+Close#"://通道5关闭指令及相应反馈
                        feedBack = "$SIIM5 Power Close!#";
                        break;

                }

                if (cmd.Substring(0, 1) == "T")
                    feedBack = "$ok!#";//发送给MIO板的校准时钟指令，并不通过MIO板继续发给下面的AD的采集板
                else if(cmd.Trim()== "#A0104")
                    feedBack = "$ok!#";//发送给叶绿素浊度传感器的急停指令
                else if(cmd.Substring(0,6)== "#A0105")
                    feedBack = "$ok!#";
                else if (cmd.Substring(0, 13) == "$SET+01+CurAH")//通道1电压电流上下限指令的反馈
                    feedBack = "$Set SIIM1 Current and Voltage Alarm Data Interval OK!#";
                else if (cmd.Substring(0, 13) == "$SET+01+CurBH")//通道2电压电流上下限指令的反馈
                    feedBack = "$Set SIIM2 Current and Voltage Alarm Data Interval OK!#";
                else if (cmd.Substring(0, 13) == "$SET+01+CurCH")//通道3电压电流上下限指令的反馈
                    feedBack = "$Set SIIM3 Current and Voltage Alarm Data Interval OK!#";
                else if (cmd.Substring(0, 13) == "$SET+01+CurDH")//通道4电压电流上下限指令的反馈
                    feedBack = "$Set SIIM4 Current and Voltage Alarm Data Interval OK!#";
                else if (cmd.Substring(0, 13) == "$SET+01+CurEH")//通道5电压电流上下限指令的反馈
                    feedBack = "$Set SIIM5 Current and Voltage Alarm Data Interval OK!#";
                else if (cmd.Substring(0, 13) == "$SET+01+TempH")//设置温度上下限指令的反馈
                    feedBack = "$Set Control Cabin Temperature Alarm Data Interval OK!#";
                else if (cmd.Substring(0, 11) == "$SET+01+INT")//设置AD板发送时间间隔指令及其反馈
                    feedBack = "$Set Control Cabin sending data time interval OK!#";
                else if (cmd.Substring(0, 8) == "$SETSal:")
                    feedBack = "$SETSalOK#";
            }


            return feedBack;
        }
    }
}
