# Supplementary material
Source: MDPI journal article supplement (https://www.mdpi.com/2077-1312/10/8/1051)
Supplement: s1 [file s1 › OSNSystem/OSNSystem/OSNSystem/bin/Debug/AreaRestriction_min.js]

var BMapLib = window.BMapLib = BMapLib || {}; (function () {
    var b = BMapLib.AreaRestriction = function () { };
    var a = false;
    var c = null;
    var d = null;
    b.setBounds = function (f, e) {
        if (!f || !e || !(e instanceof BMap.Bounds)) {
            throw "\u8bf7\u68c0\u67e5\u4f20\u5165\u53c2\u6570\u503c\u7684\u5408\u6cd5\u6027";
            return false
        }
        if (a) {
            this.clearBounds()
        }
        c = f;
        d = e;
        c.addEventListener("moveend", this._mapMoveendEvent);
        a = true;
        return true
    };
    b._mapMoveendEvent = function (k) {
        if (d.containsBounds(c.getBounds())) {
            return
        }
        var i = c.getBounds(),
        h = i.getSouthWest(),
        g = i.getNorthEast(),
        m = d.getSouthWest(),
        j = d.getNorthEast();
        var l = {
            n: 0,
            e: 0,
            s: 0,
            w: 0
        };
        l.n = (g.lat < j.lat) ? g.lat : j.lat;
        l.e = (g.lng < j.lng) ? g.lng : j.lng;
        l.s = (h.lat < m.lat) ? m.lat : h.lat;
        l.w = (h.lng < m.lng) ? m.lng : h.lng;
        var f = new BMap.Point(l.w + (l.e - l.w) / 2, l.s + (l.n - l.s) / 2);
        setTimeout(function () {
            c.panTo(f, {
                noAnimation: "no"
            })
        },
        1)
    };
    b.clearBounds = function () {
        if (!a) {
            return
        }
        c.removeEventListener("moveend", this._mapMoveendEvent);
        a = false
    }
})();
