# Supplementary material
Source: MDPI journal article supplement (https://www.mdpi.com/2077-1312/10/8/1051)
Supplement: s1 [file s1 › OSNSystem/OSNSystem/OSNSystem/bin/Debug/CommandLogFile.txt]

Log Entry : 10:37:28 2017年10月25日 

A舱温度上下限设置成功！

------------------------------------


Log Entry : 10:37:58 2017年10月25日 

A舱温度上下限设置成功！

------------------------------------


Log Entry : 10:51:50 2017年10月25日 

A舱通道1电压电流上下限设置成功！

------------------------------------


Log Entry : 10:55:00 2017年10月25日 

A舱通道2电压电流上下限设置成功！

------------------------------------


Log Entry : 10:55:19 2017年10月25日 

A舱通道2电压电流上下限设置成功！

------------------------------------


Log Entry : 10:55:38 2017年10月25日 

A舱温度上下限设置失败！

------------------------------------


Log Entry : 10:56:28 2017年10月25日 

A舱温度上下限设置成功！

------------------------------------


Log Entry : 10:56:42 2017年10月25日 

A舱温度上下限设置成功！

------------------------------------


Log Entry : 10:57:05 2017年10月25日 

B舱通道1电压电流上下限设置成功！

------------------------------------


Log Entry : 10:57:18 2017年10月25日 

B舱通道1电压电流上下限设置成功！

------------------------------------


Log Entry : 10:57:27 2017年10月25日 

B舱通道1电压电流上下限设置成功！

------------------------------------


Log Entry : 10:57:47 2017年10月25日 

B舱通道2电压电流上下限设置成功！

------------------------------------


Log Entry : 10:57:59 2017年10月25日 

B舱通道2电压电流上下限设置成功！

------------------------------------


Log Entry : 10:58:32 2017年10月25日 

B舱温度上下限设置成功！

------------------------------------


Log Entry : 11:21:57 2017年10月25日 

B舱温度上下限设置成功！

------------------------------------


Log Entry : 11:22:42 2017年10月25日 

B舱通道2电压电流上下限设置成功！

------------------------------------


Log Entry : 11:22:57 2017年10月25日 

B舱通道2电压电流上下限设置成功！

------------------------------------


Log Entry : 11:25:04 2017年10月25日 

B舱通道1电压电流上下限设置成功！

------------------------------------


Log Entry : 11:25:57 2017年10月25日 

A舱温度上下限设置成功！

------------------------------------


Log Entry : 11:27:12 2017年10月25日 

A舱通道2电压电流上下限设置成功！

------------------------------------


Log Entry : 11:28:42 2017年10月25日 

A舱通道1电压电流上下限设置成功！

------------------------------------


Log Entry : 11:29:25 2017年10月25日 

A舱通道1电压电流上下限设置成功！

------------------------------------


Log Entry : 11:29:29 2017年10月25日 

A舱通道2电压电流上下限设置失败！

------------------------------------


Log Entry : 11:29:32 2017年10月25日 

A舱温度上下限设置失败！

------------------------------------


Log Entry : 13:12:14 2017年10月25日 

执行高压舱通道1打开！

------------------------------------


Log Entry : 13:12:21 2017年10月25日 

执行高压舱通道1打开失败！

------------------------------------


Log Entry : 13:12:48 2017年10月25日 

执行高压舱通道1打开！

------------------------------------


Log Entry : 13:12:51 2017年10月25日 

执行高压舱通道1打开成功！

------------------------------------


Log Entry : 16:15:51 2017年10月25日 

执行高压舱通道1打开！

------------------------------------


Log Entry : 16:15:53 2017年10月25日 

执行高压舱通道1打开成功！

------------------------------------


Log Entry : 16:17:54 2017年10月25日 

执行高压舱通道1打开！

------------------------------------


Log Entry : 16:17:56 2017年10月25日 

执行高压舱通道1打开成功！

------------------------------------


Log Entry : 16:20:35 2017年10月25日 

执行高压舱通道1关闭！

------------------------------------


Log Entry : 16:20:40 2017年10月25日 

执行高压舱通道1关闭成功！

------------------------------------


Log Entry : 16:25:52 2017年10月25日 

校时指令执行失败！

------------------------------------


Log Entry : 16:26:00 2017年10月25日 

A舱通道2电压电流上下限设置失败！

------------------------------------


Log Entry : 16:26:11 2017年10月25日 

A舱通道2电压电流上下限设置失败！

------------------------------------


Log Entry : 16:26:45 2017年10月25日 

A舱温度上下限设置失败！

------------------------------------


Log Entry : 16:26:55 2017年10月25日 

B舱通道2电压电流上下限设置失败！

------------------------------------


Log Entry : 16:27:06 2017年10月25日 

B舱通道2电压电流上下限设置失败！

------------------------------------


Log Entry : 16:27:13 2017年10月25日 

B舱温度上下限设置失败！

------------------------------------


Log Entry : 09:55:59 2017年10月27日,星期五 

执行高压舱通道1打开！

------------------------------------


Log Entry : 09:56:05 2017年10月27日,星期五 

执行高压舱通道1打开失败！

------------------------------------


Log Entry : 09:56:11 2017年10月27日,星期五 

执行高压舱通道1打开！

------------------------------------


Log Entry : 09:56:18 2017年10月27日,星期五 

执行高压舱通道1打开失败！

------------------------------------


Log Entry : 09:56:29 2017年10月27日,星期五 

低压舱执行通道1打开！

------------------------------------


Log Entry : 09:56:31 2017年10月27日,星期五 

低压舱执行通道1打开成功！

------------------------------------


Log Entry : 09:58:41 2017年10月27日,星期五 

执行高压舱通道1打开！

------------------------------------


Log Entry : 09:58:43 2017年10月27日,星期五 

执行高压舱通道1打开成功！

------------------------------------


Log Entry : 09:58:44 2017年10月27日,星期五 

执行高压舱通道2打开！

------------------------------------


Log Entry : 09:58:45 2017年10月27日,星期五 

执行高压舱通道2打开成功！

------------------------------------


Log Entry : 09:58:47 2017年10月27日,星期五 

低压舱执行通道2打开！

------------------------------------


Log Entry : 09:58:49 2017年10月27日,星期五 

低压舱执行通道2打开成功！

------------------------------------


Log Entry : 09:58:50 2017年10月27日,星期五 

低压舱执行通道1关闭！

------------------------------------


Log Entry : 09:58:51 2017年10月27日,星期五 

低压舱执行通道1关闭成功！

------------------------------------


Log Entry : 09:58:52 2017年10月27日,星期五 

低压舱执行通道1打开！

------------------------------------


Log Entry : 09:58:54 2017年10月27日,星期五 

低压舱执行通道1打开成功！

------------------------------------


Log Entry : 09:59:41 2017年10月27日,星期五 

A舱通道2电压电流上下限设置失败！

------------------------------------


Log Entry : 10:00:02 2017年10月27日,星期五 

A舱通道2电压电流上下限设置失败！

------------------------------------


Log Entry : 10:00:10 2017年10月27日,星期五 

A舱通道2电压电流上下限设置失败！

------------------------------------


Log Entry : 10:13:55 2017年10月27日,星期五 

执行高压舱通道1打开！

------------------------------------


Log Entry : 10:13:57 2017年10月27日,星期五 

执行高压舱通道1打开成功！

------------------------------------


Log Entry : 10:13:58 2017年10月27日,星期五 

执行高压舱通道2打开！

------------------------------------


Log Entry : 10:14:00 2017年10月27日,星期五 

执行高压舱通道2打开成功！

------------------------------------


Log Entry : 10:14:00 2017年10月27日,星期五 

低压舱执行通道1打开！

------------------------------------


Log Entry : 10:14:02 2017年10月27日,星期五 

低压舱执行通道1打开成功！

------------------------------------


Log Entry : 10:14:03 2017年10月27日,星期五 

低压舱执行通道2打开！

------------------------------------


Log Entry : 10:14:05 2017年10月27日,星期五 

低压舱执行通道2打开成功！

------------------------------------


Log Entry : 10:14:17 2017年10月27日,星期五 

A舱通道1电压电流上下限设置成功！

------------------------------------


Log Entry : 10:14:19 2017年10月27日,星期五 

A舱通道2电压电流上下限设置成功！

------------------------------------


Log Entry : 10:14:23 2017年10月27日,星期五 

A舱温度上下限设置成功！

------------------------------------


Log Entry : 10:15:14 2017年10月27日,星期五 

B舱通道1电压电流上下限设置成功！

------------------------------------


Log Entry : 10:15:21 2017年10月27日,星期五 

B舱通道2电压电流上下限设置成功！

------------------------------------


Log Entry : 10:15:23 2017年10月27日,星期五 

B舱温度上下限设置成功！

------------------------------------


Log Entry : 10:15:35 2017年10月27日,星期五 

B舱温度上下限设置成功！

------------------------------------


Log Entry : 10:18:01 2017年10月27日,星期五 

执行高压舱通道1关闭！

------------------------------------


Log Entry : 10:18:03 2017年10月27日,星期五 

执行高压舱通道1关闭成功！

------------------------------------


Log Entry : 10:18:10 2017年10月27日,星期五 

执行高压舱通道1打开！

------------------------------------


Log Entry : 10:18:11 2017年10月27日,星期五 

执行高压舱通道1打开成功！

------------------------------------


Log Entry : 10:18:23 2017年10月27日,星期五 

执行高压舱通道2关闭！

------------------------------------


Log Entry : 10:18:25 2017年10月27日,星期五 

执行高压舱通道2关闭成功！

------------------------------------


Log Entry : 10:18:26 2017年10月27日,星期五 

执行高压舱通道2打开！

------------------------------------


Log Entry : 10:18:27 2017年10月27日,星期五 

执行高压舱通道2打开成功！

------------------------------------


Log Entry : 10:18:28 2017年10月27日,星期五 

低压舱执行通道1关闭！

------------------------------------


Log Entry : 10:18:30 2017年10月27日,星期五 

低压舱执行通道1关闭成功！

------------------------------------


Log Entry : 10:18:31 2017年10月27日,星期五 

低压舱执行通道1打开！

------------------------------------


Log Entry : 10:18:32 2017年10月27日,星期五 

低压舱执行通道1打开成功！

------------------------------------


Log Entry : 10:18:33 2017年10月27日,星期五 

低压舱执行通道2关闭！

------------------------------------


Log Entry : 10:18:34 2017年10月27日,星期五 

低压舱执行通道2关闭成功！

------------------------------------


Log Entry : 10:18:35 2017年10月27日,星期五 

低压舱执行通道2打开！

------------------------------------


Log Entry : 10:18:37 2017年10月27日,星期五 

低压舱执行通道2打开成功！

------------------------------------


Log Entry : 10:20:07 2017年10月27日,星期五 

校时指令执行失败！

------------------------------------


Log Entry : 10:20:36 2017年10月27日,星期五 

校时指令执行失败！

------------------------------------


Log Entry : 10:39:12 2017年10月27日,星期五 

校时指令执行成功！

------------------------------------


Log Entry : 10:39:16 2017年10月27日,星期五 

校时指令执行成功！

------------------------------------


Log Entry : 10:40:16 2017年10月27日,星期五 

A舱通道1电压电流上下限设置成功！

------------------------------------


Log Entry : 10:40:18 2017年10月27日,星期五 

A舱通道2电压电流上下限设置成功！

------------------------------------


Log Entry : 10:40:21 2017年10月27日,星期五 

A舱温度上下限设置成功！

------------------------------------


Log Entry : 10:40:23 2017年10月27日,星期五 

B舱通道1电压电流上下限设置成功！

------------------------------------


Log Entry : 10:40:25 2017年10月27日,星期五 

B舱通道2电压电流上下限设置成功！

------------------------------------


Log Entry : 10:40:28 2017年10月27日,星期五 

B舱温度上下限设置成功！

------------------------------------


Log Entry : 10:40:41 2017年10月27日,星期五 

执行高压舱通道1打开！

------------------------------------


Log Entry : 10:40:43 2017年10月27日,星期五 

执行高压舱通道1打开成功！

------------------------------------


Log Entry : 10:40:43 2017年10月27日,星期五 

执行高压舱通道2打开！

------------------------------------


Log Entry : 10:40:45 2017年10月27日,星期五 

执行高压舱通道2打开成功！

------------------------------------


Log Entry : 10:40:46 2017年10月27日,星期五 

低压舱执行通道1打开！

------------------------------------


Log Entry : 10:40:47 2017年10月27日,星期五 

低压舱执行通道1打开成功！

------------------------------------


Log Entry : 10:40:48 2017年10月27日,星期五 

低压舱执行通道2打开！

------------------------------------


Log Entry : 10:40:49 2017年10月27日,星期五 

低压舱执行通道2打开成功！

------------------------------------


Log Entry : 10:48:13 2017年10月27日,星期五 

A舱通道1电压电流上下限设置成功！

------------------------------------


Log Entry : 10:48:52 2017年10月27日,星期五 

A舱通道1电压电流上下限设置成功！

------------------------------------


Log Entry : 10:51:25 2017年10月27日,星期五 

执行高压舱通道1打开！

------------------------------------


Log Entry : 10:51:32 2017年10月27日,星期五 

执行高压舱通道1打开失败！

------------------------------------


Log Entry : 10:51:44 2017年10月27日,星期五 

执行高压舱通道1打开！

------------------------------------


Log Entry : 10:51:46 2017年10月27日,星期五 

执行高压舱通道1打开成功！

------------------------------------


Log Entry : 10:51:53 2017年10月27日,星期五 

执行高压舱通道1关闭！

------------------------------------


Log Entry : 10:51:55 2017年10月27日,星期五 

执行高压舱通道1关闭成功！

------------------------------------


Log Entry : 10:51:56 2017年10月27日,星期五 

执行高压舱通道1打开！

------------------------------------


Log Entry : 10:51:59 2017年10月27日,星期五 

执行高压舱通道1打开成功！

------------------------------------


Log Entry : 10:52:10 2017年10月27日,星期五 

A舱通道2电压电流上下限设置成功！

------------------------------------


Log Entry : 10:52:41 2017年10月27日,星期五 

A舱通道2电压电流上下限设置成功！

------------------------------------


Log Entry : 10:53:36 2017年10月27日,星期五 

A舱通道2电压电流上下限设置失败！

------------------------------------


Log Entry : 10:53:40 2017年10月27日,星期五 

A舱通道2电压电流上下限设置成功！

------------------------------------


Log Entry : 10:53:42 2017年10月27日,星期五 

执行高压舱通道2打开！

------------------------------------


Log Entry : 10:53:44 2017年10月27日,星期五 

执行高压舱通道2打开成功！

------------------------------------


Log Entry : 10:53:56 2017年10月27日,星期五 

B舱通道1电压电流上下限设置成功！

------------------------------------


Log Entry : 10:54:04 2017年10月27日,星期五 

B舱通道2电压电流上下限设置成功！

------------------------------------


Log Entry : 10:54:24 2017年10月27日,星期五 

B舱通道1电压电流上下限设置成功！

------------------------------------


Log Entry : 10:54:26 2017年10月27日,星期五 

B舱通道2电压电流上下限设置成功！

------------------------------------


Log Entry : 10:54:27 2017年10月27日,星期五 

低压舱执行通道1打开！

------------------------------------


Log Entry : 10:54:29 2017年10月27日,星期五 

低压舱执行通道1打开成功！

------------------------------------


Log Entry : 10:54:44 2017年10月27日,星期五 

B舱通道2电压电流上下限设置失败！

------------------------------------


Log Entry : 10:54:47 2017年10月27日,星期五 

B舱通道1电压电流上下限设置成功！

------------------------------------


Log Entry : 10:54:49 2017年10月27日,星期五 

低压舱执行通道1打开！

------------------------------------


Log Entry : 10:54:51 2017年10月27日,星期五 

低压舱执行通道1打开成功！

------------------------------------


Log Entry : 10:54:54 2017年10月27日,星期五 

低压舱执行通道2打开！

------------------------------------


Log Entry : 10:54:56 2017年10月27日,星期五 

低压舱执行通道2打开成功！

------------------------------------


Log Entry : 10:55:14 2017年10月27日,星期五 

B舱通道1电压电流上下限设置成功！

------------------------------------


Log Entry : 10:55:25 2017年10月27日,星期五 

B舱通道2电压电流上下限设置失败！

------------------------------------


Log Entry : 10:55:28 2017年10月27日,星期五 

B舱通道1电压电流上下限设置成功！

------------------------------------


Log Entry : 10:55:29 2017年10月27日,星期五 

低压舱执行通道1打开！

------------------------------------


Log Entry : 10:55:31 2017年10月27日,星期五 

低压舱执行通道1打开成功！

------------------------------------


Log Entry : 10:56:21 2017年10月27日,星期五 

低压舱执行通道1关闭！

------------------------------------


Log Entry : 10:56:23 2017年10月27日,星期五 

低压舱执行通道1关闭成功！

------------------------------------


Log Entry : 10:56:24 2017年10月27日,星期五 

低压舱执行通道1打开！

------------------------------------


Log Entry : 10:56:26 2017年10月27日,星期五 

低压舱执行通道1打开成功！

------------------------------------


Log Entry : 10:56:48 2017年10月27日,星期五 

B舱通道1电压电流上下限设置成功！

------------------------------------


Log Entry : 10:57:01 2017年10月27日,星期五 

B舱通道1电压电流上下限设置成功！

------------------------------------


Log Entry : 10:57:17 2017年10月27日,星期五 

B舱通道1电压电流上下限设置成功！

------------------------------------


Log Entry : 10:57:23 2017年10月27日,星期五 

B舱通道1电压电流上下限设置成功！

------------------------------------


Log Entry : 10:57:24 2017年10月27日,星期五 

低压舱执行通道1打开！

------------------------------------


Log Entry : 10:57:28 2017年10月27日,星期五 

低压舱执行通道1打开成功！

------------------------------------


Log Entry : 10:57:37 2017年10月27日,星期五 

B舱通道1电压电流上下限设置成功！

------------------------------------


Log Entry : 10:57:51 2017年10月27日,星期五 

B舱通道1电压电流上下限设置成功！

------------------------------------


Log Entry : 10:58:01 2017年10月27日,星期五 

B舱通道2电压电流上下限设置成功！

------------------------------------


Log Entry : 10:58:11 2017年10月27日,星期五 

B舱通道2电压电流上下限设置成功！

------------------------------------


Log Entry : 10:58:24 2017年10月27日,星期五 

B舱通道2电压电流上下限设置成功！

------------------------------------


Log Entry : 10:58:31 2017年10月27日,星期五 

B舱通道2电压电流上下限设置成功！

------------------------------------


Log Entry : 10:58:32 2017年10月27日,星期五 

低压舱执行通道2打开！

------------------------------------


Log Entry : 10:58:34 2017年10月27日,星期五 

低压舱执行通道2打开成功！

------------------------------------


Log Entry : 10:58:44 2017年10月27日,星期五 

B舱通道2电压电流上下限设置成功！

------------------------------------


Log Entry : 10:58:52 2017年10月27日,星期五 

B舱温度上下限设置成功！

------------------------------------


Log Entry : 10:59:01 2017年10月27日,星期五 

B舱温度上下限设置成功！

------------------------------------


Log Entry : 10:59:07 2017年10月27日,星期五 

B舱温度上下限设置成功！

------------------------------------


Log Entry : 10:59:19 2017年10月27日,星期五 

A舱温度上下限设置成功！

------------------------------------


Log Entry : 10:59:34 2017年10月27日,星期五 

A舱温度上下限设置成功！

------------------------------------


Log Entry : 10:59:40 2017年10月27日,星期五 

A舱温度上下限设置成功！

------------------------------------


Log Entry : 10:59:52 2017年10月27日,星期五 

A舱通道2电压电流上下限设置成功！

------------------------------------


Log Entry : 11:00:12 2017年10月27日,星期五 

A舱通道2电压电流上下限设置成功！

------------------------------------


Log Entry : 11:00:19 2017年10月27日,星期五 

A舱通道2电压电流上下限设置成功！

------------------------------------


Log Entry : 11:00:22 2017年10月27日,星期五 

执行高压舱通道2打开！

------------------------------------


Log Entry : 11:00:23 2017年10月27日,星期五 

执行高压舱通道2打开成功！

------------------------------------


Log Entry : 11:00:36 2017年10月27日,星期五 

A舱通道2电压电流上下限设置成功！

------------------------------------


Log Entry : 11:00:46 2017年10月27日,星期五 

A舱通道2电压电流上下限设置成功！

------------------------------------


Log Entry : 11:00:56 2017年10月27日,星期五 

A舱通道1电压电流上下限设置成功！

------------------------------------


Log Entry : 11:01:21 2017年10月27日,星期五 

A舱通道1电压电流上下限设置成功！

------------------------------------


Log Entry : 11:01:46 2017年10月27日,星期五 

A舱通道1电压电流上下限设置成功！

------------------------------------


Log Entry : 11:02:05 2017年10月27日,星期五 

A舱通道1电压电流上下限设置成功！

------------------------------------


Log Entry : 11:02:21 2017年10月27日,星期五 

A舱通道1电压电流上下限设置成功！

------------------------------------


Log Entry : 11:02:55 2017年10月27日,星期五 

A舱通道2电压电流上下限设置成功！

------------------------------------


Log Entry : 11:03:01 2017年10月27日,星期五 

A舱通道2电压电流上下限设置成功！

------------------------------------


Log Entry : 11:03:03 2017年10月27日,星期五 

执行高压舱通道2打开！

------------------------------------


Log Entry : 11:03:04 2017年10月27日,星期五 

执行高压舱通道2打开成功！

------------------------------------


Log Entry : 11:03:19 2017年10月27日,星期五 

A舱通道2电压电流上下限设置成功！

------------------------------------


Log Entry : 11:03:31 2017年10月27日,星期五 

A舱通道2电压电流上下限设置成功！

------------------------------------


Log Entry : 11:03:42 2017年10月27日,星期五 

A舱通道2电压电流上下限设置成功！

------------------------------------


Log Entry : 11:03:44 2017年10月27日,星期五 

执行高压舱通道2打开！

------------------------------------


Log Entry : 11:03:45 2017年10月27日,星期五 

执行高压舱通道2打开成功！

------------------------------------


Log Entry : 11:03:55 2017年10月27日,星期五 

执行高压舱通道1关闭！

------------------------------------


Log Entry : 11:03:57 2017年10月27日,星期五 

执行高压舱通道1关闭成功！

------------------------------------


Log Entry : 11:03:58 2017年10月27日,星期五 

执行高压舱通道1打开！

------------------------------------


Log Entry : 11:04:05 2017年10月27日,星期五 

执行高压舱通道1打开成功！

------------------------------------


Log Entry : 11:05:05 2017年10月27日,星期五 

A舱通道2电压电流上下限设置失败！

------------------------------------


Log Entry : 11:05:07 2017年10月27日,星期五 

A舱通道1电压电流上下限设置成功！

------------------------------------


Log Entry : 11:05:41 2017年10月27日,星期五 

A舱通道2电压电流上下限设置成功！

------------------------------------


Log Entry : 11:06:07 2017年10月27日,星期五 

执行高压舱通道2打开！

------------------------------------


Log Entry : 11:06:09 2017年10月27日,星期五 

执行高压舱通道2打开成功！

------------------------------------


Log Entry : 11:06:19 2017年10月27日,星期五 

A舱通道2电压电流上下限设置成功！

------------------------------------


Log Entry : 11:06:21 2017年10月27日,星期五 

执行高压舱通道2打开！

------------------------------------


Log Entry : 11:06:23 2017年10月27日,星期五 

执行高压舱通道2打开成功！

------------------------------------


Log Entry : 11:06:55 2017年10月27日,星期五 

A舱通道2电压电流上下限设置成功！

------------------------------------


Log Entry : 11:07:08 2017年10月27日,星期五 

A舱通道2电压电流上下限设置成功！

------------------------------------


Log Entry : 11:07:12 2017年10月27日,星期五 

执行高压舱通道2打开！

------------------------------------


Log Entry : 11:07:14 2017年10月27日,星期五 

执行高压舱通道2打开成功！

------------------------------------


Log Entry : 11:35:59 2017年10月27日,星期五 

A舱通道1电压电流上下限设置成功！

------------------------------------


Log Entry : 11:36:01 2017年10月27日,星期五 

A舱通道2电压电流上下限设置成功！

------------------------------------


Log Entry : 11:36:03 2017年10月27日,星期五 

A舱温度上下限设置成功！

------------------------------------


Log Entry : 11:36:05 2017年10月27日,星期五 

B舱通道1电压电流上下限设置成功！

------------------------------------


Log Entry : 11:36:07 2017年10月27日,星期五 

B舱通道2电压电流上下限设置成功！

------------------------------------


Log Entry : 11:36:09 2017年10月27日,星期五 

B舱温度上下限设置成功！

------------------------------------


Log Entry : 11:36:13 2017年10月27日,星期五 

执行高压舱通道1关闭！

------------------------------------


Log Entry : 11:36:16 2017年10月27日,星期五 

执行高压舱通道1关闭成功！

------------------------------------


Log Entry : 11:36:17 2017年10月27日,星期五 

执行高压舱通道2关闭！

------------------------------------


Log Entry : 11:36:18 2017年10月27日,星期五 

执行高压舱通道2关闭成功！

------------------------------------


Log Entry : 11:36:20 2017年10月27日,星期五 

低压舱执行通道1关闭！

------------------------------------


Log Entry : 11:36:21 2017年10月27日,星期五 

低压舱执行通道1关闭成功！

------------------------------------


Log Entry : 11:36:22 2017年10月27日,星期五 

低压舱执行通道2关闭！

------------------------------------


Log Entry : 11:36:24 2017年10月27日,星期五 

低压舱执行通道2关闭成功！

------------------------------------


Log Entry : 11:36:26 2017年10月27日,星期五 

执行高压舱通道1打开！

------------------------------------


Log Entry : 11:36:27 2017年10月27日,星期五 

执行高压舱通道1打开成功！

------------------------------------


Log Entry : 11:36:28 2017年10月27日,星期五 

执行高压舱通道2打开！

------------------------------------


Log Entry : 11:36:29 2017年10月27日,星期五 

执行高压舱通道2打开成功！

------------------------------------


Log Entry : 11:36:30 2017年10月27日,星期五 

低压舱执行通道1打开！

------------------------------------


Log Entry : 11:36:31 2017年10月27日,星期五 

低压舱执行通道1打开成功！

------------------------------------


Log Entry : 11:36:32 2017年10月27日,星期五 

低压舱执行通道2打开！

------------------------------------


Log Entry : 11:36:34 2017年10月27日,星期五 

低压舱执行通道2打开成功！

------------------------------------


Log Entry : 16:53:42 2017年11月3日,星期五 

B舱温度上下限设置失败！

------------------------------------


Log Entry : 16:54:23 2017年11月3日,星期五 

B舱温度上下限设置成功！

------------------------------------


Log Entry : 16:54:29 2017年11月3日,星期五 

B舱通道2电压电流上下限设置成功！

------------------------------------


Log Entry : 16:54:32 2017年11月3日,星期五 

B舱通道1电压电流上下限设置成功！

------------------------------------


Log Entry : 16:54:35 2017年11月3日,星期五 

A舱温度上下限设置成功！

------------------------------------


Log Entry : 16:54:38 2017年11月3日,星期五 

A舱通道2电压电流上下限设置成功！

------------------------------------


Log Entry : 16:54:42 2017年11月3日,星期五 

A舱通道1电压电流上下限设置成功！

------------------------------------


Log Entry : 16:54:45 2017年11月3日,星期五 

执行高压舱通道1打开！

------------------------------------


Log Entry : 16:54:48 2017年11月3日,星期五 

执行高压舱通道1打开成功！

------------------------------------


Log Entry : 16:55:03 2017年11月3日,星期五 

低压舱执行通道1打开！

------------------------------------


Log Entry : 16:55:06 2017年11月3日,星期五 

低压舱执行通道1打开成功！

------------------------------------


Log Entry : 16:55:28 2017年11月3日,星期五 

低压舱执行通道2打开！

------------------------------------


Log Entry : 16:55:32 2017年11月3日,星期五 

低压舱执行通道2打开成功！

------------------------------------


Log Entry : 16:58:39 2017年11月3日,星期五 

执行高压舱通道1关闭！

------------------------------------


Log Entry : 16:58:42 2017年11月3日,星期五 

执行高压舱通道1关闭成功！

------------------------------------


Log Entry : 16:58:48 2017年11月3日,星期五 

低压舱执行通道1关闭！

------------------------------------


Log Entry : 16:58:51 2017年11月3日,星期五 

低压舱执行通道1关闭成功！

------------------------------------


Log Entry : 16:58:53 2017年11月3日,星期五 

低压舱执行通道2关闭！

------------------------------------


Log Entry : 16:58:56 2017年11月3日,星期五 

低压舱执行通道2关闭成功！

------------------------------------


Log Entry : 09:48:48 2017年11月6日,星期一 

执行高压舱通道1打开！

------------------------------------


Log Entry : 09:48:52 2017年11月6日,星期一 

执行高压舱通道1打开成功！

------------------------------------


Log Entry : 09:48:59 2017年11月6日,星期一 

低压舱执行通道1打开！

------------------------------------


Log Entry : 09:49:06 2017年11月6日,星期一 

低压舱执行通道1打开失败！

------------------------------------


Log Entry : 09:56:04 2017年11月6日,星期一 

B舱通道2电压电流上下限设置成功！

------------------------------------


Log Entry : 09:56:06 2017年11月6日,星期一 

B舱通道1电压电流上下限设置成功！

------------------------------------


Log Entry : 09:56:18 2017年11月6日,星期一 

执行高压舱通道1打开！

------------------------------------


Log Entry : 09:56:20 2017年11月6日,星期一 

执行高压舱通道1打开成功！

------------------------------------


Log Entry : 09:56:26 2017年11月6日,星期一 

低压舱执行通道1打开！

------------------------------------


Log Entry : 09:56:28 2017年11月6日,星期一 

低压舱执行通道1打开成功！

------------------------------------


Log Entry : 09:56:34 2017年11月6日,星期一 

低压舱执行通道2打开！

------------------------------------


Log Entry : 09:56:36 2017年11月6日,星期一 

低压舱执行通道2打开成功！

------------------------------------


Log Entry : 12:21:23 2017年11月6日,星期一 

A舱通道1电压电流上下限设置成功！

------------------------------------


Log Entry : 12:21:29 2017年11月6日,星期一 

A舱通道2电压电流上下限设置成功！

------------------------------------


Log Entry : 12:22:06 2017年11月6日,星期一 

执行高压舱通道1打开！

------------------------------------


Log Entry : 12:22:10 2017年11月6日,星期一 

执行高压舱通道1打开成功！

------------------------------------


Log Entry : 12:22:12 2017年11月6日,星期一 

低压舱执行通道1打开！

------------------------------------


Log Entry : 12:22:14 2017年11月6日,星期一 

低压舱执行通道1打开成功！

------------------------------------


Log Entry : 12:22:15 2017年11月6日,星期一 

低压舱执行通道2打开！

------------------------------------


Log Entry : 12:22:17 2017年11月6日,星期一 

低压舱执行通道2打开成功！

------------------------------------


Log Entry : 12:22:33 2017年11月6日,星期一 

执行高压舱通道1关闭！

------------------------------------


Log Entry : 12:22:35 2017年11月6日,星期一 

执行高压舱通道1关闭成功！

------------------------------------


Log Entry : 14:45:22 2017年11月6日,星期一 

低压舱执行通道1关闭！

------------------------------------


Log Entry : 14:45:24 2017年11月6日,星期一 

低压舱执行通道1关闭成功！

------------------------------------


Log Entry : 14:45:27 2017年11月6日,星期一 

低压舱执行通道2关闭！

------------------------------------


Log Entry : 14:45:30 2017年11月6日,星期一 

低压舱执行通道2关闭成功！

------------------------------------


Log Entry : 15:45:09 2017年11月6日,星期一 

A舱通道1电压电流上下限设置成功！

------------------------------------


Log Entry : 15:45:11 2017年11月6日,星期一 

A舱通道2电压电流上下限设置成功！

------------------------------------


Log Entry : 15:46:30 2017年11月6日,星期一 

A舱温度上下限设置失败！

------------------------------------


Log Entry : 15:46:37 2017年11月6日,星期一 

A舱温度上下限设置失败！

------------------------------------


Log Entry : 15:46:41 2017年11月6日,星期一 

A舱通道1电压电流上下限设置成功！

------------------------------------


Log Entry : 15:46:49 2017年11月6日,星期一 

A舱温度上下限设置失败！

------------------------------------


Log Entry : 15:46:53 2017年11月6日,星期一 

执行高压舱通道1打开！

------------------------------------


Log Entry : 15:46:56 2017年11月6日,星期一 

执行高压舱通道1打开成功！

------------------------------------


Log Entry : 15:47:43 2017年11月6日,星期一 

执行高压舱通道1关闭！

------------------------------------


Log Entry : 15:47:45 2017年11月6日,星期一 

执行高压舱通道1关闭成功！

------------------------------------


Log Entry : 15:55:06 2017年11月6日,星期一 

A舱通道1电压电流上下限设置成功！

------------------------------------


Log Entry : 15:55:10 2017年11月6日,星期一 

A舱通道2电压电流上下限设置成功！

------------------------------------


Log Entry : 15:55:16 2017年11月6日,星期一 

A舱温度上下限设置成功！

------------------------------------


Log Entry : 15:56:44 2017年11月6日,星期一 

A舱温度上下限设置成功！

------------------------------------


Log Entry : 15:56:59 2017年11月6日,星期一 

校时指令执行成功！

------------------------------------


Log Entry : 15:59:36 2017年11月6日,星期一 

A舱通道1电压电流上下限设置成功！

------------------------------------


Log Entry : 15:59:39 2017年11月6日,星期一 

A舱通道2电压电流上下限设置成功！

------------------------------------


Log Entry : 16:00:26 2017年11月6日,星期一 

执行高压舱通道1打开！

------------------------------------


Log Entry : 16:00:28 2017年11月6日,星期一 

执行高压舱通道1打开成功！

------------------------------------


Log Entry : 16:01:06 2017年11月6日,星期一 

执行高压舱通道2打开！

------------------------------------


Log Entry : 16:01:08 2017年11月6日,星期一 

执行高压舱通道2打开成功！

------------------------------------


Log Entry : 16:02:11 2017年11月6日,星期一 

执行高压舱通道2关闭！

------------------------------------


Log Entry : 16:02:14 2017年11月6日,星期一 

执行高压舱通道2关闭成功！

------------------------------------


Log Entry : 16:02:30 2017年11月6日,星期一 

执行高压舱通道1关闭！

------------------------------------


Log Entry : 16:02:32 2017年11月6日,星期一 

执行高压舱通道1关闭成功！

------------------------------------


Log Entry : 16:04:09 2017年11月6日,星期一 

低压舱执行通道1打开！

------------------------------------


Log Entry : 16:04:12 2017年11月6日,星期一 

低压舱执行通道1打开成功！

------------------------------------


Log Entry : 16:04:35 2017年11月6日,星期一 

低压舱执行通道2打开！

------------------------------------


Log Entry : 16:04:38 2017年11月6日,星期一 

低压舱执行通道2打开成功！

------------------------------------


Log Entry : 16:04:47 2017年11月6日,星期一 

B舱通道2电压电流上下限设置成功！

------------------------------------


Log Entry : 16:06:44 2017年11月6日,星期一 

低压舱执行通道2关闭！

------------------------------------


Log Entry : 16:06:46 2017年11月6日,星期一 

低压舱执行通道2关闭成功！

------------------------------------


Log Entry : 16:06:48 2017年11月6日,星期一 

低压舱执行通道1关闭！

------------------------------------


Log Entry : 16:06:50 2017年11月6日,星期一 

低压舱执行通道1关闭成功！

------------------------------------


Log Entry : 16:14:06 2017年11月6日,星期一 

A舱通道2电压电流上下限设置成功！

------------------------------------


Log Entry : 16:14:09 2017年11月6日,星期一 

A舱通道1电压电流上下限设置成功！

------------------------------------


Log Entry : 16:14:12 2017年11月6日,星期一 

B舱通道2电压电流上下限设置成功！

------------------------------------


Log Entry : 16:14:15 2017年11月6日,星期一 

B舱通道1电压电流上下限设置成功！

------------------------------------


Log Entry : 16:14:26 2017年11月6日,星期一 

执行高压舱通道1打开！

------------------------------------


Log Entry : 16:14:28 2017年11月6日,星期一 

执行高压舱通道1打开成功！

------------------------------------


Log Entry : 16:15:37 2017年11月6日,星期一 

执行高压舱通道1关闭！

------------------------------------


Log Entry : 16:15:39 2017年11月6日,星期一 

执行高压舱通道1关闭成功！

------------------------------------


Log Entry : 16:35:39 2017年11月6日,星期一 

A舱通道1电压电流上下限设置成功！

------------------------------------


Log Entry : 16:35:43 2017年11月6日,星期一 

A舱通道2电压电流上下限设置成功！

------------------------------------


Log Entry : 16:42:15 2017年11月6日,星期一 

A舱通道1电压电流上下限设置成功！

------------------------------------


Log Entry : 16:42:18 2017年11月6日,星期一 

A舱通道2电压电流上下限设置成功！

------------------------------------


Log Entry : 16:42:21 2017年11月6日,星期一 

B舱通道1电压电流上下限设置成功！

------------------------------------


Log Entry : 16:42:23 2017年11月6日,星期一 

B舱通道2电压电流上下限设置成功！

------------------------------------


Log Entry : 16:42:30 2017年11月6日,星期一 

A舱温度上下限设置成功！

------------------------------------


Log Entry : 16:42:33 2017年11月6日,星期一 

执行高压舱通道1打开！

------------------------------------


Log Entry : 16:42:36 2017年11月6日,星期一 

执行高压舱通道1打开成功！

------------------------------------


Log Entry : 16:42:39 2017年11月6日,星期一 

执行高压舱通道2打开！

------------------------------------


Log Entry : 16:42:41 2017年11月6日,星期一 

执行高压舱通道2打开成功！

------------------------------------


Log Entry : 16:42:43 2017年11月6日,星期一 

低压舱执行通道1打开！

------------------------------------


Log Entry : 16:42:46 2017年11月6日,星期一 

低压舱执行通道1打开成功！

------------------------------------


Log Entry : 16:42:47 2017年11月6日,星期一 

低压舱执行通道2打开！

------------------------------------


Log Entry : 16:42:49 2017年11月6日,星期一 

低压舱执行通道2打开成功！

------------------------------------


Log Entry : 16:44:15 2017年11月6日,星期一 

执行高压舱通道1关闭！

------------------------------------


Log Entry : 16:44:17 2017年11月6日,星期一 

执行高压舱通道1关闭成功！

------------------------------------


Log Entry : 16:45:08 2017年11月6日,星期一 

执行高压舱通道1打开！

------------------------------------


Log Entry : 16:45:10 2017年11月6日,星期一 

执行高压舱通道1打开成功！

------------------------------------


Log Entry : 16:48:23 2017年11月6日,星期一 

执行高压舱通道1关闭！

------------------------------------


Log Entry : 16:48:26 2017年11月6日,星期一 

执行高压舱通道1关闭成功！

------------------------------------


Log Entry : 16:49:37 2017年11月6日,星期一 

执行高压舱通道2关闭！

------------------------------------


Log Entry : 16:49:39 2017年11月6日,星期一 

执行高压舱通道2关闭成功！

------------------------------------


Log Entry : 16:50:48 2017年11月6日,星期一 

低压舱执行通道1关闭！

------------------------------------


Log Entry : 16:50:50 2017年11月6日,星期一 

低压舱执行通道1关闭成功！

------------------------------------


Log Entry : 16:50:53 2017年11月6日,星期一 

低压舱执行通道2关闭！

------------------------------------


Log Entry : 16:50:56 2017年11月6日,星期一 

低压舱执行通道2关闭成功！

------------------------------------


Log Entry : 09:07:47 2017年11月7日,星期二 

执行高压舱通道1打开！

------------------------------------


Log Entry : 09:07:50 2017年11月7日,星期二 

执行高压舱通道1打开成功！

------------------------------------


Log Entry : 09:08:07 2017年11月7日,星期二 

执行高压舱通道2打开！

------------------------------------


Log Entry : 09:08:10 2017年11月7日,星期二 

执行高压舱通道2打开成功！

------------------------------------


Log Entry : 09:08:15 2017年11月7日,星期二 

低压舱执行通道1打开！

------------------------------------


Log Entry : 09:08:18 2017年11月7日,星期二 

低压舱执行通道1打开成功！

------------------------------------


Log Entry : 09:08:26 2017年11月7日,星期二 

低压舱执行通道2打开！

------------------------------------


Log Entry : 09:08:29 2017年11月7日,星期二 

低压舱执行通道2打开成功！

------------------------------------


Log Entry : 09:09:34 2017年11月7日,星期二 

B舱通道2电压电流上下限设置成功！

------------------------------------


Log Entry : 09:21:43 2017年11月7日,星期二 

执行高压舱通道1关闭！

------------------------------------


Log Entry : 09:21:45 2017年11月7日,星期二 

执行高压舱通道1关闭成功！

------------------------------------


Log Entry : 13:11:52 2017年11月7日,星期二 

执行高压舱通道1打开！

------------------------------------


Log Entry : 13:11:55 2017年11月7日,星期二 

执行高压舱通道1打开成功！

------------------------------------


Log Entry : 13:23:25 2017年11月7日,星期二 

执行高压舱通道1关闭！

------------------------------------


Log Entry : 13:23:28 2017年11月7日,星期二 

执行高压舱通道1关闭成功！

------------------------------------


Log Entry : 13:29:38 2017年11月7日,星期二 

执行高压舱通道2关闭！

------------------------------------


Log Entry : 13:29:40 2017年11月7日,星期二 

执行高压舱通道2关闭成功！

------------------------------------


Log Entry : 13:29:41 2017年11月7日,星期二 

低压舱执行通道1关闭！

------------------------------------


Log Entry : 13:29:44 2017年11月7日,星期二 

低压舱执行通道1关闭成功！

------------------------------------


Log Entry : 13:29:46 2017年11月7日,星期二 

低压舱执行通道2关闭！

------------------------------------


Log Entry : 13:29:48 2017年11月7日,星期二 

低压舱执行通道2关闭成功！

------------------------------------


Log Entry : 15:07:48 2017年11月10日,星期五 

A舱通道1电压电流上下限设置成功！

------------------------------------


Log Entry : 15:07:51 2017年11月10日,星期五 

A舱通道2电压电流上下限设置成功！

------------------------------------


Log Entry : 15:07:53 2017年11月10日,星期五 

B舱通道1电压电流上下限设置成功！

------------------------------------


Log Entry : 15:07:56 2017年11月10日,星期五 

B舱通道2电压电流上下限设置成功！

------------------------------------


Log Entry : 15:08:17 2017年11月10日,星期五 

低压舱执行通道1打开！

------------------------------------


Log Entry : 15:08:19 2017年11月10日,星期五 

低压舱执行通道1打开成功！

------------------------------------


Log Entry : 15:08:29 2017年11月10日,星期五 

低压舱执行通道2打开！

------------------------------------


Log Entry : 15:08:31 2017年11月10日,星期五 

低压舱执行通道2打开成功！

------------------------------------


Log Entry : 15:08:42 2017年11月10日,星期五 

执行高压舱通道2打开！

------------------------------------


Log Entry : 15:08:44 2017年11月10日,星期五 

执行高压舱通道2打开成功！

------------------------------------


Log Entry : 15:08:53 2017年11月10日,星期五 

执行高压舱通道1打开！

------------------------------------


Log Entry : 15:08:56 2017年11月10日,星期五 

执行高压舱通道1打开成功！

------------------------------------


Log Entry : 15:10:08 2017年11月10日,星期五 

执行高压舱通道1关闭！

------------------------------------


Log Entry : 15:10:10 2017年11月10日,星期五 

执行高压舱通道1关闭成功！

------------------------------------


Log Entry : 15:37:31 2017年11月10日,星期五 

执行高压舱通道2关闭！

------------------------------------


Log Entry : 15:37:33 2017年11月10日,星期五 

执行高压舱通道2关闭成功！

------------------------------------


Log Entry : 15:37:34 2017年11月10日,星期五 

低压舱执行通道2关闭！

------------------------------------


Log Entry : 15:37:36 2017年11月10日,星期五 

低压舱执行通道2关闭成功！

------------------------------------


Log Entry : 15:37:37 2017年11月10日,星期五 

低压舱执行通道1关闭！

------------------------------------


Log Entry : 15:37:42 2017年11月10日,星期五 

低压舱执行通道1关闭成功！

------------------------------------


Log Entry : 15:19:26 2017年11月16日,星期四 

A舱通道1电压电流上下限设置成功！

------------------------------------


Log Entry : 15:19:29 2017年11月16日,星期四 

A舱通道2电压电流上下限设置成功！

------------------------------------


Log Entry : 15:19:31 2017年11月16日,星期四 

B舱通道2电压电流上下限设置成功！

------------------------------------


Log Entry : 15:19:34 2017年11月16日,星期四 

B舱通道1电压电流上下限设置成功！

------------------------------------


Log Entry : 15:19:37 2017年11月16日,星期四 

执行高压舱通道1打开！

------------------------------------


Log Entry : 15:19:39 2017年11月16日,星期四 

执行高压舱通道1打开成功！

------------------------------------


Log Entry : 15:19:59 2017年11月16日,星期四 

执行高压舱通道1关闭！

------------------------------------


Log Entry : 15:20:01 2017年11月16日,星期四 

执行高压舱通道1关闭成功！

------------------------------------


Log Entry : 15:20:03 2017年11月16日,星期四 

执行高压舱通道2打开！

------------------------------------


Log Entry : 15:20:05 2017年11月16日,星期四 

执行高压舱通道2打开成功！

------------------------------------


Log Entry : 15:20:07 2017年11月16日,星期四 

低压舱执行通道1打开！

------------------------------------


Log Entry : 15:20:09 2017年11月16日,星期四 

低压舱执行通道1打开成功！

------------------------------------


Log Entry : 15:20:11 2017年11月16日,星期四 

低压舱执行通道2打开！

------------------------------------


Log Entry : 15:20:13 2017年11月16日,星期四 

低压舱执行通道2打开成功！

------------------------------------


Log Entry : 15:27:41 2017年11月16日,星期四 

低压舱执行通道2关闭！

------------------------------------


Log Entry : 15:27:43 2017年11月16日,星期四 

低压舱执行通道2关闭成功！

------------------------------------


Log Entry : 15:27:53 2017年11月16日,星期四 

低压舱执行通道2打开！

------------------------------------


Log Entry : 15:27:55 2017年11月16日,星期四 

低压舱执行通道2打开成功！

------------------------------------


Log Entry : 15:53:00 2017年11月16日,星期四 

低压舱执行通道2关闭！

------------------------------------


Log Entry : 15:53:03 2017年11月16日,星期四 

低压舱执行通道2关闭成功！

------------------------------------


Log Entry : 15:53:03 2017年11月16日,星期四 

低压舱执行通道1关闭！

------------------------------------


Log Entry : 15:53:05 2017年11月16日,星期四 

低压舱执行通道1关闭成功！

------------------------------------


Log Entry : 15:53:06 2017年11月16日,星期四 

执行高压舱通道2关闭！

------------------------------------


Log Entry : 15:53:08 2017年11月16日,星期四 

执行高压舱通道2关闭成功！

------------------------------------


Log Entry : 15:58:07 2017年11月16日,星期四 

A舱通道1电压电流上下限设置成功！

------------------------------------


Log Entry : 15:58:09 2017年11月16日,星期四 

A舱通道2电压电流上下限设置成功！

------------------------------------


Log Entry : 15:58:13 2017年11月16日,星期四 

B舱通道1电压电流上下限设置成功！

------------------------------------


Log Entry : 15:58:15 2017年11月16日,星期四 

B舱通道2电压电流上下限设置成功！

------------------------------------


Log Entry : 15:58:19 2017年11月16日,星期四 

低压舱执行通道1打开！

------------------------------------


Log Entry : 15:58:21 2017年11月16日,星期四 

低压舱执行通道1打开成功！

------------------------------------


Log Entry : 15:58:22 2017年11月16日,星期四 

低压舱执行通道2打开！

------------------------------------


Log Entry : 15:58:24 2017年11月16日,星期四 

低压舱执行通道2打开成功！

------------------------------------


Log Entry : 15:58:29 2017年11月16日,星期四 

执行高压舱通道2打开！

------------------------------------


Log Entry : 15:58:32 2017年11月16日,星期四 

执行高压舱通道2打开成功！

------------------------------------


Log Entry : 16:50:31 2017年11月16日,星期四 

执行高压舱通道2关闭！

------------------------------------


Log Entry : 16:51:58 2017年11月16日,星期四 

执行高压舱通道2打开！

------------------------------------


Log Entry : 16:52:00 2017年11月16日,星期四 

执行高压舱通道2打开成功！

------------------------------------


Log Entry : 16:52:01 2017年11月16日,星期四 

执行高压舱通道2关闭！

------------------------------------


Log Entry : 16:52:03 2017年11月16日,星期四 

执行高压舱通道2关闭成功！

------------------------------------


Log Entry : 16:52:04 2017年11月16日,星期四 

低压舱执行通道1打开！

------------------------------------


Log Entry : 16:52:06 2017年11月16日,星期四 

低压舱执行通道1打开成功！

------------------------------------


Log Entry : 16:52:09 2017年11月16日,星期四 

低压舱执行通道2打开！

------------------------------------


Log Entry : 16:52:11 2017年11月16日,星期四 

低压舱执行通道2打开成功！

------------------------------------


Log Entry : 16:52:12 2017年11月16日,星期四 

低压舱执行通道1关闭！

------------------------------------


Log Entry : 16:52:14 2017年11月16日,星期四 

低压舱执行通道1关闭成功！

------------------------------------


Log Entry : 16:52:21 2017年11月16日,星期四 

低压舱执行通道2关闭！

------------------------------------


Log Entry : 16:52:23 2017年11月16日,星期四 

低压舱执行通道2关闭成功！

------------------------------------


Log Entry : 09:31:46 2017年11月17日,星期五 

B舱通道2电压电流上下限设置成功！

------------------------------------


Log Entry : 09:31:50 2017年11月17日,星期五 

B舱通道1电压电流上下限设置成功！

------------------------------------


Log Entry : 09:31:55 2017年11月17日,星期五 

A舱通道2电压电流上下限设置成功！

------------------------------------


Log Entry : 09:31:58 2017年11月17日,星期五 

A舱通道1电压电流上下限设置成功！

------------------------------------


Log Entry : 09:32:02 2017年11月17日,星期五 

低压舱执行通道1打开！

------------------------------------


Log Entry : 09:32:04 2017年11月17日,星期五 

低压舱执行通道1打开成功！

------------------------------------


Log Entry : 09:32:09 2017年11月17日,星期五 

低压舱执行通道2打开！

------------------------------------


Log Entry : 09:32:11 2017年11月17日,星期五 

低压舱执行通道2打开成功！

------------------------------------


Log Entry : 15:00:13 2017年11月17日,星期五 

低压舱执行通道1打开！

------------------------------------


Log Entry : 15:00:15 2017年11月17日,星期五 

低压舱执行通道1打开成功！

------------------------------------


Log Entry : 15:00:16 2017年11月17日,星期五 

低压舱执行通道2打开！

------------------------------------


Log Entry : 15:00:18 2017年11月17日,星期五 

低压舱执行通道2打开成功！

------------------------------------


Log Entry : 15:00:21 2017年11月17日,星期五 

B舱通道1电压电流上下限设置成功！

------------------------------------


Log Entry : 15:00:24 2017年11月17日,星期五 

B舱通道2电压电流上下限设置成功！

------------------------------------


Log Entry : 15:00:26 2017年11月17日,星期五 

A舱通道2电压电流上下限设置成功！

------------------------------------


Log Entry : 15:00:28 2017年11月17日,星期五 

A舱通道1电压电流上下限设置成功！

------------------------------------


Log Entry : 15:10:20 2017年11月17日,星期五 

执行高压舱通道2打开！

------------------------------------


Log Entry : 15:10:22 2017年11月17日,星期五 

执行高压舱通道2打开成功！

------------------------------------


Log Entry : 15:36:32 2017年11月17日,星期五 

执行高压舱通道2关闭！

------------------------------------


Log Entry : 15:36:34 2017年11月17日,星期五 

执行高压舱通道2关闭成功！

------------------------------------


Log Entry : 16:06:22 2017年11月17日,星期五 

低压舱执行通道1打开！

------------------------------------


Log Entry : 16:06:30 2017年11月17日,星期五 

低压舱执行通道1打开失败！

------------------------------------


Log Entry : 16:07:13 2017年11月17日,星期五 

低压舱执行通道1打开！

------------------------------------


Log Entry : 16:07:15 2017年11月17日,星期五 

低压舱执行通道1打开成功！

------------------------------------


Log Entry : 16:07:16 2017年11月17日,星期五 

低压舱执行通道2打开！

------------------------------------


Log Entry : 16:07:19 2017年11月17日,星期五 

低压舱执行通道2打开成功！

------------------------------------


Log Entry : 16:07:32 2017年11月17日,星期五 

B舱通道2电压电流上下限设置成功！

------------------------------------


Log Entry : 16:14:39 2017年11月17日,星期五 

B舱通道2电压电流上下限设置成功！

------------------------------------


Log Entry : 16:14:41 2017年11月17日,星期五 

B舱通道1电压电流上下限设置成功！

------------------------------------


Log Entry : 16:14:45 2017年11月17日,星期五 

校时指令执行成功！

------------------------------------


Log Entry : 16:16:24 2017年11月17日,星期五 

低压舱执行通道2关闭！

------------------------------------


Log Entry : 16:16:26 2017年11月17日,星期五 

低压舱执行通道2关闭成功！

------------------------------------


Log Entry : 16:16:32 2017年11月17日,星期五 

低压舱执行通道2打开！

------------------------------------


Log Entry : 16:16:34 2017年11月17日,星期五 

低压舱执行通道2打开成功！

------------------------------------


Log Entry : 16:27:35 2017年11月17日,星期五 

B舱通道2电压电流上下限设置成功！

------------------------------------


Log Entry : 16:27:44 2017年11月17日,星期五 

B舱通道2电压电流上下限设置成功！

------------------------------------


Log Entry : 16:41:59 2017年11月17日,星期五 

低压舱执行通道2关闭！

------------------------------------


Log Entry : 16:42:01 2017年11月17日,星期五 

低压舱执行通道2关闭成功！

------------------------------------


Log Entry : 16:42:06 2017年11月17日,星期五 

低压舱执行通道1关闭！

------------------------------------


Log Entry : 16:42:08 2017年11月17日,星期五 

低压舱执行通道1关闭成功！

------------------------------------


Log Entry : 14:56:06 2017年11月27日,星期一 

A舱通道1电压电流上下限设置成功！

------------------------------------


Log Entry : 14:56:08 2017年11月27日,星期一 

A舱通道2电压电流上下限设置成功！

------------------------------------


Log Entry : 14:56:11 2017年11月27日,星期一 

B舱通道2电压电流上下限设置成功！

------------------------------------


Log Entry : 14:56:13 2017年11月27日,星期一 

B舱通道1电压电流上下限设置成功！

------------------------------------


Log Entry : 14:56:16 2017年11月27日,星期一 

执行高压舱通道1打开！

------------------------------------


Log Entry : 14:56:18 2017年11月27日,星期一 

执行高压舱通道1打开成功！

------------------------------------


Log Entry : 14:56:20 2017年11月27日,星期一 

执行高压舱通道2打开！

------------------------------------


Log Entry : 14:56:22 2017年11月27日,星期一 

执行高压舱通道2打开成功！

------------------------------------


Log Entry : 14:56:24 2017年11月27日,星期一 

低压舱执行通道1打开！

------------------------------------


Log Entry : 14:56:26 2017年11月27日,星期一 

低压舱执行通道1打开成功！

------------------------------------


Log Entry : 14:56:28 2017年11月27日,星期一 

低压舱执行通道2打开！

------------------------------------


Log Entry : 14:56:30 2017年11月27日,星期一 

低压舱执行通道2打开成功！

------------------------------------


Log Entry : 15:21:08 2017年11月27日,星期一 

执行高压舱通道1关闭！

------------------------------------


Log Entry : 15:21:14 2017年11月27日,星期一 

执行高压舱通道1关闭成功！

------------------------------------


Log Entry : 16:54:47 2017年11月27日,星期一 

执行高压舱通道2关闭！

------------------------------------


Log Entry : 16:54:49 2017年11月27日,星期一 

执行高压舱通道2关闭成功！

------------------------------------


Log Entry : 16:54:51 2017年11月27日,星期一 

低压舱执行通道1关闭！

------------------------------------


Log Entry : 16:54:53 2017年11月27日,星期一 

低压舱执行通道1关闭成功！

------------------------------------


Log Entry : 16:54:57 2017年11月27日,星期一 

低压舱执行通道2关闭！

------------------------------------


Log Entry : 16:55:00 2017年11月27日,星期一 

低压舱执行通道2关闭成功！

------------------------------------


Log Entry : 09:21:24 2017年11月28日,星期二 

执行高压舱通道1打开！

------------------------------------


Log Entry : 09:22:00 2017年11月28日,星期二 

A舱通道1电压电流上下限设置成功！

------------------------------------


Log Entry : 09:22:02 2017年11月28日,星期二 

A舱通道2电压电流上下限设置成功！

------------------------------------


Log Entry : 09:22:06 2017年11月28日,星期二 

B舱通道1电压电流上下限设置成功！

------------------------------------


Log Entry : 09:22:08 2017年11月28日,星期二 

B舱通道2电压电流上下限设置成功！

------------------------------------


Log Entry : 09:22:14 2017年11月28日,星期二 

低压舱执行通道1打开！

------------------------------------


Log Entry : 09:22:17 2017年11月28日,星期二 

低压舱执行通道1打开成功！

------------------------------------


Log Entry : 09:22:18 2017年11月28日,星期二 

低压舱执行通道2打开！

------------------------------------


Log Entry : 09:22:22 2017年11月28日,星期二 

低压舱执行通道2打开成功！

------------------------------------


Log Entry : 14:34:22 2017年11月28日,星期二 

B舱通道2电压电流上下限设置成功！

------------------------------------


Log Entry : 16:54:01 2017年11月28日,星期二 

低压舱执行通道1关闭！

------------------------------------


Log Entry : 16:54:03 2017年11月28日,星期二 

低压舱执行通道1关闭成功！

------------------------------------


Log Entry : 16:54:04 2017年11月28日,星期二 

低压舱执行通道2关闭！

------------------------------------


Log Entry : 16:54:05 2017年11月28日,星期二 

低压舱执行通道2关闭成功！

------------------------------------


Log Entry : 09:14:19 2017年11月29日,星期三 

B舱通道1电压电流上下限设置成功！

------------------------------------


Log Entry : 09:14:21 2017年11月29日,星期三 

B舱通道2电压电流上下限设置成功！

------------------------------------


Log Entry : 09:14:23 2017年11月29日,星期三 

A舱通道1电压电流上下限设置成功！

------------------------------------


Log Entry : 09:14:26 2017年11月29日,星期三 

A舱通道2电压电流上下限设置成功！

------------------------------------


Log Entry : 09:14:36 2017年11月29日,星期三 

低压舱执行通道2打开！

------------------------------------


Log Entry : 09:14:38 2017年11月29日,星期三 

低压舱执行通道2打开成功！

------------------------------------


Log Entry : 09:14:43 2017年11月29日,星期三 

低压舱执行通道1打开！

------------------------------------


Log Entry : 09:14:46 2017年11月29日,星期三 

低压舱执行通道1打开成功！

------------------------------------


Log Entry : 13:56:50 2017年11月29日,星期三 

低压舱执行通道1关闭！

------------------------------------


Log Entry : 09:49:50 2017年12月1日,星期五 

校时指令执行成功！

------------------------------------


Log Entry : 15:08:35 2017年12月1日,星期五 

执行高压舱通道1打开！

------------------------------------


Log Entry : 15:08:42 2017年12月1日,星期五 

执行高压舱通道1打开失败！

------------------------------------


Log Entry : 15:08:45 2017年12月1日,星期五 

低压舱执行通道1打开！

------------------------------------


Log Entry : 15:08:51 2017年12月1日,星期五 

低压舱执行通道1打开失败！

------------------------------------


Log Entry : 15:08:53 2017年12月1日,星期五 

执行高压舱通道1打开！

------------------------------------


Log Entry : 15:08:59 2017年12月1日,星期五 

执行高压舱通道1打开失败！

------------------------------------


Log Entry : 15:09:00 2017年12月1日,星期五 

执行高压舱通道1打开！

------------------------------------


Log Entry : 15:09:06 2017年12月1日,星期五 

执行高压舱通道1打开失败！

------------------------------------


Log Entry : 15:10:30 2017年12月1日,星期五 

执行高压舱通道2打开！

------------------------------------


Log Entry : 15:10:36 2017年12月1日,星期五 

执行高压舱通道2打开失败！

------------------------------------


Log Entry : 15:10:39 2017年12月1日,星期五 

低压舱执行通道2打开！

------------------------------------


Log Entry : 15:10:45 2017年12月1日,星期五 

低压舱执行通道2打开失败！

------------------------------------


Log Entry : 15:10:51 2017年12月1日,星期五 

低压舱执行通道1打开！

------------------------------------


Log Entry : 15:10:57 2017年12月1日,星期五 

低压舱执行通道1打开失败！

------------------------------------


Log Entry : 15:46:08 2017年12月1日,星期五 

执行高压舱通道1打开！

------------------------------------


Log Entry : 15:46:15 2017年12月1日,星期五 

执行高压舱通道1打开失败！

------------------------------------


Log Entry : 15:07:47 2017年12月3日,星期日 

执行高压舱通道1打开！

------------------------------------


Log Entry : 16:01:38 2017年12月5日,星期二 

A舱通道1电压电流上下限设置成功！

------------------------------------


Log Entry : 16:01:40 2017年12月5日,星期二 

A舱通道2电压电流上下限设置成功！

------------------------------------


Log Entry : 16:01:43 2017年12月5日,星期二 

B舱通道1电压电流上下限设置成功！

------------------------------------


Log Entry : 16:01:45 2017年12月5日,星期二 

B舱通道2电压电流上下限设置成功！

------------------------------------


Log Entry : 16:01:49 2017年12月5日,星期二 

执行高压舱通道1打开！

------------------------------------


Log Entry : 16:01:51 2017年12月5日,星期二 

执行高压舱通道1打开成功！

------------------------------------


Log Entry : 16:01:54 2017年12月5日,星期二 

执行高压舱通道2打开！

------------------------------------


Log Entry : 16:01:56 2017年12月5日,星期二 

执行高压舱通道2打开成功！

------------------------------------


Log Entry : 16:02:01 2017年12月5日,星期二 

低压舱执行通道1打开！

------------------------------------


Log Entry : 16:02:05 2017年12月5日,星期二 

低压舱执行通道1打开成功！

------------------------------------


Log Entry : 16:02:16 2017年12月5日,星期二 

低压舱执行通道2打开！

------------------------------------


Log Entry : 16:02:20 2017年12月5日,星期二 

低压舱执行通道2打开成功！

------------------------------------


Log Entry : 16:03:20 2017年12月5日,星期二 

低压舱执行通道2关闭！

------------------------------------


Log Entry : 16:03:23 2017年12月5日,星期二 

低压舱执行通道2关闭成功！

------------------------------------


Log Entry : 16:03:46 2017年12月5日,星期二 

低压舱执行通道1关闭！

------------------------------------


Log Entry : 16:03:48 2017年12月5日,星期二 

低压舱执行通道1关闭成功！

------------------------------------


Log Entry : 16:17:12 2017年12月5日,星期二 

低压舱执行通道2打开！

------------------------------------


Log Entry : 16:17:14 2017年12月5日,星期二 

低压舱执行通道2打开成功！

------------------------------------


Log Entry : 16:17:15 2017年12月5日,星期二 

低压舱执行通道1打开！

------------------------------------


Log Entry : 16:17:17 2017年12月5日,星期二 

低压舱执行通道1打开成功！

------------------------------------


Log Entry : 17:30:10 2017年12月5日,星期二 

执行高压舱通道1关闭！

------------------------------------


Log Entry : 17:30:12 2017年12月5日,星期二 

执行高压舱通道1关闭成功！

------------------------------------


Log Entry : 17:30:18 2017年12月5日,星期二 

执行高压舱通道2关闭！

------------------------------------


Log Entry : 17:30:21 2017年12月5日,星期二 

执行高压舱通道2关闭成功！

------------------------------------


Log Entry : 17:30:24 2017年12月5日,星期二 

低压舱执行通道1关闭！

------------------------------------


Log Entry : 17:30:27 2017年12月5日,星期二 

低压舱执行通道1关闭成功！

------------------------------------


Log Entry : 17:30:43 2017年12月5日,星期二 

低压舱执行通道2关闭！

------------------------------------


Log Entry : 17:30:46 2017年12月5日,星期二 

低压舱执行通道2关闭成功！

------------------------------------


Log Entry : 09:42:52 2017年12月6日,星期三 

B舱通道1电压电流上下限设置成功！

------------------------------------


Log Entry : 09:42:54 2017年12月6日,星期三 

B舱通道2电压电流上下限设置成功！

------------------------------------


Log Entry : 09:42:57 2017年12月6日,星期三 

B舱温度上下限设置成功！

------------------------------------


Log Entry : 09:43:04 2017年12月6日,星期三 

低压舱执行通道1打开！

------------------------------------


Log Entry : 09:43:07 2017年12月6日,星期三 

低压舱执行通道1打开成功！

------------------------------------


Log Entry : 09:43:10 2017年12月6日,星期三 

低压舱执行通道2打开！

------------------------------------


Log Entry : 09:43:13 2017年12月6日,星期三 

低压舱执行通道2打开成功！

------------------------------------


Log Entry : 09:43:37 2017年12月6日,星期三 

执行高压舱通道1打开！

------------------------------------


Log Entry : 09:43:39 2017年12月6日,星期三 

执行高压舱通道1打开成功！

------------------------------------


Log Entry : 09:43:40 2017年12月6日,星期三 

执行高压舱通道2打开！

------------------------------------


Log Entry : 09:43:42 2017年12月6日,星期三 

执行高压舱通道2打开成功！

------------------------------------


Log Entry : 11:41:08 2017年12月6日,星期三 

执行高压舱通道1关闭！

------------------------------------


Log Entry : 11:41:10 2017年12月6日,星期三 

执行高压舱通道1关闭成功！

------------------------------------


Log Entry : 13:31:32 2017年12月6日,星期三 

执行高压舱通道2关闭！

------------------------------------


Log Entry : 13:31:34 2017年12月6日,星期三 

执行高压舱通道2关闭成功！

------------------------------------


Log Entry : 13:31:34 2017年12月6日,星期三 

低压舱执行通道1关闭！

------------------------------------


Log Entry : 13:31:36 2017年12月6日,星期三 

低压舱执行通道1关闭成功！

------------------------------------


Log Entry : 13:31:37 2017年12月6日,星期三 

低压舱执行通道2关闭！

------------------------------------


Log Entry : 13:31:38 2017年12月6日,星期三 

低压舱执行通道2关闭成功！

------------------------------------


Log Entry : 15:24:27 2017年12月7日,星期四 

A舱通道2电压电流上下限设置失败！

------------------------------------


Log Entry : 15:24:31 2017年12月7日,星期四 

B舱通道1电压电流上下限设置成功！

------------------------------------


Log Entry : 15:24:33 2017年12月7日,星期四 

B舱通道2电压电流上下限设置成功！

------------------------------------


Log Entry : 15:27:01 2017年12月7日,星期四 

低压舱执行通道1打开！

------------------------------------


Log Entry : 15:27:03 2017年12月7日,星期四 

低压舱执行通道1打开成功！

------------------------------------


Log Entry : 15:27:07 2017年12月7日,星期四 

低压舱执行通道2打开！

------------------------------------


Log Entry : 15:27:09 2017年12月7日,星期四 

低压舱执行通道2打开成功！

------------------------------------


Log Entry : 15:27:27 2017年12月7日,星期四 

低压舱执行通道1关闭！

------------------------------------


Log Entry : 15:27:29 2017年12月7日,星期四 

低压舱执行通道1关闭成功！

------------------------------------


Log Entry : 15:27:35 2017年12月7日,星期四 

低压舱执行通道2关闭！

------------------------------------


Log Entry : 15:27:37 2017年12月7日,星期四 

低压舱执行通道2关闭成功！

------------------------------------


Log Entry : 16:34:35 2017年12月7日,星期四 

A舱通道1电压电流上下限设置成功！

------------------------------------


Log Entry : 16:34:38 2017年12月7日,星期四 

A舱通道2电压电流上下限设置成功！

------------------------------------


Log Entry : 16:34:41 2017年12月7日,星期四 

A舱温度上下限设置成功！

------------------------------------


Log Entry : 16:34:44 2017年12月7日,星期四 

B舱通道1电压电流上下限设置成功！

------------------------------------


Log Entry : 16:34:47 2017年12月7日,星期四 

B舱通道2电压电流上下限设置成功！

------------------------------------


Log Entry : 16:34:50 2017年12月7日,星期四 

B舱温度上下限设置成功！

------------------------------------


Log Entry : 16:34:53 2017年12月7日,星期四 

执行高压舱通道1打开！

------------------------------------


Log Entry : 16:34:57 2017年12月7日,星期四 

执行高压舱通道1打开成功！

------------------------------------


Log Entry : 16:34:58 2017年12月7日,星期四 

执行高压舱通道2打开！

------------------------------------


Log Entry : 16:35:00 2017年12月7日,星期四 

执行高压舱通道2打开成功！

------------------------------------


Log Entry : 16:35:01 2017年12月7日,星期四 

低压舱执行通道1打开！

------------------------------------


Log Entry : 16:35:04 2017年12月7日,星期四 

低压舱执行通道1打开成功！

------------------------------------


Log Entry : 16:35:05 2017年12月7日,星期四 

低压舱执行通道2打开！

------------------------------------


Log Entry : 16:35:07 2017年12月7日,星期四 

低压舱执行通道2打开成功！

------------------------------------


Log Entry : 17:10:15 2017年12月7日,星期四 

执行高压舱通道1关闭！

------------------------------------


Log Entry : 17:10:17 2017年12月7日,星期四 

执行高压舱通道1关闭成功！

------------------------------------


Log Entry : 17:10:18 2017年12月7日,星期四 

执行高压舱通道2关闭！

------------------------------------


Log Entry : 17:10:21 2017年12月7日,星期四 

执行高压舱通道2关闭成功！

------------------------------------


Log Entry : 17:10:23 2017年12月7日,星期四 

低压舱执行通道1关闭！

------------------------------------


Log Entry : 17:10:27 2017年12月7日,星期四 

低压舱执行通道1关闭成功！

------------------------------------


Log Entry : 17:10:28 2017年12月7日,星期四 

低压舱执行通道2关闭！

------------------------------------


Log Entry : 17:10:30 2017年12月7日,星期四 

低压舱执行通道2关闭成功！

------------------------------------


Log Entry : 09:15:36 2017年12月8日,星期五 

A舱通道1电压电流上下限设置成功！

------------------------------------


Log Entry : 09:15:39 2017年12月8日,星期五 

A舱通道2电压电流上下限设置成功！

------------------------------------


Log Entry : 09:15:41 2017年12月8日,星期五 

B舱通道1电压电流上下限设置成功！

------------------------------------


Log Entry : 09:15:43 2017年12月8日,星期五 

B舱通道2电压电流上下限设置成功！

------------------------------------


Log Entry : 09:15:56 2017年12月8日,星期五 

低压舱执行通道1打开！

------------------------------------


Log Entry : 09:15:58 2017年12月8日,星期五 

低压舱执行通道1打开成功！

------------------------------------


Log Entry : 09:15:59 2017年12月8日,星期五 

低压舱执行通道2打开！

------------------------------------


Log Entry : 09:16:01 2017年12月8日,星期五 

低压舱执行通道2打开成功！

------------------------------------


Log Entry : 14:16:19 2017年12月8日,星期五 

执行高压舱通道1打开！

------------------------------------


Log Entry : 14:16:22 2017年12月8日,星期五 

执行高压舱通道1打开成功！

------------------------------------


Log Entry : 14:16:22 2017年12月8日,星期五 

执行高压舱通道2打开！

------------------------------------


Log Entry : 14:16:24 2017年12月8日,星期五 

执行高压舱通道2打开成功！

------------------------------------


Log Entry : 15:07:33 2017年12月8日,星期五 

执行高压舱通道1打开！

------------------------------------


Log Entry : 15:07:34 2017年12月8日,星期五 

执行高压舱通道1打开成功！

------------------------------------


Log Entry : 15:07:36 2017年12月8日,星期五 

执行高压舱通道2打开！

------------------------------------


Log Entry : 15:07:38 2017年12月8日,星期五 

执行高压舱通道2打开成功！

------------------------------------


Log Entry : 15:07:39 2017年12月8日,星期五 

低压舱执行通道1打开！

------------------------------------


Log Entry : 15:07:41 2017年12月8日,星期五 

低压舱执行通道1打开成功！

------------------------------------


Log Entry : 15:07:43 2017年12月8日,星期五 

低压舱执行通道2打开！

------------------------------------


Log Entry : 15:07:44 2017年12月8日,星期五 

低压舱执行通道2打开成功！

------------------------------------


Log Entry : 16:47:12 2017年12月8日,星期五 

执行高压舱通道1关闭！

------------------------------------


Log Entry : 16:47:14 2017年12月8日,星期五 

执行高压舱通道1关闭成功！

------------------------------------


Log Entry : 16:47:15 2017年12月8日,星期五 

执行高压舱通道2关闭！

------------------------------------


Log Entry : 16:47:18 2017年12月8日,星期五 

执行高压舱通道2关闭成功！

------------------------------------


Log Entry : 16:47:19 2017年12月8日,星期五 

低压舱执行通道1关闭！

------------------------------------


Log Entry : 16:47:21 2017年12月8日,星期五 

低压舱执行通道1关闭成功！

------------------------------------


Log Entry : 16:47:22 2017年12月8日,星期五 

低压舱执行通道2关闭！

------------------------------------


Log Entry : 16:47:24 2017年12月8日,星期五 

低压舱执行通道2关闭成功！

------------------------------------


Log Entry : 09:05:53 2017年12月11日,星期一 

A舱通道1电压电流上下限设置成功！

------------------------------------


Log Entry : 09:05:55 2017年12月11日,星期一 

A舱通道2电压电流上下限设置成功！

------------------------------------


Log Entry : 09:05:58 2017年12月11日,星期一 

B舱通道1电压电流上下限设置成功！

------------------------------------


Log Entry : 09:06:00 2017年12月11日,星期一 

B舱通道2电压电流上下限设置成功！

------------------------------------


Log Entry : 09:06:06 2017年12月11日,星期一 

低压舱执行通道1打开！

------------------------------------


Log Entry : 09:06:08 2017年12月11日,星期一 

低压舱执行通道1打开成功！

------------------------------------


Log Entry : 09:06:10 2017年12月11日,星期一 

低压舱执行通道2打开！

------------------------------------


Log Entry : 09:06:12 2017年12月11日,星期一 

低压舱执行通道2打开成功！

------------------------------------


Log Entry : 16:38:15 2017年12月11日,星期一 

低压舱执行通道1关闭！

------------------------------------


Log Entry : 16:38:17 2017年12月11日,星期一 

低压舱执行通道1关闭成功！

------------------------------------


Log Entry : 16:38:18 2017年12月11日,星期一 

低压舱执行通道2关闭！

------------------------------------


Log Entry : 16:38:21 2017年12月11日,星期一 

低压舱执行通道2关闭成功！

------------------------------------


Log Entry : 13:09:57 2017年12月12日,星期二 

A舱通道1电压电流上下限设置成功！

------------------------------------


Log Entry : 13:09:59 2017年12月12日,星期二 

A舱通道2电压电流上下限设置成功！

------------------------------------


Log Entry : 13:10:02 2017年12月12日,星期二 

B舱通道1电压电流上下限设置成功！

------------------------------------


Log Entry : 13:10:04 2017年12月12日,星期二 

B舱通道2电压电流上下限设置成功！

------------------------------------


Log Entry : 13:10:08 2017年12月12日,星期二 

低压舱执行通道1打开！

------------------------------------


Log Entry : 13:10:10 2017年12月12日,星期二 

低压舱执行通道1打开成功！

------------------------------------


Log Entry : 13:10:11 2017年12月12日,星期二 

低压舱执行通道2打开！

------------------------------------


Log Entry : 13:10:13 2017年12月12日,星期二 

低压舱执行通道2打开成功！

------------------------------------


Log Entry : 17:02:46 2017年12月12日,星期二 

低压舱执行通道1关闭！

------------------------------------


Log Entry : 17:02:48 2017年12月12日,星期二 

低压舱执行通道1关闭成功！

------------------------------------


Log Entry : 17:02:49 2017年12月12日,星期二 

低压舱执行通道2关闭！

------------------------------------


Log Entry : 17:02:51 2017年12月12日,星期二 

低压舱执行通道2关闭成功！

------------------------------------


Log Entry : 09:18:38 2017年12月13日,星期三 

低压舱执行通道1打开！

------------------------------------


Log Entry : 09:18:40 2017年12月13日,星期三 

低压舱执行通道1打开成功！

------------------------------------


Log Entry : 09:18:41 2017年12月13日,星期三 

低压舱执行通道2打开！

------------------------------------


Log Entry : 09:18:42 2017年12月13日,星期三 

低压舱执行通道2打开成功！

------------------------------------


Log Entry : 09:18:44 2017年12月13日,星期三 

执行高压舱通道1打开！

------------------------------------


Log Entry : 09:18:45 2017年12月13日,星期三 

执行高压舱通道1打开成功！

------------------------------------


Log Entry : 09:18:46 2017年12月13日,星期三 

执行高压舱通道2打开！

------------------------------------


Log Entry : 09:18:48 2017年12月13日,星期三 

执行高压舱通道2打开成功！

------------------------------------


Log Entry : 09:18:52 2017年12月13日,星期三 

B舱通道1电压电流上下限设置成功！

------------------------------------


Log Entry : 09:18:54 2017年12月13日,星期三 

B舱通道2电压电流上下限设置成功！

------------------------------------


Log Entry : 09:19:03 2017年12月13日,星期三 

低压舱执行通道2关闭！

------------------------------------


Log Entry : 09:19:05 2017年12月13日,星期三 

低压舱执行通道2关闭成功！

------------------------------------


Log Entry : 09:19:14 2017年12月13日,星期三 

低压舱执行通道2打开！

------------------------------------


Log Entry : 09:19:16 2017年12月13日,星期三 

低压舱执行通道2打开成功！

------------------------------------


Log Entry : 12:23:13 2017年12月13日,星期三 

低压舱执行通道1关闭！

------------------------------------


Log Entry : 12:23:15 2017年12月13日,星期三 

低压舱执行通道1关闭成功！

------------------------------------


Log Entry : 12:23:18 2017年12月13日,星期三 

低压舱执行通道2关闭！

------------------------------------


Log Entry : 12:23:20 2017年12月13日,星期三 

低压舱执行通道2关闭成功！

------------------------------------


Log Entry : 12:23:23 2017年12月13日,星期三 

执行高压舱通道1关闭！

------------------------------------


Log Entry : 12:23:25 2017年12月13日,星期三 

执行高压舱通道1关闭成功！

------------------------------------


Log Entry : 12:23:26 2017年12月13日,星期三 

执行高压舱通道2关闭！

------------------------------------


Log Entry : 12:23:27 2017年12月13日,星期三 

执行高压舱通道2关闭成功！

------------------------------------


Log Entry : 13:06:51 2017年12月13日,星期三 

A舱通道1电压电流上下限设置成功！

------------------------------------


Log Entry : 13:06:56 2017年12月13日,星期三 

A舱通道2电压电流上下限设置成功！

------------------------------------


Log Entry : 13:06:58 2017年12月13日,星期三 

B舱通道1电压电流上下限设置成功！

------------------------------------


Log Entry : 13:07:01 2017年12月13日,星期三 

B舱通道2电压电流上下限设置成功！

------------------------------------


Log Entry : 13:07:05 2017年12月13日,星期三 

执行高压舱通道1打开！

------------------------------------


Log Entry : 13:07:07 2017年12月13日,星期三 

执行高压舱通道1打开成功！

------------------------------------


Log Entry : 13:07:09 2017年12月13日,星期三 

执行高压舱通道2打开！

------------------------------------


Log Entry : 13:07:11 2017年12月13日,星期三 

执行高压舱通道2打开成功！

------------------------------------


Log Entry : 13:07:12 2017年12月13日,星期三 

低压舱执行通道1打开！

------------------------------------


Log Entry : 13:07:14 2017年12月13日,星期三 

低压舱执行通道1打开成功！

------------------------------------


Log Entry : 13:07:16 2017年12月13日,星期三 

低压舱执行通道2打开！

------------------------------------


Log Entry : 13:07:17 2017年12月13日,星期三 

低压舱执行通道2打开成功！

------------------------------------


Log Entry : 16:55:59 2017年12月13日,星期三 

执行高压舱通道1关闭！

------------------------------------


Log Entry : 16:56:01 2017年12月13日,星期三 

执行高压舱通道1关闭成功！

------------------------------------


Log Entry : 16:56:02 2017年12月13日,星期三 

执行高压舱通道2关闭！

------------------------------------


Log Entry : 16:56:04 2017年12月13日,星期三 

执行高压舱通道2关闭成功！

------------------------------------


Log Entry : 16:56:06 2017年12月13日,星期三 

低压舱执行通道1关闭！

------------------------------------


Log Entry : 16:56:07 2017年12月13日,星期三 

低压舱执行通道1关闭成功！

------------------------------------


Log Entry : 16:56:08 2017年12月13日,星期三 

低压舱执行通道2关闭！

------------------------------------


Log Entry : 16:56:10 2017年12月13日,星期三 

低压舱执行通道2关闭成功！

------------------------------------


Log Entry : 12:37:59 2017年12月14日,星期四 

A舱通道1电压电流上下限设置成功！

------------------------------------


Log Entry : 12:38:01 2017年12月14日,星期四 

A舱通道2电压电流上下限设置成功！

------------------------------------


Log Entry : 12:38:03 2017年12月14日,星期四 

B舱通道1电压电流上下限设置成功！

------------------------------------


Log Entry : 12:38:06 2017年12月14日,星期四 

B舱通道2电压电流上下限设置成功！

------------------------------------


Log Entry : 12:38:08 2017年12月14日,星期四 

执行高压舱通道1打开！

------------------------------------


Log Entry : 12:38:10 2017年12月14日,星期四 

执行高压舱通道1打开成功！

------------------------------------


Log Entry : 12:38:11 2017年12月14日,星期四 

执行高压舱通道2打开！

------------------------------------


Log Entry : 12:38:12 2017年12月14日,星期四 

执行高压舱通道2打开成功！

------------------------------------


Log Entry : 12:38:14 2017年12月14日,星期四 

低压舱执行通道1打开！

------------------------------------


Log Entry : 12:38:16 2017年12月14日,星期四 

低压舱执行通道1打开成功！

------------------------------------


Log Entry : 12:38:17 2017年12月14日,星期四 

低压舱执行通道2打开！

------------------------------------


Log Entry : 12:38:19 2017年12月14日,星期四 

低压舱执行通道2打开成功！

------------------------------------


Log Entry : 14:15:22 2017年12月14日,星期四 

执行高压舱通道1关闭！

------------------------------------


Log Entry : 14:15:24 2017年12月14日,星期四 

执行高压舱通道1关闭成功！

------------------------------------


Log Entry : 14:43:53 2017年12月14日,星期四 

执行高压舱通道2关闭！

------------------------------------


Log Entry : 14:43:56 2017年12月14日,星期四 

执行高压舱通道2关闭成功！

------------------------------------


Log Entry : 17:20:20 2017年12月14日,星期四 

低压舱执行通道1关闭！

------------------------------------


Log Entry : 17:20:21 2017年12月14日,星期四 

低压舱执行通道1关闭成功！

------------------------------------


Log Entry : 17:20:22 2017年12月14日,星期四 

低压舱执行通道2关闭！

------------------------------------


Log Entry : 17:20:24 2017年12月14日,星期四 

低压舱执行通道2关闭成功！

------------------------------------


Log Entry : 15:30:53 2017年12月19日,星期二 

校时指令执行失败！

------------------------------------


Log Entry : 15:31:04 2017年12月19日,星期二 

校时指令执行失败！

------------------------------------


Log Entry : 15:51:24 2017年12月19日,星期二 

校时指令执行成功！

------------------------------------


Log Entry : 15:51:29 2017年12月19日,星期二 

校时指令执行成功！

------------------------------------


Log Entry : 15:55:52 2017年12月19日,星期二 

校时指令执行成功！

------------------------------------


Log Entry : 15:56:53 2017年12月19日,星期二 

B舱通道2电压电流上下限设置失败！

------------------------------------


Log Entry : 15:56:56 2017年12月19日,星期二 

校时指令执行成功！

------------------------------------


Log Entry : 16:49:34 2017年12月19日,星期二 

校时指令执行成功！

------------------------------------


Log Entry : 10:22:51 2017年12月22日,星期五 

执行高压舱通道1打开！

------------------------------------


Log Entry : 10:22:54 2017年12月22日,星期五 

执行高压舱通道1打开成功！

------------------------------------


Log Entry : 10:22:58 2017年12月22日,星期五 

A舱通道1电压电流上下限设置成功！

------------------------------------


Log Entry : 10:23:02 2017年12月22日,星期五 

A舱通道2电压电流上下限设置成功！

------------------------------------


Log Entry : 10:23:05 2017年12月22日,星期五 

B舱通道1电压电流上下限设置成功！

------------------------------------


Log Entry : 10:23:07 2017年12月22日,星期五 

B舱通道2电压电流上下限设置成功！

------------------------------------


Log Entry : 10:23:10 2017年12月22日,星期五 

A舱温度上下限设置成功！

------------------------------------


Log Entry : 10:23:13 2017年12月22日,星期五 

B舱温度上下限设置成功！

------------------------------------


Log Entry : 10:23:34 2017年12月22日,星期五 

执行高压舱通道1关闭！

------------------------------------


Log Entry : 10:23:36 2017年12月22日,星期五 

执行高压舱通道1关闭成功！

------------------------------------


Log Entry : 12:27:47 2017年12月22日,星期五 

B舱通道1电压电流上下限设置成功！

------------------------------------


Log Entry : 12:27:49 2017年12月22日,星期五 

B舱通道2电压电流上下限设置成功！

------------------------------------


Log Entry : 12:27:55 2017年12月22日,星期五 

A舱通道2电压电流上下限设置成功！

------------------------------------


Log Entry : 12:27:58 2017年12月22日,星期五 

A舱通道1电压电流上下限设置成功！

------------------------------------


Log Entry : 12:28:06 2017年12月22日,星期五 

低压舱执行通道1打开！

------------------------------------


Log Entry : 12:28:07 2017年12月22日,星期五 

低压舱执行通道1打开成功！

------------------------------------


Log Entry : 12:28:12 2017年12月22日,星期五 

低压舱执行通道2打开！

------------------------------------


Log Entry : 12:28:14 2017年12月22日,星期五 

低压舱执行通道2打开成功！

------------------------------------


Log Entry : 12:28:27 2017年12月22日,星期五 

校时指令执行成功！

------------------------------------


Log Entry : 12:28:45 2017年12月22日,星期五 

校时指令执行成功！

------------------------------------


Log Entry : 12:34:51 2017年12月22日,星期五 

校时指令执行成功！

------------------------------------


Log Entry : 12:35:07 2017年12月22日,星期五 

校时指令执行成功！

------------------------------------


Log Entry : 13:02:04 2017年12月22日,星期五 

A舱通道1电压电流上下限设置成功！

------------------------------------


Log Entry : 13:02:06 2017年12月22日,星期五 

A舱通道2电压电流上下限设置成功！

------------------------------------


Log Entry : 13:02:09 2017年12月22日,星期五 

A舱温度上下限设置成功！

------------------------------------


Log Entry : 13:02:12 2017年12月22日,星期五 

B舱通道1电压电流上下限设置成功！

------------------------------------


Log Entry : 13:02:15 2017年12月22日,星期五 

B舱通道2电压电流上下限设置成功！

------------------------------------


Log Entry : 13:02:17 2017年12月22日,星期五 

B舱温度上下限设置成功！

------------------------------------


Log Entry : 13:08:59 2017年12月22日,星期五 

执行高压舱通道1打开！

------------------------------------


Log Entry : 13:09:01 2017年12月22日,星期五 

执行高压舱通道1打开成功！

------------------------------------


Log Entry : 13:09:06 2017年12月22日,星期五 

执行高压舱通道2打开！

------------------------------------


Log Entry : 13:09:08 2017年12月22日,星期五 

执行高压舱通道2打开成功！

------------------------------------


Log Entry : 13:09:14 2017年12月22日,星期五 

低压舱执行通道1打开！

------------------------------------


Log Entry : 13:09:15 2017年12月22日,星期五 

低压舱执行通道1打开成功！

------------------------------------


Log Entry : 13:09:17 2017年12月22日,星期五 

低压舱执行通道2打开！

------------------------------------


Log Entry : 13:09:18 2017年12月22日,星期五 

低压舱执行通道2打开成功！

------------------------------------


Log Entry : 13:23:14 2017年12月22日,星期五 

A舱通道1电压电流上下限设置成功！

------------------------------------


Log Entry : 13:23:17 2017年12月22日,星期五 

A舱通道2电压电流上下限设置成功！

------------------------------------


Log Entry : 13:23:19 2017年12月22日,星期五 

B舱通道1电压电流上下限设置成功！

------------------------------------


Log Entry : 13:23:22 2017年12月22日,星期五 

B舱通道2电压电流上下限设置成功！

------------------------------------


Log Entry : 13:23:24 2017年12月22日,星期五 

执行高压舱通道1打开！

------------------------------------


Log Entry : 13:23:28 2017年12月22日,星期五 

执行高压舱通道1打开成功！

------------------------------------


Log Entry : 13:23:29 2017年12月22日,星期五 

执行高压舱通道2打开！

------------------------------------


Log Entry : 13:23:30 2017年12月22日,星期五 

执行高压舱通道2打开成功！

------------------------------------


Log Entry : 13:23:33 2017年12月22日,星期五 

低压舱执行通道1打开！

------------------------------------


Log Entry : 13:23:35 2017年12月22日,星期五 

低压舱执行通道1打开成功！

------------------------------------


Log Entry : 13:23:36 2017年12月22日,星期五 

低压舱执行通道2打开！

------------------------------------


Log Entry : 13:23:38 2017年12月22日,星期五 

低压舱执行通道2打开成功！

------------------------------------


Log Entry : 13:23:43 2017年12月22日,星期五 

校时指令执行成功！

------------------------------------


Log Entry : 13:51:02 2017年12月22日,星期五 

校时指令执行成功！

------------------------------------


Log Entry : 13:52:02 2017年12月22日,星期五 

校时指令执行成功！

------------------------------------


Log Entry : 13:52:14 2017年12月22日,星期五 

校时指令执行成功！

------------------------------------


Log Entry : 13:52:45 2017年12月22日,星期五 

校时指令执行成功！

------------------------------------


Log Entry : 14:39:52 2017年12月22日,星期五 

校时指令执行成功！

------------------------------------


Log Entry : 14:40:01 2017年12月22日,星期五 

校时指令执行成功！

------------------------------------


Log Entry : 14:46:16 2017年12月22日,星期五 

A舱通道1电压电流上下限设置成功！

------------------------------------


Log Entry : 14:46:18 2017年12月22日,星期五 

A舱通道2电压电流上下限设置成功！

------------------------------------


Log Entry : 14:46:21 2017年12月22日,星期五 

B舱通道1电压电流上下限设置成功！

------------------------------------


Log Entry : 14:46:23 2017年12月22日,星期五 

B舱通道2电压电流上下限设置成功！

------------------------------------


Log Entry : 14:46:36 2017年12月22日,星期五 

摄像头打开失败！

------------------------------------


Log Entry : 14:46:50 2017年12月22日,星期五 

校时指令执行成功！

------------------------------------


Log Entry : 14:47:22 2017年12月22日,星期五 

摄像头打开失败！

------------------------------------


Log Entry : 14:47:26 2017年12月22日,星期五 

校时指令执行成功！

------------------------------------


Log Entry : 14:48:37 2017年12月22日,星期五 

摄像头打开失败！

------------------------------------


Log Entry : 14:49:47 2017年12月22日,星期五 

摄像头打开失败！

------------------------------------


Log Entry : 14:50:03 2017年12月22日,星期五 

执行高压舱通道1打开！

------------------------------------


Log Entry : 14:50:05 2017年12月22日,星期五 

执行高压舱通道1打开成功！

------------------------------------


Log Entry : 14:50:07 2017年12月22日,星期五 

执行高压舱通道2打开！

------------------------------------


Log Entry : 14:50:09 2017年12月22日,星期五 

执行高压舱通道2打开成功！

------------------------------------


Log Entry : 14:50:11 2017年12月22日,星期五 

低压舱执行通道1打开！

------------------------------------


Log Entry : 14:50:13 2017年12月22日,星期五 

低压舱执行通道1打开成功！

------------------------------------


Log Entry : 14:50:15 2017年12月22日,星期五 

低压舱执行通道2打开！

------------------------------------


Log Entry : 14:50:17 2017年12月22日,星期五 

低压舱执行通道2打开成功！

------------------------------------


Log Entry : 14:50:44 2017年12月22日,星期五 

校时指令执行成功！

------------------------------------


Log Entry : 14:50:55 2017年12月22日,星期五 

校时指令执行成功！

------------------------------------


Log Entry : 14:51:00 2017年12月22日,星期五 

校时指令执行成功！

------------------------------------


Log Entry : 14:51:09 2017年12月22日,星期五 

校时指令执行成功！

------------------------------------


Log Entry : 14:51:38 2017年12月22日,星期五 

摄像头打开失败！

------------------------------------


Log Entry : 14:52:10 2017年12月22日,星期五 

校时指令执行成功！

------------------------------------


Log Entry : 14:52:31 2017年12月22日,星期五 

摄像头打开失败！

------------------------------------


Log Entry : 14:52:40 2017年12月22日,星期五 

校时指令执行成功！

------------------------------------


Log Entry : 14:52:51 2017年12月22日,星期五 

执行高压舱通道1关闭！

------------------------------------


Log Entry : 14:52:53 2017年12月22日,星期五 

执行高压舱通道1关闭成功！

------------------------------------


Log Entry : 14:52:56 2017年12月22日,星期五 

执行高压舱通道2关闭！

------------------------------------


Log Entry : 14:52:58 2017年12月22日,星期五 

执行高压舱通道2关闭成功！

------------------------------------


Log Entry : 14:53:00 2017年12月22日,星期五 

低压舱执行通道1关闭！

------------------------------------


Log Entry : 14:53:05 2017年12月22日,星期五 

低压舱执行通道1关闭成功！

------------------------------------


Log Entry : 14:53:05 2017年12月22日,星期五 

低压舱执行通道2关闭！

------------------------------------


Log Entry : 14:53:09 2017年12月22日,星期五 

低压舱执行通道2关闭成功！

------------------------------------


Log Entry : 16:04:28 2017年12月22日,星期五 

校时指令执行成功！

------------------------------------


Log Entry : 16:05:42 2017年12月22日,星期五 

校时指令执行成功！

------------------------------------


Log Entry : 16:06:06 2017年12月22日,星期五 

摄像头关闭失败！

------------------------------------


Log Entry : 16:06:50 2017年12月22日,星期五 

A舱通道1电压电流上下限设置成功！

------------------------------------


Log Entry : 16:06:53 2017年12月22日,星期五 

A舱通道2电压电流上下限设置成功！

------------------------------------


Log Entry : 16:06:56 2017年12月22日,星期五 

A舱温度上下限设置成功！

------------------------------------


Log Entry : 16:06:59 2017年12月22日,星期五 

B舱通道1电压电流上下限设置成功！

------------------------------------


Log Entry : 16:07:02 2017年12月22日,星期五 

B舱通道2电压电流上下限设置成功！

------------------------------------


Log Entry : 16:07:06 2017年12月22日,星期五 

B舱温度上下限设置成功！

------------------------------------


Log Entry : 16:07:10 2017年12月22日,星期五 

校时指令执行成功！

------------------------------------


Log Entry : 16:07:24 2017年12月22日,星期五 

执行高压舱通道1打开！

------------------------------------


Log Entry : 16:07:26 2017年12月22日,星期五 

执行高压舱通道1打开成功！

------------------------------------


Log Entry : 16:07:27 2017年12月22日,星期五 

执行高压舱通道2打开！

------------------------------------


Log Entry : 16:07:29 2017年12月22日,星期五 

执行高压舱通道2打开成功！

------------------------------------


Log Entry : 16:07:30 2017年12月22日,星期五 

低压舱执行通道1打开！

------------------------------------


Log Entry : 16:07:33 2017年12月22日,星期五 

低压舱执行通道1打开成功！

------------------------------------


Log Entry : 16:07:35 2017年12月22日,星期五 

低压舱执行通道2打开！

------------------------------------


Log Entry : 16:07:39 2017年12月22日,星期五 

低压舱执行通道2打开成功！

------------------------------------


Log Entry : 16:38:54 2017年12月22日,星期五 

校时指令执行成功！

------------------------------------


Log Entry : 16:43:14 2017年12月22日,星期五 

校时指令执行成功！

------------------------------------


Log Entry : 16:58:52 2017年12月22日,星期五 

执行高压舱通道1关闭！

------------------------------------


Log Entry : 16:58:55 2017年12月22日,星期五 

执行高压舱通道1关闭成功！

------------------------------------


Log Entry : 16:58:55 2017年12月22日,星期五 

执行高压舱通道2关闭！

------------------------------------


Log Entry : 16:58:57 2017年12月22日,星期五 

执行高压舱通道2关闭成功！

------------------------------------


Log Entry : 16:58:58 2017年12月22日,星期五 

低压舱执行通道1关闭！

------------------------------------


Log Entry : 16:58:59 2017年12月22日,星期五 

低压舱执行通道1关闭成功！

------------------------------------


Log Entry : 16:59:00 2017年12月22日,星期五 

低压舱执行通道2关闭！

------------------------------------


Log Entry : 09:23:52 2017年12月25日,星期一 

A舱通道1电压电流上下限设置成功！

------------------------------------


Log Entry : 09:23:54 2017年12月25日,星期一 

A舱通道2电压电流上下限设置成功！

------------------------------------


Log Entry : 09:23:57 2017年12月25日,星期一 

B舱通道1电压电流上下限设置成功！

------------------------------------


Log Entry : 09:24:01 2017年12月25日,星期一 

B舱通道2电压电流上下限设置成功！

------------------------------------


Log Entry : 09:24:05 2017年12月25日,星期一 

校时指令执行成功！

------------------------------------


Log Entry : 09:24:15 2017年12月25日,星期一 

低压舱执行通道1打开！

------------------------------------


Log Entry : 09:24:16 2017年12月25日,星期一 

低压舱执行通道1打开成功！

------------------------------------


Log Entry : 09:24:17 2017年12月25日,星期一 

低压舱执行通道2打开！

------------------------------------


Log Entry : 09:24:19 2017年12月25日,星期一 

低压舱执行通道2打开成功！

------------------------------------


Log Entry : 09:24:21 2017年12月25日,星期一 

执行高压舱通道1打开！

------------------------------------


Log Entry : 09:24:22 2017年12月25日,星期一 

执行高压舱通道1打开成功！

------------------------------------


Log Entry : 09:24:23 2017年12月25日,星期一 

执行高压舱通道2打开！

------------------------------------


Log Entry : 09:24:25 2017年12月25日,星期一 

执行高压舱通道2打开成功！

------------------------------------


Log Entry : 12:26:07 2017年12月25日,星期一 

执行高压舱通道1关闭！

------------------------------------


Log Entry : 12:26:08 2017年12月25日,星期一 

执行高压舱通道1关闭成功！

------------------------------------


Log Entry : 12:26:09 2017年12月25日,星期一 

执行高压舱通道2关闭！

------------------------------------


Log Entry : 12:26:11 2017年12月25日,星期一 

执行高压舱通道2关闭成功！

------------------------------------


Log Entry : 12:26:12 2017年12月25日,星期一 

低压舱执行通道1关闭！

------------------------------------


Log Entry : 12:26:14 2017年12月25日,星期一 

低压舱执行通道1关闭成功！

------------------------------------


Log Entry : 12:26:15 2017年12月25日,星期一 

低压舱执行通道2关闭！

------------------------------------


Log Entry : 12:26:16 2017年12月25日,星期一 

低压舱执行通道2关闭成功！

------------------------------------


Log Entry : 12:26:22 2017年12月25日,星期一 

校时指令执行成功！

------------------------------------


Log Entry : 13:09:56 2017年12月25日,星期一 

校时指令执行成功！

------------------------------------


Log Entry : 13:10:00 2017年12月25日,星期一 

执行高压舱通道1打开！

------------------------------------


Log Entry : 13:10:02 2017年12月25日,星期一 

执行高压舱通道1打开成功！

------------------------------------


Log Entry : 13:10:03 2017年12月25日,星期一 

执行高压舱通道2打开！

------------------------------------


Log Entry : 13:10:05 2017年12月25日,星期一 

执行高压舱通道2打开成功！

------------------------------------


Log Entry : 13:10:06 2017年12月25日,星期一 

低压舱执行通道1打开！

------------------------------------


Log Entry : 13:10:07 2017年12月25日,星期一 

低压舱执行通道1打开成功！

------------------------------------


Log Entry : 13:10:08 2017年12月25日,星期一 

低压舱执行通道2打开！

------------------------------------


Log Entry : 13:10:10 2017年12月25日,星期一 

低压舱执行通道2打开成功！

------------------------------------


Log Entry : 13:43:48 2017年12月25日,星期一 

A舱通道1电压电流上下限设置成功！

------------------------------------


Log Entry : 13:43:55 2017年12月25日,星期一 

校时指令执行成功！

------------------------------------


Log Entry : 17:07:16 2017年12月25日,星期一 

执行高压舱通道1关闭！

------------------------------------


Log Entry : 17:07:19 2017年12月25日,星期一 

执行高压舱通道1关闭成功！

------------------------------------


Log Entry : 17:07:20 2017年12月25日,星期一 

执行高压舱通道2关闭！

------------------------------------


Log Entry : 17:07:27 2017年12月25日,星期一 

执行高压舱通道2关闭成功！

------------------------------------


Log Entry : 17:07:30 2017年12月25日,星期一 

低压舱执行通道1关闭！

------------------------------------


Log Entry : 17:07:32 2017年12月25日,星期一 

低压舱执行通道1关闭成功！

------------------------------------


Log Entry : 17:07:33 2017年12月25日,星期一 

低压舱执行通道2关闭！

------------------------------------


Log Entry : 17:07:36 2017年12月25日,星期一 

低压舱执行通道2关闭成功！

------------------------------------


Log Entry : 09:12:39 2017年12月26日,星期二 

校时指令执行成功！

------------------------------------


Log Entry : 09:12:45 2017年12月26日,星期二 

B舱通道2电压电流上下限设置成功！

------------------------------------


Log Entry : 09:12:47 2017年12月26日,星期二 

A舱通道2电压电流上下限设置成功！

------------------------------------


Log Entry : 09:12:51 2017年12月26日,星期二 

A舱通道1电压电流上下限设置成功！

------------------------------------


Log Entry : 09:14:47 2017年12月26日,星期二 

执行高压舱通道1打开！

------------------------------------


Log Entry : 09:14:48 2017年12月26日,星期二 

执行高压舱通道1打开成功！

------------------------------------


Log Entry : 09:14:50 2017年12月26日,星期二 

执行高压舱通道2打开！

------------------------------------


Log Entry : 09:14:51 2017年12月26日,星期二 

执行高压舱通道2打开成功！

------------------------------------


Log Entry : 09:14:52 2017年12月26日,星期二 

低压舱执行通道1打开！

------------------------------------


Log Entry : 09:14:54 2017年12月26日,星期二 

低压舱执行通道1打开成功！

------------------------------------


Log Entry : 09:14:55 2017年12月26日,星期二 

低压舱执行通道2打开！

------------------------------------


Log Entry : 09:14:56 2017年12月26日,星期二 

低压舱执行通道2打开成功！

------------------------------------


Log Entry : 09:45:35 2017年12月26日,星期二 

校时指令执行成功！

------------------------------------


Log Entry : 11:59:26 2017年12月26日,星期二 

执行高压舱通道1打开！

------------------------------------


Log Entry : 11:59:28 2017年12月26日,星期二 

执行高压舱通道1打开成功！

------------------------------------


Log Entry : 11:59:29 2017年12月26日,星期二 

执行高压舱通道2打开！

------------------------------------


Log Entry : 11:59:31 2017年12月26日,星期二 

执行高压舱通道2打开成功！

------------------------------------


Log Entry : 11:59:32 2017年12月26日,星期二 

低压舱执行通道1打开！

------------------------------------


Log Entry : 11:59:35 2017年12月26日,星期二 

低压舱执行通道1打开成功！

------------------------------------


Log Entry : 11:59:37 2017年12月26日,星期二 

低压舱执行通道2打开！

------------------------------------


Log Entry : 11:59:39 2017年12月26日,星期二 

低压舱执行通道2打开成功！

------------------------------------


Log Entry : 12:00:04 2017年12月26日,星期二 

执行高压舱通道1关闭！

------------------------------------


Log Entry : 12:00:05 2017年12月26日,星期二 

执行高压舱通道1关闭成功！

------------------------------------


Log Entry : 12:00:06 2017年12月26日,星期二 

执行高压舱通道2关闭！

------------------------------------


Log Entry : 12:00:08 2017年12月26日,星期二 

执行高压舱通道2关闭成功！

------------------------------------


Log Entry : 12:00:09 2017年12月26日,星期二 

低压舱执行通道1关闭！

------------------------------------


Log Entry : 12:00:10 2017年12月26日,星期二 

低压舱执行通道1关闭成功！

------------------------------------


Log Entry : 12:00:11 2017年12月26日,星期二 

低压舱执行通道2关闭！

------------------------------------


Log Entry : 12:00:13 2017年12月26日,星期二 

低压舱执行通道2关闭成功！

------------------------------------


Log Entry : 12:00:33 2017年12月26日,星期二 

校时指令执行成功！

------------------------------------


Log Entry : 14:28:06 2017年12月26日,星期二 

A舱通道1电压电流上下限设置成功！

------------------------------------


Log Entry : 14:28:09 2017年12月26日,星期二 

A舱通道2电压电流上下限设置成功！

------------------------------------


Log Entry : 14:28:13 2017年12月26日,星期二 

A舱温度上下限设置成功！

------------------------------------


Log Entry : 14:28:16 2017年12月26日,星期二 

B舱通道1电压电流上下限设置成功！

------------------------------------


Log Entry : 14:28:17 2017年12月26日,星期二 

A舱温度上下限设置成功！

------------------------------------


Log Entry : 14:28:20 2017年12月26日,星期二 

B舱通道2电压电流上下限设置成功！

------------------------------------


Log Entry : 14:28:24 2017年12月26日,星期二 

B舱温度上下限设置成功！

------------------------------------


Log Entry : 14:28:28 2017年12月26日,星期二 

校时指令执行成功！

------------------------------------


Log Entry : 14:28:39 2017年12月26日,星期二 

执行高压舱通道1打开！

------------------------------------


Log Entry : 14:28:42 2017年12月26日,星期二 

执行高压舱通道1打开成功！

------------------------------------


Log Entry : 14:28:44 2017年12月26日,星期二 

执行高压舱通道2打开！

------------------------------------


Log Entry : 14:28:46 2017年12月26日,星期二 

执行高压舱通道2打开成功！

------------------------------------


Log Entry : 14:28:48 2017年12月26日,星期二 

低压舱执行通道1打开！

------------------------------------


Log Entry : 14:28:51 2017年12月26日,星期二 

低压舱执行通道1打开成功！

------------------------------------


Log Entry : 14:28:54 2017年12月26日,星期二 

低压舱执行通道2打开！

------------------------------------


Log Entry : 14:28:56 2017年12月26日,星期二 

低压舱执行通道2打开成功！

------------------------------------


Log Entry : 16:32:37 2017年12月26日,星期二 

校时指令执行成功！

------------------------------------


Log Entry : 16:44:36 2017年12月26日,星期二 

执行高压舱通道1关闭！

------------------------------------


Log Entry : 16:44:39 2017年12月26日,星期二 

执行高压舱通道1关闭成功！

------------------------------------


Log Entry : 16:44:40 2017年12月26日,星期二 

执行高压舱通道2关闭！

------------------------------------


Log Entry : 16:44:41 2017年12月26日,星期二 

执行高压舱通道2关闭成功！

------------------------------------


Log Entry : 16:44:42 2017年12月26日,星期二 

低压舱执行通道1关闭！

------------------------------------


Log Entry : 16:44:44 2017年12月26日,星期二 

低压舱执行通道1关闭成功！

------------------------------------


Log Entry : 16:44:44 2017年12月26日,星期二 

低压舱执行通道2关闭！

------------------------------------


Log Entry : 16:44:46 2017年12月26日,星期二 

低压舱执行通道2关闭成功！

------------------------------------


Log Entry : 16:51:15 2017年12月26日,星期二 

校时指令执行成功！

------------------------------------


Log Entry : 16:55:06 2017年12月26日,星期二 

校时指令执行成功！

------------------------------------


Log Entry : 11:19:41 2017年12月27日,星期三 

A舱通道1电压电流上下限设置成功！

------------------------------------


Log Entry : 11:19:43 2017年12月27日,星期三 

A舱通道2电压电流上下限设置成功！

------------------------------------


Log Entry : 11:19:46 2017年12月27日,星期三 

A舱温度上下限设置成功！

------------------------------------


Log Entry : 11:19:48 2017年12月27日,星期三 

B舱通道1电压电流上下限设置成功！

------------------------------------


Log Entry : 11:19:50 2017年12月27日,星期三 

B舱通道2电压电流上下限设置成功！

------------------------------------


Log Entry : 11:19:54 2017年12月27日,星期三 

B舱温度上下限设置成功！

------------------------------------


Log Entry : 11:19:59 2017年12月27日,星期三 

校时指令执行成功！

------------------------------------


Log Entry : 11:20:05 2017年12月27日,星期三 

执行高压舱通道1打开！

------------------------------------


Log Entry : 11:20:07 2017年12月27日,星期三 

执行高压舱通道1打开成功！

------------------------------------


Log Entry : 11:20:09 2017年12月27日,星期三 

执行高压舱通道2打开！

------------------------------------


Log Entry : 11:20:11 2017年12月27日,星期三 

执行高压舱通道2打开成功！

------------------------------------


Log Entry : 11:20:12 2017年12月27日,星期三 

低压舱执行通道1打开！

------------------------------------


Log Entry : 11:20:13 2017年12月27日,星期三 

低压舱执行通道1打开成功！

------------------------------------


Log Entry : 11:20:15 2017年12月27日,星期三 

低压舱执行通道2打开！

------------------------------------


Log Entry : 11:20:17 2017年12月27日,星期三 

低压舱执行通道2打开成功！

------------------------------------


Log Entry : 11:52:12 2017年12月27日,星期三 

执行高压舱通道1关闭！

------------------------------------


Log Entry : 11:52:14 2017年12月27日,星期三 

执行高压舱通道1关闭成功！

------------------------------------


Log Entry : 11:52:15 2017年12月27日,星期三 

执行高压舱通道2关闭！

------------------------------------


Log Entry : 11:52:17 2017年12月27日,星期三 

执行高压舱通道2关闭成功！

------------------------------------


Log Entry : 11:52:18 2017年12月27日,星期三 

低压舱执行通道1关闭！

------------------------------------


Log Entry : 11:52:20 2017年12月27日,星期三 

低压舱执行通道1关闭成功！

------------------------------------


Log Entry : 11:52:21 2017年12月27日,星期三 

低压舱执行通道2关闭！

------------------------------------


Log Entry : 11:52:22 2017年12月27日,星期三 

低压舱执行通道2关闭成功！

------------------------------------


Log Entry : 11:52:28 2017年12月27日,星期三 

校时指令执行成功！

------------------------------------


Log Entry : 13:06:43 2017年12月27日,星期三 

校时指令执行成功！

------------------------------------


Log Entry : 13:07:04 2017年12月27日,星期三 

低压舱执行通道1打开！

------------------------------------


Log Entry : 13:07:06 2017年12月27日,星期三 

低压舱执行通道1打开成功！

------------------------------------


Log Entry : 13:07:07 2017年12月27日,星期三 

低压舱执行通道2打开！

------------------------------------


Log Entry : 13:07:08 2017年12月27日,星期三 

低压舱执行通道2打开成功！

------------------------------------


Log Entry : 13:07:10 2017年12月27日,星期三 

执行高压舱通道2打开！

------------------------------------


Log Entry : 13:07:11 2017年12月27日,星期三 

执行高压舱通道2打开成功！

------------------------------------


Log Entry : 13:41:46 2017年12月27日,星期三 

校时指令执行成功！

------------------------------------


Log Entry : 13:41:49 2017年12月27日,星期三 

校时指令执行成功！

------------------------------------


Log Entry : 13:56:28 2017年12月27日,星期三 

执行高压舱通道1打开！

------------------------------------


Log Entry : 13:56:30 2017年12月27日,星期三 

执行高压舱通道1打开成功！

------------------------------------


Log Entry : 13:56:38 2017年12月27日,星期三 

执行高压舱通道2打开！

------------------------------------


Log Entry : 13:56:41 2017年12月27日,星期三 

执行高压舱通道2打开成功！

------------------------------------


Log Entry : 13:58:22 2017年12月27日,星期三 

校时指令执行成功！

------------------------------------


Log Entry : 13:58:29 2017年12月27日,星期三 

校时指令执行成功！

------------------------------------


Log Entry : 13:58:42 2017年12月27日,星期三 

校时指令执行成功！

------------------------------------


Log Entry : 13:58:46 2017年12月27日,星期三 

执行高压舱通道1打开！

------------------------------------


Log Entry : 13:58:48 2017年12月27日,星期三 

执行高压舱通道1打开成功！

------------------------------------


Log Entry : 13:58:50 2017年12月27日,星期三 

执行高压舱通道2打开！

------------------------------------


Log Entry : 13:58:50 2017年12月27日,星期三 

执行高压舱通道2打开！

------------------------------------


Log Entry : 13:58:51 2017年12月27日,星期三 

执行高压舱通道2打开成功！

------------------------------------


Log Entry : 13:58:52 2017年12月27日,星期三 

低压舱执行通道1打开！

------------------------------------


Log Entry : 13:58:54 2017年12月27日,星期三 

低压舱执行通道1打开成功！

------------------------------------


Log Entry : 13:58:55 2017年12月27日,星期三 

执行高压舱通道2打开成功！

------------------------------------


Log Entry : 13:58:56 2017年12月27日,星期三 

低压舱执行通道2打开！

------------------------------------


Log Entry : 13:58:58 2017年12月27日,星期三 

低压舱执行通道2打开成功！

------------------------------------


Log Entry : 13:59:00 2017年12月27日,星期三 

执行高压舱通道1关闭！

------------------------------------


Log Entry : 13:59:02 2017年12月27日,星期三 

执行高压舱通道1关闭成功！

------------------------------------


Log Entry : 13:59:02 2017年12月27日,星期三 

执行高压舱通道2关闭！

------------------------------------


Log Entry : 13:59:04 2017年12月27日,星期三 

执行高压舱通道2关闭成功！

------------------------------------


Log Entry : 13:59:04 2017年12月27日,星期三 

低压舱执行通道1关闭！

------------------------------------


Log Entry : 13:59:06 2017年12月27日,星期三 

低压舱执行通道1关闭成功！

------------------------------------


Log Entry : 13:59:07 2017年12月27日,星期三 

低压舱执行通道2关闭！

------------------------------------


Log Entry : 13:59:09 2017年12月27日,星期三 

低压舱执行通道2关闭成功！

------------------------------------


Log Entry : 17:02:42 2017年12月27日,星期三 

执行高压舱通道1打开！

------------------------------------


Log Entry : 17:02:45 2017年12月27日,星期三 

执行高压舱通道1打开成功！

------------------------------------


Log Entry : 17:02:48 2017年12月27日,星期三 

执行高压舱通道2打开！

------------------------------------


Log Entry : 17:02:50 2017年12月27日,星期三 

执行高压舱通道2打开成功！

------------------------------------


Log Entry : 17:02:53 2017年12月27日,星期三 

低压舱执行通道1打开！

------------------------------------


Log Entry : 17:02:56 2017年12月27日,星期三 

低压舱执行通道1打开成功！

------------------------------------


Log Entry : 17:02:57 2017年12月27日,星期三 

低压舱执行通道2打开！

------------------------------------


Log Entry : 17:03:03 2017年12月27日,星期三 

低压舱执行通道2打开成功！

------------------------------------


Log Entry : 17:10:27 2017年12月27日,星期三 

执行高压舱通道2关闭！

------------------------------------


Log Entry : 17:10:30 2017年12月27日,星期三 

执行高压舱通道2关闭成功！

------------------------------------


Log Entry : 17:10:31 2017年12月27日,星期三 

执行高压舱通道1关闭！

------------------------------------


Log Entry : 17:10:33 2017年12月27日,星期三 

执行高压舱通道1关闭成功！

------------------------------------


Log Entry : 17:10:36 2017年12月27日,星期三 

低压舱执行通道2关闭！

------------------------------------


Log Entry : 17:10:38 2017年12月27日,星期三 

低压舱执行通道2关闭成功！

------------------------------------


Log Entry : 17:10:39 2017年12月27日,星期三 

低压舱执行通道1关闭！

------------------------------------


Log Entry : 17:10:41 2017年12月27日,星期三 

低压舱执行通道1关闭成功！

------------------------------------


Log Entry : 09:16:38 2017年12月28日,星期四 

A舱温度上下限设置成功！

------------------------------------


Log Entry : 09:16:41 2017年12月28日,星期四 

B舱通道2电压电流上下限设置成功！

------------------------------------


Log Entry : 09:16:43 2017年12月28日,星期四 

B舱通道1电压电流上下限设置成功！

------------------------------------


Log Entry : 09:16:46 2017年12月28日,星期四 

A舱通道1电压电流上下限设置成功！

------------------------------------


Log Entry : 09:16:48 2017年12月28日,星期四 

A舱通道2电压电流上下限设置成功！

------------------------------------


Log Entry : 09:16:53 2017年12月28日,星期四 

校时指令执行成功！

------------------------------------


Log Entry : 09:16:57 2017年12月28日,星期四 

A舱通道1电压电流上下限设置成功！

------------------------------------


Log Entry : 09:16:59 2017年12月28日,星期四 

执行高压舱通道1打开！

------------------------------------


Log Entry : 09:17:01 2017年12月28日,星期四 

执行高压舱通道1打开成功！

------------------------------------


Log Entry : 09:17:02 2017年12月28日,星期四 

执行高压舱通道2打开！

------------------------------------


Log Entry : 09:17:04 2017年12月28日,星期四 

执行高压舱通道2打开成功！

------------------------------------


Log Entry : 09:17:05 2017年12月28日,星期四 

低压舱执行通道1打开！

------------------------------------


Log Entry : 09:17:07 2017年12月28日,星期四 

低压舱执行通道1打开成功！

------------------------------------


Log Entry : 09:17:08 2017年12月28日,星期四 

低压舱执行通道2打开！

------------------------------------


Log Entry : 09:17:10 2017年12月28日,星期四 

低压舱执行通道2打开成功！

------------------------------------


Log Entry : 11:38:47 2017年12月28日,星期四 

执行高压舱通道1关闭！

------------------------------------


Log Entry : 11:38:49 2017年12月28日,星期四 

执行高压舱通道1关闭成功！

------------------------------------


Log Entry : 11:38:50 2017年12月28日,星期四 

执行高压舱通道2关闭！

------------------------------------


Log Entry : 11:38:52 2017年12月28日,星期四 

执行高压舱通道2关闭成功！

------------------------------------


Log Entry : 11:38:53 2017年12月28日,星期四 

低压舱执行通道1关闭！

------------------------------------


Log Entry : 11:38:54 2017年12月28日,星期四 

低压舱执行通道1关闭成功！

------------------------------------


Log Entry : 11:38:55 2017年12月28日,星期四 

低压舱执行通道2关闭！

------------------------------------


Log Entry : 11:38:57 2017年12月28日,星期四 

低压舱执行通道2关闭成功！

------------------------------------


Log Entry : 11:39:01 2017年12月28日,星期四 

校时指令执行成功！

------------------------------------


Log Entry : 09:02:33 2017年12月29日,星期五 

A舱通道1电压电流上下限设置成功！

------------------------------------


Log Entry : 09:02:35 2017年12月29日,星期五 

A舱通道2电压电流上下限设置成功！

------------------------------------


Log Entry : 09:02:37 2017年12月29日,星期五 

B舱通道1电压电流上下限设置成功！

------------------------------------


Log Entry : 09:02:40 2017年12月29日,星期五 

B舱通道2电压电流上下限设置成功！

------------------------------------


Log Entry : 09:02:42 2017年12月29日,星期五 

校时指令执行成功！

------------------------------------


Log Entry : 09:02:49 2017年12月29日,星期五 

校时指令执行成功！

------------------------------------


Log Entry : 09:02:59 2017年12月29日,星期五 

执行高压舱通道1打开！

------------------------------------


Log Entry : 09:03:00 2017年12月29日,星期五 

执行高压舱通道1打开成功！

------------------------------------


Log Entry : 09:03:01 2017年12月29日,星期五 

执行高压舱通道2打开！

------------------------------------


Log Entry : 09:03:03 2017年12月29日,星期五 

执行高压舱通道2打开成功！

------------------------------------


Log Entry : 09:03:04 2017年12月29日,星期五 

低压舱执行通道1打开！

------------------------------------


Log Entry : 09:03:05 2017年12月29日,星期五 

低压舱执行通道1打开成功！

------------------------------------


Log Entry : 09:03:06 2017年12月29日,星期五 

低压舱执行通道2打开！

------------------------------------


Log Entry : 09:03:08 2017年12月29日,星期五 

低压舱执行通道2打开成功！

------------------------------------


Log Entry : 09:04:58 2017年12月29日,星期五 

执行高压舱通道1打开！

------------------------------------


Log Entry : 09:05:00 2017年12月29日,星期五 

执行高压舱通道1打开成功！

------------------------------------


Log Entry : 09:05:11 2017年12月29日,星期五 

执行高压舱通道1关闭！

------------------------------------


Log Entry : 09:05:13 2017年12月29日,星期五 

执行高压舱通道1关闭成功！

------------------------------------


Log Entry : 09:05:21 2017年12月29日,星期五 

低压舱执行通道1关闭！

------------------------------------


Log Entry : 09:05:22 2017年12月29日,星期五 

低压舱执行通道1关闭成功！

------------------------------------


Log Entry : 09:05:23 2017年12月29日,星期五 

低压舱执行通道2关闭！

------------------------------------


Log Entry : 09:05:25 2017年12月29日,星期五 

低压舱执行通道2关闭成功！

------------------------------------


Log Entry : 09:05:42 2017年12月29日,星期五 

A舱通道1电压电流上下限设置成功！

------------------------------------


Log Entry : 09:05:46 2017年12月29日,星期五 

A舱通道2电压电流上下限设置成功！

------------------------------------


Log Entry : 09:06:06 2017年12月29日,星期五 

校时指令执行成功！

------------------------------------


Log Entry : 09:10:11 2017年12月29日,星期五 

执行高压舱通道2打开！

------------------------------------


Log Entry : 09:10:14 2017年12月29日,星期五 

执行高压舱通道2打开成功！

------------------------------------


Log Entry : 09:10:21 2017年12月29日,星期五 

执行高压舱通道1打开！

------------------------------------


Log Entry : 09:10:23 2017年12月29日,星期五 

执行高压舱通道1打开成功！

------------------------------------


Log Entry : 09:13:45 2017年12月29日,星期五 

执行高压舱通道1打开！

------------------------------------


Log Entry : 09:13:48 2017年12月29日,星期五 

执行高压舱通道1打开成功！

------------------------------------


Log Entry : 09:13:48 2017年12月29日,星期五 

执行高压舱通道2打开！

------------------------------------


Log Entry : 09:13:50 2017年12月29日,星期五 

执行高压舱通道2打开成功！

------------------------------------


Log Entry : 09:14:23 2017年12月29日,星期五 

执行高压舱通道1打开！

------------------------------------


Log Entry : 09:14:24 2017年12月29日,星期五 

执行高压舱通道1打开成功！

------------------------------------


Log Entry : 09:14:25 2017年12月29日,星期五 

执行高压舱通道2打开！

------------------------------------


Log Entry : 09:14:29 2017年12月29日,星期五 

执行高压舱通道2打开成功！

------------------------------------


Log Entry : 09:14:30 2017年12月29日,星期五 

执行高压舱通道1关闭！

------------------------------------


Log Entry : 09:14:32 2017年12月29日,星期五 

执行高压舱通道1关闭成功！

------------------------------------


Log Entry : 09:14:33 2017年12月29日,星期五 

执行高压舱通道2关闭！

------------------------------------


Log Entry : 09:14:35 2017年12月29日,星期五 

执行高压舱通道2关闭成功！

------------------------------------


Log Entry : 10:53:24 2017年12月29日,星期五 

A舱通道1电压电流上下限设置成功！

------------------------------------


Log Entry : 10:53:27 2017年12月29日,星期五 

A舱通道2电压电流上下限设置成功！

------------------------------------


Log Entry : 10:53:29 2017年12月29日,星期五 

B舱通道1电压电流上下限设置成功！

------------------------------------


Log Entry : 10:53:31 2017年12月29日,星期五 

B舱通道2电压电流上下限设置成功！

------------------------------------


Log Entry : 10:53:35 2017年12月29日,星期五 

校时指令执行成功！

------------------------------------


Log Entry : 10:53:38 2017年12月29日,星期五 

执行高压舱通道1打开！

------------------------------------


Log Entry : 10:53:40 2017年12月29日,星期五 

执行高压舱通道1打开成功！

------------------------------------


Log Entry : 10:53:44 2017年12月29日,星期五 

执行高压舱通道2打开！

------------------------------------


Log Entry : 10:53:46 2017年12月29日,星期五 

执行高压舱通道2打开成功！

------------------------------------


Log Entry : 10:53:47 2017年12月29日,星期五 

低压舱执行通道1打开！

------------------------------------


Log Entry : 10:53:51 2017年12月29日,星期五 

低压舱执行通道1打开成功！

------------------------------------


Log Entry : 10:53:52 2017年12月29日,星期五 

低压舱执行通道2打开！

------------------------------------


Log Entry : 10:53:54 2017年12月29日,星期五 

低压舱执行通道2打开成功！

------------------------------------


Log Entry : 16:41:57 2017年12月29日,星期五 

执行高压舱通道1关闭！

------------------------------------


Log Entry : 16:41:59 2017年12月29日,星期五 

执行高压舱通道1关闭成功！

------------------------------------


Log Entry : 16:42:00 2017年12月29日,星期五 

执行高压舱通道2关闭！

------------------------------------


Log Entry : 16:42:01 2017年12月29日,星期五 

执行高压舱通道2关闭成功！

------------------------------------


Log Entry : 16:42:02 2017年12月29日,星期五 

低压舱执行通道1关闭！

------------------------------------


Log Entry : 16:42:04 2017年12月29日,星期五 

低压舱执行通道1关闭成功！

------------------------------------


Log Entry : 16:42:05 2017年12月29日,星期五 

低压舱执行通道2关闭！

------------------------------------


Log Entry : 16:42:06 2017年12月29日,星期五 

低压舱执行通道2关闭成功！

------------------------------------


Log Entry : 16:42:11 2017年12月29日,星期五 

校时指令执行成功！

------------------------------------


Log Entry : 10:16:53 2018年1月5日,星期五 

A舱通道1电压电流上下限设置成功！

------------------------------------


Log Entry : 10:16:56 2018年1月5日,星期五 

A舱通道2电压电流上下限设置成功！

------------------------------------


Log Entry : 10:16:59 2018年1月5日,星期五 

A舱温度上下限设置成功！

------------------------------------


Log Entry : 10:17:01 2018年1月5日,星期五 

B舱通道1电压电流上下限设置成功！

------------------------------------


Log Entry : 10:17:04 2018年1月5日,星期五 

B舱通道2电压电流上下限设置成功！

------------------------------------


Log Entry : 10:17:06 2018年1月5日,星期五 

B舱温度上下限设置成功！

------------------------------------


Log Entry : 10:18:10 2018年1月5日,星期五 

执行高压舱通道1打开！

------------------------------------


Log Entry : 10:18:12 2018年1月5日,星期五 

执行高压舱通道1打开成功！

------------------------------------


Log Entry : 10:18:39 2018年1月5日,星期五 

执行高压舱通道2打开！

------------------------------------


Log Entry : 10:18:41 2018年1月5日,星期五 

执行高压舱通道2打开成功！

------------------------------------


Log Entry : 10:18:45 2018年1月5日,星期五 

低压舱执行通道1打开！

------------------------------------


Log Entry : 10:18:47 2018年1月5日,星期五 

低压舱执行通道1打开成功！

------------------------------------


Log Entry : 10:18:50 2018年1月5日,星期五 

低压舱执行通道2打开！

------------------------------------


Log Entry : 10:18:52 2018年1月5日,星期五 

低压舱执行通道2打开成功！

------------------------------------


Log Entry : 10:19:47 2018年1月5日,星期五 

执行高压舱通道1打开！

------------------------------------


Log Entry : 10:19:48 2018年1月5日,星期五 

执行高压舱通道1打开成功！

------------------------------------


Log Entry : 10:19:49 2018年1月5日,星期五 

执行高压舱通道2打开！

------------------------------------


Log Entry : 10:19:51 2018年1月5日,星期五 

执行高压舱通道2打开成功！

------------------------------------


Log Entry : 10:19:53 2018年1月5日,星期五 

低压舱执行通道1打开！

------------------------------------


Log Entry : 10:19:55 2018年1月5日,星期五 

低压舱执行通道1打开成功！

------------------------------------


Log Entry : 10:19:56 2018年1月5日,星期五 

低压舱执行通道2打开！

------------------------------------


Log Entry : 10:19:58 2018年1月5日,星期五 

低压舱执行通道2打开成功！

------------------------------------


Log Entry : 10:20:04 2018年1月5日,星期五 

执行高压舱通道1关闭！

------------------------------------


Log Entry : 10:20:05 2018年1月5日,星期五 

执行高压舱通道1关闭成功！

------------------------------------


Log Entry : 10:20:10 2018年1月5日,星期五 

执行高压舱通道2关闭！

------------------------------------


Log Entry : 10:20:12 2018年1月5日,星期五 

执行高压舱通道2关闭成功！

------------------------------------


Log Entry : 10:20:17 2018年1月5日,星期五 

低压舱执行通道1关闭！

------------------------------------


Log Entry : 10:20:19 2018年1月5日,星期五 

低压舱执行通道1关闭成功！

------------------------------------


Log Entry : 10:20:21 2018年1月5日,星期五 

低压舱执行通道2关闭！

------------------------------------


Log Entry : 10:20:23 2018年1月5日,星期五 

低压舱执行通道2关闭成功！

------------------------------------


Log Entry : 10:27:26 2018年1月5日,星期五 

A舱温度上下限设置成功！

------------------------------------


Log Entry : 10:27:43 2018年1月5日,星期五 

A舱温度上下限设置成功！

------------------------------------


Log Entry : 10:27:49 2018年1月5日,星期五 

A舱通道1电压电流上下限设置成功！

------------------------------------


Log Entry : 10:27:52 2018年1月5日,星期五 

A舱通道2电压电流上下限设置成功！

------------------------------------


Log Entry : 10:27:55 2018年1月5日,星期五 

B舱通道1电压电流上下限设置成功！

------------------------------------


Log Entry : 10:27:58 2018年1月5日,星期五 

B舱通道2电压电流上下限设置成功！

------------------------------------


Log Entry : 10:28:29 2018年1月5日,星期五 

B舱温度上下限设置成功！

------------------------------------


Log Entry : 19:32:36 2018年1月5日,星期五 

校时指令执行成功！

------------------------------------


Log Entry : 19:32:42 2018年1月5日,星期五 

A舱通道1电压电流上下限设置成功！

------------------------------------


Log Entry : 19:32:45 2018年1月5日,星期五 

A舱通道2电压电流上下限设置成功！

------------------------------------


Log Entry : 19:32:48 2018年1月5日,星期五 

A舱温度上下限设置成功！

------------------------------------


Log Entry : 19:32:50 2018年1月5日,星期五 

B舱通道1电压电流上下限设置成功！

------------------------------------


Log Entry : 19:32:53 2018年1月5日,星期五 

B舱通道2电压电流上下限设置成功！

------------------------------------


Log Entry : 19:32:56 2018年1月5日,星期五 

B舱温度上下限设置成功！

------------------------------------


Log Entry : 19:33:00 2018年1月5日,星期五 

执行高压舱通道1打开！

------------------------------------


Log Entry : 19:33:02 2018年1月5日,星期五 

执行高压舱通道1打开成功！

------------------------------------


Log Entry : 19:33:04 2018年1月5日,星期五 

执行高压舱通道2打开！

------------------------------------


Log Entry : 19:33:05 2018年1月5日,星期五 

执行高压舱通道2打开成功！

------------------------------------


Log Entry : 19:33:07 2018年1月5日,星期五 

低压舱执行通道1打开！

------------------------------------


Log Entry : 19:33:10 2018年1月5日,星期五 

低压舱执行通道1打开成功！

------------------------------------


Log Entry : 19:33:11 2018年1月5日,星期五 

低压舱执行通道2打开！

------------------------------------


Log Entry : 19:33:12 2018年1月5日,星期五 

低压舱执行通道2打开成功！

------------------------------------


Log Entry : 19:33:51 2018年1月5日,星期五 

校时指令执行成功！

------------------------------------


Log Entry : 19:35:35 2018年1月5日,星期五 

执行高压舱通道1关闭！

------------------------------------


Log Entry : 19:35:38 2018年1月5日,星期五 

执行高压舱通道1关闭成功！

------------------------------------


Log Entry : 19:35:38 2018年1月5日,星期五 

执行高压舱通道2关闭！

------------------------------------


Log Entry : 19:35:41 2018年1月5日,星期五 

执行高压舱通道2关闭成功！

------------------------------------


Log Entry : 19:35:42 2018年1月5日,星期五 

低压舱执行通道1关闭！

------------------------------------


Log Entry : 19:35:45 2018年1月5日,星期五 

低压舱执行通道1关闭成功！

------------------------------------


Log Entry : 19:35:46 2018年1月5日,星期五 

低压舱执行通道2关闭！

------------------------------------


Log Entry : 19:35:48 2018年1月5日,星期五 

低压舱执行通道2关闭成功！

------------------------------------


Log Entry : 19:35:56 2018年1月5日,星期五 

校时指令执行成功！

------------------------------------


Log Entry : 09:45:51 2018年1月8日,星期一 

执行高压舱通道1打开！

------------------------------------


Log Entry : 09:45:53 2018年1月8日,星期一 

执行高压舱通道1打开成功！

------------------------------------


Log Entry : 09:45:54 2018年1月8日,星期一 

执行高压舱通道2打开！

------------------------------------


Log Entry : 09:45:56 2018年1月8日,星期一 

执行高压舱通道2打开成功！

------------------------------------


Log Entry : 09:45:57 2018年1月8日,星期一 

低压舱执行通道1打开！

------------------------------------


Log Entry : 09:45:59 2018年1月8日,星期一 

低压舱执行通道1打开成功！

------------------------------------


Log Entry : 09:46:00 2018年1月8日,星期一 

低压舱执行通道2打开！

------------------------------------


Log Entry : 09:46:01 2018年1月8日,星期一 

低压舱执行通道2打开成功！

------------------------------------


Log Entry : 11:24:23 2018年1月8日,星期一 

A舱通道1电压电流上下限设置成功！

------------------------------------


Log Entry : 11:24:28 2018年1月8日,星期一 

B舱通道2电压电流上下限设置成功！

------------------------------------


Log Entry : 11:24:32 2018年1月8日,星期一 

校时指令执行成功！

------------------------------------


Log Entry : 12:41:27 2018年1月8日,星期一 

校时指令执行成功！

------------------------------------


Log Entry : 12:41:32 2018年1月8日,星期一 

执行高压舱通道1关闭！

------------------------------------


Log Entry : 12:41:34 2018年1月8日,星期一 

执行高压舱通道1关闭成功！

------------------------------------


Log Entry : 12:41:35 2018年1月8日,星期一 

执行高压舱通道2关闭！

------------------------------------


Log Entry : 12:41:36 2018年1月8日,星期一 

执行高压舱通道2关闭成功！

------------------------------------


Log Entry : 12:41:37 2018年1月8日,星期一 

低压舱执行通道1关闭！

------------------------------------


Log Entry : 12:41:38 2018年1月8日,星期一 

低压舱执行通道1关闭成功！

------------------------------------


Log Entry : 12:41:39 2018年1月8日,星期一 

低压舱执行通道2关闭！

------------------------------------


Log Entry : 12:41:41 2018年1月8日,星期一 

低压舱执行通道2关闭成功！

------------------------------------


Log Entry : 14:45:09 2018年1月8日,星期一 

执行高压舱通道1打开！

------------------------------------


Log Entry : 14:45:11 2018年1月8日,星期一 

执行高压舱通道1打开成功！

------------------------------------


Log Entry : 14:45:11 2018年1月8日,星期一 

执行高压舱通道2打开！

------------------------------------


Log Entry : 14:45:13 2018年1月8日,星期一 

执行高压舱通道2打开成功！

------------------------------------


Log Entry : 14:45:14 2018年1月8日,星期一 

低压舱执行通道1打开！

------------------------------------


Log Entry : 14:45:16 2018年1月8日,星期一 

低压舱执行通道1打开成功！

------------------------------------


Log Entry : 14:45:17 2018年1月8日,星期一 

低压舱执行通道2打开！

------------------------------------


Log Entry : 14:45:19 2018年1月8日,星期一 

低压舱执行通道2打开成功！

------------------------------------


Log Entry : 14:46:40 2018年1月8日,星期一 

校时指令执行成功！

------------------------------------


Log Entry : 16:37:43 2018年1月8日,星期一 

校时指令执行成功！

------------------------------------


Log Entry : 16:37:55 2018年1月8日,星期一 

执行高压舱通道1关闭！

------------------------------------


Log Entry : 16:37:57 2018年1月8日,星期一 

执行高压舱通道1关闭成功！

------------------------------------


Log Entry : 16:37:58 2018年1月8日,星期一 

执行高压舱通道2关闭！

------------------------------------


Log Entry : 16:37:59 2018年1月8日,星期一 

执行高压舱通道2关闭成功！

------------------------------------


Log Entry : 16:38:00 2018年1月8日,星期一 

低压舱执行通道1关闭！

------------------------------------


Log Entry : 16:38:02 2018年1月8日,星期一 

低压舱执行通道1关闭成功！

------------------------------------


Log Entry : 16:38:03 2018年1月8日,星期一 

低压舱执行通道2关闭！

------------------------------------


Log Entry : 16:38:05 2018年1月8日,星期一 

低压舱执行通道2关闭成功！

------------------------------------


Log Entry : 10:39:06 2018年1月9日,星期二 

校时指令执行成功！

------------------------------------


Log Entry : 10:39:09 2018年1月9日,星期二 

B舱通道2电压电流上下限设置成功！

------------------------------------


Log Entry : 10:39:11 2018年1月9日,星期二 

B舱通道1电压电流上下限设置成功！

------------------------------------


Log Entry : 10:39:14 2018年1月9日,星期二 

A舱通道2电压电流上下限设置成功！

------------------------------------


Log Entry : 10:39:16 2018年1月9日,星期二 

A舱通道1电压电流上下限设置成功！

------------------------------------


Log Entry : 10:39:20 2018年1月9日,星期二 

校时指令执行成功！

------------------------------------


Log Entry : 10:39:22 2018年1月9日,星期二 

执行高压舱通道1打开！

------------------------------------


Log Entry : 10:39:26 2018年1月9日,星期二 

执行高压舱通道1打开成功！

------------------------------------


Log Entry : 10:39:27 2018年1月9日,星期二 

执行高压舱通道2打开！

------------------------------------


Log Entry : 10:39:28 2018年1月9日,星期二 

执行高压舱通道2打开成功！

------------------------------------


Log Entry : 10:39:29 2018年1月9日,星期二 

低压舱执行通道1打开！

------------------------------------


Log Entry : 10:39:31 2018年1月9日,星期二 

低压舱执行通道1打开成功！

------------------------------------


Log Entry : 10:39:32 2018年1月9日,星期二 

低压舱执行通道2打开！

------------------------------------


Log Entry : 10:39:33 2018年1月9日,星期二 

低压舱执行通道2打开成功！

------------------------------------


Log Entry : 12:17:50 2018年1月9日,星期二 

执行高压舱通道1关闭！

------------------------------------


Log Entry : 12:17:52 2018年1月9日,星期二 

执行高压舱通道1关闭成功！

------------------------------------


Log Entry : 12:17:53 2018年1月9日,星期二 

执行高压舱通道2关闭！

------------------------------------


Log Entry : 12:17:55 2018年1月9日,星期二 

执行高压舱通道2关闭成功！

------------------------------------


Log Entry : 12:17:56 2018年1月9日,星期二 

低压舱执行通道1关闭！

------------------------------------


Log Entry : 12:17:58 2018年1月9日,星期二 

低压舱执行通道1关闭成功！

------------------------------------


Log Entry : 12:17:59 2018年1月9日,星期二 

低压舱执行通道2关闭！

------------------------------------


Log Entry : 12:18:01 2018年1月9日,星期二 

低压舱执行通道2关闭成功！

------------------------------------


Log Entry : 12:18:05 2018年1月9日,星期二 

校时指令执行成功！

------------------------------------


Log Entry : 13:12:22 2018年1月9日,星期二 

低压舱执行通道1打开！

------------------------------------


Log Entry : 13:12:24 2018年1月9日,星期二 

低压舱执行通道1打开成功！

------------------------------------


Log Entry : 13:12:25 2018年1月9日,星期二 

低压舱执行通道2打开！

------------------------------------


Log Entry : 13:12:27 2018年1月9日,星期二 

低压舱执行通道2打开成功！

------------------------------------


Log Entry : 13:12:31 2018年1月9日,星期二 

校时指令执行成功！

------------------------------------


Log Entry : 16:26:40 2018年1月9日,星期二 

低压舱执行通道1关闭！

------------------------------------


Log Entry : 16:26:42 2018年1月9日,星期二 

低压舱执行通道1关闭成功！

------------------------------------


Log Entry : 16:26:43 2018年1月9日,星期二 

低压舱执行通道2关闭！

------------------------------------


Log Entry : 16:26:44 2018年1月9日,星期二 

低压舱执行通道2关闭成功！

------------------------------------


Log Entry : 16:26:49 2018年1月9日,星期二 

校时指令执行成功！

------------------------------------


Log Entry : 09:41:20 2018年1月10日,星期三 

校时指令执行成功！

------------------------------------


Log Entry : 11:25:28 2018年1月10日,星期三 

校时指令执行成功！

------------------------------------


Log Entry : 13:58:33 2018年1月22日,星期一 

A舱通道1电压电流上下限设置成功！

------------------------------------


Log Entry : 13:58:35 2018年1月22日,星期一 

A舱温度上下限设置成功！

------------------------------------


Log Entry : 13:58:37 2018年1月22日,星期一 

B舱通道1电压电流上下限设置成功！

------------------------------------


Log Entry : 13:58:40 2018年1月22日,星期一 

B舱通道2电压电流上下限设置成功！

------------------------------------


Log Entry : 13:58:42 2018年1月22日,星期一 

A舱通道2电压电流上下限设置成功！

------------------------------------


Log Entry : 13:58:46 2018年1月22日,星期一 

校时指令执行成功！

------------------------------------


Log Entry : 13:58:52 2018年1月22日,星期一 

执行高压舱通道1打开！

------------------------------------


Log Entry : 13:58:54 2018年1月22日,星期一 

执行高压舱通道1打开成功！

------------------------------------


Log Entry : 13:58:58 2018年1月22日,星期一 

执行高压舱通道2打开！

------------------------------------


Log Entry : 13:59:00 2018年1月22日,星期一 

执行高压舱通道2打开成功！

------------------------------------


Log Entry : 13:59:03 2018年1月22日,星期一 

低压舱执行通道1打开！

------------------------------------


Log Entry : 13:59:05 2018年1月22日,星期一 

低压舱执行通道1打开成功！

------------------------------------


Log Entry : 13:59:07 2018年1月22日,星期一 

低压舱执行通道2打开！

------------------------------------


Log Entry : 13:59:09 2018年1月22日,星期一 

低压舱执行通道2打开成功！

------------------------------------


Log Entry : 16:50:32 2018年1月22日,星期一 

执行高压舱通道1关闭！

------------------------------------


Log Entry : 16:50:34 2018年1月22日,星期一 

执行高压舱通道1关闭成功！

------------------------------------


Log Entry : 16:50:36 2018年1月22日,星期一 

执行高压舱通道2关闭！

------------------------------------


Log Entry : 16:50:38 2018年1月22日,星期一 

执行高压舱通道2关闭成功！

------------------------------------


Log Entry : 16:50:38 2018年1月22日,星期一 

低压舱执行通道1关闭！

------------------------------------


Log Entry : 16:50:40 2018年1月22日,星期一 

低压舱执行通道1关闭成功！

------------------------------------


Log Entry : 16:50:41 2018年1月22日,星期一 

低压舱执行通道2关闭！

------------------------------------


Log Entry : 16:50:43 2018年1月22日,星期一 

低压舱执行通道2关闭成功！

------------------------------------


Log Entry : 16:50:46 2018年1月22日,星期一 

校时指令执行成功！

------------------------------------


Log Entry : 09:34:30 2018年1月23日,星期二 

B舱通道2电压电流上下限设置成功！

------------------------------------


Log Entry : 09:34:34 2018年1月23日,星期二 

B舱通道1电压电流上下限设置成功！

------------------------------------


Log Entry : 09:34:40 2018年1月23日,星期二 

A舱通道2电压电流上下限设置成功！

------------------------------------


Log Entry : 09:34:43 2018年1月23日,星期二 

A舱通道1电压电流上下限设置成功！

------------------------------------


Log Entry : 09:34:47 2018年1月23日,星期二 

A舱温度上下限设置成功！

------------------------------------


Log Entry : 09:34:49 2018年1月23日,星期二 

B舱温度上下限设置成功！

------------------------------------


Log Entry : 09:34:57 2018年1月23日,星期二 

校时指令执行成功！

------------------------------------


Log Entry : 12:32:35 2018年1月23日,星期二 

校时指令执行成功！

------------------------------------


Log Entry : 14:00:46 2018年1月23日,星期二 

A舱温度上下限设置成功！

------------------------------------


Log Entry : 14:00:50 2018年1月23日,星期二 

B舱温度上下限设置成功！

------------------------------------


Log Entry : 16:38:39 2018年1月23日,星期二 

校时指令执行成功！

------------------------------------


Log Entry : 09:05:03 2018年1月24日,星期三 

执行高压舱通道1打开！

------------------------------------


Log Entry : 09:05:06 2018年1月24日,星期三 

执行高压舱通道1打开成功！

------------------------------------


Log Entry : 09:05:08 2018年1月24日,星期三 

执行高压舱通道2打开！

------------------------------------


Log Entry : 09:05:10 2018年1月24日,星期三 

执行高压舱通道2打开成功！

------------------------------------


Log Entry : 09:05:11 2018年1月24日,星期三 

低压舱执行通道1打开！

------------------------------------


Log Entry : 09:05:13 2018年1月24日,星期三 

低压舱执行通道1打开成功！

------------------------------------


Log Entry : 09:05:14 2018年1月24日,星期三 

低压舱执行通道2打开！

------------------------------------


Log Entry : 09:05:16 2018年1月24日,星期三 

低压舱执行通道2打开成功！

------------------------------------


Log Entry : 10:12:28 2018年1月24日,星期三 

校时指令执行成功！

------------------------------------


Log Entry : 13:12:30 2018年1月24日,星期三 

校时指令执行成功！

------------------------------------


Log Entry : 13:12:36 2018年1月24日,星期三 

执行高压舱通道1关闭！

------------------------------------


Log Entry : 13:12:37 2018年1月24日,星期三 

执行高压舱通道1关闭成功！

------------------------------------


Log Entry : 13:12:38 2018年1月24日,星期三 

执行高压舱通道2关闭！

------------------------------------


Log Entry : 13:12:40 2018年1月24日,星期三 

执行高压舱通道2关闭成功！

------------------------------------


Log Entry : 13:12:41 2018年1月24日,星期三 

低压舱执行通道1关闭！

------------------------------------


Log Entry : 13:12:43 2018年1月24日,星期三 

低压舱执行通道1关闭成功！

------------------------------------


Log Entry : 13:12:44 2018年1月24日,星期三 

低压舱执行通道2关闭！

------------------------------------


Log Entry : 13:12:47 2018年1月24日,星期三 

低压舱执行通道2关闭成功！

------------------------------------


Log Entry : 09:11:55 2018年1月25日,星期四 

校时指令执行成功！

------------------------------------


Log Entry : 09:28:53 2018年1月25日,星期四 

校时指令执行成功！

------------------------------------


Log Entry : 10:35:56 2018年1月26日,星期五 

校时指令执行成功！

------------------------------------


Log Entry : 11:10:13 2018年1月26日,星期五 

校时指令执行成功！

------------------------------------


Log Entry : 14:09:12 2018年2月8日,星期四 

低压舱执行通道1打开！

------------------------------------


Log Entry : 14:09:14 2018年2月8日,星期四 

低压舱执行通道1打开成功！

------------------------------------


Log Entry : 14:09:18 2018年2月8日,星期四 

低压舱执行通道2打开！

------------------------------------


Log Entry : 14:09:20 2018年2月8日,星期四 

低压舱执行通道2打开成功！

------------------------------------


Log Entry : 14:10:33 2018年2月8日,星期四 

执行通道1打开！

------------------------------------


Log Entry : 14:10:39 2018年2月8日,星期四 

执行通道1打开失败！

------------------------------------


Log Entry : 14:11:11 2018年2月8日,星期四 

执行通道1打开！

------------------------------------


Log Entry : 14:11:13 2018年2月8日,星期四 

执行通道1打开失败！

------------------------------------


Log Entry : 14:14:51 2018年2月8日,星期四 

低压舱执行通道2打开！

------------------------------------


Log Entry : 14:14:55 2018年2月8日,星期四 

低压舱执行通道2打开！

------------------------------------


Log Entry : 14:15:57 2018年2月8日,星期四 

低压舱执行通道1打开！

------------------------------------


Log Entry : 14:15:59 2018年2月8日,星期四 

低压舱执行通道1打开成功！

------------------------------------


Log Entry : 14:16:02 2018年2月8日,星期四 

低压舱执行通道1关闭！

------------------------------------


Log Entry : 14:16:04 2018年2月8日,星期四 

低压舱执行通道1关闭成功！

------------------------------------


Log Entry : 14:16:05 2018年2月8日,星期四 

低压舱执行通道2打开！

------------------------------------


Log Entry : 14:16:07 2018年2月8日,星期四 

低压舱执行通道2打开成功！

------------------------------------


Log Entry : 14:16:08 2018年2月8日,星期四 

低压舱执行通道2关闭！

------------------------------------


Log Entry : 14:16:10 2018年2月8日,星期四 

低压舱执行通道2关闭成功！

------------------------------------


Log Entry : 14:26:52 2018年2月8日,星期四 

低压舱执行通道2打开！

------------------------------------


Log Entry : 14:26:55 2018年2月8日,星期四 

低压舱执行通道2打开成功！

------------------------------------


Log Entry : 14:33:16 2018年2月8日,星期四 

执行通道1打开！

------------------------------------


Log Entry : 14:33:19 2018年2月8日,星期四 

执行通道1打开失败！

------------------------------------


Log Entry : 14:33:24 2018年2月8日,星期四 

执行通道1打开！

------------------------------------


Log Entry : 14:33:26 2018年2月8日,星期四 

执行通道1打开失败！

------------------------------------


Log Entry : 14:34:35 2018年2月8日,星期四 

执行通道1打开！

------------------------------------


Log Entry : 14:34:38 2018年2月8日,星期四 

执行通道1打开失败！

------------------------------------


Log Entry : 14:34:58 2018年2月8日,星期四 

执行通道1打开！

------------------------------------


Log Entry : 14:35:00 2018年2月8日,星期四 

执行通道1打开失败！

------------------------------------


Log Entry : 14:53:55 2018年2月8日,星期四 

执行通道1打开！

------------------------------------


Log Entry : 14:53:58 2018年2月8日,星期四 

执行通道1打开成功！

------------------------------------


Log Entry : 14:56:18 2018年2月8日,星期四 

低压舱执行通道2打开！

------------------------------------


Log Entry : 14:56:20 2018年2月8日,星期四 

低压舱执行通道2打开成功！

------------------------------------


Log Entry : 15:00:32 2018年2月8日,星期四 

设置时间间隔执行成功！

------------------------------------


Log Entry : 15:02:05 2018年2月8日,星期四 

摄像头打开成功！

------------------------------------


Log Entry : 16:01:03 2018年2月8日,星期四 

低压舱执行通道1打开！

------------------------------------


Log Entry : 16:01:05 2018年2月8日,星期四 

低压舱执行通道1打开成功！

------------------------------------


Log Entry : 16:01:09 2018年2月8日,星期四 

执行高压舱通道1打开！

------------------------------------


Log Entry : 16:01:11 2018年2月8日,星期四 

执行高压舱通道1打开成功！

------------------------------------


Log Entry : 16:01:13 2018年2月8日,星期四 

执行高压舱通道2打开！

------------------------------------


Log Entry : 16:01:15 2018年2月8日,星期四 

执行高压舱通道2打开成功！

------------------------------------


Log Entry : 16:52:31 2018年2月8日,星期四 

执行高压舱通道1关闭！

------------------------------------


Log Entry : 16:52:33 2018年2月8日,星期四 

执行高压舱通道1关闭成功！

------------------------------------


Log Entry : 16:52:33 2018年2月8日,星期四 

执行高压舱通道2关闭！

------------------------------------


Log Entry : 16:52:35 2018年2月8日,星期四 

执行高压舱通道2关闭成功！

------------------------------------


Log Entry : 16:52:43 2018年2月8日,星期四 

摄像头关闭成功！

------------------------------------


Log Entry : 16:52:51 2018年2月8日,星期四 

低压舱执行通道1关闭！

------------------------------------


Log Entry : 16:52:53 2018年2月8日,星期四 

低压舱执行通道1关闭成功！

------------------------------------


Log Entry : 16:52:56 2018年2月8日,星期四 

低压舱执行通道2关闭！

------------------------------------


Log Entry : 16:52:58 2018年2月8日,星期四 

低压舱执行通道2关闭成功！

------------------------------------


Log Entry : 16:53:05 2018年2月8日,星期四 

执行通道1关闭！

------------------------------------


Log Entry : 16:53:28 2018年2月8日,星期四 

执行通道1关闭失败！

------------------------------------


Log Entry : 16:53:34 2018年2月8日,星期四 

低压舱执行通道2打开！

------------------------------------


Log Entry : 16:53:36 2018年2月8日,星期四 

低压舱执行通道2打开成功！

------------------------------------


Log Entry : 16:54:17 2018年2月8日,星期四 

执行通道1关闭！

------------------------------------


Log Entry : 16:54:20 2018年2月8日,星期四 

执行通道1关闭成功！

------------------------------------


Log Entry : 16:54:23 2018年2月8日,星期四 

执行通道2关闭！

------------------------------------


Log Entry : 16:54:26 2018年2月8日,星期四 

执行通道2关闭成功！

------------------------------------


Log Entry : 16:54:27 2018年2月8日,星期四 

执行通道3关闭！

------------------------------------


Log Entry : 16:54:29 2018年2月8日,星期四 

执行通道3关闭成功！

------------------------------------


Log Entry : 16:54:29 2018年2月8日,星期四 

执行通道4关闭！

------------------------------------


Log Entry : 16:54:32 2018年2月8日,星期四 

执行通道4关闭成功！

------------------------------------


Log Entry : 16:54:32 2018年2月8日,星期四 

执行通道5关闭！

------------------------------------


Log Entry : 16:54:35 2018年2月8日,星期四 

执行通道5关闭成功！

------------------------------------


Log Entry : 16:54:40 2018年2月8日,星期四 

低压舱执行通道2关闭！

------------------------------------


Log Entry : 16:54:42 2018年2月8日,星期四 

低压舱执行通道2关闭成功！

------------------------------------


Log Entry : 09:40:33 2018年3月5日,星期一 

低压舱执行通道1打开！

------------------------------------


Log Entry : 09:40:39 2018年3月5日,星期一 

低压舱执行通道1打开失败！

------------------------------------


Log Entry : 09:40:41 2018年3月5日,星期一 

低压舱执行通道1打开！

------------------------------------


Log Entry : 09:40:43 2018年3月5日,星期一 

低压舱执行通道1打开成功！

------------------------------------


Log Entry : 09:40:44 2018年3月5日,星期一 

低压舱执行通道2打开！

------------------------------------


Log Entry : 09:40:46 2018年3月5日,星期一 

低压舱执行通道2打开成功！

------------------------------------


Log Entry : 09:41:32 2018年3月5日,星期一 

执行通道1打开！

------------------------------------


Log Entry : 09:41:35 2018年3月5日,星期一 

执行通道1打开成功！

------------------------------------


Log Entry : 09:42:03 2018年3月5日,星期一 

执行校时指令成功！

------------------------------------


Log Entry : 09:42:18 2018年3月5日,星期一 

执行校准溶解氧时钟指令！

------------------------------------


Log Entry : 09:42:20 2018年3月5日,星期一 

执行校准溶解氧时钟指令成功！

------------------------------------


Log Entry : 09:42:20 2018年3月5日,星期一 

执行溶解氧多次测量指令！

------------------------------------


Log Entry : 09:42:22 2018年3月5日,星期一 

执行溶解氧多次测量指令成功！

------------------------------------


Log Entry : 09:44:28 2018年3月5日,星期一 

摄像头打开成功！

------------------------------------


Log Entry : 09:48:10 2018年3月5日,星期一 

摄像头关闭成功！

------------------------------------


Log Entry : 09:54:00 2018年3月5日,星期一 

摄像头打开成功！

------------------------------------


Log Entry : 16:00:02 2018年3月5日,星期一 

执行通道1关闭！

------------------------------------


Log Entry : 16:00:05 2018年3月5日,星期一 

执行通道1关闭成功！

------------------------------------


Log Entry : 16:00:09 2018年3月5日,星期一 

执行通道2关闭！

------------------------------------


Log Entry : 16:00:11 2018年3月5日,星期一 

执行通道2关闭成功！

------------------------------------


Log Entry : 16:00:12 2018年3月5日,星期一 

执行通道3关闭！

------------------------------------


Log Entry : 16:00:14 2018年3月5日,星期一 

执行通道3关闭成功！

------------------------------------


Log Entry : 16:00:15 2018年3月5日,星期一 

执行通道4关闭！

------------------------------------


Log Entry : 16:00:22 2018年3月5日,星期一 

执行通道4关闭成功！

------------------------------------


Log Entry : 16:00:23 2018年3月5日,星期一 

执行通道5关闭！

------------------------------------


Log Entry : 16:00:25 2018年3月5日,星期一 

执行通道5关闭成功！

------------------------------------


Log Entry : 16:00:36 2018年3月5日,星期一 

低压舱执行通道1关闭！

------------------------------------


Log Entry : 16:00:38 2018年3月5日,星期一 

低压舱执行通道1关闭成功！

------------------------------------


Log Entry : 16:00:44 2018年3月5日,星期一 

摄像头关闭成功！

------------------------------------


Log Entry : 16:00:48 2018年3月5日,星期一 

低压舱执行通道2关闭！

------------------------------------


Log Entry : 16:00:49 2018年3月5日,星期一 

低压舱执行通道2关闭成功！

------------------------------------


Log Entry : 09:28:21 2018年3月6日,星期二 

低压舱执行通道1打开！

------------------------------------


Log Entry : 09:28:24 2018年3月6日,星期二 

低压舱执行通道1打开成功！

------------------------------------


Log Entry : 09:28:28 2018年3月6日,星期二 

低压舱执行通道2打开！

------------------------------------


Log Entry : 09:28:36 2018年3月6日,星期二 

低压舱执行通道2打开成功！

------------------------------------


Log Entry : 09:36:19 2018年3月6日,星期二 

执行通道1打开！

------------------------------------


Log Entry : 09:36:23 2018年3月6日,星期二 

执行通道1打开成功！

------------------------------------


Log Entry : 09:37:13 2018年3月6日,星期二 

摄像头打开成功！

------------------------------------


Log Entry : 09:37:55 2018年3月6日,星期二 

执行溶解氧多次测量指令！

------------------------------------


Log Entry : 09:37:57 2018年3月6日,星期二 

执行溶解氧多次测量指令成功！

------------------------------------


Log Entry : 11:40:58 2018年3月12日 

执行校准溶解氧时钟指令！

------------------------------------


Log Entry : 11:41:32 2018年3月12日 

执行校准溶解氧时钟指令失败！

------------------------------------


Log Entry : 13:37:37 2018年3月12日 

执行设置溶解氧时间间隔：0005

------------------------------------


Log Entry : 13:38:00 2018年3月12日 

执行设置溶解氧时间间隔失败！

------------------------------------


Log Entry : 13:38:04 2018年3月12日 

执行设置溶解氧时间间隔：0010

------------------------------------


Log Entry : 13:38:27 2018年3月12日 

执行设置溶解氧时间间隔失败！

------------------------------------


Log Entry : 13:26:14 2018年3月16日 

执行设置溶解氧报警阈值，电流上限:04.000电流下限:00.001电压上限:14.000电压下限:11.000

------------------------------------


Log Entry : 13:27:22 2018年3月16日 

执行设置溶解氧报警阈值失败！

------------------------------------


Log Entry : 13:51:13 2018年3月16日 

执行设置溶解氧时间间隔：0015

------------------------------------


Log Entry : 13:56:09 2018年3月16日 

执行设置AD板时间间隔：0020

------------------------------------


Log Entry : 10:14:08 2018年3月19日 

执行设置AD板时间间隔：0020

------------------------------------


Log Entry : 10:14:33 2018年3月19日 

执行设置AD板时间间隔失败！

------------------------------------


Log Entry : 14:51:11 2018年3月22日 

A舱通道2电压电流上下限设置失败！

------------------------------------


Log Entry : 14:53:04 2018年3月22日 

A舱通道2电压电流上下限设置失败！

------------------------------------


Log Entry : 14:54:10 2018年3月22日 

A舱通道2电压电流上下限设置失败！

------------------------------------


Log Entry : 14:56:08 2018年3月22日 

A舱通道2电压电流上下限设置失败！

------------------------------------


Log Entry : 15:05:21 2018年3月22日 

主接驳盒芯片擦除指令执行失败！

------------------------------------


Log Entry : 15:05:39 2018年3月22日 

B舱温度上下限设置失败！

------------------------------------


Log Entry : 15:08:25 2018年3月22日 

A舱温度上下限设置失败！

------------------------------------


Log Entry : 14:08:21 2018年4月9日 

执行通道1打开！

------------------------------------


Log Entry : 14:08:44 2018年4月9日 

执行通道1打开失败！

------------------------------------


Log Entry : 14:10:10 2018年4月9日 

执行通道1打开！

------------------------------------


Log Entry : 14:10:21 2018年4月9日 

执行通道1打开失败！

------------------------------------


Log Entry : 14:14:03 2018年4月9日 

执行通道1打开！

------------------------------------


Log Entry : 14:14:12 2018年4月9日 

执行通道1打开失败！

------------------------------------


Log Entry : 14:14:16 2018年4月9日 

执行通道1打开！

------------------------------------


Log Entry : 14:14:20 2018年4月9日 

执行通道1打开成功！

------------------------------------


Log Entry : 14:16:13 2018年4月9日 

执行通道1打开！

------------------------------------


Log Entry : 14:16:17 2018年4月9日 

执行通道1打开成功！

------------------------------------


Log Entry : 14:30:04 2018年4月9日 

执行校时指令失败！

------------------------------------


Log Entry : 14:30:28 2018年4月9日 

执行校时指令失败！

------------------------------------


Log Entry : 14:30:30 2018年4月9日 

执行设置溶解氧报警阈值，电流上限:05.000电流下限:00.002电压上限:15.000电压下限:10.000

------------------------------------


Log Entry : 14:30:31 2018年4月9日 

执行设置溶解氧报警阈值失败！

------------------------------------


Log Entry : 14:32:58 2018年4月9日 

执行校时指令失败！

------------------------------------


Log Entry : 14:32:59 2018年4月9日 

执行设置溶解氧时间间隔：0010

------------------------------------


Log Entry : 14:33:01 2018年4月9日 

执行设置溶解氧时间间隔失败！

------------------------------------


Log Entry : 14:33:01 2018年4月9日 

执行设置溶解氧报警阈值，电流上限:05.000电流下限:00.002电压上限:15.000电压下限:10.000

------------------------------------


Log Entry : 14:33:03 2018年4月9日 

执行设置溶解氧报警阈值失败！

------------------------------------


Log Entry : 14:33:04 2018年4月9日 

执行设置甲烷报警阈值，电流上限:01.000电流下限:00.000电压上限:26.000电压下限:23.000

------------------------------------


Log Entry : 14:33:06 2018年4月9日 

执行设置甲烷报警阈值失败！

------------------------------------


Log Entry : 14:33:35 2018年4月9日 

执行校时指令失败！

------------------------------------


Log Entry : 14:41:29 2018年4月9日 

执行校时指令失败！

------------------------------------


Log Entry : 10:32:34 2018年4月10日 

执行通道1打开！

------------------------------------


Log Entry : 10:32:40 2018年4月10日 

执行通道1打开成功！

------------------------------------


Log Entry : 10:34:41 2018年4月10日 

执行通道1打开！

------------------------------------


Log Entry : 10:34:44 2018年4月10日 

执行通道1打开成功！

------------------------------------


Log Entry : 10:34:47 2018年4月10日 

执行通道1关闭！

------------------------------------


Log Entry : 10:34:58 2018年4月10日 

执行通道1关闭失败！

------------------------------------


Log Entry : 10:37:18 2018年4月10日 

执行通道2打开！

------------------------------------


Log Entry : 10:37:22 2018年4月10日 

执行通道2打开成功！

------------------------------------


Log Entry : 10:38:43 2018年4月10日 

执行通道2打开！

------------------------------------


Log Entry : 10:38:46 2018年4月10日 

执行通道2打开成功！

------------------------------------


Log Entry : 10:38:49 2018年4月10日 

执行通道2关闭！

------------------------------------


Log Entry : 10:38:59 2018年4月10日 

执行通道2关闭失败！

------------------------------------


Log Entry : 10:40:43 2018年4月10日 

执行通道3打开！

------------------------------------


Log Entry : 10:40:47 2018年4月10日 

执行通道3打开成功！

------------------------------------


Log Entry : 10:42:23 2018年4月10日 

执行通道3打开！

------------------------------------


Log Entry : 10:42:26 2018年4月10日 

执行通道3打开成功！

------------------------------------


Log Entry : 10:42:33 2018年4月10日 

执行通道3关闭！

------------------------------------


Log Entry : 10:42:44 2018年4月10日 

执行通道3关闭失败！

------------------------------------


Log Entry : 10:44:00 2018年4月10日 

执行通道4打开！

------------------------------------


Log Entry : 10:44:05 2018年4月10日 

执行通道4打开成功！

------------------------------------


Log Entry : 10:45:28 2018年4月10日 

执行通道4打开！

------------------------------------


Log Entry : 10:45:30 2018年4月10日 

执行通道4打开成功！

------------------------------------


Log Entry : 10:45:31 2018年4月10日 

执行通道4关闭！

------------------------------------


Log Entry : 10:45:45 2018年4月10日 

执行通道4关闭失败！

------------------------------------


Log Entry : 10:47:15 2018年4月10日 

执行通道5打开！

------------------------------------


Log Entry : 10:47:19 2018年4月10日 

执行通道5打开成功！

------------------------------------


Log Entry : 10:48:34 2018年4月10日 

执行通道5打开！

------------------------------------


Log Entry : 10:48:37 2018年4月10日 

执行通道5打开成功！

------------------------------------


Log Entry : 10:48:40 2018年4月10日 

执行通道5关闭！

------------------------------------


Log Entry : 10:48:50 2018年4月10日 

执行通道5关闭失败！

------------------------------------


Log Entry : 10:49:21 2018年4月10日 

执行校时指令失败！

------------------------------------


Log Entry : 10:49:22 2018年4月10日 

执行设置溶解氧时间间隔：0010

------------------------------------


Log Entry : 10:49:37 2018年4月10日 

执行设置溶解氧时间间隔失败！

------------------------------------


Log Entry : 10:49:39 2018年4月10日 

执行设置AD板时间间隔：0010

------------------------------------


Log Entry : 10:49:48 2018年4月10日 

执行设置AD板时间间隔失败！

------------------------------------


Log Entry : 10:49:50 2018年4月10日 

执行设置溶解氧报警阈值，电流上限:05.000电流下限:00.002电压上限:15.000电压下限:10.000

------------------------------------


Log Entry : 10:50:00 2018年4月10日 

执行设置溶解氧报警阈值失败！

------------------------------------


Log Entry : 10:50:01 2018年4月10日 

执行设置甲烷报警阈值，电流上限:01.000电流下限:00.000电压上限:26.000电压下限:23.000

------------------------------------


Log Entry : 10:50:12 2018年4月10日 

执行设置甲烷报警阈值失败！

------------------------------------


Log Entry : 10:50:13 2018年4月10日 

执行设置叶绿素报警阈值，电流上限:01.000电流下限:00.000电压上限:13.000电压下限:11.000

------------------------------------


Log Entry : 10:51:29 2018年4月10日 

执行设置叶绿素报警阈值失败！

------------------------------------


Log Entry : 10:51:32 2018年4月10日 

执行设置浊度报警阈值，电流上限:01.000电流下限:00.000电压上限:13.000电压下限:11.000

------------------------------------


Log Entry : 10:51:41 2018年4月10日 

执行设置浊度报警阈值失败！

------------------------------------


Log Entry : 10:51:42 2018年4月10日 

执行设置CDOM报警阈值，电流上限:01.000电流下限:00.000电压上限:13.000电压下限:11.000

------------------------------------


Log Entry : 10:51:52 2018年4月10日 

执行设置CDOM报警阈值失败！

------------------------------------


Log Entry : 10:51:53 2018年4月10日 

执行设置温度报警阈值，温度上限:75.000温度下限:00.000

------------------------------------


Log Entry : 10:52:04 2018年4月10日 

执行设置温度报警阈值失败！

------------------------------------


Log Entry : 10:52:08 2018年4月10日 

执行溶解氧单次测量指令！

------------------------------------


Log Entry : 10:52:18 2018年4月10日 

溶解氧单次测量执行失败！

------------------------------------


Log Entry : 10:52:19 2018年4月10日 

执行溶解氧多次测量指令！

------------------------------------


Log Entry : 10:52:28 2018年4月10日 

执行溶解氧多次测量指令失败！

------------------------------------


Log Entry : 10:52:29 2018年4月10日 

执行溶解氧存储芯片擦除指令！

------------------------------------


Log Entry : 10:52:39 2018年4月10日 

执行溶解氧存储芯片擦除指令失败！

------------------------------------


Log Entry : 10:52:40 2018年4月10日 

执行校准溶解氧时钟指令！

------------------------------------


Log Entry : 10:52:51 2018年4月10日 

执行校准溶解氧时钟指令失败！

------------------------------------


Log Entry : 13:21:27 2018年4月10日 

执行通道1打开！

------------------------------------


Log Entry : 13:21:37 2018年4月10日 

执行通道1打开失败！

------------------------------------


Log Entry : 13:21:38 2018年4月10日 

执行通道2打开！

------------------------------------


Log Entry : 13:21:48 2018年4月10日 

执行通道2打开失败！

------------------------------------


Log Entry : 13:22:04 2018年4月10日 

执行通道3打开！

------------------------------------


Log Entry : 13:22:14 2018年4月10日 

执行通道3打开失败！

------------------------------------


Log Entry : 13:22:15 2018年4月10日 

执行通道4打开！

------------------------------------


Log Entry : 13:22:24 2018年4月10日 

执行通道4打开失败！

------------------------------------


Log Entry : 13:22:25 2018年4月10日 

执行通道5打开！

------------------------------------


Log Entry : 13:22:35 2018年4月10日 

执行通道5打开失败！

------------------------------------


Log Entry : 13:22:44 2018年4月10日 

执行溶解氧单次测量指令！

------------------------------------


Log Entry : 13:22:55 2018年4月10日 

溶解氧单次测量执行失败！

------------------------------------


Log Entry : 13:22:56 2018年4月10日 

执行溶解氧多次测量指令！

------------------------------------


Log Entry : 13:23:07 2018年4月10日 

执行溶解氧多次测量指令失败！

------------------------------------


Log Entry : 13:24:19 2018年4月10日 

执行溶解氧多次测量指令！

------------------------------------


Log Entry : 13:24:29 2018年4月10日 

执行溶解氧多次测量指令失败！

------------------------------------


Log Entry : 13:24:39 2018年4月10日 

执行校准溶解氧时钟指令！

------------------------------------


Log Entry : 13:24:49 2018年4月10日 

执行校准溶解氧时钟指令失败！

------------------------------------


Log Entry : 13:24:51 2018年4月10日 

执行设置溶解氧时间间隔：0005

------------------------------------


Log Entry : 13:25:01 2018年4月10日 

执行设置溶解氧时间间隔失败！

------------------------------------


Log Entry : 13:26:36 2018年4月10日 

执行通道1打开！

------------------------------------


Log Entry : 13:26:41 2018年4月10日 

执行通道1打开成功！

------------------------------------


Log Entry : 13:28:22 2018年4月10日 

执行通道1打开！

------------------------------------


Log Entry : 13:28:28 2018年4月10日 

执行通道1打开成功！

------------------------------------


Log Entry : 13:45:45 2018年4月11日 

执行高压舱通道1打开！

------------------------------------


Log Entry : 13:45:59 2018年4月11日 

执行高压舱通道1打开失败！

------------------------------------


Log Entry : 15:07:03 2018年4月11日 

执行溶解氧单次测量指令！

------------------------------------


Log Entry : 15:07:16 2018年4月11日 

溶解氧单次测量执行失败！

------------------------------------


Log Entry : 15:11:38 2018年4月11日 

执行溶解氧单次测量指令！

------------------------------------


Log Entry : 15:11:48 2018年4月11日 

溶解氧单次测量执行失败！

------------------------------------


Log Entry : 15:11:49 2018年4月11日 

执行溶解氧多次测量指令！

------------------------------------


Log Entry : 15:11:59 2018年4月11日 

执行溶解氧多次测量指令失败！

------------------------------------


Log Entry : 15:12:01 2018年4月11日 

执行设置溶解氧时间间隔：0005

------------------------------------


Log Entry : 15:12:04 2018年4月11日 

执行设置溶解氧时间间隔失败！

------------------------------------


Log Entry : 15:12:05 2018年4月11日 

执行设置溶解氧时间间隔：0005

------------------------------------


Log Entry : 15:12:07 2018年4月11日 

执行设置溶解氧时间间隔失败！

------------------------------------


Log Entry : 15:12:09 2018年4月11日 

执行设置溶解氧时间间隔：0005

------------------------------------


Log Entry : 15:12:11 2018年4月11日 

执行设置溶解氧时间间隔失败！

------------------------------------


Log Entry : 15:12:17 2018年4月11日 

执行校准溶解氧时钟指令！

------------------------------------


Log Entry : 15:12:31 2018年4月11日 

执行校准溶解氧时钟指令失败！

------------------------------------


Log Entry : 15:12:34 2018年4月11日 

执行溶解氧存储芯片擦除指令！

------------------------------------


Log Entry : 15:12:44 2018年4月11日 

执行溶解氧存储芯片擦除指令失败！

------------------------------------


Log Entry : 15:13:40 2018年4月11日 

执行溶解氧单次测量指令！

------------------------------------


Log Entry : 15:13:49 2018年4月11日 

溶解氧单次测量执行失败！

------------------------------------


Log Entry : 15:13:50 2018年4月11日 

执行溶解氧多次测量指令！

------------------------------------


Log Entry : 15:14:01 2018年4月11日 

执行溶解氧多次测量指令失败！

------------------------------------


Log Entry : 15:14:03 2018年4月11日 

执行设置溶解氧时间间隔：0005

------------------------------------


Log Entry : 15:14:05 2018年4月11日 

执行设置溶解氧时间间隔失败！

------------------------------------


Log Entry : 15:14:06 2018年4月11日 

执行校准溶解氧时钟指令！

------------------------------------


Log Entry : 15:14:24 2018年4月11日 

执行校准溶解氧时钟指令失败！

------------------------------------


Log Entry : 15:14:26 2018年4月11日 

执行溶解氧存储芯片擦除指令！

------------------------------------


Log Entry : 15:14:35 2018年4月11日 

执行溶解氧存储芯片擦除指令失败！

------------------------------------


Log Entry : 15:15:23 2018年4月11日 

执行溶解氧单次测量指令！

------------------------------------


Log Entry : 15:15:37 2018年4月11日 

溶解氧单次测量执行失败！

------------------------------------


Log Entry : 15:15:38 2018年4月11日 

执行溶解氧存储芯片擦除指令！

------------------------------------


Log Entry : 15:15:48 2018年4月11日 

执行溶解氧存储芯片擦除指令失败！

------------------------------------


Log Entry : 15:15:58 2018年4月11日 

执行校准溶解氧时钟指令！

------------------------------------


Log Entry : 15:16:19 2018年4月11日 

执行校准溶解氧时钟指令失败！

------------------------------------


Log Entry : 16:00:29 2018年4月11日 

执行溶解氧单次测量指令！

------------------------------------


Log Entry : 16:07:33 2018年4月11日 

执行溶解氧单次测量指令！

------------------------------------


Log Entry : 16:07:41 2018年4月11日 

溶解氧单次测量执行成功！

------------------------------------


Log Entry : 16:08:38 2018年4月11日 

执行溶解氧单次测量指令！

------------------------------------


Log Entry : 16:08:42 2018年4月11日 

溶解氧单次测量执行失败！

------------------------------------


Log Entry : 16:27:17 2018年4月17日 

执行CTD配置模式指令！

------------------------------------


Log Entry : 16:27:28 2018年4月17日 

CTD配置模式执行失败！

------------------------------------


Log Entry : 16:29:17 2018年4月17日 

执行CTD锚系模式指令！

------------------------------------


Log Entry : 16:29:33 2018年4月17日 

CTD锚系模式执行失败！

------------------------------------


Log Entry : 16:48:09 2018年4月17日 

执行CTD配置模式指令！

------------------------------------


Log Entry : 16:48:19 2018年4月17日 

CTD配置模式执行失败！

------------------------------------


Log Entry : 16:48:32 2018年4月17日 

执行CTD配置模式指令！

------------------------------------


Log Entry : 16:48:44 2018年4月17日 

CTD配置模式执行失败！

------------------------------------


Log Entry : 16:48:45 2018年4月17日 

执行CTD配置模式指令！

------------------------------------


Log Entry : 16:48:55 2018年4月17日 

CTD配置模式执行失败！

------------------------------------


Log Entry : 16:50:01 2018年4月17日 

执行CTD配置模式指令！

------------------------------------


Log Entry : 16:50:06 2018年4月17日 

CTD配置模式执行成功！

------------------------------------


Log Entry : 16:50:07 2018年4月17日 

执行CTD设置时间间隔:

------------------------------------


Log Entry : 16:50:17 2018年4月17日 

CTD设置时间间隔执行失败！

------------------------------------


Log Entry : 16:52:05 2018年4月17日 

执行CTD配置模式指令！

------------------------------------


Log Entry : 16:52:12 2018年4月17日 

CTD配置模式执行成功！

------------------------------------


Log Entry : 16:52:14 2018年4月17日 

执行CTD设置时间间隔:

------------------------------------


Log Entry : 16:52:27 2018年4月17日 

CTD设置时间间隔执行失败！

------------------------------------


Log Entry : 16:52:59 2018年4月17日 

执行CTD配置模式指令！

------------------------------------


Log Entry : 16:53:05 2018年4月17日 

CTD配置模式执行成功！

------------------------------------


Log Entry : 16:53:14 2018年4月17日 

执行CTD设置时间间隔:5

------------------------------------


Log Entry : 16:53:25 2018年4月17日 

CTD设置时间间隔执行失败！

------------------------------------


Log Entry : 17:00:28 2018年4月17日 

执行CTD设置时间间隔:5

------------------------------------


Log Entry : 17:00:31 2018年4月17日 

CTD设置时间间隔执行失败！

------------------------------------


Log Entry : 9:11:40 2018年4月18日 

执行溶解氧单次测量指令！

------------------------------------


Log Entry : 9:11:50 2018年4月18日 

溶解氧单次测量执行失败！

------------------------------------


Log Entry : 9:12:18 2018年4月18日 

执行CTD配置模式指令！

------------------------------------


Log Entry : 9:12:29 2018年4月18日 

CTD配置模式执行失败！

------------------------------------


Log Entry : 9:12:31 2018年4月18日 

执行CTD配置模式指令！

------------------------------------


Log Entry : 9:12:38 2018年4月18日 

CTD配置模式执行成功！

------------------------------------


Log Entry : 16:27:12 2018年4月26日,星期四 

执行高压舱通道1打开！

------------------------------------


Log Entry : 16:27:14 2018年4月26日,星期四 

执行高压舱通道1打开成功！

------------------------------------


Log Entry : 16:27:15 2018年4月26日,星期四 

执行高压舱通道2打开！

------------------------------------


Log Entry : 16:27:19 2018年4月26日,星期四 

执行高压舱通道2打开成功！

------------------------------------


Log Entry : 16:27:24 2018年4月26日,星期四 

校时指令执行成功！

------------------------------------


Log Entry : 16:27:29 2018年4月26日,星期四 

执行高压舱通道1关闭！

------------------------------------


Log Entry : 16:27:31 2018年4月26日,星期四 

执行高压舱通道1关闭成功！

------------------------------------


Log Entry : 16:27:31 2018年4月26日,星期四 

执行高压舱通道2关闭！

------------------------------------


Log Entry : 16:27:33 2018年4月26日,星期四 

执行高压舱通道2关闭成功！

------------------------------------


Log Entry : 16:27:59 2018年4月26日,星期四 

摄像头打开成功！

------------------------------------


Log Entry : 16:30:05 2018年4月26日,星期四 

摄像头关闭失败！

------------------------------------


Log Entry : 16:47:23 2018年4月26日,星期四 

摄像头打开成功！

------------------------------------


Log Entry : 16:47:38 2018年4月26日,星期四 

低压舱执行通道1打开！

------------------------------------


Log Entry : 16:47:40 2018年4月26日,星期四 

低压舱执行通道1打开成功！

------------------------------------


Log Entry : 16:47:42 2018年4月26日,星期四 

低压舱执行通道2打开！

------------------------------------


Log Entry : 16:47:44 2018年4月26日,星期四 

低压舱执行通道2打开成功！

------------------------------------


Log Entry : 16:47:45 2018年4月26日,星期四 

低压舱执行通道1关闭！

------------------------------------


Log Entry : 16:47:47 2018年4月26日,星期四 

低压舱执行通道1关闭成功！

------------------------------------


Log Entry : 16:48:51 2018年4月26日,星期四 

执行通道1打开！

------------------------------------


Log Entry : 16:49:13 2018年4月26日,星期四 

执行通道1打开失败！

------------------------------------


Log Entry : 16:49:24 2018年4月26日,星期四 

执行校时指令成功！

------------------------------------


Log Entry : 16:49:26 2018年4月26日,星期四 

执行通道1打开！

------------------------------------


Log Entry : 16:49:29 2018年4月26日,星期四 

执行通道1打开成功！

------------------------------------


Log Entry : 16:49:30 2018年4月26日,星期四 

执行通道3打开！

------------------------------------


Log Entry : 16:49:32 2018年4月26日,星期四 

执行通道3打开成功！

------------------------------------


Log Entry : 16:49:33 2018年4月26日,星期四 

执行通道4打开！

------------------------------------


Log Entry : 16:49:35 2018年4月26日,星期四 

执行通道4打开成功！

------------------------------------


Log Entry : 16:49:36 2018年4月26日,星期四 

执行通道5打开！

------------------------------------


Log Entry : 16:49:38 2018年4月26日,星期四 

执行通道5打开成功！

------------------------------------


Log Entry : 16:49:42 2018年4月26日,星期四 

执行溶解氧多次测量指令！

------------------------------------


Log Entry : 16:49:44 2018年4月26日,星期四 

执行溶解氧多次测量指令成功！

------------------------------------


Log Entry : 16:49:47 2018年4月26日,星期四 

执行CTD锚系模式指令！

------------------------------------


Log Entry : 16:49:49 2018年4月26日,星期四 

CTD锚系模式执行成功！

------------------------------------


Log Entry : 17:00:20 2018年4月26日,星期四 

执行通道1关闭！

------------------------------------


Log Entry : 17:00:22 2018年4月26日,星期四 

执行通道1关闭成功！

------------------------------------


Log Entry : 17:00:23 2018年4月26日,星期四 

执行通道3关闭！

------------------------------------


Log Entry : 17:00:24 2018年4月26日,星期四 

执行通道3关闭成功！

------------------------------------


Log Entry : 17:00:25 2018年4月26日,星期四 

执行通道4关闭！

------------------------------------


Log Entry : 17:00:27 2018年4月26日,星期四 

执行通道4关闭成功！

------------------------------------


Log Entry : 17:00:28 2018年4月26日,星期四 

执行通道5关闭！

------------------------------------


Log Entry : 17:00:29 2018年4月26日,星期四 

执行通道5关闭成功！

------------------------------------


Log Entry : 17:00:37 2018年4月26日,星期四 

摄像头关闭成功！

------------------------------------


Log Entry : 17:00:42 2018年4月26日,星期四 

低压舱执行通道2关闭！

------------------------------------


Log Entry : 17:00:43 2018年4月26日,星期四 

低压舱执行通道2关闭成功！

------------------------------------


Log Entry : 09:35:20 2018年4月27日,星期五 

摄像头打开成功！

------------------------------------


Log Entry : 09:35:28 2018年4月27日,星期五 

低压舱执行通道2打开！

------------------------------------


Log Entry : 09:35:30 2018年4月27日,星期五 

低压舱执行通道2打开成功！

------------------------------------


Log Entry : 09:36:42 2018年4月27日,星期五 

执行通道1打开！

------------------------------------


Log Entry : 09:36:45 2018年4月27日,星期五 

执行通道1打开成功！

------------------------------------


Log Entry : 09:36:47 2018年4月27日,星期五 

执行通道3打开！

------------------------------------


Log Entry : 09:36:49 2018年4月27日,星期五 

执行通道3打开成功！

------------------------------------


Log Entry : 09:36:50 2018年4月27日,星期五 

执行通道4打开！

------------------------------------


Log Entry : 09:36:52 2018年4月27日,星期五 

执行通道4打开成功！

------------------------------------


Log Entry : 09:36:53 2018年4月27日,星期五 

执行通道5打开！

------------------------------------


Log Entry : 09:36:55 2018年4月27日,星期五 

执行通道5打开成功！

------------------------------------


Log Entry : 09:37:01 2018年4月27日,星期五 

执行溶解氧多次测量指令！

------------------------------------


Log Entry : 09:37:03 2018年4月27日,星期五 

执行溶解氧多次测量指令成功！

------------------------------------


Log Entry : 09:37:05 2018年4月27日,星期五 

执行CTD锚系模式指令！

------------------------------------


Log Entry : 09:37:07 2018年4月27日,星期五 

CTD锚系模式执行成功！

------------------------------------


Log Entry : 09:54:31 2018年4月27日,星期五 

A舱温度上下限设置成功！

------------------------------------


Log Entry : 09:54:34 2018年4月27日,星期五 

B舱温度上下限设置成功！

------------------------------------


Log Entry : 09:56:41 2018年4月27日,星期五 

A舱通道2电压电流上下限设置成功！

------------------------------------


Log Entry : 09:56:43 2018年4月27日,星期五 

A舱通道1电压电流上下限设置成功！

------------------------------------


Log Entry : 09:57:35 2018年4月27日,星期五 

B舱通道1电压电流上下限设置成功！

------------------------------------


Log Entry : 09:57:37 2018年4月27日,星期五 

B舱通道2电压电流上下限设置成功！

------------------------------------


Log Entry : 09:57:44 2018年4月27日,星期五 

校时指令执行成功！

------------------------------------


Log Entry : 10:03:05 2018年4月27日,星期五 

执行设置溶解氧时间间隔：0005

------------------------------------


Log Entry : 10:03:07 2018年4月27日,星期五 

执行设置溶解氧时间间隔失败！

------------------------------------


Log Entry : 10:03:08 2018年4月27日,星期五 

执行设置溶解氧时间间隔：0005

------------------------------------


Log Entry : 10:03:10 2018年4月27日,星期五 

执行设置溶解氧时间间隔失败！

------------------------------------


Log Entry : 10:04:28 2018年4月27日,星期五 

执行设置溶解氧时间间隔：0005

------------------------------------


Log Entry : 10:04:29 2018年4月27日,星期五 

执行设置溶解氧时间间隔失败！

------------------------------------


Log Entry : 12:06:18 2018年4月27日,星期五 

执行通道1打开！

------------------------------------


Log Entry : 12:06:20 2018年4月27日,星期五 

执行通道1打开成功！

------------------------------------


Log Entry : 12:06:21 2018年4月27日,星期五 

执行通道3打开！

------------------------------------


Log Entry : 12:06:22 2018年4月27日,星期五 

执行通道3打开成功！

------------------------------------


Log Entry : 12:06:23 2018年4月27日,星期五 

执行通道4打开！

------------------------------------


Log Entry : 12:06:24 2018年4月27日,星期五 

执行通道4打开成功！

------------------------------------


Log Entry : 12:06:25 2018年4月27日,星期五 

执行通道5打开！

------------------------------------


Log Entry : 12:06:27 2018年4月27日,星期五 

执行通道5打开成功！

------------------------------------


Log Entry : 12:06:34 2018年4月27日,星期五 

低压舱执行通道2打开！

------------------------------------


Log Entry : 12:06:35 2018年4月27日,星期五 

低压舱执行通道2打开成功！

------------------------------------


Log Entry : 13:21:50 2018年4月27日,星期五 

执行通道1关闭！

------------------------------------


Log Entry : 13:21:52 2018年4月27日,星期五 

执行通道1关闭成功！

------------------------------------


Log Entry : 13:21:53 2018年4月27日,星期五 

执行通道3关闭！

------------------------------------


Log Entry : 13:21:55 2018年4月27日,星期五 

执行通道3关闭成功！

------------------------------------


Log Entry : 13:21:55 2018年4月27日,星期五 

执行通道4关闭！

------------------------------------


Log Entry : 13:21:57 2018年4月27日,星期五 

执行通道4关闭成功！

------------------------------------


Log Entry : 13:21:58 2018年4月27日,星期五 

执行通道5关闭！

------------------------------------


Log Entry : 13:22:00 2018年4月27日,星期五 

执行通道5关闭成功！

------------------------------------


Log Entry : 13:22:24 2018年4月27日,星期五 

低压舱执行通道2关闭！

------------------------------------


Log Entry : 13:22:26 2018年4月27日,星期五 

低压舱执行通道2关闭成功！

------------------------------------


Log Entry : 11:09:32 2018年4月28日,星期六 

执行高压舱通道1打开！

------------------------------------


Log Entry : 11:09:36 2018年4月28日,星期六 

执行高压舱通道1打开失败！

------------------------------------


Log Entry : 11:09:48 2018年4月28日,星期六 

执行高压舱通道1打开！

------------------------------------


Log Entry : 11:09:50 2018年4月28日,星期六 

执行高压舱通道1打开失败！

------------------------------------


Log Entry : 11:10:01 2018年4月28日,星期六 

执行高压舱通道1打开！

------------------------------------


Log Entry : 11:10:03 2018年4月28日,星期六 

执行高压舱通道1打开失败！

------------------------------------


Log Entry : 11:10:19 2018年4月28日,星期六 

执行高压舱通道1打开！

------------------------------------


Log Entry : 11:10:21 2018年4月28日,星期六 

执行高压舱通道1打开失败！

------------------------------------


Log Entry : 11:10:35 2018年4月28日,星期六 

执行高压舱通道1打开！

------------------------------------


Log Entry : 11:10:37 2018年4月28日,星期六 

执行高压舱通道1打开失败！

------------------------------------


Log Entry : 11:10:58 2018年4月28日,星期六 

执行高压舱通道1打开！

------------------------------------


Log Entry : 11:11:00 2018年4月28日,星期六 

执行高压舱通道1打开成功！

------------------------------------


Log Entry : 11:11:02 2018年4月28日,星期六 

执行高压舱通道2打开！

------------------------------------


Log Entry : 11:11:04 2018年4月28日,星期六 

执行高压舱通道2打开成功！

------------------------------------


Log Entry : 11:11:09 2018年4月28日,星期六 

低压舱执行通道1打开！

------------------------------------


Log Entry : 11:11:11 2018年4月28日,星期六 

低压舱执行通道1打开成功！

------------------------------------


Log Entry : 11:11:13 2018年4月28日,星期六 

低压舱执行通道2打开！

------------------------------------


Log Entry : 11:11:15 2018年4月28日,星期六 

低压舱执行通道2打开成功！

------------------------------------


Log Entry : 11:11:26 2018年4月28日,星期六 

摄像头打开成功！

------------------------------------


Log Entry : 11:11:33 2018年4月28日,星期六 

执行高压舱通道1关闭！

------------------------------------


Log Entry : 11:11:35 2018年4月28日,星期六 

执行高压舱通道1关闭成功！

------------------------------------


Log Entry : 11:11:38 2018年4月28日,星期六 

执行高压舱通道2关闭！

------------------------------------


Log Entry : 11:11:40 2018年4月28日,星期六 

执行高压舱通道2关闭成功！

------------------------------------


Log Entry : 11:11:42 2018年4月28日,星期六 

低压舱执行通道1关闭！

------------------------------------


Log Entry : 11:11:44 2018年4月28日,星期六 

低压舱执行通道1关闭成功！

------------------------------------


Log Entry : 11:11:45 2018年4月28日,星期六 

低压舱执行通道2关闭！

------------------------------------


Log Entry : 11:11:47 2018年4月28日,星期六 

低压舱执行通道2关闭成功！

------------------------------------


Log Entry : 09:51:33 2018年5月2日,星期三 

摄像头打开成功！

------------------------------------


Log Entry : 09:51:44 2018年5月2日,星期三 

执行高压舱通道1打开！

------------------------------------


Log Entry : 09:51:46 2018年5月2日,星期三 

执行高压舱通道1打开成功！

------------------------------------


Log Entry : 09:51:48 2018年5月2日,星期三 

执行高压舱通道2打开！

------------------------------------


Log Entry : 09:51:50 2018年5月2日,星期三 

执行高压舱通道2打开成功！

------------------------------------


Log Entry : 09:51:52 2018年5月2日,星期三 

低压舱执行通道1打开！

------------------------------------


Log Entry : 09:51:54 2018年5月2日,星期三 

低压舱执行通道1打开成功！

------------------------------------


Log Entry : 09:51:56 2018年5月2日,星期三 

低压舱执行通道2打开！

------------------------------------


Log Entry : 09:51:58 2018年5月2日,星期三 

低压舱执行通道2打开成功！

------------------------------------


Log Entry : 09:54:43 2018年5月2日,星期三 

执行高压舱通道1关闭！

------------------------------------


Log Entry : 09:54:46 2018年5月2日,星期三 

执行高压舱通道1关闭成功！

------------------------------------


Log Entry : 09:54:47 2018年5月2日,星期三 

执行高压舱通道2关闭！

------------------------------------


Log Entry : 09:54:49 2018年5月2日,星期三 

执行高压舱通道2关闭成功！

------------------------------------


Log Entry : 09:56:00 2018年5月2日,星期三 

低压舱执行通道1关闭！

------------------------------------


Log Entry : 09:56:03 2018年5月2日,星期三 

低压舱执行通道1关闭成功！

------------------------------------


Log Entry : 09:56:04 2018年5月2日,星期三 

低压舱执行通道2关闭！

------------------------------------


Log Entry : 09:56:06 2018年5月2日,星期三 

低压舱执行通道2关闭成功！

------------------------------------


Log Entry : 10:21:36 2018年5月2日,星期三 

摄像头关闭成功！

------------------------------------


Log Entry : 10:40:47 2018年5月2日,星期三 

摄像头打开成功！

------------------------------------


Log Entry : 11:39:45 2018年5月2日,星期三 

执行高压舱通道1打开！

------------------------------------


Log Entry : 11:39:47 2018年5月2日,星期三 

执行高压舱通道1打开成功！

------------------------------------


Log Entry : 11:39:48 2018年5月2日,星期三 

执行高压舱通道2打开！

------------------------------------


Log Entry : 11:39:50 2018年5月2日,星期三 

执行高压舱通道2打开成功！

------------------------------------


Log Entry : 11:39:59 2018年5月2日,星期三 

低压舱执行通道1打开！

------------------------------------


Log Entry : 11:40:01 2018年5月2日,星期三 

低压舱执行通道1打开成功！

------------------------------------


Log Entry : 11:40:03 2018年5月2日,星期三 

低压舱执行通道2打开！

------------------------------------


Log Entry : 11:40:06 2018年5月2日,星期三 

低压舱执行通道2打开成功！

------------------------------------


Log Entry : 11:42:22 2018年5月2日,星期三 

摄像头关闭成功！

------------------------------------


Log Entry : 13:26:03 2018年5月2日,星期三 

摄像头打开成功！

------------------------------------


Log Entry : 13:31:39 2018年5月2日,星期三 

摄像头关闭成功！

------------------------------------


Log Entry : 13:32:17 2018年5月2日,星期三 

摄像头打开成功！

------------------------------------


Log Entry : 13:44:51 2018年5月2日,星期三 

摄像头打开成功！

------------------------------------


Log Entry : 15:18:28 2018年5月2日,星期三 

执行通道2打开！

------------------------------------


Log Entry : 15:18:31 2018年5月2日,星期三 

执行通道2打开成功！

------------------------------------


Log Entry : 15:19:02 2018年5月2日,星期三 

执行设置甲烷报警阈值，电流上限:01.000电流下限:00.000电压上限:26.000电压下限:10.000

------------------------------------


Log Entry : 15:19:04 2018年5月2日,星期三 

执行设置甲烷报警阈值成功！

------------------------------------


Log Entry : 15:19:26 2018年5月2日,星期三 

执行设置甲烷报警阈值，电流上限:01.000电流下限:00.000电压上限:14.000电压下限:10.000

------------------------------------


Log Entry : 15:19:28 2018年5月2日,星期三 

执行设置甲烷报警阈值成功！

------------------------------------


Log Entry : 15:21:39 2018年5月2日,星期三 

执行通道1打开！

------------------------------------


Log Entry : 15:21:41 2018年5月2日,星期三 

执行通道1打开成功！

------------------------------------


Log Entry : 15:21:45 2018年5月2日,星期三 

执行溶解氧多次测量指令！

------------------------------------


Log Entry : 15:21:47 2018年5月2日,星期三 

执行溶解氧多次测量指令成功！

------------------------------------


Log Entry : 15:22:03 2018年5月2日,星期三 

执行通道3打开！

------------------------------------


Log Entry : 15:22:05 2018年5月2日,星期三 

执行通道3打开成功！

------------------------------------


Log Entry : 15:25:27 2018年5月2日,星期三 

执行通道4打开！

------------------------------------


Log Entry : 15:25:30 2018年5月2日,星期三 

执行通道4打开成功！

------------------------------------


Log Entry : 15:28:10 2018年5月2日,星期三 

执行CTD锚系模式指令！

------------------------------------


Log Entry : 15:28:13 2018年5月2日,星期三 

CTD锚系模式执行成功！

------------------------------------


Log Entry : 15:35:53 2018年5月2日,星期三 

执行通道1关闭！

------------------------------------


Log Entry : 15:35:55 2018年5月2日,星期三 

执行通道1关闭成功！

------------------------------------


Log Entry : 15:35:56 2018年5月2日,星期三 

执行通道2关闭！

------------------------------------


Log Entry : 15:35:58 2018年5月2日,星期三 

执行通道2关闭成功！

------------------------------------


Log Entry : 15:35:59 2018年5月2日,星期三 

执行通道3关闭！

------------------------------------


Log Entry : 15:36:01 2018年5月2日,星期三 

执行通道3关闭成功！

------------------------------------


Log Entry : 15:36:02 2018年5月2日,星期三 

执行通道4关闭！

------------------------------------


Log Entry : 15:36:04 2018年5月2日,星期三 

执行通道4关闭成功！

------------------------------------


Log Entry : 15:40:04 2018年5月2日,星期三 

执行通道3打开！

------------------------------------


Log Entry : 15:40:06 2018年5月2日,星期三 

执行通道3打开成功！

------------------------------------


Log Entry : 15:43:59 2018年5月2日,星期三 

执行设置甲烷报警阈值，电流上限:01.000电流下限:00.000电压上限:14.000电压下限:10.000

------------------------------------


Log Entry : 15:44:01 2018年5月2日,星期三 

执行设置甲烷报警阈值成功！

------------------------------------


Log Entry : 15:44:04 2018年5月2日,星期三 

执行通道3打开！

------------------------------------


Log Entry : 15:44:06 2018年5月2日,星期三 

执行通道3打开成功！

------------------------------------


Log Entry : 15:47:20 2018年5月2日,星期三 

执行通道3关闭！

------------------------------------


Log Entry : 15:47:22 2018年5月2日,星期三 

执行通道3关闭成功！

------------------------------------


Log Entry : 15:55:35 2018年5月2日,星期三 

执行通道1打开！

------------------------------------


Log Entry : 15:55:39 2018年5月2日,星期三 

执行通道1打开成功！

------------------------------------


Log Entry : 15:55:59 2018年5月2日,星期三 

执行通道1关闭！

------------------------------------


Log Entry : 15:56:01 2018年5月2日,星期三 

执行通道1关闭成功！

------------------------------------


Log Entry : 15:56:14 2018年5月2日,星期三 

执行通道1打开！

------------------------------------


Log Entry : 15:56:17 2018年5月2日,星期三 

执行通道1打开成功！

------------------------------------


Log Entry : 16:25:16 2018年5月2日,星期三 

执行设置甲烷报警阈值，电流上限:01.000电流下限:00.000电压上限:14.000电压下限:10.000

------------------------------------


Log Entry : 16:25:18 2018年5月2日,星期三 

执行设置甲烷报警阈值成功！

------------------------------------


Log Entry : 16:25:30 2018年5月2日,星期三 

执行通道1关闭！

------------------------------------


Log Entry : 16:25:32 2018年5月2日,星期三 

执行通道1关闭成功！

------------------------------------


Log Entry : 16:25:34 2018年5月2日,星期三 

执行通道1打开！

------------------------------------


Log Entry : 16:25:36 2018年5月2日,星期三 

执行通道1打开成功！

------------------------------------


Log Entry : 16:25:39 2018年5月2日,星期三 

执行通道3打开！

------------------------------------


Log Entry : 16:25:40 2018年5月2日,星期三 

执行通道3打开成功！

------------------------------------


Log Entry : 16:25:42 2018年5月2日,星期三 

执行通道2打开！

------------------------------------


Log Entry : 16:25:44 2018年5月2日,星期三 

执行通道2打开成功！

------------------------------------


Log Entry : 16:25:45 2018年5月2日,星期三 

执行通道4打开！

------------------------------------


Log Entry : 16:25:47 2018年5月2日,星期三 

执行通道4打开成功！

------------------------------------


Log Entry : 16:25:52 2018年5月2日,星期三 

执行溶解氧多次测量指令！

------------------------------------


Log Entry : 16:25:54 2018年5月2日,星期三 

执行溶解氧多次测量指令成功！

------------------------------------


Log Entry : 16:25:57 2018年5月2日,星期三 

执行CTD锚系模式指令！

------------------------------------


Log Entry : 16:25:59 2018年5月2日,星期三 

CTD锚系模式执行成功！

------------------------------------


Log Entry : 16:59:10 2018年5月2日,星期三 

执行校时指令成功！

------------------------------------


Log Entry : 17:01:35 2018年5月2日,星期三 

执行通道1打开！

------------------------------------


Log Entry : 17:01:37 2018年5月2日,星期三 

执行通道1打开成功！

------------------------------------


Log Entry : 17:01:38 2018年5月2日,星期三 

执行通道2打开！

------------------------------------


Log Entry : 17:01:40 2018年5月2日,星期三 

执行通道2打开成功！

------------------------------------


Log Entry : 17:01:41 2018年5月2日,星期三 

执行通道3打开！

------------------------------------


Log Entry : 17:01:43 2018年5月2日,星期三 

执行通道3打开成功！

------------------------------------


Log Entry : 17:01:43 2018年5月2日,星期三 

执行通道4打开！

------------------------------------


Log Entry : 17:01:45 2018年5月2日,星期三 

执行通道4打开成功！

------------------------------------


Log Entry : 17:01:45 2018年5月2日,星期三 

执行通道5打开！

------------------------------------


Log Entry : 17:01:48 2018年5月2日,星期三 

执行通道5打开成功！

------------------------------------


Log Entry : 17:01:55 2018年5月2日,星期三 

执行通道1关闭！

------------------------------------


Log Entry : 17:01:56 2018年5月2日,星期三 

执行通道1关闭成功！

------------------------------------


Log Entry : 17:01:57 2018年5月2日,星期三 

执行通道2关闭！

------------------------------------


Log Entry : 17:01:58 2018年5月2日,星期三 

执行通道2关闭成功！

------------------------------------


Log Entry : 17:01:59 2018年5月2日,星期三 

执行通道3关闭！

------------------------------------


Log Entry : 17:02:01 2018年5月2日,星期三 

执行通道3关闭成功！

------------------------------------


Log Entry : 17:02:01 2018年5月2日,星期三 

执行通道4关闭！

------------------------------------


Log Entry : 17:02:03 2018年5月2日,星期三 

执行通道4关闭成功！

------------------------------------


Log Entry : 17:02:04 2018年5月2日,星期三 

执行通道5关闭！

------------------------------------


Log Entry : 17:02:06 2018年5月2日,星期三 

执行通道5关闭成功！

------------------------------------


Log Entry : 17:02:18 2018年5月2日,星期三 

摄像头关闭成功！

------------------------------------


Log Entry : 09:33:25 2018年5月3日,星期四 

低压舱执行通道2打开！

------------------------------------


Log Entry : 09:33:33 2018年5月3日,星期四 

低压舱执行通道2打开失败！

------------------------------------


Log Entry : 09:33:38 2018年5月3日,星期四 

低压舱执行通道2打开！

------------------------------------


Log Entry : 09:33:40 2018年5月3日,星期四 

低压舱执行通道2打开成功！

------------------------------------


Log Entry : 09:33:54 2018年5月3日,星期四 

摄像头打开成功！

------------------------------------


Log Entry : 09:36:21 2018年5月3日,星期四 

执行通道1打开！

------------------------------------


Log Entry : 09:36:23 2018年5月3日,星期四 

执行通道1打开成功！

------------------------------------


Log Entry : 09:36:24 2018年5月3日,星期四 

执行通道2打开！

------------------------------------


Log Entry : 09:36:26 2018年5月3日,星期四 

执行通道2打开成功！

------------------------------------


Log Entry : 09:36:29 2018年5月3日,星期四 

执行通道3打开！

------------------------------------


Log Entry : 09:36:31 2018年5月3日,星期四 

执行通道3打开成功！

------------------------------------


Log Entry : 09:36:35 2018年5月3日,星期四 

执行通道4打开！

------------------------------------


Log Entry : 09:36:37 2018年5月3日,星期四 

执行通道4打开成功！

------------------------------------


Log Entry : 09:37:00 2018年5月3日,星期四 

执行设置甲烷报警阈值，电流上限:01.000电流下限:00.000电压上限:14.000电压下限:10.000

------------------------------------


Log Entry : 09:37:03 2018年5月3日,星期四 

执行设置甲烷报警阈值成功！

------------------------------------


Log Entry : 09:37:11 2018年5月3日,星期四 

执行溶解氧多次测量指令！

------------------------------------


Log Entry : 09:37:13 2018年5月3日,星期四 

执行溶解氧多次测量指令成功！

------------------------------------


Log Entry : 09:37:18 2018年5月3日,星期四 

执行CTD锚系模式指令！

------------------------------------


Log Entry : 09:37:19 2018年5月3日,星期四 

CTD锚系模式执行成功！

------------------------------------


Log Entry : 11:22:46 2018年5月3日,星期四 

执行通道1关闭！

------------------------------------


Log Entry : 11:22:48 2018年5月3日,星期四 

执行通道1关闭成功！

------------------------------------


Log Entry : 11:22:49 2018年5月3日,星期四 

执行通道2关闭！

------------------------------------


Log Entry : 11:22:51 2018年5月3日,星期四 

执行通道2关闭成功！

------------------------------------


Log Entry : 11:22:51 2018年5月3日,星期四 

执行通道3关闭！

------------------------------------


Log Entry : 11:22:53 2018年5月3日,星期四 

执行通道3关闭成功！

------------------------------------


Log Entry : 11:22:53 2018年5月3日,星期四 

执行通道4关闭！

------------------------------------


Log Entry : 11:22:55 2018年5月3日,星期四 

执行通道4关闭成功！

------------------------------------


Log Entry : 11:22:59 2018年5月3日,星期四 

低压舱执行通道2关闭！

------------------------------------


Log Entry : 11:23:00 2018年5月3日,星期四 

低压舱执行通道2关闭成功！

------------------------------------


Log Entry : 11:23:07 2018年5月3日,星期四 

摄像头关闭成功！

------------------------------------


Log Entry : 13:48:28 2018年5月3日,星期四 

低压舱执行通道2打开！

------------------------------------


Log Entry : 13:48:31 2018年5月3日,星期四 

低压舱执行通道2打开成功！

------------------------------------


Log Entry : 13:50:13 2018年5月3日,星期四 

执行通道1打开！

------------------------------------


Log Entry : 13:50:16 2018年5月3日,星期四 

执行通道1打开成功！

------------------------------------


Log Entry : 13:50:18 2018年5月3日,星期四 

执行通道2打开！

------------------------------------


Log Entry : 13:50:21 2018年5月3日,星期四 

执行通道2打开成功！

------------------------------------


Log Entry : 13:50:23 2018年5月3日,星期四 

执行通道3打开！

------------------------------------


Log Entry : 13:50:27 2018年5月3日,星期四 

执行通道3打开成功！

------------------------------------


Log Entry : 13:50:29 2018年5月3日,星期四 

执行通道4打开！

------------------------------------


Log Entry : 13:50:32 2018年5月3日,星期四 

执行通道4打开成功！

------------------------------------


Log Entry : 13:50:43 2018年5月3日,星期四 

执行溶解氧多次测量指令！

------------------------------------


Log Entry : 13:50:45 2018年5月3日,星期四 

执行溶解氧多次测量指令成功！

------------------------------------


Log Entry : 13:52:33 2018年5月3日,星期四 

执行CTD锚系模式指令！

------------------------------------


Log Entry : 13:52:35 2018年5月3日,星期四 

CTD锚系模式执行成功！

------------------------------------


Log Entry : 14:04:33 2018年5月3日,星期四 

摄像头打开成功！

------------------------------------


Log Entry : 15:31:29 2018年5月3日,星期四 

执行通道1关闭！

------------------------------------


Log Entry : 15:31:32 2018年5月3日,星期四 

执行通道1关闭成功！

------------------------------------


Log Entry : 15:31:34 2018年5月3日,星期四 

执行通道2关闭！

------------------------------------


Log Entry : 15:31:37 2018年5月3日,星期四 

执行通道2关闭成功！

------------------------------------


Log Entry : 15:31:38 2018年5月3日,星期四 

执行通道3关闭！

------------------------------------


Log Entry : 15:31:41 2018年5月3日,星期四 

执行通道3关闭成功！

------------------------------------


Log Entry : 15:31:42 2018年5月3日,星期四 

执行通道4关闭！

------------------------------------


Log Entry : 15:31:45 2018年5月3日,星期四 

执行通道4关闭成功！

------------------------------------


Log Entry : 15:31:50 2018年5月3日,星期四 

低压舱执行通道2关闭！

------------------------------------


Log Entry : 15:31:53 2018年5月3日,星期四 

低压舱执行通道2关闭成功！

------------------------------------


Log Entry : 15:48:16 2018年5月3日,星期四 

摄像头打开成功！

------------------------------------


Log Entry : 15:48:19 2018年5月3日,星期四 

摄像头关闭成功！

------------------------------------


Log Entry : 15:48:22 2018年5月3日,星期四 

摄像头打开成功！

------------------------------------


Log Entry : 15:48:49 2018年5月3日,星期四 

低压舱执行通道2打开！

------------------------------------


Log Entry : 15:48:51 2018年5月3日,星期四 

低压舱执行通道2打开成功！

------------------------------------


Log Entry : 15:50:18 2018年5月3日,星期四 

执行通道1打开！

------------------------------------


Log Entry : 15:50:21 2018年5月3日,星期四 

执行通道1打开成功！

------------------------------------


Log Entry : 15:50:22 2018年5月3日,星期四 

执行通道2打开！

------------------------------------


Log Entry : 15:50:26 2018年5月3日,星期四 

执行通道2打开成功！

------------------------------------


Log Entry : 15:50:27 2018年5月3日,星期四 

执行通道3打开！

------------------------------------


Log Entry : 15:50:30 2018年5月3日,星期四 

执行通道3打开成功！

------------------------------------


Log Entry : 15:50:32 2018年5月3日,星期四 

执行通道4打开！

------------------------------------


Log Entry : 15:50:34 2018年5月3日,星期四 

执行通道4打开成功！

------------------------------------


Log Entry : 15:50:46 2018年5月3日,星期四 

执行溶解氧多次测量指令！

------------------------------------


Log Entry : 15:50:48 2018年5月3日,星期四 

执行溶解氧多次测量指令成功！

------------------------------------


Log Entry : 15:50:55 2018年5月3日,星期四 

执行CTD锚系模式指令！

------------------------------------


Log Entry : 15:50:57 2018年5月3日,星期四 

CTD锚系模式执行成功！

------------------------------------


Log Entry : 16:07:32 2018年5月3日,星期四 

低压舱执行通道2关闭！

------------------------------------


Log Entry : 16:07:34 2018年5月3日,星期四 

低压舱执行通道2关闭成功！

------------------------------------


Log Entry : 16:18:13 2018年5月3日,星期四 

低压舱执行通道1打开！

------------------------------------


Log Entry : 16:18:15 2018年5月3日,星期四 

低压舱执行通道1打开成功！

------------------------------------


Log Entry : 16:18:26 2018年5月3日,星期四 

低压舱执行通道2打开！

------------------------------------


Log Entry : 16:18:28 2018年5月3日,星期四 

低压舱执行通道2打开成功！

------------------------------------


Log Entry : 16:18:32 2018年5月3日,星期四 

低压舱执行通道1关闭！

------------------------------------


Log Entry : 16:18:36 2018年5月3日,星期四 

低压舱执行通道1关闭成功！

------------------------------------


Log Entry : 16:19:49 2018年5月3日,星期四 

执行通道1关闭！

------------------------------------


Log Entry : 16:19:52 2018年5月3日,星期四 

执行通道1关闭成功！

------------------------------------


Log Entry : 16:19:52 2018年5月3日,星期四 

执行通道2关闭！

------------------------------------


Log Entry : 16:19:54 2018年5月3日,星期四 

执行通道2关闭成功！

------------------------------------


Log Entry : 16:19:54 2018年5月3日,星期四 

执行通道3关闭！

------------------------------------


Log Entry : 16:19:56 2018年5月3日,星期四 

执行通道3关闭成功！

------------------------------------


Log Entry : 16:19:57 2018年5月3日,星期四 

执行通道4关闭！

------------------------------------


Log Entry : 16:19:59 2018年5月3日,星期四 

执行通道4关闭成功！

------------------------------------


Log Entry : 16:20:00 2018年5月3日,星期四 

执行通道1打开！

------------------------------------


Log Entry : 16:20:02 2018年5月3日,星期四 

执行通道1打开成功！

------------------------------------


Log Entry : 16:20:03 2018年5月3日,星期四 

执行通道2打开！

------------------------------------


Log Entry : 16:20:05 2018年5月3日,星期四 

执行通道2打开成功！

------------------------------------


Log Entry : 16:20:05 2018年5月3日,星期四 

执行通道3打开！

------------------------------------


Log Entry : 16:20:07 2018年5月3日,星期四 

执行通道3打开成功！

------------------------------------


Log Entry : 16:20:07 2018年5月3日,星期四 

执行通道4打开！

------------------------------------


Log Entry : 16:20:09 2018年5月3日,星期四 

执行通道4打开成功！

------------------------------------


Log Entry : 16:20:13 2018年5月3日,星期四 

执行溶解氧多次测量指令！

------------------------------------


Log Entry : 16:20:15 2018年5月3日,星期四 

执行溶解氧多次测量指令成功！

------------------------------------


Log Entry : 16:20:18 2018年5月3日,星期四 

执行CTD锚系模式指令！

------------------------------------


Log Entry : 16:20:20 2018年5月3日,星期四 

CTD锚系模式执行成功！

------------------------------------


Log Entry : 17:05:41 2018年5月3日,星期四 

低压舱执行通道2关闭！

------------------------------------


Log Entry : 17:05:43 2018年5月3日,星期四 

低压舱执行通道2关闭成功！

------------------------------------


Log Entry : 09:20:26 2018年5月4日,星期五 

低压舱执行通道2打开！

------------------------------------


Log Entry : 09:20:50 2018年5月4日,星期五 

执行高压舱通道1打开！

------------------------------------


Log Entry : 09:20:51 2018年5月4日,星期五 

执行高压舱通道1打开失败！

------------------------------------


Log Entry : 09:57:51 2018年5月4日,星期五 

低压舱执行通道2打开！

------------------------------------


Log Entry : 09:57:54 2018年5月4日,星期五 

低压舱执行通道2打开成功！

------------------------------------


Log Entry : 09:58:56 2018年5月4日,星期五 

执行通道1打开！

------------------------------------


Log Entry : 09:58:59 2018年5月4日,星期五 

执行通道1打开成功！

------------------------------------


Log Entry : 09:59:00 2018年5月4日,星期五 

执行通道2打开！

------------------------------------


Log Entry : 09:59:03 2018年5月4日,星期五 

执行通道2打开成功！

------------------------------------


Log Entry : 09:59:06 2018年5月4日,星期五 

执行通道3打开！

------------------------------------


Log Entry : 09:59:09 2018年5月4日,星期五 

执行通道3打开成功！

------------------------------------


Log Entry : 09:59:10 2018年5月4日,星期五 

执行通道4打开！

------------------------------------


Log Entry : 09:59:13 2018年5月4日,星期五 

执行通道4打开成功！

------------------------------------


Log Entry : 09:59:18 2018年5月4日,星期五 

执行溶解氧多次测量指令！

------------------------------------


Log Entry : 09:59:20 2018年5月4日,星期五 

执行溶解氧多次测量指令成功！

------------------------------------


Log Entry : 09:59:26 2018年5月4日,星期五 

执行CTD锚系模式指令！

------------------------------------


Log Entry : 09:59:28 2018年5月4日,星期五 

CTD锚系模式执行成功！

------------------------------------


Log Entry : 11:38:10 2018年5月4日,星期五 

执行通道4关闭！

------------------------------------


Log Entry : 11:38:13 2018年5月4日,星期五 

执行通道4关闭成功！

------------------------------------


Log Entry : 11:38:16 2018年5月4日,星期五 

执行通道3关闭！

------------------------------------


Log Entry : 11:38:19 2018年5月4日,星期五 

执行通道3关闭成功！

------------------------------------


Log Entry : 11:38:20 2018年5月4日,星期五 

执行通道2关闭！

------------------------------------


Log Entry : 11:38:23 2018年5月4日,星期五 

执行通道2关闭成功！

------------------------------------


Log Entry : 11:38:25 2018年5月4日,星期五 

执行通道1关闭！

------------------------------------


Log Entry : 11:38:27 2018年5月4日,星期五 

执行通道1关闭成功！

------------------------------------


Log Entry : 11:38:36 2018年5月4日,星期五 

低压舱执行通道2关闭！

------------------------------------


Log Entry : 11:38:41 2018年5月4日,星期五 

低压舱执行通道2关闭成功！

------------------------------------


Log Entry : 13:22:28 2018年5月4日,星期五 

低压舱执行通道2打开！

------------------------------------


Log Entry : 13:22:31 2018年5月4日,星期五 

低压舱执行通道2打开成功！

------------------------------------


Log Entry : 13:23:35 2018年5月4日,星期五 

执行通道1打开！

------------------------------------


Log Entry : 13:23:38 2018年5月4日,星期五 

执行通道1打开成功！

------------------------------------


Log Entry : 13:23:39 2018年5月4日,星期五 

执行通道2打开！

------------------------------------


Log Entry : 13:23:42 2018年5月4日,星期五 

执行通道2打开成功！

------------------------------------


Log Entry : 13:23:43 2018年5月4日,星期五 

执行通道3打开！

------------------------------------


Log Entry : 13:23:46 2018年5月4日,星期五 

执行通道3打开成功！

------------------------------------


Log Entry : 13:23:47 2018年5月4日,星期五 

执行通道4打开！

------------------------------------


Log Entry : 13:23:49 2018年5月4日,星期五 

执行通道4打开成功！

------------------------------------


Log Entry : 13:23:55 2018年5月4日,星期五 

执行溶解氧多次测量指令！

------------------------------------


Log Entry : 13:23:57 2018年5月4日,星期五 

执行溶解氧多次测量指令成功！

------------------------------------


Log Entry : 13:24:03 2018年5月4日,星期五 

执行CTD锚系模式指令！

------------------------------------


Log Entry : 13:24:05 2018年5月4日,星期五 

CTD锚系模式执行成功！

------------------------------------


Log Entry : 13:56:47 2018年5月4日,星期五 

摄像头打开成功！

------------------------------------


Log Entry : 15:23:11 2018年5月4日,星期五 

摄像头关闭成功！

------------------------------------


Log Entry : 15:23:55 2018年5月4日,星期五 

摄像头打开成功！

------------------------------------


Log Entry : 16:57:17 2018年5月4日,星期五 

低压舱执行通道2打开！

------------------------------------


Log Entry : 16:57:19 2018年5月4日,星期五 

低压舱执行通道2打开成功！

------------------------------------


Log Entry : 16:57:21 2018年5月4日,星期五 

执行通道1打开！

------------------------------------


Log Entry : 16:57:24 2018年5月4日,星期五 

执行通道1打开成功！

------------------------------------


Log Entry : 16:57:25 2018年5月4日,星期五 

执行通道2打开！

------------------------------------


Log Entry : 16:57:27 2018年5月4日,星期五 

执行通道2打开成功！

------------------------------------


Log Entry : 16:57:27 2018年5月4日,星期五 

执行通道3打开！

------------------------------------


Log Entry : 16:57:30 2018年5月4日,星期五 

执行通道3打开成功！

------------------------------------


Log Entry : 16:57:30 2018年5月4日,星期五 

执行通道4打开！

------------------------------------


Log Entry : 16:57:32 2018年5月4日,星期五 

执行通道4打开成功！

------------------------------------


Log Entry : 16:57:32 2018年5月4日,星期五 

执行通道1关闭！

------------------------------------


Log Entry : 16:57:34 2018年5月4日,星期五 

执行通道1关闭成功！

------------------------------------


Log Entry : 16:57:35 2018年5月4日,星期五 

执行通道2关闭！

------------------------------------


Log Entry : 16:57:36 2018年5月4日,星期五 

执行通道2关闭成功！

------------------------------------


Log Entry : 16:57:37 2018年5月4日,星期五 

执行通道3关闭！

------------------------------------


Log Entry : 16:57:39 2018年5月4日,星期五 

执行通道3关闭成功！

------------------------------------


Log Entry : 16:57:39 2018年5月4日,星期五 

执行通道4关闭！

------------------------------------


Log Entry : 16:57:41 2018年5月4日,星期五 

执行通道4关闭成功！

------------------------------------


Log Entry : 16:57:51 2018年5月4日,星期五 

摄像头关闭成功！

------------------------------------


Log Entry : 16:58:00 2018年5月4日,星期五 

低压舱执行通道2关闭！

------------------------------------


Log Entry : 16:58:02 2018年5月4日,星期五 

低压舱执行通道2关闭成功！

------------------------------------


Log Entry : 09:45:05 2018年5月7日,星期一 

执行高压舱通道1打开！

------------------------------------


Log Entry : 09:45:08 2018年5月7日,星期一 

执行高压舱通道1打开成功！

------------------------------------


Log Entry : 09:45:11 2018年5月7日,星期一 

执行高压舱通道2打开！

------------------------------------


Log Entry : 09:45:13 2018年5月7日,星期一 

执行高压舱通道2打开成功！

------------------------------------


Log Entry : 09:45:18 2018年5月7日,星期一 

低压舱执行通道2打开！

------------------------------------


Log Entry : 09:45:20 2018年5月7日,星期一 

低压舱执行通道2打开成功！

------------------------------------


Log Entry : 09:45:26 2018年5月7日,星期一 

低压舱执行通道1打开！

------------------------------------


Log Entry : 09:45:29 2018年5月7日,星期一 

低压舱执行通道1打开成功！

------------------------------------


Log Entry : 09:45:55 2018年5月7日,星期一 

执行高压舱通道2关闭！

------------------------------------


Log Entry : 09:45:58 2018年5月7日,星期一 

执行高压舱通道2关闭成功！

------------------------------------


Log Entry : 09:46:03 2018年5月7日,星期一 

执行高压舱通道1关闭！

------------------------------------


Log Entry : 09:46:05 2018年5月7日,星期一 

执行高压舱通道1关闭成功！

------------------------------------


Log Entry : 09:46:07 2018年5月7日,星期一 

低压舱执行通道1关闭！

------------------------------------


Log Entry : 09:46:10 2018年5月7日,星期一 

低压舱执行通道1关闭成功！

------------------------------------


Log Entry : 09:46:34 2018年5月7日,星期一 

摄像头打开成功！

------------------------------------


Log Entry : 09:46:45 2018年5月7日,星期一 

执行通道1打开！

------------------------------------


Log Entry : 09:46:48 2018年5月7日,星期一 

执行通道1打开成功！

------------------------------------


Log Entry : 09:46:49 2018年5月7日,星期一 

执行通道2打开！

------------------------------------


Log Entry : 09:46:51 2018年5月7日,星期一 

执行通道2打开成功！

------------------------------------


Log Entry : 09:46:52 2018年5月7日,星期一 

执行通道3打开！

------------------------------------


Log Entry : 09:46:54 2018年5月7日,星期一 

执行通道3打开成功！

------------------------------------


Log Entry : 09:46:55 2018年5月7日,星期一 

执行通道4打开！

------------------------------------


Log Entry : 09:46:57 2018年5月7日,星期一 

执行通道4打开成功！

------------------------------------


Log Entry : 09:47:05 2018年5月7日,星期一 

执行溶解氧多次测量指令！

------------------------------------


Log Entry : 09:47:07 2018年5月7日,星期一 

执行溶解氧多次测量指令成功！

------------------------------------


Log Entry : 09:47:13 2018年5月7日,星期一 

执行CTD锚系模式指令！

------------------------------------


Log Entry : 09:47:15 2018年5月7日,星期一 

CTD锚系模式执行成功！

------------------------------------


Log Entry : 15:29:52 2018年5月7日,星期一 

执行通道4关闭！

------------------------------------


Log Entry : 15:29:55 2018年5月7日,星期一 

执行通道4关闭成功！

------------------------------------


Log Entry : 15:29:57 2018年5月7日,星期一 

执行通道3关闭！

------------------------------------


Log Entry : 15:29:59 2018年5月7日,星期一 

执行通道3关闭成功！

------------------------------------


Log Entry : 15:30:01 2018年5月7日,星期一 

执行通道2关闭！

------------------------------------


Log Entry : 15:30:04 2018年5月7日,星期一 

执行通道2关闭成功！

------------------------------------


Log Entry : 15:30:07 2018年5月7日,星期一 

执行通道1关闭！

------------------------------------


Log Entry : 15:30:11 2018年5月7日,星期一 

执行通道1关闭成功！

------------------------------------


Log Entry : 15:30:36 2018年5月7日,星期一 

摄像头关闭成功！

------------------------------------


Log Entry : 15:30:43 2018年5月7日,星期一 

低压舱执行通道2关闭！

------------------------------------


Log Entry : 15:30:46 2018年5月7日,星期一 

低压舱执行通道2关闭成功！

------------------------------------


Log Entry : 09:40:49 2018年5月9日,星期三 

低压舱执行通道2打开！

------------------------------------


Log Entry : 09:40:52 2018年5月9日,星期三 

低压舱执行通道2打开成功！

------------------------------------


Log Entry : 09:41:07 2018年5月9日,星期三 

摄像头打开成功！

------------------------------------


Log Entry : 09:41:59 2018年5月9日,星期三 

执行通道1打开！

------------------------------------


Log Entry : 09:42:02 2018年5月9日,星期三 

执行通道1打开成功！

------------------------------------


Log Entry : 09:42:03 2018年5月9日,星期三 

执行通道2打开！

------------------------------------


Log Entry : 09:42:06 2018年5月9日,星期三 

执行通道2打开成功！

------------------------------------


Log Entry : 09:42:07 2018年5月9日,星期三 

执行通道3打开！

------------------------------------


Log Entry : 09:42:09 2018年5月9日,星期三 

执行通道3打开成功！

------------------------------------


Log Entry : 09:42:11 2018年5月9日,星期三 

执行通道4打开！

------------------------------------


Log Entry : 09:42:13 2018年5月9日,星期三 

执行通道4打开成功！

------------------------------------


Log Entry : 09:42:19 2018年5月9日,星期三 

执行溶解氧多次测量指令！

------------------------------------


Log Entry : 09:42:21 2018年5月9日,星期三 

执行溶解氧多次测量指令成功！

------------------------------------


Log Entry : 09:42:25 2018年5月9日,星期三 

执行CTD锚系模式指令！

------------------------------------


Log Entry : 09:42:27 2018年5月9日,星期三 

CTD锚系模式执行成功！

------------------------------------


Log Entry : 11:36:42 2018年5月9日,星期三 

执行通道1关闭！

------------------------------------


Log Entry : 11:36:44 2018年5月9日,星期三 

执行通道1关闭成功！

------------------------------------


Log Entry : 11:36:46 2018年5月9日,星期三 

执行通道2关闭！

------------------------------------


Log Entry : 11:36:48 2018年5月9日,星期三 

执行通道2关闭成功！

------------------------------------


Log Entry : 11:36:49 2018年5月9日,星期三 

执行通道3关闭！

------------------------------------


Log Entry : 11:36:51 2018年5月9日,星期三 

执行通道3关闭成功！

------------------------------------


Log Entry : 11:36:53 2018年5月9日,星期三 

执行通道4关闭！

------------------------------------


Log Entry : 11:36:55 2018年5月9日,星期三 

执行通道4关闭成功！

------------------------------------


Log Entry : 11:38:30 2018年5月9日,星期三 

执行通道1打开！

------------------------------------


Log Entry : 11:38:33 2018年5月9日,星期三 

执行通道1打开成功！

------------------------------------


Log Entry : 11:38:49 2018年5月9日,星期三 

执行溶解氧多次测量指令！

------------------------------------


Log Entry : 11:38:51 2018年5月9日,星期三 

执行溶解氧多次测量指令成功！

------------------------------------


Log Entry : 11:41:05 2018年5月9日,星期三 

执行溶解氧存储芯片擦除指令！

------------------------------------


Log Entry : 11:41:07 2018年5月9日,星期三 

执行溶解氧存储芯片擦除指令成功！

------------------------------------


Log Entry : 11:41:12 2018年5月9日,星期三 

执行溶解氧存储芯片擦除指令！

------------------------------------


Log Entry : 11:41:14 2018年5月9日,星期三 

执行溶解氧存储芯片擦除指令成功！

------------------------------------


Log Entry : 11:41:15 2018年5月9日,星期三 

执行校准溶解氧时钟指令！

------------------------------------


Log Entry : 11:41:17 2018年5月9日,星期三 

执行校准溶解氧时钟指令成功！

------------------------------------


Log Entry : 11:41:20 2018年5月9日,星期三 

执行设置溶解氧时间间隔：0005

------------------------------------


Log Entry : 11:41:23 2018年5月9日,星期三 

执行设置溶解氧时间间隔失败！

------------------------------------


Log Entry : 11:43:36 2018年5月9日,星期三 

摄像头关闭成功！

------------------------------------


Log Entry : 11:53:14 2018年5月9日,星期三 

执行通道1打开！

------------------------------------


Log Entry : 11:53:17 2018年5月9日,星期三 

执行通道1打开成功！

------------------------------------


Log Entry : 11:53:29 2018年5月9日,星期三 

执行溶解氧多次测量指令！

------------------------------------


Log Entry : 11:53:31 2018年5月9日,星期三 

执行溶解氧多次测量指令成功！

------------------------------------


Log Entry : 11:55:06 2018年5月9日,星期三 

执行通道3打开！

------------------------------------


Log Entry : 11:55:08 2018年5月9日,星期三 

执行通道3打开成功！

------------------------------------


Log Entry : 11:55:09 2018年5月9日,星期三 

执行通道4打开！

------------------------------------


Log Entry : 11:55:11 2018年5月9日,星期三 

执行通道4打开成功！

------------------------------------


Log Entry : 11:55:37 2018年5月9日,星期三 

执行CTD锚系模式指令！

------------------------------------


Log Entry : 11:55:38 2018年5月9日,星期三 

CTD锚系模式执行成功！

------------------------------------


Log Entry : 11:58:01 2018年5月9日,星期三 

低压舱执行通道2打开！

------------------------------------


Log Entry : 11:58:02 2018年5月9日,星期三 

低压舱执行通道2打开成功！

------------------------------------


Log Entry : 12:06:00 2018年5月9日,星期三 

执行通道2打开！

------------------------------------


Log Entry : 12:06:02 2018年5月9日,星期三 

执行通道2打开成功！

------------------------------------


Log Entry : 12:06:10 2018年5月9日,星期三 

摄像头打开成功！

------------------------------------


Log Entry : 13:39:52 2018年5月9日,星期三 

执行通道1关闭！

------------------------------------


Log Entry : 13:39:55 2018年5月9日,星期三 

执行通道1关闭成功！

------------------------------------


Log Entry : 13:39:55 2018年5月9日,星期三 

执行通道2关闭！

------------------------------------


Log Entry : 13:39:57 2018年5月9日,星期三 

执行通道2关闭成功！

------------------------------------


Log Entry : 13:39:57 2018年5月9日,星期三 

执行通道3关闭！

------------------------------------


Log Entry : 13:39:59 2018年5月9日,星期三 

执行通道3关闭成功！

------------------------------------


Log Entry : 13:39:59 2018年5月9日,星期三 

执行通道4关闭！

------------------------------------


Log Entry : 13:40:01 2018年5月9日,星期三 

执行通道4关闭成功！

------------------------------------


Log Entry : 13:40:07 2018年5月9日,星期三 

低压舱执行通道2关闭！

------------------------------------


Log Entry : 13:40:09 2018年5月9日,星期三 

低压舱执行通道2关闭成功！

------------------------------------


Log Entry : 13:54:40 2018年5月9日,星期三 

低压舱执行通道2打开！

------------------------------------


Log Entry : 13:54:42 2018年5月9日,星期三 

低压舱执行通道2打开成功！

------------------------------------


Log Entry : 13:55:30 2018年5月9日,星期三 

执行通道1打开！

------------------------------------


Log Entry : 13:55:33 2018年5月9日,星期三 

执行通道1打开成功！

------------------------------------


Log Entry : 13:55:34 2018年5月9日,星期三 

执行通道2打开！

------------------------------------


Log Entry : 13:55:36 2018年5月9日,星期三 

执行通道2打开成功！

------------------------------------


Log Entry : 13:55:36 2018年5月9日,星期三 

执行通道3打开！

------------------------------------


Log Entry : 13:55:38 2018年5月9日,星期三 

执行通道3打开成功！

------------------------------------


Log Entry : 13:55:38 2018年5月9日,星期三 

执行通道4打开！

------------------------------------


Log Entry : 13:55:40 2018年5月9日,星期三 

执行通道4打开成功！

------------------------------------


Log Entry : 13:55:40 2018年5月9日,星期三 

执行通道5打开！

------------------------------------


Log Entry : 13:55:42 2018年5月9日,星期三 

执行通道5打开成功！

------------------------------------


Log Entry : 13:55:43 2018年5月9日,星期三 

执行通道5关闭！

------------------------------------


Log Entry : 13:55:46 2018年5月9日,星期三 

执行通道5关闭成功！

------------------------------------


Log Entry : 13:55:56 2018年5月9日,星期三 

执行溶解氧多次测量指令！

------------------------------------


Log Entry : 13:55:57 2018年5月9日,星期三 

执行溶解氧多次测量指令成功！

------------------------------------


Log Entry : 13:56:00 2018年5月9日,星期三 

执行CTD锚系模式指令！

------------------------------------


Log Entry : 13:56:02 2018年5月9日,星期三 

CTD锚系模式执行成功！

------------------------------------


Log Entry : 14:30:01 2018年5月9日,星期三 

执行通道4关闭！

------------------------------------


Log Entry : 14:30:04 2018年5月9日,星期三 

执行通道4关闭成功！

------------------------------------


Log Entry : 14:30:05 2018年5月9日,星期三 

执行通道3关闭！

------------------------------------


Log Entry : 14:30:08 2018年5月9日,星期三 

执行通道3关闭成功！

------------------------------------


Log Entry : 14:30:10 2018年5月9日,星期三 

执行通道2关闭！

------------------------------------


Log Entry : 14:30:13 2018年5月9日,星期三 

执行通道2关闭成功！

------------------------------------


Log Entry : 14:30:14 2018年5月9日,星期三 

执行通道1关闭！

------------------------------------


Log Entry : 14:30:16 2018年5月9日,星期三 

执行通道1关闭成功！

------------------------------------


Log Entry : 14:30:45 2018年5月9日,星期三 

低压舱执行通道2关闭！

------------------------------------


Log Entry : 14:30:48 2018年5月9日,星期三 

低压舱执行通道2关闭成功！

------------------------------------


Log Entry : 14:31:05 2018年5月9日,星期三 

摄像头关闭成功！

------------------------------------


Log Entry : 16:53:19 2018年5月9日,星期三 

低压舱执行通道2打开！

------------------------------------


Log Entry : 16:53:22 2018年5月9日,星期三 

低压舱执行通道2打开成功！

------------------------------------


Log Entry : 16:53:32 2018年5月9日,星期三 

摄像头打开成功！

------------------------------------


Log Entry : 16:54:36 2018年5月9日,星期三 

执行通道1打开！

------------------------------------


Log Entry : 16:54:42 2018年5月9日,星期三 

执行通道1打开成功！

------------------------------------


Log Entry : 16:54:43 2018年5月9日,星期三 

执行通道2打开！

------------------------------------


Log Entry : 16:54:47 2018年5月9日,星期三 

执行通道2打开成功！

------------------------------------


Log Entry : 16:54:47 2018年5月9日,星期三 

执行通道3打开！

------------------------------------


Log Entry : 16:54:49 2018年5月9日,星期三 

执行通道3打开成功！

------------------------------------


Log Entry : 16:54:50 2018年5月9日,星期三 

执行通道4打开！

------------------------------------


Log Entry : 16:54:52 2018年5月9日,星期三 

执行通道4打开成功！

------------------------------------


Log Entry : 16:54:57 2018年5月9日,星期三 

执行溶解氧多次测量指令！

------------------------------------


Log Entry : 16:54:58 2018年5月9日,星期三 

执行溶解氧多次测量指令成功！

------------------------------------


Log Entry : 16:55:01 2018年5月9日,星期三 

执行CTD锚系模式指令！

------------------------------------


Log Entry : 16:55:02 2018年5月9日,星期三 

CTD锚系模式执行成功！

------------------------------------


Log Entry : 17:36:46 2018年5月9日,星期三 

执行通道2关闭！

------------------------------------


Log Entry : 17:36:48 2018年5月9日,星期三 

执行通道2关闭成功！

------------------------------------


Log Entry : 17:36:50 2018年5月9日,星期三 

执行通道1关闭！

------------------------------------


Log Entry : 17:36:52 2018年5月9日,星期三 

执行通道1关闭成功！

------------------------------------


Log Entry : 17:36:53 2018年5月9日,星期三 

执行通道3关闭！

------------------------------------


Log Entry : 17:36:56 2018年5月9日,星期三 

执行通道3关闭成功！

------------------------------------


Log Entry : 17:36:57 2018年5月9日,星期三 

执行通道4关闭！

------------------------------------


Log Entry : 17:37:00 2018年5月9日,星期三 

执行通道4关闭成功！

------------------------------------


Log Entry : 17:37:04 2018年5月9日,星期三 

低压舱执行通道2关闭！

------------------------------------


Log Entry : 17:37:06 2018年5月9日,星期三 

低压舱执行通道2关闭成功！

------------------------------------


Log Entry : 14:32:23 2018年5月11日,星期五 

摄像头打开成功！

------------------------------------


Log Entry : 14:32:25 2018年5月11日,星期五 

低压舱执行通道2打开！

------------------------------------


Log Entry : 14:32:27 2018年5月11日,星期五 

低压舱执行通道2打开成功！

------------------------------------


Log Entry : 14:35:40 2018年5月11日,星期五 

低压舱执行通道2打开！

------------------------------------


Log Entry : 14:35:42 2018年5月11日,星期五 

低压舱执行通道2打开成功！

------------------------------------


Log Entry : 14:36:04 2018年5月11日,星期五 

执行通道1打开！

------------------------------------


Log Entry : 14:36:11 2018年5月11日,星期五 

执行通道1打开成功！

------------------------------------


Log Entry : 14:36:12 2018年5月11日,星期五 

执行通道2打开！

------------------------------------


Log Entry : 14:36:14 2018年5月11日,星期五 

执行通道2打开成功！

------------------------------------


Log Entry : 14:36:15 2018年5月11日,星期五 

执行通道3打开！

------------------------------------


Log Entry : 14:36:17 2018年5月11日,星期五 

执行通道3打开成功！

------------------------------------


Log Entry : 14:36:17 2018年5月11日,星期五 

执行通道4打开！

------------------------------------


Log Entry : 14:36:19 2018年5月11日,星期五 

执行通道4打开成功！

------------------------------------


Log Entry : 14:36:28 2018年5月11日,星期五 

执行溶解氧多次测量指令！

------------------------------------


Log Entry : 14:36:30 2018年5月11日,星期五 

执行溶解氧多次测量指令成功！

------------------------------------


Log Entry : 14:36:33 2018年5月11日,星期五 

执行CTD锚系模式指令！

------------------------------------


Log Entry : 14:36:34 2018年5月11日,星期五 

CTD锚系模式执行成功！

------------------------------------


Log Entry : 16:59:15 2018年5月11日,星期五 

摄像头关闭成功！

------------------------------------


Log Entry : 16:59:21 2018年5月11日,星期五 

执行通道1关闭！

------------------------------------


Log Entry : 16:59:23 2018年5月11日,星期五 

执行通道1关闭成功！

------------------------------------


Log Entry : 16:59:24 2018年5月11日,星期五 

执行通道2关闭！

------------------------------------


Log Entry : 16:59:26 2018年5月11日,星期五 

执行通道2关闭成功！

------------------------------------


Log Entry : 16:59:27 2018年5月11日,星期五 

执行通道3关闭！

------------------------------------


Log Entry : 16:59:29 2018年5月11日,星期五 

执行通道3关闭成功！

------------------------------------


Log Entry : 16:59:29 2018年5月11日,星期五 

执行通道4关闭！

------------------------------------


Log Entry : 16:59:31 2018年5月11日,星期五 

执行通道4关闭成功！

------------------------------------


Log Entry : 16:59:43 2018年5月11日,星期五 

低压舱执行通道2关闭！

------------------------------------


Log Entry : 16:59:47 2018年5月11日,星期五 

低压舱执行通道2关闭成功！

------------------------------------


Log Entry : 11:17:05 2018年5月18日 

执行多参数改变采样间隔指令！

------------------------------------


Log Entry : 11:17:42 2018年5月18日 

执行多参数改变采样间隔指令！

------------------------------------


Log Entry : 11:17:58 2018年5月18日 

多参数改变采样间隔指令执行失败！

------------------------------------


Log Entry : 11:17:59 2018年5月18日 

执行多参数改变采样间隔指令！

------------------------------------


Log Entry : 11:18:16 2018年5月18日 

多参数改变采样间隔指令执行失败！

------------------------------------


Log Entry : 13:33:43 2018年5月18日 

低压舱执行通道2打开！

------------------------------------


Log Entry : 13:33:45 2018年5月18日 

低压舱执行通道2打开成功！

------------------------------------


Log Entry : 13:34:49 2018年5月18日 

执行通道5打开！

------------------------------------


Log Entry : 13:35:11 2018年5月18日 

执行通道5打开失败！

------------------------------------


Log Entry : 13:35:14 2018年5月18日 

执行通道5打开！

------------------------------------


Log Entry : 13:35:17 2018年5月18日 

执行通道5打开成功！

------------------------------------


Log Entry : 13:37:02 2018年5月18日 

执行多参数改变采样间隔指令！

------------------------------------


Log Entry : 13:37:12 2018年5月18日 

多参数改变采样间隔指令执行失败！

------------------------------------


Log Entry : 13:48:36 2018年5月18日 

执行多参数改变采样间隔指令！

------------------------------------


Log Entry : 13:51:50 2018年5月18日 

执行多参数改变采样间隔指令！

------------------------------------


Log Entry : 13:52:01 2018年5月18日 

多参数改变采样间隔指令执行失败！

------------------------------------


Log Entry : 13:59:08 2018年5月18日 

执行多参数改变采样间隔指令！

------------------------------------


Log Entry : 14:00:37 2018年5月18日 

多参数改变采样间隔指令执行失败！

------------------------------------


Log Entry : 14:01:03 2018年5月18日 

执行溶解氧单次测量指令！

------------------------------------


Log Entry : 14:01:14 2018年5月18日 

溶解氧单次测量执行失败！

------------------------------------


Log Entry : 14:01:53 2018年5月18日 

执行溶解氧多次测量指令！

------------------------------------


Log Entry : 14:02:07 2018年5月18日 

执行溶解氧多次测量指令失败！

------------------------------------


Log Entry : 14:02:19 2018年5月18日 

执行通道1打开！

------------------------------------


Log Entry : 14:02:44 2018年5月18日 

执行通道1打开成功！

------------------------------------


Log Entry : 14:02:50 2018年5月18日 

执行溶解氧多次测量指令！

------------------------------------


Log Entry : 14:03:00 2018年5月18日 

执行溶解氧多次测量指令失败！

------------------------------------


Log Entry : 14:04:11 2018年5月18日 

执行溶解氧多次测量指令！

------------------------------------


Log Entry : 14:04:21 2018年5月18日 

执行溶解氧多次测量指令失败！

------------------------------------


Log Entry : 14:04:40 2018年5月18日 

执行溶解氧多次测量指令！

------------------------------------


Log Entry : 14:04:49 2018年5月18日 

执行溶解氧多次测量指令失败！

------------------------------------


Log Entry : 14:04:54 2018年5月18日 

执行溶解氧单次测量指令！

------------------------------------


Log Entry : 14:05:03 2018年5月18日 

溶解氧单次测量执行失败！

------------------------------------


Log Entry : 14:05:17 2018年5月18日 

低压舱执行通道2打开！

------------------------------------


Log Entry : 14:05:18 2018年5月18日 

低压舱执行通道2打开成功！

------------------------------------


Log Entry : 14:05:19 2018年5月18日 

低压舱执行通道2关闭！

------------------------------------


Log Entry : 14:05:21 2018年5月18日 

低压舱执行通道2关闭成功！

------------------------------------


Log Entry : 14:05:22 2018年5月18日 

低压舱执行通道2打开！

------------------------------------


Log Entry : 14:05:24 2018年5月18日 

低压舱执行通道2打开成功！

------------------------------------


Log Entry : 14:06:14 2018年5月18日 

执行通道1打开！

------------------------------------


Log Entry : 14:06:16 2018年5月18日 

执行通道1打开成功！

------------------------------------


Log Entry : 14:06:21 2018年5月18日 

执行溶解氧多次测量指令！

------------------------------------


Log Entry : 14:06:36 2018年5月18日 

执行溶解氧多次测量指令失败！

------------------------------------


Log Entry : 14:06:43 2018年5月18日 

执行通道1关闭！

------------------------------------


Log Entry : 14:06:46 2018年5月18日 

执行通道1关闭成功！

------------------------------------


Log Entry : 14:07:23 2018年5月18日 

执行校时指令成功！

------------------------------------


Log Entry : 14:07:46 2018年5月18日 

执行通道1打开！

------------------------------------


Log Entry : 14:07:48 2018年5月18日 

执行通道1打开成功！

------------------------------------


Log Entry : 14:07:52 2018年5月18日 

执行溶解氧多次测量指令！

------------------------------------


Log Entry : 14:08:02 2018年5月18日 

执行溶解氧多次测量指令失败！

------------------------------------


Log Entry : 14:08:09 2018年5月18日 

执行通道3打开！

------------------------------------


Log Entry : 14:08:11 2018年5月18日 

执行通道3打开成功！

------------------------------------


Log Entry : 14:20:15 2018年5月18日 

执行溶解氧单次测量指令！

------------------------------------


Log Entry : 14:20:18 2018年5月18日 

溶解氧单次测量执行成功！

------------------------------------


Log Entry : 14:20:20 2018年5月18日 

执行溶解氧多次测量指令！

------------------------------------


Log Entry : 14:20:21 2018年5月18日 

执行溶解氧多次测量指令成功！

------------------------------------


Log Entry : 14:20:26 2018年5月18日 

执行多参数改变采样间隔指令！

------------------------------------


Log Entry : 14:20:28 2018年5月18日 

多参数改变采样间隔指令执行成功！

------------------------------------


Log Entry : 14:20:57 2018年5月18日 

执行多参数改变采样间隔指令！

------------------------------------


Log Entry : 14:21:01 2018年5月18日 

多参数改变采样间隔指令执行成功！

------------------------------------


Log Entry : 14:22:22 2018年5月18日 

执行通道4打开！

------------------------------------


Log Entry : 14:22:24 2018年5月18日 

执行通道4打开成功！

------------------------------------


Log Entry : 14:22:28 2018年5月18日 

执行CTD锚系模式指令！

------------------------------------


Log Entry : 14:22:30 2018年5月18日 

CTD锚系模式执行成功！

------------------------------------


Log Entry : 14:22:53 2018年5月18日 

执行多参数改变采样间隔指令！

------------------------------------


Log Entry : 14:22:55 2018年5月18日 

多参数改变采样间隔指令执行成功！

------------------------------------


Log Entry : 16:35:42 2018年5月18日 

执行多参数改变采样间隔指令！

------------------------------------


Log Entry : 16:35:57 2018年5月18日 

多参数改变采样间隔指令执行失败！

------------------------------------


Log Entry : 16:36:01 2018年5月18日 

执行多参数改变采样间隔指令！

------------------------------------


Log Entry : 16:36:11 2018年5月18日 

多参数改变采样间隔指令执行失败！

------------------------------------


Log Entry : 16:36:24 2018年5月18日 

执行通道1打开！

------------------------------------


Log Entry : 16:36:34 2018年5月18日 

执行通道1打开失败！

------------------------------------


Log Entry : 16:37:04 2018年5月18日 

执行通道1打开！

------------------------------------


Log Entry : 16:37:14 2018年5月18日 

执行通道1打开失败！

------------------------------------


Log Entry : 16:37:21 2018年5月18日 

执行通道1打开！

------------------------------------


Log Entry : 16:37:32 2018年5月18日 

执行通道1打开失败！

------------------------------------


Log Entry : 16:38:21 2018年5月18日 

执行通道1打开！

------------------------------------


Log Entry : 16:38:33 2018年5月18日 

执行通道1打开失败！

------------------------------------


Log Entry : 16:38:36 2018年5月18日 

执行通道1打开！

------------------------------------


Log Entry : 16:38:46 2018年5月18日 

执行通道1打开失败！

------------------------------------


Log Entry : 16:39:51 2018年5月18日 

执行通道1打开！

------------------------------------


Log Entry : 16:39:54 2018年5月18日 

执行通道1打开成功！

------------------------------------


Log Entry : 16:40:10 2018年5月18日 

执行多参数改变采样间隔指令！

------------------------------------


Log Entry : 16:40:12 2018年5月18日 

多参数改变采样间隔指令执行成功！

------------------------------------


Log Entry : 16:41:45 2018年5月18日 

执行溶解氧多次测量指令！

------------------------------------


Log Entry : 16:41:48 2018年5月18日 

执行溶解氧多次测量指令成功！

------------------------------------


Log Entry : 16:42:25 2018年5月18日 

执行通道2打开！

------------------------------------


Log Entry : 16:42:27 2018年5月18日 

执行通道2打开成功！

------------------------------------


Log Entry : 16:42:28 2018年5月18日 

执行通道3打开！

------------------------------------


Log Entry : 16:42:30 2018年5月18日 

执行通道3打开成功！

------------------------------------


Log Entry : 16:42:31 2018年5月18日 

执行通道4打开！

------------------------------------


Log Entry : 16:42:33 2018年5月18日 

执行通道4打开成功！

------------------------------------


Log Entry : 16:42:35 2018年5月18日 

执行通道5打开！

------------------------------------


Log Entry : 16:42:37 2018年5月18日 

执行通道5打开成功！

------------------------------------


Log Entry : 16:42:46 2018年5月18日 

执行CTD锚系模式指令！

------------------------------------


Log Entry : 16:42:48 2018年5月18日 

CTD锚系模式执行成功！

------------------------------------


Log Entry : 16:51:55 2018年5月18日 

执行通道1打开！

------------------------------------


Log Entry : 16:51:58 2018年5月18日 

执行通道1打开成功！

------------------------------------


Log Entry : 16:51:59 2018年5月18日 

执行通道1关闭！

------------------------------------


Log Entry : 16:52:02 2018年5月18日 

执行通道1关闭成功！

------------------------------------


Log Entry : 16:53:30 2018年5月18日 

执行通道1打开！

------------------------------------


Log Entry : 16:53:32 2018年5月18日 

执行通道1打开成功！

------------------------------------


Log Entry : 16:53:35 2018年5月18日 

执行溶解氧多次测量指令！

------------------------------------


Log Entry : 16:53:37 2018年5月18日 

执行溶解氧多次测量指令成功！

------------------------------------


Log Entry : 16:54:05 2018年5月18日 

执行通道2打开！

------------------------------------


Log Entry : 16:54:07 2018年5月18日 

执行通道2打开成功！

------------------------------------


Log Entry : 16:54:08 2018年5月18日 

执行通道3打开！

------------------------------------


Log Entry : 16:54:10 2018年5月18日 

执行通道3打开成功！

------------------------------------


Log Entry : 16:54:10 2018年5月18日 

执行通道4打开！

------------------------------------


Log Entry : 16:54:12 2018年5月18日 

执行通道4打开成功！

------------------------------------


Log Entry : 16:54:13 2018年5月18日 

执行通道5打开！

------------------------------------


Log Entry : 16:54:14 2018年5月18日 

执行通道5打开成功！

------------------------------------


Log Entry : 16:56:13 2018年5月18日 

低压舱执行通道2打开！

------------------------------------


Log Entry : 16:56:15 2018年5月18日 

低压舱执行通道2打开成功！

------------------------------------


Log Entry : 10:14:37 2018年5月21日 

低压舱执行通道1打开！

------------------------------------


Log Entry : 10:14:38 2018年5月21日 

低压舱执行通道1打开成功！

------------------------------------


Log Entry : 10:14:43 2018年5月21日 

执行高压舱通道2打开！

------------------------------------


Log Entry : 10:14:44 2018年5月21日 

执行高压舱通道2打开成功！

------------------------------------


Log Entry : 10:14:47 2018年5月21日 

低压舱执行通道2打开！

------------------------------------


Log Entry : 10:14:49 2018年5月21日 

低压舱执行通道2打开成功！

------------------------------------


Log Entry : 10:16:29 2018年5月21日 

执行通道1打开！

------------------------------------


Log Entry : 10:16:31 2018年5月21日 

执行通道1打开成功！

------------------------------------


Log Entry : 10:16:32 2018年5月21日 

执行通道2打开！

------------------------------------


Log Entry : 10:16:33 2018年5月21日 

执行通道2打开成功！

------------------------------------


Log Entry : 10:16:34 2018年5月21日 

执行通道3打开！

------------------------------------


Log Entry : 10:16:36 2018年5月21日 

执行通道3打开成功！

------------------------------------


Log Entry : 10:16:36 2018年5月21日 

执行通道4打开！

------------------------------------


Log Entry : 10:16:38 2018年5月21日 

执行通道4打开成功！

------------------------------------


Log Entry : 10:16:39 2018年5月21日 

执行通道5打开！

------------------------------------


Log Entry : 10:16:41 2018年5月21日 

执行通道5打开成功！

------------------------------------


Log Entry : 10:16:44 2018年5月21日 

执行溶解氧多次测量指令！

------------------------------------


Log Entry : 10:16:46 2018年5月21日 

执行溶解氧多次测量指令成功！

------------------------------------


Log Entry : 10:16:55 2018年5月21日 

执行CTD锚系模式指令！

------------------------------------


Log Entry : 10:16:57 2018年5月21日 

CTD锚系模式执行成功！

------------------------------------


Log Entry : 10:19:13 2018年5月21日 

执行多参数改变采样间隔指令！

------------------------------------


Log Entry : 10:19:15 2018年5月21日 

多参数改变采样间隔指令执行成功！

------------------------------------


Log Entry : 16:47:00 2018年5月21日 

执行高压舱通道2关闭！

------------------------------------


Log Entry : 16:47:01 2018年5月21日 

执行高压舱通道2关闭成功！

------------------------------------


Log Entry : 16:47:48 2018年5月21日 

执行通道1关闭！

------------------------------------


Log Entry : 16:47:50 2018年5月21日 

执行通道1关闭成功！

------------------------------------


Log Entry : 16:47:50 2018年5月21日 

执行通道2关闭！

------------------------------------


Log Entry : 16:47:52 2018年5月21日 

执行通道2关闭成功！

------------------------------------


Log Entry : 16:47:52 2018年5月21日 

执行通道3关闭！

------------------------------------


Log Entry : 16:47:54 2018年5月21日 

执行通道3关闭成功！

------------------------------------


Log Entry : 16:47:55 2018年5月21日 

执行通道4关闭！

------------------------------------


Log Entry : 16:47:56 2018年5月21日 

执行通道4关闭成功！

------------------------------------


Log Entry : 16:47:57 2018年5月21日 

执行通道5关闭！

------------------------------------


Log Entry : 16:47:58 2018年5月21日 

执行通道5关闭成功！

------------------------------------


Log Entry : 16:48:07 2018年5月21日 

摄像头关闭成功！

------------------------------------


Log Entry : 16:48:17 2018年5月21日 

低压舱执行通道1关闭！

------------------------------------


Log Entry : 16:48:18 2018年5月21日 

低压舱执行通道1关闭成功！

------------------------------------


Log Entry : 16:48:18 2018年5月21日 

低压舱执行通道2关闭！

------------------------------------


Log Entry : 16:48:20 2018年5月21日 

低压舱执行通道2关闭成功！

------------------------------------


Log Entry : 11:22:53 2018年5月22日 

摄像头打开成功！

------------------------------------


Log Entry : 11:23:28 2018年5月22日 

低压舱执行通道2打开！

------------------------------------


Log Entry : 11:23:31 2018年5月22日 

低压舱执行通道2打开成功！

------------------------------------


Log Entry : 11:23:44 2018年5月22日 

摄像头打开成功！

------------------------------------


Log Entry : 11:24:48 2018年5月22日 

执行通道1打开！

------------------------------------


Log Entry : 11:24:50 2018年5月22日 

执行通道1打开成功！

------------------------------------


Log Entry : 11:24:53 2018年5月22日 

执行通道2打开！

------------------------------------


Log Entry : 11:24:55 2018年5月22日 

执行通道2打开成功！

------------------------------------


Log Entry : 11:24:56 2018年5月22日 

执行通道3打开！

------------------------------------


Log Entry : 11:24:58 2018年5月22日 

执行通道3打开成功！

------------------------------------


Log Entry : 11:24:59 2018年5月22日 

执行通道4打开！

------------------------------------


Log Entry : 11:25:01 2018年5月22日 

执行通道4打开成功！

------------------------------------


Log Entry : 11:25:02 2018年5月22日 

执行通道5打开！

------------------------------------


Log Entry : 11:25:04 2018年5月22日 

执行通道5打开成功！

------------------------------------


Log Entry : 11:25:18 2018年5月22日 

执行多参数改变采样间隔指令！

------------------------------------


Log Entry : 11:25:20 2018年5月22日 

多参数改变采样间隔指令执行成功！

------------------------------------


Log Entry : 11:25:25 2018年5月22日 

执行CTD锚系模式指令！

------------------------------------


Log Entry : 11:25:27 2018年5月22日 

CTD锚系模式执行成功！

------------------------------------


Log Entry : 11:25:27 2018年5月22日 

执行CTD锚系模式指令！

------------------------------------


Log Entry : 11:25:29 2018年5月22日 

CTD锚系模式执行成功！

------------------------------------


Log Entry : 11:25:30 2018年5月22日 

执行CTD锚系模式指令！

------------------------------------


Log Entry : 11:25:31 2018年5月22日 

CTD锚系模式执行成功！

------------------------------------


Log Entry : 11:25:34 2018年5月22日 

执行溶解氧多次测量指令！

------------------------------------


Log Entry : 11:25:36 2018年5月22日 

执行溶解氧多次测量指令成功！

------------------------------------


Log Entry : 14:29:37 2018年5月22日 

执行通道5关闭！

------------------------------------


Log Entry : 14:29:40 2018年5月22日 

执行通道5关闭成功！

------------------------------------


Log Entry : 14:31:17 2018年5月22日 

执行通道5打开！

------------------------------------


Log Entry : 14:31:19 2018年5月22日 

执行通道5打开成功！

------------------------------------


Log Entry : 14:31:23 2018年5月22日 

执行多参数改变采样间隔指令！

------------------------------------


Log Entry : 14:31:25 2018年5月22日 

多参数改变采样间隔指令执行成功！

------------------------------------


Log Entry : 16:06:02 2018年5月22日 

摄像头关闭成功！

------------------------------------


Log Entry : 16:06:06 2018年5月22日 

执行通道5关闭！

------------------------------------


Log Entry : 16:06:08 2018年5月22日 

执行通道5关闭成功！

------------------------------------


Log Entry : 16:06:09 2018年5月22日 

执行通道2关闭！

------------------------------------


Log Entry : 16:06:11 2018年5月22日 

执行通道2关闭成功！

------------------------------------


Log Entry : 16:06:13 2018年5月22日 

执行通道5打开！

------------------------------------


Log Entry : 16:06:15 2018年5月22日 

执行通道5打开成功！

------------------------------------


Log Entry : 16:06:19 2018年5月22日 

执行多参数改变采样间隔指令！

------------------------------------


Log Entry : 16:06:21 2018年5月22日 

多参数改变采样间隔指令执行成功！

------------------------------------


Log Entry : 16:07:32 2018年5月22日 

摄像头打开成功！

------------------------------------


Log Entry : 16:07:37 2018年5月22日 

摄像头关闭成功！

------------------------------------


Log Entry : 16:07:40 2018年5月22日 

摄像头打开成功！

------------------------------------


Log Entry : 16:07:43 2018年5月22日 

执行通道2打开！

------------------------------------


Log Entry : 16:07:45 2018年5月22日 

执行通道2打开成功！

------------------------------------


Log Entry : 17:50:27 2018年5月22日 

执行通道1关闭！

------------------------------------


Log Entry : 17:50:29 2018年5月22日 

执行通道1关闭成功！

------------------------------------


Log Entry : 17:50:29 2018年5月22日 

执行通道2关闭！

------------------------------------


Log Entry : 17:50:31 2018年5月22日 

执行通道2关闭成功！

------------------------------------


Log Entry : 17:50:32 2018年5月22日 

执行通道3关闭！

------------------------------------


Log Entry : 17:50:34 2018年5月22日 

执行通道3关闭成功！

------------------------------------


Log Entry : 17:50:34 2018年5月22日 

执行通道4关闭！

------------------------------------


Log Entry : 17:50:36 2018年5月22日 

执行通道4关闭成功！

------------------------------------


Log Entry : 17:50:36 2018年5月22日 

执行通道5关闭！

------------------------------------


Log Entry : 17:50:38 2018年5月22日 

执行通道5关闭成功！

------------------------------------


Log Entry : 17:50:45 2018年5月22日 

低压舱执行通道2关闭！

------------------------------------


Log Entry : 17:50:47 2018年5月22日 

低压舱执行通道2关闭成功！

------------------------------------


Log Entry : 17:50:51 2018年5月22日 

摄像头关闭成功！

------------------------------------


Log Entry : 9:06:06 2018年5月23日 

摄像头打开成功！

------------------------------------


Log Entry : 9:06:10 2018年5月23日 

低压舱执行通道2打开！

------------------------------------


Log Entry : 9:06:12 2018年5月23日 

低压舱执行通道2打开成功！

------------------------------------


Log Entry : 9:06:14 2018年5月23日 

执行高压舱通道1打开！

------------------------------------


Log Entry : 9:06:16 2018年5月23日 

执行高压舱通道1打开成功！

------------------------------------


Log Entry : 9:07:04 2018年5月23日 

执行通道1打开！

------------------------------------


Log Entry : 9:07:07 2018年5月23日 

执行通道1打开成功！

------------------------------------


Log Entry : 9:07:10 2018年5月23日 

执行通道2打开！

------------------------------------


Log Entry : 9:07:12 2018年5月23日 

执行通道2打开成功！

------------------------------------


Log Entry : 9:07:14 2018年5月23日 

执行通道3打开！

------------------------------------


Log Entry : 9:07:16 2018年5月23日 

执行通道3打开成功！

------------------------------------


Log Entry : 9:07:17 2018年5月23日 

执行通道4打开！

------------------------------------


Log Entry : 9:07:19 2018年5月23日 

执行通道4打开成功！

------------------------------------


Log Entry : 9:07:20 2018年5月23日 

执行通道5打开！

------------------------------------


Log Entry : 9:07:22 2018年5月23日 

执行通道5打开成功！

------------------------------------


Log Entry : 9:07:32 2018年5月23日 

执行多参数改变采样间隔指令！

------------------------------------


Log Entry : 9:07:33 2018年5月23日 

多参数改变采样间隔指令执行成功！

------------------------------------


Log Entry : 9:07:38 2018年5月23日 

执行溶解氧存储芯片擦除指令！

------------------------------------


Log Entry : 9:07:40 2018年5月23日 

执行溶解氧存储芯片擦除指令成功！

------------------------------------


Log Entry : 9:07:40 2018年5月23日 

执行溶解氧多次测量指令！

------------------------------------


Log Entry : 9:07:42 2018年5月23日 

执行溶解氧多次测量指令成功！

------------------------------------


Log Entry : 9:07:45 2018年5月23日 

执行CTD锚系模式指令！

------------------------------------


Log Entry : 9:07:46 2018年5月23日 

CTD锚系模式执行成功！

------------------------------------


Log Entry : 13:38:54 2018年5月23日 

执行通道1打开！

------------------------------------


Log Entry : 13:38:56 2018年5月23日 

执行通道1打开成功！

------------------------------------


Log Entry : 13:38:57 2018年5月23日 

执行通道2打开！

------------------------------------


Log Entry : 13:38:59 2018年5月23日 

执行通道2打开成功！

------------------------------------


Log Entry : 13:38:59 2018年5月23日 

执行通道3打开！

------------------------------------


Log Entry : 13:39:01 2018年5月23日 

执行通道3打开成功！

------------------------------------


Log Entry : 13:39:02 2018年5月23日 

执行通道4打开！

------------------------------------


Log Entry : 13:39:04 2018年5月23日 

执行通道4打开成功！

------------------------------------


Log Entry : 13:39:04 2018年5月23日 

执行通道5打开！

------------------------------------


Log Entry : 13:39:06 2018年5月23日 

执行通道5打开成功！

------------------------------------


Log Entry : 13:39:10 2018年5月23日 

低压舱执行通道2打开！

------------------------------------


Log Entry : 13:39:11 2018年5月23日 

低压舱执行通道2打开成功！

------------------------------------


Log Entry : 13:39:12 2018年5月23日 

执行高压舱通道1打开！

------------------------------------


Log Entry : 13:39:15 2018年5月23日 

执行高压舱通道1打开成功！

------------------------------------


Log Entry : 13:39:16 2018年5月23日 

执行高压舱通道1关闭！

------------------------------------


Log Entry : 13:39:17 2018年5月23日 

执行高压舱通道1关闭成功！

------------------------------------


Log Entry : 15:37:19 2018年5月23日 

校时指令执行成功！

------------------------------------


Log Entry : 16:09:01 2018年5月23日 

低压舱执行通道2打开！

------------------------------------


Log Entry : 16:09:03 2018年5月23日 

低压舱执行通道2打开成功！

------------------------------------


Log Entry : 16:09:09 2018年5月23日 

摄像头关闭成功！

------------------------------------


Log Entry : 16:09:43 2018年5月23日 

执行通道1打开！

------------------------------------


Log Entry : 16:09:45 2018年5月23日 

执行通道1打开成功！

------------------------------------


Log Entry : 16:09:46 2018年5月23日 

执行通道2打开！

------------------------------------


Log Entry : 16:09:48 2018年5月23日 

执行通道2打开成功！

------------------------------------


Log Entry : 16:09:48 2018年5月23日 

执行通道3打开！

------------------------------------


Log Entry : 16:09:50 2018年5月23日 

执行通道3打开成功！

------------------------------------


Log Entry : 16:09:51 2018年5月23日 

执行通道4打开！

------------------------------------


Log Entry : 16:09:53 2018年5月23日 

执行通道4打开成功！

------------------------------------


Log Entry : 16:09:53 2018年5月23日 

执行通道5打开！

------------------------------------


Log Entry : 16:09:55 2018年5月23日 

执行通道5打开成功！

------------------------------------


Log Entry : 16:09:56 2018年5月23日 

执行通道5关闭！

------------------------------------


Log Entry : 16:09:58 2018年5月23日 

执行通道5关闭成功！

------------------------------------


Log Entry : 16:09:58 2018年5月23日 

执行通道4关闭！

------------------------------------


Log Entry : 16:10:00 2018年5月23日 

执行通道4关闭成功！

------------------------------------


Log Entry : 16:10:01 2018年5月23日 

执行通道3关闭！

------------------------------------


Log Entry : 16:10:03 2018年5月23日 

执行通道3关闭成功！

------------------------------------


Log Entry : 16:10:03 2018年5月23日 

执行通道2关闭！

------------------------------------


Log Entry : 16:10:05 2018年5月23日 

执行通道2关闭成功！

------------------------------------


Log Entry : 16:10:06 2018年5月23日 

执行通道1关闭！

------------------------------------


Log Entry : 16:10:08 2018年5月23日 

执行通道1关闭成功！

------------------------------------


Log Entry : 16:10:11 2018年5月23日 

低压舱执行通道2关闭！

------------------------------------


Log Entry : 16:10:13 2018年5月23日 

低压舱执行通道2关闭成功！

------------------------------------


Log Entry : 16:15:09 2018年5月23日 

低压舱执行通道2打开！

------------------------------------


Log Entry : 16:15:13 2018年5月23日 

低压舱执行通道2打开成功！

------------------------------------


Log Entry : 16:16:44 2018年5月23日 

执行通道1打开！

------------------------------------


Log Entry : 16:16:46 2018年5月23日 

执行通道1打开成功！

------------------------------------


Log Entry : 16:16:46 2018年5月23日 

执行通道2打开！

------------------------------------


Log Entry : 16:16:49 2018年5月23日 

执行通道2打开成功！

------------------------------------


Log Entry : 16:16:52 2018年5月23日 

执行溶解氧多次测量指令！

------------------------------------


Log Entry : 16:16:54 2018年5月23日 

执行溶解氧多次测量指令成功！

------------------------------------


Log Entry : 16:16:59 2018年5月23日 

执行通道3打开！

------------------------------------


Log Entry : 16:17:01 2018年5月23日 

执行通道3打开成功！

------------------------------------


Log Entry : 16:17:01 2018年5月23日 

执行通道4打开！

------------------------------------


Log Entry : 16:17:03 2018年5月23日 

执行通道4打开成功！

------------------------------------


Log Entry : 16:17:04 2018年5月23日 

执行通道5打开！

------------------------------------


Log Entry : 16:17:06 2018年5月23日 

执行通道5打开成功！

------------------------------------


Log Entry : 16:17:08 2018年5月23日 

执行多参数改变采样间隔指令！

------------------------------------


Log Entry : 16:17:09 2018年5月23日 

多参数改变采样间隔指令执行成功！

------------------------------------


Log Entry : 16:17:12 2018年5月23日 

执行CTD锚系模式指令！

------------------------------------


Log Entry : 16:17:13 2018年5月23日 

CTD锚系模式执行成功！

------------------------------------


Log Entry : 16:17:27 2018年5月23日 

摄像头打开成功！

------------------------------------


Log Entry : 9:09:05 2018年5月25日 

低压舱执行通道2打开！

------------------------------------


Log Entry : 9:09:06 2018年5月25日 

低压舱执行通道2打开成功！

------------------------------------


Log Entry : 9:09:15 2018年5月25日 

摄像头打开成功！

------------------------------------


Log Entry : 9:10:48 2018年5月25日 

执行通道1打开！

------------------------------------


Log Entry : 9:10:50 2018年5月25日 

执行通道1打开成功！

------------------------------------


Log Entry : 9:10:50 2018年5月25日 

执行通道2打开！

------------------------------------


Log Entry : 9:10:52 2018年5月25日 

执行通道2打开成功！

------------------------------------


Log Entry : 9:10:55 2018年5月25日 

执行溶解氧多次测量指令！

------------------------------------


Log Entry : 9:10:57 2018年5月25日 

执行溶解氧多次测量指令成功！

------------------------------------


Log Entry : 9:11:00 2018年5月25日 

执行通道3打开！

------------------------------------


Log Entry : 9:11:02 2018年5月25日 

执行通道3打开成功！

------------------------------------


Log Entry : 9:11:02 2018年5月25日 

执行通道4打开！

------------------------------------


Log Entry : 9:11:04 2018年5月25日 

执行通道4打开成功！

------------------------------------


Log Entry : 9:11:05 2018年5月25日 

执行通道5打开！

------------------------------------


Log Entry : 9:11:07 2018年5月25日 

执行通道5打开成功！

------------------------------------


Log Entry : 9:11:10 2018年5月25日 

执行多参数改变采样间隔指令！

------------------------------------


Log Entry : 9:11:11 2018年5月25日 

多参数改变采样间隔指令执行成功！

------------------------------------


Log Entry : 9:11:14 2018年5月25日 

执行CTD锚系模式指令！

------------------------------------


Log Entry : 9:11:15 2018年5月25日 

CTD锚系模式执行成功！

------------------------------------


Log Entry : 9:12:41 2018年5月25日 

执行CTD锚系模式指令！

------------------------------------


Log Entry : 9:12:43 2018年5月25日 

CTD锚系模式执行成功！

------------------------------------


Log Entry : 9:13:28 2018年5月25日 

执行通道4关闭！

------------------------------------


Log Entry : 9:13:31 2018年5月25日 

执行通道4关闭成功！

------------------------------------


Log Entry : 9:14:09 2018年5月25日 

执行通道4打开！

------------------------------------


Log Entry : 9:14:12 2018年5月25日 

执行通道4打开成功！

------------------------------------


Log Entry : 9:14:43 2018年5月25日 

执行CTD锚系模式指令！

------------------------------------


Log Entry : 9:14:46 2018年5月25日 

CTD锚系模式执行成功！

------------------------------------


Log Entry : 9:21:15 2018年5月25日 

执行通道4关闭！

------------------------------------


Log Entry : 9:21:17 2018年5月25日 

执行通道4关闭成功！

------------------------------------


Log Entry : 9:21:33 2018年5月25日 

执行通道1关闭！

------------------------------------


Log Entry : 9:21:35 2018年5月25日 

执行通道1关闭成功！

------------------------------------


Log Entry : 9:21:35 2018年5月25日 

执行通道2关闭！

------------------------------------


Log Entry : 9:21:37 2018年5月25日 

执行通道2关闭成功！

------------------------------------


Log Entry : 9:21:37 2018年5月25日 

执行通道3关闭！

------------------------------------


Log Entry : 9:21:39 2018年5月25日 

执行通道3关闭成功！

------------------------------------


Log Entry : 9:21:40 2018年5月25日 

执行通道5关闭！

------------------------------------


Log Entry : 9:21:41 2018年5月25日 

执行通道5关闭成功！

------------------------------------


Log Entry : 9:21:44 2018年5月25日 

低压舱执行通道2关闭！

------------------------------------


Log Entry : 9:21:45 2018年5月25日 

低压舱执行通道2关闭成功！

------------------------------------


Log Entry : 9:26:45 2018年5月25日 

低压舱执行通道2打开！

------------------------------------


Log Entry : 9:26:48 2018年5月25日 

低压舱执行通道2打开成功！

------------------------------------


Log Entry : 9:27:34 2018年5月25日 

执行通道4打开！

------------------------------------


Log Entry : 9:27:36 2018年5月25日 

执行通道4打开成功！

------------------------------------


Log Entry : 9:33:08 2018年5月25日 

执行通道4关闭！

------------------------------------


Log Entry : 9:33:11 2018年5月25日 

执行通道4关闭成功！

------------------------------------


Log Entry : 9:34:02 2018年5月25日 

执行通道4打开！

------------------------------------


Log Entry : 9:34:05 2018年5月25日 

执行通道4打开成功！

------------------------------------


Log Entry : 9:34:49 2018年5月25日 

执行CTD锚系模式指令！

------------------------------------


Log Entry : 9:34:52 2018年5月25日 

CTD锚系模式执行成功！

------------------------------------


Log Entry : 9:37:03 2018年5月25日 

执行通道4关闭！

------------------------------------


Log Entry : 9:37:05 2018年5月25日 

执行通道4关闭成功！

------------------------------------


Log Entry : 9:37:21 2018年5月25日 

低压舱执行通道2关闭！

------------------------------------


Log Entry : 9:37:29 2018年5月25日 

低压舱执行通道2关闭成功！

------------------------------------


Log Entry : 9:42:42 2018年5月25日 

低压舱执行通道2打开！

------------------------------------


Log Entry : 9:42:44 2018年5月25日 

低压舱执行通道2打开成功！

------------------------------------


Log Entry : 9:43:31 2018年5月25日 

执行通道4打开！

------------------------------------


Log Entry : 9:43:33 2018年5月25日 

执行通道4打开成功！

------------------------------------


Log Entry : 9:43:37 2018年5月25日 

执行通道5打开！

------------------------------------


Log Entry : 9:43:39 2018年5月25日 

执行通道5打开成功！

------------------------------------


Log Entry : 9:43:42 2018年5月25日 

执行多参数改变采样间隔指令！

------------------------------------


Log Entry : 9:43:44 2018年5月25日 

多参数改变采样间隔指令执行成功！

------------------------------------


Log Entry : 9:44:03 2018年5月25日 

执行CTD锚系模式指令！

------------------------------------


Log Entry : 9:44:05 2018年5月25日 

CTD锚系模式执行成功！

------------------------------------


Log Entry : 9:46:58 2018年5月25日 

执行通道2打开！

------------------------------------


Log Entry : 9:47:00 2018年5月25日 

执行通道2打开成功！

------------------------------------


Log Entry : 9:47:00 2018年5月25日 

执行通道3打开！

------------------------------------


Log Entry : 9:47:02 2018年5月25日 

执行通道3打开成功！

------------------------------------


Log Entry : 9:47:04 2018年5月25日 

执行通道1打开！

------------------------------------


Log Entry : 9:47:06 2018年5月25日 

执行通道1打开成功！

------------------------------------


Log Entry : 9:47:18 2018年5月25日 

执行校准溶解氧时钟指令！

------------------------------------


Log Entry : 9:47:19 2018年5月25日 

执行校准溶解氧时钟指令成功！

------------------------------------


Log Entry : 9:47:20 2018年5月25日 

执行溶解氧多次测量指令！

------------------------------------


Log Entry : 9:47:22 2018年5月25日 

执行溶解氧多次测量指令成功！

------------------------------------


Log Entry : 9:47:23 2018年5月25日 

执行设置溶解氧时间间隔：0005

------------------------------------


Log Entry : 9:47:26 2018年5月25日 

执行设置溶解氧时间间隔失败！

------------------------------------


Log Entry : 9:50:43 2018年5月25日 

执行通道4关闭！

------------------------------------


Log Entry : 9:50:46 2018年5月25日 

执行通道4关闭成功！

------------------------------------


Log Entry : 9:52:53 2018年5月25日 

执行通道4打开！

------------------------------------


Log Entry : 9:52:55 2018年5月25日 

执行通道4打开成功！

------------------------------------


Log Entry : 9:53:02 2018年5月25日 

执行CTD锚系模式指令！

------------------------------------


Log Entry : 9:53:05 2018年5月25日 

CTD锚系模式执行成功！

------------------------------------


Log Entry : 10:27:06 2018年5月25日 

执行通道4关闭！

------------------------------------


Log Entry : 10:27:08 2018年5月25日 

执行通道4关闭成功！

------------------------------------


Log Entry : 10:28:38 2018年5月25日 

执行通道4打开！

------------------------------------


Log Entry : 10:28:40 2018年5月25日 

执行通道4打开成功！

------------------------------------


Log Entry : 10:29:01 2018年5月25日 

执行CTD锚系模式指令！

------------------------------------


Log Entry : 10:29:03 2018年5月25日 

CTD锚系模式执行成功！

------------------------------------


Log Entry : 10:31:34 2018年5月25日 

低压舱执行通道2关闭！

------------------------------------


Log Entry : 10:31:36 2018年5月25日 

低压舱执行通道2关闭成功！

------------------------------------


Log Entry : 10:33:31 2018年5月25日 

低压舱执行通道2打开！

------------------------------------


Log Entry : 10:33:33 2018年5月25日 

低压舱执行通道2打开成功！

------------------------------------


Log Entry : 10:34:00 2018年5月25日 

摄像头打开成功！

------------------------------------


Log Entry : 10:34:16 2018年5月25日 

执行通道1打开！

------------------------------------


Log Entry : 10:34:18 2018年5月25日 

执行通道1打开成功！

------------------------------------


Log Entry : 10:34:19 2018年5月25日 

执行通道2打开！

------------------------------------


Log Entry : 10:34:21 2018年5月25日 

执行通道2打开成功！

------------------------------------


Log Entry : 10:34:24 2018年5月25日 

执行溶解氧多次测量指令！

------------------------------------


Log Entry : 10:34:25 2018年5月25日 

执行溶解氧多次测量指令成功！

------------------------------------


Log Entry : 10:34:29 2018年5月25日 

执行通道3打开！

------------------------------------


Log Entry : 10:34:31 2018年5月25日 

执行通道3打开成功！

------------------------------------


Log Entry : 10:34:32 2018年5月25日 

执行通道4打开！

------------------------------------


Log Entry : 10:34:34 2018年5月25日 

执行通道4打开成功！

------------------------------------


Log Entry : 10:34:34 2018年5月25日 

执行通道5打开！

------------------------------------


Log Entry : 10:34:36 2018年5月25日 

执行通道5打开成功！

------------------------------------


Log Entry : 10:34:38 2018年5月25日 

执行多参数改变采样间隔指令！

------------------------------------


Log Entry : 10:34:40 2018年5月25日 

多参数改变采样间隔指令执行成功！

------------------------------------


Log Entry : 10:34:47 2018年5月25日 

执行CTD锚系模式指令！

------------------------------------


Log Entry : 10:34:48 2018年5月25日 

CTD锚系模式执行成功！

------------------------------------


Log Entry : 10:44:42 2018年5月25日 

执行通道4关闭！

------------------------------------


Log Entry : 10:44:47 2018年5月25日 

执行通道4关闭成功！

------------------------------------


Log Entry : 10:47:11 2018年5月25日 

执行通道4打开！

------------------------------------


Log Entry : 10:47:14 2018年5月25日 

执行通道4打开成功！

------------------------------------


Log Entry : 10:47:29 2018年5月25日 

执行CTD配置模式指令！

------------------------------------


Log Entry : 10:47:31 2018年5月25日 

CTD配置模式执行成功！

------------------------------------


Log Entry : 10:47:33 2018年5月25日 

执行CTD锚系模式指令！

------------------------------------


Log Entry : 10:47:35 2018年5月25日 

CTD锚系模式执行成功！

------------------------------------


Log Entry : 17:04:22 2018年5月25日 

执行通道1关闭！

------------------------------------


Log Entry : 17:04:24 2018年5月25日 

执行通道1关闭成功！

------------------------------------


Log Entry : 17:04:25 2018年5月25日 

执行通道2关闭！

------------------------------------


Log Entry : 17:04:27 2018年5月25日 

执行通道2关闭成功！

------------------------------------


Log Entry : 17:04:27 2018年5月25日 

执行通道3关闭！

------------------------------------


Log Entry : 17:04:29 2018年5月25日 

执行通道3关闭成功！

------------------------------------


Log Entry : 17:04:30 2018年5月25日 

执行通道4关闭！

------------------------------------


Log Entry : 17:04:32 2018年5月25日 

执行通道4关闭成功！

------------------------------------


Log Entry : 17:04:33 2018年5月25日 

执行通道5关闭！

------------------------------------


Log Entry : 17:04:35 2018年5月25日 

执行通道5关闭成功！

------------------------------------


Log Entry : 17:04:46 2018年5月25日 

摄像头关闭成功！

------------------------------------


Log Entry : 17:04:50 2018年5月25日 

低压舱执行通道2关闭！

------------------------------------


Log Entry : 17:04:51 2018年5月25日 

低压舱执行通道2关闭成功！

------------------------------------


Log Entry : 14:22:47 2018年5月28日 

低压舱执行通道2打开！

------------------------------------


Log Entry : 14:22:50 2018年5月28日 

低压舱执行通道2打开成功！

------------------------------------


Log Entry : 14:23:16 2018年5月28日 

摄像头打开成功！

------------------------------------


Log Entry : 14:25:47 2018年5月28日 

执行通道1打开！

------------------------------------


Log Entry : 14:25:49 2018年5月28日 

执行通道1打开成功！

------------------------------------


Log Entry : 14:25:50 2018年5月28日 

执行通道2打开！

------------------------------------


Log Entry : 14:25:52 2018年5月28日 

执行通道2打开成功！

------------------------------------


Log Entry : 14:25:53 2018年5月28日 

执行通道3打开！

------------------------------------


Log Entry : 14:25:55 2018年5月28日 

执行通道3打开成功！

------------------------------------


Log Entry : 14:25:55 2018年5月28日 

执行通道4打开！

------------------------------------


Log Entry : 14:25:58 2018年5月28日 

执行通道4打开成功！

------------------------------------


Log Entry : 14:25:59 2018年5月28日 

执行通道5打开！

------------------------------------


Log Entry : 14:26:01 2018年5月28日 

执行通道5打开成功！

------------------------------------


Log Entry : 14:26:40 2018年5月28日 

执行溶解氧多次测量指令！

------------------------------------


Log Entry : 14:26:42 2018年5月28日 

执行溶解氧多次测量指令成功！

------------------------------------


Log Entry : 14:27:10 2018年5月28日 

执行CTD锚系模式指令！

------------------------------------


Log Entry : 14:27:12 2018年5月28日 

CTD锚系模式执行成功！

------------------------------------


Log Entry : 16:54:48 2018年5月28日 

执行通道1关闭！

------------------------------------


Log Entry : 16:54:50 2018年5月28日 

执行通道1关闭成功！

------------------------------------


Log Entry : 16:54:50 2018年5月28日 

执行通道2关闭！

------------------------------------


Log Entry : 16:54:52 2018年5月28日 

执行通道2关闭成功！

------------------------------------


Log Entry : 16:54:53 2018年5月28日 

执行通道3关闭！

------------------------------------


Log Entry : 16:54:54 2018年5月28日 

执行通道3关闭成功！

------------------------------------


Log Entry : 16:54:55 2018年5月28日 

执行通道4关闭！

------------------------------------


Log Entry : 16:54:56 2018年5月28日 

执行通道4关闭成功！

------------------------------------


Log Entry : 16:54:57 2018年5月28日 

执行通道5关闭！

------------------------------------


Log Entry : 16:55:00 2018年5月28日 

执行通道5关闭成功！

------------------------------------


Log Entry : 16:55:05 2018年5月28日 

摄像头关闭成功！

------------------------------------


Log Entry : 16:55:08 2018年5月28日 

摄像头关闭成功！

------------------------------------


Log Entry : 16:55:15 2018年5月28日 

低压舱执行通道2关闭！

------------------------------------


Log Entry : 16:55:16 2018年5月28日 

低压舱执行通道2关闭成功！

------------------------------------


Log Entry : 9:27:55 2018年5月29日 

摄像头打开成功！

------------------------------------


Log Entry : 9:51:42 2018年5月29日 

低压舱执行通道2打开！

------------------------------------


Log Entry : 9:51:44 2018年5月29日 

低压舱执行通道2打开成功！

------------------------------------


Log Entry : 9:57:25 2018年5月29日 

执行通道1打开！

------------------------------------


Log Entry : 9:57:27 2018年5月29日 

执行通道1打开成功！

------------------------------------


Log Entry : 9:57:28 2018年5月29日 

执行通道2打开！

------------------------------------


Log Entry : 9:57:30 2018年5月29日 

执行通道2打开成功！

------------------------------------


Log Entry : 9:57:33 2018年5月29日 

执行溶解氧多次测量指令！

------------------------------------


Log Entry : 9:57:35 2018年5月29日 

执行溶解氧多次测量指令成功！

------------------------------------


Log Entry : 9:57:37 2018年5月29日 

执行通道3打开！

------------------------------------


Log Entry : 9:57:39 2018年5月29日 

执行通道3打开成功！

------------------------------------


Log Entry : 9:57:40 2018年5月29日 

执行通道4打开！

------------------------------------


Log Entry : 9:57:41 2018年5月29日 

执行通道4打开成功！

------------------------------------


Log Entry : 9:57:42 2018年5月29日 

执行通道5打开！

------------------------------------


Log Entry : 9:57:44 2018年5月29日 

执行通道5打开成功！

------------------------------------


Log Entry : 9:57:46 2018年5月29日 

执行多参数改变采样间隔指令！

------------------------------------


Log Entry : 9:57:48 2018年5月29日 

多参数改变采样间隔指令执行成功！

------------------------------------


Log Entry : 9:57:50 2018年5月29日 

执行CTD锚系模式指令！

------------------------------------


Log Entry : 9:57:51 2018年5月29日 

CTD锚系模式执行成功！

------------------------------------


Log Entry : 14:28:18 2018年6月13日 

低压舱执行通道2打开！

------------------------------------


Log Entry : 14:28:19 2018年6月13日 

低压舱执行通道2打开成功！

------------------------------------


Log Entry : 14:28:21 2018年6月13日 

低压舱执行通道2关闭！

------------------------------------


Log Entry : 14:28:22 2018年6月13日 

低压舱执行通道2关闭成功！

------------------------------------


Log Entry : 14:59:11 2018年6月13日 

低压舱执行通道2打开！

------------------------------------


Log Entry : 14:59:15 2018年6月13日 

低压舱执行通道2打开成功！

------------------------------------


Log Entry : 14:59:28 2018年6月13日 

低压舱执行通道2关闭！

------------------------------------


Log Entry : 14:59:29 2018年6月13日 

低压舱执行通道2关闭成功！

------------------------------------


Log Entry : 15:00:03 2018年6月13日 

低压舱执行通道2打开！

------------------------------------


Log Entry : 15:00:06 2018年6月13日 

低压舱执行通道2打开成功！

------------------------------------


Log Entry : 15:10:20 2018年6月13日 

低压舱执行通道2关闭！

------------------------------------


Log Entry : 15:10:22 2018年6月13日 

低压舱执行通道2关闭成功！

------------------------------------


Log Entry : 15:13:07 2018年6月13日 

低压舱执行通道2打开！

------------------------------------


Log Entry : 15:13:09 2018年6月13日 

低压舱执行通道2打开成功！

------------------------------------


Log Entry : 15:22:12 2018年6月13日 

低压舱执行通道2关闭！

------------------------------------


Log Entry : 15:22:17 2018年6月13日 

低压舱执行通道2关闭成功！

------------------------------------


Log Entry : 10:33:13 2018年6月14日 

低压舱执行通道1打开！

------------------------------------


Log Entry : 10:33:15 2018年6月14日 

低压舱执行通道1打开成功！

------------------------------------


Log Entry : 10:51:19 2018年6月14日 

低压舱执行通道2打开！

------------------------------------


Log Entry : 10:51:22 2018年6月14日 

低压舱执行通道2打开成功！

------------------------------------


Log Entry : 10:55:59 2018年6月14日 

低压舱执行通道2打开！

------------------------------------


Log Entry : 10:56:01 2018年6月14日 

低压舱执行通道2打开成功！

------------------------------------


Log Entry : 10:56:57 2018年6月14日 

低压舱执行通道2打开！

------------------------------------


Log Entry : 10:56:58 2018年6月14日 

低压舱执行通道2打开成功！

------------------------------------


Log Entry : 10:57:05 2018年6月14日 

执行通道3打开！

------------------------------------


Log Entry : 10:57:07 2018年6月14日 

执行通道3打开成功！

------------------------------------


Log Entry : 10:58:09 2018年6月14日 

低压舱执行通道2打开！

------------------------------------


Log Entry : 10:58:10 2018年6月14日 

低压舱执行通道2打开成功！

------------------------------------


Log Entry : 11:02:57 2018年6月14日 

低压舱执行通道2打开！

------------------------------------


Log Entry : 11:02:59 2018年6月14日 

低压舱执行通道2打开成功！

------------------------------------


Log Entry : 11:03:43 2018年6月14日 

低压舱执行通道2关闭！

------------------------------------


Log Entry : 11:03:44 2018年6月14日 

低压舱执行通道2关闭成功！

------------------------------------


Log Entry : 11:06:09 2018年6月14日 

低压舱执行通道2打开！

------------------------------------


Log Entry : 11:06:11 2018年6月14日 

低压舱执行通道2打开成功！

------------------------------------


Log Entry : 11:06:12 2018年6月14日 

低压舱执行通道1打开！

------------------------------------


Log Entry : 11:06:14 2018年6月14日 

低压舱执行通道1打开成功！

------------------------------------


Log Entry : 11:17:06 2018年6月14日 

低压舱执行通道1打开！

------------------------------------


Log Entry : 11:17:08 2018年6月14日 

低压舱执行通道1打开成功！

------------------------------------


Log Entry : 11:17:09 2018年6月14日 

低压舱执行通道2打开！

------------------------------------


Log Entry : 11:17:10 2018年6月14日 

低压舱执行通道2打开成功！

------------------------------------


Log Entry : 11:17:11 2018年6月14日 

低压舱执行通道1关闭！

------------------------------------


Log Entry : 11:17:13 2018年6月14日 

低压舱执行通道1关闭成功！

------------------------------------


Log Entry : 11:17:14 2018年6月14日 

低压舱执行通道2关闭！

------------------------------------


Log Entry : 11:17:18 2018年6月14日 

低压舱执行通道2关闭成功！

------------------------------------


Log Entry : 11:17:27 2018年6月14日 

摄像头打开成功！

------------------------------------


Log Entry : 11:19:36 2018年6月14日 

低压舱执行通道1打开！

------------------------------------


Log Entry : 11:19:38 2018年6月14日 

低压舱执行通道1打开成功！

------------------------------------


Log Entry : 11:22:33 2018年6月14日 

低压舱执行通道1关闭！

------------------------------------


Log Entry : 11:22:35 2018年6月14日 

低压舱执行通道1关闭成功！

------------------------------------


Log Entry : 11:25:18 2018年6月14日 

低压舱执行通道2打开！

------------------------------------


Log Entry : 11:25:19 2018年6月14日 

低压舱执行通道2打开成功！

------------------------------------


Log Entry : 11:35:00 2018年6月14日 

执行通道1打开！

------------------------------------


Log Entry : 11:35:02 2018年6月14日 

执行通道1打开成功！

------------------------------------


Log Entry : 11:35:02 2018年6月14日 

执行通道2打开！

------------------------------------


Log Entry : 11:35:04 2018年6月14日 

执行通道2打开成功！

------------------------------------


Log Entry : 11:35:04 2018年6月14日 

执行通道3打开！

------------------------------------


Log Entry : 11:35:06 2018年6月14日 

执行通道3打开成功！

------------------------------------


Log Entry : 11:35:07 2018年6月14日 

执行通道4打开！

------------------------------------


Log Entry : 11:35:08 2018年6月14日 

执行通道4打开成功！

------------------------------------


Log Entry : 11:35:15 2018年6月14日 

执行CTD锚系模式指令！

------------------------------------


Log Entry : 11:35:17 2018年6月14日 

CTD锚系模式执行成功！

------------------------------------


Log Entry : 11:35:21 2018年6月14日 

执行溶解氧多次测量指令！

------------------------------------


Log Entry : 11:35:23 2018年6月14日 

执行溶解氧多次测量指令成功！

------------------------------------


Log Entry : 11:37:35 2018年6月14日 

低压舱执行通道2打开！

------------------------------------


Log Entry : 11:37:36 2018年6月14日 

低压舱执行通道2打开成功！

------------------------------------


Log Entry : 13:06:48 2018年6月14日 

低压舱执行通道2打开！

------------------------------------


Log Entry : 13:06:50 2018年6月14日 

低压舱执行通道2打开成功！

------------------------------------


Log Entry : 13:15:49 2018年6月14日 

低压舱执行通道2关闭！

------------------------------------


Log Entry : 13:15:52 2018年6月14日 

低压舱执行通道2关闭成功！

------------------------------------


Log Entry : 11:11:13 2018年6月26日 

执行通道1打开！

------------------------------------


Log Entry : 11:11:15 2018年6月26日 

执行通道1打开成功！

------------------------------------


Log Entry : 11:11:24 2018年6月26日 

执行溶解氧多次测量指令！

------------------------------------


Log Entry : 11:11:26 2018年6月26日 

执行溶解氧多次测量指令成功！

------------------------------------


Log Entry : 13:22:27 2018年6月26日 

执行通道1打开！

------------------------------------


Log Entry : 13:22:31 2018年6月26日 

执行通道1打开成功！

------------------------------------


Log Entry : 13:22:41 2018年6月26日 

执行溶解氧多次测量指令！

------------------------------------


Log Entry : 13:22:43 2018年6月26日 

执行溶解氧多次测量指令成功！

------------------------------------


Log Entry : 13:52:55 2018年6月26日 

执行通道1打开！

------------------------------------


Log Entry : 13:52:57 2018年6月26日 

执行通道1打开成功！

------------------------------------


Log Entry : 13:54:40 2018年6月26日 

执行溶解氧存储芯片擦除指令！

------------------------------------


Log Entry : 13:54:42 2018年6月26日 

执行溶解氧存储芯片擦除指令成功！

------------------------------------


Log Entry : 13:54:47 2018年6月26日 

执行溶解氧多次测量指令！

------------------------------------


Log Entry : 13:54:49 2018年6月26日 

执行溶解氧多次测量指令成功！

------------------------------------


Log Entry : 11:35:59 2018年6月27日 

低压舱执行通道1打开！

------------------------------------


Log Entry : 11:36:03 2018年6月27日 

低压舱执行通道1打开成功！

------------------------------------


Log Entry : 11:36:11 2018年6月27日 

低压舱执行通道1关闭！

------------------------------------


Log Entry : 11:36:13 2018年6月27日 

低压舱执行通道1关闭成功！

------------------------------------


Log Entry : 11:39:29 2018年6月27日 

低压舱执行通道1打开！

------------------------------------


Log Entry : 11:40:04 2018年6月27日 

低压舱执行通道1打开！

------------------------------------


Log Entry : 11:40:06 2018年6月27日 

低压舱执行通道1打开成功！

------------------------------------


Log Entry : 11:40:10 2018年6月27日 

低压舱执行通道2打开！

------------------------------------


Log Entry : 11:40:14 2018年6月27日 

低压舱执行通道2打开成功！

------------------------------------


Log Entry : 11:40:26 2018年6月27日 

低压舱执行通道1关闭！

------------------------------------


Log Entry : 11:40:28 2018年6月27日 

低压舱执行通道1关闭成功！

------------------------------------


Log Entry : 11:40:29 2018年6月27日 

低压舱执行通道2关闭！

------------------------------------


Log Entry : 11:40:30 2018年6月27日 

低压舱执行通道2关闭成功！

------------------------------------


Log Entry : 11:41:36 2018年6月27日 

低压舱执行通道2打开！

------------------------------------


Log Entry : 11:41:38 2018年6月27日 

低压舱执行通道2打开成功！

------------------------------------


Log Entry : 11:41:43 2018年6月27日 

低压舱执行通道1打开！

------------------------------------


Log Entry : 11:41:45 2018年6月27日 

低压舱执行通道1打开成功！

------------------------------------


Log Entry : 11:41:55 2018年6月27日 

低压舱执行通道1关闭！

------------------------------------


Log Entry : 11:41:59 2018年6月27日 

低压舱执行通道1关闭成功！

------------------------------------


Log Entry : 11:42:19 2018年6月27日 

低压舱执行通道2关闭！

------------------------------------


Log Entry : 11:42:20 2018年6月27日 

低压舱执行通道2关闭成功！

------------------------------------


Log Entry : 11:51:53 2018年6月27日 

执行通道1打开！

------------------------------------


Log Entry : 11:51:55 2018年6月27日 

执行通道1打开成功！

------------------------------------


Log Entry : 11:51:55 2018年6月27日 

执行通道2打开！

------------------------------------


Log Entry : 11:51:57 2018年6月27日 

执行通道2打开成功！

------------------------------------


Log Entry : 11:51:58 2018年6月27日 

执行通道3打开！

------------------------------------


Log Entry : 11:52:00 2018年6月27日 

执行通道3打开成功！

------------------------------------


Log Entry : 11:52:01 2018年6月27日 

执行通道4打开！

------------------------------------


Log Entry : 11:52:03 2018年6月27日 

执行通道4打开成功！

------------------------------------


Log Entry : 11:52:06 2018年6月27日 

执行溶解氧多次测量指令！

------------------------------------


Log Entry : 11:52:07 2018年6月27日 

执行溶解氧多次测量指令成功！

------------------------------------


Log Entry : 11:52:11 2018年6月27日 

执行CTD锚系模式指令！

------------------------------------


Log Entry : 11:52:12 2018年6月27日 

CTD锚系模式执行成功！

------------------------------------


Log Entry : 13:05:17 2018年6月27日 

执行通道1关闭！

------------------------------------


Log Entry : 13:05:20 2018年6月27日 

执行通道1关闭成功！

------------------------------------


Log Entry : 13:05:23 2018年6月27日 

执行通道2关闭！

------------------------------------


Log Entry : 13:05:25 2018年6月27日 

执行通道2关闭成功！

------------------------------------


Log Entry : 13:05:26 2018年6月27日 

执行通道3关闭！

------------------------------------


Log Entry : 13:05:28 2018年6月27日 

执行通道3关闭成功！

------------------------------------


Log Entry : 13:05:29 2018年6月27日 

执行通道4关闭！

------------------------------------


Log Entry : 13:05:31 2018年6月27日 

执行通道4关闭成功！

------------------------------------


Log Entry : 13:56:46 2018年6月27日 

低压舱执行通道1打开！

------------------------------------


Log Entry : 13:56:48 2018年6月27日 

低压舱执行通道1打开成功！

------------------------------------


Log Entry : 13:57:11 2018年6月27日 

低压舱执行通道1关闭！

------------------------------------


Log Entry : 13:57:13 2018年6月27日 

低压舱执行通道1关闭成功！

------------------------------------


Log Entry : 13:58:01 2018年6月27日 

低压舱执行通道1打开！

------------------------------------


Log Entry : 13:58:03 2018年6月27日 

低压舱执行通道1打开成功！

------------------------------------


Log Entry : 13:59:00 2018年6月27日 

低压舱执行通道1关闭！

------------------------------------


Log Entry : 13:59:01 2018年6月27日 

低压舱执行通道1关闭成功！

------------------------------------


Log Entry : 16:49:37 2018年6月27日 

低压舱执行通道1打开！

------------------------------------


Log Entry : 16:49:40 2018年6月27日 

低压舱执行通道1打开成功！

------------------------------------


Log Entry : 16:50:06 2018年6月27日 

低压舱执行通道1关闭！

------------------------------------


Log Entry : 16:50:09 2018年6月27日 

低压舱执行通道1关闭成功！

------------------------------------


Log Entry : 16:52:12 2018年6月27日 

低压舱执行通道1打开！

------------------------------------


Log Entry : 16:52:14 2018年6月27日 

低压舱执行通道1打开成功！

------------------------------------


Log Entry : 16:53:25 2018年6月27日 

执行通道1打开！

------------------------------------


Log Entry : 16:53:27 2018年6月27日 

执行通道1打开成功！

------------------------------------


Log Entry : 16:53:28 2018年6月27日 

执行通道2打开！

------------------------------------


Log Entry : 16:53:30 2018年6月27日 

执行通道2打开成功！

------------------------------------


Log Entry : 16:53:32 2018年6月27日 

执行通道3打开！

------------------------------------


Log Entry : 16:53:34 2018年6月27日 

执行通道3打开成功！

------------------------------------


Log Entry : 16:53:35 2018年6月27日 

执行通道4打开！

------------------------------------


Log Entry : 16:53:37 2018年6月27日 

执行通道4打开成功！

------------------------------------


Log Entry : 16:53:38 2018年6月27日 

执行通道5打开！

------------------------------------


Log Entry : 16:53:40 2018年6月27日 

执行通道5打开成功！

------------------------------------


Log Entry : 16:54:05 2018年6月27日 

摄像头打开成功！

------------------------------------


Log Entry : 16:57:21 2018年6月27日 

执行通道1关闭！

------------------------------------


Log Entry : 16:57:23 2018年6月27日 

执行通道1关闭成功！

------------------------------------


Log Entry : 16:57:24 2018年6月27日 

执行通道2关闭！

------------------------------------


Log Entry : 16:57:26 2018年6月27日 

执行通道2关闭成功！

------------------------------------


Log Entry : 16:57:28 2018年6月27日 

执行通道3关闭！

------------------------------------


Log Entry : 16:57:30 2018年6月27日 

执行通道3关闭成功！

------------------------------------


Log Entry : 16:57:33 2018年6月27日 

执行通道4关闭！

------------------------------------


Log Entry : 16:57:36 2018年6月27日 

执行通道4关闭成功！

------------------------------------


Log Entry : 16:57:43 2018年6月27日 

执行通道5关闭！

------------------------------------


Log Entry : 16:57:46 2018年6月27日 

执行通道5关闭成功！

------------------------------------


Log Entry : 16:57:54 2018年6月27日 

低压舱执行通道1关闭！

------------------------------------


Log Entry : 16:57:56 2018年6月27日 

低压舱执行通道1关闭成功！

------------------------------------


Log Entry : 16:58:12 2018年6月27日 

摄像头关闭成功！

------------------------------------


Log Entry : 10:05:58 2018年6月28日 

摄像头打开成功！

------------------------------------


Log Entry : 10:06:03 2018年6月28日 

摄像头关闭成功！

------------------------------------


Log Entry : 10:06:06 2018年6月28日 

摄像头打开成功！

------------------------------------


Log Entry : 10:06:32 2018年6月28日 

低压舱执行通道1打开！

------------------------------------


Log Entry : 10:06:36 2018年6月28日 

低压舱执行通道1打开成功！

------------------------------------


Log Entry : 10:07:12 2018年6月28日 

执行通道1打开！

------------------------------------


Log Entry : 10:07:15 2018年6月28日 

执行通道1打开失败！

------------------------------------


Log Entry : 10:07:39 2018年6月28日 

执行通道1打开！

------------------------------------


Log Entry : 10:07:42 2018年6月28日 

执行通道1打开成功！

------------------------------------


Log Entry : 10:07:44 2018年6月28日 

执行通道2打开！

------------------------------------


Log Entry : 10:07:46 2018年6月28日 

执行通道2打开成功！

------------------------------------


Log Entry : 10:07:48 2018年6月28日 

执行通道3打开！

------------------------------------


Log Entry : 10:07:50 2018年6月28日 

执行通道3打开成功！

------------------------------------


Log Entry : 10:08:07 2018年6月28日 

执行通道4打开！

------------------------------------


Log Entry : 10:08:11 2018年6月28日 

执行通道4打开成功！

------------------------------------


Log Entry : 10:08:42 2018年6月28日 

执行溶解氧多次测量指令！

------------------------------------


Log Entry : 10:08:45 2018年6月28日 

执行溶解氧多次测量指令成功！

------------------------------------


Log Entry : 10:08:53 2018年6月28日 

执行CTD锚系模式指令！

------------------------------------


Log Entry : 10:08:56 2018年6月28日 

CTD锚系模式执行成功！

------------------------------------


Log Entry : 10:43:41 2018年6月28日 

执行通道5打开！

------------------------------------


Log Entry : 10:43:43 2018年6月28日 

执行通道5打开成功！

------------------------------------


Log Entry : 10:43:58 2018年6月28日 

执行多参数改变采样间隔指令！

------------------------------------


Log Entry : 10:44:00 2018年6月28日 

多参数改变采样间隔指令执行成功！

------------------------------------


Log Entry : 13:11:00 2018年6月28日 

执行通道1关闭！

------------------------------------


Log Entry : 13:11:03 2018年6月28日 

执行通道1关闭成功！

------------------------------------


Log Entry : 13:11:04 2018年6月28日 

执行通道2关闭！

------------------------------------


Log Entry : 13:11:06 2018年6月28日 

执行通道2关闭成功！

------------------------------------


Log Entry : 13:11:07 2018年6月28日 

执行通道3关闭！

------------------------------------


Log Entry : 13:11:09 2018年6月28日 

执行通道3关闭成功！

------------------------------------


Log Entry : 13:11:10 2018年6月28日 

执行通道4关闭！

------------------------------------


Log Entry : 13:11:13 2018年6月28日 

执行通道4关闭成功！

------------------------------------


Log Entry : 13:11:15 2018年6月28日 

执行通道5关闭！

------------------------------------


Log Entry : 13:11:17 2018年6月28日 

执行通道5关闭成功！

------------------------------------


Log Entry : 13:11:25 2018年6月28日 

低压舱执行通道1关闭！

------------------------------------


Log Entry : 13:11:29 2018年6月28日 

低压舱执行通道1关闭成功！

------------------------------------


Log Entry : 13:12:01 2018年6月28日 

摄像头关闭成功！

------------------------------------


Log Entry : 14:13:22 2018年6月28日 

低压舱执行通道2打开！

------------------------------------


Log Entry : 14:13:24 2018年6月28日 

低压舱执行通道2打开成功！

------------------------------------


Log Entry : 14:14:16 2018年6月28日 

执行通道1打开！

------------------------------------


Log Entry : 14:14:19 2018年6月28日 

执行通道1打开成功！

------------------------------------


Log Entry : 14:14:20 2018年6月28日 

执行通道2打开！

------------------------------------


Log Entry : 14:14:22 2018年6月28日 

执行通道2打开成功！

------------------------------------


Log Entry : 14:14:23 2018年6月28日 

执行通道3打开！

------------------------------------


Log Entry : 14:14:25 2018年6月28日 

执行通道3打开成功！

------------------------------------


Log Entry : 14:14:25 2018年6月28日 

执行通道4打开！

------------------------------------


Log Entry : 14:14:28 2018年6月28日 

执行通道4打开成功！

------------------------------------


Log Entry : 14:14:28 2018年6月28日 

执行通道5打开！

------------------------------------


Log Entry : 14:14:30 2018年6月28日 

执行通道5打开成功！

------------------------------------


Log Entry : 14:16:14 2018年6月28日 

执行溶解氧多次测量指令！

------------------------------------


Log Entry : 14:16:16 2018年6月28日 

执行溶解氧多次测量指令成功！

------------------------------------


Log Entry : 14:16:24 2018年6月28日 

执行CTD锚系模式指令！

------------------------------------


Log Entry : 14:16:26 2018年6月28日 

CTD锚系模式执行成功！

------------------------------------


Log Entry : 14:16:34 2018年6月28日 

执行多参数改变采样间隔指令！

------------------------------------


Log Entry : 14:16:36 2018年6月28日 

多参数改变采样间隔指令执行成功！

------------------------------------


Log Entry : 14:31:32 2018年6月28日 

执行通道1关闭！

------------------------------------


Log Entry : 14:31:35 2018年6月28日 

执行通道1关闭成功！

------------------------------------


Log Entry : 14:31:35 2018年6月28日 

执行通道2关闭！

------------------------------------


Log Entry : 14:31:37 2018年6月28日 

执行通道2关闭成功！

------------------------------------


Log Entry : 14:31:38 2018年6月28日 

执行通道3关闭！

------------------------------------


Log Entry : 14:31:40 2018年6月28日 

执行通道3关闭成功！

------------------------------------


Log Entry : 14:31:40 2018年6月28日 

执行通道4关闭！

------------------------------------


Log Entry : 14:31:42 2018年6月28日 

执行通道4关闭成功！

------------------------------------


Log Entry : 14:31:43 2018年6月28日 

执行通道5关闭！

------------------------------------


Log Entry : 14:31:45 2018年6月28日 

执行通道5关闭成功！

------------------------------------


Log Entry : 14:31:56 2018年6月28日 

低压舱执行通道2关闭！

------------------------------------


Log Entry : 14:31:58 2018年6月28日 

低压舱执行通道2关闭成功！

------------------------------------


Log Entry : 15:12:45 2018年6月28日 

低压舱执行通道2打开！

------------------------------------


Log Entry : 15:12:47 2018年6月28日 

低压舱执行通道2打开成功！

------------------------------------


Log Entry : 15:13:39 2018年6月28日 

执行通道1打开！

------------------------------------


Log Entry : 15:13:41 2018年6月28日 

执行通道1打开成功！

------------------------------------


Log Entry : 15:13:43 2018年6月28日 

执行通道2打开！

------------------------------------


Log Entry : 15:13:45 2018年6月28日 

执行通道2打开成功！

------------------------------------


Log Entry : 15:13:46 2018年6月28日 

执行通道3打开！

------------------------------------


Log Entry : 15:13:48 2018年6月28日 

执行通道3打开成功！

------------------------------------


Log Entry : 15:13:49 2018年6月28日 

执行通道4打开！

------------------------------------


Log Entry : 15:13:51 2018年6月28日 

执行通道4打开成功！

------------------------------------


Log Entry : 15:13:52 2018年6月28日 

执行通道5打开！

------------------------------------


Log Entry : 15:13:54 2018年6月28日 

执行通道5打开成功！

------------------------------------


Log Entry : 15:13:58 2018年6月28日 

执行溶解氧多次测量指令！

------------------------------------


Log Entry : 15:14:00 2018年6月28日 

执行溶解氧多次测量指令成功！

------------------------------------


Log Entry : 15:14:03 2018年6月28日 

执行CTD锚系模式指令！

------------------------------------


Log Entry : 15:14:05 2018年6月28日 

CTD锚系模式执行成功！

------------------------------------


Log Entry : 15:14:07 2018年6月28日 

执行多参数改变采样间隔指令！

------------------------------------


Log Entry : 15:14:09 2018年6月28日 

多参数改变采样间隔指令执行成功！

------------------------------------


Log Entry : 15:14:25 2018年6月28日 

摄像头打开成功！

------------------------------------


Log Entry : 16:54:22 2018年6月28日 

执行通道1关闭！

------------------------------------


Log Entry : 16:54:24 2018年6月28日 

执行通道1关闭成功！

------------------------------------


Log Entry : 16:54:24 2018年6月28日 

执行通道2关闭！

------------------------------------


Log Entry : 16:54:26 2018年6月28日 

执行通道2关闭成功！

------------------------------------


Log Entry : 16:54:27 2018年6月28日 

执行通道3关闭！

------------------------------------


Log Entry : 16:54:29 2018年6月28日 

执行通道3关闭成功！

------------------------------------


Log Entry : 16:54:29 2018年6月28日 

执行通道4关闭！

------------------------------------


Log Entry : 16:54:31 2018年6月28日 

执行通道4关闭成功！

------------------------------------


Log Entry : 16:54:32 2018年6月28日 

执行通道5关闭！

------------------------------------


Log Entry : 16:54:33 2018年6月28日 

执行通道5关闭成功！

------------------------------------


Log Entry : 16:54:48 2018年6月28日 

低压舱执行通道2关闭！

------------------------------------


Log Entry : 16:54:50 2018年6月28日 

低压舱执行通道2关闭成功！

------------------------------------


Log Entry : 16:55:13 2018年6月28日 

摄像头关闭成功！

------------------------------------


Log Entry : 10:37:53 2018年6月29日 

低压舱执行通道2打开！

------------------------------------


Log Entry : 10:37:55 2018年6月29日 

低压舱执行通道2打开成功！

------------------------------------


Log Entry : 10:38:08 2018年6月29日 

摄像头打开成功！

------------------------------------


Log Entry : 10:38:45 2018年6月29日 

执行通道1打开！

------------------------------------


Log Entry : 10:38:47 2018年6月29日 

执行通道1打开成功！

------------------------------------


Log Entry : 10:38:49 2018年6月29日 

执行通道2打开！

------------------------------------


Log Entry : 10:38:51 2018年6月29日 

执行通道2打开成功！

------------------------------------


Log Entry : 10:38:55 2018年6月29日 

执行通道3打开！

------------------------------------


Log Entry : 10:38:57 2018年6月29日 

执行通道3打开成功！

------------------------------------


Log Entry : 10:38:57 2018年6月29日 

执行通道4打开！

------------------------------------


Log Entry : 10:39:00 2018年6月29日 

执行通道4打开成功！

------------------------------------


Log Entry : 10:39:00 2018年6月29日 

执行通道5打开！

------------------------------------


Log Entry : 10:39:02 2018年6月29日 

执行通道5打开成功！

------------------------------------


Log Entry : 10:39:12 2018年6月29日 

执行溶解氧多次测量指令！

------------------------------------


Log Entry : 10:39:14 2018年6月29日 

执行溶解氧多次测量指令成功！

------------------------------------


Log Entry : 10:39:24 2018年6月29日 

执行CTD锚系模式指令！

------------------------------------


Log Entry : 10:39:26 2018年6月29日 

CTD锚系模式执行成功！

------------------------------------


Log Entry : 10:39:29 2018年6月29日 

执行多参数改变采样间隔指令！

------------------------------------


Log Entry : 10:39:31 2018年6月29日 

多参数改变采样间隔指令执行成功！

------------------------------------


Log Entry : 13:17:34 2018年6月29日 

执行通道1关闭！

------------------------------------


Log Entry : 13:17:36 2018年6月29日 

执行通道1关闭成功！

------------------------------------


Log Entry : 13:17:36 2018年6月29日 

执行通道2关闭！

------------------------------------


Log Entry : 13:17:38 2018年6月29日 

执行通道2关闭成功！

------------------------------------


Log Entry : 13:17:38 2018年6月29日 

执行通道3关闭！

------------------------------------


Log Entry : 13:17:40 2018年6月29日 

执行通道3关闭成功！

------------------------------------


Log Entry : 13:17:41 2018年6月29日 

执行通道4关闭！

------------------------------------


Log Entry : 13:17:43 2018年6月29日 

执行通道4关闭成功！

------------------------------------


Log Entry : 13:17:43 2018年6月29日 

执行通道5关闭！

------------------------------------


Log Entry : 13:17:45 2018年6月29日 

执行通道5关闭成功！

------------------------------------


Log Entry : 13:18:07 2018年6月29日 

低压舱执行通道2关闭！

------------------------------------


Log Entry : 13:18:09 2018年6月29日 

低压舱执行通道2关闭成功！

------------------------------------


Log Entry : 13:18:22 2018年6月29日 

摄像头关闭成功！

------------------------------------


Log Entry : 13:40:01 2018年7月2日 

低压舱执行通道2打开！

------------------------------------


Log Entry : 13:40:05 2018年7月2日 

低压舱执行通道2打开成功！

------------------------------------


Log Entry : 13:40:57 2018年7月2日 

摄像头打开成功！

------------------------------------


Log Entry : 13:41:09 2018年7月2日 

执行通道1打开！

------------------------------------


Log Entry : 13:41:11 2018年7月2日 

执行通道1打开成功！

------------------------------------


Log Entry : 13:41:16 2018年7月2日 

执行通道2打开！

------------------------------------


Log Entry : 13:41:18 2018年7月2日 

执行通道2打开成功！

------------------------------------


Log Entry : 13:41:19 2018年7月2日 

执行通道3打开！

------------------------------------


Log Entry : 13:41:21 2018年7月2日 

执行通道3打开成功！

------------------------------------


Log Entry : 13:41:21 2018年7月2日 

执行通道4打开！

------------------------------------


Log Entry : 13:41:23 2018年7月2日 

执行通道4打开成功！

------------------------------------


Log Entry : 13:41:25 2018年7月2日 

执行通道5打开！

------------------------------------


Log Entry : 13:41:27 2018年7月2日 

执行通道5打开成功！

------------------------------------


Log Entry : 13:41:31 2018年7月2日 

执行溶解氧多次测量指令！

------------------------------------


Log Entry : 13:41:33 2018年7月2日 

执行溶解氧多次测量指令成功！

------------------------------------


Log Entry : 13:41:37 2018年7月2日 

执行CTD锚系模式指令！

------------------------------------


Log Entry : 13:41:39 2018年7月2日 

CTD锚系模式执行成功！

------------------------------------


Log Entry : 13:41:43 2018年7月2日 

执行多参数改变采样间隔指令！

------------------------------------


Log Entry : 13:41:45 2018年7月2日 

多参数改变采样间隔指令执行成功！

------------------------------------


Log Entry : 11:22:24 2020年7月3日 

执行高压舱通道1打开！

------------------------------------


Log Entry : 10:31:46 2020年7月17日 星期五 

执行通道1打开！

------------------------------------


Log Entry : 10:32:09 2020年7月17日 星期五 

执行通道1打开失败！

------------------------------------


Log Entry : 10:57:38 2020年7月21日 星期二 

执行高压舱通道1打开！

------------------------------------


Log Entry : 10:57:44 2020年7月21日 星期二 

执行高压舱通道1打开失败！

------------------------------------


Log Entry : 13:29:36 2020年7月21日 星期二 

校时指令执行成功！

------------------------------------


Log Entry : 11:21:18 2020年7月27日 星期一 

执行通道1打开！

------------------------------------


Log Entry : 11:21:33 2020年7月27日 星期一 

执行通道1打开失败！

------------------------------------


Log Entry : 11:22:17 2020年7月27日 星期一 

执行通道1打开！

------------------------------------


Log Entry : 11:22:40 2020年7月27日 星期一 

执行通道1打开失败！

------------------------------------


Log Entry : 11:32:09 2020年7月27日 星期一 

执行通道1打开！

------------------------------------


Log Entry : 11:32:34 2020年7月27日 星期一 

执行通道1打开失败！

------------------------------------


Log Entry : 11:32:36 2020年7月27日 星期一 

执行通道1打开！

------------------------------------


Log Entry : 11:33:43 2020年7月27日 星期一 

执行通道1打开失败！

------------------------------------


Log Entry : 15:41:22 2020年8月3日 星期一 

接驳盒通道1打开！

------------------------------------


Log Entry : 15:41:31 2020年8月3日 星期一 

接驳盒执行通道1打开失败！

------------------------------------


Log Entry : 15:44:52 2020年8月3日 星期一 

接驳盒通道1打开！

------------------------------------


Log Entry : 15:44:57 2020年8月3日 星期一 

接驳盒执行通道1打开成功！

------------------------------------


Log Entry : 15:45:08 2020年8月3日 星期一 

接驳盒执行通道2打开！

------------------------------------


Log Entry : 15:45:14 2020年8月3日 星期一 

接驳盒执行通道2打开成功！

------------------------------------


Log Entry : 15:45:20 2020年8月3日 星期一 

接驳盒执行通道3打开！

------------------------------------


Log Entry : 15:45:30 2020年8月3日 星期一 

接驳盒执行通道3打开失败！

------------------------------------


Log Entry : 15:45:38 2020年8月3日 星期一 

接驳盒执行通道4打开！

------------------------------------


Log Entry : 15:45:42 2020年8月3日 星期一 

接驳盒执行通道4打开成功！

------------------------------------


Log Entry : 15:45:47 2020年8月3日 星期一 

接驳盒执行通道5打开！

------------------------------------


Log Entry : 15:45:51 2020年8月3日 星期一 

接驳盒执行通道5打开成功！

------------------------------------


Log Entry : 15:45:57 2020年8月3日 星期一 

接驳盒执行通道3打开！

------------------------------------


Log Entry : 15:46:01 2020年8月3日 星期一 

接驳盒执行通道3打开成功！

------------------------------------


Log Entry : 15:52:59 2020年8月3日 星期一 

接驳盒通道1打开！

------------------------------------


Log Entry : 15:53:03 2020年8月3日 星期一 

接驳盒执行通道1打开成功！

------------------------------------


Log Entry : 15:53:06 2020年8月3日 星期一 

接驳盒执行通道2打开！

------------------------------------


Log Entry : 15:53:10 2020年8月3日 星期一 

接驳盒执行通道2打开成功！

------------------------------------


Log Entry : 15:53:16 2020年8月3日 星期一 

接驳盒执行通道3打开！

------------------------------------


Log Entry : 15:53:21 2020年8月3日 星期一 

接驳盒执行通道3打开成功！

------------------------------------


Log Entry : 15:53:49 2020年8月3日 星期一 

接驳盒执行通道4打开！

------------------------------------


Log Entry : 15:53:53 2020年8月3日 星期一 

接驳盒执行通道4打开成功！

------------------------------------


Log Entry : 15:53:57 2020年8月3日 星期一 

接驳盒执行通道5打开！

------------------------------------


Log Entry : 15:54:03 2020年8月3日 星期一 

接驳盒执行通道5打开成功！

------------------------------------


Log Entry : 15:55:21 2020年8月3日 星期一 

接驳盒通道1打开！

------------------------------------


Log Entry : 15:55:25 2020年8月3日 星期一 

接驳盒执行通道1打开成功！

------------------------------------


Log Entry : 15:55:29 2020年8月3日 星期一 

接驳盒执行通道2打开！

------------------------------------


Log Entry : 15:55:32 2020年8月3日 星期一 

接驳盒执行通道2打开成功！

------------------------------------


Log Entry : 15:55:36 2020年8月3日 星期一 

接驳盒执行通道3打开！

------------------------------------


Log Entry : 15:55:40 2020年8月3日 星期一 

接驳盒执行通道3打开成功！

------------------------------------


Log Entry : 15:55:43 2020年8月3日 星期一 

接驳盒执行通道4打开！

------------------------------------


Log Entry : 15:55:47 2020年8月3日 星期一 

接驳盒执行通道4打开成功！

------------------------------------


Log Entry : 15:55:51 2020年8月3日 星期一 

接驳盒执行通道5打开！

------------------------------------


Log Entry : 15:55:55 2020年8月3日 星期一 

接驳盒执行通道5打开成功！

------------------------------------


Log Entry : 15:56:41 2020年8月3日 星期一 

接驳盒执行通道1关闭！

------------------------------------


Log Entry : 15:56:45 2020年8月3日 星期一 

接驳盒执行通道1关闭成功！

------------------------------------


Log Entry : 15:56:49 2020年8月3日 星期一 

接驳盒执行通道2关闭！

------------------------------------


Log Entry : 15:56:53 2020年8月3日 星期一 

接驳盒执行通道2关闭成功！

------------------------------------


Log Entry : 15:57:00 2020年8月3日 星期一 

接驳盒执行通道3关闭！

------------------------------------


Log Entry : 15:57:07 2020年8月3日 星期一 

接驳盒执行通道3关闭失败！

------------------------------------


Log Entry : 15:57:08 2020年8月3日 星期一 

接驳盒执行通道3关闭！

------------------------------------


Log Entry : 15:57:12 2020年8月3日 星期一 

接驳盒执行通道3关闭成功！

------------------------------------


Log Entry : 15:57:20 2020年8月3日 星期一 

接驳盒执行通道4关闭！

------------------------------------


Log Entry : 15:57:24 2020年8月3日 星期一 

接驳盒执行通道4关闭成功！

------------------------------------


Log Entry : 15:57:28 2020年8月3日 星期一 

接驳盒执行通道5关闭！

------------------------------------


Log Entry : 15:57:34 2020年8月3日 星期一 

接驳盒执行通道5关闭失败！

------------------------------------


Log Entry : 15:57:37 2020年8月3日 星期一 

接驳盒执行通道5关闭！

------------------------------------


Log Entry : 15:57:41 2020年8月3日 星期一 

接驳盒执行通道5关闭成功！

------------------------------------


Log Entry : 15:58:02 2020年8月3日 星期一 

接驳盒执行通道2打开！

------------------------------------


Log Entry : 15:58:06 2020年8月3日 星期一 

接驳盒执行通道2打开成功！

------------------------------------


Log Entry : 15:58:28 2020年8月3日 星期一 

接驳盒执行通道2关闭！

------------------------------------


Log Entry : 15:58:33 2020年8月3日 星期一 

接驳盒执行通道2关闭失败！

------------------------------------


Log Entry : 15:58:35 2020年8月3日 星期一 

接驳盒执行通道2关闭！

------------------------------------


Log Entry : 15:58:38 2020年8月3日 星期一 

接驳盒执行通道2关闭成功！

------------------------------------


Log Entry : 13:45:52 2020年8月4日 星期二 

通道1电压电流上下限设置成功！

------------------------------------


Log Entry : 13:46:07 2020年8月4日 星期二 

通道1电压电流上下限设置成功！

------------------------------------


Log Entry : 13:46:43 2020年8月4日 星期二 

通道2电压电流上下限设置失败！

------------------------------------


Log Entry : 13:47:31 2020年8月4日 星期二 

通道2电压电流上下限设置成功！

------------------------------------


Log Entry : 13:47:38 2020年8月4日 星期二 

通道3电压电流上下限设置成功！

------------------------------------


Log Entry : 13:47:44 2020年8月4日 星期二 

通道4电压电流上下限设置成功！

------------------------------------


Log Entry : 13:47:49 2020年8月4日 星期二 

通道5电压电流上下限设置成功！

------------------------------------


Log Entry : 13:49:09 2020年8月4日 星期二 

A舱温度上下限设置成功！

------------------------------------


Log Entry : 13:50:17 2020年8月4日 星期二 

A舱通道2电压电流上下限设置失败！

------------------------------------


Log Entry : 13:50:30 2020年8月4日 星期二 

通道1电压电流上下限设置成功！

------------------------------------


Log Entry : 13:51:20 2020年8月4日 星期二 

通道2电压电流上下限设置成功！

------------------------------------


Log Entry : 13:52:01 2020年8月4日 星期二 

通道2电压电流上下限设置成功！

------------------------------------


Log Entry : 13:52:33 2020年8月4日 星期二 

通道3电压电流上下限设置成功！

------------------------------------


Log Entry : 13:54:34 2020年8月4日 星期二 

通道4电压电流上下限设置成功！

------------------------------------


Log Entry : 13:55:15 2020年8月4日 星期二 

通道5电压电流上下限设置成功！

------------------------------------


Log Entry : 13:56:00 2020年8月4日 星期二 

A舱温度上下限设置成功！

------------------------------------


Log Entry : 14:03:56 2020年8月4日 星期二 

设置时间间隔执行成功！

------------------------------------


Log Entry : 14:06:33 2020年7月4日 星期六 

校时指令执行成功！

------------------------------------


Log Entry : 14:07:46 2020年8月4日 星期二 

校时指令执行成功！

------------------------------------


Log Entry : 16:07:15 2020年8月4日 星期二 

接驳盒通道1打开！

------------------------------------


Log Entry : 16:07:19 2020年8月4日 星期二 

接驳盒执行通道1打开成功！

------------------------------------


Log Entry : 16:36:28 2020年8月4日 星期二 

接驳盒执行通道5打开！

------------------------------------


Log Entry : 16:36:34 2020年8月4日 星期二 

接驳盒执行通道5打开成功！

------------------------------------


Log Entry : 16:40:06 2020年8月4日 星期二 

接驳盒执行通道5打开！

------------------------------------


Log Entry : 16:40:10 2020年8月4日 星期二 

接驳盒执行通道5打开成功！

------------------------------------


Log Entry : 16:41:03 2020年8月4日 星期二 

接驳盒执行通道5打开！

------------------------------------


Log Entry : 16:41:11 2020年8月4日 星期二 

接驳盒执行通道5打开成功！

------------------------------------


Log Entry : 16:38:19 2020年8月6日 星期四 

执行通道1打开！

------------------------------------


Log Entry : 16:38:21 2020年8月6日 星期四 

执行通道1打开失败！

------------------------------------


Log Entry : 16:51:34 2020年8月6日 星期四 

执行通道1打开！

------------------------------------


Log Entry : 16:51:37 2020年8月6日 星期四 

执行通道1打开失败！

------------------------------------


Log Entry : 16:57:46 2020年8月6日 星期四 

执行通道1打开！

------------------------------------


Log Entry : 16:57:49 2020年8月6日 星期四 

执行通道1打开失败！

------------------------------------


Log Entry : 13:29:51 2020年8月7日 星期五 

执行通道1打开！

------------------------------------


Log Entry : 13:30:00 2020年8月7日 星期五 

执行通道1打开失败！

------------------------------------


Log Entry : 13:30:11 2020年8月7日 星期五 

执行通道1打开！

------------------------------------


Log Entry : 13:30:14 2020年8月7日 星期五 

执行通道1打开失败！

------------------------------------


Log Entry : 13:32:49 2020年8月7日 星期五 

执行通道1打开！

------------------------------------


Log Entry : 13:34:19 2020年8月7日 星期五 

执行通道1打开失败！

------------------------------------


Log Entry : 13:34:19 2020年8月7日 星期五 

执行通道1打开！

------------------------------------


Log Entry : 13:34:30 2020年8月7日 星期五 

执行通道1打开失败！

------------------------------------


Log Entry : 13:35:11 2020年8月7日 星期五 

执行通道1打开！

------------------------------------


Log Entry : 13:39:28 2020年8月7日 星期五 

执行通道1打开！

------------------------------------


Log Entry : 13:41:35 2020年8月7日 星期五 

执行通道1打开！

------------------------------------


Log Entry : 13:42:56 2020年8月7日 星期五 

接驳盒通道1打开！

------------------------------------


Log Entry : 13:43:02 2020年8月7日 星期五 

执行通道1打开！

------------------------------------


Log Entry : 13:43:47 2020年8月7日 星期五 

执行通道1打开失败！

------------------------------------


Log Entry : 13:44:50 2020年8月7日 星期五 

执行通道1打开！

------------------------------------


Log Entry : 13:45:00 2020年8月7日 星期五 

执行通道1打开失败！

------------------------------------


Log Entry : 13:45:01 2020年8月7日 星期五 

执行通道1打开！

------------------------------------


Log Entry : 13:45:03 2020年8月7日 星期五 

执行通道1打开失败！

------------------------------------


Log Entry : 13:45:04 2020年8月7日 星期五 

执行通道1打开！

------------------------------------


Log Entry : 13:45:06 2020年8月7日 星期五 

执行通道1打开失败！

------------------------------------


Log Entry : 13:46:35 2020年8月7日 星期五 

执行通道1打开！

------------------------------------


Log Entry : 13:46:54 2020年8月7日 星期五 

执行通道1打开失败！

------------------------------------


Log Entry : 13:46:58 2020年8月7日 星期五 

执行通道1打开！

------------------------------------


Log Entry : 13:47:48 2020年8月7日 星期五 

执行通道1打开！

------------------------------------


Log Entry : 13:48:48 2020年8月7日 星期五 

执行通道1打开失败！

------------------------------------


Log Entry : 13:48:50 2020年8月7日 星期五 

执行通道1打开！

------------------------------------


Log Entry : 13:48:54 2020年8月7日 星期五 

执行通道1打开失败！

------------------------------------


Log Entry : 13:48:54 2020年8月7日 星期五 

执行通道1打开！

------------------------------------


Log Entry : 13:48:56 2020年8月7日 星期五 

执行通道1打开失败！

------------------------------------


Log Entry : 13:48:57 2020年8月7日 星期五 

执行通道1打开！

------------------------------------


Log Entry : 13:48:58 2020年8月7日 星期五 

执行通道1打开失败！

------------------------------------


Log Entry : 13:50:04 2020年8月7日 星期五 

执行通道1打开！

------------------------------------


Log Entry : 13:51:56 2020年8月7日 星期五 

执行通道1打开！

------------------------------------


Log Entry : 13:53:46 2020年8月7日 星期五 

执行通道1打开失败！

------------------------------------


Log Entry : 13:53:47 2020年8月7日 星期五 

执行通道1打开！

------------------------------------


Log Entry : 13:54:57 2020年8月7日 星期五 

执行通道1打开失败！

------------------------------------


Log Entry : 13:55:00 2020年8月7日 星期五 

执行通道1打开！

------------------------------------


Log Entry : 13:55:32 2020年8月7日 星期五 

执行通道1打开失败！

------------------------------------


Log Entry : 13:55:44 2020年8月7日 星期五 

执行通道1打开！

------------------------------------


Log Entry : 13:55:50 2020年8月7日 星期五 

执行通道1打开失败！

------------------------------------


Log Entry : 13:55:52 2020年8月7日 星期五 

执行通道1打开！

------------------------------------


Log Entry : 13:55:54 2020年8月7日 星期五 

执行通道1打开失败！

------------------------------------


Log Entry : 13:55:59 2020年8月7日 星期五 

执行通道1打开！

------------------------------------


Log Entry : 13:56:10 2020年8月7日 星期五 

执行通道1打开失败！

------------------------------------


Log Entry : 13:58:32 2020年8月7日 星期五 

执行通道1打开！

------------------------------------


Log Entry : 13:58:35 2020年8月7日 星期五 

执行通道1打开失败！

------------------------------------


Log Entry : 13:59:15 2020年8月7日 星期五 

执行通道1打开！

------------------------------------


Log Entry : 14:04:02 2020年8月7日 星期五 

执行通道1打开！

------------------------------------


Log Entry : 14:04:47 2020年8月7日 星期五 

执行通道1打开失败！

------------------------------------


Log Entry : 14:04:49 2020年8月7日 星期五 

执行通道1打开！

------------------------------------


Log Entry : 14:05:18 2020年8月7日 星期五 

执行通道1打开失败！

------------------------------------


Log Entry : 14:05:18 2020年8月7日 星期五 

执行通道1打开！

------------------------------------


Log Entry : 14:05:43 2020年8月7日 星期五 

执行通道1打开！

------------------------------------


Log Entry : 14:34:57 2020年8月7日 星期五 

执行通道1打开！

------------------------------------


Log Entry : 15:16:19 2020年8月7日 星期五 

执行通道1打开！

------------------------------------


Log Entry : 15:16:37 2020年8月7日 星期五 

执行通道1打开成功！

------------------------------------


Log Entry : 15:16:50 2020年8月7日 星期五 

执行通道1打开！

------------------------------------


Log Entry : 15:16:52 2020年8月7日 星期五 

执行通道1打开成功！

------------------------------------


Log Entry : 15:18:02 2020年8月7日 星期五 

执行通道1打开！

------------------------------------


Log Entry : 15:18:04 2020年8月7日 星期五 

执行通道1打开成功！

------------------------------------


Log Entry : 15:19:04 2020年8月7日 星期五 

执行通道1打开！

------------------------------------


Log Entry : 15:19:07 2020年8月7日 星期五 

执行通道1打开成功！

------------------------------------


Log Entry : 15:52:11 2020年8月7日 星期五 

接驳盒通道1打开！

------------------------------------


Log Entry : 15:52:19 2020年8月7日 星期五 

执行通道1打开！

------------------------------------


Log Entry : 15:52:21 2020年8月7日 星期五 

执行通道1打开成功！

------------------------------------


Log Entry : 15:52:36 2020年8月7日 星期五 

执行通道2打开！

------------------------------------


Log Entry : 15:52:43 2020年8月7日 星期五 

执行通道2打开失败！

------------------------------------


Log Entry : 15:59:18 2020年8月7日 星期五 

执行通道1打开！

------------------------------------


Log Entry : 15:59:22 2020年8月7日 星期五 

执行通道1打开失败！

------------------------------------


Log Entry : 15:59:29 2020年8月7日 星期五 

执行通道1打开！

------------------------------------


Log Entry : 15:59:31 2020年8月7日 星期五 

执行通道1打开成功！

------------------------------------


Log Entry : 16:00:08 2020年8月7日 星期五 

执行通道2打开！

------------------------------------


Log Entry : 16:00:10 2020年8月7日 星期五 

执行通道2打开成功！

------------------------------------


Log Entry : 16:00:25 2020年8月7日 星期五 

执行通道3打开！

------------------------------------


Log Entry : 16:00:27 2020年8月7日 星期五 

执行通道3打开成功！

------------------------------------


Log Entry : 16:01:06 2020年8月7日 星期五 

执行通道1打开！

------------------------------------


Log Entry : 16:01:08 2020年8月7日 星期五 

执行通道1打开成功！

------------------------------------


Log Entry : 16:01:21 2020年8月7日 星期五 

执行通道2打开！

------------------------------------


Log Entry : 16:01:23 2020年8月7日 星期五 

执行通道2打开成功！

------------------------------------


Log Entry : 16:01:30 2020年8月7日 星期五 

执行通道3打开！

------------------------------------


Log Entry : 16:01:37 2020年8月7日 星期五 

执行通道3打开失败！

------------------------------------


Log Entry : 16:01:41 2020年8月7日 星期五 

执行通道3打开！

------------------------------------


Log Entry : 16:01:48 2020年8月7日 星期五 

执行通道3打开失败！

------------------------------------


Log Entry : 16:08:10 2020年8月7日 星期五 

执行通道1打开！

------------------------------------


Log Entry : 16:08:12 2020年8月7日 星期五 

执行通道1打开成功！

------------------------------------


Log Entry : 16:08:19 2020年8月7日 星期五 

执行通道2打开！

------------------------------------


Log Entry : 16:08:21 2020年8月7日 星期五 

执行通道2打开成功！

------------------------------------


Log Entry : 16:08:30 2020年8月7日 星期五 

执行通道3打开！

------------------------------------


Log Entry : 16:08:32 2020年8月7日 星期五 

执行通道3打开成功！

------------------------------------


Log Entry : 16:08:39 2020年8月7日 星期五 

执行通道4打开！

------------------------------------


Log Entry : 16:08:46 2020年8月7日 星期五 

执行通道4打开失败！

------------------------------------


Log Entry : 16:09:31 2020年8月7日 星期五 

执行通道4打开！

------------------------------------


Log Entry : 16:09:43 2020年8月7日 星期五 

执行通道4打开失败！

------------------------------------


Log Entry : 16:09:46 2020年8月7日 星期五 

执行通道4打开！

------------------------------------


Log Entry : 16:09:53 2020年8月7日 星期五 

执行通道4打开失败！

------------------------------------


Log Entry : 16:10:25 2020年8月7日 星期五 

执行通道4打开！

------------------------------------


Log Entry : 16:10:55 2020年8月7日 星期五 

执行通道4打开失败！

------------------------------------


Log Entry : 16:10:59 2020年8月7日 星期五 

执行通道4打开！

------------------------------------


Log Entry : 16:12:22 2020年8月7日 星期五 

执行通道4打开！

------------------------------------


Log Entry : 16:12:36 2020年8月7日 星期五 

执行通道4打开成功！

------------------------------------


Log Entry : 16:13:03 2020年8月7日 星期五 

执行通道5打开！

------------------------------------


Log Entry : 16:13:05 2020年8月7日 星期五 

执行通道5打开成功！

------------------------------------


Log Entry : 16:13:14 2020年8月7日 星期五 

执行通道1打开！

------------------------------------


Log Entry : 16:13:18 2020年8月7日 星期五 

执行通道1打开成功！

------------------------------------


Log Entry : 16:13:27 2020年8月7日 星期五 

执行通道2打开！

------------------------------------


Log Entry : 16:13:29 2020年8月7日 星期五 

执行通道2打开成功！

------------------------------------


Log Entry : 16:13:36 2020年8月7日 星期五 

执行通道3打开！

------------------------------------


Log Entry : 16:13:38 2020年8月7日 星期五 

执行通道3打开成功！

------------------------------------


Log Entry : 16:14:19 2020年8月7日 星期五 

执行通道1关闭！

------------------------------------


Log Entry : 16:14:21 2020年8月7日 星期五 

执行通道1关闭成功！

------------------------------------


Log Entry : 16:14:52 2020年8月7日 星期五 

执行通道2关闭！

------------------------------------


Log Entry : 16:14:53 2020年8月7日 星期五 

执行通道2关闭成功！

------------------------------------


Log Entry : 16:15:10 2020年8月7日 星期五 

执行通道3关闭！

------------------------------------


Log Entry : 16:15:12 2020年8月7日 星期五 

执行通道3关闭成功！

------------------------------------


Log Entry : 16:15:26 2020年8月7日 星期五 

执行通道4关闭！

------------------------------------


Log Entry : 16:15:28 2020年8月7日 星期五 

执行通道4关闭成功！

------------------------------------


Log Entry : 16:15:32 2020年8月7日 星期五 

执行通道5关闭！

------------------------------------


Log Entry : 16:15:34 2020年8月7日 星期五 

执行通道5关闭成功！

------------------------------------


Log Entry : 16:39:47 2020年8月7日 星期五 

执行校时指令成功！

------------------------------------


Log Entry : 16:39:53 2020年8月7日 星期五 

执行校时指令成功！

------------------------------------


Log Entry : 09:35:28 2020年8月10日 星期一 

执行校时指令成功！

------------------------------------


Log Entry : 10:01:43 2020年8月10日 星期一 

执行设置通道1报警阈值，电流上限:04.000电流下限:00.001电压上限:14.000电压下限:11.000

------------------------------------


Log Entry : 10:02:15 2020年8月10日 星期一 

执行设置通道1报警阈值失败！

------------------------------------


Log Entry : 10:04:53 2020年8月10日 星期一 

执行设置通道1报警阈值，电流上限:04.000电流下限:00.001电压上限:14.000电压下限:11.000

------------------------------------


Log Entry : 10:05:02 2020年8月10日 星期一 

执行设置通道1报警阈值失败！

------------------------------------


Log Entry : 10:05:37 2020年8月10日 星期一 

执行设置通道1报警阈值，电流上限:04.000电流下限:00.001电压上限:14.000电压下限:11.000

------------------------------------


Log Entry : 10:06:07 2020年8月10日 星期一 

执行设置通道1报警阈值失败！

------------------------------------


Log Entry : 10:06:11 2020年8月10日 星期一 

执行设置通道1报警阈值，电流上限:04.000电流下限:00.001电压上限:14.000电压下限:11.000

------------------------------------


Log Entry : 10:06:37 2020年8月10日 星期一 

执行设置通道1报警阈值失败！

------------------------------------


Log Entry : 10:06:42 2020年8月10日 星期一 

执行设置通道1报警阈值，电流上限:04.000电流下限:00.001电压上限:14.000电压下限:11.000

------------------------------------


Log Entry : 10:08:00 2020年8月10日 星期一 

执行设置通道1报警阈值，电流上限:04.000电流下限:00.001电压上限:14.000电压下限:11.000

------------------------------------


Log Entry : 10:08:19 2020年8月10日 星期一 

执行设置通道1报警阈值成功！

------------------------------------


Log Entry : 10:23:37 2020年8月10日 星期一 

执行设置通道1报警阈值，电流上限:04.000电流下限:00.001电压上限:14.000电压下限:11.000

------------------------------------


Log Entry : 10:23:39 2020年8月10日 星期一 

执行设置通道1报警阈值成功！

------------------------------------


Log Entry : 10:23:44 2020年8月10日 星期一 

执行设置通道2报警阈值，电流上限:01.000电流下限:00.000电压上限:26.000电压下限:23.000

------------------------------------


Log Entry : 10:23:46 2020年8月10日 星期一 

执行设置通道2报警阈值成功！

------------------------------------


Log Entry : 10:23:51 2020年8月10日 星期一 

执行设置通道3报警阈值，电流上限:01.000电流下限:00.000电压上限:13.000电压下限:11.000

------------------------------------


Log Entry : 10:23:52 2020年8月10日 星期一 

执行设置通道3报警阈值成功！

------------------------------------


Log Entry : 10:23:57 2020年8月10日 星期一 

执行设置通道4报警阈值，电流上限:01.000电流下限:00.000电压上限:13.000电压下限:11.000

------------------------------------


Log Entry : 10:23:59 2020年8月10日 星期一 

执行设置通道4报警阈值成功！

------------------------------------


Log Entry : 10:24:04 2020年8月10日 星期一 

执行设置通道5报警阈值，电流上限:01.000电流下限:00.000电压上限:13.000电压下限:11.000

------------------------------------


Log Entry : 10:24:06 2020年8月10日 星期一 

执行设置通道5报警阈值成功！

------------------------------------


Log Entry : 10:31:36 2020年8月10日 星期一 

执行设置温度报警阈值，温度上限:80.000温度下限:05.000

------------------------------------


Log Entry : 10:31:38 2020年8月10日 星期一 

执行设置温度报警阈值成功！

------------------------------------


Log Entry : 10:34:52 2020年8月10日 星期一 

执行设置温度报警阈值，温度上限:80.000温度下限:05.000

------------------------------------


Log Entry : 10:34:55 2020年8月10日 星期一 

执行设置温度报警阈值成功！

------------------------------------


Log Entry : 10:36:13 2020年8月10日 星期一 

执行设置通道1报警阈值，电流上限:01.000电流下限:00.000电压上限:13.000电压下限:11.000

------------------------------------


Log Entry : 10:36:16 2020年8月10日 星期一 

执行设置通道1报警阈值成功！

------------------------------------


Log Entry : 10:36:20 2020年8月10日 星期一 

执行设置通道2报警阈值，电流上限:01.000电流下限:00.000电压上限:26.000电压下限:23.000

------------------------------------


Log Entry : 10:36:22 2020年8月10日 星期一 

执行设置通道2报警阈值成功！

------------------------------------


Log Entry : 10:36:26 2020年8月10日 星期一 

执行设置通道3报警阈值，电流上限:01.000电流下限:00.000电压上限:13.000电压下限:11.000

------------------------------------


Log Entry : 10:36:29 2020年8月10日 星期一 

执行设置通道3报警阈值成功！

------------------------------------


Log Entry : 10:36:33 2020年8月10日 星期一 

执行设置通道4报警阈值，电流上限:01.000电流下限:00.000电压上限:13.000电压下限:11.000

------------------------------------


Log Entry : 10:36:35 2020年8月10日 星期一 

执行设置通道4报警阈值成功！

------------------------------------


Log Entry : 10:36:39 2020年8月10日 星期一 

执行设置通道5报警阈值，电流上限:01.000电流下限:00.000电压上限:13.000电压下限:11.000

------------------------------------


Log Entry : 10:36:41 2020年8月10日 星期一 

执行设置通道5报警阈值成功！

------------------------------------


Log Entry : 13:27:40 2020年8月10日 星期一 

执行设置AD板时间间隔：0020

------------------------------------


Log Entry : 13:27:51 2020年8月10日 星期一 

执行设置AD板时间间隔成功！

------------------------------------


Log Entry : 13:27:52 2020年8月10日 星期一 

执行设置AD板时间间隔：0020

------------------------------------


Log Entry : 13:28:02 2020年8月10日 星期一 

执行设置AD板时间间隔失败！

------------------------------------


Log Entry : 13:28:03 2020年8月10日 星期一 

执行设置AD板时间间隔：0020

------------------------------------


Log Entry : 13:28:05 2020年8月10日 星期一 

执行设置AD板时间间隔成功！

------------------------------------


Log Entry : 13:29:53 2020年8月10日 星期一 

执行设置AD板时间间隔：0020

------------------------------------


Log Entry : 13:29:55 2020年8月10日 星期一 

执行设置AD板时间间隔成功！

------------------------------------


Log Entry : 13:29:58 2020年8月10日 星期一 

执行设置AD板时间间隔：0020

------------------------------------


Log Entry : 13:30:00 2020年8月10日 星期一 

执行设置AD板时间间隔成功！

------------------------------------


Log Entry : 13:49:13 2020年8月10日 星期一 

执行校时指令成功！

------------------------------------


Log Entry : 13:49:45 2020年8月10日 星期一 

执行通道1打开！

------------------------------------


Log Entry : 13:49:48 2020年8月10日 星期一 

执行通道1打开成功！

------------------------------------


Log Entry : 13:39:00 2020年8月17日 星期一 

接驳盒通道1打开！

------------------------------------


Log Entry : 13:39:08 2020年8月17日 星期一 

接驳盒执行通道1打开失败！

------------------------------------


Log Entry : 13:39:09 2020年8月17日 星期一 

接驳盒执行通道2打开！

------------------------------------


Log Entry : 13:39:17 2020年8月17日 星期一 

接驳盒执行通道2打开失败！

------------------------------------


Log Entry : 13:39:20 2020年8月17日 星期一 

接驳盒执行通道3打开！

------------------------------------


Log Entry : 13:40:48 2020年8月17日 星期一 

接驳盒执行通道3打开失败！

------------------------------------


Log Entry : 13:40:48 2020年8月17日 星期一 

接驳盒通道1打开！

------------------------------------


Log Entry : 13:40:55 2020年8月17日 星期一 

接驳盒执行通道1打开失败！

------------------------------------


Log Entry : 13:40:59 2020年8月17日 星期一 

接驳盒通道1打开！

------------------------------------


Log Entry : 13:41:08 2020年8月17日 星期一 

接驳盒执行通道1打开失败！

------------------------------------


Log Entry : 10:33:07 2020年8月18日 星期二 

接驳盒通道1打开！

------------------------------------


Log Entry : 11:00:26 2020年8月18日 星期二 

接驳盒通道1打开！

------------------------------------


Log Entry : 11:00:32 2020年8月18日 星期二 

接驳盒执行通道1打开失败！

------------------------------------


Log Entry : 11:00:57 2020年8月18日 星期二 

接驳盒通道1打开！

------------------------------------


Log Entry : 11:01:03 2020年8月18日 星期二 

接驳盒执行通道1打开失败！

------------------------------------


Log Entry : 11:15:11 2020年8月18日 星期二 

接驳盒通道1打开！

------------------------------------


Log Entry : 11:15:21 2020年8月18日 星期二 

接驳盒执行通道1打开成功！

------------------------------------


Log Entry : 11:16:02 2020年8月18日 星期二 

接驳盒执行通道2打开！

------------------------------------


Log Entry : 11:16:08 2020年8月18日 星期二 

接驳盒执行通道2打开成功！

------------------------------------


Log Entry : 11:16:12 2020年8月18日 星期二 

接驳盒执行通道3打开！

------------------------------------


Log Entry : 11:16:17 2020年8月18日 星期二 

接驳盒执行通道3打开成功！

------------------------------------


Log Entry : 11:16:23 2020年8月18日 星期二 

接驳盒执行通道4打开！

------------------------------------


Log Entry : 11:16:27 2020年8月18日 星期二 

接驳盒执行通道4打开成功！

------------------------------------


Log Entry : 11:16:28 2020年8月18日 星期二 

接驳盒执行通道5打开！

------------------------------------


Log Entry : 11:16:34 2020年8月18日 星期二 

接驳盒执行通道5打开成功！

------------------------------------


Log Entry : 11:17:03 2020年8月18日 星期二 

接驳盒执行通道2关闭！

------------------------------------


Log Entry : 11:17:08 2020年8月18日 星期二 

接驳盒执行通道2关闭成功！

------------------------------------


Log Entry : 11:17:13 2020年8月18日 星期二 

接驳盒执行通道3关闭！

------------------------------------


Log Entry : 11:17:19 2020年8月18日 星期二 

接驳盒执行通道3关闭失败！

------------------------------------


Log Entry : 11:17:27 2020年8月18日 星期二 

接驳盒执行通道3关闭！

------------------------------------


Log Entry : 11:17:31 2020年8月18日 星期二 

接驳盒执行通道3关闭成功！

------------------------------------


Log Entry : 11:17:36 2020年8月18日 星期二 

接驳盒执行通道4关闭！

------------------------------------


Log Entry : 11:17:40 2020年8月18日 星期二 

接驳盒执行通道4关闭成功！

------------------------------------


Log Entry : 11:17:45 2020年8月18日 星期二 

接驳盒执行通道5关闭！

------------------------------------


Log Entry : 11:17:49 2020年8月18日 星期二 

接驳盒执行通道5关闭成功！

------------------------------------


Log Entry : 11:19:22 2020年8月18日 星期二 

接驳盒通道1打开！

------------------------------------


Log Entry : 11:19:28 2020年8月18日 星期二 

接驳盒执行通道1打开失败！

------------------------------------


Log Entry : 11:29:05 2020年8月18日 星期二 

接驳盒通道1打开！

------------------------------------


Log Entry : 11:29:11 2020年8月18日 星期二 

接驳盒执行通道1打开失败！

------------------------------------


Log Entry : 11:30:50 2020年8月18日 星期二 

接驳盒通道1打开！

------------------------------------


Log Entry : 11:30:57 2020年8月18日 星期二 

接驳盒执行通道1打开失败！

------------------------------------


Log Entry : 11:31:23 2020年8月18日 星期二 

接驳盒通道1打开！

------------------------------------


Log Entry : 11:31:43 2020年8月18日 星期二 

接驳盒执行通道1打开失败！

------------------------------------


Log Entry : 13:34:07 2020年8月18日 星期二 

接驳盒通道1打开！

------------------------------------


Log Entry : 13:34:14 2020年8月18日 星期二 

接驳盒执行通道1打开失败！

------------------------------------


Log Entry : 13:34:20 2020年8月18日 星期二 

接驳盒执行通道2打开！

------------------------------------


Log Entry : 13:34:27 2020年8月18日 星期二 

接驳盒执行通道2打开失败！

------------------------------------


Log Entry : 13:34:29 2020年8月18日 星期二 

接驳盒执行通道3打开！

------------------------------------


Log Entry : 13:34:36 2020年8月18日 星期二 

接驳盒执行通道3打开失败！

------------------------------------


Log Entry : 13:34:43 2020年8月18日 星期二 

接驳盒执行通道4打开！

------------------------------------


Log Entry : 13:34:49 2020年8月18日 星期二 

接驳盒执行通道4打开失败！

------------------------------------


Log Entry : 13:34:50 2020年8月18日 星期二 

接驳盒执行通道5打开！

------------------------------------


Log Entry : 13:34:58 2020年8月18日 星期二 

接驳盒执行通道5打开失败！

------------------------------------


Log Entry : 13:35:07 2020年8月18日 星期二 

接驳盒执行通道5打开！

------------------------------------


Log Entry : 13:35:13 2020年8月18日 星期二 

接驳盒执行通道5打开失败！

------------------------------------


Log Entry : 13:35:22 2020年8月18日 星期二 

接驳盒执行通道5打开！

------------------------------------


Log Entry : 13:35:29 2020年8月18日 星期二 

接驳盒执行通道5打开失败！

------------------------------------


Log Entry : 13:35:54 2020年8月18日 星期二 

接驳盒通道1打开！

------------------------------------


Log Entry : 13:35:58 2020年8月18日 星期二 

接驳盒执行通道1打开成功！

------------------------------------


Log Entry : 13:36:04 2020年8月18日 星期二 

接驳盒执行通道2打开！

------------------------------------


Log Entry : 13:36:09 2020年8月18日 星期二 

接驳盒执行通道2打开成功！

------------------------------------


Log Entry : 13:36:14 2020年8月18日 星期二 

接驳盒执行通道3打开！

------------------------------------


Log Entry : 13:36:17 2020年8月18日 星期二 

接驳盒执行通道3打开成功！

------------------------------------


Log Entry : 13:36:26 2020年8月18日 星期二 

接驳盒执行通道4打开！

------------------------------------


Log Entry : 13:36:30 2020年8月18日 星期二 

接驳盒执行通道4打开成功！

------------------------------------


Log Entry : 13:36:35 2020年8月18日 星期二 

接驳盒执行通道5打开！

------------------------------------


Log Entry : 13:36:39 2020年8月18日 星期二 

接驳盒执行通道5打开成功！

------------------------------------


Log Entry : 13:36:46 2020年8月18日 星期二 

接驳盒执行通道1关闭！

------------------------------------


Log Entry : 13:36:52 2020年8月18日 星期二 

接驳盒执行通道1关闭失败！

------------------------------------


Log Entry : 13:36:53 2020年8月18日 星期二 

接驳盒执行通道2关闭！

------------------------------------


Log Entry : 13:37:00 2020年8月18日 星期二 

接驳盒执行通道2关闭失败！

------------------------------------


Log Entry : 13:37:00 2020年8月18日 星期二 

接驳盒执行通道3关闭！

------------------------------------


Log Entry : 13:37:11 2020年8月18日 星期二 

接驳盒执行通道3关闭失败！

------------------------------------


Log Entry : 13:37:12 2020年8月18日 星期二 

接驳盒执行通道4关闭！

------------------------------------


Log Entry : 13:37:19 2020年8月18日 星期二 

接驳盒执行通道4关闭失败！

------------------------------------


Log Entry : 13:37:20 2020年8月18日 星期二 

接驳盒执行通道5关闭！

------------------------------------


Log Entry : 13:37:27 2020年8月18日 星期二 

接驳盒执行通道5关闭失败！

------------------------------------


Log Entry : 13:40:16 2020年8月18日 星期二 

A舱通道2电压电流上下限设置失败！

------------------------------------


Log Entry : 13:43:28 2020年8月18日 星期二 

通道1电压电流上下限设置成功！

------------------------------------


Log Entry : 13:47:42 2020年8月18日 星期二 

通道2电压电流上下限设置成功！

------------------------------------


Log Entry : 13:47:49 2020年8月18日 星期二 

通道3电压电流上下限设置失败！

------------------------------------


Log Entry : 13:48:25 2020年8月18日 星期二 

A舱通道2电压电流上下限设置失败！

------------------------------------


Log Entry : 13:48:32 2020年8月18日 星期二 

通道2电压电流上下限设置失败！

------------------------------------


Log Entry : 13:48:40 2020年8月18日 星期二 

通道3电压电流上下限设置失败！

------------------------------------


Log Entry : 13:48:50 2020年8月18日 星期二 

通道4电压电流上下限设置失败！

------------------------------------


Log Entry : 13:51:02 2020年8月18日 星期二 

通道1电压电流上下限设置成功！

------------------------------------


Log Entry : 13:51:10 2020年8月18日 星期二 

通道2电压电流上下限设置成功！

------------------------------------


Log Entry : 13:51:17 2020年8月18日 星期二 

通道3电压电流上下限设置成功！

------------------------------------


Log Entry : 13:51:25 2020年8月18日 星期二 

通道4电压电流上下限设置成功！

------------------------------------


Log Entry : 13:51:32 2020年8月18日 星期二 

通道5电压电流上下限设置成功！

------------------------------------


Log Entry : 13:51:53 2020年8月18日 星期二 

A舱温度上下限设置成功！

------------------------------------


Log Entry : 14:44:54 2020年8月18日 星期二 

接驳盒通道1打开！

------------------------------------


Log Entry : 14:44:58 2020年8月18日 星期二 

接驳盒执行通道1打开成功！

------------------------------------


Log Entry : 14:20:00 2020年9月24日 星期四 

执行接驳盒执行通道3打开！

------------------------------------


Log Entry : 14:20:13 2020年9月24日 星期四 

接驳盒执行通道3打开失败！

------------------------------------


Log Entry : 14:24:32 2020年9月24日 星期四 

执行接驳盒执行通道5打开！

------------------------------------


Log Entry : 14:24:40 2020年9月24日 星期四 

接驳盒执行通道5打开失败！

------------------------------------


Log Entry : 14:24:42 2020年9月24日 星期四 

执行主接驳盒通道1打开！

------------------------------------


Log Entry : 14:24:54 2020年9月24日 星期四 

主接驳盒执行通道1打开失败！

------------------------------------


Log Entry : 14:24:57 2020年9月24日 星期四 

执行主接驳盒通道1打开！

------------------------------------


Log Entry : 14:25:12 2020年9月24日 星期四 

主接驳盒执行通道1打开失败！

------------------------------------


Log Entry : 14:25:32 2020年9月24日 星期四 

执行接驳盒执行通道5打开！

------------------------------------


Log Entry : 14:25:42 2020年9月24日 星期四 

接驳盒执行通道5打开失败！

------------------------------------


Log Entry : 14:25:44 2020年9月24日 星期四 

执行主接驳盒通道1打开！

------------------------------------


Log Entry : 14:25:52 2020年9月24日 星期四 

主接驳盒执行通道1打开失败！

------------------------------------


Log Entry : 14:25:54 2020年9月24日 星期四 

执行主接驳盒通道1打开！

------------------------------------


Log Entry : 14:26:02 2020年9月24日 星期四 

主接驳盒执行通道1打开失败！

------------------------------------


Log Entry : 10:00:24 2020年9月25日 星期五 

执行高压舱电源整体打开！

------------------------------------


Log Entry : 10:00:34 2020年9月25日 星期五 

高压舱电源整体打开失败！

------------------------------------


Log Entry : 10:01:00 2020年9月25日 星期五 

执行高压舱电源整体打开！

------------------------------------


Log Entry : 10:01:07 2020年9月25日 星期五 

高压舱电源整体打开失败！

------------------------------------


Log Entry : 10:01:34 2020年9月25日 星期五 

执行高压舱电源整体打开！

------------------------------------


Log Entry : 10:01:36 2020年9月25日 星期五 

高压舱电源整体打开成功！

------------------------------------


Log Entry : 10:02:19 2020年9月25日 星期五 

执行高压舱电源整体关机！

------------------------------------


Log Entry : 10:02:26 2020年9月25日 星期五 

高压舱电源整体关机失败！

------------------------------------


Log Entry : 10:02:28 2020年9月25日 星期五 

执行高压舱电源整体关机！

------------------------------------


Log Entry : 10:02:36 2020年9月25日 星期五 

高压舱电源整体关机失败！

------------------------------------


Log Entry : 10:02:42 2020年9月25日 星期五 

执行高压舱电源整体关机！

------------------------------------


Log Entry : 10:02:48 2020年9月25日 星期五 

高压舱电源整体关机失败！

------------------------------------


Log Entry : 10:03:03 2020年9月25日 星期五 

执行高压舱电源整体关机！

------------------------------------


Log Entry : 10:03:07 2020年9月25日 星期五 

高压舱电源整体关机成功！

------------------------------------


Log Entry : 10:04:54 2020年9月25日 星期五 

执行主接驳盒通道1打开！

------------------------------------


Log Entry : 10:05:04 2020年9月25日 星期五 

主接驳盒执行通道1打开失败！

------------------------------------


Log Entry : 10:05:24 2020年9月25日 星期五 

执行主接驳盒通道1打开！

------------------------------------


Log Entry : 10:05:28 2020年9月25日 星期五 

主接驳盒执行通道1打开成功！

------------------------------------


Log Entry : 10:05:52 2020年9月25日 星期五 

执行接驳盒执行通道1关闭！

------------------------------------


Log Entry : 10:05:53 2020年9月25日 星期五 

主接驳盒执行通道1关闭成功！

------------------------------------


Log Entry : 10:06:04 2020年9月25日 星期五 

执行接驳盒执行通道5打开！

------------------------------------


Log Entry : 10:06:11 2020年9月25日 星期五 

接驳盒执行通道5打开失败！

------------------------------------


Log Entry : 10:06:37 2020年9月25日 星期五 

执行接驳盒执行通道5打开！

------------------------------------


Log Entry : 10:06:51 2020年9月25日 星期五 

接驳盒执行通道5打开失败！

------------------------------------


Log Entry : 10:06:53 2020年9月25日 星期五 

执行接驳盒执行通道5打开！

------------------------------------


Log Entry : 10:07:05 2020年9月25日 星期五 

接驳盒执行通道5打开失败！

------------------------------------


Log Entry : 10:07:30 2020年9月25日 星期五 

执行主接驳盒通道2打开！

------------------------------------


Log Entry : 10:07:33 2020年9月25日 星期五 

主接驳盒执行通道2打开成功！

------------------------------------


Log Entry : 10:07:53 2020年9月25日 星期五 

执行接驳盒执行通道2关闭！

------------------------------------


Log Entry : 10:07:58 2020年9月25日 星期五 

主接驳盒执行通道2关闭成功！

------------------------------------


Log Entry : 10:08:11 2020年9月25日 星期五 

执行接驳盒执行通道5打开！

------------------------------------


Log Entry : 10:08:19 2020年9月25日 星期五 

接驳盒执行通道5打开失败！

------------------------------------


Log Entry : 10:08:20 2020年9月25日 星期五 

执行接驳盒执行通道4打开！

------------------------------------


Log Entry : 10:08:27 2020年9月25日 星期五 

接驳盒执行通道4打开失败！

------------------------------------


Log Entry : 10:08:55 2020年9月25日 星期五 

执行接驳盒执行通道5打开！

------------------------------------


Log Entry : 10:09:13 2020年9月25日 星期五 

执行接驳盒执行通道5打开！

------------------------------------


Log Entry : 10:09:38 2020年9月25日 星期五 

执行接驳盒执行通道5打开！

------------------------------------


Log Entry : 10:27:52 2020年9月25日 星期五 

执行接驳盒执行通道5打开！

------------------------------------


Log Entry : 10:27:58 2020年9月25日 星期五 

接驳盒执行通道5打开失败！

------------------------------------


Log Entry : 10:29:30 2020年9月25日 星期五 

执行接驳盒执行通道4打开！

------------------------------------


Log Entry : 10:29:41 2020年9月25日 星期五 

接驳盒执行通道4打开失败！

------------------------------------


Log Entry : 10:29:48 2020年9月25日 星期五 

执行高压舱电源整体打开！

------------------------------------


Log Entry : 10:29:55 2020年9月25日 星期五 

高压舱电源整体打开失败！

------------------------------------


Log Entry : 10:30:03 2020年9月25日 星期五 

执行高压舱电源整体打开！

------------------------------------


Log Entry : 10:30:05 2020年9月25日 星期五 

高压舱电源整体打开成功！

------------------------------------


Log Entry : 10:30:07 2020年9月25日 星期五 

执行高压舱电源整体关机！

------------------------------------


Log Entry : 10:30:27 2020年9月25日 星期五 

高压舱电源整体关机失败！

------------------------------------


Log Entry : 10:30:28 2020年9月25日 星期五 

执行高压舱电源整体关机！

------------------------------------


Log Entry : 10:30:32 2020年9月25日 星期五 

高压舱电源整体关机成功！

------------------------------------


Log Entry : 10:31:19 2020年9月25日 星期五 

执行主接驳盒通道1打开！

------------------------------------


Log Entry : 10:31:33 2020年9月25日 星期五 

主接驳盒执行通道1打开失败！

------------------------------------


Log Entry : 10:31:36 2020年9月25日 星期五 

执行主接驳盒通道1打开！

------------------------------------


Log Entry : 10:31:40 2020年9月25日 星期五 

主接驳盒执行通道1打开成功！

------------------------------------


Log Entry : 10:31:48 2020年9月25日 星期五 

执行接驳盒执行通道1关闭！

------------------------------------


Log Entry : 10:32:07 2020年9月25日 星期五 

主接驳盒执行通道1关闭失败！

------------------------------------


Log Entry : 10:32:09 2020年9月25日 星期五 

执行接驳盒执行通道1关闭！

------------------------------------


Log Entry : 10:32:12 2020年9月25日 星期五 

主接驳盒执行通道1关闭成功！

------------------------------------


Log Entry : 10:32:17 2020年9月25日 星期五 

执行主接驳盒通道2打开！

------------------------------------


Log Entry : 10:32:33 2020年9月25日 星期五 

主接驳盒执行通道2打开失败！

------------------------------------


Log Entry : 10:32:34 2020年9月25日 星期五 

执行主接驳盒通道2打开！

------------------------------------


Log Entry : 10:32:36 2020年9月25日 星期五 

主接驳盒通道2打开成功！

------------------------------------


Log Entry : 10:32:43 2020年9月25日 星期五 

执行接驳盒执行通道2关闭！

------------------------------------


Log Entry : 10:33:00 2020年9月25日 星期五 

主接驳盒执行通道2关闭失败！

------------------------------------


Log Entry : 10:33:01 2020年9月25日 星期五 

执行接驳盒执行通道2关闭！

------------------------------------


Log Entry : 10:33:03 2020年9月25日 星期五 

主接驳盒执行通道2关闭成功！

------------------------------------


Log Entry : 09:11:04 2020年10月8日 星期四 

执行主接驳盒通道1打开！

------------------------------------


Log Entry : 09:11:07 2020年10月8日 星期四 

主接驳盒通道1打开成功！

------------------------------------


Log Entry : 09:11:32 2020年10月8日 星期四 

执行接驳盒执行通道1关闭！

------------------------------------


Log Entry : 09:11:36 2020年10月8日 星期四 

主接驳盒执行通道1关闭成功！

------------------------------------


Log Entry : 09:12:14 2020年10月8日 星期四 

执行主接驳盒通道2打开！

------------------------------------


Log Entry : 09:12:18 2020年10月8日 星期四 

主接驳盒执行通道2打开成功！

------------------------------------


Log Entry : 09:12:36 2020年10月8日 星期四 

执行接驳盒执行通道2关闭！

------------------------------------


Log Entry : 09:12:38 2020年10月8日 星期四 

主接驳盒执行通道2关闭成功！

------------------------------------


Log Entry : 09:13:11 2020年10月8日 星期四 

执行高压舱电源整体打开！

------------------------------------


Log Entry : 09:13:15 2020年10月8日 星期四 

高压舱电源整体打开成功！

------------------------------------


Log Entry : 09:13:33 2020年10月8日 星期四 

执行高压舱电源整体关机！

------------------------------------


Log Entry : 09:13:37 2020年10月8日 星期四 

高压舱电源整体关机成功！

------------------------------------


Log Entry : 09:14:55 2020年10月8日 星期四 

执行接驳盒通道1打开！

------------------------------------


Log Entry : 09:14:57 2020年10月8日 星期四 

接驳盒通道1打开成功！

------------------------------------


Log Entry : 09:15:05 2020年10月8日 星期四 

执行接驳盒执行通道2打开！

------------------------------------


Log Entry : 09:15:07 2020年10月8日 星期四 

接驳盒执行通道2打开成功！

------------------------------------


Log Entry : 09:15:14 2020年10月8日 星期四 

执行接驳盒执行通道3打开！

------------------------------------


Log Entry : 09:15:29 2020年10月8日 星期四 

接驳盒执行通道3打开成功！

------------------------------------


Log Entry : 09:15:39 2020年10月8日 星期四 

执行接驳盒执行通道4打开！

------------------------------------


Log Entry : 09:15:41 2020年10月8日 星期四 

接驳盒执行通道4打开成功！

------------------------------------


Log Entry : 09:15:49 2020年10月8日 星期四 

执行接驳盒执行通道5打开！

------------------------------------


Log Entry : 09:15:51 2020年10月8日 星期四 

接驳盒执行通道5打开成功！

------------------------------------


Log Entry : 09:16:32 2020年10月8日 星期四 

执行接驳盒执行通道1关闭！

------------------------------------


Log Entry : 09:16:40 2020年10月8日 星期四 

接驳盒执行通道1关闭成功！

------------------------------------


Log Entry : 09:16:48 2020年10月8日 星期四 

执行接驳盒执行通道3关闭！

------------------------------------


Log Entry : 09:16:54 2020年10月8日 星期四 

接驳盒执行通道3关闭成功！

------------------------------------


Log Entry : 09:17:00 2020年10月8日 星期四 

执行接驳盒执行通道4关闭！

------------------------------------


Log Entry : 09:17:04 2020年10月8日 星期四 

接驳盒执行通道4关闭成功！

------------------------------------


Log Entry : 09:17:10 2020年10月8日 星期四 

执行接驳盒执行通道5关闭！

------------------------------------


Log Entry : 09:17:13 2020年10月8日 星期四 

接驳盒执行通道5关闭成功！

------------------------------------


Log Entry : 09:17:59 2020年10月8日 星期四 

通道1电压电流上下限设置成功！

------------------------------------


Log Entry : 09:18:05 2020年10月8日 星期四 

通道2电压电流上下限设置成功！

------------------------------------


Log Entry : 09:18:11 2020年10月8日 星期四 

通道3电压电流上下限设置成功！

------------------------------------


Log Entry : 09:18:21 2020年10月8日 星期四 

通道4电压电流上下限设置成功！

------------------------------------


Log Entry : 09:18:27 2020年10月8日 星期四 

通道5电压电流上下限设置成功！

------------------------------------


Log Entry : 09:18:41 2020年10月8日 星期四 

A舱温度上下限设置成功！

------------------------------------


Log Entry : 09:59:45 2020年10月8日 星期四 

执行通道1打开！

------------------------------------


Log Entry : 09:59:48 2020年10月8日 星期四 

执行通道1打开失败！

------------------------------------


Log Entry : 09:59:53 2020年10月8日 星期四 

执行通道1打开！

------------------------------------


Log Entry : 09:59:55 2020年10月8日 星期四 

执行通道1打开失败！

------------------------------------


Log Entry : 10:01:09 2020年10月8日 星期四 

执行通道1打开！

------------------------------------


Log Entry : 10:01:27 2020年10月8日 星期四 

执行通道1打开失败！

------------------------------------


Log Entry : 10:01:46 2020年10月8日 星期四 

执行设置通道1报警阈值，电流上限:01.000电流下限:00.000电压上限:13.000电压下限:11.000

------------------------------------


Log Entry : 10:04:27 2020年10月8日 星期四 

执行设置通道1报警阈值失败！

------------------------------------


Log Entry : 10:05:26 2020年10月8日 星期四 

执行接驳盒执行通道5打开！

------------------------------------


Log Entry : 10:05:43 2020年10月8日 星期四 

执行主接驳盒通道2打开！

------------------------------------


Log Entry : 10:05:45 2020年10月8日 星期四 

执行主接驳盒通道1打开！

------------------------------------


Log Entry : 15:39:43 2020年11月3日 星期二 

执行设置通道2报警阈值，电流上限:01.000电流下限:00.000电压上限:13.000电压下限:11.000

------------------------------------


Log Entry : 15:39:46 2020年11月3日 星期二 

执行设置通道2报警阈值失败！

------------------------------------


Log Entry : 15:39:52 2020年11月3日 星期二 

执行设置通道2报警阈值，电流上限:01.000电流下限:00.000电压上限:13.000电压下限:11.000

------------------------------------


Log Entry : 15:39:54 2020年11月3日 星期二 

执行设置通道2报警阈值失败！

------------------------------------


Log Entry : 15:01:12 2021年1月13日 星期三 

执行高压舱电源整体打开！

------------------------------------


Log Entry : 14:15:57 2021年1月14日 星期四 

执行高压舱电源整体打开！

------------------------------------


Log Entry : 14:16:09 2021年1月14日 星期四 

高压舱电源整体打开成功！

------------------------------------


Log Entry : 14:16:38 2021年1月14日 星期四 

执行高压舱电源整体打开！

------------------------------------


Log Entry : 14:16:43 2021年1月14日 星期四 

高压舱电源整体打开成功！

------------------------------------


Log Entry : 14:22:02 2021年1月14日 星期四 

执行高压舱电源整体打开！

------------------------------------


Log Entry : 14:22:09 2021年1月14日 星期四 

高压舱电源整体打开成功！

------------------------------------


Log Entry : 11:12:17 2021年1月25日 星期一 

执行高压舱电源整体打开！

------------------------------------


Log Entry : 11:12:29 2021年1月25日 星期一 

高压舱电源整体打开失败！

------------------------------------


Log Entry : 10:51:37 2021年2月22日 星期一 

执行接驳盒通道1打开！

------------------------------------


Log Entry : 10:51:47 2021年2月22日 星期一 

执行接驳盒通道1打开！

------------------------------------


Log Entry : 10:52:19 2021年2月22日 星期一 

接驳盒执行通道1打开失败！

------------------------------------


Log Entry : 10:52:21 2021年2月22日 星期一 

执行接驳盒通道1打开！

------------------------------------


Log Entry : 10:52:26 2021年2月22日 星期一 

接驳盒执行通道1打开成功！

------------------------------------


Log Entry : 10:52:40 2021年2月22日 星期一 

执行接驳盒执行通道2打开！

------------------------------------


Log Entry : 10:52:44 2021年2月22日 星期一 

接驳盒执行通道2打开成功！

------------------------------------


Log Entry : 10:53:04 2021年2月22日 星期一 

执行接驳盒执行通道3打开！

------------------------------------


Log Entry : 10:53:08 2021年2月22日 星期一 

接驳盒执行通道3打开成功！

------------------------------------


Log Entry : 10:53:17 2021年2月22日 星期一 

执行接驳盒执行通道4打开！

------------------------------------


Log Entry : 10:53:21 2021年2月22日 星期一 

接驳盒执行通道4打开成功！

------------------------------------


Log Entry : 10:53:29 2021年2月22日 星期一 

执行接驳盒执行通道5打开！

------------------------------------


Log Entry : 10:53:33 2021年2月22日 星期一 

接驳盒执行通道5打开成功！

------------------------------------


Log Entry : 10:54:28 2021年2月22日 星期一 

执行接驳盒执行通道1关闭！

------------------------------------


Log Entry : 10:54:32 2021年2月22日 星期一 

接驳盒执行通道1关闭成功！

------------------------------------


Log Entry : 10:54:42 2021年2月22日 星期一 

执行接驳盒执行通道2关闭！

------------------------------------


Log Entry : 10:54:44 2021年2月22日 星期一 

接驳盒执行通道2关闭成功！

------------------------------------


Log Entry : 10:54:52 2021年2月22日 星期一 

执行接驳盒执行通道3关闭！

------------------------------------


Log Entry : 10:54:54 2021年2月22日 星期一 

接驳盒执行通道3关闭成功！

------------------------------------


Log Entry : 10:55:01 2021年2月22日 星期一 

执行接驳盒执行通道4关闭！

------------------------------------


Log Entry : 10:55:03 2021年2月22日 星期一 

接驳盒执行通道4关闭成功！

------------------------------------


Log Entry : 10:55:08 2021年2月22日 星期一 

执行接驳盒执行通道5关闭！

------------------------------------


Log Entry : 10:55:12 2021年2月22日 星期一 

接驳盒执行通道5关闭成功！

------------------------------------


Log Entry : 11:01:53 2021年2月22日 星期一 

执行接驳盒通道1打开！

------------------------------------


Log Entry : 11:01:59 2021年2月22日 星期一 

执行接驳盒通道1打开！

------------------------------------


Log Entry : 11:02:09 2021年2月22日 星期一 

接驳盒执行通道1打开失败！

------------------------------------


Log Entry : 15:31:32 2021年2月22日 星期一 

A舱通道2电压电流上下限设置失败！

------------------------------------


Log Entry : 15:34:14 2021年2月22日 星期一 

通道1电压电流上下限设置成功！

------------------------------------


Log Entry : 15:35:00 2021年2月22日 星期一 

通道1电压电流上下限设置成功！

------------------------------------


Log Entry : 16:04:07 2021年2月22日 星期一 

A舱温度上下限设置成功！

------------------------------------


Log Entry : 09:23:49 2021年2月23日 星期二 

校时指令执行失败！

------------------------------------


Log Entry : 09:52:45 2021年2月23日 星期二 

通道1电压电流上下限设置成功！

------------------------------------


Log Entry : 09:58:22 2021年2月23日 星期二 

通道1电压电流上下限设置成功！

------------------------------------


Log Entry : 10:00:12 2021年2月23日 星期二 

通道1电压电流上下限设置成功！

------------------------------------


Log Entry : 10:00:42 2021年2月23日 星期二 

通道1电压电流上下限设置成功！

------------------------------------


Log Entry : 10:01:28 2021年2月23日 星期二 

A舱通道2电压电流上下限设置失败！

------------------------------------


Log Entry : 10:14:53 2021年2月23日 星期二 

次级接驳盒通道2电压电流上下限设置成功！

------------------------------------


Log Entry : 10:15:35 2021年2月23日 星期二 

次级接驳盒通道2电压电流上下限设置失败！

------------------------------------


Log Entry : 10:15:44 2021年2月23日 星期二 

次级接驳盒通道2电压电流上下限设置成功！

------------------------------------


Log Entry : 10:17:31 2021年2月23日 星期二 

次级接驳盒通道2电压电流上下限设置成功！

------------------------------------


Log Entry : 10:17:41 2021年2月23日 星期二 

次级接驳盒通道2电压电流上下限设置成功！

------------------------------------


Log Entry : 10:18:04 2021年2月23日 星期二 

次级接驳盒通道2电压电流上下限设置成功！

------------------------------------


Log Entry : 10:23:29 2021年2月23日 星期二 

次级接驳盒通道3电压电流上下限设置成功！

------------------------------------


Log Entry : 10:29:19 2021年2月23日 星期二 

次级接驳盒通道4电压电流上下限设置失败！

------------------------------------


Log Entry : 10:29:29 2021年2月23日 星期二 

次级接驳盒通道4电压电流上下限设置成功！

------------------------------------


Log Entry : 10:33:47 2021年2月23日 星期二 

次级接驳盒通道5电压电流上下限设置成功！

------------------------------------


Log Entry : 10:41:08 2021年2月23日 星期二 

次级接驳盒舱内温度上下限设置成功！

------------------------------------


Log Entry : 10:55:56 2021年2月23日 星期二 

A舱通道2电压电流上下限设置失败！

------------------------------------


Log Entry : 10:57:39 2021年2月23日 星期二 

执行设置数据采集器AD板时间间隔：0020

------------------------------------


Log Entry : 10:57:46 2021年2月23日 星期二 

执行设置数据采集器AD板时间间隔成功！

------------------------------------


Log Entry : 10:57:56 2021年2月23日 星期二 

执行设置数据采集器AD板时间间隔：0015

------------------------------------


Log Entry : 10:58:00 2021年2月23日 星期二 

执行设置数据采集器AD板时间间隔成功！

------------------------------------


Log Entry : 11:06:21 2021年2月23日 星期二 

执行设置数据采集器AD板时间间隔：0015

------------------------------------


Log Entry : 11:06:23 2021年2月23日 星期二 

执行设置数据采集器AD板时间间隔成功！

------------------------------------


Log Entry : 11:06:26 2021年2月23日 星期二 

执行设置数据采集器AD板时间间隔：0025

------------------------------------


Log Entry : 11:06:28 2021年2月23日 星期二 

执行设置数据采集器AD板时间间隔成功！

------------------------------------


Log Entry : 13:30:27 2021年2月23日 星期二 

执行设置数据采集器通道1报警阈值，电流上限:01.000电流下限:00.000电压上限:13.000电压下限:11.000

------------------------------------


Log Entry : 13:30:31 2021年2月23日 星期二 

执行设置数据采集器通道1报警阈值成功！

------------------------------------


Log Entry : 13:30:46 2021年2月23日 星期二 

执行设置数据采集器通道1报警阈值，电流上限:01.000电流下限:00.050电压上限:14.123电压下限:11.000

------------------------------------


Log Entry : 13:30:47 2021年2月23日 星期二 

执行设置数据采集器通道1报警阈值成功！

------------------------------------


Log Entry : 13:32:23 2021年2月23日 星期二 

执行设置数据采集器通道1报警阈值，电流上限:01.000电流下限:00.000电压上限:13.000电压下限:11.000

------------------------------------


Log Entry : 13:32:25 2021年2月23日 星期二 

执行设置数据采集器通道1报警阈值成功！

------------------------------------


Log Entry : 13:32:46 2021年2月23日 星期二 

执行设置数据采集器通道1报警阈值，电流上限:01.000电流下限:00.123电压上限:14.025电压下限:09.000

------------------------------------


Log Entry : 13:32:49 2021年2月23日 星期二 

执行设置数据采集器通道1报警阈值成功！

------------------------------------


Log Entry : 13:56:25 2021年2月23日 星期二 

执行设置数据采集器通道3报警阈值，电流上限:03.123电流下限:00.000电压上限:15.000电压下限:10.000

------------------------------------


Log Entry : 13:56:29 2021年2月23日 星期二 

执行设置数据采集器通道3报警阈值成功！

------------------------------------


Log Entry : 13:57:56 2021年2月23日 星期二 

执行设置数据采集器通道4报警阈值，电流上限:04.123电流下限:00.000电压上限:15.000电压下限:09.123

------------------------------------


Log Entry : 13:58:00 2021年2月23日 星期二 

执行设置数据采集器通道4报警阈值成功！

------------------------------------


Log Entry : 13:59:30 2021年2月23日 星期二 

执行设置数据采集器通道5报警阈值，电流上限:06.000电流下限:00.456电压上限:16.123电压下限:11.123

------------------------------------


Log Entry : 13:59:34 2021年2月23日 星期二 

执行设置数据采集器通道5报警阈值成功！

------------------------------------


Log Entry : 14:06:20 2021年2月23日 星期二 

执行设置数据采集器温度报警阈值，温度上限:80.123温度下限:00.000

------------------------------------


Log Entry : 14:06:24 2021年2月23日 星期二 

执行设置数据采集器温度报警阈值成功！

------------------------------------


Log Entry : 14:06:42 2021年2月23日 星期二 

执行设置数据采集器温度报警阈值，温度上限:80.123温度下限:02.123

------------------------------------


Log Entry : 14:06:44 2021年2月23日 星期二 

执行设置数据采集器温度报警阈值成功！

------------------------------------


Log Entry : 14:30:34 2021年2月23日 星期二 

次级接驳盒状态信息采样时间间隔设置失败！

------------------------------------


Log Entry : 14:31:24 2021年2月23日 星期二 

次级接驳盒状态信息采样时间间隔设置成功！

------------------------------------


Log Entry : 14:31:32 2021年2月23日 星期二 

次级接驳盒状态信息采样时间间隔设置成功！

------------------------------------


Log Entry : 09:44:56 2021年2月24日 星期三 

执行接驳盒通道1打开！

------------------------------------


Log Entry : 09:45:02 2021年2月24日 星期三 

接驳盒执行通道1打开失败！

------------------------------------


Log Entry : 09:45:03 2021年2月24日 星期三 

执行接驳盒执行通道2打开！

------------------------------------


Log Entry : 09:45:10 2021年2月24日 星期三 

接驳盒执行通道2打开失败！

------------------------------------


Log Entry : 09:45:11 2021年2月24日 星期三 

执行接驳盒执行通道3打开！

------------------------------------


Log Entry : 09:45:18 2021年2月24日 星期三 

接驳盒执行通道3打开失败！

------------------------------------


Log Entry : 09:45:20 2021年2月24日 星期三 

执行接驳盒执行通道3打开！

------------------------------------


Log Entry : 09:45:26 2021年2月24日 星期三 

接驳盒执行通道3打开失败！

------------------------------------


Log Entry : 09:45:45 2021年2月24日 星期三 

执行接驳盒执行通道4打开！

------------------------------------


Log Entry : 09:45:50 2021年2月24日 星期三 

执行接驳盒执行通道4打开！

------------------------------------


Log Entry : 09:45:55 2021年2月24日 星期三 

接驳盒执行通道4打开失败！

------------------------------------


Log Entry : 09:45:57 2021年2月24日 星期三 

执行接驳盒执行通道3打开！

------------------------------------


Log Entry : 09:46:03 2021年2月24日 星期三 

接驳盒执行通道3打开失败！

------------------------------------


Log Entry : 09:46:04 2021年2月24日 星期三 

执行接驳盒执行通道5打开！

------------------------------------


Log Entry : 09:46:11 2021年2月24日 星期三 

接驳盒执行通道5打开失败！

------------------------------------


Log Entry : 09:48:11 2021年2月24日 星期三 

执行接驳盒通道1打开！

------------------------------------


Log Entry : 09:48:13 2021年2月24日 星期三 

接驳盒通道1打开成功！

------------------------------------


Log Entry : 09:48:22 2021年2月24日 星期三 

执行接驳盒执行通道2打开！

------------------------------------


Log Entry : 09:48:24 2021年2月24日 星期三 

接驳盒执行通道2打开成功！

------------------------------------


Log Entry : 09:48:28 2021年2月24日 星期三 

执行接驳盒执行通道3打开！

------------------------------------


Log Entry : 09:48:30 2021年2月24日 星期三 

接驳盒执行通道3打开成功！

------------------------------------


Log Entry : 09:48:32 2021年2月24日 星期三 

执行接驳盒执行通道4打开！

------------------------------------


Log Entry : 09:48:39 2021年2月24日 星期三 

接驳盒执行通道4打开失败！

------------------------------------


Log Entry : 09:48:47 2021年2月24日 星期三 

执行接驳盒执行通道4打开！

------------------------------------


Log Entry : 09:48:49 2021年2月24日 星期三 

接驳盒执行通道4打开成功！

------------------------------------


Log Entry : 09:48:53 2021年2月24日 星期三 

执行接驳盒执行通道5打开！

------------------------------------


Log Entry : 09:48:55 2021年2月24日 星期三 

接驳盒执行通道5打开成功！

------------------------------------


Log Entry : 09:49:12 2021年2月24日 星期三 

执行接驳盒执行通道1关闭！

------------------------------------


Log Entry : 09:49:14 2021年2月24日 星期三 

接驳盒执行通道1关闭成功！

------------------------------------


Log Entry : 09:49:20 2021年2月24日 星期三 

执行接驳盒执行通道3关闭！

------------------------------------


Log Entry : 09:49:24 2021年2月24日 星期三 

接驳盒执行通道3关闭成功！

------------------------------------


Log Entry : 09:49:29 2021年2月24日 星期三 

执行接驳盒执行通道2关闭！

------------------------------------


Log Entry : 09:49:31 2021年2月24日 星期三 

接驳盒执行通道2关闭成功！

------------------------------------


Log Entry : 09:49:36 2021年2月24日 星期三 

执行接驳盒执行通道4关闭！

------------------------------------


Log Entry : 09:49:40 2021年2月24日 星期三 

接驳盒执行通道4关闭成功！

------------------------------------


Log Entry : 09:49:43 2021年2月24日 星期三 

执行接驳盒执行通道5关闭！

------------------------------------


Log Entry : 09:49:45 2021年2月24日 星期三 

接驳盒执行通道5关闭成功！

------------------------------------


Log Entry : 09:51:37 2021年2月24日 星期三 

次级接驳盒状态信息采样时间间隔设置成功！

------------------------------------


Log Entry : 09:54:07 2021年2月24日 星期三 

次级接驳盒舱内温度上下限设置成功！

------------------------------------


Log Entry : 09:54:42 2021年2月24日 星期三 

次级接驳盒通道1电压电流上下限设置成功！

------------------------------------


Log Entry : 09:55:02 2021年2月24日 星期三 

次级接驳盒通道2电压电流上下限设置成功！

------------------------------------


Log Entry : 09:55:28 2021年2月24日 星期三 

次级接驳盒通道3电压电流上下限设置成功！

------------------------------------


Log Entry : 09:55:50 2021年2月24日 星期三 

次级接驳盒通道3电压电流上下限设置成功！

------------------------------------


Log Entry : 09:56:07 2021年2月24日 星期三 

次级接驳盒通道4电压电流上下限设置成功！

------------------------------------


Log Entry : 09:56:25 2021年2月24日 星期三 

次级接驳盒通道5电压电流上下限设置成功！

------------------------------------


Log Entry : 10:06:57 2021年2月24日 星期三 

执行高压舱电源整体打开！

------------------------------------


Log Entry : 10:07:04 2021年2月24日 星期三 

高压舱电源整体打开失败！

------------------------------------


Log Entry : 10:10:03 2021年2月24日 星期三 

执行高压舱电源整体打开！

------------------------------------


Log Entry : 10:10:05 2021年2月24日 星期三 

高压舱电源整体打开成功！

------------------------------------


Log Entry : 10:11:02 2021年2月24日 星期三 

执行高压舱电源整体关机！

------------------------------------


Log Entry : 10:11:07 2021年2月24日 星期三 

高压舱电源整体关机成功！

------------------------------------


Log Entry : 10:14:17 2021年2月24日 星期三 

执行主接驳盒通道1打开！

------------------------------------


Log Entry : 10:14:21 2021年2月24日 星期三 

主接驳盒执行通道1打开成功！

------------------------------------


Log Entry : 10:14:45 2021年2月24日 星期三 

执行主接驳盒通道2打开！

------------------------------------


Log Entry : 10:14:49 2021年2月24日 星期三 

主接驳盒执行通道2打开成功！

------------------------------------


Log Entry : 10:15:06 2021年2月24日 星期三 

执行接驳盒执行通道1关闭！

------------------------------------


Log Entry : 10:15:10 2021年2月24日 星期三 

主接驳盒执行通道1关闭成功！

------------------------------------


Log Entry : 10:15:33 2021年2月24日 星期三 

执行接驳盒执行通道2关闭！

------------------------------------


Log Entry : 10:15:37 2021年2月24日 星期三 

主接驳盒执行通道2关闭成功！

------------------------------------


Log Entry : 11:27:25 2021年2月25日 星期四 

执行主接驳盒通道1打开！

------------------------------------


Log Entry : 11:27:29 2021年2月25日 星期四 

执行主接驳盒通道1打开！

------------------------------------


Log Entry : 11:27:36 2021年2月25日 星期四 

主接驳盒执行通道1打开失败！

------------------------------------


Log Entry : 11:29:19 2021年2月25日 星期四 

次级接驳盒通道1电压电流上下限设置失败！

------------------------------------


Log Entry : 11:29:28 2021年2月25日 星期四 

执行主接驳盒通道1打开！

------------------------------------


Log Entry : 11:29:34 2021年2月25日 星期四 

主接驳盒执行通道1打开失败！

------------------------------------


Log Entry : 11:29:43 2021年2月25日 星期四 

执行主接驳盒通道1打开！

------------------------------------


Log Entry : 11:29:49 2021年2月25日 星期四 

主接驳盒执行通道1打开失败！

------------------------------------


Log Entry : 11:34:19 2021年2月25日 星期四 

执行主接驳盒通道1打开！

------------------------------------


Log Entry : 11:34:26 2021年2月25日 星期四 

主接驳盒执行通道1打开成功！

------------------------------------


Log Entry : 13:10:40 2021年2月25日 星期四 

次级接驳盒通道1电压电流上下限设置失败！

------------------------------------


Log Entry : 13:12:41 2021年2月25日 星期四 

次级接驳盒通道1电压电流上下限设置成功！

------------------------------------


Log Entry : 13:13:00 2021年2月25日 星期四 

次级接驳盒通道2电压电流上下限设置成功！

------------------------------------


Log Entry : 13:13:16 2021年2月25日 星期四 

次级接驳盒通道3电压电流上下限设置成功！

------------------------------------


Log Entry : 13:13:23 2021年2月25日 星期四 

执行接驳盒执行通道1关闭！

------------------------------------


Log Entry : 13:13:32 2021年2月25日 星期四 

主接驳盒执行通道1关闭失败！

------------------------------------


Log Entry : 13:13:40 2021年2月25日 星期四 

执行接驳盒执行通道1关闭！

------------------------------------


Log Entry : 13:13:44 2021年2月25日 星期四 

主接驳盒执行通道1关闭成功！

------------------------------------


Log Entry : 13:58:20 2021年2月25日 

次级接驳盒通道1电压电流上下限设置失败！

------------------------------------


Log Entry : 13:58:34 2021年2月25日 

次级接驳盒通道1电压电流上下限设置失败！

------------------------------------


Log Entry : 14:20:25 2021年2月25日 

次级接驳盒通道1电压电流上下限设置失败！

------------------------------------


Log Entry : 14:21:54 2021年2月25日 

次级接驳盒通道1电压电流上下限设置失败！

------------------------------------


Log Entry : 16:35:43 2021年4月13日 星期二 

执行通道1打开！

------------------------------------


Log Entry : 16:36:01 2021年4月13日 星期二 

执行通道1打开失败！

------------------------------------


Log Entry : 16:24:02 2021年4月14日 星期三 

执行叶绿素浊度传感器转动清洁电刷指令失败！

------------------------------------


Log Entry : 16:24:23 2021年4月14日 星期三 

执行叶绿素浊度传感器转动清洁电刷指令失败！

------------------------------------


Log Entry : 16:29:10 2021年4月14日 星期三 

执行叶绿素浊度传感器转动清洁电刷指令失败！

------------------------------------


Log Entry : 16:33:26 2021年4月14日 星期三 

执行叶绿素浊度传感器转动清洁电刷指令失败！

------------------------------------


Log Entry : 16:33:35 2021年4月14日 星期三 

执行叶绿素浊度传感器转动清洁电刷指令失败！

------------------------------------


Log Entry : 16:40:27 2021年4月14日 星期三 

执行叶绿素浊度传感器转动清洁电刷指令失败！

------------------------------------


Log Entry : 16:47:58 2021年4月14日 星期三 

执行叶绿素浊度传感器转动清洁电刷指令失败！

------------------------------------


Log Entry : 16:48:37 2021年4月14日 星期三 

执行叶绿素浊度传感器转动清洁电刷指令失败！

------------------------------------


Log Entry : 16:49:00 2021年4月14日 星期三 

执行叶绿素浊度传感器转动清洁电刷指令失败！

------------------------------------


Log Entry : 16:49:41 2021年4月14日 星期三 

执行叶绿素浊度传感器转动清洁电刷指令失败！

------------------------------------


Log Entry : 09:30:19 2021年4月15日 星期四 

执行叶绿素浊度传感器转动清洁电刷指令失败！

------------------------------------


Log Entry : 09:32:43 2021年4月15日 星期四 

执行叶绿素浊度传感器转动清洁电刷指令失败！

------------------------------------


Log Entry : 09:32:50 2021年4月15日 星期四 

执行叶绿素浊度传感器转动清洁电刷指令失败！

------------------------------------


Log Entry : 09:32:56 2021年4月15日 星期四 

执行叶绿素浊度传感器转动清洁电刷指令失败！

------------------------------------


Log Entry : 09:33:49 2021年4月15日 星期四 

执行叶绿素浊度传感器转动清洁电刷指令失败！

------------------------------------


Log Entry : 09:36:47 2021年4月15日 星期四 

执行叶绿素浊度传感器转动清洁电刷指令失败！

------------------------------------


Log Entry : 09:37:16 2021年4月15日 星期四 

执行叶绿素浊度传感器转动清洁电刷指令失败！

------------------------------------


Log Entry : 09:37:55 2021年4月15日 星期四 

执行叶绿素浊度传感器转动清洁电刷指令失败！

------------------------------------


Log Entry : 09:39:23 2021年4月15日 星期四 

执行叶绿素浊度传感器转动清洁电刷指令失败！

------------------------------------


Log Entry : 09:40:19 2021年4月15日 星期四 

执行通道1打开！

------------------------------------


Log Entry : 09:40:22 2021年4月15日 星期四 

执行通道1打开失败！

------------------------------------


Log Entry : 09:40:38 2021年4月15日 星期四 

执行通道1打开！

------------------------------------


Log Entry : 09:40:43 2021年4月15日 星期四 

执行通道1打开成功！

------------------------------------


Log Entry : 09:40:49 2021年4月15日 星期四 

执行通道2打开！

------------------------------------


Log Entry : 09:40:52 2021年4月15日 星期四 

执行通道2打开成功！

------------------------------------


Log Entry : 09:40:57 2021年4月15日 星期四 

执行通道3打开！

------------------------------------


Log Entry : 09:41:06 2021年4月15日 星期四 

执行通道3打开失败！

------------------------------------


Log Entry : 09:44:20 2021年4月15日 星期四 

执行叶绿素浊度传感器转动清洁电刷指令失败！

------------------------------------


Log Entry : 09:59:55 2021年4月15日 星期四 

执行叶绿素浊度传感器转动清洁电刷指令失败！

------------------------------------


Log Entry : 10:07:17 2021年4月15日 星期四 

执行叶绿素浊度传感器转动清洁电刷指令成功！

------------------------------------


Log Entry : 10:08:25 2021年4月15日 星期四 

执行叶绿素浊度传感器转动清洁电刷指令成功！

------------------------------------


Log Entry : 13:55:20 2021年4月15日 星期四 

执行叶绿素浊度传感器急停指令成功！

------------------------------------


Log Entry : 13:55:27 2021年4月15日 星期四 

执行叶绿素浊度传感器急停指令成功！

------------------------------------


Log Entry : 13:55:44 2021年4月15日 星期四 

执行叶绿素浊度传感器急停指令成功！

------------------------------------


Log Entry : 10:32:45 2021年4月19日 星期一 

执行叶绿素浊度传感器转动清洁电刷指令失败！

------------------------------------


Log Entry : 10:32:48 2021年4月19日 星期一 

执行叶绿素浊度传感器急停指令失败！

------------------------------------


Log Entry : 15:25:07 2021年4月20日 星期二 

执行高压舱电源整体打开！

------------------------------------


Log Entry : 15:25:14 2021年4月20日 星期二 

高压舱电源整体打开失败！

------------------------------------


Log Entry : 15:25:15 2021年4月20日 星期二 

执行高压舱电源整体打开！

------------------------------------


Log Entry : 15:25:19 2021年4月20日 星期二 

高压舱电源整体打开成功！

------------------------------------


Log Entry : 15:25:24 2021年4月20日 星期二 

执行高压舱电源整体关机！

------------------------------------


Log Entry : 15:25:30 2021年4月20日 星期二 

高压舱电源整体关机失败！

------------------------------------


Log Entry : 15:26:23 2021年4月20日 星期二 

执行主接驳盒通道1打开！

------------------------------------


Log Entry : 15:26:26 2021年4月20日 星期二 

执行主接驳盒通道1打开！

------------------------------------


Log Entry : 15:26:30 2021年4月20日 星期二 

主接驳盒执行通道1打开成功！

------------------------------------


Log Entry : 15:26:32 2021年4月20日 星期二 

执行接驳盒执行通道1关闭！

------------------------------------


Log Entry : 15:27:03 2021年4月20日 星期二 

主接驳盒执行通道1关闭失败！

------------------------------------


Log Entry : 15:36:31 2021年4月20日 星期二 

执行接驳盒通道1打开！

------------------------------------


Log Entry : 15:36:37 2021年4月20日 星期二 

接驳盒执行通道1打开失败！

------------------------------------


Log Entry : 15:36:39 2021年4月20日 星期二 

执行接驳盒执行通道3打开！

------------------------------------


Log Entry : 15:36:45 2021年4月20日 星期二 

接驳盒执行通道3打开失败！

------------------------------------


Log Entry : 15:40:22 2021年4月20日 星期二 

执行通道1打开！

------------------------------------


Log Entry : 15:40:25 2021年4月20日 星期二 

执行通道1打开失败！

------------------------------------


Log Entry : 09:42:53 2021年4月21日 星期三 

执行通道1打开！

------------------------------------


Log Entry : 09:42:56 2021年4月21日 星期三 

执行通道1打开失败！

------------------------------------


Log Entry : 09:43:13 2021年4月21日 星期三 

执行通道1打开！

------------------------------------


Log Entry : 09:43:23 2021年4月21日 星期三 

执行通道1打开失败！

------------------------------------


Log Entry : 09:43:24 2021年4月21日 星期三 

执行通道2打开！

------------------------------------


Log Entry : 09:43:37 2021年4月21日 星期三 

执行通道2打开失败！

------------------------------------


Log Entry : 10:21:03 2021年4月21日 星期三 

执行多参数改变采样间隔指令！

------------------------------------


Log Entry : 15:40:34 2021年4月21日 星期三 

执行高压舱电源整体打开！

------------------------------------


Log Entry : 17:36:16 2021年6月21日 

执行接驳盒通道1打开！

------------------------------------


Log Entry : 17:36:20 2021年6月21日 

接驳盒通道1打开成功！

------------------------------------


Log Entry : 17:37:32 2021年6月21日 

执行通道3打开！

------------------------------------


Log Entry : 17:37:34 2021年6月21日 

执行通道3打开成功！

------------------------------------


Log Entry : 10:53:05 2021年6月22日 

执行接驳盒通道1打开！

------------------------------------


Log Entry : 10:53:07 2021年6月22日 

接驳盒通道1打开成功！

------------------------------------


Log Entry : 10:54:50 2021年6月22日 

执行通道4打开！

------------------------------------


Log Entry : 10:54:53 2021年6月22日 

执行通道4打开失败！

------------------------------------


Log Entry : 10:55:12 2021年6月22日 

执行通道4打开！

------------------------------------


Log Entry : 10:55:15 2021年6月22日 

执行通道4打开成功！

------------------------------------


Log Entry : 11:04:26 2021年6月22日 

执行接驳盒执行通道1关闭！

------------------------------------


Log Entry : 11:04:28 2021年6月22日 

接驳盒执行通道1关闭成功！

------------------------------------


Log Entry : 13:35:04 2021年6月22日 

执行叶绿素浊度传感器转动清洁电刷指令失败！

------------------------------------


Log Entry : 13:35:07 2021年6月22日 

执行叶绿素浊度传感器转动清洁电刷指令失败！

------------------------------------


Log Entry : 13:35:11 2021年6月22日 

执行叶绿素浊度传感器转动清洁电刷指令失败！

------------------------------------


Log Entry : 13:35:14 2021年6月22日 

执行叶绿素浊度传感器转动清洁电刷指令失败！

------------------------------------


Log Entry : 13:35:19 2021年6月22日 

执行叶绿素浊度传感器转动清洁电刷指令失败！

------------------------------------


Log Entry : 13:35:54 2021年6月22日 

执行叶绿素浊度传感器急停指令失败！

------------------------------------


Log Entry : 13:35:57 2021年6月22日 

执行叶绿素浊度传感器急停指令成功！

------------------------------------


Log Entry : 13:36:01 2021年6月22日 

执行叶绿素浊度传感器转动清洁电刷指令失败！

------------------------------------


Log Entry : 13:36:04 2021年6月22日 

执行叶绿素浊度传感器转动清洁电刷指令失败！

------------------------------------


Log Entry : 13:36:11 2021年6月22日 

执行叶绿素浊度传感器转动清洁电刷指令失败！

------------------------------------


Log Entry : 13:36:14 2021年6月22日 

执行叶绿素浊度传感器急停指令成功！

------------------------------------


Log Entry : 13:38:47 2021年6月22日 

执行叶绿素浊度传感器转动清洁电刷指令失败！

------------------------------------


Log Entry : 13:38:51 2021年6月22日 

执行叶绿素浊度传感器转动清洁电刷指令失败！

------------------------------------


Log Entry : 13:39:01 2021年6月22日 

执行叶绿素浊度传感器转动清洁电刷指令失败！

------------------------------------


Log Entry : 13:53:46 2021年6月22日 

执行叶绿素浊度传感器急停指令成功！

------------------------------------


Log Entry : 13:53:51 2021年6月22日 

执行叶绿素浊度传感器转动清洁电刷指令失败！

------------------------------------


Log Entry : 13:58:25 2021年6月22日 

执行叶绿素浊度传感器转动清洁电刷指令失败！

------------------------------------


Log Entry : 13:58:34 2021年6月22日 

执行叶绿素浊度传感器转动清洁电刷指令失败！

------------------------------------


Log Entry : 14:05:41 2021年6月22日 

执行叶绿素浊度传感器转动清洁电刷指令失败！

------------------------------------


Log Entry : 14:06:59 2021年6月22日 

执行叶绿素浊度传感器转动清洁电刷指令失败！

------------------------------------


Log Entry : 14:07:25 2021年6月22日 

执行叶绿素浊度传感器急停指令成功！

------------------------------------


Log Entry : 14:07:40 2021年6月22日 

执行叶绿素浊度传感器转动清洁电刷指令失败！

------------------------------------


Log Entry : 14:10:21 2021年6月22日 

执行叶绿素浊度传感器转动清洁电刷指令失败！

------------------------------------


Log Entry : 14:12:37 2021年6月22日 

执行叶绿素浊度传感器急停指令成功！

------------------------------------


Log Entry : 14:20:21 2021年6月22日 

执行叶绿素浊度传感器转动清洁电刷指令失败！

------------------------------------


Log Entry : 14:20:30 2021年6月22日 

执行叶绿素浊度传感器转动清洁电刷指令失败！

------------------------------------


Log Entry : 14:20:33 2021年6月22日 

执行叶绿素浊度传感器急停指令成功！

------------------------------------


Log Entry : 14:20:38 2021年6月22日 

执行叶绿素浊度传感器转动清洁电刷指令失败！

------------------------------------


Log Entry : 14:20:41 2021年6月22日 

执行叶绿素浊度传感器急停指令成功！

------------------------------------


Log Entry : 14:20:55 2021年6月22日 

执行叶绿素浊度传感器转动清洁电刷指令失败！

------------------------------------


Log Entry : 14:21:42 2021年6月22日 

执行叶绿素浊度传感器急停指令成功！

------------------------------------


Log Entry : 14:25:15 2021年6月22日 

执行叶绿素浊度传感器急停指令成功！

------------------------------------


Log Entry : 14:25:25 2021年6月22日 

执行叶绿素浊度传感器急停指令成功！

------------------------------------


Log Entry : 14:25:30 2021年6月22日 

执行叶绿素浊度传感器急停指令成功！

------------------------------------


Log Entry : 14:25:40 2021年6月22日 

执行叶绿素浊度传感器转动清洁电刷指令失败！

------------------------------------


Log Entry : 14:26:26 2021年6月22日 

执行叶绿素浊度传感器转动清洁电刷指令失败！

------------------------------------


Log Entry : 14:26:38 2021年6月22日 

执行叶绿素浊度传感器转动清洁电刷指令失败！

------------------------------------


Log Entry : 14:29:09 2021年6月22日 

执行叶绿素浊度传感器转动清洁电刷指令失败！

------------------------------------


Log Entry : 14:29:57 2021年6月22日 

执行叶绿素浊度传感器转动清洁电刷指令失败！

------------------------------------


Log Entry : 14:30:36 2021年6月22日 

执行叶绿素浊度传感器急停指令失败！

------------------------------------


Log Entry : 14:40:27 2021年6月22日 

执行叶绿素浊度传感器转动清洁电刷指令成功！

------------------------------------


Log Entry : 14:41:27 2021年6月22日 

执行叶绿素浊度传感器转动清洁电刷指令成功！

------------------------------------


Log Entry : 14:41:50 2021年6月22日 

执行叶绿素浊度传感器转动清洁电刷指令失败！

------------------------------------


Log Entry : 14:42:02 2021年6月22日 

执行叶绿素浊度传感器转动清洁电刷指令失败！

------------------------------------


Log Entry : 14:42:34 2021年6月22日 

执行叶绿素浊度传感器转动清洁电刷指令成功！

------------------------------------


Log Entry : 14:44:19 2021年6月22日 

执行叶绿素浊度传感器转动清洁电刷指令失败！

------------------------------------


Log Entry : 14:44:24 2021年6月22日 

执行叶绿素浊度传感器转动清洁电刷指令成功！

------------------------------------


Log Entry : 14:44:34 2021年6月22日 

执行叶绿素浊度传感器转动清洁电刷指令成功！

------------------------------------


Log Entry : 14:44:39 2021年6月22日 

执行叶绿素浊度传感器转动清洁电刷指令成功！

------------------------------------


Log Entry : 14:44:47 2021年6月22日 

执行叶绿素浊度传感器急停指令成功！

------------------------------------


Log Entry : 14:44:51 2021年6月22日 

执行叶绿素浊度传感器转动清洁电刷指令失败！

------------------------------------


Log Entry : 14:44:54 2021年6月22日 

执行叶绿素浊度传感器转动清洁电刷指令成功！

------------------------------------


Log Entry : 14:46:09 2021年6月22日 

执行叶绿素浊度传感器转动清洁电刷指令成功！

------------------------------------


Log Entry : 14:46:12 2021年6月22日 

执行叶绿素浊度传感器急停指令成功！

------------------------------------


Log Entry : 14:46:18 2021年6月22日 

执行叶绿素浊度传感器转动清洁电刷指令成功！

------------------------------------


Log Entry : 15:35:16 2021年6月22日 

执行叶绿素浊度传感器转动清洁电刷指令成功！

------------------------------------


Log Entry : 15:35:26 2021年6月22日 

执行叶绿素浊度传感器急停指令成功！

------------------------------------


Log Entry : 10:22:52 2021年6月23日 

执行接驳盒执行通道5打开！

------------------------------------


Log Entry : 10:22:54 2021年6月23日 

接驳盒执行通道5打开成功！

------------------------------------


Log Entry : 10:24:05 2021年6月23日 

执行设置数据采集器温度报警阈值，温度上限:80.000温度下限:05.000

------------------------------------


Log Entry : 10:24:08 2021年6月23日 

执行设置数据采集器温度报警阈值成功！

------------------------------------


Log Entry : 10:26:15 2021年6月23日 

次级接驳盒通道5电压电流上下限设置成功！

------------------------------------


Log Entry : 10:26:26 2021年6月23日 

执行接驳盒执行通道5关闭！

------------------------------------


Log Entry : 10:26:28 2021年6月23日 

接驳盒执行通道5关闭成功！

------------------------------------


Log Entry : 10:26:29 2021年6月23日 

执行接驳盒执行通道5打开！

------------------------------------


Log Entry : 10:26:31 2021年6月23日 

接驳盒执行通道5打开成功！

------------------------------------


Log Entry : 10:27:14 2021年6月23日 

执行接驳盒执行通道5关闭！

------------------------------------


Log Entry : 10:27:16 2021年6月23日 

接驳盒执行通道5关闭成功！

------------------------------------


Log Entry : 10:28:47 2021年6月23日 

执行接驳盒执行通道5打开！

------------------------------------


Log Entry : 10:28:49 2021年6月23日 

接驳盒执行通道5打开成功！

------------------------------------


Log Entry : 10:31:29 2021年6月23日 

执行叶绿素浊度传感器急停指令成功！

------------------------------------


Log Entry : 10:32:46 2021年6月23日 

执行接驳盒执行通道5关闭！

------------------------------------


Log Entry : 10:32:48 2021年6月23日 

接驳盒执行通道5关闭成功！

------------------------------------


Log Entry : 10:34:40 2021年6月23日 

执行通道1打开！

------------------------------------


Log Entry : 10:34:43 2021年6月23日 

执行通道1打开失败！

------------------------------------


Log Entry : 10:34:59 2021年6月23日 

执行通道3打开！

------------------------------------


Log Entry : 10:35:03 2021年6月23日 

执行通道3打开失败！

------------------------------------


Log Entry : 10:35:36 2021年6月23日 

执行通道3打开！

------------------------------------


Log Entry : 10:35:38 2021年6月23日 

执行通道3打开成功！

------------------------------------


Log Entry : 15:40:22 2021年6月23日 

执行接驳盒通道1打开！

------------------------------------


Log Entry : 15:40:24 2021年6月23日 

接驳盒通道1打开成功！

------------------------------------


Log Entry : 15:42:26 2021年6月23日 

执行通道3关闭！

------------------------------------


Log Entry : 15:42:28 2021年6月23日 

执行通道3关闭成功！

------------------------------------


Log Entry : 15:43:39 2021年6月23日 

执行通道3打开！

------------------------------------


Log Entry : 15:43:41 2021年6月23日 

执行通道3打开成功！

------------------------------------


Log Entry : 16:03:12 2021年6月23日 

执行通道3打开！

------------------------------------


Log Entry : 16:03:15 2021年6月23日 

执行通道3打开成功！

------------------------------------


Log Entry : 16:03:16 2021年6月23日 

执行通道4打开！

------------------------------------


Log Entry : 16:03:18 2021年6月23日 

执行通道4打开成功！

------------------------------------


Log Entry : 16:14:53 2021年6月23日 

执行通道3打开！

------------------------------------


Log Entry : 16:14:56 2021年6月23日 

执行通道3打开成功！

------------------------------------


Log Entry : 16:14:57 2021年6月23日 

执行通道4打开！

------------------------------------


Log Entry : 16:14:58 2021年6月23日 

执行通道4打开成功！

------------------------------------


Log Entry : 16:22:40 2021年6月23日 

执行叶绿素浊度传感器转动清洁电刷指令成功！

------------------------------------


Log Entry : 16:30:45 2021年6月23日 

执行通道1打开！

------------------------------------


Log Entry : 16:30:47 2021年6月23日 

执行通道1打开成功！

------------------------------------


Log Entry : 16:30:48 2021年6月23日 

执行通道2打开！

------------------------------------


Log Entry : 16:30:49 2021年6月23日 

执行通道2打开成功！

------------------------------------


Log Entry : 16:31:07 2021年6月23日 

通道3关断！

------------------------------------


Log Entry : 16:32:29 2021年6月23日 

执行通道2关闭！

------------------------------------


Log Entry : 16:32:31 2021年6月23日 

执行通道2关闭成功！

------------------------------------


Log Entry : 16:32:37 2021年6月23日 

执行通道2打开！

------------------------------------


Log Entry : 16:32:40 2021年6月23日 

执行通道2打开成功！

------------------------------------


Log Entry : 16:32:47 2021年6月23日 

通道3关断！

------------------------------------


Log Entry : 16:42:21 2021年6月23日 

执行接驳盒通道1打开！

------------------------------------


Log Entry : 16:42:22 2021年6月23日 

接驳盒通道1打开成功！

------------------------------------


Log Entry : 16:42:29 2021年6月23日 

执行通道1打开！

------------------------------------


Log Entry : 16:42:31 2021年6月23日 

执行通道1打开成功！

------------------------------------


Log Entry : 16:42:32 2021年6月23日 

执行通道3打开！

------------------------------------


Log Entry : 16:42:34 2021年6月23日 

执行通道3打开成功！

------------------------------------


Log Entry : 16:42:35 2021年6月23日 

执行通道4打开！

------------------------------------


Log Entry : 16:42:37 2021年6月23日 

执行通道4打开成功！

------------------------------------


Log Entry : 16:42:38 2021年6月23日 

执行通道5打开！

------------------------------------


Log Entry : 16:42:40 2021年6月23日 

执行通道5打开成功！

------------------------------------


Log Entry : 16:43:03 2021年6月23日 

执行设置数据采集器通道2报警阈值，电流上限:02.000电流下限:00.000电压上限:13.000电压下限:11.000

------------------------------------


Log Entry : 16:43:06 2021年6月23日 

执行设置数据采集器通道2报警阈值成功！

------------------------------------


Log Entry : 16:43:12 2021年6月23日 

执行通道2打开！

------------------------------------


Log Entry : 16:43:15 2021年6月23日 

执行通道2打开成功！

------------------------------------


Log Entry : 16:59:07 2021年6月23日 

执行通道1打开！

------------------------------------


Log Entry : 16:59:08 2021年6月23日 

执行通道1打开成功！

------------------------------------


Log Entry : 16:59:13 2021年6月23日 

执行通道2打开！

------------------------------------


Log Entry : 16:59:15 2021年6月23日 

执行通道2打开成功！

------------------------------------


Log Entry : 16:59:16 2021年6月23日 

执行通道3打开！

------------------------------------


Log Entry : 16:59:18 2021年6月23日 

执行通道3打开成功！

------------------------------------


Log Entry : 16:59:19 2021年6月23日 

执行通道4打开！

------------------------------------


Log Entry : 16:59:21 2021年6月23日 

执行通道4打开成功！

------------------------------------


Log Entry : 16:59:22 2021年6月23日 

执行通道5打开！

------------------------------------


Log Entry : 16:59:24 2021年6月23日 

执行通道5打开成功！

------------------------------------


Log Entry : 9:54:49 2021年6月24日 

执行接驳盒通道1打开！

------------------------------------


Log Entry : 9:54:52 2021年6月24日 

接驳盒通道1打开成功！

------------------------------------


Log Entry : 9:58:03 2021年6月24日 

执行通道2打开！

------------------------------------


Log Entry : 9:58:06 2021年6月24日 

执行通道2打开成功！

------------------------------------


Log Entry : 9:59:50 2021年6月24日 

执行通道2关闭！

------------------------------------


Log Entry : 9:59:53 2021年6月24日 

执行通道2关闭成功！

------------------------------------


Log Entry : 11:03:40 2021年6月24日 

执行通道2打开！

------------------------------------


Log Entry : 11:03:43 2021年6月24日 

执行通道2打开成功！

------------------------------------


Log Entry : 11:30:14 2021年6月24日 

执行通道2打开！

------------------------------------


Log Entry : 11:30:15 2021年6月24日 

执行通道2打开成功！

------------------------------------


Log Entry : 11:30:17 2021年6月24日 

执行通道1打开！

------------------------------------


Log Entry : 11:30:19 2021年6月24日 

执行通道1打开成功！

------------------------------------


Log Entry : 11:30:21 2021年6月24日 

执行通道3打开！

------------------------------------


Log Entry : 11:30:22 2021年6月24日 

执行通道3打开成功！

------------------------------------


Log Entry : 11:30:23 2021年6月24日 

执行通道4打开！

------------------------------------


Log Entry : 11:30:25 2021年6月24日 

执行通道4打开成功！

------------------------------------


Log Entry : 14:29:16 2021年6月24日 

执行通道1打开！

------------------------------------


Log Entry : 14:29:18 2021年6月24日 

执行通道1打开成功！

------------------------------------


Log Entry : 14:29:18 2021年6月24日 

执行通道2打开！

------------------------------------


Log Entry : 14:29:20 2021年6月24日 

执行通道2打开成功！

------------------------------------


Log Entry : 14:29:20 2021年6月24日 

执行通道3打开！

------------------------------------


Log Entry : 14:29:22 2021年6月24日 

执行通道3打开成功！

------------------------------------


Log Entry : 14:29:22 2021年6月24日 

执行通道4打开！

------------------------------------


Log Entry : 14:29:23 2021年6月24日 

执行通道4打开成功！

------------------------------------


Log Entry : 14:29:26 2021年6月24日 

执行通道4关闭！

------------------------------------


Log Entry : 14:29:27 2021年6月24日 

执行通道4关闭成功！

------------------------------------


Log Entry : 14:29:28 2021年6月24日 

执行通道3关闭！

------------------------------------


Log Entry : 14:29:29 2021年6月24日 

执行通道3关闭成功！

------------------------------------


Log Entry : 14:29:30 2021年6月24日 

执行通道2关闭！

------------------------------------


Log Entry : 14:29:31 2021年6月24日 

执行通道2关闭成功！

------------------------------------


Log Entry : 14:29:32 2021年6月24日 

执行通道1关闭！

------------------------------------


Log Entry : 14:29:33 2021年6月24日 

执行通道1关闭成功！

------------------------------------


Log Entry : 14:38:27 2021年6月24日 

执行通道1打开！

------------------------------------


Log Entry : 14:38:35 2021年6月24日 

执行通道1打开成功！

------------------------------------


Log Entry : 14:38:36 2021年6月24日 

执行通道2打开！

------------------------------------


Log Entry : 14:38:37 2021年6月24日 

执行通道2打开成功！

------------------------------------


Log Entry : 14:38:38 2021年6月24日 

执行通道3打开！

------------------------------------


Log Entry : 14:38:39 2021年6月24日 

执行通道3打开成功！

------------------------------------


Log Entry : 14:38:40 2021年6月24日 

执行通道4打开！

------------------------------------


Log Entry : 14:38:42 2021年6月24日 

执行通道4打开成功！

------------------------------------


Log Entry : 14:44:16 2021年6月24日 

执行通道1关闭！

------------------------------------


Log Entry : 14:44:18 2021年6月24日 

执行通道1关闭成功！

------------------------------------


Log Entry : 14:44:20 2021年6月24日 

执行通道2关闭！

------------------------------------


Log Entry : 14:44:23 2021年6月24日 

执行通道2关闭成功！

------------------------------------


Log Entry : 14:44:44 2021年6月24日 

执行通道4关闭！

------------------------------------


Log Entry : 14:44:45 2021年6月24日 

执行通道4关闭成功！

------------------------------------


Log Entry : 14:44:46 2021年6月24日 

执行通道3关闭！

------------------------------------


Log Entry : 14:44:48 2021年6月24日 

执行通道3关闭成功！

------------------------------------


Log Entry : 14:44:49 2021年6月24日 

执行通道1打开！

------------------------------------


Log Entry : 14:44:51 2021年6月24日 

执行通道1打开成功！

------------------------------------


Log Entry : 14:50:52 2021年6月24日 

执行通道1关闭！

------------------------------------


Log Entry : 14:50:59 2021年6月24日 

执行通道1关闭成功！

------------------------------------


Log Entry : 15:04:14 2021年6月24日 

执行接驳盒通道1打开！

------------------------------------


Log Entry : 15:04:16 2021年6月24日 

接驳盒通道1打开成功！

------------------------------------


Log Entry : 15:05:23 2021年6月24日 

执行通道1打开！

------------------------------------


Log Entry : 15:05:25 2021年6月24日 

执行通道1打开成功！

------------------------------------


Log Entry : 15:05:27 2021年6月24日 

执行通道2打开！

------------------------------------


Log Entry : 15:05:28 2021年6月24日 

执行通道2打开成功！

------------------------------------


Log Entry : 15:05:29 2021年6月24日 

执行通道3打开！

------------------------------------


Log Entry : 15:05:31 2021年6月24日 

执行通道3打开成功！

------------------------------------


Log Entry : 15:05:31 2021年6月24日 

执行通道4打开！

------------------------------------


Log Entry : 15:05:33 2021年6月24日 

执行通道4打开成功！

------------------------------------


Log Entry : 15:06:40 2021年8月16日 

执行接驳盒通道1打开！

------------------------------------


Log Entry : 15:06:43 2021年8月16日 

接驳盒通道1打开成功！

------------------------------------


Log Entry : 15:06:56 2021年8月16日 

执行通道1打开！

------------------------------------


Log Entry : 15:06:58 2021年8月16日 

执行通道1打开成功！

------------------------------------


Log Entry : 15:06:59 2021年8月16日 

执行通道2打开！

------------------------------------


Log Entry : 15:07:01 2021年8月16日 

执行通道2打开成功！

------------------------------------


Log Entry : 15:07:01 2021年8月16日 

执行通道3打开！

------------------------------------


Log Entry : 15:07:03 2021年8月16日 

执行通道3打开成功！

------------------------------------


Log Entry : 15:07:03 2021年8月16日 

执行通道4打开！

------------------------------------


Log Entry : 15:07:05 2021年8月16日 

执行通道4打开成功！

------------------------------------


Log Entry : 15:07:06 2021年8月16日 

执行通道5打开！

------------------------------------


Log Entry : 15:07:07 2021年8月16日 

执行通道5打开成功！

------------------------------------


Log Entry : 15:08:45 2021年8月16日 

执行接驳盒执行通道5打开！

------------------------------------


Log Entry : 15:08:46 2021年8月16日 

接驳盒执行通道5打开成功！

------------------------------------


Log Entry : 15:11:53 2021年8月16日 

执行校时指令成功！

------------------------------------


Log Entry : 11:02:18 2021年9月27日 星期一 

执行接驳盒通道1打开！

------------------------------------


Log Entry : 11:02:55 2021年9月27日 星期一 

接驳盒执行通道1打开失败！

------------------------------------


Log Entry : 11:04:43 2021年9月27日 星期一 

执行接驳盒通道1打开！

------------------------------------


Log Entry : 11:24:21 2021年9月27日 星期一 

执行接驳盒通道1打开！

------------------------------------


Log Entry : 11:27:30 2021年9月27日 星期一 

执行接驳盒通道1打开！

------------------------------------


Log Entry : 13:28:36 2021年9月27日 星期一 

执行接驳盒通道1打开！

------------------------------------


Log Entry : 13:29:22 2021年9月27日 星期一 

执行接驳盒通道1打开！

------------------------------------


Log Entry : 13:30:00 2021年9月27日 星期一 

执行接驳盒通道1打开！

------------------------------------


Log Entry : 13:46:55 2021年9月27日 星期一 

接驳盒执行通道1打开失败！

------------------------------------


Log Entry : 13:48:07 2021年9月27日 星期一 

执行接驳盒通道1打开！

------------------------------------


Log Entry : 13:48:22 2021年9月27日 星期一 

接驳盒通道1打开成功！

------------------------------------


Log Entry : 13:49:05 2021年9月27日 星期一 

执行接驳盒通道1打开！

------------------------------------


Log Entry : 13:49:43 2021年9月27日 星期一 

接驳盒执行通道1打开成功！

------------------------------------


Log Entry : 13:50:02 2021年9月27日 星期一 

执行接驳盒通道1打开！

------------------------------------


Log Entry : 13:50:22 2021年9月27日 星期一 

接驳盒执行通道1打开成功！

------------------------------------


Log Entry : 15:57:28 2021年9月27日 星期一 

执行接驳盒通道1打开！

------------------------------------


Log Entry : 15:57:49 2021年9月27日 星期一 

云服务器远程执行接驳盒执行通道1打开成功！

------------------------------------


Log Entry : 16:18:40 2021年9月27日 星期一 

云服务器远程执行接驳盒通道1打开！

------------------------------------


Log Entry : 16:18:45 2021年9月27日 星期一 

云服务器远程执行接驳盒执行通道1打开失败！

------------------------------------


Log Entry : 16:19:05 2021年9月27日 星期一 

云服务器远程执行接驳盒通道1打开！

------------------------------------


Log Entry : 16:19:10 2021年9月27日 星期一 

云服务器远程执行接驳盒执行通道1打开失败！

------------------------------------


Log Entry : 16:19:53 2021年9月27日 星期一 

云服务器远程执行接驳盒通道1打开！

------------------------------------


Log Entry : 16:34:06 2021年9月27日 星期一 

云服务器远程执行接驳盒通道1打开！

------------------------------------


Log Entry : 16:34:09 2021年9月27日 星期一 

云服务器远程执行接驳盒执行通道1打开成功！

------------------------------------


Log Entry : 16:34:41 2021年9月27日 星期一 

云服务器远程执行接驳盒通道2打开！

------------------------------------


Log Entry : 16:34:44 2021年9月27日 星期一 

云服务器远程执行接驳盒执行通道2打开成功！

------------------------------------


Log Entry : 16:35:00 2021年9月27日 星期一 

云服务器远程执行接驳盒通道3打开！

------------------------------------


Log Entry : 16:35:03 2021年9月27日 星期一 

云服务器远程执行接驳盒执行通道3打开成功！

------------------------------------


Log Entry : 16:35:20 2021年9月27日 星期一 

云服务器远程执行接驳盒通道4打开！

------------------------------------


Log Entry : 16:35:23 2021年9月27日 星期一 

云服务器远程执行接驳盒执行通道4打开成功！

------------------------------------


Log Entry : 16:35:46 2021年9月27日 星期一 

云服务器远程执行接驳盒通道5打开！

------------------------------------


Log Entry : 16:35:49 2021年9月27日 星期一 

云服务器远程执行接驳盒执行通道5打开成功！

------------------------------------


Log Entry : 10:15:07 2021年10月4日 星期一 

云服务器远程执行接驳盒通道1关闭！

------------------------------------


Log Entry : 10:15:12 2021年10月4日 星期一 

云服务器远程执行接驳盒通道1关闭失败！

------------------------------------


Log Entry : 10:16:31 2021年10月4日 星期一 

云服务器远程执行接驳盒通道1关闭！

------------------------------------


Log Entry : 10:16:32 2021年10月4日 星期一 

云服务器远程执行接驳盒通道1关闭成功！

------------------------------------


Log Entry : 10:17:30 2021年10月4日 星期一 

云服务器远程执行接驳盒通道1打开！

------------------------------------


Log Entry : 10:17:31 2021年10月4日 星期一 

云服务器远程执行接驳盒通道1打开成功！

------------------------------------


Log Entry : 10:18:24 2021年10月4日 星期一 

云服务器远程执行接驳盒通道1关闭！

------------------------------------


Log Entry : 10:18:27 2021年10月4日 星期一 

云服务器远程执行接驳盒通道1关闭成功！

------------------------------------


Log Entry : 11:14:09 2021年10月4日 星期一 

云服务器远程执行接驳盒通道1打开！

------------------------------------


Log Entry : 13:21:07 2021年10月4日 星期一 

云服务器远程执行接驳盒通道1打开！

------------------------------------


Log Entry : 13:21:10 2021年10月4日 星期一 

云服务器远程执行接驳盒通道1打开成功！

------------------------------------


Log Entry : 13:38:56 2021年10月4日 星期一 

云服务器远程执行接驳盒通道1关闭！

------------------------------------


Log Entry : 13:38:59 2021年10月4日 星期一 

云服务器远程执行接驳盒通道1关闭成功！

------------------------------------


Log Entry : 14:22:41 2021年10月4日 星期一 

云服务器远程设置通道2上下限指令成功！

------------------------------------


Log Entry : 14:23:31 2021年10月4日 星期一 

云服务器远程设置通道3上下限指令成功！

------------------------------------


Log Entry : 16:10:33 2021年10月4日 星期一 

云服务器远程执行数据采集器通道1打开失败！

------------------------------------


Log Entry : 16:12:58 2021年10月4日 星期一 

云服务器远程执行数据采集器通道1打开失败！

------------------------------------


Log Entry : 15:15:20 2021年10月5日 星期二 

云服务器远程执行数据采集器通道1打开成功！

------------------------------------


Log Entry : 15:15:45 2021年10月5日 星期二 

云服务器远程执行数据采集器通道2打开成功！

------------------------------------


Log Entry : 15:16:07 2021年10月5日 星期二 

云服务器远程执行数据采集器通道3打开成功！

------------------------------------


Log Entry : 15:16:20 2021年10月5日 星期二 

云服务器执行数据采集器通道4打开成功！

------------------------------------


Log Entry : 15:16:41 2021年10月5日 星期二 

云服务器远程执行数据采集器通道5打开失败！

------------------------------------


Log Entry : 15:17:08 2021年10月5日 星期二 

云服务器远程执行数据采集器通道5打开成功！

------------------------------------


Log Entry : 15:18:09 2021年10月5日 星期二 

云服务器远程执行数据采集器通道1关闭成功！

------------------------------------


Log Entry : 15:18:23 2021年10月5日 星期二 

云服务器远程执行数据采集器通道2关闭成功！

------------------------------------


Log Entry : 15:18:37 2021年10月5日 星期二 

云服务器远程执行数据采集器通道3关闭成功！

------------------------------------


Log Entry : 15:18:45 2021年10月5日 星期二 

云服务器远程执行数据采集器通道4关闭成功！

------------------------------------


Log Entry : 15:18:57 2021年10月5日 星期二 

云服务器远程执行数据采集器通道5关闭成功！

------------------------------------


Log Entry : 15:39:15 2021年10月5日 星期二 

云服务器远程执行设置数据采集器通道1报警阈值成功！

------------------------------------


Log Entry : 15:41:29 2021年10月5日 星期二 

云服务器远程执行设置数据采集器通道2报警阈值成功！

------------------------------------


Log Entry : 15:42:55 2021年10月5日 星期二 

云服务器远程执行设置数据采集器通道3报警阈值成功！

------------------------------------


Log Entry : 15:43:35 2021年10月5日 星期二 

云服务器远程执行设置数据采集器通道4报警阈值成功！

------------------------------------


Log Entry : 15:44:08 2021年10月5日 星期二 

云服务器远程执行设置数据采集器通道5报警阈值成功！

------------------------------------


Log Entry : 10:41:43 2022年4月15日 星期五 

云服务器远程执行接驳盒通道1打开！

------------------------------------


Log Entry : 10:41:48 2022年4月15日 星期五 

云服务器远程执行接驳盒执行通道1打开失败！

------------------------------------


Log Entry : 15:06:52 2022年4月15日 星期五 

云服务器远程执行数据采集器通道1关闭失败！

------------------------------------


Log Entry : 15:07:34 2022年4月15日 星期五 

云服务器远程执行数据采集器通道1打开失败！

------------------------------------


Log Entry : 10:22:52 2022年4月27日 星期三 

执行接驳盒通道1打开！

------------------------------------


Log Entry : 10:22:54 2022年4月27日 星期三 

接驳盒通道1打开成功！

------------------------------------


Log Entry : 10:22:55 2022年4月27日 星期三 

执行接驳盒执行通道2打开！

------------------------------------


Log Entry : 10:22:57 2022年4月27日 星期三 

接驳盒执行通道2打开成功！

------------------------------------


Log Entry : 10:22:59 2022年4月27日 星期三 

执行接驳盒执行通道5打开！

------------------------------------


Log Entry : 10:23:01 2022年4月27日 星期三 

接驳盒执行通道5打开成功！

------------------------------------


Log Entry : 10:24:19 2022年4月27日 星期三 

执行通道1打开！

------------------------------------


Log Entry : 10:24:27 2022年4月27日 星期三 

执行通道1打开成功！

------------------------------------


Log Entry : 10:24:29 2022年4月27日 星期三 

执行通道2打开！

------------------------------------


Log Entry : 10:24:31 2022年4月27日 星期三 

执行通道2打开成功！

------------------------------------


Log Entry : 10:24:32 2022年4月27日 星期三 

执行通道3打开！

------------------------------------


Log Entry : 10:24:34 2022年4月27日 星期三 

执行通道3打开成功！

------------------------------------


Log Entry : 10:24:34 2022年4月27日 星期三 

执行通道4打开！

------------------------------------


Log Entry : 10:24:48 2022年4月27日 星期三 

执行通道4打开失败！

------------------------------------


Log Entry : 10:24:49 2022年4月27日 星期三 

执行通道4打开！

------------------------------------


Log Entry : 10:24:51 2022年4月27日 星期三 

执行通道4打开成功！

------------------------------------


Log Entry : 10:24:52 2022年4月27日 星期三 

执行通道5打开！

------------------------------------


Log Entry : 10:24:55 2022年4月27日 星期三 

执行通道5打开成功！

------------------------------------


Log Entry : 13:25:46 2022年4月28日 

执行主接驳盒通道1打开！

------------------------------------


Log Entry : 13:25:52 2022年4月28日 

主接驳盒执行通道1打开失败！

------------------------------------


Log Entry : 13:25:55 2022年4月28日 

执行接驳盒通道1打开！

------------------------------------


Log Entry : 13:25:56 2022年4月28日 

接驳盒通道1打开成功！

------------------------------------


Log Entry : 13:25:57 2022年4月28日 

执行接驳盒执行通道2打开！

------------------------------------


Log Entry : 13:25:58 2022年4月28日 

接驳盒执行通道2打开成功！

------------------------------------


Log Entry : 13:26:00 2022年4月28日 

执行接驳盒执行通道5打开！

------------------------------------


Log Entry : 13:26:01 2022年4月28日 

接驳盒执行通道5打开成功！

------------------------------------


Log Entry : 13:26:28 2022年4月28日 

执行通道1打开！

------------------------------------


Log Entry : 13:26:56 2022年4月28日 

执行通道1打开失败！

------------------------------------


Log Entry : 13:27:04 2022年4月28日 

执行通道1打开！

------------------------------------


Log Entry : 13:27:06 2022年4月28日 

执行通道1打开成功！

------------------------------------


Log Entry : 13:27:07 2022年4月28日 

执行通道2打开！

------------------------------------


Log Entry : 13:27:20 2022年4月28日 

执行通道2打开失败！

------------------------------------


Log Entry : 13:27:33 2022年4月28日 

执行通道2打开！

------------------------------------


Log Entry : 13:27:35 2022年4月28日 

执行通道2打开成功！

------------------------------------


Log Entry : 13:27:36 2022年4月28日 

执行通道3打开！

------------------------------------


Log Entry : 13:27:38 2022年4月28日 

执行通道3打开成功！

------------------------------------


Log Entry : 13:27:47 2022年4月28日 

执行通道4打开！

------------------------------------


Log Entry : 13:27:49 2022年4月28日 

执行通道4打开成功！

------------------------------------


Log Entry : 13:27:51 2022年4月28日 

执行通道5打开！

------------------------------------


Log Entry : 13:27:53 2022年4月28日 

执行通道5打开成功！

------------------------------------


Log Entry : 14:46:00 2022年6月10日 

执行接驳盒通道1打开！

------------------------------------


Log Entry : 14:46:02 2022年6月10日 

接驳盒通道1打开成功！

------------------------------------


Log Entry : 14:46:06 2022年6月10日 

执行通道1打开！

------------------------------------


Log Entry : 14:46:08 2022年6月10日 

执行通道1打开成功！

------------------------------------


Log Entry : 14:46:09 2022年6月10日 

执行通道2打开！

------------------------------------


Log Entry : 14:46:10 2022年6月10日 

执行通道2打开成功！

------------------------------------


Log Entry : 14:46:12 2022年6月10日 

执行通道3打开！

------------------------------------


Log Entry : 14:46:13 2022年6月10日 

执行通道3打开成功！

------------------------------------


Log Entry : 14:46:14 2022年6月10日 

执行通道4打开！

------------------------------------


Log Entry : 14:46:16 2022年6月10日 

执行通道4打开成功！

------------------------------------


Log Entry : 14:46:17 2022年6月10日 

执行通道5打开！

------------------------------------


Log Entry : 14:46:18 2022年6月10日 

执行通道5打开成功！

------------------------------------


Log Entry : 9:27:38 2022年6月13日 

执行接驳盒通道1打开！

------------------------------------


Log Entry : 9:27:41 2022年6月13日 

接驳盒通道1打开成功！

------------------------------------


Log Entry : 9:27:42 2022年6月13日 

执行接驳盒执行通道2打开！

------------------------------------


Log Entry : 9:27:44 2022年6月13日 

接驳盒执行通道2打开成功！

------------------------------------


Log Entry : 9:27:45 2022年6月13日 

执行接驳盒执行通道5打开！

------------------------------------


Log Entry : 9:27:47 2022年6月13日 

接驳盒执行通道5打开成功！

------------------------------------


Log Entry : 9:28:58 2022年6月13日 

执行通道1打开！

------------------------------------


Log Entry : 9:29:01 2022年6月13日 

执行通道1打开成功！

------------------------------------


Log Entry : 9:29:02 2022年6月13日 

执行通道2打开！

------------------------------------


Log Entry : 9:29:04 2022年6月13日 

执行通道2打开成功！

------------------------------------


Log Entry : 9:29:05 2022年6月13日 

执行通道3打开！

------------------------------------


Log Entry : 9:29:07 2022年6月13日 

执行通道3打开成功！

------------------------------------


Log Entry : 9:29:08 2022年6月13日 

执行通道4打开！

------------------------------------


Log Entry : 9:29:10 2022年6月13日 

执行通道4打开成功！

------------------------------------


Log Entry : 9:29:11 2022年6月13日 

执行通道5打开！

------------------------------------


Log Entry : 9:29:14 2022年6月13日 

执行通道5打开成功！

------------------------------------


Log Entry : 14:46:18 2022年6月13日 

执行接驳盒通道1打开！

------------------------------------


Log Entry : 14:46:20 2022年6月13日 

接驳盒通道1打开成功！

------------------------------------


Log Entry : 14:46:22 2022年6月13日 

执行接驳盒执行通道2打开！

------------------------------------


Log Entry : 14:46:23 2022年6月13日 

接驳盒执行通道2打开成功！

------------------------------------


Log Entry : 14:46:25 2022年6月13日 

执行接驳盒执行通道5打开！

------------------------------------


Log Entry : 14:46:26 2022年6月13日 

接驳盒执行通道5打开成功！

------------------------------------


Log Entry : 14:46:33 2022年6月13日 

执行通道1打开！

------------------------------------


Log Entry : 14:46:35 2022年6月13日 

执行通道1打开成功！

------------------------------------


Log Entry : 14:46:36 2022年6月13日 

执行通道2打开！

------------------------------------


Log Entry : 14:46:37 2022年6月13日 

执行通道2打开成功！

------------------------------------


Log Entry : 14:46:38 2022年6月13日 

执行通道3打开！

------------------------------------


Log Entry : 14:46:40 2022年6月13日 

执行通道3打开成功！

------------------------------------


Log Entry : 14:46:40 2022年6月13日 

执行通道4打开！

------------------------------------


Log Entry : 14:46:42 2022年6月13日 

执行通道4打开成功！

------------------------------------


Log Entry : 14:46:43 2022年6月13日 

执行通道5打开！

------------------------------------


Log Entry : 14:46:44 2022年6月13日 

执行通道5打开成功！

------------------------------------


Log Entry : 14:09:13 2022年6月20日 

执行接驳盒通道1打开！

------------------------------------


Log Entry : 14:09:15 2022年6月20日 

接驳盒通道1打开成功！

------------------------------------


Log Entry : 14:09:18 2022年6月20日 

执行接驳盒执行通道5打开！

------------------------------------


Log Entry : 14:09:19 2022年6月20日 

接驳盒执行通道5打开成功！

------------------------------------


Log Entry : 14:09:37 2022年6月20日 

执行通道1打开！

------------------------------------


Log Entry : 14:09:38 2022年6月20日 

执行通道1打开成功！

------------------------------------


Log Entry : 14:09:41 2022年6月20日 

执行通道3打开！

------------------------------------


Log Entry : 14:09:43 2022年6月20日 

执行通道3打开成功！

------------------------------------


Log Entry : 14:09:44 2022年6月20日 

执行通道5打开！

------------------------------------


Log Entry : 14:09:46 2022年6月20日 

执行通道5打开成功！

------------------------------------
