# Supplementary material
Source: MDPI journal article supplement (https://www.mdpi.com/2077-1312/10/8/1051)
Supplement: s1 [file s1 › OSNSystem/OSNSystem/OSNSystem/bin/Debug/Formula.xml]

<?xml version="1.0" standalone="yes"?>
<NewDataSet>
  <Table1>
    <dataSrvIP></dataSrvIP>
    <number>1</number>
    <coefficient1>0.0000000162971558353552</coefficient1>
    <coefficient2>-0.0001576926444273443</coefficient2>
    <coefficient3>0.513171543893112</coefficient3>
    <coefficient4>-561.8478475121085</coefficient4>
  </Table1>
</NewDataSet>
