# Supplementary material
Source: MDPI journal article supplement (https://www.mdpi.com/2077-1312/10/8/1051)
Supplement: s1 [file s1 › OSNSystem/OSNSystem/OSNSystem/bin/Debug/IPandPortConfig.xml]

<?xml version="1.0" standalone="yes"?>
<NewDataSet>
  <Table1>
    <srvIP>192.168.1.181</srvIP>
    <srvPort>8002</srvPort>
    <ECSsrvIP>47.104.229.78</ECSsrvIP>
    <ECSsrvPort>9502</ECSsrvPort>
  </Table1>
</NewDataSet>
