# Supplementary material
Source: MDPI journal article supplement (https://www.mdpi.com/2077-1312/10/8/1051)
Supplement: s1 [file s1 › OSNSystem/OSNSystem/OSNSystem/bin/Debug/jquery-1.8.3.min.js]

/*! jQuery v1.8.3 jquery.com | jquery.org/license */
(function (e, t) {
    function _(e) {
        var t = M[e] = {};
        return v.each(e.split(y),
        function (e, n) {
            t[n] = !0
        }),
        t
    }
    function H(e, n, r) {
        if (r === t && e.nodeType === 1) {
            var i = "data-" + n.replace(P, "-$1").toLowerCase();
            r = e.getAttribute(i);
            if (typeof r == "string") {
                try {
                    r = r === "true" ? !0 : r === "false" ? !1 : r === "null" ? null : +r + "" === r ? +r : D.test(r) ? v.parseJSON(r) : r
                } catch (s) { }
                v.data(e, n, r)
            } else r = t
        }
        return r
    }
    function B(e) {
        var t;
        for (t in e) {
            if (t === "data" && v.isEmptyObject(e[t])) continue;
            if (t !== "toJSON") return !1
        }
        return !0
    }
    function et() {
        return !1
    }
    function tt() {
        return !0
    }
    function ut(e) {
        return !e || !e.parentNode || e.parentNode.nodeType === 11
    }
    function at(e, t) {
        do e = e[t];
        while (e && e.nodeType !== 1);
        return e
    }
    function ft(e, t, n) {
        t = t || 0;
        if (v.isFunction(t)) return v.grep(e,
        function (e, r) {
            var i = !!t.call(e, r, e);
            return i === n
        });
        if (t.nodeType) return v.grep(e,
        function (e, r) {
            return e === t === n
        });
        if (typeof t == "string") {
            var r = v.grep(e,
            function (e) {
                return e.nodeType === 1
            });
            if (it.test(t)) return v.filter(t, r, !n);
            t = v.filter(t, r)
        }
        return v.grep(e,
        function (e, r) {
            return v.inArray(e, t) >= 0 === n
        })
    }
    function lt(e) {
        var t = ct.split("|"),
        n = e.createDocumentFragment();
        if (n.createElement) while (t.length) n.createElement(t.pop());
        return n
    }
    function Lt(e, t) {
        return e.getElementsByTagName(t)[0] || e.appendChild(e.ownerDocument.createElement(t))
    }
    function At(e, t) {
        if (t.nodeType !== 1 || !v.hasData(e)) return;
        var n, r, i, s = v._data(e),
        o = v._data(t, s),
        u = s.events;
        if (u) {
            delete o.handle,
            o.events = {};
            for (n in u) for (r = 0, i = u[n].length; r < i; r++) v.event.add(t, n, u[n][r])
        }
        o.data && (o.data = v.extend({},
        o.data))
    }
    function Ot(e, t) {
        var n;
        if (t.nodeType !== 1) return;
        t.clearAttributes && t.clearAttributes(),
        t.mergeAttributes && t.mergeAttributes(e),
        n = t.nodeName.toLowerCase(),
        n === "object" ? (t.parentNode && (t.outerHTML = e.outerHTML), v.support.html5Clone && e.innerHTML && !v.trim(t.innerHTML) && (t.innerHTML = e.innerHTML)) : n === "input" && Et.test(e.type) ? (t.defaultChecked = t.checked = e.checked, t.value !== e.value && (t.value = e.value)) : n === "option" ? t.selected = e.defaultSelected : n === "input" || n === "textarea" ? t.defaultValue = e.defaultValue : n === "script" && t.text !== e.text && (t.text = e.text),
        t.removeAttribute(v.expando)
    }
    function Mt(e) {
        return typeof e.getElementsByTagName != "undefined" ? e.getElementsByTagName("*") : typeof e.querySelectorAll != "undefined" ? e.querySelectorAll("*") : []
    }
    function _t(e) {
        Et.test(e.type) && (e.defaultChecked = e.checked)
    }
    function Qt(e, t) {
        if (t in e) return t;
        var n = t.charAt(0).toUpperCase() + t.slice(1),
        r = t,
        i = Jt.length;
        while (i--) {
            t = Jt[i] + n;
            if (t in e) return t
        }
        return r
    }
    function Gt(e, t) {
        return e = t || e,
        v.css(e, "display") === "none" || !v.contains(e.ownerDocument, e)
    }
    function Yt(e, t) {
        var n, r, i = [],
        s = 0,
        o = e.length;
        for (; s < o; s++) {
            n = e[s];
            if (!n.style) continue;
            i[s] = v._data(n, "olddisplay"),
            t ? (!i[s] && n.style.display === "none" && (n.style.display = ""), n.style.display === "" && Gt(n) && (i[s] = v._data(n, "olddisplay", nn(n.nodeName)))) : (r = Dt(n, "display"), !i[s] && r !== "none" && v._data(n, "olddisplay", r))
        }
        for (s = 0; s < o; s++) {
            n = e[s];
            if (!n.style) continue;
            if (!t || n.style.display === "none" || n.style.display === "") n.style.display = t ? i[s] || "" : "none"
        }
        return e
    }
    function Zt(e, t, n) {
        var r = Rt.exec(t);
        return r ? Math.max(0, r[1] - (n || 0)) + (r[2] || "px") : t
    }
    function en(e, t, n, r) {
        var i = n === (r ? "border" : "content") ? 4 : t === "width" ? 1 : 0,
        s = 0;
        for (; i < 4; i += 2) n === "margin" && (s += v.css(e, n + $t[i], !0)),
        r ? (n === "content" && (s -= parseFloat(Dt(e, "padding" + $t[i])) || 0), n !== "margin" && (s -= parseFloat(Dt(e, "border" + $t[i] + "Width")) || 0)) : (s += parseFloat(Dt(e, "padding" + $t[i])) || 0, n !== "padding" && (s += parseFloat(Dt(e, "border" + $t[i] + "Width")) || 0));
        return s
    }
    function tn(e, t, n) {
        var r = t === "width" ? e.offsetWidth : e.offsetHeight,
        i = !0,
        s = v.support.boxSizing && v.css(e, "boxSizing") === "border-box";
        if (r <= 0 || r == null) {
            r = Dt(e, t);
            if (r < 0 || r == null) r = e.style[t];
            if (Ut.test(r)) return r;
            i = s && (v.support.boxSizingReliable || r === e.style[t]),
            r = parseFloat(r) || 0
        }
        return r + en(e, t, n || (s ? "border" : "content"), i) + "px"
    }
    function nn(e) {
        if (Wt[e]) return Wt[e];
        var t = v("<" + e + ">").appendTo(i.body),
        n = t.css("display");
        t.remove();
        if (n === "none" || n === "") {
            Pt = i.body.appendChild(Pt || v.extend(i.createElement("iframe"), {
                frameBorder: 0,
                width: 0,
                height: 0
            }));
            if (!Ht || !Pt.createElement) Ht = (Pt.contentWindow || Pt.contentDocument).document,
            Ht.write("<!doctype html><html><body>"),
            Ht.close();
            t = Ht.body.appendChild(Ht.createElement(e)),
            n = Dt(t, "display"),
            i.body.removeChild(Pt)
        }
        return Wt[e] = n,
        n
    }
    function fn(e, t, n, r) {
        var i;
        if (v.isArray(t)) v.each(t,
        function (t, i) {
            n || sn.test(e) ? r(e, i) : fn(e + "[" + (typeof i == "object" ? t : "") + "]", i, n, r)
        });
        else if (!n && v.type(t) === "object") for (i in t) fn(e + "[" + i + "]", t[i], n, r);
        else r(e, t)
    }
    function Cn(e) {
        return function (t, n) {
            typeof t != "string" && (n = t, t = "*");
            var r, i, s, o = t.toLowerCase().split(y),
            u = 0,
            a = o.length;
            if (v.isFunction(n)) for (; u < a; u++) r = o[u],
            s = /^\+/.test(r),
            s && (r = r.substr(1) || "*"),
            i = e[r] = e[r] || [],
            i[s ? "unshift" : "push"](n)
        }
    }
    function kn(e, n, r, i, s, o) {
        s = s || n.dataTypes[0],
        o = o || {},
        o[s] = !0;
        var u, a = e[s],
        f = 0,
        l = a ? a.length : 0,
        c = e === Sn;
        for (; f < l && (c || !u); f++) u = a[f](n, r, i),
        typeof u == "string" && (!c || o[u] ? u = t : (n.dataTypes.unshift(u), u = kn(e, n, r, i, u, o)));
        return (c || !u) && !o["*"] && (u = kn(e, n, r, i, "*", o)),
        u
    }
    function Ln(e, n) {
        var r, i, s = v.ajaxSettings.flatOptions || {};
        for (r in n) n[r] !== t && ((s[r] ? e : i || (i = {}))[r] = n[r]);
        i && v.extend(!0, e, i)
    }
    function An(e, n, r) {
        var i, s, o, u, a = e.contents,
        f = e.dataTypes,
        l = e.responseFields;
        for (s in l) s in r && (n[l[s]] = r[s]);
        while (f[0] === "*") f.shift(),
        i === t && (i = e.mimeType || n.getResponseHeader("content-type"));
        if (i) for (s in a) if (a[s] && a[s].test(i)) {
            f.unshift(s);
            break
        }
        if (f[0] in r) o = f[0];
        else {
            for (s in r) {
                if (!f[0] || e.converters[s + " " + f[0]]) {
                    o = s;
                    break
                }
                u || (u = s)
            }
            o = o || u
        }
        if (o) return o !== f[0] && f.unshift(o),
        r[o]
    }
    function On(e, t) {
        var n, r, i, s, o = e.dataTypes.slice(),
        u = o[0],
        a = {},
        f = 0;
        e.dataFilter && (t = e.dataFilter(t, e.dataType));
        if (o[1]) for (n in e.converters) a[n.toLowerCase()] = e.converters[n];
        for (; i = o[++f]; ) if (i !== "*") {
            if (u !== "*" && u !== i) {
                n = a[u + " " + i] || a["* " + i];
                if (!n) for (r in a) {
                    s = r.split(" ");
                    if (s[1] === i) {
                        n = a[u + " " + s[0]] || a["* " + s[0]];
                        if (n) {
                            n === !0 ? n = a[r] : a[r] !== !0 && (i = s[0], o.splice(f--, 0, i));
                            break
                        }
                    }
                }
                if (n !== !0) if (n && e["throws"]) t = n(t);
                else try {
                    t = n(t)
                } catch (l) {
                    return {
                        state: "parsererror",
                        error: n ? l : "No conversion from " + u + " to " + i
                    }
                }
            }
            u = i
        }
        return {
            state: "success",
            data: t
        }
    }
    function Fn() {
        try {
            return new e.XMLHttpRequest
        } catch (t) { }
    }
    function In() {
        try {
            return new e.ActiveXObject("Microsoft.XMLHTTP")
        } catch (t) { }
    }
    function $n() {
        return setTimeout(function () {
            qn = t
        },
        0),
        qn = v.now()
    }
    function Jn(e, t) {
        v.each(t,
        function (t, n) {
            var r = (Vn[t] || []).concat(Vn["*"]),
            i = 0,
            s = r.length;
            for (; i < s; i++) if (r[i].call(e, t, n)) return
        })
    }
    function Kn(e, t, n) {
        var r, i = 0,
        s = 0,
        o = Xn.length,
        u = v.Deferred().always(function () {
            delete a.elem
        }),
        a = function () {
            var t = qn || $n(),
            n = Math.max(0, f.startTime + f.duration - t),
            r = n / f.duration || 0,
            i = 1 - r,
            s = 0,
            o = f.tweens.length;
            for (; s < o; s++) f.tweens[s].run(i);
            return u.notifyWith(e, [f, i, n]),
            i < 1 && o ? n : (u.resolveWith(e, [f]), !1)
        },
        f = u.promise({
            elem: e,
            props: v.extend({},
            t),
            opts: v.extend(!0, {
                specialEasing: {}
            },
            n),
            originalProperties: t,
            originalOptions: n,
            startTime: qn || $n(),
            duration: n.duration,
            tweens: [],
            createTween: function (t, n, r) {
                var i = v.Tween(e, f.opts, t, n, f.opts.specialEasing[t] || f.opts.easing);
                return f.tweens.push(i),
                i
            },
            stop: function (t) {
                var n = 0,
                r = t ? f.tweens.length : 0;
                for (; n < r; n++) f.tweens[n].run(1);
                return t ? u.resolveWith(e, [f, t]) : u.rejectWith(e, [f, t]),
                this
            }
        }),
        l = f.props;
        Qn(l, f.opts.specialEasing);
        for (; i < o; i++) {
            r = Xn[i].call(f, e, l, f.opts);
            if (r) return r
        }
        return Jn(f, l),
        v.isFunction(f.opts.start) && f.opts.start.call(e, f),
        v.fx.timer(v.extend(a, {
            anim: f,
            queue: f.opts.queue,
            elem: e
        })),
        f.progress(f.opts.progress).done(f.opts.done, f.opts.complete).fail(f.opts.fail).always(f.opts.always)
    }
    function Qn(e, t) {
        var n, r, i, s, o;
        for (n in e) {
            r = v.camelCase(n),
            i = t[r],
            s = e[n],
            v.isArray(s) && (i = s[1], s = e[n] = s[0]),
            n !== r && (e[r] = s, delete e[n]),
            o = v.cssHooks[r];
            if (o && "expand" in o) {
                s = o.expand(s),
                delete e[r];
                for (n in s) n in e || (e[n] = s[n], t[n] = i)
            } else t[r] = i
        }
    }
    function Gn(e, t, n) {
        var r, i, s, o, u, a, f, l, c, h = this,
        p = e.style,
        d = {},
        m = [],
        g = e.nodeType && Gt(e);
        n.queue || (l = v._queueHooks(e, "fx"), l.unqueued == null && (l.unqueued = 0, c = l.empty.fire, l.empty.fire = function () {
            l.unqueued || c()
        }), l.unqueued++, h.always(function () {
            h.always(function () {
                l.unqueued--,
                v.queue(e, "fx").length || l.empty.fire()
            })
        })),
        e.nodeType === 1 && ("height" in t || "width" in t) && (n.overflow = [p.overflow, p.overflowX, p.overflowY], v.css(e, "display") === "inline" && v.css(e, "float") === "none" && (!v.support.inlineBlockNeedsLayout || nn(e.nodeName) === "inline" ? p.display = "inline-block" : p.zoom = 1)),
        n.overflow && (p.overflow = "hidden", v.support.shrinkWrapBlocks || h.done(function () {
            p.overflow = n.overflow[0],
            p.overflowX = n.overflow[1],
            p.overflowY = n.overflow[2]
        }));
        for (r in t) {
            s = t[r];
            if (Un.exec(s)) {
                delete t[r],
                a = a || s === "toggle";
                if (s === (g ? "hide" : "show")) continue;
                m.push(r)
            }
        }
        o = m.length;
        if (o) {
            u = v._data(e, "fxshow") || v._data(e, "fxshow", {}),
            "hidden" in u && (g = u.hidden),
            a && (u.hidden = !g),
            g ? v(e).show() : h.done(function () {
                v(e).hide()
            }),
            h.done(function () {
                var t;
                v.removeData(e, "fxshow", !0);
                for (t in d) v.style(e, t, d[t])
            });
            for (r = 0; r < o; r++) i = m[r],
            f = h.createTween(i, g ? u[i] : 0),
            d[i] = u[i] || v.style(e, i),
            i in u || (u[i] = f.start, g && (f.end = f.start, f.start = i === "width" || i === "height" ? 1 : 0))
        }
    }
    function Yn(e, t, n, r, i) {
        return new Yn.prototype.init(e, t, n, r, i)
    }
    function Zn(e, t) {
        var n, r = {
            height: e
        },
        i = 0;
        t = t ? 1 : 0;
        for (; i < 4; i += 2 - t) n = $t[i],
        r["margin" + n] = r["padding" + n] = e;
        return t && (r.opacity = r.width = e),
        r
    }
    function tr(e) {
        return v.isWindow(e) ? e : e.nodeType === 9 ? e.defaultView || e.parentWindow : !1
    }
    var n, r, i = e.document,
    s = e.location,
    o = e.navigator,
    u = e.jQuery,
    a = e.$,
    f = Array.prototype.push,
    l = Array.prototype.slice,
    c = Array.prototype.indexOf,
    h = Object.prototype.toString,
    p = Object.prototype.hasOwnProperty,
    d = String.prototype.trim,
    v = function (e, t) {
        return new v.fn.init(e, t, n)
    },
    m = /[\-+]?(?:\d*\.|)\d+(?:[eE][\-+]?\d+|)/.source,
    g = /\S/,
    y = /\s+/,
    b = /^[\s\uFEFF\xA0]+|[\s\uFEFF\xA0]+$/g,
    w = /^(?:[^#<]*(<[\w\W]+>)[^>]*$|#([\w\-]*)$)/,
    E = /^<(\w+)\s*\/?>(?:<\/\1>|)$/,
    S = /^[\],:{}\s]*$/,
    x = /(?:^|:|,)(?:\s*\[)+/g,
    T = /\\(?:["\\\/bfnrt]|u[\da-fA-F]{4})/g,
    N = /"[^"\\\r\n]*"|true|false|null|-?(?:\d\d*\.|)\d+(?:[eE][\-+]?\d+|)/g,
    C = /^-ms-/,
    k = /-([\da-z])/gi,
    L = function (e, t) {
        return (t + "").toUpperCase()
    },
    A = function () {
        i.addEventListener ? (i.removeEventListener("DOMContentLoaded", A, !1), v.ready()) : i.readyState === "complete" && (i.detachEvent("onreadystatechange", A), v.ready())
    },
    O = {};
    v.fn = v.prototype = {
        constructor: v,
        init: function (e, n, r) {
            var s, o, u, a;
            if (!e) return this;
            if (e.nodeType) return this.context = this[0] = e,
            this.length = 1,
            this;
            if (typeof e == "string") {
                e.charAt(0) === "<" && e.charAt(e.length - 1) === ">" && e.length >= 3 ? s = [null, e, null] : s = w.exec(e);
                if (s && (s[1] || !n)) {
                    if (s[1]) return n = n instanceof v ? n[0] : n,
                    a = n && n.nodeType ? n.ownerDocument || n : i,
                    e = v.parseHTML(s[1], a, !0),
                    E.test(s[1]) && v.isPlainObject(n) && this.attr.call(e, n, !0),
                    v.merge(this, e);
                    o = i.getElementById(s[2]);
                    if (o && o.parentNode) {
                        if (o.id !== s[2]) return r.find(e);
                        this.length = 1,
                        this[0] = o
                    }
                    return this.context = i,
                    this.selector = e,
                    this
                }
                return !n || n.jquery ? (n || r).find(e) : this.constructor(n).find(e)
            }
            return v.isFunction(e) ? r.ready(e) : (e.selector !== t && (this.selector = e.selector, this.context = e.context), v.makeArray(e, this))
        },
        selector: "",
        jquery: "1.8.3",
        length: 0,
        size: function () {
            return this.length
        },
        toArray: function () {
            return l.call(this)
        },
        get: function (e) {
            return e == null ? this.toArray() : e < 0 ? this[this.length + e] : this[e]
        },
        pushStack: function (e, t, n) {
            var r = v.merge(this.constructor(), e);
            return r.prevObject = this,
            r.context = this.context,
            t === "find" ? r.selector = this.selector + (this.selector ? " " : "") + n : t && (r.selector = this.selector + "." + t + "(" + n + ")"),
            r
        },
        each: function (e, t) {
            return v.each(this, e, t)
        },
        ready: function (e) {
            return v.ready.promise().done(e),
            this
        },
        eq: function (e) {
            return e = +e,
            e === -1 ? this.slice(e) : this.slice(e, e + 1)
        },
        first: function () {
            return this.eq(0)
        },
        last: function () {
            return this.eq(-1)
        },
        slice: function () {
            return this.pushStack(l.apply(this, arguments), "slice", l.call(arguments).join(","))
        },
        map: function (e) {
            return this.pushStack(v.map(this,
            function (t, n) {
                return e.call(t, n, t)
            }))
        },
        end: function () {
            return this.prevObject || this.constructor(null)
        },
        push: f,
        sort: [].sort,
        splice: [].splice
    },
    v.fn.init.prototype = v.fn,
    v.extend = v.fn.extend = function () {
        var e, n, r, i, s, o, u = arguments[0] || {},
        a = 1,
        f = arguments.length,
        l = !1;
        typeof u == "boolean" && (l = u, u = arguments[1] || {},
        a = 2),
        typeof u != "object" && !v.isFunction(u) && (u = {}),
        f === a && (u = this, --a);
        for (; a < f; a++) if ((e = arguments[a]) != null) for (n in e) {
            r = u[n],
            i = e[n];
            if (u === i) continue;
            l && i && (v.isPlainObject(i) || (s = v.isArray(i))) ? (s ? (s = !1, o = r && v.isArray(r) ? r : []) : o = r && v.isPlainObject(r) ? r : {},
            u[n] = v.extend(l, o, i)) : i !== t && (u[n] = i)
        }
        return u
    },
    v.extend({
        noConflict: function (t) {
            return e.$ === v && (e.$ = a),
            t && e.jQuery === v && (e.jQuery = u),
            v
        },
        isReady: !1,
        readyWait: 1,
        holdReady: function (e) {
            e ? v.readyWait++ : v.ready(!0)
        },
        ready: function (e) {
            if (e === !0 ? --v.readyWait : v.isReady) return;
            if (!i.body) return setTimeout(v.ready, 1);
            v.isReady = !0;
            if (e !== !0 && --v.readyWait > 0) return;
            r.resolveWith(i, [v]),
            v.fn.trigger && v(i).trigger("ready").off("ready")
        },
        isFunction: function (e) {
            return v.type(e) === "function"
        },
        isArray: Array.isArray ||
        function (e) {
            return v.type(e) === "array"
        },
        isWindow: function (e) {
            return e != null && e == e.window
        },
        isNumeric: function (e) {
            return !isNaN(parseFloat(e)) && isFinite(e)
        },
        type: function (e) {
            return e == null ? String(e) : O[h.call(e)] || "object"
        },
        isPlainObject: function (e) {
            if (!e || v.type(e) !== "object" || e.nodeType || v.isWindow(e)) return !1;
            try {
                if (e.constructor && !p.call(e, "constructor") && !p.call(e.constructor.prototype, "isPrototypeOf")) return !1
            } catch (n) {
                return !1
            }
            var r;
            for (r in e);
            return r === t || p.call(e, r)
        },
        isEmptyObject: function (e) {
            var t;
            for (t in e) return !1;
            return !0
        },
        error: function (e) {
            throw new Error(e)
        },
        parseHTML: function (e, t, n) {
            var r;
            return !e || typeof e != "string" ? null : (typeof t == "boolean" && (n = t, t = 0), t = t || i, (r = E.exec(e)) ? [t.createElement(r[1])] : (r = v.buildFragment([e], t, n ? null : []), v.merge([], (r.cacheable ? v.clone(r.fragment) : r.fragment).childNodes)))
        },
        parseJSON: function (t) {
            if (!t || typeof t != "string") return null;
            t = v.trim(t);
            if (e.JSON && e.JSON.parse) return e.JSON.parse(t);
            if (S.test(t.replace(T, "@").replace(N, "]").replace(x, ""))) return (new Function("return " + t))();
            v.error("Invalid JSON: " + t)
        },
        parseXML: function (n) {
            var r, i;
            if (!n || typeof n != "string") return null;
            try {
                e.DOMParser ? (i = new DOMParser, r = i.parseFromString(n, "text/xml")) : (r = new ActiveXObject("Microsoft.XMLDOM"), r.async = "false", r.loadXML(n))
            } catch (s) {
                r = t
            }
            return (!r || !r.documentElement || r.getElementsByTagName("parsererror").length) && v.error("Invalid XML: " + n),
            r
        },
        noop: function () { },
        globalEval: function (t) {
            t && g.test(t) && (e.execScript ||
            function (t) {
                e.eval.call(e, t)
            })(t)
        },
        camelCase: function (e) {
            return e.replace(C, "ms-").replace(k, L)
        },
        nodeName: function (e, t) {
            return e.nodeName && e.nodeName.toLowerCase() === t.toLowerCase()
        },
        each: function (e, n, r) {
            var i, s = 0,
            o = e.length,
            u = o === t || v.isFunction(e);
            if (r) {
                if (u) {
                    for (i in e) if (n.apply(e[i], r) === !1) break
                } else for (; s < o; ) if (n.apply(e[s++], r) === !1) break
            } else if (u) {
                for (i in e) if (n.call(e[i], i, e[i]) === !1) break
            } else for (; s < o; ) if (n.call(e[s], s, e[s++]) === !1) break;
            return e
        },
        trim: d && !d.call("\ufeff\u00a0") ?
        function (e) {
            return e == null ? "" : d.call(e)
        } : function (e) {
            return e == null ? "" : (e + "").replace(b, "")
        },
        makeArray: function (e, t) {
            var n, r = t || [];
            return e != null && (n = v.type(e), e.length == null || n === "string" || n === "function" || n === "regexp" || v.isWindow(e) ? f.call(r, e) : v.merge(r, e)),
            r
        },
        inArray: function (e, t, n) {
            var r;
            if (t) {
                if (c) return c.call(t, e, n);
                r = t.length,
                n = n ? n < 0 ? Math.max(0, r + n) : n : 0;
                for (; n < r; n++) if (n in t && t[n] === e) return n
            }
            return -1
        },
        merge: function (e, n) {
            var r = n.length,
            i = e.length,
            s = 0;
            if (typeof r == "number") for (; s < r; s++) e[i++] = n[s];
            else while (n[s] !== t) e[i++] = n[s++];
            return e.length = i,
            e
        },
        grep: function (e, t, n) {
            var r, i = [],
            s = 0,
            o = e.length;
            n = !!n;
            for (; s < o; s++) r = !!t(e[s], s),
            n !== r && i.push(e[s]);
            return i
        },
        map: function (e, n, r) {
            var i, s, o = [],
            u = 0,
            a = e.length,
            f = e instanceof v || a !== t && typeof a == "number" && (a > 0 && e[0] && e[a - 1] || a === 0 || v.isArray(e));
            if (f) for (; u < a; u++) i = n(e[u], u, r),
            i != null && (o[o.length] = i);
            else for (s in e) i = n(e[s], s, r),
            i != null && (o[o.length] = i);
            return o.concat.apply([], o)
        },
        guid: 1,
        proxy: function (e, n) {
            var r, i, s;
            return typeof n == "string" && (r = e[n], n = e, e = r),
            v.isFunction(e) ? (i = l.call(arguments, 2), s = function () {
                return e.apply(n, i.concat(l.call(arguments)))
            },
            s.guid = e.guid = e.guid || v.guid++, s) : t
        },
        access: function (e, n, r, i, s, o, u) {
            var a, f = r == null,
            l = 0,
            c = e.length;
            if (r && typeof r == "object") {
                for (l in r) v.access(e, n, l, r[l], 1, o, i);
                s = 1
            } else if (i !== t) {
                a = u === t && v.isFunction(i),
                f && (a ? (a = n, n = function (e, t, n) {
                    return a.call(v(e), n)
                }) : (n.call(e, i), n = null));
                if (n) for (; l < c; l++) n(e[l], r, a ? i.call(e[l], l, n(e[l], r)) : i, u);
                s = 1
            }
            return s ? e : f ? n.call(e) : c ? n(e[0], r) : o
        },
        now: function () {
            return (new Date).getTime()
        }
    }),
    v.ready.promise = function (t) {
        if (!r) {
            r = v.Deferred();
            if (i.readyState === "complete") setTimeout(v.ready, 1);
            else if (i.addEventListener) i.addEventListener("DOMContentLoaded", A, !1),
            e.addEventListener("load", v.ready, !1);
            else {
                i.attachEvent("onreadystatechange", A),
                e.attachEvent("onload", v.ready);
                var n = !1;
                try {
                    n = e.frameElement == null && i.documentElement
                } catch (s) { }
                n && n.doScroll &&
                function o() {
                    if (!v.isReady) {
                        try {
                            n.doScroll("left")
                        } catch (e) {
                            return setTimeout(o, 50)
                        }
                        v.ready()
                    }
                } ()
            }
        }
        return r.promise(t)
    },
    v.each("Boolean Number String Function Array Date RegExp Object".split(" "),
    function (e, t) {
        O["[object " + t + "]"] = t.toLowerCase()
    }),
    n = v(i);
    var M = {};
    v.Callbacks = function (e) {
        e = typeof e == "string" ? M[e] || _(e) : v.extend({},
        e);
        var n, r, i, s, o, u, a = [],
        f = !e.once && [],
        l = function (t) {
            n = e.memory && t,
            r = !0,
            u = s || 0,
            s = 0,
            o = a.length,
            i = !0;
            for (; a && u < o; u++) if (a[u].apply(t[0], t[1]) === !1 && e.stopOnFalse) {
                n = !1;
                break
            }
            i = !1,
            a && (f ? f.length && l(f.shift()) : n ? a = [] : c.disable())
        },
        c = {
            add: function () {
                if (a) {
                    var t = a.length; (function r(t) {
                        v.each(t,
                        function (t, n) {
                            var i = v.type(n);
                            i === "function" ? (!e.unique || !c.has(n)) && a.push(n) : n && n.length && i !== "string" && r(n)
                        })
                    })(arguments),
                    i ? o = a.length : n && (s = t, l(n))
                }
                return this
            },
            remove: function () {
                return a && v.each(arguments,
                function (e, t) {
                    var n;
                    while ((n = v.inArray(t, a, n)) > -1) a.splice(n, 1),
                    i && (n <= o && o--, n <= u && u--)
                }),
                this
            },
            has: function (e) {
                return v.inArray(e, a) > -1
            },
            empty: function () {
                return a = [],
                this
            },
            disable: function () {
                return a = f = n = t,
                this
            },
            disabled: function () {
                return !a
            },
            lock: function () {
                return f = t,
                n || c.disable(),
                this
            },
            locked: function () {
                return !f
            },
            fireWith: function (e, t) {
                return t = t || [],
                t = [e, t.slice ? t.slice() : t],
                a && (!r || f) && (i ? f.push(t) : l(t)),
                this
            },
            fire: function () {
                return c.fireWith(this, arguments),
                this
            },
            fired: function () {
                return !!r
            }
        };
        return c
    },
    v.extend({
        Deferred: function (e) {
            var t = [["resolve", "done", v.Callbacks("once memory"), "resolved"], ["reject", "fail", v.Callbacks("once memory"), "rejected"], ["notify", "progress", v.Callbacks("memory")]],
            n = "pending",
            r = {
                state: function () {
                    return n
                },
                always: function () {
                    return i.done(arguments).fail(arguments),
                    this
                },
                then: function () {
                    var e = arguments;
                    return v.Deferred(function (n) {
                        v.each(t,
                        function (t, r) {
                            var s = r[0],
                            o = e[t];
                            i[r[1]](v.isFunction(o) ?
                            function () {
                                var e = o.apply(this, arguments);
                                e && v.isFunction(e.promise) ? e.promise().done(n.resolve).fail(n.reject).progress(n.notify) : n[s + "With"](this === i ? n : this, [e])
                            } : n[s])
                        }),
                        e = null
                    }).promise()
                },
                promise: function (e) {
                    return e != null ? v.extend(e, r) : r
                }
            },
            i = {};
            return r.pipe = r.then,
            v.each(t,
            function (e, s) {
                var o = s[2],
                u = s[3];
                r[s[1]] = o.add,
                u && o.add(function () {
                    n = u
                },
                t[e ^ 1][2].disable, t[2][2].lock),
                i[s[0]] = o.fire,
                i[s[0] + "With"] = o.fireWith
            }),
            r.promise(i),
            e && e.call(i, i),
            i
        },
        when: function (e) {
            var t = 0,
            n = l.call(arguments),
            r = n.length,
            i = r !== 1 || e && v.isFunction(e.promise) ? r : 0,
            s = i === 1 ? e : v.Deferred(),
            o = function (e, t, n) {
                return function (r) {
                    t[e] = this,
                    n[e] = arguments.length > 1 ? l.call(arguments) : r,
                    n === u ? s.notifyWith(t, n) : --i || s.resolveWith(t, n)
                }
            },
            u,
            a,
            f;
            if (r > 1) {
                u = new Array(r),
                a = new Array(r),
                f = new Array(r);
                for (; t < r; t++) n[t] && v.isFunction(n[t].promise) ? n[t].promise().done(o(t, f, n)).fail(s.reject).progress(o(t, a, u)) : --i
            }
            return i || s.resolveWith(f, n),
            s.promise()
        }
    }),
    v.support = function () {
        var t, n, r, s, o, u, a, f, l, c, h, p = i.createElement("div");
        p.setAttribute("className", "t"),
        p.innerHTML = "  <link/><table></table><a href='/a'>a</a><input type='checkbox'/>",
        n = p.getElementsByTagName("*"),
        r = p.getElementsByTagName("a")[0];
        if (!n || !r || !n.length) return {};
        s = i.createElement("select"),
        o = s.appendChild(i.createElement("option")),
        u = p.getElementsByTagName("input")[0],
        r.style.cssText = "top:1px;float:left;opacity:.5",
        t = {
            leadingWhitespace: p.firstChild.nodeType === 3,
            tbody: !p.getElementsByTagName("tbody").length,
            htmlSerialize: !!p.getElementsByTagName("link").length,
            style: /top/.test(r.getAttribute("style")),
            hrefNormalized: r.getAttribute("href") === "/a",
            opacity: /^0.5/.test(r.style.opacity),
            cssFloat: !!r.style.cssFloat,
            checkOn: u.value === "on",
            optSelected: o.selected,
            getSetAttribute: p.className !== "t",
            enctype: !!i.createElement("form").enctype,
            html5Clone: i.createElement("nav").cloneNode(!0).outerHTML !== "<:nav></:nav>",
            boxModel: i.compatMode === "CSS1Compat",
            submitBubbles: !0,
            changeBubbles: !0,
            focusinBubbles: !1,
            deleteExpando: !0,
            noCloneEvent: !0,
            inlineBlockNeedsLayout: !1,
            shrinkWrapBlocks: !1,
            reliableMarginRight: !0,
            boxSizingReliable: !0,
            pixelPosition: !1
        },
        u.checked = !0,
        t.noCloneChecked = u.cloneNode(!0).checked,
        s.disabled = !0,
        t.optDisabled = !o.disabled;
        try {
            delete p.test
        } catch (d) {
            t.deleteExpando = !1
        } !p.addEventListener && p.attachEvent && p.fireEvent && (p.attachEvent("onclick", h = function () {
            t.noCloneEvent = !1
        }), p.cloneNode(!0).fireEvent("onclick"), p.detachEvent("onclick", h)),
        u = i.createElement("input"),
        u.value = "t",
        u.setAttribute("type", "radio"),
        t.radioValue = u.value === "t",
        u.setAttribute("checked", "checked"),
        u.setAttribute("name", "t"),
        p.appendChild(u),
        a = i.createDocumentFragment(),
        a.appendChild(p.lastChild),
        t.checkClone = a.cloneNode(!0).cloneNode(!0).lastChild.checked,
        t.appendChecked = u.checked,
        a.removeChild(u),
        a.appendChild(p);
        if (p.attachEvent) for (l in {
            submit: !0,
            change: !0,
            focusin: !0
        }) f = "on" + l,
        c = f in p,
        c || (p.setAttribute(f, "return;"), c = typeof p[f] == "function"),
        t[l + "Bubbles"] = c;
        return v(function () {
            var n, r, s, o, u = "padding:0;margin:0;border:0;display:block;overflow:hidden;",
            a = i.getElementsByTagName("body")[0];
            if (!a) return;
            n = i.createElement("div"),
            n.style.cssText = "visibility:hidden;border:0;width:0;height:0;position:static;top:0;margin-top:1px",
            a.insertBefore(n, a.firstChild),
            r = i.createElement("div"),
            n.appendChild(r),
            r.innerHTML = "<table><tr><td></td><td>t</td></tr></table>",
            s = r.getElementsByTagName("td"),
            s[0].style.cssText = "padding:0;margin:0;border:0;display:none",
            c = s[0].offsetHeight === 0,
            s[0].style.display = "",
            s[1].style.display = "none",
            t.reliableHiddenOffsets = c && s[0].offsetHeight === 0,
            r.innerHTML = "",
            r.style.cssText = "box-sizing:border-box;-moz-box-sizing:border-box;-webkit-box-sizing:border-box;padding:1px;border:1px;display:block;width:4px;margin-top:1%;position:absolute;top:1%;",
            t.boxSizing = r.offsetWidth === 4,
            t.doesNotIncludeMarginInBodyOffset = a.offsetTop !== 1,
            e.getComputedStyle && (t.pixelPosition = (e.getComputedStyle(r, null) || {}).top !== "1%", t.boxSizingReliable = (e.getComputedStyle(r, null) || {
                width: "4px"
            }).width === "4px", o = i.createElement("div"), o.style.cssText = r.style.cssText = u, o.style.marginRight = o.style.width = "0", r.style.width = "1px", r.appendChild(o), t.reliableMarginRight = !parseFloat((e.getComputedStyle(o, null) || {}).marginRight)),
            typeof r.style.zoom != "undefined" && (r.innerHTML = "", r.style.cssText = u + "width:1px;padding:1px;display:inline;zoom:1", t.inlineBlockNeedsLayout = r.offsetWidth === 3, r.style.display = "block", r.style.overflow = "visible", r.innerHTML = "<div></div>", r.firstChild.style.width = "5px", t.shrinkWrapBlocks = r.offsetWidth !== 3, n.style.zoom = 1),
            a.removeChild(n),
            n = r = s = o = null
        }),
        a.removeChild(p),
        n = r = s = o = u = a = p = null,
        t
    } ();
    var D = /(?:\{[\s\S]*\}|\[[\s\S]*\])$/,
    P = /([A-Z])/g;
    v.extend({
        cache: {},
        deletedIds: [],
        uuid: 0,
        expando: "jQuery" + (v.fn.jquery + Math.random()).replace(/\D/g, ""),
        noData: {
            embed: !0,
            object: "clsid:D27CDB6E-AE6D-11cf-96B8-444553540000",
            applet: !0
        },
        hasData: function (e) {
            return e = e.nodeType ? v.cache[e[v.expando]] : e[v.expando],
            !!e && !B(e)
        },
        data: function (e, n, r, i) {
            if (!v.acceptData(e)) return;
            var s, o, u = v.expando,
            a = typeof n == "string",
            f = e.nodeType,
            l = f ? v.cache : e,
            c = f ? e[u] : e[u] && u;
            if ((!c || !l[c] || !i && !l[c].data) && a && r === t) return;
            c || (f ? e[u] = c = v.deletedIds.pop() || v.guid++ : c = u),
            l[c] || (l[c] = {},
            f || (l[c].toJSON = v.noop));
            if (typeof n == "object" || typeof n == "function") i ? l[c] = v.extend(l[c], n) : l[c].data = v.extend(l[c].data, n);
            return s = l[c],
            i || (s.data || (s.data = {}), s = s.data),
            r !== t && (s[v.camelCase(n)] = r),
            a ? (o = s[n], o == null && (o = s[v.camelCase(n)])) : o = s,
            o
        },
        removeData: function (e, t, n) {
            if (!v.acceptData(e)) return;
            var r, i, s, o = e.nodeType,
            u = o ? v.cache : e,
            a = o ? e[v.expando] : v.expando;
            if (!u[a]) return;
            if (t) {
                r = n ? u[a] : u[a].data;
                if (r) {
                    v.isArray(t) || (t in r ? t = [t] : (t = v.camelCase(t), t in r ? t = [t] : t = t.split(" ")));
                    for (i = 0, s = t.length; i < s; i++) delete r[t[i]];
                    if (!(n ? B : v.isEmptyObject)(r)) return
                }
            }
            if (!n) {
                delete u[a].data;
                if (!B(u[a])) return
            }
            o ? v.cleanData([e], !0) : v.support.deleteExpando || u != u.window ? delete u[a] : u[a] = null
        },
        _data: function (e, t, n) {
            return v.data(e, t, n, !0)
        },
        acceptData: function (e) {
            var t = e.nodeName && v.noData[e.nodeName.toLowerCase()];
            return !t || t !== !0 && e.getAttribute("classid") === t
        }
    }),
    v.fn.extend({
        data: function (e, n) {
            var r, i, s, o, u, a = this[0],
            f = 0,
            l = null;
            if (e === t) {
                if (this.length) {
                    l = v.data(a);
                    if (a.nodeType === 1 && !v._data(a, "parsedAttrs")) {
                        s = a.attributes;
                        for (u = s.length; f < u; f++) o = s[f].name,
                        o.indexOf("data-") || (o = v.camelCase(o.substring(5)), H(a, o, l[o]));
                        v._data(a, "parsedAttrs", !0)
                    }
                }
                return l
            }
            return typeof e == "object" ? this.each(function () {
                v.data(this, e)
            }) : (r = e.split(".", 2), r[1] = r[1] ? "." + r[1] : "", i = r[1] + "!", v.access(this,
            function (n) {
                if (n === t) return l = this.triggerHandler("getData" + i, [r[0]]),
                l === t && a && (l = v.data(a, e), l = H(a, e, l)),
                l === t && r[1] ? this.data(r[0]) : l;
                r[1] = n,
                this.each(function () {
                    var t = v(this);
                    t.triggerHandler("setData" + i, r),
                    v.data(this, e, n),
                    t.triggerHandler("changeData" + i, r)
                })
            },
            null, n, arguments.length > 1, null, !1))
        },
        removeData: function (e) {
            return this.each(function () {
                v.removeData(this, e)
            })
        }
    }),
    v.extend({
        queue: function (e, t, n) {
            var r;
            if (e) return t = (t || "fx") + "queue",
            r = v._data(e, t),
            n && (!r || v.isArray(n) ? r = v._data(e, t, v.makeArray(n)) : r.push(n)),
            r || []
        },
        dequeue: function (e, t) {
            t = t || "fx";
            var n = v.queue(e, t),
            r = n.length,
            i = n.shift(),
            s = v._queueHooks(e, t),
            o = function () {
                v.dequeue(e, t)
            };
            i === "inprogress" && (i = n.shift(), r--),
            i && (t === "fx" && n.unshift("inprogress"), delete s.stop, i.call(e, o, s)),
            !r && s && s.empty.fire()
        },
        _queueHooks: function (e, t) {
            var n = t + "queueHooks";
            return v._data(e, n) || v._data(e, n, {
                empty: v.Callbacks("once memory").add(function () {
                    v.removeData(e, t + "queue", !0),
                    v.removeData(e, n, !0)
                })
            })
        }
    }),
    v.fn.extend({
        queue: function (e, n) {
            var r = 2;
            return typeof e != "string" && (n = e, e = "fx", r--),
            arguments.length < r ? v.queue(this[0], e) : n === t ? this : this.each(function () {
                var t = v.queue(this, e, n);
                v._queueHooks(this, e),
                e === "fx" && t[0] !== "inprogress" && v.dequeue(this, e)
            })
        },
        dequeue: function (e) {
            return this.each(function () {
                v.dequeue(this, e)
            })
        },
        delay: function (e, t) {
            return e = v.fx ? v.fx.speeds[e] || e : e,
            t = t || "fx",
            this.queue(t,
            function (t, n) {
                var r = setTimeout(t, e);
                n.stop = function () {
                    clearTimeout(r)
                }
            })
        },
        clearQueue: function (e) {
            return this.queue(e || "fx", [])
        },
        promise: function (e, n) {
            var r, i = 1,
            s = v.Deferred(),
            o = this,
            u = this.length,
            a = function () {
                --i || s.resolveWith(o, [o])
            };
            typeof e != "string" && (n = e, e = t),
            e = e || "fx";
            while (u--) r = v._data(o[u], e + "queueHooks"),
            r && r.empty && (i++, r.empty.add(a));
            return a(),
            s.promise(n)
        }
    });
    var j, F, I, q = /[\t\r\n]/g,
    R = /\r/g,
    U = /^(?:button|input)$/i,
    z = /^(?:button|input|object|select|textarea)$/i,
    W = /^a(?:rea|)$/i,
    X = /^(?:autofocus|autoplay|async|checked|controls|defer|disabled|hidden|loop|multiple|open|readonly|required|scoped|selected)$/i,
    V = v.support.getSetAttribute;
    v.fn.extend({
        attr: function (e, t) {
            return v.access(this, v.attr, e, t, arguments.length > 1)
        },
        removeAttr: function (e) {
            return this.each(function () {
                v.removeAttr(this, e)
            })
        },
        prop: function (e, t) {
            return v.access(this, v.prop, e, t, arguments.length > 1)
        },
        removeProp: function (e) {
            return e = v.propFix[e] || e,
            this.each(function () {
                try {
                    this[e] = t,
                    delete this[e]
                } catch (n) { }
            })
        },
        addClass: function (e) {
            var t, n, r, i, s, o, u;
            if (v.isFunction(e)) return this.each(function (t) {
                v(this).addClass(e.call(this, t, this.className))
            });
            if (e && typeof e == "string") {
                t = e.split(y);
                for (n = 0, r = this.length; n < r; n++) {
                    i = this[n];
                    if (i.nodeType === 1) if (!i.className && t.length === 1) i.className = e;
                    else {
                        s = " " + i.className + " ";
                        for (o = 0, u = t.length; o < u; o++) s.indexOf(" " + t[o] + " ") < 0 && (s += t[o] + " ");
                        i.className = v.trim(s)
                    }
                }
            }
            return this
        },
        removeClass: function (e) {
            var n, r, i, s, o, u, a;
            if (v.isFunction(e)) return this.each(function (t) {
                v(this).removeClass(e.call(this, t, this.className))
            });
            if (e && typeof e == "string" || e === t) {
                n = (e || "").split(y);
                for (u = 0, a = this.length; u < a; u++) {
                    i = this[u];
                    if (i.nodeType === 1 && i.className) {
                        r = (" " + i.className + " ").replace(q, " ");
                        for (s = 0, o = n.length; s < o; s++) while (r.indexOf(" " + n[s] + " ") >= 0) r = r.replace(" " + n[s] + " ", " ");
                        i.className = e ? v.trim(r) : ""
                    }
                }
            }
            return this
        },
        toggleClass: function (e, t) {
            var n = typeof e,
            r = typeof t == "boolean";
            return v.isFunction(e) ? this.each(function (n) {
                v(this).toggleClass(e.call(this, n, this.className, t), t)
            }) : this.each(function () {
                if (n === "string") {
                    var i, s = 0,
                    o = v(this),
                    u = t,
                    a = e.split(y);
                    while (i = a[s++]) u = r ? u : !o.hasClass(i),
                    o[u ? "addClass" : "removeClass"](i)
                } else if (n === "undefined" || n === "boolean") this.className && v._data(this, "__className__", this.className),
                this.className = this.className || e === !1 ? "" : v._data(this, "__className__") || ""
            })
        },
        hasClass: function (e) {
            var t = " " + e + " ",
            n = 0,
            r = this.length;
            for (; n < r; n++) if (this[n].nodeType === 1 && (" " + this[n].className + " ").replace(q, " ").indexOf(t) >= 0) return !0;
            return !1
        },
        val: function (e) {
            var n, r, i, s = this[0];
            if (!arguments.length) {
                if (s) return n = v.valHooks[s.type] || v.valHooks[s.nodeName.toLowerCase()],
                n && "get" in n && (r = n.get(s, "value")) !== t ? r : (r = s.value, typeof r == "string" ? r.replace(R, "") : r == null ? "" : r);
                return
            }
            return i = v.isFunction(e),
            this.each(function (r) {
                var s, o = v(this);
                if (this.nodeType !== 1) return;
                i ? s = e.call(this, r, o.val()) : s = e,
                s == null ? s = "" : typeof s == "number" ? s += "" : v.isArray(s) && (s = v.map(s,
                function (e) {
                    return e == null ? "" : e + ""
                })),
                n = v.valHooks[this.type] || v.valHooks[this.nodeName.toLowerCase()];
                if (!n || !("set" in n) || n.set(this, s, "value") === t) this.value = s
            })
        }
    }),
    v.extend({
        valHooks: {
            option: {
                get: function (e) {
                    var t = e.attributes.value;
                    return !t || t.specified ? e.value : e.text
                }
            },
            select: {
                get: function (e) {
                    var t, n, r = e.options,
                    i = e.selectedIndex,
                    s = e.type === "select-one" || i < 0,
                    o = s ? null : [],
                    u = s ? i + 1 : r.length,
                    a = i < 0 ? u : s ? i : 0;
                    for (; a < u; a++) {
                        n = r[a];
                        if ((n.selected || a === i) && (v.support.optDisabled ? !n.disabled : n.getAttribute("disabled") === null) && (!n.parentNode.disabled || !v.nodeName(n.parentNode, "optgroup"))) {
                            t = v(n).val();
                            if (s) return t;
                            o.push(t)
                        }
                    }
                    return o
                },
                set: function (e, t) {
                    var n = v.makeArray(t);
                    return v(e).find("option").each(function () {
                        this.selected = v.inArray(v(this).val(), n) >= 0
                    }),
                    n.length || (e.selectedIndex = -1),
                    n
                }
            }
        },
        attrFn: {},
        attr: function (e, n, r, i) {
            var s, o, u, a = e.nodeType;
            if (!e || a === 3 || a === 8 || a === 2) return;
            if (i && v.isFunction(v.fn[n])) return v(e)[n](r);
            if (typeof e.getAttribute == "undefined") return v.prop(e, n, r);
            u = a !== 1 || !v.isXMLDoc(e),
            u && (n = n.toLowerCase(), o = v.attrHooks[n] || (X.test(n) ? F : j));
            if (r !== t) {
                if (r === null) {
                    v.removeAttr(e, n);
                    return
                }
                return o && "set" in o && u && (s = o.set(e, r, n)) !== t ? s : (e.setAttribute(n, r + ""), r)
            }
            return o && "get" in o && u && (s = o.get(e, n)) !== null ? s : (s = e.getAttribute(n), s === null ? t : s)
        },
        removeAttr: function (e, t) {
            var n, r, i, s, o = 0;
            if (t && e.nodeType === 1) {
                r = t.split(y);
                for (; o < r.length; o++) i = r[o],
                i && (n = v.propFix[i] || i, s = X.test(i), s || v.attr(e, i, ""), e.removeAttribute(V ? i : n), s && n in e && (e[n] = !1))
            }
        },
        attrHooks: {
            type: {
                set: function (e, t) {
                    if (U.test(e.nodeName) && e.parentNode) v.error("type property can't be changed");
                    else if (!v.support.radioValue && t === "radio" && v.nodeName(e, "input")) {
                        var n = e.value;
                        return e.setAttribute("type", t),
                        n && (e.value = n),
                        t
                    }
                }
            },
            value: {
                get: function (e, t) {
                    return j && v.nodeName(e, "button") ? j.get(e, t) : t in e ? e.value : null
                },
                set: function (e, t, n) {
                    if (j && v.nodeName(e, "button")) return j.set(e, t, n);
                    e.value = t
                }
            }
        },
        propFix: {
            tabindex: "tabIndex",
            readonly: "readOnly",
            "for": "htmlFor",
            "class": "className",
            maxlength: "maxLength",
            cellspacing: "cellSpacing",
            cellpadding: "cellPadding",
            rowspan: "rowSpan",
            colspan: "colSpan",
            usemap: "useMap",
            frameborder: "frameBorder",
            contenteditable: "contentEditable"
        },
        prop: function (e, n, r) {
            var i, s, o, u = e.nodeType;
            if (!e || u === 3 || u === 8 || u === 2) return;
            return o = u !== 1 || !v.isXMLDoc(e),
            o && (n = v.propFix[n] || n, s = v.propHooks[n]),
            r !== t ? s && "set" in s && (i = s.set(e, r, n)) !== t ? i : e[n] = r : s && "get" in s && (i = s.get(e, n)) !== null ? i : e[n]
        },
        propHooks: {
            tabIndex: {
                get: function (e) {
                    var n = e.getAttributeNode("tabindex");
                    return n && n.specified ? parseInt(n.value, 10) : z.test(e.nodeName) || W.test(e.nodeName) && e.href ? 0 : t
                }
            }
        }
    }),
    F = {
        get: function (e, n) {
            var r, i = v.prop(e, n);
            return i === !0 || typeof i != "boolean" && (r = e.getAttributeNode(n)) && r.nodeValue !== !1 ? n.toLowerCase() : t
        },
        set: function (e, t, n) {
            var r;
            return t === !1 ? v.removeAttr(e, n) : (r = v.propFix[n] || n, r in e && (e[r] = !0), e.setAttribute(n, n.toLowerCase())),
            n
        }
    },
    V || (I = {
        name: !0,
        id: !0,
        coords: !0
    },
    j = v.valHooks.button = {
        get: function (e, n) {
            var r;
            return r = e.getAttributeNode(n),
            r && (I[n] ? r.value !== "" : r.specified) ? r.value : t
        },
        set: function (e, t, n) {
            var r = e.getAttributeNode(n);
            return r || (r = i.createAttribute(n), e.setAttributeNode(r)),
            r.value = t + ""
        }
    },
    v.each(["width", "height"],
    function (e, t) {
        v.attrHooks[t] = v.extend(v.attrHooks[t], {
            set: function (e, n) {
                if (n === "") return e.setAttribute(t, "auto"),
                n
            }
        })
    }), v.attrHooks.contenteditable = {
        get: j.get,
        set: function (e, t, n) {
            t === "" && (t = "false"),
            j.set(e, t, n)
        }
    }),
    v.support.hrefNormalized || v.each(["href", "src", "width", "height"],
    function (e, n) {
        v.attrHooks[n] = v.extend(v.attrHooks[n], {
            get: function (e) {
                var r = e.getAttribute(n, 2);
                return r === null ? t : r
            }
        })
    }),
    v.support.style || (v.attrHooks.style = {
        get: function (e) {
            return e.style.cssText.toLowerCase() || t
        },
        set: function (e, t) {
            return e.style.cssText = t + ""
        }
    }),
    v.support.optSelected || (v.propHooks.selected = v.extend(v.propHooks.selected, {
        get: function (e) {
            var t = e.parentNode;
            return t && (t.selectedIndex, t.parentNode && t.parentNode.selectedIndex),
            null
        }
    })),
    v.support.enctype || (v.propFix.enctype = "encoding"),
    v.support.checkOn || v.each(["radio", "checkbox"],
    function () {
        v.valHooks[this] = {
            get: function (e) {
                return e.getAttribute("value") === null ? "on" : e.value
            }
        }
    }),
    v.each(["radio", "checkbox"],
    function () {
        v.valHooks[this] = v.extend(v.valHooks[this], {
            set: function (e, t) {
                if (v.isArray(t)) return e.checked = v.inArray(v(e).val(), t) >= 0
            }
        })
    });
    var $ = /^(?:textarea|input|select)$/i,
    J = /^([^\.]*|)(?:\.(.+)|)$/,
    K = /(?:^|\s)hover(\.\S+|)\b/,
    Q = /^key/,
    G = /^(?:mouse|contextmenu)|click/,
    Y = /^(?:focusinfocus|focusoutblur)$/,
    Z = function (e) {
        return v.event.special.hover ? e : e.replace(K, "mouseenter$1 mouseleave$1")
    };
    v.event = {
        add: function (e, n, r, i, s) {
            var o, u, a, f, l, c, h, p, d, m, g;
            if (e.nodeType === 3 || e.nodeType === 8 || !n || !r || !(o = v._data(e))) return;
            r.handler && (d = r, r = d.handler, s = d.selector),
            r.guid || (r.guid = v.guid++),
            a = o.events,
            a || (o.events = a = {}),
            u = o.handle,
            u || (o.handle = u = function (e) {
                return typeof v == "undefined" || !!e && v.event.triggered === e.type ? t : v.event.dispatch.apply(u.elem, arguments)
            },
            u.elem = e),
            n = v.trim(Z(n)).split(" ");
            for (f = 0; f < n.length; f++) {
                l = J.exec(n[f]) || [],
                c = l[1],
                h = (l[2] || "").split(".").sort(),
                g = v.event.special[c] || {},
                c = (s ? g.delegateType : g.bindType) || c,
                g = v.event.special[c] || {},
                p = v.extend({
                    type: c,
                    origType: l[1],
                    data: i,
                    handler: r,
                    guid: r.guid,
                    selector: s,
                    needsContext: s && v.expr.match.needsContext.test(s),
                    namespace: h.join(".")
                },
                d),
                m = a[c];
                if (!m) {
                    m = a[c] = [],
                    m.delegateCount = 0;
                    if (!g.setup || g.setup.call(e, i, h, u) === !1) e.addEventListener ? e.addEventListener(c, u, !1) : e.attachEvent && e.attachEvent("on" + c, u)
                }
                g.add && (g.add.call(e, p), p.handler.guid || (p.handler.guid = r.guid)),
                s ? m.splice(m.delegateCount++, 0, p) : m.push(p),
                v.event.global[c] = !0
            }
            e = null
        },
        global: {},
        remove: function (e, t, n, r, i) {
            var s, o, u, a, f, l, c, h, p, d, m, g = v.hasData(e) && v._data(e);
            if (!g || !(h = g.events)) return;
            t = v.trim(Z(t || "")).split(" ");
            for (s = 0; s < t.length; s++) {
                o = J.exec(t[s]) || [],
                u = a = o[1],
                f = o[2];
                if (!u) {
                    for (u in h) v.event.remove(e, u + t[s], n, r, !0);
                    continue
                }
                p = v.event.special[u] || {},
                u = (r ? p.delegateType : p.bindType) || u,
                d = h[u] || [],
                l = d.length,
                f = f ? new RegExp("(^|\\.)" + f.split(".").sort().join("\\.(?:.*\\.|)") + "(\\.|$)") : null;
                for (c = 0; c < d.length; c++) m = d[c],
                (i || a === m.origType) && (!n || n.guid === m.guid) && (!f || f.test(m.namespace)) && (!r || r === m.selector || r === "**" && m.selector) && (d.splice(c--, 1), m.selector && d.delegateCount--, p.remove && p.remove.call(e, m));
                d.length === 0 && l !== d.length && ((!p.teardown || p.teardown.call(e, f, g.handle) === !1) && v.removeEvent(e, u, g.handle), delete h[u])
            }
            v.isEmptyObject(h) && (delete g.handle, v.removeData(e, "events", !0))
        },
        customEvent: {
            getData: !0,
            setData: !0,
            changeData: !0
        },
        trigger: function (n, r, s, o) {
            if (!s || s.nodeType !== 3 && s.nodeType !== 8) {
                var u, a, f, l, c, h, p, d, m, g, y = n.type || n,
                b = [];
                if (Y.test(y + v.event.triggered)) return;
                y.indexOf("!") >= 0 && (y = y.slice(0, -1), a = !0),
                y.indexOf(".") >= 0 && (b = y.split("."), y = b.shift(), b.sort());
                if ((!s || v.event.customEvent[y]) && !v.event.global[y]) return;
                n = typeof n == "object" ? n[v.expando] ? n : new v.Event(y, n) : new v.Event(y),
                n.type = y,
                n.isTrigger = !0,
                n.exclusive = a,
                n.namespace = b.join("."),
                n.namespace_re = n.namespace ? new RegExp("(^|\\.)" + b.join("\\.(?:.*\\.|)") + "(\\.|$)") : null,
                h = y.indexOf(":") < 0 ? "on" + y : "";
                if (!s) {
                    u = v.cache;
                    for (f in u) u[f].events && u[f].events[y] && v.event.trigger(n, r, u[f].handle.elem, !0);
                    return
                }
                n.result = t,
                n.target || (n.target = s),
                r = r != null ? v.makeArray(r) : [],
                r.unshift(n),
                p = v.event.special[y] || {};
                if (p.trigger && p.trigger.apply(s, r) === !1) return;
                m = [[s, p.bindType || y]];
                if (!o && !p.noBubble && !v.isWindow(s)) {
                    g = p.delegateType || y,
                    l = Y.test(g + y) ? s : s.parentNode;
                    for (c = s; l; l = l.parentNode) m.push([l, g]),
                    c = l;
                    c === (s.ownerDocument || i) && m.push([c.defaultView || c.parentWindow || e, g])
                }
                for (f = 0; f < m.length && !n.isPropagationStopped(); f++) l = m[f][0],
                n.type = m[f][1],
                d = (v._data(l, "events") || {})[n.type] && v._data(l, "handle"),
                d && d.apply(l, r),
                d = h && l[h],
                d && v.acceptData(l) && d.apply && d.apply(l, r) === !1 && n.preventDefault();
                return n.type = y,
                !o && !n.isDefaultPrevented() && (!p._default || p._default.apply(s.ownerDocument, r) === !1) && (y !== "click" || !v.nodeName(s, "a")) && v.acceptData(s) && h && s[y] && (y !== "focus" && y !== "blur" || n.target.offsetWidth !== 0) && !v.isWindow(s) && (c = s[h], c && (s[h] = null), v.event.triggered = y, s[y](), v.event.triggered = t, c && (s[h] = c)),
                n.result
            }
            return
        },
        dispatch: function (n) {
            n = v.event.fix(n || e.event);
            var r, i, s, o, u, a, f, c, h, p, d = (v._data(this, "events") || {})[n.type] || [],
            m = d.delegateCount,
            g = l.call(arguments),
            y = !n.exclusive && !n.namespace,
            b = v.event.special[n.type] || {},
            w = [];
            g[0] = n,
            n.delegateTarget = this;
            if (b.preDispatch && b.preDispatch.call(this, n) === !1) return;
            if (m && (!n.button || n.type !== "click")) for (s = n.target; s != this; s = s.parentNode || this) if (s.disabled !== !0 || n.type !== "click") {
                u = {},
                f = [];
                for (r = 0; r < m; r++) c = d[r],
                h = c.selector,
                u[h] === t && (u[h] = c.needsContext ? v(h, this).index(s) >= 0 : v.find(h, this, null, [s]).length),
                u[h] && f.push(c);
                f.length && w.push({
                    elem: s,
                    matches: f
                })
            }
            d.length > m && w.push({
                elem: this,
                matches: d.slice(m)
            });
            for (r = 0; r < w.length && !n.isPropagationStopped(); r++) {
                a = w[r],
                n.currentTarget = a.elem;
                for (i = 0; i < a.matches.length && !n.isImmediatePropagationStopped(); i++) {
                    c = a.matches[i];
                    if (y || !n.namespace && !c.namespace || n.namespace_re && n.namespace_re.test(c.namespace)) n.data = c.data,
                    n.handleObj = c,
                    o = ((v.event.special[c.origType] || {}).handle || c.handler).apply(a.elem, g),
                    o !== t && (n.result = o, o === !1 && (n.preventDefault(), n.stopPropagation()))
                }
            }
            return b.postDispatch && b.postDispatch.call(this, n),
            n.result
        },
        props: "attrChange attrName relatedNode srcElement altKey bubbles cancelable ctrlKey currentTarget eventPhase metaKey relatedTarget shiftKey target timeStamp view which".split(" "),
        fixHooks: {},
        keyHooks: {
            props: "char charCode key keyCode".split(" "),
            filter: function (e, t) {
                return e.which == null && (e.which = t.charCode != null ? t.charCode : t.keyCode),
                e
            }
        },
        mouseHooks: {
            props: "button buttons clientX clientY fromElement offsetX offsetY pageX pageY screenX screenY toElement".split(" "),
            filter: function (e, n) {
                var r, s, o, u = n.button,
                a = n.fromElement;
                return e.pageX == null && n.clientX != null && (r = e.target.ownerDocument || i, s = r.documentElement, o = r.body, e.pageX = n.clientX + (s && s.scrollLeft || o && o.scrollLeft || 0) - (s && s.clientLeft || o && o.clientLeft || 0), e.pageY = n.clientY + (s && s.scrollTop || o && o.scrollTop || 0) - (s && s.clientTop || o && o.clientTop || 0)),
                !e.relatedTarget && a && (e.relatedTarget = a === e.target ? n.toElement : a),
                !e.which && u !== t && (e.which = u & 1 ? 1 : u & 2 ? 3 : u & 4 ? 2 : 0),
                e
            }
        },
        fix: function (e) {
            if (e[v.expando]) return e;
            var t, n, r = e,
            s = v.event.fixHooks[e.type] || {},
            o = s.props ? this.props.concat(s.props) : this.props;
            e = v.Event(r);
            for (t = o.length; t; ) n = o[--t],
            e[n] = r[n];
            return e.target || (e.target = r.srcElement || i),
            e.target.nodeType === 3 && (e.target = e.target.parentNode),
            e.metaKey = !!e.metaKey,
            s.filter ? s.filter(e, r) : e
        },
        special: {
            load: {
                noBubble: !0
            },
            focus: {
                delegateType: "focusin"
            },
            blur: {
                delegateType: "focusout"
            },
            beforeunload: {
                setup: function (e, t, n) {
                    v.isWindow(this) && (this.onbeforeunload = n)
                },
                teardown: function (e, t) {
                    this.onbeforeunload === t && (this.onbeforeunload = null)
                }
            }
        },
        simulate: function (e, t, n, r) {
            var i = v.extend(new v.Event, n, {
                type: e,
                isSimulated: !0,
                originalEvent: {}
            });
            r ? v.event.trigger(i, null, t) : v.event.dispatch.call(t, i),
            i.isDefaultPrevented() && n.preventDefault()
        }
    },
    v.event.handle = v.event.dispatch,
    v.removeEvent = i.removeEventListener ?
    function (e, t, n) {
        e.removeEventListener && e.removeEventListener(t, n, !1)
    } : function (e, t, n) {
        var r = "on" + t;
        e.detachEvent && (typeof e[r] == "undefined" && (e[r] = null), e.detachEvent(r, n))
    },
    v.Event = function (e, t) {
        if (!(this instanceof v.Event)) return new v.Event(e, t);
        e && e.type ? (this.originalEvent = e, this.type = e.type, this.isDefaultPrevented = e.defaultPrevented || e.returnValue === !1 || e.getPreventDefault && e.getPreventDefault() ? tt : et) : this.type = e,
        t && v.extend(this, t),
        this.timeStamp = e && e.timeStamp || v.now(),
        this[v.expando] = !0
    },
    v.Event.prototype = {
        preventDefault: function () {
            this.isDefaultPrevented = tt;
            var e = this.originalEvent;
            if (!e) return;
            e.preventDefault ? e.preventDefault() : e.returnValue = !1
        },
        stopPropagation: function () {
            this.isPropagationStopped = tt;
            var e = this.originalEvent;
            if (!e) return;
            e.stopPropagation && e.stopPropagation(),
            e.cancelBubble = !0
        },
        stopImmediatePropagation: function () {
            this.isImmediatePropagationStopped = tt,
            this.stopPropagation()
        },
        isDefaultPrevented: et,
        isPropagationStopped: et,
        isImmediatePropagationStopped: et
    },
    v.each({
        mouseenter: "mouseover",
        mouseleave: "mouseout"
    },
    function (e, t) {
        v.event.special[e] = {
            delegateType: t,
            bindType: t,
            handle: function (e) {
                var n, r = this,
                i = e.relatedTarget,
                s = e.handleObj,
                o = s.selector;
                if (!i || i !== r && !v.contains(r, i)) e.type = s.origType,
                n = s.handler.apply(this, arguments),
                e.type = t;
                return n
            }
        }
    }),
    v.support.submitBubbles || (v.event.special.submit = {
        setup: function () {
            if (v.nodeName(this, "form")) return !1;
            v.event.add(this, "click._submit keypress._submit",
            function (e) {
                var n = e.target,
                r = v.nodeName(n, "input") || v.nodeName(n, "button") ? n.form : t;
                r && !v._data(r, "_submit_attached") && (v.event.add(r, "submit._submit",
                function (e) {
                    e._submit_bubble = !0
                }), v._data(r, "_submit_attached", !0))
            })
        },
        postDispatch: function (e) {
            e._submit_bubble && (delete e._submit_bubble, this.parentNode && !e.isTrigger && v.event.simulate("submit", this.parentNode, e, !0))
        },
        teardown: function () {
            if (v.nodeName(this, "form")) return !1;
            v.event.remove(this, "._submit")
        }
    }),
    v.support.changeBubbles || (v.event.special.change = {
        setup: function () {
            if ($.test(this.nodeName)) {
                if (this.type === "checkbox" || this.type === "radio") v.event.add(this, "propertychange._change",
                function (e) {
                    e.originalEvent.propertyName === "checked" && (this._just_changed = !0)
                }),
                v.event.add(this, "click._change",
                function (e) {
                    this._just_changed && !e.isTrigger && (this._just_changed = !1),
                    v.event.simulate("change", this, e, !0)
                });
                return !1
            }
            v.event.add(this, "beforeactivate._change",
            function (e) {
                var t = e.target;
                $.test(t.nodeName) && !v._data(t, "_change_attached") && (v.event.add(t, "change._change",
                function (e) {
                    this.parentNode && !e.isSimulated && !e.isTrigger && v.event.simulate("change", this.parentNode, e, !0)
                }), v._data(t, "_change_attached", !0))
            })
        },
        handle: function (e) {
            var t = e.target;
            if (this !== t || e.isSimulated || e.isTrigger || t.type !== "radio" && t.type !== "checkbox") return e.handleObj.handler.apply(this, arguments)
        },
        teardown: function () {
            return v.event.remove(this, "._change"),
            !$.test(this.nodeName)
        }
    }),
    v.support.focusinBubbles || v.each({
        focus: "focusin",
        blur: "focusout"
    },
    function (e, t) {
        var n = 0,
        r = function (e) {
            v.event.simulate(t, e.target, v.event.fix(e), !0)
        };
        v.event.special[t] = {
            setup: function () {
                n++ === 0 && i.addEventListener(e, r, !0)
            },
            teardown: function () {
                --n === 0 && i.removeEventListener(e, r, !0)
            }
        }
    }),
    v.fn.extend({
        on: function (e, n, r, i, s) {
            var o, u;
            if (typeof e == "object") {
                typeof n != "string" && (r = r || n, n = t);
                for (u in e) this.on(u, n, r, e[u], s);
                return this
            }
            r == null && i == null ? (i = n, r = n = t) : i == null && (typeof n == "string" ? (i = r, r = t) : (i = r, r = n, n = t));
            if (i === !1) i = et;
            else if (!i) return this;
            return s === 1 && (o = i, i = function (e) {
                return v().off(e),
                o.apply(this, arguments)
            },
            i.guid = o.guid || (o.guid = v.guid++)),
            this.each(function () {
                v.event.add(this, e, i, r, n)
            })
        },
        one: function (e, t, n, r) {
            return this.on(e, t, n, r, 1)
        },
        off: function (e, n, r) {
            var i, s;
            if (e && e.preventDefault && e.handleObj) return i = e.handleObj,
            v(e.delegateTarget).off(i.namespace ? i.origType + "." + i.namespace : i.origType, i.selector, i.handler),
            this;
            if (typeof e == "object") {
                for (s in e) this.off(s, n, e[s]);
                return this
            }
            if (n === !1 || typeof n == "function") r = n,
            n = t;
            return r === !1 && (r = et),
            this.each(function () {
                v.event.remove(this, e, r, n)
            })
        },
        bind: function (e, t, n) {
            return this.on(e, null, t, n)
        },
        unbind: function (e, t) {
            return this.off(e, null, t)
        },
        live: function (e, t, n) {
            return v(this.context).on(e, this.selector, t, n),
            this
        },
        die: function (e, t) {
            return v(this.context).off(e, this.selector || "**", t),
            this
        },
        delegate: function (e, t, n, r) {
            return this.on(t, e, n, r)
        },
        undelegate: function (e, t, n) {
            return arguments.length === 1 ? this.off(e, "**") : this.off(t, e || "**", n)
        },
        trigger: function (e, t) {
            return this.each(function () {
                v.event.trigger(e, t, this)
            })
        },
        triggerHandler: function (e, t) {
            if (this[0]) return v.event.trigger(e, t, this[0], !0)
        },
        toggle: function (e) {
            var t = arguments,
            n = e.guid || v.guid++,
            r = 0,
            i = function (n) {
                var i = (v._data(this, "lastToggle" + e.guid) || 0) % r;
                return v._data(this, "lastToggle" + e.guid, i + 1),
                n.preventDefault(),
                t[i].apply(this, arguments) || !1
            };
            i.guid = n;
            while (r < t.length) t[r++].guid = n;
            return this.click(i)
        },
        hover: function (e, t) {
            return this.mouseenter(e).mouseleave(t || e)
        }
    }),
    v.each("blur focus focusin focusout load resize scroll unload click dblclick mousedown mouseup mousemove mouseover mouseout mouseenter mouseleave change select submit keydown keypress keyup error contextmenu".split(" "),
    function (e, t) {
        v.fn[t] = function (e, n) {
            return n == null && (n = e, e = null),
            arguments.length > 0 ? this.on(t, null, e, n) : this.trigger(t)
        },
        Q.test(t) && (v.event.fixHooks[t] = v.event.keyHooks),
        G.test(t) && (v.event.fixHooks[t] = v.event.mouseHooks)
    }),
    function (e, t) {
        function nt(e, t, n, r) {
            n = n || [],
            t = t || g;
            var i, s, a, f, l = t.nodeType;
            if (!e || typeof e != "string") return n;
            if (l !== 1 && l !== 9) return [];
            a = o(t);
            if (!a && !r) if (i = R.exec(e)) if (f = i[1]) {
                if (l === 9) {
                    s = t.getElementById(f);
                    if (!s || !s.parentNode) return n;
                    if (s.id === f) return n.push(s),
                    n
                } else if (t.ownerDocument && (s = t.ownerDocument.getElementById(f)) && u(t, s) && s.id === f) return n.push(s),
                n
            } else {
                if (i[2]) return S.apply(n, x.call(t.getElementsByTagName(e), 0)),
                n;
                if ((f = i[3]) && Z && t.getElementsByClassName) return S.apply(n, x.call(t.getElementsByClassName(f), 0)),
                n
            }
            return vt(e.replace(j, "$1"), t, n, r, a)
        }
        function rt(e) {
            return function (t) {
                var n = t.nodeName.toLowerCase();
                return n === "input" && t.type === e
            }
        }
        function it(e) {
            return function (t) {
                var n = t.nodeName.toLowerCase();
                return (n === "input" || n === "button") && t.type === e
            }
        }
        function st(e) {
            return N(function (t) {
                return t = +t,
                N(function (n, r) {
                    var i, s = e([], n.length, t),
                    o = s.length;
                    while (o--) n[i = s[o]] && (n[i] = !(r[i] = n[i]))
                })
            })
        }
        function ot(e, t, n) {
            if (e === t) return n;
            var r = e.nextSibling;
            while (r) {
                if (r === t) return -1;
                r = r.nextSibling
            }
            return 1
        }
        function ut(e, t) {
            var n, r, s, o, u, a, f, l = L[d][e + " "];
            if (l) return t ? 0 : l.slice(0);
            u = e,
            a = [],
            f = i.preFilter;
            while (u) {
                if (!n || (r = F.exec(u))) r && (u = u.slice(r[0].length) || u),
                a.push(s = []);
                n = !1;
                if (r = I.exec(u)) s.push(n = new m(r.shift())),
                u = u.slice(n.length),
                n.type = r[0].replace(j, " ");
                for (o in i.filter) (r = J[o].exec(u)) && (!f[o] || (r = f[o](r))) && (s.push(n = new m(r.shift())), u = u.slice(n.length), n.type = o, n.matches = r);
                if (!n) break
            }
            return t ? u.length : u ? nt.error(e) : L(e, a).slice(0)
        }
        function at(e, t, r) {
            var i = t.dir,
            s = r && t.dir === "parentNode",
            o = w++;
            return t.first ?
            function (t, n, r) {
                while (t = t[i]) if (s || t.nodeType === 1) return e(t, n, r)
            } : function (t, r, u) {
                if (!u) {
                    var a, f = b + " " + o + " ",
                    l = f + n;
                    while (t = t[i]) if (s || t.nodeType === 1) {
                        if ((a = t[d]) === l) return t.sizset;
                        if (typeof a == "string" && a.indexOf(f) === 0) {
                            if (t.sizset) return t
                        } else {
                            t[d] = l;
                            if (e(t, r, u)) return t.sizset = !0,
                            t;
                            t.sizset = !1
                        }
                    }
                } else while (t = t[i]) if (s || t.nodeType === 1) if (e(t, r, u)) return t
            }
        }
        function ft(e) {
            return e.length > 1 ?
            function (t, n, r) {
                var i = e.length;
                while (i--) if (!e[i](t, n, r)) return !1;
                return !0
            } : e[0]
        }
        function lt(e, t, n, r, i) {
            var s, o = [],
            u = 0,
            a = e.length,
            f = t != null;
            for (; u < a; u++) if (s = e[u]) if (!n || n(s, r, i)) o.push(s),
            f && t.push(u);
            return o
        }
        function ct(e, t, n, r, i, s) {
            return r && !r[d] && (r = ct(r)),
            i && !i[d] && (i = ct(i, s)),
            N(function (s, o, u, a) {
                var f, l, c, h = [],
                p = [],
                d = o.length,
                v = s || dt(t || "*", u.nodeType ? [u] : u, []),
                m = e && (s || !t) ? lt(v, h, e, u, a) : v,
                g = n ? i || (s ? e : d || r) ? [] : o : m;
                n && n(m, g, u, a);
                if (r) {
                    f = lt(g, p),
                    r(f, [], u, a),
                    l = f.length;
                    while (l--) if (c = f[l]) g[p[l]] = !(m[p[l]] = c)
                }
                if (s) {
                    if (i || e) {
                        if (i) {
                            f = [],
                            l = g.length;
                            while (l--) (c = g[l]) && f.push(m[l] = c);
                            i(null, g = [], f, a)
                        }
                        l = g.length;
                        while (l--) (c = g[l]) && (f = i ? T.call(s, c) : h[l]) > -1 && (s[f] = !(o[f] = c))
                    }
                } else g = lt(g === o ? g.splice(d, g.length) : g),
                i ? i(null, o, g, a) : S.apply(o, g)
            })
        }
        function ht(e) {
            var t, n, r, s = e.length,
            o = i.relative[e[0].type],
            u = o || i.relative[" "],
            a = o ? 1 : 0,
            f = at(function (e) {
                return e === t
            },
            u, !0),
            l = at(function (e) {
                return T.call(t, e) > -1
            },
            u, !0),
            h = [function (e, n, r) {
                return !o && (r || n !== c) || ((t = n).nodeType ? f(e, n, r) : l(e, n, r))
            } ];
            for (; a < s; a++) if (n = i.relative[e[a].type]) h = [at(ft(h), n)];
            else {
                n = i.filter[e[a].type].apply(null, e[a].matches);
                if (n[d]) {
                    r = ++a;
                    for (; r < s; r++) if (i.relative[e[r].type]) break;
                    return ct(a > 1 && ft(h), a > 1 && e.slice(0, a - 1).join("").replace(j, "$1"), n, a < r && ht(e.slice(a, r)), r < s && ht(e = e.slice(r)), r < s && e.join(""))
                }
                h.push(n)
            }
            return ft(h)
        }
        function pt(e, t) {
            var r = t.length > 0,
            s = e.length > 0,
            o = function (u, a, f, l, h) {
                var p, d, v, m = [],
                y = 0,
                w = "0",
                x = u && [],
                T = h != null,
                N = c,
                C = u || s && i.find.TAG("*", h && a.parentNode || a),
                k = b += N == null ? 1 : Math.E;
                T && (c = a !== g && a, n = o.el);
                for (; (p = C[w]) != null; w++) {
                    if (s && p) {
                        for (d = 0; v = e[d]; d++) if (v(p, a, f)) {
                            l.push(p);
                            break
                        }
                        T && (b = k, n = ++o.el)
                    }
                    r && ((p = !v && p) && y--, u && x.push(p))
                }
                y += w;
                if (r && w !== y) {
                    for (d = 0; v = t[d]; d++) v(x, m, a, f);
                    if (u) {
                        if (y > 0) while (w--) !x[w] && !m[w] && (m[w] = E.call(l));
                        m = lt(m)
                    }
                    S.apply(l, m),
                    T && !u && m.length > 0 && y + t.length > 1 && nt.uniqueSort(l)
                }
                return T && (b = k, c = N),
                x
            };
            return o.el = 0,
            r ? N(o) : o
        }
        function dt(e, t, n) {
            var r = 0,
            i = t.length;
            for (; r < i; r++) nt(e, t[r], n);
            return n
        }
        function vt(e, t, n, r, s) {
            var o, u, f, l, c, h = ut(e),
            p = h.length;
            if (!r && h.length === 1) {
                u = h[0] = h[0].slice(0);
                if (u.length > 2 && (f = u[0]).type === "ID" && t.nodeType === 9 && !s && i.relative[u[1].type]) {
                    t = i.find.ID(f.matches[0].replace($, ""), t, s)[0];
                    if (!t) return n;
                    e = e.slice(u.shift().length)
                }
                for (o = J.POS.test(e) ? -1 : u.length - 1; o >= 0; o--) {
                    f = u[o];
                    if (i.relative[l = f.type]) break;
                    if (c = i.find[l]) if (r = c(f.matches[0].replace($, ""), z.test(u[0].type) && t.parentNode || t, s)) {
                        u.splice(o, 1),
                        e = r.length && u.join("");
                        if (!e) return S.apply(n, x.call(r, 0)),
                        n;
                        break
                    }
                }
            }
            return a(e, h)(r, t, s, n, z.test(e)),
            n
        }
        function mt() { }
        var n, r, i, s, o, u, a, f, l, c, h = !0,
        p = "undefined",
        d = ("sizcache" + Math.random()).replace(".", ""),
        m = String,
        g = e.document,
        y = g.documentElement,
        b = 0,
        w = 0,
        E = [].pop,
        S = [].push,
        x = [].slice,
        T = [].indexOf ||
        function (e) {
            var t = 0,
            n = this.length;
            for (; t < n; t++) if (this[t] === e) return t;
            return -1
        },
        N = function (e, t) {
            return e[d] = t == null || t,
            e
        },
        C = function () {
            var e = {},
            t = [];
            return N(function (n, r) {
                return t.push(n) > i.cacheLength && delete e[t.shift()],
                e[n + " "] = r
            },
            e)
        },
        k = C(),
        L = C(),
        A = C(),
        O = "[\\x20\\t\\r\\n\\f]",
        M = "(?:\\\\.|[-\\w]|[^\\x00-\\xa0])+",
        _ = M.replace("w", "w#"),
        D = "([*^$|!~]?=)",
        P = "\\[" + O + "*(" + M + ")" + O + "*(?:" + D + O + "*(?:(['\"])((?:\\\\.|[^\\\\])*?)\\3|(" + _ + ")|)|)" + O + "*\\]",
        H = ":(" + M + ")(?:\\((?:(['\"])((?:\\\\.|[^\\\\])*?)\\2|([^()[\\]]*|(?:(?:" + P + ")|[^:]|\\\\.)*|.*))\\)|)",
        B = ":(even|odd|eq|gt|lt|nth|first|last)(?:\\(" + O + "*((?:-\\d)?\\d*)" + O + "*\\)|)(?=[^-]|$)",
        j = new RegExp("^" + O + "+|((?:^|[^\\\\])(?:\\\\.)*)" + O + "+$", "g"),
        F = new RegExp("^" + O + "*," + O + "*"),
        I = new RegExp("^" + O + "*([\\x20\\t\\r\\n\\f>+~])" + O + "*"),
        q = new RegExp(H),
        R = /^(?:#([\w\-]+)|(\w+)|\.([\w\-]+))$/,
        U = /^:not/,
        z = /[\x20\t\r\n\f]*[+~]/,
        W = /:not\($/,
        X = /h\d/i,
        V = /input|select|textarea|button/i,
        $ = /\\(?!\\)/g,
        J = {
            ID: new RegExp("^#(" + M + ")"),
            CLASS: new RegExp("^\\.(" + M + ")"),
            NAME: new RegExp("^\\[name=['\"]?(" + M + ")['\"]?\\]"),
            TAG: new RegExp("^(" + M.replace("w", "w*") + ")"),
            ATTR: new RegExp("^" + P),
            PSEUDO: new RegExp("^" + H),
            POS: new RegExp(B, "i"),
            CHILD: new RegExp("^:(only|nth|first|last)-child(?:\\(" + O + "*(even|odd|(([+-]|)(\\d*)n|)" + O + "*(?:([+-]|)" + O + "*(\\d+)|))" + O + "*\\)|)", "i"),
            needsContext: new RegExp("^" + O + "*[>+~]|" + B, "i")
        },
        K = function (e) {
            var t = g.createElement("div");
            try {
                return e(t)
            } catch (n) {
                return !1
            } finally {
                t = null
            }
        },
        Q = K(function (e) {
            return e.appendChild(g.createComment("")),
            !e.getElementsByTagName("*").length
        }),
        G = K(function (e) {
            return e.innerHTML = "<a href='#'></a>",
            e.firstChild && typeof e.firstChild.getAttribute !== p && e.firstChild.getAttribute("href") === "#"
        }),
        Y = K(function (e) {
            e.innerHTML = "<select></select>";
            var t = typeof e.lastChild.getAttribute("multiple");
            return t !== "boolean" && t !== "string"
        }),
        Z = K(function (e) {
            return e.innerHTML = "<div class='hidden e'></div><div class='hidden'></div>",
            !e.getElementsByClassName || !e.getElementsByClassName("e").length ? !1 : (e.lastChild.className = "e", e.getElementsByClassName("e").length === 2)
        }),
        et = K(function (e) {
            e.id = d + 0,
            e.innerHTML = "<a name='" + d + "'></a><div name='" + d + "'></div>",
            y.insertBefore(e, y.firstChild);
            var t = g.getElementsByName && g.getElementsByName(d).length === 2 + g.getElementsByName(d + 0).length;
            return r = !g.getElementById(d),
            y.removeChild(e),
            t
        });
        try {
            x.call(y.childNodes, 0)[0].nodeType
        } catch (tt) {
            x = function (e) {
                var t, n = [];
                for (; t = this[e]; e++) n.push(t);
                return n
            }
        }
        nt.matches = function (e, t) {
            return nt(e, null, null, t)
        },
        nt.matchesSelector = function (e, t) {
            return nt(t, null, null, [e]).length > 0
        },
        s = nt.getText = function (e) {
            var t, n = "",
            r = 0,
            i = e.nodeType;
            if (i) {
                if (i === 1 || i === 9 || i === 11) {
                    if (typeof e.textContent == "string") return e.textContent;
                    for (e = e.firstChild; e; e = e.nextSibling) n += s(e)
                } else if (i === 3 || i === 4) return e.nodeValue
            } else for (; t = e[r]; r++) n += s(t);
            return n
        },
        o = nt.isXML = function (e) {
            var t = e && (e.ownerDocument || e).documentElement;
            return t ? t.nodeName !== "HTML" : !1
        },
        u = nt.contains = y.contains ?
        function (e, t) {
            var n = e.nodeType === 9 ? e.documentElement : e,
            r = t && t.parentNode;
            return e === r || !!(r && r.nodeType === 1 && n.contains && n.contains(r))
        } : y.compareDocumentPosition ?
        function (e, t) {
            return t && !!(e.compareDocumentPosition(t) & 16)
        } : function (e, t) {
            while (t = t.parentNode) if (t === e) return !0;
            return !1
        },
        nt.attr = function (e, t) {
            var n, r = o(e);
            return r || (t = t.toLowerCase()),
            (n = i.attrHandle[t]) ? n(e) : r || Y ? e.getAttribute(t) : (n = e.getAttributeNode(t), n ? typeof e[t] == "boolean" ? e[t] ? t : null : n.specified ? n.value : null : null)
        },
        i = nt.selectors = {
            cacheLength: 50,
            createPseudo: N,
            match: J,
            attrHandle: G ? {} : {
                href: function (e) {
                    return e.getAttribute("href", 2)
                },
                type: function (e) {
                    return e.getAttribute("type")
                }
            },
            find: {
                ID: r ?
                function (e, t, n) {
                    if (typeof t.getElementById !== p && !n) {
                        var r = t.getElementById(e);
                        return r && r.parentNode ? [r] : []
                    }
                } : function (e, n, r) {
                    if (typeof n.getElementById !== p && !r) {
                        var i = n.getElementById(e);
                        return i ? i.id === e || typeof i.getAttributeNode !== p && i.getAttributeNode("id").value === e ? [i] : t : []
                    }
                },
                TAG: Q ?
                function (e, t) {
                    if (typeof t.getElementsByTagName !== p) return t.getElementsByTagName(e)
                } : function (e, t) {
                    var n = t.getElementsByTagName(e);
                    if (e === "*") {
                        var r, i = [],
                        s = 0;
                        for (; r = n[s]; s++) r.nodeType === 1 && i.push(r);
                        return i
                    }
                    return n
                },
                NAME: et &&
                function (e, t) {
                    if (typeof t.getElementsByName !== p) return t.getElementsByName(name)
                },
                CLASS: Z &&
                function (e, t, n) {
                    if (typeof t.getElementsByClassName !== p && !n) return t.getElementsByClassName(e)
                }
            },
            relative: {
                ">": {
                    dir: "parentNode",
                    first: !0
                },
                " ": {
                    dir: "parentNode"
                },
                "+": {
                    dir: "previousSibling",
                    first: !0
                },
                "~": {
                    dir: "previousSibling"
                }
            },
            preFilter: {
                ATTR: function (e) {
                    return e[1] = e[1].replace($, ""),
                    e[3] = (e[4] || e[5] || "").replace($, ""),
                    e[2] === "~=" && (e[3] = " " + e[3] + " "),
                    e.slice(0, 4)
                },
                CHILD: function (e) {
                    return e[1] = e[1].toLowerCase(),
                    e[1] === "nth" ? (e[2] || nt.error(e[0]), e[3] = +(e[3] ? e[4] + (e[5] || 1) : 2 * (e[2] === "even" || e[2] === "odd")), e[4] = +(e[6] + e[7] || e[2] === "odd")) : e[2] && nt.error(e[0]),
                    e
                },
                PSEUDO: function (e) {
                    var t, n;
                    if (J.CHILD.test(e[0])) return null;
                    if (e[3]) e[2] = e[3];
                    else if (t = e[4]) q.test(t) && (n = ut(t, !0)) && (n = t.indexOf(")", t.length - n) - t.length) && (t = t.slice(0, n), e[0] = e[0].slice(0, n)),
                    e[2] = t;
                    return e.slice(0, 3)
                }
            },
            filter: {
                ID: r ?
                function (e) {
                    return e = e.replace($, ""),
                    function (t) {
                        return t.getAttribute("id") === e
                    }
                } : function (e) {
                    return e = e.replace($, ""),
                    function (t) {
                        var n = typeof t.getAttributeNode !== p && t.getAttributeNode("id");
                        return n && n.value === e
                    }
                },
                TAG: function (e) {
                    return e === "*" ?
                    function () {
                        return !0
                    } : (e = e.replace($, "").toLowerCase(),
                    function (t) {
                        return t.nodeName && t.nodeName.toLowerCase() === e
                    })
                },
                CLASS: function (e) {
                    var t = k[d][e + " "];
                    return t || (t = new RegExp("(^|" + O + ")" + e + "(" + O + "|$)")) && k(e,
                    function (e) {
                        return t.test(e.className || typeof e.getAttribute !== p && e.getAttribute("class") || "")
                    })
                },
                ATTR: function (e, t, n) {
                    return function (r, i) {
                        var s = nt.attr(r, e);
                        return s == null ? t === "!=" : t ? (s += "", t === "=" ? s === n : t === "!=" ? s !== n : t === "^=" ? n && s.indexOf(n) === 0 : t === "*=" ? n && s.indexOf(n) > -1 : t === "$=" ? n && s.substr(s.length - n.length) === n : t === "~=" ? (" " + s + " ").indexOf(n) > -1 : t === "|=" ? s === n || s.substr(0, n.length + 1) === n + "-" : !1) : !0
                    }
                },
                CHILD: function (e, t, n, r) {
                    return e === "nth" ?
                    function (e) {
                        var t, i, s = e.parentNode;
                        if (n === 1 && r === 0) return !0;
                        if (s) {
                            i = 0;
                            for (t = s.firstChild; t; t = t.nextSibling) if (t.nodeType === 1) {
                                i++;
                                if (e === t) break
                            }
                        }
                        return i -= r,
                        i === n || i % n === 0 && i / n >= 0
                    } : function (t) {
                        var n = t;
                        switch (e) {
                            case "only":
                            case "first":
                                while (n = n.previousSibling) if (n.nodeType === 1) return !1;
                                if (e === "first") return !0;
                                n = t;
                            case "last":
                                while (n = n.nextSibling) if (n.nodeType === 1) return !1;
                                return !0
                        }
                    }
                },
                PSEUDO: function (e, t) {
                    var n, r = i.pseudos[e] || i.setFilters[e.toLowerCase()] || nt.error("unsupported pseudo: " + e);
                    return r[d] ? r(t) : r.length > 1 ? (n = [e, e, "", t], i.setFilters.hasOwnProperty(e.toLowerCase()) ? N(function (e, n) {
                        var i, s = r(e, t),
                        o = s.length;
                        while (o--) i = T.call(e, s[o]),
                        e[i] = !(n[i] = s[o])
                    }) : function (e) {
                        return r(e, 0, n)
                    }) : r
                }
            },
            pseudos: {
                not: N(function (e) {
                    var t = [],
                    n = [],
                    r = a(e.replace(j, "$1"));
                    return r[d] ? N(function (e, t, n, i) {
                        var s, o = r(e, null, i, []),
                        u = e.length;
                        while (u--) if (s = o[u]) e[u] = !(t[u] = s)
                    }) : function (e, i, s) {
                        return t[0] = e,
                        r(t, null, s, n),
                        !n.pop()
                    }
                }),
                has: N(function (e) {
                    return function (t) {
                        return nt(e, t).length > 0
                    }
                }),
                contains: N(function (e) {
                    return function (t) {
                        return (t.textContent || t.innerText || s(t)).indexOf(e) > -1
                    }
                }),
                enabled: function (e) {
                    return e.disabled === !1
                },
                disabled: function (e) {
                    return e.disabled === !0
                },
                checked: function (e) {
                    var t = e.nodeName.toLowerCase();
                    return t === "input" && !!e.checked || t === "option" && !!e.selected
                },
                selected: function (e) {
                    return e.parentNode && e.parentNode.selectedIndex,
                    e.selected === !0
                },
                parent: function (e) {
                    return !i.pseudos.empty(e)
                },
                empty: function (e) {
                    var t;
                    e = e.firstChild;
                    while (e) {
                        if (e.nodeName > "@" || (t = e.nodeType) === 3 || t === 4) return !1;
                        e = e.nextSibling
                    }
                    return !0
                },
                header: function (e) {
                    return X.test(e.nodeName)
                },
                text: function (e) {
                    var t, n;
                    return e.nodeName.toLowerCase() === "input" && (t = e.type) === "text" && ((n = e.getAttribute("type")) == null || n.toLowerCase() === t)
                },
                radio: rt("radio"),
                checkbox: rt("checkbox"),
                file: rt("file"),
                password: rt("password"),
                image: rt("image"),
                submit: it("submit"),
                reset: it("reset"),
                button: function (e) {
                    var t = e.nodeName.toLowerCase();
                    return t === "input" && e.type === "button" || t === "button"
                },
                input: function (e) {
                    return V.test(e.nodeName)
                },
                focus: function (e) {
                    var t = e.ownerDocument;
                    return e === t.activeElement && (!t.hasFocus || t.hasFocus()) && !!(e.type || e.href || ~e.tabIndex)
                },
                active: function (e) {
                    return e === e.ownerDocument.activeElement
                },
                first: st(function () {
                    return [0]
                }),
                last: st(function (e, t) {
                    return [t - 1]
                }),
                eq: st(function (e, t, n) {
                    return [n < 0 ? n + t : n]
                }),
                even: st(function (e, t) {
                    for (var n = 0; n < t; n += 2) e.push(n);
                    return e
                }),
                odd: st(function (e, t) {
                    for (var n = 1; n < t; n += 2) e.push(n);
                    return e
                }),
                lt: st(function (e, t, n) {
                    for (var r = n < 0 ? n + t : n; --r >= 0; ) e.push(r);
                    return e
                }),
                gt: st(function (e, t, n) {
                    for (var r = n < 0 ? n + t : n; ++r < t; ) e.push(r);
                    return e
                })
            }
        },
        f = y.compareDocumentPosition ?
        function (e, t) {
            return e === t ? (l = !0, 0) : (!e.compareDocumentPosition || !t.compareDocumentPosition ? e.compareDocumentPosition : e.compareDocumentPosition(t) & 4) ? -1 : 1
        } : function (e, t) {
            if (e === t) return l = !0,
            0;
            if (e.sourceIndex && t.sourceIndex) return e.sourceIndex - t.sourceIndex;
            var n, r, i = [],
            s = [],
            o = e.parentNode,
            u = t.parentNode,
            a = o;
            if (o === u) return ot(e, t);
            if (!o) return -1;
            if (!u) return 1;
            while (a) i.unshift(a),
            a = a.parentNode;
            a = u;
            while (a) s.unshift(a),
            a = a.parentNode;
            n = i.length,
            r = s.length;
            for (var f = 0; f < n && f < r; f++) if (i[f] !== s[f]) return ot(i[f], s[f]);
            return f === n ? ot(e, s[f], -1) : ot(i[f], t, 1)
        },
        [0, 0].sort(f),
        h = !l,
        nt.uniqueSort = function (e) {
            var t, n = [],
            r = 1,
            i = 0;
            l = h,
            e.sort(f);
            if (l) {
                for (; t = e[r]; r++) t === e[r - 1] && (i = n.push(r));
                while (i--) e.splice(n[i], 1)
            }
            return e
        },
        nt.error = function (e) {
            throw new Error("Syntax error, unrecognized expression: " + e)
        },
        a = nt.compile = function (e, t) {
            var n, r = [],
            i = [],
            s = A[d][e + " "];
            if (!s) {
                t || (t = ut(e)),
                n = t.length;
                while (n--) s = ht(t[n]),
                s[d] ? r.push(s) : i.push(s);
                s = A(e, pt(i, r))
            }
            return s
        },
        g.querySelectorAll &&
        function () {
            var e, t = vt,
            n = /'|\\/g,
            r = /\=[\x20\t\r\n\f]*([^'"\]]*)[\x20\t\r\n\f]*\]/g,
            i = [":focus"],
            s = [":active"],
            u = y.matchesSelector || y.mozMatchesSelector || y.webkitMatchesSelector || y.oMatchesSelector || y.msMatchesSelector;
            K(function (e) {
                e.innerHTML = "<select><option selected=''></option></select>",
                e.querySelectorAll("[selected]").length || i.push("\\[" + O + "*(?:checked|disabled|ismap|multiple|readonly|selected|value)"),
                e.querySelectorAll(":checked").length || i.push(":checked")
            }),
            K(function (e) {
                e.innerHTML = "<p test=''></p>",
                e.querySelectorAll("[test^='']").length && i.push("[*^$]=" + O + "*(?:\"\"|'')"),
                e.innerHTML = "<input type='hidden'/>",
                e.querySelectorAll(":enabled").length || i.push(":enabled", ":disabled")
            }),
            i = new RegExp(i.join("|")),
            vt = function (e, r, s, o, u) {
                if (!o && !u && !i.test(e)) {
                    var a, f, l = !0,
                    c = d,
                    h = r,
                    p = r.nodeType === 9 && e;
                    if (r.nodeType === 1 && r.nodeName.toLowerCase() !== "object") {
                        a = ut(e),
                        (l = r.getAttribute("id")) ? c = l.replace(n, "\\$&") : r.setAttribute("id", c),
                        c = "[id='" + c + "'] ",
                        f = a.length;
                        while (f--) a[f] = c + a[f].join("");
                        h = z.test(e) && r.parentNode || r,
                        p = a.join(",")
                    }
                    if (p) try {
                        return S.apply(s, x.call(h.querySelectorAll(p), 0)),
                        s
                    } catch (v) { } finally {
                        l || r.removeAttribute("id")
                    }
                }
                return t(e, r, s, o, u)
            },
            u && (K(function (t) {
                e = u.call(t, "div");
                try {
                    u.call(t, "[test!='']:sizzle"),
                    s.push("!=", H)
                } catch (n) { }
            }), s = new RegExp(s.join("|")), nt.matchesSelector = function (t, n) {
                n = n.replace(r, "='$1']");
                if (!o(t) && !s.test(n) && !i.test(n)) try {
                    var a = u.call(t, n);
                    if (a || e || t.document && t.document.nodeType !== 11) return a
                } catch (f) { }
                return nt(n, null, null, [t]).length > 0
            })
        } (),
        i.pseudos.nth = i.pseudos.eq,
        i.filters = mt.prototype = i.pseudos,
        i.setFilters = new mt,
        nt.attr = v.attr,
        v.find = nt,
        v.expr = nt.selectors,
        v.expr[":"] = v.expr.pseudos,
        v.unique = nt.uniqueSort,
        v.text = nt.getText,
        v.isXMLDoc = nt.isXML,
        v.contains = nt.contains
    } (e);
    var nt = /Until$/,
    rt = /^(?:parents|prev(?:Until|All))/,
    it = /^.[^:#\[\.,]*$/,
    st = v.expr.match.needsContext,
    ot = {
        children: !0,
        contents: !0,
        next: !0,
        prev: !0
    };
    v.fn.extend({
        find: function (e) {
            var t, n, r, i, s, o, u = this;
            if (typeof e != "string") return v(e).filter(function () {
                for (t = 0, n = u.length; t < n; t++) if (v.contains(u[t], this)) return !0
            });
            o = this.pushStack("", "find", e);
            for (t = 0, n = this.length; t < n; t++) {
                r = o.length,
                v.find(e, this[t], o);
                if (t > 0) for (i = r; i < o.length; i++) for (s = 0; s < r; s++) if (o[s] === o[i]) {
                    o.splice(i--, 1);
                    break
                }
            }
            return o
        },
        has: function (e) {
            var t, n = v(e, this),
            r = n.length;
            return this.filter(function () {
                for (t = 0; t < r; t++) if (v.contains(this, n[t])) return !0
            })
        },
        not: function (e) {
            return this.pushStack(ft(this, e, !1), "not", e)
        },
        filter: function (e) {
            return this.pushStack(ft(this, e, !0), "filter", e)
        },
        is: function (e) {
            return !!e && (typeof e == "string" ? st.test(e) ? v(e, this.context).index(this[0]) >= 0 : v.filter(e, this).length > 0 : this.filter(e).length > 0)
        },
        closest: function (e, t) {
            var n, r = 0,
            i = this.length,
            s = [],
            o = st.test(e) || typeof e != "string" ? v(e, t || this.context) : 0;
            for (; r < i; r++) {
                n = this[r];
                while (n && n.ownerDocument && n !== t && n.nodeType !== 11) {
                    if (o ? o.index(n) > -1 : v.find.matchesSelector(n, e)) {
                        s.push(n);
                        break
                    }
                    n = n.parentNode
                }
            }
            return s = s.length > 1 ? v.unique(s) : s,
            this.pushStack(s, "closest", e)
        },
        index: function (e) {
            return e ? typeof e == "string" ? v.inArray(this[0], v(e)) : v.inArray(e.jquery ? e[0] : e, this) : this[0] && this[0].parentNode ? this.prevAll().length : -1
        },
        add: function (e, t) {
            var n = typeof e == "string" ? v(e, t) : v.makeArray(e && e.nodeType ? [e] : e),
            r = v.merge(this.get(), n);
            return this.pushStack(ut(n[0]) || ut(r[0]) ? r : v.unique(r))
        },
        addBack: function (e) {
            return this.add(e == null ? this.prevObject : this.prevObject.filter(e))
        }
    }),
    v.fn.andSelf = v.fn.addBack,
    v.each({
        parent: function (e) {
            var t = e.parentNode;
            return t && t.nodeType !== 11 ? t : null
        },
        parents: function (e) {
            return v.dir(e, "parentNode")
        },
        parentsUntil: function (e, t, n) {
            return v.dir(e, "parentNode", n)
        },
        next: function (e) {
            return at(e, "nextSibling")
        },
        prev: function (e) {
            return at(e, "previousSibling")
        },
        nextAll: function (e) {
            return v.dir(e, "nextSibling")
        },
        prevAll: function (e) {
            return v.dir(e, "previousSibling")
        },
        nextUntil: function (e, t, n) {
            return v.dir(e, "nextSibling", n)
        },
        prevUntil: function (e, t, n) {
            return v.dir(e, "previousSibling", n)
        },
        siblings: function (e) {
            return v.sibling((e.parentNode || {}).firstChild, e)
        },
        children: function (e) {
            return v.sibling(e.firstChild)
        },
        contents: function (e) {
            return v.nodeName(e, "iframe") ? e.contentDocument || e.contentWindow.document : v.merge([], e.childNodes)
        }
    },
    function (e, t) {
        v.fn[e] = function (n, r) {
            var i = v.map(this, t, n);
            return nt.test(e) || (r = n),
            r && typeof r == "string" && (i = v.filter(r, i)),
            i = this.length > 1 && !ot[e] ? v.unique(i) : i,
            this.length > 1 && rt.test(e) && (i = i.reverse()),
            this.pushStack(i, e, l.call(arguments).join(","))
        }
    }),
    v.extend({
        filter: function (e, t, n) {
            return n && (e = ":not(" + e + ")"),
            t.length === 1 ? v.find.matchesSelector(t[0], e) ? [t[0]] : [] : v.find.matches(e, t)
        },
        dir: function (e, n, r) {
            var i = [],
            s = e[n];
            while (s && s.nodeType !== 9 && (r === t || s.nodeType !== 1 || !v(s).is(r))) s.nodeType === 1 && i.push(s),
            s = s[n];
            return i
        },
        sibling: function (e, t) {
            var n = [];
            for (; e; e = e.nextSibling) e.nodeType === 1 && e !== t && n.push(e);
            return n
        }
    });
    var ct = "abbr|article|aside|audio|bdi|canvas|data|datalist|details|figcaption|figure|footer|header|hgroup|mark|meter|nav|output|progress|section|summary|time|video",
    ht = / jQuery\d+="(?:null|\d+)"/g,
    pt = /^\s+/,
    dt = /<(?!area|br|col|embed|hr|img|input|link|meta|param)(([\w:]+)[^>]*)\/>/gi,
    vt = /<([\w:]+)/,
    mt = /<tbody/i,
    gt = /<|&#?\w+;/,
    yt = /<(?:script|style|link)/i,
    bt = /<(?:script|object|embed|option|style)/i,
    wt = new RegExp("<(?:" + ct + ")[\\s/>]", "i"),
    Et = /^(?:checkbox|radio)$/,
    St = /checked\s*(?:[^=]|=\s*.checked.)/i,
    xt = /\/(java|ecma)script/i,
    Tt = /^\s*<!(?:\[CDATA\[|\-\-)|[\]\-]{2}>\s*$/g,
    Nt = {
        option: [1, "<select multiple='multiple'>", "</select>"],
        legend: [1, "<fieldset>", "</fieldset>"],
        thead: [1, "<table>", "</table>"],
        tr: [2, "<table><tbody>", "</tbody></table>"],
        td: [3, "<table><tbody><tr>", "</tr></tbody></table>"],
        col: [2, "<table><tbody></tbody><colgroup>", "</colgroup></table>"],
        area: [1, "<map>", "</map>"],
        _default: [0, "", ""]
    },
    Ct = lt(i),
    kt = Ct.appendChild(i.createElement("div"));
    Nt.optgroup = Nt.option,
    Nt.tbody = Nt.tfoot = Nt.colgroup = Nt.caption = Nt.thead,
    Nt.th = Nt.td,
    v.support.htmlSerialize || (Nt._default = [1, "X<div>", "</div>"]),
    v.fn.extend({
        text: function (e) {
            return v.access(this,
            function (e) {
                return e === t ? v.text(this) : this.empty().append((this[0] && this[0].ownerDocument || i).createTextNode(e))
            },
            null, e, arguments.length)
        },
        wrapAll: function (e) {
            if (v.isFunction(e)) return this.each(function (t) {
                v(this).wrapAll(e.call(this, t))
            });
            if (this[0]) {
                var t = v(e, this[0].ownerDocument).eq(0).clone(!0);
                this[0].parentNode && t.insertBefore(this[0]),
                t.map(function () {
                    var e = this;
                    while (e.firstChild && e.firstChild.nodeType === 1) e = e.firstChild;
                    return e
                }).append(this)
            }
            return this
        },
        wrapInner: function (e) {
            return v.isFunction(e) ? this.each(function (t) {
                v(this).wrapInner(e.call(this, t))
            }) : this.each(function () {
                var t = v(this),
                n = t.contents();
                n.length ? n.wrapAll(e) : t.append(e)
            })
        },
        wrap: function (e) {
            var t = v.isFunction(e);
            return this.each(function (n) {
                v(this).wrapAll(t ? e.call(this, n) : e)
            })
        },
        unwrap: function () {
            return this.parent().each(function () {
                v.nodeName(this, "body") || v(this).replaceWith(this.childNodes)
            }).end()
        },
        append: function () {
            return this.domManip(arguments, !0,
            function (e) {
                (this.nodeType === 1 || this.nodeType === 11) && this.appendChild(e)
            })
        },
        prepend: function () {
            return this.domManip(arguments, !0,
            function (e) {
                (this.nodeType === 1 || this.nodeType === 11) && this.insertBefore(e, this.firstChild)
            })
        },
        before: function () {
            if (!ut(this[0])) return this.domManip(arguments, !1,
            function (e) {
                this.parentNode.insertBefore(e, this)
            });
            if (arguments.length) {
                var e = v.clean(arguments);
                return this.pushStack(v.merge(e, this), "before", this.selector)
            }
        },
        after: function () {
            if (!ut(this[0])) return this.domManip(arguments, !1,
            function (e) {
                this.parentNode.insertBefore(e, this.nextSibling)
            });
            if (arguments.length) {
                var e = v.clean(arguments);
                return this.pushStack(v.merge(this, e), "after", this.selector)
            }
        },
        remove: function (e, t) {
            var n, r = 0;
            for (; (n = this[r]) != null; r++) if (!e || v.filter(e, [n]).length) !t && n.nodeType === 1 && (v.cleanData(n.getElementsByTagName("*")), v.cleanData([n])),
            n.parentNode && n.parentNode.removeChild(n);
            return this
        },
        empty: function () {
            var e, t = 0;
            for (; (e = this[t]) != null; t++) {
                e.nodeType === 1 && v.cleanData(e.getElementsByTagName("*"));
                while (e.firstChild) e.removeChild(e.firstChild)
            }
            return this
        },
        clone: function (e, t) {
            return e = e == null ? !1 : e,
            t = t == null ? e : t,
            this.map(function () {
                return v.clone(this, e, t)
            })
        },
        html: function (e) {
            return v.access(this,
            function (e) {
                var n = this[0] || {},
                r = 0,
                i = this.length;
                if (e === t) return n.nodeType === 1 ? n.innerHTML.replace(ht, "") : t;
                if (typeof e == "string" && !yt.test(e) && (v.support.htmlSerialize || !wt.test(e)) && (v.support.leadingWhitespace || !pt.test(e)) && !Nt[(vt.exec(e) || ["", ""])[1].toLowerCase()]) {
                    e = e.replace(dt, "<$1></$2>");
                    try {
                        for (; r < i; r++) n = this[r] || {},
                        n.nodeType === 1 && (v.cleanData(n.getElementsByTagName("*")), n.innerHTML = e);
                        n = 0
                    } catch (s) { }
                }
                n && this.empty().append(e)
            },
            null, e, arguments.length)
        },
        replaceWith: function (e) {
            return ut(this[0]) ? this.length ? this.pushStack(v(v.isFunction(e) ? e() : e), "replaceWith", e) : this : v.isFunction(e) ? this.each(function (t) {
                var n = v(this),
                r = n.html();
                n.replaceWith(e.call(this, t, r))
            }) : (typeof e != "string" && (e = v(e).detach()), this.each(function () {
                var t = this.nextSibling,
                n = this.parentNode;
                v(this).remove(),
                t ? v(t).before(e) : v(n).append(e)
            }))
        },
        detach: function (e) {
            return this.remove(e, !0)
        },
        domManip: function (e, n, r) {
            e = [].concat.apply([], e);
            var i, s, o, u, a = 0,
            f = e[0],
            l = [],
            c = this.length;
            if (!v.support.checkClone && c > 1 && typeof f == "string" && St.test(f)) return this.each(function () {
                v(this).domManip(e, n, r)
            });
            if (v.isFunction(f)) return this.each(function (i) {
                var s = v(this);
                e[0] = f.call(this, i, n ? s.html() : t),
                s.domManip(e, n, r)
            });
            if (this[0]) {
                i = v.buildFragment(e, this, l),
                o = i.fragment,
                s = o.firstChild,
                o.childNodes.length === 1 && (o = s);
                if (s) {
                    n = n && v.nodeName(s, "tr");
                    for (u = i.cacheable || c - 1; a < c; a++) r.call(n && v.nodeName(this[a], "table") ? Lt(this[a], "tbody") : this[a], a === u ? o : v.clone(o, !0, !0))
                }
                o = s = null,
                l.length && v.each(l,
                function (e, t) {
                    t.src ? v.ajax ? v.ajax({
                        url: t.src,
                        type: "GET",
                        dataType: "script",
                        async: !1,
                        global: !1,
                        "throws": !0
                    }) : v.error("no ajax") : v.globalEval((t.text || t.textContent || t.innerHTML || "").replace(Tt, "")),
                    t.parentNode && t.parentNode.removeChild(t)
                })
            }
            return this
        }
    }),
    v.buildFragment = function (e, n, r) {
        var s, o, u, a = e[0];
        return n = n || i,
        n = !n.nodeType && n[0] || n,
        n = n.ownerDocument || n,
        e.length === 1 && typeof a == "string" && a.length < 512 && n === i && a.charAt(0) === "<" && !bt.test(a) && (v.support.checkClone || !St.test(a)) && (v.support.html5Clone || !wt.test(a)) && (o = !0, s = v.fragments[a], u = s !== t),
        s || (s = n.createDocumentFragment(), v.clean(e, n, s, r), o && (v.fragments[a] = u && s)),
        {
            fragment: s,
            cacheable: o
        }
    },
    v.fragments = {},
    v.each({
        appendTo: "append",
        prependTo: "prepend",
        insertBefore: "before",
        insertAfter: "after",
        replaceAll: "replaceWith"
    },
    function (e, t) {
        v.fn[e] = function (n) {
            var r, i = 0,
            s = [],
            o = v(n),
            u = o.length,
            a = this.length === 1 && this[0].parentNode;
            if ((a == null || a && a.nodeType === 11 && a.childNodes.length === 1) && u === 1) return o[t](this[0]),
            this;
            for (; i < u; i++) r = (i > 0 ? this.clone(!0) : this).get(),
            v(o[i])[t](r),
            s = s.concat(r);
            return this.pushStack(s, e, o.selector)
        }
    }),
    v.extend({
        clone: function (e, t, n) {
            var r, i, s, o;
            v.support.html5Clone || v.isXMLDoc(e) || !wt.test("<" + e.nodeName + ">") ? o = e.cloneNode(!0) : (kt.innerHTML = e.outerHTML, kt.removeChild(o = kt.firstChild));
            if ((!v.support.noCloneEvent || !v.support.noCloneChecked) && (e.nodeType === 1 || e.nodeType === 11) && !v.isXMLDoc(e)) {
                Ot(e, o),
                r = Mt(e),
                i = Mt(o);
                for (s = 0; r[s]; ++s) i[s] && Ot(r[s], i[s])
            }
            if (t) {
                At(e, o);
                if (n) {
                    r = Mt(e),
                    i = Mt(o);
                    for (s = 0; r[s]; ++s) At(r[s], i[s])
                }
            }
            return r = i = null,
            o
        },
        clean: function (e, t, n, r) {
            var s, o, u, a, f, l, c, h, p, d, m, g, y = t === i && Ct,
            b = [];
            if (!t || typeof t.createDocumentFragment == "undefined") t = i;
            for (s = 0; (u = e[s]) != null; s++) {
                typeof u == "number" && (u += "");
                if (!u) continue;
                if (typeof u == "string") if (!gt.test(u)) u = t.createTextNode(u);
                else {
                    y = y || lt(t),
                    c = t.createElement("div"),
                    y.appendChild(c),
                    u = u.replace(dt, "<$1></$2>"),
                    a = (vt.exec(u) || ["", ""])[1].toLowerCase(),
                    f = Nt[a] || Nt._default,
                    l = f[0],
                    c.innerHTML = f[1] + u + f[2];
                    while (l--) c = c.lastChild;
                    if (!v.support.tbody) {
                        h = mt.test(u),
                        p = a === "table" && !h ? c.firstChild && c.firstChild.childNodes : f[1] === "<table>" && !h ? c.childNodes : [];
                        for (o = p.length - 1; o >= 0; --o) v.nodeName(p[o], "tbody") && !p[o].childNodes.length && p[o].parentNode.removeChild(p[o])
                    } !v.support.leadingWhitespace && pt.test(u) && c.insertBefore(t.createTextNode(pt.exec(u)[0]), c.firstChild),
                    u = c.childNodes,
                    c.parentNode.removeChild(c)
                }
                u.nodeType ? b.push(u) : v.merge(b, u)
            }
            c && (u = c = y = null);
            if (!v.support.appendChecked) for (s = 0; (u = b[s]) != null; s++) v.nodeName(u, "input") ? _t(u) : typeof u.getElementsByTagName != "undefined" && v.grep(u.getElementsByTagName("input"), _t);
            if (n) {
                m = function (e) {
                    if (!e.type || xt.test(e.type)) return r ? r.push(e.parentNode ? e.parentNode.removeChild(e) : e) : n.appendChild(e)
                };
                for (s = 0; (u = b[s]) != null; s++) if (!v.nodeName(u, "script") || !m(u)) n.appendChild(u),
                typeof u.getElementsByTagName != "undefined" && (g = v.grep(v.merge([], u.getElementsByTagName("script")), m), b.splice.apply(b, [s + 1, 0].concat(g)), s += g.length)
            }
            return b
        },
        cleanData: function (e, t) {
            var n, r, i, s, o = 0,
            u = v.expando,
            a = v.cache,
            f = v.support.deleteExpando,
            l = v.event.special;
            for (; (i = e[o]) != null; o++) if (t || v.acceptData(i)) {
                r = i[u],
                n = r && a[r];
                if (n) {
                    if (n.events) for (s in n.events) l[s] ? v.event.remove(i, s) : v.removeEvent(i, s, n.handle);
                    a[r] && (delete a[r], f ? delete i[u] : i.removeAttribute ? i.removeAttribute(u) : i[u] = null, v.deletedIds.push(r))
                }
            }
        }
    }),
    function () {
        var e, t;
        v.uaMatch = function (e) {
            e = e.toLowerCase();
            var t = /(chrome)[ \/]([\w.]+)/.exec(e) || /(webkit)[ \/]([\w.]+)/.exec(e) || /(opera)(?:.*version|)[ \/]([\w.]+)/.exec(e) || /(msie) ([\w.]+)/.exec(e) || e.indexOf("compatible") < 0 && /(mozilla)(?:.*? rv:([\w.]+)|)/.exec(e) || [];
            return {
                browser: t[1] || "",
                version: t[2] || "0"
            }
        },
        e = v.uaMatch(o.userAgent),
        t = {},
        e.browser && (t[e.browser] = !0, t.version = e.version),
        t.chrome ? t.webkit = !0 : t.webkit && (t.safari = !0),
        v.browser = t,
        v.sub = function () {
            function e(t, n) {
                return new e.fn.init(t, n)
            }
            v.extend(!0, e, this),
            e.superclass = this,
            e.fn = e.prototype = this(),
            e.fn.constructor = e,
            e.sub = this.sub,
            e.fn.init = function (r, i) {
                return i && i instanceof v && !(i instanceof e) && (i = e(i)),
                v.fn.init.call(this, r, i, t)
            },
            e.fn.init.prototype = e.fn;
            var t = e(i);
            return e
        }
    } ();
    var Dt, Pt, Ht, Bt = /alpha\([^)]*\)/i,
    jt = /opacity=([^)]*)/,
    Ft = /^(top|right|bottom|left)$/,
    It = /^(none|table(?!-c[ea]).+)/,
    qt = /^margin/,
    Rt = new RegExp("^(" + m + ")(.*)$", "i"),
    Ut = new RegExp("^(" + m + ")(?!px)[a-z%]+$", "i"),
    zt = new RegExp("^([-+])=(" + m + ")", "i"),
    Wt = {
        BODY: "block"
    },
    Xt = {
        position: "absolute",
        visibility: "hidden",
        display: "block"
    },
    Vt = {
        letterSpacing: 0,
        fontWeight: 400
    },
    $t = ["Top", "Right", "Bottom", "Left"],
    Jt = ["Webkit", "O", "Moz", "ms"],
    Kt = v.fn.toggle;
    v.fn.extend({
        css: function (e, n) {
            return v.access(this,
            function (e, n, r) {
                return r !== t ? v.style(e, n, r) : v.css(e, n)
            },
            e, n, arguments.length > 1)
        },
        show: function () {
            return Yt(this, !0)
        },
        hide: function () {
            return Yt(this)
        },
        toggle: function (e, t) {
            var n = typeof e == "boolean";
            return v.isFunction(e) && v.isFunction(t) ? Kt.apply(this, arguments) : this.each(function () {
                (n ? e : Gt(this)) ? v(this).show() : v(this).hide()
            })
        }
    }),
    v.extend({
        cssHooks: {
            opacity: {
                get: function (e, t) {
                    if (t) {
                        var n = Dt(e, "opacity");
                        return n === "" ? "1" : n
                    }
                }
            }
        },
        cssNumber: {
            fillOpacity: !0,
            fontWeight: !0,
            lineHeight: !0,
            opacity: !0,
            orphans: !0,
            widows: !0,
            zIndex: !0,
            zoom: !0
        },
        cssProps: {
            "float": v.support.cssFloat ? "cssFloat" : "styleFloat"
        },
        style: function (e, n, r, i) {
            if (!e || e.nodeType === 3 || e.nodeType === 8 || !e.style) return;
            var s, o, u, a = v.camelCase(n),
            f = e.style;
            n = v.cssProps[a] || (v.cssProps[a] = Qt(f, a)),
            u = v.cssHooks[n] || v.cssHooks[a];
            if (r === t) return u && "get" in u && (s = u.get(e, !1, i)) !== t ? s : f[n];
            o = typeof r,
            o === "string" && (s = zt.exec(r)) && (r = (s[1] + 1) * s[2] + parseFloat(v.css(e, n)), o = "number");
            if (r == null || o === "number" && isNaN(r)) return;
            o === "number" && !v.cssNumber[a] && (r += "px");
            if (!u || !("set" in u) || (r = u.set(e, r, i)) !== t) try {
                f[n] = r
            } catch (l) { }
        },
        css: function (e, n, r, i) {
            var s, o, u, a = v.camelCase(n);
            return n = v.cssProps[a] || (v.cssProps[a] = Qt(e.style, a)),
            u = v.cssHooks[n] || v.cssHooks[a],
            u && "get" in u && (s = u.get(e, !0, i)),
            s === t && (s = Dt(e, n)),
            s === "normal" && n in Vt && (s = Vt[n]),
            r || i !== t ? (o = parseFloat(s), r || v.isNumeric(o) ? o || 0 : s) : s
        },
        swap: function (e, t, n) {
            var r, i, s = {};
            for (i in t) s[i] = e.style[i],
            e.style[i] = t[i];
            r = n.call(e);
            for (i in t) e.style[i] = s[i];
            return r
        }
    }),
    e.getComputedStyle ? Dt = function (t, n) {
        var r, i, s, o, u = e.getComputedStyle(t, null),
        a = t.style;
        return u && (r = u.getPropertyValue(n) || u[n], r === "" && !v.contains(t.ownerDocument, t) && (r = v.style(t, n)), Ut.test(r) && qt.test(n) && (i = a.width, s = a.minWidth, o = a.maxWidth, a.minWidth = a.maxWidth = a.width = r, r = u.width, a.width = i, a.minWidth = s, a.maxWidth = o)),
        r
    } : i.documentElement.currentStyle && (Dt = function (e, t) {
        var n, r, i = e.currentStyle && e.currentStyle[t],
        s = e.style;
        return i == null && s && s[t] && (i = s[t]),
        Ut.test(i) && !Ft.test(t) && (n = s.left, r = e.runtimeStyle && e.runtimeStyle.left, r && (e.runtimeStyle.left = e.currentStyle.left), s.left = t === "fontSize" ? "1em" : i, i = s.pixelLeft + "px", s.left = n, r && (e.runtimeStyle.left = r)),
        i === "" ? "auto" : i
    }),
    v.each(["height", "width"],
    function (e, t) {
        v.cssHooks[t] = {
            get: function (e, n, r) {
                if (n) return e.offsetWidth === 0 && It.test(Dt(e, "display")) ? v.swap(e, Xt,
                function () {
                    return tn(e, t, r)
                }) : tn(e, t, r)
            },
            set: function (e, n, r) {
                return Zt(e, n, r ? en(e, t, r, v.support.boxSizing && v.css(e, "boxSizing") === "border-box") : 0)
            }
        }
    }),
    v.support.opacity || (v.cssHooks.opacity = {
        get: function (e, t) {
            return jt.test((t && e.currentStyle ? e.currentStyle.filter : e.style.filter) || "") ? .01 * parseFloat(RegExp.$1) + "" : t ? "1" : ""
        },
        set: function (e, t) {
            var n = e.style,
            r = e.currentStyle,
            i = v.isNumeric(t) ? "alpha(opacity=" + t * 100 + ")" : "",
            s = r && r.filter || n.filter || "";
            n.zoom = 1;
            if (t >= 1 && v.trim(s.replace(Bt, "")) === "" && n.removeAttribute) {
                n.removeAttribute("filter");
                if (r && !r.filter) return
            }
            n.filter = Bt.test(s) ? s.replace(Bt, i) : s + " " + i
        }
    }),
    v(function () {
        v.support.reliableMarginRight || (v.cssHooks.marginRight = {
            get: function (e, t) {
                return v.swap(e, {
                    display: "inline-block"
                },
                function () {
                    if (t) return Dt(e, "marginRight")
                })
            }
        }),
        !v.support.pixelPosition && v.fn.position && v.each(["top", "left"],
        function (e, t) {
            v.cssHooks[t] = {
                get: function (e, n) {
                    if (n) {
                        var r = Dt(e, t);
                        return Ut.test(r) ? v(e).position()[t] + "px" : r
                    }
                }
            }
        })
    }),
    v.expr && v.expr.filters && (v.expr.filters.hidden = function (e) {
        return e.offsetWidth === 0 && e.offsetHeight === 0 || !v.support.reliableHiddenOffsets && (e.style && e.style.display || Dt(e, "display")) === "none"
    },
    v.expr.filters.visible = function (e) {
        return !v.expr.filters.hidden(e)
    }),
    v.each({
        margin: "",
        padding: "",
        border: "Width"
    },
    function (e, t) {
        v.cssHooks[e + t] = {
            expand: function (n) {
                var r, i = typeof n == "string" ? n.split(" ") : [n],
                s = {};
                for (r = 0; r < 4; r++) s[e + $t[r] + t] = i[r] || i[r - 2] || i[0];
                return s
            }
        },
        qt.test(e) || (v.cssHooks[e + t].set = Zt)
    });
    var rn = /%20/g,
    sn = /\[\]$/,
    on = /\r?\n/g,
    un = /^(?:color|date|datetime|datetime-local|email|hidden|month|number|password|range|search|tel|text|time|url|week)$/i,
    an = /^(?:select|textarea)/i;
    v.fn.extend({
        serialize: function () {
            return v.param(this.serializeArray())
        },
        serializeArray: function () {
            return this.map(function () {
                return this.elements ? v.makeArray(this.elements) : this
            }).filter(function () {
                return this.name && !this.disabled && (this.checked || an.test(this.nodeName) || un.test(this.type))
            }).map(function (e, t) {
                var n = v(this).val();
                return n == null ? null : v.isArray(n) ? v.map(n,
                function (e, n) {
                    return {
                        name: t.name,
                        value: e.replace(on, "\r\n")
                    }
                }) : {
                    name: t.name,
                    value: n.replace(on, "\r\n")
                }
            }).get()
        }
    }),
    v.param = function (e, n) {
        var r, i = [],
        s = function (e, t) {
            t = v.isFunction(t) ? t() : t == null ? "" : t,
            i[i.length] = encodeURIComponent(e) + "=" + encodeURIComponent(t)
        };
        n === t && (n = v.ajaxSettings && v.ajaxSettings.traditional);
        if (v.isArray(e) || e.jquery && !v.isPlainObject(e)) v.each(e,
        function () {
            s(this.name, this.value)
        });
        else for (r in e) fn(r, e[r], n, s);
        return i.join("&").replace(rn, "+")
    };
    var ln, cn, hn = /#.*$/,
    pn = /^(.*?):[ \t]*([^\r\n]*)\r?$/mg,
    dn = /^(?:about|app|app\-storage|.+\-extension|file|res|widget):$/,
    vn = /^(?:GET|HEAD)$/,
    mn = /^\/\//,
    gn = /\?/,
    yn = /<script\b[^<]*(?:(?!<\/script>)<[^<]*)*<\/script>/gi,
    bn = /([?&])_=[^&]*/,
    wn = /^([\w\+\.\-]+:)(?:\/\/([^\/?#:]*)(?::(\d+)|)|)/,
    En = v.fn.load,
    Sn = {},
    xn = {},
    Tn = ["*/"] + ["*"];
    try {
        cn = s.href
    } catch (Nn) {
        cn = i.createElement("a"),
        cn.href = "",
        cn = cn.href
    }
    ln = wn.exec(cn.toLowerCase()) || [],
    v.fn.load = function (e, n, r) {
        if (typeof e != "string" && En) return En.apply(this, arguments);
        if (!this.length) return this;
        var i, s, o, u = this,
        a = e.indexOf(" ");
        return a >= 0 && (i = e.slice(a, e.length), e = e.slice(0, a)),
        v.isFunction(n) ? (r = n, n = t) : n && typeof n == "object" && (s = "POST"),
        v.ajax({
            url: e,
            type: s,
            dataType: "html",
            data: n,
            complete: function (e, t) {
                r && u.each(r, o || [e.responseText, t, e])
            }
        }).done(function (e) {
            o = arguments,
            u.html(i ? v("<div>").append(e.replace(yn, "")).find(i) : e)
        }),
        this
    },
    v.each("ajaxStart ajaxStop ajaxComplete ajaxError ajaxSuccess ajaxSend".split(" "),
    function (e, t) {
        v.fn[t] = function (e) {
            return this.on(t, e)
        }
    }),
    v.each(["get", "post"],
    function (e, n) {
        v[n] = function (e, r, i, s) {
            return v.isFunction(r) && (s = s || i, i = r, r = t),
            v.ajax({
                type: n,
                url: e,
                data: r,
                success: i,
                dataType: s
            })
        }
    }),
    v.extend({
        getScript: function (e, n) {
            return v.get(e, t, n, "script")
        },
        getJSON: function (e, t, n) {
            return v.get(e, t, n, "json")
        },
        ajaxSetup: function (e, t) {
            return t ? Ln(e, v.ajaxSettings) : (t = e, e = v.ajaxSettings),
            Ln(e, t),
            e
        },
        ajaxSettings: {
            url: cn,
            isLocal: dn.test(ln[1]),
            global: !0,
            type: "GET",
            contentType: "application/x-www-form-urlencoded; charset=UTF-8",
            processData: !0,
            async: !0,
            accepts: {
                xml: "application/xml, text/xml",
                html: "text/html",
                text: "text/plain",
                json: "application/json, text/javascript",
                "*": Tn
            },
            contents: {
                xml: /xml/,
                html: /html/,
                json: /json/
            },
            responseFields: {
                xml: "responseXML",
                text: "responseText"
            },
            converters: {
                "* text": e.String,
                "text html": !0,
                "text json": v.parseJSON,
                "text xml": v.parseXML
            },
            flatOptions: {
                context: !0,
                url: !0
            }
        },
        ajaxPrefilter: Cn(Sn),
        ajaxTransport: Cn(xn),
        ajax: function (e, n) {
            function T(e, n, s, a) {
                var l, y, b, w, S, T = n;
                if (E === 2) return;
                E = 2,
                u && clearTimeout(u),
                o = t,
                i = a || "",
                x.readyState = e > 0 ? 4 : 0,
                s && (w = An(c, x, s));
                if (e >= 200 && e < 300 || e === 304) c.ifModified && (S = x.getResponseHeader("Last-Modified"), S && (v.lastModified[r] = S), S = x.getResponseHeader("Etag"), S && (v.etag[r] = S)),
                e === 304 ? (T = "notmodified", l = !0) : (l = On(c, w), T = l.state, y = l.data, b = l.error, l = !b);
                else {
                    b = T;
                    if (!T || e) T = "error",
                    e < 0 && (e = 0)
                }
                x.status = e,
                x.statusText = (n || T) + "",
                l ? d.resolveWith(h, [y, T, x]) : d.rejectWith(h, [x, T, b]),
                x.statusCode(g),
                g = t,
                f && p.trigger("ajax" + (l ? "Success" : "Error"), [x, c, l ? y : b]),
                m.fireWith(h, [x, T]),
                f && (p.trigger("ajaxComplete", [x, c]), --v.active || v.event.trigger("ajaxStop"))
            }
            typeof e == "object" && (n = e, e = t),
            n = n || {};
            var r, i, s, o, u, a, f, l, c = v.ajaxSetup({},
            n),
            h = c.context || c,
            p = h !== c && (h.nodeType || h instanceof v) ? v(h) : v.event,
            d = v.Deferred(),
            m = v.Callbacks("once memory"),
            g = c.statusCode || {},
            b = {},
            w = {},
            E = 0,
            S = "canceled",
            x = {
                readyState: 0,
                setRequestHeader: function (e, t) {
                    if (!E) {
                        var n = e.toLowerCase();
                        e = w[n] = w[n] || e,
                        b[e] = t
                    }
                    return this
                },
                getAllResponseHeaders: function () {
                    return E === 2 ? i : null
                },
                getResponseHeader: function (e) {
                    var n;
                    if (E === 2) {
                        if (!s) {
                            s = {};
                            while (n = pn.exec(i)) s[n[1].toLowerCase()] = n[2]
                        }
                        n = s[e.toLowerCase()]
                    }
                    return n === t ? null : n
                },
                overrideMimeType: function (e) {
                    return E || (c.mimeType = e),
                    this
                },
                abort: function (e) {
                    return e = e || S,
                    o && o.abort(e),
                    T(0, e),
                    this
                }
            };
            d.promise(x),
            x.success = x.done,
            x.error = x.fail,
            x.complete = m.add,
            x.statusCode = function (e) {
                if (e) {
                    var t;
                    if (E < 2) for (t in e) g[t] = [g[t], e[t]];
                    else t = e[x.status],
                    x.always(t)
                }
                return this
            },
            c.url = ((e || c.url) + "").replace(hn, "").replace(mn, ln[1] + "//"),
            c.dataTypes = v.trim(c.dataType || "*").toLowerCase().split(y),
            c.crossDomain == null && (a = wn.exec(c.url.toLowerCase()), c.crossDomain = !(!a || a[1] === ln[1] && a[2] === ln[2] && (a[3] || (a[1] === "http:" ? 80 : 443)) == (ln[3] || (ln[1] === "http:" ? 80 : 443)))),
            c.data && c.processData && typeof c.data != "string" && (c.data = v.param(c.data, c.traditional)),
            kn(Sn, c, n, x);
            if (E === 2) return x;
            f = c.global,
            c.type = c.type.toUpperCase(),
            c.hasContent = !vn.test(c.type),
            f && v.active++ === 0 && v.event.trigger("ajaxStart");
            if (!c.hasContent) {
                c.data && (c.url += (gn.test(c.url) ? "&" : "?") + c.data, delete c.data),
                r = c.url;
                if (c.cache === !1) {
                    var N = v.now(),
                    C = c.url.replace(bn, "$1_=" + N);
                    c.url = C + (C === c.url ? (gn.test(c.url) ? "&" : "?") + "_=" + N : "")
                }
            } (c.data && c.hasContent && c.contentType !== !1 || n.contentType) && x.setRequestHeader("Content-Type", c.contentType),
            c.ifModified && (r = r || c.url, v.lastModified[r] && x.setRequestHeader("If-Modified-Since", v.lastModified[r]), v.etag[r] && x.setRequestHeader("If-None-Match", v.etag[r])),
            x.setRequestHeader("Accept", c.dataTypes[0] && c.accepts[c.dataTypes[0]] ? c.accepts[c.dataTypes[0]] + (c.dataTypes[0] !== "*" ? ", " + Tn + "; q=0.01" : "") : c.accepts["*"]);
            for (l in c.headers) x.setRequestHeader(l, c.headers[l]);
            if (!c.beforeSend || c.beforeSend.call(h, x, c) !== !1 && E !== 2) {
                S = "abort";
                for (l in {
                    success: 1,
                    error: 1,
                    complete: 1
                }) x[l](c[l]);
                o = kn(xn, c, n, x);
                if (!o) T(-1, "No Transport");
                else {
                    x.readyState = 1,
                    f && p.trigger("ajaxSend", [x, c]),
                    c.async && c.timeout > 0 && (u = setTimeout(function () {
                        x.abort("timeout")
                    },
                    c.timeout));
                    try {
                        E = 1,
                        o.send(b, T)
                    } catch (k) {
                        if (!(E < 2)) throw k;
                        T(-1, k)
                    }
                }
                return x
            }
            return x.abort()
        },
        active: 0,
        lastModified: {},
        etag: {}
    });
    var Mn = [],
    _n = /\?/,
    Dn = /(=)\?(?=&|$)|\?\?/,
    Pn = v.now();
    v.ajaxSetup({
        jsonp: "callback",
        jsonpCallback: function () {
            var e = Mn.pop() || v.expando + "_" + Pn++;
            return this[e] = !0,
            e
        }
    }),
    v.ajaxPrefilter("json jsonp",
    function (n, r, i) {
        var s, o, u, a = n.data,
        f = n.url,
        l = n.jsonp !== !1,
        c = l && Dn.test(f),
        h = l && !c && typeof a == "string" && !(n.contentType || "").indexOf("application/x-www-form-urlencoded") && Dn.test(a);
        if (n.dataTypes[0] === "jsonp" || c || h) return s = n.jsonpCallback = v.isFunction(n.jsonpCallback) ? n.jsonpCallback() : n.jsonpCallback,
        o = e[s],
        c ? n.url = f.replace(Dn, "$1" + s) : h ? n.data = a.replace(Dn, "$1" + s) : l && (n.url += (_n.test(f) ? "&" : "?") + n.jsonp + "=" + s),
        n.converters["script json"] = function () {
            return u || v.error(s + " was not called"),
            u[0]
        },
        n.dataTypes[0] = "json",
        e[s] = function () {
            u = arguments
        },
        i.always(function () {
            e[s] = o,
            n[s] && (n.jsonpCallback = r.jsonpCallback, Mn.push(s)),
            u && v.isFunction(o) && o(u[0]),
            u = o = t
        }),
        "script"
    }),
    v.ajaxSetup({
        accepts: {
            script: "text/javascript, application/javascript, application/ecmascript, application/x-ecmascript"
        },
        contents: {
            script: /javascript|ecmascript/
        },
        converters: {
            "text script": function (e) {
                return v.globalEval(e),
                e
            }
        }
    }),
    v.ajaxPrefilter("script",
    function (e) {
        e.cache === t && (e.cache = !1),
        e.crossDomain && (e.type = "GET", e.global = !1)
    }),
    v.ajaxTransport("script",
    function (e) {
        if (e.crossDomain) {
            var n, r = i.head || i.getElementsByTagName("head")[0] || i.documentElement;
            return {
                send: function (s, o) {
                    n = i.createElement("script"),
                    n.async = "async",
                    e.scriptCharset && (n.charset = e.scriptCharset),
                    n.src = e.url,
                    n.onload = n.onreadystatechange = function (e, i) {
                        if (i || !n.readyState || /loaded|complete/.test(n.readyState)) n.onload = n.onreadystatechange = null,
                        r && n.parentNode && r.removeChild(n),
                        n = t,
                        i || o(200, "success")
                    },
                    r.insertBefore(n, r.firstChild)
                },
                abort: function () {
                    n && n.onload(0, 1)
                }
            }
        }
    });
    var Hn, Bn = e.ActiveXObject ?
    function () {
        for (var e in Hn) Hn[e](0, 1)
    } : !1,
    jn = 0;
    v.ajaxSettings.xhr = e.ActiveXObject ?
    function () {
        return !this.isLocal && Fn() || In()
    } : Fn,
    function (e) {
        v.extend(v.support, {
            ajax: !!e,
            cors: !!e && "withCredentials" in e
        })
    } (v.ajaxSettings.xhr()),
    v.support.ajax && v.ajaxTransport(function (n) {
        if (!n.crossDomain || v.support.cors) {
            var r;
            return {
                send: function (i, s) {
                    var o, u, a = n.xhr();
                    n.username ? a.open(n.type, n.url, n.async, n.username, n.password) : a.open(n.type, n.url, n.async);
                    if (n.xhrFields) for (u in n.xhrFields) a[u] = n.xhrFields[u];
                    n.mimeType && a.overrideMimeType && a.overrideMimeType(n.mimeType),
                    !n.crossDomain && !i["X-Requested-With"] && (i["X-Requested-With"] = "XMLHttpRequest");
                    try {
                        for (u in i) a.setRequestHeader(u, i[u])
                    } catch (f) { }
                    a.send(n.hasContent && n.data || null),
                    r = function (e, i) {
                        var u, f, l, c, h;
                        try {
                            if (r && (i || a.readyState === 4)) {
                                r = t,
                                o && (a.onreadystatechange = v.noop, Bn && delete Hn[o]);
                                if (i) a.readyState !== 4 && a.abort();
                                else {
                                    u = a.status,
                                    l = a.getAllResponseHeaders(),
                                    c = {},
                                    h = a.responseXML,
                                    h && h.documentElement && (c.xml = h);
                                    try {
                                        c.text = a.responseText
                                    } catch (p) { }
                                    try {
                                        f = a.statusText
                                    } catch (p) {
                                        f = ""
                                    } !u && n.isLocal && !n.crossDomain ? u = c.text ? 200 : 404 : u === 1223 && (u = 204)
                                }
                            }
                        } catch (d) {
                            i || s(-1, d)
                        }
                        c && s(u, f, c, l)
                    },
                    n.async ? a.readyState === 4 ? setTimeout(r, 0) : (o = ++jn, Bn && (Hn || (Hn = {},
                    v(e).unload(Bn)), Hn[o] = r), a.onreadystatechange = r) : r()
                },
                abort: function () {
                    r && r(0, 1)
                }
            }
        }
    });
    var qn, Rn, Un = /^(?:toggle|show|hide)$/,
    zn = new RegExp("^(?:([-+])=|)(" + m + ")([a-z%]*)$", "i"),
    Wn = /queueHooks$/,
    Xn = [Gn],
    Vn = {
        "*": [function (e, t) {
            var n, r, i = this.createTween(e, t),
            s = zn.exec(t),
            o = i.cur(),
            u = +o || 0,
            a = 1,
            f = 20;
            if (s) {
                n = +s[2],
                r = s[3] || (v.cssNumber[e] ? "" : "px");
                if (r !== "px" && u) {
                    u = v.css(i.elem, e, !0) || n || 1;
                    do a = a || ".5",
                    u /= a,
                    v.style(i.elem, e, u + r);
                    while (a !== (a = i.cur() / o) && a !== 1 && --f)
                }
                i.unit = r,
                i.start = u,
                i.end = s[1] ? u + (s[1] + 1) * n : n
            }
            return i
        } ]
    };
    v.Animation = v.extend(Kn, {
        tweener: function (e, t) {
            v.isFunction(e) ? (t = e, e = ["*"]) : e = e.split(" ");
            var n, r = 0,
            i = e.length;
            for (; r < i; r++) n = e[r],
            Vn[n] = Vn[n] || [],
            Vn[n].unshift(t)
        },
        prefilter: function (e, t) {
            t ? Xn.unshift(e) : Xn.push(e)
        }
    }),
    v.Tween = Yn,
    Yn.prototype = {
        constructor: Yn,
        init: function (e, t, n, r, i, s) {
            this.elem = e,
            this.prop = n,
            this.easing = i || "swing",
            this.options = t,
            this.start = this.now = this.cur(),
            this.end = r,
            this.unit = s || (v.cssNumber[n] ? "" : "px")
        },
        cur: function () {
            var e = Yn.propHooks[this.prop];
            return e && e.get ? e.get(this) : Yn.propHooks._default.get(this)
        },
        run: function (e) {
            var t, n = Yn.propHooks[this.prop];
            return this.options.duration ? this.pos = t = v.easing[this.easing](e, this.options.duration * e, 0, 1, this.options.duration) : this.pos = t = e,
            this.now = (this.end - this.start) * t + this.start,
            this.options.step && this.options.step.call(this.elem, this.now, this),
            n && n.set ? n.set(this) : Yn.propHooks._default.set(this),
            this
        }
    },
    Yn.prototype.init.prototype = Yn.prototype,
    Yn.propHooks = {
        _default: {
            get: function (e) {
                var t;
                return e.elem[e.prop] == null || !!e.elem.style && e.elem.style[e.prop] != null ? (t = v.css(e.elem, e.prop, !1, ""), !t || t === "auto" ? 0 : t) : e.elem[e.prop]
            },
            set: function (e) {
                v.fx.step[e.prop] ? v.fx.step[e.prop](e) : e.elem.style && (e.elem.style[v.cssProps[e.prop]] != null || v.cssHooks[e.prop]) ? v.style(e.elem, e.prop, e.now + e.unit) : e.elem[e.prop] = e.now
            }
        }
    },
    Yn.propHooks.scrollTop = Yn.propHooks.scrollLeft = {
        set: function (e) {
            e.elem.nodeType && e.elem.parentNode && (e.elem[e.prop] = e.now)
        }
    },
    v.each(["toggle", "show", "hide"],
    function (e, t) {
        var n = v.fn[t];
        v.fn[t] = function (r, i, s) {
            return r == null || typeof r == "boolean" || !e && v.isFunction(r) && v.isFunction(i) ? n.apply(this, arguments) : this.animate(Zn(t, !0), r, i, s)
        }
    }),
    v.fn.extend({
        fadeTo: function (e, t, n, r) {
            return this.filter(Gt).css("opacity", 0).show().end().animate({
                opacity: t
            },
            e, n, r)
        },
        animate: function (e, t, n, r) {
            var i = v.isEmptyObject(e),
            s = v.speed(t, n, r),
            o = function () {
                var t = Kn(this, v.extend({},
                e), s);
                i && t.stop(!0)
            };
            return i || s.queue === !1 ? this.each(o) : this.queue(s.queue, o)
        },
        stop: function (e, n, r) {
            var i = function (e) {
                var t = e.stop;
                delete e.stop,
                t(r)
            };
            return typeof e != "string" && (r = n, n = e, e = t),
            n && e !== !1 && this.queue(e || "fx", []),
            this.each(function () {
                var t = !0,
                n = e != null && e + "queueHooks",
                s = v.timers,
                o = v._data(this);
                if (n) o[n] && o[n].stop && i(o[n]);
                else for (n in o) o[n] && o[n].stop && Wn.test(n) && i(o[n]);
                for (n = s.length; n--; ) s[n].elem === this && (e == null || s[n].queue === e) && (s[n].anim.stop(r), t = !1, s.splice(n, 1)); (t || !r) && v.dequeue(this, e)
            })
        }
    }),
    v.each({
        slideDown: Zn("show"),
        slideUp: Zn("hide"),
        slideToggle: Zn("toggle"),
        fadeIn: {
            opacity: "show"
        },
        fadeOut: {
            opacity: "hide"
        },
        fadeToggle: {
            opacity: "toggle"
        }
    },
    function (e, t) {
        v.fn[e] = function (e, n, r) {
            return this.animate(t, e, n, r)
        }
    }),
    v.speed = function (e, t, n) {
        var r = e && typeof e == "object" ? v.extend({},
        e) : {
            complete: n || !n && t || v.isFunction(e) && e,
            duration: e,
            easing: n && t || t && !v.isFunction(t) && t
        };
        r.duration = v.fx.off ? 0 : typeof r.duration == "number" ? r.duration : r.duration in v.fx.speeds ? v.fx.speeds[r.duration] : v.fx.speeds._default;
        if (r.queue == null || r.queue === !0) r.queue = "fx";
        return r.old = r.complete,
        r.complete = function () {
            v.isFunction(r.old) && r.old.call(this),
            r.queue && v.dequeue(this, r.queue)
        },
        r
    },
    v.easing = {
        linear: function (e) {
            return e
        },
        swing: function (e) {
            return .5 - Math.cos(e * Math.PI) / 2
        }
    },
    v.timers = [],
    v.fx = Yn.prototype.init,
    v.fx.tick = function () {
        var e, n = v.timers,
        r = 0;
        qn = v.now();
        for (; r < n.length; r++) e = n[r],
        !e() && n[r] === e && n.splice(r--, 1);
        n.length || v.fx.stop(),
        qn = t
    },
    v.fx.timer = function (e) {
        e() && v.timers.push(e) && !Rn && (Rn = setInterval(v.fx.tick, v.fx.interval))
    },
    v.fx.interval = 13,
    v.fx.stop = function () {
        clearInterval(Rn),
        Rn = null
    },
    v.fx.speeds = {
        slow: 600,
        fast: 200,
        _default: 400
    },
    v.fx.step = {},
    v.expr && v.expr.filters && (v.expr.filters.animated = function (e) {
        return v.grep(v.timers,
        function (t) {
            return e === t.elem
        }).length
    });
    var er = /^(?:body|html)$/i;
    v.fn.offset = function (e) {
        if (arguments.length) return e === t ? this : this.each(function (t) {
            v.offset.setOffset(this, e, t)
        });
        var n, r, i, s, o, u, a, f = {
            top: 0,
            left: 0
        },
        l = this[0],
        c = l && l.ownerDocument;
        if (!c) return;
        return (r = c.body) === l ? v.offset.bodyOffset(l) : (n = c.documentElement, v.contains(n, l) ? (typeof l.getBoundingClientRect != "undefined" && (f = l.getBoundingClientRect()), i = tr(c), s = n.clientTop || r.clientTop || 0, o = n.clientLeft || r.clientLeft || 0, u = i.pageYOffset || n.scrollTop, a = i.pageXOffset || n.scrollLeft, {
            top: f.top + u - s,
            left: f.left + a - o
        }) : f)
    },
    v.offset = {
        bodyOffset: function (e) {
            var t = e.offsetTop,
            n = e.offsetLeft;
            return v.support.doesNotIncludeMarginInBodyOffset && (t += parseFloat(v.css(e, "marginTop")) || 0, n += parseFloat(v.css(e, "marginLeft")) || 0),
            {
                top: t,
                left: n
            }
        },
        setOffset: function (e, t, n) {
            var r = v.css(e, "position");
            r === "static" && (e.style.position = "relative");
            var i = v(e),
            s = i.offset(),
            o = v.css(e, "top"),
            u = v.css(e, "left"),
            a = (r === "absolute" || r === "fixed") && v.inArray("auto", [o, u]) > -1,
            f = {},
            l = {},
            c,
            h;
            a ? (l = i.position(), c = l.top, h = l.left) : (c = parseFloat(o) || 0, h = parseFloat(u) || 0),
            v.isFunction(t) && (t = t.call(e, n, s)),
            t.top != null && (f.top = t.top - s.top + c),
            t.left != null && (f.left = t.left - s.left + h),
            "using" in t ? t.using.call(e, f) : i.css(f)
        }
    },
    v.fn.extend({
        position: function () {
            if (!this[0]) return;
            var e = this[0],
            t = this.offsetParent(),
            n = this.offset(),
            r = er.test(t[0].nodeName) ? {
                top: 0,
                left: 0
            } : t.offset();
            return n.top -= parseFloat(v.css(e, "marginTop")) || 0,
            n.left -= parseFloat(v.css(e, "marginLeft")) || 0,
            r.top += parseFloat(v.css(t[0], "borderTopWidth")) || 0,
            r.left += parseFloat(v.css(t[0], "borderLeftWidth")) || 0,
            {
                top: n.top - r.top,
                left: n.left - r.left
            }
        },
        offsetParent: function () {
            return this.map(function () {
                var e = this.offsetParent || i.body;
                while (e && !er.test(e.nodeName) && v.css(e, "position") === "static") e = e.offsetParent;
                return e || i.body
            })
        }
    }),
    v.each({
        scrollLeft: "pageXOffset",
        scrollTop: "pageYOffset"
    },
    function (e, n) {
        var r = /Y/.test(n);
        v.fn[e] = function (i) {
            return v.access(this,
            function (e, i, s) {
                var o = tr(e);
                if (s === t) return o ? n in o ? o[n] : o.document.documentElement[i] : e[i];
                o ? o.scrollTo(r ? v(o).scrollLeft() : s, r ? s : v(o).scrollTop()) : e[i] = s
            },
            e, i, arguments.length, null)
        }
    }),
    v.each({
        Height: "height",
        Width: "width"
    },
    function (e, n) {
        v.each({
            padding: "inner" + e,
            content: n,
            "": "outer" + e
        },
        function (r, i) {
            v.fn[i] = function (i, s) {
                var o = arguments.length && (r || typeof i != "boolean"),
                u = r || (i === !0 || s === !0 ? "margin" : "border");
                return v.access(this,
                function (n, r, i) {
                    var s;
                    return v.isWindow(n) ? n.document.documentElement["client" + e] : n.nodeType === 9 ? (s = n.documentElement, Math.max(n.body["scroll" + e], s["scroll" + e], n.body["offset" + e], s["offset" + e], s["client" + e])) : i === t ? v.css(n, r, i, u) : v.style(n, r, i, u)
                },
                n, o ? i : t, o, null)
            }
        })
    }),
    e.jQuery = e.$ = v,
    typeof define == "function" && define.amd && define.amd.jQuery && define("jquery", [],
    function () {
        return v
    })
})(window);
