# Supplementary material
Source: MDPI journal article supplement (https://www.mdpi.com/2077-1312/10/8/1051)
Supplement: s1 [file s1 › OSNSystem/OSNSystem/OSNSystem/bin/Debug/langchn.ini]

[String]
OK=È·ÈÏ
Cancel=È¡Ïû

Add Device=Ìí¼ÓÉè±¸
Name=Ãû³Æ
Port=¶Ë¿Ú
UserName=ÓÃ»§Ãû
Password=ÃÜÂë

Version NetSDKDemo 3.0 =NetSDKDemo 3.0 °æ
Copyright 2006=°æÈ¨ËùÓÐ (C) 2006
About NetSDKDemo=¹ØÓÚ NetSDKDemo

Alarm IO=±¨¾¯IO¿ØÖÆ
Save=±£´æ
In=ÊäÈë
Out=Êä³ö

Client State=¿Í»§¶Ë×´Ì¬
Don't show again=²»ÔÙµ¯³ö

AlarmState=±¨¾¯×´Ì¬
Device State=Éè±¸×´Ì¬

PTZ Control Menu=ÔÆÌ¨²Ëµ¥²Ù×÷
Cursor Control=²Ù×÷¹â±ê
Up=ÉÏ
Down=ÏÂ
Left=×ó
Right=ÓÒ
Open Menu=´ò¿ª²Ëµ¥
Close Menu=¹Ø±Õ²Ëµ¥

PTZ Extended Control=À©Õ¹ÔÆÌ¨¿ØÖÆ
Preset Point:=Ô¤ÖÃµã:
SetPoint=ÉèÖÃ
Delete=É¾³ý
Delete All=É¾³ýËùÓÐ
Goto=×ªÖÁ
Cruise Group:=Ñ²º½×é
AddCrsPoint=Ìí¼ÓÑ²º½µã
DelCrsGroup=É¾³ýÑ²º½µã
Mode No:=Ñ²¼£±àºÅ£º
Begin Set Mode=¿ªÊ¼¼ÇÂ¼
End Set Mode=Í£Ö¹¼ÇÂ¼
Delete Mode=É¾³ýÑ²¼£
Run Mode=¿ªÊ¼Ñ²¼£
Stop Mode=Í£Ö¹Ñ²¼£
Line-scan:=ÏßÐÔÉ¨Ãè
SetLeft=ÉèÖÃ×ó±ß½ç
SetRight=ÉèÖÃÓÒ±ß½ç
Fast Postioning:=ÈýÎ¬¶¨Î»
ZOOM:=±ä±¶
Pan-rotate:=Ë®Æ½Ðý×ª
Lamp rain-brush=µÆ¹âÓêË¢
Activate=Æô¶¯
Deactivate=Í£Ö¹
AUX No:=¸¨Öú¹¦ÄÜ£º
Aux Open=¿ªÆô
Aux Close=¹Ø±Õ
Go=¶¨Î»
Get=»ñÈ¡
Add user failed = Ôö¼ÓÓÃ»§Ê§°Ü
Please select at least one right= ÇëÖÁÉÙÑ¡ÔñÒ»ÏîÈ¨ÏÞ
Net SDK Demo=ÍøÂçSDKÑÝÊ¾³ÌÐò
Screen=»­ÃæÇÐ»»
CloseScreen=¹Ø±Õ²¥·Å
Audio=ÒôÆµ
Capture=×¥Í¼
SaveRealData=±£´æÊý¾Ý
ShowKBPS=ÂëÁ÷ÏÔÊ¾
Talk=ÓïÒô¶Ô½²
QueryRecord=Â¼Ïñ²éÑ¯
CompelIFrame=Ç¿ÖÆI Ö¡
DeviceList=Éè±¸ÁÐ±í
AddDevice=Ìí¼ÓÉè±¸
DeleteDevice=É¾³ýÉè±¸
SysCfg_S=ÏµÍ³ÅäÖÃ<S>
SysCfg_X=ÏµÍ³ÅäÖÃ<X>
IOControl=IO¿ØÖÆ
UpdateDevice=Éè±¸Éý¼¶
OpenChannel=´ò¿ªÍ¨µÀ
OpenPreview=´ò¿ªÔ¤ÀÀ
ClientState=¿Í»§¶ËÐÅÏ¢
SerialCom=Í¸Ã÷´®¿Ú
RecordConfig=Â¼Ïñ¿ØÖÆ
DeviceState=Éè±¸×´Ì¬
PTZControl=ÔÆÌ¨¿ØÖÆ
LUp=×óÉÏ
RUp=ÓÒÉÏ
LDown=×óÏÂ
RDown=ÓÒÏÂ
ControlParam=¿ØÖÆ²ÎÊý
Zoom=¾µÍ·
Wide=Ëõ
Tele=Éì
Focus=µ÷½¹
Near=½ü
Far=Ô¶
IRIS=¹âÈ¦
Close=Ð¡
Open=´ó
PTZMenu=ÔÆÌ¨²Ëµ¥
ExCtrl=À©Õ¹¿ØÖÆ
ColorConfig=ÑÕÉ«µ÷Õû
Bright=ÁÁ¶È
Contrast=¶Ô±È¶È
Saturation=±¥ºÍ¶È
Hue=É«¶È
PlayingControl=²¥·Å¿ØÖÆ
Play=²¥·Å
Stop=Í£Ö¹
Fast=¼Ó¿ì
Slow=¼õÂý
SingleF=µ¥Ö¡
FControl=¿ØÖ¡
MonitorCallBackData=¼àÊÓ»Øµ÷Êý¾Ý
SaveRawData=±£´æÔ­Ê¼Êý¾Ý
SaveYuvData=±£´æyuvÊý¾Ý
SaveStdData=±£´æ±ê×¼Êý¾Ý
SavePcmData=±£´æpcmÒôÆµÊý¾Ý
ChName=Í¨µÀÃû³Æ
ChNum=Í¨µÀºÅ
Channel=Í¨µÀºÅ
None=²»Â¼Ïñ
Auto=×Ô¶¯
Manual=ÊÖ¶¯

DeviceName=Éè±¸Ãû
QueryType=²éÑ¯ÀàÐÍ
StartTime=¿ªÊ¼Ê±¼ä
EndTime=½áÊøÊ±¼ä
CardID=¿¨ºÅ
Query=²éÑ¯
ClearList=Çå¿ÕÁÐ±í
Download=ÏÂÔØ
Start=¿ªÊ¼
FileIndex:=ÎÄ¼þÐòºÅ
FileInfo=ÎÄ¼þÐÅÏ¢


InfoDisplay=ÏÔÊ¾ÐÅÏ¢
Monitor=¼à¿Ø
DeviceName  Channel    State   BitRate(kbps)  Total(kbps)=Éè±¸Ãû³Æ   Í¨µÀºÅ       ×´Ì¬    ÂëÁ÷(kbps) Éè±¸×ÜÂëÁ÷(kbps)
BitRateControl=ÂëÁ÷¿ØÖÆ
BitRate=ÏÞ¶¨ÂëÁ÷

ComSel=COMÑ¡Ôñ
BaundRate=²¨ÌØÂÊ
DataBit=Êý¾ÝÎ»
StopBit=Í£Ö¹Î»
ParityBit=Ð£Ñé
OpenCom=´ò¿ª´®¿Ú
Send And Receive=·¢ËÍÇø
ClearReceive=Çå¿Õ½ÓÊÕ
ClearSend=Çå¿Õ·¢ËÍ
Send=·¢ËÍ
Hex Format=Ê®Áù½øÖÆ¸ñÊ½
Data format error.=·¢ËÍÊý¾Ý¸ñÊ½ÓÐÎó.

CycleMonitor=ÂÖÑ²¼àÊÓ
Cycle Monitor=ÂÖÑ²¼àÊÓ
Channel:=Í¨µÀºÅ:
Cycle Interval (5-36000seconds)=ÂÖÑ²Ê±¼ä¼ä¸ô ( 5-36000Ãë )

SDKVersion=SDK°æ±¾

PB_ByTime=°´Ê±¼ä»Ø·Å
DL_ByTime=°´Ê±¼äÏÂÔØ
Play Back By Time=°´Ê±¼ä»Ø·Å
RebootDevice=ÖØÆôDVR

Net Upgrade=ÍøÂçÉý¼¶
UpdateSystem=ÍøÂçÉý¼¶
OpenFile=´ò¿ªÎÄ¼þ
Upgrade progress=Éý¼¶½ø¶È
SendBios=Éý¼¶BIOS
SendWeb=Éý¼¶WEB
SendBoot=Éý¼¶BOOT
BiosAndBoot=Éý¼¶BIOS/BOOT

DDNS=DDNS²éÑ¯IP

Runtime Message=ÔËÐÐÊ±ÐÅÏ¢
Flux:=ÂëÁ÷£º
LastErr:=´íÎó£º

Full Screen=È«ÆÁ»­Ãæ
CloseAll=¹Ø±Õ(È«)

DevList=Éè±¸±í
Color=ÑÕÉ«
Data=»Øµ÷
PBCtrl=»Ø·Å
Normal=³£¹æ
Advance=¸ß¼¶
DevName=Éè±¸Ãû
Output:=½á¹û:

flux statisc=ÂëÁ÷Í³¼Æ

UserInfo=ÓÃ»§ÕÊºÅ
ShutDown=¹Ø±ÕDVR

WorkState=Éè±¸¹¤×÷×´Ì¬
AudioBroad=¶Ô½²¹ã²¥

Cruise=µã¼äÑ²º½
SetCrsPoint=Ìí¼ÓÑ²º½µã
DelCrsPoint=É¾³ýÑ²º½µã
LineScan=ÏßÐÔÉ¨Ãè
StartCruise=Ñ²º½¿ªÊ¼
StopCruise=Ñ²º½Í£Ö¹
Roll=Ë®Æ½Ðý×ª

UndoAll=»Ö¸´
Apply=±£´æ
Channel:=Í¨µÀ£º
Redundancy=ÈßÓà¿ª¹Ø
PreRecordLen:=Ô¤Â¼Ê±¼ä
Time Sectors:=Ê±¼ä¶Î£º

232 COM:=232´®¿Ú
Function:=¹¦ÄÜ£º
Data Bit:=Êý¾ÝÎ»£º
Stop Bit:=Í£Ö¹Î»£º
Baud Rate:=²¨ÌØÂÊ£º
Parity:=Ð£Ñé£º
485 Decoder:=½âÂëÆ÷:£º
Protocol:=Ð­Òé£º
Address:=µØÖ·£º
ChnName:=Í¨µÀÃû£º
Stream:=ÂëÁ÷£º
AVEnable:=Ê¹ÄÜ£º
Video=ÊÓÆµ
Audio=ÒôÆµ
BitRateCtrl:=ÂëÂÊ¿ØÖÆ£º
Frame:=Ö¡ÂÊ£º
EncodeType:=½âÂëÄ£Ê½£º
Resolution:=·Ö±æÂÊ£º
ImgQuality:=»­ÖÊ£º
AudioFormat:=ÒôÆµ±àÂë£º
AudioTrackNum:=ÉùµÀÊý£º
BitPerSmpl:=²ÉÑùÉî¶È£º
SmplPerSec:=²ÉÑùÂÊ£º
Brightness:=ÁÁ¶È£º
Contrast:=¶Ô±È¶È£º
Saturation:=±¥ºÍ¶È£º
Hue:=É«¶È£º
Gain:=ÔöÒæ£º
OSD Type:=OSDÀàÐÍ£º
Show=ÏÔÊ¾
RED=ºì
GRN=ÂÌ
BLU=À¶
TRANS=Í¸Ã÷
ForeGround:=Ç°¾°£º
BackGround:=±³¾°£º
LFT=×ó
TOP=ÉÏ
RGT=ÓÒ
BTM=ÏÂ
RECT=ÇøÓò
Blind Type:=ÕÚµ²ÀàÐÍ£º
Alarm In:=±¨¾¯ÊäÈë£º
Enable=Ê¹ÄÜ
Alarm Type:=±¨¾¯ÀàÐÍ£º
WEEK=ÐÇÆÚ£º
Option:=Ñ¡Ïî£º
UpLoadServer=ÉÏ´«·þÎñÆ÷
LocalTip=±¾µØÌáÊ¾
LocalTour=±¾µØÂÖÑ²
SendMail=·¢ËÍÓÊ¼þ
AlarmOutput:=±¨¾¯Êä³ö£º
Record:=Áª¶¯Â¼Ïñ£º
PTZ Action:=Áª¶¯ÔÆÌ¨£º

VideoChl:=Í¨µÀ£º
SenseLevel:=ÁéÃô¶È£º
StartTime=¿ªÊ¼Ê±¼ä
EndTime=½áÊøÊ±¼ä

System config=ÏµÍ³ÅäÖÃ
Motion detect=¶¯Ì¬¼ì²â
Set Area=¼ì²âÇøÓò

DevType:=Éè±¸ÀàÐÍ£º
SerialNo:=ÐòÁÐºÅ£º
VideoNum:=ÊÓÆµÊäÈëÊý£º
AudioNum:=ÒôÆµÊäÈëÊý£º
AlarmIn:=±¨¾¯ÊäÈëÊý£º
AlarmOut:=±¨¾¯Êä³öÊý£º
NetPortNum:=ÍøÂç¿ÚÊý£º
UsbNum:=USB¿ÚÊý£º
IdeNum:=IDE¿ÚÊý£º
232Com:=232´®¿ÚÊý£º
LPortNum:=²¢¿ÚÊý£º
TalkInNum:=¶Ô½²ÊäÈëÊý£º
TalkOutNum:=¶Ô½²Êä³öÊý£º
DecChanNum:=½âÂëÍ¨µÀÊý£º
IdeCtrlNum:=IDE¿ØÖÆÆ÷Êý£º
IdeCtrlTyp:=IDE¿ØÖÆÀàÐÍ£º
VgaPortNum:=VGA¿ÚÊý£º
DevNo:=Éè±¸ºÅ£º
DiskFull:=Ó²ÅÌÂú£º
RecordLen:=Â¼Ïñ´ò°ü³¤¶È£º
VideoFmt:=ÊÓÆµÖÆÊ½£º
DateFmt:=ÈÕÆÚ¸ñÊ½£º
DateSprtr:=ÈÕÆÚ·Ö¸î·û£º
TimeFmt:=Ê±¼ä¸ñÊ½£º
StartChan:=ÆðÊ¼Í¨µÀºÅ£º

DevName:=Éè±¸Ãû
Max TCP:=TCPÁ¬½ÓÊý£º
TCP Port:=TCP¶Ë¿Ú£º
UDP Port:=UDP¶Ë¿Ú£º
HTTP Port:=HTTP¶Ë¿Ú£º
HTTPS Port:=HTTPS¶Ë¿Ú£º
SSL Port:=SSL¶Ë¿Ú£º
EtherNet:=ÒÔÌ«Íø¿Ú£º
IP:=IP£º
IP Mask:=IPÑÚÂë£º
GateWay:=Íø¹Ø£º
InterFace:=½Ó¿ÚÀàÐÍ£º
MacAddr:=MacµØÖ·£º
RemoteHost:=Ô¶³ÌÖ÷»ú£º
Enable=Ê¹ÄÜ
Port:=¶Ë¿Ú£º
UserName:=ÓÃ»§Ãû£º
UserPsw:=ÃÜÂë£º

Des Addr:=Ä¿µÄµØÖ·£º
CC Addr:=³­ËÍµØÖ·£º
Bcc Addr:=°µ³­µØÖ·£º
Subject:=ÓÊ¼þ±êÌâ£º


Download By Time=°´Ê±¼äÏÂÔØ

single=µ¥»­Ãæ
split-4=ËÄ»­Ãæ
split-9=¾Å»­Ãæ
split-16=Ê®Áù»­Ãæ

MainStream=Ö÷ÂëÁ÷
Substream_1=´ÓÂëÁ÷_1
Substream_2=´ÓÂëÁ÷_2
Substream_3=´ÓÂëÁ÷_3

Never=´Ó²»
24 Hour=24Ð¡Ê±
48 Hour=48Ð¡Ê±
72 Hour=72Ð¡Ê±
96 Hour=96Ð¡Ê± 
1 Week=1ÐÇÆÚ
everyday=Ã¿Ìì
Monday=ÐÇÆÚÒ»
Tuesday=ÐÇÆÚ¶þ
Wednesday=ÐÇÆÚÈý
Thursday=ÐÇÆÚËÄ
Friday=ÐÇÆÚÎå
Saturday=ÐÇÆÚÁù
Sunday=ÐÇÆÚÈÕ

N_Close=³£±Õ
N_Open=³£¿ª

Stop=Í£Ö¹
OverWrite=¸²¸Ç
light control:=µÆ¹â:
controller:=ÓêË¢:
lightNo:=¸¨ÖúºÅ:

Trigger=´¥·¢

server version doesn't match !=°æ±¾²»·ûºÏ!
device's node add to list failed=Éè±¸Ìí¼Óµ½ÁÐ±íÊ§°Ü
alarm config save failed!=±¨¾¯ÅäÖÃ±£´æÊ§°Ü!
trigger failed!=´¥·¢Ê§°Ü!
Something is wrong!=´íÎó!
get auto maintenance info failed!=»ñÈ¡×Ô¶¯Î¬»¤ÐÅÏ¢Ê§°Ü!
set auto maintenance info failed!=ÉèÖÃ×Ô¶¯Î¬»¤ÐÅÏ¢Ê§°Ü!
channel config save failed!=Í¨µÀÅäÖÃ±£´æÊ§°Ü!
Full=Âú
Not=Î´Âú
channel %d=Í¨µÀ%d
COM %d=´®¿Ú%d
Decoder %d=½âÂëÆ÷%d
Ethernet %d=Íø¿¨%d
DDNS %d=¶¯Ì¬ÓòÃû·þÎñÆ÷%d
Get Dev Multi DDNS Info Fail!=»ñÈ¡¶àDDNSÐÅÏ¢Ê§°Ü!
error while getting split information=´íÎó£¬»ñÈ¡·Ö¸îÐÅÏ¢Ê§°Ü
chl %02d=Í¨µÀ%02d
check this out!=Ð£ÑéÊ§°Ü£¡
check that out!=Ð£ÑéÊ§°Ü£¡
plz check this out!=ÔÆÌ¨Ð£ÑéÊ§°Ü
failed=Ê§°Ü
query error=²éÑ¯Ê§°Ü
BitRate : =±ÈÌØÂÊ:
NetConn :=Á¬½ÓÊý:
query error=²éÑ¯Ê§°Ü
Disk %d=Ó²ÅÌ%d
Size: %d, Remain: %d=×ÜÈÝÁ¿£º%d,Ê£ÓàÈÝÁ¿:%d
Work status: Sleeping=¹¤×÷×´Ì¬£ºÐÝÃß
Work status: Working=¹¤×÷×´Ì¬£º¹¤×÷
Work status: Error=¹¤×÷×´Ì¬£º´íÎó
 Driver type: %d, Driver index: %d\n size: %d, Remain: %d, Record sections: %d\n\n Record section 1:\n %d-%02d-%02d %02d:%02d:%02d ~ %d-%02d-%02d %02d:%02d:%02d\n\n Record section 2:\n %d-%02d-%02d %02d:%02d:%02d ~ %d-%02d-%02d %02d:%02d:%02d\n\n= Çý¶¯Æ÷ÀàÐÍ: %d, Çý¶¯Æ÷Ë÷Òý: %d\n ÈÝÁ¿:%d, Ê£ÓàÈÝÁ¿%d, Â¼Ïñ¶Î: %d\n\n Â¼Ïñ¶Î 1:\n %d-%02d-%02d %02d:%02d:%02d ~ %d-%02d-%02d %02d:%02d:%02d\n\n Â¼Ïñ¶Î 2:\n %d-%02d-%02d %02d:%02d:%02d ~ %d-%02d-%02d %02d:%02d:%02d\n\n
 Is working: Yes=¹¤×÷ÖÐ:ÊÇ
 Is working: No=¹¤×÷ÖÐ:·ñ
channel: %d, driver no: %d, size: %d\r\nstart time: %d-%d-%d-%d-%d-%d\r\nend time: %d-%d-%d-%d-%d-%d=Í¨µÀ: %d, Çý¶¯Æ÷: %d, ÈÝÁ¿: %d\r\n¿ªÊ¼Ê±¼ä: %d-%d-%d-%d-%d-%d\r\n½áÊøÊ±¼ä: %d-%d-%d-%d-%d-%d
alarm infomation:\n=±¨¾¯ÐÅÏ¢:\n
! ALARM !=±¨¾¯
unexpected error!!=Òì³£´íÎó!!
error while getting split info=´íÎó£¬»ñÈ¡·Ö¸îÐÅÏ¢Ê§°Ü
error while setting split info=´íÎó£¬ÉèÖÃ·Ö¸îÐÅÏ¢Ê§°Ü
(on-line)=ÔÚÏß
(off-line)=ÀëÏß
channel %02d=Í¨µÀ%02d
unexpected error!!!!=Òì³£´íÎó!!!!
paused=ÔÝÍ£
we have a big error here!=ÖØ´ó´íÎó!
stop save file failed=Í£Ö¹±£´æÊ§°Ü
!error!=!´íÎó!
Stop talk error=Í£Ö¹¶Ô½²´íÎó
current num is %d \n=µ±Ç°ÊýÄ¿ÊÇ%d\n
!!error!!=!!´íÎó!!

Error: Cannot close current screen!=´íÎó:²»ÄÜ¹Ø±Õµ±Ç°»­Ãæ!
!!big error!!=!!ÖØ´ó´íÎó!!
fatal error!=ÖÂÃü´íÎó!
oops!=Î»ÖÃ´íÎó£¡
Send upgrade data error!=·¢ËÍÉý¼¶Êý¾ÝÊ§°Ü!
%s  channel%02d=%s Í¨µÀ%02d
not enough space in disk!=Ó²ÅÌ¿Õ¼ä²»×ã!
get download pos= %d, %d \n=»ñÈ¡ÏÂÔØÎ»ÖÃÊ§°Ü
232error=232´®¿Ú´íÎó
rs232 config save failed!=232´®¿ÚÅäÖÃ±£´æÊ§°Ü!
rs485 config save failed!=485´®¿ÚÅäÖÃ±£´æÊ§°Ü!
485 error=485´®¿Ú´íÎó
com=´®¿Ú
usercfg error=»ñÈ¡ÓÃ»§Êý¾ÝÊ§°Ü
failed to get user info=»ñÈ¡ÓÃ»§ÐÅÏ¢Ê§°Ü
Failed to operate user info=ÓÃ»§²Ù×÷Ê§°Ü
Illegal input=·Ç·¨ÊäÈë

Reboot?(y/n)=ÊÇ·ñÖØÆô?
System:= ÏµÍ³ - 
natural=Õý³£
CPU occupy too high=cpu¹ý¸ß
,Local show=,±¾µØÏÔÊ¾ - 
TV natural=TVÕý³£
TV abnormality=TV²»Õý³£
VGA natural= VGAÕý³£
VGA abnormality= VGA²»Õý³£
Disk num: %d=Ó²ÅÌÊýÁ¿: %d
Disk=Ó²ÅÌ
Size: %d, Remain: %d\n=×ÜÈÝÁ¿: %d, Ê£ÓàÈÝÁ¿: %d\n 
Work status: Sleeping\n=Ó²ÅÌ×´Ì¬: ÐÝÃß\n
Work status: Working\n=Ó²ÅÌ×´Ì¬: ¹¤×÷\n
Work status: Error\n=Ó²ÅÌ×´Ì¬: ¹ÊÕÏ\n
temporary information:=ÁÙÊ±ÐÅÏ¢£º
trigger network alarm=´¥·¢ÍøÂç±¨¾¯
auto reboot=×Ô¶¯ÖØÆô
auto delete file=×Ô¶¯É¾³ýÎÄ¼þ
Please use the Parameter Config Demo in Sort Application folder , this part of code is stopped maintenance=ÇëÊ¹ÓÃ·ÖÀàÓ¦ÓÃÎÄ¼þ¼ÐÀïµÄ²ÎÊýÅäÖÃDEMO£¬±¾²¿·Ö´úÂëÒÑ²»×÷Î¬»¤!
Please use the Talk Demo in Sort Application folder , this part of code is stopped maintenance=ÇëÊ¹ÓÃ·ÖÀàÓ¦ÓÃÎÄ¼þ¼ÐÀïµÄÓïÒô¶Ô½²DEMO£¬±¾²¿·Ö´úÂëÒÑ²»×÷Î¬»¤!
Prompt=ÌáÊ¾
upgrade time:%d-%d-%d,%d:%d:%d\n=ÉÏ´«Ê±¼ä£º%d-%d-%d£¬%d:%d:%d\n
information:\n=ÐÅÏ¢£º\n
Alarm end, alarm:  channel No.:%d\n=±¨¾¯ÏûÊ§£¡Íâ²¿±¨¾¯: Í¨µÀºÅ %d\n
Alarm start, alram: channel No.:%d\n=ÐÂ±¨¾¯£¡Íâ²¿±¨¾¯: Í¨µÀºÅ %d\n
Alarm end, motion alarm: channel No.:%d\n=±¨¾¯ÏûÊ§£¡¶¯Ì¬¼ì²â: Í¨µÀºÅ %d\n
Alarm start, motion alarm: channel No.:%d\n=ÐÂ±¨¾¯£¡¶¯Ì¬¼ì²â: Í¨µÀºÅ %d\n
Alarm end, video lost alarm: channel No.:%d\n=±¨¾¯ÏûÊ§£¡ÊÓÆµ¶ªÊ§: Í¨µÀºÅ %d\n 
Alarm start, video lost alarm: channel No.:%d\n=ÐÂ±¨¾¯£¡ÊÓÆµ¶ªÊ§: Í¨µÀºÅ %d\n
Alarm end, shelter alarm: channel No.:%d\n=±¨¾¯ÏûÊ§£¡ÊÓÆµÕÚµ²: Í¨µÀºÅ %d\n
Alarm start, shelter alarm: channel No.:%d\n=ÐÂ±¨¾¯£¡ÊÓÆµÕÚµ²: Í¨µÀºÅ %d\n
Alarm, Disk full\n=ÐÂ±¨¾¯£¡Ó²ÅÌÂú\n
Alarm end, Disk error alarm %d\n=±¨¾¯ÏûÊ§£¡»µÓ²ÅÌ %d\n
Alarm start, Disk error alarm %d\n=ÐÂ±¨¾¯£¡»µÓ²ÅÌ %d\n
Alarm end, sound detect alarm: channel No.:%d\n=±¨¾¯ÏûÊ§£¡ÒôÆµ¼ì²â: Í¨µÀºÅ %d\n 
Alarm start, sound detect alarm:channel No.:%d\n=ÐÂ±¨¾¯£¡ÒôÆµ¼ì²â: Í¨µÀºÅ %d\n
Connect failed!=ÍøÂçÁ¬½ÓÊ§°Ü!

Device status=Éè±¸×´Ì¬
Disk status=Ó²ÅÌ×´Ì¬


Password is error!=ÃÜÂë²»ÕýÈ·
This user doesn't exist!=ÕÊ»§²»´æÔÚ
Wait for login overtime!=µÈ´ýµÇÂ¼·µ»Ø³¬Ê±
User account has been logined! =ÕÊºÅÒÑµÇÂ¼
User account has been locked!=ÕÊºÅÒÑ±»Ëø¶¨
User account is in blacklist!=ÕÊºÅÒÑ±»ÁÐÎªºÚÃûµ¥
Resource shortage,System is busy!=×ÊÔ´²»×ã£¬ÏµÍ³Ã¦
Connect host computer failed!=Á¬½ÓÖ÷»úÊ§°Ü
Connect network failed!=ÍøÂçÁ¬½ÓÊ§°Ü
Listen for device error!=Éè±¸¼àÌý³ö´í
Device is offline!=Éè±¸¶ÏÏß
Set IO input config error!=ÉèÖÃIOÊäÈë²»Õý³£
Set IO output config error!=ÉèÖÃIOÊä³ö²»Õý³£
Channels for Input alarm is aboved maxnumber!=ÊäÈë±¨¾¯Í¨µÀ´óÓÚ×î´óÖµ
Get alram state failed!=»ñÈ¡±¨¾¯×´Ì¬´íÎó
Bad disk:=»µÓ²ÅÌ:
Alarm:=±¨¾¯:
Alarm decoder:=±¨¾¯½âÂëÆ÷
Recording:=Â¼Ïñ:
Motion:=¶¯Ì¬¼ì²â:
Video lost:=ÊÓÆµ¶ªÊ§:
State:=×´Ì¬:
Sound alarm£º=ÒôÆµ±¨¾¯£º
Shelter alarm£º=ÕÚµ²±¨¾¯£º
Disk full£º=Ó²ÅÌÂú£º
Shelter alarm:=ÕÚµ²±¨¾¯:
Recording state:=Â¼Ïñ×´Ì¬:
Device state:=Éè±¸×´Ì¬:
Normal=Õý³£     
CPU is busyness!=cpuÕ¼ÓÃ¹ý¸ß    
Hardware error!=Ó²¼þ´íÎó    
Unknown error!=Î´Öª´íÎó    
Device displays state!:=Éè±¸ÏÔÊ¾×´Ì¬:       
Abnormality=²»Õý³£
Record channel:=Â¼ÏñÍ¨µÀ        :         
signal lost channel:=ÐÅºÅ¶ªÊ§Í¨µÀ:         
hardware abnormality channel:=Ó²¼þÒì³£Í¨µÀ:         
Alarm for Input port:=ÊäÈë¶Ë¿Ú±¨¾¯:         
Alarm for Output port:  =Êä³ö¶Ë¿Ú±¨¾¯:       
Channel is closed!=Í¨µÀÃ»´ò¿ª     
Command PTZ fail!=ÔÆÌ¨²Ëµ¥¿ØÖÆ²Ù×÷Ê§°Ü     
Single screen=µ¥»­Ãæ     
Four screens!=ËÄ»­Ãæ     
Nine screens!=¾Å»­Ãæ     
Sixteen screens!=Ê®Áù»­Ãæ     
Please connect to device and checked item first!=ÇëÏÈÁ¬½ÓÉè±¸ºÍÔÚÉÏ±íÖÐÑ¡ÖÐ     
When screen is playing,please stop play frist!=µ±Ç°»­ÃæÕýÔÚ²¥·Å,ÇëÏÈ¹Ø±Õµ±Ç°²¥·Å¹¦ÄÜ     
open channel fail,because the channel is opened at other window!=´ò¿ªÍ¨µÀÊ§°Ü£¬¿ÉÄÜÍ¨µÀÒÑ¾­ÔÚ±ðµÄ´°¿ÚÖÐ´ò¿ªÁË    
disable preview multi-screen=ÎÞ¶à»­ÃæÔ¤ÀÀ     
Save data failed!=±£´æÊý¾ÝÊ§°Ü     
Start player failed!=´ò¿ª²¥·ÅÊ§°Ü     
PTZ command parameter is wrong or PTZ command is disabled!=ÔÆÌ¨¿ØÖÆ²ÎÊý³ö´í»òÃüÁî²»ÊµÏÖ     
Current screen is closed!=µ±Ç°»­ÃæÃ»´ò¿ª     
Command PTZ failed!=ÔÆÌ¨¿ØÖÆ²Ù×÷Ê§°Ü     
Is not playing=µ±Ç°²»ÔÚ²¥·Å     
Play failed!=²¥·Å²Ù×÷¿ØÖÆÊ§°Ü     
Pause=  ÔÝÍ£           
Play=  ²¥·Å        
Stop play failed!=Í£Ö¹²¥·ÅÊ§°Ü     
Can't capture picture,because the screen is close!=µ±Ç°Î´´ò¿ªÍ¼Ïñ,²»ÄÜ×¥Í¼     
Capture picture failed!=×¥Í¼Ê§°Ü     
This channel is not listening,can't compel frame!=µ±Ç°Í¨µÀ²»ÔÚ¼àÊÓ,²»ÄÜÇ¿ÖÆIÖ¡     
compel frame failed!=Ç¿ÖÆIÖ¡Ê§°Ü     
Save real data has been closed!=±£´æÊµÊ±Êý¾ÝÒÑ¹Ø±Õ     
Monitor=¼àÊÓ     
Preview=Ô¤ÀÀ     
playback channel=»Ø·ÅÍ¨µÀ     
Cycle monitor=ÂÖÑ²     
Start updating....=¿ªÊ¼Éý¼¶....     
Update failed!=Éý¼¶Ê§°Ü     
This screen is not a listening screen!=µ±Ç°»­Ãæ²»ÊÇ¼àÊÓ»­Ãæ     
Start talk failed!=´ò¿ª¶Ô½²Ê§°Ü     
Stop talk failed!=¹Ø±Õ¶Ô½²Ê§°Ü     
Open file failed!=´ò¿ªÎÄ¼þÊ§°Ü     
This channel is cycling!=µ±Ç°Í¨µÀÕýÔÚÂÖÑ²     
Restart device failed!=ÖØÆôÉè±¸Ê§°Ü    
Device has been restarted!=Éè±¸ÒÑÖØÆô     
Close device failed!=¹Ø±ÕÉè±¸Ê§°Ü     
Device has been closed!=Éè±¸ÒÑ¹Ø±Õ     
Save recorder's config failed!=±£´æÉèÖÃÂ¼Ïñ²»Õý³£     
Get recorder's state failed!=»ñÈ¡Â¼Ïñ×´Ì¬´íÎó     
Please choose connected device first!=ÇëÏÈÑ¡ÔñÒÑÁ¬½ÓµÄÉè±¸     
Choose device=Éè±¸Ñ¡Ôñ     
Invalid channel!=Í¨µÀºÅÎÞÐ§     
Channel serial number=Í¨µÀºÅ     
Time input error,Please reinput!=Ê±¼äÊäÈëÓÐÎó£¬ÇëÖØÐÂÊäÈë     
Time input=Ê±¼äÊäÈë     
Query fail!=²éÑ¯Ê§°Ü     
no record!=²éÎÞ¼ÇÂ¼     
Query list=ÁÐ±í²éÑ¯     
Query alarm=±¨¾¯²éÑ¯     
Query card=¿¨ºÅ²éÑ¯     
device and channel=Éè±¸ºÍÍ¨µÀ     
Start time=¿ªÊ¼Ê±¼ä     
Sixe=´óÐ¡     
download call-back failed=ÏÂÔØ»Øµ÷³ö´í     
download successfully=ÏÂÔØÍê±Ï     
Query files and Choose file to download!=Çë²éÑ¯ºÍÑ¡ÔñÒªÏÂÔØµÄÎÄ¼þ     
Start=¿ªÊ¼    
Cancel downloading=ÏÂÔØÒÑÍ£Ö¹     
Downloading has been Canceled!=Çë²éÑ¯ºÍÑ¡ÔñÒª²¥·ÅµÄµÄÎÄ¼þ     
Play=²¥·Å     
Query files and Choose file to play!=ÏÂÔØÊ§°Ü£¬ÇëÖØÊÔ     
Cancel downloading fail!=Í£Ö¹ÏÂÔØÊ§°Ü     
frame rate range:1-120=Ö¡ÂÊ·¶Î§1-120     
Screen is blank,You can choose monitor or choose play-back picture!=µ±Ç°ÏÔÊ¾»­Ãæ¿Õ°×£¬¿ÉÒÔÑ¡Ôñ¼àÊÓ»ò»Ø·ÅÍ¼Ïñ     
Monitor network!=ÍøÂç¼àÊÓ     
Play-back by network!=ÍøÂç»Ø·Å     
Preview by network!=ÍøÂçÔ¤ÀÀ    
Preview Parameter=Ô¤ÀÀ²ÎÊý
Absoluteness=ÂÖÑ²¼àÊÓ     
Device select!= ÎÞÏÞÖÆ      
Limit the data stream failed!=ÏÞ¶¨ÂëÁ÷Ê§°Ü     
Bit=Î»     
1 Bit= 1 Î»      
1.5 Bit= 1.5 Î»      
2 Bit= 2 Î»      
Uncheckout=ÎÞÐ£Ñé     
Odd=ÆæÐ£Ñé     
Even=Å¼Ð£Ñé     
Close COM=¹Ø±Õ´®¿Ú     
Open COM=´ò¿ª´®¿Ú     
Open trans COM failed!=´ò¿ªÍ¸Ã÷´®¿ÚÊ§°Ü     
Send data failed!=·¢ËÍÊý¾ÝÊ§°Ü     
Open Channel failed!=ÂÖÑ²ÖÐ´ò¿ªÍ¨µÀÊ§°Ü     
Close Channel failed!=ÂÖÑ²ÖÐÍ¨µÀ¹Ø±ÕÊ§°Ü     
Stop cycle error!=Í£Ö¹ÂÖÑ²³ö´í!     
Stop monitor error!=Í£Ö¹ÊµÊ±¼àÊÓ³ö´í!     
Stop play-back error!=Í£Ö¹ÍøÂç»Ø·Å³ö´í!     
Stop multi-play error!=Í£Ö¹¶à»­ÃæÔ¤ÀÀ³ö´í!     
Device=Éè±¸     
Channel=Í¨µÀ     
Screen=ÆÁÄ»     
Unbroad-cast device=·Ç¹ã²¥Éè±¸     
Broad-cast device=¹ã²¥Éè±¸     
User config=ÓÃ»§ÅäÖÃ  
User Manage=ÓÃ»§¹ÜÀí
IO Control=IO¿ØÖÆ
All channels=È«²¿Í¨µÀ     
Stop record=Í£Ö¹Â¼Ïñ     
Remote record!=Ô¶³ÌÂ¼Ïñ     
Get channel's parameter fail!=»ñÈ¡²ÎÊýÊ§°Ü!Í¨µÀ:     
Password check failed! =ÃÜÂëÐ£Ñé²»ÕýÈ·£¡     
Close audio failed!=¹Ø±ÕÒôÆµÊ§°Ü     
Open audio failed!=´ò¿ªÒôÆµÊ§°Ü   
Alarm Decoder=±¨¾¯½âÂëÆ÷
End time=½áÊøÊ±¼ä
Size=´óÐ¡

Channel_%d=Í¨µÀ:%d
Resources: =×ÊÔ´:
++++++++write count : %d\n=+++++++++Ð´ÎÄ¼þ¼ÆÊý:%d\n

Shelter Alarm=ÕÚµ²±¨¾¯:
Motion Detect:=¶¯Ì¬¼ì²â:
Video Loss:=ÊÓÆµ¶ªÊ§:
Sound Detect£º=ÒôÆµ¼ì²â:
Serial No:=ÐòÁÐºÅ:
Client State:=¿Í»§×´Ì¬:

Add User=Ìí¼ÓÓÃ»§
Modify User=ÐÞ¸ÄÓÃ»§
Delete User=É¾³ýÓÃ»§
ModifyPSW=ÐÞ¸ÄÃÜÂë
Add Group=Ìí¼Ó×é
Delete Group=É¾³ý×é
Modify Group=ÐÞ¸Ä×é


User Group=ÓÃ»§×é
User Name=ÓÃ»§Ãû
Group Name=×éÃû
Memo=±¸×¢
Reuseable=¸´ÓÃ
Submit=²Ù×÷

Primary user info=Ô­ÓÃ»§ÐÅÏ¢
New user info=ÐÂÓÃ»§ÐÅÏ¢
Submit=²Ù×÷

PreviewType:=Ô¤ÀÀÀàÐÍ:
StartChannel:=ÆðÊ¼Í¨µÀ:

Incorrect Password=ÃÜÂë²»ÕýÈ· 
User not Exist=ÕÊ»§²»´æÔÚ 
Login Timeout=µÈ´ýµÇÂ¼·µ»Ø³¬Ê± 
Curent User Has Logined=ÕÊºÅÒÑµÇÂ¼
Curent User Locked=ÕÊºÅÒÑ±»Ëø¶¨ 
Curent User Invalid=ÕÊºÅÒÑ±»ÁÐÎªºÚÃûµ¥ 
System Busy=×ÊÔ´²»×ã£¬ÏµÍ³Ã¦ 
Cant find host=Á¬½ÓÖ÷»úÊ§°Ü 
MaxConncet=³¬³ö×î´óÁ¬½ÓÊý
Protocol 3 Only=Ö»Ö§³Ö3´úÐ­Òé
UKey Lost=Éè±¸Î´²åÈëU¶Ü»òU¶ÜÐÅÏ¢´íÎó
No Authorized=¿Í»§¶ËIPµØÖ·Ã»ÓÐµÇÂ¼È¨ÏÞ
Network Error=ÍøÂçÁ¬½ÓÊ§°Ü 
MaxConnect Error=³¬³ö×î´óÁ¬½ÓÊý
Start Listen Error=Éè±¸¼àÌý³ö´í 
device disconnect=Éè±¸¶ÏÏß 
Set Alarm Input Error=ÉèÖÃIOÊäÈë²»Õý³£ 
Set Alarm Output Error=ÉèÖÃIOÊä³ö²»Õý³£ 
Input Alarm in Counter Error=ÊäÈë±¨¾¯Í¨µÀ´óÓÚ×î´óÖµ 
Get Alarm Status Error=»ñÈ¡±¨¾¯×´Ì¬´íÎó 
Bad Disk:=»µÓ²ÅÌ: 
Alarm:=±¨¾¯: 
Alarm Decoder=±¨¾¯½âÂëÆ÷ 
Record:=Â¼Ïñ: 
Motion Detect:=¶¯Ì¬¼ì²â:
Video Loss:=ÊÓÆµ¶ªÊ§: 
Client State:=×´Ì¬: 
Sound Detect£º=ÒôÆµ±¨¾¯£º
Shelter Alarm=ÕÚµ²±¨¾¯£º 
Disk Full£º=Ó²ÅÌÂú£º
Serial No:=ÐòÁÐºÅ: 
Shelter Alarm:=ÕÚµ²±¨¾¯: 
Recording:=Â¼Ïñ×´Ì¬: 
Device Status    :  =Éè±¸×´Ì¬      :   
No error=Õý³£ 
cpu Use out=cpuÕ¼ÓÃ¹ý¸ß 
Hardware Error=Ó²¼þ´íÎó 
Unknown Error=´íÎóÔ­Òò²»Ã÷ 
   Device display status: =   Éè±¸ÏÔÊ¾×´Ì¬: 
Unnormal=²»Õý³£ 
Record Channel        :  =Â¼ÏñÍ¨µÀ        :  
Video Lost Channel:  =ÐÅºÅ¶ªÊ§Í¨µÀ:  
Hardware Error Channel:  =Ó²¼þÒì³£Í¨µÀ: 
Alarm Input:  =ÊäÈë¶Ë¿Ú±¨¾¯: 
Alarm Output:  =Êä³ö¶Ë¿Ú±¨¾¯:   
No Channel Openned=Í¨µÀÃ»´ò¿ª
PTZ Control Failed=ÔÆÌ¨²Ëµ¥¿ØÖÆ²Ù×÷Ê§°Ü 
single=µ¥»­Ãæ 
split-4=ËÄ»­Ãæ 
split-9=¾Å»­Ãæ 
split-16=Ê®Áù»­Ãæ
No device selected=ÇëÏÈÁ¬½ÓÉè±¸ºÍÔÚÉÏ±íÖÐÑ¡ÖÐ 
Playing back net-file.=µ±Ç°»­ÃæÕýÔÚ²¥·Å,ÇëÏÈ¹Ø±Õµ±Ç°²¥·Å¹¦ÄÜ
Open channel failed=´ò¿ªÍ¨µÀÊ§°Ü£¬¿ÉÄÜÍ¨µÀÒÑ¾­ÔÚ±ðµÄ´°¿ÚÖÐ´ò¿ªÁË
No Multi-Preview=ÎÞ¶à»­ÃæÔ¤ÀÀ 
Save data failed=±£´æÊý¾ÝÊ§°Ü
Open net-play failed=´ò¿ª²¥·ÅÊ§°Ü
PTZ command failed, check the parameter=ÔÆÌ¨¿ØÖÆ²ÎÊý³ö´í»òÃüÁî²»ÊµÏÖ
Screen closed=µ±Ç°»­ÃæÃ»´ò¿ª
Not playing=µ±Ç°²»ÔÚ²¥·Å
Playing control failed= ²¥·Å²Ù×÷¿ØÖÆÊ§°Ü
  Pauze  =  ÔÝÍ£ 
  Play  =  ²¥·Å 
Stop playing failed=Í£Ö¹²¥·ÅÊ§°Ü 
Screen closed. Cannot capture=µ±Ç°Î´´ò¿ªÍ¼Ïñ,²»ÄÜ×¥Í¼ 
Capture failed=×¥Í¼Ê§°Ü 
Cannot compel I frame=µ±Ç°Í¨µÀ²»ÔÚ¼àÊÓ,²»ÄÜÇ¿ÖÆIÖ¡
Compel I frame failed=Ç¿ÖÆIÖ¡Ê§°Ü 
Saving real data  stopped=±£´æÊµÊ±Êý¾ÝÒÑ¹Ø±Õ 
Monitor=¼àÊÓ 
Preview=Ô¤ÀÀ 
Play back channel=»Ø·ÅÍ¨µÀ 
Cycle Monitor=ÂÖÑ² 
Upgrading....=¿ªÊ¼Éý¼¶.... 
Upgrade failed=Éý¼¶Ê§°Ü
No monitor screen selected=µ±Ç°»­Ãæ²»ÊÇ¼àÊÓ»­Ãæ
Open talk-channel failed=´ò¿ª¶Ô½²Ê§°Ü
Close talk-channel failed=¹Ø±Õ¶Ô½²Ê§°Ü
Canceled=´ò¿ªÎÄ¼þÊ§°Ü 
Current channel is within cycle monitor list!=µ±Ç°Í¨µÀÕýÔÚÂÖÑ²
Reboot device failed=ÖØÆôÉè±¸Ê§°Ü
Reboot done=Éè±¸ÒÑÖØÆô 
Shut down device failed=¹Ø±ÕÉè±¸Ê§°Ü 
Shut down done=Éè±¸ÒÑ¹Ø±Õ
Setup recording config failed=±£´æÉèÖÃÂ¼Ïñ²»Õý³£
Query record status failed=»ñÈ¡Â¼Ïñ×´Ì¬´íÎó 
Select device=Éè±¸Ñ¡Ôñ
Channel number invalid=Í¨µÀºÅÎÞÐ§
Channel Num=Í¨µÀºÅ 
Time input Erroe=Ê±¼äÊäÈëÓÐÎó£¬ÇëÖØÐÂÊäÈë
Time input=Ê±¼äÊäÈë
Query failed=²éÑ¯Ê§°Ü
No record=²éÎÞ¼ÇÂ¼ 
Query-list=ÁÐ±í²éÑ¯
Query-alarm=±¨¾¯²éÑ¯
Query-card=¿¨ºÅ²éÑ¯ 
Device and channel=Éè±¸ºÍÍ¨µÀ
Start time=¿ªÊ¼Ê±¼ä 
End time=½áÊøÊ±¼ä
Size=´óÐ¡ 
Download callback failed=ÏÂÔØ»Øµ÷³ö´í 
Download complete=ÏÂÔØÍê±Ï
Select file for download=Çë²éÑ¯ºÍÑ¡ÔñÒªÏÂÔØµÄÎÄ¼þ
Start=¿ªÊ¼ 
Stop=Í£Ö¹
Download Stopped=ÏÂÔØÒÑÍ£Ö¹
Select file for playing=Çë²éÑ¯ºÍÑ¡ÔñÒª²¥·ÅµÄµÄÎÄ¼þ
Play=²¥·Å 
Start Download Failed!=ÏÂÔØÊ§°Ü£¬ÇëÖØÊÔ
Stop Download Failed!=Í£Ö¹ÏÂÔØÊ§°Ü 
Illegal framerate!=Ö¡ÂÊ·¶Î§1-120 
Blank=µ±Ç°ÏÔÊ¾»­Ãæ¿Õ°×£¬¿ÉÒÔÑ¡Ôñ¼àÊÓ»ò»Ø·ÅÍ¼Ïñ
Net-play=ÍøÂç¼àÊÓ 
Cyclemonitor=ÂÖÑ²¼àÊÓ 
 No limit = ÎÞÏÞÖÆ  
Select device first=ÇëÏÈÑ¡ÔñÒÑÁ¬½ÓµÄÉè±¸ 
Limiting rate failed=ÏÞ¶¨ÂëÁ÷Ê§°Ü 
bit=Î» 
 1 bit= 1 Î»
 1.5 bits= 1.5 Î»
 2 bits= 2 Î» 
No parity=ÎÞÐ£Ñé 
Odd parity=ÆæÐ£Ñé 
Even parity=Å¼Ð£Ñé 
Close com=¹Ø±Õ´®¿Ú 
Open com=´ò¿ª´®¿Ú 
Open com failed=´ò¿ªÍ¸Ã÷´®¿ÚÊ§°Ü
Send data failed=·¢ËÍÊý¾ÝÊ§°Ü
Open channel failed while cycle monitoring=ÂÖÑ²ÖÐ´ò¿ªÍ¨µÀÊ§°Ü
Stop cycle monitor error!=Í£Ö¹ÂÖÑ²³ö´í! 
Stop monitor error!=Í£Ö¹ÊµÊ±¼àÊÓ³ö´í!
Stop net playback error!=Í£Ö¹ÍøÂç»Ø·Å³ö´í! 
Stop Multiplay error!=Í£Ö¹¶à»­ÃæÔ¤ÀÀ³ö´í! 
Device=Éè±¸
Channel=Í¨µÀ
Scrn=ÆÁÄ» 
UnBroadcast Dev=·Ç¹ã²¥Éè±¸
Broadcast Dev=¹ã²¥Éè±¸ 
Serial com=´®¿ÚÊôÐÔ
Alarm=±¨¾¯ÊôÐÔ 
Record=Â¼ÏñÅäÖÃ
User=ÓÃ»§ÅäÖÃ
Network=ÍøÂçÅäÖÃ
All input=È«²¿±¨¾¯Á¿
Input=±¨¾¯Á¿
All output=È«²¿±¨¾¯Êä³ö
Output=±¨¾¯Êä³ö 
Get alarm-input config failed=»ñÈ¡±¨¾¯²ÎÊýÊ§°Ü!
Get alarm-output config failed=»ñÈ¡±¨¾¯Êä³ö²ÎÊýÊ§°Ü! 
Hour range error=Ð¡Ê±µÄ·¶Î§ÔÚ0 -- 24Ö®¼ä!
Minute range error=·ÖÖÓµÄ·¶Î§ÔÚ0 -- 60Ö®¼ä! 
Timing length exceed 24:00=²¼·ÀÊ±¼ä²»ÄÜ³¬¹ý24:00! 
Timing illegal=²¼·ÀÆðÊ¼Ê±¼ä²»ÄÜ´óÓÚÍ£Ö¹Ê±¼ä!
All channel=È«²¿Í¨µÀ
Stop recording=Í£Ö¹Â¼Ïñ 
Remote record=Ô¶³ÌÂ¼Ïñ
Get config failed! Channel:=»ñÈ¡²ÎÊýÊ§°Ü!Í¨µÀ: 
PSW check error=ÃÜÂëÐ£Ñé²»ÕýÈ·£¡
Failed to open sound=¹Ø±ÕÒôÆµÊ§°Ü 
Failed to close sound=´ò¿ªÒôÆµÊ§°Ü
  --NetSDK Version:=  --NetSDK°æ±¾: 
Open file=´ò¿ªÎÄ¼þ
failed=Ê§°Ü 
Error=´íÎó 
Not BIOS Upgrade file!=µ±Ç°ÎÄ¼þ²»ÊÇÕýÈ·µÄÉý¼¶ÎÄ¼þ
Start Upgrade Failed=¿ªÊ¼Éý¼¶Ê§°Ü
Send upgrade Failed=·¢ËÍÉý¼¶ÎÄ¼þÊ§°Ü
StopUpgrade Failed=½áÊøÉý¼¶Ê§°Ü 
Upgrade done. Device rebooting=Éý¼¶Íê³É£¬Éè±¸¼´½«ÖØÆô
All files transfered, please wait...=ÎÄ¼þÒÑ´«ËÍÍê±Ï£¬ÇëµÈ´ý..
Upgrade progress=Éý¼¶½ø¶È
Normal=³£¹æ
Advance=¸ß¼¶
PTZ=ÔÆÌ¨ 
DevList=Éè±¸±í
Color=ÑÕÉ«
CBData=»Øµ÷
PBCtrl=»Ø·Å
Channel:=Í¨µÀ:
Total:=È«²¿:
Windows system error=WindowsÏµÍ³³ö´í
Network error, probably because of network-time-out=ÍøÂç´íÎó£¬¿ÉÄÜÊÇÒòÎªÍøÂç³¬Ê±
No match protocol=Éè±¸Ð­Òé²»Æ¥Åä
Invalid handle=¾ä±úÎÞÐ§ 
Failed to open channel=´ò¿ªÍ¨µÀÊ§°Ü
Failed to close channel=¹Ø±ÕÍ¨µÀÊ§°Ü
Illegal parameter=ÓÃ»§²ÎÊý²»ºÏ·¨
Failed to initialize SDK=SDK³õÊ¼»¯³ö´í 
Failed to uninitialize SDK=SDKÇåÀí³ö´í
Failed to open render=ÉêÇërender×ÊÔ´³ö´í 
Failed to open decoder=´ò¿ª½âÂë¿â³ö´í
Failed to close decoder=¹Ø±Õ½âÂë¿â³ö´í 
Channel number is zero=¶à»­ÃæÔ¤ÀÀÖÐ¼ì²âµ½Í¨µÀÊýÎª0
Failed to initialize Recoder=Â¼Òô¿â³õÊ¼»¯Ê§°Ü
Recorder is not initialized=Â¼Òô¿âÎ´¾­³õÊ¼»¯
Error while sending audio data=·¢ËÍÒôÆµÊý¾Ý³ö´í 
No talking channel found=Î´·¢ÏÖÓïÒôÍ¨µÀ
Audio not openned=¸ÃÍ¨µÀÎ´´ò¿ªÒôÆµ
Already saving real data=ÊµÊ±Êý¾ÝÒÑ¾­´¦ÓÚ±£´æ×´Ì¬
Not saving real data=Î´±£´æÊµÊ±Êý¾Ý
Failed to open file=´ò¿ªÎÄ¼þ³ö´í
Failed to active PTZ timer=Æô¶¯ÔÆÌ¨¿ØÖÆ¶¨Ê±Æ÷Ê§°Ü
Unexpected data received=¶Ô·µ»ØÊý¾ÝµÄÐ£Ñé³ö´í
Insufficient buffer=Ã»ÓÐ×ã¹»µÄ»º´æ
Not supported=µ±Ç°SDKÎ´Ö§³Ö¸Ã¹¦ÄÜ
No record found=²éÑ¯²»µ½Â¼Ïñ
Curent User is Locked=µ±Ç°ÓÃ»§±»Ëø¶¨
Curent User is in blacklist=ÓÃ»§±»ÁÐ½øºÚÃûµ¥
System Busying=ÏµÍ³Ã¦
Connect Error=Á¬½Ó´íÎó
Render error: open audio=Render¿â´ò¿ªÒôÆµ³ö´í 
Render error: close audio=Render¿â¹Ø±ÕÒôÆµ³ö´í
Render error: set volume=Render¿â¿ØÖÆÒôÁ¿³ö´í 
Render error: set image parameter=Render¿âÉèÖÃ»­Ãæ²ÎÊý³ö´í
Render error: pause play=Render¿âÔÝÍ£²¥·Å³ö´í
Render error: snap picture=Render¿â×¥Í¼³ö´í
Render error: step=Render¿â²½½ø³ö´í 
Render error: set framerate=Render¿âÉèÖÃÖ¡ÂÊ³ö´í
Device is busy=ÔÝÊ±ÎÞ·¨ÉèÖÃ
Illegal config data=ÅäÖÃÊý¾Ý²»ºÏ·¨
The SDK is not initialized=CLientSDKÎ´¾­³õÊ¼»¯
Download ended=ÏÂÔØÒÑ½áÊø
FullScreen=È«ÆÁÏÔÊ¾
MultiScreen=¶àÆÁÏÔÊ¾
AutoAdjust=×Ô¶¯µ÷Õû 
AlarmIn=±¨¾¯ÊäÈë
Motion=¶¯Ì¬¼ì²â
VideoLost=ÊÓÆµ¶ªÊ§
Blind=ÊÓÆµÕÚµ²
DiskAlarm=Ó²ÅÌ±¨¾¯
Whole week=Õû¸öÐÇÆÚ
Monday=ÐÇÆÚÒ» 
Tuesday=ÐÇÆÚ¶þ
Wedensday=ÐÇÆÚÈý
Thursday=ÐÇÆÚËÄ
Friday=ÐÇÆÚÎå
Saturday=ÐÇÆÚÁù 
Sunday=ÐÇÆÚÌì 
N_Open=³£¿ª 
N-Close=³£±Õ
10MBase-T=10MBase-T
10MBase-T full-duplex=10MBase-TÈ«Ë«¹¤ 
100MBase-TX=100MBase-TX 
100M full-duplex=100MÈ«Ë«¹¤
10M/100M Adapted=10M/100M×ÔÊÊÓ¦
Alarm server=±¨¾¯·þÎñÆ÷
Log server=ÈÕÖ¾·þÎñÆ÷ 
SMTP server=SMTP·þÎñÆ÷
Multi cast=¶à²¥×é 
NFS server=NFS·þÎñÆ÷
Ftp server=Ftp·þÎñÆ÷
PPPoE server=PPPoE·þÎñÆ÷
DDNS server=DDNS·þÎñÆ÷ 
DNS server=DNS·þÎñÆ÷
Regist IP=×¢²áIP
DDNS host-name=DDNSÖ÷»úÃû
Apply successful=±£´æ³É¹¦
MainStream=Ö÷ÂëÁ÷ 
SubStream_1=´ÓÂëÁ÷_1
SubStream_2=´ÓÂëÁ÷_2 
SubStream_3=´ÓÂëÁ÷_3 

Input port first!=ÇëÊäÈë¶Ë¿ÚºÅ!
SendPeri=Éý¼¶ÍâÉè½ÓÈë´ÓÆ¬
SendGeoInfo=Éý¼¶µØÀíÐÅÏ¢¶¨Î»Ð¾Æ¬

Query com param failed=²éÑ¯´®¿Ú²ÎÊýÊ§°Ü
ComPort=´®¿ÚºÅ
ComState=´®¿Ú×´Ì¬
IsOpened=ÊÇ·ñ´ò¿ª
BaundRate=²¨ÌØÂÊ
DataBit=Êý¾ÝÎ»
StopBit=Í£Ö¹Î»
ParityBit=Ð£Ñé

Failed to get ptz location=»ñÈ¡ÔÆÌ¨Î»ÖÃÊ§°Ü
Old Password=¾ÉÃÜÂë
New Password=ÐÂÃÜÂë
Confirm Password=È·ÈÏÃÜÂë
Add group failed!=Ôö¼Ó×éÊ§°Ü

checkout return data error!=¶Ô·µ»ØÊý¾ÝµÄÐ£Ñé³ö´í!
Input error!=ÊäÈëÓÐÎó!
The group is existing!=×éÃûÒÑ´æÔÚ!
The group's right is out of the list's range.=×éµÄÈ¨ÏÞ³¬³öÈ¨ÏÞÁÐ±í·¶Î§!
Add user group failed!=Ôö¼ÓÓÃ»§×éÊ§°Ü!
Reserved account is not able to modify password!=±£ÁôÕÊºÅ£¬²»ÈÝÐíÐÞ¸ÄÃÜÂë!
The password is not matching!=ÃÜÂë²»Æ¥Åä£¨ÐÂÃÜÂëÊäÈëÁ½´Î²»Ò»ÖÂ£©!
Modify user password failed!=ÐÞ¸ÄÓÃ»§ÃÜÂëÊ§°Ü!
Input  password error, please input again.=ÄúÊäÈëµÄÃÜÂë²»Æ¥Åä£¬ÇëÔÚÁ½¸ö¿òÖÐÖØÐÂÊäÈëÃÜÂë!
The user is not existing!=ÒªÐÞ¸ÄµÄÓÃ»§²»´æÔÚ!
The user is existing!=ÓÃ»§ÒÑ´æÔÚ£¨ÓÃ»§ÃûÖØ¸´£©!
The user's right is out of the group's right!=ÓÃ»§È¨ÏÞ³¬¹ý×éÈ¨ÏÞ!
Modify user info failed!=ÐÞ¸ÄÓÃ»§ÐÅÏ¢Ê§°Ü!
Modify group failed!=ÐÞ¸Ä×éÊ§°Ü
Add user failed!=Ôö¼ÓÓÃ»§Ê§°Ü
The group isn't existing!=ÓÃ»§×é²»´æÔÚ
trigger failed!=´¥·¢Ê§°Ü£¡
not enough space in disk!=´ÅÅÌ¿Õ¼ä²»×ã£¡
The password is not match, please input again=Á½´ÎÊäÈëÃÜÂë²»Ò»ÖÂ£¬ÖØÐÂÊäÈë
Modify Password=ÐÞ¸ÄÃÜÂë
Add User Group=Ôö¼ÓÓÃ»§×é
Invalid password!=ÃÜÂëÎÞÐ§
Set split mode failed=ÉèÖÃ·Ö¸îÄ£Ê½Ê§°Ü
Have no enough space in disk!=´ÅÅÌ¿Õ¼ä²»×ã£¡
