# Supplementary material
Source: MDPI journal article supplement (https://www.mdpi.com/2077-1312/10/8/1051)
Supplement: s1 [file s1 › OSNSystem/OSNSystem/OSNSystem/bin/Debug/LocalIPandPort.xml]

<?xml version="1.0" standalone="yes"?>
<NewDataSet>
  <Table1>
    <srvIP>10.182.12.61</srvIP>
    <AJunctionIP>192.168.1.182</AJunctionIP>
    <BJunctionIP>192.168.1.187</BJunctionIP>
    <srvDataCollectPort>8001</srvDataCollectPort>
    <srvJunctionBoxAPort>8082</srvJunctionBoxAPort>
    <srvJunctionBoxBPort>8087</srvJunctionBoxBPort>   
  </Table1>
</NewDataSet>
