# Supplementary material
Source: MDPI journal article supplement (https://www.mdpi.com/2077-1312/10/8/1051)
Supplement: s1 [file s1 › OSNSystem/OSNSystem/OSNSystem/bin/Debug/LogConnectStatus.txt]

Log Entry : 14:29:21 2018年6月13日 

数据采集器1断开！

------------------------------------


Log Entry : 15:08:14 2018年6月13日 

数据采集器1断开！

------------------------------------


Log Entry : 15:23:36 2018年6月13日 

断开！

------------------------------------


Log Entry : 11:04:39 2018年6月14日 

数据采集器1断开！

------------------------------------


Log Entry : 11:09:40 2018年6月14日 

断开！

------------------------------------


Log Entry : 11:15:28 2018年6月14日 

数据采集器1断开！

------------------------------------


Log Entry : 11:22:33 2018年6月14日 

数据采集器1断开！

------------------------------------


Log Entry : 13:16:48 2018年6月14日 

数据采集器1断开！

------------------------------------


Log Entry : 13:32:04 2018年6月14日 

断开！

------------------------------------


Log Entry : 13:29:52 2018年6月26日 

数据采集器1断开！

------------------------------------


Log Entry : 14:17:41 2018年6月26日 

数据采集器1断开！

------------------------------------


Log Entry : 11:39:29 2018年6月27日 

断开！

------------------------------------


Log Entry : 11:46:44 2018年6月27日 

断开！

------------------------------------


Log Entry : 13:06:39 2018年6月27日 

数据采集器1断开！

------------------------------------


Log Entry : 13:59:50 2018年6月27日 

数据采集器1断开！

------------------------------------


Log Entry : 14:15:41 2018年6月27日 

断开！

------------------------------------


Log Entry : 16:58:36 2018年6月27日 

数据采集器1断开！

------------------------------------


Log Entry : 10:43:42 2018年6月28日 

数据采集器1断开！

------------------------------------


Log Entry : 14:14:30 2018年6月28日 

数据采集器1断开！

------------------------------------


Log Entry : 15:13:53 2018年6月28日 

数据采集器1断开！

------------------------------------


Log Entry : 16:55:34 2018年6月28日 

数据采集器1断开！

------------------------------------


Log Entry : 10:39:02 2018年6月29日 

数据采集器1断开！

------------------------------------


Log Entry : 13:41:26 2018年7月2日 

数据采集器1断开！

------------------------------------


Log Entry : 10:33:34 2018年7月6日 

数据采集器1断开！

------------------------------------


Log Entry : 10:40:07 2018年7月6日 

数据采集器1断开！

------------------------------------


Log Entry : 16:27:50 2020年7月6日 

断开！

------------------------------------


Log Entry : 13:42:30 2020年7月7日 

断开！

------------------------------------


Log Entry : 13:48:07 2020年7月7日 

断开！

------------------------------------


Log Entry : 13:54:53 2020年7月7日 

断开！

------------------------------------


Log Entry : 14:38:13 2020年7月7日 

断开！

------------------------------------


Log Entry : 14:46:05 2020年7月7日 

断开！

------------------------------------


Log Entry : 15:01:28 2020年7月7日 

断开！

------------------------------------


Log Entry : 14:47:49 2020年7月15日 星期三 

断开！

------------------------------------


Log Entry : 15:08:27 2020年7月20日 星期一 

断开！

------------------------------------


Log Entry : 15:08:27 2020年7月20日 星期一 

断开！

------------------------------------


Log Entry : 15:20:25 2020年7月20日 星期一 

断开！

------------------------------------


Log Entry : 15:20:25 2020年7月20日 星期一 

断开！

------------------------------------


Log Entry : 15:30:33 2020年7月20日 星期一 

断开！

------------------------------------


Log Entry : 15:31:35 2020年7月20日 星期一 

断开！

------------------------------------


Log Entry : 15:32:36 2020年7月20日 星期一 

断开！

------------------------------------


Log Entry : 15:33:37 2020年7月20日 星期一 

断开！

------------------------------------


Log Entry : 15:34:38 2020年7月20日 星期一 

断开！

------------------------------------


Log Entry : 15:35:39 2020年7月20日 星期一 

断开！

------------------------------------


Log Entry : 15:36:41 2020年7月20日 星期一 

断开！

------------------------------------


Log Entry : 15:37:41 2020年7月20日 星期一 

断开！

------------------------------------


Log Entry : 15:38:42 2020年7月20日 星期一 

断开！

------------------------------------


Log Entry : 15:39:43 2020年7月20日 星期一 

断开！

------------------------------------


Log Entry : 15:40:44 2020年7月20日 星期一 

断开！

------------------------------------


Log Entry : 15:41:45 2020年7月20日 星期一 

断开！

------------------------------------


Log Entry : 15:42:46 2020年7月20日 星期一 

断开！

------------------------------------


Log Entry : 15:43:47 2020年7月20日 星期一 

断开！

------------------------------------


Log Entry : 15:44:48 2020年7月20日 星期一 

断开！

------------------------------------


Log Entry : 15:45:49 2020年7月20日 星期一 

断开！

------------------------------------


Log Entry : 15:46:50 2020年7月20日 星期一 

断开！

------------------------------------


Log Entry : 15:47:51 2020年7月20日 星期一 

断开！

------------------------------------


Log Entry : 15:48:52 2020年7月20日 星期一 

断开！

------------------------------------


Log Entry : 15:49:53 2020年7月20日 星期一 

断开！

------------------------------------


Log Entry : 15:50:54 2020年7月20日 星期一 

断开！

------------------------------------


Log Entry : 15:51:55 2020年7月20日 星期一 

断开！

------------------------------------


Log Entry : 15:52:56 2020年7月20日 星期一 

断开！

------------------------------------


Log Entry : 15:53:57 2020年7月20日 星期一 

断开！

------------------------------------


Log Entry : 09:48:38 2020年7月21日 星期二 

断开！

------------------------------------


Log Entry : 09:49:39 2020年7月21日 星期二 

断开！

------------------------------------


Log Entry : 09:50:40 2020年7月21日 星期二 

断开！

------------------------------------


Log Entry : 09:51:41 2020年7月21日 星期二 

断开！

------------------------------------


Log Entry : 09:52:42 2020年7月21日 星期二 

断开！

------------------------------------


Log Entry : 09:53:43 2020年7月21日 星期二 

断开！

------------------------------------


Log Entry : 09:54:45 2020年7月21日 星期二 

断开！

------------------------------------


Log Entry : 09:55:46 2020年7月21日 星期二 

断开！

------------------------------------


Log Entry : 09:56:47 2020年7月21日 星期二 

断开！

------------------------------------


Log Entry : 09:57:47 2020年7月21日 星期二 

断开！

------------------------------------


Log Entry : 09:58:48 2020年7月21日 星期二 

断开！

------------------------------------


Log Entry : 09:59:49 2020年7月21日 星期二 

断开！

------------------------------------


Log Entry : 10:00:50 2020年7月21日 星期二 

断开！

------------------------------------


Log Entry : 10:01:52 2020年7月21日 星期二 

断开！

------------------------------------


Log Entry : 10:02:52 2020年7月21日 星期二 

断开！

------------------------------------


Log Entry : 10:03:53 2020年7月21日 星期二 

断开！

------------------------------------


Log Entry : 10:04:54 2020年7月21日 星期二 

断开！

------------------------------------


Log Entry : 10:05:55 2020年7月21日 星期二 

断开！

------------------------------------


Log Entry : 10:06:56 2020年7月21日 星期二 

断开！

------------------------------------


Log Entry : 10:07:57 2020年7月21日 星期二 

断开！

------------------------------------


Log Entry : 10:08:58 2020年7月21日 星期二 

断开！

------------------------------------


Log Entry : 10:09:59 2020年7月21日 星期二 

断开！

------------------------------------


Log Entry : 10:11:00 2020年7月21日 星期二 

断开！

------------------------------------


Log Entry : 10:12:01 2020年7月21日 星期二 

断开！

------------------------------------


Log Entry : 10:13:02 2020年7月21日 星期二 

断开！

------------------------------------


Log Entry : 10:14:03 2020年7月21日 星期二 

断开！

------------------------------------


Log Entry : 10:15:04 2020年7月21日 星期二 

断开！

------------------------------------


Log Entry : 10:16:05 2020年7月21日 星期二 

断开！

------------------------------------


Log Entry : 10:17:06 2020年7月21日 星期二 

断开！

------------------------------------


Log Entry : 10:18:07 2020年7月21日 星期二 

断开！

------------------------------------


Log Entry : 10:57:49 2020年7月21日 星期二 

断开！

------------------------------------


Log Entry : 10:58:51 2020年7月21日 星期二 

断开！

------------------------------------


Log Entry : 10:59:52 2020年7月21日 星期二 

断开！

------------------------------------


Log Entry : 11:00:57 2020年7月21日 星期二 

断开！

------------------------------------


Log Entry : 11:01:48 2020年7月21日 星期二 

断开！

------------------------------------


Log Entry : 11:03:11 2020年7月21日 星期二 

断开！

------------------------------------


Log Entry : 11:05:06 2020年7月21日 星期二 

断开！

------------------------------------


Log Entry : 11:06:11 2020年7月21日 星期二 

断开！

------------------------------------


Log Entry : 11:07:27 2020年7月21日 星期二 

断开！

------------------------------------


Log Entry : 11:09:48 2020年7月21日 星期二 

断开！

------------------------------------


Log Entry : 11:10:54 2020年7月21日 星期二 

断开！

------------------------------------


Log Entry : 11:11:55 2020年7月21日 星期二 

断开！

------------------------------------


Log Entry : 11:12:56 2020年7月21日 星期二 

断开！

------------------------------------


Log Entry : 11:13:57 2020年7月21日 星期二 

断开！

------------------------------------


Log Entry : 11:14:58 2020年7月21日 星期二 

断开！

------------------------------------


Log Entry : 11:15:59 2020年7月21日 星期二 

断开！

------------------------------------


Log Entry : 11:17:00 2020年7月21日 星期二 

断开！

------------------------------------


Log Entry : 11:18:01 2020年7月21日 星期二 

断开！

------------------------------------


Log Entry : 11:19:02 2020年7月21日 星期二 

断开！

------------------------------------


Log Entry : 11:20:03 2020年7月21日 星期二 

断开！

------------------------------------


Log Entry : 11:21:04 2020年7月21日 星期二 

断开！

------------------------------------


Log Entry : 11:22:05 2020年7月21日 星期二 

断开！

------------------------------------


Log Entry : 11:23:06 2020年7月21日 星期二 

断开！

------------------------------------


Log Entry : 11:24:07 2020年7月21日 星期二 

断开！

------------------------------------


Log Entry : 11:25:08 2020年7月21日 星期二 

断开！

------------------------------------


Log Entry : 11:26:09 2020年7月21日 星期二 

断开！

------------------------------------


Log Entry : 11:27:11 2020年7月21日 星期二 

断开！

------------------------------------


Log Entry : 11:28:12 2020年7月21日 星期二 

断开！

------------------------------------


Log Entry : 11:34:47 2020年7月21日 星期二 

断开！

------------------------------------


Log Entry : 11:35:12 2020年7月21日 星期二 

断开！

------------------------------------


Log Entry : 11:35:19 2020年7月21日 星期二 

断开！

------------------------------------


Log Entry : 11:35:26 2020年7月21日 星期二 

断开！

------------------------------------


Log Entry : 11:36:23 2020年7月21日 星期二 

断开！

------------------------------------


Log Entry : 11:36:55 2020年7月21日 星期二 

断开！

------------------------------------


Log Entry : 11:38:00 2020年7月21日 星期二 

断开！

------------------------------------


Log Entry : 13:28:00 2020年7月21日 星期二 

断开！

------------------------------------


Log Entry : 13:28:25 2020年7月21日 星期二 

断开！

------------------------------------


Log Entry : 13:29:23 2020年7月21日 星期二 

断开！

------------------------------------


Log Entry : 13:29:48 2020年7月21日 星期二 

断开！

------------------------------------


Log Entry : 13:30:21 2020年7月21日 星期二 

断开！

------------------------------------


Log Entry : 13:31:51 2020年7月21日 星期二 

断开！

------------------------------------


Log Entry : 13:32:42 2020年7月21日 星期二 

断开！

------------------------------------


Log Entry : 13:33:49 2020年7月21日 星期二 

断开！

------------------------------------


Log Entry : 13:34:50 2020年7月21日 星期二 

断开！

------------------------------------


Log Entry : 13:35:51 2020年7月21日 星期二 

断开！

------------------------------------


Log Entry : 13:36:52 2020年7月21日 星期二 

断开！

------------------------------------


Log Entry : 13:37:53 2020年7月21日 星期二 

断开！

------------------------------------


Log Entry : 13:39:18 2020年7月21日 星期二 

断开！

------------------------------------


Log Entry : 13:40:09 2020年7月21日 星期二 

断开！

------------------------------------


Log Entry : 13:40:23 2020年7月21日 星期二 

断开！

------------------------------------


Log Entry : 13:41:47 2020年7月21日 星期二 

断开！

------------------------------------


Log Entry : 13:42:48 2020年7月21日 星期二 

断开！

------------------------------------


Log Entry : 13:43:49 2020年7月21日 星期二 

断开！

------------------------------------


Log Entry : 13:44:50 2020年7月21日 星期二 

断开！

------------------------------------


Log Entry : 13:45:50 2020年7月21日 星期二 

断开！

------------------------------------


Log Entry : 13:46:51 2020年7月21日 星期二 

断开！

------------------------------------


Log Entry : 13:55:58 2020年7月21日 星期二 

断开！

------------------------------------


Log Entry : 13:56:59 2020年7月21日 星期二 

断开！

------------------------------------


Log Entry : 13:58:00 2020年7月21日 星期二 

断开！

------------------------------------


Log Entry : 13:59:01 2020年7月21日 星期二 

断开！

------------------------------------


Log Entry : 14:04:51 2020年7月21日 星期二 

断开！

------------------------------------


Log Entry : 14:05:53 2020年7月21日 星期二 

断开！

------------------------------------


Log Entry : 14:06:54 2020年7月21日 星期二 

断开！

------------------------------------


Log Entry : 14:24:09 2020年7月21日 星期二 

断开！

------------------------------------


Log Entry : 14:25:10 2020年7月21日 星期二 

断开！

------------------------------------


Log Entry : 14:26:11 2020年7月21日 星期二 

断开！

------------------------------------


Log Entry : 14:27:12 2020年7月21日 星期二 

断开！

------------------------------------


Log Entry : 10:48:33 2020年7月27日 星期一 

数据采集器1断开！

------------------------------------


Log Entry : 10:59:26 2020年7月27日 星期一 

数据采集器1断开！

------------------------------------


Log Entry : 11:35:24 2020年7月27日 星期一 

数据采集器1断开！

------------------------------------


Log Entry : 11:36:26 2020年7月27日 星期一 

数据采集器1断开！

------------------------------------


Log Entry : 13:57:49 2020年7月28日 星期二 

数据采集器1断开！

------------------------------------


Log Entry : 14:06:05 2020年7月30日 星期四 

断开！

------------------------------------


Log Entry : 16:39:39 2020年7月30日 星期四 

断开！

------------------------------------


Log Entry : 11:18:44 2020年7月31日 星期五 

断开！

------------------------------------


Log Entry : 11:21:02 2020年7月31日 星期五 

断开！

------------------------------------


Log Entry : 11:26:54 2020年7月31日 星期五 

断开！

------------------------------------


Log Entry : 11:26:54 2020年7月31日 星期五 

断开！

------------------------------------


Log Entry : 15:38:16 2020年7月31日 星期五 

断开！

------------------------------------


Log Entry : 10:21:18 2020年8月3日 星期一 

断开！

------------------------------------


Log Entry : 10:22:19 2020年8月3日 星期一 

断开！

------------------------------------


Log Entry : 10:23:20 2020年8月3日 星期一 

断开！

------------------------------------


Log Entry : 10:24:21 2020年8月3日 星期一 

断开！

------------------------------------


Log Entry : 11:17:44 2020年8月3日 星期一 

断开！

------------------------------------


Log Entry : 11:19:32 2020年8月3日 星期一 

断开！

------------------------------------


Log Entry : 13:21:00 2020年8月3日 星期一 

断开！

------------------------------------


Log Entry : 13:24:31 2020年8月3日 星期一 

断开！

------------------------------------


Log Entry : 13:26:56 2020年8月3日 星期一 

断开！

------------------------------------


Log Entry : 13:27:10 2020年8月3日 星期一 

断开！

------------------------------------


Log Entry : 13:27:28 2020年8月3日 星期一 

断开！

------------------------------------


Log Entry : 13:27:35 2020年8月3日 星期一 

断开！

------------------------------------


Log Entry : 13:27:36 2020年8月3日 星期一 

断开！

------------------------------------


Log Entry : 13:27:37 2020年8月3日 星期一 

断开！

------------------------------------


Log Entry : 13:27:38 2020年8月3日 星期一 

断开！

------------------------------------


Log Entry : 13:27:39 2020年8月3日 星期一 

断开！

------------------------------------


Log Entry : 13:27:40 2020年8月3日 星期一 

断开！

------------------------------------


Log Entry : 13:27:43 2020年8月3日 星期一 

断开！

------------------------------------


Log Entry : 13:27:44 2020年8月3日 星期一 

断开！

------------------------------------


Log Entry : 13:27:45 2020年8月3日 星期一 

断开！

------------------------------------


Log Entry : 13:27:53 2020年8月3日 星期一 

断开！

------------------------------------


Log Entry : 13:27:54 2020年8月3日 星期一 

断开！

------------------------------------


Log Entry : 13:29:10 2020年8月3日 星期一 

断开！

------------------------------------


Log Entry : 13:30:11 2020年8月3日 星期一 

断开！

------------------------------------


Log Entry : 13:54:02 2020年8月3日 星期一 

断开！

------------------------------------


Log Entry : 14:09:30 2020年8月3日 星期一 

断开！

------------------------------------


Log Entry : 14:12:04 2020年8月3日 星期一 

断开！

------------------------------------


Log Entry : 15:40:14 2020年8月3日 星期一 

断开！

------------------------------------


Log Entry : 15:41:15 2020年8月3日 星期一 

断开！

------------------------------------


Log Entry : 15:42:18 2020年8月3日 星期一 

断开！

------------------------------------


Log Entry : 15:43:19 2020年8月3日 星期一 

断开！

------------------------------------


Log Entry : 15:44:20 2020年8月3日 星期一 

断开！

------------------------------------


Log Entry : 15:46:59 2020年8月3日 星期一 

断开！

------------------------------------


Log Entry : 15:48:00 2020年8月3日 星期一 

断开！

------------------------------------


Log Entry : 15:49:01 2020年8月3日 星期一 

断开！

------------------------------------


Log Entry : 15:50:02 2020年8月3日 星期一 

断开！

------------------------------------


Log Entry : 15:59:36 2020年8月3日 星期一 

断开！

------------------------------------


Log Entry : 16:00:38 2020年8月3日 星期一 

断开！

------------------------------------


Log Entry : 16:01:39 2020年8月3日 星期一 

断开！

------------------------------------


Log Entry : 16:02:40 2020年8月3日 星期一 

断开！

------------------------------------


Log Entry : 13:45:35 2020年8月4日 星期二 

断开！

------------------------------------


Log Entry : 13:48:49 2020年8月4日 星期二 

断开！

------------------------------------


Log Entry : 13:50:09 2020年8月4日 星期二 

断开！

------------------------------------


Log Entry : 13:53:33 2020年8月4日 星期二 

断开！

------------------------------------


Log Entry : 14:03:38 2020年8月4日 星期二 

断开！

------------------------------------


Log Entry : 14:04:54 2020年8月4日 星期二 

断开！

------------------------------------


Log Entry : 14:05:55 2020年8月4日 星期二 

断开！

------------------------------------


Log Entry : 14:07:33 2020年8月4日 星期二 

断开！

------------------------------------


Log Entry : 14:08:49 2020年8月4日 星期二 

断开！

------------------------------------


Log Entry : 14:09:50 2020年8月4日 星期二 

断开！

------------------------------------


Log Entry : 16:00:51 2020年8月4日 星期二 

断开！

------------------------------------


Log Entry : 16:01:52 2020年8月4日 星期二 

断开！

------------------------------------


Log Entry : 16:08:17 2020年8月4日 星期二 

断开！

------------------------------------


Log Entry : 16:09:29 2020年8月4日 星期二 

断开！

------------------------------------


Log Entry : 16:10:31 2020年8月4日 星期二 

断开！

------------------------------------


Log Entry : 16:11:32 2020年8月4日 星期二 

断开！

------------------------------------


Log Entry : 16:12:33 2020年8月4日 星期二 

断开！

------------------------------------


Log Entry : 16:13:34 2020年8月4日 星期二 

断开！

------------------------------------


Log Entry : 16:14:34 2020年8月4日 星期二 

断开！

------------------------------------


Log Entry : 16:15:36 2020年8月4日 星期二 

断开！

------------------------------------


Log Entry : 16:16:37 2020年8月4日 星期二 

断开！

------------------------------------


Log Entry : 16:17:38 2020年8月4日 星期二 

断开！

------------------------------------


Log Entry : 16:18:40 2020年8月4日 星期二 

断开！

------------------------------------


Log Entry : 16:19:41 2020年8月4日 星期二 

断开！

------------------------------------


Log Entry : 16:20:42 2020年8月4日 星期二 

断开！

------------------------------------


Log Entry : 16:21:43 2020年8月4日 星期二 

断开！

------------------------------------


Log Entry : 16:22:44 2020年8月4日 星期二 

断开！

------------------------------------


Log Entry : 16:23:45 2020年8月4日 星期二 

断开！

------------------------------------


Log Entry : 16:24:45 2020年8月4日 星期二 

断开！

------------------------------------


Log Entry : 16:25:47 2020年8月4日 星期二 

断开！

------------------------------------


Log Entry : 16:26:48 2020年8月4日 星期二 

断开！

------------------------------------


Log Entry : 16:27:49 2020年8月4日 星期二 

断开！

------------------------------------


Log Entry : 16:28:50 2020年8月4日 星期二 

断开！

------------------------------------


Log Entry : 16:29:51 2020年8月4日 星期二 

断开！

------------------------------------


Log Entry : 15:56:51 2020年8月6日 星期四 

数据采集器1断开！

------------------------------------


Log Entry : 13:26:39 2020年8月7日 星期五 

数据采集器1断开！

------------------------------------


Log Entry : 13:29:15 2020年8月7日 星期五 

数据采集器1断开！

------------------------------------


Log Entry : 13:31:27 2020年8月7日 星期五 

数据采集器1断开！

------------------------------------


Log Entry : 13:33:44 2020年8月7日 星期五 

数据采集器1断开！

------------------------------------


Log Entry : 13:43:45 2020年8月7日 星期五 

数据采集器1断开！

------------------------------------


Log Entry : 13:45:45 2020年8月7日 星期五 

数据采集器1断开！

------------------------------------


Log Entry : 13:53:44 2020年8月7日 星期五 

数据采集器1断开！

------------------------------------


Log Entry : 14:03:37 2020年8月7日 星期五 

数据采集器1断开！

------------------------------------


Log Entry : 14:05:16 2020年8月7日 星期五 

数据采集器1断开！

------------------------------------


Log Entry : 14:31:05 2020年8月7日 星期五 

数据采集器1断开！

------------------------------------


Log Entry : 15:52:59 2020年8月7日 星期五 

数据采集器1断开！

------------------------------------


Log Entry : 16:00:25 2020年8月7日 星期五 

数据采集器1断开！

------------------------------------


Log Entry : 16:40:36 2020年8月7日 星期五 

数据采集器1断开！

------------------------------------


Log Entry : 09:36:16 2020年8月10日 星期一 

数据采集器1断开！

------------------------------------


Log Entry : 09:49:43 2020年8月10日 星期一 

数据采集器1断开！

------------------------------------


Log Entry : 10:05:36 2020年8月10日 星期一 

数据采集器1断开！

------------------------------------


Log Entry : 11:13:40 2020年8月10日 星期一 

数据采集器1断开！

------------------------------------


Log Entry : 11:17:39 2020年8月10日 星期一 

数据采集器1断开！

------------------------------------


Log Entry : 11:38:07 2020年8月10日 星期一 

数据采集器1断开！

------------------------------------


Log Entry : 13:21:22 2020年8月10日 星期一 

数据采集器1断开！

------------------------------------


Log Entry : 13:49:52 2020年8月10日 星期一 

数据采集器1断开！

------------------------------------


Log Entry : 16:36:53 2020年8月11日 星期二 

数据采集器1断开！

------------------------------------


Log Entry : 16:39:33 2020年8月11日 星期二 

数据采集器1断开！

------------------------------------


Log Entry : 16:40:58 2020年8月11日 星期二 

数据采集器1断开！

------------------------------------


Log Entry : 16:47:11 2020年8月11日 星期二 

数据采集器1断开！

------------------------------------


Log Entry : 16:48:55 2020年8月11日 星期二 

数据采集器1断开！

------------------------------------


Log Entry : 16:57:53 2020年8月11日 星期二 

数据采集器1断开！

------------------------------------


Log Entry : 11:05:36 2020年8月12日 星期三 

数据采集器1断开！

------------------------------------


Log Entry : 11:05:36 2020年8月12日 星期三 

数据采集器1断开！

------------------------------------


Log Entry : 11:07:20 2020年8月12日 星期三 

数据采集器1断开！

------------------------------------


Log Entry : 11:09:20 2020年8月12日 星期三 

数据采集器1断开！

------------------------------------


Log Entry : 11:10:28 2020年8月12日 星期三 

数据采集器1断开！

------------------------------------


Log Entry : 11:10:28 2020年8月12日 星期三 

数据采集器1断开！

------------------------------------


Log Entry : 13:36:46 2020年8月12日 星期三 

数据采集器1断开！

------------------------------------


Log Entry : 13:36:46 2020年8月12日 星期三 

数据采集器1断开！

------------------------------------


Log Entry : 10:41:01 2020年8月14日 星期五 

数据采集器1断开！

------------------------------------


Log Entry : 15:34:12 2020年8月14日 星期五 

数据采集器1断开！

------------------------------------


Log Entry : 15:38:03 2020年8月14日 星期五 

数据采集器1断开！

------------------------------------


Log Entry : 15:38:03 2020年8月14日 星期五 

数据采集器1断开！

------------------------------------


Log Entry : 15:40:10 2020年8月14日 星期五 

断开！

------------------------------------


Log Entry : 13:36:37 2020年8月17日 星期一 

断开！

------------------------------------


Log Entry : 13:39:50 2020年8月17日 星期一 

断开！

------------------------------------


Log Entry : 13:40:50 2020年8月17日 星期一 

断开！

------------------------------------


Log Entry : 13:40:53 2020年8月17日 星期一 

断开！

------------------------------------


Log Entry : 13:41:01 2020年8月17日 星期一 

断开！

------------------------------------


Log Entry : 13:41:03 2020年8月17日 星期一 

断开！

------------------------------------


Log Entry : 13:41:13 2020年8月17日 星期一 

断开！

------------------------------------


Log Entry : 10:08:30 2020年8月18日 星期二 

断开！

------------------------------------


Log Entry : 10:33:31 2020年8月18日 星期二 

断开！

------------------------------------


Log Entry : 10:34:33 2020年8月18日 星期二 

断开！

------------------------------------


Log Entry : 10:35:37 2020年8月18日 星期二 

断开！

------------------------------------


Log Entry : 10:38:25 2020年8月18日 星期二 

断开！

------------------------------------


Log Entry : 10:46:56 2020年8月18日 星期二 

断开！

------------------------------------


Log Entry : 10:47:59 2020年8月18日 星期二 

断开！

------------------------------------


Log Entry : 10:55:03 2020年8月18日 星期二 

断开！

------------------------------------


Log Entry : 11:19:56 2020年8月18日 星期二 

断开！

------------------------------------


Log Entry : 11:31:36 2020年8月18日 星期二 

断开！

------------------------------------


Log Entry : 13:34:51 2020年8月18日 星期二 

断开！

------------------------------------


Log Entry : 13:35:54 2020年8月18日 星期二 

断开！

------------------------------------


Log Entry : 13:37:37 2020年8月18日 星期二 

断开！

------------------------------------


Log Entry : 13:39:06 2020年8月18日 星期二 

断开！

------------------------------------


Log Entry : 13:40:08 2020年8月18日 星期二 

断开！

------------------------------------


Log Entry : 13:44:25 2020年8月18日 星期二 

断开！

------------------------------------


Log Entry : 13:45:28 2020年8月18日 星期二 

断开！

------------------------------------


Log Entry : 13:46:30 2020年8月18日 星期二 

断开！

------------------------------------


Log Entry : 13:47:34 2020年8月18日 星期二 

断开！

------------------------------------


Log Entry : 13:48:40 2020年8月18日 星期二 

断开！

------------------------------------


Log Entry : 13:49:43 2020年8月18日 星期二 

断开！

------------------------------------


Log Entry : 13:50:46 2020年8月18日 星期二 

断开！

------------------------------------


Log Entry : 13:52:52 2020年8月18日 星期二 

断开！

------------------------------------


Log Entry : 13:53:54 2020年8月18日 星期二 

断开！

------------------------------------


Log Entry : 13:54:56 2020年8月18日 星期二 

断开！

------------------------------------


Log Entry : 13:57:15 2020年8月18日 星期二 

断开！

------------------------------------


Log Entry : 14:14:42 2020年8月18日 星期二 

断开！

------------------------------------


Log Entry : 14:15:45 2020年8月18日 星期二 

断开！

------------------------------------


Log Entry : 14:39:35 2020年8月18日 星期二 

断开！

------------------------------------


Log Entry : 14:40:39 2020年8月18日 星期二 

断开！

------------------------------------


Log Entry : 14:41:43 2020年8月18日 星期二 

断开！

------------------------------------


Log Entry : 14:42:46 2020年8月18日 星期二 

断开！

------------------------------------


Log Entry : 14:43:49 2020年8月18日 星期二 

断开！

------------------------------------


Log Entry : 14:46:32 2020年8月18日 星期二 

断开！

------------------------------------


Log Entry : 14:47:35 2020年8月18日 星期二 

断开！

------------------------------------


Log Entry : 14:49:33 2020年8月18日 星期二 

断开！

------------------------------------


Log Entry : 14:50:36 2020年8月18日 星期二 

断开！

------------------------------------


Log Entry : 14:51:28 2020年8月18日 星期二 

断开！

------------------------------------


Log Entry : 10:26:13 2020年8月20日 星期四 

数据采集器1断开！

------------------------------------


Log Entry : 10:27:29 2020年8月20日 星期四 

数据采集器1断开！

------------------------------------


Log Entry : 10:31:05 2020年8月20日 星期四 

数据采集器1断开！

------------------------------------


Log Entry : 14:36:48 2020年9月11日 星期五 

断开！

------------------------------------


Log Entry : 16:09:32 2020年9月18日 星期五 

断开！

------------------------------------


Log Entry : 16:10:34 2020年9月18日 星期五 

断开！

------------------------------------


Log Entry : 16:11:36 2020年9月18日 星期五 

断开！

------------------------------------


Log Entry : 16:12:39 2020年9月18日 星期五 

断开！

------------------------------------


Log Entry : 16:13:41 2020年9月18日 星期五 

断开！

------------------------------------


Log Entry : 16:14:44 2020年9月18日 星期五 

断开！

------------------------------------


Log Entry : 16:15:46 2020年9月18日 星期五 

断开！

------------------------------------


Log Entry : 16:16:53 2020年9月18日 星期五 

断开！

------------------------------------


Log Entry : 16:17:56 2020年9月18日 星期五 

断开！

------------------------------------


Log Entry : 16:18:58 2020年9月18日 星期五 

断开！

------------------------------------


Log Entry : 16:20:00 2020年9月18日 星期五 

断开！

------------------------------------


Log Entry : 16:21:03 2020年9月18日 星期五 

断开！

------------------------------------


Log Entry : 16:22:05 2020年9月18日 星期五 

断开！

------------------------------------


Log Entry : 16:23:07 2020年9月18日 星期五 

断开！

------------------------------------


Log Entry : 16:24:10 2020年9月18日 星期五 

断开！

------------------------------------


Log Entry : 16:25:12 2020年9月18日 星期五 

断开！

------------------------------------


Log Entry : 16:26:15 2020年9月18日 星期五 

断开！

------------------------------------


Log Entry : 16:27:17 2020年9月18日 星期五 

断开！

------------------------------------


Log Entry : 16:28:19 2020年9月18日 星期五 

断开！

------------------------------------


Log Entry : 16:29:22 2020年9月18日 星期五 

断开！

------------------------------------


Log Entry : 16:30:24 2020年9月18日 星期五 

断开！

------------------------------------


Log Entry : 16:31:26 2020年9月18日 星期五 

断开！

------------------------------------


Log Entry : 16:32:29 2020年9月18日 星期五 

断开！

------------------------------------


Log Entry : 16:33:31 2020年9月18日 星期五 

断开！

------------------------------------


Log Entry : 16:34:33 2020年9月18日 星期五 

断开！

------------------------------------


Log Entry : 16:35:36 2020年9月18日 星期五 

断开！

------------------------------------


Log Entry : 16:36:38 2020年9月18日 星期五 

断开！

------------------------------------


Log Entry : 16:37:40 2020年9月18日 星期五 

断开！

------------------------------------


Log Entry : 14:07:17 2020年9月21日 星期一 

断开！

------------------------------------


Log Entry : 14:07:41 2020年9月21日 星期一 

断开！

------------------------------------


Log Entry : 15:41:45 2020年9月21日 星期一 

断开！

------------------------------------


Log Entry : 11:04:20 2020年9月24日 星期四 

断开！

------------------------------------


Log Entry : 11:25:54 2020年9月24日 星期四 

断开！

------------------------------------


Log Entry : 11:35:19 2020年9月24日 星期四 

断开！

------------------------------------


Log Entry : 14:08:14 2020年9月24日 星期四 

断开！

------------------------------------


Log Entry : 14:18:41 2020年9月24日 星期四 

断开！

------------------------------------


Log Entry : 14:18:47 2020年9月24日 星期四 

断开！

------------------------------------


Log Entry : 14:25:25 2020年9月24日 星期四 

断开！

------------------------------------


Log Entry : 14:26:22 2020年9月24日 星期四 

断开！

------------------------------------


Log Entry : 14:26:29 2020年9月24日 星期四 

断开！

------------------------------------


Log Entry : 16:41:07 2020年9月24日 星期四 

次接驳盒断开！

------------------------------------


Log Entry : 16:41:07 2020年9月24日 星期四 

次接驳盒断开！

------------------------------------


Log Entry : 16:41:27 2020年9月24日 星期四 

次接驳盒断开！

------------------------------------


Log Entry : 16:41:27 2020年9月24日 星期四 

次接驳盒断开！

------------------------------------


Log Entry : 16:41:32 2020年9月24日 星期四 

次接驳盒断开！

------------------------------------


Log Entry : 16:41:32 2020年9月24日 星期四 

次接驳盒断开！

------------------------------------


Log Entry : 16:41:34 2020年9月24日 星期四 

次接驳盒断开！

------------------------------------


Log Entry : 16:41:34 2020年9月24日 星期四 

次接驳盒断开！

------------------------------------


Log Entry : 16:41:35 2020年9月24日 星期四 

次接驳盒断开！

------------------------------------


Log Entry : 16:41:35 2020年9月24日 星期四 

次接驳盒断开！

------------------------------------


Log Entry : 16:41:36 2020年9月24日 星期四 

次接驳盒断开！

------------------------------------


Log Entry : 16:41:36 2020年9月24日 星期四 

次接驳盒断开！

------------------------------------


Log Entry : 16:42:37 2020年9月24日 星期四 

次接驳盒断开！

------------------------------------


Log Entry : 16:45:02 2020年9月24日 星期四 

次接驳盒断开！

------------------------------------


Log Entry : 16:45:02 2020年9月24日 星期四 

次接驳盒断开！

------------------------------------


Log Entry : 16:45:03 2020年9月24日 星期四 

次接驳盒断开！

------------------------------------


Log Entry : 16:45:03 2020年9月24日 星期四 

次接驳盒断开！

------------------------------------


Log Entry : 16:45:04 2020年9月24日 星期四 

次接驳盒断开！

------------------------------------


Log Entry : 16:45:04 2020年9月24日 星期四 

次接驳盒断开！

------------------------------------


Log Entry : 16:45:05 2020年9月24日 星期四 

次接驳盒断开！

------------------------------------


Log Entry : 16:45:05 2020年9月24日 星期四 

次接驳盒断开！

------------------------------------


Log Entry : 16:45:06 2020年9月24日 星期四 

次接驳盒断开！

------------------------------------


Log Entry : 16:45:06 2020年9月24日 星期四 

次接驳盒断开！

------------------------------------


Log Entry : 16:45:07 2020年9月24日 星期四 

次接驳盒断开！

------------------------------------


Log Entry : 16:45:07 2020年9月24日 星期四 

次接驳盒断开！

------------------------------------


Log Entry : 16:46:07 2020年9月24日 星期四 

次接驳盒断开！

------------------------------------


Log Entry : 09:34:41 2020年9月25日 星期五 

主接驳盒断开！

------------------------------------


Log Entry : 09:35:01 2020年9月25日 星期五 

次接驳盒断开！

------------------------------------


Log Entry : 09:35:34 2020年9月25日 星期五 

次接驳盒断开！

------------------------------------


Log Entry : 09:35:34 2020年9月25日 星期五 

次接驳盒断开！

------------------------------------


Log Entry : 09:35:43 2020年9月25日 星期五 

主接驳盒断开！

------------------------------------


Log Entry : 09:36:36 2020年9月25日 星期五 

次接驳盒断开！

------------------------------------


Log Entry : 09:36:46 2020年9月25日 星期五 

主接驳盒断开！

------------------------------------


Log Entry : 09:43:38 2020年9月25日 星期五 

主接驳盒断开！

------------------------------------


Log Entry : 09:43:48 2020年9月25日 星期五 

次接驳盒断开！

------------------------------------


Log Entry : 09:44:40 2020年9月25日 星期五 

主接驳盒断开！

------------------------------------


Log Entry : 09:45:08 2020年9月25日 星期五 

次接驳盒断开！

------------------------------------


Log Entry : 10:01:01 2020年9月25日 星期五 

次接驳盒断开！

------------------------------------


Log Entry : 10:01:07 2020年9月25日 星期五 

次接驳盒断开！

------------------------------------


Log Entry : 10:02:20 2020年9月25日 星期五 

次接驳盒断开！

------------------------------------


Log Entry : 10:02:29 2020年9月25日 星期五 

次接驳盒断开！

------------------------------------


Log Entry : 10:02:44 2020年9月25日 星期五 

次接驳盒断开！

------------------------------------


Log Entry : 10:04:01 2020年9月25日 星期五 

次接驳盒断开！

------------------------------------


Log Entry : 10:04:01 2020年9月25日 星期五 

次接驳盒断开！

------------------------------------


Log Entry : 10:04:05 2020年9月25日 星期五 

主接驳盒断开！

------------------------------------


Log Entry : 10:05:04 2020年9月25日 星期五 

次接驳盒断开！

------------------------------------


Log Entry : 10:06:05 2020年9月25日 星期五 

次接驳盒断开！

------------------------------------


Log Entry : 10:06:53 2020年9月25日 星期五 

主接驳盒断开！

------------------------------------


Log Entry : 10:07:05 2020年9月25日 星期五 

次接驳盒断开！

------------------------------------


Log Entry : 10:08:06 2020年9月25日 星期五 

次接驳盒断开！

------------------------------------


Log Entry : 10:24:11 2020年9月25日 星期五 

数据采集器1断开！

------------------------------------


Log Entry : 10:26:26 2020年9月25日 星期五 

数据采集器1断开！

------------------------------------


Log Entry : 10:28:05 2020年9月25日 星期五 

次接驳盒断开！

------------------------------------


Log Entry : 10:28:05 2020年9月25日 星期五 

次接驳盒断开！

------------------------------------


Log Entry : 10:28:33 2020年9月25日 星期五 

主接驳盒断开！

------------------------------------


Log Entry : 10:29:08 2020年9月25日 星期五 

次接驳盒断开！

------------------------------------


Log Entry : 10:29:35 2020年9月25日 星期五 

主接驳盒断开！

------------------------------------


Log Entry : 10:30:26 2020年9月25日 星期五 

次接驳盒断开！

------------------------------------


Log Entry : 10:31:27 2020年9月25日 星期五 

次接驳盒断开！

------------------------------------


Log Entry : 10:32:27 2020年9月25日 星期五 

次接驳盒断开！

------------------------------------


Log Entry : 10:33:28 2020年9月25日 星期五 

次接驳盒断开！

------------------------------------


Log Entry : 10:34:02 2020年9月25日 星期五 

主接驳盒断开！

------------------------------------


Log Entry : 13:16:18 2020年9月29日 星期二 

次接驳盒断开！

------------------------------------


Log Entry : 13:21:16 2020年9月29日 星期二 

次接驳盒断开！

------------------------------------


Log Entry : 16:08:29 2020年10月6日 星期二 

次接驳盒断开！

------------------------------------


Log Entry : 16:08:29 2020年10月6日 星期二 

次接驳盒断开！

------------------------------------


Log Entry : 16:08:31 2020年10月6日 星期二 

次接驳盒断开！

------------------------------------


Log Entry : 16:08:31 2020年10月6日 星期二 

次接驳盒断开！

------------------------------------


Log Entry : 16:09:33 2020年10月6日 星期二 

次接驳盒断开！

------------------------------------


Log Entry : 16:11:12 2020年10月6日 星期二 

次接驳盒断开！

------------------------------------


Log Entry : 15:49:28 2020年10月7日 星期三 

主接驳盒断开！

------------------------------------


Log Entry : 15:50:30 2020年10月7日 星期三 

主接驳盒断开！

------------------------------------


Log Entry : 15:51:32 2020年10月7日 星期三 

主接驳盒断开！

------------------------------------


Log Entry : 15:52:35 2020年10月7日 星期三 

主接驳盒断开！

------------------------------------


Log Entry : 15:53:37 2020年10月7日 星期三 

主接驳盒断开！

------------------------------------


Log Entry : 16:10:06 2020年10月7日 星期三 

次接驳盒断开！

------------------------------------


Log Entry : 16:10:07 2020年10月7日 星期三 

主接驳盒断开！

------------------------------------


Log Entry : 16:11:08 2020年10月7日 星期三 

次接驳盒断开！

------------------------------------


Log Entry : 16:11:10 2020年10月7日 星期三 

主接驳盒断开！

------------------------------------


Log Entry : 16:12:12 2020年10月7日 星期三 

主接驳盒断开！

------------------------------------


Log Entry : 16:12:12 2020年10月7日 星期三 

次接驳盒断开！

------------------------------------


Log Entry : 16:13:14 2020年10月7日 星期三 

主接驳盒断开！

------------------------------------


Log Entry : 16:13:16 2020年10月7日 星期三 

次接驳盒断开！

------------------------------------


Log Entry : 16:14:17 2020年10月7日 星期三 

主接驳盒断开！

------------------------------------


Log Entry : 16:14:19 2020年10月7日 星期三 

次接驳盒断开！

------------------------------------


Log Entry : 16:15:19 2020年10月7日 星期三 

主接驳盒断开！

------------------------------------


Log Entry : 16:15:22 2020年10月7日 星期三 

次接驳盒断开！

------------------------------------


Log Entry : 16:16:21 2020年10月7日 星期三 

主接驳盒断开！

------------------------------------


Log Entry : 16:16:25 2020年10月7日 星期三 

次接驳盒断开！

------------------------------------


Log Entry : 16:17:24 2020年10月7日 星期三 

主接驳盒断开！

------------------------------------


Log Entry : 16:17:27 2020年10月7日 星期三 

次接驳盒断开！

------------------------------------


Log Entry : 16:18:26 2020年10月7日 星期三 

主接驳盒断开！

------------------------------------


Log Entry : 16:18:30 2020年10月7日 星期三 

次接驳盒断开！

------------------------------------


Log Entry : 16:19:28 2020年10月7日 星期三 

主接驳盒断开！

------------------------------------


Log Entry : 16:19:32 2020年10月7日 星期三 

次接驳盒断开！

------------------------------------


Log Entry : 16:20:31 2020年10月7日 星期三 

主接驳盒断开！

------------------------------------


Log Entry : 16:20:35 2020年10月7日 星期三 

次接驳盒断开！

------------------------------------


Log Entry : 16:21:33 2020年10月7日 星期三 

主接驳盒断开！

------------------------------------


Log Entry : 16:21:37 2020年10月7日 星期三 

次接驳盒断开！

------------------------------------


Log Entry : 16:22:36 2020年10月7日 星期三 

主接驳盒断开！

------------------------------------


Log Entry : 16:22:39 2020年10月7日 星期三 

次接驳盒断开！

------------------------------------


Log Entry : 16:23:38 2020年10月7日 星期三 

主接驳盒断开！

------------------------------------


Log Entry : 16:23:41 2020年10月7日 星期三 

次接驳盒断开！

------------------------------------


Log Entry : 16:24:40 2020年10月7日 星期三 

主接驳盒断开！

------------------------------------


Log Entry : 16:24:43 2020年10月7日 星期三 

次接驳盒断开！

------------------------------------


Log Entry : 16:25:43 2020年10月7日 星期三 

主接驳盒断开！

------------------------------------


Log Entry : 16:25:45 2020年10月7日 星期三 

次接驳盒断开！

------------------------------------


Log Entry : 16:26:45 2020年10月7日 星期三 

主接驳盒断开！

------------------------------------


Log Entry : 16:26:47 2020年10月7日 星期三 

次接驳盒断开！

------------------------------------


Log Entry : 16:27:47 2020年10月7日 星期三 

主接驳盒断开！

------------------------------------


Log Entry : 16:27:49 2020年10月7日 星期三 

次接驳盒断开！

------------------------------------


Log Entry : 16:28:50 2020年10月7日 星期三 

主接驳盒断开！

------------------------------------


Log Entry : 16:28:51 2020年10月7日 星期三 

次接驳盒断开！

------------------------------------


Log Entry : 16:29:52 2020年10月7日 星期三 

主接驳盒断开！

------------------------------------


Log Entry : 16:29:53 2020年10月7日 星期三 

次接驳盒断开！

------------------------------------


Log Entry : 16:30:54 2020年10月7日 星期三 

主接驳盒断开！

------------------------------------


Log Entry : 16:30:55 2020年10月7日 星期三 

次接驳盒断开！

------------------------------------


Log Entry : 16:31:57 2020年10月7日 星期三 

主接驳盒断开！

------------------------------------


Log Entry : 16:31:57 2020年10月7日 星期三 

次接驳盒断开！

------------------------------------


Log Entry : 16:32:59 2020年10月7日 星期三 

主接驳盒断开！

------------------------------------


Log Entry : 16:32:59 2020年10月7日 星期三 

次接驳盒断开！

------------------------------------


Log Entry : 16:34:01 2020年10月7日 星期三 

次接驳盒断开！

------------------------------------


Log Entry : 16:34:01 2020年10月7日 星期三 

主接驳盒断开！

------------------------------------


Log Entry : 16:35:03 2020年10月7日 星期三 

次接驳盒断开！

------------------------------------


Log Entry : 16:35:04 2020年10月7日 星期三 

主接驳盒断开！

------------------------------------


Log Entry : 16:36:05 2020年10月7日 星期三 

次接驳盒断开！

------------------------------------


Log Entry : 16:36:06 2020年10月7日 星期三 

主接驳盒断开！

------------------------------------


Log Entry : 16:37:08 2020年10月7日 星期三 

次接驳盒断开！

------------------------------------


Log Entry : 16:37:09 2020年10月7日 星期三 

主接驳盒断开！

------------------------------------


Log Entry : 16:38:10 2020年10月7日 星期三 

次接驳盒断开！

------------------------------------


Log Entry : 16:38:11 2020年10月7日 星期三 

主接驳盒断开！

------------------------------------


Log Entry : 16:39:12 2020年10月7日 星期三 

次接驳盒断开！

------------------------------------


Log Entry : 16:39:13 2020年10月7日 星期三 

主接驳盒断开！

------------------------------------


Log Entry : 16:40:14 2020年10月7日 星期三 

次接驳盒断开！

------------------------------------


Log Entry : 16:40:16 2020年10月7日 星期三 

主接驳盒断开！

------------------------------------


Log Entry : 16:41:16 2020年10月7日 星期三 

次接驳盒断开！

------------------------------------


Log Entry : 16:41:18 2020年10月7日 星期三 

主接驳盒断开！

------------------------------------


Log Entry : 16:42:18 2020年10月7日 星期三 

次接驳盒断开！

------------------------------------


Log Entry : 16:42:20 2020年10月7日 星期三 

主接驳盒断开！

------------------------------------


Log Entry : 16:43:20 2020年10月7日 星期三 

次接驳盒断开！

------------------------------------


Log Entry : 16:43:23 2020年10月7日 星期三 

主接驳盒断开！

------------------------------------


Log Entry : 16:44:22 2020年10月7日 星期三 

次接驳盒断开！

------------------------------------


Log Entry : 16:44:25 2020年10月7日 星期三 

主接驳盒断开！

------------------------------------


Log Entry : 16:45:24 2020年10月7日 星期三 

次接驳盒断开！

------------------------------------


Log Entry : 16:45:28 2020年10月7日 星期三 

主接驳盒断开！

------------------------------------


Log Entry : 16:46:26 2020年10月7日 星期三 

次接驳盒断开！

------------------------------------


Log Entry : 16:46:30 2020年10月7日 星期三 

主接驳盒断开！

------------------------------------


Log Entry : 16:47:28 2020年10月7日 星期三 

次接驳盒断开！

------------------------------------


Log Entry : 16:47:32 2020年10月7日 星期三 

主接驳盒断开！

------------------------------------


Log Entry : 16:48:30 2020年10月7日 星期三 

次接驳盒断开！

------------------------------------


Log Entry : 16:48:35 2020年10月7日 星期三 

主接驳盒断开！

------------------------------------


Log Entry : 16:49:33 2020年10月7日 星期三 

次接驳盒断开！

------------------------------------


Log Entry : 16:49:37 2020年10月7日 星期三 

主接驳盒断开！

------------------------------------


Log Entry : 16:50:34 2020年10月7日 星期三 

次接驳盒断开！

------------------------------------


Log Entry : 16:50:39 2020年10月7日 星期三 

主接驳盒断开！

------------------------------------


Log Entry : 16:51:37 2020年10月7日 星期三 

次接驳盒断开！

------------------------------------


Log Entry : 16:51:42 2020年10月7日 星期三 

主接驳盒断开！

------------------------------------


Log Entry : 16:52:39 2020年10月7日 星期三 

次接驳盒断开！

------------------------------------


Log Entry : 16:52:44 2020年10月7日 星期三 

主接驳盒断开！

------------------------------------


Log Entry : 16:53:41 2020年10月7日 星期三 

次接驳盒断开！

------------------------------------


Log Entry : 16:53:46 2020年10月7日 星期三 

主接驳盒断开！

------------------------------------


Log Entry : 09:08:10 2020年10月8日 星期四 

次接驳盒断开！

------------------------------------


Log Entry : 09:08:11 2020年10月8日 星期四 

主接驳盒断开！

------------------------------------


Log Entry : 09:19:40 2020年10月8日 星期四 

次接驳盒断开！

------------------------------------


Log Entry : 10:00:37 2020年10月8日 星期四 

数据采集器1断开！

------------------------------------


Log Entry : 10:01:46 2020年10月8日 星期四 

数据采集器1断开！

------------------------------------


Log Entry : 10:05:12 2020年10月8日 星期四 

次接驳盒断开！

------------------------------------


Log Entry : 10:05:37 2020年10月8日 星期四 

主接驳盒断开！

------------------------------------


Log Entry : 15:33:51 2020年10月19日 星期一 

次接驳盒断开！

------------------------------------


Log Entry : 15:37:15 2020年10月19日 星期一 

次接驳盒断开！

------------------------------------


Log Entry : 16:05:00 2020年10月19日 星期一 

次接驳盒断开！

------------------------------------


Log Entry : 09:17:49 2020年10月20日 星期二 

次接驳盒断开！

------------------------------------


Log Entry : 09:19:09 2020年10月20日 星期二 

次接驳盒断开！

------------------------------------


Log Entry : 09:22:09 2020年10月20日 星期二 

次接驳盒断开！

------------------------------------


Log Entry : 11:31:12 2020年10月21日 星期三 

次接驳盒断开！

------------------------------------


Log Entry : 13:08:42 2020年10月21日 星期三 

次接驳盒断开！

------------------------------------


Log Entry : 13:09:53 2020年10月21日 星期三 

次接驳盒断开！

------------------------------------


Log Entry : 14:31:23 2020年11月5日 星期四 

数据采集器1断开！

------------------------------------


Log Entry : 14:33:03 2020年11月5日 星期四 

数据采集器1断开！

------------------------------------


Log Entry : 14:48:17 2020年11月5日 星期四 

数据采集器1断开！

------------------------------------


Log Entry : 15:22:19 2020年11月5日 星期四 

数据采集器1断开！

------------------------------------


Log Entry : 15:23:56 2020年11月5日 星期四 

数据采集器1断开！

------------------------------------


Log Entry : 15:25:51 2020年11月5日 星期四 

数据采集器1断开！

------------------------------------


Log Entry : 15:25:53 2020年11月5日 星期四 

数据采集器1断开！

------------------------------------


Log Entry : 15:25:58 2020年11月5日 星期四 

数据采集器1断开！

------------------------------------


Log Entry : 15:26:30 2020年11月5日 星期四 

数据采集器1断开！

------------------------------------


Log Entry : 15:26:46 2020年11月5日 星期四 

数据采集器1断开！

------------------------------------


Log Entry : 15:26:53 2020年11月5日 星期四 

数据采集器1断开！

------------------------------------


Log Entry : 15:27:01 2020年11月5日 星期四 

数据采集器1断开！

------------------------------------


Log Entry : 15:27:46 2020年11月5日 星期四 

数据采集器1断开！

------------------------------------


Log Entry : 15:29:26 2020年11月5日 星期四 

数据采集器1断开！

------------------------------------


Log Entry : 15:29:37 2020年11月5日 星期四 

数据采集器1断开！

------------------------------------


Log Entry : 15:40:47 2020年11月5日 星期四 

数据采集器1断开！

------------------------------------


Log Entry : 15:43:10 2020年11月5日 星期四 

数据采集器1断开！

------------------------------------


Log Entry : 15:49:24 2020年11月5日 星期四 

数据采集器1断开！

------------------------------------


Log Entry : 15:51:46 2020年11月5日 星期四 

数据采集器1断开！

------------------------------------


Log Entry : 15:53:42 2020年11月5日 星期四 

数据采集器1断开！

------------------------------------


Log Entry : 15:55:20 2020年11月5日 星期四 

数据采集器1断开！

------------------------------------


Log Entry : 15:56:56 2020年11月5日 星期四 

数据采集器1断开！

------------------------------------


Log Entry : 16:09:09 2020年11月5日 星期四 

数据采集器1断开！

------------------------------------


Log Entry : 16:18:51 2020年11月5日 星期四 

数据采集器1断开！

------------------------------------


Log Entry : 16:26:13 2020年11月5日 星期四 

数据采集器1断开！

------------------------------------


Log Entry : 16:28:03 2020年11月5日 星期四 

数据采集器1断开！

------------------------------------


Log Entry : 16:29:23 2020年11月5日 星期四 

数据采集器1断开！

------------------------------------


Log Entry : 16:30:55 2020年11月5日 星期四 

数据采集器1断开！

------------------------------------


Log Entry : 16:38:57 2020年11月5日 星期四 

数据采集器1断开！

------------------------------------


Log Entry : 16:40:47 2020年11月5日 星期四 

数据采集器1断开！

------------------------------------


Log Entry : 10:56:05 2020年11月6日 星期五 

数据采集器1断开！

------------------------------------


Log Entry : 11:02:19 2020年11月6日 星期五 

数据采集器1断开！

------------------------------------


Log Entry : 16:17:20 2020年11月6日 星期五 

次接驳盒断开！

------------------------------------


Log Entry : 16:45:33 2020年11月6日 星期五 

次接驳盒断开！

------------------------------------


Log Entry : 16:47:18 2020年11月6日 星期五 

次接驳盒断开！

------------------------------------


Log Entry : 09:59:54 2020年11月9日 星期一 

次接驳盒断开！

------------------------------------


Log Entry : 10:57:45 2020年11月9日 星期一 

次接驳盒断开！

------------------------------------


Log Entry : 11:00:13 2020年11月9日 星期一 

次接驳盒断开！

------------------------------------


Log Entry : 11:08:44 2020年11月9日 星期一 

次接驳盒断开！

------------------------------------


Log Entry : 11:12:22 2020年11月9日 星期一 

次接驳盒断开！

------------------------------------


Log Entry : 13:24:18 2020年11月9日 星期一 

次接驳盒断开！

------------------------------------


Log Entry : 13:37:00 2020年11月9日 星期一 

次接驳盒断开！

------------------------------------


Log Entry : 09:26:07 2020年11月10日 星期二 

次接驳盒断开！

------------------------------------


Log Entry : 09:26:11 2020年11月10日 星期二 

次接驳盒断开！

------------------------------------


Log Entry : 11:06:17 2020年11月10日 星期二 

数据采集器1断开！

------------------------------------


Log Entry : 10:27:14 2020年11月13日 星期五 

次接驳盒断开！

------------------------------------


Log Entry : 11:10:22 2020年11月13日 星期五 

次接驳盒断开！

------------------------------------


Log Entry : 11:21:52 2020年11月13日 星期五 

次接驳盒断开！

------------------------------------


Log Entry : 09:22:07 2020年12月24日 星期四 

数据采集器1断开！

------------------------------------


Log Entry : 09:27:00 2020年12月24日 星期四 

数据采集器1断开！

------------------------------------


Log Entry : 15:49:08 2020年12月24日 星期四 

数据采集器1断开！

------------------------------------


Log Entry : 10:38:18 2020年12月25日 星期五 

数据采集器1断开！

------------------------------------


Log Entry : 11:20:49 2020年12月25日 星期五 

数据采集器1断开！

------------------------------------


Log Entry : 14:29:48 2020年12月25日 星期五 

数据采集器1断开！

------------------------------------


Log Entry : 15:13:53 2020年12月25日 星期五 

数据采集器1断开！

------------------------------------


Log Entry : 15:16:24 2020年12月25日 星期五 

数据采集器1断开！

------------------------------------


Log Entry : 16:33:52 2020年12月25日 星期五 

数据采集器1断开！

------------------------------------


Log Entry : 14:52:50 2020年12月29日 星期二 

数据采集器1断开！

------------------------------------


Log Entry : 16:07:05 2020年12月29日 星期二 

数据采集器1断开！

------------------------------------


Log Entry : 10:20:03 2020年12月30日 星期三 

数据采集器1断开！

------------------------------------


Log Entry : 10:27:18 2020年12月30日 星期三 

数据采集器1断开！

------------------------------------


Log Entry : 10:47:43 2020年12月30日 星期三 

数据采集器1断开！

------------------------------------


Log Entry : 11:24:14 2020年12月30日 星期三 

数据采集器1断开！

------------------------------------


Log Entry : 11:32:38 2020年12月30日 星期三 

数据采集器1断开！

------------------------------------


Log Entry : 12:00:57 2020年12月30日 星期三 

数据采集器1断开！

------------------------------------


Log Entry : 13:28:36 2020年12月30日 星期三 

数据采集器1断开！

------------------------------------


Log Entry : 13:38:02 2020年12月30日 星期三 

数据采集器1断开！

------------------------------------


Log Entry : 13:39:42 2020年12月30日 星期三 

数据采集器1断开！

------------------------------------


Log Entry : 13:48:17 2020年12月30日 星期三 

数据采集器1断开！

------------------------------------


Log Entry : 13:49:49 2020年12月30日 星期三 

数据采集器1断开！

------------------------------------


Log Entry : 13:51:31 2020年12月30日 星期三 

数据采集器1断开！

------------------------------------


Log Entry : 13:57:06 2020年12月30日 星期三 

数据采集器1断开！

------------------------------------


Log Entry : 11:11:33 2021年1月14日 星期四 

次接驳盒断开！

------------------------------------


Log Entry : 11:23:33 2021年1月14日 星期四 

主接驳盒断开！

------------------------------------


Log Entry : 11:13:09 2021年1月25日 星期一 

主接驳盒断开！

------------------------------------


Log Entry : 11:26:27 2021年1月25日 星期一 

次接驳盒断开！

------------------------------------


Log Entry : 11:27:56 2021年1月25日 星期一 

主接驳盒断开！

------------------------------------


Log Entry : 13:58:38 2021年1月25日 星期一 

次接驳盒断开！

------------------------------------


Log Entry : 17:05:48 2021年1月25日 星期一 

次接驳盒断开！

------------------------------------


Log Entry : 17:05:48 2021年1月25日 星期一 

次接驳盒断开！

------------------------------------


Log Entry : 14:54:45 2021年2月2日 星期二 

次接驳盒断开！

------------------------------------


Log Entry : 14:56:26 2021年2月2日 星期二 

次接驳盒断开！

------------------------------------


Log Entry : 13:45:43 2021年2月4日 星期四 

次接驳盒断开！

------------------------------------


Log Entry : 13:47:44 2021年2月4日 星期四 

次接驳盒断开！

------------------------------------


Log Entry : 10:33:26 2021年2月22日 星期一 

次接驳盒断开！

------------------------------------


Log Entry : 10:42:14 2021年2月22日 星期一 

次接驳盒断开！

------------------------------------


Log Entry : 10:51:18 2021年2月22日 星期一 

次接驳盒断开！

------------------------------------


Log Entry : 10:56:10 2021年2月22日 星期一 

次接驳盒断开！

------------------------------------


Log Entry : 10:58:52 2021年2月22日 星期一 

次接驳盒断开！

------------------------------------


Log Entry : 11:02:57 2021年2月22日 星期一 

次接驳盒断开！

------------------------------------


Log Entry : 13:58:32 2021年2月22日 星期一 

次接驳盒断开！

------------------------------------


Log Entry : 15:28:55 2021年2月22日 星期一 

次接驳盒断开！

------------------------------------


Log Entry : 16:05:06 2021年2月22日 星期一 

次接驳盒断开！

------------------------------------


Log Entry : 09:24:19 2021年2月23日 星期二 

次接驳盒断开！

------------------------------------


Log Entry : 09:24:19 2021年2月23日 星期二 

次接驳盒断开！

------------------------------------


Log Entry : 10:01:39 2021年2月23日 星期二 

次接驳盒断开！

------------------------------------


Log Entry : 10:19:03 2021年2月23日 星期二 

次接驳盒断开！

------------------------------------


Log Entry : 10:24:27 2021年2月23日 星期二 

次接驳盒断开！

------------------------------------


Log Entry : 10:56:52 2021年2月23日 星期二 

次接驳盒断开！

------------------------------------


Log Entry : 14:32:32 2021年2月23日 星期二 

次接驳盒断开！

------------------------------------


Log Entry : 15:54:30 2021年2月23日 星期二 

次接驳盒断开！

------------------------------------


Log Entry : 16:24:30 2021年2月23日 星期二 

次接驳盒断开！

------------------------------------


Log Entry : 16:26:24 2021年2月23日 星期二 

次接驳盒断开！

------------------------------------


Log Entry : 09:25:15 2021年2月24日 星期三 

次接驳盒断开！

------------------------------------


Log Entry : 09:38:50 2021年2月24日 星期三 

次接驳盒断开！

------------------------------------


Log Entry : 09:40:39 2021年2月24日 星期三 

次接驳盒断开！

------------------------------------


Log Entry : 09:45:20 2021年2月24日 星期三 

次接驳盒断开！

------------------------------------


Log Entry : 09:46:48 2021年2月24日 星期三 

次接驳盒断开！

------------------------------------


Log Entry : 09:50:45 2021年2月24日 星期三 

次接驳盒断开！

------------------------------------


Log Entry : 09:52:36 2021年2月24日 星期三 

次接驳盒断开！

------------------------------------


Log Entry : 09:57:25 2021年2月24日 星期三 

次接驳盒断开！

------------------------------------


Log Entry : 09:59:35 2021年2月24日 星期三 

次接驳盒断开！

------------------------------------


Log Entry : 10:01:17 2021年2月24日 星期三 

次接驳盒断开！

------------------------------------


Log Entry : 10:01:17 2021年2月24日 星期三 

次接驳盒断开！

------------------------------------


Log Entry : 10:07:51 2021年2月24日 星期三 

主接驳盒断开！

------------------------------------


Log Entry : 10:13:54 2021年2月24日 星期三 

主接驳盒断开！

------------------------------------


Log Entry : 10:17:22 2021年2月24日 星期三 

主接驳盒断开！

------------------------------------


Log Entry : 14:07:47 2021年2月24日 星期三 

主接驳盒断开！

------------------------------------


Log Entry : 14:09:12 2021年2月24日 星期三 

主接驳盒断开！

------------------------------------


Log Entry : 11:07:03 2021年2月25日 星期四 

次接驳盒断开！

------------------------------------


Log Entry : 11:21:58 2021年2月25日 星期四 

次接驳盒断开！

------------------------------------


Log Entry : 11:21:58 2021年2月25日 星期四 

次接驳盒断开！

------------------------------------


Log Entry : 11:21:58 2021年2月25日 星期四 

次接驳盒断开！

------------------------------------


Log Entry : 11:21:58 2021年2月25日 星期四 

次接驳盒断开！

------------------------------------


Log Entry : 11:24:26 2021年2月25日 星期四 

主接驳盒断开！

------------------------------------


Log Entry : 11:24:26 2021年2月25日 星期四 

次接驳盒断开！

------------------------------------


Log Entry : 11:24:29 2021年2月25日 星期四 

主接驳盒断开！

------------------------------------


Log Entry : 11:24:29 2021年2月25日 星期四 

次接驳盒断开！

------------------------------------


Log Entry : 11:25:38 2021年2月25日 星期四 

主接驳盒断开！

------------------------------------


Log Entry : 11:27:06 2021年2月25日 星期四 

主接驳盒断开！

------------------------------------


Log Entry : 11:27:58 2021年2月25日 星期四 

次接驳盒断开！

------------------------------------


Log Entry : 11:28:28 2021年2月25日 星期四 

主接驳盒断开！

------------------------------------


Log Entry : 11:29:30 2021年2月25日 星期四 

次接驳盒断开！

------------------------------------


Log Entry : 11:29:44 2021年2月25日 星期四 

次接驳盒断开！

------------------------------------


Log Entry : 11:30:10 2021年2月25日 星期四 

次接驳盒断开！

------------------------------------


Log Entry : 11:35:17 2021年2月25日 星期四 

次接驳盒断开！

------------------------------------


Log Entry : 11:35:24 2021年2月25日 星期四 

主接驳盒断开！

------------------------------------


Log Entry : 13:11:20 2021年2月25日 星期四 

主接驳盒断开！

------------------------------------


Log Entry : 13:11:22 2021年2月25日 星期四 

次接驳盒断开！

------------------------------------


Log Entry : 13:50:47 2021年2月25日 

次接驳盒断开！

------------------------------------


Log Entry : 13:55:46 2021年2月25日 

次接驳盒断开！

------------------------------------


Log Entry : 13:55:49 2021年2月25日 

次接驳盒断开！

------------------------------------


Log Entry : 14:19:22 2021年2月25日 

次接驳盒断开！

------------------------------------


Log Entry : 14:20:24 2021年2月25日 

主接驳盒断开！

------------------------------------


Log Entry : 14:21:26 2021年2月25日 

主接驳盒断开！

------------------------------------


Log Entry : 14:22:29 2021年2月25日 

主接驳盒断开！

------------------------------------


Log Entry : 14:23:31 2021年2月25日 

主接驳盒断开！

------------------------------------


Log Entry : 14:24:33 2021年2月25日 

主接驳盒断开！

------------------------------------


Log Entry : 14:25:36 2021年2月25日 

主接驳盒断开！

------------------------------------


Log Entry : 14:31:21 2021年2月25日 

主接驳盒断开！

------------------------------------


Log Entry : 14:32:23 2021年2月25日 

主接驳盒断开！

------------------------------------


Log Entry : 14:33:25 2021年2月25日 

主接驳盒断开！

------------------------------------


Log Entry : 14:34:28 2021年2月25日 

主接驳盒断开！

------------------------------------


Log Entry : 14:35:30 2021年2月25日 

主接驳盒断开！

------------------------------------


Log Entry : 15:00:16 2021年3月11日 

数据采集器1断开！短信发送情况IP限制

------------------------------------


Log Entry : 15:11:09 2021年3月11日 

数据采集器1断开！短信发送情况发送短信数量：1

------------------------------------


Log Entry : 15:25:47 2021年3月11日 

数据采集器1断开！短信发送情况值不能为 null。
参数名: String

------------------------------------


Log Entry : 16:30:47 2021年3月11日 

数据采集器1断开！短信发送情况发送短信数量：1

------------------------------------


Log Entry : 16:50:48 2021年3月11日 

数据采集器1断开！短信发送情况发送短信数量：1

------------------------------------


Log Entry : 9:57:46 2021年3月12日 

数据采集器1断开！短信发送情况值不能为 null。
参数名: String

------------------------------------


Log Entry : 10:01:42 2021年3月12日 

数据采集器1断开！短信发送情况发送短信数量：1

------------------------------------


Log Entry : 15:21:09 2021年4月12日 星期一 

数据采集器1断开！短信发送情况发送短信数量：1

------------------------------------


Log Entry : 15:27:49 2021年4月12日 星期一 

数据采集器1断开！短信发送情况发送短信数量：1

------------------------------------


Log Entry : 15:38:48 2021年4月12日 星期一 

数据采集器1断开！短信发送情况发送短信数量：1

------------------------------------


Log Entry : 15:38:49 2021年4月12日 星期一 

数据采集器1断开！短信发送情况发送短信数量：1

------------------------------------


Log Entry : 15:42:46 2021年4月12日 星期一 

数据采集器1断开！短信发送情况发送短信数量：1

------------------------------------


Log Entry : 16:34:46 2021年4月12日 星期一 

数据采集器1断开！短信发送情况发送短信数量：1

------------------------------------


Log Entry : 16:35:51 2021年4月12日 星期一 

数据采集器1断开！短信发送情况发送短信数量：1

------------------------------------


Log Entry : 16:39:50 2021年4月12日 星期一 

数据采集器1断开！短信发送情况发送短信数量：1

------------------------------------


Log Entry : 16:33:35 2021年4月13日 星期二 

数据采集器1断开！短信发送情况发送短信数量：1

------------------------------------


Log Entry : 16:24:09 2021年4月14日 星期三 

数据采集器1断开！短信发送情况发送短信数量：1

------------------------------------


Log Entry : 09:30:27 2021年4月15日 星期四 

数据采集器1断开！短信发送情况发送短信数量：1

------------------------------------


Log Entry : 09:34:03 2021年4月15日 星期四 

数据采集器1断开！短信发送情况发送短信数量：1

------------------------------------


Log Entry : 09:37:18 2021年4月15日 星期四 

数据采集器1断开！短信发送情况发送短信数量：1

------------------------------------


Log Entry : 09:41:31 2021年4月15日 星期四 

数据采集器1断开！短信发送情况发送短信数量：1

------------------------------------


Log Entry : 09:43:25 2021年4月15日 星期四 

数据采集器1断开！短信发送情况发送短信数量：1

------------------------------------


Log Entry : 09:59:47 2021年4月15日 星期四 

数据采集器1断开！短信发送情况发送短信数量：1

------------------------------------


Log Entry : 13:53:01 2021年4月15日 星期四 

数据采集器1断开！短信发送情况发送短信数量：1

------------------------------------


Log Entry : 13:55:51 2021年4月15日 星期四 

数据采集器1断开！短信发送情况发送短信数量：1

------------------------------------


Log Entry : 14:42:29 2021年4月15日 星期四 

数据采集器1断开！短信发送情况发送短信数量：1

------------------------------------


Log Entry : 15:02:10 2021年4月15日 星期四 

数据采集器1断开！短信发送情况发送短信数量：1

------------------------------------


Log Entry : 16:00:06 2021年4月15日 星期四 

数据采集器1断开！短信发送情况发送短信数量：1

------------------------------------


Log Entry : 10:43:05 2021年4月20日 星期二 

数据采集器1断开！短信发送情况发送短信数量：1

------------------------------------


Log Entry : 10:49:35 2021年4月20日 星期二 

数据采集器1断开！短信发送情况发送短信数量：1

------------------------------------


Log Entry : 11:02:43 2021年4月20日 星期二 

数据采集器1断开！短信发送情况发送短信数量：1

------------------------------------


Log Entry : 11:17:34 2021年4月20日 星期二 

数据采集器1断开！短信发送情况发送短信数量：1

------------------------------------


Log Entry : 13:20:12 2021年4月20日 星期二 

数据采集器1断开！短信发送情况发送短信数量：1

------------------------------------


Log Entry : 13:22:50 2021年4月20日 星期二 

数据采集器1断开！短信发送情况发送短信数量：1

------------------------------------


Log Entry : 13:37:56 2021年4月20日 星期二 

数据采集器1断开！短信发送情况发送短信数量：1

------------------------------------


Log Entry : 13:39:55 2021年4月20日 星期二 

数据采集器1断开！短信发送情况发送短信数量：1

------------------------------------


Log Entry : 13:44:42 2021年4月20日 星期二 

数据采集器1断开！短信发送情况发送短信数量：1

------------------------------------


Log Entry : 14:12:08 2021年4月20日 星期二 

数据采集器1断开！短信发送情况发送短信数量：1

------------------------------------


Log Entry : 14:13:39 2021年4月20日 星期二 

数据采集器1断开！短信发送情况发送短信数量：1

------------------------------------


Log Entry : 14:14:19 2021年4月20日 星期二 

数据采集器1断开！短信发送情况发送短信数量：1

------------------------------------


Log Entry : 14:15:31 2021年4月20日 星期二 

数据采集器1断开！短信发送情况发送短信数量：1

------------------------------------


Log Entry : 14:22:57 2021年4月20日 星期二 

数据采集器1断开！短信发送情况发送短信数量：1

------------------------------------


Log Entry : 14:23:20 2021年4月20日 星期二 

数据采集器1断开！短信发送情况发送短信数量：1

------------------------------------


Log Entry : 14:28:51 2021年4月20日 星期二 

数据采集器1断开！短信发送情况发送短信数量：1

------------------------------------


Log Entry : 15:23:52 2021年4月20日 星期二 

主接驳盒断开！短信发送情况：发送短信数量：1

------------------------------------


Log Entry : 15:26:17 2021年4月20日 星期二 

主接驳盒断开！短信发送情况：发送短信数量：1

------------------------------------


Log Entry : 15:27:28 2021年4月20日 星期二 

主接驳盒断开！短信发送情况：发送短信数量：1

------------------------------------


Log Entry : 15:32:19 2021年4月20日 星期二 

次接驳盒断开！短信发送情况：发送短信数量：1

------------------------------------


Log Entry : 15:35:28 2021年4月20日 星期二 

次接驳盒断开！短信发送情况：发送短信数量：1

------------------------------------


Log Entry : 15:37:11 2021年4月20日 星期二 

次接驳盒断开！短信发送情况：发送短信数量：1

------------------------------------


Log Entry : 15:40:50 2021年4月20日 星期二 

数据采集器1断开！短信发送情况发送短信数量：1

------------------------------------


Log Entry : 15:42:14 2021年4月20日 星期二 

数据采集器1断开！短信发送情况发送短信数量：1

------------------------------------


Log Entry : 15:45:24 2021年4月20日 星期二 

数据采集器1断开！短信发送情况发送短信数量：1

------------------------------------


Log Entry : 15:47:36 2021年4月20日 星期二 

数据采集器1断开！短信发送情况发送短信数量：1

------------------------------------


Log Entry : 15:49:53 2021年4月20日 星期二 

数据采集器1断开！短信发送情况发送短信数量：1

------------------------------------


Log Entry : 15:51:37 2021年4月20日 星期二 

数据采集器1断开！短信发送情况发送短信数量：1

------------------------------------


Log Entry : 16:01:04 2021年4月20日 星期二 

数据采集器1断开！短信发送情况发送短信数量：1

------------------------------------


Log Entry : 16:04:12 2021年4月20日 星期二 

数据采集器1断开！短信发送情况发送短信数量：1

------------------------------------


Log Entry : 10:19:49 2021年4月21日 星期三 

数据采集器1断开！短信发送情况发送短信数量：1

------------------------------------


Log Entry : 10:20:53 2021年4月21日 星期三 

数据采集器1断开！短信发送情况发送短信数量：1

------------------------------------


Log Entry : 13:30:31 2021年4月21日 星期三 

数据采集器1断开！短信发送情况发送短信数量：1

------------------------------------


Log Entry : 14:40:57 2021年4月21日 星期三 

次接驳盒断开！短信发送情况：发送短信数量：1

------------------------------------


Log Entry : 15:18:43 2021年4月21日 星期三 

次接驳盒断开！短信发送情况：发送短信数量：1

------------------------------------


Log Entry : 15:22:21 2021年4月21日 星期三 

次接驳盒断开！短信发送情况：发送短信数量：1

------------------------------------


Log Entry : 15:41:38 2021年4月21日 星期三 

次接驳盒断开！短信发送情况：发送短信数量：1

------------------------------------


Log Entry : 15:47:09 2021年4月21日 星期三 

数据采集器1断开！短信发送情况发送短信数量：1

------------------------------------


Log Entry : 15:48:12 2021年4月21日 星期三 

数据采集器1断开！短信发送情况发送短信数量：1

------------------------------------


Log Entry : 15:50:18 2021年4月21日 星期三 

数据采集器1断开！短信发送情况发送短信数量：1

------------------------------------


Log Entry : 16:00:30 2021年4月21日 星期三 

数据采集器1断开！短信发送情况发送短信数量：1

------------------------------------


Log Entry : 16:11:43 2021年4月21日 星期三 

数据采集器1断开！短信发送情况发送短信数量：1

------------------------------------


Log Entry : 16:14:52 2021年4月21日 星期三 

数据采集器1断开！短信发送情况发送短信数量：1

------------------------------------


Log Entry : 10:45:27 2021年5月14日 星期五 

数据采集器1断开！短信发送情况短信数量不足

------------------------------------


Log Entry : 10:54:13 2021年5月14日 星期五 

次接驳盒断开！短信发送情况：短信数量不足

------------------------------------


Log Entry : 14:38:25 2021年5月14日 星期五 

次接驳盒断开！短信发送情况：短信数量不足

------------------------------------


Log Entry : 10:05:58 2021年5月17日 星期一 

次接驳盒断开！短信发送情况：短信数量不足

------------------------------------


Log Entry : 10:16:27 2021年5月17日 星期一 

次接驳盒断开！短信发送情况：短信数量不足

------------------------------------


Log Entry : 10:18:29 2021年5月17日 星期一 

次接驳盒断开！短信发送情况：短信数量不足

------------------------------------


Log Entry : 10:32:10 2021年5月17日 星期一 

数据采集器1断开！短信发送情况短信数量不足

------------------------------------


Log Entry : 10:34:33 2021年5月17日 星期一 

数据采集器1断开！短信发送情况短信数量不足

------------------------------------


Log Entry : 10:36:01 2021年5月17日 星期一 

数据采集器1断开！短信发送情况短信数量不足

------------------------------------


Log Entry : 14:17:26 2021年5月17日 星期一 

次接驳盒断开！短信发送情况：短信数量不足

------------------------------------


Log Entry : 16:49:18 2021年5月17日 星期一 

数据采集器1断开！短信发送情况短信数量不足

------------------------------------


Log Entry : 10:19:16 2021年5月18日 星期二 

次接驳盒断开！短信发送情况：短信数量不足

------------------------------------


Log Entry : 10:20:30 2021年5月18日 星期二 

数据采集器1断开！短信发送情况短信数量不足

------------------------------------


Log Entry : 10:21:31 2021年5月18日 星期二 

数据采集器1断开！短信发送情况短信数量不足

------------------------------------


Log Entry : 10:23:31 2021年5月18日 星期二 

数据采集器1断开！短信发送情况短信数量不足

------------------------------------


Log Entry : 10:26:18 2021年5月18日 星期二 

数据采集器1断开！短信发送情况短信数量不足

------------------------------------


Log Entry : 10:32:30 2021年5月18日 星期二 

数据采集器1断开！短信发送情况短信数量不足

------------------------------------


Log Entry : 10:41:18 2021年5月18日 星期二 

数据采集器1断开！短信发送情况短信数量不足

------------------------------------


Log Entry : 10:42:22 2021年5月18日 星期二 

次接驳盒断开！短信发送情况：短信数量不足

------------------------------------


Log Entry : 10:47:02 2021年5月18日 星期二 

次接驳盒断开！短信发送情况：短信数量不足

------------------------------------


Log Entry : 10:56:26 2021年5月18日 星期二 

次接驳盒断开！短信发送情况：短信数量不足

------------------------------------


Log Entry : 15:35:25 2021年5月18日 星期二 

次接驳盒断开！短信发送情况：短信数量不足

------------------------------------


Log Entry : 15:36:44 2021年5月18日 星期二 

数据采集器1断开！短信发送情况短信数量不足

------------------------------------


Log Entry : 17:39:10 2021年6月21日 

数据采集器1断开！短信发送情况短信数量不足

------------------------------------


Log Entry : 17:40:34 2021年6月21日 

数据采集器1断开！短信发送情况短信数量不足

------------------------------------


Log Entry : 17:41:37 2021年6月21日 

数据采集器1断开！短信发送情况短信数量不足

------------------------------------


Log Entry : 17:48:22 2021年6月21日 

次接驳盒断开！短信发送情况：短信数量不足

------------------------------------


Log Entry : 17:53:40 2021年6月21日 

数据采集器1断开！短信发送情况短信数量不足

------------------------------------


Log Entry : 10:54:08 2021年6月22日 

数据采集器1断开！短信发送情况短信数量不足

------------------------------------


Log Entry : 10:55:19 2021年6月22日 

数据采集器1断开！短信发送情况短信数量不足

------------------------------------


Log Entry : 13:25:12 2021年6月22日 

次接驳盒断开！短信发送情况：短信数量不足

------------------------------------


Log Entry : 13:34:21 2021年6月22日 

次接驳盒断开！短信发送情况：短信数量不足

------------------------------------


Log Entry : 13:34:37 2021年6月22日 

数据采集器1断开！短信发送情况短信数量不足

------------------------------------


Log Entry : 13:34:37 2021年6月22日 

数据采集器1断开！短信发送情况短信数量不足

------------------------------------


Log Entry : 13:39:27 2021年6月22日 

数据采集器1断开！短信发送情况短信数量不足

------------------------------------


Log Entry : 13:48:20 2021年6月22日 

次接驳盒断开！短信发送情况：短信数量不足

------------------------------------


Log Entry : 13:52:05 2021年6月22日 

数据采集器1断开！短信发送情况短信数量不足

------------------------------------


Log Entry : 13:52:05 2021年6月22日 

数据采集器1断开！短信发送情况短信数量不足

------------------------------------


Log Entry : 13:58:36 2021年6月22日 

数据采集器1断开！短信发送情况短信数量不足

------------------------------------


Log Entry : 13:59:37 2021年6月22日 

数据采集器1断开！短信发送情况短信数量不足

------------------------------------


Log Entry : 14:17:32 2021年6月22日 

次接驳盒断开！短信发送情况：短信数量不足

------------------------------------


Log Entry : 14:24:33 2021年6月22日 

数据采集器1断开！短信发送情况短信数量不足

------------------------------------


Log Entry : 14:26:50 2021年6月22日 

数据采集器1断开！短信发送情况短信数量不足

------------------------------------


Log Entry : 14:29:45 2021年6月22日 

数据采集器1断开！短信发送情况短信数量不足

------------------------------------


Log Entry : 14:35:45 2021年6月22日 

次接驳盒断开！短信发送情况：短信数量不足

------------------------------------


Log Entry : 14:35:47 2021年6月22日 

数据采集器1断开！短信发送情况短信数量不足

------------------------------------


Log Entry : 14:35:47 2021年6月22日 

数据采集器1断开！短信发送情况短信数量不足

------------------------------------


Log Entry : 15:25:15 2021年6月22日 

次接驳盒断开！短信发送情况：短信数量不足

------------------------------------


Log Entry : 15:29:50 2021年6月22日 

数据采集器1断开！短信发送情况短信数量不足

------------------------------------


Log Entry : 15:29:50 2021年6月22日 

数据采集器1断开！短信发送情况短信数量不足

------------------------------------


Log Entry : 15:35:04 2021年6月22日 

次接驳盒断开！短信发送情况：短信数量不足

------------------------------------


Log Entry : 15:41:12 2021年6月22日 

数据采集器1断开！短信发送情况短信数量不足

------------------------------------


Log Entry : 15:43:16 2021年6月22日 

数据采集器1断开！短信发送情况短信数量不足

------------------------------------


Log Entry : 15:45:17 2021年6月22日 

数据采集器1断开！短信发送情况短信数量不足

------------------------------------


Log Entry : 15:47:17 2021年6月22日 

数据采集器1断开！短信发送情况短信数量不足

------------------------------------


Log Entry : 15:52:38 2021年6月22日 

次接驳盒断开！短信发送情况：短信数量不足

------------------------------------


Log Entry : 16:00:28 2021年6月22日 

数据采集器1断开！短信发送情况短信数量不足

------------------------------------


Log Entry : 16:07:20 2021年6月22日 

数据采集器1断开！短信发送情况短信数量不足

------------------------------------


Log Entry : 16:07:21 2021年6月22日 

次接驳盒断开！短信发送情况：短信数量不足

------------------------------------


Log Entry : 16:08:10 2021年6月22日 

次接驳盒断开！短信发送情况：短信数量不足

------------------------------------


Log Entry : 16:09:42 2021年6月22日 

次接驳盒断开！短信发送情况：短信数量不足

------------------------------------


Log Entry : 16:20:54 2021年6月22日 

次接驳盒断开！短信发送情况：短信数量不足

------------------------------------


Log Entry : 16:34:09 2021年6月22日 

次接驳盒断开！短信发送情况：短信数量不足

------------------------------------


Log Entry : 16:42:34 2021年6月22日 

次接驳盒断开！短信发送情况：短信数量不足

------------------------------------


Log Entry : 17:01:08 2021年6月22日 

次接驳盒断开！短信发送情况：短信数量不足

------------------------------------


Log Entry : 10:29:28 2021年6月23日 

数据采集器1断开！短信发送情况短信数量不足

------------------------------------


Log Entry : 10:30:57 2021年6月23日 

数据采集器1断开！短信发送情况短信数量不足

------------------------------------


Log Entry : 10:35:08 2021年6月23日 

数据采集器1断开！短信发送情况短信数量不足

------------------------------------


Log Entry : 10:35:09 2021年6月23日 

数据采集器1断开！短信发送情况短信数量不足

------------------------------------


Log Entry : 10:37:22 2021年6月23日 

数据采集器1断开！短信发送情况短信数量不足

------------------------------------


Log Entry : 10:39:43 2021年6月23日 

数据采集器1断开！短信发送情况短信数量不足

------------------------------------


Log Entry : 10:39:48 2021年6月23日 

次接驳盒断开！短信发送情况：短信数量不足

------------------------------------


Log Entry : 10:57:41 2021年6月23日 

数据采集器1断开！短信发送情况短信数量不足

------------------------------------


Log Entry : 10:57:42 2021年6月23日 

次接驳盒断开！短信发送情况：短信数量不足

------------------------------------


Log Entry : 12:07:03 2021年6月23日 

数据采集器1断开！短信发送情况短信数量不足

------------------------------------


Log Entry : 13:21:44 2021年6月23日 

次接驳盒断开！短信发送情况：短信数量不足

------------------------------------


Log Entry : 13:53:59 2021年6月23日 

次接驳盒断开！短信发送情况：短信数量不足

------------------------------------


Log Entry : 14:01:19 2021年6月23日 

次接驳盒断开！短信发送情况：短信数量不足

------------------------------------


Log Entry : 14:32:09 2021年6月23日 

次接驳盒断开！短信发送情况：短信数量不足

------------------------------------


Log Entry : 14:40:57 2021年6月23日 

次接驳盒断开！短信发送情况：短信数量不足

------------------------------------


Log Entry : 15:37:04 2021年6月23日 

次接驳盒断开！短信发送情况：短信数量不足

------------------------------------


Log Entry : 15:41:28 2021年6月23日 

数据采集器1断开！短信发送情况短信数量不足

------------------------------------


Log Entry : 15:47:15 2021年6月23日 

数据采集器1断开！短信发送情况短信数量不足

------------------------------------


Log Entry : 15:47:15 2021年6月23日 

数据采集器1断开！短信发送情况短信数量不足

------------------------------------


Log Entry : 15:52:39 2021年6月23日 

数据采集器1断开！短信发送情况短信数量不足

------------------------------------


Log Entry : 16:00:09 2021年6月23日 

数据采集器1断开！短信发送情况短信数量不足

------------------------------------


Log Entry : 16:30:28 2021年6月23日 

数据采集器1断开！短信发送情况短信数量不足

------------------------------------


Log Entry : 16:58:13 2021年6月23日 

数据采集器1断开！短信发送情况短信数量不足

------------------------------------


Log Entry : 16:58:13 2021年6月23日 

数据采集器1断开！短信发送情况短信数量不足

------------------------------------


Log Entry : 16:58:14 2021年6月23日 

数据采集器1断开！短信发送情况短信数量不足

------------------------------------


Log Entry : 16:58:14 2021年6月23日 

数据采集器1断开！短信发送情况短信数量不足

------------------------------------


Log Entry : 16:58:14 2021年6月23日 

数据采集器1断开！短信发送情况短信数量不足

------------------------------------


Log Entry : 16:58:14 2021年6月23日 

次接驳盒断开！短信发送情况：短信数量不足

------------------------------------


Log Entry : 17:12:22 2021年6月23日 

次接驳盒断开！短信发送情况：短信数量不足

------------------------------------


Log Entry : 17:34:07 2021年6月23日 

数据采集器1断开！短信发送情况短信数量不足

------------------------------------


Log Entry : 17:34:07 2021年6月23日 

数据采集器1断开！短信发送情况短信数量不足

------------------------------------


Log Entry : 17:34:07 2021年6月23日 

数据采集器1断开！短信发送情况短信数量不足

------------------------------------


Log Entry : 17:34:07 2021年6月23日 

数据采集器1断开！短信发送情况短信数量不足

------------------------------------


Log Entry : 17:34:07 2021年6月23日 

数据采集器1断开！短信发送情况短信数量不足

------------------------------------


Log Entry : 17:39:30 2021年6月23日 

数据采集器1断开！短信发送情况短信数量不足

------------------------------------


Log Entry : 17:41:00 2021年6月23日 

数据采集器1断开！短信发送情况短信数量不足

------------------------------------


Log Entry : 17:43:44 2021年6月23日 

数据采集器1断开！短信发送情况短信数量不足

------------------------------------


Log Entry : 17:43:44 2021年6月23日 

数据采集器1断开！短信发送情况短信数量不足

------------------------------------


Log Entry : 17:43:44 2021年6月23日 

数据采集器1断开！短信发送情况短信数量不足

------------------------------------


Log Entry : 17:43:44 2021年6月23日 

数据采集器1断开！短信发送情况短信数量不足

------------------------------------


Log Entry : 17:43:44 2021年6月23日 

数据采集器1断开！短信发送情况短信数量不足

------------------------------------


Log Entry : 17:43:44 2021年6月23日 

数据采集器1断开！短信发送情况短信数量不足

------------------------------------


Log Entry : 17:44:15 2021年6月23日 

数据采集器1断开！短信发送情况短信数量不足

------------------------------------


Log Entry : 17:44:15 2021年6月23日 

数据采集器1断开！短信发送情况短信数量不足

------------------------------------


Log Entry : 17:44:15 2021年6月23日 

数据采集器1断开！短信发送情况短信数量不足

------------------------------------


Log Entry : 17:44:15 2021年6月23日 

数据采集器1断开！短信发送情况短信数量不足

------------------------------------


Log Entry : 17:45:21 2021年6月23日 

数据采集器1断开！短信发送情况短信数量不足

------------------------------------


Log Entry : 17:49:05 2021年6月23日 

数据采集器1断开！短信发送情况短信数量不足

------------------------------------


Log Entry : 17:49:05 2021年6月23日 

数据采集器1断开！短信发送情况短信数量不足

------------------------------------


Log Entry : 17:49:05 2021年6月23日 

数据采集器1断开！短信发送情况短信数量不足

------------------------------------


Log Entry : 17:49:05 2021年6月23日 

数据采集器1断开！短信发送情况短信数量不足

------------------------------------


Log Entry : 17:49:05 2021年6月23日 

数据采集器1断开！短信发送情况短信数量不足

------------------------------------


Log Entry : 9:54:33 2021年6月24日 

次接驳盒断开！短信发送情况：短信数量不足

------------------------------------


Log Entry : 9:57:27 2021年6月24日 

数据采集器1断开！短信发送情况短信数量不足

------------------------------------


Log Entry : 10:00:09 2021年6月24日 

数据采集器1断开！短信发送情况短信数量不足

------------------------------------


Log Entry : 10:03:17 2021年6月24日 

数据采集器1断开！短信发送情况短信数量不足

------------------------------------


Log Entry : 10:03:29 2021年6月24日 

次接驳盒断开！短信发送情况：短信数量不足

------------------------------------


Log Entry : 10:06:11 2021年6月24日 

数据采集器1断开！短信发送情况短信数量不足

------------------------------------


Log Entry : 10:48:51 2021年6月24日 

次接驳盒断开！短信发送情况：短信数量不足

------------------------------------


Log Entry : 10:58:40 2021年6月24日 

次接驳盒断开！短信发送情况：短信数量不足

------------------------------------


Log Entry : 11:02:36 2021年6月24日 

次接驳盒断开！短信发送情况：值不能为 null。
参数名: String

------------------------------------


Log Entry : 12:11:50 2021年6月24日 

数据采集器1断开！短信发送情况短信数量不足

------------------------------------


Log Entry : 14:12:28 2021年6月24日 

数据采集器1断开！短信发送情况短信数量不足

------------------------------------


Log Entry : 14:32:25 2021年6月24日 

次接驳盒断开！短信发送情况：短信数量不足

------------------------------------


Log Entry : 14:52:26 2021年6月24日 

数据采集器1断开！短信发送情况短信数量不足

------------------------------------


Log Entry : 14:54:54 2021年6月24日 

数据采集器1断开！短信发送情况短信数量不足

------------------------------------


Log Entry : 15:03:16 2021年6月24日 

次接驳盒断开！短信发送情况：短信数量不足

------------------------------------


Log Entry : 14:30:06 2021年8月16日 

次接驳盒断开！短信发送情况：短信数量不足

------------------------------------


Log Entry : 14:30:08 2021年8月16日 

次接驳盒断开！短信发送情况：短信数量不足

------------------------------------


Log Entry : 14:30:09 2021年8月16日 

次接驳盒断开！短信发送情况：短信数量不足

------------------------------------


Log Entry : 14:30:10 2021年8月16日 

次接驳盒断开！短信发送情况：短信数量不足

------------------------------------


Log Entry : 14:30:11 2021年8月16日 

次接驳盒断开！短信发送情况：短信数量不足

------------------------------------


Log Entry : 14:30:12 2021年8月16日 

次接驳盒断开！短信发送情况：短信数量不足

------------------------------------


Log Entry : 14:30:13 2021年8月16日 

次接驳盒断开！短信发送情况：短信数量不足

------------------------------------


Log Entry : 14:30:14 2021年8月16日 

次接驳盒断开！短信发送情况：短信数量不足

------------------------------------


Log Entry : 14:30:15 2021年8月16日 

次接驳盒断开！短信发送情况：短信数量不足

------------------------------------


Log Entry : 14:30:16 2021年8月16日 

次接驳盒断开！短信发送情况：短信数量不足

------------------------------------


Log Entry : 14:30:17 2021年8月16日 

次接驳盒断开！短信发送情况：短信数量不足

------------------------------------


Log Entry : 14:30:19 2021年8月16日 

次接驳盒断开！短信发送情况：短信数量不足

------------------------------------


Log Entry : 14:30:20 2021年8月16日 

次接驳盒断开！短信发送情况：短信数量不足

------------------------------------


Log Entry : 14:30:21 2021年8月16日 

次接驳盒断开！短信发送情况：短信数量不足

------------------------------------


Log Entry : 14:30:22 2021年8月16日 

次接驳盒断开！短信发送情况：短信数量不足

------------------------------------


Log Entry : 14:30:23 2021年8月16日 

次接驳盒断开！短信发送情况：短信数量不足

------------------------------------


Log Entry : 14:30:24 2021年8月16日 

次接驳盒断开！短信发送情况：短信数量不足

------------------------------------


Log Entry : 14:30:25 2021年8月16日 

次接驳盒断开！短信发送情况：短信数量不足

------------------------------------


Log Entry : 14:30:26 2021年8月16日 

次接驳盒断开！短信发送情况：短信数量不足

------------------------------------


Log Entry : 14:30:27 2021年8月16日 

次接驳盒断开！短信发送情况：短信数量不足

------------------------------------


Log Entry : 14:30:28 2021年8月16日 

次接驳盒断开！短信发送情况：短信数量不足

------------------------------------


Log Entry : 14:30:30 2021年8月16日 

次接驳盒断开！短信发送情况：短信数量不足

------------------------------------


Log Entry : 14:30:31 2021年8月16日 

次接驳盒断开！短信发送情况：短信数量不足

------------------------------------


Log Entry : 14:30:32 2021年8月16日 

次接驳盒断开！短信发送情况：短信数量不足

------------------------------------


Log Entry : 14:30:33 2021年8月16日 

次接驳盒断开！短信发送情况：短信数量不足

------------------------------------


Log Entry : 14:30:34 2021年8月16日 

次接驳盒断开！短信发送情况：短信数量不足

------------------------------------


Log Entry : 14:30:35 2021年8月16日 

主接驳盒断开！短信发送情况：短信数量不足

------------------------------------


Log Entry : 14:30:35 2021年8月16日 

次接驳盒断开！短信发送情况：短信数量不足

------------------------------------


Log Entry : 14:30:36 2021年8月16日 

次接驳盒断开！短信发送情况：短信数量不足

------------------------------------


Log Entry : 14:30:37 2021年8月16日 

次接驳盒断开！短信发送情况：短信数量不足

------------------------------------


Log Entry : 14:30:38 2021年8月16日 

次接驳盒断开！短信发送情况：短信数量不足

------------------------------------


Log Entry : 14:30:39 2021年8月16日 

次接驳盒断开！短信发送情况：短信数量不足

------------------------------------


Log Entry : 14:30:40 2021年8月16日 

次接驳盒断开！短信发送情况：短信数量不足

------------------------------------


Log Entry : 14:30:42 2021年8月16日 

次接驳盒断开！短信发送情况：短信数量不足

------------------------------------


Log Entry : 14:30:43 2021年8月16日 

次接驳盒断开！短信发送情况：短信数量不足

------------------------------------


Log Entry : 14:30:44 2021年8月16日 

次接驳盒断开！短信发送情况：短信数量不足

------------------------------------


Log Entry : 14:30:45 2021年8月16日 

次接驳盒断开！短信发送情况：短信数量不足

------------------------------------


Log Entry : 14:30:46 2021年8月16日 

次接驳盒断开！短信发送情况：短信数量不足

------------------------------------


Log Entry : 14:30:47 2021年8月16日 

次接驳盒断开！短信发送情况：短信数量不足

------------------------------------


Log Entry : 14:30:48 2021年8月16日 

次接驳盒断开！短信发送情况：短信数量不足

------------------------------------


Log Entry : 14:30:49 2021年8月16日 

次接驳盒断开！短信发送情况：短信数量不足

------------------------------------


Log Entry : 14:30:50 2021年8月16日 

次接驳盒断开！短信发送情况：短信数量不足

------------------------------------


Log Entry : 14:30:52 2021年8月16日 

次接驳盒断开！短信发送情况：短信数量不足

------------------------------------


Log Entry : 14:30:53 2021年8月16日 

次接驳盒断开！短信发送情况：短信数量不足

------------------------------------


Log Entry : 14:30:54 2021年8月16日 

次接驳盒断开！短信发送情况：短信数量不足

------------------------------------


Log Entry : 14:30:55 2021年8月16日 

次接驳盒断开！短信发送情况：短信数量不足

------------------------------------


Log Entry : 14:30:56 2021年8月16日 

次接驳盒断开！短信发送情况：短信数量不足

------------------------------------


Log Entry : 14:30:57 2021年8月16日 

次接驳盒断开！短信发送情况：短信数量不足

------------------------------------


Log Entry : 14:30:58 2021年8月16日 

次接驳盒断开！短信发送情况：短信数量不足

------------------------------------


Log Entry : 14:30:59 2021年8月16日 

次接驳盒断开！短信发送情况：短信数量不足

------------------------------------


Log Entry : 14:31:01 2021年8月16日 

次接驳盒断开！短信发送情况：短信数量不足

------------------------------------


Log Entry : 14:31:02 2021年8月16日 

次接驳盒断开！短信发送情况：短信数量不足

------------------------------------


Log Entry : 14:31:03 2021年8月16日 

次接驳盒断开！短信发送情况：短信数量不足

------------------------------------


Log Entry : 14:31:04 2021年8月16日 

次接驳盒断开！短信发送情况：短信数量不足

------------------------------------


Log Entry : 14:31:05 2021年8月16日 

次接驳盒断开！短信发送情况：短信数量不足

------------------------------------


Log Entry : 14:31:06 2021年8月16日 

次接驳盒断开！短信发送情况：短信数量不足

------------------------------------


Log Entry : 14:31:07 2021年8月16日 

次接驳盒断开！短信发送情况：短信数量不足

------------------------------------


Log Entry : 14:31:08 2021年8月16日 

次接驳盒断开！短信发送情况：短信数量不足

------------------------------------


Log Entry : 14:31:09 2021年8月16日 

次接驳盒断开！短信发送情况：短信数量不足

------------------------------------


Log Entry : 14:31:11 2021年8月16日 

次接驳盒断开！短信发送情况：短信数量不足

------------------------------------


Log Entry : 14:31:12 2021年8月16日 

次接驳盒断开！短信发送情况：短信数量不足

------------------------------------


Log Entry : 14:31:13 2021年8月16日 

次接驳盒断开！短信发送情况：短信数量不足

------------------------------------


Log Entry : 14:31:14 2021年8月16日 

次接驳盒断开！短信发送情况：短信数量不足

------------------------------------


Log Entry : 14:31:15 2021年8月16日 

次接驳盒断开！短信发送情况：短信数量不足

------------------------------------


Log Entry : 14:31:16 2021年8月16日 

次接驳盒断开！短信发送情况：短信数量不足

------------------------------------


Log Entry : 14:31:17 2021年8月16日 

次接驳盒断开！短信发送情况：短信数量不足

------------------------------------


Log Entry : 14:31:18 2021年8月16日 

次接驳盒断开！短信发送情况：短信数量不足

------------------------------------


Log Entry : 14:31:19 2021年8月16日 

次接驳盒断开！短信发送情况：短信数量不足

------------------------------------


Log Entry : 14:31:21 2021年8月16日 

次接驳盒断开！短信发送情况：短信数量不足

------------------------------------


Log Entry : 14:31:22 2021年8月16日 

次接驳盒断开！短信发送情况：短信数量不足

------------------------------------


Log Entry : 14:31:23 2021年8月16日 

次接驳盒断开！短信发送情况：短信数量不足

------------------------------------


Log Entry : 14:31:24 2021年8月16日 

次接驳盒断开！短信发送情况：短信数量不足

------------------------------------


Log Entry : 14:31:25 2021年8月16日 

次接驳盒断开！短信发送情况：短信数量不足

------------------------------------


Log Entry : 14:31:26 2021年8月16日 

次接驳盒断开！短信发送情况：短信数量不足

------------------------------------


Log Entry : 14:31:27 2021年8月16日 

次接驳盒断开！短信发送情况：短信数量不足

------------------------------------


Log Entry : 14:31:28 2021年8月16日 

次接驳盒断开！短信发送情况：短信数量不足

------------------------------------


Log Entry : 14:31:30 2021年8月16日 

次接驳盒断开！短信发送情况：短信数量不足

------------------------------------


Log Entry : 14:31:31 2021年8月16日 

次接驳盒断开！短信发送情况：短信数量不足

------------------------------------


Log Entry : 14:31:32 2021年8月16日 

次接驳盒断开！短信发送情况：短信数量不足

------------------------------------


Log Entry : 14:31:33 2021年8月16日 

次接驳盒断开！短信发送情况：短信数量不足

------------------------------------


Log Entry : 14:31:34 2021年8月16日 

次接驳盒断开！短信发送情况：短信数量不足

------------------------------------


Log Entry : 14:31:35 2021年8月16日 

次接驳盒断开！短信发送情况：短信数量不足

------------------------------------


Log Entry : 14:31:36 2021年8月16日 

次接驳盒断开！短信发送情况：短信数量不足

------------------------------------


Log Entry : 14:31:37 2021年8月16日 

次接驳盒断开！短信发送情况：短信数量不足

------------------------------------


Log Entry : 14:31:38 2021年8月16日 

次接驳盒断开！短信发送情况：短信数量不足

------------------------------------


Log Entry : 14:31:39 2021年8月16日 

次接驳盒断开！短信发送情况：短信数量不足

------------------------------------


Log Entry : 14:31:41 2021年8月16日 

次接驳盒断开！短信发送情况：短信数量不足

------------------------------------


Log Entry : 14:31:42 2021年8月16日 

次接驳盒断开！短信发送情况：短信数量不足

------------------------------------


Log Entry : 14:31:43 2021年8月16日 

次接驳盒断开！短信发送情况：短信数量不足

------------------------------------


Log Entry : 14:31:44 2021年8月16日 

次接驳盒断开！短信发送情况：短信数量不足

------------------------------------


Log Entry : 14:31:45 2021年8月16日 

次接驳盒断开！短信发送情况：短信数量不足

------------------------------------


Log Entry : 14:31:46 2021年8月16日 

次接驳盒断开！短信发送情况：短信数量不足

------------------------------------


Log Entry : 14:31:47 2021年8月16日 

次接驳盒断开！短信发送情况：短信数量不足

------------------------------------


Log Entry : 14:31:48 2021年8月16日 

次接驳盒断开！短信发送情况：短信数量不足

------------------------------------


Log Entry : 14:31:49 2021年8月16日 

次接驳盒断开！短信发送情况：短信数量不足

------------------------------------


Log Entry : 14:31:51 2021年8月16日 

次接驳盒断开！短信发送情况：短信数量不足

------------------------------------


Log Entry : 14:31:52 2021年8月16日 

次接驳盒断开！短信发送情况：短信数量不足

------------------------------------


Log Entry : 14:31:53 2021年8月16日 

次接驳盒断开！短信发送情况：短信数量不足

------------------------------------


Log Entry : 14:31:54 2021年8月16日 

次接驳盒断开！短信发送情况：短信数量不足

------------------------------------


Log Entry : 14:31:55 2021年8月16日 

次接驳盒断开！短信发送情况：短信数量不足

------------------------------------


Log Entry : 14:31:56 2021年8月16日 

次接驳盒断开！短信发送情况：短信数量不足

------------------------------------


Log Entry : 14:31:57 2021年8月16日 

次接驳盒断开！短信发送情况：短信数量不足

------------------------------------


Log Entry : 14:31:58 2021年8月16日 

次接驳盒断开！短信发送情况：短信数量不足

------------------------------------


Log Entry : 14:31:59 2021年8月16日 

次接驳盒断开！短信发送情况：短信数量不足

------------------------------------


Log Entry : 14:32:01 2021年8月16日 

次接驳盒断开！短信发送情况：短信数量不足

------------------------------------


Log Entry : 14:32:02 2021年8月16日 

次接驳盒断开！短信发送情况：短信数量不足

------------------------------------


Log Entry : 14:32:03 2021年8月16日 

次接驳盒断开！短信发送情况：短信数量不足

------------------------------------


Log Entry : 14:32:04 2021年8月16日 

次接驳盒断开！短信发送情况：短信数量不足

------------------------------------


Log Entry : 14:32:05 2021年8月16日 

次接驳盒断开！短信发送情况：短信数量不足

------------------------------------


Log Entry : 14:32:06 2021年8月16日 

次接驳盒断开！短信发送情况：短信数量不足

------------------------------------


Log Entry : 14:32:07 2021年8月16日 

次接驳盒断开！短信发送情况：短信数量不足

------------------------------------


Log Entry : 14:32:08 2021年8月16日 

次接驳盒断开！短信发送情况：短信数量不足

------------------------------------


Log Entry : 14:32:09 2021年8月16日 

次接驳盒断开！短信发送情况：短信数量不足

------------------------------------


Log Entry : 14:32:11 2021年8月16日 

次接驳盒断开！短信发送情况：短信数量不足

------------------------------------


Log Entry : 14:32:12 2021年8月16日 

次接驳盒断开！短信发送情况：短信数量不足

------------------------------------


Log Entry : 14:32:13 2021年8月16日 

次接驳盒断开！短信发送情况：短信数量不足

------------------------------------


Log Entry : 14:32:14 2021年8月16日 

次接驳盒断开！短信发送情况：短信数量不足

------------------------------------


Log Entry : 14:32:15 2021年8月16日 

次接驳盒断开！短信发送情况：短信数量不足

------------------------------------


Log Entry : 14:32:16 2021年8月16日 

次接驳盒断开！短信发送情况：短信数量不足

------------------------------------


Log Entry : 14:32:17 2021年8月16日 

次接驳盒断开！短信发送情况：短信数量不足

------------------------------------


Log Entry : 14:32:18 2021年8月16日 

次接驳盒断开！短信发送情况：短信数量不足

------------------------------------


Log Entry : 14:32:20 2021年8月16日 

次接驳盒断开！短信发送情况：短信数量不足

------------------------------------


Log Entry : 14:32:21 2021年8月16日 

次接驳盒断开！短信发送情况：短信数量不足

------------------------------------


Log Entry : 14:32:22 2021年8月16日 

次接驳盒断开！短信发送情况：短信数量不足

------------------------------------


Log Entry : 14:32:23 2021年8月16日 

次接驳盒断开！短信发送情况：短信数量不足

------------------------------------


Log Entry : 14:32:24 2021年8月16日 

次接驳盒断开！短信发送情况：短信数量不足

------------------------------------


Log Entry : 14:32:25 2021年8月16日 

次接驳盒断开！短信发送情况：短信数量不足

------------------------------------


Log Entry : 14:32:26 2021年8月16日 

次接驳盒断开！短信发送情况：短信数量不足

------------------------------------


Log Entry : 14:32:27 2021年8月16日 

次接驳盒断开！短信发送情况：短信数量不足

------------------------------------


Log Entry : 14:32:28 2021年8月16日 

次接驳盒断开！短信发送情况：短信数量不足

------------------------------------


Log Entry : 14:32:30 2021年8月16日 

次接驳盒断开！短信发送情况：短信数量不足

------------------------------------


Log Entry : 14:32:31 2021年8月16日 

次接驳盒断开！短信发送情况：短信数量不足

------------------------------------


Log Entry : 14:32:32 2021年8月16日 

次接驳盒断开！短信发送情况：短信数量不足

------------------------------------


Log Entry : 14:32:33 2021年8月16日 

次接驳盒断开！短信发送情况：短信数量不足

------------------------------------


Log Entry : 14:32:34 2021年8月16日 

次接驳盒断开！短信发送情况：短信数量不足

------------------------------------


Log Entry : 14:32:35 2021年8月16日 

次接驳盒断开！短信发送情况：短信数量不足

------------------------------------


Log Entry : 14:32:36 2021年8月16日 

次接驳盒断开！短信发送情况：短信数量不足

------------------------------------


Log Entry : 14:32:37 2021年8月16日 

次接驳盒断开！短信发送情况：短信数量不足

------------------------------------


Log Entry : 14:32:38 2021年8月16日 

次接驳盒断开！短信发送情况：短信数量不足

------------------------------------


Log Entry : 14:32:39 2021年8月16日 

次接驳盒断开！短信发送情况：短信数量不足

------------------------------------


Log Entry : 14:32:41 2021年8月16日 

次接驳盒断开！短信发送情况：短信数量不足

------------------------------------


Log Entry : 14:32:42 2021年8月16日 

次接驳盒断开！短信发送情况：短信数量不足

------------------------------------


Log Entry : 14:32:43 2021年8月16日 

次接驳盒断开！短信发送情况：短信数量不足

------------------------------------


Log Entry : 14:32:44 2021年8月16日 

次接驳盒断开！短信发送情况：短信数量不足

------------------------------------


Log Entry : 14:32:45 2021年8月16日 

次接驳盒断开！短信发送情况：短信数量不足

------------------------------------


Log Entry : 14:32:46 2021年8月16日 

次接驳盒断开！短信发送情况：短信数量不足

------------------------------------


Log Entry : 14:32:47 2021年8月16日 

次接驳盒断开！短信发送情况：短信数量不足

------------------------------------


Log Entry : 14:32:48 2021年8月16日 

次接驳盒断开！短信发送情况：短信数量不足

------------------------------------


Log Entry : 14:32:50 2021年8月16日 

次接驳盒断开！短信发送情况：短信数量不足

------------------------------------


Log Entry : 14:32:51 2021年8月16日 

次接驳盒断开！短信发送情况：短信数量不足

------------------------------------


Log Entry : 14:32:52 2021年8月16日 

次接驳盒断开！短信发送情况：短信数量不足

------------------------------------


Log Entry : 14:32:53 2021年8月16日 

次接驳盒断开！短信发送情况：短信数量不足

------------------------------------


Log Entry : 14:32:54 2021年8月16日 

次接驳盒断开！短信发送情况：短信数量不足

------------------------------------


Log Entry : 14:32:55 2021年8月16日 

次接驳盒断开！短信发送情况：短信数量不足

------------------------------------


Log Entry : 14:32:56 2021年8月16日 

次接驳盒断开！短信发送情况：短信数量不足

------------------------------------


Log Entry : 14:32:57 2021年8月16日 

次接驳盒断开！短信发送情况：短信数量不足

------------------------------------


Log Entry : 14:32:58 2021年8月16日 

次接驳盒断开！短信发送情况：短信数量不足

------------------------------------


Log Entry : 14:33:00 2021年8月16日 

次接驳盒断开！短信发送情况：短信数量不足

------------------------------------


Log Entry : 14:33:01 2021年8月16日 

次接驳盒断开！短信发送情况：短信数量不足

------------------------------------


Log Entry : 14:33:02 2021年8月16日 

次接驳盒断开！短信发送情况：短信数量不足

------------------------------------


Log Entry : 14:33:03 2021年8月16日 

次接驳盒断开！短信发送情况：短信数量不足

------------------------------------


Log Entry : 14:33:04 2021年8月16日 

次接驳盒断开！短信发送情况：短信数量不足

------------------------------------


Log Entry : 14:33:05 2021年8月16日 

次接驳盒断开！短信发送情况：短信数量不足

------------------------------------


Log Entry : 14:33:06 2021年8月16日 

次接驳盒断开！短信发送情况：短信数量不足

------------------------------------


Log Entry : 14:33:07 2021年8月16日 

次接驳盒断开！短信发送情况：短信数量不足

------------------------------------


Log Entry : 14:33:08 2021年8月16日 

次接驳盒断开！短信发送情况：短信数量不足

------------------------------------


Log Entry : 14:33:10 2021年8月16日 

次接驳盒断开！短信发送情况：短信数量不足

------------------------------------


Log Entry : 14:33:11 2021年8月16日 

次接驳盒断开！短信发送情况：短信数量不足

------------------------------------


Log Entry : 14:33:12 2021年8月16日 

次接驳盒断开！短信发送情况：短信数量不足

------------------------------------


Log Entry : 14:33:13 2021年8月16日 

次接驳盒断开！短信发送情况：短信数量不足

------------------------------------


Log Entry : 14:33:14 2021年8月16日 

次接驳盒断开！短信发送情况：短信数量不足

------------------------------------


Log Entry : 14:33:15 2021年8月16日 

次接驳盒断开！短信发送情况：短信数量不足

------------------------------------


Log Entry : 14:33:16 2021年8月16日 

次接驳盒断开！短信发送情况：短信数量不足

------------------------------------


Log Entry : 14:33:18 2021年8月16日 

次接驳盒断开！短信发送情况：短信数量不足

------------------------------------


Log Entry : 14:33:19 2021年8月16日 

次接驳盒断开！短信发送情况：短信数量不足

------------------------------------


Log Entry : 14:33:20 2021年8月16日 

次接驳盒断开！短信发送情况：短信数量不足

------------------------------------


Log Entry : 14:33:21 2021年8月16日 

次接驳盒断开！短信发送情况：短信数量不足

------------------------------------


Log Entry : 14:33:22 2021年8月16日 

次接驳盒断开！短信发送情况：短信数量不足

------------------------------------


Log Entry : 14:33:23 2021年8月16日 

次接驳盒断开！短信发送情况：短信数量不足

------------------------------------


Log Entry : 14:33:24 2021年8月16日 

次接驳盒断开！短信发送情况：短信数量不足

------------------------------------


Log Entry : 14:33:25 2021年8月16日 

次接驳盒断开！短信发送情况：短信数量不足

------------------------------------


Log Entry : 14:33:26 2021年8月16日 

次接驳盒断开！短信发送情况：短信数量不足

------------------------------------


Log Entry : 14:33:27 2021年8月16日 

次接驳盒断开！短信发送情况：短信数量不足

------------------------------------


Log Entry : 14:33:29 2021年8月16日 

次接驳盒断开！短信发送情况：短信数量不足

------------------------------------


Log Entry : 14:33:30 2021年8月16日 

次接驳盒断开！短信发送情况：短信数量不足

------------------------------------


Log Entry : 14:33:31 2021年8月16日 

次接驳盒断开！短信发送情况：短信数量不足

------------------------------------


Log Entry : 14:33:32 2021年8月16日 

次接驳盒断开！短信发送情况：短信数量不足

------------------------------------


Log Entry : 14:33:33 2021年8月16日 

次接驳盒断开！短信发送情况：短信数量不足

------------------------------------


Log Entry : 14:33:34 2021年8月16日 

次接驳盒断开！短信发送情况：短信数量不足

------------------------------------


Log Entry : 14:33:35 2021年8月16日 

次接驳盒断开！短信发送情况：短信数量不足

------------------------------------


Log Entry : 14:33:36 2021年8月16日 

次接驳盒断开！短信发送情况：短信数量不足

------------------------------------


Log Entry : 14:33:37 2021年8月16日 

次接驳盒断开！短信发送情况：短信数量不足

------------------------------------


Log Entry : 14:33:39 2021年8月16日 

次接驳盒断开！短信发送情况：短信数量不足

------------------------------------


Log Entry : 14:33:40 2021年8月16日 

次接驳盒断开！短信发送情况：短信数量不足

------------------------------------


Log Entry : 14:33:41 2021年8月16日 

次接驳盒断开！短信发送情况：短信数量不足

------------------------------------


Log Entry : 14:33:42 2021年8月16日 

次接驳盒断开！短信发送情况：短信数量不足

------------------------------------


Log Entry : 14:33:43 2021年8月16日 

次接驳盒断开！短信发送情况：短信数量不足

------------------------------------


Log Entry : 14:33:44 2021年8月16日 

次接驳盒断开！短信发送情况：短信数量不足

------------------------------------


Log Entry : 14:33:45 2021年8月16日 

次接驳盒断开！短信发送情况：短信数量不足

------------------------------------


Log Entry : 14:33:46 2021年8月16日 

次接驳盒断开！短信发送情况：短信数量不足

------------------------------------


Log Entry : 14:33:47 2021年8月16日 

次接驳盒断开！短信发送情况：短信数量不足

------------------------------------


Log Entry : 14:33:49 2021年8月16日 

次接驳盒断开！短信发送情况：短信数量不足

------------------------------------


Log Entry : 14:33:50 2021年8月16日 

次接驳盒断开！短信发送情况：短信数量不足

------------------------------------


Log Entry : 14:33:51 2021年8月16日 

次接驳盒断开！短信发送情况：短信数量不足

------------------------------------


Log Entry : 14:33:52 2021年8月16日 

次接驳盒断开！短信发送情况：短信数量不足

------------------------------------


Log Entry : 14:33:53 2021年8月16日 

次接驳盒断开！短信发送情况：短信数量不足

------------------------------------


Log Entry : 14:33:54 2021年8月16日 

次接驳盒断开！短信发送情况：短信数量不足

------------------------------------


Log Entry : 14:33:55 2021年8月16日 

次接驳盒断开！短信发送情况：短信数量不足

------------------------------------


Log Entry : 14:33:56 2021年8月16日 

次接驳盒断开！短信发送情况：短信数量不足

------------------------------------


Log Entry : 14:33:57 2021年8月16日 

次接驳盒断开！短信发送情况：短信数量不足

------------------------------------


Log Entry : 14:33:59 2021年8月16日 

次接驳盒断开！短信发送情况：短信数量不足

------------------------------------


Log Entry : 14:34:00 2021年8月16日 

次接驳盒断开！短信发送情况：短信数量不足

------------------------------------


Log Entry : 14:34:01 2021年8月16日 

次接驳盒断开！短信发送情况：短信数量不足

------------------------------------


Log Entry : 14:34:02 2021年8月16日 

次接驳盒断开！短信发送情况：短信数量不足

------------------------------------


Log Entry : 14:34:03 2021年8月16日 

次接驳盒断开！短信发送情况：短信数量不足

------------------------------------


Log Entry : 14:34:04 2021年8月16日 

次接驳盒断开！短信发送情况：短信数量不足

------------------------------------


Log Entry : 14:34:05 2021年8月16日 

次接驳盒断开！短信发送情况：短信数量不足

------------------------------------


Log Entry : 14:34:06 2021年8月16日 

次接驳盒断开！短信发送情况：短信数量不足

------------------------------------


Log Entry : 14:34:07 2021年8月16日 

次接驳盒断开！短信发送情况：短信数量不足

------------------------------------


Log Entry : 14:34:09 2021年8月16日 

次接驳盒断开！短信发送情况：短信数量不足

------------------------------------


Log Entry : 14:34:10 2021年8月16日 

次接驳盒断开！短信发送情况：短信数量不足

------------------------------------


Log Entry : 14:34:11 2021年8月16日 

次接驳盒断开！短信发送情况：短信数量不足

------------------------------------


Log Entry : 14:34:12 2021年8月16日 

次接驳盒断开！短信发送情况：短信数量不足

------------------------------------


Log Entry : 14:34:13 2021年8月16日 

次接驳盒断开！短信发送情况：短信数量不足

------------------------------------


Log Entry : 14:34:14 2021年8月16日 

次接驳盒断开！短信发送情况：短信数量不足

------------------------------------


Log Entry : 14:34:15 2021年8月16日 

次接驳盒断开！短信发送情况：短信数量不足

------------------------------------


Log Entry : 14:34:16 2021年8月16日 

次接驳盒断开！短信发送情况：短信数量不足

------------------------------------


Log Entry : 14:34:17 2021年8月16日 

次接驳盒断开！短信发送情况：短信数量不足

------------------------------------


Log Entry : 14:34:19 2021年8月16日 

次接驳盒断开！短信发送情况：短信数量不足

------------------------------------


Log Entry : 14:34:20 2021年8月16日 

次接驳盒断开！短信发送情况：短信数量不足

------------------------------------


Log Entry : 14:34:21 2021年8月16日 

次接驳盒断开！短信发送情况：短信数量不足

------------------------------------


Log Entry : 14:34:22 2021年8月16日 

次接驳盒断开！短信发送情况：短信数量不足

------------------------------------


Log Entry : 14:34:23 2021年8月16日 

次接驳盒断开！短信发送情况：短信数量不足

------------------------------------


Log Entry : 14:34:24 2021年8月16日 

次接驳盒断开！短信发送情况：短信数量不足

------------------------------------


Log Entry : 14:34:25 2021年8月16日 

次接驳盒断开！短信发送情况：短信数量不足

------------------------------------


Log Entry : 14:34:26 2021年8月16日 

次接驳盒断开！短信发送情况：短信数量不足

------------------------------------


Log Entry : 14:34:28 2021年8月16日 

次接驳盒断开！短信发送情况：短信数量不足

------------------------------------


Log Entry : 14:34:29 2021年8月16日 

次接驳盒断开！短信发送情况：短信数量不足

------------------------------------


Log Entry : 14:34:30 2021年8月16日 

次接驳盒断开！短信发送情况：短信数量不足

------------------------------------


Log Entry : 14:34:31 2021年8月16日 

次接驳盒断开！短信发送情况：短信数量不足

------------------------------------


Log Entry : 14:34:32 2021年8月16日 

次接驳盒断开！短信发送情况：短信数量不足

------------------------------------


Log Entry : 14:34:33 2021年8月16日 

次接驳盒断开！短信发送情况：短信数量不足

------------------------------------


Log Entry : 14:34:34 2021年8月16日 

次接驳盒断开！短信发送情况：短信数量不足

------------------------------------


Log Entry : 14:34:35 2021年8月16日 

次接驳盒断开！短信发送情况：短信数量不足

------------------------------------


Log Entry : 14:34:37 2021年8月16日 

次接驳盒断开！短信发送情况：短信数量不足

------------------------------------


Log Entry : 14:34:38 2021年8月16日 

次接驳盒断开！短信发送情况：短信数量不足

------------------------------------


Log Entry : 14:34:39 2021年8月16日 

次接驳盒断开！短信发送情况：短信数量不足

------------------------------------


Log Entry : 14:34:41 2021年8月16日 

次接驳盒断开！短信发送情况：短信数量不足

------------------------------------


Log Entry : 14:34:42 2021年8月16日 

次接驳盒断开！短信发送情况：短信数量不足

------------------------------------


Log Entry : 14:34:43 2021年8月16日 

次接驳盒断开！短信发送情况：短信数量不足

------------------------------------


Log Entry : 14:34:44 2021年8月16日 

次接驳盒断开！短信发送情况：短信数量不足

------------------------------------


Log Entry : 14:34:45 2021年8月16日 

次接驳盒断开！短信发送情况：短信数量不足

------------------------------------


Log Entry : 14:34:46 2021年8月16日 

次接驳盒断开！短信发送情况：短信数量不足

------------------------------------


Log Entry : 14:34:47 2021年8月16日 

次接驳盒断开！短信发送情况：短信数量不足

------------------------------------


Log Entry : 14:34:48 2021年8月16日 

次接驳盒断开！短信发送情况：短信数量不足

------------------------------------


Log Entry : 14:34:50 2021年8月16日 

次接驳盒断开！短信发送情况：短信数量不足

------------------------------------


Log Entry : 14:34:51 2021年8月16日 

次接驳盒断开！短信发送情况：短信数量不足

------------------------------------


Log Entry : 14:34:52 2021年8月16日 

次接驳盒断开！短信发送情况：短信数量不足

------------------------------------


Log Entry : 14:34:53 2021年8月16日 

次接驳盒断开！短信发送情况：短信数量不足

------------------------------------


Log Entry : 14:34:54 2021年8月16日 

次接驳盒断开！短信发送情况：短信数量不足

------------------------------------


Log Entry : 14:34:55 2021年8月16日 

次接驳盒断开！短信发送情况：短信数量不足

------------------------------------


Log Entry : 14:34:56 2021年8月16日 

次接驳盒断开！短信发送情况：短信数量不足

------------------------------------


Log Entry : 14:34:57 2021年8月16日 

次接驳盒断开！短信发送情况：短信数量不足

------------------------------------


Log Entry : 14:34:59 2021年8月16日 

次接驳盒断开！短信发送情况：短信数量不足

------------------------------------


Log Entry : 14:35:00 2021年8月16日 

次接驳盒断开！短信发送情况：短信数量不足

------------------------------------


Log Entry : 14:35:01 2021年8月16日 

次接驳盒断开！短信发送情况：短信数量不足

------------------------------------


Log Entry : 14:35:02 2021年8月16日 

次接驳盒断开！短信发送情况：短信数量不足

------------------------------------


Log Entry : 14:35:03 2021年8月16日 

次接驳盒断开！短信发送情况：短信数量不足

------------------------------------


Log Entry : 14:35:32 2021年8月16日 

次接驳盒断开！短信发送情况：短信数量不足

------------------------------------


Log Entry : 14:35:36 2021年8月16日 

次接驳盒断开！短信发送情况：短信数量不足

------------------------------------


Log Entry : 14:35:37 2021年8月16日 

次接驳盒断开！短信发送情况：短信数量不足

------------------------------------


Log Entry : 14:35:39 2021年8月16日 

次接驳盒断开！短信发送情况：短信数量不足

------------------------------------


Log Entry : 14:35:40 2021年8月16日 

次接驳盒断开！短信发送情况：短信数量不足

------------------------------------


Log Entry : 14:35:41 2021年8月16日 

次接驳盒断开！短信发送情况：短信数量不足

------------------------------------


Log Entry : 14:35:42 2021年8月16日 

次接驳盒断开！短信发送情况：短信数量不足

------------------------------------


Log Entry : 14:35:43 2021年8月16日 

次接驳盒断开！短信发送情况：短信数量不足

------------------------------------


Log Entry : 14:35:44 2021年8月16日 

次接驳盒断开！短信发送情况：短信数量不足

------------------------------------


Log Entry : 14:35:45 2021年8月16日 

次接驳盒断开！短信发送情况：短信数量不足

------------------------------------


Log Entry : 14:35:46 2021年8月16日 

次接驳盒断开！短信发送情况：短信数量不足

------------------------------------


Log Entry : 14:35:47 2021年8月16日 

次接驳盒断开！短信发送情况：短信数量不足

------------------------------------


Log Entry : 14:35:49 2021年8月16日 

次接驳盒断开！短信发送情况：短信数量不足

------------------------------------


Log Entry : 14:35:50 2021年8月16日 

次接驳盒断开！短信发送情况：短信数量不足

------------------------------------


Log Entry : 14:35:51 2021年8月16日 

次接驳盒断开！短信发送情况：短信数量不足

------------------------------------


Log Entry : 14:35:52 2021年8月16日 

次接驳盒断开！短信发送情况：短信数量不足

------------------------------------


Log Entry : 14:35:53 2021年8月16日 

次接驳盒断开！短信发送情况：短信数量不足

------------------------------------


Log Entry : 14:35:54 2021年8月16日 

次接驳盒断开！短信发送情况：短信数量不足

------------------------------------


Log Entry : 14:35:55 2021年8月16日 

次接驳盒断开！短信发送情况：短信数量不足

------------------------------------


Log Entry : 14:35:56 2021年8月16日 

次接驳盒断开！短信发送情况：短信数量不足

------------------------------------


Log Entry : 14:35:57 2021年8月16日 

次接驳盒断开！短信发送情况：短信数量不足

------------------------------------


Log Entry : 14:35:59 2021年8月16日 

次接驳盒断开！短信发送情况：短信数量不足

------------------------------------


Log Entry : 14:36:00 2021年8月16日 

次接驳盒断开！短信发送情况：短信数量不足

------------------------------------


Log Entry : 14:36:01 2021年8月16日 

次接驳盒断开！短信发送情况：短信数量不足

------------------------------------


Log Entry : 14:36:02 2021年8月16日 

次接驳盒断开！短信发送情况：短信数量不足

------------------------------------


Log Entry : 14:36:03 2021年8月16日 

次接驳盒断开！短信发送情况：短信数量不足

------------------------------------


Log Entry : 14:36:04 2021年8月16日 

次接驳盒断开！短信发送情况：短信数量不足

------------------------------------


Log Entry : 14:36:05 2021年8月16日 

次接驳盒断开！短信发送情况：短信数量不足

------------------------------------


Log Entry : 14:36:06 2021年8月16日 

次接驳盒断开！短信发送情况：短信数量不足

------------------------------------


Log Entry : 14:36:08 2021年8月16日 

次接驳盒断开！短信发送情况：短信数量不足

------------------------------------


Log Entry : 14:36:09 2021年8月16日 

次接驳盒断开！短信发送情况：短信数量不足

------------------------------------


Log Entry : 14:36:10 2021年8月16日 

次接驳盒断开！短信发送情况：短信数量不足

------------------------------------


Log Entry : 14:36:11 2021年8月16日 

次接驳盒断开！短信发送情况：短信数量不足

------------------------------------


Log Entry : 14:36:12 2021年8月16日 

次接驳盒断开！短信发送情况：短信数量不足

------------------------------------


Log Entry : 14:36:13 2021年8月16日 

次接驳盒断开！短信发送情况：短信数量不足

------------------------------------


Log Entry : 14:36:14 2021年8月16日 

次接驳盒断开！短信发送情况：短信数量不足

------------------------------------


Log Entry : 14:36:15 2021年8月16日 

次接驳盒断开！短信发送情况：短信数量不足

------------------------------------


Log Entry : 14:36:16 2021年8月16日 

次接驳盒断开！短信发送情况：短信数量不足

------------------------------------


Log Entry : 14:36:18 2021年8月16日 

次接驳盒断开！短信发送情况：短信数量不足

------------------------------------


Log Entry : 14:36:19 2021年8月16日 

次接驳盒断开！短信发送情况：短信数量不足

------------------------------------


Log Entry : 14:36:20 2021年8月16日 

次接驳盒断开！短信发送情况：短信数量不足

------------------------------------


Log Entry : 14:36:21 2021年8月16日 

次接驳盒断开！短信发送情况：短信数量不足

------------------------------------


Log Entry : 14:36:22 2021年8月16日 

次接驳盒断开！短信发送情况：短信数量不足

------------------------------------


Log Entry : 14:36:23 2021年8月16日 

次接驳盒断开！短信发送情况：短信数量不足

------------------------------------


Log Entry : 14:36:24 2021年8月16日 

次接驳盒断开！短信发送情况：短信数量不足

------------------------------------


Log Entry : 14:36:25 2021年8月16日 

次接驳盒断开！短信发送情况：短信数量不足

------------------------------------


Log Entry : 14:36:26 2021年8月16日 

次接驳盒断开！短信发送情况：短信数量不足

------------------------------------


Log Entry : 14:36:28 2021年8月16日 

次接驳盒断开！短信发送情况：短信数量不足

------------------------------------


Log Entry : 14:36:29 2021年8月16日 

次接驳盒断开！短信发送情况：短信数量不足

------------------------------------


Log Entry : 14:36:30 2021年8月16日 

次接驳盒断开！短信发送情况：短信数量不足

------------------------------------


Log Entry : 14:36:31 2021年8月16日 

次接驳盒断开！短信发送情况：短信数量不足

------------------------------------


Log Entry : 14:37:23 2021年8月16日 

次接驳盒断开！短信发送情况：短信数量不足

------------------------------------


Log Entry : 14:37:43 2021年8月16日 

次接驳盒断开！短信发送情况：短信数量不足

------------------------------------


Log Entry : 14:37:45 2021年8月16日 

次接驳盒断开！短信发送情况：短信数量不足

------------------------------------


Log Entry : 14:37:53 2021年8月16日 

次接驳盒断开！短信发送情况：短信数量不足

------------------------------------


Log Entry : 14:37:54 2021年8月16日 

次接驳盒断开！短信发送情况：短信数量不足

------------------------------------


Log Entry : 14:37:55 2021年8月16日 

次接驳盒断开！短信发送情况：短信数量不足

------------------------------------


Log Entry : 14:37:56 2021年8月16日 

次接驳盒断开！短信发送情况：短信数量不足

------------------------------------


Log Entry : 14:37:57 2021年8月16日 

次接驳盒断开！短信发送情况：短信数量不足

------------------------------------


Log Entry : 14:37:58 2021年8月16日 

次接驳盒断开！短信发送情况：短信数量不足

------------------------------------


Log Entry : 14:38:00 2021年8月16日 

次接驳盒断开！短信发送情况：短信数量不足

------------------------------------


Log Entry : 14:38:01 2021年8月16日 

次接驳盒断开！短信发送情况：短信数量不足

------------------------------------


Log Entry : 14:38:02 2021年8月16日 

次接驳盒断开！短信发送情况：短信数量不足

------------------------------------


Log Entry : 14:38:03 2021年8月16日 

次接驳盒断开！短信发送情况：短信数量不足

------------------------------------


Log Entry : 14:38:04 2021年8月16日 

次接驳盒断开！短信发送情况：短信数量不足

------------------------------------


Log Entry : 14:38:05 2021年8月16日 

次接驳盒断开！短信发送情况：短信数量不足

------------------------------------


Log Entry : 14:38:06 2021年8月16日 

次接驳盒断开！短信发送情况：短信数量不足

------------------------------------


Log Entry : 14:38:07 2021年8月16日 

次接驳盒断开！短信发送情况：短信数量不足

------------------------------------


Log Entry : 14:38:08 2021年8月16日 

次接驳盒断开！短信发送情况：短信数量不足

------------------------------------


Log Entry : 14:38:10 2021年8月16日 

次接驳盒断开！短信发送情况：短信数量不足

------------------------------------


Log Entry : 14:38:11 2021年8月16日 

次接驳盒断开！短信发送情况：短信数量不足

------------------------------------


Log Entry : 14:38:12 2021年8月16日 

次接驳盒断开！短信发送情况：短信数量不足

------------------------------------


Log Entry : 14:38:13 2021年8月16日 

次接驳盒断开！短信发送情况：短信数量不足

------------------------------------


Log Entry : 14:38:14 2021年8月16日 

次接驳盒断开！短信发送情况：短信数量不足

------------------------------------


Log Entry : 14:38:15 2021年8月16日 

次接驳盒断开！短信发送情况：短信数量不足

------------------------------------


Log Entry : 14:38:16 2021年8月16日 

次接驳盒断开！短信发送情况：短信数量不足

------------------------------------


Log Entry : 14:38:17 2021年8月16日 

次接驳盒断开！短信发送情况：短信数量不足

------------------------------------


Log Entry : 14:38:18 2021年8月16日 

次接驳盒断开！短信发送情况：短信数量不足

------------------------------------


Log Entry : 14:38:20 2021年8月16日 

次接驳盒断开！短信发送情况：短信数量不足

------------------------------------


Log Entry : 14:38:21 2021年8月16日 

次接驳盒断开！短信发送情况：短信数量不足

------------------------------------


Log Entry : 14:38:22 2021年8月16日 

次接驳盒断开！短信发送情况：短信数量不足

------------------------------------


Log Entry : 14:38:23 2021年8月16日 

次接驳盒断开！短信发送情况：短信数量不足

------------------------------------


Log Entry : 14:38:25 2021年8月16日 

次接驳盒断开！短信发送情况：短信数量不足

------------------------------------


Log Entry : 14:38:26 2021年8月16日 

次接驳盒断开！短信发送情况：短信数量不足

------------------------------------


Log Entry : 14:38:27 2021年8月16日 

次接驳盒断开！短信发送情况：短信数量不足

------------------------------------


Log Entry : 14:39:54 2021年8月16日 

次接驳盒断开！短信发送情况：短信数量不足

------------------------------------


Log Entry : 14:39:55 2021年8月16日 

次接驳盒断开！短信发送情况：短信数量不足

------------------------------------


Log Entry : 14:39:57 2021年8月16日 

次接驳盒断开！短信发送情况：短信数量不足

------------------------------------


Log Entry : 14:39:58 2021年8月16日 

次接驳盒断开！短信发送情况：短信数量不足

------------------------------------


Log Entry : 14:39:59 2021年8月16日 

次接驳盒断开！短信发送情况：短信数量不足

------------------------------------


Log Entry : 14:40:00 2021年8月16日 

次接驳盒断开！短信发送情况：短信数量不足

------------------------------------


Log Entry : 14:40:01 2021年8月16日 

次接驳盒断开！短信发送情况：短信数量不足

------------------------------------


Log Entry : 14:40:02 2021年8月16日 

次接驳盒断开！短信发送情况：短信数量不足

------------------------------------


Log Entry : 14:40:03 2021年8月16日 

次接驳盒断开！短信发送情况：短信数量不足

------------------------------------


Log Entry : 14:40:04 2021年8月16日 

次接驳盒断开！短信发送情况：短信数量不足

------------------------------------


Log Entry : 14:40:05 2021年8月16日 

次接驳盒断开！短信发送情况：短信数量不足

------------------------------------


Log Entry : 14:40:06 2021年8月16日 

次接驳盒断开！短信发送情况：短信数量不足

------------------------------------


Log Entry : 14:40:08 2021年8月16日 

次接驳盒断开！短信发送情况：短信数量不足

------------------------------------


Log Entry : 14:40:09 2021年8月16日 

次接驳盒断开！短信发送情况：短信数量不足

------------------------------------


Log Entry : 14:40:10 2021年8月16日 

次接驳盒断开！短信发送情况：短信数量不足

------------------------------------


Log Entry : 14:40:11 2021年8月16日 

次接驳盒断开！短信发送情况：短信数量不足

------------------------------------


Log Entry : 14:40:12 2021年8月16日 

次接驳盒断开！短信发送情况：短信数量不足

------------------------------------


Log Entry : 14:40:13 2021年8月16日 

次接驳盒断开！短信发送情况：短信数量不足

------------------------------------


Log Entry : 14:40:14 2021年8月16日 

次接驳盒断开！短信发送情况：短信数量不足

------------------------------------


Log Entry : 14:40:15 2021年8月16日 

次接驳盒断开！短信发送情况：短信数量不足

------------------------------------


Log Entry : 14:40:16 2021年8月16日 

次接驳盒断开！短信发送情况：短信数量不足

------------------------------------


Log Entry : 14:40:18 2021年8月16日 

次接驳盒断开！短信发送情况：短信数量不足

------------------------------------


Log Entry : 14:40:19 2021年8月16日 

次接驳盒断开！短信发送情况：短信数量不足

------------------------------------


Log Entry : 14:40:20 2021年8月16日 

次接驳盒断开！短信发送情况：短信数量不足

------------------------------------


Log Entry : 14:40:21 2021年8月16日 

次接驳盒断开！短信发送情况：短信数量不足

------------------------------------


Log Entry : 14:40:22 2021年8月16日 

次接驳盒断开！短信发送情况：短信数量不足

------------------------------------


Log Entry : 14:40:23 2021年8月16日 

次接驳盒断开！短信发送情况：短信数量不足

------------------------------------


Log Entry : 14:40:59 2021年8月16日 

次接驳盒断开！短信发送情况：短信数量不足

------------------------------------


Log Entry : 14:41:00 2021年8月16日 

次接驳盒断开！短信发送情况：短信数量不足

------------------------------------


Log Entry : 14:41:01 2021年8月16日 

次接驳盒断开！短信发送情况：短信数量不足

------------------------------------


Log Entry : 14:41:02 2021年8月16日 

次接驳盒断开！短信发送情况：短信数量不足

------------------------------------


Log Entry : 14:41:03 2021年8月16日 

次接驳盒断开！短信发送情况：短信数量不足

------------------------------------


Log Entry : 14:41:05 2021年8月16日 

次接驳盒断开！短信发送情况：短信数量不足

------------------------------------


Log Entry : 14:41:06 2021年8月16日 

次接驳盒断开！短信发送情况：短信数量不足

------------------------------------


Log Entry : 14:41:07 2021年8月16日 

次接驳盒断开！短信发送情况：短信数量不足

------------------------------------


Log Entry : 14:41:08 2021年8月16日 

次接驳盒断开！短信发送情况：短信数量不足

------------------------------------


Log Entry : 14:41:09 2021年8月16日 

次接驳盒断开！短信发送情况：短信数量不足

------------------------------------


Log Entry : 14:41:10 2021年8月16日 

次接驳盒断开！短信发送情况：短信数量不足

------------------------------------


Log Entry : 14:41:11 2021年8月16日 

次接驳盒断开！短信发送情况：短信数量不足

------------------------------------


Log Entry : 14:41:13 2021年8月16日 

次接驳盒断开！短信发送情况：短信数量不足

------------------------------------


Log Entry : 14:41:14 2021年8月16日 

次接驳盒断开！短信发送情况：短信数量不足

------------------------------------


Log Entry : 14:41:15 2021年8月16日 

次接驳盒断开！短信发送情况：短信数量不足

------------------------------------


Log Entry : 14:41:16 2021年8月16日 

次接驳盒断开！短信发送情况：短信数量不足

------------------------------------


Log Entry : 14:41:17 2021年8月16日 

次接驳盒断开！短信发送情况：短信数量不足

------------------------------------


Log Entry : 14:41:18 2021年8月16日 

次接驳盒断开！短信发送情况：短信数量不足

------------------------------------


Log Entry : 14:41:19 2021年8月16日 

次接驳盒断开！短信发送情况：短信数量不足

------------------------------------


Log Entry : 14:41:20 2021年8月16日 

次接驳盒断开！短信发送情况：短信数量不足

------------------------------------


Log Entry : 14:41:22 2021年8月16日 

次接驳盒断开！短信发送情况：短信数量不足

------------------------------------


Log Entry : 14:41:23 2021年8月16日 

次接驳盒断开！短信发送情况：短信数量不足

------------------------------------


Log Entry : 14:41:24 2021年8月16日 

次接驳盒断开！短信发送情况：短信数量不足

------------------------------------


Log Entry : 14:41:25 2021年8月16日 

次接驳盒断开！短信发送情况：短信数量不足

------------------------------------


Log Entry : 14:41:26 2021年8月16日 

次接驳盒断开！短信发送情况：短信数量不足

------------------------------------


Log Entry : 14:41:27 2021年8月16日 

次接驳盒断开！短信发送情况：短信数量不足

------------------------------------


Log Entry : 14:41:28 2021年8月16日 

次接驳盒断开！短信发送情况：短信数量不足

------------------------------------


Log Entry : 14:41:29 2021年8月16日 

次接驳盒断开！短信发送情况：短信数量不足

------------------------------------


Log Entry : 14:41:30 2021年8月16日 

次接驳盒断开！短信发送情况：短信数量不足

------------------------------------


Log Entry : 14:41:32 2021年8月16日 

次接驳盒断开！短信发送情况：短信数量不足

------------------------------------


Log Entry : 14:41:33 2021年8月16日 

次接驳盒断开！短信发送情况：短信数量不足

------------------------------------


Log Entry : 14:41:34 2021年8月16日 

次接驳盒断开！短信发送情况：短信数量不足

------------------------------------


Log Entry : 14:41:35 2021年8月16日 

次接驳盒断开！短信发送情况：短信数量不足

------------------------------------


Log Entry : 14:41:36 2021年8月16日 

次接驳盒断开！短信发送情况：短信数量不足

------------------------------------


Log Entry : 14:41:37 2021年8月16日 

次接驳盒断开！短信发送情况：短信数量不足

------------------------------------


Log Entry : 14:41:38 2021年8月16日 

次接驳盒断开！短信发送情况：短信数量不足

------------------------------------


Log Entry : 14:41:39 2021年8月16日 

次接驳盒断开！短信发送情况：短信数量不足

------------------------------------


Log Entry : 14:41:40 2021年8月16日 

次接驳盒断开！短信发送情况：短信数量不足

------------------------------------


Log Entry : 14:41:42 2021年8月16日 

次接驳盒断开！短信发送情况：短信数量不足

------------------------------------


Log Entry : 14:41:43 2021年8月16日 

次接驳盒断开！短信发送情况：短信数量不足

------------------------------------


Log Entry : 14:41:48 2021年8月16日 

次接驳盒断开！短信发送情况：短信数量不足

------------------------------------


Log Entry : 14:41:49 2021年8月16日 

次接驳盒断开！短信发送情况：短信数量不足

------------------------------------


Log Entry : 14:51:30 2021年8月16日 

次接驳盒断开！短信发送情况：短信数量不足

------------------------------------


Log Entry : 14:51:31 2021年8月16日 

次接驳盒断开！短信发送情况：短信数量不足

------------------------------------


Log Entry : 14:51:32 2021年8月16日 

次接驳盒断开！短信发送情况：短信数量不足

------------------------------------


Log Entry : 14:51:33 2021年8月16日 

次接驳盒断开！短信发送情况：短信数量不足

------------------------------------


Log Entry : 14:51:35 2021年8月16日 

次接驳盒断开！短信发送情况：短信数量不足

------------------------------------


Log Entry : 14:51:36 2021年8月16日 

次接驳盒断开！短信发送情况：短信数量不足

------------------------------------


Log Entry : 14:51:37 2021年8月16日 

次接驳盒断开！短信发送情况：短信数量不足

------------------------------------


Log Entry : 14:51:38 2021年8月16日 

次接驳盒断开！短信发送情况：短信数量不足

------------------------------------


Log Entry : 14:51:40 2021年8月16日 

次接驳盒断开！短信发送情况：短信数量不足

------------------------------------


Log Entry : 14:51:41 2021年8月16日 

次接驳盒断开！短信发送情况：短信数量不足

------------------------------------


Log Entry : 14:51:42 2021年8月16日 

次接驳盒断开！短信发送情况：短信数量不足

------------------------------------


Log Entry : 14:51:43 2021年8月16日 

次接驳盒断开！短信发送情况：短信数量不足

------------------------------------


Log Entry : 14:51:44 2021年8月16日 

次接驳盒断开！短信发送情况：短信数量不足

------------------------------------


Log Entry : 14:51:45 2021年8月16日 

次接驳盒断开！短信发送情况：短信数量不足

------------------------------------


Log Entry : 14:56:51 2021年8月16日 

次接驳盒断开！短信发送情况：短信数量不足

------------------------------------


Log Entry : 15:06:07 2021年8月16日 

次接驳盒断开！短信发送情况：短信数量不足

------------------------------------


Log Entry : 15:07:08 2021年8月16日 

主接驳盒断开！短信发送情况：短信数量不足

------------------------------------


Log Entry : 15:08:09 2021年8月16日 

主接驳盒断开！短信发送情况：短信数量不足

------------------------------------


Log Entry : 15:08:45 2021年8月16日 

次接驳盒断开！短信发送情况：短信数量不足

------------------------------------


Log Entry : 15:09:47 2021年8月16日 

主接驳盒断开！短信发送情况：短信数量不足

------------------------------------


Log Entry : 15:10:48 2021年8月16日 

主接驳盒断开！短信发送情况：短信数量不足

------------------------------------


Log Entry : 15:11:50 2021年8月16日 

主接驳盒断开！短信发送情况：短信数量不足

------------------------------------


Log Entry : 15:12:51 2021年8月16日 

主接驳盒断开！短信发送情况：短信数量不足

------------------------------------


Log Entry : 15:16:36 2021年8月16日 

数据采集器1断开！短信发送情况短信数量不足

------------------------------------


Log Entry : 15:16:36 2021年8月16日 

数据采集器1断开！短信发送情况短信数量不足

------------------------------------


Log Entry : 15:16:43 2021年8月16日 

次接驳盒断开！短信发送情况：短信数量不足

------------------------------------


Log Entry : 15:17:45 2021年8月16日 

主接驳盒断开！短信发送情况：短信数量不足

------------------------------------


Log Entry : 15:18:47 2021年8月16日 

主接驳盒断开！短信发送情况：短信数量不足

------------------------------------


Log Entry : 15:21:41 2021年8月16日 

主接驳盒断开！短信发送情况：短信数量不足

------------------------------------


Log Entry : 15:22:43 2021年8月16日 

主接驳盒断开！短信发送情况：短信数量不足

------------------------------------


Log Entry : 15:23:44 2021年8月16日 

主接驳盒断开！短信发送情况：短信数量不足

------------------------------------


Log Entry : 15:25:27 2021年8月16日 

数据采集器1断开！短信发送情况短信数量不足

------------------------------------


Log Entry : 15:25:27 2021年8月16日 

数据采集器1断开！短信发送情况短信数量不足

------------------------------------


Log Entry : 15:25:27 2021年8月16日 

数据采集器1断开！短信发送情况短信数量不足

------------------------------------


Log Entry : 15:25:27 2021年8月16日 

数据采集器1断开！短信发送情况短信数量不足

------------------------------------


Log Entry : 15:25:27 2021年8月16日 

数据采集器1断开！短信发送情况短信数量不足

------------------------------------


Log Entry : 15:26:27 2021年8月16日 

主接驳盒断开！短信发送情况：短信数量不足

------------------------------------


Log Entry : 15:26:53 2021年8月16日 

主接驳盒断开！短信发送情况：短信数量不足

------------------------------------


Log Entry : 15:26:54 2021年8月16日 

次接驳盒断开！短信发送情况：短信数量不足

------------------------------------


Log Entry : 15:26:54 2021年8月16日 

数据采集器1断开！短信发送情况短信数量不足

------------------------------------


Log Entry : 15:28:37 2021年8月16日 

数据采集器1断开！短信发送情况短信数量不足

------------------------------------


Log Entry : 15:28:37 2021年8月16日 

数据采集器1断开！短信发送情况短信数量不足

------------------------------------


Log Entry : 15:28:37 2021年8月16日 

数据采集器1断开！短信发送情况短信数量不足

------------------------------------


Log Entry : 15:28:37 2021年8月16日 

数据采集器1断开！短信发送情况短信数量不足

------------------------------------


Log Entry : 15:28:38 2021年8月16日 

数据采集器1断开！短信发送情况短信数量不足

------------------------------------


Log Entry : 15:28:38 2021年8月16日 

数据采集器1断开！短信发送情况短信数量不足

------------------------------------


Log Entry : 15:28:38 2021年8月16日 

数据采集器1断开！短信发送情况短信数量不足

------------------------------------


Log Entry : 15:28:38 2021年8月16日 

数据采集器1断开！短信发送情况短信数量不足

------------------------------------


Log Entry : 15:28:38 2021年8月16日 

数据采集器1断开！短信发送情况短信数量不足

------------------------------------


Log Entry : 15:28:38 2021年8月16日 

数据采集器1断开！短信发送情况短信数量不足

------------------------------------


Log Entry : 15:28:38 2021年8月16日 

数据采集器1断开！短信发送情况短信数量不足

------------------------------------


Log Entry : 15:28:38 2021年8月16日 

数据采集器1断开！短信发送情况短信数量不足

------------------------------------


Log Entry : 15:28:40 2021年8月16日 

数据采集器1断开！短信发送情况短信数量不足

------------------------------------


Log Entry : 15:28:40 2021年8月16日 

数据采集器1断开！短信发送情况短信数量不足

------------------------------------


Log Entry : 15:28:40 2021年8月16日 

数据采集器1断开！短信发送情况短信数量不足

------------------------------------


Log Entry : 15:28:40 2021年8月16日 

数据采集器1断开！短信发送情况短信数量不足

------------------------------------


Log Entry : 15:28:40 2021年8月16日 

数据采集器1断开！短信发送情况短信数量不足

------------------------------------


Log Entry : 15:28:40 2021年8月16日 

数据采集器1断开！短信发送情况短信数量不足

------------------------------------


Log Entry : 15:28:41 2021年8月16日 

数据采集器1断开！短信发送情况短信数量不足

------------------------------------


Log Entry : 15:29:36 2021年8月16日 

主接驳盒断开！短信发送情况：短信数量不足

------------------------------------


Log Entry : 15:30:38 2021年8月16日 

主接驳盒断开！短信发送情况：短信数量不足

------------------------------------


Log Entry : 15:32:08 2021年8月16日 

数据采集器1断开！短信发送情况短信数量不足

------------------------------------


Log Entry : 15:33:08 2021年8月16日 

主接驳盒断开！短信发送情况：短信数量不足

------------------------------------


Log Entry : 15:34:28 2021年8月16日 

主接驳盒断开！短信发送情况：短信数量不足

------------------------------------


Log Entry : 11:02:44 2021年9月27日 星期一 

次接驳盒断开！短信发送情况：短信数量不足

------------------------------------


Log Entry : 13:31:21 2021年9月27日 星期一 

次接驳盒断开！短信发送情况：短信数量不足

------------------------------------


Log Entry : 10:08:18 2021年10月4日 星期一 

次接驳盒断开！短信发送情况：短信数量不足

------------------------------------


Log Entry : 10:10:03 2021年10月4日 星期一 

次接驳盒断开！短信发送情况：短信数量不足

------------------------------------


Log Entry : 10:11:06 2021年10月4日 星期一 

次接驳盒断开！短信发送情况：短信数量不足

------------------------------------


Log Entry : 10:12:36 2021年10月4日 星期一 

次接驳盒断开！短信发送情况：短信数量不足

------------------------------------


Log Entry : 10:16:21 2021年10月4日 星期一 

次接驳盒断开！短信发送情况：短信数量不足

------------------------------------


Log Entry : 10:17:26 2021年10月4日 星期一 

次接驳盒断开！短信发送情况：短信数量不足

------------------------------------


Log Entry : 10:17:26 2021年10月4日 星期一 

次接驳盒断开！短信发送情况：短信数量不足

------------------------------------


Log Entry : 10:19:26 2021年10月4日 星期一 

次接驳盒断开！短信发送情况：短信数量不足

------------------------------------


Log Entry : 10:21:09 2021年10月4日 星期一 

次接驳盒断开！短信发送情况：短信数量不足

------------------------------------


Log Entry : 13:22:10 2021年10月4日 星期一 

次接驳盒断开！短信发送情况：短信数量不足

------------------------------------


Log Entry : 14:20:58 2021年10月4日 星期一 

次接驳盒断开！短信发送情况：短信数量不足

------------------------------------


Log Entry : 10:42:30 2022年4月15日 星期五 

次接驳盒断开！短信发送情况：短信数量不足

------------------------------------


Log Entry : 10:56:20 2022年4月15日 星期五 

次接驳盒断开！短信发送情况：短信数量不足

------------------------------------


Log Entry : 11:08:39 2022年4月15日 星期五 

次接驳盒断开！短信发送情况：短信数量不足

------------------------------------


Log Entry : 15:05:22 2022年4月15日 星期五 

次接驳盒断开！短信发送情况：短信数量不足

------------------------------------


Log Entry : 15:30:21 2022年4月15日 星期五 

次接驳盒断开！短信发送情况：短信数量不足

------------------------------------


Log Entry : 10:20:24 2022年4月27日 星期三 

主接驳盒断开！短信发送情况：短信数量不足

------------------------------------


Log Entry : 10:23:37 2022年4月27日 星期三 

主接驳盒断开！短信发送情况：短信数量不足

------------------------------------


Log Entry : 10:24:46 2022年4月27日 星期三 

主接驳盒断开！短信发送情况：短信数量不足

------------------------------------


Log Entry : 10:25:48 2022年4月27日 星期三 

主接驳盒断开！短信发送情况：短信数量不足

------------------------------------


Log Entry : 10:26:50 2022年4月27日 星期三 

主接驳盒断开！短信发送情况：短信数量不足

------------------------------------


Log Entry : 10:27:52 2022年4月27日 星期三 

主接驳盒断开！短信发送情况：短信数量不足

------------------------------------


Log Entry : 10:28:55 2022年4月27日 星期三 

主接驳盒断开！短信发送情况：短信数量不足

------------------------------------


Log Entry : 10:29:57 2022年4月27日 星期三 

主接驳盒断开！短信发送情况：短信数量不足

------------------------------------


Log Entry : 10:30:59 2022年4月27日 星期三 

主接驳盒断开！短信发送情况：短信数量不足

------------------------------------


Log Entry : 10:32:02 2022年4月27日 星期三 

主接驳盒断开！短信发送情况：短信数量不足

------------------------------------


Log Entry : 10:33:04 2022年4月27日 星期三 

主接驳盒断开！短信发送情况：短信数量不足

------------------------------------


Log Entry : 10:34:06 2022年4月27日 星期三 

主接驳盒断开！短信发送情况：短信数量不足

------------------------------------


Log Entry : 10:35:09 2022年4月27日 星期三 

主接驳盒断开！短信发送情况：短信数量不足

------------------------------------


Log Entry : 10:36:11 2022年4月27日 星期三 

主接驳盒断开！短信发送情况：短信数量不足

------------------------------------


Log Entry : 10:37:13 2022年4月27日 星期三 

主接驳盒断开！短信发送情况：短信数量不足

------------------------------------


Log Entry : 10:38:16 2022年4月27日 星期三 

主接驳盒断开！短信发送情况：短信数量不足

------------------------------------


Log Entry : 10:39:18 2022年4月27日 星期三 

主接驳盒断开！短信发送情况：短信数量不足

------------------------------------


Log Entry : 10:40:20 2022年4月27日 星期三 

主接驳盒断开！短信发送情况：短信数量不足

------------------------------------


Log Entry : 10:41:23 2022年4月27日 星期三 

主接驳盒断开！短信发送情况：短信数量不足

------------------------------------


Log Entry : 10:42:25 2022年4月27日 星期三 

主接驳盒断开！短信发送情况：短信数量不足

------------------------------------


Log Entry : 10:43:28 2022年4月27日 星期三 

主接驳盒断开！短信发送情况：短信数量不足

------------------------------------


Log Entry : 10:44:30 2022年4月27日 星期三 

主接驳盒断开！短信发送情况：短信数量不足

------------------------------------


Log Entry : 10:45:32 2022年4月27日 星期三 

主接驳盒断开！短信发送情况：短信数量不足

------------------------------------


Log Entry : 10:46:35 2022年4月27日 星期三 

主接驳盒断开！短信发送情况：短信数量不足

------------------------------------


Log Entry : 10:47:37 2022年4月27日 星期三 

主接驳盒断开！短信发送情况：短信数量不足

------------------------------------


Log Entry : 10:48:39 2022年4月27日 星期三 

主接驳盒断开！短信发送情况：短信数量不足

------------------------------------


Log Entry : 10:49:42 2022年4月27日 星期三 

主接驳盒断开！短信发送情况：短信数量不足

------------------------------------


Log Entry : 10:50:44 2022年4月27日 星期三 

主接驳盒断开！短信发送情况：短信数量不足

------------------------------------


Log Entry : 10:51:47 2022年4月27日 星期三 

主接驳盒断开！短信发送情况：短信数量不足

------------------------------------


Log Entry : 10:52:49 2022年4月27日 星期三 

主接驳盒断开！短信发送情况：短信数量不足

------------------------------------


Log Entry : 10:53:51 2022年4月27日 星期三 

主接驳盒断开！短信发送情况：短信数量不足

------------------------------------


Log Entry : 10:54:40 2022年4月27日 星期三 

数据采集器1断开！短信发送情况短信数量不足

------------------------------------


Log Entry : 10:54:54 2022年4月27日 星期三 

主接驳盒断开！短信发送情况：短信数量不足

------------------------------------


Log Entry : 10:55:56 2022年4月27日 星期三 

主接驳盒断开！短信发送情况：短信数量不足

------------------------------------


Log Entry : 10:56:58 2022年4月27日 星期三 

主接驳盒断开！短信发送情况：短信数量不足

------------------------------------


Log Entry : 10:58:01 2022年4月27日 星期三 

主接驳盒断开！短信发送情况：短信数量不足

------------------------------------


Log Entry : 10:59:03 2022年4月27日 星期三 

主接驳盒断开！短信发送情况：短信数量不足

------------------------------------


Log Entry : 11:00:05 2022年4月27日 星期三 

主接驳盒断开！短信发送情况：短信数量不足

------------------------------------


Log Entry : 11:01:08 2022年4月27日 星期三 

主接驳盒断开！短信发送情况：短信数量不足

------------------------------------


Log Entry : 11:02:10 2022年4月27日 星期三 

主接驳盒断开！短信发送情况：短信数量不足

------------------------------------


Log Entry : 11:03:12 2022年4月27日 星期三 

主接驳盒断开！短信发送情况：短信数量不足

------------------------------------


Log Entry : 11:04:15 2022年4月27日 星期三 

主接驳盒断开！短信发送情况：短信数量不足

------------------------------------


Log Entry : 11:05:17 2022年4月27日 星期三 

主接驳盒断开！短信发送情况：短信数量不足

------------------------------------


Log Entry : 11:06:20 2022年4月27日 星期三 

主接驳盒断开！短信发送情况：短信数量不足

------------------------------------


Log Entry : 11:07:22 2022年4月27日 星期三 

主接驳盒断开！短信发送情况：短信数量不足

------------------------------------


Log Entry : 11:08:24 2022年4月27日 星期三 

主接驳盒断开！短信发送情况：短信数量不足

------------------------------------


Log Entry : 11:09:27 2022年4月27日 星期三 

主接驳盒断开！短信发送情况：短信数量不足

------------------------------------


Log Entry : 11:09:41 2022年4月27日 星期三 

数据采集器1断开！短信发送情况短信数量不足

------------------------------------


Log Entry : 11:09:53 2022年4月27日 星期三 

次接驳盒断开！短信发送情况：短信数量不足

------------------------------------


Log Entry : 11:22:00 2022年4月28日 

主接驳盒断开！短信发送情况：短信数量不足

------------------------------------


Log Entry : 11:23:02 2022年4月28日 

主接驳盒断开！短信发送情况：短信数量不足

------------------------------------


Log Entry : 11:24:04 2022年4月28日 

主接驳盒断开！短信发送情况：短信数量不足

------------------------------------


Log Entry : 11:25:11 2022年4月28日 

主接驳盒断开！短信发送情况：短信数量不足

------------------------------------


Log Entry : 11:26:13 2022年4月28日 

主接驳盒断开！短信发送情况：短信数量不足

------------------------------------


Log Entry : 11:27:15 2022年4月28日 

主接驳盒断开！短信发送情况：短信数量不足

------------------------------------


Log Entry : 11:28:17 2022年4月28日 

主接驳盒断开！短信发送情况：短信数量不足

------------------------------------


Log Entry : 11:29:20 2022年4月28日 

主接驳盒断开！短信发送情况：短信数量不足

------------------------------------


Log Entry : 11:30:22 2022年4月28日 

主接驳盒断开！短信发送情况：短信数量不足

------------------------------------


Log Entry : 11:31:25 2022年4月28日 

主接驳盒断开！短信发送情况：短信数量不足

------------------------------------


Log Entry : 11:32:27 2022年4月28日 

主接驳盒断开！短信发送情况：短信数量不足

------------------------------------


Log Entry : 11:33:30 2022年4月28日 

主接驳盒断开！短信发送情况：短信数量不足

------------------------------------


Log Entry : 11:34:32 2022年4月28日 

主接驳盒断开！短信发送情况：短信数量不足

------------------------------------


Log Entry : 11:35:30 2022年4月28日 

次接驳盒断开！短信发送情况：短信数量不足

------------------------------------


Log Entry : 11:35:35 2022年4月28日 

主接驳盒断开！短信发送情况：短信数量不足

------------------------------------


Log Entry : 13:22:47 2022年4月28日 

主接驳盒断开！短信发送情况：短信数量不足

------------------------------------


Log Entry : 13:23:48 2022年4月28日 

主接驳盒断开！短信发送情况：短信数量不足

------------------------------------


Log Entry : 13:24:50 2022年4月28日 

主接驳盒断开！短信发送情况：短信数量不足

------------------------------------


Log Entry : 13:25:53 2022年4月28日 

主接驳盒断开！短信发送情况：短信数量不足

------------------------------------


Log Entry : 13:26:55 2022年4月28日 

主接驳盒断开！短信发送情况：短信数量不足

------------------------------------


Log Entry : 13:27:58 2022年4月28日 

主接驳盒断开！短信发送情况：短信数量不足

------------------------------------


Log Entry : 13:30:37 2022年4月28日 

主接驳盒断开！短信发送情况：短信数量不足

------------------------------------


Log Entry : 13:31:38 2022年4月28日 

主接驳盒断开！短信发送情况：短信数量不足

------------------------------------


Log Entry : 13:32:40 2022年4月28日 

主接驳盒断开！短信发送情况：短信数量不足

------------------------------------


Log Entry : 13:33:42 2022年4月28日 

主接驳盒断开！短信发送情况：短信数量不足

------------------------------------


Log Entry : 14:43:29 2022年6月10日 

主接驳盒断开！短信发送情况：短信数量不足

------------------------------------


Log Entry : 14:44:31 2022年6月10日 

主接驳盒断开！短信发送情况：短信数量不足

------------------------------------


Log Entry : 14:45:33 2022年6月10日 

主接驳盒断开！短信发送情况：短信数量不足

------------------------------------


Log Entry : 14:46:35 2022年6月10日 

主接驳盒断开！短信发送情况：短信数量不足

------------------------------------


Log Entry : 14:47:38 2022年6月10日 

主接驳盒断开！短信发送情况：短信数量不足

------------------------------------


Log Entry : 14:48:40 2022年6月10日 

主接驳盒断开！短信发送情况：短信数量不足

------------------------------------


Log Entry : 14:49:43 2022年6月10日 

主接驳盒断开！短信发送情况：短信数量不足

------------------------------------


Log Entry : 14:50:45 2022年6月10日 

主接驳盒断开！短信发送情况：短信数量不足

------------------------------------


Log Entry : 14:51:47 2022年6月10日 

主接驳盒断开！短信发送情况：短信数量不足

------------------------------------


Log Entry : 14:52:49 2022年6月10日 

主接驳盒断开！短信发送情况：短信数量不足

------------------------------------


Log Entry : 14:53:52 2022年6月10日 

主接驳盒断开！短信发送情况：短信数量不足

------------------------------------


Log Entry : 14:54:54 2022年6月10日 

主接驳盒断开！短信发送情况：短信数量不足

------------------------------------


Log Entry : 14:55:57 2022年6月10日 

主接驳盒断开！短信发送情况：短信数量不足

------------------------------------


Log Entry : 14:56:59 2022年6月10日 

主接驳盒断开！短信发送情况：短信数量不足

------------------------------------


Log Entry : 14:58:01 2022年6月10日 

主接驳盒断开！短信发送情况：短信数量不足

------------------------------------


Log Entry : 14:59:04 2022年6月10日 

主接驳盒断开！短信发送情况：短信数量不足

------------------------------------


Log Entry : 15:00:06 2022年6月10日 

主接驳盒断开！短信发送情况：短信数量不足

------------------------------------


Log Entry : 15:01:08 2022年6月10日 

主接驳盒断开！短信发送情况：短信数量不足

------------------------------------


Log Entry : 15:02:11 2022年6月10日 

主接驳盒断开！短信发送情况：短信数量不足

------------------------------------


Log Entry : 15:03:13 2022年6月10日 

主接驳盒断开！短信发送情况：短信数量不足

------------------------------------


Log Entry : 15:04:15 2022年6月10日 

主接驳盒断开！短信发送情况：短信数量不足

------------------------------------


Log Entry : 15:05:18 2022年6月10日 

主接驳盒断开！短信发送情况：短信数量不足

------------------------------------


Log Entry : 15:06:21 2022年6月10日 

主接驳盒断开！短信发送情况：短信数量不足

------------------------------------


Log Entry : 15:07:24 2022年6月10日 

主接驳盒断开！短信发送情况：短信数量不足

------------------------------------


Log Entry : 15:08:25 2022年6月10日 

主接驳盒断开！短信发送情况：短信数量不足

------------------------------------


Log Entry : 15:09:27 2022年6月10日 

主接驳盒断开！短信发送情况：短信数量不足

------------------------------------


Log Entry : 15:10:30 2022年6月10日 

主接驳盒断开！短信发送情况：短信数量不足

------------------------------------


Log Entry : 15:11:32 2022年6月10日 

主接驳盒断开！短信发送情况：短信数量不足

------------------------------------


Log Entry : 15:12:35 2022年6月10日 

主接驳盒断开！短信发送情况：短信数量不足

------------------------------------


Log Entry : 15:13:37 2022年6月10日 

主接驳盒断开！短信发送情况：短信数量不足

------------------------------------


Log Entry : 15:14:39 2022年6月10日 

主接驳盒断开！短信发送情况：短信数量不足

------------------------------------


Log Entry : 15:15:41 2022年6月10日 

主接驳盒断开！短信发送情况：短信数量不足

------------------------------------


Log Entry : 15:16:44 2022年6月10日 

主接驳盒断开！短信发送情况：短信数量不足

------------------------------------


Log Entry : 15:17:48 2022年6月10日 

主接驳盒断开！短信发送情况：短信数量不足

------------------------------------


Log Entry : 15:18:49 2022年6月10日 

主接驳盒断开！短信发送情况：短信数量不足

------------------------------------


Log Entry : 15:19:51 2022年6月10日 

主接驳盒断开！短信发送情况：短信数量不足

------------------------------------


Log Entry : 15:20:53 2022年6月10日 

主接驳盒断开！短信发送情况：短信数量不足

------------------------------------


Log Entry : 15:21:56 2022年6月10日 

主接驳盒断开！短信发送情况：短信数量不足

------------------------------------


Log Entry : 15:22:58 2022年6月10日 

主接驳盒断开！短信发送情况：短信数量不足

------------------------------------


Log Entry : 15:24:00 2022年6月10日 

主接驳盒断开！短信发送情况：短信数量不足

------------------------------------


Log Entry : 15:25:03 2022年6月10日 

主接驳盒断开！短信发送情况：短信数量不足

------------------------------------


Log Entry : 15:26:05 2022年6月10日 

主接驳盒断开！短信发送情况：短信数量不足

------------------------------------


Log Entry : 15:27:07 2022年6月10日 

主接驳盒断开！短信发送情况：短信数量不足

------------------------------------


Log Entry : 15:28:10 2022年6月10日 

主接驳盒断开！短信发送情况：短信数量不足

------------------------------------


Log Entry : 15:29:12 2022年6月10日 

主接驳盒断开！短信发送情况：短信数量不足

------------------------------------


Log Entry : 15:30:15 2022年6月10日 

主接驳盒断开！短信发送情况：短信数量不足

------------------------------------


Log Entry : 15:31:17 2022年6月10日 

主接驳盒断开！短信发送情况：短信数量不足

------------------------------------


Log Entry : 15:35:58 2022年6月10日 

主接驳盒断开！短信发送情况：短信数量不足

------------------------------------


Log Entry : 15:36:59 2022年6月10日 

主接驳盒断开！短信发送情况：短信数量不足

------------------------------------


Log Entry : 15:38:01 2022年6月10日 

主接驳盒断开！短信发送情况：短信数量不足

------------------------------------


Log Entry : 15:39:03 2022年6月10日 

主接驳盒断开！短信发送情况：短信数量不足

------------------------------------


Log Entry : 15:40:06 2022年6月10日 

主接驳盒断开！短信发送情况：短信数量不足

------------------------------------


Log Entry : 15:41:08 2022年6月10日 

主接驳盒断开！短信发送情况：短信数量不足

------------------------------------


Log Entry : 15:42:11 2022年6月10日 

主接驳盒断开！短信发送情况：短信数量不足

------------------------------------


Log Entry : 15:43:13 2022年6月10日 

主接驳盒断开！短信发送情况：短信数量不足

------------------------------------


Log Entry : 15:44:15 2022年6月10日 

主接驳盒断开！短信发送情况：短信数量不足

------------------------------------


Log Entry : 15:45:18 2022年6月10日 

主接驳盒断开！短信发送情况：短信数量不足

------------------------------------


Log Entry : 15:51:34 2022年6月10日 

主接驳盒断开！短信发送情况：值不能为 null。
参数名: String

------------------------------------


Log Entry : 15:52:37 2022年6月10日 

主接驳盒断开！短信发送情况：短信数量不足

------------------------------------


Log Entry : 15:53:40 2022年6月10日 

主接驳盒断开！短信发送情况：短信数量不足

------------------------------------


Log Entry : 15:54:43 2022年6月10日 

主接驳盒断开！短信发送情况：短信数量不足

------------------------------------


Log Entry : 15:55:45 2022年6月10日 

主接驳盒断开！短信发送情况：短信数量不足

------------------------------------


Log Entry : 15:56:48 2022年6月10日 

主接驳盒断开！短信发送情况：短信数量不足

------------------------------------


Log Entry : 15:57:50 2022年6月10日 

主接驳盒断开！短信发送情况：短信数量不足

------------------------------------


Log Entry : 15:58:52 2022年6月10日 

主接驳盒断开！短信发送情况：短信数量不足

------------------------------------


Log Entry : 15:59:55 2022年6月10日 

主接驳盒断开！短信发送情况：短信数量不足

------------------------------------


Log Entry : 16:00:57 2022年6月10日 

主接驳盒断开！短信发送情况：短信数量不足

------------------------------------


Log Entry : 16:02:00 2022年6月10日 

主接驳盒断开！短信发送情况：短信数量不足

------------------------------------


Log Entry : 16:03:02 2022年6月10日 

主接驳盒断开！短信发送情况：短信数量不足

------------------------------------


Log Entry : 16:04:04 2022年6月10日 

主接驳盒断开！短信发送情况：短信数量不足

------------------------------------


Log Entry : 16:05:07 2022年6月10日 

主接驳盒断开！短信发送情况：短信数量不足

------------------------------------


Log Entry : 16:06:09 2022年6月10日 

主接驳盒断开！短信发送情况：短信数量不足

------------------------------------


Log Entry : 16:07:11 2022年6月10日 

主接驳盒断开！短信发送情况：短信数量不足

------------------------------------


Log Entry : 16:08:14 2022年6月10日 

主接驳盒断开！短信发送情况：短信数量不足

------------------------------------


Log Entry : 16:09:16 2022年6月10日 

主接驳盒断开！短信发送情况：短信数量不足

------------------------------------


Log Entry : 16:10:18 2022年6月10日 

主接驳盒断开！短信发送情况：短信数量不足

------------------------------------


Log Entry : 16:11:21 2022年6月10日 

主接驳盒断开！短信发送情况：短信数量不足

------------------------------------


Log Entry : 16:12:23 2022年6月10日 

主接驳盒断开！短信发送情况：短信数量不足

------------------------------------


Log Entry : 16:13:25 2022年6月10日 

主接驳盒断开！短信发送情况：短信数量不足

------------------------------------


Log Entry : 16:14:28 2022年6月10日 

主接驳盒断开！短信发送情况：短信数量不足

------------------------------------


Log Entry : 16:15:30 2022年6月10日 

主接驳盒断开！短信发送情况：短信数量不足

------------------------------------


Log Entry : 16:16:33 2022年6月10日 

主接驳盒断开！短信发送情况：短信数量不足

------------------------------------


Log Entry : 16:17:35 2022年6月10日 

主接驳盒断开！短信发送情况：短信数量不足

------------------------------------


Log Entry : 16:18:37 2022年6月10日 

主接驳盒断开！短信发送情况：短信数量不足

------------------------------------


Log Entry : 16:19:40 2022年6月10日 

主接驳盒断开！短信发送情况：短信数量不足

------------------------------------


Log Entry : 16:20:44 2022年6月10日 

主接驳盒断开！短信发送情况：短信数量不足

------------------------------------


Log Entry : 16:21:44 2022年6月10日 

主接驳盒断开！短信发送情况：短信数量不足

------------------------------------


Log Entry : 16:22:47 2022年6月10日 

主接驳盒断开！短信发送情况：短信数量不足

------------------------------------


Log Entry : 16:23:49 2022年6月10日 

主接驳盒断开！短信发送情况：短信数量不足

------------------------------------


Log Entry : 16:24:51 2022年6月10日 

主接驳盒断开！短信发送情况：短信数量不足

------------------------------------


Log Entry : 16:25:54 2022年6月10日 

主接驳盒断开！短信发送情况：短信数量不足

------------------------------------


Log Entry : 16:26:57 2022年6月10日 

主接驳盒断开！短信发送情况：短信数量不足

------------------------------------


Log Entry : 16:27:59 2022年6月10日 

主接驳盒断开！短信发送情况：短信数量不足

------------------------------------


Log Entry : 16:29:02 2022年6月10日 

主接驳盒断开！短信发送情况：短信数量不足

------------------------------------


Log Entry : 16:30:03 2022年6月10日 

主接驳盒断开！短信发送情况：短信数量不足

------------------------------------


Log Entry : 16:31:06 2022年6月10日 

主接驳盒断开！短信发送情况：短信数量不足

------------------------------------


Log Entry : 16:32:10 2022年6月10日 

主接驳盒断开！短信发送情况：短信数量不足

------------------------------------


Log Entry : 16:33:13 2022年6月10日 

主接驳盒断开！短信发送情况：短信数量不足

------------------------------------


Log Entry : 16:34:15 2022年6月10日 

主接驳盒断开！短信发送情况：短信数量不足

------------------------------------


Log Entry : 16:35:17 2022年6月10日 

主接驳盒断开！短信发送情况：短信数量不足

------------------------------------


Log Entry : 16:36:20 2022年6月10日 

主接驳盒断开！短信发送情况：短信数量不足

------------------------------------


Log Entry : 16:37:22 2022年6月10日 

主接驳盒断开！短信发送情况：短信数量不足

------------------------------------


Log Entry : 16:38:24 2022年6月10日 

主接驳盒断开！短信发送情况：短信数量不足

------------------------------------


Log Entry : 16:39:27 2022年6月10日 

主接驳盒断开！短信发送情况：短信数量不足

------------------------------------


Log Entry : 16:40:29 2022年6月10日 

主接驳盒断开！短信发送情况：短信数量不足

------------------------------------


Log Entry : 16:41:31 2022年6月10日 

主接驳盒断开！短信发送情况：短信数量不足

------------------------------------


Log Entry : 16:42:34 2022年6月10日 

主接驳盒断开！短信发送情况：短信数量不足

------------------------------------


Log Entry : 16:43:36 2022年6月10日 

主接驳盒断开！短信发送情况：短信数量不足

------------------------------------


Log Entry : 16:44:38 2022年6月10日 

主接驳盒断开！短信发送情况：短信数量不足

------------------------------------


Log Entry : 9:25:46 2022年6月13日 

主接驳盒断开！短信发送情况：短信数量不足

------------------------------------


Log Entry : 9:26:49 2022年6月13日 

主接驳盒断开！短信发送情况：短信数量不足

------------------------------------


Log Entry : 9:27:51 2022年6月13日 

主接驳盒断开！短信发送情况：短信数量不足

------------------------------------


Log Entry : 9:28:54 2022年6月13日 

主接驳盒断开！短信发送情况：短信数量不足

------------------------------------


Log Entry : 9:29:55 2022年6月13日 

主接驳盒断开！短信发送情况：短信数量不足

------------------------------------


Log Entry : 9:30:57 2022年6月13日 

主接驳盒断开！短信发送情况：短信数量不足

------------------------------------


Log Entry : 9:32:00 2022年6月13日 

主接驳盒断开！短信发送情况：短信数量不足

------------------------------------


Log Entry : 9:33:02 2022年6月13日 

主接驳盒断开！短信发送情况：短信数量不足

------------------------------------


Log Entry : 9:34:05 2022年6月13日 

主接驳盒断开！短信发送情况：短信数量不足

------------------------------------


Log Entry : 9:35:07 2022年6月13日 

主接驳盒断开！短信发送情况：短信数量不足

------------------------------------


Log Entry : 9:36:09 2022年6月13日 

主接驳盒断开！短信发送情况：短信数量不足

------------------------------------


Log Entry : 9:37:12 2022年6月13日 

主接驳盒断开！短信发送情况：短信数量不足

------------------------------------


Log Entry : 9:38:14 2022年6月13日 

主接驳盒断开！短信发送情况：短信数量不足

------------------------------------


Log Entry : 9:39:16 2022年6月13日 

主接驳盒断开！短信发送情况：短信数量不足

------------------------------------


Log Entry : 9:40:19 2022年6月13日 

主接驳盒断开！短信发送情况：短信数量不足

------------------------------------


Log Entry : 9:41:21 2022年6月13日 

主接驳盒断开！短信发送情况：短信数量不足

------------------------------------


Log Entry : 9:42:23 2022年6月13日 

主接驳盒断开！短信发送情况：短信数量不足

------------------------------------


Log Entry : 9:43:26 2022年6月13日 

主接驳盒断开！短信发送情况：短信数量不足

------------------------------------


Log Entry : 9:44:28 2022年6月13日 

主接驳盒断开！短信发送情况：短信数量不足

------------------------------------


Log Entry : 9:45:31 2022年6月13日 

主接驳盒断开！短信发送情况：短信数量不足

------------------------------------


Log Entry : 9:46:33 2022年6月13日 

主接驳盒断开！短信发送情况：短信数量不足

------------------------------------


Log Entry : 9:47:35 2022年6月13日 

主接驳盒断开！短信发送情况：短信数量不足

------------------------------------


Log Entry : 9:48:38 2022年6月13日 

主接驳盒断开！短信发送情况：短信数量不足

------------------------------------


Log Entry : 9:49:40 2022年6月13日 

主接驳盒断开！短信发送情况：短信数量不足

------------------------------------


Log Entry : 9:50:42 2022年6月13日 

主接驳盒断开！短信发送情况：短信数量不足

------------------------------------


Log Entry : 9:51:45 2022年6月13日 

主接驳盒断开！短信发送情况：短信数量不足

------------------------------------


Log Entry : 9:52:47 2022年6月13日 

主接驳盒断开！短信发送情况：短信数量不足

------------------------------------


Log Entry : 9:53:49 2022年6月13日 

主接驳盒断开！短信发送情况：短信数量不足

------------------------------------


Log Entry : 9:54:52 2022年6月13日 

主接驳盒断开！短信发送情况：短信数量不足

------------------------------------


Log Entry : 9:55:54 2022年6月13日 

主接驳盒断开！短信发送情况：短信数量不足

------------------------------------


Log Entry : 9:56:57 2022年6月13日 

主接驳盒断开！短信发送情况：短信数量不足

------------------------------------


Log Entry : 9:57:59 2022年6月13日 

主接驳盒断开！短信发送情况：短信数量不足

------------------------------------


Log Entry : 9:59:01 2022年6月13日 

主接驳盒断开！短信发送情况：短信数量不足

------------------------------------


Log Entry : 10:30:04 2022年6月13日 

主接驳盒断开！短信发送情况：值不能为 null。
参数名: String

------------------------------------


Log Entry : 10:30:09 2022年6月13日 

次接驳盒断开！短信发送情况：短信数量不足

------------------------------------


Log Entry : 10:31:07 2022年6月13日 

主接驳盒断开！短信发送情况：短信数量不足

------------------------------------


Log Entry : 10:32:09 2022年6月13日 

主接驳盒断开！短信发送情况：短信数量不足

------------------------------------


Log Entry : 10:33:11 2022年6月13日 

主接驳盒断开！短信发送情况：短信数量不足

------------------------------------


Log Entry : 10:34:13 2022年6月13日 

主接驳盒断开！短信发送情况：短信数量不足

------------------------------------


Log Entry : 10:35:16 2022年6月13日 

主接驳盒断开！短信发送情况：短信数量不足

------------------------------------


Log Entry : 10:36:19 2022年6月13日 

主接驳盒断开！短信发送情况：短信数量不足

------------------------------------


Log Entry : 10:38:11 2022年6月13日 

数据采集器1断开！短信发送情况值不能为 null。
参数名: String

------------------------------------


Log Entry : 10:38:23 2022年6月13日 

次接驳盒断开！短信发送情况：值不能为 null。
参数名: String

------------------------------------


Log Entry : 10:38:35 2022年6月13日 

主接驳盒断开！短信发送情况：值不能为 null。
参数名: String

------------------------------------


Log Entry : 10:39:02 2022年6月13日 

数据采集器1断开！短信发送情况值不能为 null。
参数名: String

------------------------------------


Log Entry : 10:39:14 2022年6月13日 

次接驳盒断开！短信发送情况：值不能为 null。
参数名: String

------------------------------------


Log Entry : 10:39:43 2022年6月13日 

数据采集器1断开！短信发送情况值不能为 null。
参数名: String

------------------------------------


Log Entry : 10:39:55 2022年6月13日 

主接驳盒断开！短信发送情况：值不能为 null。
参数名: String

------------------------------------


Log Entry : 10:40:07 2022年6月13日 

次接驳盒断开！短信发送情况：值不能为 null。
参数名: String

------------------------------------


Log Entry : 10:40:34 2022年6月13日 

数据采集器1断开！短信发送情况值不能为 null。
参数名: String

------------------------------------


Log Entry : 10:40:46 2022年6月13日 

次接驳盒断开！短信发送情况：值不能为 null。
参数名: String

------------------------------------


Log Entry : 10:41:13 2022年6月13日 

数据采集器1断开！短信发送情况值不能为 null。
参数名: String

------------------------------------


Log Entry : 10:41:25 2022年6月13日 

主接驳盒断开！短信发送情况：值不能为 null。
参数名: String

------------------------------------


Log Entry : 10:41:37 2022年6月13日 

次接驳盒断开！短信发送情况：值不能为 null。
参数名: String

------------------------------------


Log Entry : 10:42:05 2022年6月13日 

数据采集器1断开！短信发送情况值不能为 null。
参数名: String

------------------------------------


Log Entry : 10:42:17 2022年6月13日 

次接驳盒断开！短信发送情况：值不能为 null。
参数名: String

------------------------------------


Log Entry : 10:42:44 2022年6月13日 

数据采集器1断开！短信发送情况值不能为 null。
参数名: String

------------------------------------


Log Entry : 10:42:56 2022年6月13日 

主接驳盒断开！短信发送情况：值不能为 null。
参数名: String

------------------------------------


Log Entry : 10:43:08 2022年6月13日 

次接驳盒断开！短信发送情况：值不能为 null。
参数名: String

------------------------------------


Log Entry : 10:43:35 2022年6月13日 

数据采集器1断开！短信发送情况值不能为 null。
参数名: String

------------------------------------


Log Entry : 10:43:47 2022年6月13日 

次接驳盒断开！短信发送情况：值不能为 null。
参数名: String

------------------------------------


Log Entry : 10:44:14 2022年6月13日 

数据采集器1断开！短信发送情况值不能为 null。
参数名: String

------------------------------------


Log Entry : 10:44:26 2022年6月13日 

主接驳盒断开！短信发送情况：值不能为 null。
参数名: String

------------------------------------


Log Entry : 10:44:38 2022年6月13日 

次接驳盒断开！短信发送情况：值不能为 null。
参数名: String

------------------------------------


Log Entry : 10:45:05 2022年6月13日 

数据采集器1断开！短信发送情况值不能为 null。
参数名: String

------------------------------------


Log Entry : 10:45:17 2022年6月13日 

次接驳盒断开！短信发送情况：值不能为 null。
参数名: String

------------------------------------


Log Entry : 10:45:45 2022年6月13日 

数据采集器1断开！短信发送情况值不能为 null。
参数名: String

------------------------------------


Log Entry : 10:45:57 2022年6月13日 

主接驳盒断开！短信发送情况：值不能为 null。
参数名: String

------------------------------------


Log Entry : 10:46:09 2022年6月13日 

次接驳盒断开！短信发送情况：值不能为 null。
参数名: String

------------------------------------


Log Entry : 10:46:36 2022年6月13日 

数据采集器1断开！短信发送情况值不能为 null。
参数名: String

------------------------------------


Log Entry : 10:46:48 2022年6月13日 

次接驳盒断开！短信发送情况：值不能为 null。
参数名: String

------------------------------------


Log Entry : 10:47:15 2022年6月13日 

数据采集器1断开！短信发送情况值不能为 null。
参数名: String

------------------------------------


Log Entry : 10:47:27 2022年6月13日 

主接驳盒断开！短信发送情况：值不能为 null。
参数名: String

------------------------------------


Log Entry : 10:47:39 2022年6月13日 

次接驳盒断开！短信发送情况：值不能为 null。
参数名: String

------------------------------------


Log Entry : 10:48:06 2022年6月13日 

数据采集器1断开！短信发送情况值不能为 null。
参数名: String

------------------------------------


Log Entry : 10:48:18 2022年6月13日 

次接驳盒断开！短信发送情况：值不能为 null。
参数名: String

------------------------------------


Log Entry : 10:48:45 2022年6月13日 

数据采集器1断开！短信发送情况值不能为 null。
参数名: String

------------------------------------


Log Entry : 10:48:57 2022年6月13日 

主接驳盒断开！短信发送情况：值不能为 null。
参数名: String

------------------------------------


Log Entry : 10:49:09 2022年6月13日 

次接驳盒断开！短信发送情况：值不能为 null。
参数名: String

------------------------------------


Log Entry : 10:49:37 2022年6月13日 

数据采集器1断开！短信发送情况值不能为 null。
参数名: String

------------------------------------


Log Entry : 10:49:49 2022年6月13日 

次接驳盒断开！短信发送情况：值不能为 null。
参数名: String

------------------------------------


Log Entry : 10:50:16 2022年6月13日 

数据采集器1断开！短信发送情况值不能为 null。
参数名: String

------------------------------------


Log Entry : 10:50:28 2022年6月13日 

主接驳盒断开！短信发送情况：值不能为 null。
参数名: String

------------------------------------


Log Entry : 10:50:40 2022年6月13日 

次接驳盒断开！短信发送情况：值不能为 null。
参数名: String

------------------------------------


Log Entry : 10:51:07 2022年6月13日 

数据采集器1断开！短信发送情况值不能为 null。
参数名: String

------------------------------------


Log Entry : 10:51:19 2022年6月13日 

次接驳盒断开！短信发送情况：值不能为 null。
参数名: String

------------------------------------


Log Entry : 10:51:46 2022年6月13日 

数据采集器1断开！短信发送情况值不能为 null。
参数名: String

------------------------------------


Log Entry : 10:51:58 2022年6月13日 

主接驳盒断开！短信发送情况：值不能为 null。
参数名: String

------------------------------------


Log Entry : 10:52:10 2022年6月13日 

次接驳盒断开！短信发送情况：值不能为 null。
参数名: String

------------------------------------


Log Entry : 10:52:37 2022年6月13日 

数据采集器1断开！短信发送情况值不能为 null。
参数名: String

------------------------------------


Log Entry : 10:52:49 2022年6月13日 

次接驳盒断开！短信发送情况：值不能为 null。
参数名: String

------------------------------------


Log Entry : 10:53:17 2022年6月13日 

数据采集器1断开！短信发送情况值不能为 null。
参数名: String

------------------------------------


Log Entry : 10:53:29 2022年6月13日 

主接驳盒断开！短信发送情况：值不能为 null。
参数名: String

------------------------------------


Log Entry : 10:53:41 2022年6月13日 

次接驳盒断开！短信发送情况：值不能为 null。
参数名: String

------------------------------------


Log Entry : 10:54:08 2022年6月13日 

数据采集器1断开！短信发送情况值不能为 null。
参数名: String

------------------------------------


Log Entry : 10:54:20 2022年6月13日 

次接驳盒断开！短信发送情况：值不能为 null。
参数名: String

------------------------------------


Log Entry : 10:54:47 2022年6月13日 

数据采集器1断开！短信发送情况值不能为 null。
参数名: String

------------------------------------


Log Entry : 10:54:59 2022年6月13日 

主接驳盒断开！短信发送情况：值不能为 null。
参数名: String

------------------------------------


Log Entry : 10:55:11 2022年6月13日 

次接驳盒断开！短信发送情况：值不能为 null。
参数名: String

------------------------------------


Log Entry : 10:55:38 2022年6月13日 

数据采集器1断开！短信发送情况值不能为 null。
参数名: String

------------------------------------


Log Entry : 10:55:50 2022年6月13日 

次接驳盒断开！短信发送情况：值不能为 null。
参数名: String

------------------------------------


Log Entry : 10:56:18 2022年6月13日 

数据采集器1断开！短信发送情况值不能为 null。
参数名: String

------------------------------------


Log Entry : 10:56:30 2022年6月13日 

主接驳盒断开！短信发送情况：值不能为 null。
参数名: String

------------------------------------


Log Entry : 10:56:42 2022年6月13日 

次接驳盒断开！短信发送情况：值不能为 null。
参数名: String

------------------------------------


Log Entry : 10:57:09 2022年6月13日 

数据采集器1断开！短信发送情况值不能为 null。
参数名: String

------------------------------------


Log Entry : 10:57:21 2022年6月13日 

次接驳盒断开！短信发送情况：值不能为 null。
参数名: String

------------------------------------


Log Entry : 10:57:48 2022年6月13日 

数据采集器1断开！短信发送情况值不能为 null。
参数名: String

------------------------------------


Log Entry : 10:58:00 2022年6月13日 

主接驳盒断开！短信发送情况：值不能为 null。
参数名: String

------------------------------------


Log Entry : 10:58:12 2022年6月13日 

次接驳盒断开！短信发送情况：值不能为 null。
参数名: String

------------------------------------


Log Entry : 10:58:39 2022年6月13日 

数据采集器1断开！短信发送情况值不能为 null。
参数名: String

------------------------------------


Log Entry : 10:58:51 2022年6月13日 

次接驳盒断开！短信发送情况：值不能为 null。
参数名: String

------------------------------------


Log Entry : 10:59:18 2022年6月13日 

数据采集器1断开！短信发送情况值不能为 null。
参数名: String

------------------------------------


Log Entry : 10:59:31 2022年6月13日 

主接驳盒断开！短信发送情况：值不能为 null。
参数名: String

------------------------------------


Log Entry : 10:59:43 2022年6月13日 

次接驳盒断开！短信发送情况：值不能为 null。
参数名: String

------------------------------------


Log Entry : 11:00:10 2022年6月13日 

数据采集器1断开！短信发送情况值不能为 null。
参数名: String

------------------------------------


Log Entry : 11:00:22 2022年6月13日 

次接驳盒断开！短信发送情况：值不能为 null。
参数名: String

------------------------------------


Log Entry : 11:00:49 2022年6月13日 

数据采集器1断开！短信发送情况值不能为 null。
参数名: String

------------------------------------


Log Entry : 11:01:01 2022年6月13日 

主接驳盒断开！短信发送情况：值不能为 null。
参数名: String

------------------------------------


Log Entry : 11:01:13 2022年6月13日 

次接驳盒断开！短信发送情况：值不能为 null。
参数名: String

------------------------------------


Log Entry : 11:01:40 2022年6月13日 

数据采集器1断开！短信发送情况值不能为 null。
参数名: String

------------------------------------


Log Entry : 11:01:52 2022年6月13日 

次接驳盒断开！短信发送情况：值不能为 null。
参数名: String

------------------------------------


Log Entry : 11:02:19 2022年6月13日 

数据采集器1断开！短信发送情况值不能为 null。
参数名: String

------------------------------------


Log Entry : 11:02:31 2022年6月13日 

主接驳盒断开！短信发送情况：值不能为 null。
参数名: String

------------------------------------


Log Entry : 11:02:43 2022年6月13日 

次接驳盒断开！短信发送情况：值不能为 null。
参数名: String

------------------------------------


Log Entry : 11:03:11 2022年6月13日 

数据采集器1断开！短信发送情况值不能为 null。
参数名: String

------------------------------------


Log Entry : 11:03:23 2022年6月13日 

次接驳盒断开！短信发送情况：值不能为 null。
参数名: String

------------------------------------


Log Entry : 11:03:50 2022年6月13日 

数据采集器1断开！短信发送情况值不能为 null。
参数名: String

------------------------------------


Log Entry : 11:04:02 2022年6月13日 

主接驳盒断开！短信发送情况：值不能为 null。
参数名: String

------------------------------------


Log Entry : 11:04:14 2022年6月13日 

次接驳盒断开！短信发送情况：值不能为 null。
参数名: String

------------------------------------


Log Entry : 11:04:41 2022年6月13日 

数据采集器1断开！短信发送情况值不能为 null。
参数名: String

------------------------------------


Log Entry : 11:04:53 2022年6月13日 

次接驳盒断开！短信发送情况：值不能为 null。
参数名: String

------------------------------------


Log Entry : 11:05:20 2022年6月13日 

数据采集器1断开！短信发送情况值不能为 null。
参数名: String

------------------------------------


Log Entry : 11:05:32 2022年6月13日 

主接驳盒断开！短信发送情况：值不能为 null。
参数名: String

------------------------------------


Log Entry : 11:05:44 2022年6月13日 

次接驳盒断开！短信发送情况：值不能为 null。
参数名: String

------------------------------------


Log Entry : 11:06:12 2022年6月13日 

数据采集器1断开！短信发送情况值不能为 null。
参数名: String

------------------------------------


Log Entry : 11:06:24 2022年6月13日 

次接驳盒断开！短信发送情况：值不能为 null。
参数名: String

------------------------------------


Log Entry : 11:06:51 2022年6月13日 

数据采集器1断开！短信发送情况值不能为 null。
参数名: String

------------------------------------


Log Entry : 11:07:03 2022年6月13日 

主接驳盒断开！短信发送情况：值不能为 null。
参数名: String

------------------------------------


Log Entry : 11:07:15 2022年6月13日 

次接驳盒断开！短信发送情况：值不能为 null。
参数名: String

------------------------------------


Log Entry : 11:07:42 2022年6月13日 

数据采集器1断开！短信发送情况值不能为 null。
参数名: String

------------------------------------


Log Entry : 11:07:54 2022年6月13日 

次接驳盒断开！短信发送情况：值不能为 null。
参数名: String

------------------------------------


Log Entry : 11:08:21 2022年6月13日 

数据采集器1断开！短信发送情况值不能为 null。
参数名: String

------------------------------------


Log Entry : 11:08:33 2022年6月13日 

主接驳盒断开！短信发送情况：值不能为 null。
参数名: String

------------------------------------


Log Entry : 11:08:45 2022年6月13日 

次接驳盒断开！短信发送情况：值不能为 null。
参数名: String

------------------------------------


Log Entry : 11:09:12 2022年6月13日 

数据采集器1断开！短信发送情况值不能为 null。
参数名: String

------------------------------------


Log Entry : 11:09:24 2022年6月13日 

次接驳盒断开！短信发送情况：值不能为 null。
参数名: String

------------------------------------


Log Entry : 11:09:52 2022年6月13日 

数据采集器1断开！短信发送情况值不能为 null。
参数名: String

------------------------------------


Log Entry : 11:10:04 2022年6月13日 

主接驳盒断开！短信发送情况：值不能为 null。
参数名: String

------------------------------------


Log Entry : 11:10:16 2022年6月13日 

次接驳盒断开！短信发送情况：值不能为 null。
参数名: String

------------------------------------


Log Entry : 11:10:43 2022年6月13日 

数据采集器1断开！短信发送情况值不能为 null。
参数名: String

------------------------------------


Log Entry : 11:10:55 2022年6月13日 

次接驳盒断开！短信发送情况：值不能为 null。
参数名: String

------------------------------------


Log Entry : 11:11:22 2022年6月13日 

数据采集器1断开！短信发送情况值不能为 null。
参数名: String

------------------------------------


Log Entry : 11:11:34 2022年6月13日 

主接驳盒断开！短信发送情况：值不能为 null。
参数名: String

------------------------------------


Log Entry : 11:11:46 2022年6月13日 

次接驳盒断开！短信发送情况：值不能为 null。
参数名: String

------------------------------------


Log Entry : 11:12:13 2022年6月13日 

数据采集器1断开！短信发送情况值不能为 null。
参数名: String

------------------------------------


Log Entry : 11:12:25 2022年6月13日 

次接驳盒断开！短信发送情况：值不能为 null。
参数名: String

------------------------------------


Log Entry : 11:12:52 2022年6月13日 

数据采集器1断开！短信发送情况值不能为 null。
参数名: String

------------------------------------


Log Entry : 11:13:04 2022年6月13日 

主接驳盒断开！短信发送情况：值不能为 null。
参数名: String

------------------------------------


Log Entry : 11:13:17 2022年6月13日 

次接驳盒断开！短信发送情况：值不能为 null。
参数名: String

------------------------------------


Log Entry : 11:13:44 2022年6月13日 

数据采集器1断开！短信发送情况值不能为 null。
参数名: String

------------------------------------


Log Entry : 11:13:56 2022年6月13日 

次接驳盒断开！短信发送情况：值不能为 null。
参数名: String

------------------------------------


Log Entry : 11:14:23 2022年6月13日 

数据采集器1断开！短信发送情况值不能为 null。
参数名: String

------------------------------------


Log Entry : 11:14:35 2022年6月13日 

主接驳盒断开！短信发送情况：值不能为 null。
参数名: String

------------------------------------


Log Entry : 11:14:47 2022年6月13日 

次接驳盒断开！短信发送情况：值不能为 null。
参数名: String

------------------------------------


Log Entry : 11:15:14 2022年6月13日 

数据采集器1断开！短信发送情况值不能为 null。
参数名: String

------------------------------------


Log Entry : 11:15:26 2022年6月13日 

次接驳盒断开！短信发送情况：值不能为 null。
参数名: String

------------------------------------


Log Entry : 11:15:54 2022年6月13日 

数据采集器1断开！短信发送情况值不能为 null。
参数名: String

------------------------------------


Log Entry : 11:16:06 2022年6月13日 

主接驳盒断开！短信发送情况：值不能为 null。
参数名: String

------------------------------------


Log Entry : 11:16:18 2022年6月13日 

次接驳盒断开！短信发送情况：值不能为 null。
参数名: String

------------------------------------


Log Entry : 11:16:45 2022年6月13日 

数据采集器1断开！短信发送情况值不能为 null。
参数名: String

------------------------------------


Log Entry : 11:16:57 2022年6月13日 

次接驳盒断开！短信发送情况：值不能为 null。
参数名: String

------------------------------------


Log Entry : 11:17:24 2022年6月13日 

数据采集器1断开！短信发送情况值不能为 null。
参数名: String

------------------------------------


Log Entry : 11:17:36 2022年6月13日 

主接驳盒断开！短信发送情况：值不能为 null。
参数名: String

------------------------------------


Log Entry : 11:17:48 2022年6月13日 

次接驳盒断开！短信发送情况：值不能为 null。
参数名: String

------------------------------------


Log Entry : 11:18:15 2022年6月13日 

数据采集器1断开！短信发送情况值不能为 null。
参数名: String

------------------------------------


Log Entry : 11:18:27 2022年6月13日 

次接驳盒断开！短信发送情况：值不能为 null。
参数名: String

------------------------------------


Log Entry : 11:18:54 2022年6月13日 

数据采集器1断开！短信发送情况值不能为 null。
参数名: String

------------------------------------


Log Entry : 11:19:06 2022年6月13日 

主接驳盒断开！短信发送情况：值不能为 null。
参数名: String

------------------------------------


Log Entry : 11:19:21 2022年6月13日 

次接驳盒断开！短信发送情况：值不能为 null。
参数名: String

------------------------------------


Log Entry : 11:19:33 2022年6月13日 

数据采集器1断开！短信发送情况值不能为 null。
参数名: String

------------------------------------


Log Entry : 11:20:01 2022年6月13日 

次接驳盒断开！短信发送情况：值不能为 null。
参数名: String

------------------------------------


Log Entry : 11:20:13 2022年6月13日 

数据采集器1断开！短信发送情况值不能为 null。
参数名: String

------------------------------------


Log Entry : 11:20:25 2022年6月13日 

主接驳盒断开！短信发送情况：值不能为 null。
参数名: String

------------------------------------


Log Entry : 11:20:52 2022年6月13日 

数据采集器1断开！短信发送情况值不能为 null。
参数名: String

------------------------------------


Log Entry : 11:21:04 2022年6月13日 

次接驳盒断开！短信发送情况：值不能为 null。
参数名: String

------------------------------------


Log Entry : 11:21:18 2022年6月13日 

数据采集器1断开！短信发送情况值不能为 null。
参数名: String

------------------------------------


Log Entry : 11:21:33 2022年6月13日 

数据采集器1断开！短信发送情况值不能为 null。
参数名: String

------------------------------------


Log Entry : 11:21:45 2022年6月13日 

主接驳盒断开！短信发送情况：值不能为 null。
参数名: String

------------------------------------


Log Entry : 11:22:00 2022年6月13日 

次接驳盒断开！短信发送情况：值不能为 null。
参数名: String

------------------------------------


Log Entry : 11:22:13 2022年6月13日 

数据采集器1断开！短信发送情况值不能为 null。
参数名: String

------------------------------------


Log Entry : 11:22:40 2022年6月13日 

次接驳盒断开！短信发送情况：值不能为 null。
参数名: String

------------------------------------


Log Entry : 11:22:53 2022年6月13日 

数据采集器1断开！短信发送情况值不能为 null。
参数名: String

------------------------------------


Log Entry : 11:23:05 2022年6月13日 

主接驳盒断开！短信发送情况：值不能为 null。
参数名: String

------------------------------------


Log Entry : 11:23:32 2022年6月13日 

次接驳盒断开！短信发送情况：值不能为 null。
参数名: String

------------------------------------


Log Entry : 11:23:44 2022年6月13日 

数据采集器1断开！短信发送情况值不能为 null。
参数名: String

------------------------------------


Log Entry : 11:24:12 2022年6月13日 

次接驳盒断开！短信发送情况：值不能为 null。
参数名: String

------------------------------------


Log Entry : 11:24:24 2022年6月13日 

数据采集器1断开！短信发送情况值不能为 null。
参数名: String

------------------------------------


Log Entry : 11:24:36 2022年6月13日 

主接驳盒断开！短信发送情况：值不能为 null。
参数名: String

------------------------------------


Log Entry : 11:25:03 2022年6月13日 

数据采集器1断开！短信发送情况值不能为 null。
参数名: String

------------------------------------


Log Entry : 11:25:15 2022年6月13日 

次接驳盒断开！短信发送情况：值不能为 null。
参数名: String

------------------------------------


Log Entry : 11:25:42 2022年6月13日 

数据采集器1断开！短信发送情况值不能为 null。
参数名: String

------------------------------------


Log Entry : 11:25:54 2022年6月13日 

主接驳盒断开！短信发送情况：值不能为 null。
参数名: String

------------------------------------


Log Entry : 11:26:09 2022年6月13日 

次接驳盒断开！短信发送情况：值不能为 null。
参数名: String

------------------------------------


Log Entry : 11:26:21 2022年6月13日 

数据采集器1断开！短信发送情况值不能为 null。
参数名: String

------------------------------------


Log Entry : 11:26:48 2022年6月13日 

次接驳盒断开！短信发送情况：值不能为 null。
参数名: String

------------------------------------


Log Entry : 11:27:00 2022年6月13日 

数据采集器1断开！短信发送情况值不能为 null。
参数名: String

------------------------------------


Log Entry : 11:27:12 2022年6月13日 

主接驳盒断开！短信发送情况：值不能为 null。
参数名: String

------------------------------------


Log Entry : 11:27:39 2022年6月13日 

次接驳盒断开！短信发送情况：值不能为 null。
参数名: String

------------------------------------


Log Entry : 11:27:51 2022年6月13日 

数据采集器1断开！短信发送情况值不能为 null。
参数名: String

------------------------------------


Log Entry : 11:28:19 2022年6月13日 

次接驳盒断开！短信发送情况：值不能为 null。
参数名: String

------------------------------------


Log Entry : 11:28:31 2022年6月13日 

数据采集器1断开！短信发送情况值不能为 null。
参数名: String

------------------------------------


Log Entry : 11:28:43 2022年6月13日 

主接驳盒断开！短信发送情况：值不能为 null。
参数名: String

------------------------------------


Log Entry : 11:29:10 2022年6月13日 

数据采集器1断开！短信发送情况值不能为 null。
参数名: String

------------------------------------


Log Entry : 11:29:22 2022年6月13日 

次接驳盒断开！短信发送情况：值不能为 null。
参数名: String

------------------------------------


Log Entry : 11:29:50 2022年6月13日 

数据采集器1断开！短信发送情况值不能为 null。
参数名: String

------------------------------------


Log Entry : 11:30:02 2022年6月13日 

主接驳盒断开！短信发送情况：值不能为 null。
参数名: String

------------------------------------


Log Entry : 11:30:18 2022年6月13日 

次接驳盒断开！短信发送情况：值不能为 null。
参数名: String

------------------------------------


Log Entry : 11:30:45 2022年6月13日 

数据采集器1断开！短信发送情况值不能为 null。
参数名: String

------------------------------------


Log Entry : 11:30:57 2022年6月13日 

次接驳盒断开！短信发送情况：值不能为 null。
参数名: String

------------------------------------


Log Entry : 11:31:15 2022年6月13日 

主接驳盒断开！短信发送情况：值不能为 null。
参数名: String

------------------------------------


Log Entry : 11:31:27 2022年6月13日 

数据采集器1断开！短信发送情况值不能为 null。
参数名: String

------------------------------------


Log Entry : 11:31:42 2022年6月13日 

次接驳盒断开！短信发送情况：值不能为 null。
参数名: String

------------------------------------


Log Entry : 11:32:09 2022年6月13日 

数据采集器1断开！短信发送情况值不能为 null。
参数名: String

------------------------------------


Log Entry : 11:32:23 2022年6月13日 

次接驳盒断开！短信发送情况：值不能为 null。
参数名: String

------------------------------------


Log Entry : 11:32:40 2022年6月13日 

主接驳盒断开！短信发送情况：值不能为 null。
参数名: String

------------------------------------


Log Entry : 11:32:52 2022年6月13日 

数据采集器1断开！短信发送情况值不能为 null。
参数名: String

------------------------------------


Log Entry : 11:33:19 2022年6月13日 

次接驳盒断开！短信发送情况：值不能为 null。
参数名: String

------------------------------------


Log Entry : 11:33:46 2022年6月13日 

数据采集器1断开！短信发送情况值不能为 null。
参数名: String

------------------------------------


Log Entry : 11:33:58 2022年6月13日 

次接驳盒断开！短信发送情况：值不能为 null。
参数名: String

------------------------------------


Log Entry : 11:34:10 2022年6月13日 

主接驳盒断开！短信发送情况：值不能为 null。
参数名: String

------------------------------------


Log Entry : 11:34:37 2022年6月13日 

数据采集器1断开！短信发送情况值不能为 null。
参数名: String

------------------------------------


Log Entry : 11:34:49 2022年6月13日 

次接驳盒断开！短信发送情况：值不能为 null。
参数名: String

------------------------------------


Log Entry : 11:35:17 2022年6月13日 

数据采集器1断开！短信发送情况值不能为 null。
参数名: String

------------------------------------


Log Entry : 11:35:29 2022年6月13日 

次接驳盒断开！短信发送情况：值不能为 null。
参数名: String

------------------------------------


Log Entry : 11:35:41 2022年6月13日 

主接驳盒断开！短信发送情况：值不能为 null。
参数名: String

------------------------------------


Log Entry : 11:36:08 2022年6月13日 

数据采集器1断开！短信发送情况值不能为 null。
参数名: String

------------------------------------


Log Entry : 11:36:20 2022年6月13日 

次接驳盒断开！短信发送情况：值不能为 null。
参数名: String

------------------------------------


Log Entry : 11:36:47 2022年6月13日 

数据采集器1断开！短信发送情况值不能为 null。
参数名: String

------------------------------------


Log Entry : 11:36:59 2022年6月13日 

主接驳盒断开！短信发送情况：值不能为 null。
参数名: String

------------------------------------


Log Entry : 11:37:11 2022年6月13日 

次接驳盒断开！短信发送情况：值不能为 null。
参数名: String

------------------------------------


Log Entry : 11:37:38 2022年6月13日 

数据采集器1断开！短信发送情况值不能为 null。
参数名: String

------------------------------------


Log Entry : 11:37:50 2022年6月13日 

次接驳盒断开！短信发送情况：值不能为 null。
参数名: String

------------------------------------


Log Entry : 11:38:17 2022年6月13日 

数据采集器1断开！短信发送情况值不能为 null。
参数名: String

------------------------------------


Log Entry : 11:38:29 2022年6月13日 

主接驳盒断开！短信发送情况：值不能为 null。
参数名: String

------------------------------------


Log Entry : 11:38:41 2022年6月13日 

次接驳盒断开！短信发送情况：值不能为 null。
参数名: String

------------------------------------


Log Entry : 11:39:08 2022年6月13日 

数据采集器1断开！短信发送情况值不能为 null。
参数名: String

------------------------------------


Log Entry : 11:39:20 2022年6月13日 

次接驳盒断开！短信发送情况：值不能为 null。
参数名: String

------------------------------------


Log Entry : 11:39:32 2022年6月13日 

数据采集器1断开！短信发送情况值不能为 null。
参数名: String

------------------------------------


Log Entry : 11:39:47 2022年6月13日 

数据采集器1断开！短信发送情况值不能为 null。
参数名: String

------------------------------------


Log Entry : 11:40:00 2022年6月13日 

主接驳盒断开！短信发送情况：值不能为 null。
参数名: String

------------------------------------


Log Entry : 11:40:12 2022年6月13日 

次接驳盒断开！短信发送情况：值不能为 null。
参数名: String

------------------------------------


Log Entry : 11:40:39 2022年6月13日 

数据采集器1断开！短信发送情况值不能为 null。
参数名: String

------------------------------------


Log Entry : 11:40:51 2022年6月13日 

次接驳盒断开！短信发送情况：值不能为 null。
参数名: String

------------------------------------


Log Entry : 11:41:18 2022年6月13日 

数据采集器1断开！短信发送情况值不能为 null。
参数名: String

------------------------------------


Log Entry : 11:41:30 2022年6月13日 

主接驳盒断开！短信发送情况：值不能为 null。
参数名: String

------------------------------------


Log Entry : 11:41:42 2022年6月13日 

次接驳盒断开！短信发送情况：值不能为 null。
参数名: String

------------------------------------


Log Entry : 11:42:09 2022年6月13日 

数据采集器1断开！短信发送情况值不能为 null。
参数名: String

------------------------------------


Log Entry : 11:42:21 2022年6月13日 

次接驳盒断开！短信发送情况：值不能为 null。
参数名: String

------------------------------------


Log Entry : 11:42:48 2022年6月13日 

数据采集器1断开！短信发送情况值不能为 null。
参数名: String

------------------------------------


Log Entry : 11:43:01 2022年6月13日 

主接驳盒断开！短信发送情况：值不能为 null。
参数名: String

------------------------------------


Log Entry : 11:43:13 2022年6月13日 

次接驳盒断开！短信发送情况：值不能为 null。
参数名: String

------------------------------------


Log Entry : 11:43:40 2022年6月13日 

数据采集器1断开！短信发送情况值不能为 null。
参数名: String

------------------------------------


Log Entry : 11:43:52 2022年6月13日 

次接驳盒断开！短信发送情况：值不能为 null。
参数名: String

------------------------------------


Log Entry : 11:44:19 2022年6月13日 

数据采集器1断开！短信发送情况值不能为 null。
参数名: String

------------------------------------


Log Entry : 11:44:31 2022年6月13日 

主接驳盒断开！短信发送情况：值不能为 null。
参数名: String

------------------------------------


Log Entry : 11:44:43 2022年6月13日 

次接驳盒断开！短信发送情况：值不能为 null。
参数名: String

------------------------------------


Log Entry : 11:45:10 2022年6月13日 

数据采集器1断开！短信发送情况值不能为 null。
参数名: String

------------------------------------


Log Entry : 11:45:22 2022年6月13日 

次接驳盒断开！短信发送情况：值不能为 null。
参数名: String

------------------------------------


Log Entry : 11:45:34 2022年6月13日 

数据采集器1断开！短信发送情况值不能为 null。
参数名: String

------------------------------------


Log Entry : 11:45:49 2022年6月13日 

数据采集器1断开！短信发送情况值不能为 null。
参数名: String

------------------------------------


Log Entry : 11:46:01 2022年6月13日 

主接驳盒断开！短信发送情况：值不能为 null。
参数名: String

------------------------------------


Log Entry : 11:46:13 2022年6月13日 

次接驳盒断开！短信发送情况：值不能为 null。
参数名: String

------------------------------------


Log Entry : 11:46:40 2022年6月13日 

数据采集器1断开！短信发送情况值不能为 null。
参数名: String

------------------------------------


Log Entry : 11:46:52 2022年6月13日 

次接驳盒断开！短信发送情况：值不能为 null。
参数名: String

------------------------------------


Log Entry : 11:47:19 2022年6月13日 

数据采集器1断开！短信发送情况值不能为 null。
参数名: String

------------------------------------


Log Entry : 11:47:32 2022年6月13日 

主接驳盒断开！短信发送情况：值不能为 null。
参数名: String

------------------------------------


Log Entry : 11:47:44 2022年6月13日 

次接驳盒断开！短信发送情况：值不能为 null。
参数名: String

------------------------------------


Log Entry : 11:48:11 2022年6月13日 

数据采集器1断开！短信发送情况值不能为 null。
参数名: String

------------------------------------


Log Entry : 11:48:23 2022年6月13日 

次接驳盒断开！短信发送情况：值不能为 null。
参数名: String

------------------------------------


Log Entry : 11:48:50 2022年6月13日 

数据采集器1断开！短信发送情况值不能为 null。
参数名: String

------------------------------------


Log Entry : 11:49:02 2022年6月13日 

主接驳盒断开！短信发送情况：值不能为 null。
参数名: String

------------------------------------


Log Entry : 11:49:14 2022年6月13日 

次接驳盒断开！短信发送情况：值不能为 null。
参数名: String

------------------------------------


Log Entry : 11:49:41 2022年6月13日 

数据采集器1断开！短信发送情况值不能为 null。
参数名: String

------------------------------------


Log Entry : 11:49:53 2022年6月13日 

次接驳盒断开！短信发送情况：值不能为 null。
参数名: String

------------------------------------


Log Entry : 11:50:20 2022年6月13日 

数据采集器1断开！短信发送情况值不能为 null。
参数名: String

------------------------------------


Log Entry : 11:50:32 2022年6月13日 

主接驳盒断开！短信发送情况：值不能为 null。
参数名: String

------------------------------------


Log Entry : 11:50:44 2022年6月13日 

次接驳盒断开！短信发送情况：值不能为 null。
参数名: String

------------------------------------


Log Entry : 11:51:11 2022年6月13日 

数据采集器1断开！短信发送情况值不能为 null。
参数名: String

------------------------------------


Log Entry : 11:51:23 2022年6月13日 

次接驳盒断开！短信发送情况：值不能为 null。
参数名: String

------------------------------------


Log Entry : 11:51:50 2022年6月13日 

数据采集器1断开！短信发送情况值不能为 null。
参数名: String

------------------------------------


Log Entry : 11:52:02 2022年6月13日 

主接驳盒断开！短信发送情况：值不能为 null。
参数名: String

------------------------------------


Log Entry : 11:52:15 2022年6月13日 

次接驳盒断开！短信发送情况：值不能为 null。
参数名: String

------------------------------------


Log Entry : 11:52:42 2022年6月13日 

数据采集器1断开！短信发送情况值不能为 null。
参数名: String

------------------------------------


Log Entry : 11:52:54 2022年6月13日 

次接驳盒断开！短信发送情况：值不能为 null。
参数名: String

------------------------------------


Log Entry : 11:53:21 2022年6月13日 

数据采集器1断开！短信发送情况值不能为 null。
参数名: String

------------------------------------


Log Entry : 11:53:33 2022年6月13日 

主接驳盒断开！短信发送情况：值不能为 null。
参数名: String

------------------------------------


Log Entry : 11:53:45 2022年6月13日 

次接驳盒断开！短信发送情况：值不能为 null。
参数名: String

------------------------------------


Log Entry : 11:54:12 2022年6月13日 

数据采集器1断开！短信发送情况值不能为 null。
参数名: String

------------------------------------


Log Entry : 11:54:24 2022年6月13日 

次接驳盒断开！短信发送情况：值不能为 null。
参数名: String

------------------------------------


Log Entry : 11:54:51 2022年6月13日 

数据采集器1断开！短信发送情况值不能为 null。
参数名: String

------------------------------------


Log Entry : 11:55:03 2022年6月13日 

主接驳盒断开！短信发送情况：值不能为 null。
参数名: String

------------------------------------


Log Entry : 11:55:15 2022年6月13日 

次接驳盒断开！短信发送情况：值不能为 null。
参数名: String

------------------------------------


Log Entry : 11:55:43 2022年6月13日 

数据采集器1断开！短信发送情况值不能为 null。
参数名: String

------------------------------------


Log Entry : 11:55:55 2022年6月13日 

次接驳盒断开！短信发送情况：值不能为 null。
参数名: String

------------------------------------


Log Entry : 11:56:22 2022年6月13日 

数据采集器1断开！短信发送情况值不能为 null。
参数名: String

------------------------------------


Log Entry : 11:56:34 2022年6月13日 

主接驳盒断开！短信发送情况：值不能为 null。
参数名: String

------------------------------------


Log Entry : 11:56:46 2022年6月13日 

次接驳盒断开！短信发送情况：值不能为 null。
参数名: String

------------------------------------


Log Entry : 11:57:13 2022年6月13日 

数据采集器1断开！短信发送情况值不能为 null。
参数名: String

------------------------------------


Log Entry : 11:57:25 2022年6月13日 

次接驳盒断开！短信发送情况：值不能为 null。
参数名: String

------------------------------------


Log Entry : 11:57:52 2022年6月13日 

数据采集器1断开！短信发送情况值不能为 null。
参数名: String

------------------------------------


Log Entry : 11:58:04 2022年6月13日 

主接驳盒断开！短信发送情况：值不能为 null。
参数名: String

------------------------------------


Log Entry : 11:58:16 2022年6月13日 

次接驳盒断开！短信发送情况：值不能为 null。
参数名: String

------------------------------------


Log Entry : 11:58:43 2022年6月13日 

数据采集器1断开！短信发送情况值不能为 null。
参数名: String

------------------------------------


Log Entry : 11:58:55 2022年6月13日 

次接驳盒断开！短信发送情况：值不能为 null。
参数名: String

------------------------------------


Log Entry : 11:59:22 2022年6月13日 

数据采集器1断开！短信发送情况值不能为 null。
参数名: String

------------------------------------


Log Entry : 11:59:34 2022年6月13日 

主接驳盒断开！短信发送情况：值不能为 null。
参数名: String

------------------------------------


Log Entry : 11:59:46 2022年6月13日 

次接驳盒断开！短信发送情况：值不能为 null。
参数名: String

------------------------------------


Log Entry : 12:00:14 2022年6月13日 

数据采集器1断开！短信发送情况值不能为 null。
参数名: String

------------------------------------


Log Entry : 12:00:26 2022年6月13日 

次接驳盒断开！短信发送情况：值不能为 null。
参数名: String

------------------------------------


Log Entry : 12:00:53 2022年6月13日 

数据采集器1断开！短信发送情况值不能为 null。
参数名: String

------------------------------------


Log Entry : 12:01:05 2022年6月13日 

主接驳盒断开！短信发送情况：值不能为 null。
参数名: String

------------------------------------


Log Entry : 12:01:17 2022年6月13日 

次接驳盒断开！短信发送情况：值不能为 null。
参数名: String

------------------------------------


Log Entry : 12:01:44 2022年6月13日 

数据采集器1断开！短信发送情况值不能为 null。
参数名: String

------------------------------------


Log Entry : 12:01:56 2022年6月13日 

次接驳盒断开！短信发送情况：值不能为 null。
参数名: String

------------------------------------


Log Entry : 12:02:23 2022年6月13日 

数据采集器1断开！短信发送情况值不能为 null。
参数名: String

------------------------------------


Log Entry : 12:02:35 2022年6月13日 

主接驳盒断开！短信发送情况：值不能为 null。
参数名: String

------------------------------------


Log Entry : 12:02:47 2022年6月13日 

次接驳盒断开！短信发送情况：值不能为 null。
参数名: String

------------------------------------


Log Entry : 12:03:14 2022年6月13日 

数据采集器1断开！短信发送情况值不能为 null。
参数名: String

------------------------------------


Log Entry : 12:03:26 2022年6月13日 

次接驳盒断开！短信发送情况：值不能为 null。
参数名: String

------------------------------------


Log Entry : 12:03:53 2022年6月13日 

数据采集器1断开！短信发送情况值不能为 null。
参数名: String

------------------------------------


Log Entry : 12:04:05 2022年6月13日 

主接驳盒断开！短信发送情况：值不能为 null。
参数名: String

------------------------------------


Log Entry : 12:04:17 2022年6月13日 

次接驳盒断开！短信发送情况：值不能为 null。
参数名: String

------------------------------------


Log Entry : 12:04:44 2022年6月13日 

数据采集器1断开！短信发送情况值不能为 null。
参数名: String

------------------------------------


Log Entry : 12:04:56 2022年6月13日 

次接驳盒断开！短信发送情况：值不能为 null。
参数名: String

------------------------------------


Log Entry : 12:05:23 2022年6月13日 

数据采集器1断开！短信发送情况值不能为 null。
参数名: String

------------------------------------


Log Entry : 12:05:36 2022年6月13日 

主接驳盒断开！短信发送情况：值不能为 null。
参数名: String

------------------------------------


Log Entry : 12:05:48 2022年6月13日 

次接驳盒断开！短信发送情况：值不能为 null。
参数名: String

------------------------------------


Log Entry : 12:06:15 2022年6月13日 

数据采集器1断开！短信发送情况值不能为 null。
参数名: String

------------------------------------


Log Entry : 12:06:27 2022年6月13日 

次接驳盒断开！短信发送情况：值不能为 null。
参数名: String

------------------------------------


Log Entry : 12:06:54 2022年6月13日 

数据采集器1断开！短信发送情况值不能为 null。
参数名: String

------------------------------------


Log Entry : 12:07:06 2022年6月13日 

主接驳盒断开！短信发送情况：值不能为 null。
参数名: String

------------------------------------


Log Entry : 12:07:21 2022年6月13日 

次接驳盒断开！短信发送情况：值不能为 null。
参数名: String

------------------------------------


Log Entry : 12:07:33 2022年6月13日 

数据采集器1断开！短信发送情况值不能为 null。
参数名: String

------------------------------------


Log Entry : 12:08:00 2022年6月13日 

次接驳盒断开！短信发送情况：值不能为 null。
参数名: String

------------------------------------


Log Entry : 12:08:20 2022年6月13日 

主接驳盒断开！短信发送情况：值不能为 null。
参数名: String

------------------------------------


Log Entry : 12:08:32 2022年6月13日 

数据采集器1断开！短信发送情况值不能为 null。
参数名: String

------------------------------------


Log Entry : 12:08:47 2022年6月13日 

次接驳盒断开！短信发送情况：值不能为 null。
参数名: String

------------------------------------


Log Entry : 12:09:14 2022年6月13日 

数据采集器1断开！短信发送情况值不能为 null。
参数名: String

------------------------------------


Log Entry : 12:09:26 2022年6月13日 

次接驳盒断开！短信发送情况：值不能为 null。
参数名: String

------------------------------------


Log Entry : 12:09:45 2022年6月13日 

主接驳盒断开！短信发送情况：值不能为 null。
参数名: String

------------------------------------


Log Entry : 12:09:57 2022年6月13日 

数据采集器1断开！短信发送情况值不能为 null。
参数名: String

------------------------------------


Log Entry : 12:10:24 2022年6月13日 

次接驳盒断开！短信发送情况：值不能为 null。
参数名: String

------------------------------------


Log Entry : 12:10:36 2022年6月13日 

数据采集器1断开！短信发送情况值不能为 null。
参数名: String

------------------------------------


Log Entry : 12:11:03 2022年6月13日 

次接驳盒断开！短信发送情况：值不能为 null。
参数名: String

------------------------------------


Log Entry : 12:11:15 2022年6月13日 

数据采集器1断开！短信发送情况值不能为 null。
参数名: String

------------------------------------


Log Entry : 12:11:27 2022年6月13日 

主接驳盒断开！短信发送情况：值不能为 null。
参数名: String

------------------------------------


Log Entry : 12:11:54 2022年6月13日 

数据采集器1断开！短信发送情况值不能为 null。
参数名: String

------------------------------------


Log Entry : 12:12:06 2022年6月13日 

次接驳盒断开！短信发送情况：值不能为 null。
参数名: String

------------------------------------


Log Entry : 12:12:33 2022年6月13日 

数据采集器1断开！短信发送情况值不能为 null。
参数名: String

------------------------------------


Log Entry : 12:12:45 2022年6月13日 

主接驳盒断开！短信发送情况：值不能为 null。
参数名: String

------------------------------------


Log Entry : 12:13:00 2022年6月13日 

次接驳盒断开！短信发送情况：值不能为 null。
参数名: String

------------------------------------


Log Entry : 12:13:12 2022年6月13日 

数据采集器1断开！短信发送情况值不能为 null。
参数名: String

------------------------------------


Log Entry : 12:13:40 2022年6月13日 

次接驳盒断开！短信发送情况：值不能为 null。
参数名: String

------------------------------------


Log Entry : 12:13:52 2022年6月13日 

数据采集器1断开！短信发送情况值不能为 null。
参数名: String

------------------------------------


Log Entry : 12:14:04 2022年6月13日 

主接驳盒断开！短信发送情况：值不能为 null。
参数名: String

------------------------------------


Log Entry : 12:14:31 2022年6月13日 

数据采集器1断开！短信发送情况值不能为 null。
参数名: String

------------------------------------


Log Entry : 12:14:43 2022年6月13日 

次接驳盒断开！短信发送情况：值不能为 null。
参数名: String

------------------------------------


Log Entry : 12:15:10 2022年6月13日 

数据采集器1断开！短信发送情况值不能为 null。
参数名: String

------------------------------------


Log Entry : 12:15:22 2022年6月13日 

主接驳盒断开！短信发送情况：值不能为 null。
参数名: String

------------------------------------


Log Entry : 12:15:37 2022年6月13日 

次接驳盒断开！短信发送情况：值不能为 null。
参数名: String

------------------------------------


Log Entry : 12:15:49 2022年6月13日 

数据采集器1断开！短信发送情况值不能为 null。
参数名: String

------------------------------------


Log Entry : 12:16:16 2022年6月13日 

次接驳盒断开！短信发送情况：值不能为 null。
参数名: String

------------------------------------


Log Entry : 12:16:30 2022年6月13日 

数据采集器1断开！短信发送情况值不能为 null。
参数名: String

------------------------------------


Log Entry : 12:16:43 2022年6月13日 

主接驳盒断开！短信发送情况：值不能为 null。
参数名: String

------------------------------------


Log Entry : 12:17:10 2022年6月13日 

次接驳盒断开！短信发送情况：值不能为 null。
参数名: String

------------------------------------


Log Entry : 12:17:22 2022年6月13日 

数据采集器1断开！短信发送情况值不能为 null。
参数名: String

------------------------------------


Log Entry : 12:17:49 2022年6月13日 

次接驳盒断开！短信发送情况：值不能为 null。
参数名: String

------------------------------------


Log Entry : 12:18:01 2022年6月13日 

数据采集器1断开！短信发送情况值不能为 null。
参数名: String

------------------------------------


Log Entry : 12:18:13 2022年6月13日 

主接驳盒断开！短信发送情况：值不能为 null。
参数名: String

------------------------------------


Log Entry : 12:18:40 2022年6月13日 

数据采集器1断开！短信发送情况值不能为 null。
参数名: String

------------------------------------


Log Entry : 12:18:52 2022年6月13日 

次接驳盒断开！短信发送情况：值不能为 null。
参数名: String

------------------------------------


Log Entry : 12:19:19 2022年6月13日 

数据采集器1断开！短信发送情况值不能为 null。
参数名: String

------------------------------------


Log Entry : 12:19:31 2022年6月13日 

主接驳盒断开！短信发送情况：值不能为 null。
参数名: String

------------------------------------


Log Entry : 12:19:46 2022年6月13日 

次接驳盒断开！短信发送情况：值不能为 null。
参数名: String

------------------------------------


Log Entry : 12:19:58 2022年6月13日 

数据采集器1断开！短信发送情况值不能为 null。
参数名: String

------------------------------------


Log Entry : 12:20:25 2022年6月13日 

次接驳盒断开！短信发送情况：值不能为 null。
参数名: String

------------------------------------


Log Entry : 12:20:37 2022年6月13日 

数据采集器1断开！短信发送情况值不能为 null。
参数名: String

------------------------------------


Log Entry : 12:20:49 2022年6月13日 

主接驳盒断开！短信发送情况：值不能为 null。
参数名: String

------------------------------------


Log Entry : 12:21:16 2022年6月13日 

数据采集器1断开！短信发送情况值不能为 null。
参数名: String

------------------------------------


Log Entry : 12:21:29 2022年6月13日 

次接驳盒断开！短信发送情况：值不能为 null。
参数名: String

------------------------------------


Log Entry : 12:21:56 2022年6月13日 

数据采集器1断开！短信发送情况值不能为 null。
参数名: String

------------------------------------


Log Entry : 12:22:08 2022年6月13日 

主接驳盒断开！短信发送情况：值不能为 null。
参数名: String

------------------------------------


Log Entry : 12:22:23 2022年6月13日 

次接驳盒断开！短信发送情况：值不能为 null。
参数名: String

------------------------------------


Log Entry : 12:22:35 2022年6月13日 

数据采集器1断开！短信发送情况值不能为 null。
参数名: String

------------------------------------


Log Entry : 12:23:02 2022年6月13日 

次接驳盒断开！短信发送情况：值不能为 null。
参数名: String

------------------------------------


Log Entry : 12:23:14 2022年6月13日 

数据采集器1断开！短信发送情况值不能为 null。
参数名: String

------------------------------------


Log Entry : 12:23:26 2022年6月13日 

主接驳盒断开！短信发送情况：值不能为 null。
参数名: String

------------------------------------


Log Entry : 12:23:53 2022年6月13日 

次接驳盒断开！短信发送情况：值不能为 null。
参数名: String

------------------------------------


Log Entry : 12:24:05 2022年6月13日 

数据采集器1断开！短信发送情况值不能为 null。
参数名: String

------------------------------------


Log Entry : 12:24:32 2022年6月13日 

次接驳盒断开！短信发送情况：值不能为 null。
参数名: String

------------------------------------


Log Entry : 12:24:44 2022年6月13日 

数据采集器1断开！短信发送情况值不能为 null。
参数名: String

------------------------------------


Log Entry : 12:24:56 2022年6月13日 

主接驳盒断开！短信发送情况：值不能为 null。
参数名: String

------------------------------------


Log Entry : 12:25:23 2022年6月13日 

数据采集器1断开！短信发送情况值不能为 null。
参数名: String

------------------------------------


Log Entry : 12:25:36 2022年6月13日 

次接驳盒断开！短信发送情况：值不能为 null。
参数名: String

------------------------------------


Log Entry : 12:26:03 2022年6月13日 

数据采集器1断开！短信发送情况值不能为 null。
参数名: String

------------------------------------


Log Entry : 12:26:15 2022年6月13日 

次接驳盒断开！短信发送情况：值不能为 null。
参数名: String

------------------------------------


Log Entry : 12:26:27 2022年6月13日 

主接驳盒断开！短信发送情况：值不能为 null。
参数名: String

------------------------------------


Log Entry : 12:26:54 2022年6月13日 

次接驳盒断开！短信发送情况：值不能为 null。
参数名: String

------------------------------------


Log Entry : 12:27:06 2022年6月13日 

数据采集器1断开！短信发送情况值不能为 null。
参数名: String

------------------------------------


Log Entry : 12:27:34 2022年6月13日 

次接驳盒断开！短信发送情况：值不能为 null。
参数名: String

------------------------------------


Log Entry : 12:27:46 2022年6月13日 

主接驳盒断开！短信发送情况：值不能为 null。
参数名: String

------------------------------------


Log Entry : 12:28:13 2022年6月13日 

数据采集器1断开！短信发送情况值不能为 null。
参数名: String

------------------------------------


Log Entry : 12:28:25 2022年6月13日 

次接驳盒断开！短信发送情况：值不能为 null。
参数名: String

------------------------------------


Log Entry : 12:28:59 2022年6月13日 

主接驳盒断开！短信发送情况：值不能为 null。
参数名: String

------------------------------------


Log Entry : 12:29:11 2022年6月13日 

数据采集器1断开！短信发送情况值不能为 null。
参数名: String

------------------------------------


Log Entry : 12:29:23 2022年6月13日 

次接驳盒断开！短信发送情况：值不能为 null。
参数名: String

------------------------------------


Log Entry : 12:29:50 2022年6月13日 

数据采集器1断开！短信发送情况值不能为 null。
参数名: String

------------------------------------


Log Entry : 12:30:17 2022年6月13日 

次接驳盒断开！短信发送情况：值不能为 null。
参数名: String

------------------------------------


Log Entry : 12:30:32 2022年6月13日 

数据采集器1断开！短信发送情况值不能为 null。
参数名: String

------------------------------------


Log Entry : 12:30:44 2022年6月13日 

主接驳盒断开！短信发送情况：值不能为 null。
参数名: String

------------------------------------


Log Entry : 12:31:11 2022年6月13日 

次接驳盒断开！短信发送情况：值不能为 null。
参数名: String

------------------------------------


Log Entry : 12:31:23 2022年6月13日 

数据采集器1断开！短信发送情况值不能为 null。
参数名: String

------------------------------------


Log Entry : 12:31:50 2022年6月13日 

次接驳盒断开！短信发送情况：值不能为 null。
参数名: String

------------------------------------


Log Entry : 12:32:02 2022年6月13日 

数据采集器1断开！短信发送情况值不能为 null。
参数名: String

------------------------------------


Log Entry : 12:32:14 2022年6月13日 

主接驳盒断开！短信发送情况：值不能为 null。
参数名: String

------------------------------------


Log Entry : 12:32:41 2022年6月13日 

数据采集器1断开！短信发送情况值不能为 null。
参数名: String

------------------------------------


Log Entry : 12:32:53 2022年6月13日 

次接驳盒断开！短信发送情况：值不能为 null。
参数名: String

------------------------------------


Log Entry : 12:33:20 2022年6月13日 

数据采集器1断开！短信发送情况值不能为 null。
参数名: String

------------------------------------


Log Entry : 12:33:32 2022年6月13日 

主接驳盒断开！短信发送情况：值不能为 null。
参数名: String

------------------------------------


Log Entry : 12:33:47 2022年6月13日 

次接驳盒断开！短信发送情况：值不能为 null。
参数名: String

------------------------------------


Log Entry : 12:33:59 2022年6月13日 

数据采集器1断开！短信发送情况值不能为 null。
参数名: String

------------------------------------


Log Entry : 12:34:26 2022年6月13日 

次接驳盒断开！短信发送情况：值不能为 null。
参数名: String

------------------------------------


Log Entry : 12:34:39 2022年6月13日 

数据采集器1断开！短信发送情况值不能为 null。
参数名: String

------------------------------------


Log Entry : 12:34:51 2022年6月13日 

主接驳盒断开！短信发送情况：值不能为 null。
参数名: String

------------------------------------


Log Entry : 12:35:18 2022年6月13日 

数据采集器1断开！短信发送情况值不能为 null。
参数名: String

------------------------------------


Log Entry : 12:35:30 2022年6月13日 

次接驳盒断开！短信发送情况：值不能为 null。
参数名: String

------------------------------------


Log Entry : 12:35:57 2022年6月13日 

数据采集器1断开！短信发送情况值不能为 null。
参数名: String

------------------------------------


Log Entry : 12:36:09 2022年6月13日 

主接驳盒断开！短信发送情况：值不能为 null。
参数名: String

------------------------------------


Log Entry : 12:36:24 2022年6月13日 

次接驳盒断开！短信发送情况：值不能为 null。
参数名: String

------------------------------------


Log Entry : 12:36:36 2022年6月13日 

数据采集器1断开！短信发送情况值不能为 null。
参数名: String

------------------------------------


Log Entry : 12:37:03 2022年6月13日 

次接驳盒断开！短信发送情况：值不能为 null。
参数名: String

------------------------------------


Log Entry : 12:37:17 2022年6月13日 

数据采集器1断开！短信发送情况值不能为 null。
参数名: String

------------------------------------


Log Entry : 12:37:29 2022年6月13日 

主接驳盒断开！短信发送情况：值不能为 null。
参数名: String

------------------------------------


Log Entry : 12:37:56 2022年6月13日 

次接驳盒断开！短信发送情况：值不能为 null。
参数名: String

------------------------------------


Log Entry : 12:38:08 2022年6月13日 

数据采集器1断开！短信发送情况值不能为 null。
参数名: String

------------------------------------


Log Entry : 12:38:35 2022年6月13日 

次接驳盒断开！短信发送情况：值不能为 null。
参数名: String

------------------------------------


Log Entry : 12:38:47 2022年6月13日 

数据采集器1断开！短信发送情况值不能为 null。
参数名: String

------------------------------------


Log Entry : 12:38:59 2022年6月13日 

主接驳盒断开！短信发送情况：值不能为 null。
参数名: String

------------------------------------


Log Entry : 12:39:27 2022年6月13日 

数据采集器1断开！短信发送情况值不能为 null。
参数名: String

------------------------------------


Log Entry : 12:39:39 2022年6月13日 

次接驳盒断开！短信发送情况：值不能为 null。
参数名: String

------------------------------------


Log Entry : 12:40:06 2022年6月13日 

数据采集器1断开！短信发送情况值不能为 null。
参数名: String

------------------------------------


Log Entry : 12:40:18 2022年6月13日 

主接驳盒断开！短信发送情况：值不能为 null。
参数名: String

------------------------------------


Log Entry : 12:40:33 2022年6月13日 

次接驳盒断开！短信发送情况：值不能为 null。
参数名: String

------------------------------------


Log Entry : 12:40:45 2022年6月13日 

数据采集器1断开！短信发送情况值不能为 null。
参数名: String

------------------------------------


Log Entry : 12:41:12 2022年6月13日 

次接驳盒断开！短信发送情况：值不能为 null。
参数名: String

------------------------------------


Log Entry : 12:41:24 2022年6月13日 

数据采集器1断开！短信发送情况值不能为 null。
参数名: String

------------------------------------


Log Entry : 12:41:36 2022年6月13日 

主接驳盒断开！短信发送情况：值不能为 null。
参数名: String

------------------------------------


Log Entry : 12:42:03 2022年6月13日 

次接驳盒断开！短信发送情况：值不能为 null。
参数名: String

------------------------------------


Log Entry : 12:42:15 2022年6月13日 

数据采集器1断开！短信发送情况值不能为 null。
参数名: String

------------------------------------


Log Entry : 12:42:42 2022年6月13日 

次接驳盒断开！短信发送情况：值不能为 null。
参数名: String

------------------------------------


Log Entry : 12:42:54 2022年6月13日 

主接驳盒断开！短信发送情况：值不能为 null。
参数名: String

------------------------------------


Log Entry : 12:43:21 2022年6月13日 

数据采集器1断开！短信发送情况值不能为 null。
参数名: String

------------------------------------


Log Entry : 12:43:33 2022年6月13日 

次接驳盒断开！短信发送情况：值不能为 null。
参数名: String

------------------------------------


Log Entry : 12:44:00 2022年6月13日 

数据采集器1断开！短信发送情况值不能为 null。
参数名: String

------------------------------------


Log Entry : 12:44:12 2022年6月13日 

主接驳盒断开！短信发送情况：值不能为 null。
参数名: String

------------------------------------


Log Entry : 12:44:24 2022年6月13日 

次接驳盒断开！短信发送情况：值不能为 null。
参数名: String

------------------------------------


Log Entry : 12:44:51 2022年6月13日 

数据采集器1断开！短信发送情况值不能为 null。
参数名: String

------------------------------------


Log Entry : 12:45:03 2022年6月13日 

次接驳盒断开！短信发送情况：值不能为 null。
参数名: String

------------------------------------


Log Entry : 12:45:31 2022年6月13日 

数据采集器1断开！短信发送情况值不能为 null。
参数名: String

------------------------------------


Log Entry : 12:45:43 2022年6月13日 

主接驳盒断开！短信发送情况：值不能为 null。
参数名: String

------------------------------------


Log Entry : 12:45:55 2022年6月13日 

次接驳盒断开！短信发送情况：值不能为 null。
参数名: String

------------------------------------


Log Entry : 12:46:22 2022年6月13日 

数据采集器1断开！短信发送情况值不能为 null。
参数名: String

------------------------------------


Log Entry : 12:46:34 2022年6月13日 

次接驳盒断开！短信发送情况：值不能为 null。
参数名: String

------------------------------------


Log Entry : 12:47:07 2022年6月13日 

数据采集器1断开！短信发送情况值不能为 null。
参数名: String

------------------------------------


Log Entry : 12:47:19 2022年6月13日 

主接驳盒断开！短信发送情况：值不能为 null。
参数名: String

------------------------------------


Log Entry : 12:47:31 2022年6月13日 

次接驳盒断开！短信发送情况：值不能为 null。
参数名: String

------------------------------------


Log Entry : 12:47:58 2022年6月13日 

数据采集器1断开！短信发送情况值不能为 null。
参数名: String

------------------------------------


Log Entry : 12:48:10 2022年6月13日 

次接驳盒断开！短信发送情况：值不能为 null。
参数名: String

------------------------------------


Log Entry : 12:48:37 2022年6月13日 

数据采集器1断开！短信发送情况值不能为 null。
参数名: String

------------------------------------


Log Entry : 12:48:50 2022年6月13日 

主接驳盒断开！短信发送情况：值不能为 null。
参数名: String

------------------------------------


Log Entry : 12:49:02 2022年6月13日 

次接驳盒断开！短信发送情况：值不能为 null。
参数名: String

------------------------------------


Log Entry : 12:49:29 2022年6月13日 

数据采集器1断开！短信发送情况值不能为 null。
参数名: String

------------------------------------


Log Entry : 12:49:41 2022年6月13日 

次接驳盒断开！短信发送情况：值不能为 null。
参数名: String

------------------------------------


Log Entry : 12:50:08 2022年6月13日 

数据采集器1断开！短信发送情况值不能为 null。
参数名: String

------------------------------------


Log Entry : 12:50:20 2022年6月13日 

主接驳盒断开！短信发送情况：值不能为 null。
参数名: String

------------------------------------


Log Entry : 12:50:32 2022年6月13日 

次接驳盒断开！短信发送情况：值不能为 null。
参数名: String

------------------------------------


Log Entry : 12:50:59 2022年6月13日 

数据采集器1断开！短信发送情况值不能为 null。
参数名: String

------------------------------------


Log Entry : 12:51:11 2022年6月13日 

次接驳盒断开！短信发送情况：值不能为 null。
参数名: String

------------------------------------


Log Entry : 12:51:38 2022年6月13日 

数据采集器1断开！短信发送情况值不能为 null。
参数名: String

------------------------------------


Log Entry : 12:51:50 2022年6月13日 

主接驳盒断开！短信发送情况：值不能为 null。
参数名: String

------------------------------------


Log Entry : 12:52:02 2022年6月13日 

次接驳盒断开！短信发送情况：值不能为 null。
参数名: String

------------------------------------


Log Entry : 12:52:30 2022年6月13日 

数据采集器1断开！短信发送情况值不能为 null。
参数名: String

------------------------------------


Log Entry : 12:52:42 2022年6月13日 

次接驳盒断开！短信发送情况：值不能为 null。
参数名: String

------------------------------------


Log Entry : 12:53:09 2022年6月13日 

数据采集器1断开！短信发送情况值不能为 null。
参数名: String

------------------------------------


Log Entry : 12:53:21 2022年6月13日 

主接驳盒断开！短信发送情况：值不能为 null。
参数名: String

------------------------------------


Log Entry : 12:53:33 2022年6月13日 

次接驳盒断开！短信发送情况：值不能为 null。
参数名: String

------------------------------------


Log Entry : 12:54:00 2022年6月13日 

数据采集器1断开！短信发送情况值不能为 null。
参数名: String

------------------------------------


Log Entry : 12:54:12 2022年6月13日 

次接驳盒断开！短信发送情况：值不能为 null。
参数名: String

------------------------------------


Log Entry : 12:54:39 2022年6月13日 

数据采集器1断开！短信发送情况值不能为 null。
参数名: String

------------------------------------


Log Entry : 12:54:51 2022年6月13日 

主接驳盒断开！短信发送情况：值不能为 null。
参数名: String

------------------------------------


Log Entry : 12:55:03 2022年6月13日 

次接驳盒断开！短信发送情况：值不能为 null。
参数名: String

------------------------------------


Log Entry : 12:55:31 2022年6月13日 

数据采集器1断开！短信发送情况值不能为 null。
参数名: String

------------------------------------


Log Entry : 12:55:43 2022年6月13日 

次接驳盒断开！短信发送情况：值不能为 null。
参数名: String

------------------------------------


Log Entry : 12:56:10 2022年6月13日 

数据采集器1断开！短信发送情况值不能为 null。
参数名: String

------------------------------------


Log Entry : 12:56:22 2022年6月13日 

主接驳盒断开！短信发送情况：值不能为 null。
参数名: String

------------------------------------


Log Entry : 12:56:34 2022年6月13日 

次接驳盒断开！短信发送情况：值不能为 null。
参数名: String

------------------------------------


Log Entry : 12:57:01 2022年6月13日 

数据采集器1断开！短信发送情况值不能为 null。
参数名: String

------------------------------------


Log Entry : 12:57:13 2022年6月13日 

次接驳盒断开！短信发送情况：值不能为 null。
参数名: String

------------------------------------


Log Entry : 12:57:40 2022年6月13日 

数据采集器1断开！短信发送情况值不能为 null。
参数名: String

------------------------------------


Log Entry : 12:57:52 2022年6月13日 

主接驳盒断开！短信发送情况：值不能为 null。
参数名: String

------------------------------------


Log Entry : 12:58:04 2022年6月13日 

次接驳盒断开！短信发送情况：值不能为 null。
参数名: String

------------------------------------


Log Entry : 12:58:31 2022年6月13日 

数据采集器1断开！短信发送情况值不能为 null。
参数名: String

------------------------------------


Log Entry : 12:58:43 2022年6月13日 

次接驳盒断开！短信发送情况：值不能为 null。
参数名: String

------------------------------------


Log Entry : 12:59:11 2022年6月13日 

数据采集器1断开！短信发送情况值不能为 null。
参数名: String

------------------------------------


Log Entry : 12:59:23 2022年6月13日 

主接驳盒断开！短信发送情况：值不能为 null。
参数名: String

------------------------------------


Log Entry : 12:59:35 2022年6月13日 

次接驳盒断开！短信发送情况：值不能为 null。
参数名: String

------------------------------------


Log Entry : 13:00:02 2022年6月13日 

数据采集器1断开！短信发送情况值不能为 null。
参数名: String

------------------------------------


Log Entry : 13:00:14 2022年6月13日 

次接驳盒断开！短信发送情况：值不能为 null。
参数名: String

------------------------------------


Log Entry : 13:00:41 2022年6月13日 

数据采集器1断开！短信发送情况值不能为 null。
参数名: String

------------------------------------


Log Entry : 13:00:53 2022年6月13日 

主接驳盒断开！短信发送情况：值不能为 null。
参数名: String

------------------------------------


Log Entry : 13:01:05 2022年6月13日 

次接驳盒断开！短信发送情况：值不能为 null。
参数名: String

------------------------------------


Log Entry : 13:01:32 2022年6月13日 

数据采集器1断开！短信发送情况值不能为 null。
参数名: String

------------------------------------


Log Entry : 13:01:44 2022年6月13日 

次接驳盒断开！短信发送情况：值不能为 null。
参数名: String

------------------------------------


Log Entry : 13:02:12 2022年6月13日 

数据采集器1断开！短信发送情况值不能为 null。
参数名: String

------------------------------------


Log Entry : 13:02:24 2022年6月13日 

主接驳盒断开！短信发送情况：值不能为 null。
参数名: String

------------------------------------


Log Entry : 13:02:36 2022年6月13日 

次接驳盒断开！短信发送情况：值不能为 null。
参数名: String

------------------------------------


Log Entry : 13:03:03 2022年6月13日 

数据采集器1断开！短信发送情况值不能为 null。
参数名: String

------------------------------------


Log Entry : 13:03:15 2022年6月13日 

次接驳盒断开！短信发送情况：值不能为 null。
参数名: String

------------------------------------


Log Entry : 13:03:42 2022年6月13日 

数据采集器1断开！短信发送情况值不能为 null。
参数名: String

------------------------------------


Log Entry : 13:03:54 2022年6月13日 

主接驳盒断开！短信发送情况：值不能为 null。
参数名: String

------------------------------------


Log Entry : 13:04:06 2022年6月13日 

次接驳盒断开！短信发送情况：值不能为 null。
参数名: String

------------------------------------


Log Entry : 13:04:33 2022年6月13日 

数据采集器1断开！短信发送情况值不能为 null。
参数名: String

------------------------------------


Log Entry : 13:04:45 2022年6月13日 

次接驳盒断开！短信发送情况：值不能为 null。
参数名: String

------------------------------------


Log Entry : 13:05:13 2022年6月13日 

数据采集器1断开！短信发送情况值不能为 null。
参数名: String

------------------------------------


Log Entry : 13:05:25 2022年6月13日 

主接驳盒断开！短信发送情况：值不能为 null。
参数名: String

------------------------------------


Log Entry : 13:05:37 2022年6月13日 

次接驳盒断开！短信发送情况：值不能为 null。
参数名: String

------------------------------------


Log Entry : 13:06:04 2022年6月13日 

数据采集器1断开！短信发送情况值不能为 null。
参数名: String

------------------------------------


Log Entry : 13:06:16 2022年6月13日 

次接驳盒断开！短信发送情况：值不能为 null。
参数名: String

------------------------------------


Log Entry : 13:06:43 2022年6月13日 

数据采集器1断开！短信发送情况值不能为 null。
参数名: String

------------------------------------


Log Entry : 13:06:55 2022年6月13日 

主接驳盒断开！短信发送情况：值不能为 null。
参数名: String

------------------------------------


Log Entry : 13:07:07 2022年6月13日 

次接驳盒断开！短信发送情况：值不能为 null。
参数名: String

------------------------------------


Log Entry : 13:07:34 2022年6月13日 

数据采集器1断开！短信发送情况值不能为 null。
参数名: String

------------------------------------


Log Entry : 13:07:46 2022年6月13日 

次接驳盒断开！短信发送情况：值不能为 null。
参数名: String

------------------------------------


Log Entry : 13:08:13 2022年6月13日 

数据采集器1断开！短信发送情况值不能为 null。
参数名: String

------------------------------------


Log Entry : 13:08:26 2022年6月13日 

主接驳盒断开！短信发送情况：值不能为 null。
参数名: String

------------------------------------


Log Entry : 13:08:38 2022年6月13日 

次接驳盒断开！短信发送情况：值不能为 null。
参数名: String

------------------------------------


Log Entry : 13:09:05 2022年6月13日 

数据采集器1断开！短信发送情况值不能为 null。
参数名: String

------------------------------------


Log Entry : 13:09:17 2022年6月13日 

次接驳盒断开！短信发送情况：值不能为 null。
参数名: String

------------------------------------


Log Entry : 13:09:44 2022年6月13日 

数据采集器1断开！短信发送情况值不能为 null。
参数名: String

------------------------------------


Log Entry : 13:09:56 2022年6月13日 

主接驳盒断开！短信发送情况：值不能为 null。
参数名: String

------------------------------------


Log Entry : 13:10:08 2022年6月13日 

次接驳盒断开！短信发送情况：值不能为 null。
参数名: String

------------------------------------


Log Entry : 13:10:35 2022年6月13日 

数据采集器1断开！短信发送情况值不能为 null。
参数名: String

------------------------------------


Log Entry : 13:10:47 2022年6月13日 

次接驳盒断开！短信发送情况：值不能为 null。
参数名: String

------------------------------------


Log Entry : 13:11:15 2022年6月13日 

数据采集器1断开！短信发送情况值不能为 null。
参数名: String

------------------------------------


Log Entry : 13:11:27 2022年6月13日 

主接驳盒断开！短信发送情况：值不能为 null。
参数名: String

------------------------------------


Log Entry : 13:11:39 2022年6月13日 

次接驳盒断开！短信发送情况：值不能为 null。
参数名: String

------------------------------------


Log Entry : 13:12:06 2022年6月13日 

数据采集器1断开！短信发送情况值不能为 null。
参数名: String

------------------------------------


Log Entry : 13:12:18 2022年6月13日 

次接驳盒断开！短信发送情况：值不能为 null。
参数名: String

------------------------------------


Log Entry : 13:12:45 2022年6月13日 

数据采集器1断开！短信发送情况值不能为 null。
参数名: String

------------------------------------


Log Entry : 13:12:57 2022年6月13日 

主接驳盒断开！短信发送情况：值不能为 null。
参数名: String

------------------------------------


Log Entry : 13:13:09 2022年6月13日 

次接驳盒断开！短信发送情况：值不能为 null。
参数名: String

------------------------------------


Log Entry : 13:13:36 2022年6月13日 

数据采集器1断开！短信发送情况值不能为 null。
参数名: String

------------------------------------


Log Entry : 13:13:48 2022年6月13日 

次接驳盒断开！短信发送情况：值不能为 null。
参数名: String

------------------------------------


Log Entry : 13:14:15 2022年6月13日 

数据采集器1断开！短信发送情况值不能为 null。
参数名: String

------------------------------------


Log Entry : 13:14:27 2022年6月13日 

主接驳盒断开！短信发送情况：值不能为 null。
参数名: String

------------------------------------


Log Entry : 13:14:39 2022年6月13日 

次接驳盒断开！短信发送情况：值不能为 null。
参数名: String

------------------------------------


Log Entry : 13:15:06 2022年6月13日 

数据采集器1断开！短信发送情况值不能为 null。
参数名: String

------------------------------------


Log Entry : 13:15:19 2022年6月13日 

次接驳盒断开！短信发送情况：值不能为 null。
参数名: String

------------------------------------


Log Entry : 13:15:46 2022年6月13日 

数据采集器1断开！短信发送情况值不能为 null。
参数名: String

------------------------------------


Log Entry : 13:15:58 2022年6月13日 

主接驳盒断开！短信发送情况：值不能为 null。
参数名: String

------------------------------------


Log Entry : 13:16:10 2022年6月13日 

次接驳盒断开！短信发送情况：值不能为 null。
参数名: String

------------------------------------


Log Entry : 13:16:37 2022年6月13日 

数据采集器1断开！短信发送情况值不能为 null。
参数名: String

------------------------------------


Log Entry : 13:16:49 2022年6月13日 

次接驳盒断开！短信发送情况：值不能为 null。
参数名: String

------------------------------------


Log Entry : 13:17:17 2022年6月13日 

数据采集器1断开！短信发送情况值不能为 null。
参数名: String

------------------------------------


Log Entry : 13:17:29 2022年6月13日 

主接驳盒断开！短信发送情况：值不能为 null。
参数名: String

------------------------------------


Log Entry : 13:17:41 2022年6月13日 

次接驳盒断开！短信发送情况：值不能为 null。
参数名: String

------------------------------------


Log Entry : 13:18:08 2022年6月13日 

数据采集器1断开！短信发送情况值不能为 null。
参数名: String

------------------------------------


Log Entry : 13:18:20 2022年6月13日 

次接驳盒断开！短信发送情况：值不能为 null。
参数名: String

------------------------------------


Log Entry : 13:18:47 2022年6月13日 

数据采集器1断开！短信发送情况值不能为 null。
参数名: String

------------------------------------


Log Entry : 13:18:59 2022年6月13日 

主接驳盒断开！短信发送情况：值不能为 null。
参数名: String

------------------------------------


Log Entry : 13:19:11 2022年6月13日 

次接驳盒断开！短信发送情况：值不能为 null。
参数名: String

------------------------------------


Log Entry : 13:19:38 2022年6月13日 

数据采集器1断开！短信发送情况值不能为 null。
参数名: String

------------------------------------


Log Entry : 13:19:50 2022年6月13日 

次接驳盒断开！短信发送情况：值不能为 null。
参数名: String

------------------------------------


Log Entry : 13:20:17 2022年6月13日 

数据采集器1断开！短信发送情况值不能为 null。
参数名: String

------------------------------------


Log Entry : 13:20:29 2022年6月13日 

主接驳盒断开！短信发送情况：值不能为 null。
参数名: String

------------------------------------


Log Entry : 13:20:41 2022年6月13日 

次接驳盒断开！短信发送情况：值不能为 null。
参数名: String

------------------------------------


Log Entry : 13:21:09 2022年6月13日 

数据采集器1断开！短信发送情况值不能为 null。
参数名: String

------------------------------------


Log Entry : 13:21:21 2022年6月13日 

次接驳盒断开！短信发送情况：值不能为 null。
参数名: String

------------------------------------


Log Entry : 13:21:48 2022年6月13日 

数据采集器1断开！短信发送情况值不能为 null。
参数名: String

------------------------------------


Log Entry : 13:22:00 2022年6月13日 

主接驳盒断开！短信发送情况：值不能为 null。
参数名: String

------------------------------------


Log Entry : 13:22:12 2022年6月13日 

次接驳盒断开！短信发送情况：值不能为 null。
参数名: String

------------------------------------


Log Entry : 13:22:39 2022年6月13日 

数据采集器1断开！短信发送情况值不能为 null。
参数名: String

------------------------------------


Log Entry : 13:22:51 2022年6月13日 

次接驳盒断开！短信发送情况：值不能为 null。
参数名: String

------------------------------------


Log Entry : 13:23:19 2022年6月13日 

数据采集器1断开！短信发送情况值不能为 null。
参数名: String

------------------------------------


Log Entry : 13:23:31 2022年6月13日 

主接驳盒断开！短信发送情况：值不能为 null。
参数名: String

------------------------------------


Log Entry : 13:23:43 2022年6月13日 

次接驳盒断开！短信发送情况：值不能为 null。
参数名: String

------------------------------------


Log Entry : 13:24:10 2022年6月13日 

数据采集器1断开！短信发送情况值不能为 null。
参数名: String

------------------------------------


Log Entry : 13:24:22 2022年6月13日 

次接驳盒断开！短信发送情况：值不能为 null。
参数名: String

------------------------------------


Log Entry : 13:24:49 2022年6月13日 

数据采集器1断开！短信发送情况值不能为 null。
参数名: String

------------------------------------


Log Entry : 13:25:01 2022年6月13日 

主接驳盒断开！短信发送情况：值不能为 null。
参数名: String

------------------------------------


Log Entry : 13:25:13 2022年6月13日 

次接驳盒断开！短信发送情况：值不能为 null。
参数名: String

------------------------------------


Log Entry : 13:25:40 2022年6月13日 

数据采集器1断开！短信发送情况值不能为 null。
参数名: String

------------------------------------


Log Entry : 13:25:52 2022年6月13日 

次接驳盒断开！短信发送情况：值不能为 null。
参数名: String

------------------------------------


Log Entry : 13:26:19 2022年6月13日 

数据采集器1断开！短信发送情况值不能为 null。
参数名: String

------------------------------------


Log Entry : 13:26:31 2022年6月13日 

主接驳盒断开！短信发送情况：值不能为 null。
参数名: String

------------------------------------


Log Entry : 13:26:43 2022年6月13日 

次接驳盒断开！短信发送情况：值不能为 null。
参数名: String

------------------------------------


Log Entry : 13:27:11 2022年6月13日 

数据采集器1断开！短信发送情况值不能为 null。
参数名: String

------------------------------------


Log Entry : 13:27:23 2022年6月13日 

次接驳盒断开！短信发送情况：值不能为 null。
参数名: String

------------------------------------


Log Entry : 13:27:50 2022年6月13日 

数据采集器1断开！短信发送情况值不能为 null。
参数名: String

------------------------------------


Log Entry : 13:28:02 2022年6月13日 

主接驳盒断开！短信发送情况：值不能为 null。
参数名: String

------------------------------------


Log Entry : 13:28:14 2022年6月13日 

次接驳盒断开！短信发送情况：值不能为 null。
参数名: String

------------------------------------


Log Entry : 13:28:41 2022年6月13日 

数据采集器1断开！短信发送情况值不能为 null。
参数名: String

------------------------------------


Log Entry : 13:28:53 2022年6月13日 

次接驳盒断开！短信发送情况：值不能为 null。
参数名: String

------------------------------------


Log Entry : 13:29:21 2022年6月13日 

数据采集器1断开！短信发送情况值不能为 null。
参数名: String

------------------------------------


Log Entry : 13:29:33 2022年6月13日 

主接驳盒断开！短信发送情况：值不能为 null。
参数名: String

------------------------------------


Log Entry : 13:29:45 2022年6月13日 

次接驳盒断开！短信发送情况：值不能为 null。
参数名: String

------------------------------------


Log Entry : 13:30:12 2022年6月13日 

数据采集器1断开！短信发送情况值不能为 null。
参数名: String

------------------------------------


Log Entry : 13:30:24 2022年6月13日 

次接驳盒断开！短信发送情况：值不能为 null。
参数名: String

------------------------------------


Log Entry : 13:30:51 2022年6月13日 

数据采集器1断开！短信发送情况值不能为 null。
参数名: String

------------------------------------


Log Entry : 13:31:03 2022年6月13日 

主接驳盒断开！短信发送情况：值不能为 null。
参数名: String

------------------------------------


Log Entry : 13:31:15 2022年6月13日 

次接驳盒断开！短信发送情况：值不能为 null。
参数名: String

------------------------------------


Log Entry : 13:31:42 2022年6月13日 

数据采集器1断开！短信发送情况值不能为 null。
参数名: String

------------------------------------


Log Entry : 13:31:54 2022年6月13日 

次接驳盒断开！短信发送情况：值不能为 null。
参数名: String

------------------------------------


Log Entry : 13:32:21 2022年6月13日 

数据采集器1断开！短信发送情况值不能为 null。
参数名: String

------------------------------------


Log Entry : 13:32:33 2022年6月13日 

主接驳盒断开！短信发送情况：值不能为 null。
参数名: String

------------------------------------


Log Entry : 13:32:45 2022年6月13日 

次接驳盒断开！短信发送情况：值不能为 null。
参数名: String

------------------------------------


Log Entry : 13:33:12 2022年6月13日 

数据采集器1断开！短信发送情况值不能为 null。
参数名: String

------------------------------------


Log Entry : 13:33:25 2022年6月13日 

次接驳盒断开！短信发送情况：值不能为 null。
参数名: String

------------------------------------


Log Entry : 13:33:52 2022年6月13日 

数据采集器1断开！短信发送情况值不能为 null。
参数名: String

------------------------------------


Log Entry : 13:34:04 2022年6月13日 

主接驳盒断开！短信发送情况：值不能为 null。
参数名: String

------------------------------------


Log Entry : 13:34:16 2022年6月13日 

次接驳盒断开！短信发送情况：值不能为 null。
参数名: String

------------------------------------


Log Entry : 13:34:43 2022年6月13日 

数据采集器1断开！短信发送情况值不能为 null。
参数名: String

------------------------------------


Log Entry : 13:34:55 2022年6月13日 

次接驳盒断开！短信发送情况：值不能为 null。
参数名: String

------------------------------------


Log Entry : 13:35:23 2022年6月13日 

数据采集器1断开！短信发送情况值不能为 null。
参数名: String

------------------------------------


Log Entry : 13:35:35 2022年6月13日 

主接驳盒断开！短信发送情况：值不能为 null。
参数名: String

------------------------------------


Log Entry : 13:35:47 2022年6月13日 

次接驳盒断开！短信发送情况：值不能为 null。
参数名: String

------------------------------------


Log Entry : 13:36:14 2022年6月13日 

数据采集器1断开！短信发送情况值不能为 null。
参数名: String

------------------------------------


Log Entry : 13:36:26 2022年6月13日 

次接驳盒断开！短信发送情况：值不能为 null。
参数名: String

------------------------------------


Log Entry : 13:36:53 2022年6月13日 

数据采集器1断开！短信发送情况值不能为 null。
参数名: String

------------------------------------


Log Entry : 13:37:05 2022年6月13日 

主接驳盒断开！短信发送情况：值不能为 null。
参数名: String

------------------------------------


Log Entry : 13:37:17 2022年6月13日 

次接驳盒断开！短信发送情况：值不能为 null。
参数名: String

------------------------------------


Log Entry : 13:37:44 2022年6月13日 

数据采集器1断开！短信发送情况值不能为 null。
参数名: String

------------------------------------


Log Entry : 13:37:56 2022年6月13日 

次接驳盒断开！短信发送情况：值不能为 null。
参数名: String

------------------------------------


Log Entry : 13:38:23 2022年6月13日 

数据采集器1断开！短信发送情况值不能为 null。
参数名: String

------------------------------------


Log Entry : 13:38:35 2022年6月13日 

主接驳盒断开！短信发送情况：值不能为 null。
参数名: String

------------------------------------


Log Entry : 13:38:47 2022年6月13日 

次接驳盒断开！短信发送情况：值不能为 null。
参数名: String

------------------------------------


Log Entry : 13:39:14 2022年6月13日 

数据采集器1断开！短信发送情况值不能为 null。
参数名: String

------------------------------------


Log Entry : 13:39:26 2022年6月13日 

次接驳盒断开！短信发送情况：值不能为 null。
参数名: String

------------------------------------


Log Entry : 13:39:54 2022年6月13日 

数据采集器1断开！短信发送情况值不能为 null。
参数名: String

------------------------------------


Log Entry : 13:40:06 2022年6月13日 

主接驳盒断开！短信发送情况：值不能为 null。
参数名: String

------------------------------------


Log Entry : 13:40:18 2022年6月13日 

次接驳盒断开！短信发送情况：值不能为 null。
参数名: String

------------------------------------


Log Entry : 13:40:45 2022年6月13日 

数据采集器1断开！短信发送情况值不能为 null。
参数名: String

------------------------------------


Log Entry : 13:40:57 2022年6月13日 

次接驳盒断开！短信发送情况：值不能为 null。
参数名: String

------------------------------------


Log Entry : 13:41:25 2022年6月13日 

数据采集器1断开！短信发送情况值不能为 null。
参数名: String

------------------------------------


Log Entry : 13:41:37 2022年6月13日 

主接驳盒断开！短信发送情况：值不能为 null。
参数名: String

------------------------------------


Log Entry : 13:41:49 2022年6月13日 

次接驳盒断开！短信发送情况：值不能为 null。
参数名: String

------------------------------------


Log Entry : 13:42:16 2022年6月13日 

数据采集器1断开！短信发送情况值不能为 null。
参数名: String

------------------------------------


Log Entry : 13:42:28 2022年6月13日 

次接驳盒断开！短信发送情况：值不能为 null。
参数名: String

------------------------------------


Log Entry : 13:42:55 2022年6月13日 

数据采集器1断开！短信发送情况值不能为 null。
参数名: String

------------------------------------


Log Entry : 13:43:07 2022年6月13日 

主接驳盒断开！短信发送情况：值不能为 null。
参数名: String

------------------------------------


Log Entry : 13:43:19 2022年6月13日 

次接驳盒断开！短信发送情况：值不能为 null。
参数名: String

------------------------------------


Log Entry : 13:43:23 2022年6月13日 

数据采集器1断开！短信发送情况短信数量不足

------------------------------------


Log Entry : 13:43:29 2022年6月13日 

次接驳盒断开！短信发送情况：短信数量不足

------------------------------------


Log Entry : 13:44:20 2022年6月13日 

主接驳盒断开！短信发送情况：短信数量不足

------------------------------------


Log Entry : 13:45:22 2022年6月13日 

主接驳盒断开！短信发送情况：短信数量不足

------------------------------------


Log Entry : 13:46:24 2022年6月13日 

主接驳盒断开！短信发送情况：短信数量不足

------------------------------------


Log Entry : 13:47:27 2022年6月13日 

主接驳盒断开！短信发送情况：短信数量不足

------------------------------------


Log Entry : 13:48:29 2022年6月13日 

主接驳盒断开！短信发送情况：短信数量不足

------------------------------------


Log Entry : 13:49:32 2022年6月13日 

主接驳盒断开！短信发送情况：短信数量不足

------------------------------------


Log Entry : 13:50:17 2022年6月13日 

数据采集器1断开！短信发送情况短信数量不足

------------------------------------


Log Entry : 13:50:34 2022年6月13日 

主接驳盒断开！短信发送情况：短信数量不足

------------------------------------


Log Entry : 13:51:36 2022年6月13日 

主接驳盒断开！短信发送情况：短信数量不足

------------------------------------


Log Entry : 13:52:39 2022年6月13日 

主接驳盒断开！短信发送情况：短信数量不足

------------------------------------


Log Entry : 13:53:41 2022年6月13日 

主接驳盒断开！短信发送情况：短信数量不足

------------------------------------


Log Entry : 13:54:43 2022年6月13日 

主接驳盒断开！短信发送情况：短信数量不足

------------------------------------


Log Entry : 13:55:46 2022年6月13日 

主接驳盒断开！短信发送情况：短信数量不足

------------------------------------


Log Entry : 13:56:43 2022年6月13日 

数据采集器1断开！短信发送情况短信数量不足

------------------------------------


Log Entry : 13:56:48 2022年6月13日 

主接驳盒断开！短信发送情况：短信数量不足

------------------------------------


Log Entry : 13:57:50 2022年6月13日 

主接驳盒断开！短信发送情况：短信数量不足

------------------------------------


Log Entry : 13:58:53 2022年6月13日 

主接驳盒断开！短信发送情况：短信数量不足

------------------------------------


Log Entry : 13:59:56 2022年6月13日 

主接驳盒断开！短信发送情况：短信数量不足

------------------------------------


Log Entry : 14:00:57 2022年6月13日 

主接驳盒断开！短信发送情况：短信数量不足

------------------------------------


Log Entry : 14:02:00 2022年6月13日 

主接驳盒断开！短信发送情况：短信数量不足

------------------------------------


Log Entry : 14:03:03 2022年6月13日 

主接驳盒断开！短信发送情况：短信数量不足

------------------------------------


Log Entry : 14:04:05 2022年6月13日 

主接驳盒断开！短信发送情况：短信数量不足

------------------------------------


Log Entry : 14:05:07 2022年6月13日 

主接驳盒断开！短信发送情况：短信数量不足

------------------------------------


Log Entry : 14:06:09 2022年6月13日 

主接驳盒断开！短信发送情况：短信数量不足

------------------------------------


Log Entry : 14:07:12 2022年6月13日 

主接驳盒断开！短信发送情况：短信数量不足

------------------------------------


Log Entry : 14:07:13 2022年6月13日 

数据采集器1断开！短信发送情况短信数量不足

------------------------------------


Log Entry : 14:08:15 2022年6月13日 

主接驳盒断开！短信发送情况：短信数量不足

------------------------------------


Log Entry : 14:34:25 2022年6月13日 

主接驳盒断开！短信发送情况：短信数量不足

------------------------------------


Log Entry : 14:35:27 2022年6月13日 

主接驳盒断开！短信发送情况：短信数量不足

------------------------------------


Log Entry : 14:36:30 2022年6月13日 

主接驳盒断开！短信发送情况：短信数量不足

------------------------------------


Log Entry : 14:37:32 2022年6月13日 

主接驳盒断开！短信发送情况：短信数量不足

------------------------------------


Log Entry : 14:38:34 2022年6月13日 

主接驳盒断开！短信发送情况：短信数量不足

------------------------------------


Log Entry : 14:39:37 2022年6月13日 

主接驳盒断开！短信发送情况：短信数量不足

------------------------------------


Log Entry : 14:40:39 2022年6月13日 

主接驳盒断开！短信发送情况：短信数量不足

------------------------------------


Log Entry : 14:41:42 2022年6月13日 

主接驳盒断开！短信发送情况：短信数量不足

------------------------------------


Log Entry : 14:42:44 2022年6月13日 

主接驳盒断开！短信发送情况：短信数量不足

------------------------------------


Log Entry : 14:43:48 2022年6月13日 

主接驳盒断开！短信发送情况：短信数量不足

------------------------------------


Log Entry : 14:44:51 2022年6月13日 

主接驳盒断开！短信发送情况：短信数量不足

------------------------------------


Log Entry : 14:45:53 2022年6月13日 

主接驳盒断开！短信发送情况：短信数量不足

------------------------------------


Log Entry : 14:46:56 2022年6月13日 

主接驳盒断开！短信发送情况：短信数量不足

------------------------------------


Log Entry : 14:47:58 2022年6月13日 

主接驳盒断开！短信发送情况：短信数量不足

------------------------------------


Log Entry : 14:49:01 2022年6月13日 

主接驳盒断开！短信发送情况：短信数量不足

------------------------------------


Log Entry : 14:50:02 2022年6月13日 

主接驳盒断开！短信发送情况：短信数量不足

------------------------------------


Log Entry : 14:51:05 2022年6月13日 

主接驳盒断开！短信发送情况：短信数量不足

------------------------------------


Log Entry : 14:52:08 2022年6月13日 

主接驳盒断开！短信发送情况：短信数量不足

------------------------------------


Log Entry : 14:53:10 2022年6月13日 

主接驳盒断开！短信发送情况：短信数量不足

------------------------------------


Log Entry : 14:54:12 2022年6月13日 

主接驳盒断开！短信发送情况：短信数量不足

------------------------------------


Log Entry : 14:55:14 2022年6月13日 

主接驳盒断开！短信发送情况：短信数量不足

------------------------------------


Log Entry : 14:56:17 2022年6月13日 

主接驳盒断开！短信发送情况：短信数量不足

------------------------------------


Log Entry : 14:57:19 2022年6月13日 

主接驳盒断开！短信发送情况：短信数量不足

------------------------------------


Log Entry : 14:58:21 2022年6月13日 

主接驳盒断开！短信发送情况：短信数量不足

------------------------------------


Log Entry : 14:59:24 2022年6月13日 

主接驳盒断开！短信发送情况：短信数量不足

------------------------------------


Log Entry : 15:00:26 2022年6月13日 

主接驳盒断开！短信发送情况：短信数量不足

------------------------------------


Log Entry : 15:01:28 2022年6月13日 

主接驳盒断开！短信发送情况：短信数量不足

------------------------------------


Log Entry : 15:02:31 2022年6月13日 

主接驳盒断开！短信发送情况：短信数量不足

------------------------------------


Log Entry : 15:03:33 2022年6月13日 

主接驳盒断开！短信发送情况：短信数量不足

------------------------------------


Log Entry : 15:04:36 2022年6月13日 

主接驳盒断开！短信发送情况：短信数量不足

------------------------------------


Log Entry : 15:05:38 2022年6月13日 

主接驳盒断开！短信发送情况：短信数量不足

------------------------------------


Log Entry : 15:06:40 2022年6月13日 

主接驳盒断开！短信发送情况：短信数量不足

------------------------------------


Log Entry : 15:07:43 2022年6月13日 

主接驳盒断开！短信发送情况：短信数量不足

------------------------------------


Log Entry : 15:08:45 2022年6月13日 

主接驳盒断开！短信发送情况：短信数量不足

------------------------------------


Log Entry : 15:09:48 2022年6月13日 

主接驳盒断开！短信发送情况：短信数量不足

------------------------------------


Log Entry : 15:10:50 2022年6月13日 

主接驳盒断开！短信发送情况：短信数量不足

------------------------------------


Log Entry : 15:11:52 2022年6月13日 

主接驳盒断开！短信发送情况：短信数量不足

------------------------------------


Log Entry : 15:12:55 2022年6月13日 

主接驳盒断开！短信发送情况：短信数量不足

------------------------------------


Log Entry : 15:13:57 2022年6月13日 

主接驳盒断开！短信发送情况：短信数量不足

------------------------------------


Log Entry : 15:14:59 2022年6月13日 

主接驳盒断开！短信发送情况：短信数量不足

------------------------------------


Log Entry : 15:16:02 2022年6月13日 

主接驳盒断开！短信发送情况：短信数量不足

------------------------------------


Log Entry : 15:17:04 2022年6月13日 

主接驳盒断开！短信发送情况：短信数量不足

------------------------------------


Log Entry : 15:18:06 2022年6月13日 

主接驳盒断开！短信发送情况：短信数量不足

------------------------------------


Log Entry : 15:19:09 2022年6月13日 

主接驳盒断开！短信发送情况：短信数量不足

------------------------------------


Log Entry : 15:20:11 2022年6月13日 

主接驳盒断开！短信发送情况：短信数量不足

------------------------------------


Log Entry : 15:21:13 2022年6月13日 

主接驳盒断开！短信发送情况：短信数量不足

------------------------------------


Log Entry : 15:22:16 2022年6月13日 

主接驳盒断开！短信发送情况：短信数量不足

------------------------------------


Log Entry : 15:23:18 2022年6月13日 

主接驳盒断开！短信发送情况：短信数量不足

------------------------------------


Log Entry : 15:24:20 2022年6月13日 

主接驳盒断开！短信发送情况：短信数量不足

------------------------------------


Log Entry : 15:25:23 2022年6月13日 

主接驳盒断开！短信发送情况：短信数量不足

------------------------------------


Log Entry : 15:26:25 2022年6月13日 

主接驳盒断开！短信发送情况：短信数量不足

------------------------------------


Log Entry : 15:27:28 2022年6月13日 

主接驳盒断开！短信发送情况：短信数量不足

------------------------------------


Log Entry : 15:28:30 2022年6月13日 

主接驳盒断开！短信发送情况：短信数量不足

------------------------------------


Log Entry : 15:29:32 2022年6月13日 

主接驳盒断开！短信发送情况：短信数量不足

------------------------------------


Log Entry : 15:30:35 2022年6月13日 

主接驳盒断开！短信发送情况：短信数量不足

------------------------------------


Log Entry : 15:31:37 2022年6月13日 

主接驳盒断开！短信发送情况：短信数量不足

------------------------------------


Log Entry : 15:32:39 2022年6月13日 

主接驳盒断开！短信发送情况：短信数量不足

------------------------------------


Log Entry : 15:33:42 2022年6月13日 

主接驳盒断开！短信发送情况：短信数量不足

------------------------------------


Log Entry : 15:34:44 2022年6月13日 

主接驳盒断开！短信发送情况：短信数量不足

------------------------------------


Log Entry : 15:35:46 2022年6月13日 

主接驳盒断开！短信发送情况：短信数量不足

------------------------------------


Log Entry : 15:36:49 2022年6月13日 

主接驳盒断开！短信发送情况：短信数量不足

------------------------------------


Log Entry : 15:37:43 2022年6月13日 

数据采集器1断开！短信发送情况值不能为 null。
参数名: String

------------------------------------


Log Entry : 15:38:00 2022年6月13日 

次接驳盒断开！短信发送情况：值不能为 null。
参数名: String

------------------------------------


Log Entry : 15:38:12 2022年6月13日 

主接驳盒断开！短信发送情况：值不能为 null。
参数名: String

------------------------------------


Log Entry : 15:38:39 2022年6月13日 

次接驳盒断开！短信发送情况：值不能为 null。
参数名: String

------------------------------------


Log Entry : 15:38:51 2022年6月13日 

数据采集器1断开！短信发送情况值不能为 null。
参数名: String

------------------------------------


Log Entry : 15:39:14 2022年6月13日 

主接驳盒断开！短信发送情况：短信数量不足

------------------------------------


Log Entry : 15:40:16 2022年6月13日 

主接驳盒断开！短信发送情况：短信数量不足

------------------------------------


Log Entry : 15:41:19 2022年6月13日 

主接驳盒断开！短信发送情况：短信数量不足

------------------------------------


Log Entry : 15:42:21 2022年6月13日 

主接驳盒断开！短信发送情况：短信数量不足

------------------------------------


Log Entry : 15:43:23 2022年6月13日 

主接驳盒断开！短信发送情况：短信数量不足

------------------------------------


Log Entry : 15:44:26 2022年6月13日 

主接驳盒断开！短信发送情况：短信数量不足

------------------------------------


Log Entry : 15:45:28 2022年6月13日 

主接驳盒断开！短信发送情况：短信数量不足

------------------------------------


Log Entry : 15:46:30 2022年6月13日 

主接驳盒断开！短信发送情况：短信数量不足

------------------------------------


Log Entry : 15:47:33 2022年6月13日 

主接驳盒断开！短信发送情况：短信数量不足

------------------------------------


Log Entry : 15:48:35 2022年6月13日 

主接驳盒断开！短信发送情况：短信数量不足

------------------------------------


Log Entry : 15:49:37 2022年6月13日 

主接驳盒断开！短信发送情况：短信数量不足

------------------------------------


Log Entry : 15:50:40 2022年6月13日 

主接驳盒断开！短信发送情况：短信数量不足

------------------------------------


Log Entry : 15:51:42 2022年6月13日 

主接驳盒断开！短信发送情况：短信数量不足

------------------------------------


Log Entry : 15:52:44 2022年6月13日 

主接驳盒断开！短信发送情况：短信数量不足

------------------------------------


Log Entry : 15:53:47 2022年6月13日 

主接驳盒断开！短信发送情况：短信数量不足

------------------------------------


Log Entry : 15:54:49 2022年6月13日 

主接驳盒断开！短信发送情况：短信数量不足

------------------------------------


Log Entry : 15:55:51 2022年6月13日 

主接驳盒断开！短信发送情况：短信数量不足

------------------------------------


Log Entry : 15:56:54 2022年6月13日 

主接驳盒断开！短信发送情况：短信数量不足

------------------------------------


Log Entry : 15:57:56 2022年6月13日 

主接驳盒断开！短信发送情况：短信数量不足

------------------------------------


Log Entry : 15:58:59 2022年6月13日 

主接驳盒断开！短信发送情况：短信数量不足

------------------------------------


Log Entry : 16:00:01 2022年6月13日 

主接驳盒断开！短信发送情况：短信数量不足

------------------------------------


Log Entry : 16:01:03 2022年6月13日 

主接驳盒断开！短信发送情况：短信数量不足

------------------------------------


Log Entry : 16:02:06 2022年6月13日 

主接驳盒断开！短信发送情况：短信数量不足

------------------------------------


Log Entry : 16:03:08 2022年6月13日 

主接驳盒断开！短信发送情况：短信数量不足

------------------------------------


Log Entry : 16:04:10 2022年6月13日 

主接驳盒断开！短信发送情况：短信数量不足

------------------------------------


Log Entry : 16:05:13 2022年6月13日 

主接驳盒断开！短信发送情况：短信数量不足

------------------------------------


Log Entry : 16:06:15 2022年6月13日 

主接驳盒断开！短信发送情况：短信数量不足

------------------------------------


Log Entry : 16:07:17 2022年6月13日 

主接驳盒断开！短信发送情况：短信数量不足

------------------------------------


Log Entry : 16:08:20 2022年6月13日 

主接驳盒断开！短信发送情况：短信数量不足

------------------------------------


Log Entry : 16:09:22 2022年6月13日 

主接驳盒断开！短信发送情况：短信数量不足

------------------------------------


Log Entry : 16:10:25 2022年6月13日 

主接驳盒断开！短信发送情况：短信数量不足

------------------------------------


Log Entry : 16:11:22 2022年6月13日 

数据采集器1断开！短信发送情况短信数量不足

------------------------------------


Log Entry : 16:11:27 2022年6月13日 

主接驳盒断开！短信发送情况：短信数量不足

------------------------------------


Log Entry : 16:12:29 2022年6月13日 

主接驳盒断开！短信发送情况：短信数量不足

------------------------------------


Log Entry : 16:13:32 2022年6月13日 

主接驳盒断开！短信发送情况：短信数量不足

------------------------------------


Log Entry : 16:14:34 2022年6月13日 

主接驳盒断开！短信发送情况：短信数量不足

------------------------------------


Log Entry : 16:15:36 2022年6月13日 

主接驳盒断开！短信发送情况：短信数量不足

------------------------------------


Log Entry : 16:16:44 2022年6月13日 

主接驳盒断开！短信发送情况：短信数量不足

------------------------------------


Log Entry : 16:17:45 2022年6月13日 

主接驳盒断开！短信发送情况：短信数量不足

------------------------------------


Log Entry : 16:18:47 2022年6月13日 

主接驳盒断开！短信发送情况：短信数量不足

------------------------------------


Log Entry : 16:19:50 2022年6月13日 

主接驳盒断开！短信发送情况：短信数量不足

------------------------------------


Log Entry : 16:20:53 2022年6月13日 

主接驳盒断开！短信发送情况：短信数量不足

------------------------------------


Log Entry : 16:21:55 2022年6月13日 

主接驳盒断开！短信发送情况：短信数量不足

------------------------------------


Log Entry : 16:22:57 2022年6月13日 

主接驳盒断开！短信发送情况：短信数量不足

------------------------------------


Log Entry : 16:23:59 2022年6月13日 

主接驳盒断开！短信发送情况：短信数量不足

------------------------------------


Log Entry : 16:25:02 2022年6月13日 

主接驳盒断开！短信发送情况：短信数量不足

------------------------------------


Log Entry : 16:26:04 2022年6月13日 

主接驳盒断开！短信发送情况：短信数量不足

------------------------------------


Log Entry : 16:27:06 2022年6月13日 

主接驳盒断开！短信发送情况：短信数量不足

------------------------------------


Log Entry : 16:28:09 2022年6月13日 

主接驳盒断开！短信发送情况：短信数量不足

------------------------------------


Log Entry : 16:29:11 2022年6月13日 

主接驳盒断开！短信发送情况：短信数量不足

------------------------------------


Log Entry : 16:30:14 2022年6月13日 

主接驳盒断开！短信发送情况：短信数量不足

------------------------------------


Log Entry : 16:31:16 2022年6月13日 

主接驳盒断开！短信发送情况：短信数量不足

------------------------------------


Log Entry : 16:32:22 2022年6月13日 

次接驳盒断开！短信发送情况：值不能为 null。
参数名: String

------------------------------------


Log Entry : 16:32:34 2022年6月13日 

数据采集器1断开！短信发送情况值不能为 null。
参数名: String

------------------------------------


Log Entry : 16:32:46 2022年6月13日 

主接驳盒断开！短信发送情况：值不能为 null。
参数名: String

------------------------------------


Log Entry : 16:33:13 2022年6月13日 

次接驳盒断开！短信发送情况：值不能为 null。
参数名: String

------------------------------------


Log Entry : 16:33:25 2022年6月13日 

数据采集器1断开！短信发送情况值不能为 null。
参数名: String

------------------------------------


Log Entry : 16:33:53 2022年6月13日 

次接驳盒断开！短信发送情况：值不能为 null。
参数名: String

------------------------------------


Log Entry : 16:34:05 2022年6月13日 

主接驳盒断开！短信发送情况：值不能为 null。
参数名: String

------------------------------------


Log Entry : 16:34:27 2022年6月13日 

数据采集器1断开！短信发送情况值不能为 null。
参数名: String

------------------------------------


Log Entry : 16:35:28 2022年6月13日 

主接驳盒断开！短信发送情况：短信数量不足

------------------------------------


Log Entry : 16:36:30 2022年6月13日 

主接驳盒断开！短信发送情况：短信数量不足

------------------------------------


Log Entry : 16:37:32 2022年6月13日 

主接驳盒断开！短信发送情况：短信数量不足

------------------------------------


Log Entry : 16:38:34 2022年6月13日 

主接驳盒断开！短信发送情况：短信数量不足

------------------------------------


Log Entry : 16:39:37 2022年6月13日 

主接驳盒断开！短信发送情况：短信数量不足

------------------------------------


Log Entry : 16:40:39 2022年6月13日 

主接驳盒断开！短信发送情况：短信数量不足

------------------------------------


Log Entry : 16:41:41 2022年6月13日 

主接驳盒断开！短信发送情况：短信数量不足

------------------------------------


Log Entry : 16:42:44 2022年6月13日 

主接驳盒断开！短信发送情况：短信数量不足

------------------------------------


Log Entry : 16:43:46 2022年6月13日 

主接驳盒断开！短信发送情况：短信数量不足

------------------------------------


Log Entry : 16:44:49 2022年6月13日 

主接驳盒断开！短信发送情况：短信数量不足

------------------------------------


Log Entry : 16:45:51 2022年6月13日 

主接驳盒断开！短信发送情况：短信数量不足

------------------------------------


Log Entry : 16:46:53 2022年6月13日 

主接驳盒断开！短信发送情况：短信数量不足

------------------------------------


Log Entry : 14:09:23 2022年6月20日 

主接驳盒断开！短信发送情况：短信数量不足

------------------------------------


Log Entry : 14:10:25 2022年6月20日 

主接驳盒断开！短信发送情况：短信数量不足

------------------------------------


Log Entry : 14:11:28 2022年6月20日 

主接驳盒断开！短信发送情况：短信数量不足

------------------------------------


Log Entry : 14:12:30 2022年6月20日 

主接驳盒断开！短信发送情况：短信数量不足

------------------------------------


Log Entry : 14:13:32 2022年6月20日 

主接驳盒断开！短信发送情况：短信数量不足

------------------------------------


Log Entry : 14:14:35 2022年6月20日 

主接驳盒断开！短信发送情况：短信数量不足

------------------------------------


Log Entry : 14:15:37 2022年6月20日 

主接驳盒断开！短信发送情况：短信数量不足

------------------------------------


Log Entry : 14:16:45 2022年6月20日 

主接驳盒断开！短信发送情况：短信数量不足

------------------------------------


Log Entry : 14:17:47 2022年6月20日 

主接驳盒断开！短信发送情况：短信数量不足

------------------------------------


Log Entry : 14:18:49 2022年6月20日 

主接驳盒断开！短信发送情况：短信数量不足

------------------------------------


Log Entry : 14:19:52 2022年6月20日 

主接驳盒断开！短信发送情况：短信数量不足

------------------------------------


Log Entry : 14:20:54 2022年6月20日 

主接驳盒断开！短信发送情况：短信数量不足

------------------------------------


Log Entry : 14:21:56 2022年6月20日 

主接驳盒断开！短信发送情况：短信数量不足

------------------------------------


Log Entry : 14:22:59 2022年6月20日 

主接驳盒断开！短信发送情况：短信数量不足

------------------------------------


Log Entry : 14:32:08 2022年6月21日 星期二 

数据采集器1断开！短信发送情况短信数量不足

------------------------------------


Log Entry : 14:42:04 2022年6月21日 星期二 

数据采集器1断开！短信发送情况短信数量不足

------------------------------------
