# Supplementary material
Source: MDPI journal article supplement (https://www.mdpi.com/2077-1312/10/8/1051)
Supplement: s1 [file s1 › OSNSystem/OSNSystem/OSNSystem/bin/Debug/LogFile.txt]

Log Entry : 14:38:19 2022年6月10日 

读入数据库seafloor_jBConfigInfo时出现异常！Timeout expired.  The timeout period elapsed prior to completion of the operation or the server is not responding.

------------------------------------


Log Entry : 14:38:34 2022年6月10日 

读入数据库seafloor_srcConfigInfo时出现异常！Timeout expired.  The timeout period elapsed prior to completion of the operation or the server is not responding.

------------------------------------


Log Entry : 14:38:49 2022年6月10日 

读入数据库seafloor_jBConfigInfo时出现异常！Timeout expired.  The timeout period elapsed prior to completion of the operation or the server is not responding.

------------------------------------


Log Entry : 14:39:10 2022年6月10日 

Load加载主接驳盒高压舱电电参数1000点出现异常！Timeout expired.  The timeout period elapsed prior to completion of the operation or the server is not responding.

------------------------------------


Log Entry : 14:39:10 2022年6月10日 

Load加载传感器1000个点出现异常！Timeout expired.  The timeout period elapsed prior to completion of the operation or the server is not responding.

------------------------------------


Log Entry : 14:39:10 2022年6月10日 

查询B舱故障值数据出现异常！Timeout expired.  The timeout period elapsed prior to completion of the operation or the server is not responding.

------------------------------------


Log Entry : 14:39:10 2022年6月10日 

首页B舱故障值显示异常！索引超出范围。必须为非负值并小于集合大小。
参数名: index

------------------------------------


Log Entry : 14:41:55 2022年6月10日 

读入数据库seafloor_jBConfigInfo时出现异常！Authentication to host '47.104.229.78' for user 'root' using method 'mysql_native_password' failed with message: Reading from the stream has failed.

------------------------------------


Log Entry : 14:46:57 2022年6月10日 

给下位机发送指令异常！您的主机中的软件中止了一个已建立的连接。

------------------------------------


Log Entry : 14:56:58 2022年6月10日 

给下位机发送指令异常！您的主机中的软件中止了一个已建立的连接。

------------------------------------


Log Entry : 15:06:59 2022年6月10日 

给下位机发送指令异常！您的主机中的软件中止了一个已建立的连接。

------------------------------------


Log Entry : 15:17:00 2022年6月10日 

给下位机发送指令异常！您的主机中的软件中止了一个已建立的连接。

------------------------------------


Log Entry : 15:19:40 2022年6月10日 

解析数据采集器1下位机环境参数程序出现异常:Fatal error encountered during command execution.接收到的内容:55AA00012020323032323A30363A31303A31353A32303A30333A3030300000024A00000043AF55CB310100000000FFFFFFFF4E324330302E3030305631312E39363523

------------------------------------


Log Entry : 15:27:02 2022年6月10日 

给下位机发送指令异常！您的主机中的软件中止了一个已建立的连接。

------------------------------------


Log Entry : 15:39:23 2022年6月10日 

给下位机发送指令异常！您的主机中的软件中止了一个已建立的连接。

------------------------------------


Log Entry : 15:49:24 2022年6月10日 

给下位机发送指令异常！您的主机中的软件中止了一个已建立的连接。

------------------------------------


Log Entry : 15:59:25 2022年6月10日 

给下位机发送指令异常！您的主机中的软件中止了一个已建立的连接。

------------------------------------


Log Entry : 16:09:26 2022年6月10日 

给下位机发送指令异常！您的主机中的软件中止了一个已建立的连接。

------------------------------------


Log Entry : 16:19:27 2022年6月10日 

给下位机发送指令异常！您的主机中的软件中止了一个已建立的连接。

------------------------------------


Log Entry : 16:29:29 2022年6月10日 

给下位机发送指令异常！您的主机中的软件中止了一个已建立的连接。

------------------------------------


Log Entry : 16:39:30 2022年6月10日 

给下位机发送指令异常！您的主机中的软件中止了一个已建立的连接。

------------------------------------


Log Entry : 9:36:59 2022年6月13日 

解析数据采集器1下位机环境参数程序出现异常:Reading from the stream has failed.接收到的内容:55AA00012030323032323A30363A31333A30393A33373A34343A3030300000006C00000043D852FBA70100000000FFFFFFFF4E334330302E3033305631312E38383023

------------------------------------


Log Entry : 9:38:38 2022年6月13日 

给下位机发送指令异常！您的主机中的软件中止了一个已建立的连接。

------------------------------------


Log Entry : 9:48:39 2022年6月13日 

给下位机发送指令异常！您的主机中的软件中止了一个已建立的连接。

------------------------------------


Log Entry : 9:58:41 2022年6月13日 

给下位机发送指令异常！您的主机中的软件中止了一个已建立的连接。

------------------------------------


Log Entry : 10:08:42 2022年6月13日 

给下位机发送指令异常！您的主机中的软件中止了一个已建立的连接。

------------------------------------


Log Entry : 10:18:43 2022年6月13日 

给下位机发送指令异常！您的主机中的软件中止了一个已建立的连接。

------------------------------------


Log Entry : 10:28:44 2022年6月13日 

给下位机发送指令异常！您的主机中的软件中止了一个已建立的连接。

------------------------------------


Log Entry : 10:37:00 2022年6月13日 

处理舱内正常状态数据异常！Timeout expired.  The timeout period elapsed prior to completion of the operation or the server is not responding.

------------------------------------


Log Entry : 10:37:04 2022年6月13日 

定时生成存储文件出现异常！Timeout expired.  The timeout period elapsed prior to completion of the operation or the server is not responding.

------------------------------------


Log Entry : 10:37:07 2022年6月13日 

解析数据采集器1下位机环境参数程序出现异常:Timeout expired.  The timeout period elapsed prior to completion of the operation or the server is not responding.接收到的内容:55AA00012060323032323A30363A31333A31303A33373A33373A303030000000B50000003CD119D5750100000000FFFFFFFF54452B32372E31363923

------------------------------------


Log Entry : 10:38:19 2022年6月13日 

定时生成存储文件出现异常！Timeout expired.  The timeout period elapsed prior to completion of the operation or the server is not responding.

------------------------------------


Log Entry : 10:38:45 2022年6月13日 

给下位机发送指令异常！您的主机中的软件中止了一个已建立的连接。

------------------------------------


Log Entry : 10:38:50 2022年6月13日 

解析数据采集器1下位机环境参数程序出现异常:Timeout expired.  The timeout period elapsed prior to completion of the operation or the server is not responding.接收到的内容:55AA00012060323032323A30363A31333A31303A33393A33313A303030000000BA0000003CD119D5750100000000FFFFFFFF54452B32372E32333523

------------------------------------


Log Entry : 10:38:54 2022年6月13日 

处理舱内正常状态数据异常！Timeout expired.  The timeout period elapsed prior to completion of the operation or the server is not responding.

------------------------------------


Log Entry : 10:39:31 2022年6月13日 

解析数据采集器1下位机环境参数程序出现异常:Timeout expired.  The timeout period elapsed prior to completion of the operation or the server is not responding.接收到的内容:55AA00012060323032323A30363A31333A31303A34303A31363A303030000000BC0000003CD119D5750100000000FFFFFFFF54452B32372E32363123

------------------------------------


Log Entry : 10:39:34 2022年6月13日 

定时生成存储文件出现异常！Timeout expired.  The timeout period elapsed prior to completion of the operation or the server is not responding.

------------------------------------


Log Entry : 10:39:39 2022年6月13日 

处理舱内正常状态数据异常！Timeout expired.  The timeout period elapsed prior to completion of the operation or the server is not responding.

------------------------------------


Log Entry : 10:40:22 2022年6月13日 

解析数据采集器1下位机环境参数程序出现异常:Timeout expired.  The timeout period elapsed prior to completion of the operation or the server is not responding.接收到的内容:55AA00012060323032323A30363A31333A31303A34313A30313A303030000000BE0000003CD119D5750100000000FFFFFFFF54452B32372E32383823

------------------------------------


Log Entry : 10:40:24 2022年6月13日 

处理舱内正常状态数据异常！Timeout expired.  The timeout period elapsed prior to completion of the operation or the server is not responding.

------------------------------------


Log Entry : 10:40:49 2022年6月13日 

定时生成存储文件出现异常！Timeout expired.  The timeout period elapsed prior to completion of the operation or the server is not responding.

------------------------------------


Log Entry : 10:41:01 2022年6月13日 

解析数据采集器1下位机环境参数程序出现异常:Timeout expired.  The timeout period elapsed prior to completion of the operation or the server is not responding.接收到的内容:55AA00012060323032323A30363A31333A31303A34313A34363A303030000000C00000003CD119D5750100000000FFFFFFFF54452B32372E33313523

------------------------------------


Log Entry : 10:41:10 2022年6月13日 

处理舱内正常状态数据异常！Timeout expired.  The timeout period elapsed prior to completion of the operation or the server is not responding.

------------------------------------


Log Entry : 10:41:53 2022年6月13日 

解析数据采集器1下位机环境参数程序出现异常:Timeout expired.  The timeout period elapsed prior to completion of the operation or the server is not responding.接收到的内容:55AA00012060323032323A30363A31333A31303A34323A33313A303030000000C20000003CD119D5750100000000FFFFFFFF54452B32372E33343223

------------------------------------


Log Entry : 10:41:55 2022年6月13日 

处理舱内正常状态数据异常！Timeout expired.  The timeout period elapsed prior to completion of the operation or the server is not responding.

------------------------------------


Log Entry : 10:42:04 2022年6月13日 

定时生成存储文件出现异常！Timeout expired.  The timeout period elapsed prior to completion of the operation or the server is not responding.

------------------------------------


Log Entry : 10:42:32 2022年6月13日 

解析数据采集器1下位机传感器数据程序出现异常:Timeout expired.  The timeout period elapsed prior to completion of the operation or the server is not responding.接收到的内容:55AA00010001323032323A30363A31333A31303A34333A31333A3030300000009100000040365C9A8B0100000000FFFFFFFF4E31244461746130382E31303B23

------------------------------------


Log Entry : 10:42:40 2022年6月13日 

处理舱内正常状态数据异常！Timeout expired.  The timeout period elapsed prior to completion of the operation or the server is not responding.

------------------------------------


Log Entry : 10:43:19 2022年6月13日 

定时生成存储文件出现异常！Timeout expired.  The timeout period elapsed prior to completion of the operation or the server is not responding.

------------------------------------


Log Entry : 10:43:23 2022年6月13日 

解析数据采集器1下位机传感器数据程序出现异常:Timeout expired.  The timeout period elapsed prior to completion of the operation or the server is not responding.接收到的内容:55AA00010001323032323A30363A31333A31303A34333A35333A3030300000009200000040365C9A8B0100000000FFFFFFFF4E31244461746130382E31373B23

------------------------------------


Log Entry : 10:43:26 2022年6月13日 

处理舱内正常状态数据异常！Timeout expired.  The timeout period elapsed prior to completion of the operation or the server is not responding.

------------------------------------


Log Entry : 10:44:02 2022年6月13日 

解析数据采集器1下位机环境参数程序出现异常:Timeout expired.  The timeout period elapsed prior to completion of the operation or the server is not responding.接收到的内容:55AA00012060323032323A30363A31333A31303A34343A34373A303030000000C80000003CD119D5750100000000FFFFFFFF54452B32372E34313923

------------------------------------


Log Entry : 10:44:11 2022年6月13日 

处理舱内正常状态数据异常！Timeout expired.  The timeout period elapsed prior to completion of the operation or the server is not responding.

------------------------------------


Log Entry : 10:44:34 2022年6月13日 

定时生成存储文件出现异常！Timeout expired.  The timeout period elapsed prior to completion of the operation or the server is not responding.

------------------------------------


Log Entry : 10:44:53 2022年6月13日 

解析数据采集器1下位机环境参数程序出现异常:Timeout expired.  The timeout period elapsed prior to completion of the operation or the server is not responding.接收到的内容:55AA00012060323032323A30363A31333A31303A34353A33323A303030000000CA0000003CD119D5750100000000FFFFFFFF54452B32372E34343623

------------------------------------


Log Entry : 10:44:56 2022年6月13日 

处理舱内正常状态数据异常！Timeout expired.  The timeout period elapsed prior to completion of the operation or the server is not responding.

------------------------------------


Log Entry : 10:45:32 2022年6月13日 

解析数据采集器1下位机环境参数程序出现异常:Timeout expired.  The timeout period elapsed prior to completion of the operation or the server is not responding.接收到的内容:55AA00012060323032323A30363A31333A31303A34363A31383A303030000000CC0000003CD119D5750100000000FFFFFFFF54452B32372E34373123

------------------------------------


Log Entry : 10:45:42 2022年6月13日 

处理舱内正常状态数据异常！Timeout expired.  The timeout period elapsed prior to completion of the operation or the server is not responding.

------------------------------------


Log Entry : 10:45:49 2022年6月13日 

定时生成存储文件出现异常！Timeout expired.  The timeout period elapsed prior to completion of the operation or the server is not responding.

------------------------------------


Log Entry : 10:46:24 2022年6月13日 

解析数据采集器1下位机环境参数程序出现异常:Timeout expired.  The timeout period elapsed prior to completion of the operation or the server is not responding.接收到的内容:55AA00012060323032323A30363A31333A31303A34373A30333A303030000000CE0000003CD119D5750100000000FFFFFFFF54452B32372E34393623

------------------------------------


Log Entry : 10:46:27 2022年6月13日 

处理舱内正常状态数据异常！Timeout expired.  The timeout period elapsed prior to completion of the operation or the server is not responding.

------------------------------------


Log Entry : 10:47:03 2022年6月13日 

解析数据采集器1下位机环境参数程序出现异常:Timeout expired.  The timeout period elapsed prior to completion of the operation or the server is not responding.接收到的内容:55AA00012060323032323A30363A31333A31303A34373A34383A303030000000D00000003CD119D5750100000000FFFFFFFF54452B32372E35323323

------------------------------------


Log Entry : 10:47:05 2022年6月13日 

定时生成存储文件出现异常！Timeout expired.  The timeout period elapsed prior to completion of the operation or the server is not responding.

------------------------------------


Log Entry : 10:47:12 2022年6月13日 

处理舱内正常状态数据异常！Timeout expired.  The timeout period elapsed prior to completion of the operation or the server is not responding.

------------------------------------


Log Entry : 10:47:54 2022年6月13日 

解析数据采集器1下位机环境参数程序出现异常:Timeout expired.  The timeout period elapsed prior to completion of the operation or the server is not responding.接收到的内容:55AA00012060323032323A30363A31333A31303A34383A33333A303030000000D20000003CD119D5750100000000FFFFFFFF54452B32372E35343623

------------------------------------


Log Entry : 10:47:58 2022年6月13日 

处理舱内正常状态数据异常！Timeout expired.  The timeout period elapsed prior to completion of the operation or the server is not responding.

------------------------------------


Log Entry : 10:48:20 2022年6月13日 

定时生成存储文件出现异常！Timeout expired.  The timeout period elapsed prior to completion of the operation or the server is not responding.

------------------------------------


Log Entry : 10:48:33 2022年6月13日 

解析数据采集器1下位机传感器数据程序出现异常:Timeout expired.  The timeout period elapsed prior to completion of the operation or the server is not responding.接收到的内容:55AA00010001323032323A30363A31333A31303A34393A31353A3030300000009D00000040365C9A8B0100000000FFFFFFFF4E31244461746130382E32353B23

------------------------------------


Log Entry : 10:48:43 2022年6月13日 

处理舱内正常状态数据异常！Timeout expired.  The timeout period elapsed prior to completion of the operation or the server is not responding.

------------------------------------


Log Entry : 10:48:46 2022年6月13日 

给下位机发送指令异常！您的主机中的软件中止了一个已建立的连接。

------------------------------------


Log Entry : 10:49:25 2022年6月13日 

解析数据采集器1下位机传感器数据程序出现异常:Timeout expired.  The timeout period elapsed prior to completion of the operation or the server is not responding.接收到的内容:55AA00010001323032323A30363A31333A31303A34393A35353A3030300000009E00000040365C9A8B0100000000FFFFFFFF4E31244461746130382E32373B23

------------------------------------


Log Entry : 10:49:28 2022年6月13日 

处理舱内正常状态数据异常！Timeout expired.  The timeout period elapsed prior to completion of the operation or the server is not responding.

------------------------------------


Log Entry : 10:49:35 2022年6月13日 

定时生成存储文件出现异常！Timeout expired.  The timeout period elapsed prior to completion of the operation or the server is not responding.

------------------------------------


Log Entry : 10:50:04 2022年6月13日 

解析数据采集器1下位机环境参数程序出现异常:Timeout expired.  The timeout period elapsed prior to completion of the operation or the server is not responding.接收到的内容:55AA00012060323032323A30363A31333A31303A35303A34393A303030000000D80000003CD119D5750100000000FFFFFFFF54452B32372E36323223

------------------------------------


Log Entry : 10:50:14 2022年6月13日 

处理舱内正常状态数据异常！Timeout expired.  The timeout period elapsed prior to completion of the operation or the server is not responding.

------------------------------------


Log Entry : 10:50:50 2022年6月13日 

定时生成存储文件出现异常！Timeout expired.  The timeout period elapsed prior to completion of the operation or the server is not responding.

------------------------------------


Log Entry : 10:50:55 2022年6月13日 

解析数据采集器1下位机环境参数程序出现异常:Timeout expired.  The timeout period elapsed prior to completion of the operation or the server is not responding.接收到的内容:55AA00012060323032323A30363A31333A31303A35313A33343A303030000000DA0000003CD119D5750100000000FFFFFFFF54452B32372E36343623

------------------------------------


Log Entry : 10:50:59 2022年6月13日 

处理舱内正常状态数据异常！Timeout expired.  The timeout period elapsed prior to completion of the operation or the server is not responding.

------------------------------------


Log Entry : 10:51:34 2022年6月13日 

解析数据采集器1下位机环境参数程序出现异常:Timeout expired.  The timeout period elapsed prior to completion of the operation or the server is not responding.接收到的内容:55AA00012060323032323A30363A31333A31303A35323A31393A303030000000DC0000003CD119D5750100000000FFFFFFFF54452B32372E36373023

------------------------------------


Log Entry : 10:51:44 2022年6月13日 

处理舱内正常状态数据异常！Timeout expired.  The timeout period elapsed prior to completion of the operation or the server is not responding.

------------------------------------


Log Entry : 10:52:05 2022年6月13日 

定时生成存储文件出现异常！Timeout expired.  The timeout period elapsed prior to completion of the operation or the server is not responding.

------------------------------------


Log Entry : 10:52:25 2022年6月13日 

解析数据采集器1下位机环境参数程序出现异常:Timeout expired.  The timeout period elapsed prior to completion of the operation or the server is not responding.接收到的内容:55AA00012060323032323A30363A31333A31303A35333A30353A303030000000DE0000003CD119D5750100000000FFFFFFFF54452B32372E36393623

------------------------------------


Log Entry : 10:52:30 2022年6月13日 

处理舱内正常状态数据异常！Timeout expired.  The timeout period elapsed prior to completion of the operation or the server is not responding.

------------------------------------


Log Entry : 10:53:05 2022年6月13日 

解析数据采集器1下位机环境参数程序出现异常:Timeout expired.  The timeout period elapsed prior to completion of the operation or the server is not responding.接收到的内容:55AA00012060323032323A30363A31333A31303A35333A35303A303030000000E00000003CD119D5750100000000FFFFFFFF54452B32372E37323023

------------------------------------


Log Entry : 10:53:15 2022年6月13日 

处理舱内正常状态数据异常！Timeout expired.  The timeout period elapsed prior to completion of the operation or the server is not responding.

------------------------------------


Log Entry : 10:53:20 2022年6月13日 

定时生成存储文件出现异常！Timeout expired.  The timeout period elapsed prior to completion of the operation or the server is not responding.

------------------------------------


Log Entry : 10:53:56 2022年6月13日 

解析数据采集器1下位机环境参数程序出现异常:Timeout expired.  The timeout period elapsed prior to completion of the operation or the server is not responding.接收到的内容:55AA00012060323032323A30363A31333A31303A35343A33353A303030000000E20000003CD119D5750100000000FFFFFFFF54452B32372E37343423

------------------------------------


Log Entry : 10:54:01 2022年6月13日 

处理舱内正常状态数据异常！Timeout expired.  The timeout period elapsed prior to completion of the operation or the server is not responding.

------------------------------------


Log Entry : 10:54:35 2022年6月13日 

定时生成存储文件出现异常！Timeout expired.  The timeout period elapsed prior to completion of the operation or the server is not responding.

------------------------------------


Log Entry : 10:54:35 2022年6月13日 

解析数据采集器1下位机传感器数据程序出现异常:Timeout expired.  The timeout period elapsed prior to completion of the operation or the server is not responding.接收到的内容:55AA00010001323032323A30363A31333A31303A35353A31373A303030000000A900000040365C9A8B0100000000FFFFFFFF4E31244461746130382E31373B23

------------------------------------


Log Entry : 10:54:46 2022年6月13日 

处理舱内正常状态数据异常！Timeout expired.  The timeout period elapsed prior to completion of the operation or the server is not responding.

------------------------------------


Log Entry : 10:55:26 2022年6月13日 

解析数据采集器1下位机传感器数据程序出现异常:Timeout expired.  The timeout period elapsed prior to completion of the operation or the server is not responding.接收到的内容:55AA00010001323032323A30363A31333A31303A35353A35373A303030000000AA00000040365C9A8B0100000000FFFFFFFF4E31244461746130382E31353B23

------------------------------------


Log Entry : 10:55:31 2022年6月13日 

处理舱内正常状态数据异常！Timeout expired.  The timeout period elapsed prior to completion of the operation or the server is not responding.

------------------------------------


Log Entry : 10:55:50 2022年6月13日 

定时生成存储文件出现异常！Timeout expired.  The timeout period elapsed prior to completion of the operation or the server is not responding.

------------------------------------


Log Entry : 10:56:06 2022年6月13日 

解析数据采集器1下位机环境参数程序出现异常:Timeout expired.  The timeout period elapsed prior to completion of the operation or the server is not responding.接收到的内容:55AA00012060323032323A30363A31333A31303A35363A35313A303030000000E80000003CD119D5750100000000FFFFFFFF54452B32372E38323023

------------------------------------


Log Entry : 10:56:17 2022年6月13日 

处理舱内正常状态数据异常！Timeout expired.  The timeout period elapsed prior to completion of the operation or the server is not responding.

------------------------------------


Log Entry : 10:56:57 2022年6月13日 

解析数据采集器1下位机环境参数程序出现异常:Timeout expired.  The timeout period elapsed prior to completion of the operation or the server is not responding.接收到的内容:55AA00012060323032323A30363A31333A31303A35373A33363A303030000000EA0000003CD119D5750100000000FFFFFFFF54452B32372E38343323

------------------------------------


Log Entry : 10:57:02 2022年6月13日 

处理舱内正常状态数据异常！Timeout expired.  The timeout period elapsed prior to completion of the operation or the server is not responding.

------------------------------------


Log Entry : 10:57:05 2022年6月13日 

定时生成存储文件出现异常！Timeout expired.  The timeout period elapsed prior to completion of the operation or the server is not responding.

------------------------------------


Log Entry : 10:57:36 2022年6月13日 

解析数据采集器1下位机环境参数程序出现异常:Timeout expired.  The timeout period elapsed prior to completion of the operation or the server is not responding.接收到的内容:55AA00012060323032323A30363A31333A31303A35383A32313A303030000000EC0000003CD119D5750100000000FFFFFFFF54452B32372E38363523

------------------------------------


Log Entry : 10:57:47 2022年6月13日 

处理舱内正常状态数据异常！Timeout expired.  The timeout period elapsed prior to completion of the operation or the server is not responding.

------------------------------------


Log Entry : 10:58:20 2022年6月13日 

定时生成存储文件出现异常！Timeout expired.  The timeout period elapsed prior to completion of the operation or the server is not responding.

------------------------------------


Log Entry : 10:58:27 2022年6月13日 

解析数据采集器1下位机环境参数程序出现异常:Timeout expired.  The timeout period elapsed prior to completion of the operation or the server is not responding.接收到的内容:55AA00012060323032323A30363A31333A31303A35393A30363A303030000000EE0000003CD119D5750100000000FFFFFFFF54452B32372E38383823

------------------------------------


Log Entry : 10:58:33 2022年6月13日 

处理舱内正常状态数据异常！Timeout expired.  The timeout period elapsed prior to completion of the operation or the server is not responding.

------------------------------------


Log Entry : 10:58:47 2022年6月13日 

给下位机发送指令异常！您的主机中的软件中止了一个已建立的连接。

------------------------------------


Log Entry : 10:59:06 2022年6月13日 

解析数据采集器1下位机环境参数程序出现异常:Timeout expired.  The timeout period elapsed prior to completion of the operation or the server is not responding.接收到的内容:55AA00012060323032323A30363A31333A31303A35393A35323A303030000000F00000003CD119D5750100000000FFFFFFFF54452B32372E39313223

------------------------------------


Log Entry : 10:59:18 2022年6月13日 

处理舱内正常状态数据异常！Timeout expired.  The timeout period elapsed prior to completion of the operation or the server is not responding.

------------------------------------


Log Entry : 10:59:35 2022年6月13日 

定时生成存储文件出现异常！Timeout expired.  The timeout period elapsed prior to completion of the operation or the server is not responding.

------------------------------------


Log Entry : 10:59:58 2022年6月13日 

解析数据采集器1下位机环境参数程序出现异常:Timeout expired.  The timeout period elapsed prior to completion of the operation or the server is not responding.接收到的内容:55AA00012060323032323A30363A31333A31313A30303A33373A303030000000F20000003CD119D5750100000000FFFFFFFF54452B32372E39333523

------------------------------------


Log Entry : 11:00:03 2022年6月13日 

处理舱内正常状态数据异常！Timeout expired.  The timeout period elapsed prior to completion of the operation or the server is not responding.

------------------------------------


Log Entry : 11:00:37 2022年6月13日 

解析数据采集器1下位机传感器数据程序出现异常:Timeout expired.  The timeout period elapsed prior to completion of the operation or the server is not responding.接收到的内容:55AA00010001323032323A30363A31333A31313A30313A31393A303030000000B500000040365C9A8B0100000000FFFFFFFF4E31244461746130382E31313B23

------------------------------------


Log Entry : 11:00:49 2022年6月13日 

处理舱内正常状态数据异常！Timeout expired.  The timeout period elapsed prior to completion of the operation or the server is not responding.

------------------------------------


Log Entry : 11:00:50 2022年6月13日 

定时生成存储文件出现异常！Timeout expired.  The timeout period elapsed prior to completion of the operation or the server is not responding.

------------------------------------


Log Entry : 11:01:28 2022年6月13日 

解析数据采集器1下位机传感器数据程序出现异常:Timeout expired.  The timeout period elapsed prior to completion of the operation or the server is not responding.接收到的内容:55AA00010001323032323A30363A31333A31313A30313A35393A303030000000B600000040365C9A8B0100000000FFFFFFFF4E31244461746130382E30363B23

------------------------------------


Log Entry : 11:01:34 2022年6月13日 

处理舱内正常状态数据异常！Timeout expired.  The timeout period elapsed prior to completion of the operation or the server is not responding.

------------------------------------


Log Entry : 11:02:05 2022年6月13日 

定时生成存储文件出现异常！Timeout expired.  The timeout period elapsed prior to completion of the operation or the server is not responding.

------------------------------------


Log Entry : 11:02:07 2022年6月13日 

解析数据采集器1下位机环境参数程序出现异常:Timeout expired.  The timeout period elapsed prior to completion of the operation or the server is not responding.接收到的内容:55AA00012060323032323A30363A31333A31313A30323A35323A303030000000F80000003CD119D5750100000000FFFFFFFF54452B32382E30303423

------------------------------------


Log Entry : 11:02:20 2022年6月13日 

处理舱内正常状态数据异常！Timeout expired.  The timeout period elapsed prior to completion of the operation or the server is not responding.

------------------------------------


Log Entry : 11:02:59 2022年6月13日 

解析数据采集器1下位机环境参数程序出现异常:Timeout expired.  The timeout period elapsed prior to completion of the operation or the server is not responding.接收到的内容:55AA00012060323032323A30363A31333A31313A30333A33383A303030000000FA0000003CD119D5750100000000FFFFFFFF54452B32382E30323723

------------------------------------


Log Entry : 11:03:05 2022年6月13日 

处理舱内正常状态数据异常！Timeout expired.  The timeout period elapsed prior to completion of the operation or the server is not responding.

------------------------------------


Log Entry : 11:03:20 2022年6月13日 

定时生成存储文件出现异常！Timeout expired.  The timeout period elapsed prior to completion of the operation or the server is not responding.

------------------------------------


Log Entry : 11:03:38 2022年6月13日 

解析数据采集器1下位机环境参数程序出现异常:Timeout expired.  The timeout period elapsed prior to completion of the operation or the server is not responding.接收到的内容:55AA00012060323032323A30363A31333A31313A30343A32333A303030000000FC0000003CD119D5750100000000FFFFFFFF54452B32382E30353123

------------------------------------


Log Entry : 11:03:50 2022年6月13日 

处理舱内正常状态数据异常！Timeout expired.  The timeout period elapsed prior to completion of the operation or the server is not responding.

------------------------------------


Log Entry : 11:04:29 2022年6月13日 

解析数据采集器1下位机环境参数程序出现异常:Timeout expired.  The timeout period elapsed prior to completion of the operation or the server is not responding.接收到的内容:55AA00012060323032323A30363A31333A31313A30353A30383A303030000000FE0000003CD119D5750100000000FFFFFFFF54452B32382E30373023

------------------------------------


Log Entry : 11:04:36 2022年6月13日 

定时生成存储文件出现异常！Timeout expired.  The timeout period elapsed prior to completion of the operation or the server is not responding.

------------------------------------


Log Entry : 11:04:36 2022年6月13日 

处理舱内正常状态数据异常！Timeout expired.  The timeout period elapsed prior to completion of the operation or the server is not responding.

------------------------------------


Log Entry : 11:05:08 2022年6月13日 

解析数据采集器1下位机环境参数程序出现异常:Timeout expired.  The timeout period elapsed prior to completion of the operation or the server is not responding.接收到的内容:55AA00012060323032323A30363A31333A31313A30353A35333A303030000001000000003CD119D5750100000000FFFFFFFF54452B32382E30393323

------------------------------------


Log Entry : 11:05:21 2022年6月13日 

处理舱内正常状态数据异常！Timeout expired.  The timeout period elapsed prior to completion of the operation or the server is not responding.

------------------------------------


Log Entry : 11:05:51 2022年6月13日 

定时生成存储文件出现异常！Timeout expired.  The timeout period elapsed prior to completion of the operation or the server is not responding.

------------------------------------


Log Entry : 11:06:00 2022年6月13日 

解析数据采集器1下位机环境参数程序出现异常:Timeout expired.  The timeout period elapsed prior to completion of the operation or the server is not responding.接收到的内容:55AA00012060323032323A30363A31333A31313A30363A33393A303030000001020000003CD119D5750100000000FFFFFFFF54452B32382E31313623

------------------------------------


Log Entry : 11:06:06 2022年6月13日 

处理舱内正常状态数据异常！Timeout expired.  The timeout period elapsed prior to completion of the operation or the server is not responding.

------------------------------------


Log Entry : 11:06:39 2022年6月13日 

解析数据采集器1下位机传感器数据程序出现异常:Timeout expired.  The timeout period elapsed prior to completion of the operation or the server is not responding.接收到的内容:55AA00010001323032323A30363A31333A31313A30373A32313A303030000000C100000040365C9A8B0100000000FFFFFFFF4E31244461746130372E39363B23

------------------------------------


Log Entry : 11:06:52 2022年6月13日 

处理舱内正常状态数据异常！Timeout expired.  The timeout period elapsed prior to completion of the operation or the server is not responding.

------------------------------------


Log Entry : 11:07:06 2022年6月13日 

定时生成存储文件出现异常！Timeout expired.  The timeout period elapsed prior to completion of the operation or the server is not responding.

------------------------------------


Log Entry : 11:07:30 2022年6月13日 

解析数据采集器1下位机传感器数据程序出现异常:Timeout expired.  The timeout period elapsed prior to completion of the operation or the server is not responding.接收到的内容:55AA00010001323032323A30363A31333A31313A30383A30313A303030000000C200000040365C9A8B0100000000FFFFFFFF4E31244461746130382E30313B23

------------------------------------


Log Entry : 11:07:37 2022年6月13日 

处理舱内正常状态数据异常！Timeout expired.  The timeout period elapsed prior to completion of the operation or the server is not responding.

------------------------------------


Log Entry : 11:08:09 2022年6月13日 

解析数据采集器1下位机环境参数程序出现异常:Timeout expired.  The timeout period elapsed prior to completion of the operation or the server is not responding.接收到的内容:55AA00012060323032323A30363A31333A31313A30383A35343A303030000001080000003CD119D5750100000000FFFFFFFF54452B32382E31373823

------------------------------------


Log Entry : 11:08:21 2022年6月13日 

定时生成存储文件出现异常！Timeout expired.  The timeout period elapsed prior to completion of the operation or the server is not responding.

------------------------------------


Log Entry : 11:08:22 2022年6月13日 

处理舱内正常状态数据异常！Timeout expired.  The timeout period elapsed prior to completion of the operation or the server is not responding.

------------------------------------


Log Entry : 11:08:48 2022年6月13日 

给下位机发送指令异常！您的主机中的软件中止了一个已建立的连接。

------------------------------------


Log Entry : 11:09:00 2022年6月13日 

解析数据采集器1下位机传感器数据程序出现异常:Timeout expired.  The timeout period elapsed prior to completion of the operation or the server is not responding.接收到的内容:55AA00010001323032323A30363A31333A31313A30393A33313A303030000000C500000040365C9A8B0100000000FFFFFFFF4E31244461746130382E30363B23

------------------------------------


Log Entry : 11:09:08 2022年6月13日 

处理舱内正常状态数据异常！Timeout expired.  The timeout period elapsed prior to completion of the operation or the server is not responding.

------------------------------------


Log Entry : 11:09:36 2022年6月13日 

定时生成存储文件出现异常！Timeout expired.  The timeout period elapsed prior to completion of the operation or the server is not responding.

------------------------------------


Log Entry : 11:09:40 2022年6月13日 

解析数据采集器1下位机环境参数程序出现异常:Timeout expired.  The timeout period elapsed prior to completion of the operation or the server is not responding.接收到的内容:55AA00012060323032323A30363A31333A31313A31303A32353A3030300000010C0000003CD119D5750100000000FFFFFFFF54452B32382E32323123

------------------------------------


Log Entry : 11:09:53 2022年6月13日 

处理舱内正常状态数据异常！Timeout expired.  The timeout period elapsed prior to completion of the operation or the server is not responding.

------------------------------------


Log Entry : 11:10:31 2022年6月13日 

解析数据采集器1下位机环境参数程序出现异常:Timeout expired.  The timeout period elapsed prior to completion of the operation or the server is not responding.接收到的内容:55AA00012060323032323A30363A31333A31313A31313A31303A3030300000010E0000003CD119D5750100000000FFFFFFFF54452B32382E32343323

------------------------------------


Log Entry : 11:10:38 2022年6月13日 

处理舱内正常状态数据异常！Timeout expired.  The timeout period elapsed prior to completion of the operation or the server is not responding.

------------------------------------


Log Entry : 11:10:51 2022年6月13日 

定时生成存储文件出现异常！Timeout expired.  The timeout period elapsed prior to completion of the operation or the server is not responding.

------------------------------------


Log Entry : 11:11:10 2022年6月13日 

解析数据采集器1下位机环境参数程序出现异常:Timeout expired.  The timeout period elapsed prior to completion of the operation or the server is not responding.接收到的内容:55AA00012060323032323A30363A31333A31313A31313A35353A303030000001100000003CD119D5750100000000FFFFFFFF54452B32382E32363223

------------------------------------


Log Entry : 11:11:24 2022年6月13日 

处理舱内正常状态数据异常！Timeout expired.  The timeout period elapsed prior to completion of the operation or the server is not responding.

------------------------------------


Log Entry : 11:12:01 2022年6月13日 

解析数据采集器1下位机环境参数程序出现异常:Timeout expired.  The timeout period elapsed prior to completion of the operation or the server is not responding.接收到的内容:55AA00012060323032323A30363A31333A31313A31323A34303A303030000001120000003CD119D5750100000000FFFFFFFF54452B32382E32383523

------------------------------------


Log Entry : 11:12:06 2022年6月13日 

定时生成存储文件出现异常！Timeout expired.  The timeout period elapsed prior to completion of the operation or the server is not responding.

------------------------------------


Log Entry : 11:12:09 2022年6月13日 

处理舱内正常状态数据异常！Timeout expired.  The timeout period elapsed prior to completion of the operation or the server is not responding.

------------------------------------


Log Entry : 11:12:40 2022年6月13日 

解析数据采集器1下位机传感器数据程序出现异常:Timeout expired.  The timeout period elapsed prior to completion of the operation or the server is not responding.接收到的内容:55AA00010001323032323A30363A31333A31313A31333A32333A303030000000CC00000040365C9A8B0100000000FFFFFFFF4E31244461746130382E30363B23

------------------------------------


Log Entry : 11:12:55 2022年6月13日 

处理舱内正常状态数据异常！Timeout expired.  The timeout period elapsed prior to completion of the operation or the server is not responding.

------------------------------------


Log Entry : 11:13:21 2022年6月13日 

定时生成存储文件出现异常！Timeout expired.  The timeout period elapsed prior to completion of the operation or the server is not responding.

------------------------------------


Log Entry : 11:13:32 2022年6月13日 

解析数据采集器1下位机传感器数据程序出现异常:Timeout expired.  The timeout period elapsed prior to completion of the operation or the server is not responding.接收到的内容:55AA00010001323032323A30363A31333A31313A31343A30333A303030000000CE00000040365C9A8B0100000000FFFFFFFF4E31244461746130382E30393B23

------------------------------------


Log Entry : 11:13:40 2022年6月13日 

处理舱内正常状态数据异常！Timeout expired.  The timeout period elapsed prior to completion of the operation or the server is not responding.

------------------------------------


Log Entry : 11:14:11 2022年6月13日 

解析数据采集器1下位机环境参数程序出现异常:Timeout expired.  The timeout period elapsed prior to completion of the operation or the server is not responding.接收到的内容:55AA00012060323032323A30363A31333A31313A31343A35363A303030000001180000003CD119D5750100000000FFFFFFFF54452B32382E33343323

------------------------------------


Log Entry : 11:14:25 2022年6月13日 

处理舱内正常状态数据异常！Timeout expired.  The timeout period elapsed prior to completion of the operation or the server is not responding.

------------------------------------


Log Entry : 11:14:36 2022年6月13日 

定时生成存储文件出现异常！Timeout expired.  The timeout period elapsed prior to completion of the operation or the server is not responding.

------------------------------------


Log Entry : 11:15:02 2022年6月13日 

解析数据采集器1下位机传感器数据程序出现异常:Timeout expired.  The timeout period elapsed prior to completion of the operation or the server is not responding.接收到的内容:55AA00010001323032323A30363A31333A31313A31353A33323A303030000000D100000040365C9A8B0100000000FFFFFFFF4E31244461746130382E30373B23

------------------------------------


Log Entry : 11:15:11 2022年6月13日 

处理舱内正常状态数据异常！Timeout expired.  The timeout period elapsed prior to completion of the operation or the server is not responding.

------------------------------------


Log Entry : 11:15:41 2022年6月13日 

解析数据采集器1下位机环境参数程序出现异常:Timeout expired.  The timeout period elapsed prior to completion of the operation or the server is not responding.接收到的内容:55AA00012060323032323A30363A31333A31313A31363A32373A3030300000011C0000003CD119D5750100000000FFFFFFFF54452B32382E33383523

------------------------------------


Log Entry : 11:15:51 2022年6月13日 

定时生成存储文件出现异常！Timeout expired.  The timeout period elapsed prior to completion of the operation or the server is not responding.

------------------------------------


Log Entry : 11:15:56 2022年6月13日 

处理舱内正常状态数据异常！Timeout expired.  The timeout period elapsed prior to completion of the operation or the server is not responding.

------------------------------------


Log Entry : 11:16:33 2022年6月13日 

解析数据采集器1下位机环境参数程序出现异常:Timeout expired.  The timeout period elapsed prior to completion of the operation or the server is not responding.接收到的内容:55AA00012060323032323A30363A31333A31313A31373A31323A3030300000011E0000003CD119D5750100000000FFFFFFFF54452B32382E34303523

------------------------------------


Log Entry : 11:16:41 2022年6月13日 

处理舱内正常状态数据异常！Timeout expired.  The timeout period elapsed prior to completion of the operation or the server is not responding.

------------------------------------


Log Entry : 11:17:06 2022年6月13日 

定时生成存储文件出现异常！Timeout expired.  The timeout period elapsed prior to completion of the operation or the server is not responding.

------------------------------------


Log Entry : 11:17:12 2022年6月13日 

解析数据采集器1下位机环境参数程序出现异常:Timeout expired.  The timeout period elapsed prior to completion of the operation or the server is not responding.接收到的内容:55AA00012060323032323A30363A31333A31313A31373A35373A303030000001200000003CD119D5750100000000FFFFFFFF54452B32382E34323423

------------------------------------


Log Entry : 11:17:27 2022年6月13日 

处理舱内正常状态数据异常！Timeout expired.  The timeout period elapsed prior to completion of the operation or the server is not responding.

------------------------------------


Log Entry : 11:18:03 2022年6月13日 

解析数据采集器1下位机环境参数程序出现异常:Timeout expired.  The timeout period elapsed prior to completion of the operation or the server is not responding.接收到的内容:55AA00012060323032323A30363A31333A31313A31383A34323A303030000001220000003CD119D5750100000000FFFFFFFF54452B32382E34343323

------------------------------------


Log Entry : 11:18:12 2022年6月13日 

处理舱内正常状态数据异常！Timeout expired.  The timeout period elapsed prior to completion of the operation or the server is not responding.

------------------------------------


Log Entry : 11:18:21 2022年6月13日 

定时生成存储文件出现异常！Timeout expired.  The timeout period elapsed prior to completion of the operation or the server is not responding.

------------------------------------


Log Entry : 11:18:42 2022年6月13日 

解析数据采集器1下位机传感器数据程序出现异常:Timeout expired.  The timeout period elapsed prior to completion of the operation or the server is not responding.接收到的内容:55AA00010001323032323A30363A31333A31313A31393A32353A303030000000D800000040365C9A8B0100000000FFFFFFFF4E31244461746130382E30343B23

------------------------------------


Log Entry : 11:18:49 2022年6月13日 

给下位机发送指令异常！您的主机中的软件中止了一个已建立的连接。

------------------------------------


Log Entry : 11:19:21 2022年6月13日 

解析数据采集器1下位机传感器数据程序出现异常:Timeout expired.  The timeout period elapsed prior to completion of the operation or the server is not responding.接收到的内容:55AA00010001323032323A30363A31333A31313A32303A30353A303030000000DA00000040365C9A8B0100000000FFFFFFFF4E31244461746130382E30363B23

------------------------------------


Log Entry : 11:19:21 2022年6月13日 

处理舱内正常状态数据异常！Timeout expired.  The timeout period elapsed prior to completion of the operation or the server is not responding.

------------------------------------


Log Entry : 11:19:36 2022年6月13日 

定时生成存储文件出现异常！Timeout expired.  The timeout period elapsed prior to completion of the operation or the server is not responding.

------------------------------------


Log Entry : 11:19:49 2022年6月13日 

处理舱内正常状态数据异常！Timeout expired.  The timeout period elapsed prior to completion of the operation or the server is not responding.

------------------------------------


Log Entry : 11:19:50 2022年6月13日 

解析数据采集器1下位机环境参数程序出现异常:Timeout expired.  The timeout period elapsed prior to completion of the operation or the server is not responding.接收到的内容:55AA00012060323032323A30363A31333A31313A32303A33353A303030000001270000003CD119D5750100000000FFFFFFFF54452B32382E34383923

------------------------------------


Log Entry : 11:20:40 2022年6月13日 

解析数据采集器1下位机环境参数程序出现异常:Timeout expired.  The timeout period elapsed prior to completion of the operation or the server is not responding.接收到的内容:55AA00012060323032323A30363A31333A31313A32313A32313A303030000001290000003CD119D5750100000000FFFFFFFF54452B32382E35303923

------------------------------------


Log Entry : 11:20:40 2022年6月13日 

处理舱内正常状态数据异常！Timeout expired.  The timeout period elapsed prior to completion of the operation or the server is not responding.

------------------------------------


Log Entry : 11:20:51 2022年6月13日 

定时生成存储文件出现异常！Timeout expired.  The timeout period elapsed prior to completion of the operation or the server is not responding.

------------------------------------


Log Entry : 11:21:21 2022年6月13日 

解析数据采集器1下位机环境参数程序出现异常:Timeout expired.  The timeout period elapsed prior to completion of the operation or the server is not responding.接收到的内容:55AA00012060323032323A30363A31333A31313A32323A30363A3030300000012B0000003CD119D5750100000000FFFFFFFF54452B32382E35323823

------------------------------------


Log Entry : 11:22:00 2022年6月13日 

处理舱内正常状态数据异常！Timeout expired.  The timeout period elapsed prior to completion of the operation or the server is not responding.

------------------------------------


Log Entry : 11:22:01 2022年6月13日 

解析数据采集器1下位机传感器数据程序出现异常:Timeout expired.  The timeout period elapsed prior to completion of the operation or the server is not responding.接收到的内容:55AA00010001323032323A30363A31333A31313A32323A34363A303030000000DF00000040365C9A8B0100000000FFFFFFFF4E31244461746130382E31373B23

------------------------------------


Log Entry : 11:22:07 2022年6月13日 

定时生成存储文件出现异常！Timeout expired.  The timeout period elapsed prior to completion of the operation or the server is not responding.

------------------------------------


Log Entry : 11:22:28 2022年6月13日 

处理舱内正常状态数据异常！Timeout expired.  The timeout period elapsed prior to completion of the operation or the server is not responding.

------------------------------------


Log Entry : 11:22:41 2022年6月13日 

解析数据采集器1下位机传感器数据程序出现异常:Timeout expired.  The timeout period elapsed prior to completion of the operation or the server is not responding.接收到的内容:55AA00010001323032323A30363A31333A31313A32333A32363A303030000000E000000040365C9A8B0100000000FFFFFFFF4E31244461746130382E32323B23

------------------------------------


Log Entry : 11:23:20 2022年6月13日 

解析数据采集器1下位机环境参数程序出现异常:Timeout expired.  The timeout period elapsed prior to completion of the operation or the server is not responding.接收到的内容:55AA00012060323032323A30363A31333A31313A32333A35393A303030000001300000003CD119D5750100000000FFFFFFFF54452B32382E35373423

------------------------------------


Log Entry : 11:23:20 2022年6月13日 

处理舱内正常状态数据异常！Timeout expired.  The timeout period elapsed prior to completion of the operation or the server is not responding.

------------------------------------


Log Entry : 11:23:22 2022年6月13日 

定时生成存储文件出现异常！Timeout expired.  The timeout period elapsed prior to completion of the operation or the server is not responding.

------------------------------------


Log Entry : 11:23:59 2022年6月13日 

处理舱内正常状态数据异常！Timeout expired.  The timeout period elapsed prior to completion of the operation or the server is not responding.

------------------------------------


Log Entry : 11:24:02 2022年6月13日 

解析数据采集器1下位机传感器数据程序出现异常:Timeout expired.  The timeout period elapsed prior to completion of the operation or the server is not responding.接收到的内容:55AA00010001323032323A30363A31333A31313A32343A34373A303030000000E300000040365C9A8B0100000000FFFFFFFF4E31244461746130382E30323B23

------------------------------------


Log Entry : 11:24:37 2022年6月13日 

定时生成存储文件出现异常！Timeout expired.  The timeout period elapsed prior to completion of the operation or the server is not responding.

------------------------------------


Log Entry : 11:24:51 2022年6月13日 

解析数据采集器1下位机传感器数据程序出现异常:Timeout expired.  The timeout period elapsed prior to completion of the operation or the server is not responding.接收到的内容:55AA00010001323032323A30363A31333A31313A32353A32373A303030000000E400000040365C9A8B0100000000FFFFFFFF4E31244461746130382E30373B23

------------------------------------


Log Entry : 11:24:51 2022年6月13日 

处理舱内正常状态数据异常！Timeout expired.  The timeout period elapsed prior to completion of the operation or the server is not responding.

------------------------------------


Log Entry : 11:25:30 2022年6月13日 

解析数据采集器1下位机传感器数据程序出现异常:Timeout expired.  The timeout period elapsed prior to completion of the operation or the server is not responding.接收到的内容:55AA00010001323032323A30363A31333A31313A32363A30373A303030000000E600000040365C9A8B0100000000FFFFFFFF4E31244461746130382E30363B23

------------------------------------


Log Entry : 11:25:52 2022年6月13日 

定时生成存储文件出现异常！Timeout expired.  The timeout period elapsed prior to completion of the operation or the server is not responding.

------------------------------------


Log Entry : 11:26:09 2022年6月13日 

解析数据采集器1下位机传感器数据程序出现异常:Timeout expired.  The timeout period elapsed prior to completion of the operation or the server is not responding.接收到的内容:55AA00010001323032323A30363A31333A31313A32363A34373A303030000000E700000040365C9A8B0100000000FFFFFFFF4E31244461746130382E30353B23

------------------------------------


Log Entry : 11:26:09 2022年6月13日 

处理舱内正常状态数据异常！Timeout expired.  The timeout period elapsed prior to completion of the operation or the server is not responding.

------------------------------------


Log Entry : 11:26:36 2022年6月13日 

处理舱内正常状态数据异常！Timeout expired.  The timeout period elapsed prior to completion of the operation or the server is not responding.

------------------------------------


Log Entry : 11:26:37 2022年6月13日 

解析数据采集器1下位机环境参数程序出现异常:Timeout expired.  The timeout period elapsed prior to completion of the operation or the server is not responding.接收到的内容:55AA00012060323032323A30363A31333A31313A32373A32333A303030000001390000003CD119D5750100000000FFFFFFFF54452B32382E36353523

------------------------------------


Log Entry : 11:27:07 2022年6月13日 

定时生成存储文件出现异常！Timeout expired.  The timeout period elapsed prior to completion of the operation or the server is not responding.

------------------------------------


Log Entry : 11:27:27 2022年6月13日 

处理舱内正常状态数据异常！Timeout expired.  The timeout period elapsed prior to completion of the operation or the server is not responding.

------------------------------------


Log Entry : 11:27:27 2022年6月13日 

解析数据采集器1下位机传感器数据程序出现异常:Timeout expired.  The timeout period elapsed prior to completion of the operation or the server is not responding.接收到的内容:55AA00010001323032323A30363A31333A31313A32383A30383A303030000000EA00000040365C9A8B0100000000FFFFFFFF4E31244461746130382E31333B23

------------------------------------


Log Entry : 11:28:07 2022年6月13日 

处理舱内正常状态数据异常！Timeout expired.  The timeout period elapsed prior to completion of the operation or the server is not responding.

------------------------------------


Log Entry : 11:28:08 2022年6月13日 

解析数据采集器1下位机环境参数程序出现异常:Timeout expired.  The timeout period elapsed prior to completion of the operation or the server is not responding.接收到的内容:55AA00012060323032323A30363A31333A31313A32383A35333A3030300000013D0000003CD119D5750100000000FFFFFFFF54452B32382E36393023

------------------------------------


Log Entry : 11:28:22 2022年6月13日 

定时生成存储文件出现异常！Timeout expired.  The timeout period elapsed prior to completion of the operation or the server is not responding.

------------------------------------


Log Entry : 11:28:50 2022年6月13日 

给下位机发送指令异常！您的主机中的软件中止了一个已建立的连接。

------------------------------------


Log Entry : 11:28:58 2022年6月13日 

解析数据采集器1下位机传感器数据程序出现异常:Timeout expired.  The timeout period elapsed prior to completion of the operation or the server is not responding.接收到的内容:55AA00010001323032323A30363A31333A31313A32393A33333A303030000000ED00000040365C9A8B0100000000FFFFFFFF4E31244461746130382E30373B23

------------------------------------


Log Entry : 11:28:58 2022年6月13日 

处理舱内正常状态数据异常！Timeout expired.  The timeout period elapsed prior to completion of the operation or the server is not responding.

------------------------------------


Log Entry : 11:29:37 2022年6月13日 

定时生成存储文件出现异常！Timeout expired.  The timeout period elapsed prior to completion of the operation or the server is not responding.

------------------------------------


Log Entry : 11:29:38 2022年6月13日 

解析数据采集器1下位机环境参数程序出现异常:Timeout expired.  The timeout period elapsed prior to completion of the operation or the server is not responding.接收到的内容:55AA00012060323032323A30363A31333A31313A33303A32333A303030000001410000003CD119D5750100000000FFFFFFFF54452B32382E37323023

------------------------------------


Log Entry : 11:30:18 2022年6月13日 

处理舱内正常状态数据异常！Timeout expired.  The timeout period elapsed prior to completion of the operation or the server is not responding.

------------------------------------


Log Entry : 11:30:33 2022年6月13日 

解析数据采集器1下位机环境参数程序出现异常:Timeout expired.  The timeout period elapsed prior to completion of the operation or the server is not responding.接收到的内容:55AA00012060323032323A30363A31333A31313A33313A30393A303030000001430000003CD119D5750100000000FFFFFFFF54452B32382E37343023

------------------------------------


Log Entry : 11:30:40 2022年6月13日 

处理舱内正常状态数据异常！Timeout expired.  The timeout period elapsed prior to completion of the operation or the server is not responding.

------------------------------------


Log Entry : 11:30:52 2022年6月13日 

定时生成存储文件出现异常！Timeout expired.  The timeout period elapsed prior to completion of the operation or the server is not responding.

------------------------------------


Log Entry : 11:31:12 2022年6月13日 

解析数据采集器1下位机环境参数程序出现异常:Timeout expired.  The timeout period elapsed prior to completion of the operation or the server is not responding.接收到的内容:55AA00012060323032323A30363A31333A31313A33313A35343A303030000001450000003CD119D5750100000000FFFFFFFF54452B32382E37353523

------------------------------------


Log Entry : 11:31:42 2022年6月13日 

处理舱内正常状态数据异常！Timeout expired.  The timeout period elapsed prior to completion of the operation or the server is not responding.

------------------------------------


Log Entry : 11:31:57 2022年6月13日 

解析数据采集器1下位机环境参数程序出现异常:Timeout expired.  The timeout period elapsed prior to completion of the operation or the server is not responding.接收到的内容:55AA00012060323032323A30363A31333A31313A33323A33393A303030000001470000003CD119D5750100000000FFFFFFFF54452B32382E37373023

------------------------------------


Log Entry : 11:32:07 2022年6月13日 

定时生成存储文件出现异常！Timeout expired.  The timeout period elapsed prior to completion of the operation or the server is not responding.

------------------------------------


Log Entry : 11:32:11 2022年6月13日 

处理舱内正常状态数据异常！Timeout expired.  The timeout period elapsed prior to completion of the operation or the server is not responding.

------------------------------------


Log Entry : 11:32:39 2022年6月13日 

解析数据采集器1下位机环境参数程序出现异常:Timeout expired.  The timeout period elapsed prior to completion of the operation or the server is not responding.接收到的内容:55AA00012060323032323A30363A31333A31313A33333A32343A303030000001490000003CD119D5750100000000FFFFFFFF54452B32382E37383623

------------------------------------


Log Entry : 11:33:07 2022年6月13日 

处理舱内正常状态数据异常！Timeout expired.  The timeout period elapsed prior to completion of the operation or the server is not responding.

------------------------------------


Log Entry : 11:33:22 2022年6月13日 

定时生成存储文件出现异常！Timeout expired.  The timeout period elapsed prior to completion of the operation or the server is not responding.

------------------------------------


Log Entry : 11:33:34 2022年6月13日 

解析数据采集器1下位机传感器数据程序出现异常:Timeout expired.  The timeout period elapsed prior to completion of the operation or the server is not responding.接收到的内容:55AA00010001323032323A30363A31333A31313A33343A31303A303030000000F600000040365C9A8B0100000000FFFFFFFF4E31244461746130382E30353B23

------------------------------------


Log Entry : 11:33:42 2022年6月13日 

处理舱内正常状态数据异常！Timeout expired.  The timeout period elapsed prior to completion of the operation or the server is not responding.

------------------------------------


Log Entry : 11:34:25 2022年6月13日 

解析数据采集器1下位机传感器数据程序出现异常:Timeout expired.  The timeout period elapsed prior to completion of the operation or the server is not responding.接收到的内容:55AA00010001323032323A30363A31333A31313A33343A35303A303030000000F700000040365C9A8B0100000000FFFFFFFF4E31244461746130372E39393B23

------------------------------------


Log Entry : 11:34:27 2022年6月13日 

处理舱内正常状态数据异常！Timeout expired.  The timeout period elapsed prior to completion of the operation or the server is not responding.

------------------------------------


Log Entry : 11:34:37 2022年6月13日 

定时生成存储文件出现异常！Timeout expired.  The timeout period elapsed prior to completion of the operation or the server is not responding.

------------------------------------


Log Entry : 11:35:04 2022年6月13日 

解析数据采集器1下位机环境参数程序出现异常:Timeout expired.  The timeout period elapsed prior to completion of the operation or the server is not responding.接收到的内容:55AA00012060323032323A30363A31333A31313A33353A34303A3030300000014F0000003CD119D5750100000000FFFFFFFF54452B32382E38333623

------------------------------------


Log Entry : 11:35:13 2022年6月13日 

处理舱内正常状态数据异常！Timeout expired.  The timeout period elapsed prior to completion of the operation or the server is not responding.

------------------------------------


Log Entry : 11:35:52 2022年6月13日 

定时生成存储文件出现异常！Timeout expired.  The timeout period elapsed prior to completion of the operation or the server is not responding.

------------------------------------


Log Entry : 11:35:56 2022年6月13日 

解析数据采集器1下位机环境参数程序出现异常:Timeout expired.  The timeout period elapsed prior to completion of the operation or the server is not responding.接收到的内容:55AA00012060323032323A30363A31333A31313A33363A32353A303030000001510000003CD119D5750100000000FFFFFFFF54452B32382E38353123

------------------------------------


Log Entry : 11:35:58 2022年6月13日 

处理舱内正常状态数据异常！Timeout expired.  The timeout period elapsed prior to completion of the operation or the server is not responding.

------------------------------------


Log Entry : 11:36:35 2022年6月13日 

解析数据采集器1下位机环境参数程序出现异常:Timeout expired.  The timeout period elapsed prior to completion of the operation or the server is not responding.接收到的内容:55AA00012060323032323A30363A31333A31313A33373A31313A303030000001530000003CD119D5750100000000FFFFFFFF54452B32382E38363723

------------------------------------


Log Entry : 11:36:43 2022年6月13日 

处理舱内正常状态数据异常！Timeout expired.  The timeout period elapsed prior to completion of the operation or the server is not responding.

------------------------------------


Log Entry : 11:37:08 2022年6月13日 

定时生成存储文件出现异常！Timeout expired.  The timeout period elapsed prior to completion of the operation or the server is not responding.

------------------------------------


Log Entry : 11:37:26 2022年6月13日 

解析数据采集器1下位机环境参数程序出现异常:Timeout expired.  The timeout period elapsed prior to completion of the operation or the server is not responding.接收到的内容:55AA00012060323032323A30363A31333A31313A33373A35363A303030000001550000003CD119D5750100000000FFFFFFFF54452B32382E38383223

------------------------------------


Log Entry : 11:37:29 2022年6月13日 

处理舱内正常状态数据异常！Timeout expired.  The timeout period elapsed prior to completion of the operation or the server is not responding.

------------------------------------


Log Entry : 11:38:05 2022年6月13日 

解析数据采集器1下位机环境参数程序出现异常:Timeout expired.  The timeout period elapsed prior to completion of the operation or the server is not responding.接收到的内容:55AA00012060323032323A30363A31333A31313A33383A34313A303030000001570000003CD119D5750100000000FFFFFFFF54452B32382E39303123

------------------------------------


Log Entry : 11:38:14 2022年6月13日 

处理舱内正常状态数据异常！Timeout expired.  The timeout period elapsed prior to completion of the operation or the server is not responding.

------------------------------------


Log Entry : 11:38:23 2022年6月13日 

定时生成存储文件出现异常！Timeout expired.  The timeout period elapsed prior to completion of the operation or the server is not responding.

------------------------------------


Log Entry : 11:38:51 2022年6月13日 

给下位机发送指令异常！您的主机中的软件中止了一个已建立的连接。

------------------------------------


Log Entry : 11:38:56 2022年6月13日 

解析数据采集器1下位机环境参数程序出现异常:Timeout expired.  The timeout period elapsed prior to completion of the operation or the server is not responding.接收到的内容:55AA00012060323032323A30363A31333A31313A33393A32363A303030000001590000003CD119D5750100000000FFFFFFFF54452B32382E39313323

------------------------------------


Log Entry : 11:38:59 2022年6月13日 

处理舱内正常状态数据异常！Timeout expired.  The timeout period elapsed prior to completion of the operation or the server is not responding.

------------------------------------


Log Entry : 11:39:35 2022年6月13日 

解析数据采集器1下位机环境参数程序出现异常:Timeout expired.  The timeout period elapsed prior to completion of the operation or the server is not responding.接收到的内容:55AA00012010323032323A30363A31333A31313A34303A31333A303030000006C300000043365C9A8B0100000000FFFFFFFF4E314330302E3030305631312E39363523

------------------------------------


Log Entry : 11:39:38 2022年6月13日 

定时生成存储文件出现异常！Timeout expired.  The timeout period elapsed prior to completion of the operation or the server is not responding.

------------------------------------


Log Entry : 11:39:47 2022年6月13日 

处理舱内正常状态数据异常！Timeout expired.  The timeout period elapsed prior to completion of the operation or the server is not responding.

------------------------------------


Log Entry : 11:40:27 2022年6月13日 

解析数据采集器1下位机传感器数据程序出现异常:Timeout expired.  The timeout period elapsed prior to completion of the operation or the server is not responding.接收到的内容:55AA00010001323032323A30363A31333A31313A34303A35323A3030300000010300000040365C9A8B0100000000FFFFFFFF4E31244461746130372E39373B23

------------------------------------


Log Entry : 11:40:30 2022年6月13日 

处理舱内正常状态数据异常！Timeout expired.  The timeout period elapsed prior to completion of the operation or the server is not responding.

------------------------------------


Log Entry : 11:40:53 2022年6月13日 

定时生成存储文件出现异常！Timeout expired.  The timeout period elapsed prior to completion of the operation or the server is not responding.

------------------------------------


Log Entry : 11:41:06 2022年6月13日 

解析数据采集器1下位机环境参数程序出现异常:Timeout expired.  The timeout period elapsed prior to completion of the operation or the server is not responding.接收到的内容:55AA00012060323032323A30363A31333A31313A34313A34323A3030300000015F0000003CD119D5750100000000FFFFFFFF54452B32382E39353923

------------------------------------


Log Entry : 11:41:15 2022年6月13日 

处理舱内正常状态数据异常！Timeout expired.  The timeout period elapsed prior to completion of the operation or the server is not responding.

------------------------------------


Log Entry : 11:41:57 2022年6月13日 

解析数据采集器1下位机环境参数程序出现异常:Timeout expired.  The timeout period elapsed prior to completion of the operation or the server is not responding.接收到的内容:55AA00012060323032323A30363A31333A31313A34323A32373A303030000001610000003CD119D5750100000000FFFFFFFF54452B32382E39373423

------------------------------------


Log Entry : 11:42:01 2022年6月13日 

处理舱内正常状态数据异常！Timeout expired.  The timeout period elapsed prior to completion of the operation or the server is not responding.

------------------------------------


Log Entry : 11:42:08 2022年6月13日 

定时生成存储文件出现异常！Timeout expired.  The timeout period elapsed prior to completion of the operation or the server is not responding.

------------------------------------


Log Entry : 11:42:36 2022年6月13日 

解析数据采集器1下位机环境参数程序出现异常:Timeout expired.  The timeout period elapsed prior to completion of the operation or the server is not responding.接收到的内容:55AA00012060323032323A30363A31333A31313A34333A31333A303030000001630000003CD119D5750100000000FFFFFFFF54452B32382E39393023

------------------------------------


Log Entry : 11:42:46 2022年6月13日 

处理舱内正常状态数据异常！Timeout expired.  The timeout period elapsed prior to completion of the operation or the server is not responding.

------------------------------------


Log Entry : 11:43:23 2022年6月13日 

定时生成存储文件出现异常！Timeout expired.  The timeout period elapsed prior to completion of the operation or the server is not responding.

------------------------------------


Log Entry : 11:43:28 2022年6月13日 

解析数据采集器1下位机环境参数程序出现异常:Timeout expired.  The timeout period elapsed prior to completion of the operation or the server is not responding.接收到的内容:55AA00012060323032323A30363A31333A31313A34333A35383A303030000001650000003CD119D5750100000000FFFFFFFF54452B32392E30303523

------------------------------------


Log Entry : 11:43:31 2022年6月13日 

处理舱内正常状态数据异常！Timeout expired.  The timeout period elapsed prior to completion of the operation or the server is not responding.

------------------------------------


Log Entry : 11:44:07 2022年6月13日 

解析数据采集器1下位机环境参数程序出现异常:Timeout expired.  The timeout period elapsed prior to completion of the operation or the server is not responding.接收到的内容:55AA00012060323032323A30363A31333A31313A34343A34333A303030000001670000003CD119D5750100000000FFFFFFFF54452B32392E30323123

------------------------------------


Log Entry : 11:44:17 2022年6月13日 

处理舱内正常状态数据异常！Timeout expired.  The timeout period elapsed prior to completion of the operation or the server is not responding.

------------------------------------


Log Entry : 11:44:38 2022年6月13日 

定时生成存储文件出现异常！Timeout expired.  The timeout period elapsed prior to completion of the operation or the server is not responding.

------------------------------------


Log Entry : 11:44:58 2022年6月13日 

解析数据采集器1下位机环境参数程序出现异常:Timeout expired.  The timeout period elapsed prior to completion of the operation or the server is not responding.接收到的内容:55AA00012060323032323A30363A31333A31313A34353A32383A303030000001690000003CD119D5750100000000FFFFFFFF54452B32392E30333623

------------------------------------


Log Entry : 11:45:02 2022年6月13日 

处理舱内正常状态数据异常！Timeout expired.  The timeout period elapsed prior to completion of the operation or the server is not responding.

------------------------------------


Log Entry : 11:45:49 2022年6月13日 

解析数据采集器1下位机传感器数据程序出现异常:Timeout expired.  The timeout period elapsed prior to completion of the operation or the server is not responding.接收到的内容:55AA00010001323032323A30363A31333A31313A34363A31343A3030300000010E00000040365C9A8B0100000000FFFFFFFF4E31244461746130382E30323B23

------------------------------------


Log Entry : 11:45:49 2022年6月13日 

处理舱内正常状态数据异常！Timeout expired.  The timeout period elapsed prior to completion of the operation or the server is not responding.

------------------------------------


Log Entry : 11:45:53 2022年6月13日 

定时生成存储文件出现异常！Timeout expired.  The timeout period elapsed prior to completion of the operation or the server is not responding.

------------------------------------


Log Entry : 11:46:28 2022年6月13日 

解析数据采集器1下位机传感器数据程序出现异常:Timeout expired.  The timeout period elapsed prior to completion of the operation or the server is not responding.接收到的内容:55AA00010001323032323A30363A31333A31313A34363A35343A3030300000010F00000040365C9A8B0100000000FFFFFFFF4E31244461746130382E30303B23

------------------------------------


Log Entry : 11:46:33 2022年6月13日 

处理舱内正常状态数据异常！Timeout expired.  The timeout period elapsed prior to completion of the operation or the server is not responding.

------------------------------------


Log Entry : 11:47:08 2022年6月13日 

解析数据采集器1下位机环境参数程序出现异常:Timeout expired.  The timeout period elapsed prior to completion of the operation or the server is not responding.接收到的内容:55AA00012060323032323A30363A31333A31313A34373A34343A3030300000016F0000003CD119D5750100000000FFFFFFFF54452B32392E30373823

------------------------------------


Log Entry : 11:47:08 2022年6月13日 

定时生成存储文件出现异常！Timeout expired.  The timeout period elapsed prior to completion of the operation or the server is not responding.

------------------------------------


Log Entry : 11:47:18 2022年6月13日 

处理舱内正常状态数据异常！Timeout expired.  The timeout period elapsed prior to completion of the operation or the server is not responding.

------------------------------------


Log Entry : 11:47:59 2022年6月13日 

解析数据采集器1下位机环境参数程序出现异常:Timeout expired.  The timeout period elapsed prior to completion of the operation or the server is not responding.接收到的内容:55AA00012060323032323A30363A31333A31313A34383A32393A303030000001710000003CD119D5750100000000FFFFFFFF54452B32392E30393223

------------------------------------


Log Entry : 11:48:03 2022年6月13日 

处理舱内正常状态数据异常！Timeout expired.  The timeout period elapsed prior to completion of the operation or the server is not responding.

------------------------------------


Log Entry : 11:48:23 2022年6月13日 

定时生成存储文件出现异常！Timeout expired.  The timeout period elapsed prior to completion of the operation or the server is not responding.

------------------------------------


Log Entry : 11:48:38 2022年6月13日 

解析数据采集器1下位机环境参数程序出现异常:Timeout expired.  The timeout period elapsed prior to completion of the operation or the server is not responding.接收到的内容:55AA00012060323032323A30363A31333A31313A34393A31353A303030000001730000003CD119D5750100000000FFFFFFFF54452B32392E31303523

------------------------------------


Log Entry : 11:48:49 2022年6月13日 

处理舱内正常状态数据异常！Timeout expired.  The timeout period elapsed prior to completion of the operation or the server is not responding.

------------------------------------


Log Entry : 11:48:52 2022年6月13日 

给下位机发送指令异常！您的主机中的软件中止了一个已建立的连接。

------------------------------------


Log Entry : 11:49:29 2022年6月13日 

解析数据采集器1下位机环境参数程序出现异常:Timeout expired.  The timeout period elapsed prior to completion of the operation or the server is not responding.接收到的内容:55AA00012060323032323A30363A31333A31313A35303A30303A303030000001750000003CD119D5750100000000FFFFFFFF54452B32392E31323123

------------------------------------


Log Entry : 11:49:34 2022年6月13日 

处理舱内正常状态数据异常！Timeout expired.  The timeout period elapsed prior to completion of the operation or the server is not responding.

------------------------------------


Log Entry : 11:49:38 2022年6月13日 

定时生成存储文件出现异常！Timeout expired.  The timeout period elapsed prior to completion of the operation or the server is not responding.

------------------------------------


Log Entry : 11:50:08 2022年6月13日 

解析数据采集器1下位机环境参数程序出现异常:Timeout expired.  The timeout period elapsed prior to completion of the operation or the server is not responding.接收到的内容:55AA00012060323032323A30363A31333A31313A35303A34353A303030000001770000003CD119D5750100000000FFFFFFFF54452B32392E31333623

------------------------------------


Log Entry : 11:50:19 2022年6月13日 

处理舱内正常状态数据异常！Timeout expired.  The timeout period elapsed prior to completion of the operation or the server is not responding.

------------------------------------


Log Entry : 11:50:54 2022年6月13日 

定时生成存储文件出现异常！Timeout expired.  The timeout period elapsed prior to completion of the operation or the server is not responding.

------------------------------------


Log Entry : 11:50:59 2022年6月13日 

解析数据采集器1下位机环境参数程序出现异常:Timeout expired.  The timeout period elapsed prior to completion of the operation or the server is not responding.接收到的内容:55AA00012060323032323A30363A31333A31313A35313A33303A303030000001790000003CD119D5750100000000FFFFFFFF54452B32392E31353023

------------------------------------


Log Entry : 11:51:05 2022年6月13日 

处理舱内正常状态数据异常！Timeout expired.  The timeout period elapsed prior to completion of the operation or the server is not responding.

------------------------------------


Log Entry : 11:51:38 2022年6月13日 

解析数据采集器1下位机传感器数据程序出现异常:Timeout expired.  The timeout period elapsed prior to completion of the operation or the server is not responding.接收到的内容:55AA00010001323032323A30363A31333A31313A35323A31363A3030300000011A00000040365C9A8B0100000000FFFFFFFF4E31244461746130382E30303B23

------------------------------------


Log Entry : 11:51:50 2022年6月13日 

处理舱内正常状态数据异常！Timeout expired.  The timeout period elapsed prior to completion of the operation or the server is not responding.

------------------------------------


Log Entry : 11:52:09 2022年6月13日 

定时生成存储文件出现异常！Timeout expired.  The timeout period elapsed prior to completion of the operation or the server is not responding.

------------------------------------


Log Entry : 11:52:30 2022年6月13日 

解析数据采集器1下位机传感器数据程序出现异常:Timeout expired.  The timeout period elapsed prior to completion of the operation or the server is not responding.接收到的内容:55AA00010001323032323A30363A31333A31313A35323A35363A3030300000011B00000040365C9A8B0100000000FFFFFFFF4E31244461746130382E30383B23

------------------------------------


Log Entry : 11:52:36 2022年6月13日 

处理舱内正常状态数据异常！Timeout expired.  The timeout period elapsed prior to completion of the operation or the server is not responding.

------------------------------------


Log Entry : 11:53:09 2022年6月13日 

解析数据采集器1下位机环境参数程序出现异常:Timeout expired.  The timeout period elapsed prior to completion of the operation or the server is not responding.接收到的内容:55AA00012060323032323A30363A31333A31313A35333A34363A3030300000017F0000003CD119D5750100000000FFFFFFFF54452B32392E31393023

------------------------------------


Log Entry : 11:53:21 2022年6月13日 

处理舱内正常状态数据异常！Timeout expired.  The timeout period elapsed prior to completion of the operation or the server is not responding.

------------------------------------


Log Entry : 11:53:24 2022年6月13日 

定时生成存储文件出现异常！Timeout expired.  The timeout period elapsed prior to completion of the operation or the server is not responding.

------------------------------------


Log Entry : 11:54:00 2022年6月13日 

解析数据采集器1下位机环境参数程序出现异常:Timeout expired.  The timeout period elapsed prior to completion of the operation or the server is not responding.接收到的内容:55AA00012060323032323A30363A31333A31313A35343A33313A303030000001810000003CD119D5750100000000FFFFFFFF54452B32392E32303523

------------------------------------


Log Entry : 11:54:06 2022年6月13日 

处理舱内正常状态数据异常！Timeout expired.  The timeout period elapsed prior to completion of the operation or the server is not responding.

------------------------------------


Log Entry : 11:54:39 2022年6月13日 

定时生成存储文件出现异常！Timeout expired.  The timeout period elapsed prior to completion of the operation or the server is not responding.

------------------------------------


Log Entry : 11:54:39 2022年6月13日 

解析数据采集器1下位机环境参数程序出现异常:Timeout expired.  The timeout period elapsed prior to completion of the operation or the server is not responding.接收到的内容:55AA00012060323032323A30363A31333A31313A35353A31363A303030000001830000003CD119D5750100000000FFFFFFFF54452B32392E32313723

------------------------------------


Log Entry : 11:54:52 2022年6月13日 

处理舱内正常状态数据异常！Timeout expired.  The timeout period elapsed prior to completion of the operation or the server is not responding.

------------------------------------


Log Entry : 11:55:31 2022年6月13日 

解析数据采集器1下位机环境参数程序出现异常:Timeout expired.  The timeout period elapsed prior to completion of the operation or the server is not responding.接收到的内容:55AA00012060323032323A30363A31333A31313A35363A30323A303030000001850000003CD119D5750100000000FFFFFFFF54452B32392E32333223

------------------------------------


Log Entry : 11:55:37 2022年6月13日 

处理舱内正常状态数据异常！Timeout expired.  The timeout period elapsed prior to completion of the operation or the server is not responding.

------------------------------------


Log Entry : 11:55:54 2022年6月13日 

定时生成存储文件出现异常！Timeout expired.  The timeout period elapsed prior to completion of the operation or the server is not responding.

------------------------------------


Log Entry : 11:56:10 2022年6月13日 

解析数据采集器1下位机环境参数程序出现异常:Timeout expired.  The timeout period elapsed prior to completion of the operation or the server is not responding.接收到的内容:55AA00012060323032323A30363A31333A31313A35363A34373A303030000001870000003CD119D5750100000000FFFFFFFF54452B32392E32343823

------------------------------------


Log Entry : 11:56:22 2022年6月13日 

处理舱内正常状态数据异常！Timeout expired.  The timeout period elapsed prior to completion of the operation or the server is not responding.

------------------------------------


Log Entry : 11:57:01 2022年6月13日 

解析数据采集器1下位机环境参数程序出现异常:Timeout expired.  The timeout period elapsed prior to completion of the operation or the server is not responding.接收到的内容:55AA00012060323032323A30363A31333A31313A35373A33323A303030000001890000003CD119D5750100000000FFFFFFFF54452B32392E32353723

------------------------------------


Log Entry : 11:57:08 2022年6月13日 

处理舱内正常状态数据异常！Timeout expired.  The timeout period elapsed prior to completion of the operation or the server is not responding.

------------------------------------


Log Entry : 11:57:09 2022年6月13日 

定时生成存储文件出现异常！Timeout expired.  The timeout period elapsed prior to completion of the operation or the server is not responding.

------------------------------------


Log Entry : 11:57:40 2022年6月13日 

解析数据采集器1下位机传感器数据程序出现异常:Timeout expired.  The timeout period elapsed prior to completion of the operation or the server is not responding.接收到的内容:55AA00010001323032323A30363A31333A31313A35383A31383A3030300000012600000040365C9A8B0100000000FFFFFFFF4E31244461746130382E30333B23

------------------------------------


Log Entry : 11:57:53 2022年6月13日 

处理舱内正常状态数据异常！Timeout expired.  The timeout period elapsed prior to completion of the operation or the server is not responding.

------------------------------------


Log Entry : 11:58:24 2022年6月13日 

定时生成存储文件出现异常！Timeout expired.  The timeout period elapsed prior to completion of the operation or the server is not responding.

------------------------------------


Log Entry : 11:58:31 2022年6月13日 

解析数据采集器1下位机传感器数据程序出现异常:Timeout expired.  The timeout period elapsed prior to completion of the operation or the server is not responding.接收到的内容:55AA00010001323032323A30363A31333A31313A35383A35383A3030300000012700000040365C9A8B0100000000FFFFFFFF4E31244461746130382E30373B23

------------------------------------


Log Entry : 11:58:38 2022年6月13日 

处理舱内正常状态数据异常！Timeout expired.  The timeout period elapsed prior to completion of the operation or the server is not responding.

------------------------------------


Log Entry : 11:58:53 2022年6月13日 

给下位机发送指令异常！您的主机中的软件中止了一个已建立的连接。

------------------------------------


Log Entry : 11:59:10 2022年6月13日 

解析数据采集器1下位机环境参数程序出现异常:Timeout expired.  The timeout period elapsed prior to completion of the operation or the server is not responding.接收到的内容:55AA00012060323032323A30363A31333A31313A35393A34383A3030300000018F0000003CD119D5750100000000FFFFFFFF54452B32392E32393523

------------------------------------


Log Entry : 11:59:24 2022年6月13日 

处理舱内正常状态数据异常！Timeout expired.  The timeout period elapsed prior to completion of the operation or the server is not responding.

------------------------------------


Log Entry : 11:59:39 2022年6月13日 

定时生成存储文件出现异常！Timeout expired.  The timeout period elapsed prior to completion of the operation or the server is not responding.

------------------------------------


Log Entry : 12:00:02 2022年6月13日 

解析数据采集器1下位机环境参数程序出现异常:Timeout expired.  The timeout period elapsed prior to completion of the operation or the server is not responding.接收到的内容:55AA00012060323032323A30363A31333A31323A30303A33333A303030000001910000003CD119D5750100000000FFFFFFFF54452B32392E33303923

------------------------------------


Log Entry : 12:00:09 2022年6月13日 

处理舱内正常状态数据异常！Timeout expired.  The timeout period elapsed prior to completion of the operation or the server is not responding.

------------------------------------


Log Entry : 12:00:41 2022年6月13日 

解析数据采集器1下位机环境参数程序出现异常:Timeout expired.  The timeout period elapsed prior to completion of the operation or the server is not responding.接收到的内容:55AA00012060323032323A30363A31333A31323A30313A31383A303030000001930000003CD119D5750100000000FFFFFFFF54452B32392E33323523

------------------------------------


Log Entry : 12:00:54 2022年6月13日 

定时生成存储文件出现异常！Timeout expired.  The timeout period elapsed prior to completion of the operation or the server is not responding.

------------------------------------


Log Entry : 12:00:54 2022年6月13日 

处理舱内正常状态数据异常！Timeout expired.  The timeout period elapsed prior to completion of the operation or the server is not responding.

------------------------------------


Log Entry : 12:01:32 2022年6月13日 

解析数据采集器1下位机环境参数程序出现异常:Timeout expired.  The timeout period elapsed prior to completion of the operation or the server is not responding.接收到的内容:55AA00012060323032323A30363A31333A31323A30323A30333A303030000001950000003CD119D5750100000000FFFFFFFF54452B32392E33333623

------------------------------------


Log Entry : 12:01:40 2022年6月13日 

处理舱内正常状态数据异常！Timeout expired.  The timeout period elapsed prior to completion of the operation or the server is not responding.

------------------------------------


Log Entry : 12:02:09 2022年6月13日 

定时生成存储文件出现异常！Timeout expired.  The timeout period elapsed prior to completion of the operation or the server is not responding.

------------------------------------


Log Entry : 12:02:11 2022年6月13日 

解析数据采集器1下位机环境参数程序出现异常:Timeout expired.  The timeout period elapsed prior to completion of the operation or the server is not responding.接收到的内容:55AA00012060323032323A30363A31333A31323A30323A34393A303030000001970000003CD119D5750100000000FFFFFFFF54452B32392E33343823

------------------------------------


Log Entry : 12:02:25 2022年6月13日 

处理舱内正常状态数据异常！Timeout expired.  The timeout period elapsed prior to completion of the operation or the server is not responding.

------------------------------------


Log Entry : 12:03:02 2022年6月13日 

解析数据采集器1下位机环境参数程序出现异常:Timeout expired.  The timeout period elapsed prior to completion of the operation or the server is not responding.接收到的内容:55AA00012060323032323A30363A31333A31323A30333A33343A303030000001990000003CD119D5750100000000FFFFFFFF54452B32392E33353923

------------------------------------


Log Entry : 12:03:10 2022年6月13日 

处理舱内正常状态数据异常！Timeout expired.  The timeout period elapsed prior to completion of the operation or the server is not responding.

------------------------------------


Log Entry : 12:03:24 2022年6月13日 

定时生成存储文件出现异常！Timeout expired.  The timeout period elapsed prior to completion of the operation or the server is not responding.

------------------------------------


Log Entry : 12:03:41 2022年6月13日 

解析数据采集器1下位机传感器数据程序出现异常:Timeout expired.  The timeout period elapsed prior to completion of the operation or the server is not responding.接收到的内容:55AA00010001323032323A30363A31333A31323A30343A32303A3030300000013200000040365C9A8B0100000000FFFFFFFF4E31244461746130372E39313B23

------------------------------------


Log Entry : 12:03:56 2022年6月13日 

处理舱内正常状态数据异常！Timeout expired.  The timeout period elapsed prior to completion of the operation or the server is not responding.

------------------------------------


Log Entry : 12:04:32 2022年6月13日 

解析数据采集器1下位机传感器数据程序出现异常:Timeout expired.  The timeout period elapsed prior to completion of the operation or the server is not responding.接收到的内容:55AA00010001323032323A30363A31333A31323A30353A30303A3030300000013300000040365C9A8B0100000000FFFFFFFF4E31244461746130372E39313B23

------------------------------------


Log Entry : 12:04:39 2022年6月13日 

定时生成存储文件出现异常！Timeout expired.  The timeout period elapsed prior to completion of the operation or the server is not responding.

------------------------------------


Log Entry : 12:04:41 2022年6月13日 

处理舱内正常状态数据异常！Timeout expired.  The timeout period elapsed prior to completion of the operation or the server is not responding.

------------------------------------


Log Entry : 12:05:11 2022年6月13日 

解析数据采集器1下位机环境参数程序出现异常:Timeout expired.  The timeout period elapsed prior to completion of the operation or the server is not responding.接收到的内容:55AA00012060323032323A30363A31333A31323A30353A35303A3030300000019F0000003CD119D5750100000000FFFFFFFF54452B32392E33393423

------------------------------------


Log Entry : 12:05:26 2022年6月13日 

处理舱内正常状态数据异常！Timeout expired.  The timeout period elapsed prior to completion of the operation or the server is not responding.

------------------------------------


Log Entry : 12:05:54 2022年6月13日 

定时生成存储文件出现异常！Timeout expired.  The timeout period elapsed prior to completion of the operation or the server is not responding.

------------------------------------


Log Entry : 12:06:03 2022年6月13日 

解析数据采集器1下位机环境参数程序出现异常:Timeout expired.  The timeout period elapsed prior to completion of the operation or the server is not responding.接收到的内容:55AA00012060323032323A30363A31333A31323A30363A33353A303030000001A10000003CD119D5750100000000FFFFFFFF54452B32392E34303923

------------------------------------


Log Entry : 12:06:12 2022年6月13日 

处理舱内正常状态数据异常！Timeout expired.  The timeout period elapsed prior to completion of the operation or the server is not responding.

------------------------------------


Log Entry : 12:06:42 2022年6月13日 

解析数据采集器1下位机环境参数程序出现异常:Timeout expired.  The timeout period elapsed prior to completion of the operation or the server is not responding.接收到的内容:55AA00012060323032323A30363A31333A31323A30373A32303A303030000001A30000003CD119D5750100000000FFFFFFFF54452B32392E34323123

------------------------------------


Log Entry : 12:07:09 2022年6月13日 

定时生成存储文件出现异常！Timeout expired.  The timeout period elapsed prior to completion of the operation or the server is not responding.

------------------------------------


Log Entry : 12:07:21 2022年6月13日 

解析数据采集器1下位机环境参数程序出现异常:Timeout expired.  The timeout period elapsed prior to completion of the operation or the server is not responding.接收到的内容:55AA00012060323032323A30363A31333A31323A30383A30353A303030000001A50000003CD119D5750100000000FFFFFFFF54452B32392E34333223

------------------------------------


Log Entry : 12:07:21 2022年6月13日 

处理舱内正常状态数据异常！Timeout expired.  The timeout period elapsed prior to completion of the operation or the server is not responding.

------------------------------------


Log Entry : 12:07:48 2022年6月13日 

处理舱内正常状态数据异常！Timeout expired.  The timeout period elapsed prior to completion of the operation or the server is not responding.

------------------------------------


Log Entry : 12:08:15 2022年6月13日 

解析数据采集器1下位机环境参数程序出现异常:Timeout expired.  The timeout period elapsed prior to completion of the operation or the server is not responding.接收到的内容:55AA00012060323032323A30363A31333A31323A30383A35303A303030000001A70000003CD119D5750100000000FFFFFFFF54452B32392E34343423

------------------------------------


Log Entry : 12:08:24 2022年6月13日 

定时生成存储文件出现异常！Timeout expired.  The timeout period elapsed prior to completion of the operation or the server is not responding.

------------------------------------


Log Entry : 12:08:47 2022年6月13日 

处理舱内正常状态数据异常！Timeout expired.  The timeout period elapsed prior to completion of the operation or the server is not responding.

------------------------------------


Log Entry : 12:08:55 2022年6月13日 

给下位机发送指令异常！您的主机中的软件中止了一个已建立的连接。

------------------------------------


Log Entry : 12:09:02 2022年6月13日 

解析数据采集器1下位机环境参数程序出现异常:Timeout expired.  The timeout period elapsed prior to completion of the operation or the server is not responding.接收到的内容:55AA00012060323032323A30363A31333A31323A30393A33363A303030000001A90000003CD119D5750100000000FFFFFFFF54452B32392E34353523

------------------------------------


Log Entry : 12:09:13 2022年6月13日 

处理舱内正常状态数据异常！Timeout expired.  The timeout period elapsed prior to completion of the operation or the server is not responding.

------------------------------------


Log Entry : 12:09:40 2022年6月13日 

定时生成存储文件出现异常！Timeout expired.  The timeout period elapsed prior to completion of the operation or the server is not responding.

------------------------------------


Log Entry : 12:09:41 2022年6月13日 

解析数据采集器1下位机传感器数据程序出现异常:Timeout expired.  The timeout period elapsed prior to completion of the operation or the server is not responding.接收到的内容:55AA00010001323032323A30363A31333A31323A31303A32313A3030300000013E00000040365C9A8B0100000000FFFFFFFF4E31244461746130382E31303B23

------------------------------------


Log Entry : 12:10:12 2022年6月13日 

处理舱内正常状态数据异常！Timeout expired.  The timeout period elapsed prior to completion of the operation or the server is not responding.

------------------------------------


Log Entry : 12:10:16 2022年6月13日 

解析数据采集器1下位机传感器数据程序出现异常:Timeout expired.  The timeout period elapsed prior to completion of the operation or the server is not responding.接收到的内容:55AA00010001323032323A30363A31333A31323A31313A30323A3030300000013F00000040365C9A8B0100000000FFFFFFFF4E31244461746130382E30343B23

------------------------------------


Log Entry : 12:10:51 2022年6月13日 

处理舱内正常状态数据异常！Timeout expired.  The timeout period elapsed prior to completion of the operation or the server is not responding.

------------------------------------


Log Entry : 12:10:55 2022年6月13日 

定时生成存储文件出现异常！Timeout expired.  The timeout period elapsed prior to completion of the operation or the server is not responding.

------------------------------------


Log Entry : 12:10:57 2022年6月13日 

解析数据采集器1下位机传感器数据程序出现异常:Timeout expired.  The timeout period elapsed prior to completion of the operation or the server is not responding.接收到的内容:55AA00010001323032323A30363A31333A31323A31313A34323A3030300000014100000040365C9A8B0100000000FFFFFFFF4E31244461746130382E30323B23

------------------------------------


Log Entry : 12:11:42 2022年6月13日 

解析数据采集器1下位机传感器数据程序出现异常:Timeout expired.  The timeout period elapsed prior to completion of the operation or the server is not responding.接收到的内容:55AA00010001323032323A30363A31333A31323A31323A32323A3030300000014200000040365C9A8B0100000000FFFFFFFF4E31244461746130382E30393B23

------------------------------------


Log Entry : 12:11:42 2022年6月13日 

处理舱内正常状态数据异常！Timeout expired.  The timeout period elapsed prior to completion of the operation or the server is not responding.

------------------------------------


Log Entry : 12:12:10 2022年6月13日 

定时生成存储文件出现异常！Timeout expired.  The timeout period elapsed prior to completion of the operation or the server is not responding.

------------------------------------


Log Entry : 12:12:21 2022年6月13日 

解析数据采集器1下位机环境参数程序出现异常:Timeout expired.  The timeout period elapsed prior to completion of the operation or the server is not responding.接收到的内容:55AA00012060323032323A30363A31333A31323A31323A35393A303030000001B20000003CD119D5750100000000FFFFFFFF54452B32392E35303623

------------------------------------


Log Entry : 12:13:00 2022年6月13日 

处理舱内正常状态数据异常！Timeout expired.  The timeout period elapsed prior to completion of the operation or the server is not responding.

------------------------------------


Log Entry : 12:13:00 2022年6月13日 

解析数据采集器1下位机传感器数据程序出现异常:Timeout expired.  The timeout period elapsed prior to completion of the operation or the server is not responding.接收到的内容:55AA00010001323032323A30363A31333A31323A31333A34323A3030300000014500000040365C9A8B0100000000FFFFFFFF4E31244461746130382E30373B23

------------------------------------


Log Entry : 12:13:25 2022年6月13日 

定时生成存储文件出现异常！Timeout expired.  The timeout period elapsed prior to completion of the operation or the server is not responding.

------------------------------------


Log Entry : 12:13:28 2022年6月13日 

处理舱内正常状态数据异常！Timeout expired.  The timeout period elapsed prior to completion of the operation or the server is not responding.

------------------------------------


Log Entry : 12:13:38 2022年6月13日 

解析数据采集器1下位机传感器数据程序出现异常:Timeout expired.  The timeout period elapsed prior to completion of the operation or the server is not responding.接收到的内容:55AA00010001323032323A30363A31333A31323A31343A32333A3030300000014600000040365C9A8B0100000000FFFFFFFF4E31244461746130382E30383B23

------------------------------------


Log Entry : 12:14:19 2022年6月13日 

解析数据采集器1下位机传感器数据程序出现异常:Timeout expired.  The timeout period elapsed prior to completion of the operation or the server is not responding.接收到的内容:55AA00010001323032323A30363A31333A31323A31353A30333A3030300000014700000040365C9A8B0100000000FFFFFFFF4E31244461746130382E30343B23

------------------------------------


Log Entry : 12:14:19 2022年6月13日 

处理舱内正常状态数据异常！Timeout expired.  The timeout period elapsed prior to completion of the operation or the server is not responding.

------------------------------------


Log Entry : 12:14:40 2022年6月13日 

定时生成存储文件出现异常！Timeout expired.  The timeout period elapsed prior to completion of the operation or the server is not responding.

------------------------------------


Log Entry : 12:14:58 2022年6月13日 

解析数据采集器1下位机环境参数程序出现异常:Timeout expired.  The timeout period elapsed prior to completion of the operation or the server is not responding.接收到的内容:55AA00012060323032323A30363A31333A31323A31353A33373A303030000001B90000003CD119D5750100000000FFFFFFFF54452B32392E35343423

------------------------------------


Log Entry : 12:15:37 2022年6月13日 

处理舱内正常状态数据异常！Timeout expired.  The timeout period elapsed prior to completion of the operation or the server is not responding.

------------------------------------


Log Entry : 12:15:37 2022年6月13日 

解析数据采集器1下位机传感器数据程序出现异常:Timeout expired.  The timeout period elapsed prior to completion of the operation or the server is not responding.接收到的内容:55AA00010001323032323A30363A31333A31323A31363A32333A3030300000014A00000040365C9A8B0100000000FFFFFFFF4E31244461746130382E30393B23

------------------------------------


Log Entry : 12:15:55 2022年6月13日 

定时生成存储文件出现异常！Timeout expired.  The timeout period elapsed prior to completion of the operation or the server is not responding.

------------------------------------


Log Entry : 12:16:04 2022年6月13日 

处理舱内正常状态数据异常！Timeout expired.  The timeout period elapsed prior to completion of the operation or the server is not responding.

------------------------------------


Log Entry : 12:16:18 2022年6月13日 

解析数据采集器1下位机传感器数据程序出现异常:Timeout expired.  The timeout period elapsed prior to completion of the operation or the server is not responding.接收到的内容:55AA00010001323032323A30363A31333A31323A31373A30343A3030300000014B00000040365C9A8B0100000000FFFFFFFF4E31244461746130382E30393B23

------------------------------------


Log Entry : 12:16:58 2022年6月13日 

处理舱内正常状态数据异常！Timeout expired.  The timeout period elapsed prior to completion of the operation or the server is not responding.

------------------------------------


Log Entry : 12:16:59 2022年6月13日 

解析数据采集器1下位机传感器数据程序出现异常:Timeout expired.  The timeout period elapsed prior to completion of the operation or the server is not responding.接收到的内容:55AA00010001323032323A30363A31333A31323A31373A34343A3030300000014D00000040365C9A8B0100000000FFFFFFFF4E31244461746130382E30343B23

------------------------------------


Log Entry : 12:17:10 2022年6月13日 

定时生成存储文件出现异常！Timeout expired.  The timeout period elapsed prior to completion of the operation or the server is not responding.

------------------------------------


Log Entry : 12:17:37 2022年6月13日 

处理舱内正常状态数据异常！Timeout expired.  The timeout period elapsed prior to completion of the operation or the server is not responding.

------------------------------------


Log Entry : 12:17:39 2022年6月13日 

解析数据采集器1下位机传感器数据程序出现异常:Timeout expired.  The timeout period elapsed prior to completion of the operation or the server is not responding.接收到的内容:55AA00010001323032323A30363A31333A31323A31383A32343A3030300000014E00000040365C9A8B0100000000FFFFFFFF4E31244461746130372E38393B23

------------------------------------


Log Entry : 12:18:25 2022年6月13日 

定时生成存储文件出现异常！Timeout expired.  The timeout period elapsed prior to completion of the operation or the server is not responding.

------------------------------------


Log Entry : 12:18:28 2022年6月13日 

解析数据采集器1下位机传感器数据程序出现异常:Timeout expired.  The timeout period elapsed prior to completion of the operation or the server is not responding.接收到的内容:55AA00010001323032323A30363A31333A31323A31393A30343A3030300000014F00000040365C9A8B0100000000FFFFFFFF4E31244461746130372E39373B23

------------------------------------


Log Entry : 12:18:28 2022年6月13日 

处理舱内正常状态数据异常！Timeout expired.  The timeout period elapsed prior to completion of the operation or the server is not responding.

------------------------------------


Log Entry : 12:18:56 2022年6月13日 

给下位机发送指令异常！您的主机中的软件中止了一个已建立的连接。

------------------------------------


Log Entry : 12:19:07 2022年6月13日 

解析数据采集器1下位机传感器数据程序出现异常:Timeout expired.  The timeout period elapsed prior to completion of the operation or the server is not responding.接收到的内容:55AA00010001323032323A30363A31333A31323A31393A34343A3030300000015100000040365C9A8B0100000000FFFFFFFF4E31244461746130382E30343B23

------------------------------------


Log Entry : 12:19:40 2022年6月13日 

定时生成存储文件出现异常！Timeout expired.  The timeout period elapsed prior to completion of the operation or the server is not responding.

------------------------------------


Log Entry : 12:19:46 2022年6月13日 

处理舱内正常状态数据异常！Timeout expired.  The timeout period elapsed prior to completion of the operation or the server is not responding.

------------------------------------


Log Entry : 12:19:46 2022年6月13日 

解析数据采集器1下位机传感器数据程序出现异常:Timeout expired.  The timeout period elapsed prior to completion of the operation or the server is not responding.接收到的内容:55AA00010001323032323A30363A31333A31323A32303A32353A3030300000015200000040365C9A8B0100000000FFFFFFFF4E31244461746130382E30303B23

------------------------------------


Log Entry : 12:20:13 2022年6月13日 

处理舱内正常状态数据异常！Timeout expired.  The timeout period elapsed prior to completion of the operation or the server is not responding.

------------------------------------


Log Entry : 12:20:20 2022年6月13日 

解析数据采集器1下位机传感器数据程序出现异常:Timeout expired.  The timeout period elapsed prior to completion of the operation or the server is not responding.接收到的内容:55AA00010001323032323A30363A31333A31323A32313A30353A3030300000015300000040365C9A8B0100000000FFFFFFFF4E31244461746130382E30343B23

------------------------------------


Log Entry : 12:20:55 2022年6月13日 

定时生成存储文件出现异常！Timeout expired.  The timeout period elapsed prior to completion of the operation or the server is not responding.

------------------------------------


Log Entry : 12:21:04 2022年6月13日 

解析数据采集器1下位机环境参数程序出现异常:Timeout expired.  The timeout period elapsed prior to completion of the operation or the server is not responding.接收到的内容:55AA00012060323032323A30363A31333A31323A32313A33393A303030000001C90000003CD119D5750100000000FFFFFFFF54452B32392E36323923

------------------------------------


Log Entry : 12:21:04 2022年6月13日 

处理舱内正常状态数据异常！Timeout expired.  The timeout period elapsed prior to completion of the operation or the server is not responding.

------------------------------------


Log Entry : 12:21:44 2022年6月13日 

解析数据采集器1下位机传感器数据程序出现异常:Timeout expired.  The timeout period elapsed prior to completion of the operation or the server is not responding.接收到的内容:55AA00010001323032323A30363A31333A31323A32323A32353A3030300000015600000040365C9A8B0100000000FFFFFFFF4E31244461746130382E30353B23

------------------------------------


Log Entry : 12:22:10 2022年6月13日 

定时生成存储文件出现异常！Timeout expired.  The timeout period elapsed prior to completion of the operation or the server is not responding.

------------------------------------


Log Entry : 12:22:23 2022年6月13日 

解析数据采集器1下位机传感器数据程序出现异常:Timeout expired.  The timeout period elapsed prior to completion of the operation or the server is not responding.接收到的内容:55AA00010001323032323A30363A31333A31323A32333A30363A3030300000015700000040365C9A8B0100000000FFFFFFFF4E31244461746130382E30333B23

------------------------------------


Log Entry : 12:22:23 2022年6月13日 

处理舱内正常状态数据异常！Timeout expired.  The timeout period elapsed prior to completion of the operation or the server is not responding.

------------------------------------


Log Entry : 12:22:50 2022年6月13日 

处理舱内正常状态数据异常！Timeout expired.  The timeout period elapsed prior to completion of the operation or the server is not responding.

------------------------------------


Log Entry : 12:23:01 2022年6月13日 

解析数据采集器1下位机传感器数据程序出现异常:Timeout expired.  The timeout period elapsed prior to completion of the operation or the server is not responding.接收到的内容:55AA00010001323032323A30363A31333A31323A32333A34363A3030300000015900000040365C9A8B0100000000FFFFFFFF4E31244461746130382E30353B23

------------------------------------


Log Entry : 12:23:25 2022年6月13日 

定时生成存储文件出现异常！Timeout expired.  The timeout period elapsed prior to completion of the operation or the server is not responding.

------------------------------------


Log Entry : 12:23:41 2022年6月13日 

解析数据采集器1下位机环境参数程序出现异常:Timeout expired.  The timeout period elapsed prior to completion of the operation or the server is not responding.接收到的内容:55AA00012060323032323A30363A31333A31323A32343A31383A303030000001D00000003CD119D5750100000000FFFFFFFF54452B32392E36363723

------------------------------------


Log Entry : 12:23:41 2022年6月13日 

处理舱内正常状态数据异常！Timeout expired.  The timeout period elapsed prior to completion of the operation or the server is not responding.

------------------------------------


Log Entry : 12:24:20 2022年6月13日 

处理舱内正常状态数据异常！Timeout expired.  The timeout period elapsed prior to completion of the operation or the server is not responding.

------------------------------------


Log Entry : 12:24:21 2022年6月13日 

解析数据采集器1下位机传感器数据程序出现异常:Timeout expired.  The timeout period elapsed prior to completion of the operation or the server is not responding.接收到的内容:55AA00010001323032323A30363A31333A31323A32353A30363A3030300000015C00000040365C9A8B0100000000FFFFFFFF4E31244461746130372E39363B23

------------------------------------


Log Entry : 12:24:40 2022年6月13日 

定时生成存储文件出现异常！Timeout expired.  The timeout period elapsed prior to completion of the operation or the server is not responding.

------------------------------------


Log Entry : 12:25:11 2022年6月13日 

处理舱内正常状态数据异常！Timeout expired.  The timeout period elapsed prior to completion of the operation or the server is not responding.

------------------------------------


Log Entry : 12:25:11 2022年6月13日 

解析数据采集器1下位机传感器数据程序出现异常:Timeout expired.  The timeout period elapsed prior to completion of the operation or the server is not responding.接收到的内容:55AA00010001323032323A30363A31333A31323A32353A34363A3030300000015D00000040365C9A8B0100000000FFFFFFFF4E31244461746130382E30353B23

------------------------------------


Log Entry : 12:25:51 2022年6月13日 

解析数据采集器1下位机传感器数据程序出现异常:Timeout expired.  The timeout period elapsed prior to completion of the operation or the server is not responding.接收到的内容:55AA00010001323032323A30363A31333A31323A32363A32373A3030300000015E00000040365C9A8B0100000000FFFFFFFF4E31244461746130382E30303B23

------------------------------------


Log Entry : 12:25:52 2022年6月13日 

处理舱内正常状态数据异常！Timeout expired.  The timeout period elapsed prior to completion of the operation or the server is not responding.

------------------------------------


Log Entry : 12:25:55 2022年6月13日 

定时生成存储文件出现异常！Timeout expired.  The timeout period elapsed prior to completion of the operation or the server is not responding.

------------------------------------


Log Entry : 12:26:42 2022年6月13日 

解析数据采集器1下位机传感器数据程序出现异常:Timeout expired.  The timeout period elapsed prior to completion of the operation or the server is not responding.接收到的内容:55AA00010001323032323A30363A31333A31323A32373A30373A3030300000016000000040365C9A8B0100000000FFFFFFFF4E31244461746130382E30303B23

------------------------------------


Log Entry : 12:26:42 2022年6月13日 

处理舱内正常状态数据异常！Timeout expired.  The timeout period elapsed prior to completion of the operation or the server is not responding.

------------------------------------


Log Entry : 12:27:10 2022年6月13日 

定时生成存储文件出现异常！Timeout expired.  The timeout period elapsed prior to completion of the operation or the server is not responding.

------------------------------------


Log Entry : 12:27:22 2022年6月13日 

处理舱内正常状态数据异常！Timeout expired.  The timeout period elapsed prior to completion of the operation or the server is not responding.

------------------------------------


Log Entry : 12:28:01 2022年6月13日 

解析数据采集器1下位机传感器数据程序出现异常:Timeout expired.  The timeout period elapsed prior to completion of the operation or the server is not responding.接收到的内容:55AA00010001323032323A30363A31333A31323A32383A32373A3030300000016200000040365C9A8B0100000000FFFFFFFF4E31244461746130372E39383B23

------------------------------------


Log Entry : 12:28:07 2022年6月13日 

处理舱内正常状态数据异常！Timeout expired.  The timeout period elapsed prior to completion of the operation or the server is not responding.

------------------------------------


Log Entry : 12:28:26 2022年6月13日 

定时生成存储文件出现异常！Timeout expired.  The timeout period elapsed prior to completion of the operation or the server is not responding.

------------------------------------


Log Entry : 12:28:49 2022年6月13日 

解析数据采集器1下位机环境参数程序出现异常:Timeout expired.  The timeout period elapsed prior to completion of the operation or the server is not responding.接收到的内容:55AA00012060323032323A30363A31333A31323A32393A33343A303030000001DE0000003CD119D5750100000000FFFFFFFF54452B32392E37343023

------------------------------------


Log Entry : 12:28:52 2022年6月13日 

处理舱内正常状态数据异常！Timeout expired.  The timeout period elapsed prior to completion of the operation or the server is not responding.

------------------------------------


Log Entry : 12:28:57 2022年6月13日 

给下位机发送指令异常！您的主机中的软件中止了一个已建立的连接。

------------------------------------


Log Entry : 12:29:38 2022年6月13日 

解析数据采集器1下位机环境参数程序出现异常:Timeout expired.  The timeout period elapsed prior to completion of the operation or the server is not responding.接收到的内容:55AA00012060323032323A30363A31333A31323A33303A32303A303030000001E00000003CD119D5750100000000FFFFFFFF54452B32392E37353223

------------------------------------


Log Entry : 12:29:41 2022年6月13日 

定时生成存储文件出现异常！Timeout expired.  The timeout period elapsed prior to completion of the operation or the server is not responding.

------------------------------------


Log Entry : 12:30:05 2022年6月13日 

处理舱内正常状态数据异常！Timeout expired.  The timeout period elapsed prior to completion of the operation or the server is not responding.

------------------------------------


Log Entry : 12:30:20 2022年6月13日 

解析数据采集器1下位机环境参数程序出现异常:Timeout expired.  The timeout period elapsed prior to completion of the operation or the server is not responding.接收到的内容:55AA00012060323032323A30363A31333A31323A33313A30353A303030000001E20000003CD119D5750100000000FFFFFFFF54452B32392E37363023

------------------------------------


Log Entry : 12:30:56 2022年6月13日 

定时生成存储文件出现异常！Timeout expired.  The timeout period elapsed prior to completion of the operation or the server is not responding.

------------------------------------


Log Entry : 12:30:59 2022年6月13日 

处理舱内正常状态数据异常！Timeout expired.  The timeout period elapsed prior to completion of the operation or the server is not responding.

------------------------------------


Log Entry : 12:31:03 2022年6月13日 

解析数据采集器1下位机传感器数据程序出现异常:Timeout expired.  The timeout period elapsed prior to completion of the operation or the server is not responding.接收到的内容:55AA00010001323032323A30363A31333A31323A33313A34383A3030300000016900000040365C9A8B0100000000FFFFFFFF4E31244461746130372E39383B23

------------------------------------


Log Entry : 12:31:38 2022年6月13日 

处理舱内正常状态数据异常！Timeout expired.  The timeout period elapsed prior to completion of the operation or the server is not responding.

------------------------------------


Log Entry : 12:31:43 2022年6月13日 

解析数据采集器1下位机传感器数据程序出现异常:Timeout expired.  The timeout period elapsed prior to completion of the operation or the server is not responding.接收到的内容:55AA00010001323032323A30363A31333A31323A33323A32393A3030300000016A00000040365C9A8B0100000000FFFFFFFF4E31244461746130382E30303B23

------------------------------------


Log Entry : 12:32:11 2022年6月13日 

定时生成存储文件出现异常！Timeout expired.  The timeout period elapsed prior to completion of the operation or the server is not responding.

------------------------------------


Log Entry : 12:32:29 2022年6月13日 

解析数据采集器1下位机传感器数据程序出现异常:Timeout expired.  The timeout period elapsed prior to completion of the operation or the server is not responding.接收到的内容:55AA00010001323032323A30363A31333A31323A33333A30393A3030300000016C00000040365C9A8B0100000000FFFFFFFF4E31244461746130382E30363B23

------------------------------------


Log Entry : 12:32:29 2022年6月13日 

处理舱内正常状态数据异常！Timeout expired.  The timeout period elapsed prior to completion of the operation or the server is not responding.

------------------------------------


Log Entry : 12:33:08 2022年6月13日 

解析数据采集器1下位机环境参数程序出现异常:Timeout expired.  The timeout period elapsed prior to completion of the operation or the server is not responding.接收到的内容:55AA00012060323032323A30363A31333A31323A33333A34333A303030000001E90000003CD119D5750100000000FFFFFFFF54452B32392E37393023

------------------------------------


Log Entry : 12:33:26 2022年6月13日 

定时生成存储文件出现异常！Timeout expired.  The timeout period elapsed prior to completion of the operation or the server is not responding.

------------------------------------


Log Entry : 12:33:47 2022年6月13日 

处理舱内正常状态数据异常！Timeout expired.  The timeout period elapsed prior to completion of the operation or the server is not responding.

------------------------------------


Log Entry : 12:33:47 2022年6月13日 

解析数据采集器1下位机传感器数据程序出现异常:Timeout expired.  The timeout period elapsed prior to completion of the operation or the server is not responding.接收到的内容:55AA00010001323032323A30363A31333A31323A33343A32393A3030300000016E00000040365C9A8B0100000000FFFFFFFF4E31244461746130382E30303B23

------------------------------------


Log Entry : 12:34:14 2022年6月13日 

处理舱内正常状态数据异常！Timeout expired.  The timeout period elapsed prior to completion of the operation or the server is not responding.

------------------------------------


Log Entry : 12:34:24 2022年6月13日 

解析数据采集器1下位机传感器数据程序出现异常:Timeout expired.  The timeout period elapsed prior to completion of the operation or the server is not responding.接收到的内容:55AA00010001323032323A30363A31333A31323A33353A30393A3030300000017000000040365C9A8B0100000000FFFFFFFF4E31244461746130372E39333B23

------------------------------------


Log Entry : 12:34:41 2022年6月13日 

定时生成存储文件出现异常！Timeout expired.  The timeout period elapsed prior to completion of the operation or the server is not responding.

------------------------------------


Log Entry : 12:35:06 2022年6月13日 

解析数据采集器1下位机传感器数据程序出现异常:Timeout expired.  The timeout period elapsed prior to completion of the operation or the server is not responding.接收到的内容:55AA00010001323032323A30363A31333A31323A33353A35303A3030300000017100000040365C9A8B0100000000FFFFFFFF4E31244461746130382E30313B23

------------------------------------


Log Entry : 12:35:06 2022年6月13日 

处理舱内正常状态数据异常！Timeout expired.  The timeout period elapsed prior to completion of the operation or the server is not responding.

------------------------------------


Log Entry : 12:35:45 2022年6月13日 

解析数据采集器1下位机环境参数程序出现异常:Timeout expired.  The timeout period elapsed prior to completion of the operation or the server is not responding.接收到的内容:55AA00012060323032323A30363A31333A31323A33363A32323A303030000001F00000003CD119D5750100000000FFFFFFFF54452B32392E38313023

------------------------------------


Log Entry : 12:35:56 2022年6月13日 

定时生成存储文件出现异常！Timeout expired.  The timeout period elapsed prior to completion of the operation or the server is not responding.

------------------------------------


Log Entry : 12:36:24 2022年6月13日 

处理舱内正常状态数据异常！Timeout expired.  The timeout period elapsed prior to completion of the operation or the server is not responding.

------------------------------------


Log Entry : 12:36:24 2022年6月13日 

解析数据采集器1下位机环境参数程序出现异常:Timeout expired.  The timeout period elapsed prior to completion of the operation or the server is not responding.接收到的内容:55AA00012060323032323A30363A31333A31323A33373A30373A303030000001F20000003CD119D5750100000000FFFFFFFF54452B32392E38313723

------------------------------------


Log Entry : 12:36:51 2022年6月13日 

处理舱内正常状态数据异常！Timeout expired.  The timeout period elapsed prior to completion of the operation or the server is not responding.

------------------------------------


Log Entry : 12:37:05 2022年6月13日 

解析数据采集器1下位机传感器数据程序出现异常:Timeout expired.  The timeout period elapsed prior to completion of the operation or the server is not responding.接收到的内容:55AA00010001323032323A30363A31333A31323A33373A35303A3030300000017500000040365C9A8B0100000000FFFFFFFF4E31244461746130382E30353B23

------------------------------------


Log Entry : 12:37:11 2022年6月13日 

定时生成存储文件出现异常！Timeout expired.  The timeout period elapsed prior to completion of the operation or the server is not responding.

------------------------------------


Log Entry : 12:37:44 2022年6月13日 

处理舱内正常状态数据异常！Timeout expired.  The timeout period elapsed prior to completion of the operation or the server is not responding.

------------------------------------


Log Entry : 12:37:45 2022年6月13日 

解析数据采集器1下位机传感器数据程序出现异常:Timeout expired.  The timeout period elapsed prior to completion of the operation or the server is not responding.接收到的内容:55AA00010001323032323A30363A31333A31323A33383A33313A3030300000017600000040365C9A8B0100000000FFFFFFFF4E31244461746130382E31313B23

------------------------------------


Log Entry : 12:38:23 2022年6月13日 

处理舱内正常状态数据异常！Timeout expired.  The timeout period elapsed prior to completion of the operation or the server is not responding.

------------------------------------


Log Entry : 12:38:26 2022年6月13日 

解析数据采集器1下位机传感器数据程序出现异常:Timeout expired.  The timeout period elapsed prior to completion of the operation or the server is not responding.接收到的内容:55AA00010001323032323A30363A31333A31323A33393A31313A3030300000017800000040365C9A8B0100000000FFFFFFFF4E31244461746130382E31333B23

------------------------------------


Log Entry : 12:38:26 2022年6月13日 

定时生成存储文件出现异常！Timeout expired.  The timeout period elapsed prior to completion of the operation or the server is not responding.

------------------------------------


Log Entry : 12:38:58 2022年6月13日 

给下位机发送指令异常！您的主机中的软件中止了一个已建立的连接。

------------------------------------


Log Entry : 12:39:15 2022年6月13日 

解析数据采集器1下位机传感器数据程序出现异常:Timeout expired.  The timeout period elapsed prior to completion of the operation or the server is not responding.接收到的内容:55AA00010001323032323A30363A31333A31323A33393A35313A3030300000017900000040365C9A8B0100000000FFFFFFFF4E31244461746130382E30383B23

------------------------------------


Log Entry : 12:39:15 2022年6月13日 

处理舱内正常状态数据异常！Timeout expired.  The timeout period elapsed prior to completion of the operation or the server is not responding.

------------------------------------


Log Entry : 12:39:41 2022年6月13日 

定时生成存储文件出现异常！Timeout expired.  The timeout period elapsed prior to completion of the operation or the server is not responding.

------------------------------------


Log Entry : 12:39:54 2022年6月13日 

解析数据采集器1下位机传感器数据程序出现异常:Timeout expired.  The timeout period elapsed prior to completion of the operation or the server is not responding.接收到的内容:55AA00010001323032323A30363A31333A31323A34303A33313A3030300000017A00000040365C9A8B0100000000FFFFFFFF4E31244461746130382E33303B23

------------------------------------


Log Entry : 12:40:33 2022年6月13日 

解析数据采集器1下位机传感器数据程序出现异常:Timeout expired.  The timeout period elapsed prior to completion of the operation or the server is not responding.接收到的内容:55AA00010001323032323A30363A31333A31323A34313A31313A3030300000017C00000040365C9A8B0100000000FFFFFFFF4E31244461746130382E32303B23

------------------------------------


Log Entry : 12:40:33 2022年6月13日 

处理舱内正常状态数据异常！Timeout expired.  The timeout period elapsed prior to completion of the operation or the server is not responding.

------------------------------------


Log Entry : 12:40:56 2022年6月13日 

定时生成存储文件出现异常！Timeout expired.  The timeout period elapsed prior to completion of the operation or the server is not responding.

------------------------------------


Log Entry : 12:41:00 2022年6月13日 

处理舱内正常状态数据异常！Timeout expired.  The timeout period elapsed prior to completion of the operation or the server is not responding.

------------------------------------


Log Entry : 12:41:06 2022年6月13日 

解析数据采集器1下位机传感器数据程序出现异常:Timeout expired.  The timeout period elapsed prior to completion of the operation or the server is not responding.接收到的内容:55AA00010001323032323A30363A31333A31323A34313A35323A3030300000017D00000040365C9A8B0100000000FFFFFFFF4E31244461746130382E32353B23

------------------------------------


Log Entry : 12:41:51 2022年6月13日 

处理舱内正常状态数据异常！Timeout expired.  The timeout period elapsed prior to completion of the operation or the server is not responding.

------------------------------------


Log Entry : 12:41:51 2022年6月13日 

解析数据采集器1下位机传感器数据程序出现异常:Timeout expired.  The timeout period elapsed prior to completion of the operation or the server is not responding.接收到的内容:55AA00010001323032323A30363A31333A31323A34323A33323A3030300000017E00000040365C9A8B0100000000FFFFFFFF4E31244461746130382E31393B23

------------------------------------


Log Entry : 12:42:11 2022年6月13日 

定时生成存储文件出现异常！Timeout expired.  The timeout period elapsed prior to completion of the operation or the server is not responding.

------------------------------------


Log Entry : 12:42:30 2022年6月13日 

处理舱内正常状态数据异常！Timeout expired.  The timeout period elapsed prior to completion of the operation or the server is not responding.

------------------------------------


Log Entry : 12:43:09 2022年6月13日 

解析数据采集器1下位机环境参数程序出现异常:Timeout expired.  The timeout period elapsed prior to completion of the operation or the server is not responding.接收到的内容:55AA00012060323032323A30363A31333A31323A34333A33313A303030000002030000003CD119D5750100000000FFFFFFFF54452B32392E38323523

------------------------------------


Log Entry : 12:43:14 2022年6月13日 

处理舱内正常状态数据异常！Timeout expired.  The timeout period elapsed prior to completion of the operation or the server is not responding.

------------------------------------


Log Entry : 12:43:26 2022年6月13日 

定时生成存储文件出现异常！Timeout expired.  The timeout period elapsed prior to completion of the operation or the server is not responding.

------------------------------------


Log Entry : 12:43:48 2022年6月13日 

解析数据采集器1下位机传感器数据程序出现异常:Timeout expired.  The timeout period elapsed prior to completion of the operation or the server is not responding.接收到的内容:55AA00010001323032323A30363A31333A31323A34343A33323A3030300000018200000040365C9A8B0100000000FFFFFFFF4E31244461746130382E31373B23

------------------------------------


Log Entry : 12:44:00 2022年6月13日 

处理舱内正常状态数据异常！Timeout expired.  The timeout period elapsed prior to completion of the operation or the server is not responding.

------------------------------------


Log Entry : 12:44:39 2022年6月13日 

解析数据采集器1下位机环境参数程序出现异常:Timeout expired.  The timeout period elapsed prior to completion of the operation or the server is not responding.接收到的内容:55AA00012060323032323A30363A31333A31323A34353A30323A303030000002070000003CD119D5750100000000FFFFFFFF54452B32392E38333323

------------------------------------


Log Entry : 12:44:41 2022年6月13日 

定时生成存储文件出现异常！Timeout expired.  The timeout period elapsed prior to completion of the operation or the server is not responding.

------------------------------------


Log Entry : 12:44:45 2022年6月13日 

处理舱内正常状态数据异常！Timeout expired.  The timeout period elapsed prior to completion of the operation or the server is not responding.

------------------------------------


Log Entry : 12:45:19 2022年6月13日 

解析数据采集器1下位机传感器数据程序出现异常:Timeout expired.  The timeout period elapsed prior to completion of the operation or the server is not responding.接收到的内容:55AA00010001323032323A30363A31333A31323A34353A35333A3030300000018500000040365C9A8B0100000000FFFFFFFF4E31244461746130382E32303B23

------------------------------------


Log Entry : 12:45:30 2022年6月13日 

处理舱内正常状态数据异常！Timeout expired.  The timeout period elapsed prior to completion of the operation or the server is not responding.

------------------------------------


Log Entry : 12:45:57 2022年6月13日 

定时生成存储文件出现异常！Timeout expired.  The timeout period elapsed prior to completion of the operation or the server is not responding.

------------------------------------


Log Entry : 12:46:10 2022年6月13日 

解析数据采集器1下位机传感器数据程序出现异常:Timeout expired.  The timeout period elapsed prior to completion of the operation or the server is not responding.接收到的内容:55AA00010001323032323A30363A31333A31323A34363A33333A3030300000018600000040365C9A8B0100000000FFFFFFFF4E31244461746130382E31383B23

------------------------------------


Log Entry : 12:46:16 2022年6月13日 

处理舱内正常状态数据异常！Timeout expired.  The timeout period elapsed prior to completion of the operation or the server is not responding.

------------------------------------


Log Entry : 12:46:55 2022年6月13日 

解析数据采集器1下位机环境参数程序出现异常:Timeout expired.  The timeout period elapsed prior to completion of the operation or the server is not responding.接收到的内容:55AA00012060323032323A30363A31333A31323A34373A34303A3030300000020E0000003CD119D5750100000000FFFFFFFF54452B32392E38343023

------------------------------------


Log Entry : 12:47:01 2022年6月13日 

处理舱内正常状态数据异常！Timeout expired.  The timeout period elapsed prior to completion of the operation or the server is not responding.

------------------------------------


Log Entry : 12:47:12 2022年6月13日 

定时生成存储文件出现异常！Timeout expired.  The timeout period elapsed prior to completion of the operation or the server is not responding.

------------------------------------


Log Entry : 12:47:46 2022年6月13日 

解析数据采集器1下位机环境参数程序出现异常:Timeout expired.  The timeout period elapsed prior to completion of the operation or the server is not responding.接收到的内容:55AA00012060323032323A30363A31333A31323A34383A32353A303030000002100000003CD119D5750100000000FFFFFFFF54452B32392E38343423

------------------------------------


Log Entry : 12:47:48 2022年6月13日 

处理舱内正常状态数据异常！Timeout expired.  The timeout period elapsed prior to completion of the operation or the server is not responding.

------------------------------------


Log Entry : 12:48:25 2022年6月13日 

解析数据采集器1下位机环境参数程序出现异常:Timeout expired.  The timeout period elapsed prior to completion of the operation or the server is not responding.接收到的内容:55AA00012060323032323A30363A31333A31323A34393A31313A303030000002120000003CD119D5750100000000FFFFFFFF54452B32392E38343823

------------------------------------


Log Entry : 12:48:27 2022年6月13日 

定时生成存储文件出现异常！Timeout expired.  The timeout period elapsed prior to completion of the operation or the server is not responding.

------------------------------------


Log Entry : 12:48:32 2022年6月13日 

处理舱内正常状态数据异常！Timeout expired.  The timeout period elapsed prior to completion of the operation or the server is not responding.

------------------------------------


Log Entry : 12:48:59 2022年6月13日 

给下位机发送指令异常！您的主机中的软件中止了一个已建立的连接。

------------------------------------


Log Entry : 12:49:17 2022年6月13日 

解析数据采集器1下位机传感器数据程序出现异常:Timeout expired.  The timeout period elapsed prior to completion of the operation or the server is not responding.接收到的内容:55AA00010001323032323A30363A31333A31323A34393A35343A3030300000018D00000040365C9A8B0100000000FFFFFFFF4E31244461746130382E31363B23

------------------------------------


Log Entry : 12:49:19 2022年6月13日 

处理舱内正常状态数据异常！Timeout expired.  The timeout period elapsed prior to completion of the operation or the server is not responding.

------------------------------------


Log Entry : 12:49:42 2022年6月13日 

定时生成存储文件出现异常！Timeout expired.  The timeout period elapsed prior to completion of the operation or the server is not responding.

------------------------------------


Log Entry : 12:49:56 2022年6月13日 

解析数据采集器1下位机传感器数据程序出现异常:Timeout expired.  The timeout period elapsed prior to completion of the operation or the server is not responding.接收到的内容:55AA00010001323032323A30363A31333A31323A35303A33343A3030300000018E00000040365C9A8B0100000000FFFFFFFF4E31244461746130382E30383B23

------------------------------------


Log Entry : 12:50:02 2022年6月13日 

处理舱内正常状态数据异常！Timeout expired.  The timeout period elapsed prior to completion of the operation or the server is not responding.

------------------------------------


Log Entry : 12:50:47 2022年6月13日 

解析数据采集器1下位机传感器数据程序出现异常:Timeout expired.  The timeout period elapsed prior to completion of the operation or the server is not responding.接收到的内容:55AA00010001323032323A30363A31333A31323A35313A31353A3030300000019000000040365C9A8B0100000000FFFFFFFF4E31244461746130382E32303B23

------------------------------------


Log Entry : 12:50:49 2022年6月13日 

处理舱内正常状态数据异常！Timeout expired.  The timeout period elapsed prior to completion of the operation or the server is not responding.

------------------------------------


Log Entry : 12:50:57 2022年6月13日 

定时生成存储文件出现异常！Timeout expired.  The timeout period elapsed prior to completion of the operation or the server is not responding.

------------------------------------


Log Entry : 12:51:26 2022年6月13日 

解析数据采集器1下位机环境参数程序出现异常:Timeout expired.  The timeout period elapsed prior to completion of the operation or the server is not responding.接收到的内容:55AA00012060323032323A30363A31333A31323A35323A31323A3030300000021A0000003CD119D5750100000000FFFFFFFF54452B32392E38363623

------------------------------------


Log Entry : 12:51:33 2022年6月13日 

处理舱内正常状态数据异常！Timeout expired.  The timeout period elapsed prior to completion of the operation or the server is not responding.

------------------------------------


Log Entry : 12:52:12 2022年6月13日 

定时生成存储文件出现异常！Timeout expired.  The timeout period elapsed prior to completion of the operation or the server is not responding.

------------------------------------


Log Entry : 12:52:18 2022年6月13日 

解析数据采集器1下位机环境参数程序出现异常:Timeout expired.  The timeout period elapsed prior to completion of the operation or the server is not responding.接收到的内容:55AA00012060323032323A30363A31333A31323A35323A35373A3030300000021C0000003CD119D5750100000000FFFFFFFF54452B32392E38373123

------------------------------------


Log Entry : 12:52:19 2022年6月13日 

处理舱内正常状态数据异常！Timeout expired.  The timeout period elapsed prior to completion of the operation or the server is not responding.

------------------------------------


Log Entry : 12:52:57 2022年6月13日 

解析数据采集器1下位机环境参数程序出现异常:Timeout expired.  The timeout period elapsed prior to completion of the operation or the server is not responding.接收到的内容:55AA00012060323032323A30363A31333A31323A35333A34323A3030300000021E0000003CD119D5750100000000FFFFFFFF54452B32392E38373523

------------------------------------


Log Entry : 12:53:04 2022年6月13日 

处理舱内正常状态数据异常！Timeout expired.  The timeout period elapsed prior to completion of the operation or the server is not responding.

------------------------------------


Log Entry : 12:53:27 2022年6月13日 

定时生成存储文件出现异常！Timeout expired.  The timeout period elapsed prior to completion of the operation or the server is not responding.

------------------------------------


Log Entry : 12:53:48 2022年6月13日 

解析数据采集器1下位机环境参数程序出现异常:Timeout expired.  The timeout period elapsed prior to completion of the operation or the server is not responding.接收到的内容:55AA00012060323032323A30363A31333A31323A35343A32373A303030000002200000003CD119D5750100000000FFFFFFFF54452B32392E38373923

------------------------------------


Log Entry : 12:53:50 2022年6月13日 

处理舱内正常状态数据异常！Timeout expired.  The timeout period elapsed prior to completion of the operation or the server is not responding.

------------------------------------


Log Entry : 12:54:27 2022年6月13日 

解析数据采集器1下位机环境参数程序出现异常:Timeout expired.  The timeout period elapsed prior to completion of the operation or the server is not responding.接收到的内容:55AA00012060323032323A30363A31333A31323A35353A31333A303030000002220000003CD119D5750100000000FFFFFFFF54452B32392E38383723

------------------------------------


Log Entry : 12:54:34 2022年6月13日 

处理舱内正常状态数据异常！Timeout expired.  The timeout period elapsed prior to completion of the operation or the server is not responding.

------------------------------------


Log Entry : 12:54:42 2022年6月13日 

定时生成存储文件出现异常！Timeout expired.  The timeout period elapsed prior to completion of the operation or the server is not responding.

------------------------------------


Log Entry : 12:55:19 2022年6月13日 

解析数据采集器1下位机传感器数据程序出现异常:Timeout expired.  The timeout period elapsed prior to completion of the operation or the server is not responding.接收到的内容:55AA00010001323032323A30363A31333A31323A35353A35363A3030300000019900000040365C9A8B0100000000FFFFFFFF4E31244461746130382E30363B23

------------------------------------


Log Entry : 12:55:20 2022年6月13日 

处理舱内正常状态数据异常！Timeout expired.  The timeout period elapsed prior to completion of the operation or the server is not responding.

------------------------------------


Log Entry : 12:55:57 2022年6月13日 

定时生成存储文件出现异常！Timeout expired.  The timeout period elapsed prior to completion of the operation or the server is not responding.

------------------------------------


Log Entry : 12:55:58 2022年6月13日 

解析数据采集器1下位机传感器数据程序出现异常:Timeout expired.  The timeout period elapsed prior to completion of the operation or the server is not responding.接收到的内容:55AA00010001323032323A30363A31333A31323A35363A33363A3030300000019A00000040365C9A8B0100000000FFFFFFFF4E31244461746130382E30383B23

------------------------------------


Log Entry : 12:56:05 2022年6月13日 

处理舱内正常状态数据异常！Timeout expired.  The timeout period elapsed prior to completion of the operation or the server is not responding.

------------------------------------


Log Entry : 12:56:49 2022年6月13日 

解析数据采集器1下位机传感器数据程序出现异常:Timeout expired.  The timeout period elapsed prior to completion of the operation or the server is not responding.接收到的内容:55AA00010001323032323A30363A31333A31323A35373A31373A3030300000019C00000040365C9A8B0100000000FFFFFFFF4E31244461746130382E31343B23

------------------------------------


Log Entry : 12:56:51 2022年6月13日 

处理舱内正常状态数据异常！Timeout expired.  The timeout period elapsed prior to completion of the operation or the server is not responding.

------------------------------------


Log Entry : 12:57:12 2022年6月13日 

定时生成存储文件出现异常！Timeout expired.  The timeout period elapsed prior to completion of the operation or the server is not responding.

------------------------------------


Log Entry : 12:57:28 2022年6月13日 

解析数据采集器1下位机环境参数程序出现异常:Timeout expired.  The timeout period elapsed prior to completion of the operation or the server is not responding.接收到的内容:55AA00012060323032323A30363A31333A31323A35383A31343A3030300000022A0000003CD119D5750100000000FFFFFFFF54452B32392E39313023

------------------------------------


Log Entry : 12:57:36 2022年6月13日 

处理舱内正常状态数据异常！Timeout expired.  The timeout period elapsed prior to completion of the operation or the server is not responding.

------------------------------------


Log Entry : 12:58:19 2022年6月13日 

解析数据采集器1下位机环境参数程序出现异常:Timeout expired.  The timeout period elapsed prior to completion of the operation or the server is not responding.接收到的内容:55AA00012060323032323A30363A31333A31323A35383A35393A3030300000022C0000003CD119D5750100000000FFFFFFFF54452B32392E39313423

------------------------------------


Log Entry : 12:58:21 2022年6月13日 

处理舱内正常状态数据异常！Timeout expired.  The timeout period elapsed prior to completion of the operation or the server is not responding.

------------------------------------


Log Entry : 12:58:27 2022年6月13日 

定时生成存储文件出现异常！Timeout expired.  The timeout period elapsed prior to completion of the operation or the server is not responding.

------------------------------------


Log Entry : 12:58:59 2022年6月13日 

解析数据采集器1下位机环境参数程序出现异常:Timeout expired.  The timeout period elapsed prior to completion of the operation or the server is not responding.接收到的内容:55AA00012060323032323A30363A31333A31323A35393A34343A3030300000022E0000003CD119D5750100000000FFFFFFFF54452B32392E39323123

------------------------------------


Log Entry : 12:59:00 2022年6月13日 

给下位机发送指令异常！您的主机中的软件中止了一个已建立的连接。

------------------------------------


Log Entry : 12:59:07 2022年6月13日 

处理舱内正常状态数据异常！Timeout expired.  The timeout period elapsed prior to completion of the operation or the server is not responding.

------------------------------------


Log Entry : 12:59:42 2022年6月13日 

定时生成存储文件出现异常！Timeout expired.  The timeout period elapsed prior to completion of the operation or the server is not responding.

------------------------------------


Log Entry : 12:59:50 2022年6月13日 

解析数据采集器1下位机环境参数程序出现异常:Timeout expired.  The timeout period elapsed prior to completion of the operation or the server is not responding.接收到的内容:55AA00012060323032323A30363A31333A31333A30303A32393A303030000002300000003CD119D5750100000000FFFFFFFF54452B32392E39323523

------------------------------------


Log Entry : 12:59:52 2022年6月13日 

处理舱内正常状态数据异常！Timeout expired.  The timeout period elapsed prior to completion of the operation or the server is not responding.

------------------------------------


Log Entry : 13:00:29 2022年6月13日 

解析数据采集器1下位机环境参数程序出现异常:Timeout expired.  The timeout period elapsed prior to completion of the operation or the server is not responding.接收到的内容:55AA00012060323032323A30363A31333A31333A30313A31343A303030000002320000003CD119D5750100000000FFFFFFFF54452B32392E39333323

------------------------------------


Log Entry : 13:00:37 2022年6月13日 

处理舱内正常状态数据异常！Timeout expired.  The timeout period elapsed prior to completion of the operation or the server is not responding.

------------------------------------


Log Entry : 13:00:57 2022年6月13日 

定时生成存储文件出现异常！Timeout expired.  The timeout period elapsed prior to completion of the operation or the server is not responding.

------------------------------------


Log Entry : 13:01:20 2022年6月13日 

解析数据采集器1下位机传感器数据程序出现异常:Timeout expired.  The timeout period elapsed prior to completion of the operation or the server is not responding.接收到的内容:55AA00010001323032323A30363A31333A31333A30313A35383A303030000001A500000040365C9A8B0100000000FFFFFFFF4E31244461746130382E32363B23

------------------------------------


Log Entry : 13:01:23 2022年6月13日 

处理舱内正常状态数据异常！Timeout expired.  The timeout period elapsed prior to completion of the operation or the server is not responding.

------------------------------------


Log Entry : 13:02:00 2022年6月13日 

解析数据采集器1下位机传感器数据程序出现异常:Timeout expired.  The timeout period elapsed prior to completion of the operation or the server is not responding.接收到的内容:55AA00010001323032323A30363A31333A31333A30323A33393A303030000001A600000040365C9A8B0100000000FFFFFFFF4E31244461746130382E33343B23

------------------------------------


Log Entry : 13:02:08 2022年6月13日 

处理舱内正常状态数据异常！Timeout expired.  The timeout period elapsed prior to completion of the operation or the server is not responding.

------------------------------------


Log Entry : 13:02:12 2022年6月13日 

定时生成存储文件出现异常！Timeout expired.  The timeout period elapsed prior to completion of the operation or the server is not responding.

------------------------------------


Log Entry : 13:02:51 2022年6月13日 

解析数据采集器1下位机传感器数据程序出现异常:Timeout expired.  The timeout period elapsed prior to completion of the operation or the server is not responding.接收到的内容:55AA00010001323032323A30363A31333A31333A30333A31393A303030000001A800000040365C9A8B0100000000FFFFFFFF4E31244461746130382E33343B23

------------------------------------


Log Entry : 13:02:53 2022年6月13日 

处理舱内正常状态数据异常！Timeout expired.  The timeout period elapsed prior to completion of the operation or the server is not responding.

------------------------------------


Log Entry : 13:03:28 2022年6月13日 

定时生成存储文件出现异常！Timeout expired.  The timeout period elapsed prior to completion of the operation or the server is not responding.

------------------------------------


Log Entry : 13:03:30 2022年6月13日 

解析数据采集器1下位机传感器数据程序出现异常:Timeout expired.  The timeout period elapsed prior to completion of the operation or the server is not responding.接收到的内容:55AA00010001323032323A30363A31333A31333A30343A30393A303030000001AA00000040365C9A8B0100000000FFFFFFFF4E31244461746130382E33303B23

------------------------------------


Log Entry : 13:03:39 2022年6月13日 

处理舱内正常状态数据异常！Timeout expired.  The timeout period elapsed prior to completion of the operation or the server is not responding.

------------------------------------


Log Entry : 13:04:21 2022年6月13日 

解析数据采集器1下位机环境参数程序出现异常:Timeout expired.  The timeout period elapsed prior to completion of the operation or the server is not responding.接收到的内容:55AA00012060323032323A30363A31333A31333A30353A30313A3030300000023C0000003CD119D5750100000000FFFFFFFF54452B32392E39363723

------------------------------------


Log Entry : 13:04:24 2022年6月13日 

处理舱内正常状态数据异常！Timeout expired.  The timeout period elapsed prior to completion of the operation or the server is not responding.

------------------------------------


Log Entry : 13:04:43 2022年6月13日 

定时生成存储文件出现异常！Timeout expired.  The timeout period elapsed prior to completion of the operation or the server is not responding.

------------------------------------


Log Entry : 13:05:01 2022年6月13日 

解析数据采集器1下位机环境参数程序出现异常:Timeout expired.  The timeout period elapsed prior to completion of the operation or the server is not responding.接收到的内容:55AA00012060323032323A30363A31333A31333A30353A34363A3030300000023E0000003CD119D5750100000000FFFFFFFF54452B32392E39373123

------------------------------------


Log Entry : 13:05:09 2022年6月13日 

处理舱内正常状态数据异常！Timeout expired.  The timeout period elapsed prior to completion of the operation or the server is not responding.

------------------------------------


Log Entry : 13:05:52 2022年6月13日 

解析数据采集器1下位机环境参数程序出现异常:Timeout expired.  The timeout period elapsed prior to completion of the operation or the server is not responding.接收到的内容:55AA00012060323032323A30363A31333A31333A30363A33313A303030000002400000003CD119D5750100000000FFFFFFFF54452B32392E39373923

------------------------------------


Log Entry : 13:05:55 2022年6月13日 

处理舱内正常状态数据异常！Timeout expired.  The timeout period elapsed prior to completion of the operation or the server is not responding.

------------------------------------


Log Entry : 13:05:58 2022年6月13日 

定时生成存储文件出现异常！Timeout expired.  The timeout period elapsed prior to completion of the operation or the server is not responding.

------------------------------------


Log Entry : 13:06:31 2022年6月13日 

解析数据采集器1下位机环境参数程序出现异常:Timeout expired.  The timeout period elapsed prior to completion of the operation or the server is not responding.接收到的内容:55AA00012060323032323A30363A31333A31333A30373A31363A303030000002420000003CD119D5750100000000FFFFFFFF54452B32392E39383723

------------------------------------


Log Entry : 13:06:40 2022年6月13日 

处理舱内正常状态数据异常！Timeout expired.  The timeout period elapsed prior to completion of the operation or the server is not responding.

------------------------------------


Log Entry : 13:07:13 2022年6月13日 

定时生成存储文件出现异常！Timeout expired.  The timeout period elapsed prior to completion of the operation or the server is not responding.

------------------------------------


Log Entry : 13:07:22 2022年6月13日 

解析数据采集器1下位机传感器数据程序出现异常:Timeout expired.  The timeout period elapsed prior to completion of the operation or the server is not responding.接收到的内容:55AA00010001323032323A30363A31333A31333A30383A30303A303030000001B100000040365C9A8B0100000000FFFFFFFF4E31244461746130382E31393B23

------------------------------------


Log Entry : 13:07:25 2022年6月13日 

处理舱内正常状态数据异常！Timeout expired.  The timeout period elapsed prior to completion of the operation or the server is not responding.

------------------------------------


Log Entry : 13:08:01 2022年6月13日 

解析数据采集器1下位机传感器数据程序出现异常:Timeout expired.  The timeout period elapsed prior to completion of the operation or the server is not responding.接收到的内容:55AA00010001323032323A30363A31333A31333A30383A34303A303030000001B300000040365C9A8B0100000000FFFFFFFF4E31244461746130382E32363B23

------------------------------------


Log Entry : 13:08:11 2022年6月13日 

处理舱内正常状态数据异常！Timeout expired.  The timeout period elapsed prior to completion of the operation or the server is not responding.

------------------------------------


Log Entry : 13:08:28 2022年6月13日 

定时生成存储文件出现异常！Timeout expired.  The timeout period elapsed prior to completion of the operation or the server is not responding.

------------------------------------


Log Entry : 13:08:53 2022年6月13日 

解析数据采集器1下位机传感器数据程序出现异常:Timeout expired.  The timeout period elapsed prior to completion of the operation or the server is not responding.接收到的内容:55AA00010001323032323A30363A31333A31333A30393A32303A303030000001B400000040365C9A8B0100000000FFFFFFFF4E31244461746130382E30393B23

------------------------------------


Log Entry : 13:08:56 2022年6月13日 

处理舱内正常状态数据异常！Timeout expired.  The timeout period elapsed prior to completion of the operation or the server is not responding.

------------------------------------


Log Entry : 13:09:01 2022年6月13日 

给下位机发送指令异常！您的主机中的软件中止了一个已建立的连接。

------------------------------------


Log Entry : 13:09:32 2022年6月13日 

解析数据采集器1下位机传感器数据程序出现异常:Timeout expired.  The timeout period elapsed prior to completion of the operation or the server is not responding.接收到的内容:55AA00010001323032323A30363A31333A31333A31303A30393A303030000001B600000040365C9A8B0100000000FFFFFFFF4E31244461746130382E31303B23

------------------------------------


Log Entry : 13:09:41 2022年6月13日 

处理舱内正常状态数据异常！Timeout expired.  The timeout period elapsed prior to completion of the operation or the server is not responding.

------------------------------------


Log Entry : 13:09:43 2022年6月13日 

定时生成存储文件出现异常！Timeout expired.  The timeout period elapsed prior to completion of the operation or the server is not responding.

------------------------------------


Log Entry : 13:10:23 2022年6月13日 

解析数据采集器1下位机环境参数程序出现异常:Timeout expired.  The timeout period elapsed prior to completion of the operation or the server is not responding.接收到的内容:55AA00012060323032323A30363A31333A31333A31313A30333A3030300000024C0000003CD119D5750100000000FFFFFFFF54452B33302E30323123

------------------------------------


Log Entry : 13:10:27 2022年6月13日 

处理舱内正常状态数据异常！Timeout expired.  The timeout period elapsed prior to completion of the operation or the server is not responding.

------------------------------------


Log Entry : 13:10:58 2022年6月13日 

定时生成存储文件出现异常！Timeout expired.  The timeout period elapsed prior to completion of the operation or the server is not responding.

------------------------------------


Log Entry : 13:11:03 2022年6月13日 

解析数据采集器1下位机环境参数程序出现异常:Timeout expired.  The timeout period elapsed prior to completion of the operation or the server is not responding.接收到的内容:55AA00012060323032323A30363A31333A31333A31313A34383A3030300000024E0000003CD119D5750100000000FFFFFFFF54452B33302E30333023

------------------------------------


Log Entry : 13:11:12 2022年6月13日 

处理舱内正常状态数据异常！Timeout expired.  The timeout period elapsed prior to completion of the operation or the server is not responding.

------------------------------------


Log Entry : 13:11:54 2022年6月13日 

解析数据采集器1下位机环境参数程序出现异常:Timeout expired.  The timeout period elapsed prior to completion of the operation or the server is not responding.接收到的内容:55AA00012060323032323A30363A31333A31333A31323A33333A303030000002500000003CD119D5750100000000FFFFFFFF54452B33302E30333923

------------------------------------


Log Entry : 13:11:57 2022年6月13日 

处理舱内正常状态数据异常！Timeout expired.  The timeout period elapsed prior to completion of the operation or the server is not responding.

------------------------------------


Log Entry : 13:12:13 2022年6月13日 

定时生成存储文件出现异常！Timeout expired.  The timeout period elapsed prior to completion of the operation or the server is not responding.

------------------------------------


Log Entry : 13:12:33 2022年6月13日 

解析数据采集器1下位机环境参数程序出现异常:Timeout expired.  The timeout period elapsed prior to completion of the operation or the server is not responding.接收到的内容:55AA00012060323032323A30363A31333A31333A31333A31383A303030000002520000003CD119D5750100000000FFFFFFFF54452B33302E30343923

------------------------------------


Log Entry : 13:12:43 2022年6月13日 

处理舱内正常状态数据异常！Timeout expired.  The timeout period elapsed prior to completion of the operation or the server is not responding.

------------------------------------


Log Entry : 13:13:24 2022年6月13日 

解析数据采集器1下位机传感器数据程序出现异常:Timeout expired.  The timeout period elapsed prior to completion of the operation or the server is not responding.接收到的内容:55AA00010001323032323A30363A31333A31333A31343A30323A303030000001BD00000040365C9A8B0100000000FFFFFFFF4E31244461746130382E30383B23

------------------------------------


Log Entry : 13:13:28 2022年6月13日 

定时生成存储文件出现异常！Timeout expired.  The timeout period elapsed prior to completion of the operation or the server is not responding.

------------------------------------


Log Entry : 13:13:28 2022年6月13日 

处理舱内正常状态数据异常！Timeout expired.  The timeout period elapsed prior to completion of the operation or the server is not responding.

------------------------------------


Log Entry : 13:14:03 2022年6月13日 

解析数据采集器1下位机传感器数据程序出现异常:Timeout expired.  The timeout period elapsed prior to completion of the operation or the server is not responding.接收到的内容:55AA00010001323032323A30363A31333A31333A31343A34323A303030000001BF00000040365C9A8B0100000000FFFFFFFF4E31244461746130382E31343B23

------------------------------------


Log Entry : 13:14:13 2022年6月13日 

处理舱内正常状态数据异常！Timeout expired.  The timeout period elapsed prior to completion of the operation or the server is not responding.

------------------------------------


Log Entry : 13:14:43 2022年6月13日 

定时生成存储文件出现异常！Timeout expired.  The timeout period elapsed prior to completion of the operation or the server is not responding.

------------------------------------


Log Entry : 13:14:54 2022年6月13日 

解析数据采集器1下位机传感器数据程序出现异常:Timeout expired.  The timeout period elapsed prior to completion of the operation or the server is not responding.接收到的内容:55AA00010001323032323A30363A31333A31333A31353A32323A303030000001C000000040365C9A8B0100000000FFFFFFFF4E31244461746130382E31363B23

------------------------------------


Log Entry : 13:14:59 2022年6月13日 

处理舱内正常状态数据异常！Timeout expired.  The timeout period elapsed prior to completion of the operation or the server is not responding.

------------------------------------


Log Entry : 13:15:34 2022年6月13日 

解析数据采集器1下位机传感器数据程序出现异常:Timeout expired.  The timeout period elapsed prior to completion of the operation or the server is not responding.接收到的内容:55AA00010001323032323A30363A31333A31333A31363A30393A303030000001C200000040365C9A8B0100000000FFFFFFFF4E31244461746130372E39393B23

------------------------------------


Log Entry : 13:15:44 2022年6月13日 

处理舱内正常状态数据异常！Timeout expired.  The timeout period elapsed prior to completion of the operation or the server is not responding.

------------------------------------


Log Entry : 13:15:58 2022年6月13日 

定时生成存储文件出现异常！Timeout expired.  The timeout period elapsed prior to completion of the operation or the server is not responding.

------------------------------------


Log Entry : 13:16:25 2022年6月13日 

解析数据采集器1下位机环境参数程序出现异常:Timeout expired.  The timeout period elapsed prior to completion of the operation or the server is not responding.接收到的内容:55AA00012060323032323A30363A31333A31333A31373A30353A3030300000025C0000003CD119D5750100000000FFFFFFFF54452B33302E30393023

------------------------------------


Log Entry : 13:16:30 2022年6月13日 

处理舱内正常状态数据异常！Timeout expired.  The timeout period elapsed prior to completion of the operation or the server is not responding.

------------------------------------


Log Entry : 13:17:05 2022年6月13日 

解析数据采集器1下位机环境参数程序出现异常:Timeout expired.  The timeout period elapsed prior to completion of the operation or the server is not responding.接收到的内容:55AA00012060323032323A30363A31333A31333A31373A35303A3030300000025E0000003CD119D5750100000000FFFFFFFF54452B33302E31303123

------------------------------------


Log Entry : 13:17:13 2022年6月13日 

定时生成存储文件出现异常！Timeout expired.  The timeout period elapsed prior to completion of the operation or the server is not responding.

------------------------------------


Log Entry : 13:17:15 2022年6月13日 

处理舱内正常状态数据异常！Timeout expired.  The timeout period elapsed prior to completion of the operation or the server is not responding.

------------------------------------


Log Entry : 13:17:56 2022年6月13日 

解析数据采集器1下位机环境参数程序出现异常:Timeout expired.  The timeout period elapsed prior to completion of the operation or the server is not responding.接收到的内容:55AA00012060323032323A30363A31333A31333A31383A33353A303030000002600000003CD119D5750100000000FFFFFFFF54452B33302E31303823

------------------------------------


Log Entry : 13:18:00 2022年6月13日 

处理舱内正常状态数据异常！Timeout expired.  The timeout period elapsed prior to completion of the operation or the server is not responding.

------------------------------------


Log Entry : 13:18:28 2022年6月13日 

定时生成存储文件出现异常！Timeout expired.  The timeout period elapsed prior to completion of the operation or the server is not responding.

------------------------------------


Log Entry : 13:18:35 2022年6月13日 

解析数据采集器1下位机环境参数程序出现异常:Timeout expired.  The timeout period elapsed prior to completion of the operation or the server is not responding.接收到的内容:55AA00012060323032323A30363A31333A31333A31393A32303A303030000002620000003CD119D5750100000000FFFFFFFF54452B33302E31313823

------------------------------------


Log Entry : 13:18:46 2022年6月13日 

处理舱内正常状态数据异常！Timeout expired.  The timeout period elapsed prior to completion of the operation or the server is not responding.

------------------------------------


Log Entry : 13:19:02 2022年6月13日 

给下位机发送指令异常！您的主机中的软件中止了一个已建立的连接。

------------------------------------


Log Entry : 13:19:26 2022年6月13日 

解析数据采集器1下位机传感器数据程序出现异常:Timeout expired.  The timeout period elapsed prior to completion of the operation or the server is not responding.接收到的内容:55AA00010001323032323A30363A31333A31333A32303A30343A303030000001C900000040365C9A8B0100000000FFFFFFFF4E31244461746130382E31393B23

------------------------------------


Log Entry : 13:19:31 2022年6月13日 

处理舱内正常状态数据异常！Timeout expired.  The timeout period elapsed prior to completion of the operation or the server is not responding.

------------------------------------


Log Entry : 13:19:43 2022年6月13日 

定时生成存储文件出现异常！Timeout expired.  The timeout period elapsed prior to completion of the operation or the server is not responding.

------------------------------------


Log Entry : 13:20:05 2022年6月13日 

解析数据采集器1下位机传感器数据程序出现异常:Timeout expired.  The timeout period elapsed prior to completion of the operation or the server is not responding.接收到的内容:55AA00010001323032323A30363A31333A31333A32303A34343A303030000001CB00000040365C9A8B0100000000FFFFFFFF4E31244461746130382E31323B23

------------------------------------


Log Entry : 13:20:16 2022年6月13日 

处理舱内正常状态数据异常！Timeout expired.  The timeout period elapsed prior to completion of the operation or the server is not responding.

------------------------------------


Log Entry : 13:20:57 2022年6月13日 

解析数据采集器1下位机传感器数据程序出现异常:Timeout expired.  The timeout period elapsed prior to completion of the operation or the server is not responding.接收到的内容:55AA00010001323032323A30363A31333A31333A32313A32343A303030000001CC00000040365C9A8B0100000000FFFFFFFF4E31244461746130382E31363B23

------------------------------------


Log Entry : 13:20:59 2022年6月13日 

定时生成存储文件出现异常！Timeout expired.  The timeout period elapsed prior to completion of the operation or the server is not responding.

------------------------------------


Log Entry : 13:21:02 2022年6月13日 

处理舱内正常状态数据异常！Timeout expired.  The timeout period elapsed prior to completion of the operation or the server is not responding.

------------------------------------


Log Entry : 13:21:36 2022年6月13日 

解析数据采集器1下位机传感器数据程序出现异常:Timeout expired.  The timeout period elapsed prior to completion of the operation or the server is not responding.接收到的内容:55AA00010001323032323A30363A31333A31333A32323A31303A303030000001CE00000040365C9A8B0100000000FFFFFFFF4E31244461746130382E30353B23

------------------------------------


Log Entry : 13:21:47 2022年6月13日 

处理舱内正常状态数据异常！Timeout expired.  The timeout period elapsed prior to completion of the operation or the server is not responding.

------------------------------------


Log Entry : 13:22:14 2022年6月13日 

定时生成存储文件出现异常！Timeout expired.  The timeout period elapsed prior to completion of the operation or the server is not responding.

------------------------------------


Log Entry : 13:22:27 2022年6月13日 

解析数据采集器1下位机环境参数程序出现异常:Timeout expired.  The timeout period elapsed prior to completion of the operation or the server is not responding.接收到的内容:55AA00012060323032323A30363A31333A31333A32333A30373A3030300000026C0000003CD119D5750100000000FFFFFFFF54452B33302E31353923

------------------------------------


Log Entry : 13:22:32 2022年6月13日 

处理舱内正常状态数据异常！Timeout expired.  The timeout period elapsed prior to completion of the operation or the server is not responding.

------------------------------------


Log Entry : 13:23:06 2022年6月13日 

解析数据采集器1下位机环境参数程序出现异常:Timeout expired.  The timeout period elapsed prior to completion of the operation or the server is not responding.接收到的内容:55AA00012060323032323A30363A31333A31333A32333A35323A3030300000026E0000003CD119D5750100000000FFFFFFFF54452B33302E31363823

------------------------------------


Log Entry : 13:23:18 2022年6月13日 

处理舱内正常状态数据异常！Timeout expired.  The timeout period elapsed prior to completion of the operation or the server is not responding.

------------------------------------


Log Entry : 13:23:29 2022年6月13日 

定时生成存储文件出现异常！Timeout expired.  The timeout period elapsed prior to completion of the operation or the server is not responding.

------------------------------------


Log Entry : 13:23:58 2022年6月13日 

解析数据采集器1下位机环境参数程序出现异常:Timeout expired.  The timeout period elapsed prior to completion of the operation or the server is not responding.接收到的内容:55AA00012060323032323A30363A31333A31333A32343A33373A303030000002700000003CD119D5750100000000FFFFFFFF54452B33302E31373723

------------------------------------


Log Entry : 13:24:03 2022年6月13日 

处理舱内正常状态数据异常！Timeout expired.  The timeout period elapsed prior to completion of the operation or the server is not responding.

------------------------------------


Log Entry : 13:24:37 2022年6月13日 

解析数据采集器1下位机环境参数程序出现异常:Timeout expired.  The timeout period elapsed prior to completion of the operation or the server is not responding.接收到的内容:55AA00012060323032323A30363A31333A31333A32353A32323A303030000002720000003CD119D5750100000000FFFFFFFF54452B33302E31383723

------------------------------------


Log Entry : 13:24:44 2022年6月13日 

定时生成存储文件出现异常！Timeout expired.  The timeout period elapsed prior to completion of the operation or the server is not responding.

------------------------------------


Log Entry : 13:24:48 2022年6月13日 

处理舱内正常状态数据异常！Timeout expired.  The timeout period elapsed prior to completion of the operation or the server is not responding.

------------------------------------


Log Entry : 13:25:28 2022年6月13日 

解析数据采集器1下位机传感器数据程序出现异常:Timeout expired.  The timeout period elapsed prior to completion of the operation or the server is not responding.接收到的内容:55AA00010001323032323A30363A31333A31333A32363A30363A303030000001D500000040365C9A8B0100000000FFFFFFFF4E31244461746130382E31333B23

------------------------------------


Log Entry : 13:25:34 2022年6月13日 

处理舱内正常状态数据异常！Timeout expired.  The timeout period elapsed prior to completion of the operation or the server is not responding.

------------------------------------


Log Entry : 13:25:59 2022年6月13日 

定时生成存储文件出现异常！Timeout expired.  The timeout period elapsed prior to completion of the operation or the server is not responding.

------------------------------------


Log Entry : 13:26:07 2022年6月13日 

解析数据采集器1下位机传感器数据程序出现异常:Timeout expired.  The timeout period elapsed prior to completion of the operation or the server is not responding.接收到的内容:55AA00010001323032323A30363A31333A31333A32363A34363A303030000001D700000040365C9A8B0100000000FFFFFFFF4E31244461746130382E32313B23

------------------------------------


Log Entry : 13:26:19 2022年6月13日 

处理舱内正常状态数据异常！Timeout expired.  The timeout period elapsed prior to completion of the operation or the server is not responding.

------------------------------------


Log Entry : 13:26:59 2022年6月13日 

解析数据采集器1下位机传感器数据程序出现异常:Timeout expired.  The timeout period elapsed prior to completion of the operation or the server is not responding.接收到的内容:55AA00010001323032323A30363A31333A31333A32373A32363A303030000001D800000040365C9A8B0100000000FFFFFFFF4E31244461746130382E31303B23

------------------------------------


Log Entry : 13:27:04 2022年6月13日 

处理舱内正常状态数据异常！Timeout expired.  The timeout period elapsed prior to completion of the operation or the server is not responding.

------------------------------------


Log Entry : 13:27:14 2022年6月13日 

定时生成存储文件出现异常！Timeout expired.  The timeout period elapsed prior to completion of the operation or the server is not responding.

------------------------------------


Log Entry : 13:27:38 2022年6月13日 

解析数据采集器1下位机环境参数程序出现异常:Timeout expired.  The timeout period elapsed prior to completion of the operation or the server is not responding.接收到的内容:55AA00012060323032323A30363A31333A31333A32383A32333A3030300000027A0000003CD119D5750100000000FFFFFFFF54452B33302E32323323

------------------------------------


Log Entry : 13:27:50 2022年6月13日 

处理舱内正常状态数据异常！Timeout expired.  The timeout period elapsed prior to completion of the operation or the server is not responding.

------------------------------------


Log Entry : 13:28:29 2022年6月13日 

定时生成存储文件出现异常！Timeout expired.  The timeout period elapsed prior to completion of the operation or the server is not responding.

------------------------------------


Log Entry : 13:28:29 2022年6月13日 

解析数据采集器1下位机环境参数程序出现异常:Timeout expired.  The timeout period elapsed prior to completion of the operation or the server is not responding.接收到的内容:55AA00012060323032323A30363A31333A31333A32393A30393A3030300000027C0000003CD119D5750100000000FFFFFFFF54452B33302E32333323

------------------------------------


Log Entry : 13:28:35 2022年6月13日 

处理舱内正常状态数据异常！Timeout expired.  The timeout period elapsed prior to completion of the operation or the server is not responding.

------------------------------------


Log Entry : 13:29:03 2022年6月13日 

给下位机发送指令异常！您的主机中的软件中止了一个已建立的连接。

------------------------------------


Log Entry : 13:29:08 2022年6月13日 

解析数据采集器1下位机环境参数程序出现异常:Timeout expired.  The timeout period elapsed prior to completion of the operation or the server is not responding.接收到的内容:55AA00012060323032323A30363A31333A31333A32393A35343A3030300000027E0000003CD119D5750100000000FFFFFFFF54452B33302E32343223

------------------------------------


Log Entry : 13:29:20 2022年6月13日 

处理舱内正常状态数据异常！Timeout expired.  The timeout period elapsed prior to completion of the operation or the server is not responding.

------------------------------------


Log Entry : 13:29:44 2022年6月13日 

定时生成存储文件出现异常！Timeout expired.  The timeout period elapsed prior to completion of the operation or the server is not responding.

------------------------------------


Log Entry : 13:30:00 2022年6月13日 

解析数据采集器1下位机环境参数程序出现异常:Timeout expired.  The timeout period elapsed prior to completion of the operation or the server is not responding.接收到的内容:55AA00012060323032323A30363A31333A31333A33303A33393A303030000002800000003CD119D5750100000000FFFFFFFF54452B33302E32353123

------------------------------------


Log Entry : 13:30:06 2022年6月13日 

处理舱内正常状态数据异常！Timeout expired.  The timeout period elapsed prior to completion of the operation or the server is not responding.

------------------------------------


Log Entry : 13:30:39 2022年6月13日 

解析数据采集器1下位机环境参数程序出现异常:Timeout expired.  The timeout period elapsed prior to completion of the operation or the server is not responding.接收到的内容:55AA00012060323032323A30363A31333A31333A33313A32343A303030000002820000003CD119D5750100000000FFFFFFFF54452B33302E32363023

------------------------------------


Log Entry : 13:30:51 2022年6月13日 

处理舱内正常状态数据异常！Timeout expired.  The timeout period elapsed prior to completion of the operation or the server is not responding.

------------------------------------


Log Entry : 13:30:59 2022年6月13日 

定时生成存储文件出现异常！Timeout expired.  The timeout period elapsed prior to completion of the operation or the server is not responding.

------------------------------------


Log Entry : 13:31:30 2022年6月13日 

解析数据采集器1下位机传感器数据程序出现异常:Timeout expired.  The timeout period elapsed prior to completion of the operation or the server is not responding.接收到的内容:55AA00010001323032323A30363A31333A31333A33323A30383A303030000001E100000040365C9A8B0100000000FFFFFFFF4E31244461746130382E31353B23

------------------------------------


Log Entry : 13:31:36 2022年6月13日 

处理舱内正常状态数据异常！Timeout expired.  The timeout period elapsed prior to completion of the operation or the server is not responding.

------------------------------------


Log Entry : 13:32:09 2022年6月13日 

解析数据采集器1下位机传感器数据程序出现异常:Timeout expired.  The timeout period elapsed prior to completion of the operation or the server is not responding.接收到的内容:55AA00010001323032323A30363A31333A31333A33323A34383A303030000001E300000040365C9A8B0100000000FFFFFFFF4E31244461746130382E31313B23

------------------------------------


Log Entry : 13:32:14 2022年6月13日 

定时生成存储文件出现异常！Timeout expired.  The timeout period elapsed prior to completion of the operation or the server is not responding.

------------------------------------


Log Entry : 13:32:22 2022年6月13日 

处理舱内正常状态数据异常！Timeout expired.  The timeout period elapsed prior to completion of the operation or the server is not responding.

------------------------------------


Log Entry : 13:33:00 2022年6月13日 

解析数据采集器1下位机传感器数据程序出现异常:Timeout expired.  The timeout period elapsed prior to completion of the operation or the server is not responding.接收到的内容:55AA00010001323032323A30363A31333A31333A33333A32383A303030000001E400000040365C9A8B0100000000FFFFFFFF4E31244461746130382E31323B23

------------------------------------


Log Entry : 13:33:07 2022年6月13日 

处理舱内正常状态数据异常！Timeout expired.  The timeout period elapsed prior to completion of the operation or the server is not responding.

------------------------------------


Log Entry : 13:33:29 2022年6月13日 

定时生成存储文件出现异常！Timeout expired.  The timeout period elapsed prior to completion of the operation or the server is not responding.

------------------------------------


Log Entry : 13:33:40 2022年6月13日 

解析数据采集器1下位机环境参数程序出现异常:Timeout expired.  The timeout period elapsed prior to completion of the operation or the server is not responding.接收到的内容:55AA00012060323032323A30363A31333A31333A33343A32353A3030300000028A0000003CD119D5750100000000FFFFFFFF54452B33302E32393723

------------------------------------


Log Entry : 13:33:53 2022年6月13日 

处理舱内正常状态数据异常！Timeout expired.  The timeout period elapsed prior to completion of the operation or the server is not responding.

------------------------------------


Log Entry : 13:34:31 2022年6月13日 

解析数据采集器1下位机环境参数程序出现异常:Timeout expired.  The timeout period elapsed prior to completion of the operation or the server is not responding.接收到的内容:55AA00012060323032323A30363A31333A31333A33353A31313A3030300000028C0000003CD119D5750100000000FFFFFFFF54452B33302E33303623

------------------------------------


Log Entry : 13:34:38 2022年6月13日 

处理舱内正常状态数据异常！Timeout expired.  The timeout period elapsed prior to completion of the operation or the server is not responding.

------------------------------------


Log Entry : 13:34:44 2022年6月13日 

定时生成存储文件出现异常！Timeout expired.  The timeout period elapsed prior to completion of the operation or the server is not responding.

------------------------------------


Log Entry : 13:35:11 2022年6月13日 

解析数据采集器1下位机环境参数程序出现异常:Timeout expired.  The timeout period elapsed prior to completion of the operation or the server is not responding.接收到的内容:55AA00012060323032323A30363A31333A31333A33353A35363A3030300000028E0000003CD119D5750100000000FFFFFFFF54452B33302E33313523

------------------------------------


Log Entry : 13:35:23 2022年6月13日 

处理舱内正常状态数据异常！Timeout expired.  The timeout period elapsed prior to completion of the operation or the server is not responding.

------------------------------------


Log Entry : 13:35:59 2022年6月13日 

定时生成存储文件出现异常！Timeout expired.  The timeout period elapsed prior to completion of the operation or the server is not responding.

------------------------------------


Log Entry : 13:36:02 2022年6月13日 

解析数据采集器1下位机环境参数程序出现异常:Timeout expired.  The timeout period elapsed prior to completion of the operation or the server is not responding.接收到的内容:55AA00012060323032323A30363A31333A31333A33363A34313A303030000002900000003CD119D5750100000000FFFFFFFF54452B33302E33323523

------------------------------------


Log Entry : 13:36:09 2022年6月13日 

处理舱内正常状态数据异常！Timeout expired.  The timeout period elapsed prior to completion of the operation or the server is not responding.

------------------------------------


Log Entry : 13:36:41 2022年6月13日 

解析数据采集器1下位机环境参数程序出现异常:Timeout expired.  The timeout period elapsed prior to completion of the operation or the server is not responding.接收到的内容:55AA00012060323032323A30363A31333A31333A33373A32363A303030000002920000003CD119D5750100000000FFFFFFFF54452B33302E33333423

------------------------------------


Log Entry : 13:36:54 2022年6月13日 

处理舱内正常状态数据异常！Timeout expired.  The timeout period elapsed prior to completion of the operation or the server is not responding.

------------------------------------


Log Entry : 13:37:14 2022年6月13日 

定时生成存储文件出现异常！Timeout expired.  The timeout period elapsed prior to completion of the operation or the server is not responding.

------------------------------------


Log Entry : 13:37:32 2022年6月13日 

解析数据采集器1下位机传感器数据程序出现异常:Timeout expired.  The timeout period elapsed prior to completion of the operation or the server is not responding.接收到的内容:55AA00010001323032323A30363A31333A31333A33383A31303A303030000001ED00000040365C9A8B0100000000FFFFFFFF4E31244461746130382E30353B23

------------------------------------


Log Entry : 13:37:39 2022年6月13日 

处理舱内正常状态数据异常！Timeout expired.  The timeout period elapsed prior to completion of the operation or the server is not responding.

------------------------------------


Log Entry : 13:38:11 2022年6月13日 

解析数据采集器1下位机传感器数据程序出现异常:Timeout expired.  The timeout period elapsed prior to completion of the operation or the server is not responding.接收到的内容:55AA00010001323032323A30363A31333A31333A33383A35303A303030000001EF00000040365C9A8B0100000000FFFFFFFF4E31244461746130382E31313B23

------------------------------------


Log Entry : 13:38:25 2022年6月13日 

处理舱内正常状态数据异常！Timeout expired.  The timeout period elapsed prior to completion of the operation or the server is not responding.

------------------------------------


Log Entry : 13:38:30 2022年6月13日 

定时生成存储文件出现异常！Timeout expired.  The timeout period elapsed prior to completion of the operation or the server is not responding.

------------------------------------


Log Entry : 13:39:02 2022年6月13日 

解析数据采集器1下位机传感器数据程序出现异常:Timeout expired.  The timeout period elapsed prior to completion of the operation or the server is not responding.接收到的内容:55AA00010001323032323A30363A31333A31333A33393A33303A303030000001F000000040365C9A8B0100000000FFFFFFFF4E31244461746130382E32303B23

------------------------------------


Log Entry : 13:39:04 2022年6月13日 

给下位机发送指令异常！您的主机中的软件中止了一个已建立的连接。

------------------------------------


Log Entry : 13:39:10 2022年6月13日 

处理舱内正常状态数据异常！Timeout expired.  The timeout period elapsed prior to completion of the operation or the server is not responding.

------------------------------------


Log Entry : 13:39:42 2022年6月13日 

解析数据采集器1下位机环境参数程序出现异常:Timeout expired.  The timeout period elapsed prior to completion of the operation or the server is not responding.接收到的内容:55AA00012060323032323A30363A31333A31333A34303A32373A3030300000029A0000003CD119D5750100000000FFFFFFFF54452B33302E33363723

------------------------------------


Log Entry : 13:39:45 2022年6月13日 

定时生成存储文件出现异常！Timeout expired.  The timeout period elapsed prior to completion of the operation or the server is not responding.

------------------------------------


Log Entry : 13:39:55 2022年6月13日 

处理舱内正常状态数据异常！Timeout expired.  The timeout period elapsed prior to completion of the operation or the server is not responding.

------------------------------------


Log Entry : 13:40:33 2022年6月13日 

解析数据采集器1下位机环境参数程序出现异常:Timeout expired.  The timeout period elapsed prior to completion of the operation or the server is not responding.接收到的内容:55AA00012060323032323A30363A31333A31333A34313A31333A3030300000029C0000003CD119D5750100000000FFFFFFFF54452B33302E33383023

------------------------------------


Log Entry : 13:40:41 2022年6月13日 

处理舱内正常状态数据异常！Timeout expired.  The timeout period elapsed prior to completion of the operation or the server is not responding.

------------------------------------


Log Entry : 13:41:00 2022年6月13日 

定时生成存储文件出现异常！Timeout expired.  The timeout period elapsed prior to completion of the operation or the server is not responding.

------------------------------------


Log Entry : 13:41:13 2022年6月13日 

解析数据采集器1下位机环境参数程序出现异常:Timeout expired.  The timeout period elapsed prior to completion of the operation or the server is not responding.接收到的内容:55AA00012060323032323A30363A31333A31333A34313A35383A3030300000029E0000003CD119D5750100000000FFFFFFFF54452B33302E33383423

------------------------------------


Log Entry : 13:41:26 2022年6月13日 

处理舱内正常状态数据异常！Timeout expired.  The timeout period elapsed prior to completion of the operation or the server is not responding.

------------------------------------


Log Entry : 13:42:04 2022年6月13日 

解析数据采集器1下位机环境参数程序出现异常:Timeout expired.  The timeout period elapsed prior to completion of the operation or the server is not responding.接收到的内容:55AA00012060323032323A30363A31333A31333A34323A34333A303030000002A00000003CD119D5750100000000FFFFFFFF54452B33302E33393423

------------------------------------


Log Entry : 13:42:12 2022年6月13日 

处理舱内正常状态数据异常！Timeout expired.  The timeout period elapsed prior to completion of the operation or the server is not responding.

------------------------------------


Log Entry : 13:42:15 2022年6月13日 

定时生成存储文件出现异常！Timeout expired.  The timeout period elapsed prior to completion of the operation or the server is not responding.

------------------------------------


Log Entry : 13:42:43 2022年6月13日 

解析数据采集器1下位机环境参数程序出现异常:Timeout expired.  The timeout period elapsed prior to completion of the operation or the server is not responding.接收到的内容:55AA00012060323032323A30363A31333A31333A34333A32383A303030000002A20000003CD119D5750100000000FFFFFFFF54452B33302E34303323

------------------------------------


Log Entry : 13:42:57 2022年6月13日 

处理舱内正常状态数据异常！Timeout expired.  The timeout period elapsed prior to completion of the operation or the server is not responding.

------------------------------------


Log Entry : 13:43:23 2022年6月13日 

解析数据采集器1下位机传感器数据程序出现异常:发生一个或多个错误。接收到的内容:55AA00010001323032323A30363A31333A31333A34343A31323A303030000001F900000040365C9A8B0100000000FFFFFFFF4E31244461746130372E39353B23

------------------------------------


Log Entry : 13:43:29 2022年6月13日 

处理舱内正常状态数据异常！发生一个或多个错误。

------------------------------------


Log Entry : 13:43:30 2022年6月13日 

定时生成存储文件出现异常！Timeout expired.  The timeout period elapsed prior to completion of the operation or the server is not responding.

------------------------------------


Log Entry : 13:49:05 2022年6月13日 

给下位机发送指令异常！您的主机中的软件中止了一个已建立的连接。

------------------------------------


Log Entry : 13:57:28 2022年6月13日 

解析数据采集器1下位机环境参数程序出现异常:Fatal error encountered during command execution.接收到的内容:55AA00012050323032323A30363A31333A31333A35373A34393A30303000000DE80000004331315E920100000000FFFFFFFF4E354330302E3039325632332E38343623

------------------------------------


Log Entry : 13:58:14 2022年6月13日 

解析数据采集器1下位机环境参数程序出现异常:Timeout expired.  The timeout period elapsed prior to completion of the operation or the server is not responding.接收到的内容:55AA00012030323032323A30363A31333A31333A35383A35363A30303000000DF500000043D852FBA70100000000FFFFFFFF4E334330302E3033305631312E39343123

------------------------------------


Log Entry : 13:59:06 2022年6月13日 

给下位机发送指令异常！您的主机中的软件中止了一个已建立的连接。

------------------------------------


Log Entry : 14:09:07 2022年6月13日 

给下位机发送指令异常！您的主机中的软件中止了一个已建立的连接。

------------------------------------


Log Entry : 14:19:08 2022年6月13日 

给下位机发送指令异常！您的主机中的软件中止了一个已建立的连接。

------------------------------------


Log Entry : 14:29:09 2022年6月13日 

给下位机发送指令异常！您的主机中的软件中止了一个已建立的连接。

------------------------------------


Log Entry : 14:37:51 2022年6月13日 

给下位机发送指令异常！您的主机中的软件中止了一个已建立的连接。

------------------------------------


Log Entry : 14:47:52 2022年6月13日 

给下位机发送指令异常！您的主机中的软件中止了一个已建立的连接。

------------------------------------


Log Entry : 14:52:13 2022年6月13日 

解析数据采集器1下位机环境参数程序出现异常:Fatal error encountered during command execution.接收到的内容:55AA00012040323032323A30363A31333A31343A35323A32393A303030000010B20000004346366E040100000000FFFFFFFF4E344330302E3030305631312E39353323

------------------------------------


Log Entry : 14:57:53 2022年6月13日 

给下位机发送指令异常！您的主机中的软件中止了一个已建立的连接。

------------------------------------


Log Entry : 15:07:54 2022年6月13日 

给下位机发送指令异常！您的主机中的软件中止了一个已建立的连接。

------------------------------------


Log Entry : 15:17:55 2022年6月13日 

给下位机发送指令异常！您的主机中的软件中止了一个已建立的连接。

------------------------------------


Log Entry : 15:27:56 2022年6月13日 

给下位机发送指令异常！您的主机中的软件中止了一个已建立的连接。

------------------------------------


Log Entry : 15:37:37 2022年6月13日 

解析数据采集器1下位机环境参数程序出现异常:Timeout expired.  The timeout period elapsed prior to completion of the operation or the server is not responding.接收到的内容:55AA00012040323032323A30363A31333A31353A33383A30373A3030300000130F0000004346366E040100000000FFFFFFFF4E344330302E3030305631312E39363523

------------------------------------


Log Entry : 15:37:37 2022年6月13日 

定时生成存储文件出现异常！Timeout expired.  The timeout period elapsed prior to completion of the operation or the server is not responding.

------------------------------------


Log Entry : 15:37:47 2022年6月13日 

处理舱内正常状态数据异常！Timeout expired.  The timeout period elapsed prior to completion of the operation or the server is not responding.

------------------------------------


Log Entry : 15:37:57 2022年6月13日 

给下位机发送指令异常！您的主机中的软件中止了一个已建立的连接。

------------------------------------


Log Entry : 15:38:27 2022年6月13日 

解析数据采集器1下位机传感器数据程序出现异常:Timeout expired.  The timeout period elapsed prior to completion of the operation or the server is not responding.接收到的内容:55AA00010001323032323A30363A31333A31353A33383A34393A303030000002DB00000040365C9A8B0100000000FFFFFFFF4E31244461746130382E30363B23

------------------------------------


Log Entry : 15:38:27 2022年6月13日 

处理舱内正常状态数据异常！Timeout expired.  The timeout period elapsed prior to completion of the operation or the server is not responding.

------------------------------------


Log Entry : 15:38:52 2022年6月13日 

定时生成存储文件出现异常！Timeout expired.  The timeout period elapsed prior to completion of the operation or the server is not responding.

------------------------------------


Log Entry : 15:47:58 2022年6月13日 

给下位机发送指令异常！您的主机中的软件中止了一个已建立的连接。

------------------------------------


Log Entry : 15:58:00 2022年6月13日 

给下位机发送指令异常！您的主机中的软件中止了一个已建立的连接。

------------------------------------


Log Entry : 16:08:01 2022年6月13日 

给下位机发送指令异常！您的主机中的软件中止了一个已建立的连接。

------------------------------------


Log Entry : 16:11:22 2022年6月13日 

解析数据采集器1下位机环境参数程序出现异常:发生一个或多个错误。接收到的内容:55AA00012060323032323A30363A31333A31363A31323A30343A3030300000042A0000003CD119D5750100000000FFFFFFFF54452B33312E33333723

------------------------------------


Log Entry : 16:18:02 2022年6月13日 

给下位机发送指令异常！您的主机中的软件中止了一个已建立的连接。

------------------------------------


Log Entry : 16:28:03 2022年6月13日 

给下位机发送指令异常！您的主机中的软件中止了一个已建立的连接。

------------------------------------


Log Entry : 16:32:00 2022年6月13日 

处理舱内正常状态数据异常！Reading from the stream has failed.

------------------------------------


Log Entry : 16:32:18 2022年6月13日 

解析数据采集器1下位机环境参数程序出现异常:Timeout expired.  The timeout period elapsed prior to completion of the operation or the server is not responding.接收到的内容:55AA00012060323032323A30363A31333A31363A33323A34393A303030000004610000003CD119D5750100000000FFFFFFFF54452B33312E34333323

------------------------------------


Log Entry : 16:33:01 2022年6月13日 

定时生成存储文件出现异常！Timeout expired.  The timeout period elapsed prior to completion of the operation or the server is not responding.

------------------------------------


Log Entry : 16:33:01 2022年6月13日 

处理舱内正常状态数据异常！Timeout expired.  The timeout period elapsed prior to completion of the operation or the server is not responding.

------------------------------------


Log Entry : 16:33:10 2022年6月13日 

解析数据采集器1下位机环境参数程序出现异常:Timeout expired.  The timeout period elapsed prior to completion of the operation or the server is not responding.接收到的内容:55AA00012060323032323A30363A31333A31363A33333A35363A303030000004640000003CD119D5750100000000FFFFFFFF54452B33312E34333323

------------------------------------


Log Entry : 16:33:41 2022年6月13日 

处理舱内正常状态数据异常！Timeout expired.  The timeout period elapsed prior to completion of the operation or the server is not responding.

------------------------------------


Log Entry : 16:33:56 2022年6月13日 

解析数据采集器1下位机环境参数程序出现异常:Timeout expired.  The timeout period elapsed prior to completion of the operation or the server is not responding.接收到的内容:55AA00012060323032323A30363A31333A31363A33343A34313A303030000004660000003CD119D5750100000000FFFFFFFF54452B33312E34333823

------------------------------------


Log Entry : 16:38:05 2022年6月13日 

给下位机发送指令异常！您的主机中的软件中止了一个已建立的连接。

------------------------------------


Log Entry : 14:12:57 2022年6月20日 

给下位机发送指令异常！您的主机中的软件中止了一个已建立的连接。

------------------------------------


Log Entry : 14:22:58 2022年6月20日 

给下位机发送指令异常！您的主机中的软件中止了一个已建立的连接。

------------------------------------
