# Supplementary material
Source: MDPI journal article supplement (https://www.mdpi.com/2077-1312/10/8/1051)
Supplement: s1 [file s1 › OSNSystem/OSNSystem/OSNSystem/bin/Debug/OSNSystem.vshost.exe.manifest]

<?xml version="1.0" encoding="utf-8"?>
<asmv1:assembly manifestVersion="1.0" xmlns="urn:schemas-microsoft-com:asm.v1" xmlns:asmv1="urn:schemas-microsoft-com:asm.v1" xmlns:asmv2="urn:schemas-microsoft-com:asm.v2" xmlns:xsi="http://www.w3.org/2001/XMLSchema-instance">
  <assemblyIdentity version="1.0.0.0" name="MyApplication.app" />
  <trustInfo xmlns="urn:schemas-microsoft-com:asm.v2">
    <security>
      <requestedPrivileges xmlns="urn:schemas-microsoft-com:asm.v3">
        <!-- UAC 清单选项
            如果要更改 Windows 用户帐户控制级别，请用以下节点之一替换 
            requestedExecutionLevel 节点。

        <requestedExecutionLevel  level="asInvoker" uiAccess="false" />
        <requestedExecutionLevel  level="requireAdministrator" uiAccess="false" />
        <requestedExecutionLevel  level="highestAvailable" uiAccess="false" />

            指定 requestedExecutionLevel 节点将会禁用文件和注册表虚拟化。
            如果要利用文件和注册表虚拟化实现向后 
            兼容性，则删除 requestedExecutionLevel 节点。
        -->
        <requestedExecutionLevel level="requireAdministrator" uiAccess="false" />
      </requestedPrivileges>
      <applicationRequestMinimum>
        <defaultAssemblyRequest permissionSetReference="Custom" />
        <PermissionSet class="System.Security.PermissionSet" version="1" ID="Custom" SameSite="site" Unrestricted="true" />
      </applicationRequestMinimum>
    </security>
  </trustInfo>
  <compatibility xmlns="urn:schemas-microsoft-com:compatibility.v1">
    <application>
      <!-- 此应用程序设计使用的所有 Windows 版本的列表。Windows 将会自动选择最兼容的环境。-->
      <!-- 如果应用程序设计使用 Windows 7，请取消注释以下 supportedOS 节点-->
      <!--<supportedOS Id="{35138b9a-5d96-4fbd-8e2d-a2440225f93a}"/>-->
    </application>
  </compatibility>
  <!-- 启用 Windows 公共控件和对话框的主题(Windows XP 和更高版本) -->
  <!-- <dependency>
    <dependentAssembly>
      <assemblyIdentity
          type="win32"
          name="Microsoft.Windows.Common-Controls"
          version="6.0.0.0"
          processorArchitecture="*"
          publicKeyToken="6595b64144ccf1df"
          language="*"
        />
    </dependentAssembly>
  </dependency>-->
</asmv1:assembly>
