# Supplementary material
Source: MDPI journal article supplement (https://www.mdpi.com/2077-1312/10/8/1051)
Supplement: s1 [file s1 › OSNSystem/OSNSystem/OSNSystem/bin/Debug/TeeChart.xml]

<?xml version="1.0"?>
<doc>
    <assembly>
        <name>TeeChart</name>
    </assembly>
    <members>
        <member name="F:Steema.TeeChart.Tools.ZoomAttributes.NoClickPostback">
            <summary>
            Do not postback clicks
            </summary>
        </member>
        <member name="T:Steema.TeeChart.Tools.ZoomTool">
             <summary>
             The Zoom Tool is provided to facilitate zoom on Chart images rendered to a WebForm.
             It supports the WebChart Component only.
             </summary>
             <remarks>To use the Zoom tool you need to include the following elements:
             <list type="bullet">
             <item>Add the ZoomTool to your Chart using the Chart Editor. It will generate clientside Javascript at runtime
             to support Chart zooming.</item>
             <item>Add the code-behind code to interpret the information sent by
             the clientside Javascript routines. That is normally added to the Page_Load method.</item>
             <item>The ZoomTool assumes that Chart data is the same between zoom calls.</item>
             </list>
             </remarks>
             <example>
             <code>private void Page_Load(object sender, System.EventArgs e)
             {
               /* ----- Chart routines here (see TeeChart examples) ----- */
               /* ---- or import saved Chart ---- */
            	  WebChart1.Chart.Import.Template.Load(tmpChart);
            
            	  //check if existing zoom state exists
            	  CheckZoom(WebChart2);
            	}
            	
            	private void CheckZoom(WebChart wChart)
            	{
            	  //each new call to the server is an independent call for the Chart
            	  //so non-Chart information must be saved. An Arraylist is used
            	  //here to read/save current Axis information to a session variable.
            	  
            	  ArrayList zoomedState=(ArrayList)Session[wChart.ClientID+"Zoomed"];
            	  zoomedState=((Steema.TeeChart.Tools.ZoomTool)wChart.Chart.Tools[0]).SetCurrentZoom(Request,
            	                                                                                 zoomedState);
            	  if (zoomedState==null)
            	    Session.Remove(wChart.ClientID+"Zoomed");
            	  else
            	    Session.Add(wChart.ClientID+"Zoomed",zoomedState);
            	}
             </code>
             </example>
        </member>
        <member name="T:Steema.TeeChart.Tools.Tool">
            <summary>
            Base Tool class.
            </summary>
        </member>
        <member name="T:Steema.TeeChart.Drawing.TeeBase">
            <summary>
            Non-visible class for Chart element common characteristics
            </summary>
        </member>
        <member name="M:Steema.TeeChart.Drawing.TeeBase.SetBooleanProperty(System.Boolean@,System.Boolean)">
            <summary>
            
            </summary>
            <param name="variable">Boolean variable to change.</param>
            <param name="value">New value.</param>
        </member>
        <member name="M:Steema.TeeChart.Drawing.TeeBase.Invalidate">
            <summary>
            Use Invalidate when the entire canvas needs to be repainted. 
            </summary>
        </member>
        <member name="P:Steema.TeeChart.Drawing.TeeBase.Chart">
            <summary>
            Chart associated with this object
            </summary>
        </member>
        <member name="P:Steema.TeeChart.Drawing.TeeBase.Tag">
            <summary>
            Gets or sets an object that provides additional data about the TChart object.
            </summary>
        </member>
        <member name="M:Steema.TeeChart.Tools.Tool.#ctor(System.ComponentModel.IContainer)">
            <summary>
            Required for Windows.Forms Class Composition Designer support
            </summary>
        </member>
        <member name="M:Steema.TeeChart.Tools.Tool.GetBitmapEditor">
            <summary>
            Returns the associated bitmap icon for a given Tool class.
            This icon is used at Tools gallery ListBox and Tools Editor dialog.
            </summary>
        </member>
        <member name="M:Steema.TeeChart.Tools.Tool.CreateNewTool(Steema.TeeChart.Chart,System.Type)">
            <summary>
            Creates a new Tool object and sets the Name and Chart properties.
            </summary>
        </member>
        <member name="M:Steema.TeeChart.Tools.Tool.NewFromType(System.Type)">
             <summary>
            Creates a new tool from the System.Type of an existing tools object. 
             </summary>
        </member>
        <member name="P:Steema.TeeChart.Tools.Tool.Active">
            <summary>
            Enables/Disables the indexed Tool.
            </summary>
        </member>
        <member name="M:Steema.TeeChart.Tools.ZoomTool.Zoom(System.Drawing.Rectangle)">
            <summary>
            Call this method to zoom the Chart.
            </summary>
            <param name="r">Pixel based bounds rectangle (left, top, width, height).</param>
            <remarks>
            Alternatively you may use standard Zoom methods to zoom directly but you need to generate
            an internal Chart first for all point pixel locations to be calculated.
            </remarks>
            <example><code>	WebChart1.Chart.Bitmap();
            	WebChart1.Chart.Zoom.ZoomRect(new Rect(x0,y0,x1-x0 /*width*/,y1-y0 /*height*/));
            </code>
            </example>
        </member>
        <member name="M:Steema.TeeChart.Tools.ZoomTool.SetSavedZoom(System.Collections.ArrayList)">
            <summary>
            If current Zoom state saved to session variable, preset current Chart zoomstate
            </summary>
            <param name="zoomedState">Arraylist, Saved Session state of Chart axes</param>
        </member>
        <member name="M:Steema.TeeChart.Tools.ZoomTool.SetCurrentZoom(System.Web.HttpRequest,System.Collections.ArrayList,System.Collections.Specialized.NameValueCollection)">
            <summary>
            Use method to set Zoom where there are post elements (eg. Button or DropDownList)
            on the page that might send a non-zoom page request.
            </summary>
            <example>From the WebForm call CheckZoom after loading Charts in Page_Load.
            <code>
            private void Page_Load(object sender, System.EventArgs e) 
            { 
            		MemoryStream tmpChart;
            
            		if (Session["ch1"]==null)
            	  {
            		  WebChart1.Chart[0].FillSampleValues();
            		  tmpChart=new MemoryStream();
            		  WebChart1.Chart.Export.Template.Save(tmpChart);
            		  //save template to a Session variable
            		  Session.Add("ch1",tmpChart);
            	  }
            	  else
            	  {
            	  	//retrieve the session stored Chart
            	  	tmpChart=(MemoryStream)Session["ch1"];
            	  	//set the Stream position to 0 as the last read/write
            	  	//will have moved the position to the end of the stream
            	  	tmpChart.Position=0;
            	  	//import saved Chart
            	  	WebChart1.Chart.Import.Template.Load(tmpChart);
            	  	CheckZoom(WebChart1);
            	  }
            }
            
            private void CheckZoom(WebChart wChart)
            {
            		ArrayList zoomedState=(ArrayList)Session[wChart.ClientID+"Zoomed"];
            		zoomedState=((Steema.TeeChart.Tools.ZoomTool)wChart.Chart.Tools[0]).SetCurrentZoom(Request,
            																																	zoomedState,DeterminePostBackMode());
            		if (zoomedState==null)
            		  Session.Remove(wChart.ClientID+"Zoomed");
            		else
            		  Session.Add(wChart.ClientID+"Zoomed",zoomedState);
            }
            </code></example>
        </member>
        <member name="M:Steema.TeeChart.Tools.ZoomTool.SetCurrentZoom(System.Web.HttpRequest,System.Collections.ArrayList)">
            <summary>
            Use method to set Zoom where there are no post elements on the
            page that might send a page request.
            </summary>
            <example>From the WebForm call CheckZoom after loading Charts in Page_Load.
            <code>
            private void CheckZoom(WebChart wChart)
            	{
            		ArrayList zoomedState=(ArrayList)Session[wChart.ClientID+"Zoomed"];
            		zoomedState=((Steema.TeeChart.Tools.ZoomTool)wChart.Chart.Tools[0]).SetCurrentZoom(Request,
            																																					zoomedState);
            		if (zoomedState==null)
            		  Session.Remove(wChart.ClientID+"Zoomed");
            		else
            		  Session.Add(wChart.ClientID+"Zoomed",zoomedState);
            	}
            </code></example>
        </member>
        <member name="P:Steema.TeeChart.Tools.ZoomTool.Description">
            <summary>
            Gets descriptive text.
            </summary>
        </member>
        <member name="P:Steema.TeeChart.Tools.ZoomTool.Summary">
            <summary>
            Gets detailed descriptive text.
            </summary>
        </member>
        <member name="P:Steema.TeeChart.Tools.ZoomTool.ZoomCanvasIndex">
            <summary>
            The relative z plane of the Zoom Rect Draw. On a WebForm with many items it may
            be necessary to situate the Zoom Canvas at a custom higher plane level for Rect 
            draw to be visible on top of the Charts.
            </summary>
        </member>
        <member name="P:Steema.TeeChart.Tools.ZoomTool.ZoomFillTransparency">
            <summary>
            0 to 100%. Set to 0 (default) to for zoom rectangle to be transparent
            </summary>
        </member>
        <member name="P:Steema.TeeChart.Tools.ZoomTool.ZoomPenColor">
            <summary>
            Sets the Pen Color for the Zoom Rctangle.
            </summary>
        </member>
        <member name="P:Steema.TeeChart.Tools.ZoomTool.CustomVariables">
            <summary>
            Use this property to add any custom variables to the Chart's new page calls.
            </summary>
        </member>
        <member name="P:Steema.TeeChart.Tools.ZoomTool.Attributes">
            <summary>
            Supporting attributes for ZoomTool rendering
            </summary>
        </member>
        <member name="T:Steema.TeeChart.Tools.ScrollBarSetPositionEventArgs">
            <summary>
            EventArgs to support ScrollBar OnScrolled Event
            </summary>
        </member>
        <member name="T:Steema.TeeChart.Tools.ScrollBarScrolledHandler">
            <summary>
            ScrollBar OnScrolled Event Handler
            </summary>
        </member>
        <member name="T:Steema.TeeChart.Tools.ScrollBarChangedSizeHandler">
            <summary>
            ScrollBar OnChangedSize Event Handler
            </summary>
        </member>
        <member name="T:Steema.TeeChart.Tools.ScrollBarSetPositionHandler">
            <summary>
            ScrollBar OnSetPosition Event Handler
            </summary>
        </member>
        <member name="F:Steema.TeeChart.Tools.ScrollBarDrawStyle.Always">
            <summary>
             
            </summary>
        </member>
        <member name="F:Steema.TeeChart.Tools.ScrollBarDrawStyle.WhenNeeded">
             <summary>
            
             </summary>
        </member>
        <member name="T:Steema.TeeChart.Tools.LegendScrollBar">
            <summary>
            Legend ScrollBar tool.
            </summary>
        </member>
        <member name="T:Steema.TeeChart.Tools.ScrollBar">
            <summary>
            ScrollBar tool.
            </summary>
        </member>
        <member name="M:Steema.TeeChart.Tools.ScrollBar.ScrollRectangle">
            <summary>
            Returns the rectangle that defines the boundaries of the scrollbar thumb.
            </summary>
        </member>
        <member name="M:Steema.TeeChart.Tools.ScrollBar.MainRectangle">
            <summary>
            Returns the rectangle that defines the boundaries of the scrollbar.
            </summary>
        </member>
        <member name="P:Steema.TeeChart.Tools.ScrollBar.Horizontal">
            <summary>
            True when the scrollbar is horizontal, False if it is vertical.
            </summary>
        </member>
        <member name="P:Steema.TeeChart.Tools.ScrollBar.Position">
             <summary>
             The value where the scrollbar thumb is positioned in respect the scrollbar virtual Size property.
            
             See also the <see cref="P:Steema.TeeChart.Tools.ScrollBar.Size"/> property.
             </summary>
        </member>
        <member name="P:Steema.TeeChart.Tools.ScrollBar.Size">
             <summary>
             The total scrollbar virtual Size magnitude.
            
             See also the <see cref="P:Steema.TeeChart.Tools.ScrollBar.Position"/> property.
             </summary>
        </member>
        <member name="P:Steema.TeeChart.Tools.ScrollBar.ThumbBrush">
            <summary>
            The brush used to fill the scrollbar thumb.
            </summary>
        </member>
        <member name="P:Steema.TeeChart.Tools.ScrollBar.Brush">
            <summary>
            Element Brush characteristics.
            </summary>
        </member>
        <member name="P:Steema.TeeChart.Tools.ScrollBar.Pen">
            <summary>
            Element Pen characteristics.
            </summary>
        </member>
        <member name="P:Steema.TeeChart.Tools.ScrollBar.ArrowBrush">
            <summary>
            The brush used to fill the up/left and down/right "arrows".
            </summary>
        </member>
        <member name="P:Steema.TeeChart.Tools.ScrollBar.Gradient">
            <summary>
            Gradient properties used to fill the main scrollbar rectangle.
            </summary>
        </member>
        <member name="P:Steema.TeeChart.Tools.ScrollBar.Bevel">
            <summary>
            Style for the scrollbar border.
            </summary>
        </member>
        <member name="P:Steema.TeeChart.Tools.ScrollBar.MinThumbSize">
            <summary>
            Number of pixels that define the minimum size (width or height) of the scrollbar thumb indicator.
            </summary>
        </member>
        <member name="P:Steema.TeeChart.Tools.ScrollBar.Description">
            <summary>
            Gets descriptive text.
            </summary>
        </member>
        <member name="P:Steema.TeeChart.Tools.ScrollBar.AutoRepeat">
            <summary>
            When True (the default), the scrollbar will repeat mouse clicks when leaving the mouse button pressed.
            </summary>
        </member>
        <member name="P:Steema.TeeChart.Tools.ScrollBar.DrawStyle">
             <summary>
             Defines when the scrollbar is displayed.
            
             Values are "Always" and "WhenNeeded".
             </summary>
        </member>
        <member name="P:Steema.TeeChart.Tools.ScrollBar.InitialDelay">
             <summary>
             The amount in milliseconds that the scrollbar will delay before starting the auto-repeat feature.
            
             See also the <see cref="P:Steema.TeeChart.Tools.ScrollBar.AutoRepeat"/> property.
             </summary>
        </member>
        <member name="P:Steema.TeeChart.Tools.LegendScrollBar.Summary">
            <summary>
            Gets detailed descriptive text.
            </summary>
        </member>
        <member name="P:Steema.TeeChart.Tools.DragMarkEventArgs.Index">
            <summary>
            The value index of the mark.
            </summary>
        </member>
        <member name="P:Steema.TeeChart.Tools.DragMarkEventArgs.Button">
            <summary>
            Gets which mouse button was pressed.
            </summary>
        </member>
        <member name="P:Steema.TeeChart.Tools.DragMarkEventArgs.Clicks">
            <summary>
            Gets the number of times the mouse button was pressed and released.
            </summary>
        </member>
        <member name="P:Steema.TeeChart.Tools.DragMarkEventArgs.Delta">
            <summary>
            Gets a signed count of the number of detents the mouse wheel has rotated. A detent is one notch of the mouse wheel.
            </summary>
        </member>
        <member name="P:Steema.TeeChart.Tools.DragMarkEventArgs.Location">
            <summary>
            Gets the location of the mouse during the generating mouse event.
            </summary>
        </member>
        <member name="P:Steema.TeeChart.Tools.DragMarkEventArgs.X">
            <summary>
            Gets the x-coordinate of the mouse during the generating mouse event.
            </summary>
        </member>
        <member name="P:Steema.TeeChart.Tools.DragMarkEventArgs.Y">
            <summary>
            Gets the x-coordinate of the mouse during the generating mouse event.
            </summary>
        </member>
        <member name="T:Steema.TeeChart.Tools.DragMarks">
            <summary>
            DragMarks Tool.
            </summary>
        </member>
        <member name="T:Steema.TeeChart.Tools.ToolSeries">
            <summary>
            Base abstract class for Tool components with a Series property.
            </summary>
        </member>
        <member name="P:Steema.TeeChart.Tools.ToolSeries.GetHorizAxis">
            <summary>
            Returns the associated Top or Bottom Chart Horizontal Axis.
            </summary>
        </member>
        <member name="P:Steema.TeeChart.Tools.ToolSeries.GetVertAxis">
            <summary>
            Returns the associated Left or Right Chart Vertical Axis.
            </summary>
        </member>
        <member name="P:Steema.TeeChart.Tools.ToolSeries.Series">
            <summary>
            Sets Series with which Tools are associated.
            </summary>
        </member>
        <member name="P:Steema.TeeChart.Tools.DragMarks.Description">
            <summary>
            Gets descriptive name.
            </summary>
        </member>
        <member name="P:Steema.TeeChart.Tools.DragMarks.Summary">
            <summary>
            Gets detailed descriptive text.
            </summary>
        </member>
        <member name="T:Steema.TeeChart.Tools.ClipSeries">
            <summary>
            Series clip tool.
            Clips area bounded by series vertical and horizontal axis.
            </summary>
        </member>
        <member name="P:Steema.TeeChart.Tools.ClipSeries.Description">
            <summary>
            Gets descriptive text.
            </summary>
        </member>
        <member name="P:Steema.TeeChart.Tools.ClipSeries.Summary">
            <summary>
            Gets detailed descriptive text.
            </summary>
        </member>
        <member name="T:Steema.TeeChart.Tools.AxisBreakStyle">
             <summary>
            Describes the possible values of the <see cref="!:AxisBreaks.Style"/> property. 
             </summary>
        </member>
        <member name="F:Steema.TeeChart.Tools.AxisBreakStyle.SmallZigZag">
             <summary>
            Draws the break as small Zig Zag. 
             </summary>
        </member>
        <member name="F:Steema.TeeChart.Tools.AxisBreakStyle.ZigZag">
             <summary>
            Draws the break as Zig Zag. 
             </summary>
        </member>
        <member name="F:Steema.TeeChart.Tools.AxisBreakStyle.Line">
             <summary>
            Draws the break as Line. 
             </summary>
        </member>
        <member name="F:Steema.TeeChart.Tools.AxisBreakStyle.None">
             <summary>
            Draws the break as Transparent. 
             </summary>
        </member>
        <member name="T:Steema.TeeChart.Tools.AxisBreak">
            <summary>
            Axis Breaks tool.
            </summary>
        </member>
        <member name="P:Steema.TeeChart.Tools.AxisBreak.EndValue">
            <summary>
            Sets the End value of the Axis break.
            </summary>
        </member>
        <member name="P:Steema.TeeChart.Tools.AxisBreak.StartValue">
            <summary>
            Sets the Start value of the Axis break.
            </summary>
        </member>
        <member name="P:Steema.TeeChart.Tools.AxisBreak.Enabled">
            <summary>
            Enables or disables the axis break.
            </summary>
        </member>
        <member name="P:Steema.TeeChart.Tools.AxisBreak.Style">
            <summary>
            Sets the style of the break.
            </summary>
        </member>
        <member name="T:Steema.TeeChart.Tools.AxisBreaks">
            <summary>
            Collection of <see cref="T:Steema.TeeChart.Tools.AxisBreak"/>
            </summary>
        </member>
        <member name="T:Steema.TeeChart.Tools.AxisBreaksTool">
            <summary>
            Axis Breaks tool.
            </summary>
        </member>
        <member name="T:Steema.TeeChart.Tools.ToolAxis">
            <summary>
            Base abstract class for Tool components with an Axis property.
            </summary>
        </member>
        <member name="P:Steema.TeeChart.Tools.ToolAxis.Pen">
            <summary>
            Element Pen characteristics.
            </summary>
        </member>
        <member name="P:Steema.TeeChart.Tools.ToolAxis.Axis">
            <summary>
            Sets the axis to which a Tool will belong.
            </summary>
        </member>
        <member name="P:Steema.TeeChart.Tools.AxisBreaksTool.ScaleAdjustment">
            <summary>
            Default 0.0000001. This variable avoids jump/flicker when scrolling across Break boundaries
            by moving scroll to 'just' outside of Break zone when traversing Axis Min or Max.
            Adjust if your Axis scale requires different sensitivity.
            </summary>
        </member>
        <member name="P:Steema.TeeChart.Tools.AxisBreaksTool.Breaks">
            <summary>
            List of breaks.
            </summary>
        </member>
        <member name="P:Steema.TeeChart.Tools.AxisBreaksTool.Description">
            <summary>
            Gets descriptive text.
            </summary>
        </member>
        <member name="P:Steema.TeeChart.Tools.AxisBreaksTool.Summary">
            <summary>
            Gets detailed descriptive text.
            </summary>
        </member>
        <member name="P:Steema.TeeChart.Tools.AxisBreaksTool.Brush">
            <summary>
            Element Brush characteristics.
            </summary>
        </member>
        <member name="P:Steema.TeeChart.Tools.AxisBreaksTool.Pen">
            <summary>
            Specifies the pen used to draw the gap outline.
            </summary>
        </member>
        <member name="T:Steema.TeeChart.Styles.KnobGauge">
            <summary>
            KnobGauge Series.
            </summary>
        </member>
        <member name="T:Steema.TeeChart.Styles.CircularGauge">
            <summary>
            CircularGauge Series.
            </summary>
        </member>
        <member name="T:Steema.TeeChart.Styles.Circular">
            <summary>
            Circled Series.
            </summary>
        </member>
        <member name="T:Steema.TeeChart.Styles.Series">
             <summary>
            The base class for all TeeChart Series styles. 
             </summary>
        </member>
        <member name="F:Steema.TeeChart.Styles.Series.AutoDepth">
             <summary>
            Constant field for internal use. 
             </summary>
        </member>
        <member name="F:Steema.TeeChart.Styles.Series.AutoZOrder">
             <summary>
            Constant field for internal use.  
             </summary>
        </member>
        <member name="F:Steema.TeeChart.Styles.Series.GetHorizAxis">
             <summary>
            Returns the horizontal axis associated with the series. 
             </summary>
        </member>
        <member name="F:Steema.TeeChart.Styles.Series.GetVertAxis">
             <summary>
            Returns the vertical axis associated with the series.  
             </summary>
        </member>
        <member name="F:Steema.TeeChart.Styles.Series.UseAxis">
            <summary>
            Returns True when the Series needs axes to display points.
            For example, Pie Series returns False (it does not need axes).
            </summary>
        </member>
        <member name="F:Steema.TeeChart.Styles.Series.HasZValues">
             <summary>
            Returns true if the series has ZValues. 
             </summary>
        </member>
        <member name="M:Steema.TeeChart.Styles.Series.#ctor(System.ComponentModel.IContainer)">
            <summary>
            Required for Windows.Forms Class Composition Designer support
            </summary>
        </member>
        <member name="M:Steema.TeeChart.Styles.Series.NewFromType(System.Type)">
             <summary>
            Creates a new series from the System.Type of an existing series object. 
             </summary>
        </member>
        <member name="M:Steema.TeeChart.Styles.Series.NewFromType(System.Type,System.Object[])">
             <summary>
            Creates a new series from the System.Type of an existing series object. 
             </summary>
        </member>
        <member name="M:Steema.TeeChart.Styles.Series.CreateNewSeries(Steema.TeeChart.Chart,System.Type,System.Type,System.Int32)">
            <summary>
            Creates a new Series object and sets the Name, Chart, Sub-Style and Function properties.
            </summary>
        </member>
        <member name="M:Steema.TeeChart.Styles.Series.CreateNewSeries(Steema.TeeChart.Chart,System.Type,System.Type,System.Int32,System.Object[])">
            <summary>
            Creates a new Series object and sets the Name, Chart, Sub-Style and Function properties.
            </summary>
        </member>
        <member name="M:Steema.TeeChart.Styles.Series.CreateNewSeries(Steema.TeeChart.Chart,System.Type,System.Type)">
            <summary>
            Creates a new Series object and sets the Name, Chart and Function properties.
            </summary>
        </member>
        <member name="M:Steema.TeeChart.Styles.Series.Assign(Steema.TeeChart.Styles.Series)">
            <summary>
            Copies all properties from one Series component to another.
            </summary>
        </member>
        <member name="M:Steema.TeeChart.Styles.Series.Assign(Steema.TeeChart.Styles.Series,Steema.TeeChart.Styles.Series)">
            <summary>
            Copies all properties from one Series component to another.
            </summary>
        </member>
        <member name="M:Steema.TeeChart.Styles.Series.ChangeType(Steema.TeeChart.Styles.Series@,System.Type)">
            <summary>
            Replaces ASeries object with a new Series object of another class.
            </summary>
        </member>
        <member name="M:Steema.TeeChart.Styles.Series.GetBitmapEditor">
            <summary>
            Returns the associated bitmap icon for a given Series class.
            This icon is used at ChartListBox and Series Editor dialog.
            </summary>
        </member>
        <member name="M:Steema.TeeChart.Styles.Series.GetYValueList(System.String)">
            <summary>
            Returns the value list that has the AListName parameter.
            </summary>
        </member>
        <member name="M:Steema.TeeChart.Styles.Series.Clone">
            <summary>
            Returns a new Series, copy of this original.
            </summary>
        </member>
        <member name="M:Steema.TeeChart.Styles.Series.AssignValues(Steema.TeeChart.Styles.Series)">
            <summary>
            Adds all Values from Source series.
            </summary>
        </member>
        <member name="M:Steema.TeeChart.Styles.Series.AssignValues(Steema.TeeChart.Styles.Series,Steema.TeeChart.Styles.Series)">
            <summary>
            Adds all Values from Source series.
            </summary>
        </member>
        <member name="M:Steema.TeeChart.Styles.Series.RefreshSeries">
            <summary>
            Recalculates all dependent Series points again.
            </summary>
        </member>
        <member name="M:Steema.TeeChart.Styles.Series.BeginUpdate">
            <summary>
            Recalculates the function just one time, when finished adding points.
            </summary>
        </member>
        <member name="M:Steema.TeeChart.Styles.Series.EndUpdate">
            <summary>
            Used with .BeginUpdate to recalculate the function just once 
            when finished adding points.
            </summary>
        </member>
        <member name="M:Steema.TeeChart.Styles.Series.ValuePointToScreenPoint(System.Double,System.Double)">
            <summary>
            Returns the corresponding Screen Point values of a Value position between Axis limits.
            </summary>
        </member>
        <member name="M:Steema.TeeChart.Styles.Series.ScreenPointToValuePoint(System.Int32,System.Int32)">
            <summary>
            Returns the corresponding Value PointDouble values of a Screen position between Axis limits.
            </summary>
        </member>
        <member name="M:Steema.TeeChart.Styles.Series.XScreenToValue(System.Int32)">
            <summary>
            Returns the corresponding X value of a Screen position between Axis limits.
            </summary>
        </member>
        <member name="M:Steema.TeeChart.Styles.Series.YScreenToValue(System.Int32)">
            <summary>
            Returns the corresponding Y value of a Screen position between Axis limits.
            </summary>
        </member>
        <member name="M:Steema.TeeChart.Styles.Series.MaxMarkWidth">
            <summary>
            Returns the length in pixels of the longest Mark text.
            </summary>
        </member>
        <member name="M:Steema.TeeChart.Styles.Series.GetMarkValue(System.Int32)">
            <summary>
            Returns corresponding Point value suitable for displaying at Series Marks.
            </summary>
        </member>
        <member name="M:Steema.TeeChart.Styles.Series.ValueMarkText(System.Int32)">
            <summary>
            Returns the string representation of a Index point used to draw the Mark.
            </summary>
        </member>
        <member name="M:Steema.TeeChart.Styles.Series.Repaint">
            <summary>
            Forces the Chart to Repaint.
            </summary>
        </member>
        <member name="M:Steema.TeeChart.Styles.Series.SameClass(Steema.TeeChart.Styles.Series)">
            <summary>
            Returns True when the tmpSeries parameter is of the same class.
            </summary>
        </member>
        <member name="M:Steema.TeeChart.Styles.Series.SortByLabels(Steema.TeeChart.Styles.ValueListOrder)">
            <summary>
            Sorts all points in the series using the Labels (texts) list.
            Note: non-mandatory values (X) are modified (they are not preserved).
            </summary>
        </member>
        <member name="M:Steema.TeeChart.Styles.Series.ColorRange(Steema.TeeChart.Styles.ValueList,System.Double,System.Double,System.Drawing.Color)">
            <summary>
            This method will change the Color of a specified range of points.
            </summary>
            <param name="AValueList">Valuelist from which the range is defined</param>
            <param name="FromValue">Beginning of the specified AValueList range</param>
            <param name="ToValue">End of the specified AValueList range</param>
            <param name="AColor">New Color for range of points</param>
        </member>
        <member name="M:Steema.TeeChart.Styles.Series.CalcPosValue(System.Double)">
            <summary>
            Returns "Value" parameter coordinate position in pixels.
            </summary>
        </member>
        <member name="M:Steema.TeeChart.Styles.Series.CalcXPos(System.Int32)">
            <summary>
            Returns the pixel Screen Horizontal coordinate of the ValueIndex Series value.
            </summary>
        </member>
        <member name="M:Steema.TeeChart.Styles.Series.CalcXPosValue(System.Double)">
            <summary>
            Returns the pixel Screen Horizontal coordinate of the specified Value.
            </summary>
        </member>
        <member name="M:Steema.TeeChart.Styles.Series.CalcYPos(System.Int32)">
            <summary>
            Returns the pixel Screen Vertical coordinate of the ValueIndex Series value.
            </summary>
        </member>
        <member name="M:Steema.TeeChart.Styles.Series.CalcYPosValue(System.Double)">
            <summary>
            Returns the pixel Screen Vertical coordinate of the specified Value.
            </summary>
        </member>
        <member name="M:Steema.TeeChart.Styles.Series.ValueColor(System.Int32)">
            <summary>
            Returns the colour of the index point.
            </summary>
        </member>
        <member name="M:Steema.TeeChart.Styles.Series.MoreSameZOrder">
            <summary>
            Returns true if there are more series that share the same Z order. For example Stacked Bars.
            </summary>
        </member>
        <member name="M:Steema.TeeChart.Styles.Series.DrawSeries">
             <summary>
            Draws the series to the Chart Canvas. 
             </summary>
        </member>
        <member name="M:Steema.TeeChart.Styles.Series.Add(System.Collections.IList)">
             <summary>
            Adds the collection of objects that implement the IList interface. 
             </summary>
        </member>
        <member name="M:Steema.TeeChart.Styles.Series.Add(System.Data.IDataReader)">
             <summary>
            Adds the data set that implements the IDataReader interface.  
             </summary>
        </member>
        <member name="M:Steema.TeeChart.Styles.Series.Add(System.Data.DataTable)">
             <summary>
            Adds the DataTable.
             </summary>
        </member>
        <member name="M:Steema.TeeChart.Styles.Series.Add(System.Data.DataView)">
             <summary>
            Adds the DataView. 
             </summary>
        </member>
        <member name="M:Steema.TeeChart.Styles.Series.CheckDataSource">
            <summary>
            Refreshes all Series point values, either from database Tables, Queries or Series points.
            </summary>
        </member>
        <member name="M:Steema.TeeChart.Styles.Series.SwapValueIndex(System.Int32,System.Int32)">
            <summary>
            Exchanges one point with another. Also the point color and point label.
            </summary>
            <param name="a">Index of first point to exchange.</param>
            <param name="b">Index of second point to exchange.</param>
        </member>
        <member name="M:Steema.TeeChart.Styles.Series.Add(System.DateTime,System.Nullable{System.Double})">
             <summary>
            Adds new point with specified DateTime x and Double y values.  
             </summary>
             <returns><see cref="T:Steema.TeeChart.Styles.ValueList"/> index of added point</returns>
        </member>
        <member name="M:Steema.TeeChart.Styles.Series.Add(System.DateTime,System.Double)">
             <summary>
            Adds new point with specified DateTime x and Double y values.  
             </summary>
             <returns><see cref="T:Steema.TeeChart.Styles.ValueList"/> index of added point</returns>
        </member>
        <member name="M:Steema.TeeChart.Styles.Series.Add(System.DateTime,System.DateTime)">
             <summary>
            Adds new point with specified DateTime x and DateTime y values. 
             </summary>
             <returns><see cref="T:Steema.TeeChart.Styles.ValueList"/> index of added point</returns>
        </member>
        <member name="M:Steema.TeeChart.Styles.Series.Add(System.DateTime,System.Nullable{System.Double},System.Drawing.Color)">
             <summary>
            Adds new point with specified DateTime x, Double y values and Color. 
             </summary>
             <returns><see cref="T:Steema.TeeChart.Styles.ValueList"/> index of added point</returns>
        </member>
        <member name="M:Steema.TeeChart.Styles.Series.Add(System.DateTime,System.Double,System.Drawing.Color)">
             <summary>
            Adds new point with specified DateTime x, Double y values and Color. 
             </summary>
             <returns><see cref="T:Steema.TeeChart.Styles.ValueList"/> index of added point</returns>
        </member>
        <member name="M:Steema.TeeChart.Styles.Series.Add(System.DateTime,System.Nullable{System.Double},System.String)">
             <summary>
            Adds new point with specified DateTime x, Double y values and Text.  
             </summary>
             <returns><see cref="T:Steema.TeeChart.Styles.ValueList"/> index of added point</returns>
        </member>
        <member name="M:Steema.TeeChart.Styles.Series.Add(System.DateTime,System.Double,System.String)">
             <summary>
            Adds new point with specified DateTime x, Double y values and Text.  
             </summary>
             <returns><see cref="T:Steema.TeeChart.Styles.ValueList"/> index of added point</returns>
        </member>
        <member name="M:Steema.TeeChart.Styles.Series.AddNullXY(System.Double,System.Double)">
             <summary>
            System.Obsolete: Please use Add(x,y,Color.Transparent) method. 
             </summary>
        </member>
        <member name="M:Steema.TeeChart.Styles.Series.AddNull">
             <summary>
            System.Obsolete: Please use Add() method without parameters. 
             </summary>
        </member>
        <member name="M:Steema.TeeChart.Styles.Series.Add">
            <summary>
            Adds a new null (transparent) point.
            </summary>
        </member>
        <member name="M:Steema.TeeChart.Styles.Series.Add(System.Nullable{System.Int32})">
            <summary>
            Adds a new point with specified value.
            </summary>
        </member>
        <member name="M:Steema.TeeChart.Styles.Series.Add(System.Int32)">
            <summary>
            Adds a new point with specified value.
            </summary>
        </member>
        <member name="M:Steema.TeeChart.Styles.Series.Add(System.Nullable{System.Double})">
            <summary>
            Adds a new point with specified value.
            </summary>
        </member>
        <member name="M:Steema.TeeChart.Styles.Series.Add(System.Double)">
            <summary>
            Adds a new point with specified value.
            </summary>
        </member>
        <member name="M:Steema.TeeChart.Styles.Series.Add(System.Nullable{System.Int64})">
            <summary>
            Adds a new point with specified value.
            </summary>
        </member>
        <member name="M:Steema.TeeChart.Styles.Series.Add(System.Int64)">
            <summary>
            Adds a new point with specified value.
            </summary>
        </member>
        <member name="M:Steema.TeeChart.Styles.Series.Add(System.Nullable{System.Int64}[])">
            <summary>
            Adds the array of long values.
            </summary>
        </member>
        <member name="M:Steema.TeeChart.Styles.Series.Add(System.Int64[])">
            <summary>
            Adds the array of long values.
            </summary>
        </member>
        <member name="M:Steema.TeeChart.Styles.Series.Add(System.Nullable{System.Single})">
            <summary>
            Adds a new point with specified value.
            </summary>
        </member>
        <member name="M:Steema.TeeChart.Styles.Series.Add(System.Single)">
            <summary>
            Adds a new point with specified value.
            </summary>
        </member>
        <member name="M:Steema.TeeChart.Styles.Series.Add(System.Nullable{System.Double},System.String)">
            <summary>
            Adds a new point with specified value and text.
            </summary>
        </member>
        <member name="M:Steema.TeeChart.Styles.Series.Add(System.Double,System.String)">
            <summary>
            Adds a new point with specified value and text.
            </summary>
        </member>
        <member name="M:Steema.TeeChart.Styles.Series.Add(System.Nullable{System.Double},System.Nullable{System.Double})">
            <summary>
            Adds a new point with specified x and y values.
            </summary>
        </member>
        <member name="M:Steema.TeeChart.Styles.Series.Add(System.Double,System.Double)">
            <summary>
            Adds a new point with specified x and y values.
            </summary>
        </member>
        <member name="M:Steema.TeeChart.Styles.Series.Add(System.Drawing.PointF)">
             <summary>
            Adds the pair of floating point x- and y-pixel coordinates  
             </summary>
             <returns><see cref="T:Steema.TeeChart.Styles.ValueList"/> index of added point</returns>
        </member>
        <member name="M:Steema.TeeChart.Styles.Series.Add(System.Nullable{System.Double},System.Nullable{System.Double},System.String)">
            <summary>
            Adds a new point with specified x,y values and text.
            </summary>
        </member>
        <member name="M:Steema.TeeChart.Styles.Series.Add(System.Double,System.Double,System.String)">
            <summary>
            Adds a new point with specified x,y values and text.
            </summary>
        </member>
        <member name="M:Steema.TeeChart.Styles.Series.Add(System.Nullable{System.Double},System.Nullable{System.Double},System.String,System.Drawing.Color)">
            <summary>
            Adds a new point with specified x,y values, text and color.
            </summary>
        </member>
        <member name="M:Steema.TeeChart.Styles.Series.Add(System.Double,System.Double,System.String,System.Drawing.Color)">
            <summary>
            Adds a new point with specified x,y values, text and color.
            </summary>
        </member>
        <member name="M:Steema.TeeChart.Styles.Series.Add(System.DateTime,System.Nullable{System.Double},System.String,System.Drawing.Color)">
            <summary>
            Adds a new Datetime point to a Series, label and color.
            </summary>
            <param name="aDate">Datetime value</param>
            <param name="y">Y value</param>
            <param name="text">Point text</param>
            <param name="color">Point color</param>
            <returns>index of added point</returns>
        </member>
        <member name="M:Steema.TeeChart.Styles.Series.Add(System.DateTime,System.Double,System.String,System.Drawing.Color)">
            <summary>
            Adds a new Datetime point to a Series, label and color.
            </summary>
            <param name="aDate">Datetime value</param>
            <param name="y">Y value</param>
            <param name="text">Point text</param>
            <param name="color">Point color</param>
            <returns>index of added point</returns>
        </member>
        <member name="M:Steema.TeeChart.Styles.Series.Add(System.Nullable{System.Double},System.Nullable{System.Double},System.Drawing.Color)">
            <summary>
            Adds a new point with specified x and y values and color.
            </summary>
        </member>
        <member name="M:Steema.TeeChart.Styles.Series.Add(System.Double,System.Double,System.Drawing.Color)">
            <summary>
            Adds a new point with specified x and y values and color.
            </summary>
        </member>
        <member name="M:Steema.TeeChart.Styles.Series.Add(System.Nullable{System.Double},System.String,System.Drawing.Color)">
            <summary>
            Adds a new point with specified value, text and color.
            </summary>
        </member>
        <member name="M:Steema.TeeChart.Styles.Series.Add(System.Double,System.String,System.Drawing.Color)">
            <summary>
            Adds a new point with specified value, text and color.
            </summary>
        </member>
        <member name="M:Steema.TeeChart.Styles.Series.Add(System.Nullable{System.Double},System.Drawing.Color)">
            <summary>
            Adds a new point with specified value and color.
            </summary>
        </member>
        <member name="M:Steema.TeeChart.Styles.Series.Add(System.Double,System.Drawing.Color)">
            <summary>
            Adds a new point with specified value and color.
            </summary>
        </member>
        <member name="M:Steema.TeeChart.Styles.Series.Add(System.String)">
            <summary>
            Adds a new null point with specified text.
            </summary>
        </member>
        <member name="M:Steema.TeeChart.Styles.Series.Add(Steema.TeeChart.Styles.Series)">
            <summary>
            Adds all points in source Series.
            </summary>
        </member>
        <member name="M:Steema.TeeChart.Styles.Series.Add``1(``0)">
            <summary>
            Adds generic type T.
            </summary>
        </member>
        <member name="M:Steema.TeeChart.Styles.Series.Add(System.Array,System.Array,System.Boolean)">
            <summary>
            Adds the X and Y arrays, optionally appending the values to any existing ones.
            </summary>
        </member>
        <member name="M:Steema.TeeChart.Styles.Series.Add(System.Array,System.Array)">
            <summary>
            Adds the X and Y arrays.
            </summary>
        </member>
        <member name="M:Steema.TeeChart.Styles.Series.Add(System.Nullable{System.Double}[])">
            <summary>
            Adds the array of double values.
            </summary>
        </member>
        <member name="M:Steema.TeeChart.Styles.Series.Add(System.Double[])">
            <summary>
            Adds the array of double values.
            </summary>
        </member>
        <member name="M:Steema.TeeChart.Styles.Series.Add(System.Nullable{System.Single}[])">
            <summary>
            Adds the array of float values.
            </summary>
        </member>
        <member name="M:Steema.TeeChart.Styles.Series.Add(System.Single[])">
            <summary>
            Adds the array of float values.
            </summary>
        </member>
        <member name="M:Steema.TeeChart.Styles.Series.Add(System.Nullable{System.Int32}[])">
            <summary>
            Adds the array of integer values.
            </summary>
        </member>
        <member name="M:Steema.TeeChart.Styles.Series.Add(System.Int32[])">
            <summary>
            Adds the array of integer values.
            </summary>
        </member>
        <member name="M:Steema.TeeChart.Styles.Series.CheckOrder">
            <summary>
            Reorders points according to Order property of X,Y,etc value lists.
            </summary>
        </member>
        <member name="M:Steema.TeeChart.Styles.Series.Clear">
            <summary>
            Removes all points, texts and Colors from the Series.
            </summary>
        </member>
        <member name="M:Steema.TeeChart.Styles.Series.Clicked(System.Int32,System.Int32)">
            <summary>
            Returns the ValueIndex of the "clicked" point in the Series.
            </summary>
        </member>
        <member name="M:Steema.TeeChart.Styles.Series.Delete(System.Int32)">
            <summary>
            Removes the index th point.
            X values remain unchanged.
            </summary>
        </member>
        <member name="M:Steema.TeeChart.Styles.Series.Delete(System.Int32,System.Int32,System.Boolean)">
            <summary>
            Removes count number of points starting at index.
            When RemoveGap parameter is true, it calls ValueList FillSequence.
            </summary>
        </member>
        <member name="M:Steema.TeeChart.Styles.Series.FillSampleValues">
            <summary>
            Adds random values to help visualize the Series.
            Each series class determines how many random points to add.
            </summary>
        </member>
        <member name="M:Steema.TeeChart.Styles.Series.FillSampleValues(System.Int32)">
            <summary>
            Adds the specified NumValues random points.
            </summary>
            <param name="numValues">The number of sample values to add.</param>
        </member>
        <member name="M:Steema.TeeChart.Styles.Series.IsNull(System.Int32)">
            <summary>
            Returns true if the index th point in the Series is "null" or "empty".
            A point is considered "null" when the color of that point is "Transparent".
            </summary>
            <param name="index">The point index.</param>
            <returns>True if the point color is Color.Transparent.</returns>
        </member>
        <member name="M:Steema.TeeChart.Styles.Series.IsValidSourceOf(Steema.TeeChart.Styles.Series)">
            <summary>
            Validates Series datasource.
            </summary>
            <param name="value">The series to validate.</param>
            <returns>True if value can be a Series data source.</returns>
        </member>
        <member name="M:Steema.TeeChart.Styles.Series.FirstDisplayedIndex">
            <summary>
            Returns the index of the series point that is displayed first when the series is drawn.
            </summary>
        </member>
        <member name="M:Steema.TeeChart.Styles.Series.LastDisplayedIndex">
            <summary>
            Returns the index of the series point that is displayed first when the series is drawn.
            </summary>
        </member>
        <member name="M:Steema.TeeChart.Styles.Series.DrawValuesForward">
            <summary>
            Returns whether Series draws its points in ascending/descending order.
            </summary>
            <returns>True if values in this series are displayed forward, from 0 to Count-1.</returns>
        </member>
        <member name="M:Steema.TeeChart.Styles.Series.DrawValue(System.Int32)">
            <summary>
            Called internally. Draws the "ValueIndex" point of the Series.
            </summary>
        </member>
        <member name="M:Steema.TeeChart.Styles.Series.SetNull(System.Int32)">
             <summary>
            Sets the specified series point to a null (transparent) point. 
             </summary>
        </member>
        <member name="M:Steema.TeeChart.Styles.Series.SetNull(System.Int32,System.Boolean)">
            <summary>
            Toogles between null (transparent) and regular point.
            </summary>
            <param name="valueIndex">Point index</param>
            <param name="isNull">If true, transform to null point, otherwise transform to normal point.</param>
        </member>
        <member name="M:Steema.TeeChart.Styles.Series.SetSubGallery(System.Int32)">
            <summary>
            Creates and prepares the index'th Series style to show at sub-gallery dialog.
            </summary>
        </member>
        <member name="M:Steema.TeeChart.Styles.Series.CalcXSizeValue(System.Double)">
            <summary>
            Returns the size in pixels corresponding to value parameter in horizontal axis scales.
            </summary>
        </member>
        <member name="M:Steema.TeeChart.Styles.Series.CalcYSizeValue(System.Double)">
            <summary>
            Returns the size in pixels corresponding to value parameter in vertical axis scales.
            </summary>
        </member>
        <member name="M:Steema.TeeChart.Styles.Series.ToString">
             <summary>
            Overridden ToString() method. 
             </summary>
             <returns>Returns the Series <see cref="P:Steema.TeeChart.Styles.Series.Title"/> property.</returns>
        </member>
        <member name="M:Steema.TeeChart.Styles.Series.TitleOrName">
             <summary>
            System.Obsolete: Please use ToString() method.
             </summary>
        </member>
        <member name="M:Steema.TeeChart.Styles.Series.LegendString(System.Int32,Steema.TeeChart.LegendTextStyles)">
            <summary>
            Returns the formatted string corresponding to the LegendIndex point.
            </summary>
        </member>
        <member name="M:Steema.TeeChart.Styles.Series.MaxXValue">
            <summary>
            Returns the Maximum Value of the Series X Values List.
            </summary>
        </member>
        <member name="M:Steema.TeeChart.Styles.Series.MaxYValue">
            <summary>
            Returns the Maximum Value of the Series Y Values List.
            </summary>
        </member>
        <member name="M:Steema.TeeChart.Styles.Series.MinXValue">
            <summary>
            Returns the Minimum Value of the Series X Values List.
            </summary>
        </member>
        <member name="M:Steema.TeeChart.Styles.Series.MinYValue">
            <summary>
            Returns the Minimum Value of the Series Y Values List.
            </summary>
        </member>
        <member name="M:Steema.TeeChart.Styles.Series.MaxZValue">
            <summary>
            Returns Maximum Z Value.
            </summary>
        </member>
        <member name="M:Steema.TeeChart.Styles.Series.MinZValue">
            <summary>
            Returns Minimum Z Value.
            </summary>
        </member>
        <member name="E:Steema.TeeChart.Styles.Series.AfterDrawValues">
             <summary>
            Called just after drawing all series points, and before drawing other series that are in front. 
             </summary>
        </member>
        <member name="E:Steema.TeeChart.Styles.Series.BeforeDrawValues">
             <summary>
            Called just before drawing all series points, and after drawing other series that are behind. 
             </summary>
        </member>
        <member name="E:Steema.TeeChart.Styles.Series.GetSeriesMark">
             <summary>
            Triggered on placing Mark for each Series Point. Use this method to modify the Mark Text content.  
             </summary>
        </member>
        <member name="E:Steema.TeeChart.Styles.Series.MouseEnter">
             <summary>
            Occurs when the mouse pointer enters the control.
             </summary>
        </member>
        <member name="E:Steema.TeeChart.Styles.Series.MouseLeave">
             <summary>
            Occurs when the mouse pointer leaves the control. 
             </summary>
        </member>
        <member name="P:Steema.TeeChart.Styles.Series.Colors">
            <summary>
            Access to the stored Color Array, if created, for the Series.
            </summary>
        </member>
        <member name="P:Steema.TeeChart.Styles.Series.Item(System.Int32)">
            <summary>
            Point characteristics
            </summary>
        </member>
        <member name="P:Steema.TeeChart.Styles.Series.XValues">
            <summary>
            Values defining horizontal point positions.
            </summary>
        </member>
        <member name="P:Steema.TeeChart.Styles.Series.YValues">
            <summary>
            Values defining vertical point positions.
            </summary>
        </member>
        <member name="P:Steema.TeeChart.Styles.Series.ValuesLists">
             <summary>
            Returns the <see cref="!:Steema.TeeChart.Styles.ValuesLists"/> object of the series.
             </summary>
        </member>
        <member name="P:Steema.TeeChart.Styles.Series.CustomHorizAxis">
             <summary>
            Specified the custom horizontal axis for the series. 
             </summary>
        </member>
        <member name="P:Steema.TeeChart.Styles.Series.CustomVertAxis">
             <summary>
            Specified the custom vertical axis for the series.  
             </summary>
        </member>
        <member name="P:Steema.TeeChart.Styles.Series.Labels">
             <summary>
            Accesses a list of series point labels. 
             </summary>
        </member>
        <member name="P:Steema.TeeChart.Styles.Series.LabelMember">
            <summary>
            Gets or sets the Datasource Label Field
            </summary>
        </member>
        <member name="P:Steema.TeeChart.Styles.Series.ColorMember">
            <summary>
            Gets or sets the Datasource Color Field
            </summary>
        </member>
        <member name="E:Steema.TeeChart.Styles.Series.Click">
             <summary>
            Occurs when the control is clicked. 
             </summary>
        </member>
        <member name="E:Steema.TeeChart.Styles.Series.DblClick">
             <summary>
            Occurs when the control is double-clicked. 
             </summary>
        </member>
        <member name="P:Steema.TeeChart.Styles.Series.ColorEach">
            <summary>
            Draws points with different preset Colors.
            </summary>
        </member>
        <member name="P:Steema.TeeChart.Styles.Series.NumGallerySeries">
             <summary>
            For internal use. 
             </summary>
        </member>
        <member name="P:Steema.TeeChart.Styles.Series.Description">
            <summary>
            Gets descriptive text.
            </summary>
        </member>
        <member name="P:Steema.TeeChart.Styles.Series.Visible">
             <summary>
            Shows or hides this series. 
             </summary>
        </member>
        <member name="P:Steema.TeeChart.Styles.Series.StartZ">
             <summary>
            For internal use. 
             </summary>
        </member>
        <member name="P:Steema.TeeChart.Styles.Series.MiddleZ">
             <summary>
            For internal use.  
             </summary>
        </member>
        <member name="P:Steema.TeeChart.Styles.Series.EndZ">
             <summary>
            For internal use.  
             </summary>
        </member>
        <member name="P:Steema.TeeChart.Styles.Series.DateTimeFormat">
            <summary>
            Determines the DateTimeFormat to display point values.
            </summary>
        </member>
        <member name="P:Steema.TeeChart.Styles.Series.ValueFormat">
            <summary>
            Determines the Format to display point values.
            </summary>
        </member>
        <member name="P:Steema.TeeChart.Styles.Series.PercentFormat">
            <summary>
            Sets the Format to display point values as percentage.
            </summary>
        </member>
        <member name="P:Steema.TeeChart.Styles.Series.HorizAxis">
            <summary>
            Horizontal axis to associate to this Series.
            </summary>
        </member>
        <member name="P:Steema.TeeChart.Styles.Series.VertAxis">
            <summary>
            Determines Vertical axis associated to this Series.
            </summary>
        </member>
        <member name="P:Steema.TeeChart.Styles.Series.SeriesColor">
             <summary>
            System.Obsolete: Use the Series <see cref="P:Steema.TeeChart.Styles.Series.Color"/> property. 
             </summary>
        </member>
        <member name="P:Steema.TeeChart.Styles.Series.DataSource">
            <summary>
            Object to load data from.
            </summary>
        </member>
        <member name="P:Steema.TeeChart.Styles.Series.Color">
            <summary>
            Default color for all points.
            </summary>
        </member>
        <member name="P:Steema.TeeChart.Styles.Series.Active">
            <summary>
            Shows or hides this series.
            </summary>
        </member>
        <member name="P:Steema.TeeChart.Styles.Series.Title">
            <summary>
            Series description to show in Legend and editors.
            </summary>
        </member>
        <member name="P:Steema.TeeChart.Styles.Series.Count">
            <summary>
            Returns the number of points in the Series.
            </summary>
        </member>
        <member name="P:Steema.TeeChart.Styles.Series.Function">
            <summary>
            Function object to calculate values.
            </summary>
        </member>
        <member name="P:Steema.TeeChart.Styles.Series.ColorEachPoint">
             <summary>
            System.Obsolete: Please use ColorEach property. 
             </summary>
        </member>
        <member name="P:Steema.TeeChart.Styles.Series.Depth">
            <summary>
            Sets the Depth of the series points or interconnecting lines.
            </summary>
        </member>
        <member name="P:Steema.TeeChart.Styles.Series.ZOrder">
            <summary>
            Determines where on the depth axis the Series is drawn.
            </summary>
        </member>
        <member name="P:Steema.TeeChart.Styles.Series.ShowInLegend">
            <summary>
            Displays this Series Title in Legend.
            </summary>
        </member>
        <member name="P:Steema.TeeChart.Styles.Series.DefaultNullValue">
            <summary>
            Sets or returns the value to be used as a null value within the series.
            </summary>
        </member>
        <member name="P:Steema.TeeChart.Styles.Series.FirstVisibleIndex">
            <summary>
            Returns the index of the Series' first visible point.
            </summary>
        </member>
        <member name="P:Steema.TeeChart.Styles.Series.LastVisibleIndex">
            <summary>
            Returns the index of the Series' last visible point.
            </summary>
        </member>
        <member name="P:Steema.TeeChart.Styles.Series.Cursor">
            <summary>
            Cursor displayed when mouse is over a series point.
            </summary>
        </member>
        <member name="P:Steema.TeeChart.Styles.Series.Marks">
            <summary>
            Defines all necessary properties to draw a mark near to each Series point.
            </summary>
        </member>
        <member name="T:Steema.TeeChart.Styles.Series.GetSeriesMarkEventHandler">
             <summary>
            The Delegate for the <see cref="E:Steema.TeeChart.Styles.Series.GetSeriesMark"/> event. 
             </summary>
        </member>
        <member name="T:Steema.TeeChart.Styles.Series.SeriesRandom">
             <summary>
            Used internally to add random values to a series. 
             </summary>
        </member>
        <member name="F:Steema.TeeChart.Styles.Circular.PiDegree">
             <summary>
            Represents the constant pi / 180.
             </summary>
        </member>
        <member name="M:Steema.TeeChart.Styles.Circular.AngleToPos(System.Double,System.Double,System.Double,System.Int32@,System.Int32@)">
            <summary>
            Returns the exact Screen position for a given pair of Angle and Radius values.
            </summary>
        </member>
        <member name="M:Steema.TeeChart.Styles.Circular.PointToAngle(System.Int32,System.Int32)">
            <summary>
            Returns the angle from the XY point parameter to the circle center.
            </summary>
        </member>
        <member name="M:Steema.TeeChart.Styles.Circular.PointToRadius(System.Int32,System.Int32)">
            <summary>
            Returns the radius from XY point to the circle center.
            </summary>
        </member>
        <member name="M:Steema.TeeChart.Styles.Circular.Rotate(System.Int32)">
            <summary>
            Returns the angle by which the Chart is rotated.
            </summary>
        </member>
        <member name="P:Steema.TeeChart.Styles.Circular.RotationAngle">
            <summary>
            Sets angle of Chart rotation.
            </summary>
        </member>
        <member name="P:Steema.TeeChart.Styles.Circular.XRadius">
            <summary>
            Returns the exact horizontal size of the ellipse's radius in pixels. 
            </summary>
        </member>
        <member name="P:Steema.TeeChart.Styles.Circular.YRadius">
            <summary>
            Returns the exact vertical size of the ellipse's radius in pixels. 
            </summary>
        </member>
        <member name="P:Steema.TeeChart.Styles.Circular.CircleXCenter">
            <summary>
            Returns the exact horizontal position of ellipse's center in pixels. 
            </summary>
        </member>
        <member name="P:Steema.TeeChart.Styles.Circular.CircleYCenter">
            <summary>
            Returns the exact vertical position of the ellipse's center in pixels. 
            </summary>
        </member>
        <member name="P:Steema.TeeChart.Styles.Circular.CircleWidth">
            <summary>
            Returns the width of the bounding Circle.
            </summary>
        </member>
        <member name="P:Steema.TeeChart.Styles.Circular.CircleHeight">
            <summary>
            Returns the height of the bounding Circle.
            </summary>
        </member>
        <member name="P:Steema.TeeChart.Styles.Circular.CircleRect">
             <summary>
            Returns the rectangle that bounds the circle. 
             </summary>
        </member>
        <member name="P:Steema.TeeChart.Styles.Circular.CircleBackColor">
            <summary>
            Determines the color to fill the ellipse.
            </summary>
        </member>
        <member name="P:Steema.TeeChart.Styles.Circular.CircleGradient">
            <summary>
            Determines the Gradient which fills the ellipse.
            </summary>
        </member>
        <member name="P:Steema.TeeChart.Styles.Circular.Circled">
            <summary>
            Sets CirleSeries  as elliptical or circular.
            </summary>
        </member>
        <member name="P:Steema.TeeChart.Styles.Circular.CustomXRadius">
            <summary>
            Sets ellipse's horizontal radius in pixels.
            </summary>
        </member>
        <member name="P:Steema.TeeChart.Styles.Circular.CustomYRadius">
            <summary>
            Sets ellipse's vertical radius in pixels.
            </summary>
        </member>
        <member name="E:Steema.TeeChart.Styles.CircularGauge.ValueChanged">
            <summary>
             Called when the Gauge <see cref="P:Steema.TeeChart.Styles.CircularGauge.Value"/> property is changed.
            </summary>
        </member>
        <member name="P:Steema.TeeChart.Styles.CircularGauge.Description">
            <summary>
            Gets descriptive text.
            </summary>
        </member>
        <member name="P:Steema.TeeChart.Styles.CircularGauge.HandOffset">
            <summary>
            Gets and sets the distance between the center of the hand and its tail as a percentage of the total distance.
            </summary>
        </member>
        <member name="P:Steema.TeeChart.Styles.CircularGauge.GaugeColorPalette">
            <summary>
            Gets and sets the CircularGauge's color palette.
            </summary>
        </member>
        <member name="P:Steema.TeeChart.Styles.CircularGauge.GreenLineEndValue">
            <summary>
            Gets and sets the value at which the 'redline' marker ends.
            </summary>
        </member>
        <member name="P:Steema.TeeChart.Styles.CircularGauge.GreenLineStartValue">
            <summary>
            Gets and sets the value at which the 'redline' marker starts.
            </summary>
        </member>
        <member name="P:Steema.TeeChart.Styles.CircularGauge.RedLineEndValue">
            <summary>
            Gets and sets the value at which the 'redline' marker ends.
            </summary>
        </member>
        <member name="P:Steema.TeeChart.Styles.CircularGauge.RedLineStartValue">
            <summary>
            Gets and sets the value at which the 'redline' marker starts.
            </summary>
        </member>
        <member name="P:Steema.TeeChart.Styles.CircularGauge.AutoPositionNumericGauge">
            <summary>
            Gets and sets the automatic positioning of the embedded NumericGauge.
            </summary>
        </member>
        <member name="P:Steema.TeeChart.Styles.CircularGauge.AutoValueNumericGauge">
            <summary>
            Gets and sets the whether or not the embedded NumericGauge displays the same value as the CircularGauge.
            </summary>
        </member>
        <member name="P:Steema.TeeChart.Styles.CircularGauge.AutoPositionLinearGauge">
            <summary>
            Gets and sets the automatic positioning of the embedded LinearGauge.
            </summary>
        </member>
        <member name="P:Steema.TeeChart.Styles.CircularGauge.AutoValueLinearGauge">
            <summary>
            Gets and sets the whether or not the embedded LinearGauge displays the same value as the CircularGauge.
            </summary>
        </member>
        <member name="P:Steema.TeeChart.Styles.CircularGauge.LinearGauge">
            <summary>
            Gets and sets properties of an embedded LinearGauge. Set Visible to true to visualize.
            </summary>
        </member>
        <member name="P:Steema.TeeChart.Styles.CircularGauge.NumericGauge">
            <summary>
            Gets and sets properties of an embedded NumericGauge. Set Visible to true to visualize.
            </summary>
        </member>
        <member name="P:Steema.TeeChart.Styles.CircularGauge.RedLine">
            <summary>
            The 'redline' object is the curved shape with a gradient which is used to signal a high or maximum value.
            </summary>
        </member>
        <member name="P:Steema.TeeChart.Styles.CircularGauge.GreenLine">
            <summary>
            The 'greenline' object is the curved shape with a gradient which is used to signal a low or minimum value.
            </summary>
        </member>
        <member name="P:Steema.TeeChart.Styles.CircularGauge.MinorTicks">
            <summary>
            Gets and sets the characteristics of the Axis' minor tick marks.
            </summary>
        </member>
        <member name="P:Steema.TeeChart.Styles.CircularGauge.Ticks">
            <summary>
            Gets and sets the characteristics of the Axis' major tick marks.
            </summary>
        </member>
        <member name="P:Steema.TeeChart.Styles.CircularGauge.Frame">
            <summary>
            The Frame is the object which surrounds the CircularGauge and which consists of three configurable Bands: Inner, Middle and Outer.
            </summary>
        </member>
        <member name="P:Steema.TeeChart.Styles.CircularGauge.RotateLabels">
            <summary>
            When true, labels are rotated so to appear parallel to the curved CircularGauge axis.
            </summary>
        </member>
        <member name="P:Steema.TeeChart.Styles.CircularGauge.Hand">
            <summary>
            Gets and sets the Hand (or needle) object characteristics.
            </summary>
        </member>
        <member name="P:Steema.TeeChart.Styles.CircularGauge.CustomBounds">
            <summary>
            Gets or sets a custom bounding rectangle for the gauge.
            </summary>
        </member>
        <member name="P:Steema.TeeChart.Styles.CircularGauge.FillToSemiCircle">
            <summary>
            Gets or sets whether or not a semi-circular GaugeSeries is filled.
            </summary>
        </member>
        <member name="P:Steema.TeeChart.Styles.CircularGauge.FaceBrush">
            <summary>
            ChartBrush characteristics of the CircularGauge's face.
            </summary>
        </member>
        <member name="P:Steema.TeeChart.Styles.CircularGauge.MinorTickDistance">
            <summary>
            The distance between the minor ticks and the CircularGauge curved axis.
            </summary>
        </member>
        <member name="P:Steema.TeeChart.Styles.CircularGauge.Minimum">
            <summary>
            Gets or sets the minimum value for the gauge.
            </summary>
        </member>
        <member name="P:Steema.TeeChart.Styles.CircularGauge.Maximum">
            <summary>
            Gets or sets the maximum value for the gauge.
            </summary>
        </member>
        <member name="P:Steema.TeeChart.Styles.CircularGauge.TotalAngle">
            <summary>
            Controls the size in degrees for the gauge axis.
            </summary>
        </member>
        <member name="P:Steema.TeeChart.Styles.CircularGauge.DisplayTotalAngle">
            <summary>
            Gets and sets the total display angle of the Frame.
            </summary>
        </member>
        <member name="P:Steema.TeeChart.Styles.CircularGauge.DisplayRotationAngle">
            <summary>
            Gets and sets the angle of Frame rotation.
            </summary>
        </member>
        <member name="P:Steema.TeeChart.Styles.CircularGauge.Value">
            <summary>
            Gets or sets the position of gauge arrow line.
            </summary>
        </member>
        <member name="P:Steema.TeeChart.Styles.CircularGauge.LabelsInside">
            <summary>
            Defines where to display gauge axis labels.
            </summary>
        </member>
        <member name="P:Steema.TeeChart.Styles.CircularGauge.Axis">
            <summary>
            Gets the CircularGauges's Axis characteristics.
            </summary>
        </member>
        <member name="P:Steema.TeeChart.Styles.CircularGauge.Center">
            <summary>
            Returns a sub-object with properties that control the appearance of a shape at the middle of gauge.
            </summary>
        </member>
        <member name="P:Steema.TeeChart.Styles.CircularGauge.EndPoint">
            <summary>
            Returns a sub-object with properties that control the appearance of a shape at the end of the gauge arrow.
            </summary>
        </member>
        <member name="P:Steema.TeeChart.Styles.CircularGauge.HandDistance">
            <summary>
            Gets and sets the distance between the center of the hand and its head as a percentage of the total distance.
            </summary>
        </member>
        <member name="P:Steema.TeeChart.Styles.KnobGauge.AxisInside">
            <summary>
            Gets and sets whether not the entire Gauge Axis is displayed outside of the bounding circular area.
            </summary>
        </member>
        <member name="P:Steema.TeeChart.Styles.KnobGauge.Description">
            <summary>
            Gets descriptive text.
            </summary>
        </member>
        <member name="P:Steema.TeeChart.Styles.KnobGauge.HighLightBrush">
            <summary>
            Gets and sets the brush which draws the highlight on the knob.
            </summary>
        </member>
        <member name="P:Steema.TeeChart.Styles.KnobGauge.CenterPoint">
            <summary>
            Returns the Knobgauge centrepoint. Read-only.
            </summary>
        </member>
        <member name="P:Steema.TeeChart.Styles.KnobGauge.ActiveCenter">
            <summary>
            When true, Knobgauge centre responds to mousedragging to modify value.
            </summary>
        </member>
        <member name="T:Steema.TeeChart.Styles.HighLow">
            <summary>
            HighLow series.
            </summary>
        </member>
        <member name="M:Steema.TeeChart.Styles.HighLow.Add(System.Double,System.Double,System.Double)">
            <summary>
            Adds a new High and Low value to a HighLow series.
            </summary>
        </member>
        <member name="M:Steema.TeeChart.Styles.HighLow.Add(System.Double,System.Double,System.Double,System.Drawing.Color)">
            <summary>
            Adds a new High and Low value to a HighLow series and color.
            </summary>
        </member>
        <member name="M:Steema.TeeChart.Styles.HighLow.Add(System.Double,System.Double,System.Double,System.String)">
            <summary>
            Adds a new High and Low value to a HighLow series and label.
            </summary>
        </member>
        <member name="M:Steema.TeeChart.Styles.HighLow.Add(System.Double,System.Double,System.Double,System.String,System.Drawing.Color)">
            <summary>
            Adds a new High and Low value to a HighLow series with label and color.
            </summary>
        </member>
        <member name="M:Steema.TeeChart.Styles.HighLow.Clicked(System.Int32,System.Int32)">
            <summary>
            Calculates if any point is at XY position.
            </summary>
            <returns>Point index</returns>
        </member>
        <member name="M:Steema.TeeChart.Styles.HighLow.DrawValue(System.Int32)">
            <summary>
            Called internally. Draws the "ValueIndex" point of the Series.
            </summary>
        </member>
        <member name="M:Steema.TeeChart.Styles.HighLow.IsValidSourceOf(Steema.TeeChart.Styles.Series)">
            <summary>
            true if Series source is HighLow
            </summary>
        </member>
        <member name="M:Steema.TeeChart.Styles.HighLow.MaxYValue">
            <summary>
            Returns the Maximum Value of the Series Y Values List.
            </summary>
        </member>
        <member name="M:Steema.TeeChart.Styles.HighLow.MinYValue">
            <summary>
            Returns the Minimum Value of the Series Y Values List.
            </summary>
        </member>
        <member name="T:Steema.TeeChart.Styles.GaugesChangeHandler">
            <summary>
            Gauges Series OnChange Event Handler
            </summary>
        </member>
        <member name="T:Steema.TeeChart.Styles.HandStyle">
             <summary>
            Describes the possible values of the <see cref="P:Steema.TeeChart.Styles.Gauges.HandStyle"/> property. 
             </summary>
        </member>
        <member name="F:Steema.TeeChart.Styles.HandStyle.Line">
             <summary>
            Gauge hand drawn as a Line.
             </summary>
        </member>
        <member name="F:Steema.TeeChart.Styles.HandStyle.Triangle">
             <summary>
            Gauge hand drawn as a triangular pointer. 
             </summary>
        </member>
        <member name="T:Steema.TeeChart.Styles.Gauges">
            <summary>
            Gauges Series.
            </summary>
        </member>
        <member name="E:Steema.TeeChart.Styles.Gauges.OnChange">
            <summary>
            Called when the Gauge <see cref="P:Steema.TeeChart.Styles.Gauges.Value"/> property is changed.
            </summary>
        </member>
        <member name="P:Steema.TeeChart.Styles.Gauges.Pen">
            <summary>
            Line pen for Gauge.
            </summary>
        </member>
        <member name="P:Steema.TeeChart.Styles.Gauges.HandStyle">
            <summary>
            Style of Gauge hand.
            </summary>
        </member>
        <member name="P:Steema.TeeChart.Styles.Gauges.TotalAngle">
            <summary>
            Controls the size in degrees for the gauge axis.
            </summary>
        </member>
        <member name="P:Steema.TeeChart.Styles.Gauges.HandDistance">
            <summary>
            The amount in pixels that define a gap between the gauge axis and the end of the gauge arrow line.
            </summary>
        </member>
        <member name="P:Steema.TeeChart.Styles.Gauges.Value">
            <summary>
            Gets or sets the position of gauge arrow line.
            </summary>
        </member>
        <member name="P:Steema.TeeChart.Styles.Gauges.Minimum">
            <summary>
            Gets or sets the minimum value for the gauge.
            </summary>
        </member>
        <member name="P:Steema.TeeChart.Styles.Gauges.Maximum">
            <summary>
            Gets or sets the maximum value for the gauge.
            </summary>
        </member>
        <member name="P:Steema.TeeChart.Styles.Gauges.Center">
            <summary>
            Returns a sub-object with properties that control the appearance of a shape at the middle of gauge.
            </summary>
        </member>
        <member name="P:Steema.TeeChart.Styles.Gauges.EndPoint">
            <summary>
            Returns a sub-object with properties that control the appearance of a shape at the end of the gauge arrow.
            </summary>
        </member>
        <member name="P:Steema.TeeChart.Styles.Gauges.MinorTickDistance">
            <summary>
            Set to a value bigger than zero to display the axis minor ticks (ticks inside normal ticks) displaced from the axis line the specified number of pixels.
            </summary>
        </member>
        <member name="P:Steema.TeeChart.Styles.Gauges.LabelsInside">
            <summary>
            Defines where to display gauge axis labels.
            </summary>
        </member>
        <member name="P:Steema.TeeChart.Styles.Gauges.Description">
            <summary>
            Gets descriptive text.
            </summary>
        </member>
        <member name="T:Steema.TeeChart.Styles.Donut">
            <summary>
            Donut series.
            </summary>
        </member>
        <member name="T:Steema.TeeChart.Styles.Pie">
            <summary>
            Pie Series.
            </summary>
        </member>
        <member name="M:Steema.TeeChart.Styles.Pie.DrawValue(System.Int32)">
            <summary>
            Called internally. Draws the "ValueIndex" point of the Series.
            </summary>
        </member>
        <member name="M:Steema.TeeChart.Styles.Pie.BelongsToOtherSlice(System.Int32)">
            <summary>
            Returns true if indexed Slice belongs to the Otherslice
            </summary>
        </member>
        <member name="M:Steema.TeeChart.Styles.Pie.CalcXPos(System.Int32)">
            <summary>
            Returns the pixel Screen Horizontal coordinate of the ValueIndex Series value.
            </summary>
        </member>
        <member name="P:Steema.TeeChart.Styles.Pie.PieValues">
            <summary>
            Stores the Pie slice values.
            </summary>
        </member>
        <member name="P:Steema.TeeChart.Styles.Pie.ColorEach">
            <summary>
            Draws points with different preset Colors.
            </summary>
        </member>
        <member name="P:Steema.TeeChart.Styles.Pie.AngleSize">
            <summary>
            Total angle in degrees (0 to 360) for all slices.
            </summary>
        </member>
        <member name="P:Steema.TeeChart.Styles.Pie.Dark3D">
            <summary>
            Darkens side of 3D pie section to add depth.
            </summary>
        </member>
        <member name="P:Steema.TeeChart.Styles.Pie.Transparency">
            <summary>
            Sets Transparency level from 0 to 100%.
            </summary>
        </member>
        <member name="P:Steema.TeeChart.Styles.Pie.EdgeStyle">
            <summary>
            Gets and sets the EdgeStyle of the bevel.
            </summary>
        </member>
        <member name="P:Steema.TeeChart.Styles.Pie.BevelPercent">
            <summary>
            Gets and sets the bevel as a percentage of the pie's depth.
            </summary>
        </member>
        <member name="P:Steema.TeeChart.Styles.Pie.ExplodeBiggest">
            <summary>
            Displaces the biggest slice from centre by value set.
            </summary>
        </member>
        <member name="P:Steema.TeeChart.Styles.Pie.OtherSlice">
            <summary>
            Accesses the OtherSlice properties.
            </summary>
        </member>
        <member name="P:Steema.TeeChart.Styles.Pie.Pen">
            <summary>
            Line pen for Pie.
            </summary>
        </member>
        <member name="P:Steema.TeeChart.Styles.Pie.Brush">
            <summary>
            Brush fill for PieSeries.
            </summary>
        </member>
        <member name="P:Steema.TeeChart.Styles.Pie.Shadow">
            <summary>
            Defines the offset shadow of the PieSeries.
            </summary>
        </member>
        <member name="P:Steema.TeeChart.Styles.Pie.UsePatterns">
            <summary>
            Fills Pie Sectors with different Brush pattern styles.
            </summary>
        </member>
        <member name="P:Steema.TeeChart.Styles.Pie.AutoMarkPosition">
            <summary>
            If true, marks will be displayed trying to not overlap one to each other.
            </summary>
        </member>
        <member name="P:Steema.TeeChart.Styles.Pie.MultiPie">
            <summary>
            Sets automatic Pie positioning when multiple Pie series exist.
            </summary>
        </member>
        <member name="P:Steema.TeeChart.Styles.Pie.ExplodedSlice">
            <summary>
            Accesses the properties for exploding any Pie slice.
            </summary>
        </member>
        <member name="P:Steema.TeeChart.Styles.Pie.SliceHeight">
            <summary>
            Use SliceHeight array property to specify a different height for each pie slice.
            </summary>
        </member>
        <member name="T:Steema.TeeChart.Styles.Pie.PieAngle">
             <summary>
            Internal structure used by Pie series to store each pie slice angle. 
             </summary>
        </member>
        <member name="M:Steema.TeeChart.Styles.Pie.PieAngle.Contains(System.Double)">
             <summary>
            Returns true if angle is within the pie slice. 
             </summary>
        </member>
        <member name="T:Steema.TeeChart.Styles.Pie.PieMarks">
            <summary>
            Customized pie series marks with additional properties.
            </summary>
        </member>
        <member name="T:Steema.TeeChart.Styles.Pie.PieOtherSlice">
             <summary>
            Pie series uses this class in its <see cref="P:Steema.TeeChart.Styles.Pie.OtherSlice"/> property. 
             </summary>
        </member>
        <member name="P:Steema.TeeChart.Styles.Pie.PieOtherSlice.Color">
            <summary>
            Sets the Color of the OtherSlice.
            </summary>
        </member>
        <member name="P:Steema.TeeChart.Styles.Pie.PieOtherSlice.Legend">
            <summary>
            Sets the properties of the PieOtherSlice Legend.
            </summary>
            <example> This sample shows how to use the PieOtherSlice Legend property:
            <code>
            // prepare "Other" to group values below 10
            pie1.OtherSlice.Style=Steema.TeeChart.Styles.PieOtherStyles.BelowValue;
            pie1.OtherSlice.Value=10;
            pie1.OtherSlice.Text = "Other";
            pie1.OtherSlice.Legend.Visible = true;
            pie1.OtherSlice.Legend.CustomPosition = true;
            pie1.OtherSlice.Legend.Left = 350;
            pie1.OtherSlice.Legend.Top = 150;
            </code>
            </example>
        </member>
        <member name="P:Steema.TeeChart.Styles.Pie.PieOtherSlice.Text">
            <summary>
            Title for otherSlice.
            </summary>
        </member>
        <member name="P:Steema.TeeChart.Styles.Pie.PieOtherSlice.Value">
            <summary>
            Value (value or percentage) for Otherslice grouping.
            </summary>
        </member>
        <member name="P:Steema.TeeChart.Styles.Pie.PieOtherSlice.Style">
            <summary>
            Sets either value or percentage to group the 'other' Pie slice.
            </summary>
        </member>
        <member name="T:Steema.TeeChart.Styles.Pie.PieShadow">
             <summary>
            Pie series uses this class in its <see cref="P:Steema.TeeChart.Styles.Pie.Shadow"/> property.  
             </summary>
        </member>
        <member name="T:Steema.TeeChart.Drawing.Shadow">
            <summary>
            Properties to draw a shadow.
            </summary>
        </member>
        <member name="M:Steema.TeeChart.Drawing.Shadow.#ctor(Steema.TeeChart.Chart)">
            <summary>
            Chart Shadow Constructor 
            </summary>
        </member>
        <member name="M:Steema.TeeChart.Drawing.Shadow.#ctor(Steema.TeeChart.Chart,System.Int32)">
            <summary>
            Chart Shadow Constructor, defines Shadow size
            </summary>
        </member>
        <member name="M:Steema.TeeChart.Drawing.Shadow.Assign(Steema.TeeChart.Drawing.Shadow)">
            <summary>
            Assign characteristics of Shadow 'value'
            </summary>
        </member>
        <member name="M:Steema.TeeChart.Drawing.Shadow.Draw(Steema.TeeChart.Drawing.Graphics3D,System.Drawing.Rectangle)">
            <summary>
            Draws a shadow around the Rect rectangle parameter.
            </summary>
        </member>
        <member name="M:Steema.TeeChart.Drawing.Shadow.Draw(Steema.TeeChart.Drawing.Graphics3D,System.Int32,System.Int32,System.Int32,System.Int32)">
            <summary>
            Draws a shadow around the ellipse described by the top left and botton right parameters.
            </summary>
        </member>
        <member name="M:Steema.TeeChart.Drawing.Shadow.Draw(Steema.TeeChart.Drawing.Graphics3D,System.Int32,System.Int32,System.Int32,System.Int32,System.Int32)">
            <summary>
            Draws a shadow around the ellipse described by the top left and botton right parameters.
            </summary>
        </member>
        <member name="M:Steema.TeeChart.Drawing.Shadow.Draw(Steema.TeeChart.Drawing.Graphics3D,System.Int32,System.Int32,System.Drawing.Point[])">
            <summary>
            Draws a shadow around the polygon described by the array of points parameter.
            </summary>
        </member>
        <member name="M:Steema.TeeChart.Drawing.Shadow.Draw(Steema.TeeChart.Drawing.Graphics3D,System.Int32,System.Int32,Steema.TeeChart.Drawing.PointDouble[])">
            <summary>
            Draws a shadow around the polygon described by the array of points parameter.
            </summary>
        </member>
        <member name="M:Steema.TeeChart.Drawing.Shadow.Draw(Steema.TeeChart.Drawing.Graphics3D,System.Drawing.Rectangle,System.Int32,System.Int32,System.Int32)">
            <summary>
            Draws a shadow around the Rect rectangle parameter.
            </summary>
        </member>
        <member name="M:Steema.TeeChart.Drawing.Shadow.Draw(Steema.TeeChart.Drawing.Graphics3D,System.Drawing.Rectangle,System.Int32,System.Int32)">
            <summary>
            Draws a shadow around the Rect rectangle parameter.
            </summary>
        </member>
        <member name="P:Steema.TeeChart.Drawing.Shadow.Color">
            <summary>
            Gets or sets Color used to fill.
            </summary>
        </member>
        <member name="P:Steema.TeeChart.Drawing.Shadow.Transparency">
            <summary>
            Sets Transparency level from 0 to 100% of shadow.
            </summary>
        </member>
        <member name="P:Steema.TeeChart.Drawing.Shadow.Smooth">
            <summary>
            Gets and sets if the shadow will be displayed as a rectangle with smooth edges.
            </summary>
        </member>
        <member name="P:Steema.TeeChart.Drawing.Shadow.SmoothBlur">
            <summary>
            Gets and sets if the shadow will be displayed as a rectangle with smooth edges.
            </summary>
        </member>
        <member name="P:Steema.TeeChart.Drawing.Shadow.Height">
            <summary>
            Sets the vertical displacement of the shadow in pixels.
            </summary>
        </member>
        <member name="P:Steema.TeeChart.Drawing.Shadow.Width">
            <summary>
            Sets the horizontal shadow size in pixels.
            </summary>
        </member>
        <member name="P:Steema.TeeChart.Drawing.Shadow.Brush">
            <summary>
            Defines the Brush characteristics to fill the shadow.
            </summary>
        </member>
        <member name="P:Steema.TeeChart.Drawing.Shadow.Size">
            <summary>
            Size in pixels of shadow.
            </summary>
        </member>
        <member name="P:Steema.TeeChart.Drawing.Shadow.Visible">
            <summary>
            Determines whether the shadow will appear on screen.
            </summary>
        </member>
        <member name="T:Steema.TeeChart.Styles.Pie.ExplodedSliceList">
            <summary>
            List to hold percents of exploding effect, one per each Pie slice.
            </summary>
        </member>
        <member name="T:Steema.TeeChart.Functions.Stochastic">
            <summary>
            Stochastic Function.
            </summary>
        </member>
        <member name="T:Steema.TeeChart.Functions.Moving">
            <summary>
            Internal use. Base class for moving calculation functions
            </summary>
        </member>
        <member name="T:Steema.TeeChart.Functions.Function">
            <summary>
            Basic functions (Add, Subtract, High, Low, Average and Count).
            </summary>
        </member>
        <member name="M:Steema.TeeChart.Functions.Function.Calculate(Steema.TeeChart.Styles.Series,System.Int32,System.Int32)">
            <summary>
            Performs function operation on SourceSeries series.
            </summary>
        </member>
        <member name="M:Steema.TeeChart.Functions.Function.CalculateMany(System.Collections.ArrayList,System.Int32)">
            <summary>
            Performs function operation on list of series (SourceSeriesList).
            </summary>
        </member>
        <member name="M:Steema.TeeChart.Functions.Function.AddPoints(System.Array)">
            <summary>
            Gets all points from Source series, performs a function operation and stores results in ParentSeries.
            </summary>
        </member>
        <member name="M:Steema.TeeChart.Functions.Function.Recalculate">
            <summary>
            Performs a CheckDataSource method on ParentSeries. 
            </summary>
        </member>
        <member name="P:Steema.TeeChart.Functions.Function.Period">
            <summary>
            Controls how many points or X range will trigger a new point calculation.
            </summary>
        </member>
        <member name="P:Steema.TeeChart.Functions.Function.Series">
            <summary>
            Returns the TChartSeries parent of TTeeFunction. 
            </summary>
        </member>
        <member name="P:Steema.TeeChart.Functions.Function.PeriodStyle">
            <summary>
            Controls how the Period property is interpreted. 
            </summary>
        </member>
        <member name="P:Steema.TeeChart.Functions.Function.PeriodAlign">
            <summary>
            Controls where to place function calculations inside the full period space. 
            </summary>
        </member>
        <member name="M:Steema.TeeChart.Functions.Stochastic.AddPoints(System.Array)">
            <summary>
            Gets all points from Source series, performs a function operation on points and stores results in ParentSeries.
            </summary>
        </member>
        <member name="M:Steema.TeeChart.Functions.Stochastic.Calculate(Steema.TeeChart.Styles.Series,System.Int32,System.Int32)">
            <summary>
            Performs function operation on SourceSeries series. 
            </summary>
        </member>
        <member name="T:Steema.TeeChart.Functions.PeriodStyles">
             <summary>
            Descibes function period as a number of points or as a range of points. 
             </summary>
        </member>
        <member name="F:Steema.TeeChart.Functions.PeriodStyles.NumPoints">
             <summary>
            Defines function period as a number of points.
             </summary>
        </member>
        <member name="F:Steema.TeeChart.Functions.PeriodStyles.Range">
             <summary>
            Defines function period as a range of points. 
             </summary>
        </member>
        <member name="T:Steema.TeeChart.Functions.PeriodAligns">
             <summary>
            Descibes how a function is aligned with respect to the source series. 
             </summary>
        </member>
        <member name="F:Steema.TeeChart.Functions.PeriodAligns.First">
             <summary>
            Aligns the function with the first point of the function period. 
             </summary>
        </member>
        <member name="F:Steema.TeeChart.Functions.PeriodAligns.Center">
             <summary>
            Aligns the function with the centre point of the function period.  
             </summary>
        </member>
        <member name="F:Steema.TeeChart.Functions.PeriodAligns.Last">
             <summary>
            Aligns the function with the last point of the function period. 
             </summary>
        </member>
        <member name="T:Steema.TeeChart.Functions.MovingAverage">
            <summary>
            Moving Average Function
            </summary>
        </member>
        <member name="M:Steema.TeeChart.Functions.MovingAverage.Calculate(Steema.TeeChart.Styles.Series,System.Int32,System.Int32)">
            <summary>
            Performs function operation on SourceSeries series.
            </summary>
        </member>
        <member name="P:Steema.TeeChart.Functions.MovingAverage.Weighted">
            <summary>
            Set Weighted to true to calculate Mov. Avg. using the corresponding X point values.
            </summary>
        </member>
        <member name="P:Steema.TeeChart.Functions.MovingAverage.WeightedIndex">
            <summary>
            Set WeightedIndex to true to calculate Mov. Avg. using the source points index as the "weight".
            </summary>
        </member>
        <member name="T:Steema.TeeChart.Functions.Add">
            <summary>
            Add Function.
            </summary>
        </member>
        <member name="M:Steema.TeeChart.Functions.Add.Calculate(Steema.TeeChart.Styles.Series,System.Int32,System.Int32)">
            <summary>
            Performs function operation on SourceSeries series. 
            </summary>
        </member>
        <member name="M:Steema.TeeChart.Functions.Add.CalculateMany(System.Collections.ArrayList,System.Int32)">
            <summary>
            Performs function operation on list of series (SourceSeriesList). 
            </summary>
        </member>
        <member name="T:Steema.TeeChart.Functions.ManySeries">
            <summary>
            Internal use. Base class for multiple Series function calculations
            </summary>
        </member>
        <member name="M:Steema.TeeChart.Functions.ManySeries.CalculateMany(System.Collections.ArrayList,System.Int32)">
            <summary>
            Performs function operation on list of series (SourceSeriesList).
            </summary>
        </member>
        <member name="T:Steema.TeeChart.Functions.Subtract">
            <summary>
            Subtract Function.
            </summary>
        </member>
        <member name="T:Steema.TeeChart.Functions.Multiply">
            <summary>
            Multiply Function.
            </summary>
        </member>
        <member name="T:Steema.TeeChart.Functions.Divide">
            <summary>
            Divide Function.
            </summary>
        </member>
        <member name="T:Steema.TeeChart.Functions.High">
            <summary>
            High Function. Returns highest value.
            </summary>
        </member>
        <member name="M:Steema.TeeChart.Functions.High.Calculate(Steema.TeeChart.Styles.Series,System.Int32,System.Int32)">
            <summary>
            Performs function operation on SourceSeries series.
            </summary>
        </member>
        <member name="M:Steema.TeeChart.Functions.High.CalculateMany(System.Collections.ArrayList,System.Int32)">
            <summary>
            Performs function operation on list of series (SourceSeriesList).
            </summary>
        </member>
        <member name="T:Steema.TeeChart.Functions.Low">
            <summary>
            Low Function. Returns lowest value.
            </summary>
        </member>
        <member name="M:Steema.TeeChart.Functions.Low.Calculate(Steema.TeeChart.Styles.Series,System.Int32,System.Int32)">
            <summary>
            Performs function operation on SourceSeries series.
            </summary>
        </member>
        <member name="M:Steema.TeeChart.Functions.Low.CalculateMany(System.Collections.ArrayList,System.Int32)">
            <summary>
            Performs function operation on list of series (SourceSeriesList).
            </summary>
        </member>
        <member name="T:Steema.TeeChart.Functions.Average">
            <summary>
            Average (mean) Function.
            </summary>
        </member>
        <member name="M:Steema.TeeChart.Functions.Average.Calculate(Steema.TeeChart.Styles.Series,System.Int32,System.Int32)">
            <summary>
            Performs function operation on SourceSeries series.
            </summary>
        </member>
        <member name="M:Steema.TeeChart.Functions.Average.CalculateMany(System.Collections.ArrayList,System.Int32)">
            <summary>
            Performs function operation on list of series (SourceSeriesList).
            </summary>
        </member>
        <member name="P:Steema.TeeChart.Functions.Average.IncludeNulls">
            <summary>
            Calculates the average using only the non-null points of a series, or not.
            </summary>
        </member>
        <member name="T:Steema.TeeChart.Functions.Count">
            <summary>
            Count Function.
            </summary>
        </member>
        <member name="M:Steema.TeeChart.Functions.Count.Calculate(Steema.TeeChart.Styles.Series,System.Int32,System.Int32)">
            <summary>
            Performs function operation on SourceSeries series.
            </summary>
        </member>
        <member name="M:Steema.TeeChart.Functions.Count.CalculateMany(System.Collections.ArrayList,System.Int32)">
            <summary>
            Performs function operation on list of series (SourceSeriesList).
            </summary>
        </member>
        <member name="T:Steema.TeeChart.Functions.Cumulative">
            <summary>
            Cumulative Function.
            The TCumulative function sums the Series values starting from the first point.
            Example:
            Given these values:  1 2 3
             The TCumulative function returns:  1 3 6  ( 1=1, 1+2=3 and 1+2+3=6 )
            </summary>
        </member>
        <member name="M:Steema.TeeChart.Functions.Cumulative.Calculate(Steema.TeeChart.Styles.Series,System.Int32,System.Int32)">
            <summary>
            Performs function operation on SourceSeries series.
            </summary>
        </member>
        <member name="M:Steema.TeeChart.Functions.Cumulative.CalculateMany(System.Collections.ArrayList,System.Int32)">
            <summary>
            Performs function operation on list of series (SourceSeriesList).
            </summary>
        </member>
        <member name="T:Steema.TeeChart.Functions.Momentum">
            <summary>
            Momentum Function.
            </summary>
        </member>
        <member name="M:Steema.TeeChart.Functions.Momentum.Calculate(Steema.TeeChart.Styles.Series,System.Int32,System.Int32)">
            <summary>
            Performs function operation on SourceSeries series.
            </summary>
        </member>
        <member name="T:Steema.TeeChart.Functions.MomentumDivision">
            <summary>
            Momentum Division Function.
            </summary>
        </member>
        <member name="M:Steema.TeeChart.Functions.MomentumDivision.Calculate(Steema.TeeChart.Styles.Series,System.Int32,System.Int32)">
            <summary>
            Performs function operation on SourceSeries series.
            </summary>
        </member>
        <member name="T:Steema.TeeChart.Functions.ExpAverage">
            <summary>
            Exponential Average Function.
            </summary>
        </member>
        <member name="M:Steema.TeeChart.Functions.ExpAverage.Calculate(Steema.TeeChart.Styles.Series,System.Int32,System.Int32)">
            <summary>
            Performs function operation on SourceSeries series.
            </summary>
        </member>
        <member name="P:Steema.TeeChart.Functions.ExpAverage.Weight">
            <summary>
            Performs an Exponential average based on its DataSource values.
            </summary>
        </member>
        <member name="T:Steema.TeeChart.Functions.ExpMovAverage">
            <summary>
            Exponential Moving Average Function
            </summary>
        </member>
        <member name="T:Steema.TeeChart.Functions.ADXFunction">
             <summary>
            The ADXFunction is normally used in financial trending applications to determine whether a market is trending, or moving 
            sideways.
            
            A high ADX reading indicates a trending market. 
            
            A rising ADX indicates a trending market (either up or down). 
            
            If the ADX reaches 40 or greater, look for a signal that indicates the trend is over. 
            
            An ADX of 20 or less indicates a sideways market.
             </summary>
        </member>
        <member name="M:Steema.TeeChart.Functions.ADXFunction.AddPoints(System.Array)">
             <summary>
            Gets all points from Source series, performs a function operation and stores results in ParentSeries. 
             </summary>
        </member>
        <member name="P:Steema.TeeChart.Functions.ADXFunction.DMDown">
             <summary>
             Access characteristics of the DMDown line (a FastLineSeries).
            
             DMDown is a sub-series (of type FastLine) of ADX function.
             </summary>
        </member>
        <member name="P:Steema.TeeChart.Functions.ADXFunction.DMUp">
             <summary>
             Access characteristics of the DMUp line (a FastLineSeries).
            
             DMUp is a sub-series (of type FastLine) of ADX function.
             </summary>
        </member>
        <member name="P:Steema.TeeChart.Functions.ADXFunction.UpLinePen">
            <summary>
            The pen used to draw the upper ADX line.
            Corresponds to DMUp.Pen property.
            <code>
            aDXFunction1.UpLinePen.Color = Color.Blue ; 
            </code>
            </summary>
        </member>
        <member name="P:Steema.TeeChart.Functions.ADXFunction.DownLinePen">
            <summary>
            The pen used to draw the lower ADX line.
            Corresponds to DMDown.Pen property.
            </summary>
        </member>
        <member name="T:Steema.TeeChart.Editors.Export.PCXOptions">
            <summary>
            PCX Export Format.
            </summary>
        </member>
        <member name="F:Steema.TeeChart.Editors.Export.PCXOptions.components">
            <summary>
            Required designer variable.
            </summary>
        </member>
        <member name="M:Steema.TeeChart.Editors.Export.PCXOptions.Dispose(System.Boolean)">
            <summary>
            Clean up any resources being used.
            </summary>
        </member>
        <member name="M:Steema.TeeChart.Editors.Export.PCXOptions.InitializeComponent">
            <summary>
            Required method for Designer support - do not modify
            the contents of this method with the code editor.
            </summary>
        </member>
        <member name="T:Steema.TeeChart.Editors.Export.EmfOptions">
            <summary>
            Metafile Export Options.
            </summary>
        </member>
        <member name="F:Steema.TeeChart.Editors.Export.EmfOptions.components">
            <summary>
            Required designer variable.
            </summary>
        </member>
        <member name="M:Steema.TeeChart.Editors.Export.EmfOptions.Dispose(System.Boolean)">
            <summary>
            Clean up any resources being used.
            </summary>
        </member>
        <member name="M:Steema.TeeChart.Editors.Export.EmfOptions.InitializeComponent">
            <summary>
            Required method for Designer support - do not modify
            the contents of this method with the code editor.
            </summary>
        </member>
        <member name="T:Steema.TeeChart.Editors.Tools.ScrollBarEditor">
            <summary>
            Summary description for ScrollBarEditor.
            </summary>
        </member>
        <member name="F:Steema.TeeChart.Editors.Tools.ScrollBarEditor.components">
            <summary>
            Required designer variable.
            </summary>
        </member>
        <member name="M:Steema.TeeChart.Editors.Tools.ScrollBarEditor.Dispose(System.Boolean)">
            <summary>
            Clean up any resources being used.
            </summary>
        </member>
        <member name="M:Steema.TeeChart.Editors.Tools.ScrollBarEditor.InitializeComponent">
            <summary>
            Required method for Designer support - do not modify
            the contents of this method with the code editor.
            </summary>
        </member>
        <member name="T:Steema.TeeChart.Editors.Tools.HotspotEditor">
            <summary>
            Summary description for HotspotEditor.
            </summary>
        </member>
        <member name="T:Steema.TeeChart.Editors.Tools.ToolSeriesEditor">
            <summary>
            ToolSeries Editor.
            </summary>
        </member>
        <member name="F:Steema.TeeChart.Editors.Tools.ToolSeriesEditor.components">
            <summary>
            Required designer variable.
            </summary>
        </member>
        <member name="M:Steema.TeeChart.Editors.Tools.ToolSeriesEditor.Dispose(System.Boolean)">
            <summary>
            Clean up any resources being used.
            </summary>
        </member>
        <member name="M:Steema.TeeChart.Editors.Tools.ToolSeriesEditor.InitializeComponent">
            <summary>
            Required method for Designer support - do not modify
            the contents of this method with the code editor.
            </summary>
        </member>
        <member name="F:Steema.TeeChart.Editors.Tools.HotspotEditor.components">
            <summary>
            Required designer variable.
            </summary>
        </member>
        <member name="M:Steema.TeeChart.Editors.Tools.HotspotEditor.Dispose(System.Boolean)">
            <summary>
            Clean up any resources being used.
            </summary>
        </member>
        <member name="M:Steema.TeeChart.Editors.Tools.HotspotEditor.InitializeComponent">
            <summary>
            Required method for Designer support - do not modify
            the contents of this method with the code editor.
            </summary>
        </member>
        <member name="M:Steema.TeeChart.Editors.Tools.ExtraLegendEditor.Dispose(System.Boolean)">
            <summary>
            Clean up any resources being used.
            </summary>
        </member>
        <member name="M:Steema.TeeChart.Editors.Tools.ExtraLegendEditor.InitializeComponent">
            <summary>
            Required method for Designer support - do not modify
            the contents of this method with the code editor.
            </summary>
        </member>
        <member name="T:Steema.TeeChart.Editors.Tools.AxisToolEdit">
            <summary>
            Summary description for AxisToolEdit.
            </summary>
        </member>
        <member name="F:Steema.TeeChart.Editors.Tools.AxisToolEdit.components">
            <summary>
            Required designer variable.
            </summary>
        </member>
        <member name="M:Steema.TeeChart.Editors.Tools.AxisToolEdit.Dispose(System.Boolean)">
            <summary>
            Clean up any resources being used.
            </summary>
        </member>
        <member name="M:Steema.TeeChart.Editors.Tools.AxisToolEdit.InitializeComponent">
            <summary>
            Required method for Designer support - do not modify
            the contents of this method with the code editor.
            </summary>
        </member>
        <member name="M:Steema.TeeChart.Editors.Tools.ColorLineEditor.Dispose(System.Boolean)">
            <summary>
            Clean up any resources being used.
            </summary>
        </member>
        <member name="M:Steema.TeeChart.Editors.Tools.ColorLineEditor.InitializeComponent">
            <summary>
            Required method for Designer support - do not modify
            the contents of this method with the code editor.
            </summary>
        </member>
        <member name="T:Steema.TeeChart.Editors.Series.TowerSeries">
            <summary>
            Summary description for TowerEditor.
            </summary>
        </member>
        <member name="T:Steema.TeeChart.Editors.Series.BaseSeriesForm">
            <summary>
            Summary description for BaseSeriesForm.
            </summary>
        </member>
        <member name="F:Steema.TeeChart.Editors.Series.TowerSeries.components">
            <summary>
            Required designer variable.
            </summary>
        </member>
        <member name="M:Steema.TeeChart.Editors.Series.TowerSeries.Dispose(System.Boolean)">
            <summary>
            Clean up any resources being used.
            </summary>
        </member>
        <member name="M:Steema.TeeChart.Editors.Series.TowerSeries.InitializeComponent">
            <summary>
            Required method for Designer support - do not modify
            the contents of this method with the code editor.
            </summary>
        </member>
        <member name="T:Steema.TeeChart.Editors.Series.ShapeSeries">
            <summary>
            Summary description for ShapeEditor.
            </summary>
        </member>
        <member name="F:Steema.TeeChart.Editors.Series.ShapeSeries.components">
            <summary>
            Required designer variable.
            </summary>
        </member>
        <member name="M:Steema.TeeChart.Editors.Series.ShapeSeries.Dispose(System.Boolean)">
            <summary>
            Clean up any resources being used.
            </summary>
        </member>
        <member name="M:Steema.TeeChart.Editors.Series.ShapeSeries.InitializeComponent">
            <summary>
            Required method for Designer support - do not modify
            the contents of this method with the code editor.
            </summary>
        </member>
        <member name="T:Steema.TeeChart.Editors.Series.PolarSeries">
            <summary>
            Polar Series Editor.
            </summary>
        </member>
        <member name="F:Steema.TeeChart.Editors.Series.PolarSeries.components">
            <summary>
            Required designer variable.
            </summary>
        </member>
        <member name="M:Steema.TeeChart.Editors.Series.PolarSeries.Dispose(System.Boolean)">
            <summary>
            Clean up any resources being used.
            </summary>
        </member>
        <member name="M:Steema.TeeChart.Editors.Series.PolarSeries.InitializeComponent">
            <summary>
            Required method for Designer support - do not modify
            the contents of this method with the code editor.
            </summary>
        </member>
        <member name="T:Steema.TeeChart.GalleryPanel">
            <summary>
            A derived WinForms Panel class to hold a Series gallery.
            </summary>
        </member>
        <member name="F:Steema.TeeChart.GalleryPanel.GalleryNumRows">
            <summary>
            The number of Rows in Gallery panel.
            </summary>
        </member>
        <member name="F:Steema.TeeChart.GalleryPanel.GalleryNumCols">
            <summary>
            The number of Columns in Gallery panel.
            </summary>
        </member>
        <member name="F:Steema.TeeChart.GalleryPanel.CursorDisabled">
            <summary>
            The mouse cursor for Series styles not allowed (disabled).
            </summary>
        </member>
        <member name="F:Steema.TeeChart.GalleryPanel.CheckMaximize">
            <summary>
            Determines if Gallery panel will show Chart axis or not when maximized.
            </summary>
        </member>
        <member name="F:Steema.TeeChart.GalleryPanel.FunctionsVisible">
            <summary>
            Controls wether Functions tab is visible or not.
            </summary>
        </member>
        <member name="M:Steema.TeeChart.GalleryPanel.SetSubSelected(Steema.TeeChart.Styles.Series,System.Int32)">
             <summary>
            Sets the chart selected from the SubGallery. 
             </summary>
        </member>
        <member name="F:Steema.TeeChart.GalleryPanel.Charts">
            <summary>
            List of Charts showing at Gallery panel.
            </summary>
        </member>
        <member name="P:Steema.TeeChart.GalleryPanel.DisplaySub">
            <summary>
            Gets or sets if GalleryPanel will display a sub-gallery when clicking left-bottom corner small arrow.
            </summary>
        </member>
        <member name="E:Steema.TeeChart.GalleryPanel.OnSelectedChart">
            <summary>
            Event called when a Chart is selected and double-clicked at Gallery.
            </summary>
        </member>
        <member name="E:Steema.TeeChart.GalleryPanel.OnSubSelected">
            <summary>
            Event called when a Series sub-style is selected at sub-Gallery.
            </summary>
        </member>
        <member name="E:Steema.TeeChart.GalleryPanel.OnChangeChart">
            <summary>
            Event called when a Chart is selected (clicked) at Gallery.
            </summary>
        </member>
        <member name="P:Steema.TeeChart.GalleryPanel.FunctionType">
            <summary>
            Returns currently selected Function style, or null if any.
            </summary>
        </member>
        <member name="P:Steema.TeeChart.GalleryPanel.SubIndex">
             <summary>
            The Index of the subchart selected. 
             </summary>
        </member>
        <member name="P:Steema.TeeChart.GalleryPanel.InitArgs">
             <summary>
            Additional Chart init arguments
             </summary>
        </member>
        <member name="T:Steema.TeeChart.GalleryPanel.GalleryChart">
            <summary>
            Internal Chart class used to display at Gallery panel.
            </summary>
        </member>
        <!-- Badly formed XML comment ignored for member "T:Steema.TeeChart.TChart" -->
        <member name="T:Steema.TeeChart.IChart">
            <summary>
            Common Chart characteristics interface
            </summary>
        </member>
        <member name="F:Steema.TeeChart.TChart.components">
            <summary>
            Required designer variable.
            </summary>
        </member>
        <member name="M:Steema.TeeChart.TChart.Dispose(System.Boolean)">
            <summary>
            Clean up any resources being used.
            </summary>
        </member>
        <member name="M:Steema.TeeChart.TChart.InitializeComponent">
            <summary>
            Required method for Designer support - do not modify 
            the contents of this method with the code editor.
            </summary>
        </member>
        <member name="M:Steema.TeeChart.TChart.AddSeries(Steema.TeeChart.Styles.Series)">
            <summary>
            Adds a new Series into Chart.
            </summary>
        </member>
        <member name="M:Steema.TeeChart.TChart.Clear">
            <summary>
            Reset the Chart to its default values.
            </summary>
        </member>
        <member name="M:Steema.TeeChart.TChart.Draw">
            <summary>
            Paints the Chart internally to calculate Chart values that would otherwise be calculated only when 
            the Chart is actually Painted to the screen.
            </summary>
        </member>
        <member name="M:Steema.TeeChart.TChart.Draw(System.Drawing.Graphics)">
            <summary>
             Paints the Chart in your preferred Canvas and region.
            </summary>
        </member>
        <member name="M:Steema.TeeChart.TChart.Steema#TeeChart#IChart#DoGetLegendPos(System.Object,System.Int32,System.Int32@,System.Int32@,System.Int32@)">
            <summary>
            Triggers GetLegendPos event.
            </summary>
        </member>
        <member name="M:Steema.TeeChart.TChart.ShowEditor(System.ComponentModel.ITypeDescriptorContext)">
            <summary>
            Shows the TeeChart editor dialog.
            </summary>
        </member>
        <member name="M:Steema.TeeChart.TChart.ShowEditor">
            <summary>
            Shows the TeeChart editor dialog.
            </summary>
        </member>
        <member name="M:Steema.TeeChart.TChart.OnInvalidated(System.Windows.Forms.InvalidateEventArgs)">
            This is a different way to handle the _redrawNeeded flag 
        </member>
        <member name="P:Steema.TeeChart.TChart.Printing">
            <summary>
            Determines when Chart is being printed.
            </summary>
        </member>
        <member name="P:Steema.TeeChart.TChart.Metafiling">
            <summary>
            True when the Chart is internally drawing into a Metafile image.
            </summary>
        </member>
        <member name="P:Steema.TeeChart.TChart.BackColor">
            <summary>
            Sets the color the Chart rectangle is filled with.
            </summary>
        </member>
        <member name="P:Steema.TeeChart.TChart.AutoRepaint">
            <summary>
            Enables/Disables Repainting of Chart when points are added.
            </summary>
        </member>
        <member name="P:Steema.TeeChart.TChart.TimerEnabled">
            <summary>
            Obsolete. Enables or disables the internal timer used to auto-repaint Chart.
            Use a standard Timer component to call tChart1.Invalidate() instead.
            </summary>
        </member>
        <member name="P:Steema.TeeChart.TChart.Bitmap">
            <summary>
            Returns a Bitmap image filled with Chart.
            </summary>
        </member>
        <member name="P:Steema.TeeChart.TChart.Metafile">
            <summary>
            Returns a Metafile image filled with Chart.
            </summary>
        </member>
        <member name="P:Steema.TeeChart.TChart.TimerInterval">
            <summary>
            Obsolete. Gets or sets the interval in milliseconds used to auto-repaint Chart.
            Use a standard Timer component to call tChart1.Invalidate() instead.
            </summary>
        </member>
        <member name="P:Steema.TeeChart.TChart.Frame">
            <summary>
            Obsolete. Determines properties of frame around chart back wall.
            Use tChart1.Walls.Back.Pen property instead.
            </summary>
        </member>
        <member name="P:Steema.TeeChart.TChart.SeriesCount">
            <summary>
            Obsolete. Returns number of Series in Chart.
            Use tChart1.Series.Count property instead.
            </summary>
        </member>
        <member name="P:Steema.TeeChart.TChart.Site">
            <summary>
            Gets or sets the site of the TChart control.
            </summary>
        </member>
        <member name="P:Steema.TeeChart.TChart.Chart">
            <summary>
            Defines the Chart to display. 
            </summary>
        </member>
        <member name="P:Steema.TeeChart.TChart.Text">
            <summary>
            Sets the text for the Footer, Header, SubFooter and SubHeader.
            </summary>
        </member>
        <member name="P:Steema.TeeChart.TChart.Panel">
            <summary>
            Background visible attributes.
            </summary>
        </member>
        <member name="P:Steema.TeeChart.TChart.Printer">
            <summary>
            Printing related properties.
            </summary>
        </member>
        <member name="P:Steema.TeeChart.TChart.Page">
            <summary>
            Accesses multiple page characteristics of the Chart.
            </summary>
        </member>
        <member name="P:Steema.TeeChart.TChart.Legend">
            <summary>Legend characteristics</summary>
        </member>
        <member name="P:Steema.TeeChart.TChart.Header">
            <summary>
            Defines Text shown at top of the Chart.
            </summary>
        </member>
        <member name="P:Steema.TeeChart.TChart.SubHeader">
            <summary>
            Defines Text shown directly below Header.
            </summary>
        </member>
        <member name="P:Steema.TeeChart.TChart.Font">
            <summary>
            Determines Font characteristics.
            </summary>
        </member>
        <member name="P:Steema.TeeChart.TChart.ForeColor">
            <summary>
            Gets the foreground color of the TChart object.
            </summary>
        </member>
        <member name="P:Steema.TeeChart.TChart.Footer">
            <summary>
            Defines Text shown at the bottom of the Chart.
            </summary>
        </member>
        <member name="P:Steema.TeeChart.TChart.Zoom">
            <summary>
            Accesses the Zoom characteristics of the Chart.
            </summary>
        </member>
        <member name="P:Steema.TeeChart.TChart.Panning">
            <summary>
            Accesses Panning characteristics.
            </summary>
        </member>
        <member name="P:Steema.TeeChart.TChart.SubFooter">
            <summary>
            Defines Text shown directly above Footer.
            </summary>
        </member>
        <member name="P:Steema.TeeChart.TChart.Aspect">
            <summary>
            Accesses view characteristics of the Chart.
            </summary>
        </member>
        <member name="P:Steema.TeeChart.TChart.Canvas">
             <summary>
            
             </summary>
        </member>
        <member name="P:Steema.TeeChart.TChart.Graphics3D">
            <summary>
            Use the Graphics3D property to access TeeChart Draw properties and methods.
            </summary>
        </member>
        <member name="P:Steema.TeeChart.TChart.Series">
            <summary>
            Collection of Series contained in this Chart.
            </summary>
        </member>
        <member name="P:Steema.TeeChart.TChart.Tools">
            <summary>
            Collection of Tool components contained in this Chart.
            </summary>
        </member>
        <member name="P:Steema.TeeChart.TChart.Animations">
            <summary>
            Collection of Animation components contained in this Chart.
            </summary>
        </member>
        <member name="P:Steema.TeeChart.TChart.Walls">
            <summary>
            Accesses left, bottom and back wall characteristics of the Chart.
            </summary>
        </member>
        <member name="P:Steema.TeeChart.TChart.Axes">
            <summary>
            Collection of predefined and custom axis objects.
            </summary>
        </member>
        <member name="P:Steema.TeeChart.TChart.Export">
            <summary>
            Accesses Chart export properties and methods.
            </summary>
        </member>
        <member name="P:Steema.TeeChart.TChart.Import">
            <summary>
            Accesses Chart import properties and methods.
            </summary>
        </member>
        <member name="P:Steema.TeeChart.TChart.Item(System.Int32)">
            <summary>
            Default indexer ( Example: tChart1[0].Color=Color.Blue; is equivalent to tChart1.Series[0].Color=Color.Blue; )
            </summary>
        </member>
        <member name="T:Steema.TeeChart.TChart.AllowScrollEventArgs">
            <summary>
            Event arguments class used by AllowScroll chart event.
            </summary>
        </member>
        <member name="T:Steema.TeeChart.TChart.SeriesEventHandler">
            <summary>Common Series event handler</summary>
        </member>
        <member name="T:Steema.TeeChart.TChart.AllowScrollEventHandler">
            <summary>Scroll event handler</summary>
        </member>
        <member name="F:Steema.TeeChart.GalleryPanel.GalleryChart.GalleryColor">
            <summary>
            The color used to change selected Chart's Gradient.
            </summary>
        </member>
        <member name="M:Steema.TeeChart.GalleryPanel.GalleryChart.#ctor(System.Drawing.Drawing2D.SmoothingMode)">
            <summary>
            Creates a new Gallery dialog.
            </summary>
            <param name="smooth">True to show anti-aliased charts at gallery</param>
        </member>
        <member name="T:Steema.TeeChart.GalleryPanel.GalleryChartCollection">
            <summary>
            Internal use. Lists Gallery Charts
            </summary>
        </member>
        <member name="T:Steema.TeeChart.Editors.CLVFunctionEditor">
            <summary>
            Summary description for CLVFunctionEditor.
            </summary>
        </member>
        <member name="F:Steema.TeeChart.Editors.CLVFunctionEditor.components">
            <summary>
            Required designer variable.
            </summary>
        </member>
        <member name="M:Steema.TeeChart.Editors.CLVFunctionEditor.Dispose(System.Boolean)">
            <summary>
            Clean up any resources being used.
            </summary>
        </member>
        <member name="M:Steema.TeeChart.Editors.CLVFunctionEditor.InitializeComponent">
            <summary>
            Required method for Designer support - do not modify
            the contents of this method with the code editor.
            </summary>
        </member>
        <member name="T:Steema.TeeChart.Editors.CCIFunctionEditor">
            <summary>
            Summary description for CCIFunctionEditor.
            </summary>
        </member>
        <member name="F:Steema.TeeChart.Editors.CCIFunctionEditor.components">
            <summary>
            Required designer variable.
            </summary>
        </member>
        <member name="M:Steema.TeeChart.Editors.CCIFunctionEditor.Dispose(System.Boolean)">
            <summary>
            Clean up any resources being used.
            </summary>
        </member>
        <member name="M:Steema.TeeChart.Editors.CCIFunctionEditor.InitializeComponent">
            <summary>
            Required method for Designer support - do not modify
            the contents of this method with the code editor.
            </summary>
        </member>
        <member name="T:Steema.TeeChart.Editors.DesignTimeOptions">
            <summary>
            Summary description for DesignTimeOptions.
            </summary>
        </member>
        <member name="F:Steema.TeeChart.Editors.DesignTimeOptions.components">
            <summary>
            Required designer variable.
            </summary>
        </member>
        <member name="M:Steema.TeeChart.Editors.DesignTimeOptions.Dispose(System.Boolean)">
            <summary>
            Clean up any resources being used.
            </summary>
        </member>
        <member name="M:Steema.TeeChart.Editors.DesignTimeOptions.InitializeComponent">
            <summary>
            Required method for Designer support - do not modify
            the contents of this method with the code editor.
            </summary>
        </member>
        <!-- Badly formed XML comment ignored for member "T:Steema.TeeChart.ButtonPen" -->
        <member name="F:Steema.TeeChart.Editors.Tools.SubChartEditor.components">
            <summary>
            Required designer variable.
            </summary>
        </member>
        <member name="M:Steema.TeeChart.Editors.Tools.SubChartEditor.Dispose(System.Boolean)">
            <summary>
            Clean up any resources being used.
            </summary>
            <param name="disposing">true if managed resources should be disposed; otherwise, false.</param>
        </member>
        <member name="M:Steema.TeeChart.Editors.Tools.SubChartEditor.InitializeComponent">
            <summary>
            Required method for Designer support - do not modify
            the contents of this method with the code editor.
            </summary>
        </member>
        <member name="T:Steema.TeeChart.Drawing.Graphics3DVec">
            <summary>
            Abstract class for all vector image formats. Key elements are internal bitmap and UseBuffered = false
            </summary>
        </member>
        <member name="M:Steema.TeeChart.Drawing.Graphics3D.ApplyDark(System.Drawing.Color@,System.Byte)">
            <summary>
            Converts the Color parameter to a darker color.
            </summary>
        </member>
        <member name="M:Steema.TeeChart.Drawing.Graphics3D.ApplyBright(System.Drawing.Color@,System.Byte)">
            <summary>
            Converts the Color parameter to a brighter color.
            </summary>
        </member>
        <member name="M:Steema.TeeChart.Drawing.Graphics3D.PointInLineTolerance(System.Drawing.Point,System.Int32,System.Int32,System.Int32,System.Int32,System.Int32)">
            <summary>
            Determines if point T is "near" line segment between Point1 and Point2.
            </summary>
        </member>
        <member name="M:Steema.TeeChart.Drawing.Graphics3D.GetDefaultPattern(System.Int32)">
            <summary>
            Returns a valid Windows Brush Style from an internal palette of many possible Brush styles. 
            </summary>
        </member>
        <member name="M:Steema.TeeChart.Drawing.Graphics3D.RectFromPolygon(System.Int32,System.Drawing.Point[])">
            <summary>
            Returns the bounding rectangle for a given array of XY points.
            </summary>
        </member>
        <member name="M:Steema.TeeChart.Drawing.Graphics3D.RectFromPolygon(System.Int32,Steema.TeeChart.Drawing.PointDouble[])">
            <summary>
            Returns the bounding rectangle for a given array of XY points.
            </summary>
        </member>
        <member name="M:Steema.TeeChart.Drawing.Graphics3D.PointInTriangle(System.Drawing.Point,System.Drawing.Point,System.Drawing.Point,System.Drawing.Point)">
            <summary>
            Returns true if point P is inside the vert triangle of p0, p1, p2.
            </summary>
        </member>
        <member name="M:Steema.TeeChart.Drawing.Graphics3D.PointInTriangle(System.Drawing.Point,System.Int32,System.Int32,System.Int32,System.Int32)">
            <summary>
            Returns true if point P is inside the vert triangle of x0y0, midxY1, x1y0.
            </summary>
        </member>
        <member name="M:Steema.TeeChart.Drawing.Graphics3D.PointInHorizTriangle(System.Drawing.Point,System.Int32,System.Int32,System.Int32,System.Int32)">
            <summary>
            Returns true if point P is inside the horizontal triangle.
            </summary>
        </member>
        <member name="M:Steema.TeeChart.Drawing.Graphics3D.PointInEllipse(System.Drawing.Point,System.Int32,System.Int32,System.Int32,System.Int32)">
            <summary>
            Returns true if point P is inside the ellipse bounded by Left, Top, Right, Bottom.
            </summary>
        </member>
        <member name="M:Steema.TeeChart.Drawing.Graphics3D.PointInEllipse(System.Drawing.Point,System.Drawing.Rectangle)">
            <summary>
            Returns true if point P is inside the ellipse bounded by Rect.
            </summary>
        </member>
        <member name="M:Steema.TeeChart.Drawing.Graphics3D.PointInPolygon(System.Drawing.Point,System.Drawing.Point[])">
            <summary>
            Returns true if point P is inside Poly polygon. 
            </summary>
        </member>
        <member name="M:Steema.TeeChart.Drawing.Graphics3D.PointInPolygon(System.Drawing.Point,Steema.TeeChart.Drawing.PointDouble[])">
            <summary>
            Returns true if point P is inside Poly polygon. 
            </summary>
        </member>
        <member name="M:Steema.TeeChart.Drawing.Graphics3D.PointAtDistance(System.Drawing.Point,System.Drawing.Point,System.Int32)">
            <summary>
            Returns point "To" minus "distance" pixels from "From" point.
            </summary>
        </member>
        <member name="M:Steema.TeeChart.Drawing.Graphics3D.Calculate3DPosition(Steema.TeeChart.Drawing.Point3D)">
            <summary>
            Calculates and returns the XY position in pixels of the XYZ 3D coordinate.
            </summary>
        </member>
        <member name="M:Steema.TeeChart.Drawing.Graphics3D.Calculate3DPosition(System.Int32,System.Int32,System.Int32)">
            <summary>
            Calculates and returns the XY position in pixels of the XYZ 3D coordinate.
            </summary>
        </member>
        <member name="M:Steema.TeeChart.Drawing.Graphics3D.Calculate3DPosition(System.Drawing.Point,System.Int32)">
            <summary>
            Calculates and returns the XY position in pixels of the XYZ 3D coordinate.
            </summary>
        </member>
        <member name="M:Steema.TeeChart.Drawing.Graphics3D.Calculate2DPosition(System.Int32@,System.Int32@,System.Int32)">
            <summary>
            Calculates and returns the XY position in pixels of the coordinate.
            </summary>
        </member>
        <member name="M:Steema.TeeChart.Drawing.Graphics3D.Calc3DPos(System.Drawing.Point@,System.Int32,System.Int32,System.Int32)">
            <summary>
            Calculates and returns the XY position in pixels of the point p, XYZ 3D coordinate.
            </summary>
        </member>
        <member name="M:Steema.TeeChart.Drawing.Graphics3D.Calc3DPos(System.Drawing.Point@,System.Drawing.Point,System.Int32)">
            <summary>
            Calculates and returns the XY position in pixels of the point p Z 3D coordinate.
            </summary>
        </member>
        <member name="M:Steema.TeeChart.Drawing.Graphics3D.PointFromCircle(System.Drawing.Rectangle,System.Double)">
            <summary>
            Returns the PointDouble which is on the circle bounded by rectBounds at the angle degrees.
            </summary>
        </member>
        <member name="M:Steema.TeeChart.Drawing.Graphics3D.PointFromCircle(System.Drawing.Rectangle,System.Double,System.Int32)">
            <summary>
            Returns the PointDouble which is on the circle bounded by rectBounds at the angle degrees.
            </summary>
        </member>
        <member name="M:Steema.TeeChart.Drawing.Graphics3D.PointFromCircle(System.Drawing.Rectangle,System.Double,System.Int32,System.Boolean)">
            <summary>
            Returns the PointDouble which is on the circle bounded by rectBounds at the angle degrees.
            Optionally translates the point in TeeChart's 3D space when the Z Position is greater than zero.
            </summary>
        </member>
        <member name="M:Steema.TeeChart.Drawing.Graphics3D.PointFromEllipse(System.Drawing.Rectangle,System.Double)">
            <summary>
            Returns the PointDouble which is on the ellipse bounded by rectBounds at the angle degrees.
            </summary>
        </member>
        <member name="M:Steema.TeeChart.Drawing.Graphics3D.PointFromEllipse(System.Drawing.Rectangle,System.Double,System.Int32)">
            <summary>
            Returns the PointDouble which is on the ellipse bounded by rectBounds at the angle degrees.
            Optionally translates the point in TeeChart's 3D space when the Z Position is greater than zero.
            </summary>
        </member>
        <member name="M:Steema.TeeChart.Drawing.Graphics3D.Calc3DPos(System.Int32@,System.Int32@,System.Int32)">
            <summary>
            Calculates and returns the XY position in pixels of the XYZ 3D coordinate.
            </summary>
        </member>
        <member name="M:Steema.TeeChart.Drawing.Graphics3D.TransparentColor(System.Int32,System.Drawing.Color)">
            <summary>
            Returns Color parameter after changing its "A" value.
            </summary>
            <param name="transparency">From 0 to 100</param>
            <param name="color">A Color</param>
            <returns>Color with transparency percentage applied.</returns>
        </member>
        <member name="M:Steema.TeeChart.Drawing.Graphics3D.Transparency(System.Drawing.Color)">
            <summary>
            Returns percentage based on Color "A" value.
            </summary>
            <returns>Percentage from 0 to 100%</returns>
        </member>
        <member name="M:Steema.TeeChart.Drawing.Graphics3D.CalcRect3D(System.Drawing.RectangleF,System.Int32)">
            <summary>
            Calculates and returns the position in pixels of the Rectangle 3D coordinates.
            </summary>
        </member>
        <member name="M:Steema.TeeChart.Drawing.Graphics3D.CalcRect3D(System.Drawing.Rectangle,System.Int32)">
            <summary>
            Calculates and returns the position in pixels of the Rectangle 3D coordinates.
            </summary>
        </member>
        <member name="M:Steema.TeeChart.Drawing.Graphics3D.FourPointsFromRect(System.Drawing.Rectangle,System.Int32)">
            <summary>
            Returns a TFourPoints structure (array of four TPoint records)
            </summary>
        </member>
        <member name="M:Steema.TeeChart.Drawing.Graphics3D.RectFromRectZ(System.Drawing.Rectangle,System.Int32)">
            <summary>
            Returns the smallest bounding rectangle containing the four corners of the "R" rectangle after calculating their 3D position.
            </summary>
        </member>
        <member name="M:Steema.TeeChart.Drawing.Graphics3D.StartBlending(System.Double)">
            <summary>
            Supports OpenGL Transparency
            </summary>
            <param name="transparency">%</param>
        </member>
        <member name="M:Steema.TeeChart.Drawing.Graphics3D.EndBlending">
            <summary>
            Supports OpenGL Transparency
            </summary>
        </member>
        <member name="M:Steema.TeeChart.Drawing.Graphics3D.MoveTo(System.Int32,System.Int32)">
            <summary>
            Sets the value of PenPos to x and y co-ordinates  before calling LineTo.
            </summary>
        </member>
        <member name="M:Steema.TeeChart.Drawing.Graphics3D.MoveTo(System.Drawing.Point)">
            <summary>
            Sets the value of PenPos to Point p before calling LineTo.
            </summary>
        </member>
        <member name="M:Steema.TeeChart.Drawing.Graphics3D.MoveTo(System.Int32,System.Int32,System.Int32)">
            <summary>
            Sets the value of PenPos to x, y and z co-ordinates before calling LineTo.
            </summary>
        </member>
        <member name="M:Steema.TeeChart.Drawing.Graphics3D.MoveTo(System.Drawing.Point,System.Int32)">
            <summary>
            Sets the value of PenPos to Point p  with z depth offset before calling LineTo.
            </summary>
        </member>
        <member name="M:Steema.TeeChart.Drawing.Graphics3D.MoveTo(Steema.TeeChart.Drawing.Point3D)">
            <summary>
            Sets the value of PenPos  to 3D Point p before calling LineTo.
            </summary>
        </member>
        <member name="M:Steema.TeeChart.Drawing.Graphics3D.LineTo(System.Drawing.Point,System.Int32)">
            <summary>
            Draws a line to Point with z depth offset.
            </summary>
        </member>
        <member name="M:Steema.TeeChart.Drawing.Graphics3D.LineTo(System.Int32,System.Int32,System.Int32)">
            <summary>
            Draws line from present position to end co-ordinates with z depth offset.
            </summary>
        </member>
        <member name="M:Steema.TeeChart.Drawing.Graphics3D.LineTo(Steema.TeeChart.Drawing.Point3D)">
            <summary>
            Draws a Line to 3D Point.
            </summary>
        </member>
        <member name="M:Steema.TeeChart.Drawing.Graphics3D.Line(System.Drawing.Point,System.Drawing.Point,System.Int32)">
            <summary>
            Draws a Line between point p0 and point p1 with Z offset.
            </summary>
            <param name="p0">Origin xy</param>
            <param name="p1">Destination xy</param>
            <param name="z">Depth offset</param>
        </member>
        <member name="M:Steema.TeeChart.Drawing.Graphics3D.Line(Steema.TeeChart.Drawing.PointDouble,Steema.TeeChart.Drawing.PointDouble)">
            <summary>
            Draws a Line between PointDouble p0 and PointDouble p1.
            </summary>
            <param name="p0">Origin xy</param>
            <param name="p1">Destination xy</param>
        </member>
        <member name="M:Steema.TeeChart.Drawing.Graphics3D.Line(System.Drawing.Point,System.Drawing.Point)">
            <summary>
            Draws a Line between point p0 and point p1.
            </summary>
            <param name="p0">Origin xy</param>
            <param name="p1">Destination xy</param>
        </member>
        <member name="M:Steema.TeeChart.Drawing.Graphics3D.Line(System.Int32,System.Int32,System.Int32,System.Int32,System.Int32,System.Int32)">
            <summary>
            Draws a Line between co-ordinates with different start/end z depth offset.
            </summary>
        </member>
        <member name="M:Steema.TeeChart.Drawing.Graphics3D.Line(System.Int32,System.Int32,System.Int32,System.Int32,System.Int32)">
            <summary>
            Draws a Line between co-ordinates with z depth offset.
            </summary>
        </member>
        <member name="M:Steema.TeeChart.Drawing.Graphics3D.VerticalLine(System.Int32,System.Int32,System.Int32,System.Int32)">
            <summary>
            Draws a Vertical Line from (X,Top) to (X,Bottom) at z depth position.
            </summary>
        </member>
        <member name="M:Steema.TeeChart.Drawing.Graphics3D.Pie(System.Int32,System.Int32,System.Int32,System.Int32,System.Int32,System.Int32,System.Double,System.Double,System.Boolean,System.Boolean,System.Int32,System.Int32,Steema.TeeChart.Drawing.EdgeStyles)">
            <summary>
            Draws a 3D Pie slice using start Angle and end Angle and donut percent.
            </summary>
        </member>
        <member name="M:Steema.TeeChart.Drawing.Graphics3D.Arc(System.Int32,System.Int32,System.Int32,System.Int32,System.Int32,System.Int32,System.Int32,System.Int32)">
            <summary>
            Draws an arc in the rectangle defined by the 4 co-ordinates.
            </summary>
        </member>
        <member name="M:Steema.TeeChart.Drawing.Graphics3D.Ellipse(System.Drawing.Rectangle)">
            <summary>
            Ellipse bounding Rectangle r.
            </summary>
        </member>
        <member name="M:Steema.TeeChart.Drawing.Graphics3D.Ellipse(System.Drawing.Rectangle,System.Int32)">
            <summary>
            Ellipse bounding Rectangle at z depth.
            </summary>
        </member>
        <member name="M:Steema.TeeChart.Drawing.Graphics3D.Ellipse(System.Int32,System.Int32,System.Int32,System.Int32,System.Int32)">
            <summary>
            Ellipse bounding Rect (X1,Y1,X2,Y2) at Z position.
            </summary>
        </member>
        <member name="M:Steema.TeeChart.Drawing.Graphics3D.Ellipse(System.Drawing.Rectangle,System.Int32,System.Double)">
            <summary>
            Ellipse bounding rectangle r with Z offset at angle.
            </summary>
        </member>
        <member name="M:Steema.TeeChart.Drawing.Graphics3D.GetChartPolygon(System.Drawing.Rectangle,System.Int32,System.Int32)">
             <summary>
            Returns a z-shifted Region from a Rectangle. 
             </summary>
        </member>
        <member name="M:Steema.TeeChart.Drawing.Graphics3D.EllipseEnh(System.Int32,System.Int32,System.Int32,System.Int32,System.Int32)">
            <summary>
            Enhanced Ellipse bounding Rect (X1,Y1,X2,Y2) at Z position.
            </summary>
        </member>
        <member name="M:Steema.TeeChart.Drawing.Graphics3D.EllipseEnh(System.Int32,System.Int32,System.Int32,System.Int32)">
            <summary>
            Internal use. Enhanced spheres
            </summary>
        </member>
        <member name="M:Steema.TeeChart.Drawing.Graphics3D.SphereEnh(System.Int32,System.Int32,System.Int32,System.Int32)">
            <summary>
            Internal use. 3D spheres
            </summary>
        </member>
        <member name="M:Steema.TeeChart.Drawing.Graphics3D.Plane(System.Drawing.Point,System.Drawing.Point,System.Drawing.Point,System.Drawing.Point,System.Int32)">
            <summary>
            Draws a polygon (Point p1, Point p2, Point p3, Point p4) at Z depth offset.
            </summary>
        </member>
        <member name="M:Steema.TeeChart.Drawing.Graphics3D.Plane(System.Drawing.Point,System.Drawing.Point,System.Int32,System.Int32)">
            <summary>
            Draws a polygon (Point p1, Point p2) at Z depth offset.
            </summary>
        </member>
        <member name="M:Steema.TeeChart.Drawing.Graphics3D.Plane(System.Int32,System.Int32,System.Drawing.Point[])">
            <summary>
            Draws a polygon using points array p with different start/end z depth offset.
            </summary>
        </member>
        <member name="M:Steema.TeeChart.Drawing.Graphics3D.TextOut(System.Int32,System.Int32,System.String)">
            <summary>
            Displays 2D non-rotated label at the specified x and y screen coordinates.
            </summary>
        </member>
        <member name="M:Steema.TeeChart.Drawing.Graphics3D.TextOut(Steema.TeeChart.Drawing.ChartFont,System.Int32,System.Int32,System.String)">
            <summary>
            Displays 2D non-rotated label (in ChartFont f) at the specified x and y screen coordinates.
            </summary>
        </member>
        <member name="M:Steema.TeeChart.Drawing.Graphics3D.TextOut(System.Int32,System.Int32,System.Int32,System.String)">
            <summary>
            Displays 2D non-rotated label at the specified x,y and z screen coordinates.
            </summary>
        </member>
        <member name="M:Steema.TeeChart.Drawing.Graphics3D.GetClipRoundRectangle(System.Drawing.Rectangle,System.Int32,System.Int32,System.Int32)">
             <summary>
            Returns a PointDouble array which contains a Rounded Rectangle. 
             </summary>
        </member>
        <member name="M:Steema.TeeChart.Drawing.Graphics3D.GetClipRoundRectangle(System.Byte[]@,System.Drawing.Rectangle,System.Int32,System.Int32,System.Int32)">
             <summary>
            Returns a PointDouble array which contains a Rounded Rectangle. 
             </summary>
        </member>
        <member name="M:Steema.TeeChart.Drawing.Graphics3D.GetClipRoundRectangle(System.Drawing.Rectangle,System.Int32,System.Int32)">
             <summary>
            Returns a PointDouble array which contains a Rounded Rectangle. 
             </summary>
        </member>
        <member name="M:Steema.TeeChart.Drawing.Graphics3D.RoundRectangle(System.Drawing.Rectangle)">
            <summary>
            Draws a rectangle with rounded corners.
            </summary>
        </member>
        <member name="M:Steema.TeeChart.Drawing.Graphics3D.OrientRectangle(System.Drawing.Rectangle@)">
            <summary>
            Makes sure the R rectangle Left is smaller than Right and Top is smaller than Bottom. 
            Returns corrected rectangle.
            </summary>
        </member>
        <member name="M:Steema.TeeChart.Drawing.Graphics3D.CalcArcAngles(System.Int32,System.Int32,System.Int32,System.Int32,System.Int32,System.Int32,System.Int32,System.Int32,System.Double@,System.Double@)">
            <summary>
            Use arc x1,y1..x4,y4 points to extract arc start and sweep angles.
            </summary>
        </member>
        <member name="M:Steema.TeeChart.Drawing.Graphics3D.CalcArcPoints(System.Int32,System.Int32,System.Int32,System.Int32,System.Double,System.Double,System.Int32@,System.Int32@,System.Int32@,System.Int32@)">
            <summary>
            Use x1,y1; x2,y2; start and sweep angles to extract arc x3,y3 and x4,y4 points.
            </summary>
        </member>
        <member name="M:Steema.TeeChart.Drawing.Graphics3D.Projection(System.Int32,System.Drawing.Rectangle,System.Drawing.Rectangle)">
            <summary>
            Internal use. Calculates the projection co-ordinates for rectangle Bounds
            </summary>
            <param name="maxDepth">Max shape depth</param>
            <param name="r">Projected shape rectangle</param>
        </member>
        <member name="M:Steema.TeeChart.Drawing.Graphics3D.Pyramid(System.Boolean,System.Drawing.Rectangle,System.Int32,System.Int32,System.Boolean)">
            <summary>
            Draws a vertical or horizontal Pyramid with optional dark shaded sides.
            </summary>
        </member>
        <member name="M:Steema.TeeChart.Drawing.Graphics3D.Pyramid(System.Boolean,System.Int32,System.Int32,System.Int32,System.Int32,System.Int32,System.Int32,System.Boolean)">
            <summary>
            Draws a vertical or horizontal Pyramid with optional dark shaded sides.
            </summary> 
        </member>
        <member name="M:Steema.TeeChart.Drawing.Graphics3D.PlaneFour3D(System.Int32,System.Int32,System.Drawing.Point[])">
            <summary>
            Draws a polygon of  four points.
            </summary>
        </member>
        <member name="M:Steema.TeeChart.Drawing.Graphics3D.FontTextHeight(Steema.TeeChart.Drawing.ChartFont)">
            <summary>
            Determines the Font Height to be used for outputted text when using the Drawing.
            </summary>
        </member>
        <member name="M:Steema.TeeChart.Drawing.Graphics3D.RectangleZ(System.Int32,System.Int32,System.Int32,System.Int32,System.Int32)">
            <summary>
            Horizontal Rectangle from Left to Right, from Z0 to Z1 position, 
            at Top Y.
            </summary>
        </member>
        <member name="M:Steema.TeeChart.Drawing.Graphics3D.RectangleY(System.Int32,System.Int32,System.Int32,System.Int32,System.Int32)">
            <summary>
            Horizontal Rectangle from Left to Right, from Z0 to Z1 position, at Top Y.
            </summary>
        </member>
        <member name="M:Steema.TeeChart.Drawing.Graphics3D.Rectangle(System.Int32,System.Int32,System.Int32,System.Int32,System.Int32)">
            <summary>
            Draws a rectangle between the defined co-ordinates with z depth.
            </summary>
        </member>
        <member name="M:Steema.TeeChart.Drawing.Graphics3D.Rectangle(System.Drawing.Rectangle,System.Int32)">
            <summary>
            Draws a Rectangle (Rectangle r) at z depth.
            </summary>
        </member>
        <member name="M:Steema.TeeChart.Drawing.Graphics3D.Polygon(System.Int32,System.Drawing.Point[])">
            <summary>
            Draws a polygon with z position offset.
            </summary>
        </member>
        <member name="M:Steema.TeeChart.Drawing.Graphics3D.Cone(System.Boolean,System.Int32,System.Int32,System.Int32,System.Int32,System.Int32,System.Int32,System.Boolean)">
            <summary>
            Paints a cone. Use ONLY with OPENGL.
            </summary>
        </member>
        <member name="M:Steema.TeeChart.Drawing.Graphics3D.HorizCone(System.Drawing.Rectangle,System.Int32,System.Int32,System.Boolean,System.Int32)">
            <summary>
            Paints a cone. Use ONLY with OPENGL.
            </summary>
        </member>
        <member name="M:Steema.TeeChart.Drawing.Graphics3D.Cone(System.Boolean,System.Drawing.Rectangle,System.Int32,System.Int32,System.Boolean)">
            <summary>
            Paints a cone. Use ONLY with OPENGL.
            </summary>
        </member>
        <member name="M:Steema.TeeChart.Drawing.Graphics3D.Cone(System.Boolean,System.Drawing.Rectangle,System.Int32,System.Int32,System.Boolean,System.Int32)">
            <summary>
            Paints a cone with Cone Percent . Use ONLY with OPENGL.
            </summary>
        </member>
        <member name="M:Steema.TeeChart.Drawing.Graphics3D.QuickSortAngle(System.Drawing.Point[]@,System.Double[]@,System.Int32,System.Int32)">
            <summary>
            Sort an array of points by angles.
            </summary>
            <param name="p"></param>
            <param name="angles"></param>
            <param name="low"></param>
            <param name="high"></param>
        </member>
        <member name="M:Steema.TeeChart.Drawing.Graphics3D.ConvexHull(System.Drawing.Point[]@,System.Int32@)">
            <summary>
            Calculates the boundary points of the convex hull of a set of 2D xy points. Original
            </summary>
        </member>
        <member name="M:Steema.TeeChart.Drawing.Graphics3D.Cylinder(System.Boolean,System.Drawing.Rectangle,System.Int32,System.Int32,System.Boolean)">
            <summary>
            Draws cylinder toggle Boolean for vertical or horizontal cylinder.
            </summary>
        </member>
        <member name="M:Steema.TeeChart.Drawing.Graphics3D.CrossingLines(System.Double,System.Double,System.Double,System.Double,System.Double,System.Double,System.Double,System.Double,System.Double@,System.Double@)">
            <summary>
            Returns true if two lines cross.
            </summary>
        </member>
        <member name="M:Steema.TeeChart.Drawing.Graphics3D.Cube(System.Drawing.Rectangle,System.Int32,System.Int32)">
            <summary>
            Draws a Cube.
            </summary>
        </member>
        <member name="M:Steema.TeeChart.Drawing.Graphics3D.Cube(System.Drawing.Rectangle,System.Int32,System.Int32,System.Boolean)">
            <summary>
            Draws a Cube with Dark Sides.
            </summary>
        </member>
        <member name="M:Steema.TeeChart.Drawing.Graphics3D.Cube(System.Int32,System.Int32,System.Int32,System.Int32,System.Int32,System.Int32,System.Boolean)">
            <summary>
            Draws a Cube with Dark Sides.
            </summary>
        </member>
        <member name="M:Steema.TeeChart.Drawing.Graphics3D.Arrow(System.Boolean,System.Drawing.Point,System.Drawing.Point,System.Int32,System.Int32,System.Int32)">
            <summary>
            Draws a line with an arrow head of ArrowWidth and ArrowHeight dimensions in pixels.
            </summary>
        </member>
        <member name="M:Steema.TeeChart.Drawing.Graphics3D.TextHeight(Steema.TeeChart.Drawing.ChartFont,System.String)">
            <summary>
            Returns the vertical text size in pixels of ChartFont f.
            </summary>
            <returns>Height in pixels of ChartFont f. </returns>
        </member>
        <member name="M:Steema.TeeChart.Drawing.Graphics3D.TextWidth(Steema.TeeChart.Drawing.ChartFont,System.String)">
            <summary>
            Returns the horizontal text size in pixels of ChartFont f.
            </summary>
        </member>
        <member name="M:Steema.TeeChart.Drawing.Graphics3D.TextHeight(System.String)">
            <summary>
            Returns the vertical size in pixels of the text string.
            </summary>
            <returns>Height in pixels of the text string.</returns>
        </member>
        <member name="M:Steema.TeeChart.Drawing.Graphics3D.TextWidth(System.String)">
            <summary>
            Returns the horizontal size in pixels of the text string.
            </summary>
        </member>
        <member name="M:Steema.TeeChart.Drawing.Graphics3D.Triangle(System.Drawing.Point,System.Drawing.Point,System.Drawing.Point,System.Int32)">
            <summary>
            Draws a triangle (point p0, pointp1, pointp2) at Z position.
            </summary>
        </member>
        <member name="M:Steema.TeeChart.Drawing.Graphics3D.Triangle(Steema.TeeChart.Drawing.Triangle3D)">
            <summary>
            Draws a triangle (Triangle3D p).
            </summary>
        </member>
        <member name="M:Steema.TeeChart.Drawing.Graphics3D.MeasureString(Steema.TeeChart.Drawing.ChartFont,System.String)">
             <summary>
            Returns the SizeF of a string of a specified font. 
             </summary>
        </member>
        <member name="M:Steema.TeeChart.Drawing.Graphics3D.ZLine(System.Int32,System.Int32,System.Int32,System.Int32)">
            <summary>
            Draws a Line from (X,Y,Z0) to (X,Y,Z1).
            </summary>
        </member>
        <member name="M:Steema.TeeChart.Drawing.Graphics3D.DrawBeziers(System.Int32,System.Drawing.Point[])">
            <summary>
            Draws Bézier splines for the Point array p at displacement z
            </summary>
        </member>
        <member name="M:Steema.TeeChart.Drawing.Graphics3D.RotateLabel(System.Int32,System.Int32,System.Int32,System.String,System.Double)">
            <summary>
            Draws a rotated text string at the specified x,y and z coordinates with the RotDegree rotation angle.
            </summary>
        </member>
        <member name="M:Steema.TeeChart.Drawing.Graphics3D.Pie(System.Int32,System.Int32,System.Int32,System.Int32,System.Int32,System.Int32,System.Int32,System.Int32)">
            <summary>
            Draws a Pie slice.
            </summary>
        </member>
        <member name="M:Steema.TeeChart.Drawing.Graphics3D.Pie(System.Int32,System.Int32,System.Int32,System.Int32,System.Double,System.Double)">
            <summary>
            Draws a Pie slice using StartAngle and End Angle.
            </summary>
        </member>
        <member name="M:Steema.TeeChart.Drawing.Graphics3D.HorizontalLine(System.Int32,System.Int32,System.Int32,System.Int32)">
            <summary>
            Draws a Horizontal at z depth position.
            </summary>
        </member>
        <member name="M:Steema.TeeChart.Drawing.Graphics3D.PolygonPointBounds(System.Drawing.Point[])">
            <summary>
            Returns a parallelogram of upper-left, upper-right, and lower-left corners.
            </summary>
        </member>
        <member name="M:Steema.TeeChart.Drawing.Graphics3D.PolygonBounds(System.Drawing.Point[])">
            <summary>
            Returns the minimum left / top and the
            maximum right / bottom for all the points in "p" polygon
            </summary>
        </member>
        <member name="M:Steema.TeeChart.Drawing.Graphics3D.PolygonRect(System.Drawing.PointF[])">
            <summary>
            Returns bounding rectangle for point array p
            </summary>
        </member>
        <member name="M:Steema.TeeChart.Drawing.Graphics3D.PolygonRect(System.Drawing.Point[])">
            <summary>
            Returns bounding rectangle for point array p
            </summary>
        </member>
        <member name="M:Steema.TeeChart.Drawing.Graphics3D.Sphere(System.Int32,System.Int32,System.Int32,System.Double)">
            <summary>
            Draws a sphere.
            </summary>
        </member>
        <member name="M:Steema.TeeChart.Drawing.Graphics3D.Rectangle(System.Int32,System.Int32,System.Int32,System.Int32)">
            <summary>
            Draws a rectangle between the defined co-ordinates.
            </summary>
        </member>
        <member name="M:Steema.TeeChart.Drawing.Graphics3D.Ellipse(System.Int32,System.Int32,System.Int32,System.Int32,System.Int32,System.Double)">
            <summary>
            Ellipse bounding rectangle (Left, Top, Right, Bottom) with Z offset at angle.
            </summary>
        </member>
        <member name="M:Steema.TeeChart.Drawing.Graphics3D.ClipRectangle(System.Int32,System.Int32,System.Int32,System.Int32)">
            <summary>
            Creates a Windows GDI clipping region and selects it into TChart.Canvas device context handle.
            </summary>
        </member>
        <member name="M:Steema.TeeChart.Drawing.Graphics3D.UnClipRectangle">
            <summary>
            Removes any clipping region applied to Chart Drawing.
            </summary>
        </member>
        <member name="M:Steema.TeeChart.Drawing.Graphics3D.PyramidTrunc(System.Drawing.Rectangle,System.Int32,System.Int32,System.Int32,System.Int32)">
            <summary>
            Draws a pyramid with a truncated apex of variable thickness.
            </summary> 
        </member>
        <member name="M:Steema.TeeChart.Drawing.Graphics3D.ClipCube(System.Drawing.Rectangle,System.Int32,System.Int32)">
            <summary>
            Creates a cubic Windows GDI clipping region.
            </summary>
        </member>
        <member name="M:Steema.TeeChart.Drawing.Graphics3D.DrawPath(System.Drawing.Pen,System.Drawing.Drawing2D.GraphicsPath)">
            <summary>
            Draws a GraphicsPath. 
            </summary>
            <param name="pen">Pen that determines the color, width, and style of the path. </param>
            <param name="path">GraphicsPath to draw.</param>
        </member>
        <member name="M:Steema.TeeChart.Drawing.Graphics3D.Draw(System.Drawing.Rectangle,System.Drawing.Image,Steema.TeeChart.Drawing.ImageMode,System.Boolean)">
            <summary>
            Paints the image in rectangle r.
            </summary>
        </member>
        <member name="M:Steema.TeeChart.Drawing.Graphics3D.DrawBeziers(System.Drawing.Point[])">
            <summary>
            Draws Bézier splines for the Point array p
            </summary>
        </member>
        <member name="M:Steema.TeeChart.Drawing.Graphics3D.PrepareDrawImage">
             <summary>
            Prepares the Chart Canvas for drawing. 
             </summary>
        </member>
        <member name="M:Steema.TeeChart.Drawing.Graphics3D.ValidState">
             <summary>
            Returns true if the Chart Canvas can be drawn to. 
             </summary>
        </member>
        <member name="M:Steema.TeeChart.Drawing.Graphics3D.PaintImageBevel(System.Drawing.Rectangle,System.Int32,Steema.TeeChart.Drawing.ChartPen,Steema.TeeChart.Drawing.ChartBrush,System.Int32)">
             <summary>
            Draws a custom border around a specified Rectangle. 
             </summary>
        </member>
        <member name="P:Steema.TeeChart.Drawing.Graphics3D.Pen">
            <summary>
            Indicates the kind of pen used to draw Canvas lines.
            </summary>
        </member>
        <member name="P:Steema.TeeChart.Drawing.Graphics3D.CanvasType">
            <summary>
            Gets the type of canvas used to draw the chart.
            </summary>
        </member>
        <member name="P:Steema.TeeChart.Drawing.Graphics3D.Brush">
            <summary>
            Determines Brush used to fill the Canvas draw rectangle background.
            </summary>
        </member>
        <member name="P:Steema.TeeChart.Drawing.Graphics3D.Gradient">
            <summary>
            Gets and sets the Brush.Gradient properties of the Canvas.
            </summary>
        </member>
        <member name="P:Steema.TeeChart.Drawing.Graphics3D.Font">
            <summary>
            Determines Font for outputted text when using the Drawing.
            </summary>
        </member>
        <member name="P:Steema.TeeChart.Drawing.Graphics3D.ScreenHeight">
            <summary>
            Returns the height, in pixels, of the Chart Panel .
            </summary>
        </member>
        <member name="P:Steema.TeeChart.Drawing.Graphics3D.ScreenWidth">
            <summary>
            Returns the width, in pixels, of the Chart Panel.
            </summary>
        </member>
        <member name="P:Steema.TeeChart.Drawing.Graphics3D.TextAlign">
            <summary>
            Sets the alignment used when displaying text using TextOut or TextOut3D.
            </summary>
        </member>
        <member name="P:Steema.TeeChart.Drawing.Graphics3D.XCenter">
            <summary>
            Obtain the X coordinate of the pixel location of the center of the 3D Canvas.
            </summary>
        </member>
        <member name="P:Steema.TeeChart.Drawing.Graphics3D.YCenter">
            <summary>
            Obtain the Y coordinate of the pixel location of the center of the 3D Canvas.
            </summary>
        </member>
        <member name="P:Steema.TeeChart.Drawing.Graphics3D.SmoothingMode">
            <summary>
            Smoothing (anti-aliasing) mode
            </summary>
        </member>
        <member name="P:Steema.TeeChart.Drawing.Graphics3D.TextRenderingHint">
            <summary>
            Chooses between speed or display quality for Text rendering.
            </summary>
        </member>
        <member name="P:Steema.TeeChart.Drawing.Graphics3D.Supports3DText">
            <summary>
            Returns if Canvas supports 3D Text or not.
            </summary>
        </member>
        <member name="P:Steema.TeeChart.Drawing.Graphics3D.BackBuffer">
            <summary>
            Gets and sets the "manual" back buffer of the chart.
            </summary>
        </member>
        <member name="P:Steema.TeeChart.Drawing.Graphics3D.BackBufferContext">
            <summary>
            Gets and sets the back buffer context.
            </summary>
        </member>
        <member name="P:Steema.TeeChart.Drawing.Graphics3D.BackColor">
            <summary>
            Sets / returns the color used to fill spaces when displaying text 
            or filling with brushes of different style than bsSolid.
            </summary>
        </member>
        <member name="P:Steema.TeeChart.Drawing.Graphics3D.SupportsFullRotation">
            <summary>
            Returns if Canvas can do rotation and elevation of more than 90 degree.
            </summary>
        </member>
        <member name="P:Steema.TeeChart.Drawing.Graphics3D.UseBuffer">
            <summary>
            Draws items to an internal canvas to prevent flickering on screen.
            </summary>
        </member>
        <member name="P:Steema.TeeChart.Drawing.Graphics3D.BufferStyle">
            <summary>
            Draws items to an internal canvas to prevent flickering on screen.
            </summary>
        </member>
        <member name="P:Steema.TeeChart.Drawing.Graphics3D.RotationCenterFloat">
            <summary>
             Sets the Pixel location (using X,Y,Z) of the centre of rotation for use with the Aspect.Rotation property.
            </summary>
        </member>
        <member name="P:Steema.TeeChart.Drawing.Graphics3D.RotationCenter">
            <summary>
             Sets the Pixel location (using X,Y,Z) of the centre of rotation for use with the Aspect.Rotation property.
            </summary>
        </member>
        <member name="P:Steema.TeeChart.Drawing.Graphics3D.ChartXCenter">
            <summary>
            Returns the centre Horizontal co-ordinate of the Chart.
            </summary>
        </member>
        <member name="P:Steema.TeeChart.Drawing.Graphics3D.ChartYCenter">
            <summary>
            Returns the middle Vertical coordinate of the Chart.
            </summary>
        </member>
        <member name="P:Steema.TeeChart.Drawing.Graphics3D.FontHeight">
            <summary>
            Defines the Height of the Font in pixels.
            </summary>
        </member>
        <member name="M:Steema.TeeChart.Drawing.Graphics3DVec.AddToStream(System.String)">
            <summary>
            Adds canvas instruction to stream.
            </summary>
            <param name="text">Instructions to be added to stream.</param>
        </member>
        <member name="M:Steema.TeeChart.Drawing.Graphics3DVec.VerticalLine(System.Int32,System.Int32,System.Int32)">
            <summary>
            Draws a Vertical Line from (X,Top) to (X,Bottom).
            </summary>
        </member>
        <member name="M:Steema.TeeChart.Drawing.Graphics3DVec.HorizontalLine(System.Int32,System.Int32,System.Int32)">
            <summary>
            Draws a Horizontal Line.
            </summary>
        </member>
        <member name="M:Steema.TeeChart.Drawing.Graphics3DVec.Rectangle(System.Drawing.Rectangle)">
            <summary>
            Draws a Rectangle (Rectangle r).
            </summary>
        </member>
        <member name="F:Steema.TeeChart.Tools.LegendPaletteAxis.laDefault">
            <summary>
            Use default axis.
            </summary>
        </member>
        <member name="F:Steema.TeeChart.Tools.LegendPaletteAxis.laOther">
            <summary>
            Use other axis.
            </summary>
        </member>
        <member name="F:Steema.TeeChart.Tools.LegendPaletteAxis.laBoth">
            <summary>
            Use both axes.
            </summary>
        </member>
        <member name="P:Steema.TeeChart.Tools.LegendPalette.Description">
            <summary>
            Gets descriptive text.
            </summary>
        </member>
        <member name="P:Steema.TeeChart.Tools.LegendPalette.Summary">
            <summary>
            Gets detailed descriptive text.
            </summary>
        </member>
        <member name="T:Steema.TeeChart.Tools.ExtraLegend">
            <summary>
            ExtraLegend tool.
            </summary>
        </member>
        <member name="P:Steema.TeeChart.Tools.ExtraLegend.Legend">
            <summary>
            Gets or sets the Legend characteristics.
            </summary>
        </member>
        <member name="P:Steema.TeeChart.Tools.ExtraLegend.Description">
            <summary>
            Gets descriptive text.
            </summary>
        </member>
        <member name="P:Steema.TeeChart.Tools.ExtraLegend.Summary">
            <summary>
            Gets detailed descriptive text.
            </summary>
        </member>
        <member name="T:Steema.TeeChart.GetAxisLabelEventHandler">
            <summary>AxisLabel event handler</summary>
        </member>
        <member name="T:Steema.TeeChart.GetNextAxisLabelEventHandler">
            <summary>GetNextAxisLabel event handler</summary>
        </member>
        <member name="T:Steema.TeeChart.GetLegendRectEventHandler">
            <summary>GetLegendRect event handler</summary>
        </member>
        <member name="T:Steema.TeeChart.GetLegendPosEventHandler">
            <summary>GetLegendPos event handler</summary>
        </member>
        <member name="T:Steema.TeeChart.GetLegendTextEventHandler">
            <summary>GetLegendText event handler</summary>
        </member>
        <member name="T:Steema.TeeChart.ScrollModHandler">
            <summary>Scroll event handler</summary>
        </member>
        <member name="T:Steema.TeeChart.SerializeEventHandler">
            <summary>Serialize Type event handler</summary>
        </member>
        <member name="T:Steema.TeeChart.SerializeEventArgs">
            <summary>
            Axis Label EventArgs. See <see cref="T:Steema.TeeChart.GetAxisLabelEventHandler"/>
            </summary>
        </member>
        <member name="P:Steema.TeeChart.SerializeEventArgs.Type">
            <summary>
            Sets Type to add to Serialization. 
            </summary>
        </member>
        <member name="P:Steema.TeeChart.SerializeEventArgs.TypeName">
            <summary>
            Name of Type to Serialize 
            </summary>
        </member>
        <member name="T:Steema.TeeChart.GetAxisLabelEventArgs">
            <summary>
            Axis Label EventArgs. See <see cref="T:Steema.TeeChart.GetAxisLabelEventHandler"/>
            </summary>
        </member>
        <member name="P:Steema.TeeChart.GetAxisLabelEventArgs.Series">
            <summary>
            Read only. Label Series
            </summary>
        </member>
        <member name="P:Steema.TeeChart.GetAxisLabelEventArgs.ValueIndex">
            <summary>
            Read only. Index of Label
            </summary>
        </member>
        <member name="P:Steema.TeeChart.GetAxisLabelEventArgs.LabelText">
            <summary>
            Modifies the Axis Label text. 
            </summary>
        </member>
        <member name="T:Steema.TeeChart.GetNextAxisLabelEventArgs">
            <summary>
            'Get Next' Axis Label EventArgs. See <see cref="T:Steema.TeeChart.GetNextAxisLabelEventHandler"/>
            </summary>
        </member>
        <member name="T:Steema.TeeChart.GetLegendRectEventArgs">
            <summary>
            Legend Rectangle EventArgs. See <see cref="T:Steema.TeeChart.GetLegendRectEventHandler"/>
            </summary>
        </member>
        <member name="T:Steema.TeeChart.GetLegendTextEventArgs">
            <summary>
            Legend Text EventArgs. See <see cref="T:Steema.TeeChart.GetLegendTextEventHandler"/>
            </summary>
        </member>
        <member name="P:Steema.TeeChart.GetLegendTextEventArgs.Text">
            <summary>
            Sets the Text for the Legend values.
            </summary>
        </member>
        <member name="T:Steema.TeeChart.GetLegendPosEventArgs">
            <summary>
            Legend Position EventArgs. See <see cref="T:Steema.TeeChart.GetLegendPosEventHandler"/>
            </summary>
        </member>
        <member name="T:Steema.TeeChart.Styles.Volume">
            <summary>
            Volume Series.
            </summary>
        </member>
        <member name="T:Steema.TeeChart.Styles.Custom">
             <summary>
            Base Series class inherited by a number of TeeChart series styles.  
             </summary>
        </member>
        <member name="T:Steema.TeeChart.Styles.CustomPoint">
             <summary>
            Base Series class inherited by a number of TeeChart series styles. 
             </summary>
        </member>
        <member name="T:Steema.TeeChart.Styles.BaseLine">
             <summary>
            Abstract Series class inherited by a number of TeeChart series styles.
             </summary>
        </member>
        <member name="P:Steema.TeeChart.Styles.BaseLine.LinePen">
            <summary>
            Determines pen to draw the line connecting all points.
            </summary>
        </member>
        <member name="M:Steema.TeeChart.Styles.CustomPoint.PointOrigin(System.Int32,System.Boolean)">
            <summary>
            For stacked series, PointOrigin returns the sum of ValueIndex values 
            of all series, until this series in the Chart.Series collection order.
            </summary>
            <param name="valueIndex">The point index</param>
            <param name="sumAll">When true, all series are taken into calculation</param>
            <returns>Point origin value</returns>
        </member>
        <member name="M:Steema.TeeChart.Styles.CustomPoint.ClickedPointer(System.Drawing.Point)">
             <summary>
            For internal use. 
             </summary>
        </member>
        <member name="M:Steema.TeeChart.Styles.CustomPoint.ClickedPointer(System.Int32,System.Int32)">
             <summary>
            For internal use. 
             </summary>
        </member>
        <member name="M:Steema.TeeChart.Styles.CustomPoint.ClickedPointer(System.Int32,System.Int32,System.Int32,System.Int32,System.Int32)">
             <summary>
            For internal use. 
             </summary>
        </member>
        <member name="M:Steema.TeeChart.Styles.CustomPoint.DrawPointer(System.Int32,System.Int32,System.Drawing.Color,System.Int32)">
             <summary>
            Draws series pointer to the Canvas. 
             </summary>
        </member>
        <member name="M:Steema.TeeChart.Styles.CustomPoint.CalcYPos(System.Int32)">
            <summary>
            Returns vertical screen position for a given point.
            </summary>
        </member>
        <member name="M:Steema.TeeChart.Styles.CustomPoint.CalcXPos(System.Int32)">
            <summary>
            Returns horizontal screen position for a given point.
            </summary>
        </member>
        <member name="M:Steema.TeeChart.Styles.CustomPoint.DrawValue(System.Int32)">
            <summary>
            Called internally. Draws the "ValueIndex" point of the Series.
            </summary>
        </member>
        <member name="M:Steema.TeeChart.Styles.CustomPoint.Clicked(System.Int32,System.Int32)">
            <summary>
            Returns the ValueIndex of the "clicked" point in the Series.
            </summary>
        </member>
        <member name="M:Steema.TeeChart.Styles.CustomPoint.MaxXValue">
            <summary>
            Returns the Maximum Value of the Series X Values List.
            </summary>
        </member>
        <member name="M:Steema.TeeChart.Styles.CustomPoint.MinXValue">
            <summary>
            Returns the Minimum Value of the Series X Values List.
            </summary>
        </member>
        <member name="M:Steema.TeeChart.Styles.CustomPoint.MaxYValue">
            <summary>
            Returns the Maximum Value of the Series Y Values List.
            </summary>
        </member>
        <member name="M:Steema.TeeChart.Styles.CustomPoint.MinYValue">
            <summary>
            Returns the Minimum Value of the Series Y Values List.
            </summary>
        </member>
        <member name="E:Steema.TeeChart.Styles.CustomPoint.ClickPointer">
             <summary>
            Occurs when a series pointer is clicked. 
             </summary>
        </member>
        <member name="E:Steema.TeeChart.Styles.CustomPoint.GetPointerStyle">
             <summary>
            Occurs on the drawing of the series pointers. 
             </summary>
        </member>
        <member name="P:Steema.TeeChart.Styles.CustomPoint.Stacked">
            <summary>
            Defines how multiple series will be displayed.
            </summary>
        </member>
        <member name="P:Steema.TeeChart.Styles.CustomPoint.Pointer">
            <summary>
            Defines all necessary properties of the Series Pointer.
            </summary>
        </member>
        <member name="T:Steema.TeeChart.Styles.CustomPoint.ClickPointerEventHandler">
             <summary>
            The Delegate for the <see cref="E:Steema.TeeChart.Styles.CustomPoint.ClickPointer"/> event.  
             </summary>
        </member>
        <member name="T:Steema.TeeChart.Styles.CustomPoint.GetPointerStyleEventHandler">
             <summary>
            The Delegate for the <see cref="E:Steema.TeeChart.Styles.CustomPoint.GetPointerStyle"/> event.  
             </summary>
        </member>
        <member name="M:Steema.TeeChart.Styles.Custom.Clicked(System.Int32,System.Int32)">
            <summary>
            Calculates if any point is at XY position.
            </summary>
            <returns>Point index</returns>
        </member>
        <member name="M:Steema.TeeChart.Styles.Custom.DrawValue(System.Int32)">
            <summary>
            Called internally. Draws the "ValueIndex" point of the Series.
            </summary>
        </member>
        <member name="P:Steema.TeeChart.Styles.Custom.ClickableLine">
            <summary>
            Allows mouse clicks over the line drawn between points.
            </summary>
        </member>
        <member name="P:Steema.TeeChart.Styles.Custom.Opacity">
            <summary>
            Sets Opacity level from 0 to 100%
            </summary>
        </member>
        <member name="P:Steema.TeeChart.Styles.Custom.Smoothed">
            <summary>
            Gets or sets whether the Line Series' line is smoothed.
            </summary>
        </member>
        <member name="P:Steema.TeeChart.Styles.Custom.Transparency">
            <summary>
            Sets Transparency level from 0 to 100%
            </summary>
        </member>
        <member name="P:Steema.TeeChart.Styles.Custom.Brush">
            <summary>
            Sets Brush characteristics.
            </summary>
        </member>
        <member name="P:Steema.TeeChart.Styles.Custom.Dark3D">
            <summary>
            Darkens parts of 3D Line Series to add depth.
            </summary>
        </member>
        <member name="P:Steema.TeeChart.Styles.Custom.Stairs">
            <summary>
            Steps line joining adjacent points.
            </summary>
        </member>
        <member name="P:Steema.TeeChart.Styles.Custom.ColorEachLine">
            <summary>
            Enables/Disables the coloring of each connecting line of a series.
            </summary>
        </member>
        <member name="P:Steema.TeeChart.Styles.Custom.InvertedStairs">
            <summary>
            Changes the direction of the step, when true.
            </summary>
        </member>
        <member name="P:Steema.TeeChart.Styles.Custom.OutLine">
            <summary>
            Pen for Series Line's outer pen.
            </summary>
        </member>
        <member name="P:Steema.TeeChart.Styles.Custom.LineHeight">
            <summary>
            Defines the vertical thickness of the line in pixels.
            </summary>
        </member>
        <member name="M:Steema.TeeChart.Styles.Volume.DrawValue(System.Int32)">
            <summary>
            Called internally. Draws the "ValueIndex" point of the Series.
            </summary>
        </member>
        <member name="P:Steema.TeeChart.Styles.Volume.UseOrigin">
            <summary>
            Enables/Disables the Y value that defines the bottom position for Volume points.
            </summary>
        </member>
        <member name="P:Steema.TeeChart.Styles.Volume.Origin">
            <summary>
            Defines the YValue used as the origin for the specified Volume Series. 
            </summary>
        </member>
        <member name="P:Steema.TeeChart.Styles.Volume.InflateMargins">
            <summary>
            Expands axes to fit volume lines.
            </summary>
        </member>
        <member name="T:Steema.TeeChart.Styles.PointFigure">
            <summary>
            PointFigure Series.
            </summary>
        </member>
        <member name="T:Steema.TeeChart.Styles.OHLC">
             <summary>
            OHLC is an base Series class that maintains lists for Open, Close, High and Low values.  
             </summary>
        </member>
        <member name="M:Steema.TeeChart.Styles.OHLC.Add(System.Int32,System.Double,System.Double,System.Double,System.Double)">
             <summary>
            Adds new point with specified integer index and double open, high, low and close. 
             </summary>
             <returns><see cref="T:Steema.TeeChart.Styles.ValueList"/> index of added point</returns>
        </member>
        <member name="M:Steema.TeeChart.Styles.OHLC.Add(System.Double,System.Double,System.Double,System.Double,System.Double)">
             <summary>
            Adds new point with specified double index and double open, high, low and close. 
             </summary>
             <returns><see cref="T:Steema.TeeChart.Styles.ValueList"/> index of added point</returns>
        </member>
        <member name="M:Steema.TeeChart.Styles.OHLC.Add(System.Double,System.Double,System.Double,System.Double)">
             <summary>
            Adds new point with specified double open, high, low and close. 
             </summary>
             <returns><see cref="T:Steema.TeeChart.Styles.ValueList"/> index of added point</returns>
        </member>
        <member name="M:Steema.TeeChart.Styles.OHLC.Add(System.DateTime,System.Double,System.Double,System.Double,System.Double)">
             <summary>
            Adds new point with specified DateTime x and double open, high, low and close. 
             </summary>
             <returns><see cref="T:Steema.TeeChart.Styles.ValueList"/> index of added point</returns>
        </member>
        <member name="M:Steema.TeeChart.Styles.OHLC.Add(System.Data.DataView)">
             <summary>
            Adds the DataView to the OHLC series. 
             </summary>
        </member>
        <member name="M:Steema.TeeChart.Styles.OHLC.IsValidSourceOf(Steema.TeeChart.Styles.Series)">
            <summary>
            Validates Series datasource.
            </summary>
            <param name="value">The series to validate.</param>
            <returns>True if value can be a Series data source.</returns>
        </member>
        <member name="M:Steema.TeeChart.Styles.OHLC.MaxYValue">
            <summary>
            Returns the Maximum Value of the Series Y Values List.
            </summary>
        </member>
        <member name="M:Steema.TeeChart.Styles.OHLC.MinYValue">
            <summary>
            Returns the Minimum Value of the Series Y Values List.
            </summary>
        </member>
        <member name="P:Steema.TeeChart.Styles.OHLC.DateValues">
            <summary>
            Gets and sets all Stock market Date values.
            </summary>
        </member>
        <member name="P:Steema.TeeChart.Styles.OHLC.CloseValues">
            <summary>
            Gets and sets all Stock market Close values.
            </summary>
        </member>
        <member name="P:Steema.TeeChart.Styles.OHLC.OpenValues">
            <summary>
            Gets and sets all Stock market Open values.
            </summary>
        </member>
        <member name="P:Steema.TeeChart.Styles.OHLC.HighValues">
            <summary>
            Gets and sets all Stock market High values.
            </summary>
        </member>
        <member name="P:Steema.TeeChart.Styles.OHLC.LowValues">
            <summary>
            Gets and sets all Stock market Low values.
            </summary>
        </member>
        <member name="P:Steema.TeeChart.Styles.OHLC.Item(System.Int32)">
            <summary>
            Point characteristics
            </summary>
        </member>
        <member name="T:Steema.TeeChart.Styles.LinePoint">
            <summary>
            LinePoint series.
            </summary>
        </member>
        <member name="T:Steema.TeeChart.Styles.Points">
            <summary>
            Point Series.
            </summary>
        </member>
        <member name="P:Steema.TeeChart.Styles.Points.LinePen">
            <summary>
            Sets the Pen for the Point connecting Lines.
            </summary>
        </member>
        <member name="P:Steema.TeeChart.Styles.Points.Description">
             <summary>
            Gets descriptive text. 
             </summary>
        </member>
        <member name="M:Steema.TeeChart.Styles.LinePoint.DrawValue(System.Int32)">
            <summary>
            Called internally. Draws the "ValueIndex" point of the Series.
            </summary>
        </member>
        <member name="T:Steema.TeeChart.Styles.Funnel">
            <summary>
            Funnel Series.
            </summary>
        </member>
        <member name="M:Steema.TeeChart.Styles.Funnel.LegendString(System.Int32,Steema.TeeChart.LegendTextStyles)">
            <summary>
            Returns LegendString for LegendIndexth item.
            </summary>
        </member>
        <member name="M:Steema.TeeChart.Styles.Funnel.MinYValue">
            <summary>
            Returns the Minimum Value of the Series Y Values List.
            </summary>
        </member>
        <member name="M:Steema.TeeChart.Styles.Funnel.MaxXValue">
            <summary>
            Returns the Maximum Value of the Series X Values List.
            </summary>
        </member>
        <member name="M:Steema.TeeChart.Styles.Funnel.MinXValue">
            <summary>
            Returns the Minimum Value of the Series X Values List.
            </summary>
        </member>
        <member name="M:Steema.TeeChart.Styles.Funnel.DrawValue(System.Int32)">
            <summary>
            Called internally. Draws the "ValueIndex" point of the Series.
            </summary>
        </member>
        <member name="M:Steema.TeeChart.Styles.Funnel.Recalc">
            <summary>
            Uses all Quote and Opportunity values to reconstruct the Funnel chart.
            </summary>
        </member>
        <member name="M:Steema.TeeChart.Styles.Funnel.Add(System.Double,System.Double,System.String,System.Drawing.Color)">
            <summary>
            Adds new Funnel segment to the Series.
            </summary>
        </member>
        <member name="P:Steema.TeeChart.Styles.Funnel.AboveColor">
            <summary>
            Funnel segment color if Opportunity value is greater than Quote value.
            </summary>
        </member>
        <member name="P:Steema.TeeChart.Styles.Funnel.WithinColor">
            <summary>
            Funnel segment color if Opportunity value is within DifferenceLimit % below the Quote value.
            </summary>
        </member>
        <member name="P:Steema.TeeChart.Styles.Funnel.BelowColor">
            <summary>
            Funnel segment color if Opportunity value is more than the DifferenceLimit % below the Quote value.
            </summary>
        </member>
        <member name="P:Steema.TeeChart.Styles.Funnel.Pen">
            <summary>
            Define Pen to draw the Funnel Chart.
            </summary>
        </member>
        <member name="P:Steema.TeeChart.Styles.Funnel.LinesPen">
            <summary>
            Defines Pen to draw FunnelSeries bounding polygon.
            </summary>
        </member>
        <member name="P:Steema.TeeChart.Styles.Funnel.Brush">
            <summary>
            Defines Brush to fill Funnel Series.
            </summary>
        </member>
        <member name="P:Steema.TeeChart.Styles.Funnel.QuoteValues">
            <summary>
            Accesses the quote values of the FunnelSeries.
            </summary>
        </member>
        <member name="P:Steema.TeeChart.Styles.Funnel.DifferenceLimit">
            <summary>
            Sets the difference (expressed in Quote %) used to define the Funnel segment color.
            </summary>
        </member>
        <member name="P:Steema.TeeChart.Styles.Funnel.QuotesSorted">
            <summary>
            Sorts added segments by QuoteValues in descending order.
            </summary>
        </member>
        <member name="P:Steema.TeeChart.Styles.Funnel.AutoUpdate">
            <summary>
            Reconstructs FunnelSeries with every added point.
            </summary>
        </member>
        <member name="P:Steema.TeeChart.Styles.Funnel.Description">
            <summary>
            Gets descriptive text.
            </summary>
        </member>
        <member name="T:Steema.TeeChart.Styles.CustomPolar">
            <summary>
            CustomPolar Series.
            </summary>		
        </member>
        <member name="M:Steema.TeeChart.Styles.CustomPolar.GetAngleIncrement">
            <summary>
            The Bottom Axis is used as Angle axis.
            </summary>
        </member>
        <member name="M:Steema.TeeChart.Styles.CustomPolar.GetRadiusIncrement">
            <summary>
            The Left Axis is used as Radius axis.
            </summary>
        </member>
        <member name="M:Steema.TeeChart.Styles.CustomPolar.DrawValue(System.Int32)">
            <summary>
            Called internally. Draws the "ValueIndex" point of the Series.
            </summary>
        </member>
        <member name="M:Steema.TeeChart.Styles.CustomPolar.CalcXPos(System.Int32)">
            <summary>
            Returns the pixel Screen Horizontal coordinate of the ValueIndex Series value.
            </summary>
        </member>
        <member name="M:Steema.TeeChart.Styles.CustomPolar.CalcYPos(System.Int32)">
            <summary>
            Returns the pixel Screen Vertical coordinate of the ValueIndex Series value.
            </summary>
        </member>
        <member name="E:Steema.TeeChart.Styles.CustomPolar.GetPointerStyle">
             <summary>
            Occurs on the drawing of the series pointers. 
             </summary>
        </member>
        <member name="P:Steema.TeeChart.Styles.CustomPolar.AngleValues">
            <summary>
            Gets list of angle values for each polar point.
            </summary>
        </member>
        <member name="P:Steema.TeeChart.Styles.CustomPolar.RadiusValues">
            <summary>
            Gets list of radius values for each polar point.
            </summary>
        </member>
        <member name="P:Steema.TeeChart.Styles.CustomPolar.AngleIncrement">
            <summary>
            Sets angle in degrees used to draw the dividing grid lines in anti-clockwise direction.
            </summary>
        </member>
        <member name="P:Steema.TeeChart.Styles.CustomPolar.Brush">
            <summary>
            Sets Polar Back Brush.
            </summary>
        </member>
        <member name="P:Steema.TeeChart.Styles.CustomPolar.CircleLabels">
            <summary>
            Sets CicleLabel properties.
            </summary>
        </member>
        <member name="P:Steema.TeeChart.Styles.CustomPolar.Font">
            <summary>
            Sets the label font.
            </summary>
        </member>
        <member name="P:Steema.TeeChart.Styles.CustomPolar.CircleLabelsInside">
            <summary>
            Enables/disables the display of the axis labels inside the circle area.
            </summary>
        </member>
        <member name="P:Steema.TeeChart.Styles.CustomPolar.CircleLabelsRotated">
             <summary>
            When true rotates the labels of a circular TeeChart series at an angle in line with the Radar/Polar circle at each Label point.
             </summary>
        </member>
        <member name="P:Steema.TeeChart.Styles.CustomPolar.CirclePen">
            <summary>
            Determines the pen used to draw the outmost circle.
            </summary>
        </member>
        <member name="P:Steema.TeeChart.Styles.CustomPolar.ClockWiseLabels">
            <summary>
            Displays of the circle labels in a clockwise direction.
            </summary>
        </member>
        <member name="P:Steema.TeeChart.Styles.CustomPolar.CloseCircle">
            <summary>
            Draws a Line between the last and first PolarSeries point coordinates.
            </summary>
        </member>
        <member name="P:Steema.TeeChart.Styles.CustomPolar.LabelsMargin">
            <summary>
            Defines the distance between the CustomPolar circle and the labels.
            </summary>
        </member>
        <member name="P:Steema.TeeChart.Styles.CustomPolar.Pen">
            <summary>
            Determines Pen used to draw the Line connecting PolarSeries points.
            </summary>
        </member>
        <member name="P:Steema.TeeChart.Styles.CustomPolar.Pointer">
             <summary>
            Pointer contains several properties to control the formatting attributes of Points like Pen, Brush, Draw3D, Visible, etc. 
             </summary>
        </member>
        <member name="P:Steema.TeeChart.Styles.CustomPolar.RadiusIncrement">
            <summary>
            Determines the increment used to draw the ring grid lines.
            </summary>
        </member>
        <member name="P:Steema.TeeChart.Styles.CustomPolar.Transparency">
            <summary>
            Sets Transparency level from 0 to 100%.
            </summary>
        </member>
        <member name="T:Steema.TeeChart.Styles.CustomPolar.GetPointerStyleEventHandler">
             <summary>
            The Delegate for the <see cref="E:Steema.TeeChart.Styles.CustomPolar.GetPointerStyle"/> event.  
             </summary>
        </member>
        <member name="T:Steema.TeeChart.Styles.Custom2DPolar">
             <summary>
            Custom2DPolar is the ancestor of the WindRose Series and the Clock Series. 
             </summary>
        </member>
        <member name="T:Steema.TeeChart.Styles.PointerStyles">
             <summary>
            Describes the pointer style of a series pointer. 
             </summary>
        </member>
        <member name="F:Steema.TeeChart.Styles.PointerStyles.Rectangle">
             <summary>
            Defines the pointer as a rectangle. 
             </summary>
        </member>
        <member name="F:Steema.TeeChart.Styles.PointerStyles.Circle">
             <summary>
            Defines the pointer as a circle.  
             </summary>
        </member>
        <member name="F:Steema.TeeChart.Styles.PointerStyles.Triangle">
             <summary>
            Defines the pointer as a triangle.  
             </summary>
        </member>
        <member name="F:Steema.TeeChart.Styles.PointerStyles.DownTriangle">
             <summary>
            Defines the pointer as a down pointing triangle.  
             </summary>
        </member>
        <member name="F:Steema.TeeChart.Styles.PointerStyles.Cross">
             <summary>
            Defines the pointer as a cross.  
             </summary>
        </member>
        <member name="F:Steema.TeeChart.Styles.PointerStyles.DiagCross">
             <summary>
            Defines the pointer as a diagonal cross.  
             </summary>
        </member>
        <member name="F:Steema.TeeChart.Styles.PointerStyles.Star">
             <summary>
            Defines the pointer as a star.  
             </summary>
        </member>
        <member name="F:Steema.TeeChart.Styles.PointerStyles.Diamond">
             <summary>
            Defines the pointer as a diamond.  
             </summary>
        </member>
        <member name="F:Steema.TeeChart.Styles.PointerStyles.SmallDot">
             <summary>
            Defines the pointer as a small dot.  
             </summary>
        </member>
        <member name="F:Steema.TeeChart.Styles.PointerStyles.Nothing">
             <summary>
            Defines the pointer as no shape.  
             </summary>
        </member>
        <member name="F:Steema.TeeChart.Styles.PointerStyles.LeftTriangle">
             <summary>
            Defines the pointer as a left triangle.  
             </summary>
        </member>
        <member name="F:Steema.TeeChart.Styles.PointerStyles.RightTriangle">
             <summary>
            Defines the pointer as a right triangle.  
             </summary>
        </member>
        <member name="F:Steema.TeeChart.Styles.PointerStyles.Sphere">
             <summary>
            Defines the pointer as a graded sphere.  
             </summary>
        </member>
        <member name="F:Steema.TeeChart.Styles.PointerStyles.PolishedSphere">
             <summary>
            Defines the pointer as a polished sphere.  
             </summary>
        </member>
        <member name="F:Steema.TeeChart.Styles.PointerStyles.Hexagon">
            <summary>
            Defines the pointer as hexagon.
            </summary>
        </member>
        <member name="T:Steema.TeeChart.Styles.SeriesPointer">
             <summary>
            Some Series have a Pointer property which returns a SeriesPointer class. Pointers are shape figures drawn on each Y point coordinates. 
             </summary>
        </member>
        <member name="M:Steema.TeeChart.Styles.SeriesPointer.Draw(Steema.TeeChart.Drawing.Graphics3D,System.Boolean,System.Int32,System.Int32,System.Int32,System.Int32,System.Drawing.Color,Steema.TeeChart.Styles.PointerStyles)">
            <summary>
            Internal use. Draw Pointer
            </summary>
        </member>
        <member name="P:Steema.TeeChart.Styles.SeriesPointer.Dark3D">
            <summary>
            Fills pointer sides in 3D mode with darker color.
            </summary>
        </member>
        <member name="P:Steema.TeeChart.Styles.SeriesPointer.Draw3D">
            <summary>
            Draws pointer in 3D mode.
            </summary>
        </member>
        <member name="P:Steema.TeeChart.Styles.SeriesPointer.Visible">
            <summary>
            Shows or hides the pointer.
            </summary>
        </member>
        <member name="P:Steema.TeeChart.Styles.SeriesPointer.HorizSize">
            <summary>
            Horizontal size of pointer in pixels.
            </summary>
        </member>
        <member name="P:Steema.TeeChart.Styles.SeriesPointer.InflateMargins">
            <summary>
            Expands axes to fit pointers.
            </summary>
        </member>
        <member name="P:Steema.TeeChart.Styles.SeriesPointer.Style">
            <summary>
            Sets the Pointer style.
            </summary>
        </member>
        <member name="P:Steema.TeeChart.Styles.SeriesPointer.VertSize">
            <summary>
            Sets Horizontal size of pointer in pixels.
            </summary>
        </member>
        <member name="P:Steema.TeeChart.Styles.SeriesPointer.Transparency">
            <summary>
            Sets Percent of semiglass effect.
            </summary>
        </member>
        <member name="P:Steema.TeeChart.Styles.SeriesPointer.Gradient">
            <summary>
            Configures Gradient filling attributes.
            </summary>
        </member>
        <member name="P:Steema.TeeChart.Styles.SeriesPointer.StartZ">
            <summary>
            
            </summary>
        </member>
        <member name="P:Steema.TeeChart.Styles.SeriesPointer.MiddleZ">
            <summary>
            
            </summary>
        </member>
        <member name="P:Steema.TeeChart.Styles.SeriesPointer.EndZ">
            <summary>
            
            </summary>
        </member>
        <member name="P:Steema.TeeChart.Styles.SeriesPointer.Color">
            <summary>
            Sets the pointer color.
            </summary>
        </member>
        <member name="P:Steema.TeeChart.Styles.SeriesPointer.Pen">
            <summary>
            Pen used to draw a frame around Series Pointers.
            </summary>
        </member>
        <member name="P:Steema.TeeChart.Styles.SeriesPointer.Brush">
            <summary>
            Brush used to fill Series Pointers.
            </summary>
        </member>
        <member name="T:Steema.TeeChart.Styles.CustomStack">
             <summary>
            Describes the possible values of the <see cref="P:Steema.TeeChart.Styles.CustomPoint.Stacked"/> property. 
             </summary>
        </member>
        <member name="F:Steema.TeeChart.Styles.CustomStack.None">
             <summary>
            Series will be drawn one behind the other.  
             </summary>
        </member>
        <member name="F:Steema.TeeChart.Styles.CustomStack.Overlap">
             <summary>
            Series will be drawn one over the other. 
             </summary>
        </member>
        <member name="F:Steema.TeeChart.Styles.CustomStack.Stack">
             <summary>
            Draws each series on top of the previous one.  
             </summary>
        </member>
        <member name="F:Steema.TeeChart.Styles.CustomStack.Stack100">
             <summary>
            Adjusts each individual series to a common 0..100 axis scale. 
             </summary>
        </member>
        <member name="T:Steema.TeeChart.Styles.GetPointerStyleEventArgs">
             <summary>
            The Event Data for the <see cref="E:Steema.TeeChart.Styles.CustomPoint.GetPointerStyle"/> event. 
             </summary>
        </member>
        <member name="P:Steema.TeeChart.Styles.GetPointerStyleEventArgs.ValueIndex">
             <summary>
            The Index of the value in the series <see cref="T:Steema.TeeChart.Styles.ValueList"/>.  
             </summary>
        </member>
        <member name="P:Steema.TeeChart.Styles.GetPointerStyleEventArgs.Style">
             <summary>
            The series pointer <see cref="P:Steema.TeeChart.Styles.SeriesPointer.Style"/>.
             </summary>
        </member>
        <member name="P:Steema.TeeChart.Styles.GetPointerStyleEventArgs.Color">
             <summary>
            The series pointerColor.
             </summary>
        </member>
        <member name="T:Steema.TeeChart.Styles.Bar">
             <summary>
            The Bar Series component outputs all points as vertical bars.   
             </summary>
        </member>
        <member name="T:Steema.TeeChart.Styles.CustomBar">
            <summary>
            Custom Bar Series.
            </summary>
        </member>
        <member name="M:Steema.TeeChart.Styles.CustomBar.BarRectangle(System.Drawing.Color,System.Drawing.Rectangle)">
             <summary>
            For internal use. 
             </summary>
        </member>
        <member name="M:Steema.TeeChart.Styles.CustomBar.BarRectangle(System.Drawing.Color,System.Int32,System.Int32,System.Int32,System.Int32)">
             <summary>
            For internal use. 
             </summary>
        </member>
        <member name="M:Steema.TeeChart.Styles.CustomBar.BarMargin">
            <summary>
            Returns side margin amount in pixels.
            </summary>
            <returns>Side margin amount in pixels.</returns>
        </member>
        <member name="M:Steema.TeeChart.Styles.CustomBar.PointOrigin(System.Int32,System.Boolean)">
             <summary>
            For internal use. 
             </summary>
        </member>
        <member name="M:Steema.TeeChart.Styles.CustomBar.Clicked(System.Int32,System.Int32)">
            <summary>
            Returns the ValueIndex of the "clicked" point in the Series.
            </summary>
        </member>
        <member name="E:Steema.TeeChart.Styles.CustomBar.GetBarStyle">
             <summary>
            Occurs when series bars are painted. 
             </summary>
        </member>
        <member name="P:Steema.TeeChart.Styles.CustomBar.DepthPercent">
            <summary>
            Defines the percentage, from 0 to 100, that the bars will need in the "Z" depth space direction.
            </summary>
        </member>
        <member name="P:Steema.TeeChart.Styles.CustomBar.Gradient">
            <summary>
            Defines the color Gradient used to fill the Bars.
            </summary>
        </member>
        <member name="P:Steema.TeeChart.Styles.CustomBar.GradientRelative">
             <summary>
            When Gradient is Visible, calculates Colors based on highest bar. 
             </summary>
        </member>
        <member name="P:Steema.TeeChart.Styles.CustomBar.StackGroup">
            <summary>
            Allows stacking independent Series within the same Chart.
            </summary>
        </member>
        <member name="P:Steema.TeeChart.Styles.CustomBar.Dark3D">
            <summary>
            Darkens sides of bars to enhance 3D effect.
            </summary>
        </member>
        <member name="P:Steema.TeeChart.Styles.CustomBar.SideMargins">
            <summary>
            Sets a margin between Chart rectangle and Bars.
            </summary>
        </member>
        <member name="P:Steema.TeeChart.Styles.CustomBar.YOrigin">
             <summary>
            System.Obsolete: Please use <see cref="P:Steema.TeeChart.Styles.CustomBar.Origin"/> property.
             </summary>
        </member>
        <member name="P:Steema.TeeChart.Styles.CustomBar.UseOrigin">
            <summary>
            Allows Bars to be bottom aligned to the Origin property value.
            </summary>
        </member>
        <member name="P:Steema.TeeChart.Styles.CustomBar.Origin">
            <summary>
            Sets the common bottom value used for all Bar points.
            </summary>
        </member>
        <member name="P:Steema.TeeChart.Styles.CustomBar.AutoMarkPosition">
            <summary>
            Repositions Marks on BarSeries to prevent overlapping.
            </summary>
        </member>
        <member name="P:Steema.TeeChart.Styles.CustomBar.OffsetPercent">
            <summary>
            Sets the Bar displacement as percent of Bar size.
            </summary>
        </member>
        <member name="P:Steema.TeeChart.Styles.CustomBar.BarStyle">
            <summary>
            Defines the Bar shape used to draw Bars.
            </summary>
        </member>
        <member name="P:Steema.TeeChart.Styles.CustomBar.MarksOnBar">
            <summary>
            Sets a postition of the Marks into the Bars.
            </summary>
        </member>
        <member name="P:Steema.TeeChart.Styles.CustomBar.MarksLocation">
            <summary>
            Sets the alignment of the Mark into the Bars.
            </summary>
        </member>
        <member name="P:Steema.TeeChart.Styles.CustomBar.Brush">
            <summary>
            Defines the Brush used to fill Bars.
            </summary>
        </member>
        <member name="P:Steema.TeeChart.Styles.CustomBar.MultiBar">
            <summary>
            Determines how multiple BarSeries will be displayed in the same Chart.
            </summary>
        </member>
        <member name="P:Steema.TeeChart.Styles.CustomBar.Pen">
            <summary>
            Pen used to draw the Bar rectangles.
            </summary>
        </member>
        <member name="P:Steema.TeeChart.Styles.CustomBar.TickLines">
            <summary>
            Pen used to draw "tick" lines across each bar.
            </summary>
        </member>
        <member name="P:Steema.TeeChart.Styles.CustomBar.BarBounds">
            <summary>
            Coordinates of current Bar point being displayed.
            </summary>
        </member>
        <member name="T:Steema.TeeChart.Styles.CustomBar.GetBarStyleEventArgs">
             <summary>
            The Event Data for the <see cref="E:Steema.TeeChart.Styles.CustomBar.GetBarStyle"/> event.  
             </summary>
        </member>
        <member name="P:Steema.TeeChart.Styles.CustomBar.GetBarStyleEventArgs.ValueIndex">
             <summary>
            The Index of the value in the series <see cref="T:Steema.TeeChart.Styles.ValueList"/>.   
             </summary>
        </member>
        <member name="P:Steema.TeeChart.Styles.CustomBar.GetBarStyleEventArgs.Style">
             <summary>
            The Bar series <see cref="P:Steema.TeeChart.Styles.CustomBar.BarStyle"/>. 
             </summary>
        </member>
        <member name="T:Steema.TeeChart.Styles.CustomBar.GetBarStyleEventHandler">
             <summary>
            The Delegate for the <see cref="E:Steema.TeeChart.Styles.CustomBar.GetBarStyle"/> event.   
             </summary>
        </member>
        <member name="M:Steema.TeeChart.Styles.Bar.DrawValue(System.Int32)">
            <summary>
            Called internally. Draws the "ValueIndex" point of the Series.
            </summary>
        </member>
        <member name="M:Steema.TeeChart.Styles.Bar.DrawBar(System.Int32,System.Int32,System.Int32)">
            <summary>
            Internal use.
            </summary>
        </member>
        <member name="M:Steema.TeeChart.Styles.Bar.CalcXPos(System.Int32)">
            <summary>
            Returns the  Screen X pixel coordinate of the ValueIndex Series value.
            </summary>
        </member>
        <member name="M:Steema.TeeChart.Styles.Bar.CalcYPos(System.Int32)">
            <summary>
            Returns the  Screen Y pixel coordinate of the ValueIndex Series value.
            </summary>
        </member>
        <member name="M:Steema.TeeChart.Styles.Bar.GetOriginPos(System.Int32)">
            <summary>
            Returns the corresponding screen pixels coordinate of the leftmost horizontal bar edge.
            </summary>
        </member>
        <member name="M:Steema.TeeChart.Styles.Bar.MaxXValue">
            <summary>
            Returns the Maximum Value of the Series X Values List.
            </summary>
        </member>
        <member name="M:Steema.TeeChart.Styles.Bar.MinXValue">
             <summary>
            Returns the Minimum Value of the Series X Values List.
             </summary>
        </member>
        <member name="M:Steema.TeeChart.Styles.Bar.MaxYValue">
            <summary>
            Returns the Maximum Value of the Series Y Values List.
            </summary>
        </member>
        <member name="M:Steema.TeeChart.Styles.Bar.MinYValue">
            <summary>
            Returns the Minimum Value of the Series Y Values List.
            </summary>
        </member>
        <member name="P:Steema.TeeChart.Styles.Bar.Description">
             <summary>
            Gets descriptive text. 
             </summary>
        </member>
        <member name="P:Steema.TeeChart.Styles.Bar.BarWidthPercent">
            <summary>
            Determines the percent of total Bar width used.
            </summary>
        </member>
        <member name="T:Steema.TeeChart.Functions.PerimeterFunction">
            <summary>
            Perimeter function. 
            </summary>
        </member>
        <member name="T:Steema.TeeChart.Functions.Performance">
            <summary>
            Performance Function.
            </summary>
        </member>
        <member name="T:Steema.TeeChart.Editors.Export.ExportEditorTabs">
             <summary>
            Defines the Tabs of the Export Editor
             </summary>
        </member>
        <member name="T:Steema.TeeChart.Editors.Export.ExportEditor">
            <summary>
            Export Editor.
            </summary>
        </member>
        <member name="F:Steema.TeeChart.Editors.Export.ExportEditor.components">
            <summary>
            Required designer variable.
            </summary>
        </member>
        <member name="M:Steema.TeeChart.Editors.Export.ExportEditor.Dispose(System.Boolean)">
            <summary>
            Clean up any resources being used.
            </summary>
        </member>
        <member name="M:Steema.TeeChart.Editors.Export.ExportEditor.InitializeComponent">
            <summary>
            Required method for Designer support - do not modify
            the contents of this method with the code editor.
            </summary>
        </member>
        <member name="M:Steema.TeeChart.Editors.Tools.DragPointEditor.Dispose(System.Boolean)">
            <summary>
            Clean up any resources being used.
            </summary>
        </member>
        <member name="M:Steema.TeeChart.Editors.Tools.DragPointEditor.InitializeComponent">
            <summary>
            Required method for Designer support - do not modify
            the contents of this method with the code editor.
            </summary>
        </member>
        <member name="T:Steema.TeeChart.Editors.SeriesEditor">
            <summary>
            Generic Series Editor.
            </summary>
        </member>
        <member name="F:Steema.TeeChart.Editors.SeriesEditor.components">
            <summary>
            Required designer variable.
            </summary>
        </member>
        <member name="M:Steema.TeeChart.Editors.SeriesEditor.ShowEditor(Steema.TeeChart.Styles.Series)">
            <summary>
            Displays the Chart Editor at runtime.
            </summary>
        </member>
        <member name="M:Steema.TeeChart.Editors.SeriesEditor.ShowEditor(Steema.TeeChart.Styles.Series,Steema.TeeChart.Editors.ChartEditorTabs)">
            <summary>
            Displays the ChartEditorTabs tab at runtime.
            </summary>
        </member>
        <member name="M:Steema.TeeChart.Editors.SeriesEditor.Dispose(System.Boolean)">
            <summary>
            Clean up any resources being used.
            </summary>
        </member>
        <member name="M:Steema.TeeChart.Editors.SeriesEditor.InitializeComponent">
            <summary>
            Required method for Designer support - do not modify
            the contents of this method with the code editor.
            </summary>
        </member>
        <member name="T:Steema.TeeChart.Editors.Series.CalendarSeries">
            <summary>
            Calendar series editor.
            </summary>
        </member>
        <member name="F:Steema.TeeChart.Editors.Series.CalendarSeries.components">
            <summary>
            Required designer variable.
            </summary>
        </member>
        <member name="M:Steema.TeeChart.Editors.Series.CalendarSeries.Dispose(System.Boolean)">
            <summary>
            Clean up any resources being used.
            </summary>
        </member>
        <member name="M:Steema.TeeChart.Editors.Series.CalendarSeries.InitializeComponent">
            <summary>
            Required method for Designer support - do not modify
            the contents of this method with the code editor.
            </summary>
        </member>
        <member name="T:Steema.TeeChart.Editors.GradientEditor">
            <summary>
            Gradient Editor.
            </summary>
            
        </member>
        <member name="F:Steema.TeeChart.Editors.GradientEditor.components">
            <summary>
            Required designer variable.
            </summary>
        </member>
        <member name="M:Steema.TeeChart.Editors.GradientEditor.Dispose(System.Boolean)">
            <summary>
            Clean up any resources being used.
            </summary>
        </member>
        <member name="M:Steema.TeeChart.Editors.GradientEditor.InitializeComponent">
            <summary>
            Required method for Designer support - do not modify
            the contents of this method with the code editor.
            </summary>
        </member>
        <member name="T:Steema.TeeChart.Drawing.Graphics3DEPS">
            <summary>
            The Postscript canvas.
            </summary>
        </member>
        <member name="M:Steema.TeeChart.Drawing.Graphics3DEPS.Arc(System.Int32,System.Int32,System.Int32,System.Int32,System.Single,System.Single)">
            <summary>
            Use Arc to draw an elliptically curved line with the current Pen.
            </summary>
        </member>
        <member name="M:Steema.TeeChart.Drawing.Graphics3DEPS.Ellipse(System.Int32,System.Int32,System.Int32,System.Int32)">
            <summary>
            Draws an Ellipse between the 2 co-ordinates.
            </summary>
        </member>
        <member name="M:Steema.TeeChart.Drawing.Graphics3DEPS.ClipRectangle(System.Drawing.Rectangle)">
            <summary>
            Creates a rectangular Windows GDI clipping region.
            </summary>
        </member>
        <member name="M:Steema.TeeChart.Drawing.Graphics3DEPS.ClipPolygon(System.Drawing.Point[])">
            <summary>
            Creates a Polygonal Windows GDI clipping region.
            </summary>
        </member>
        <member name="M:Steema.TeeChart.Drawing.Graphics3DEPS.UnClip">
            <summary>
            Removes any clipping region applied to Chart Drawing.
            </summary>
        </member>
        <member name="M:Steema.TeeChart.Drawing.Graphics3DEPS.ClipEllipse(System.Drawing.Rectangle)">
            <summary>
            Creates a Elliptical Windows GDI clipping region.
            </summary>
        </member>
        <member name="M:Steema.TeeChart.Drawing.Graphics3DEPS.RotateLabel(System.Int32,System.Int32,System.String,System.Double)">
            <summary>
            Draws a rotated text string at the specified xy coordinates with the RotDegree rotation angle.
            </summary>
        </member>
        <member name="M:Steema.TeeChart.Drawing.Graphics3DEPS.EraseBackground(System.Int32,System.Int32,System.Int32,System.Int32)">
            <summary>
            Clears background defined for Rectangle Left, Top, Right, Bottom.
            </summary>
        </member>
        <member name="M:Steema.TeeChart.Drawing.Graphics3DEPS.FillRegion(System.Drawing.Brush,System.Drawing.Region)">
            <summary>
            Fills the interior of a Region. 
            </summary>
            <param name="brush">Brush that determines the characteristics of the fill.</param>
            <param name="region">Region that represents the area to fill.</param>
        </member>
        <member name="M:Steema.TeeChart.Drawing.Graphics3DEPS.Pixel(System.Int32,System.Int32,System.Int32,System.Drawing.Color)">
            <summary>
            Sets the 3D pixel to OLE_Color, using Pen.Width.
            </summary>
        </member>
        <member name="M:Steema.TeeChart.Drawing.Graphics3DEPS.Polyline(System.Drawing.Point[])">
            <summary>
            Draws a series of line segments to join point array p at z displacement
            </summary>
        </member>
        <member name="M:Steema.TeeChart.Drawing.Graphics3DEPS.Polygon(System.Drawing.Point[])">
            <summary>
            Draws a polygon.
            </summary>
        </member>
        <member name="M:Steema.TeeChart.Drawing.Graphics3DEPS.Draw(System.Int32,System.Int32,System.Drawing.Image)">
            <summary>
            Paints the image at x,y coordinates.
            </summary>
        </member>
        <member name="M:Steema.TeeChart.Drawing.Graphics3DEPS.Draw(System.Drawing.Rectangle,System.Drawing.Rectangle,System.Drawing.Image,System.Boolean)">
            <summary>
            Paints the image in rectangle r.
            </summary>
        </member>
        <member name="M:Steema.TeeChart.Drawing.Graphics3DEPS.DrawBeziers(System.Drawing.Point[])">
            <summary>
            Draws Bézier splines for the Point array p
            </summary>
        </member>
        <member name="M:Steema.TeeChart.Drawing.Graphics3DEPS.LineTo(System.Int32,System.Int32)">
            <summary>
            Draws a line from the present PenPos to the new co-ordinates.
            </summary>
        </member>
        <member name="M:Steema.TeeChart.Drawing.Graphics3DEPS.DrawPath(System.Drawing.Pen,System.Drawing.Drawing2D.GraphicsPath)">
            <summary>
            Draws a GraphicsPath. 
            </summary>
            <param name="pen">Pen that determines the color, width, and style of the path. </param>
            <param name="path">GraphicsPath to draw.</param>
        </member>
        <member name="F:Steema.TeeChart.Export.FlexOptions.components">
            <summary>
            Required designer variable.
            </summary>
        </member>
        <member name="M:Steema.TeeChart.Export.FlexOptions.Dispose(System.Boolean)">
            <summary>
            Clean up any resources being used.
            </summary>
            <param name="disposing">true if managed resources should be disposed; otherwise, false.</param>
        </member>
        <member name="M:Steema.TeeChart.Export.FlexOptions.InitializeComponent">
            <summary>
            Required method for Designer support - do not modify
            the contents of this method with the code editor.
            </summary>
        </member>
        <member name="T:Steema.TeeChart.Editors.Series.CustomGaugeSeries">
            <summary>
            Summary description for GaugesEditor.
            </summary>
        </member>
        <member name="F:Steema.TeeChart.Editors.Series.CustomGaugeSeries.components">
            <summary>
            Required designer variable.
            </summary>
        </member>
        <member name="M:Steema.TeeChart.Editors.Series.CustomGaugeSeries.Dispose(System.Boolean)">
            <summary>
            Clean up any resources being used.
            </summary>
        </member>
        <member name="M:Steema.TeeChart.Editors.Series.CustomGaugeSeries.InitializeComponent">
            <summary>
            Required method for Designer support - do not modify
            the contents of this method with the code editor.
            </summary>
        </member>
        <member name="T:Steema.TeeChart.Commander">
            <summary>
            Commander control.
            </summary>
        </member>
        <member name="T:Steema.TeeChart.ITeeEventListener">
            <summary>
            Interface supports inter-Component communication
            </summary>
        </member>
        <member name="M:Steema.TeeChart.Commander.Dispose(System.Boolean)">
            <summary> 
            Clean up any resources being used.
            </summary>
        </member>
        <member name="M:Steema.TeeChart.Commander.InitializeComponent">
            <summary> 
            Required method for Designer support - do not modify 
            the contents of this method with the code editor.
            </summary>
        </member>
        <member name="M:Steema.TeeChart.Commander.TeeEvent(Steema.TeeChart.TeeEvent)">
            <summary>
             Internal use. Provides an Event to subscribers to ITeeEventListener interface. 
            </summary>
        </member>
        <member name="P:Steema.TeeChart.Commander.LabelValues">
            <summary>
            Enables/disables the display of TeeCommander's advisory status messages.
            </summary>
        </member>
        <member name="P:Steema.TeeChart.Commander.LabelText">
            <summary>
            Accesses the LabelText for the TeeCommander navigator bar. 
            </summary>
        </member>
        <member name="T:Steema.TeeChart.Commander.SetLabelEventArgs">
            <summary>
            EventArgs to support Commander LabelText
            </summary>
        </member>
        <member name="T:Steema.TeeChart.Commander.SetLabelEventHandler">
            <summary>Commander SetLabel Event Handler</summary>
        </member>
        <member name="T:Steema.TeeChart.ZoomScroll">
            <summary>
            Internal use. Zoom and scroll support
            </summary>
        </member>
        <member name="M:Steema.TeeChart.ZoomScroll.Check">
            <summary>
            Swaps the X0 and X1 coordinates when X1 is lower than X0.
            </summary>
        </member>
        <member name="M:Steema.TeeChart.ZoomScroll.Activate(System.Int32,System.Int32)">
            <summary>
            Internal use. Starts a Zoom or Scroll from the co-ordinates X,Y.
            </summary>
        </member>
        <member name="P:Steema.TeeChart.ZoomScroll.Active">
            <summary>
            Returns the active state of Chart Zoom and Scroll.
            </summary>
        </member>
        <member name="P:Steema.TeeChart.ZoomScroll.KeyShift">
            <summary>
            Sets a keyboard button as an extra condition to initiate the zoom.
            </summary>
        </member>
        <member name="T:Steema.TeeChart.ScrollModes">
             <summary>
            Describes the possible values of the <see cref="P:Steema.TeeChart.Scroll.Allow"/> property. 
             </summary>
        </member>
        <member name="F:Steema.TeeChart.ScrollModes.None">
             <summary>
            Deny scrolling. 
             </summary>
        </member>
        <member name="F:Steema.TeeChart.ScrollModes.Vertical">
             <summary>
            Allow only Horizontal Scrolling. 
             </summary>
        </member>
        <member name="F:Steema.TeeChart.ScrollModes.Horizontal">
             <summary>
            Allow only Vertical Scrolling.  
             </summary>
        </member>
        <member name="F:Steema.TeeChart.ScrollModes.Both">
             <summary>
            Allow complete Horizontal and Vertical Scrolling.  
             </summary>
        </member>
        <member name="T:Steema.TeeChart.Scroll">
            <summary>
            Chart mouse scroll characteristics
            </summary>
        </member>
        <member name="P:Steema.TeeChart.Scroll.Allow">
            <summary>
            Enables/Disables selected ScrollModes.
            </summary>
        </member>
        <member name="P:Steema.TeeChart.Scroll.MouseButton">
            <summary>
            Sets the Mousebutton to use for the scroll action.
            </summary>
        </member>
        <member name="T:Steema.TeeChart.ZoomDirections">
             <summary>
            Describes the possible values of the <see cref="P:Steema.TeeChart.Zoom.Direction"/> property.
             </summary>
        </member>
        <member name="F:Steema.TeeChart.ZoomDirections.Horizontal">
             <summary>
            Allow only Horizontal Zooming. 
             </summary>
        </member>
        <member name="F:Steema.TeeChart.ZoomDirections.Vertical">
             <summary>
            Allow only Vertical Zooming.  
             </summary>
        </member>
        <member name="F:Steema.TeeChart.ZoomDirections.Both">
             <summary>
            Allow both Horizontal and Vertical Zooming.  
             </summary>
        </member>
        <member name="T:Steema.TeeChart.Zoom">
            <summary>
            Used at tChart1.Zoom property, determines mouse zoom attributes.
            </summary>
        </member>
        <member name="F:Steema.TeeChart.Zoom.AnimatedFactor">
            <summary>
            Controls the animated zoom "speed" (inertia)
            </summary>
        </member>
        <member name="M:Steema.TeeChart.Zoom.#ctor(Steema.TeeChart.Chart)">
            <summary>
            Creates a new Zoom instance.
            </summary>
        </member>
        <member name="M:Steema.TeeChart.Zoom.ZoomRect(System.Drawing.Rectangle)">
            <summary>
            Zooms the Chart rectangle. Units pixels
            </summary>
        </member>
        <member name="M:Steema.TeeChart.Zoom.Draw">
            <summary>
            Displays rectangle while dragging Chart for zoom operation.
            </summary>	
        </member>
        <member name="M:Steema.TeeChart.Zoom.SetChart(Steema.TeeChart.Chart)">
            <summary>
            Overrides base SetChart method to adjust pen and brush chart properties.
            </summary>
        </member>
        <member name="M:Steema.TeeChart.Zoom.Undo">
            <summary>
            Rescales the Chart Axis to their Maximum and Minimum values.
            </summary>
        </member>
        <member name="M:Steema.TeeChart.Zoom.ZoomPercent(System.Double)">
            <summary>
            Applies the specified PercentZoom Zoom In/Out to the current Axis scales.
            </summary>
        </member>
        <member name="P:Steema.TeeChart.Zoom.HistorySteps">
            <summary>
            Collection that stores Axes zoom history to be used when Zoom <see cref="P:Steema.TeeChart.Zoom.History"/> is true.
            </summary>
        </member>
        <member name="P:Steema.TeeChart.Zoom.Allow">
            <summary>
            Allows runtime Zoom by dragging the mouse when True.
            </summary>
        </member>
        <member name="P:Steema.TeeChart.Zoom.Animated">
            <summary>
            Animates Zoom in sequenced steps when True.
            </summary>
        </member>
        <member name="P:Steema.TeeChart.Zoom.Brush">
            <summary>
            Brush used to fill mousedragged zoom area.
            </summary>
        </member>
        <member name="P:Steema.TeeChart.Zoom.Direction">
            <summary>
            Sets the direction of the zoom on a selected area.
            </summary>
        </member>
        <member name="P:Steema.TeeChart.Zoom.AnimatedSteps">
            <summary>
            Determines number of steps of the animated zooming sequence.
            </summary>
        </member>
        <member name="P:Steema.TeeChart.Zoom.MinPixels">
            <summary>
            Sets min. number of pixels to actuate zoom action.
            </summary>
        </member>
        <member name="P:Steema.TeeChart.Zoom.MouseButton">
            <summary>
            Sets the mousebutton to use for the zoom action.
            </summary>
        </member>
        <member name="P:Steema.TeeChart.Zoom.Pen">
            <summary>
            Pen used to draw surrounding rectangle of zoom area.
            </summary>
        </member>
        <member name="P:Steema.TeeChart.Zoom.Zoomed">
            <summary>
            Determines if Chart axis scales fit all Chart points or not.
            </summary>
        </member>
        <member name="T:Steema.TeeChart.Tools.PieToolStyle">
             <summary>
            Describes the possible values of the <see cref="P:Steema.TeeChart.Tools.PieTool.Style"/> property. 
             </summary>
        </member>
        <member name="F:Steema.TeeChart.Tools.PieToolStyle.Focus">
             <summary>
            Draws a border around the focused pie slice. 
             </summary>
        </member>
        <member name="F:Steema.TeeChart.Tools.PieToolStyle.Explode">
             <summary>
            Explodes and un-explodes the focused slice.
             </summary>
        </member>
        <member name="T:Steema.TeeChart.Tools.PieTool">
            <summary>
            Pie Slices tool.
            </summary>
        </member>
        <member name="P:Steema.TeeChart.Tools.PieTool.Description">
            <summary>
            Gets descriptive text.
            </summary>
        </member>
        <member name="P:Steema.TeeChart.Tools.PieTool.Summary">
            <summary>
            Gets detailed descriptive text.
            </summary>
        </member>
        <member name="P:Steema.TeeChart.Tools.PieTool.Pen">
            <summary>
            Element Pen characteristics.
            </summary>
        </member>
        <member name="T:Steema.TeeChart.Tools.ColorLineToolOnDragEventHandler">
            <summary>ColorLine tool drag event handler</summary>
        </member>
        <member name="T:Steema.TeeChart.Tools.ColorLine">
            <summary>
            Color Line tool. To draw custom lines at a axis value.
            </summary>
        </member>
        <member name="P:Steema.TeeChart.Tools.ColorLine.OriginalCursor">
            <summary>
            Gets or sets the Cursor to which the ColorLine defaults when the mouse is not over it.
            </summary>
        </member>
        <member name="P:Steema.TeeChart.Tools.ColorLine.ColorLineClickTolerance">
            <summary>
            Gets and sets pixel proximity tolerance for Clicks.
            </summary>
        </member>
        <member name="P:Steema.TeeChart.Tools.ColorLine.Description">
            <summary>
            Gets descriptive text.
            </summary>
        </member>
        <member name="P:Steema.TeeChart.Tools.ColorLine.Summary">
            <summary>
            Gets detailed descriptive text.
            </summary>
        </member>
        <member name="P:Steema.TeeChart.Tools.ColorLine.AllowDrag">
            <summary>
            Allows mousedrag of Line when true .
            </summary>
        </member>
        <member name="P:Steema.TeeChart.Tools.ColorLine.DragRepaint">
            <summary>
            Repaints the Chart while moving the ColorLine when True.
            </summary>
        </member>
        <member name="P:Steema.TeeChart.Tools.ColorLine.Draw3D">
            <summary>
            Draws ColorLine in 3D when True.
            </summary>
        </member>
        <member name="P:Steema.TeeChart.Tools.ColorLine.DrawBehind">
            <summary>
            Draws the ColorLine behind the series values.
            </summary>
        </member>
        <member name="P:Steema.TeeChart.Tools.ColorLine.NoLimitDrag">
            <summary>
            Allows drag of ColorLine outside of the Chart rectangle.
            </summary>
        </member>
        <member name="P:Steema.TeeChart.Tools.ColorLine.Value">
            <summary>
            Determines Axis position where the ColorLine has to be drawn.
            </summary>
        </member>
        <member name="T:Steema.TeeChart.Themes.CustomTheme">
            <summary>
            Summary description for CustomTheme.
            </summary>
        </member>
        <member name="T:Steema.TeeChart.Themes.Theme">
            <summary>
            Summary description for Theme.
            </summary>
        </member>
        <member name="T:Steema.TeeChart.Styles.ErrorStyles">
             <summary>
            Describes the possible values of the <see cref="P:Steema.TeeChart.Styles.CustomError.ErrorStyle"/> property. 
             </summary>
        </member>
        <member name="F:Steema.TeeChart.Styles.ErrorStyles.Left">
             <summary>
            Crossbar of 'T' error displacement indicator displayed on the left.
             </summary>
        </member>
        <member name="F:Steema.TeeChart.Styles.ErrorStyles.Right">
             <summary>
            Crossbar of 'T' error displacement indicator displayed on the right. 
             </summary>
        </member>
        <member name="F:Steema.TeeChart.Styles.ErrorStyles.LeftRight">
             <summary>
            Crossbar of 'T' error displacement indicator displayed on the left and right. 
             </summary>
        </member>
        <member name="F:Steema.TeeChart.Styles.ErrorStyles.Top">
             <summary>
            Crossbar of 'T' error displacement indicator displayed on the top. 
             </summary>
        </member>
        <member name="F:Steema.TeeChart.Styles.ErrorStyles.Bottom">
             <summary>
            Crossbar of 'T' error displacement indicator displayed on the bottom. 
             </summary>
        </member>
        <member name="F:Steema.TeeChart.Styles.ErrorStyles.TopBottom">
             <summary>
            Crossbar of 'T' error displacement indicator displayed on the top and bottom. 
             </summary>
        </member>
        <member name="T:Steema.TeeChart.Styles.ErrorWidthUnits">
             <summary>
            Describes the possible values of the <see cref="P:Steema.TeeChart.Styles.CustomError.ErrorWidthUnits"/> property. 
             </summary>
        </member>
        <member name="F:Steema.TeeChart.Styles.ErrorWidthUnits.Percent">
             <summary>
            Defines the error width units as a percentage of the chart size. 
             </summary>
        </member>
        <member name="F:Steema.TeeChart.Styles.ErrorWidthUnits.Pixels">
             <summary>
            Defines the error width units in pixels. 
             </summary>
        </member>
        <member name="T:Steema.TeeChart.Styles.CustomError">
            <summary>
            CustomErrorSeries Series.
            </summary>
        </member>
        <member name="M:Steema.TeeChart.Styles.CustomError.Add(System.Double,System.Double,System.Double,System.String,System.Drawing.Color)">
            <summary>
            Adds a new Error Bar point in selected color and with label.
            </summary>
        </member>
        <member name="M:Steema.TeeChart.Styles.CustomError.Add(System.Double,System.Double,System.Double,System.String)">
            <summary>
            Adds a new Error Bar point to the Series with label.
            </summary>
        </member>
        <member name="M:Steema.TeeChart.Styles.CustomError.Add(System.Double,System.Double,System.Double)">
            <summary>
            Adds a new Error Bar point to the Series.
            </summary>
        </member>
        <member name="M:Steema.TeeChart.Styles.CustomError.Add(System.Double,System.Double,System.Double,System.Drawing.Color)">
            <summary>
            Adds a new Error Bar point to the Series in selected color.
            </summary>
        </member>
        <member name="M:Steema.TeeChart.Styles.CustomError.AddValue(System.Double,System.Double)">
             <summary>
            Adds a new Error Bar point to the Series. 
             </summary>
             <returns><see cref="T:Steema.TeeChart.Styles.ValueList"/> index of added point</returns>
        </member>
        <member name="M:Steema.TeeChart.Styles.CustomError.DrawBar(System.Int32,System.Int32,System.Int32)">
             <summary>
            Displays an ErrorBar point ( BarIndex point ) using the Start and End pixel coordinates. 
             </summary>
        </member>
        <member name="M:Steema.TeeChart.Styles.CustomError.MaxYValue">
            <summary>
            Returns the Maximum Value of the Series Y Values List.
            </summary>
        </member>
        <member name="M:Steema.TeeChart.Styles.CustomError.MinYValue">
            <summary>
            Returns the Minimum Value of the Series Y Values List.
            </summary>
        </member>
        <member name="M:Steema.TeeChart.Styles.CustomError.Clicked(System.Int32,System.Int32)">
            <summary>
            Returns the ValueIndex of the "clicked" point in the Series.
            </summary>
        </member>
        <member name="P:Steema.TeeChart.Styles.CustomError.ErrorValues">
            <summary>
            Gets and sets the corresponding Error value for each Bar.
            </summary>
        </member>
        <member name="P:Steema.TeeChart.Styles.CustomError.ErrorPen">
            <summary>
            Defines Pen to draw Error "T" on top of Error Bars.
            </summary>
        </member>
        <member name="P:Steema.TeeChart.Styles.CustomError.ErrorStyle">
            <summary>
            Defines the Error Series Style according to EErrorSeriesStyle.
            </summary>
        </member>
        <member name="P:Steema.TeeChart.Styles.CustomError.ErrorWidthUnits">
            <summary>
            Sets ErrorWidth in pixels or percentage of Bar width.
            </summary>
        </member>
        <member name="P:Steema.TeeChart.Styles.CustomError.ErrorWidth">
            <summary>
            Determines the horizontal size of the Error "T".
            </summary>
        </member>
        <member name="T:Steema.TeeChart.Styles.Error">
            <summary>
            ErrorSeries Series.
            </summary>
        </member>
        <member name="T:Steema.TeeChart.Styles.ErrorBar">
            <summary>
            ErrorBar Series.
            </summary>
        </member>
        <member name="P:Steema.TeeChart.Styles.ErrorBar.Description">
            <summary>
            Gets descriptive text.
            </summary>
        </member>
        <member name="M:Steema.TeeChart.Editors.Tools.DrawLineEditor.Dispose(System.Boolean)">
            <summary>
            Clean up any resources being used.
            </summary>
        </member>
        <member name="M:Steema.TeeChart.Editors.Tools.DrawLineEditor.InitializeComponent">
            <summary>
            Required method for Designer support - do not modify
            the contents of this method with the code editor.
            </summary>
        </member>
        <member name="M:Steema.TeeChart.Editors.Tools.ColorBandEditor.Dispose(System.Boolean)">
            <summary>
            Clean up any resources being used.
            </summary>
        </member>
        <member name="M:Steema.TeeChart.Editors.Tools.ColorBandEditor.InitializeComponent">
            <summary>
            Required method for Designer support - do not modify
            the contents of this method with the code editor.
            </summary>
        </member>
        <member name="T:Steema.TeeChart.Editors.Series.Vector3DSeries">
            <summary>
            Summary description for Vector3DEditor.
            </summary>
        </member>
        <member name="F:Steema.TeeChart.Editors.Series.Vector3DSeries.components">
            <summary>
            Required designer variable.
            </summary>
        </member>
        <member name="M:Steema.TeeChart.Editors.Series.Vector3DSeries.Dispose(System.Boolean)">
            <summary>
            Clean up any resources being used.
            </summary>
        </member>
        <member name="M:Steema.TeeChart.Editors.Series.Vector3DSeries.InitializeComponent">
            <summary>
            Required method for Designer support - do not modify
            the contents of this method with the code editor.
            </summary>
        </member>
        <member name="T:Steema.TeeChart.Editors.Series.StackBarSeries">
            <summary>
            Summary description for StackBarEdit.
            </summary>
        </member>
        <member name="F:Steema.TeeChart.Editors.Series.StackBarSeries.components">
            <summary>
            Required designer variable.
            </summary>
        </member>
        <member name="M:Steema.TeeChart.Editors.Series.StackBarSeries.Dispose(System.Boolean)">
            <summary>
            Clean up any resources being used.
            </summary>
        </member>
        <member name="M:Steema.TeeChart.Editors.Series.StackBarSeries.InitializeComponent">
            <summary>
            Required method for Designer support - do not modify
            the contents of this method with the code editor.
            </summary>
        </member>
        <member name="T:Steema.TeeChart.Editors.Series.ImageBarSeries">
            <summary>
            Image Bar series editor
            </summary>
        </member>
        <member name="F:Steema.TeeChart.Editors.Series.ImageBarSeries.components">
            <summary>
            Required designer variable.
            </summary>
        </member>
        <member name="M:Steema.TeeChart.Editors.Series.ImageBarSeries.Dispose(System.Boolean)">
            <summary>
            Clean up any resources being used.
            </summary>
        </member>
        <member name="M:Steema.TeeChart.Editors.Series.ImageBarSeries.InitializeComponent">
            <summary>
            Required method for Designer support - do not modify
            the contents of this method with the code editor.
            </summary>
        </member>
        <member name="T:Steema.TeeChart.Editors.Series.DonutSeries">
            <summary>
            Summary description for DonutEdit.
            </summary>
        </member>
        <member name="F:Steema.TeeChart.Editors.Series.DonutSeries.components">
            <summary>
            Required designer variable.
            </summary>
        </member>
        <member name="M:Steema.TeeChart.Editors.Series.DonutSeries.Dispose(System.Boolean)">
            <summary>
            Clean up any resources being used.
            </summary>
        </member>
        <member name="M:Steema.TeeChart.Editors.Series.DonutSeries.InitializeComponent">
            <summary>
            Required method for Designer support - do not modify
            the contents of this method with the code editor.
            </summary>
        </member>
        <member name="T:Steema.TeeChart.Editors.Series.BezierSeries">
            <summary>
            Summary description for BezierEditor.
            </summary>
        </member>
        <member name="F:Steema.TeeChart.Editors.Series.BezierSeries.components">
            <summary>
            Required designer variable.
            </summary>
        </member>
        <member name="M:Steema.TeeChart.Editors.Series.BezierSeries.Dispose(System.Boolean)">
            <summary>
            Clean up any resources being used.
            </summary>
        </member>
        <member name="M:Steema.TeeChart.Editors.Series.BezierSeries.InitializeComponent">
            <summary>
            Required method for Designer support - do not modify
            the contents of this method with the code editor.
            </summary>
        </member>
        <member name="T:Steema.TeeChart.Editors.SelectListForm">
            <summary>
            Generic Selection form.
            </summary>
        </member>
        <member name="F:Steema.TeeChart.Editors.SelectListForm.components">
            <summary>
            Required designer variable.
            </summary>
        </member>
        <member name="M:Steema.TeeChart.Editors.SelectListForm.Dispose(System.Boolean)">
            <summary>
            Clean up any resources being used.
            </summary>
        </member>
        <member name="M:Steema.TeeChart.Editors.SelectListForm.InitializeComponent">
            <summary>
            Required method for Designer support - do not modify
            the contents of this method with the code editor.
            </summary>
        </member>
        <member name="T:Steema.TeeChart.Editors.AboutBox">
            <summary>
            Summary description for AboutBox.
            </summary>
        </member>
        <member name="M:Steema.TeeChart.Editors.AboutBox.Dispose(System.Boolean)">
            <summary>
            Clean up any resources being used.
            </summary>
        </member>
        <member name="M:Steema.TeeChart.Editors.AboutBox.InitializeComponent">
            <summary>
            Required method for Designer support - do not modify
            the contents of this method with the code editor.
            </summary>
        </member>
        <member name="T:Steema.TeeChart.Drawing.Aspect">
            <summary>
            Chart view characteristics
            </summary>
        </member>
        <member name="M:Steema.TeeChart.Drawing.Aspect.Assign(Steema.TeeChart.Drawing.Aspect)">
            <summary>
            Copies all properties from a Series component to another.
            </summary>
        </member>
        <member name="P:Steema.TeeChart.Drawing.Aspect.Rotation">
            <summary>
            Gets or sets the angle in degrees of 3D rotation.
            </summary>
        </member>
        <member name="P:Steema.TeeChart.Drawing.Aspect.RotationFloat">
            <summary>
            Gets or sets the angle, as Float, in degrees of 3D rotation.
            </summary>
        </member>
        <member name="P:Steema.TeeChart.Drawing.Aspect.Elevation">
            <summary>
            Gets or sets the angle in degrees of 3D elevation.
            </summary>
        </member>
        <member name="P:Steema.TeeChart.Drawing.Aspect.ElevationFloat">
            <summary>
            Gets or sets the angle, as float, in degrees of 3D elevation.
            </summary>
        </member>
        <member name="P:Steema.TeeChart.Drawing.Aspect.Tilt">
            <summary>
            Gets or sets the angle in degrees of 3D tilt.
            </summary>
        </member>
        <member name="P:Steema.TeeChart.Drawing.Aspect.ApplyZOrder">
            <summary>
            When True, multiple Series are displayed at a different 3D "Z" (depth) position.
            </summary>
        </member>
        <member name="P:Steema.TeeChart.Drawing.Aspect.ClipPoints">
            <summary>
            When True, restricts Series points to display outside the Chart axes rectangle.
            </summary>
        </member>
        <member name="P:Steema.TeeChart.Drawing.Aspect.Orthogonal">
            <summary>
            When True, displays in semi-3D mode.
            </summary>
        </member>
        <member name="P:Steema.TeeChart.Drawing.Aspect.SmoothingMode">
            <summary>
            Chooses between speed or display quality.
            </summary>
        </member>
        <member name="P:Steema.TeeChart.Drawing.Aspect.TextRenderingHint">
            <summary>
            Chooses between speed or display quality for Text rendering.
            </summary>
        </member>
        <member name="P:Steema.TeeChart.Drawing.Aspect.ZoomFloat">
            <summary>
            Percent of zoom in 3D mode.
            <seealso cref="P:Steema.TeeChart.Drawing.Aspect.View3D"/>
            </summary>
        </member>
        <member name="P:Steema.TeeChart.Drawing.Aspect.Zoom">
            <summary>
            Percent of zoom in 3D mode.
            <seealso cref="P:Steema.TeeChart.Drawing.Aspect.View3D"/>
            </summary>
        </member>
        <member name="P:Steema.TeeChart.Drawing.Aspect.ColorPaletteIndex">
             <summary>
            Stores the Index of the ColorPalette used in the Chart. 
             </summary>
        </member>
        <member name="P:Steema.TeeChart.Drawing.Aspect.Perspective">
            <summary>
            Percent of 3D perspective
            </summary>
        </member>
        <member name="P:Steema.TeeChart.Drawing.Aspect.OrthoAngle">
            <summary>
            Angle in degrees, from 0 to 90, when displaying in Orthogonal mode.
            <seealso cref="P:Steema.TeeChart.Drawing.Aspect.Orthogonal"/>
            </summary>
        </member>
        <member name="P:Steema.TeeChart.Drawing.Aspect.Chart3DPercent">
            <summary>
            Percent from 0 to 100 of Z Depth.
            </summary>
        </member>
        <member name="P:Steema.TeeChart.Drawing.Aspect.HorizOffset">
            <summary>
            Amount (postive or negative) in pixels of horizontal displacement.
            </summary>
        </member>
        <member name="P:Steema.TeeChart.Drawing.Aspect.HorizOffsetFloat">
            <summary>
            Amount (postive or negative) in pixels of horizontal displacement.
            </summary>
        </member>
        <member name="P:Steema.TeeChart.Drawing.Aspect.VertOffset">
            <summary>
            Amount (postive or negative) in pixels of vertical displacement.
            </summary>
        </member>
        <member name="P:Steema.TeeChart.Drawing.Aspect.VertOffsetFloat">
            <summary>
            Amount (postive or negative) in pixels of vertical displacement.
            </summary>
        </member>
        <member name="P:Steema.TeeChart.Drawing.Aspect.View3D">
            <summary>
            Gets or sets 3D display mode.
            <seealso cref="P:Steema.TeeChart.Drawing.Aspect.Orthogonal"/>
            </summary>
        </member>
        <member name="P:Steema.TeeChart.Drawing.Aspect.ZoomText">
            <summary>
            When True, all texts are resized according to Zoom property.
            </summary>
        </member>
        <member name="T:Steema.TeeChart.Drawing.PointDouble">
            <summary>
            XY Point holder
            </summary>
        </member>
        <member name="T:Steema.TeeChart.Drawing.PointXYZ">
            <summary>
            XYZ Point holder
            </summary>
        </member>
        <member name="P:Steema.TeeChart.Drawing.PointXYZ.X">
            <summary>
            This property gets or sets the X location in pixels.
            </summary>
        </member>
        <member name="P:Steema.TeeChart.Drawing.PointXYZ.Y">
            <summary>
            This property gets or sets the Y location in pixels.
            </summary>
        </member>
        <member name="P:Steema.TeeChart.Drawing.PointXYZ.Z">
            <summary>
            This property gets or sets the Z location in pixels.
            </summary>
        </member>
        <member name="T:Steema.TeeChart.Drawing.Point3DDouble">
            <summary>
            XYZ Point Holder
            </summary>
        </member>
        <member name="T:Steema.TeeChart.Drawing.Point3D">
            <summary>
            XYZ Point Holder
            </summary>
        </member>
        <member name="T:Steema.TeeChart.Drawing.Triangle3D">
            <summary>
            Triangular 3D element holder
            </summary>
        </member>
        <member name="T:Steema.TeeChart.Drawing.Triangle2D">
            <summary>
            Triangular 2D element holder
            </summary>
        </member>
        <member name="T:Steema.TeeChart.Drawing.ThreeDPlane">
            <summary>
            orientation
            </summary>
        </member>
        <member name="T:Steema.TeeChart.Drawing.BufferStyle">
            <summary>
            The type of double buffered applied during Chart drawing.
            </summary>
        </member>
        <member name="F:Steema.TeeChart.Drawing.BufferStyle.None">
            <summary>
            No double-buffering.
            </summary>
        </member>
        <member name="F:Steema.TeeChart.Drawing.BufferStyle.DoubleBuffer">
            <summary>
            Double buffering built into the System.Windows.Forms.ControlStyles enum.
            </summary>
        </member>
        <member name="F:Steema.TeeChart.Drawing.BufferStyle.OptimizedBuffer">
            <summary>
            Manually implemented, fully optimal double-buffering.
            </summary>
        </member>
        <member name="T:Steema.TeeChart.Drawing.ChartBrush">
            <summary>
            Common Chart Brush
            </summary>
        </member>
        <member name="M:Steema.TeeChart.Drawing.ChartBrush.LoadImage(System.String)">
            <summary>
            Loads a bitmap into a ChartBrush element from the specified path.
            </summary>
        </member>
        <member name="M:Steema.TeeChart.Drawing.ChartBrush.ClearImage">
            <summary>
            Clears the IBrush element from all associated bitmap images.
            </summary>
        </member>
        <member name="P:Steema.TeeChart.Drawing.ChartBrush.Transparency">
            <summary>
            Sets Transparency level from 0 to 100%.
            </summary>
        </member>
        <member name="P:Steema.TeeChart.Drawing.ChartBrush.Solid">
            <summary>
            Fills using Color only. Does not use Foreground color.
            </summary>
        </member>
        <member name="P:Steema.TeeChart.Drawing.ChartBrush.ImageTransparent">
            <summary>
            Sets the Brush image to Transparent.
            </summary>
        </member>
        <member name="P:Steema.TeeChart.Drawing.ChartBrush.Gradient">
            <summary>
            Fill Gradient.
            </summary>
        </member>
        <member name="P:Steema.TeeChart.Drawing.ChartBrush.DrawingBrush">
            <summary>
            Accesses the internal Drawing.Brush
            </summary>
        </member>
        <member name="P:Steema.TeeChart.Drawing.ChartBrush.ImageMode">
            <summary>
            Drawing Brush Image Style.
            </summary>
        </member>
        <member name="P:Steema.TeeChart.Drawing.ChartBrush.WrapMode">
            <summary>
            Drawing Brush Image Style.
            </summary>
        </member>
        <member name="P:Steema.TeeChart.Drawing.ChartBrush.ForegroundColor">
            <summary>
            Color to fill inner portions of Brush, when Solid is false.
            </summary>
        </member>
        <member name="P:Steema.TeeChart.Drawing.ChartBrush.Color">
            <summary>
            Determines the color used to fill a zone.
            </summary>
        </member>
        <member name="P:Steema.TeeChart.Drawing.ChartBrush.Visible">
            <summary>
            Empty of Brush when False.
            </summary>
        </member>
        <member name="P:Steema.TeeChart.Drawing.ChartBrush.Style">
            <summary>
            Determines the style in which the zone is filled or patterned.
            </summary>
        </member>
        <member name="P:Steema.TeeChart.Drawing.ChartBrush.Image">
            <summary>
            Image to use for fill.
            </summary>
        </member>
        <member name="P:Steema.TeeChart.Drawing.GradientStyle.CenterYOffset">
            <summary>
            The Y pixel offset from the center of the non-linear gradient.
            </summary>
        </member>
        <member name="P:Steema.TeeChart.Drawing.GradientStyle.CenterXOffset">
            <summary>
            The X pixel offset from the center of the non-linear gradient.
            </summary>
        </member>
        <member name="P:Steema.TeeChart.Drawing.GradientStyle.Visible">
            <summary>
            When true, applies the specified non-linear gradient style.
            </summary>
        </member>
        <member name="P:Steema.TeeChart.Drawing.GradientStyle.Direction">
            <summary>
            Specifies the direction the non-linear gradient fill will be applied.
            </summary>
        </member>
        <member name="T:Steema.TeeChart.Drawing.Gradient">
            <summary>
            Properties to configure a gradient filling.
            </summary>
        </member>
        <member name="M:Steema.TeeChart.Drawing.Gradient.AssignGradient(Steema.TeeChart.Drawing.Gradient)">
            <summary>
            Copies the Gradient parameter properties into the Canvas.Gradient object.
            </summary>
        </member>
        <member name="M:Steema.TeeChart.Drawing.Gradient.DrawingBrush(System.Drawing.PointF[])">
            <summary>
            Brush to fill area bounded by Points p
            </summary>
        </member>
        <member name="M:Steema.TeeChart.Drawing.Gradient.DrawingBrush(System.Drawing.Point[])">
            <summary>
            Brush to fill area bounded by Points p
            </summary>
        </member>
        <member name="M:Steema.TeeChart.Drawing.Gradient.DrawingBrush(System.Drawing.Size)">
            <summary>
            Uses the x,y point co-ordinate define the Brush for a 'size' square
            </summary>
        </member>
        <member name="M:Steema.TeeChart.Drawing.Gradient.DrawingBrush(System.Drawing.Rectangle)">
            <summary>
            Brush to fill rectangular area rect
            </summary> 
        </member>
        <member name="M:Steema.TeeChart.Drawing.Gradient.Draw(Steema.TeeChart.Drawing.Graphics3D,System.Int32,System.Int32,System.Int32,System.Int32)">
            <summary>
            Fills the Canvas area using the Gradient color and direction properties.
            </summary>
        </member>
        <member name="M:Steema.TeeChart.Drawing.Gradient.Draw(Steema.TeeChart.Drawing.Graphics3D,System.Drawing.Point[])">
            <summary>
            Fills the Canvas area using the Gradient color and direction properties.
            </summary>
        </member>
        <member name="M:Steema.TeeChart.Drawing.Gradient.Draw(Steema.TeeChart.Drawing.Graphics3D,System.Drawing.Rectangle)">
            <summary>
            Fills the Canvas area using the Gradient color and direction properties.
            </summary>
        </member>
        <member name="P:Steema.TeeChart.Drawing.Gradient.WrapMode">
            <summary>
            Used to repeat fillings.
            </summary>
        </member>
        <member name="P:Steema.TeeChart.Drawing.Gradient.Transparency">
            <summary>
            Amount of transparency in percentage.
            </summary>
        </member>
        <member name="P:Steema.TeeChart.Drawing.Gradient.Angle">
            <summary>
            Enables fine-tuning of displayed Colors.
            </summary>
        </member>
        <member name="P:Steema.TeeChart.Drawing.Gradient.SigmaFocus">
            <summary>
            Ratio between Start and End Colors.
            </summary>
        </member>
        <member name="P:Steema.TeeChart.Drawing.Gradient.SigmaScale">
            <summary>
            Ratio between Colors, from 0 to 1.
            </summary>
        </member>
        <member name="P:Steema.TeeChart.Drawing.Gradient.Sigma">
            <summary>
            Enables use of SigmaFocus and SigmaScale.
            </summary>
        </member>
        <member name="P:Steema.TeeChart.Drawing.Gradient.GammaCorrection">
            <summary>
            Enables fine-tuning of displayed Colors.
            </summary>
        </member>
        <member name="P:Steema.TeeChart.Drawing.Gradient.Style">
            <summary>
            Specifies the direction the gradient fill will be applied.
            </summary>
        </member>
        <member name="P:Steema.TeeChart.Drawing.Gradient.ExtendedColorPalette">
            <summary>
            Assign a color array to this property to use more than three colors (end, start and middle) in a Gradient.
            </summary>
        </member>
        <member name="P:Steema.TeeChart.Drawing.Gradient.CustomTargetRectangle">
            <summary>
            Assign a rectangle to this property to define a custom rectangle to a Gradient.
            </summary>
        </member>
        <member name="P:Steema.TeeChart.Drawing.Gradient.CustomTargetPolygon">
            <summary>
            Assign a rectangle to this property to define a custom rectangle to a Gradient.
            </summary>
        </member>
        <member name="P:Steema.TeeChart.Drawing.Gradient.Direction">
            <summary>
            Specifies the direction the gradient fill will be applied.
            </summary>
        </member>
        <member name="P:Steema.TeeChart.Drawing.Gradient.StartColor">
            <summary>
            One of the three Colors used to create the gradient fill.
            </summary>
        </member>
        <member name="P:Steema.TeeChart.Drawing.Gradient.UseMiddle">
            <summary>
            Determines whether MiddleColor is used when creating the gradient fill, or not.
            </summary>
        </member>
        <member name="P:Steema.TeeChart.Drawing.Gradient.MiddleColor">
            <summary>
            One of the three Colors used to create the gradient fill.
            </summary>
        </member>
        <member name="P:Steema.TeeChart.Drawing.Gradient.EndColor">
            <summary>
            One of the three Colors used to create the gradient fill.
            </summary>
        </member>
        <member name="P:Steema.TeeChart.Drawing.Gradient.Visible">
            <summary>
            Determines whether the gradient fill appears on screen.
            </summary>
        </member>
        <member name="T:Steema.TeeChart.Drawing.ChartFont">
            <summary>
            Common Chart Font
            </summary>
        </member>
        <member name="P:Steema.TeeChart.Drawing.ChartFont.Name">
            <summary>
            Defines a Font type for text.
            </summary>
        </member>
        <member name="P:Steema.TeeChart.Drawing.ChartFont.Size">
            <summary>
            Sets Font sizing (in points) for text.
            </summary>
        </member>
        <member name="P:Steema.TeeChart.Drawing.ChartFont.SizeFloat">
            <summary>
            Sets Font sizing as em-size float for text to enable use of Font.Unit
            </summary>
        </member>
        <member name="P:Steema.TeeChart.Drawing.ChartFont.Unit">
            <summary>
            Gets the unit of measure for this Font
            </summary>
        </member>
        <member name="P:Steema.TeeChart.Drawing.ChartFont.Bold">
            <summary>
            Sets Font bold for text.
            </summary>
        </member>
        <member name="P:Steema.TeeChart.Drawing.ChartFont.Italic">
            <summary>
            Sets Font italic (true or false) for text.
            </summary>
        </member>
        <member name="P:Steema.TeeChart.Drawing.ChartFont.UsePrivateFont">
            <summary>
            Sets or returns whether to include TeeChart's private fonts in the ChartFont class.
            </summary>
        </member>
        <member name="P:Steema.TeeChart.Drawing.ChartFont.Underline">
            <summary>
            Sets Font underline on/off.
            </summary>
        </member>
        <member name="P:Steema.TeeChart.Drawing.ChartFont.Strikeout">
            <summary>
            Sets Font Strikeout on/off.
            </summary>
        </member>
        <member name="P:Steema.TeeChart.Drawing.ChartFont.Color">
            <summary>
            Defines a Font colour for text.
            </summary>
        </member>
        <member name="P:Steema.TeeChart.Drawing.ChartFont.Gradient">
            <summary>
            Applies a gradient fill to the font.
            </summary>
        </member>
        <member name="P:Steema.TeeChart.Drawing.ChartFont.Shadow">
            <summary>
            Accesses the shadow properties of the font.
            </summary>
        </member>
        <member name="P:Steema.TeeChart.Drawing.ChartFont.Brush">
            <summary>
            Sets the Brush characteristics of the font. 
            </summary>
        </member>
        <member name="T:Steema.TeeChart.Drawing.ChartPen">
            <summary>
            Common Chart Pen
            </summary>
        </member>
        <member name="M:Steema.TeeChart.Drawing.ChartPen.CreateNewChartPen(Steema.TeeChart.Chart,System.Type)">
            <summary>
            Creates a new ChartPen object and sets the Chart property.
            </summary>
        </member>
        <member name="M:Steema.TeeChart.Drawing.ChartPen.NewFromType(System.Type)">
             <summary>
            Creates a new ChartPen from the System.Type of an existing ChartPen object. 
             </summary>
        </member>
        <member name="P:Steema.TeeChart.Drawing.ChartPen.Color">
            <summary>
            Determines the color used by the pen to draw lines on the Drawing.
            </summary>
        </member>
        <member name="P:Steema.TeeChart.Drawing.ChartPen.Visible">
            <summary>
            Determines if the pen will draw lines or not.
            </summary>
        </member>
        <member name="P:Steema.TeeChart.Drawing.ChartPen.Transparency">
            <summary>
            Sets Transparency level from 0 to 100%.
            </summary>
        </member>
        <member name="P:Steema.TeeChart.Drawing.ChartPen.DrawingPen">
            <summary>
            Accesses the internal Drawing.Pen object.
            </summary>
        </member>
        <member name="P:Steema.TeeChart.Drawing.ChartPen.EndCap">
            <summary>
            Style of line endings.
            </summary>
        </member>
        <member name="P:Steema.TeeChart.Drawing.ChartPen.DashCap">
            <summary>
            Defines segment ending style of dashed lines.
            </summary>
        </member>
        <member name="P:Steema.TeeChart.Drawing.ChartPen.Width">
            <summary>
            Determines the width of lines the pen draws.
            </summary>
        </member>
        <member name="P:Steema.TeeChart.Drawing.ChartPen.UseStyling">
            <summary>
            Set to false to make ChartPen ignore Style, DashCap, DashPattern and EndCap properties. Useful as a performance micro-optimization.
            </summary>
        </member>
        <member name="P:Steema.TeeChart.Drawing.ChartPen.Style">
            <summary>
            Determines the style in which the pen draw lines on the Drawing.
            </summary>
        </member>
        <member name="T:Steema.TeeChart.Drawing.EdgeStyles">
             <summary>
            Defines the styles of the edges between two adjacent surfaces.
             </summary>
        </member>
        <member name="F:Steema.TeeChart.Drawing.EdgeStyles.Flat">
            <summary>
            Flat Edges
            </summary>
        </member>
        <member name="F:Steema.TeeChart.Drawing.EdgeStyles.Curved">
            <summary>
            Curved Edges
            </summary>
        </member>
        <member name="F:Steema.TeeChart.Drawing.EdgeStyles.None">
            <summary>
            No special edge treament.
            </summary>
        </member>
        <member name="T:Steema.TeeChart.Drawing.BevelStyles">
             <summary>
            Defines the styles of the bevels (frames) around rectangles.
             </summary>
        </member>
        <member name="F:Steema.TeeChart.Drawing.BevelStyles.None">
             <summary>
            No bevel.
             </summary>
        </member>
        <member name="F:Steema.TeeChart.Drawing.BevelStyles.Lowered">
             <summary>
            Lowered bevel.
             </summary>
        </member>
        <member name="F:Steema.TeeChart.Drawing.BevelStyles.Raised">
             <summary>
            Raised bevel. 
             </summary>
        </member>
        <member name="T:Steema.TeeChart.Drawing.Bevel">
            <summary>
            Properties to display bevels (frames) around rectangles.
            </summary>
        </member>
        <member name="M:Steema.TeeChart.Drawing.Bevel.Assign(Steema.TeeChart.Drawing.Bevel)">
            <summary>
            Assign all properties from a bevel to another.
            </summary>
        </member>
        <member name="M:Steema.TeeChart.Drawing.Bevel.Draw(Steema.TeeChart.Drawing.Graphics3D,System.Drawing.Rectangle)">
            <summary>
            Draws bevels around rectangle parameter.
            </summary>
        </member>
        <member name="P:Steema.TeeChart.Drawing.Bevel.Inner">
            <summary>
            Style for inner bevel.
            </summary>
        </member>
        <member name="P:Steema.TeeChart.Drawing.Bevel.Width">
            <summary>
            Size in pixels for bevels.
            </summary>
        </member>
        <member name="P:Steema.TeeChart.Drawing.Bevel.ColorOne">
            <summary>
            Color of left and top sides of bevels.
            </summary>
        </member>
        <member name="P:Steema.TeeChart.Drawing.Bevel.ColorTwo">
            <summary>
            Color of right and bottom sides of bevels.
            </summary>
        </member>
        <member name="P:Steema.TeeChart.Drawing.Bevel.Outer">
            <summary>
            Style for outer bevel.
            </summary>
        </member>
        <member name="T:Steema.TeeChart.Drawing.ImageBevel">
            <summary>
            Properties to display bevels (frames) around rectangles.
            </summary>
        </member>
        <member name="M:Steema.TeeChart.Drawing.ImageBevel.Assign(Steema.TeeChart.Drawing.ImageBevel)">
            <summary>
            Assign all properties from a bevel to another.
            </summary>
        </member>
        <member name="M:Steema.TeeChart.Drawing.ImageBevel.Draw(Steema.TeeChart.Drawing.Graphics3D,System.Drawing.Rectangle,System.Int32)">
            <summary>
            Draws bevels around rectangle parameter.
            </summary>
        </member>
        <member name="P:Steema.TeeChart.Drawing.ImageBevel.Width">
            <summary>
            Draws an Image Bevel of the specified width.
            </summary>
        </member>
        <member name="P:Steema.TeeChart.Drawing.ImageBevel.Visible">
            <summary>
            Sets the visibility of the Image Bevel.
            </summary>
        </member>
        <member name="P:Steema.TeeChart.Drawing.ImageBevel.Pen">
            <summary>
            Sets ImageBevel Pen characteristics.
            </summary>
        </member>
        <member name="P:Steema.TeeChart.Drawing.ImageBevel.Brush">
            <summary>
            Sets ImageBevel Brush characteristics.
            </summary>
        </member>
        <member name="T:Steema.TeeChart.Drawing.ImageMode">
            <summary>
            Display characteristics for an Image
            </summary>
        </member>
        <member name="F:Steema.TeeChart.Drawing.ImageMode.Normal">
            <summary>Display unmodfied</summary>
        </member>
        <member name="F:Steema.TeeChart.Drawing.ImageMode.Stretch">
            <summary>Stretch to bounding area dimensions</summary>
        </member>
        <member name="F:Steema.TeeChart.Drawing.ImageMode.Tile">
            <summary>Repeat Tile small image over larger bounding area</summary>
        </member>
        <member name="F:Steema.TeeChart.Drawing.ImageMode.Center">
            <summary>Place unmodified image at Center of bounding area</summary>
        </member>
        <member name="T:Steema.TeeChart.Drawing.Shape">
            <summary>
            Base class for Chart Shape elements
            </summary>
        </member>
        <member name="M:Steema.TeeChart.Drawing.Shape.Assign(Steema.TeeChart.Drawing.Shape)">
            <summary>
            Assign all properties from a shape to another.
            </summary>
        </member>
        <member name="M:Steema.TeeChart.Drawing.Shape.CreateNewShape(Steema.TeeChart.Chart,System.Type)">
            <summary>
            Creates a new Shape object and sets the Chart property.
            </summary>
        </member>
        <member name="M:Steema.TeeChart.Drawing.Shape.NewFromType(System.Type)">
             <summary>
            Creates a new series from the System.Type of an existing series object. 
             </summary>
        </member>
        <member name="P:Steema.TeeChart.Drawing.Shape.ShapeBounds">
            <summary>
            Defines the boundaries of the Shape.
            </summary>
        </member>
        <member name="P:Steema.TeeChart.Drawing.Shape.ImageBevel">
            <summary>
            Sets the bevel characteristics of the Shape.
            </summary>
        </member>
        <member name="P:Steema.TeeChart.Drawing.Shape.Bevel">
            <summary>
            Sets the bevel characteristics of the Shape.
            </summary>
        </member>
        <member name="P:Steema.TeeChart.Drawing.Shape.Shadow">
            <summary>
            Defines the shape's Shadow characteristics.
            </summary>
        </member>
        <member name="P:Steema.TeeChart.Drawing.Shape.Brush">
            <summary>
            Defines the kind of brush used to fill shape background.
            </summary>
        </member>
        <member name="P:Steema.TeeChart.Drawing.Shape.BorderRound">
            <summary>
            Rounds the Borders of the Chart Shapes.
            </summary>
            <example> This sample shows how to use the BorderRound property:
            <code>
            private void numericUpDown1_ValueChanged(object sender, System.EventArgs e) {
            	tChart1.Panel.BorderRound = (int)numericUpDown1.Value;
            }
            </code>
            </example>
        </member>
        <member name="P:Steema.TeeChart.Drawing.Shape.Height">
            <summary>
            The Height of the shape.
            </summary>
        </member>
        <member name="P:Steema.TeeChart.Drawing.Shape.Width">
            <summary>
            The Width of the shape.
            </summary>
        </member>
        <member name="P:Steema.TeeChart.Drawing.Shape.Image">
            <summary>
            Rendered Image for Shape background
            </summary>
        </member>
        <member name="P:Steema.TeeChart.Drawing.Shape.ImageMode">
            <summary>
            ImageMode for rendered Shape background Image
            </summary>
        </member>
        <member name="P:Steema.TeeChart.Drawing.Shape.ImageTransparent">
            <summary>
            Sets the shape image to transparent.
            </summary>
        </member>
        <member name="P:Steema.TeeChart.Drawing.Shape.Color">
            <summary>
            Defines the shape Color.
            </summary>
        </member>
        <member name="P:Steema.TeeChart.Drawing.Shape.Gradient">
            <summary>
            Calls the  Gradient characteristics for the shape.
            </summary>
        </member>
        <member name="P:Steema.TeeChart.Drawing.Shape.Visible">
            <summary>
            Shows or hides the Shape.
            </summary>
        </member>
        <member name="P:Steema.TeeChart.Drawing.Shape.Transparent">
            <summary>
            Enables/disables transparency of shape. 
            </summary>
        </member>
        <member name="P:Steema.TeeChart.Drawing.Shape.Pen">
            <summary>
            Specifies the pen used to draw the shape.
            </summary>
        </member>
        <member name="P:Steema.TeeChart.Drawing.Shape.Left">
            <summary>
            Shape rectangle left co-ordinate
            </summary>
        </member>
        <member name="P:Steema.TeeChart.Drawing.Shape.Top">
            <summary>
            Shape rectangle top co-ordinate
            </summary>
        </member>
        <member name="P:Steema.TeeChart.Drawing.Shape.Right">
            <summary>
            Shape rectangle right co-ordinate
            </summary>
        </member>
        <member name="P:Steema.TeeChart.Drawing.Shape.Bottom">
            <summary>
            Shape rectangle bottom co-ordinate
            </summary>
        </member>
        <member name="P:Steema.TeeChart.Drawing.Shape.Transparency">
            <summary>
            Sets Transparency level from 0 to 100% of shape.
            </summary>
        </member>
        <member name="T:Steema.TeeChart.Drawing.ShapeSize">
            <summary>
            Size holder
            </summary>
        </member>
        <member name="T:Steema.TeeChart.Drawing.TextShapeStyle">
             <summary>
            Defines the style of text-containing shapes.
             </summary>
        </member>
        <member name="F:Steema.TeeChart.Drawing.TextShapeStyle.Rectangle">
             <summary>
            Defines a Rectangular shape. 
             </summary>
        </member>
        <member name="F:Steema.TeeChart.Drawing.TextShapeStyle.RoundRectangle">
             <summary>
            Defines a Rounded Rectangular shape. 
             </summary>
        </member>
        <member name="T:Steema.TeeChart.Drawing.TextShape">
            <summary>
            Base class for Chart shape elements with text
            </summary>
        </member>
        <member name="M:Steema.TeeChart.Drawing.TextShape.Assign(Steema.TeeChart.Drawing.TextShape)">
            <summary>
            Assign all properties from a TextShape to another.
            </summary>
        </member>
        <member name="M:Steema.TeeChart.Drawing.TextShape.Paint">
            <summary>
            Paints the TextShape object on the Chart Canvas.
            </summary>
        </member>
        <member name="M:Steema.TeeChart.Drawing.TextShape.Paint(Steema.TeeChart.Drawing.Graphics3D)">
            <summary>
            Paints the TextShape object on the Chart Canvas.
            </summary>
        </member>
        <member name="M:Steema.TeeChart.Drawing.TextShape.Paint(Steema.TeeChart.Drawing.Graphics3D,System.Drawing.Rectangle)">
            <summary>
            Paints the TextShape object on the Chart Canvas.
            </summary>
        </member>
        <member name="M:Steema.TeeChart.Drawing.TextShape.DrawRectRotated(Steema.TeeChart.Drawing.Graphics3D,System.Drawing.Rectangle,System.Int32,System.Int32)">
            <summary>
            Draws the Shape rectangle rotated by Angle degrees.
            </summary>
        </member>
        <member name="P:Steema.TeeChart.Drawing.TextShape.ShapeStyle">
            <summary>
            Shape may be rectagular or rounded rectangular.
            </summary>
        </member>
        <member name="P:Steema.TeeChart.Drawing.TextShape.TextFormat">
            <summary>
            Determines if Text is drawn as Normal or HTML styles.
            </summary>
        </member>
        <member name="P:Steema.TeeChart.Drawing.TextShape.Text">
            <summary>
            The Text property is used to display customized strings inside Shapes.
            </summary>
        </member>
        <member name="P:Steema.TeeChart.Drawing.TextShape.Lines">
            <summary>
            Access to array of Text lines
            </summary>
        </member>
        <member name="P:Steema.TeeChart.Drawing.TextShape.Font">
            <summary>
            Determines the font attributes used to output ShapeSeries.Text strings.
            </summary>
        </member>
        <member name="T:Steema.TeeChart.Drawing.TextShapePosition">
            <summary>
            Shape Custom Position
            </summary>
        </member>
        <member name="P:Steema.TeeChart.Drawing.TextShapePosition.CustomPosition">
            <summary>
            Set to true to permit custom positioning of TextShape.
            </summary>
        </member>
        <member name="T:Steema.TeeChart.Drawing.View3DEvent">
            <summary>
            Notify class for Aspect related activity
            </summary>
        </member>
        <member name="T:Steema.TeeChart.TeeEvent">
            <summary>
            Internal use. Underlying Chart event class
            </summary>
        </member>
        <member name="T:Steema.TeeChart.Drawing.GraphicsFonts">
            <summary>
            Abstract class for storing all used fonts.
            </summary>
        </member>
        <member name="T:Steema.TeeChart.Drawing.GraphicsFont">
            <summary>
            Abstract class for individual font.
            </summary>
        </member>
        <member name="T:Steema.TeeChart.Drawing.GraphicsImages">
            <summary>
            Stores all used images.
            </summary>
        </member>
        <member name="T:Steema.TeeChart.Drawing.GraphicsImage">
            <summary>
            Individual image properties.
            </summary>
        </member>
        <member name="T:Steema.TeeChart.Functions.SARFunction">
            <summary>
            Parabolic Stop And Reversal financial indicator.
            </summary>
            <remarks><para>The Parabolic SAR, developed by Welles Wilder, is used to set 
            trailing price stops.  SAR refers to "Stop-And-Reversal".  It is designed to create exit points for both long and short 
            positions in such a way that it allows for reactions or fluctuations at the beginning of the position, but accelerates
            upward (for long positions) or downward (for short positions) as the movement tops out.</para>
            <para>Parabolic SAR is plotted around the price chart similar to a  moving average. The basics behind the formula for
            computing the SAR values can be found above. </para>
            <para>The Parabolic SAR provides excellent exit points. You should close long positions when the price falls below the 
            SAR and close short positions when the price rises above the SAR.</para>
            <para> If you are long (i.e., the price is above the SAR), the SAR will move up every day, regardless of the direction 
            the price is moving. The amount the SAR moves up depends on the amount that prices move. Wilder suggests using this 
            indicator in a trending (or directional) market. If the security is trending up, then one might only take long positions.
            If the security is trending down, one might only take short positions. </para>
            </remarks>
        </member>
        <member name="P:Steema.TeeChart.Functions.SARFunction.AccelerationFactor">
            <summary>
            Defines Wilder acceleration factor.
            </summary>
        </member>
        <member name="P:Steema.TeeChart.Functions.SARFunction.MaxStep">
            <summary>
            Defines maximum step in SAR calculation.
            </summary>
        </member>
        <member name="T:Steema.TeeChart.Styles.Calendar">
            <summary>
            Calendar series.
            </summary>
        </member>
        <member name="M:Steema.TeeChart.Styles.Calendar.Clicked(System.Int32,System.Int32)">
            <summary>
            Returns the ValueIndex of the "clicked" point in the Series.
            </summary>
        </member>
        <member name="M:Steema.TeeChart.Styles.Calendar.RectCell(System.Int32,System.Int32)">
            <summary>
             Returns the bounderies of a 2D-Rectangle defining the outline of the specified Calender series cell.
            </summary>
        </member>
        <member name="M:Steema.TeeChart.Styles.Calendar.MonthClick(System.Object,System.EventArgs)">
             <summary>
            Handles the click events of the NextMonth and PreviosMonth buttons. 
             </summary>
        </member>
        <member name="M:Steema.TeeChart.Styles.Calendar.SetCell(System.Int32,System.Int32)">
            <summary>
            Can use Mouseclick to set the selected DateCell.
            </summary>
            <param name="x">pixel X location</param>
            <param name="y">pixel Y location</param>
        </member>
        <member name="M:Steema.TeeChart.Styles.Calendar.SetNextPrevious(System.Int32,System.Int32)">
            <summary>
            Can use Mouseclick to set the Next or Previous buttons.
            </summary>
            <param name="x">pixel X location</param>
            <param name="y">pixel Y location</param>
        </member>
        <member name="M:Steema.TeeChart.Styles.Calendar.NextMonth">
            <summary>
            Moves the Calender series onto the month after the present one.
            </summary>
        </member>
        <member name="M:Steema.TeeChart.Styles.Calendar.PreviousMonth">
            <summary>
            Moves the Calender series onto the month before the present one.
            </summary>
        </member>
        <member name="P:Steema.TeeChart.Styles.Calendar.Pen">
            <summary>
            Element Pen Characteristics.
            </summary>
        </member>
        <member name="P:Steema.TeeChart.Styles.Calendar.Date">
            <summary>
            Defines a day and causes Calender Series to display the associated month.
            </summary>
        </member>
        <member name="P:Steema.TeeChart.Styles.Calendar.Days">
            <summary>
            Defines Calender Cell appearance characteristics for calender days.
            </summary>
        </member>
        <member name="P:Steema.TeeChart.Styles.Calendar.WeekDays">
            <summary>
            Defines Calender Cell appearance for weekday titles.
            </summary>
        </member>
        <member name="P:Steema.TeeChart.Styles.Calendar.Months">
            <summary>
            Defines Calender Cell appearance for the month name.
            </summary>
        </member>
        <member name="P:Steema.TeeChart.Styles.Calendar.Today">
            <summary>
            Defines Calender Cell appearance for the highlighted day.
            </summary>
        </member>
        <member name="P:Steema.TeeChart.Styles.Calendar.Sunday">
            <summary>
            Defines Calender Cell appearance for all Sundays.
            </summary>
        </member>
        <member name="P:Steema.TeeChart.Styles.Calendar.Trailing">
            <summary>
            Defines Calender Cell appearance for the trailing days.
            </summary>
        </member>
        <member name="P:Steema.TeeChart.Styles.Calendar.NextMonthButton">
            <summary>
            Gets the month after the present one.
            </summary>
        </member>
        <member name="P:Steema.TeeChart.Styles.Calendar.PreviousMonthButton">
            <summary>
            Gets the month before the present one.
            </summary>
        </member>
        <member name="P:Steema.TeeChart.Styles.Calendar.Rows">
            <summary>
            Returns the number of Rows present in the Calender Series.
            </summary>
        </member>
        <member name="P:Steema.TeeChart.Styles.Calendar.Description">
            <summary>
            Gets description text.
            </summary>
        </member>
        <member name="P:Steema.TeeChart.Styles.Calendar.Columns">
            <summary>
            Returns the number of Columns present in the Calender Series.
            </summary>
        </member>
        <member name="P:Steema.TeeChart.Styles.Calendar.PopupMenu">
            <summary>
            
            </summary>
        </member>
        <member name="P:Steema.TeeChart.Styles.Calendar.Month">
            <summary>
            
            </summary>
        </member>
        <member name="T:Steema.TeeChart.Styles.Calendar.CalendarChangeEventArgs">
             <summary>
            The Event Data for the <see cref="E:Steema.TeeChart.Styles.Calendar.Change"/> event.  
             </summary>
        </member>
        <member name="P:Steema.TeeChart.Styles.Calendar.CalendarChangeEventArgs.Date">
             <summary>
            The selected date. 
             </summary>
        </member>
        <member name="T:Steema.TeeChart.Styles.Calendar.CalendarChangeEventHandler">
             <summary>
            The Delegate for the <see cref="E:Steema.TeeChart.Styles.Calendar.Change"/> event.   
             </summary>
        </member>
        <member name="T:Steema.TeeChart.Styles.Calendar.CalendarCell">
             <summary>
            Contains the characteristics of each Calendar Cell.  
             </summary>
        </member>
        <member name="T:Steema.TeeChart.Styles.Calendar.CalendarCellUpper">
             <summary>
            Format information for the upper row cells of the Calendar Series.
             </summary>
        </member>
        <member name="P:Steema.TeeChart.Styles.Calendar.CalendarCellUpper.UpperCase">
            <summary>
            Enables/disables the display of months and weekdays in upper case.
            </summary>
        </member>
        <member name="P:Steema.TeeChart.Styles.Calendar.CalendarCellUpper.Format">
            <summary>
            Defines the DateValue format for the months and weekdays.
            </summary>
        </member>
        <member name="T:Steema.TeeChart.Functions.VarianceFunction">
            <summary>
            Variance function. 
            </summary>
        </member>
        <member name="M:Steema.TeeChart.Functions.VarianceFunction.Calculate(Steema.TeeChart.Styles.Series,System.Int32,System.Int32)">
            <summary>
            Performs function operation on s series. 
            </summary>
        </member>
        <member name="M:Steema.TeeChart.Functions.VarianceFunction.CalculateMany(System.Collections.ArrayList,System.Int32)">
            <summary>
            Performs function operation on all sourceSeries series. 
            </summary>
        </member>
        <member name="T:Steema.TeeChart.Functions.RootMeanSquare">
            <summary>
            Root Mean Square Function.
            </summary>
        </member>
        <member name="M:Steema.TeeChart.Functions.RootMeanSquare.Calculate(Steema.TeeChart.Styles.Series,System.Int32,System.Int32)">
            <summary>
            Performs function operation on SourceSeries series. 
            </summary>
        </member>
        <member name="M:Steema.TeeChart.Functions.RootMeanSquare.CalculateMany(System.Collections.ArrayList,System.Int32)">
            <summary>
            Performs function operation on list of series (SourceSeriesList). 
            </summary>
        </member>
        <member name="P:Steema.TeeChart.Functions.RootMeanSquare.Complete">
            <summary>
            Defines the RMS formula. 
            </summary>
        </member>
        <member name="T:Steema.TeeChart.Functions.PVOFunction">
            <summary>
            PVO Function.
            </summary>
        </member>
        <member name="M:Steema.TeeChart.Functions.PVOFunction.AddPoints(System.Array)">
            <summary>
            Gets all points from Source series, performs a function operation on points and stores results in ParentSeries.
            </summary>
        </member>
        <member name="P:Steema.TeeChart.Functions.PVOFunction.Percentage">
            <summary>
            Controls if the difference of two moving averages will be percentual or not.
            </summary>
        </member>
        <member name="P:Steema.TeeChart.Functions.PVOFunction.Period2">
            <summary>
            Defines the period of the second exponential moving average.
            </summary>
        </member>
        <member name="T:Steema.TeeChart.Functions.MedianFunction">
             <summary>
            Calculates the median value of the source series values.
            The median value is different than the average in that median returns the value that is "at the middle" of the source series values ordered in ascending order.
            If more than one value shares the middle position, this function returns the average of those values.
             </summary>
        </member>
        <member name="T:Steema.TeeChart.Functions.CustomSorted">
            <summary>
            Intermediate abstract class used by MedianFunction and ModeFunction to calculate values using the source series values sorted in ascending order.
            </summary>
        </member>
        <member name="P:Steema.TeeChart.Functions.CustomSorted.IncludeNulls">
            <summary>
            When True, null values in the source series will be included in the calculation.
            Default is True.
            </summary>
        </member>
        <member name="T:Steema.TeeChart.Functions.CompressionPeriod">
             <summary>
            Describes the possible values of the <see cref="P:Steema.TeeChart.Functions.CompressOHLC.Compress"/> property. 
             </summary>
        </member>
        <member name="F:Steema.TeeChart.Functions.CompressionPeriod.ocDay">
             <summary>
            Day. 
             </summary>
        </member>
        <member name="F:Steema.TeeChart.Functions.CompressionPeriod.ocWeek">
             <summary>
            Week. 
             </summary>
        </member>
        <member name="F:Steema.TeeChart.Functions.CompressionPeriod.ocMonth">
             <summary>
            Month. 
             </summary>
        </member>
        <member name="F:Steema.TeeChart.Functions.CompressionPeriod.ocBiMonth">
             <summary>
            BiMonthly. 
             </summary>
        </member>
        <member name="F:Steema.TeeChart.Functions.CompressionPeriod.ocQuarter">
             <summary>
            Quarter. 
             </summary>
        </member>
        <member name="F:Steema.TeeChart.Functions.CompressionPeriod.ocYear">
             <summary>
            Year. 
             </summary>
        </member>
        <member name="T:Steema.TeeChart.Functions.CompressOHLC">
            <summary>
            CompressOHLC Function.
            </summary>
        </member>
        <member name="M:Steema.TeeChart.Functions.CompressOHLC.AddPoints(System.Array)">
            <summary>
            Gets all points from Source series, performs a function operation on points and stores results in ParentSeries.
            </summary>
        </member>
        <member name="P:Steema.TeeChart.Functions.CompressOHLC.Compress">
            <summary>
            Gets or sets the Compression Period as defined by the <see cref="T:Steema.TeeChart.Functions.CompressionPeriod"/> enumeration.
            </summary>
        </member>
        <member name="T:Steema.TeeChart.Functions.CompressGetDateEventArgs">
            <summary>
            EventArgs for <see cref="T:Steema.TeeChart.Functions.CompressGetDateHandler"/>
            </summary>
        </member>
        <member name="P:Steema.TeeChart.Functions.CompressGetDateEventArgs.Source">
            <summary>
            The CompressOHLC Function Source series.
            </summary>
        </member>
        <member name="P:Steema.TeeChart.Functions.CompressGetDateEventArgs.ValueIndex">
            <summary>
            The CompressOHLC Function ValueIndex.
            </summary>
        </member>
        <member name="P:Steema.TeeChart.Functions.CompressGetDateEventArgs.Date">
            <summary>
            The CompressOHLC Function ValueIndex Date.
            </summary>
        </member>
        <member name="T:Steema.TeeChart.Functions.Bollinger">
            <summary>
            Summary description for Bollinger.
            </summary>
        </member>
        <member name="P:Steema.TeeChart.Functions.Bollinger.LowBand">
            <summary>
            LowBand Series stores the low band (Mean - Deviation*StdDev) values. High band values (Mean + Deviation*StdDev) values are stored in the ParentSeries.
            </summary>
        </member>
        <member name="P:Steema.TeeChart.Functions.Bollinger.LowBandPen">
            <summary>
            The pen use to display the lower band line.
            Corresponds to LowBand.Pen property.
            </summary>
        </member>
        <member name="P:Steema.TeeChart.Functions.Bollinger.UpperBandPen">
            <summary>
            The pen used to display the upper band line.
            </summary>
        </member>
        <member name="P:Steema.TeeChart.Functions.Bollinger.Exponential">
            <summary>
            When Exponential is true, then exponential moving average function will be used to calculate mean value. 
            Otherwise standard moving average function will be used to calculate mean value.
            </summary>
        </member>
        <member name="P:Steema.TeeChart.Functions.Bollinger.Deviation">
            <summary>
            Deviation defines the standard deviation (StdDev) multiplier, used to calculate low and high Bollinger band value.
            </summary>
        </member>
        <member name="T:Steema.TeeChart.Editors.Export.TIFFOptions">
            <summary>
            TIFF Export Format.
            </summary>
        </member>
        <member name="F:Steema.TeeChart.Editors.Export.TIFFOptions.components">
            <summary>
            Required designer variable.
            </summary>
        </member>
        <member name="M:Steema.TeeChart.Editors.Export.TIFFOptions.Dispose(System.Boolean)">
            <summary>
            Clean up any resources being used.
            </summary>
        </member>
        <member name="M:Steema.TeeChart.Editors.Export.TIFFOptions.InitializeComponent">
            <summary>
            Required method for Designer support - do not modify
            the contents of this method with the code editor.
            </summary>
        </member>
        <member name="T:Steema.TeeChart.Editors.Tools.ToolsGallery">
            <summary>
            Tools Gallery editor.
            </summary>
        </member>
        <member name="F:Steema.TeeChart.Editors.Tools.ToolsGallery.components">
            <summary>
            Required designer variable.
            </summary>
        </member>
        <member name="M:Steema.TeeChart.Editors.Tools.ToolsGallery.Dispose(System.Boolean)">
            <summary>
            Clean up any resources being used.
            </summary>
        </member>
        <member name="M:Steema.TeeChart.Editors.Tools.ToolsGallery.InitializeComponent">
            <summary>
            Required method for Designer support - do not modify
            the contents of this method with the code editor.
            </summary>
        </member>
        <member name="T:Steema.TeeChart.Editors.Tools.ToolsEditor">
            <summary>
            Summary description for ToolsEditor.
            </summary>
        </member>
        <member name="F:Steema.TeeChart.Editors.Tools.ToolsEditor.components">
            <summary>
            Required designer variable.
            </summary>
        </member>
        <member name="M:Steema.TeeChart.Editors.Tools.ToolsEditor.Dispose(System.Boolean)">
            <summary>
            Clean up any resources being used.
            </summary>
        </member>
        <member name="M:Steema.TeeChart.Editors.Tools.ToolsEditor.InitializeComponent">
            <summary>
            Required method for Designer support - do not modify
            the contents of this method with the code editor.
            </summary>
        </member>
        <member name="T:Steema.TeeChart.Editors.Tools.LightToolEditor">
            <summary>
            Summary description for LightToolEditor.
            </summary>
        </member>
        <member name="F:Steema.TeeChart.Editors.Tools.LightToolEditor.components">
            <summary>
            Required designer variable.
            </summary>
        </member>
        <member name="M:Steema.TeeChart.Editors.Tools.LightToolEditor.Dispose(System.Boolean)">
            <summary>
            Clean up any resources being used.
            </summary>
        </member>
        <member name="M:Steema.TeeChart.Editors.Tools.LightToolEditor.InitializeComponent">
            <summary>
            Required method for Designer support - do not modify
            the contents of this method with the code editor.
            </summary>
        </member>
        <member name="T:Steema.TeeChart.Editors.Tools.GridTransposeEditor">
            <summary>
            Summary description for GridTransposeEditor.
            </summary>
        </member>
        <member name="F:Steema.TeeChart.Editors.Tools.GridTransposeEditor.components">
            <summary>
            Required designer variable.
            </summary>
        </member>
        <member name="M:Steema.TeeChart.Editors.Tools.GridTransposeEditor.Dispose(System.Boolean)">
            <summary>
            Clean up any resources being used.
            </summary>
        </member>
        <member name="M:Steema.TeeChart.Editors.Tools.GridTransposeEditor.InitializeComponent">
            <summary>
            Required method for Designer support - do not modify
            the contents of this method with the code editor.
            </summary>
        </member>
        <member name="M:Steema.TeeChart.Editors.Tools.CursorEditor.Dispose(System.Boolean)">
            <summary>
            Clean up any resources being used.
            </summary>
        </member>
        <member name="M:Steema.TeeChart.Editors.Tools.CursorEditor.InitializeComponent">
            <summary>
            Required method for Designer support - do not modify
            the contents of this method with the code editor.
            </summary>
        </member>
        <member name="M:Steema.TeeChart.Editors.Tools.AxisScrollEditor.Dispose(System.Boolean)">
            <summary>
            Clean up any resources being used.
            </summary>
        </member>
        <member name="M:Steema.TeeChart.Editors.Tools.AxisScrollEditor.InitializeComponent">
            <summary>
            Required method for Designer support - do not modify
            the contents of this method with the code editor.
            </summary>
        </member>
        <member name="T:Steema.TeeChart.Editors.Series.SurfaceSeries">
            <summary>
            Summary description for SurfEdit.
            </summary>
        </member>
        <member name="F:Steema.TeeChart.Editors.Series.SurfaceSeries.components">
            <summary>
            Required designer variable.
            </summary>
        </member>
        <member name="M:Steema.TeeChart.Editors.Series.SurfaceSeries.Dispose(System.Boolean)">
            <summary>
            Clean up any resources being used.
            </summary>
        </member>
        <member name="M:Steema.TeeChart.Editors.Series.SurfaceSeries.InitializeComponent">
            <summary>
            Required method for Designer support - do not modify
            the contents of this method with the code editor.
            </summary>
        </member>
        <member name="T:Steema.TeeChart.Editors.Series.RenkoEditor">
            <summary>
            BoxPlot Series Editor.
            </summary>
        </member>
        <member name="F:Steema.TeeChart.Editors.Series.RenkoEditor.components">
            <summary>
            Required designer variable.
            </summary>
        </member>
        <member name="M:Steema.TeeChart.Editors.Series.RenkoEditor.Dispose(System.Boolean)">
            <summary>
            Clean up any resources being used.
            </summary>
        </member>
        <member name="M:Steema.TeeChart.Editors.Series.RenkoEditor.InitializeComponent">
            <summary>
            Required method for Designer support - do not modify
            the contents of this method with the code editor.
            </summary>
        </member>
        <member name="T:Steema.TeeChart.Editors.Series.Grid3DSeries">
            <summary>
            Grid3DSeries Editor.
            </summary>
        </member>
        <member name="F:Steema.TeeChart.Editors.Series.Grid3DSeries.components">
            <summary>
            Required designer variable.
            </summary>
        </member>
        <member name="M:Steema.TeeChart.Editors.Series.Grid3DSeries.Dispose(System.Boolean)">
            <summary>
            Clean up any resources being used.
            </summary>
        </member>
        <member name="M:Steema.TeeChart.Editors.Series.Grid3DSeries.InitializeComponent">
            <summary>
            Required method for Designer support - do not modify
            the contents of this method with the code editor.
            </summary>
        </member>
        <member name="T:Steema.TeeChart.Editors.PrintPreview">
            <summary>
            Summary description for PrintPreview.
            </summary>
        </member>
        <member name="F:Steema.TeeChart.Editors.PrintPreview.components">
            <summary>
            Required designer variable.
            </summary>
        </member>
        <member name="M:Steema.TeeChart.Editors.PrintPreview.Dispose(System.Boolean)">
            <summary>
            Clean up any resources being used.
            </summary>
        </member>
        <member name="M:Steema.TeeChart.Editors.PrintPreview.InitializeComponent">
            <summary>
            Required method for Designer support - do not modify
            the contents of this method with the code editor.
            </summary>
        </member>
        <member name="T:Steema.TeeChart.Editors.Animations.AnimationsEditor">
            <summary>
            Summary description for ToolsEditor.
            </summary>
        </member>
        <member name="F:Steema.TeeChart.Editors.Animations.AnimationsEditor.components">
            <summary>
            Required designer variable.
            </summary>
        </member>
        <member name="M:Steema.TeeChart.Editors.Animations.AnimationsEditor.Dispose(System.Boolean)">
            <summary>
            Clean up any resources being used.
            </summary>
        </member>
        <member name="M:Steema.TeeChart.Editors.Animations.AnimationsEditor.InitializeComponent">
            <summary>
            Required method for Designer support - do not modify
            the contents of this method with the code editor.
            </summary>
        </member>
        <member name="T:Steema.TeeChart.Tools.RectangleTool">
            <summary>
            Rectangle tool.
            </summary>
        </member>
        <member name="T:Steema.TeeChart.Tools.Annotation">
            <summary>
            Annotation tool.
            </summary>
        </member>
        <member name="M:Steema.TeeChart.Tools.Annotation.StartEdit">
            <summary>
            Puts the Annotation into edit mode.
            </summary>
        </member>
        <member name="M:Steema.TeeChart.Tools.Annotation.EndEdit">
            <summary>
            Stops the Annotation from further editing.
            </summary>
        </member>
        <member name="M:Steema.TeeChart.Tools.Annotation.EditorKey(System.Object,System.Windows.Forms.KeyEventArgs)">
            <summary>
            The method passed to the KeyDown event by default.
            </summary>
        </member>
        <member name="P:Steema.TeeChart.Tools.Annotation.Left">
            <summary>
            Sets horizontal displacement in pixels of text box from Chart's left edge.
            </summary>
        </member>
        <member name="P:Steema.TeeChart.Tools.Annotation.Width">
            <summary>
            Sets a custom width.
            </summary>
        </member>
        <member name="P:Steema.TeeChart.Tools.Annotation.AllowEdit">
            <summary>
            Allows the Text of the Tool to be edited.
            </summary>
        </member>
        <member name="P:Steema.TeeChart.Tools.Annotation.Height">
            <summary>
            Sets a custom width.
            </summary>
        </member>
        <member name="P:Steema.TeeChart.Tools.Annotation.Bounds">
            <summary>
            The rectangular bounds of the annotation tool.
            </summary>
        </member>
        <member name="P:Steema.TeeChart.Tools.Annotation.AutoSize">
            <summary>
            Set to true to permit custom sizing of TextShape.
            </summary>
        </member>
        <member name="P:Steema.TeeChart.Tools.Annotation.Top">
            <summary>
            Sets vertical displacement in pixels of text box from Chart's top edge.
            </summary>
        </member>
        <member name="P:Steema.TeeChart.Tools.Annotation.Position">
            <summary>
            Defines a default position for the Annotation Tool text box and text.
            </summary>
        </member>
        <member name="P:Steema.TeeChart.Tools.Annotation.PositionUnits">
            <summary>
            Defines Annotation Position units (pixels or percentage).
            </summary>
        </member>
        <member name="P:Steema.TeeChart.Tools.Annotation.Shape">
            <summary>
            Sets characteristics of the Annotation Tool text and text box Shape.
            </summary>
        </member>
        <member name="P:Steema.TeeChart.Tools.Annotation.Text">
            <summary>
            Defines the text for the Annotation Tool.
            </summary>
        </member>
        <member name="P:Steema.TeeChart.Tools.Annotation.Description">
            <summary>
            Gets descriptive text.
            </summary>
        </member>
        <member name="P:Steema.TeeChart.Tools.Annotation.Summary">
            <summary>
            Gets detailed descriptive text.
            </summary>
        </member>
        <member name="P:Steema.TeeChart.Tools.RectangleTool.Description">
            <summary>
            Gets descriptive text.
            </summary>
        </member>
        <member name="T:Steema.TeeChart.Tools.ColorBand">
            <summary>
            Color band tool, use it to display a coloured rectangle (band)
            at the specified axis and position.
            </summary>
        </member>
        <member name="P:Steema.TeeChart.Tools.ColorBand.Description">
            <summary>
            Gets descriptive text.
            </summary>
        </member>
        <member name="P:Steema.TeeChart.Tools.ColorBand.Summary">
            <summary>
            Gets detailed descriptive text.
            </summary>
        </member>
        <member name="P:Steema.TeeChart.Tools.ColorBand.DrawBehind">
            <summary>
            Draws the Colorband behind the series values when true.
            </summary>
        </member>
        <member name="P:Steema.TeeChart.Tools.ColorBand.Start">
            <summary>
            Sets Start Axis value of colorband.
            </summary>
        </member>
        <member name="P:Steema.TeeChart.Tools.ColorBand.End">
            <summary>
            Sets End Axis value of colorband.
            </summary>
        </member>
        <member name="P:Steema.TeeChart.Tools.ColorBand.Transparency">
            <summary>
            Sets the Transparency of ColorBand as percentage.
            </summary>
        </member>
        <member name="P:Steema.TeeChart.Tools.ColorBand.Gradient">
            <summary>
            Sets Band colour gradient.
            </summary>
        </member>
        <member name="P:Steema.TeeChart.Tools.ColorBand.Color">
            <summary>
            Sets Band Color.
            </summary>
        </member>
        <member name="P:Steema.TeeChart.Tools.ColorBand.Brush">
            <summary>
            Element Brush characteristics.
            </summary>
        </member>
        <member name="P:Steema.TeeChart.Tools.ColorBand.StartLine">
            <summary>
            Contains formatting properties for the automatic line used to drag the start value of the ColorBand tool at runtime.
            </summary>
        </member>
        <member name="P:Steema.TeeChart.Tools.ColorBand.EndLine">
            <summary>
            Contains formatting properties for the automatic line used to drag the end value of the ColorBand tool at runtime.
            </summary>
        </member>
        <member name="P:Steema.TeeChart.Tools.ColorBand.ResizeEnd">
            <summary>
            Gets or sets if the ColorBand tool allows mouse dragging of the edge corresponding to the end value.
            </summary>
        </member>
        <member name="P:Steema.TeeChart.Tools.ColorBand.ResizeStart">
            <summary>
            Gets or sets if the ColorBand tool allows mouse dragging of the edge corresponding to the start value.
            </summary>
        </member>
        <member name="P:Steema.TeeChart.Tools.ColorBand.StartLinePen">
            <summary>
            Pen used to draw the starting line of the color band tool.
            </summary>
        </member>
        <member name="P:Steema.TeeChart.Tools.ColorBand.EndLinePen">
            <summary>
            Pen used to draw the ending line of the color band tool.
            </summary>
        </member>
        <member name="T:Steema.TeeChart.Themes.TeeChartTheme">
            <summary>
            Summary description for DefaultTheme.
            </summary>
        </member>
        <member name="T:Steema.TeeChart.Themes.BlueSkyTheme">
            <summary>
            BlueSkyTheme.
            </summary>
        </member>
        <member name="T:Steema.TeeChart.Styles.TriSurface">
            <summary>
            TriSurface Series.
            </summary>
        </member>
        <member name="T:Steema.TeeChart.Styles.Custom3DPalette">
            <summary>
            Custom3DPalette Series Style.
            </summary>
        </member>
        <member name="T:Steema.TeeChart.Styles.Custom3D">
            <summary>
            Custom3D Series.
            </summary>
        </member>
        <member name="M:Steema.TeeChart.Styles.Custom3D.Add(System.Array,System.Array,System.Array,System.Array)">
            <summary>
            Adds the X, Y and Z arrays.
            </summary>
        </member>
        <member name="M:Steema.TeeChart.Styles.Custom3D.Add(System.Array,System.Array,System.Array)">
            <summary>
            Adds the X, Y and Z arrays.
            </summary>
        </member>
        <member name="M:Steema.TeeChart.Styles.Custom3D.Add(System.Nullable{System.Double},System.Nullable{System.Double},System.Nullable{System.Double})">
            <summary>
            Adds a new point to a 3D Series.
            </summary>
        </member>
        <member name="M:Steema.TeeChart.Styles.Custom3D.Add(System.Nullable{System.Double},System.Nullable{System.Double},System.Nullable{System.Double},System.String)">
            <summary>
            Adds a new point to a 3D Series and label.
            </summary>
        </member>
        <member name="M:Steema.TeeChart.Styles.Custom3D.Add(System.Nullable{System.Double},System.Nullable{System.Double},System.Nullable{System.Double},System.Drawing.Color)">
            <summary>
            Adds a new point to a 3D Series and color.
            </summary>
        </member>
        <member name="M:Steema.TeeChart.Styles.Custom3D.Add(System.DateTime,System.Nullable{System.Double},System.Nullable{System.Double},System.String,System.Drawing.Color)">
            <summary>
            Adds a new Datetime point to a 3D Series, label and color.
            </summary>
            <param name="aDate">Datetime value</param>
            <param name="y">Y value</param>
            <param name="z">Z value</param>
            <param name="text">Point text</param>
            <param name="color">Point Color</param>
            <returns>index of added point</returns>
        </member>
        <member name="M:Steema.TeeChart.Styles.Custom3D.Add(System.Nullable{System.Double},System.Nullable{System.Double},System.Nullable{System.Double},System.String,System.Drawing.Color)">
            <summary>
            Adds a new point to a 3D Series, label and color.
            </summary>
        </member>
        <member name="M:Steema.TeeChart.Styles.Custom3D.Add(System.Double,System.Double,System.Double)">
            <summary>
            Adds a new point to a 3D Series.
            </summary>
        </member>
        <member name="M:Steema.TeeChart.Styles.Custom3D.Add(System.Double,System.Double,System.Double,System.Drawing.Color)">
            <summary>
            Adds a new point to a 3D Series and color.
            </summary>
        </member>
        <member name="M:Steema.TeeChart.Styles.Custom3D.Add(System.Double,System.Double,System.Double,System.String)">
            <summary>
            Adds a new point to a 3D Series and label.
            </summary>
        </member>
        <member name="M:Steema.TeeChart.Styles.Custom3D.Add(System.Double,System.Double,System.Double,System.String,System.Drawing.Color)">
            <summary>
            Adds a new point to a 3D Series, label and color.
            </summary>
        </member>
        <member name="M:Steema.TeeChart.Styles.Custom3D.Add(System.DateTime,System.Double,System.Double,System.String,System.Drawing.Color)">
            <summary>
            Adds a new Datetime point to a 3D Series, label and color.
            </summary>
            <param name="aDate">Datetime value</param>
            <param name="y">Y value</param>
            <param name="z">Z value</param>
            <param name="text">Point text</param>
            <param name="color">Point Color</param>
            <returns>index of added point</returns>
        </member>
        <member name="M:Steema.TeeChart.Styles.Custom3D.Add(System.Data.DataView)">
             <summary>
            Adds the DataView to the 3D Series.
             </summary>
        </member>
        <member name="M:Steema.TeeChart.Styles.Custom3D.IsValidSourceOf(Steema.TeeChart.Styles.Series)">
             <summary>
            Checks if given series object instance is a Custom3D instance. 
             </summary>
        </member>
        <member name="M:Steema.TeeChart.Styles.Custom3D.MaxZValue">
            <summary>
            Returns Maximum Z Value.
            </summary>
        </member>
        <member name="M:Steema.TeeChart.Styles.Custom3D.MinZValue">
            <summary>
            Returns Minimum Z Value.
            </summary>
        </member>
        <member name="P:Steema.TeeChart.Styles.Custom3D.ZValues">
            <summary>
            Values defining Z grid point positions.
            </summary>
        </member>
        <member name="P:Steema.TeeChart.Styles.Custom3D.TimesZOrder">
             <summary>
            For internal use. 
             </summary>
        </member>
        <member name="P:Steema.TeeChart.Styles.Custom3D.Item(System.Int32)">
            <summary>
            XYZ Point characteristics
            </summary>
        </member>
        <member name="M:Steema.TeeChart.Styles.Custom3DPalette.ClearPalette">
            <summary>
            Deletes all Palette information.
            </summary>
        </member>
        <member name="M:Steema.TeeChart.Styles.Custom3DPalette.AddPalette(System.Double,System.Drawing.Color)">
            <summary>
            Add Color to Palette list
            </summary>
            <param name="aValue">Data Value</param>
            <param name="aColor">Color</param>
            <returns>New Palette Color Index</returns>
        </member>
        <member name="M:Steema.TeeChart.Styles.Custom3DPalette.ValueColor(System.Int32)">
             <summary>
            Returns the colour of the index point. 
             </summary>
        </member>
        <member name="M:Steema.TeeChart.Styles.Custom3DPalette.LegendString(System.Int32,Steema.TeeChart.LegendTextStyles)">
            <summary>
            Returns LegendString for LegendIndexth item.
            </summary>
        </member>
        <member name="E:Steema.TeeChart.Styles.Custom3DPalette.GetValueColor">
             <summary>
            Occurs each time a Surface's polygon is displayed. Using this event, specific Colors can be assigned to individual Surface polygons. 
             </summary>
        </member>
        <member name="P:Steema.TeeChart.Styles.Custom3DPalette.Pen">
            <summary>
            Defines the Pen to draw the Surface polygons.
            </summary>
        </member>
        <member name="P:Steema.TeeChart.Styles.Custom3DPalette.PaletteRange">
             <summary>
            Defines the range of colour in the default color Palette.
             </summary>
        </member>
        <member name="P:Steema.TeeChart.Styles.Custom3DPalette.PaletteSteps">
            <summary>
            Sets the number of entries in the default color Palette.
            </summary>
        </member>
        <member name="P:Steema.TeeChart.Styles.Custom3DPalette.RedFactor">
             <summary>
            Defines the alpha value for the Red of the ARGB component. 
             </summary>
        </member>
        <member name="P:Steema.TeeChart.Styles.Custom3DPalette.GreenFactor">
             <summary>
            Defines the alpha value for the Green of the ARGB component. 
             </summary>
        </member>
        <member name="P:Steema.TeeChart.Styles.Custom3DPalette.BlueFactor">
             <summary>
            Defines the alpha value for the Blue of the ARGB component.
             </summary>
        </member>
        <member name="P:Steema.TeeChart.Styles.Custom3DPalette.EndColor">
            <summary>
            Determines the last Range palette color.
            </summary>
        </member>
        <member name="P:Steema.TeeChart.Styles.Custom3DPalette.MidColor">
            <summary>
            Determines the middle Range palette color.
            </summary>
        </member>
        <member name="P:Steema.TeeChart.Styles.Custom3DPalette.StartColor">
            <summary>
            Sets 1 of 3 Colors used to create the palette to fill the Surface polygons.
            </summary>
        </member>
        <member name="P:Steema.TeeChart.Styles.Custom3DPalette.Brush">
            <summary>
            Defines the Brush to fill the Surface polygons.
            </summary>
        </member>
        <member name="P:Steema.TeeChart.Styles.Custom3DPalette.PaletteStyle">
            <summary>
            Selects Pale or Strong colour palette.
            </summary>
        </member>
        <member name="P:Steema.TeeChart.Styles.Custom3DPalette.PaletteStep">
             <summary>
            The interval amount between palette Colors. 
             </summary>
        </member>
        <member name="P:Steema.TeeChart.Styles.Custom3DPalette.Palette">
            <summary>
            Access the Color Palette list
            </summary>
        </member>
        <member name="P:Steema.TeeChart.Styles.Custom3DPalette.PaletteMin">
             <summary>
            The starting value used to calculate the color palette when <see cref="P:Steema.TeeChart.Styles.Custom3DPalette.UsePaletteMin"/> is true.
             </summary>
        </member>
        <member name="P:Steema.TeeChart.Styles.Custom3DPalette.UseColorRange">
            <summary>
            Sets gradient color palette to fill Surface polygons.
            </summary>
        </member>
        <member name="P:Steema.TeeChart.Styles.Custom3DPalette.UsePalette">
            <summary>
            Sets multi-color palette to fill Surface polygons.
            </summary>
        </member>
        <member name="P:Steema.TeeChart.Styles.Custom3DPalette.UsePaletteMin">
             <summary>
            Set to True to force the color palette to start at <see cref="P:Steema.TeeChart.Styles.Custom3DPalette.UsePaletteMin"/> property value. 
             </summary>
        </member>
        <member name="T:Steema.TeeChart.Styles.Custom3DPalette.GetColorEventArgs">
             <summary>
            The Event Data for the <see cref="E:Steema.TeeChart.Styles.Custom3DPalette.GetValueColor"/> event.  
             </summary>
        </member>
        <member name="P:Steema.TeeChart.Styles.Custom3DPalette.GetColorEventArgs.ValueIndex">
             <summary>
            The Index of the value in the series <see cref="T:Steema.TeeChart.Styles.ValueList"/>.  
             </summary>
        </member>
        <member name="P:Steema.TeeChart.Styles.Custom3DPalette.GetColorEventArgs.Color">
             <summary>
            The color of the series point. 
             </summary>
        </member>
        <member name="T:Steema.TeeChart.Styles.Custom3DPalette.GetColorEventHandler">
             <summary>
            The Delegate for the <see cref="E:Steema.TeeChart.Styles.Custom3DPalette.GetValueColor"/> event.  
             </summary>
        </member>
        <member name="M:Steema.TeeChart.Styles.TriSurface.Clear">
            <summary>
            Deletes all TriSurfaceSeries values.
            </summary>
        </member>
        <member name="P:Steema.TeeChart.Styles.TriSurface.Outline">
            <summary>
            Accesses the TChartHiddenPen object representing the color and style of TriSurface border.
            </summary>
        </member>
        <member name="P:Steema.TeeChart.Styles.TriSurface.HideTriangles">
            <summary>
            Hides constructed tiangles 
            </summary>
        </member>
        <member name="T:Steema.TeeChart.Styles.Ternary">
            <summary>
            Ternary Series.
            </summary>
        </member>
        <member name="E:Steema.TeeChart.Styles.Ternary.ClickPointer">
             <summary>
            Occurs when a series pointer is clicked. 
             </summary>
        </member>
        <member name="E:Steema.TeeChart.Styles.Ternary.GetPointerStyle">
             <summary>
            Occurs on the drawing of the series pointers. 
             </summary>
        </member>
        <member name="T:Steema.TeeChart.Styles.Ternary.ClickPointerEventHandler">
             <summary>
            The Delegate for the <see cref="E:Steema.TeeChart.Styles.CustomPoint.ClickPointer"/> event.  
             </summary>
        </member>
        <member name="T:Steema.TeeChart.Styles.Ternary.GetPointerStyleEventHandler">
             <summary>
            The Delegate for the <see cref="E:Steema.TeeChart.Styles.CustomPoint.GetPointerStyle"/> event.  
             </summary>
        </member>
        <member name="T:Steema.TeeChart.Styles.TagCloud">
            <summary>
            
            </summary>
        </member>
        <member name="M:Steema.TeeChart.Styles.TagCloud.AddTag(System.String,System.Double)">
            <summary>
            Adds a tag with given text and value (frequency).
            </summary>
        </member>
        <member name="M:Steema.TeeChart.Styles.TagCloud.GetTagFontSize(System.Int32)">
            <summary>
            Returns the font size of the tag of the specified valueindex. 
            </summary>
        </member>
        <member name="E:Steema.TeeChart.Styles.TagCloud.DrawTag">
            <summary>
            The DrawTag event.
            </summary>
        </member>
        <member name="P:Steema.TeeChart.Styles.TagCloud.Description">
            <summary>
            Gets descriptive text.
            </summary>
        </member>
        <member name="P:Steema.TeeChart.Styles.TagCloud.Filter">
            <summary>
            Gets and sets the string which filters the tags drawn.
            </summary>
        </member>
        <member name="P:Steema.TeeChart.Styles.TagCloud.Font">
            <summary>
            Gets and sets the font characteristics of the tags.
            </summary>
        </member>
        <member name="P:Steema.TeeChart.Styles.TagCloud.Gradient">
            <summary>
            Gets and sets the gradient.
            </summary>
        </member>
        <member name="P:Steema.TeeChart.Styles.TagCloud.TagSeparation">
            <summary>
            Gets and sets the percentage separation between tags.
            </summary>
        </member>
        <member name="T:Steema.TeeChart.Styles.Smith">
            <summary>
            Smith Series.
            </summary>
        </member>
        <member name="M:Steema.TeeChart.Styles.Smith.DrawValue(System.Int32)">
            <summary>
            Called internally. Draws the "ValueIndex" point of the Series.
            </summary>
        </member>
        <member name="M:Steema.TeeChart.Styles.Smith.CalcXPos(System.Int32)">
            <summary>
            Returns the pixel Screen Horizontal coordinate of the ValueIndex Series value.
            </summary>
        </member>
        <member name="M:Steema.TeeChart.Styles.Smith.CalcYPos(System.Int32)">
            <summary>
            Returns the pixel Screen Vertical coordinate of the ValueIndex Series value.
            </summary>
        </member>
        <member name="M:Steema.TeeChart.Styles.Smith.Clicked(System.Int32,System.Int32)">
            <summary>
            Returns the ValueIndex of the "clicked" point in the Series.
            </summary>
        </member>
        <member name="P:Steema.TeeChart.Styles.Smith.Pen">
            <summary>
            Defines pen to draw SmithSeries Chart.
            </summary>
        </member>
        <member name="P:Steema.TeeChart.Styles.Smith.Pointer">
            <summary>
            Defines pen to draw SmithSeries Chart.
            </summary>
        </member>
        <member name="P:Steema.TeeChart.Styles.Smith.Brush">
            <summary>
            Defines Brush to fill Chart.
            </summary>
        </member>
        <member name="P:Steema.TeeChart.Styles.Smith.CCirclePen">
            <summary>
            Defines Pen to draw CCircles of the Smith Series.
            </summary>
        </member>
        <member name="P:Steema.TeeChart.Styles.Smith.RCirclePen">
            <summary>
            Defines Pen to draw RCircles of the Smith Series.
            </summary>
        </member>
        <member name="P:Steema.TeeChart.Styles.Smith.CirclePen">
            <summary>
            Defines Pen to draw external Circle of the Smith Series.
            </summary>
        </member>
        <member name="P:Steema.TeeChart.Styles.Smith.CLabels">
            <summary>
            Shows/hides the constant reactance labels.
            </summary>
        </member>
        <member name="P:Steema.TeeChart.Styles.Smith.RLabels">
            <summary>
            Shows/hides the constant resistance labels.
            </summary>
        </member>
        <member name="P:Steema.TeeChart.Styles.Smith.CLabelsFont">
            <summary>
            xCircle labels font.
            </summary>
        </member>
        <member name="P:Steema.TeeChart.Styles.Smith.RLabelsFont">
            <summary>
            rCircle labels font.
            </summary>
        </member>
        <member name="P:Steema.TeeChart.Styles.Smith.Description">
            <summary>
            Gets descriptive text.
            </summary>
        </member>
        <member name="T:Steema.TeeChart.Styles.Points3D">
            <summary>
            Point3D Series.
            Each point has XYZ coordinates.
            </summary>
        </member>
        <member name="M:Steema.TeeChart.Styles.Points3D.DrawValue(System.Int32)">
            <summary>
            Called internally. Draws the "ValueIndex" point of the Series.
            </summary>
        </member>
        <member name="M:Steema.TeeChart.Styles.Points3D.MaxZValue">
            <summary>
            Returns MaxZValue.
            </summary>
        </member>
        <member name="M:Steema.TeeChart.Styles.Points3D.Clicked(System.Int32,System.Int32)">
            <summary>
            Returns the ValueIndex of the "clicked" point in the Series.
            </summary>
        </member>
        <member name="P:Steema.TeeChart.Styles.Points3D.Pointer">
            <summary>
            Each point in a PointSeries is drawn using the Pointer properties. 
            </summary>
        </member>
        <member name="P:Steema.TeeChart.Styles.Points3D.LinePen">
            <summary>
            Sets the Pen for the Point3D connecting Lines.
            </summary>
        </member>
        <member name="P:Steema.TeeChart.Styles.Points3D.BaseLine">
            <summary>
            Sets the Pen for the Point3D connecting Lines.
            </summary>
        </member>
        <member name="P:Steema.TeeChart.Styles.Points3D.DepthSize">
            <summary>
            Sets the Depth of each 3DPoint to the value of DepthSize.
            </summary>
        </member>
        <member name="T:Steema.TeeChart.Styles.Points3D.GetPointerStyleEventHandler">
             <summary>
            The Delegate for the <see cref="E:Steema.TeeChart.Styles.CustomPoint.GetPointerStyle"/> event.  
             </summary>
        </member>
        <member name="T:Steema.TeeChart.Functions.MACDFunction">
            <summary>
            The MACD function (Moving Average Convergence Divergence), used in financial charts.
            </summary>
        </member>
        <member name="P:Steema.TeeChart.Functions.MACDFunction.HistogramPen">
            <summary>
            The Pen used to draw the histogram line of a MACD function.
            </summary>
        </member>
        <member name="P:Steema.TeeChart.Functions.MACDFunction.MACDPen">
            <summary>
            The pen properties used to draw the MACD line.
            </summary>
        </member>
        <member name="P:Steema.TeeChart.Functions.MACDFunction.MACDExpPen">
            <summary>
            The pen properties used to draw the Exponential MACD line.
            </summary>
        </member>
        <member name="P:Steema.TeeChart.Functions.MACDFunction.Period2">
            <summary>
            The Period property controls how many points or X range(sse note below) will trigger a new point calculation.
            </summary>
        </member>
        <member name="P:Steema.TeeChart.Functions.MACDFunction.Period3">
            <summary>
            Determines the number of samples used to calculate a MACD function.
            </summary>
        </member>
        <member name="P:Steema.TeeChart.Functions.MACDFunction.Histogram">
            <summary>
            Returns a sub-series (of type Volume) internally calculated by MACD function.
            </summary>
        </member>
        <member name="P:Steema.TeeChart.Functions.MACDFunction.MACDExp">
            <summary>
            Returns a second sub-series (of type FastLine) internally calculated by MACD function.
            </summary>
        </member>
        <member name="T:Steema.TeeChart.Functions.CLVFunction">
            <summary>
            CLV Function.
            </summary>
        </member>
        <member name="M:Steema.TeeChart.Functions.CLVFunction.AddPoints(System.Array)">
            <summary>
            Gets all points from Source series, performs a function operation on points and stores results in ParentSeries.
            </summary>
        </member>
        <member name="P:Steema.TeeChart.Functions.CLVFunction.Accumulate">
            <summary>
            Accumulates the CLV Function results.
            </summary>
        </member>
        <member name="P:Steema.TeeChart.Functions.CLVFunction.Volume">
            <summary>
            Gets/sets the Volume series by which CLV results are multiplied.
            </summary>
        </member>
        <member name="T:Steema.TeeChart.Editors.Export.JPEGOptions">
            <summary>
            JPEG Export Format.
            </summary>
        </member>
        <member name="F:Steema.TeeChart.Editors.Export.JPEGOptions.components">
            <summary>
            Required designer variable.
            </summary>
        </member>
        <member name="M:Steema.TeeChart.Editors.Export.JPEGOptions.Dispose(System.Boolean)">
            <summary>
            Clean up any resources being used.
            </summary>
        </member>
        <member name="M:Steema.TeeChart.Editors.Export.JPEGOptions.InitializeComponent">
            <summary>
            Required method for Designer support - do not modify
            the contents of this method with the code editor.
            </summary>
        </member>
        <member name="M:Steema.TeeChart.Editors.Tools.NearestPointEditor.Dispose(System.Boolean)">
            <summary>
            Clean up any resources being used.
            </summary>
        </member>
        <member name="M:Steema.TeeChart.Editors.Tools.NearestPointEditor.InitializeComponent">
            <summary>
            Required method for Designer support - do not modify
            the contents of this method with the code editor.
            </summary>
        </member>
        <member name="T:Steema.TeeChart.Editors.Series.WaterfallSeries">
            <summary>
            Summary description for WaterfallEdit.
            </summary>
        </member>
        <member name="F:Steema.TeeChart.Editors.Series.WaterfallSeries.components">
            <summary>
            Required designer variable.
            </summary>
        </member>
        <member name="M:Steema.TeeChart.Editors.Series.WaterfallSeries.Dispose(System.Boolean)">
            <summary>
            Clean up any resources being used.
            </summary>
        </member>
        <member name="M:Steema.TeeChart.Editors.Series.WaterfallSeries.InitializeComponent">
            <summary>
            Required method for Designer support - do not modify
            the contents of this method with the code editor.
            </summary>
        </member>
        <member name="F:Steema.TeeChart.Editors.Series.TernarySeries.components">
            <summary>
            Required designer variable.
            </summary>
        </member>
        <member name="M:Steema.TeeChart.Editors.Series.TernarySeries.Dispose(System.Boolean)">
            <summary>
            Clean up any resources being used.
            </summary>
            <param name="disposing">true if managed resources should be disposed; otherwise, false.</param>
        </member>
        <member name="M:Steema.TeeChart.Editors.Series.TernarySeries.InitializeComponent">
            <summary>
            Required method for Designer support - do not modify
            the contents of this method with the code editor.
            </summary>
        </member>
        <member name="T:Steema.TeeChart.Editors.Series.CircularGaugeSeries">
            <summary>
            Summary description for GaugesEditor.
            </summary>
        </member>
        <member name="F:Steema.TeeChart.Editors.Series.CircularGaugeSeries.components">
            <summary>
            Required designer variable.
            </summary>
        </member>
        <member name="M:Steema.TeeChart.Editors.Series.CircularGaugeSeries.Dispose(System.Boolean)">
            <summary>
            Clean up any resources being used.
            </summary>
        </member>
        <member name="M:Steema.TeeChart.Editors.Series.CircularGaugeSeries.InitializeComponent">
            <summary>
            Required method for Designer support - do not modify
            the contents of this method with the code editor.
            </summary>
        </member>
        <member name="F:Steema.TeeChart.Editors.Series.KnobGaugeEditor.components">
            <summary>
            Required designer variable.
            </summary>
        </member>
        <member name="M:Steema.TeeChart.Editors.Series.KnobGaugeEditor.Dispose(System.Boolean)">
            <summary>
            Clean up any resources being used.
            </summary>
            <param name="disposing">true if managed resources should be disposed; otherwise, false.</param>
        </member>
        <member name="M:Steema.TeeChart.Editors.Series.KnobGaugeEditor.InitializeComponent">
            <summary>
            Required method for Designer support - do not modify
            the contents of this method with the code editor.
            </summary>
        </member>
        <member name="T:Steema.TeeChart.PaintChartEventHandler">
            <summary>Chart Paint Event Handler</summary>
        </member>
        <member name="T:Steema.TeeChart.ChartPrintEventHandler">
            <summary>Chart Print Event Handler</summary>
        </member>
        <member name="T:Steema.TeeChart.MouseEventKinds">
            <summary>
            Type of Mouse action
            </summary>
        </member>
        <member name="F:Steema.TeeChart.MouseEventKinds.Down">
            <summary>MouseButton down action</summary>
        </member>
        <member name="F:Steema.TeeChart.MouseEventKinds.Move">
            <summary>MouseMove</summary>
        </member>
        <member name="F:Steema.TeeChart.MouseEventKinds.Up">
            <summary>MouseButton Up action</summary>
        </member>
        <member name="F:Steema.TeeChart.MouseEventKinds.Wheel">
            <summary>MouseWheel action</summary>
        </member>
        <member name="T:Steema.TeeChart.Chart">
            <summary>
            Chart contents. See <see cref="T:Steema.TeeChart.TChart"/> and <see cref="T:Steema.TeeChart.Web.WebChart"/> for use.
            </summary>
        </member>
        <member name="M:Steema.TeeChart.Chart.GetDefaultColor(System.Int32)">
            <summary>
            Returns a color from global ColorPalette array variable.
            </summary>
        </member>
        <member name="M:Steema.TeeChart.Chart.ActiveSeriesLegend(System.Int32)">
            <summary>
            Returns the Active series (visible) that corresponds to the	
            ItemIndex position in the Legend
            </summary>
        </member>
        <member name="M:Steema.TeeChart.Chart.SeriesTitleLegend(System.Int32,System.Boolean)">
            <summary>
             Returns the Series.Title string.
            </summary>
        </member>
        <member name="M:Steema.TeeChart.Chart.InternalDraw(System.Drawing.Graphics,System.Boolean)">
            <summary>
            Main drawing procedure. Paints all Chart contents.
            </summary>
        </member>
        <member name="M:Steema.TeeChart.Chart.Bitmap(System.Int32,System.Int32,System.Drawing.Imaging.PixelFormat)">
            <summary>
            Saves the current chart image to the specified File Name.
            </summary>
        </member>
        <member name="M:Steema.TeeChart.Chart.Bitmap(System.Int32,System.Int32)">
            <summary>
            Saves the current chart image to the specified File Name.
            </summary>
        </member>
        <member name="M:Steema.TeeChart.Chart.Bitmap">
            <summary>
            Saves the current chart image to the specified File Name.
            </summary>
        </member>
        <member name="M:Steema.TeeChart.Chart.CanClip">
            <summary>
            Returns the number of active (visible) series.
            </summary>
            <returns>Number of Active (visible) Series.</returns>
        </member>
        <member name="M:Steema.TeeChart.Chart.NoActiveSeries(Steema.TeeChart.Axis)">
            <summary>
            Returns if no series are active (visible) and associated to the Axis "a" parameter.
            </summary>
        </member>
        <member name="M:Steema.TeeChart.Chart.GetAxisSeries(Steema.TeeChart.Axis)">
            <summary>
            Returns the first Series that depends on the specified Axis.
            </summary>
        </member>
        <member name="M:Steema.TeeChart.Chart.MaxTextWidth">
            <summary>
            Returns the width in pixels for the longest "Label" 
            of all series, active or not.
            </summary>
        </member>
        <member name="M:Steema.TeeChart.Chart.MaxTextHeight(Steema.TeeChart.Axis)">
            <summary>
            Returns the height in pixels for the tallest "Label" 
            of Axis, active or not.
            </summary>
        </member>
        <member name="M:Steema.TeeChart.Chart.MaxMarkWidth">
            <summary>
            Returns the longest width in pixels for all the active (visible) series marks.
            </summary>
        </member>
        <member name="M:Steema.TeeChart.Chart.MaxXValue(Steema.TeeChart.Axis)">
            <summary>
            Returns the Maximum Value of the Series X Values List.
            </summary>
        </member>
        <member name="M:Steema.TeeChart.Chart.MaxYValue(Steema.TeeChart.Axis)">
            <summary>
            Returns the highest of all the current Series Y point values.
            </summary>
        </member>
        <member name="M:Steema.TeeChart.Chart.MinXValue(Steema.TeeChart.Axis)">
            <summary>
            Returns the Minimum Value of the Series X Values List.
            </summary>
        </member>
        <member name="M:Steema.TeeChart.Chart.MinYValue(Steema.TeeChart.Axis)">
            <summary>
            Returns the Minimum Value of the Series Y Values List.
            </summary>
        </member>
        <member name="M:Steema.TeeChart.Chart.IsFreeSeriesColor(System.Drawing.Color,System.Boolean)">
            <summary>
            Returns whether the AColor parameter is used by any Series or not.
            </summary>
            <param name="color">Color</param>
            <param name="checkBackground">When true, uses current Chart background</param>
        </member>
        <member name="M:Steema.TeeChart.Chart.FreeSeriesColor(System.Boolean)">
            <summary>
            Returns a color from the default color palette not used by any Series.
            </summary>
        </member>
        <member name="M:Steema.TeeChart.Chart.Draw(System.Drawing.Graphics)">
            <summary>
            Paints the Chart on the Drawing Canvas g. 
            </summary>
        </member>
        <member name="M:Steema.TeeChart.Chart.GetASeries">
            <summary>
            Returns first active (visible) series.
            </summary>
        </member>
        <member name="M:Steema.TeeChart.Chart.FormattedValueLegend(Steema.TeeChart.Styles.Series,System.Int32)">
            <summary>
            Returns the string to display at Legend for a given series and point index.
            </summary>
        </member>
        <member name="M:Steema.TeeChart.Chart.CountActiveSeries">
            <summary>
            Returns the number of active (visible) series.
            </summary>
            <returns>Number of Active (visible) Series.</returns>
        </member>
        <member name="M:Steema.TeeChart.Chart.SeriesLegend(System.Int32,System.Boolean)">
            <summary>
            When the Legend style is "Series", returns the series that 
            corresponds to the Legend "ItemIndex" position. The 
            "OnlyActive" parameter, when false takes into account all 
            series, visibly active or not.
            </summary>
        </member>
        <member name="M:Steema.TeeChart.Chart.FormattedLegend(System.Int32)">
            <summary>
            Returns the text string corresponding to a Legend position.
            </summary>
        </member>
        <member name="P:Steema.TeeChart.Chart.ChartBounds">
            <summary>
            Read only. Used to get the four sides of the Chart (Left, Top, Right and Bottom)
            </summary>
        </member>
        <member name="P:Steema.TeeChart.Chart.Width">
            <summary>
            Sets the Chart Width in pixels.
            </summary>
        </member>
        <member name="P:Steema.TeeChart.Chart.MaxZOrder">
            <summary>
            Run-time and read only. The MaxZOrder property indicates the Chart depth in number 
            of Series. When Chart.View3D is True, each Series has a Z order. The Series 
            Z order defines the order along the Z axis when Series are displayed. 
            The MaxZOrder property is the maximum Z order of all active Series. 
            Some Series share a same Z order (stacked Bars, stacked Areas, etc).
            </summary>
        </member>
        <member name="P:Steema.TeeChart.Chart.Height">
            <summary>
            Sets the Chart Height in pixels.
            </summary>
        </member>
        <member name="P:Steema.TeeChart.Chart.Listeners">
            <summary>
            Returns array list of objects that implement the ITeeEventListener interface.
            </summary>
        </member>
        <member name="P:Steema.TeeChart.Chart.SerializedTag">
            <summary>
            Holds a custom tag object.
            </summary>
        </member>
        <member name="P:Steema.TeeChart.Chart.ToolTip">
            <summary>
            Displays a text box at the cursor.
            </summary>
        </member>
        <member name="P:Steema.TeeChart.Chart.Zoom">
            <summary>
            Accesses the Zoom characteristics of the Chart.
            </summary>
        </member>
        <member name="P:Steema.TeeChart.Chart.Panning">
            <summary>
            Sets the scrolling direction or denies scrolling.
            </summary>
        </member>
        <member name="P:Steema.TeeChart.Chart.Item(System.Int32)">
            <summary>
            Default indexer ( Example: tChart1[0].Color=Color.Blue; is equivalent to tChart1.Series[0].Color=Color.Blue; )
            </summary>
        </member>
        <member name="P:Steema.TeeChart.Chart.Parent">
            <summary>
            The IChart parent of the Chart.
            </summary>
        </member>
        <member name="P:Steema.TeeChart.Chart.Panel">
            <summary>
            Background visible attributes.
            </summary>
        </member>
        <member name="P:Steema.TeeChart.Chart.Printer">
            <summary>
            Printing related properties.
            </summary>
        </member>
        <member name="P:Steema.TeeChart.Chart.Page">
            <summary>
            Accesses multiple page characteristics of the Chart.
            </summary>
        </member>
        <member name="P:Steema.TeeChart.Chart.Legend">
            <summary>
            Legend characteristics.
            </summary>
        </member>
        <member name="P:Steema.TeeChart.Chart.Header">
            <summary>
            Defines Text shown at top of the Chart.
            </summary>
        </member>
        <member name="P:Steema.TeeChart.Chart.SubHeader">
            <summary>
            Defines Text shown directly below Header.
            </summary>
        </member>
        <member name="P:Steema.TeeChart.Chart.Footer">
            <summary>
            Defines Text shown at the bottom of the Chart.
            </summary>
        </member>
        <member name="P:Steema.TeeChart.Chart.SubFooter">
            <summary>
            Defines Text shown directly above Footer.
            </summary>
        </member>
        <member name="P:Steema.TeeChart.Chart.Aspect">
            <summary>
            3D view parameters.
            </summary>
        </member>
        <member name="P:Steema.TeeChart.Chart.Graphics3D">
            <summary>
            Accesses TeeChart Draw properties and methods.
            </summary>
        </member>
        <member name="P:Steema.TeeChart.Chart.Series">
            <summary>
            Collection of Series contained in this Chart.
            </summary>
        </member>
        <member name="P:Steema.TeeChart.Chart.Tools">
            <summary>
            Collection of Tool components contained in this Chart.
            </summary>
        </member>
        <member name="P:Steema.TeeChart.Chart.Animations">
            <summary>
            Collection of Animation components contained in this Chart.
            </summary>
        </member>
        <member name="P:Steema.TeeChart.Chart.Walls">
            <summary>
            Accesses left, bottom and back wall characteristics of the Chart.
            </summary>
        </member>
        <member name="P:Steema.TeeChart.Chart.Axes">
            <summary>
            Collection of predefined and custom axis objects.
            </summary>
        </member>
        <member name="P:Steema.TeeChart.Chart.Export">
            <summary>
            Accesses Chart export properties and methods.
            </summary>
        </member>
        <member name="P:Steema.TeeChart.Chart.Import">
            <summary>
            Accesses Chart import properties and methods.
            </summary>
        </member>
        <member name="T:Steema.TeeChart.Chart.ChartToolTip">
            <summary>
            Tooltips
            </summary>
        </member>
        <member name="M:Steema.TeeChart.Chart.ChartToolTip.Hide">
            <summary>
            Hides a ToolTip.
            </summary>
        </member>
        <member name="M:Steema.TeeChart.Chart.ChartToolTip.Show">
            <summary>
            Makes Visible a ToolTip. 
            </summary>
        </member>
        <member name="P:Steema.TeeChart.Chart.ChartToolTip.ForeColor">
            <summary>
            Gets or sets the foreground color for the ToolTip.
            </summary>
        </member>
        <member name="P:Steema.TeeChart.Chart.ChartToolTip.BackColor">
            <summary>
            Gets or sets the background color for the ToolTip.
            </summary>
        </member>
        <member name="P:Steema.TeeChart.Chart.ChartToolTip.InitialDelay">
            <summary>
            Sets the time lag before the Tool Tip appears.
            </summary>
        </member>
        <member name="P:Steema.TeeChart.Chart.ChartToolTip.AutoPopDelay">
            <summary>
            Gets or sets the period of time the ToolTip remains visible if the pointer is stationary on a control with specified ToolTip text. 
            </summary>
        </member>
        <member name="T:Steema.TeeChart.TeeChartException">
            <summary>
            Underlying TeeChart exception class
            </summary>
        </member>
        <member name="T:Steema.TeeChart.TeeMouseEvent">
            <summary>
            Internal use. Mouse events
            </summary>
        </member>
        <member name="F:Steema.TeeChart.Tools.ScrollToolViewUnit.percent">
            <summary>
            Sets the location as a Percentage of Chart width.
            </summary>
        </member>
        <member name="F:Steema.TeeChart.Tools.ScrollToolViewUnit.axisvalue">
            <summary>
            Sets the location as an Axis value.
            </summary>
        </member>
        <member name="F:Steema.TeeChart.Tools.ScrollMouseAction.none">
            <summary>
            No buttondown mouseover action.
            </summary>
        </member>
        <member name="F:Steema.TeeChart.Tools.ScrollMouseAction.drag">
            <summary>
            Mouse will drag Chart when mousebutton down.
            </summary>
        </member>
        <member name="T:Steema.TeeChart.Tools.ScrollTool">
            <summary>
            Tool to make active scrollable WebCharts
            </summary>
        </member>
        <member name="P:Steema.TeeChart.Tools.ScrollTool.Description">
            <summary>
            Gets descriptive text.
            </summary>
        </member>
        <member name="P:Steema.TeeChart.Tools.ScrollTool.Summary">
            <summary>
            Gets detailed descriptive text.
            </summary>
        </member>
        <member name="P:Steema.TeeChart.Tools.ScrollTool.ViewSegmentSize">
            <summary>
            Percentage of Chart to be in view
            </summary>
        </member>
        <member name="P:Steema.TeeChart.Tools.ScrollTool.MouseAction">
            <summary>
            Sets the action for the Mouse when dragged over the Scrollable Chart.
            </summary>
        </member>
        <member name="P:Steema.TeeChart.Tools.ScrollTool.StartPosition">
            <summary>
            Start position when opening Chart. May be expressed as percentage location
            or as Axis value. See <see cref="P:Steema.TeeChart.Tools.ScrollTool.SegmentViewUnits"/>.
            </summary>
        </member>
        <member name="P:Steema.TeeChart.Tools.ScrollTool.SegmentViewUnits">
            <summary>
            Units used to set View Segment Size and Start Position when opening Chart for view.
            </summary>
        </member>
        <member name="P:Steema.TeeChart.Tools.ScrollTool.Attributes">
            <summary>
            Supporting attributes for ZoomTool rendering
            </summary>
        </member>
        <member name="T:Steema.TeeChart.Styles.Renko">
            <summary>
            The Renko chart financial indicator.
            </summary>
            <remarks><para>The Renko chart is a trend following technique. It got its name from a Japanese word "renga" meaning bricks. 
            In Renko chart line brick is drawn in the direction of the prior move only if prices move by a minimum amount 
            which is equivalent to the box size that are always equal in size.</para>
            <para>Renko charts are always based on the closing prices. Renko bricks are drawn after comparing, that day’s close
            with the previous brick (high or low). A "box size" which determines the minimum price change to show is specified.</para>
            </remarks>
        </member>
        <member name="M:Steema.TeeChart.Styles.Renko.NumBricks(System.Double,System.Double)">
            <summary>
            Number of bricks
            </summary>
            <param name="cur">Current value</param>
            <param name="pre">Previous value</param>
            <returns>Number of bricks</returns>
        </member>
        <member name="M:Steema.TeeChart.Styles.Renko.CalcFirstLastVisibleIndex">
            <summary>
            Seems to work fine ... but better check it so it doesn't break something else.
            </summary>
        </member>
        <member name="P:Steema.TeeChart.Styles.Renko.BoxSize">
            <summary>
            Renko chart box size.
            </summary>
        </member>
        <member name="P:Steema.TeeChart.Styles.Renko.UpSwingColor">
            <summary>
            Color for upward trend bricks.
            </summary>
        </member>
        <member name="P:Steema.TeeChart.Styles.Renko.DownSwingColor">
            <summary>
            Color for downward trend bricks.
            </summary>
        </member>
        <member name="P:Steema.TeeChart.Styles.Renko.CloseValues">
            <summary>
            Trading close values.
            </summary>
        </member>
        <member name="T:Steema.TeeChart.Styles.FastLine">
             <summary>
            The FastLine Series is an extremely simple Series component that draws its points as fast as possible.  
             </summary>
        </member>
        <member name="M:Steema.TeeChart.Styles.FastLine.Clicked(System.Int32,System.Int32)">
            <summary>
            Returns the ValueIndex of the "clicked" point in the Series.
            </summary>
        </member>
        <member name="M:Steema.TeeChart.Styles.FastLine.DrawValue(System.Int32)">
            <summary>
            Called internally. Draws the "ValueIndex" point of the Series.
            </summary>
        </member>
        <member name="T:Steema.TeeChart.Styles.Arrow">
            <summary>
            Arrow Series.
            </summary>
        </member>
        <member name="M:Steema.TeeChart.Styles.Arrow.Add(System.Double,System.Double,System.Double,System.Double)">
            <summary>
            Adds an Arrow with start and end coordinates.
            </summary>
        </member>
        <member name="M:Steema.TeeChart.Styles.Arrow.Add(System.Double,System.Double,System.Double,System.Double,System.String)">
            <summary>
            Adds an Arrow with start and end coordinates and label.
            </summary>
        </member>
        <member name="M:Steema.TeeChart.Styles.Arrow.Add(System.Double,System.Double,System.Double,System.Double,System.Drawing.Color)">
            <summary>
            Adds an Arrow with start and end coordinates and color.
            </summary>
        </member>
        <member name="M:Steema.TeeChart.Styles.Arrow.Add(System.Double,System.Double,System.Double,System.Double,System.String,System.Drawing.Color)">
            <summary>
            Adds an Arrow with start and end coordinates, label and color.
            </summary>
        </member>
        <member name="M:Steema.TeeChart.Styles.Arrow.MaxXValue">
            <summary>
            Returns the Maximum Value of the Series X Values List.
            </summary>
        </member>
        <member name="M:Steema.TeeChart.Styles.Arrow.MinXValue">
            <summary>
            Returns the Minimum Value of the Series X Values List.
            </summary>
        </member>
        <member name="M:Steema.TeeChart.Styles.Arrow.MaxYValue">
            <summary>
            Returns the Maximum Value of the Series Y Values List.
            </summary>
        </member>
        <member name="M:Steema.TeeChart.Styles.Arrow.MinYValue">
            <summary>
            Returns the Minimum Value of the Series Y Values List.
            </summary>
        </member>
        <member name="M:Steema.TeeChart.Styles.Arrow.DrawValue(System.Int32)">
            <summary>
            Called internally. Draws the "ValueIndex" point of the Series.
            </summary>
        </member>
        <member name="P:Steema.TeeChart.Styles.Arrow.ArrowHeight">
            <summary>
            Determines the vertical arrow head size in pixels.
            </summary>
        </member>
        <member name="P:Steema.TeeChart.Styles.Arrow.ArrowWidth">
            <summary>
            Determines the horizontal arrow head size in pixels.
            </summary>
        </member>
        <member name="P:Steema.TeeChart.Styles.Arrow.StartXValues">
            <summary>
            Sets X0 values for Arrows.
            </summary>
        </member>
        <member name="P:Steema.TeeChart.Styles.Arrow.StartYValues">
            <summary>
            Sets Y0 values for Arrows.
            </summary>
        </member>
        <member name="P:Steema.TeeChart.Styles.Arrow.EndXValues">
            <summary>
            Sets X1 values for Arrows.
            </summary>
        </member>
        <member name="P:Steema.TeeChart.Styles.Arrow.EndYValues">
            <summary>
            Sets Y1 values for Arrows.
            </summary>
        </member>
        <member name="P:Steema.TeeChart.Styles.Arrow.Description">
            <summary>
            Gets descriptive text.
            </summary>
        </member>
        <member name="T:Steema.TeeChart.Styles.MultiAreas">
             <summary>
            Describes the possible values of the <see cref="P:Steema.TeeChart.Styles.Area.MultiArea"/> property. 
             </summary>
        </member>
        <member name="F:Steema.TeeChart.Styles.MultiAreas.None">
             <summary>
            Areas will be drawn one behind the other. 
             </summary>
        </member>
        <member name="F:Steema.TeeChart.Styles.MultiAreas.Stacked">
             <summary>
            Draws each Area on top of previous one. 
             </summary>
        </member>
        <member name="F:Steema.TeeChart.Styles.MultiAreas.Stacked100">
             <summary>
            Adjusts each individual point to a common 0..100 axis scale.
             </summary>
        </member>
        <member name="T:Steema.TeeChart.Styles.Area">
            <summary>
            Area Series
            </summary>
        </member>
        <member name="M:Steema.TeeChart.Styles.Area.MaxYValue">
            <summary>
            Returns the highest of all the current Series Y point values.
            </summary>
        </member>
        <member name="M:Steema.TeeChart.Styles.Area.MinYValue">
            <summary>
            Returns the Minimum Value of the Series Y Values List.
            </summary>
        </member>
        <member name="P:Steema.TeeChart.Styles.Area.MultiArea">
            <summary>
            Determines how Multi-AreaSeries are displayed.
            </summary>
        </member>
        <member name="P:Steema.TeeChart.Styles.Area.AreaBrush">
            <summary>
            Determines Brush to fill the background Area region.
            </summary>
        </member>
        <member name="P:Steema.TeeChart.Styles.Area.TopGradient">
            <summary>
            Determines to fill the top 3D Area region.
            </summary>
        </member>
        <member name="P:Steema.TeeChart.Styles.Area.GradientRelative">
             <summary>
            Gets and sets a value which when true calculates the Gradient relative to each point.
            When false, the Gradient is calculated with respect to the entire Gradient area. 
             </summary>
        </member>
        <member name="P:Steema.TeeChart.Styles.Area.Gradient">
            <summary>
            Determines Gradient to fill the background Area region.
            </summary>
        </member>
        <member name="P:Steema.TeeChart.Styles.Area.AreaLines">
            <summary>
            Determines Pen to draw AreaLines.
            </summary>
        </member>
        <member name="P:Steema.TeeChart.Styles.Area.UseOrigin">
            <summary>
            Aligns bottom of AreaSeries to the Origin property value.
            </summary>
        </member>
        <member name="P:Steema.TeeChart.Styles.Area.Origin">
            <summary>
            Sets axis value as a common bottom for all AreaSeries points.
            </summary>
        </member>
        <member name="P:Steema.TeeChart.Styles.Area.Description">
            <summary>
            Gets descriptive text.
            </summary>
        </member>
        <member name="T:Steema.TeeChart.LegendSymbolPosition">
             <summary>
            Describes the position of the Legend's color rectangles. 
             </summary>
        </member>
        <member name="F:Steema.TeeChart.LegendSymbolPosition.Left">
             <summary>
            Defines the left positioning of the Legend's color rectangles.   
             </summary>
        </member>
        <member name="F:Steema.TeeChart.LegendSymbolPosition.Right">
             <summary>
            Defines the right positioning of the Legend's color rectangles. 
             </summary>
        </member>
        <member name="T:Steema.TeeChart.LegendSymbolSize">
             <summary>
            Describes the units in which to define the size of the Legend's color rectangles.
             </summary>
        </member>
        <member name="F:Steema.TeeChart.LegendSymbolSize.Percent">
             <summary>
            Defines the units as a Percentage of the Legend width. 
             </summary>
        </member>
        <member name="F:Steema.TeeChart.LegendSymbolSize.Pixels">
             <summary>
            Defines the units as Pixels. 
             </summary>
        </member>
        <member name="T:Steema.TeeChart.LegendItems">
            <summary>
            Specialized List class to hold Legend items of type <see cref="T:Steema.TeeChart.LegendItem"/>.
            </summary>
        </member>
        <member name="P:Steema.TeeChart.LegendItems.Custom">
            <summary>
            When True, legend does not automatically calculate the legend items to be displayed, and it uses the Items property instead.
            </summary>
        </member>
        <member name="P:Steema.TeeChart.LegendItems.AutoPosition">
            <summary>
            Gets or sets whether legend items positioning is automatically calculated when <see cref="P:Steema.TeeChart.LegendItems.Custom"/> is set to true.
            </summary>
        </member>
        <member name="P:Steema.TeeChart.LegendItems.Item(System.Int32)">
            <summary>
            Access indexed Label characteristics
            </summary>
        </member>
        <member name="T:Steema.TeeChart.LegendItem">
            <summary>
            The LegendItem class describes characteristics of each item that are placed on the Legend.
            </summary>
        </member>
        <member name="P:Steema.TeeChart.LegendItem.SymbolRectangle">
            <summary>
            Gets or sets a Rectangle for the legend item symbol.
            </summary>
        </member>
        <member name="P:Steema.TeeChart.LegendItem.Align">
            <summary>
            Gets and sets the Text alignment options
            </summary>
        </member>
        <member name="P:Steema.TeeChart.LegendItem.Left">
            <summary>
            Gets and sets the Left position of the referenced legend item.
            </summary>
        </member>
        <member name="P:Steema.TeeChart.LegendItem.Top">
            <summary>
            Gets and sets the Top position of the referenced legend item.
            </summary>
        </member>
        <member name="P:Steema.TeeChart.LegendItem.Text">
            <summary>
            Gets or sets a Text for the referenced legend item.
            </summary>
        </member>
        <member name="P:Steema.TeeChart.LegendItem.Text2">
            <summary>
            Returns the text displayed at Legend item in second column. 
            </summary>
        </member>
        <member name="T:Steema.TeeChart.LegendSymbol">
            <summary>
            Legend item symbol characteristics
            </summary>
        </member>
        <member name="P:Steema.TeeChart.LegendSymbol.Width">
            <summary>
            Defines the width of the color rectangles (symbols).
            </summary>
        </member>
        <member name="P:Steema.TeeChart.LegendSymbol.Position">
            <summary>
            Sets the position of the Legend color rectangles.
            </summary>
        </member>
        <member name="P:Steema.TeeChart.LegendSymbol.WidthUnits">
            <summary>
            Defines the Width units for the width of Symbol.
            </summary>
        </member>
        <member name="P:Steema.TeeChart.LegendSymbol.Continous">
            <summary>
            Adjoins the different legend rectangles when true.
            </summary>
        </member>
        <member name="P:Steema.TeeChart.LegendSymbol.DefaultPen">
            <summary>
            Uses series pen properties to draw a border around the coloured box legend symbol, when true. 
            </summary>
        </member>
        <member name="P:Steema.TeeChart.LegendSymbol.Pen">
            <summary>
            Pen used to draw a border around the color box legend symbols.
            </summary>
        </member>
        <member name="P:Steema.TeeChart.LegendSymbol.Squared">
            <summary>
            When true, the legend symbol will be resized to square shaped.
            </summary>
        </member>
        <member name="P:Steema.TeeChart.LegendSymbol.Visible">
            <summary>
            Shows or hides Legend symbols.
            </summary>
        </member>
        <member name="P:Steema.TeeChart.LegendSymbol.Shadow">
            <summary>
            Sets a shadow around the Legend symbols.
            </summary>
        </member>
        <member name="T:Steema.TeeChart.LegendStyles">
             <summary>
            Describes the possible values of the <see cref="P:Steema.TeeChart.Legend.LegendStyle"/> property.
             </summary>
        </member>
        <member name="F:Steema.TeeChart.LegendStyles.Auto">
             <summary>
            Legend draws Series Titles if there's more than one Series in the TChart.
             </summary>
        </member>
        <member name="F:Steema.TeeChart.LegendStyles.Series">
             <summary>
            Legend draws the Series Titles even if there's only one Series in the chart.
             </summary>
        </member>
        <member name="F:Steema.TeeChart.LegendStyles.Values">
             <summary>
            Legend draws the first Active Series' values.
             </summary>
        </member>
        <member name="F:Steema.TeeChart.LegendStyles.LastValues">
             <summary>
            Legend draws the Last Value of each Active Series (similar to Series).
             </summary>
        </member>
        <member name="F:Steema.TeeChart.LegendStyles.Palette">
             <summary>
            Legend draws a number of the Palette entries defined by <see cref="P:Steema.TeeChart.Legend.MaxNumRows"/>. 
             </summary>
        </member>
        <member name="T:Steema.TeeChart.LegendTextStyles">
             <summary>
            Describes the possible values of the <see cref="P:Steema.TeeChart.Legend.TextStyle"/> property.
             </summary>
        </member>
        <member name="F:Steema.TeeChart.LegendTextStyles.Plain">
             <summary>
            Legend Text is defined as the series point labels. 
             </summary>
        </member>
        <member name="F:Steema.TeeChart.LegendTextStyles.LeftValue">
             <summary>
            Legend Text is defined as the series values on the left of the series point labels.  
             </summary>
        </member>
        <member name="F:Steema.TeeChart.LegendTextStyles.RightValue">
             <summary>
            Legend Text is defined as the series values on the right of the series point labels.   
             </summary>
        </member>
        <member name="F:Steema.TeeChart.LegendTextStyles.LeftPercent">
             <summary>
            Legend Text is defined as the series values as a percentage of the total of series values on the left of the series point labels.   
             </summary>
        </member>
        <member name="F:Steema.TeeChart.LegendTextStyles.RightPercent">
             <summary>
            Legend Text is defined as the series values as a percentage of the total of series values on the right of the series point labels.    
             </summary>
        </member>
        <member name="F:Steema.TeeChart.LegendTextStyles.XValue">
             <summary>
            Legend Text is defined as the xvalues of the series. 
             </summary>
        </member>
        <member name="F:Steema.TeeChart.LegendTextStyles.Value">
             <summary>
            Legend Text is defined as the series value. 
             </summary>
        </member>
        <member name="F:Steema.TeeChart.LegendTextStyles.Percent">
             <summary>
            Legend Text is defined as the series values as a percentage of the total of series values 
             </summary>
        </member>
        <member name="F:Steema.TeeChart.LegendTextStyles.XAndValue">
             <summary>
            Legend Text is defined as xvalues of the series and the series values. 
             </summary>
        </member>
        <member name="F:Steema.TeeChart.LegendTextStyles.XAndPercent">
             <summary>
            Legend Text is defined as xvalues of the series and the series values as a percentage of the total of series values. 
             </summary>
        </member>
        <member name="T:Steema.TeeChart.LegendAlignments">
             <summary>
            Describes the possible values of the <see cref="P:Steema.TeeChart.Legend.Alignment"/> property 
             </summary>
        </member>
        <member name="F:Steema.TeeChart.LegendAlignments.Left">
             <summary>
            Aligns the legend to the left of the TChart. 
             </summary>
        </member>
        <member name="F:Steema.TeeChart.LegendAlignments.Right">
             <summary>
            Aligns the legend to the right of the TChart.  
             </summary>
        </member>
        <member name="F:Steema.TeeChart.LegendAlignments.Top">
             <summary>
            Aligns the legend to the top of the TChart.  
             </summary>
        </member>
        <member name="F:Steema.TeeChart.LegendAlignments.Bottom">
             <summary>
            Aligns the legend to the bottom of the TChart.  
             </summary>
        </member>
        <member name="T:Steema.TeeChart.Legend">
            <summary>
            Access to all Chart Legend characteristics
            </summary>
        </member>
        <member name="M:Steema.TeeChart.Legend.Clicked(System.Int32,System.Int32)">
            <summary>
            Returns the index of the clicked Legend Point.
            </summary>
        </member>
        <member name="M:Steema.TeeChart.Legend.FormattedLegend(System.Int32)">
            <summary>
            Returns the text string corresponding to a Legend position.
            </summary>
        </member>
        <member name="M:Steema.TeeChart.Legend.FormattedValue(Steema.TeeChart.Styles.Series,System.Int32)">
            <summary>
            Returns the corresponding Legend text for the Series ValueIndex point.
            </summary>
        </member>
        <member name="P:Steema.TeeChart.Legend.TextStyle">
            <summary>
             Determines how Legend text items will be formatted.
            </summary>
        </member>
        <member name="P:Steema.TeeChart.Legend.Series">
            <summary>
            Determine which series is used as data for the Legend entries.
            </summary>
        </member>
        <member name="P:Steema.TeeChart.Legend.CheckBoxes">
            <summary>
            Enables/disables the display of Legend check boxes.
            </summary>
        </member>
        <member name="P:Steema.TeeChart.Legend.CurrentPage">
            <summary>
            Legend shows only the current page items when the Chart is divided into pages.
            </summary>
        </member>
        <member name="P:Steema.TeeChart.Legend.FontSeriesColor">
            <summary>
            Sets the font color of the legend text to that of the Series color, or not.
            </summary>
        </member>
        <member name="P:Steema.TeeChart.Legend.DividingLines">
            <summary>
            Pen attributes used to draw lines separating Legend items.
            </summary>
        </member>
        <member name="P:Steema.TeeChart.Legend.Symbol">
            <summary>
            Sets the width and position of the color rectangle associated with each Legend item.
            </summary>
        </member>
        <member name="P:Steema.TeeChart.Legend.Inverted">
            <summary>
            When True, draws the Legend items in opposite direction.
            </summary>	
        </member>
        <member name="P:Steema.TeeChart.Legend.Alignment">
            <summary>
            The Alignment property defines the Legend position.
            </summary>
        </member>
        <member name="P:Steema.TeeChart.Legend.FirstValue">
            <summary>
            Defines which is the first Legend item displayed
            </summary>
        </member>
        <member name="P:Steema.TeeChart.Legend.TopLeftPos">
            <summary>
            Specifies the Legend's top position in percent of total chart height.
            </summary>
        </member>
        <member name="P:Steema.TeeChart.Legend.TextSymbolGap">
            <summary>
            Sets the space in pixels to the left of the Legend
            Text item. It may be used to increase the space
            between the text and the symbol.
            </summary>
        </member>
        <member name="P:Steema.TeeChart.Legend.MaxNumRows">
            <summary>
            Sets the Maximum number of Legend Rows to display for a horizontal (Chart Top or Bottom) Legend.
            </summary>
        </member>
        <member name="P:Steema.TeeChart.Legend.Lines">
             <summary>
            Access to the Legend's Array of Text lines.
             </summary>
        </member>
        <member name="P:Steema.TeeChart.Legend.Text">
            <summary>
            Use the Text property to add text to the Legend.
            </summary>
        </member>
        <member name="P:Steema.TeeChart.Legend.VertSpacing">
            <summary>
            Sets vertical spacing between Legend items (pixels).
            </summary>
        </member>
        <member name="P:Steema.TeeChart.Legend.HorizMargin">
            <summary>
            Speficies the number of screen pixels between Legend and Chart rectangles.
            </summary>
        </member>
        <member name="P:Steema.TeeChart.Legend.VertMargin">
            <summary>
            Determines the vertical margin in pixels between Legend and Chart rectangle.
            </summary>
        </member>
        <member name="P:Steema.TeeChart.Legend.Items">
            <summary>
            List of <see cref="T:Steema.TeeChart.LegendItem"/> objects.
            </summary>
        </member>
        <member name="P:Steema.TeeChart.Legend.Color">
            <summary>
            Changes the background color of the Legend box.
            </summary>
        </member>
        <member name="P:Steema.TeeChart.Legend.ResizeChart">
            <summary>
            Resizes Chart rectangle to prevent overlap with Legend.
            </summary>
        </member>
        <member name="P:Steema.TeeChart.Legend.LegendStyle">
            <summary>
            Defines which items will be displayed in Chart Legend.
            </summary>
        </member>
        <member name="P:Steema.TeeChart.Legend.Title">
            <summary>
            Sets the Title text and its characteristics at the top of the legend
            </summary>
        </member>
        <member name="P:Steema.TeeChart.Legend.Vertical">
            <summary>
             Is read only and returns True only if the legend is left or right aligned.
            </summary>
        </member>
        <member name="T:Steema.TeeChart.Functions.HistogramFunction">
            <summary>
            Constructs a histogram or cumulative histogram from data.
            </summary>
        </member>
        <member name="M:Steema.TeeChart.Functions.HistogramFunction.Histogram(System.Double[],System.Int32,System.Int32,System.Double[]@,System.Double[]@,System.Int32,System.Double,System.Double)">
            <summary>
            Constructs histogram from data double array.
            </summary>
            <param name="data">Defines data for histogram.</param>
            <param name="lb">Data lower bound.</param>
            <param name="ub">Data upper bound.</param>
            <param name="bins">Returns bins centerpoints.</param>
            <param name="counts">Returns each bin count.</param>
            <param name="nbins">Number of bins used in histogram. Value must match the bins and counts size.</param>
            <param name="min">Minimum value used for histogram. Usually it's data minimum value.</param>
            <param name="max">Maximum value used for histogram. Usually it's data maximum value.</param>
        </member>
        <member name="M:Steema.TeeChart.Functions.HistogramFunction.AddPoints(System.Array)">
            <summary>
            Gets all points from Source series, performs a function operation on points and stores results in ParentSeries.
            </summary>
        </member>
        <member name="P:Steema.TeeChart.Functions.HistogramFunction.IncludeNulls">
            <summary>
            Calculates the histogram using only the non-null points of a series, or not.
            </summary>
        </member>
        <member name="M:Steema.TeeChart.Editors.Tools.SurfaceNearestToolEditor.Dispose(System.Boolean)">
            <summary>
            Clean up any resources being used.
            </summary>
        </member>
        <member name="M:Steema.TeeChart.Editors.Tools.SurfaceNearestToolEditor.InitializeComponent">
            <summary>
            Required method for Designer support - do not modify
            the contents of this method with the code editor.
            </summary>
        </member>
        <member name="M:Steema.TeeChart.Editors.Tools.GridBandEditor.Dispose(System.Boolean)">
            <summary>
            Clean up any resources being used.
            </summary>
        </member>
        <member name="M:Steema.TeeChart.Editors.Tools.GridBandEditor.InitializeComponent">
            <summary>
            Required method for Designer support - do not modify
            the contents of this method with the code editor.
            </summary>
        </member>
        <member name="T:Steema.TeeChart.Editors.Series.PointFigure">
            <summary>
            Summary description for PointFigureEditor.
            </summary>
        </member>
        <member name="F:Steema.TeeChart.Editors.Series.PointFigure.components">
            <summary>
            Required designer variable.
            </summary>
        </member>
        <member name="M:Steema.TeeChart.Editors.Series.PointFigure.Dispose(System.Boolean)">
            <summary>
            Clean up any resources being used.
            </summary>
        </member>
        <member name="M:Steema.TeeChart.Editors.Series.PointFigure.InitializeComponent">
            <summary>
            Required method for Designer support - do not modify
            the contents of this method with the code editor.
            </summary>
        </member>
        <member name="T:Steema.TeeChart.Editors.Series.MapSeries">
            <summary>
            Map Series Editor.
            </summary>
        </member>
        <member name="M:Steema.TeeChart.Editors.Series.MapSeries.Dispose(System.Boolean)">
            <summary>
            Clean up any resources being used.
            </summary>
        </member>
        <member name="M:Steema.TeeChart.Editors.Series.MapSeries.InitializeComponent">
            <summary>
            Required method for Designer support - do not modify
            the contents of this method with the code editor.
            </summary>
        </member>
        <member name="T:Steema.TeeChart.Editors.PeriodEditor">
            <summary>
            Period and Function Options Editor.
            </summary>
        </member>
        <member name="F:Steema.TeeChart.Editors.PeriodEditor.components">
            <summary>
            Required designer variable.
            </summary>
        </member>
        <member name="M:Steema.TeeChart.Editors.PeriodEditor.Dispose(System.Boolean)">
            <summary>
            Clean up any resources being used.
            </summary>
        </member>
        <member name="M:Steema.TeeChart.Editors.PeriodEditor.InitializeComponent">
            <summary>
            Required method for Designer support - do not modify
            the contents of this method with the code editor.
            </summary>
        </member>
        <member name="M:Steema.TeeChart.Editors.GalleryByType.Dispose(System.Boolean)">
            <summary>
            Clean up any resources being used.
            </summary>
        </member>
        <member name="M:Steema.TeeChart.Editors.GalleryByType.InitializeComponent">
            <summary>
            Required method for Designer support - do not modify
            the contents of this method with the code editor.
            </summary>
        </member>
        <member name="P:Steema.TeeChart.Editors.GalleryByType.SeriesType">
            <summary>
            Returns the currently selected Series style at Gallery.
            </summary>
        </member>
        <member name="T:Steema.TeeChart.Editors.SmoothingFunctionEditor">
            <summary>
            Summary description for SmoothingFunctionEditor.
            </summary>
        </member>
        <member name="F:Steema.TeeChart.Editors.SmoothingFunctionEditor.components">
            <summary>
            Required designer variable.
            </summary>
        </member>
        <member name="M:Steema.TeeChart.Editors.SmoothingFunctionEditor.Dispose(System.Boolean)">
            <summary>
            Clean up any resources being used.
            </summary>
        </member>
        <member name="M:Steema.TeeChart.Editors.SmoothingFunctionEditor.InitializeComponent">
            <summary>
            Required method for Designer support - do not modify
            the contents of this method with the code editor.
            </summary>
        </member>
        <member name="T:Steema.TeeChart.Editors.OBVFunctionEditor">
            <summary>
            Summary description for OBVFunctionEditor.
            </summary>
        </member>
        <member name="F:Steema.TeeChart.Editors.OBVFunctionEditor.components">
            <summary>
            Required designer variable.
            </summary>
        </member>
        <member name="M:Steema.TeeChart.Editors.OBVFunctionEditor.Dispose(System.Boolean)">
            <summary>
            Clean up any resources being used.
            </summary>
        </member>
        <member name="M:Steema.TeeChart.Editors.OBVFunctionEditor.InitializeComponent">
            <summary>
            Required method for Designer support - do not modify
            the contents of this method with the code editor.
            </summary>
        </member>
        <member name="T:Steema.TeeChart.Editors.AspectEditor">
            <summary>
            Summary description for AspectEditor.
            </summary>
        </member>
        <member name="F:Steema.TeeChart.Editors.AspectEditor.components">
            <summary>
            Required designer variable.
            </summary>
        </member>
        <member name="M:Steema.TeeChart.Editors.AspectEditor.Dispose(System.Boolean)">
            <summary>
            Clean up any resources being used.
            </summary>
        </member>
        <member name="M:Steema.TeeChart.Editors.AspectEditor.InitializeComponent">
            <summary>
            Required method for Designer support - do not modify
            the contents of this method with the code editor.
            </summary>
        </member>
        <!-- Badly formed XML comment ignored for member "T:Steema.TeeChart.Data.XmlSource" -->
        <member name="T:Steema.TeeChart.Data.SeriesSource">
            <summary>
            Abstract class to define Series.DataSource components.
            </summary>
        </member>
[truncated: 468,031 more chars]
