# Supplementary material
Source: MDPI journal article supplement (https://www.mdpi.com/2077-1312/10/8/1051)
Supplement: s1 [file s1 › OSNSystem/OSNSystem/OSNSystem/cmdCollectSet.Designer.cs]

namespace OSNSystem
{
    partial class cmdCollectSet
    {
        /// <summary>
        /// Required designer variable.
        /// </summary>
        private System.ComponentModel.IContainer components = null;

        /// <summary>
        /// Clean up any resources being used.
        /// </summary>
        /// <param name="disposing">true if managed resources should be disposed; otherwise, false.</param>
        protected override void Dispose(bool disposing)
        {
            if (disposing && (components != null))
            {
                components.Dispose();
            }
            base.Dispose(disposing);
        }

        #region Windows Form Designer generated code

        /// <summary>
        /// Required method for Designer support - do not modify
        /// the contents of this method with the code editor.
        /// </summary>
        private void InitializeComponent()
        {
            this.components = new System.ComponentModel.Container();
            this.groupBox1 = new System.Windows.Forms.GroupBox();
            this.tbxTime = new System.Windows.Forms.TextBox();
            this.btnTimer = new System.Windows.Forms.Button();
            this.label1 = new System.Windows.Forms.Label();
            this.btnJWSet = new System.Windows.Forms.Button();
            this.btnYLSSet = new System.Windows.Forms.Button();
            this.txt2VolLow = new System.Windows.Forms.TextBox();
            this.txt2VolHigh = new System.Windows.Forms.TextBox();
            this.txt2CurHigh = new System.Windows.Forms.TextBox();
            this.txt3VolLow = new System.Windows.Forms.TextBox();
            this.txt3VolHigh = new System.Windows.Forms.TextBox();
            this.txt2CurLow = new System.Windows.Forms.TextBox();
            this.txt3CurLow = new System.Windows.Forms.TextBox();
            this.txt3CurHigh = new System.Windows.Forms.TextBox();
            this.groupBox5 = new System.Windows.Forms.GroupBox();
            this.label17 = new System.Windows.Forms.Label();
            this.label18 = new System.Windows.Forms.Label();
            this.label19 = new System.Windows.Forms.Label();
            this.label21 = new System.Windows.Forms.Label();
            this.groupBox7 = new System.Windows.Forms.GroupBox();
            this.btnZDSet = new System.Windows.Forms.Button();
            this.txt4VolLow = new System.Windows.Forms.TextBox();
            this.txt4VolHigh = new System.Windows.Forms.TextBox();
            this.txt4CurLow = new System.Windows.Forms.TextBox();
            this.txt4CurHigh = new System.Windows.Forms.TextBox();
            this.label26 = new System.Windows.Forms.Label();
            this.label27 = new System.Windows.Forms.Label();
            this.label28 = new System.Windows.Forms.Label();
            this.label29 = new System.Windows.Forms.Label();
            this.label24 = new System.Windows.Forms.Label();
            this.label33 = new System.Windows.Forms.Label();
            this.groupBox6 = new System.Windows.Forms.GroupBox();
            this.label22 = new System.Windows.Forms.Label();
            this.label23 = new System.Windows.Forms.Label();
            this.label25 = new System.Windows.Forms.Label();
            this.btnRJWSet = new System.Windows.Forms.Button();
            this.txt1VolHigh = new System.Windows.Forms.TextBox();
            this.button1 = new System.Windows.Forms.Button();
            this.tableLayoutPanel1 = new System.Windows.Forms.TableLayoutPanel();
            this.button2 = new System.Windows.Forms.Button();
            this.button3 = new System.Windows.Forms.Button();
            this.button4 = new System.Windows.Forms.Button();
            this.txt1VolLow = new System.Windows.Forms.TextBox();
            this.txt1CurLow = new System.Windows.Forms.TextBox();
            this.txt1CurHigh = new System.Windows.Forms.TextBox();
            this.groupBox10 = new System.Windows.Forms.GroupBox();
            this.label16 = new System.Windows.Forms.Label();
            this.timer1 = new System.Windows.Forms.Timer(this.components);
            this.label20 = new System.Windows.Forms.Label();
            this.groupBox4 = new System.Windows.Forms.GroupBox();
            this.label15 = new System.Windows.Forms.Label();
            this.label14 = new System.Windows.Forms.Label();
            this.label32 = new System.Windows.Forms.Label();
            this.tbxTemp = new System.Windows.Forms.TextBox();
            this.btnTemp = new System.Windows.Forms.Button();
            this.tbxCDOM = new System.Windows.Forms.TextBox();
            this.label12 = new System.Windows.Forms.Label();
            this.label31 = new System.Windows.Forms.Label();
            this.label13 = new System.Windows.Forms.Label();
            this.btnCDOM = new System.Windows.Forms.Button();
            this.groupBox3 = new System.Windows.Forms.GroupBox();
            this.groupBox9 = new System.Windows.Forms.GroupBox();
            this.btnTempSet = new System.Windows.Forms.Button();
            this.tbxLeak2 = new System.Windows.Forms.TextBox();
            this.tbxLeak1 = new System.Windows.Forms.TextBox();
            this.tbxTemp2 = new System.Windows.Forms.TextBox();
            this.tbxTemp1 = new System.Windows.Forms.TextBox();
            this.label34 = new System.Windows.Forms.Label();
            this.label35 = new System.Windows.Forms.Label();
            this.label36 = new System.Windows.Forms.Label();
            this.label37 = new System.Windows.Forms.Label();
            this.groupBox8 = new System.Windows.Forms.GroupBox();
            this.btnCDOMSet = new System.Windows.Forms.Button();
            this.txt5VolLow = new System.Windows.Forms.TextBox();
            this.txt5VolHigh = new System.Windows.Forms.TextBox();
            this.txt5CurLow = new System.Windows.Forms.TextBox();
            this.txt5CurHigh = new System.Windows.Forms.TextBox();
            this.label30 = new System.Windows.Forms.Label();
            this.tbxZD = new System.Windows.Forms.TextBox();
            this.label11 = new System.Windows.Forms.Label();
            this.btnTur = new System.Windows.Forms.Button();
            this.label10 = new System.Windows.Forms.Label();
            this.tbxYLS = new System.Windows.Forms.TextBox();
            this.groupBox2 = new System.Windows.Forms.GroupBox();
            this.btnGreen = new System.Windows.Forms.Button();
            this.tbxJW = new System.Windows.Forms.TextBox();
            this.label9 = new System.Windows.Forms.Label();
            this.btnJW = new System.Windows.Forms.Button();
            this.tbxRJY = new System.Windows.Forms.TextBox();
            this.label8 = new System.Windows.Forms.Label();
            this.btnDO = new System.Windows.Forms.Button();
            this.pnlcmd = new System.Windows.Forms.Panel();
            this.groupBox1.SuspendLayout();
            this.groupBox5.SuspendLayout();
            this.groupBox7.SuspendLayout();
            this.groupBox6.SuspendLayout();
            this.tableLayoutPanel1.SuspendLayout();
            this.groupBox10.SuspendLayout();
            this.groupBox4.SuspendLayout();
            this.groupBox3.SuspendLayout();
            this.groupBox9.SuspendLayout();
            this.groupBox8.SuspendLayout();
            this.groupBox2.SuspendLayout();
            this.pnlcmd.SuspendLayout();
            this.SuspendLayout();
            // 
            // groupBox1
            // 
            this.groupBox1.Controls.Add(this.tbxTime);
            this.groupBox1.Controls.Add(this.btnTimer);
            this.groupBox1.Controls.Add(this.label1);
            this.groupBox1.Font = new System.Drawing.Font("Times New Roman", 10.5F);
            this.groupBox1.ForeColor = System.Drawing.Color.Maroon;
            this.groupBox1.Location = new System.Drawing.Point(3, 3);
            this.groupBox1.Name = "groupBox1";
            this.groupBox1.Size = new System.Drawing.Size(600, 53);
            this.groupBox1.TabIndex = 0;
            this.groupBox1.TabStop = false;
            this.groupBox1.Text = "1.校准时钟";
            // 
            // tbxTime
            // 
            this.tbxTime.BackColor = System.Drawing.SystemColors.Control;
            this.tbxTime.Location = new System.Drawing.Point(214, 23);
            this.tbxTime.Name = "tbxTime";
            this.tbxTime.ReadOnly = true;
            this.tbxTime.Size = new System.Drawing.Size(191, 24);
            this.tbxTime.TabIndex = 15;
            this.tbxTime.TextAlign = System.Windows.Forms.HorizontalAlignment.Center;
            // 
            // btnTimer
            // 
            this.btnTimer.BackColor = System.Drawing.SystemColors.Control;
            this.btnTimer.FlatStyle = System.Windows.Forms.FlatStyle.Flat;
            this.btnTimer.ForeColor = System.Drawing.Color.FromArgb(((int)(((byte)(0)))), ((int)(((byte)(192)))), ((int)(((byte)(192)))));
            this.btnTimer.Location = new System.Drawing.Point(513, 21);
            this.btnTimer.Name = "btnTimer";
            this.btnTimer.Size = new System.Drawing.Size(75, 25);
            this.btnTimer.TabIndex = 14;
            this.btnTimer.Text = "执行";
            this.btnTimer.UseVisualStyleBackColor = false;
            this.btnTimer.Click += new System.EventHandler(this.btnTimer_Click);
            // 
            // label1
            // 
            this.label1.AutoSize = true;
            this.label1.Font = new System.Drawing.Font("宋体", 9F, System.Drawing.FontStyle.Bold, System.Drawing.GraphicsUnit.Point, ((byte)(134)));
            this.label1.ForeColor = System.Drawing.Color.Black;
            this.label1.Location = new System.Drawing.Point(101, 26);
            this.label1.Name = "label1";
            this.label1.Size = new System.Drawing.Size(96, 12);
            this.label1.TabIndex = 0;
            this.label1.Text = "系统当前时钟：";
            // 
            // btnJWSet
            // 
            this.btnJWSet.BackColor = System.Drawing.SystemColors.Control;
            this.btnJWSet.FlatStyle = System.Windows.Forms.FlatStyle.Flat;
            this.btnJWSet.ForeColor = System.Drawing.Color.FromArgb(((int)(((byte)(0)))), ((int)(((byte)(192)))), ((int)(((byte)(192)))));
            this.btnJWSet.Location = new System.Drawing.Point(504, 20);
            this.btnJWSet.Name = "btnJWSet";
            this.btnJWSet.Size = new System.Drawing.Size(75, 25);
            this.btnJWSet.TabIndex = 14;
            this.btnJWSet.Text = "执行";
            this.btnJWSet.UseVisualStyleBackColor = false;
            this.btnJWSet.Click += new System.EventHandler(this.btnJWSet_Click);
            // 
            // btnYLSSet
            // 
            this.btnYLSSet.BackColor = System.Drawing.SystemColors.Control;
            this.btnYLSSet.FlatStyle = System.Windows.Forms.FlatStyle.Flat;
            this.btnYLSSet.ForeColor = System.Drawing.Color.FromArgb(((int)(((byte)(0)))), ((int)(((byte)(192)))), ((int)(((byte)(192)))));
            this.btnYLSSet.Location = new System.Drawing.Point(504, 20);
            this.btnYLSSet.Name = "btnYLSSet";
            this.btnYLSSet.Size = new System.Drawing.Size(75, 25);
            this.btnYLSSet.TabIndex = 14;
            this.btnYLSSet.Text = "执行";
            this.btnYLSSet.UseVisualStyleBackColor = false;
            this.btnYLSSet.Click += new System.EventHandler(this.btnYLSSet_Click);
            // 
            // txt2VolLow
            // 
            this.txt2VolLow.BackColor = System.Drawing.SystemColors.Control;
            this.txt2VolLow.Font = new System.Drawing.Font("Times New Roman", 9F);
            this.txt2VolLow.Location = new System.Drawing.Point(454, 23);
            this.txt2VolLow.Name = "txt2VolLow";
            this.txt2VolLow.Size = new System.Drawing.Size(44, 21);
            this.txt2VolLow.TabIndex = 16;
            this.txt2VolLow.Text = "23.000";
            // 
            // txt2VolHigh
            // 
            this.txt2VolHigh.BackColor = System.Drawing.SystemColors.Control;
            this.txt2VolHigh.Font = new System.Drawing.Font("Times New Roman", 9F);
            this.txt2VolHigh.Location = new System.Drawing.Point(333, 23);
            this.txt2VolHigh.Name = "txt2VolHigh";
            this.txt2VolHigh.Size = new System.Drawing.Size(44, 21);
            this.txt2VolHigh.TabIndex = 16;
            this.txt2VolHigh.Text = "26.000";
            // 
            // txt2CurHigh
            // 
            this.txt2CurHigh.BackColor = System.Drawing.SystemColors.Control;
            this.txt2CurHigh.Font = new System.Drawing.Font("Times New Roman", 9F);
            this.txt2CurHigh.Location = new System.Drawing.Point(84, 23);
            this.txt2CurHigh.Name = "txt2CurHigh";
            this.txt2CurHigh.Size = new System.Drawing.Size(44, 21);
            this.txt2CurHigh.TabIndex = 1;
            this.txt2CurHigh.Text = "01.000";
            // 
            // txt3VolLow
            // 
            this.txt3VolLow.BackColor = System.Drawing.SystemColors.Control;
            this.txt3VolLow.Font = new System.Drawing.Font("Times New Roman", 9F);
            this.txt3VolLow.Location = new System.Drawing.Point(454, 23);
            this.txt3VolLow.Name = "txt3VolLow";
            this.txt3VolLow.Size = new System.Drawing.Size(44, 21);
            this.txt3VolLow.TabIndex = 16;
            this.txt3VolLow.Text = "11.000";
            // 
            // txt3VolHigh
            // 
            this.txt3VolHigh.BackColor = System.Drawing.SystemColors.Control;
            this.txt3VolHigh.Font = new System.Drawing.Font("Times New Roman", 9F);
            this.txt3VolHigh.Location = new System.Drawing.Point(333, 23);
            this.txt3VolHigh.Name = "txt3VolHigh";
            this.txt3VolHigh.Size = new System.Drawing.Size(44, 21);
            this.txt3VolHigh.TabIndex = 16;
            this.txt3VolHigh.Text = "13.000";
            // 
            // txt2CurLow
            // 
            this.txt2CurLow.BackColor = System.Drawing.SystemColors.Control;
            this.txt2CurLow.Font = new System.Drawing.Font("Times New Roman", 9F);
            this.txt2CurLow.Location = new System.Drawing.Point(211, 23);
            this.txt2CurLow.Name = "txt2CurLow";
            this.txt2CurLow.Size = new System.Drawing.Size(44, 21);
            this.txt2CurLow.TabIndex = 10;
            this.txt2CurLow.Text = "00.000";
            // 
            // txt3CurLow
            // 
            this.txt3CurLow.BackColor = System.Drawing.SystemColors.Control;
            this.txt3CurLow.Font = new System.Drawing.Font("Times New Roman", 9F);
            this.txt3CurLow.Location = new System.Drawing.Point(211, 23);
            this.txt3CurLow.Name = "txt3CurLow";
            this.txt3CurLow.Size = new System.Drawing.Size(44, 21);
            this.txt3CurLow.TabIndex = 10;
            this.txt3CurLow.Text = "00.000";
            // 
            // txt3CurHigh
            // 
            this.txt3CurHigh.BackColor = System.Drawing.SystemColors.Control;
            this.txt3CurHigh.Font = new System.Drawing.Font("Times New Roman", 9F);
            this.txt3CurHigh.Location = new System.Drawing.Point(84, 23);
            this.txt3CurHigh.Name = "txt3CurHigh";
            this.txt3CurHigh.Size = new System.Drawing.Size(44, 21);
            this.txt3CurHigh.TabIndex = 1;
            this.txt3CurHigh.Text = "01.000";
            // 
            // groupBox5
            // 
            this.groupBox5.Controls.Add(this.btnJWSet);
            this.groupBox5.Controls.Add(this.txt2VolLow);
            this.groupBox5.Controls.Add(this.txt2VolHigh);
            this.groupBox5.Controls.Add(this.txt2CurLow);
            this.groupBox5.Controls.Add(this.txt2CurHigh);
            this.groupBox5.Controls.Add(this.label17);
            this.groupBox5.Controls.Add(this.label18);
            this.groupBox5.Controls.Add(this.label19);
            this.groupBox5.Controls.Add(this.label21);
            this.groupBox5.Font = new System.Drawing.Font("Times New Roman", 10.5F);
            this.groupBox5.ForeColor = System.Drawing.Color.FromArgb(((int)(((byte)(0)))), ((int)(((byte)(0)))), ((int)(((byte)(192)))));
            this.groupBox5.Location = new System.Drawing.Point(6, 81);
            this.groupBox5.Name = "groupBox5";
            this.groupBox5.Size = new System.Drawing.Size(585, 55);
            this.groupBox5.TabIndex = 17;
            this.groupBox5.TabStop = false;
            this.groupBox5.Text = "通道2";
            // 
            // label17
            // 
            this.label17.AutoSize = true;
            this.label17.Font = new System.Drawing.Font("宋体", 9F, System.Drawing.FontStyle.Bold, System.Drawing.GraphicsUnit.Point, ((byte)(134)));
            this.label17.ForeColor = System.Drawing.Color.Black;
            this.label17.Location = new System.Drawing.Point(381, 26);
            this.label17.Name = "label17";
            this.label17.Size = new System.Drawing.Size(83, 12);
            this.label17.TabIndex = 9;
            this.label17.Text = "电压值下限：";
            // 
            // label18
            // 
            this.label18.AutoSize = true;
            this.label18.Font = new System.Drawing.Font("宋体", 9F, System.Drawing.FontStyle.Bold, System.Drawing.GraphicsUnit.Point, ((byte)(134)));
            this.label18.ForeColor = System.Drawing.Color.Black;
            this.label18.Location = new System.Drawing.Point(261, 26);
            this.label18.Name = "label18";
            this.label18.Size = new System.Drawing.Size(83, 12);
            this.label18.TabIndex = 7;
            this.label18.Text = "电压值上限：";
            // 
            // label19
            // 
            this.label19.AutoSize = true;
            this.label19.Font = new System.Drawing.Font("宋体", 9F, System.Drawing.FontStyle.Bold, System.Drawing.GraphicsUnit.Point, ((byte)(134)));
            this.label19.ForeColor = System.Drawing.Color.Black;
            this.label19.Location = new System.Drawing.Point(137, 26);
            this.label19.Name = "label19";
            this.label19.Size = new System.Drawing.Size(83, 12);
            this.label19.TabIndex = 2;
            this.label19.Text = "电流值下限：";
            // 
            // label21
            // 
            this.label21.AutoSize = true;
            this.label21.Font = new System.Drawing.Font("宋体", 9F, System.Drawing.FontStyle.Bold, System.Drawing.GraphicsUnit.Point, ((byte)(134)));
            this.label21.ForeColor = System.Drawing.Color.Black;
            this.label21.Location = new System.Drawing.Point(6, 26);
            this.label21.Name = "label21";
            this.label21.Size = new System.Drawing.Size(83, 12);
            this.label21.TabIndex = 0;
            this.label21.Text = "电流值上限：";
            // 
            // groupBox7
            // 
            this.groupBox7.Controls.Add(this.btnZDSet);
            this.groupBox7.Controls.Add(this.txt4VolLow);
            this.groupBox7.Controls.Add(this.txt4VolHigh);
            this.groupBox7.Controls.Add(this.txt4CurLow);
            this.groupBox7.Controls.Add(this.txt4CurHigh);
            this.groupBox7.Controls.Add(this.label26);
            this.groupBox7.Controls.Add(this.label27);
            this.groupBox7.Controls.Add(this.label28);
            this.groupBox7.Controls.Add(this.label29);
            this.groupBox7.Font = new System.Drawing.Font("Times New Roman", 10.5F);
            this.groupBox7.ForeColor = System.Drawing.Color.FromArgb(((int)(((byte)(0)))), ((int)(((byte)(0)))), ((int)(((byte)(192)))));
            this.groupBox7.Location = new System.Drawing.Point(6, 203);
            this.groupBox7.Name = "groupBox7";
            this.groupBox7.Size = new System.Drawing.Size(585, 55);
            this.groupBox7.TabIndex = 19;
            this.groupBox7.TabStop = false;
            this.groupBox7.Text = "通道4";
            // 
            // btnZDSet
            // 
            this.btnZDSet.BackColor = System.Drawing.SystemColors.Control;
            this.btnZDSet.FlatStyle = System.Windows.Forms.FlatStyle.Flat;
            this.btnZDSet.ForeColor = System.Drawing.Color.FromArgb(((int)(((byte)(0)))), ((int)(((byte)(192)))), ((int)(((byte)(192)))));
            this.btnZDSet.Location = new System.Drawing.Point(504, 20);
            this.btnZDSet.Name = "btnZDSet";
            this.btnZDSet.Size = new System.Drawing.Size(75, 25);
            this.btnZDSet.TabIndex = 14;
            this.btnZDSet.Text = "执行";
            this.btnZDSet.UseVisualStyleBackColor = false;
            this.btnZDSet.Click += new System.EventHandler(this.btnZDSet_Click);
            // 
            // txt4VolLow
            // 
            this.txt4VolLow.BackColor = System.Drawing.SystemColors.Control;
            this.txt4VolLow.Font = new System.Drawing.Font("Times New Roman", 9F);
            this.txt4VolLow.Location = new System.Drawing.Point(454, 23);
            this.txt4VolLow.Name = "txt4VolLow";
            this.txt4VolLow.Size = new System.Drawing.Size(44, 21);
            this.txt4VolLow.TabIndex = 16;
            this.txt4VolLow.Text = "11.000";
            // 
            // txt4VolHigh
            // 
            this.txt4VolHigh.BackColor = System.Drawing.SystemColors.Control;
            this.txt4VolHigh.Font = new System.Drawing.Font("Times New Roman", 9F);
            this.txt4VolHigh.Location = new System.Drawing.Point(333, 23);
            this.txt4VolHigh.Name = "txt4VolHigh";
            this.txt4VolHigh.Size = new System.Drawing.Size(44, 21);
            this.txt4VolHigh.TabIndex = 16;
            this.txt4VolHigh.Text = "13.000";
            // 
            // txt4CurLow
            // 
            this.txt4CurLow.BackColor = System.Drawing.SystemColors.Control;
            this.txt4CurLow.Font = new System.Drawing.Font("Times New Roman", 9F);
            this.txt4CurLow.Location = new System.Drawing.Point(211, 23);
            this.txt4CurLow.Name = "txt4CurLow";
            this.txt4CurLow.Size = new System.Drawing.Size(44, 21);
            this.txt4CurLow.TabIndex = 10;
            this.txt4CurLow.Text = "00.000";
            // 
            // txt4CurHigh
            // 
            this.txt4CurHigh.BackColor = System.Drawing.SystemColors.Control;
            this.txt4CurHigh.Font = new System.Drawing.Font("Times New Roman", 9F);
            this.txt4CurHigh.Location = new System.Drawing.Point(84, 23);
            this.txt4CurHigh.Name = "txt4CurHigh";
            this.txt4CurHigh.Size = new System.Drawing.Size(44, 21);
            this.txt4CurHigh.TabIndex = 1;
            this.txt4CurHigh.Text = "01.000";
            // 
            // label26
            // 
            this.label26.AutoSize = true;
            this.label26.Font = new System.Drawing.Font("宋体", 9F, System.Drawing.FontStyle.Bold, System.Drawing.GraphicsUnit.Point, ((byte)(134)));
            this.label26.ForeColor = System.Drawing.Color.Black;
            this.label26.Location = new System.Drawing.Point(381, 26);
            this.label26.Name = "label26";
            this.label26.Size = new System.Drawing.Size(83, 12);
            this.label26.TabIndex = 9;
            this.label26.Text = "电压值下限：";
            // 
            // label27
            // 
            this.label27.AutoSize = true;
            this.label27.Font = new System.Drawing.Font("宋体", 9F, System.Drawing.FontStyle.Bold, System.Drawing.GraphicsUnit.Point, ((byte)(134)));
            this.label27.ForeColor = System.Drawing.Color.Black;
            this.label27.Location = new System.Drawing.Point(261, 26);
            this.label27.Name = "label27";
            this.label27.Size = new System.Drawing.Size(83, 12);
            this.label27.TabIndex = 7;
            this.label27.Text = "电压值上限：";
            // 
            // label28
            // 
            this.label28.AutoSize = true;
            this.label28.Font = new System.Drawing.Font("宋体", 9F, System.Drawing.FontStyle.Bold, System.Drawing.GraphicsUnit.Point, ((byte)(134)));
            this.label28.ForeColor = System.Drawing.Color.Black;
            this.label28.Location = new System.Drawing.Point(137, 26);
            this.label28.Name = "label28";
            this.label28.Size = new System.Drawing.Size(83, 12);
            this.label28.TabIndex = 2;
            this.label28.Text = "电流值下限：";
            // 
            // label29
            // 
            this.label29.AutoSize = true;
            this.label29.Font = new System.Drawing.Font("宋体", 9F, System.Drawing.FontStyle.Bold, System.Drawing.GraphicsUnit.Point, ((byte)(134)));
            this.label29.ForeColor = System.Drawing.Color.Black;
            this.label29.Location = new System.Drawing.Point(6, 26);
            this.label29.Name = "label29";
            this.label29.Size = new System.Drawing.Size(83, 12);
            this.label29.TabIndex = 0;
            this.label29.Text = "电流值上限：";
            // 
            // label24
            // 
            this.label24.AutoSize = true;
            this.label24.Font = new System.Drawing.Font("宋体", 9F, System.Drawing.FontStyle.Bold, System.Drawing.GraphicsUnit.Point, ((byte)(134)));
            this.label24.ForeColor = System.Drawing.Color.Black;
            this.label24.Location = new System.Drawing.Point(137, 26);
            this.label24.Name = "label24";
            this.label24.Size = new System.Drawing.Size(83, 12);
            this.label24.TabIndex = 2;
            this.label24.Text = "电流值下限：";
            // 
            // label33
            // 
            this.label33.AutoSize = true;
            this.label33.Font = new System.Drawing.Font("宋体", 9F, System.Drawing.FontStyle.Bold, System.Drawing.GraphicsUnit.Point, ((byte)(134)));
            this.label33.ForeColor = System.Drawing.Color.Black;
            this.label33.Location = new System.Drawing.Point(6, 26);
            this.label33.Name = "label33";
            this.label33.Size = new System.Drawing.Size(83, 12);
            this.label33.TabIndex = 0;
            this.label33.Text = "电流值上限：";
            // 
            // groupBox6
            // 
            this.groupBox6.Controls.Add(this.btnYLSSet);
            this.groupBox6.Controls.Add(this.txt3VolLow);
            this.groupBox6.Controls.Add(this.txt3VolHigh);
            this.groupBox6.Controls.Add(this.txt3CurLow);
            this.groupBox6.Controls.Add(this.txt3CurHigh);
            this.groupBox6.Controls.Add(this.label22);
            this.groupBox6.Controls.Add(this.label23);
            this.groupBox6.Controls.Add(this.label24);
            this.groupBox6.Controls.Add(this.label25);
            this.groupBox6.Font = new System.Drawing.Font("Times New Roman", 10.5F);
            this.groupBox6.ForeColor = System.Drawing.Color.FromArgb(((int)(((byte)(0)))), ((int)(((byte)(0)))), ((int)(((byte)(192)))));
            this.groupBox6.Location = new System.Drawing.Point(6, 142);
            this.groupBox6.Name = "groupBox6";
            this.groupBox6.Size = new System.Drawing.Size(585, 55);
            this.groupBox6.TabIndex = 18;
            this.groupBox6.TabStop = false;
            this.groupBox6.Text = "通道3";
            // 
            // label22
            // 
            this.label22.AutoSize = true;
            this.label22.Font = new System.Drawing.Font("宋体", 9F, System.Drawing.FontStyle.Bold, System.Drawing.GraphicsUnit.Point, ((byte)(134)));
            this.label22.ForeColor = System.Drawing.Color.Black;
            this.label22.Location = new System.Drawing.Point(381, 26);
            this.label22.Name = "label22";
            this.label22.Size = new System.Drawing.Size(83, 12);
            this.label22.TabIndex = 9;
            this.label22.Text = "电压值下限：";
            // 
            // label23
            // 
            this.label23.AutoSize = true;
            this.label23.Font = new System.Drawing.Font("宋体", 9F, System.Drawing.FontStyle.Bold, System.Drawing.GraphicsUnit.Point, ((byte)(134)));
            this.label23.ForeColor = System.Drawing.Color.Black;
            this.label23.Location = new System.Drawing.Point(261, 26);
            this.label23.Name = "label23";
            this.label23.Size = new System.Drawing.Size(83, 12);
            this.label23.TabIndex = 7;
            this.label23.Text = "电压值上限：";
            // 
            // label25
            // 
            this.label25.AutoSize = true;
            this.label25.Font = new System.Drawing.Font("宋体", 9F, System.Drawing.FontStyle.Bold, System.Drawing.GraphicsUnit.Point, ((byte)(134)));
            this.label25.ForeColor = System.Drawing.Color.Black;
            this.label25.Location = new System.Drawing.Point(6, 26);
            this.label25.Name = "label25";
            this.label25.Size = new System.Drawing.Size(83, 12);
            this.label25.TabIndex = 0;
            this.label25.Text = "电流值上限：";
            // 
            // btnRJWSet
            // 
            this.btnRJWSet.BackColor = System.Drawing.SystemColors.Control;
            this.btnRJWSet.FlatStyle = System.Windows.Forms.FlatStyle.Flat;
            this.btnRJWSet.ForeColor = System.Drawing.Color.FromArgb(((int)(((byte)(0)))), ((int)(((byte)(192)))), ((int)(((byte)(192)))));
            this.btnRJWSet.Location = new System.Drawing.Point(504, 20);
            this.btnRJWSet.Name = "btnRJWSet";
            this.btnRJWSet.Size = new System.Drawing.Size(75, 25);
            this.btnRJWSet.TabIndex = 14;
            this.btnRJWSet.Text = "执行";
            this.btnRJWSet.UseVisualStyleBackColor = false;
            this.btnRJWSet.Click += new System.EventHandler(this.btnRJWSet_Click);
            // 
            // txt1VolHigh
            // 
            this.txt1VolHigh.BackColor = System.Drawing.SystemColors.Control;
            this.txt1VolHigh.Font = new System.Drawing.Font("Times New Roman", 9F);
            this.txt1VolHigh.Location = new System.Drawing.Point(333, 23);
            this.txt1VolHigh.Name = "txt1VolHigh";
            this.txt1VolHigh.Size = new System.Drawing.Size(44, 21);
            this.txt1VolHigh.TabIndex = 16;
            this.txt1VolHigh.Text = "13.000";
            // 
            // button1
            // 
            this.button1.BackColor = System.Drawing.SystemColors.Control;
            this.button1.FlatStyle = System.Windows.Forms.FlatStyle.Flat;
            this.button1.ForeColor = System.Drawing.Color.FromArgb(((int)(((byte)(0)))), ((int)(((byte)(192)))), ((int)(((byte)(192)))));
            this.button1.Location = new System.Drawing.Point(3, 3);
            this.button1.Name = "button1";
            this.button1.Size = new System.Drawing.Size(140, 42);
            this.button1.TabIndex = 0;
            this.button1.Text = "溶解氧";
            this.button1.UseVisualStyleBackColor = false;
            this.button1.Click += new System.EventHandler(this.button1_Click);
            // 
            // tableLayoutPanel1
            // 
            this.tableLayoutPanel1.ColumnCount = 4;
            this.tableLayoutPanel1.ColumnStyles.Add(new System.Windows.Forms.ColumnStyle(System.Windows.Forms.SizeType.Percent, 25F));
            this.tableLayoutPanel1.ColumnStyles.Add(new System.Windows.Forms.ColumnStyle(System.Windows.Forms.SizeType.Percent, 25F));
            this.tableLayoutPanel1.ColumnStyles.Add(new System.Windows.Forms.ColumnStyle(System.Windows.Forms.SizeType.Percent, 25F));
            this.tableLayoutPanel1.ColumnStyles.Add(new System.Windows.Forms.ColumnStyle(System.Windows.Forms.SizeType.Percent, 25F));
            this.tableLayoutPanel1.Controls.Add(this.button1, 0, 0);
            this.tableLayoutPanel1.Controls.Add(this.button2, 1, 0);
            this.tableLayoutPanel1.Controls.Add(this.button3, 2, 0);
            this.tableLayoutPanel1.Controls.Add(this.button4, 3, 0);
            this.tableLayoutPanel1.Location = new System.Drawing.Point(6, 20);
            this.tableLayoutPanel1.Name = "tableLayoutPanel1";
            this.tableLayoutPanel1.RowCount = 1;
            this.tableLayoutPanel1.RowStyles.Add(new System.Windows.Forms.RowStyle(System.Windows.Forms.SizeType.Percent, 100F));
            this.tableLayoutPanel1.Size = new System.Drawing.Size(585, 48);
            this.tableLayoutPanel1.TabIndex = 1;
            // 
            // button2
            // 
            this.button2.BackColor = System.Drawing.SystemColors.Control;
            this.button2.FlatStyle = System.Windows.Forms.FlatStyle.Flat;
            this.button2.ForeColor = System.Drawing.Color.FromArgb(((int)(((byte)(0)))), ((int)(((byte)(192)))), ((int)(((byte)(192)))));
            this.button2.Location = new System.Drawing.Point(149, 3);
            this.button2.Name = "button2";
            this.button2.Size = new System.Drawing.Size(140, 42);
            this.button2.TabIndex = 1;
            this.button2.Text = "PH";
            this.button2.UseVisualStyleBackColor = false;
            this.button2.Click += new System.EventHandler(this.button2_Click);
            // 
            // button3
            // 
            this.button3.BackColor = System.Drawing.SystemColors.Control;
            this.button3.FlatStyle = System.Windows.Forms.FlatStyle.Flat;
            this.button3.ForeColor = System.Drawing.Color.FromArgb(((int)(((byte)(0)))), ((int)(((byte)(192)))), ((int)(((byte)(192)))));
            this.button3.Location = new System.Drawing.Point(295, 3);
            this.button3.Name = "button3";
            this.button3.Size = new System.Drawing.Size(140, 42);
            this.button3.TabIndex = 2;
            this.button3.Text = "CTD";
            this.button3.UseVisualStyleBackColor = false;
            this.button3.Click += new System.EventHandler(this.button3_Click);
            // 
            // button4
            // 
            this.button4.BackColor = System.Drawing.SystemColors.Control;
            this.button4.FlatStyle = System.Windows.Forms.FlatStyle.Flat;
            this.button4.ForeColor = System.Drawing.Color.FromArgb(((int)(((byte)(0)))), ((int)(((byte)(192)))), ((int)(((byte)(192)))));
            this.button4.Location = new System.Drawing.Point(441, 3);
            this.button4.Name = "button4";
            this.button4.Size = new System.Drawing.Size(141, 42);
            this.button4.TabIndex = 3;
            this.button4.Text = "叶绿素浊度";
            this.button4.UseVisualStyleBackColor = false;
            this.button4.Click += new System.EventHandler(this.button4_Click);
            // 
            // txt1VolLow
            // 
            this.txt1VolLow.BackColor = System.Drawing.SystemColors.Control;
            this.txt1VolLow.Font = new System.Drawing.Font("Times New Roman", 9F);
            this.txt1VolLow.Location = new System.Drawing.Point(454, 23);
            this.txt1VolLow.Name = "txt1VolLow";
            this.txt1VolLow.Size = new System.Drawing.Size(44, 21);
            this.txt1VolLow.TabIndex = 16;
            this.txt1VolLow.Text = "11.000";
            // 
            // txt1CurLow
            // 
            this.txt1CurLow.BackColor = System.Drawing.SystemColors.Control;
            this.txt1CurLow.Font = new System.Drawing.Font("Times New Roman", 9F);
            this.txt1CurLow.Location = new System.Drawing.Point(211, 23);
            this.txt1CurLow.Name = "txt1CurLow";
            this.txt1CurLow.Size = new System.Drawing.Size(44, 21);
            this.txt1CurLow.TabIndex = 10;
            this.txt1CurLow.Text = "00.000";
            // 
            // txt1CurHigh
            // 
            this.txt1CurHigh.BackColor = System.Drawing.SystemColors.Control;
            this.txt1CurHigh.Font = new System.Drawing.Font("Times New Roman", 9F);
            this.txt1CurHigh.Location = new System.Drawing.Point(84, 23);
            this.txt1CurHigh.Name = "txt1CurHigh";
            this.txt1CurHigh.Size = new System.Drawing.Size(44, 21);
            this.txt1CurHigh.TabIndex = 1;
            this.txt1CurHigh.Text = "01.000";
            // 
            // groupBox10
            // 
            this.groupBox10.Controls.Add(this.tableLayoutPanel1);
            this.groupBox10.Font = new System.Drawing.Font("Times New Roman", 10.5F);
            this.groupBox10.ForeColor = System.Drawing.Color.Maroon;
            this.groupBox10.Location = new System.Drawing.Point(3, 605);
            this.groupBox10.Name = "groupBox10";
            this.groupBox10.Size = new System.Drawing.Size(600, 76);
            this.groupBox10.TabIndex = 16;
            this.groupBox10.TabStop = false;
            this.groupBox10.Text = "4.传感器自身指令";
            // 
            // label16
            // 
            this.label16.AutoSize = true;
            this.label16.Font = new System.Drawing.Font("宋体", 9F, System.Drawing.FontStyle.Bold, System.Drawing.GraphicsUnit.Point, ((byte)(134)));
            this.label16.ForeColor = System.Drawing.Color.Black;
            this.label16.Location = new System.Drawing.Point(381, 26);
            this.label16.Name = "label16";
            this.label16.Size = new System.Drawing.Size(83, 12);
            this.label16.TabIndex = 9;
            this.label16.Text = "电压值下限：";
            // 
            // timer1
            // 
            this.timer1.Tick += new System.EventHandler(this.timer1_Tick);
            // 
            // label20
            // 
            this.label20.AutoSize = true;
            this.label20.Font = new System.Drawing.Font("宋体", 9F, System.Drawing.FontStyle.Bold, System.Drawing.GraphicsUnit.Point, ((byte)(134)));
            this.label20.ForeColor = System.Drawing.Color.Black;
            this.label20.Location = new System.Drawing.Point(6, 26);
            this.label20.Name = "label20";
            this.label20.Size = new System.Drawing.Size(83, 12);
            this.label20.TabIndex = 0;
            this.label20.Text = "电流值上限：";
            // 
            // groupBox4
            // 
            this.groupBox4.Controls.Add(this.btnRJWSet);
            this.groupBox4.Controls.Add(this.txt1VolLow);
            this.groupBox4.Controls.Add(this.txt1VolHigh);
            this.groupBox4.Controls.Add(this.txt1CurLow);
            this.groupBox4.Controls.Add(this.txt1CurHigh);
            this.groupBox4.Controls.Add(this.label16);
            this.groupBox4.Controls.Add(this.label15);
            this.groupBox4.Controls.Add(this.label14);
            this.groupBox4.Controls.Add(this.label20);
            this.groupBox4.Font = new System.Drawing.Font("Times New Roman", 10.5F);
            this.groupBox4.ForeColor = System.Drawing.Color.FromArgb(((int)(((byte)(0)))), ((int)(((byte)(0)))), ((int)(((byte)(192)))));
            this.groupBox4.Location = new System.Drawing.Point(6, 20);
            this.groupBox4.Name = "groupBox4";
            this.groupBox4.Size = new System.Drawing.Size(585, 55);
            this.groupBox4.TabIndex = 15;
            this.groupBox4.TabStop = false;
            this.groupBox4.Text = "通道1";
            // 
            // label15
            // 
            this.label15.AutoSize = true;
            this.label15.Font = new System.Drawing.Font("宋体", 9F, System.Drawing.FontStyle.Bold, System.Drawing.GraphicsUnit.Point, ((byte)(134)));
            this.label15.ForeColor = System.Drawing.Color.Black;
            this.label15.Location = new System.Drawing.Point(261, 26);
            this.label15.Name = "label15";
            this.label15.Size = new System.Drawing.Size(83, 12);
            this.label15.TabIndex = 7;
            this.label15.Text = "电压值上限：";
            // 
            // label14
            // 
            this.label14.AutoSize = true;
            this.label14.Font = new System.Drawing.Font("宋体", 9F, System.Drawing.FontStyle.Bold, System.Drawing.GraphicsUnit.Point, ((byte)(134)));
            this.label14.ForeColor = System.Drawing.Color.Black;
            this.label14.Location = new System.Drawing.Point(136, 26);
            this.label14.Name = "label14";
            this.label14.Size = new System.Drawing.Size(83, 12);
            this.label14.TabIndex = 2;
            this.label14.Text = "电流值下限：";
            // 
            // label32
            // 
            this.label32.AutoSize = true;
            this.label32.Font = new System.Drawing.Font("宋体", 9F, System.Drawing.FontStyle.Bold, System.Drawing.GraphicsUnit.Point, ((byte)(134)));
            this.label32.ForeColor = System.Drawing.Color.Black;
            this.label32.Location = new System.Drawing.Point(137, 26);
            this.label32.Name = "label32";
            this.label32.Size = new System.Drawing.Size(83, 12);
            this.label32.TabIndex = 2;
            this.label32.Text = "电流值下限：";
            // 
            // tbxTemp
            // 
            this.tbxTemp.BackColor = System.Drawing.SystemColors.Control;
            this.tbxTemp.Font = new System.Drawing.Font("Times New Roman", 9F);
            this.tbxTemp.Location = new System.Drawing.Point(121, 96);
            this.tbxTemp.Name = "tbxTemp";
            this.tbxTemp.Size = new System.Drawing.Size(77, 21);
            this.tbxTemp.TabIndex = 31;
            this.tbxTemp.Text = "0010";
            this.tbxTemp.TextAlign = System.Windows.Forms.HorizontalAlignment.Center;
            // 
            // btnTemp
            // 
            this.btnTemp.BackColor = System.Drawing.SystemColors.Control;
            this.btnTemp.FlatStyle = System.Windows.Forms.FlatStyle.Flat;
            this.btnTemp.ForeColor = System.Drawing.Color.FromArgb(((int)(((byte)(0)))), ((int)(((byte)(192)))), ((int)(((byte)(192)))));
            this.btnTemp.Location = new System.Drawing.Point(220, 94);
            this.btnTemp.Name = "btnTemp";
            this.btnTemp.Size = new System.Drawing.Size(75, 25);
            this.btnTemp.TabIndex = 29;
            this.btnTemp.Text = "执行";
            this.btnTemp.UseVisualStyleBackColor = false;
            this.btnTemp.Click += new System.EventHandler(this.btnTemp_Click);
            // 
            // tbxCDOM
            // 
            this.tbxCDOM.BackColor = System.Drawing.SystemColors.Control;
            this.tbxCDOM.Font = new System.Drawing.Font("Times New Roman", 9F);
            this.tbxCDOM.Location = new System.Drawing.Point(412, 94);
            this.tbxCDOM.Name = "tbxCDOM";
            this.tbxCDOM.ReadOnly = true;
            this.tbxCDOM.Size = new System.Drawing.Size(77, 21);
            this.tbxCDOM.TabIndex = 28;
            this.tbxCDOM.Text = "0005";
            this.tbxCDOM.TextAlign = System.Windows.Forms.HorizontalAlignment.Center;
            // 
            // label12
            // 
            this.label12.AutoSize = true;
            this.label12.Font = new System.Drawing.Font("Times New Roman", 9F, System.Drawing.FontStyle.Bold);
            this.label12.ForeColor = System.Drawing.Color.Black;
            this.label12.Location = new System.Drawing.Point(307, 97);
            this.label12.Name = "label12";
            this.label12.Size = new System.Drawing.Size(111, 15);
            this.label12.TabIndex = 27;
            this.label12.Text = "CDOM时间间隔：";
            // 
            // label31
            // 
            this.label31.AutoSize = true;
            this.label31.Font = new System.Drawing.Font("宋体", 9F, System.Drawing.FontStyle.Bold, System.Drawing.GraphicsUnit.Point, ((byte)(134)));
            this.label31.ForeColor = System.Drawing.Color.Black;
            this.label31.Location = new System.Drawing.Point(261, 26);
            this.label31.Name = "label31";
            this.label31.Size = new System.Drawing.Size(83, 12);
            this.label31.TabIndex = 7;
            this.label31.Text = "电压值上限：";
            // 
            // label13
            // 
            this.label13.AutoSize = true;
            this.label13.Font = new System.Drawing.Font("Times New Roman", 9F, System.Drawing.FontStyle.Bold);
            this.label13.ForeColor = System.Drawing.Color.Black;
            this.label13.Location = new System.Drawing.Point(9, 97);
            this.label13.Name = "label13";
            this.label13.Size = new System.Drawing.Size(102, 15);
            this.label13.TabIndex = 30;
            this.label13.Text = "AD板时间间隔：";
            // 
            // btnCDOM
            // 
            this.btnCDOM.BackColor = System.Drawing.SystemColors.Control;
            this.btnCDOM.Enabled = false;
            this.btnCDOM.FlatStyle = System.Windows.Forms.FlatStyle.Flat;
            this.btnCDOM.ForeColor = System.Drawing.Color.FromArgb(((int)(((byte)(0)))), ((int)(((byte)(192)))), ((int)(((byte)(192)))));
            this.btnCDOM.Location = new System.Drawing.Point(513, 94);
            this.btnCDOM.Name = "btnCDOM";
            this.btnCDOM.Size = new System.Drawing.Size(75, 25);
            this.btnCDOM.TabIndex = 26;
            this.btnCDOM.Text = "执行";
            this.btnCDOM.UseVisualStyleBackColor = false;
            // 
            // groupBox3
            // 
            this.groupBox3.Controls.Add(this.groupBox9);
            this.groupBox3.Controls.Add(this.groupBox8);
            this.groupBox3.Controls.Add(this.groupBox7);
            this.groupBox3.Controls.Add(this.groupBox6);
            this.groupBox3.Controls.Add(this.groupBox5);
            this.groupBox3.Controls.Add(this.groupBox4);
            this.groupBox3.Font = new System.Drawing.Font("Times New Roman", 10.5F);
            this.groupBox3.ForeColor = System.Drawing.Color.Maroon;
            this.groupBox3.Location = new System.Drawing.Point(3, 203);
            this.groupBox3.Name = "groupBox3";
            this.groupBox3.Size = new System.Drawing.Size(600, 396);
            this.groupBox3.TabIndex = 15;
            this.groupBox3.TabStop = false;
            this.groupBox3.Text = "3.电压电流报警阈值";
            // 
            // groupBox9
            // 
            this.groupBox9.Controls.Add(this.btnTempSet);
            this.groupBox9.Controls.Add(this.tbxLeak2);
            this.groupBox9.Controls.Add(this.tbxLeak1);
            this.groupBox9.Controls.Add(this.tbxTemp2);
            this.groupBox9.Controls.Add(this.tbxTemp1);
            this.groupBox9.Controls.Add(this.label34);
            this.groupBox9.Controls.Add(this.label35);
            this.groupBox9.Controls.Add(this.label36);
            this.groupBox9.Controls.Add(this.label37);
            this.groupBox9.ForeColor = System.Drawing.Color.FromArgb(((int)(((byte)(0)))), ((int)(((byte)(0)))), ((int)(((byte)(192)))));
            this.groupBox9.Location = new System.Drawing.Point(6, 325);
            this.groupBox9.Name = "groupBox9";
            this.groupBox9.Size = new System.Drawing.Size(585, 55);
            this.groupBox9.TabIndex = 21;
            this.groupBox9.TabStop = false;
            this.groupBox9.Text = "温度";
            // 
            // btnTempSet
            // 
            this.btnTempSet.BackColor = System.Drawing.SystemColors.Control;
            this.btnTempSet.FlatStyle = System.Windows.Forms.FlatStyle.Flat;
            this.btnTempSet.ForeColor = System.Drawing.Color.FromArgb(((int)(((byte)(0)))), ((int)(((byte)(192)))), ((int)(((byte)(192)))));
            this.btnTempSet.Location = new System.Drawing.Point(504, 20);
            this.btnTempSet.Name = "btnTempSet";
            this.btnTempSet.Size = new System.Drawing.Size(75, 25);
            this.btnTempSet.TabIndex = 14;
            this.btnTempSet.Text = "执行";
            this.btnTempSet.UseVisualStyleBackColor = false;
            this.btnTempSet.Click += new System.EventHandler(this.btnTempSet_Click);
            // 
            // tbxLeak2
            // 
            this.tbxLeak2.BackColor = System.Drawing.SystemColors.Control;
            this.tbxLeak2.Font = new System.Drawing.Font("Times New Roman", 9F);
            this.tbxLeak2.Location = new System.Drawing.Point(454, 23);
            this.tbxLeak2.Name = "tbxLeak2";
            this.tbxLeak2.Size = new System.Drawing.Size(44, 21);
            this.tbxLeak2.TabIndex = 16;
            this.tbxLeak2.Text = "00.000";
            this.tbxLeak2.Visible = false;
            // 
            // tbxLeak1
            // 
            this.tbxLeak1.BackColor = System.Drawing.SystemColors.Control;
            this.tbxLeak1.Font = new System.Drawing.Font("Times New Roman", 9F);
            this.tbxLeak1.Location = new System.Drawing.Point(333, 23);
            this.tbxLeak1.Name = "tbxLeak1";
            this.tbxLeak1.Size = new System.Drawing.Size(44, 21);
            this.tbxLeak1.TabIndex = 16;
            this.tbxLeak1.Text = "95.000";
            this.tbxLeak1.Visible = false;
            // 
            // tbxTemp2
            // 
            this.tbxTemp2.BackColor = System.Drawing.SystemColors.Control;
            this.tbxTemp2.Font = new System.Drawing.Font("Times New Roman", 9F);
            this.tbxTemp2.Location = new System.Drawing.Point(211, 23);
            this.tbxTemp2.Name = "tbxTemp2";
            this.tbxTemp2.Size = new System.Drawing.Size(44, 21);
            this.tbxTemp2.TabIndex = 10;
            this.tbxTemp2.Text = "05.000";
            // 
            // tbxTemp1
            // 
            this.tbxTemp1.BackColor = System.Drawing.SystemColors.Control;
            this.tbxTemp1.Font = new System.Drawing.Font("Times New Roman", 9F);
            this.tbxTemp1.Location = new System.Drawing.Point(84, 23);
            this.tbxTemp1.Name = "tbxTemp1";
            this.tbxTemp1.Size = new System.Drawing.Size(44, 21);
            this.tbxTemp1.TabIndex = 1;
            this.tbxTemp1.Text = "70.000";
            // 
            // label34
            // 
            this.label34.AutoSize = true;
            this.label34.Font = new System.Drawing.Font("宋体", 9F, System.Drawing.FontStyle.Bold, System.Drawing.GraphicsUnit.Point, ((byte)(134)));
            this.label34.ForeColor = System.Drawing.Color.Black;
            this.label34.Location = new System.Drawing.Point(381, 26);
            this.label34.Name = "label34";
            this.label34.Size = new System.Drawing.Size(83, 12);
            this.label34.TabIndex = 9;
            this.label34.Text = "漏水值下限：";
            this.label34.Visible = false;
            // 
            // label35
            // 
            this.label35.AutoSize = true;
            this.label35.Font = new System.Drawing.Font("宋体", 9F, System.Drawing.FontStyle.Bold, System.Drawing.GraphicsUnit.Point, ((byte)(134)));
            this.label35.ForeColor = System.Drawing.Color.Black;
            this.label35.Location = new System.Drawing.Point(261, 26);
            this.label35.Name = "label35";
            this.label35.Size = new System.Drawing.Size(83, 12);
            this.label35.TabIndex = 7;
            this.label35.Text = "漏水值上限：";
            this.label35.Visible = false;
            // 
            // label36
            // 
            this.label36.AutoSize = true;
            this.label36.Font = new System.Drawing.Font("宋体", 9F, System.Drawing.FontStyle.Bold, System.Drawing.GraphicsUnit.Point, ((byte)(134)));
            this.label36.ForeColor = System.Drawing.Color.Black;
            this.label36.Location = new System.Drawing.Point(137, 26);
            this.label36.Name = "label36";
            this.label36.Size = new System.Drawing.Size(83, 12);
            this.label36.TabIndex = 2;
            this.label36.Text = "温度值下限：";
            // 
            // label37
            // 
            this.label37.AutoSize = true;
            this.label37.Font = new System.Drawing.Font("宋体", 9F, System.Drawing.FontStyle.Bold, System.Drawing.GraphicsUnit.Point, ((byte)(134)));
            this.label37.ForeColor = System.Drawing.Color.Black;
            this.label37.Location = new System.Drawing.Point(6, 26);
            this.label37.Name = "label37";
            this.label37.Size = new System.Drawing.Size(83, 12);
            this.label37.TabIndex = 0;
            this.label37.Text = "温度值上限：";
            // 
            // groupBox8
            // 
            this.groupBox8.Controls.Add(this.btnCDOMSet);
            this.groupBox8.Controls.Add(this.txt5VolLow);
            this.groupBox8.Controls.Add(this.txt5VolHigh);
            this.groupBox8.Controls.Add(this.txt5CurLow);
            this.groupBox8.Controls.Add(this.txt5CurHigh);
            this.groupBox8.Controls.Add(this.label30);
            this.groupBox8.Controls.Add(this.label31);
            this.groupBox8.Controls.Add(this.label32);
            this.groupBox8.Controls.Add(this.label33);
            this.groupBox8.Font = new System.Drawing.Font("Times New Roman", 10.5F);
            this.groupBox8.ForeColor = System.Drawing.Color.FromArgb(((int)(((byte)(0)))), ((int)(((byte)(0)))), ((int)(((byte)(192)))));
            this.groupBox8.Location = new System.Drawing.Point(6, 264);
            this.groupBox8.Name = "groupBox8";
            this.groupBox8.Size = new System.Drawing.Size(585, 55);
            this.groupBox8.TabIndex = 20;
            this.groupBox8.TabStop = false;
            this.groupBox8.Text = "通道5";
            // 
            // btnCDOMSet
            // 
            this.btnCDOMSet.BackColor = System.Drawing.SystemColors.Control;
            this.btnCDOMSet.FlatStyle = System.Windows.Forms.FlatStyle.Flat;
            this.btnCDOMSet.ForeColor = System.Drawing.Color.FromArgb(((int)(((byte)(0)))), ((int)(((byte)(192)))), ((int)(((byte)(192)))));
            this.btnCDOMSet.Location = new System.Drawing.Point(504, 20);
            this.btnCDOMSet.Name = "btnCDOMSet";
            this.btnCDOMSet.Size = new System.Drawing.Size(75, 25);
            this.btnCDOMSet.TabIndex = 14;
            this.btnCDOMSet.Text = "执行";
            this.btnCDOMSet.UseVisualStyleBackColor = false;
            this.btnCDOMSet.Click += new System.EventHandler(this.btnCDOMSet_Click);
            // 
            // txt5VolLow
            // 
            this.txt5VolLow.BackColor = System.Drawing.SystemColors.Control;
            this.txt5VolLow.Font = new System.Drawing.Font("Times New Roman", 9F);
            this.txt5VolLow.Location = new System.Drawing.Point(454, 23);
            this.txt5VolLow.Name = "txt5VolLow";
            this.txt5VolLow.Size = new System.Drawing.Size(44, 21);
            this.txt5VolLow.TabIndex = 16;
            this.txt5VolLow.Text = "11.000";
            // 
            // txt5VolHigh
            // 
            this.txt5VolHigh.BackColor = System.Drawing.SystemColors.Control;
            this.txt5VolHigh.Font = new System.Drawing.Font("Times New Roman", 9F);
            this.txt5VolHigh.Location = new System.Drawing.Point(333, 23);
            this.txt5VolHigh.Name = "txt5VolHigh";
            this.txt5VolHigh.Size = new System.Drawing.Size(44, 21);
            this.txt5VolHigh.TabIndex = 16;
            this.txt5VolHigh.Text = "13.000";
            // 
            // txt5CurLow
            // 
            this.txt5CurLow.BackColor = System.Drawing.SystemColors.Control;
            this.txt5CurLow.Font = new System.Drawing.Font("Times New Roman", 9F);
            this.txt5CurLow.Location = new System.Drawing.Point(211, 23);
            this.txt5CurLow.Name = "txt5CurLow";
            this.txt5CurLow.Size = new System.Drawing.Size(44, 21);
            this.txt5CurLow.TabIndex = 10;
            this.txt5CurLow.Text = "00.000";
            // 
            // txt5CurHigh
            // 
            this.txt5CurHigh.BackColor = System.Drawing.SystemColors.Control;
            this.txt5CurHigh.Font = new System.Drawing.Font("Times New Roman", 9F);
            this.txt5CurHigh.Location = new System.Drawing.Point(84, 23);
            this.txt5CurHigh.Name = "txt5CurHigh";
            this.txt5CurHigh.Size = new System.Drawing.Size(44, 21);
            this.txt5CurHigh.TabIndex = 1;
            this.txt5CurHigh.Text = "01.000";
            // 
            // label30
            // 
            this.label30.AutoSize = true;
            this.label30.Font = new System.Drawing.Font("宋体", 9F, System.Drawing.FontStyle.Bold, System.Drawing.GraphicsUnit.Point, ((byte)(134)));
            this.label30.ForeColor = System.Drawing.Color.Black;
            this.label30.Location = new System.Drawing.Point(381, 26);
            this.label30.Name = "label30";
            this.label30.Size = new System.Drawing.Size(83, 12);
            this.label30.TabIndex = 9;
            this.label30.Text = "电压值下限：";
            // 
            // tbxZD
            // 
            this.tbxZD.BackColor = System.Drawing.SystemColors.Control;
            this.tbxZD.Font = new System.Drawing.Font("Times New Roman", 9F);
            this.tbxZD.Location = new System.Drawing.Point(412, 61);
            this.tbxZD.Name = "tbxZD";
            this.tbxZD.ReadOnly = true;
            this.tbxZD.Size = new System.Drawing.Size(77, 21);
            this.tbxZD.TabIndex = 25;
            this.tbxZD.Text = "0005";
            this.tbxZD.TextAlign = System.Windows.Forms.HorizontalAlignment.Center;
            // 
            // label11
            // 
            this.label11.AutoSize = true;
            this.label11.Font = new System.Drawing.Font("宋体", 9F, System.Drawing.FontStyle.Bold, System.Drawing.GraphicsUnit.Point, ((byte)(134)));
            this.label11.ForeColor = System.Drawing.Color.Black;
            this.label11.Location = new System.Drawing.Point(307, 64);
            this.label11.Name = "label11";
            this.label11.Size = new System.Drawing.Size(96, 12);
            this.label11.TabIndex = 24;
            this.label11.Text = "浊度时间间隔：";
            // 
            // btnTur
            // 
            this.btnTur.BackColor = System.Drawing.SystemColors.Control;
            this.btnTur.Enabled = false;
            this.btnTur.FlatStyle = System.Windows.Forms.FlatStyle.Flat;
            this.btnTur.ForeColor = System.Drawing.Color.FromArgb(((int)(((byte)(0)))), ((int)(((byte)(192)))), ((int)(((byte)(192)))));
            this.btnTur.Location = new System.Drawing.Point(513, 62);
            this.btnTur.Name = "btnTur";
            this.btnTur.Size = new System.Drawing.Size(75, 25);
            this.btnTur.TabIndex = 23;
            this.btnTur.Text = "执行";
            this.btnTur.UseVisualStyleBackColor = false;
            // 
            // label10
            // 
            this.label10.AutoSize = true;
            this.label10.Font = new System.Drawing.Font("Times New Roman", 9F, System.Drawing.FontStyle.Bold);
            this.label10.ForeColor = System.Drawing.Color.Black;
            this.label10.Location = new System.Drawing.Point(9, 66);
            this.label10.Name = "label10";
            this.label10.Size = new System.Drawing.Size(98, 15);
            this.label10.TabIndex = 21;
            this.label10.Text = "CTD时间间隔：";
            // 
            // tbxYLS
            // 
            this.tbxYLS.BackColor = System.Drawing.SystemColors.Control;
            this.tbxYLS.Font = new System.Drawing.Font("Times New Roman", 9F);
            this.tbxYLS.Location = new System.Drawing.Point(121, 62);
            this.tbxYLS.Name = "tbxYLS";
            this.tbxYLS.ReadOnly = true;
            this.tbxYLS.Size = new System.Drawing.Size(77, 21);
            this.tbxYLS.TabIndex = 22;
            this.tbxYLS.Text = "0005";
            this.tbxYLS.TextAlign = System.Windows.Forms.HorizontalAlignment.Center;
            // 
            // groupBox2
            // 
            this.groupBox2.Controls.Add(this.tbxTemp);
            this.groupBox2.Controls.Add(this.btnTemp);
            this.groupBox2.Controls.Add(this.tbxCDOM);
            this.groupBox2.Controls.Add(this.label12);
            this.groupBox2.Controls.Add(this.label13);
            this.groupBox2.Controls.Add(this.btnCDOM);
            this.groupBox2.Controls.Add(this.tbxZD);
            this.groupBox2.Controls.Add(this.label11);
            this.groupBox2.Controls.Add(this.btnTur);
            this.groupBox2.Controls.Add(this.tbxYLS);
            this.groupBox2.Controls.Add(this.label10);
            this.groupBox2.Controls.Add(this.btnGreen);
            this.groupBox2.Controls.Add(this.tbxJW);
            this.groupBox2.Controls.Add(this.label9);
            this.groupBox2.Controls.Add(this.btnJW);
            this.groupBox2.Controls.Add(this.tbxRJY);
            this.groupBox2.Controls.Add(this.label8);
            this.groupBox2.Controls.Add(this.btnDO);
            this.groupBox2.Font = new System.Drawing.Font("Times New Roman", 10.5F);
            this.groupBox2.ForeColor = System.Drawing.Color.Maroon;
            this.groupBox2.Location = new System.Drawing.Point(3, 62);
            this.groupBox2.Name = "groupBox2";
            this.groupBox2.Size = new System.Drawing.Size(600, 135);
            this.groupBox2.TabIndex = 15;
            this.groupBox2.TabStop = false;
            this.groupBox2.Text = "2.设置数据发送时间间隔";
            // 
            // btnGreen
            // 
            this.btnGreen.BackColor = System.Drawing.SystemColors.Control;
            this.btnGreen.Enabled = false;
            this.btnGreen.FlatStyle = System.Windows.Forms.FlatStyle.Flat;
            this.btnGreen.ForeColor = System.Drawing.Color.FromArgb(((int)(((byte)(0)))), ((int)(((byte)(192)))), ((int)(((byte)(192)))));
            this.btnGreen.Location = new System.Drawing.Point(220, 61);
            this.btnGreen.Name = "btnGreen";
            this.btnGreen.Size = new System.Drawing.Size(75, 25);
            this.btnGreen.TabIndex = 20;
            this.btnGreen.Text = "执行";
            this.btnGreen.UseVisualStyleBackColor = false;
            // 
            // tbxJW
            // 
            this.tbxJW.BackColor = System.Drawing.SystemColors.Control;
            this.tbxJW.Font = new System.Drawing.Font("Times New Roman", 9F);
            this.tbxJW.Location = new System.Drawing.Point(412, 27);
            this.tbxJW.Name = "tbxJW";
            this.tbxJW.ReadOnly = true;
            this.tbxJW.Size = new System.Drawing.Size(77, 21);
            this.tbxJW.TabIndex = 19;
            this.tbxJW.Text = "0005";
            this.tbxJW.TextAlign = System.Windows.Forms.HorizontalAlignment.Center;
            // 
            // label9
            // 
            this.label9.AutoSize = true;
            this.label9.Font = new System.Drawing.Font("宋体", 9F, System.Drawing.FontStyle.Bold, System.Drawing.GraphicsUnit.Point, ((byte)(134)));
            this.label9.ForeColor = System.Drawing.Color.Black;
            this.label9.Location = new System.Drawing.Point(307, 29);
            this.label9.Name = "label9";
            this.label9.Size = new System.Drawing.Size(109, 12);
            this.label9.TabIndex = 18;
            this.label9.Text = "安德拉时间间隔：";
            // 
            // btnJW
            // 
            this.btnJW.BackColor = System.Drawing.SystemColors.Control;
            this.btnJW.Enabled = false;
            this.btnJW.FlatStyle = System.Windows.Forms.FlatStyle.Flat;
            this.btnJW.ForeColor = System.Drawing.Color.FromArgb(((int)(((byte)(0)))), ((int)(((byte)(192)))), ((int)(((byte)(192)))));
            this.btnJW.Location = new System.Drawing.Point(513, 25);
            this.btnJW.Name = "btnJW";
            this.btnJW.Size = new System.Drawing.Size(75, 25);
            this.btnJW.TabIndex = 17;
            this.btnJW.Text = "执行";
            this.btnJW.UseVisualStyleBackColor = false;
            // 
            // tbxRJY
            // 
            this.tbxRJY.BackColor = System.Drawing.SystemColors.Control;
            this.tbxRJY.Font = new System.Drawing.Font("Times New Roman", 9F);
            this.tbxRJY.Location = new System.Drawing.Point(121, 26);
            this.tbxRJY.Name = "tbxRJY";
            this.tbxRJY.Size = new System.Drawing.Size(77, 21);
            this.tbxRJY.TabIndex = 16;
            this.tbxRJY.Text = "0010";
            this.tbxRJY.TextAlign = System.Windows.Forms.HorizontalAlignment.Center;
            // 
            // label8
            // 
            this.label8.AutoSize = true;
            this.label8.Font = new System.Drawing.Font("宋体", 9F, System.Drawing.FontStyle.Bold, System.Drawing.GraphicsUnit.Point, ((byte)(134)));
            this.label8.ForeColor = System.Drawing.SystemColors.ControlText;
            this.label8.Location = new System.Drawing.Point(9, 30);
            this.label8.Name = "label8";
            this.label8.Size = new System.Drawing.Size(109, 12);
            this.label8.TabIndex = 15;
            this.label8.Text = "溶解氧时间间隔：";
            // 
            // btnDO
            // 
            this.btnDO.BackColor = System.Drawing.SystemColors.Control;
            this.btnDO.FlatStyle = System.Windows.Forms.FlatStyle.Flat;
            this.btnDO.ForeColor = System.Drawing.Color.FromArgb(((int)(((byte)(0)))), ((int)(((byte)(192)))), ((int)(((byte)(192)))));
            this.btnDO.Location = new System.Drawing.Point(220, 25);
            this.btnDO.Name = "btnDO";
            this.btnDO.Size = new System.Drawing.Size(75, 25);
            this.btnDO.TabIndex = 14;
            this.btnDO.Text = "执行";
            this.btnDO.UseVisualStyleBackColor = false;
            this.btnDO.Click += new System.EventHandler(this.btnDO_Click);
            // 
            // pnlcmd
            // 
            this.pnlcmd.Controls.Add(this.groupBox10);
            this.pnlcmd.Controls.Add(this.groupBox1);
            this.pnlcmd.Controls.Add(this.groupBox3);
            this.pnlcmd.Controls.Add(this.groupBox2);
            this.pnlcmd.Dock = System.Windows.Forms.DockStyle.Fill;
            this.pnlcmd.Location = new System.Drawing.Point(0, 0);
            this.pnlcmd.Name = "pnlcmd";
            this.pnlcmd.Size = new System.Drawing.Size(608, 690);
            this.pnlcmd.TabIndex = 17;
            // 
            // cmdCollectSet
            // 
            this.AutoScaleDimensions = new System.Drawing.SizeF(6F, 12F);
            this.AutoScaleMode = System.Windows.Forms.AutoScaleMode.Font;
            this.BackColor = System.Drawing.SystemColors.Control;
            this.ClientSize = new System.Drawing.Size(608, 690);
            this.Controls.Add(this.pnlcmd);
            this.Name = "cmdCollectSet";
            this.StartPosition = System.Windows.Forms.FormStartPosition.CenterScreen;
            this.Text = "数据采集器1指令设置界面";
            this.Load += new System.EventHandler(this.cmdCollectSet_Load);
            this.groupBox1.ResumeLayout(false);
            this.groupBox1.PerformLayout();
            this.groupBox5.ResumeLayout(false);
            this.groupBox5.PerformLayout();
            this.groupBox7.ResumeLayout(false);
            this.groupBox7.PerformLayout();
            this.groupBox6.ResumeLayout(false);
            this.groupBox6.PerformLayout();
            this.tableLayoutPanel1.ResumeLayout(false);
            this.groupBox10.ResumeLayout(false);
            this.groupBox4.ResumeLayout(false);
            this.groupBox4.PerformLayout();
            this.groupBox3.ResumeLayout(false);
            this.groupBox9.ResumeLayout(false);
            this.groupBox9.PerformLayout();
            this.groupBox8.ResumeLayout(false);
            this.groupBox8.PerformLayout();
            this.groupBox2.ResumeLayout(false);
            this.groupBox2.PerformLayout();
            this.pnlcmd.ResumeLayout(false);
            this.ResumeLayout(false);

        }

        #endregion

        private System.Windows.Forms.GroupBox groupBox1;
        private System.Windows.Forms.TextBox tbxTime;
        private System.Windows.Forms.Button btnTimer;
        private System.Windows.Forms.Label label1;
        private System.Windows.Forms.Button btnJWSet;
        private System.Windows.Forms.Button btnYLSSet;
        private System.Windows.Forms.TextBox txt2VolLow;
        private System.Windows.Forms.TextBox txt2VolHigh;
        private System.Windows.Forms.TextBox txt2CurHigh;
        private System.Windows.Forms.TextBox txt3VolLow;
        private System.Windows.Forms.TextBox txt3VolHigh;
        private System.Windows.Forms.TextBox txt2CurLow;
        private System.Windows.Forms.TextBox txt3CurLow;
        private System.Windows.Forms.TextBox txt3CurHigh;
        private System.Windows.Forms.GroupBox groupBox5;
        private System.Windows.Forms.Label label17;
        private System.Windows.Forms.Label label18;
        private System.Windows.Forms.Label label19;
        private System.Windows.Forms.Label label21;
        private System.Windows.Forms.GroupBox groupBox7;
        private System.Windows.Forms.Button btnZDSet;
        private System.Windows.Forms.TextBox txt4VolLow;
        private System.Windows.Forms.TextBox txt4VolHigh;
        private System.Windows.Forms.TextBox txt4CurLow;
        private System.Windows.Forms.TextBox txt4CurHigh;
        private System.Windows.Forms.Label label26;
        private System.Windows.Forms.Label label27;
        private System.Windows.Forms.Label label28;
        private System.Windows.Forms.Label label29;
        private System.Windows.Forms.Label label24;
        private System.Windows.Forms.Label label33;
        private System.Windows.Forms.GroupBox groupBox6;
        private System.Windows.Forms.Label label22;
        private System.Windows.Forms.Label label23;
        private System.Windows.Forms.Label label25;
        private System.Windows.Forms.Button btnRJWSet;
        private System.Windows.Forms.TextBox txt1VolHigh;
        private System.Windows.Forms.Button button1;
        private System.Windows.Forms.TableLayoutPanel tableLayoutPanel1;
        private System.Windows.Forms.Button button2;
        private System.Windows.Forms.Button button3;
        private System.Windows.Forms.Button button4;
        private System.Windows.Forms.TextBox txt1VolLow;
        private System.Windows.Forms.TextBox txt1CurLow;
        private System.Windows.Forms.TextBox txt1CurHigh;
        private System.Windows.Forms.GroupBox groupBox10;
        private System.Windows.Forms.Label label16;
        private System.Windows.Forms.Timer timer1;
        private System.Windows.Forms.Label label20;
        private System.Windows.Forms.GroupBox groupBox4;
        private System.Windows.Forms.Label label15;
        private System.Windows.Forms.Label label14;
        private System.Windows.Forms.Label label32;
        private System.Windows.Forms.TextBox tbxTemp;
        private System.Windows.Forms.Button btnTemp;
        private System.Windows.Forms.TextBox tbxCDOM;
        private System.Windows.Forms.Label label12;
        private System.Windows.Forms.Label label31;
        private System.Windows.Forms.Label label13;
        private System.Windows.Forms.Button btnCDOM;
        private System.Windows.Forms.GroupBox groupBox3;
        private System.Windows.Forms.GroupBox groupBox9;
        private System.Windows.Forms.Button btnTempSet;
        private System.Windows.Forms.TextBox tbxLeak2;
        private System.Windows.Forms.TextBox tbxLeak1;
        private System.Windows.Forms.TextBox tbxTemp2;
        private System.Windows.Forms.TextBox tbxTemp1;
        private System.Windows.Forms.Label label34;
        private System.Windows.Forms.Label label35;
        private System.Windows.Forms.Label label36;
        private System.Windows.Forms.Label label37;
        private System.Windows.Forms.GroupBox groupBox8;
        private System.Windows.Forms.Button btnCDOMSet;
        private System.Windows.Forms.TextBox txt5VolLow;
        private System.Windows.Forms.TextBox txt5VolHigh;
        private System.Windows.Forms.TextBox txt5CurLow;
        private System.Windows.Forms.TextBox txt5CurHigh;
        private System.Windows.Forms.Label label30;
        private System.Windows.Forms.TextBox tbxZD;
        private System.Windows.Forms.Label label11;
        private System.Windows.Forms.Button btnTur;
        private System.Windows.Forms.Label label10;
        private System.Windows.Forms.TextBox tbxYLS;
        private System.Windows.Forms.GroupBox groupBox2;
        private System.Windows.Forms.Button btnGreen;
        private System.Windows.Forms.TextBox tbxJW;
        private System.Windows.Forms.Label label9;
        private System.Windows.Forms.Button btnJW;
        private System.Windows.Forms.TextBox tbxRJY;
        private System.Windows.Forms.Label label8;
        private System.Windows.Forms.Button btnDO;
        private System.Windows.Forms.Panel pnlcmd;
    }
}
