# Supplementary material
Source: MDPI journal article supplement (https://www.mdpi.com/2077-1312/10/8/1051)
Supplement: s1 [file s1 › OSNSystem/OSNSystem/OSNSystem/cmdSet.designer.cs]

namespace OSNSystem
{
    partial class cmdSet
    {
        /// <summary>
        /// Required designer variable.
        /// </summary>
        private System.ComponentModel.IContainer components = null;

        /// <summary>
        /// Clean up any resources being used.
        /// </summary>
        /// <param name="disposing">true if managed resources should be disposed; otherwise, false.</param>
        protected override void Dispose(bool disposing)
        {
            if (disposing && (components != null))
            {
                components.Dispose();
            }
            base.Dispose(disposing);
        }

        #region Windows Form Designer generated code

        /// <summary>
        /// Required method for Designer support - do not modify
        /// the contents of this method with the code editor.
        /// </summary>
        private void InitializeComponent()
        {
            this.components = new System.ComponentModel.Container();
            System.ComponentModel.ComponentResourceManager resources = new System.ComponentModel.ComponentResourceManager(typeof(cmdSet));
            this.timer1 = new System.Windows.Forms.Timer(this.components);
            this.pnlcmd = new System.Windows.Forms.Panel();
            this.tableLayoutPanel1 = new System.Windows.Forms.TableLayoutPanel();
            this.groupBox2 = new System.Windows.Forms.GroupBox();
            this.txtInterval = new System.Windows.Forms.TextBox();
            this.label8 = new System.Windows.Forms.Label();
            this.btnDO = new System.Windows.Forms.Button();
            this.groupBox3 = new System.Windows.Forms.GroupBox();
            this.groupBox8 = new System.Windows.Forms.GroupBox();
            this.btnSet5 = new System.Windows.Forms.Button();
            this.txt5AL = new System.Windows.Forms.TextBox();
            this.txt5AH = new System.Windows.Forms.TextBox();
            this.txt5VL = new System.Windows.Forms.TextBox();
            this.txt5VH = new System.Windows.Forms.TextBox();
            this.label12 = new System.Windows.Forms.Label();
            this.label13 = new System.Windows.Forms.Label();
            this.label22 = new System.Windows.Forms.Label();
            this.label23 = new System.Windows.Forms.Label();
            this.groupBox7 = new System.Windows.Forms.GroupBox();
            this.btnSet4 = new System.Windows.Forms.Button();
            this.txt4AL = new System.Windows.Forms.TextBox();
            this.txt4AH = new System.Windows.Forms.TextBox();
            this.txt4VL = new System.Windows.Forms.TextBox();
            this.txt4VH = new System.Windows.Forms.TextBox();
            this.label7 = new System.Windows.Forms.Label();
            this.label9 = new System.Windows.Forms.Label();
            this.label10 = new System.Windows.Forms.Label();
            this.label11 = new System.Windows.Forms.Label();
            this.groupBox6 = new System.Windows.Forms.GroupBox();
            this.btnSet3 = new System.Windows.Forms.Button();
            this.txt3AL = new System.Windows.Forms.TextBox();
            this.txt3AH = new System.Windows.Forms.TextBox();
            this.txt3VL = new System.Windows.Forms.TextBox();
            this.txt3VH = new System.Windows.Forms.TextBox();
            this.label3 = new System.Windows.Forms.Label();
            this.label4 = new System.Windows.Forms.Label();
            this.label5 = new System.Windows.Forms.Label();
            this.label6 = new System.Windows.Forms.Label();
            this.groupBox5 = new System.Windows.Forms.GroupBox();
            this.btnSet2 = new System.Windows.Forms.Button();
            this.txt2AL = new System.Windows.Forms.TextBox();
            this.txt2AH = new System.Windows.Forms.TextBox();
            this.txt2VL = new System.Windows.Forms.TextBox();
            this.txt2VH = new System.Windows.Forms.TextBox();
            this.label17 = new System.Windows.Forms.Label();
            this.label18 = new System.Windows.Forms.Label();
            this.label19 = new System.Windows.Forms.Label();
            this.label21 = new System.Windows.Forms.Label();
            this.groupBox4 = new System.Windows.Forms.GroupBox();
            this.btnSet1 = new System.Windows.Forms.Button();
            this.txt1VL = new System.Windows.Forms.TextBox();
            this.txt1AH = new System.Windows.Forms.TextBox();
            this.txt1VH = new System.Windows.Forms.TextBox();
            this.txt1AL = new System.Windows.Forms.TextBox();
            this.label16 = new System.Windows.Forms.Label();
            this.label15 = new System.Windows.Forms.Label();
            this.label14 = new System.Windows.Forms.Label();
            this.label20 = new System.Windows.Forms.Label();
            this.panel1 = new System.Windows.Forms.Panel();
            this.groupBox11 = new System.Windows.Forms.GroupBox();
            this.tableLayoutPanel2 = new System.Windows.Forms.TableLayoutPanel();
            this.btnCameraCmd = new System.Windows.Forms.Button();
            this.btnDOCmd = new System.Windows.Forms.Button();
            this.btnYLSCmd = new System.Windows.Forms.Button();
            this.btnZDCmd = new System.Windows.Forms.Button();
            this.btnCDOMCmd = new System.Windows.Forms.Button();
            this.groupBox1 = new System.Windows.Forms.GroupBox();
            this.tbxTime = new System.Windows.Forms.TextBox();
            this.btnTimer = new System.Windows.Forms.Button();
            this.label1 = new System.Windows.Forms.Label();
            this.groupBox10 = new System.Windows.Forms.GroupBox();
            this.btnSetTemp = new System.Windows.Forms.Button();
            this.label37 = new System.Windows.Forms.Label();
            this.txtTL = new System.Windows.Forms.TextBox();
            this.txtTH = new System.Windows.Forms.TextBox();
            this.label36 = new System.Windows.Forms.Label();
            this.pnlcmd.SuspendLayout();
            this.tableLayoutPanel1.SuspendLayout();
            this.groupBox2.SuspendLayout();
            this.groupBox3.SuspendLayout();
            this.groupBox8.SuspendLayout();
            this.groupBox7.SuspendLayout();
            this.groupBox6.SuspendLayout();
            this.groupBox5.SuspendLayout();
            this.groupBox4.SuspendLayout();
            this.panel1.SuspendLayout();
            this.groupBox11.SuspendLayout();
            this.tableLayoutPanel2.SuspendLayout();
            this.groupBox1.SuspendLayout();
            this.groupBox10.SuspendLayout();
            this.SuspendLayout();
            // 
            // timer1
            // 
            this.timer1.Tick += new System.EventHandler(this.timer1_Tick);
            // 
            // pnlcmd
            // 
            this.pnlcmd.Controls.Add(this.tableLayoutPanel1);
            this.pnlcmd.Dock = System.Windows.Forms.DockStyle.Fill;
            this.pnlcmd.Location = new System.Drawing.Point(0, 0);
            this.pnlcmd.Name = "pnlcmd";
            this.pnlcmd.Size = new System.Drawing.Size(738, 641);
            this.pnlcmd.TabIndex = 16;
            // 
            // tableLayoutPanel1
            // 
            this.tableLayoutPanel1.ColumnCount = 1;
            this.tableLayoutPanel1.ColumnStyles.Add(new System.Windows.Forms.ColumnStyle(System.Windows.Forms.SizeType.Percent, 100F));
            this.tableLayoutPanel1.Controls.Add(this.groupBox2, 0, 1);
            this.tableLayoutPanel1.Controls.Add(this.groupBox3, 0, 2);
            this.tableLayoutPanel1.Controls.Add(this.panel1, 0, 4);
            this.tableLayoutPanel1.Controls.Add(this.groupBox1, 0, 0);
            this.tableLayoutPanel1.Controls.Add(this.groupBox10, 0, 3);
            this.tableLayoutPanel1.Dock = System.Windows.Forms.DockStyle.Fill;
            this.tableLayoutPanel1.Location = new System.Drawing.Point(0, 0);
            this.tableLayoutPanel1.Name = "tableLayoutPanel1";
            this.tableLayoutPanel1.RowCount = 5;
            this.tableLayoutPanel1.RowStyles.Add(new System.Windows.Forms.RowStyle(System.Windows.Forms.SizeType.Percent, 10F));
            this.tableLayoutPanel1.RowStyles.Add(new System.Windows.Forms.RowStyle(System.Windows.Forms.SizeType.Percent, 10F));
            this.tableLayoutPanel1.RowStyles.Add(new System.Windows.Forms.RowStyle(System.Windows.Forms.SizeType.Percent, 53.04212F));
            this.tableLayoutPanel1.RowStyles.Add(new System.Windows.Forms.RowStyle(System.Windows.Forms.SizeType.Percent, 10.60842F));
            this.tableLayoutPanel1.RowStyles.Add(new System.Windows.Forms.RowStyle(System.Windows.Forms.SizeType.Percent, 17.16069F));
            this.tableLayoutPanel1.RowStyles.Add(new System.Windows.Forms.RowStyle(System.Windows.Forms.SizeType.Absolute, 20F));
            this.tableLayoutPanel1.Size = new System.Drawing.Size(738, 641);
            this.tableLayoutPanel1.TabIndex = 17;
            // 
            // groupBox2
            // 
            this.groupBox2.Controls.Add(this.txtInterval);
            this.groupBox2.Controls.Add(this.label8);
            this.groupBox2.Controls.Add(this.btnDO);
            this.groupBox2.Dock = System.Windows.Forms.DockStyle.Top;
            this.groupBox2.Font = new System.Drawing.Font("Times New Roman", 10.5F);
            this.groupBox2.ForeColor = System.Drawing.Color.Maroon;
            this.groupBox2.Location = new System.Drawing.Point(3, 66);
            this.groupBox2.Name = "groupBox2";
            this.groupBox2.Size = new System.Drawing.Size(732, 57);
            this.groupBox2.TabIndex = 15;
            this.groupBox2.TabStop = false;
            this.groupBox2.Text = "2.设置次接驳盒数据发送时间间隔";
            // 
            // txtInterval
            // 
            this.txtInterval.Font = new System.Drawing.Font("Times New Roman", 10.5F, System.Drawing.FontStyle.Regular, System.Drawing.GraphicsUnit.Point, ((byte)(0)));
            this.txtInterval.Location = new System.Drawing.Point(390, 22);
            this.txtInterval.Name = "txtInterval";
            this.txtInterval.Size = new System.Drawing.Size(77, 24);
            this.txtInterval.TabIndex = 16;
            this.txtInterval.Text = "0005";
            this.txtInterval.TextAlign = System.Windows.Forms.HorizontalAlignment.Center;
            // 
            // label8
            // 
            this.label8.AutoSize = true;
            this.label8.Font = new System.Drawing.Font("Times New Roman", 10.5F, System.Drawing.FontStyle.Bold, System.Drawing.GraphicsUnit.Point, ((byte)(0)));
            this.label8.ForeColor = System.Drawing.Color.Black;
            this.label8.Location = new System.Drawing.Point(163, 26);
            this.label8.Name = "label8";
            this.label8.Size = new System.Drawing.Size(194, 17);
            this.label8.TabIndex = 15;
            this.label8.Text = "接驳盒时间间隔（单位s）：";
            // 
            // btnDO
            // 
            this.btnDO.BackColor = System.Drawing.SystemColors.Control;
            this.btnDO.FlatStyle = System.Windows.Forms.FlatStyle.Flat;
            this.btnDO.ForeColor = System.Drawing.Color.FromArgb(((int)(((byte)(0)))), ((int)(((byte)(192)))), ((int)(((byte)(192)))));
            this.btnDO.Location = new System.Drawing.Point(641, 21);
            this.btnDO.Name = "btnDO";
            this.btnDO.Size = new System.Drawing.Size(75, 25);
            this.btnDO.TabIndex = 14;
            this.btnDO.Text = "执行";
            this.btnDO.UseVisualStyleBackColor = false;
            this.btnDO.Click += new System.EventHandler(this.btnDO_Click);
            // 
            // groupBox3
            // 
            this.groupBox3.Controls.Add(this.groupBox8);
            this.groupBox3.Controls.Add(this.groupBox7);
            this.groupBox3.Controls.Add(this.groupBox6);
            this.groupBox3.Controls.Add(this.groupBox5);
            this.groupBox3.Controls.Add(this.groupBox4);
            this.groupBox3.Dock = System.Windows.Forms.DockStyle.Top;
            this.groupBox3.Font = new System.Drawing.Font("Times New Roman", 10.5F);
            this.groupBox3.ForeColor = System.Drawing.Color.Maroon;
            this.groupBox3.Location = new System.Drawing.Point(3, 129);
            this.groupBox3.Name = "groupBox3";
            this.groupBox3.Size = new System.Drawing.Size(732, 331);
            this.groupBox3.TabIndex = 15;
            this.groupBox3.TabStop = false;
            this.groupBox3.Text = "3.次接驳盒报警阈值";
            // 
            // groupBox8
            // 
            this.groupBox8.Controls.Add(this.btnSet5);
            this.groupBox8.Controls.Add(this.txt5AL);
            this.groupBox8.Controls.Add(this.txt5AH);
            this.groupBox8.Controls.Add(this.txt5VL);
            this.groupBox8.Controls.Add(this.txt5VH);
            this.groupBox8.Controls.Add(this.label12);
            this.groupBox8.Controls.Add(this.label13);
            this.groupBox8.Controls.Add(this.label22);
            this.groupBox8.Controls.Add(this.label23);
            this.groupBox8.Dock = System.Windows.Forms.DockStyle.Top;
            this.groupBox8.ForeColor = System.Drawing.Color.FromArgb(((int)(((byte)(0)))), ((int)(((byte)(0)))), ((int)(((byte)(192)))));
            this.groupBox8.Location = new System.Drawing.Point(3, 264);
            this.groupBox8.Name = "groupBox8";
            this.groupBox8.Size = new System.Drawing.Size(726, 61);
            this.groupBox8.TabIndex = 20;
            this.groupBox8.TabStop = false;
            this.groupBox8.Text = "通道5";
            // 
            // btnSet5
            // 
            this.btnSet5.BackColor = System.Drawing.SystemColors.Control;
            this.btnSet5.FlatStyle = System.Windows.Forms.FlatStyle.Flat;
            this.btnSet5.ForeColor = System.Drawing.Color.FromArgb(((int)(((byte)(0)))), ((int)(((byte)(192)))), ((int)(((byte)(192)))));
            this.btnSet5.Location = new System.Drawing.Point(641, 23);
            this.btnSet5.Name = "btnSet5";
            this.btnSet5.Size = new System.Drawing.Size(75, 25);
            this.btnSet5.TabIndex = 14;
            this.btnSet5.Text = "执行";
            this.btnSet5.UseVisualStyleBackColor = false;
            this.btnSet5.Click += new System.EventHandler(this.btnSet5_Click);
            // 
            // txt5AL
            // 
            this.txt5AL.Font = new System.Drawing.Font("Times New Roman", 10.5F, System.Drawing.FontStyle.Regular, System.Drawing.GraphicsUnit.Point, ((byte)(0)));
            this.txt5AL.Location = new System.Drawing.Point(251, 24);
            this.txt5AL.Name = "txt5AL";
            this.txt5AL.Size = new System.Drawing.Size(55, 24);
            this.txt5AL.TabIndex = 16;
            this.txt5AL.Text = "100.00";
            this.txt5AL.TextAlign = System.Windows.Forms.HorizontalAlignment.Center;
            // 
            // txt5AH
            // 
            this.txt5AH.Font = new System.Drawing.Font("Times New Roman", 10.5F, System.Drawing.FontStyle.Regular, System.Drawing.GraphicsUnit.Point, ((byte)(0)));
            this.txt5AH.Location = new System.Drawing.Point(92, 24);
            this.txt5AH.Name = "txt5AH";
            this.txt5AH.Size = new System.Drawing.Size(55, 24);
            this.txt5AH.TabIndex = 16;
            this.txt5AH.Text = "110.00";
            this.txt5AH.TextAlign = System.Windows.Forms.HorizontalAlignment.Center;
            // 
            // txt5VL
            // 
            this.txt5VL.Font = new System.Drawing.Font("Times New Roman", 10.5F, System.Drawing.FontStyle.Regular, System.Drawing.GraphicsUnit.Point, ((byte)(0)));
            this.txt5VL.Location = new System.Drawing.Point(571, 24);
            this.txt5VL.Name = "txt5VL";
            this.txt5VL.Size = new System.Drawing.Size(55, 24);
            this.txt5VL.TabIndex = 10;
            this.txt5VL.Text = "374.00";
            this.txt5VL.TextAlign = System.Windows.Forms.HorizontalAlignment.Center;
            // 
            // txt5VH
            // 
            this.txt5VH.Font = new System.Drawing.Font("Times New Roman", 10.5F, System.Drawing.FontStyle.Regular, System.Drawing.GraphicsUnit.Point, ((byte)(0)));
            this.txt5VH.Location = new System.Drawing.Point(413, 24);
            this.txt5VH.Name = "txt5VH";
            this.txt5VH.Size = new System.Drawing.Size(55, 24);
            this.txt5VH.TabIndex = 1;
            this.txt5VH.Text = "376.00";
            this.txt5VH.TextAlign = System.Windows.Forms.HorizontalAlignment.Center;
            // 
            // label12
            // 
            this.label12.AutoSize = true;
            this.label12.Font = new System.Drawing.Font("Times New Roman", 10.5F, System.Drawing.FontStyle.Bold, System.Drawing.GraphicsUnit.Point, ((byte)(0)));
            this.label12.ForeColor = System.Drawing.Color.Black;
            this.label12.Location = new System.Drawing.Point(481, 28);
            this.label12.Name = "label12";
            this.label12.Size = new System.Drawing.Size(98, 17);
            this.label12.TabIndex = 9;
            this.label12.Text = "电压值下限：";
            // 
            // label13
            // 
            this.label13.AutoSize = true;
            this.label13.Font = new System.Drawing.Font("Times New Roman", 10.5F, System.Drawing.FontStyle.Bold, System.Drawing.GraphicsUnit.Point, ((byte)(0)));
            this.label13.ForeColor = System.Drawing.Color.Black;
            this.label13.Location = new System.Drawing.Point(321, 28);
            this.label13.Name = "label13";
            this.label13.Size = new System.Drawing.Size(98, 17);
            this.label13.TabIndex = 7;
            this.label13.Text = "电压值上限：";
            // 
            // label22
            // 
            this.label22.AutoSize = true;
            this.label22.Font = new System.Drawing.Font("Times New Roman", 10.5F, System.Drawing.FontStyle.Bold, System.Drawing.GraphicsUnit.Point, ((byte)(0)));
            this.label22.ForeColor = System.Drawing.Color.Black;
            this.label22.Location = new System.Drawing.Point(160, 28);
            this.label22.Name = "label22";
            this.label22.Size = new System.Drawing.Size(98, 17);
            this.label22.TabIndex = 2;
            this.label22.Text = "电流值下限：";
            // 
            // label23
            // 
            this.label23.AutoSize = true;
            this.label23.Font = new System.Drawing.Font("Times New Roman", 10.5F, System.Drawing.FontStyle.Bold, System.Drawing.GraphicsUnit.Point, ((byte)(0)));
            this.label23.ForeColor = System.Drawing.Color.Black;
            this.label23.Location = new System.Drawing.Point(1, 28);
            this.label23.Name = "label23";
            this.label23.Size = new System.Drawing.Size(98, 17);
            this.label23.TabIndex = 0;
            this.label23.Text = "电流值上限：";
            // 
            // groupBox7
            // 
            this.groupBox7.Controls.Add(this.btnSet4);
            this.groupBox7.Controls.Add(this.txt4AL);
            this.groupBox7.Controls.Add(this.txt4AH);
            this.groupBox7.Controls.Add(this.txt4VL);
            this.groupBox7.Controls.Add(this.txt4VH);
            this.groupBox7.Controls.Add(this.label7);
            this.groupBox7.Controls.Add(this.label9);
            this.groupBox7.Controls.Add(this.label10);
            this.groupBox7.Controls.Add(this.label11);
            this.groupBox7.Dock = System.Windows.Forms.DockStyle.Top;
            this.groupBox7.ForeColor = System.Drawing.Color.FromArgb(((int)(((byte)(0)))), ((int)(((byte)(0)))), ((int)(((byte)(192)))));
            this.groupBox7.Location = new System.Drawing.Point(3, 203);
            this.groupBox7.Name = "groupBox7";
            this.groupBox7.Size = new System.Drawing.Size(726, 61);
            this.groupBox7.TabIndex = 19;
            this.groupBox7.TabStop = false;
            this.groupBox7.Text = "通道4";
            // 
            // btnSet4
            // 
            this.btnSet4.BackColor = System.Drawing.SystemColors.Control;
            this.btnSet4.FlatStyle = System.Windows.Forms.FlatStyle.Flat;
            this.btnSet4.ForeColor = System.Drawing.Color.FromArgb(((int)(((byte)(0)))), ((int)(((byte)(192)))), ((int)(((byte)(192)))));
            this.btnSet4.Location = new System.Drawing.Point(641, 23);
            this.btnSet4.Name = "btnSet4";
            this.btnSet4.Size = new System.Drawing.Size(75, 25);
            this.btnSet4.TabIndex = 14;
            this.btnSet4.Text = "执行";
            this.btnSet4.UseVisualStyleBackColor = false;
            this.btnSet4.Click += new System.EventHandler(this.btnSet4_Click);
            // 
            // txt4AL
            // 
            this.txt4AL.Font = new System.Drawing.Font("Times New Roman", 10.5F, System.Drawing.FontStyle.Regular, System.Drawing.GraphicsUnit.Point, ((byte)(0)));
            this.txt4AL.Location = new System.Drawing.Point(251, 24);
            this.txt4AL.Name = "txt4AL";
            this.txt4AL.Size = new System.Drawing.Size(55, 24);
            this.txt4AL.TabIndex = 16;
            this.txt4AL.Text = "100.00";
            this.txt4AL.TextAlign = System.Windows.Forms.HorizontalAlignment.Center;
            // 
            // txt4AH
            // 
            this.txt4AH.Font = new System.Drawing.Font("Times New Roman", 10.5F, System.Drawing.FontStyle.Regular, System.Drawing.GraphicsUnit.Point, ((byte)(0)));
            this.txt4AH.Location = new System.Drawing.Point(92, 24);
            this.txt4AH.Name = "txt4AH";
            this.txt4AH.Size = new System.Drawing.Size(55, 24);
            this.txt4AH.TabIndex = 16;
            this.txt4AH.Text = "110.00";
            this.txt4AH.TextAlign = System.Windows.Forms.HorizontalAlignment.Center;
            // 
            // txt4VL
            // 
            this.txt4VL.Font = new System.Drawing.Font("Times New Roman", 10.5F, System.Drawing.FontStyle.Regular, System.Drawing.GraphicsUnit.Point, ((byte)(0)));
            this.txt4VL.Location = new System.Drawing.Point(571, 24);
            this.txt4VL.Name = "txt4VL";
            this.txt4VL.Size = new System.Drawing.Size(55, 24);
            this.txt4VL.TabIndex = 10;
            this.txt4VL.Text = "374.00";
            this.txt4VL.TextAlign = System.Windows.Forms.HorizontalAlignment.Center;
            // 
            // txt4VH
            // 
            this.txt4VH.Font = new System.Drawing.Font("Times New Roman", 10.5F, System.Drawing.FontStyle.Regular, System.Drawing.GraphicsUnit.Point, ((byte)(0)));
            this.txt4VH.Location = new System.Drawing.Point(413, 24);
            this.txt4VH.Name = "txt4VH";
            this.txt4VH.Size = new System.Drawing.Size(55, 24);
            this.txt4VH.TabIndex = 1;
            this.txt4VH.Text = "376.00";
            this.txt4VH.TextAlign = System.Windows.Forms.HorizontalAlignment.Center;
            // 
            // label7
            // 
            this.label7.AutoSize = true;
            this.label7.Font = new System.Drawing.Font("Times New Roman", 10.5F, System.Drawing.FontStyle.Bold, System.Drawing.GraphicsUnit.Point, ((byte)(0)));
            this.label7.ForeColor = System.Drawing.Color.Black;
            this.label7.Location = new System.Drawing.Point(481, 28);
            this.label7.Name = "label7";
            this.label7.Size = new System.Drawing.Size(98, 17);
            this.label7.TabIndex = 9;
            this.label7.Text = "电压值下限：";
            // 
            // label9
            // 
            this.label9.AutoSize = true;
            this.label9.Font = new System.Drawing.Font("Times New Roman", 10.5F, System.Drawing.FontStyle.Bold, System.Drawing.GraphicsUnit.Point, ((byte)(0)));
            this.label9.ForeColor = System.Drawing.Color.Black;
            this.label9.Location = new System.Drawing.Point(321, 28);
            this.label9.Name = "label9";
            this.label9.Size = new System.Drawing.Size(98, 17);
            this.label9.TabIndex = 7;
            this.label9.Text = "电压值上限：";
            // 
            // label10
            // 
            this.label10.AutoSize = true;
            this.label10.Font = new System.Drawing.Font("Times New Roman", 10.5F, System.Drawing.FontStyle.Bold, System.Drawing.GraphicsUnit.Point, ((byte)(0)));
            this.label10.ForeColor = System.Drawing.Color.Black;
            this.label10.Location = new System.Drawing.Point(160, 28);
            this.label10.Name = "label10";
            this.label10.Size = new System.Drawing.Size(98, 17);
            this.label10.TabIndex = 2;
            this.label10.Text = "电流值下限：";
            // 
            // label11
            // 
            this.label11.AutoSize = true;
            this.label11.Font = new System.Drawing.Font("Times New Roman", 10.5F, System.Drawing.FontStyle.Bold, System.Drawing.GraphicsUnit.Point, ((byte)(0)));
            this.label11.ForeColor = System.Drawing.Color.Black;
            this.label11.Location = new System.Drawing.Point(1, 28);
            this.label11.Name = "label11";
            this.label11.Size = new System.Drawing.Size(98, 17);
            this.label11.TabIndex = 0;
            this.label11.Text = "电流值上限：";
            // 
            // groupBox6
            // 
            this.groupBox6.Controls.Add(this.btnSet3);
            this.groupBox6.Controls.Add(this.txt3AL);
            this.groupBox6.Controls.Add(this.txt3AH);
            this.groupBox6.Controls.Add(this.txt3VL);
            this.groupBox6.Controls.Add(this.txt3VH);
            this.groupBox6.Controls.Add(this.label3);
            this.groupBox6.Controls.Add(this.label4);
            this.groupBox6.Controls.Add(this.label5);
            this.groupBox6.Controls.Add(this.label6);
            this.groupBox6.Dock = System.Windows.Forms.DockStyle.Top;
            this.groupBox6.ForeColor = System.Drawing.Color.FromArgb(((int)(((byte)(0)))), ((int)(((byte)(0)))), ((int)(((byte)(192)))));
            this.groupBox6.Location = new System.Drawing.Point(3, 142);
            this.groupBox6.Name = "groupBox6";
            this.groupBox6.Size = new System.Drawing.Size(726, 61);
            this.groupBox6.TabIndex = 18;
            this.groupBox6.TabStop = false;
            this.groupBox6.Text = "通道3";
            // 
            // btnSet3
            // 
            this.btnSet3.BackColor = System.Drawing.SystemColors.Control;
            this.btnSet3.FlatStyle = System.Windows.Forms.FlatStyle.Flat;
            this.btnSet3.ForeColor = System.Drawing.Color.FromArgb(((int)(((byte)(0)))), ((int)(((byte)(192)))), ((int)(((byte)(192)))));
            this.btnSet3.Location = new System.Drawing.Point(641, 23);
            this.btnSet3.Name = "btnSet3";
            this.btnSet3.Size = new System.Drawing.Size(75, 25);
            this.btnSet3.TabIndex = 14;
            this.btnSet3.Text = "执行";
            this.btnSet3.UseVisualStyleBackColor = false;
            this.btnSet3.Click += new System.EventHandler(this.btnSet3_Click);
            // 
            // txt3AL
            // 
            this.txt3AL.Font = new System.Drawing.Font("Times New Roman", 10.5F, System.Drawing.FontStyle.Regular, System.Drawing.GraphicsUnit.Point, ((byte)(0)));
            this.txt3AL.Location = new System.Drawing.Point(251, 24);
            this.txt3AL.Name = "txt3AL";
            this.txt3AL.Size = new System.Drawing.Size(55, 24);
            this.txt3AL.TabIndex = 16;
            this.txt3AL.Text = "100.00";
            this.txt3AL.TextAlign = System.Windows.Forms.HorizontalAlignment.Center;
            // 
            // txt3AH
            // 
            this.txt3AH.Font = new System.Drawing.Font("Times New Roman", 10.5F, System.Drawing.FontStyle.Regular, System.Drawing.GraphicsUnit.Point, ((byte)(0)));
            this.txt3AH.Location = new System.Drawing.Point(92, 24);
            this.txt3AH.Name = "txt3AH";
            this.txt3AH.Size = new System.Drawing.Size(55, 24);
            this.txt3AH.TabIndex = 16;
            this.txt3AH.Text = "110.00";
            this.txt3AH.TextAlign = System.Windows.Forms.HorizontalAlignment.Center;
            // 
            // txt3VL
            // 
            this.txt3VL.Font = new System.Drawing.Font("Times New Roman", 10.5F, System.Drawing.FontStyle.Regular, System.Drawing.GraphicsUnit.Point, ((byte)(0)));
            this.txt3VL.Location = new System.Drawing.Point(571, 24);
            this.txt3VL.Name = "txt3VL";
            this.txt3VL.Size = new System.Drawing.Size(55, 24);
            this.txt3VL.TabIndex = 10;
            this.txt3VL.Text = "374.00";
            this.txt3VL.TextAlign = System.Windows.Forms.HorizontalAlignment.Center;
            // 
            // txt3VH
            // 
            this.txt3VH.Font = new System.Drawing.Font("Times New Roman", 10.5F, System.Drawing.FontStyle.Regular, System.Drawing.GraphicsUnit.Point, ((byte)(0)));
            this.txt3VH.Location = new System.Drawing.Point(413, 24);
            this.txt3VH.Name = "txt3VH";
            this.txt3VH.Size = new System.Drawing.Size(55, 24);
            this.txt3VH.TabIndex = 1;
            this.txt3VH.Text = "376.00";
            this.txt3VH.TextAlign = System.Windows.Forms.HorizontalAlignment.Center;
            // 
            // label3
            // 
            this.label3.AutoSize = true;
            this.label3.Font = new System.Drawing.Font("Times New Roman", 10.5F, System.Drawing.FontStyle.Bold, System.Drawing.GraphicsUnit.Point, ((byte)(0)));
            this.label3.ForeColor = System.Drawing.Color.Black;
            this.label3.Location = new System.Drawing.Point(481, 28);
            this.label3.Name = "label3";
            this.label3.Size = new System.Drawing.Size(98, 17);
            this.label3.TabIndex = 9;
            this.label3.Text = "电压值下限：";
            // 
            // label4
            // 
            this.label4.AutoSize = true;
            this.label4.Font = new System.Drawing.Font("Times New Roman", 10.5F, System.Drawing.FontStyle.Bold, System.Drawing.GraphicsUnit.Point, ((byte)(0)));
            this.label4.ForeColor = System.Drawing.Color.Black;
            this.label4.Location = new System.Drawing.Point(321, 28);
            this.label4.Name = "label4";
            this.label4.Size = new System.Drawing.Size(98, 17);
            this.label4.TabIndex = 7;
            this.label4.Text = "电压值上限：";
            // 
            // label5
            // 
            this.label5.AutoSize = true;
            this.label5.Font = new System.Drawing.Font("Times New Roman", 10.5F, System.Drawing.FontStyle.Bold, System.Drawing.GraphicsUnit.Point, ((byte)(0)));
            this.label5.ForeColor = System.Drawing.Color.Black;
            this.label5.Location = new System.Drawing.Point(160, 28);
            this.label5.Name = "label5";
            this.label5.Size = new System.Drawing.Size(98, 17);
            this.label5.TabIndex = 2;
            this.label5.Text = "电流值下限：";
            // 
            // label6
            // 
            this.label6.AutoSize = true;
            this.label6.Font = new System.Drawing.Font("Times New Roman", 10.5F, System.Drawing.FontStyle.Bold, System.Drawing.GraphicsUnit.Point, ((byte)(0)));
            this.label6.ForeColor = System.Drawing.Color.Black;
            this.label6.Location = new System.Drawing.Point(1, 28);
            this.label6.Name = "label6";
            this.label6.Size = new System.Drawing.Size(98, 17);
            this.label6.TabIndex = 0;
            this.label6.Text = "电流值上限：";
            // 
            // groupBox5
            // 
            this.groupBox5.Controls.Add(this.btnSet2);
            this.groupBox5.Controls.Add(this.txt2AL);
            this.groupBox5.Controls.Add(this.txt2AH);
            this.groupBox5.Controls.Add(this.txt2VL);
            this.groupBox5.Controls.Add(this.txt2VH);
            this.groupBox5.Controls.Add(this.label17);
            this.groupBox5.Controls.Add(this.label18);
            this.groupBox5.Controls.Add(this.label19);
            this.groupBox5.Controls.Add(this.label21);
            this.groupBox5.Dock = System.Windows.Forms.DockStyle.Top;
            this.groupBox5.ForeColor = System.Drawing.Color.FromArgb(((int)(((byte)(0)))), ((int)(((byte)(0)))), ((int)(((byte)(192)))));
            this.groupBox5.Location = new System.Drawing.Point(3, 81);
            this.groupBox5.Name = "groupBox5";
            this.groupBox5.Size = new System.Drawing.Size(726, 61);
            this.groupBox5.TabIndex = 17;
            this.groupBox5.TabStop = false;
            this.groupBox5.Text = "通道2";
            // 
            // btnSet2
            // 
            this.btnSet2.BackColor = System.Drawing.SystemColors.Control;
            this.btnSet2.FlatStyle = System.Windows.Forms.FlatStyle.Flat;
            this.btnSet2.ForeColor = System.Drawing.Color.FromArgb(((int)(((byte)(0)))), ((int)(((byte)(192)))), ((int)(((byte)(192)))));
            this.btnSet2.Location = new System.Drawing.Point(641, 23);
            this.btnSet2.Name = "btnSet2";
            this.btnSet2.Size = new System.Drawing.Size(75, 25);
            this.btnSet2.TabIndex = 14;
            this.btnSet2.Text = "执行";
            this.btnSet2.UseVisualStyleBackColor = false;
            this.btnSet2.Click += new System.EventHandler(this.btnJWSet_Click);
            // 
            // txt2AL
            // 
            this.txt2AL.Font = new System.Drawing.Font("Times New Roman", 10.5F, System.Drawing.FontStyle.Regular, System.Drawing.GraphicsUnit.Point, ((byte)(0)));
            this.txt2AL.Location = new System.Drawing.Point(251, 24);
            this.txt2AL.Name = "txt2AL";
            this.txt2AL.Size = new System.Drawing.Size(55, 24);
            this.txt2AL.TabIndex = 16;
            this.txt2AL.Text = "100.00";
            this.txt2AL.TextAlign = System.Windows.Forms.HorizontalAlignment.Center;
            // 
            // txt2AH
            // 
            this.txt2AH.Font = new System.Drawing.Font("Times New Roman", 10.5F, System.Drawing.FontStyle.Regular, System.Drawing.GraphicsUnit.Point, ((byte)(0)));
            this.txt2AH.Location = new System.Drawing.Point(92, 24);
            this.txt2AH.Name = "txt2AH";
            this.txt2AH.Size = new System.Drawing.Size(55, 24);
            this.txt2AH.TabIndex = 16;
            this.txt2AH.Text = "110.00";
            this.txt2AH.TextAlign = System.Windows.Forms.HorizontalAlignment.Center;
            // 
            // txt2VL
            // 
            this.txt2VL.Font = new System.Drawing.Font("Times New Roman", 10.5F, System.Drawing.FontStyle.Regular, System.Drawing.GraphicsUnit.Point, ((byte)(0)));
            this.txt2VL.Location = new System.Drawing.Point(571, 24);
            this.txt2VL.Name = "txt2VL";
            this.txt2VL.Size = new System.Drawing.Size(55, 24);
            this.txt2VL.TabIndex = 10;
            this.txt2VL.Text = "374.00";
            this.txt2VL.TextAlign = System.Windows.Forms.HorizontalAlignment.Center;
            // 
            // txt2VH
            // 
            this.txt2VH.Font = new System.Drawing.Font("Times New Roman", 10.5F, System.Drawing.FontStyle.Regular, System.Drawing.GraphicsUnit.Point, ((byte)(0)));
            this.txt2VH.Location = new System.Drawing.Point(413, 24);
            this.txt2VH.Name = "txt2VH";
            this.txt2VH.Size = new System.Drawing.Size(55, 24);
            this.txt2VH.TabIndex = 1;
            this.txt2VH.Text = "376.00";
            this.txt2VH.TextAlign = System.Windows.Forms.HorizontalAlignment.Center;
            // 
            // label17
            // 
            this.label17.AutoSize = true;
            this.label17.Font = new System.Drawing.Font("Times New Roman", 10.5F, System.Drawing.FontStyle.Bold, System.Drawing.GraphicsUnit.Point, ((byte)(0)));
            this.label17.ForeColor = System.Drawing.Color.Black;
            this.label17.Location = new System.Drawing.Point(481, 28);
            this.label17.Name = "label17";
            this.label17.Size = new System.Drawing.Size(98, 17);
            this.label17.TabIndex = 9;
            this.label17.Text = "电压值下限：";
            // 
            // label18
            // 
            this.label18.AutoSize = true;
            this.label18.Font = new System.Drawing.Font("Times New Roman", 10.5F, System.Drawing.FontStyle.Bold, System.Drawing.GraphicsUnit.Point, ((byte)(0)));
            this.label18.ForeColor = System.Drawing.Color.Black;
            this.label18.Location = new System.Drawing.Point(321, 28);
            this.label18.Name = "label18";
            this.label18.Size = new System.Drawing.Size(98, 17);
            this.label18.TabIndex = 7;
            this.label18.Text = "电压值上限：";
            // 
            // label19
            // 
            this.label19.AutoSize = true;
            this.label19.Font = new System.Drawing.Font("Times New Roman", 10.5F, System.Drawing.FontStyle.Bold, System.Drawing.GraphicsUnit.Point, ((byte)(0)));
            this.label19.ForeColor = System.Drawing.Color.Black;
            this.label19.Location = new System.Drawing.Point(160, 28);
            this.label19.Name = "label19";
            this.label19.Size = new System.Drawing.Size(98, 17);
            this.label19.TabIndex = 2;
            this.label19.Text = "电流值下限：";
            // 
            // label21
            // 
            this.label21.AutoSize = true;
            this.label21.Font = new System.Drawing.Font("Times New Roman", 10.5F, System.Drawing.FontStyle.Bold, System.Drawing.GraphicsUnit.Point, ((byte)(0)));
            this.label21.ForeColor = System.Drawing.Color.Black;
            this.label21.Location = new System.Drawing.Point(1, 28);
            this.label21.Name = "label21";
            this.label21.Size = new System.Drawing.Size(98, 17);
            this.label21.TabIndex = 0;
            this.label21.Text = "电流值上限：";
            // 
            // groupBox4
            // 
            this.groupBox4.Controls.Add(this.btnSet1);
            this.groupBox4.Controls.Add(this.txt1VL);
            this.groupBox4.Controls.Add(this.txt1AH);
            this.groupBox4.Controls.Add(this.txt1VH);
            this.groupBox4.Controls.Add(this.txt1AL);
            this.groupBox4.Controls.Add(this.label16);
            this.groupBox4.Controls.Add(this.label15);
            this.groupBox4.Controls.Add(this.label14);
            this.groupBox4.Controls.Add(this.label20);
            this.groupBox4.Dock = System.Windows.Forms.DockStyle.Top;
            this.groupBox4.ForeColor = System.Drawing.Color.FromArgb(((int)(((byte)(0)))), ((int)(((byte)(0)))), ((int)(((byte)(192)))));
            this.groupBox4.Location = new System.Drawing.Point(3, 20);
            this.groupBox4.Name = "groupBox4";
            this.groupBox4.Size = new System.Drawing.Size(726, 61);
            this.groupBox4.TabIndex = 15;
            this.groupBox4.TabStop = false;
            this.groupBox4.Text = "通道1";
            // 
            // btnSet1
            // 
            this.btnSet1.BackColor = System.Drawing.SystemColors.Control;
            this.btnSet1.FlatStyle = System.Windows.Forms.FlatStyle.Flat;
            this.btnSet1.ForeColor = System.Drawing.Color.FromArgb(((int)(((byte)(0)))), ((int)(((byte)(192)))), ((int)(((byte)(192)))));
            this.btnSet1.Location = new System.Drawing.Point(641, 20);
            this.btnSet1.Name = "btnSet1";
            this.btnSet1.Size = new System.Drawing.Size(75, 25);
            this.btnSet1.TabIndex = 14;
            this.btnSet1.Text = "执行";
            this.btnSet1.UseVisualStyleBackColor = false;
            this.btnSet1.Click += new System.EventHandler(this.btnRJWSet_Click);
            // 
            // txt1VL
            // 
            this.txt1VL.Font = new System.Drawing.Font("Times New Roman", 10.5F, System.Drawing.FontStyle.Regular, System.Drawing.GraphicsUnit.Point, ((byte)(0)));
            this.txt1VL.Location = new System.Drawing.Point(571, 21);
            this.txt1VL.Name = "txt1VL";
            this.txt1VL.Size = new System.Drawing.Size(55, 24);
            this.txt1VL.TabIndex = 10;
            this.txt1VL.Text = "374.00";
            this.txt1VL.TextAlign = System.Windows.Forms.HorizontalAlignment.Center;
            // 
            // txt1AH
            // 
            this.txt1AH.Font = new System.Drawing.Font("Times New Roman", 10.5F, System.Drawing.FontStyle.Regular, System.Drawing.GraphicsUnit.Point, ((byte)(0)));
            this.txt1AH.Location = new System.Drawing.Point(92, 21);
            this.txt1AH.Name = "txt1AH";
            this.txt1AH.Size = new System.Drawing.Size(55, 24);
            this.txt1AH.TabIndex = 16;
            this.txt1AH.Text = "110.00";
            this.txt1AH.TextAlign = System.Windows.Forms.HorizontalAlignment.Center;
            // 
            // txt1VH
            // 
            this.txt1VH.Font = new System.Drawing.Font("Times New Roman", 10.5F, System.Drawing.FontStyle.Regular, System.Drawing.GraphicsUnit.Point, ((byte)(0)));
            this.txt1VH.Location = new System.Drawing.Point(413, 21);
            this.txt1VH.Name = "txt1VH";
            this.txt1VH.Size = new System.Drawing.Size(55, 24);
            this.txt1VH.TabIndex = 1;
            this.txt1VH.Text = "376.00";
            this.txt1VH.TextAlign = System.Windows.Forms.HorizontalAlignment.Center;
            // 
            // txt1AL
            // 
            this.txt1AL.Font = new System.Drawing.Font("Times New Roman", 10.5F, System.Drawing.FontStyle.Regular, System.Drawing.GraphicsUnit.Point, ((byte)(0)));
            this.txt1AL.Location = new System.Drawing.Point(251, 21);
            this.txt1AL.Name = "txt1AL";
            this.txt1AL.Size = new System.Drawing.Size(55, 24);
            this.txt1AL.TabIndex = 16;
            this.txt1AL.Text = "100.00";
            this.txt1AL.TextAlign = System.Windows.Forms.HorizontalAlignment.Center;
            // 
            // label16
            // 
            this.label16.AutoSize = true;
            this.label16.Font = new System.Drawing.Font("Times New Roman", 10.5F, System.Drawing.FontStyle.Bold, System.Drawing.GraphicsUnit.Point, ((byte)(0)));
            this.label16.ForeColor = System.Drawing.Color.Black;
            this.label16.Location = new System.Drawing.Point(481, 25);
            this.label16.Name = "label16";
            this.label16.Size = new System.Drawing.Size(98, 17);
            this.label16.TabIndex = 9;
            this.label16.Text = "电压值下限：";
            // 
            // label15
            // 
            this.label15.AutoSize = true;
            this.label15.Font = new System.Drawing.Font("Times New Roman", 10.5F, System.Drawing.FontStyle.Bold, System.Drawing.GraphicsUnit.Point, ((byte)(0)));
            this.label15.ForeColor = System.Drawing.Color.Black;
            this.label15.Location = new System.Drawing.Point(321, 25);
            this.label15.Name = "label15";
            this.label15.Size = new System.Drawing.Size(98, 17);
            this.label15.TabIndex = 7;
            this.label15.Text = "电压值上限：";
            // 
            // label14
            // 
            this.label14.AutoSize = true;
            this.label14.Font = new System.Drawing.Font("Times New Roman", 10.5F, System.Drawing.FontStyle.Bold, System.Drawing.GraphicsUnit.Point, ((byte)(0)));
            this.label14.ForeColor = System.Drawing.Color.Black;
            this.label14.Location = new System.Drawing.Point(160, 25);
            this.label14.Name = "label14";
            this.label14.Size = new System.Drawing.Size(98, 17);
            this.label14.TabIndex = 2;
            this.label14.Text = "电流值下限：";
            // 
            // label20
            // 
            this.label20.AutoSize = true;
            this.label20.Font = new System.Drawing.Font("宋体", 10.5F, System.Drawing.FontStyle.Bold, System.Drawing.GraphicsUnit.Point, ((byte)(134)));
            this.label20.ForeColor = System.Drawing.Color.Black;
            this.label20.Location = new System.Drawing.Point(1, 25);
            this.label20.Name = "label20";
            this.label20.Size = new System.Drawing.Size(97, 14);
            this.label20.TabIndex = 0;
            this.label20.Text = "电流值上限：";
            // 
            // panel1
            // 
            this.panel1.Controls.Add(this.groupBox11);
            this.panel1.Dock = System.Windows.Forms.DockStyle.Fill;
            this.panel1.Location = new System.Drawing.Point(3, 533);
            this.panel1.Name = "panel1";
            this.panel1.Size = new System.Drawing.Size(732, 105);
            this.panel1.TabIndex = 17;
            // 
            // groupBox11
            // 
            this.groupBox11.Controls.Add(this.tableLayoutPanel2);
            this.groupBox11.Dock = System.Windows.Forms.DockStyle.Fill;
            this.groupBox11.Font = new System.Drawing.Font("Times New Roman", 10.5F);
            this.groupBox11.ForeColor = System.Drawing.Color.Maroon;
            this.groupBox11.Location = new System.Drawing.Point(0, 0);
            this.groupBox11.Name = "groupBox11";
            this.groupBox11.Size = new System.Drawing.Size(732, 105);
            this.groupBox11.TabIndex = 0;
            this.groupBox11.TabStop = false;
            this.groupBox11.Text = "5.其余传感器指令";
            // 
            // tableLayoutPanel2
            // 
            this.tableLayoutPanel2.ColumnCount = 5;
            this.tableLayoutPanel2.ColumnStyles.Add(new System.Windows.Forms.ColumnStyle(System.Windows.Forms.SizeType.Percent, 20F));
            this.tableLayoutPanel2.ColumnStyles.Add(new System.Windows.Forms.ColumnStyle(System.Windows.Forms.SizeType.Percent, 20F));
            this.tableLayoutPanel2.ColumnStyles.Add(new System.Windows.Forms.ColumnStyle(System.Windows.Forms.SizeType.Percent, 20F));
            this.tableLayoutPanel2.ColumnStyles.Add(new System.Windows.Forms.ColumnStyle(System.Windows.Forms.SizeType.Percent, 20F));
            this.tableLayoutPanel2.ColumnStyles.Add(new System.Windows.Forms.ColumnStyle(System.Windows.Forms.SizeType.Percent, 20F));
            this.tableLayoutPanel2.Controls.Add(this.btnCameraCmd, 0, 0);
            this.tableLayoutPanel2.Controls.Add(this.btnDOCmd, 1, 0);
            this.tableLayoutPanel2.Controls.Add(this.btnYLSCmd, 2, 0);
            this.tableLayoutPanel2.Controls.Add(this.btnZDCmd, 3, 0);
            this.tableLayoutPanel2.Controls.Add(this.btnCDOMCmd, 4, 0);
            this.tableLayoutPanel2.Dock = System.Windows.Forms.DockStyle.Fill;
            this.tableLayoutPanel2.Location = new System.Drawing.Point(3, 20);
            this.tableLayoutPanel2.Name = "tableLayoutPanel2";
            this.tableLayoutPanel2.RowCount = 1;
            this.tableLayoutPanel2.RowStyles.Add(new System.Windows.Forms.RowStyle(System.Windows.Forms.SizeType.Percent, 100F));
            this.tableLayoutPanel2.Size = new System.Drawing.Size(726, 82);
            this.tableLayoutPanel2.TabIndex = 0;
            // 
            // btnCameraCmd
            // 
            this.btnCameraCmd.BackColor = System.Drawing.SystemColors.Control;
            this.btnCameraCmd.Dock = System.Windows.Forms.DockStyle.Fill;
            this.btnCameraCmd.FlatStyle = System.Windows.Forms.FlatStyle.Flat;
            this.btnCameraCmd.ForeColor = System.Drawing.Color.FromArgb(((int)(((byte)(0)))), ((int)(((byte)(192)))), ((int)(((byte)(192)))));
            this.btnCameraCmd.Location = new System.Drawing.Point(3, 3);
            this.btnCameraCmd.Name = "btnCameraCmd";
            this.btnCameraCmd.Size = new System.Drawing.Size(139, 76);
            this.btnCameraCmd.TabIndex = 0;
            this.btnCameraCmd.Text = "摄像头";
            this.btnCameraCmd.UseVisualStyleBackColor = false;
            this.btnCameraCmd.Click += new System.EventHandler(this.btnCameraCmd_Click);
            // 
            // btnDOCmd
            // 
            this.btnDOCmd.BackColor = System.Drawing.SystemColors.Control;
            this.btnDOCmd.Dock = System.Windows.Forms.DockStyle.Fill;
            this.btnDOCmd.Enabled = false;
            this.btnDOCmd.FlatStyle = System.Windows.Forms.FlatStyle.Flat;
            this.btnDOCmd.ForeColor = System.Drawing.Color.FromArgb(((int)(((byte)(0)))), ((int)(((byte)(192)))), ((int)(((byte)(192)))));
            this.btnDOCmd.Location = new System.Drawing.Point(148, 3);
            this.btnDOCmd.Name = "btnDOCmd";
            this.btnDOCmd.Size = new System.Drawing.Size(139, 76);
            this.btnDOCmd.TabIndex = 1;
            this.btnDOCmd.Text = "待完善1";
            this.btnDOCmd.UseVisualStyleBackColor = false;
            this.btnDOCmd.Click += new System.EventHandler(this.btnDOCmd_Click);
            // 
            // btnYLSCmd
            // 
            this.btnYLSCmd.BackColor = System.Drawing.SystemColors.Control;
            this.btnYLSCmd.Dock = System.Windows.Forms.DockStyle.Fill;
            this.btnYLSCmd.Enabled = false;
            this.btnYLSCmd.FlatStyle = System.Windows.Forms.FlatStyle.Flat;
            this.btnYLSCmd.ForeColor = System.Drawing.Color.FromArgb(((int)(((byte)(0)))), ((int)(((byte)(192)))), ((int)(((byte)(192)))));
            this.btnYLSCmd.Location = new System.Drawing.Point(293, 3);
            this.btnYLSCmd.Name = "btnYLSCmd";
            this.btnYLSCmd.Size = new System.Drawing.Size(139, 76);
            this.btnYLSCmd.TabIndex = 2;
            this.btnYLSCmd.Text = "待完善2";
            this.btnYLSCmd.UseVisualStyleBackColor = false;
            // 
            // btnZDCmd
            // 
            this.btnZDCmd.BackColor = System.Drawing.SystemColors.Control;
            this.btnZDCmd.Dock = System.Windows.Forms.DockStyle.Fill;
            this.btnZDCmd.Enabled = false;
            this.btnZDCmd.FlatStyle = System.Windows.Forms.FlatStyle.Flat;
            this.btnZDCmd.ForeColor = System.Drawing.Color.FromArgb(((int)(((byte)(0)))), ((int)(((byte)(192)))), ((int)(((byte)(192)))));
            this.btnZDCmd.Location = new System.Drawing.Point(438, 3);
            this.btnZDCmd.Name = "btnZDCmd";
            this.btnZDCmd.Size = new System.Drawing.Size(139, 76);
            this.btnZDCmd.TabIndex = 3;
            this.btnZDCmd.Text = "待完善3";
            this.btnZDCmd.UseVisualStyleBackColor = false;
            // 
            // btnCDOMCmd
            // 
            this.btnCDOMCmd.BackColor = System.Drawing.SystemColors.Control;
            this.btnCDOMCmd.Dock = System.Windows.Forms.DockStyle.Fill;
            this.btnCDOMCmd.Enabled = false;
            this.btnCDOMCmd.FlatStyle = System.Windows.Forms.FlatStyle.Flat;
            this.btnCDOMCmd.ForeColor = System.Drawing.Color.FromArgb(((int)(((byte)(0)))), ((int)(((byte)(192)))), ((int)(((byte)(192)))));
            this.btnCDOMCmd.Location = new System.Drawing.Point(583, 3);
            this.btnCDOMCmd.Name = "btnCDOMCmd";
            this.btnCDOMCmd.Size = new System.Drawing.Size(140, 76);
            this.btnCDOMCmd.TabIndex = 4;
            this.btnCDOMCmd.Text = "待完善4";
            this.btnCDOMCmd.UseVisualStyleBackColor = false;
            // 
            // groupBox1
            // 
            this.groupBox1.Controls.Add(this.tbxTime);
            this.groupBox1.Controls.Add(this.btnTimer);
            this.groupBox1.Controls.Add(this.label1);
            this.groupBox1.Dock = System.Windows.Forms.DockStyle.Top;
            this.groupBox1.Font = new System.Drawing.Font("Times New Roman", 10.5F);
            this.groupBox1.ForeColor = System.Drawing.Color.Maroon;
            this.groupBox1.Location = new System.Drawing.Point(3, 3);
            this.groupBox1.Name = "groupBox1";
            this.groupBox1.Size = new System.Drawing.Size(732, 57);
            this.groupBox1.TabIndex = 0;
            this.groupBox1.TabStop = false;
            this.groupBox1.Text = "1.校准时钟";
            // 
            // tbxTime
            // 
            this.tbxTime.BackColor = System.Drawing.Color.White;
            this.tbxTime.Location = new System.Drawing.Point(332, 23);
            this.tbxTime.Name = "tbxTime";
            this.tbxTime.ReadOnly = true;
            this.tbxTime.Size = new System.Drawing.Size(191, 24);
            this.tbxTime.TabIndex = 15;
            this.tbxTime.TextAlign = System.Windows.Forms.HorizontalAlignment.Center;
            // 
            // btnTimer
            // 
            this.btnTimer.BackColor = System.Drawing.SystemColors.Control;
            this.btnTimer.Enabled = false;
            this.btnTimer.FlatStyle = System.Windows.Forms.FlatStyle.Flat;
            this.btnTimer.Font = new System.Drawing.Font("宋体", 10.5F, System.Drawing.FontStyle.Regular, System.Drawing.GraphicsUnit.Point, ((byte)(134)));
            this.btnTimer.ForeColor = System.Drawing.Color.FromArgb(((int)(((byte)(0)))), ((int)(((byte)(192)))), ((int)(((byte)(192)))));
            this.btnTimer.Location = new System.Drawing.Point(641, 21);
            this.btnTimer.Name = "btnTimer";
            this.btnTimer.Size = new System.Drawing.Size(75, 25);
            this.btnTimer.TabIndex = 14;
            this.btnTimer.Text = "执行";
            this.btnTimer.UseVisualStyleBackColor = false;
            this.btnTimer.Click += new System.EventHandler(this.btnTimer_Click);
            // 
            // label1
            // 
            this.label1.AutoSize = true;
            this.label1.Font = new System.Drawing.Font("Times New Roman", 10.5F, System.Drawing.FontStyle.Bold, System.Drawing.GraphicsUnit.Point, ((byte)(0)));
            this.label1.ForeColor = System.Drawing.Color.Black;
            this.label1.Location = new System.Drawing.Point(167, 26);
            this.label1.Name = "label1";
            this.label1.Size = new System.Drawing.Size(113, 17);
            this.label1.TabIndex = 0;
            this.label1.Text = "系统当前时钟：";
            // 
            // groupBox10
            // 
            this.groupBox10.Controls.Add(this.btnSetTemp);
            this.groupBox10.Controls.Add(this.label37);
            this.groupBox10.Controls.Add(this.txtTL);
            this.groupBox10.Controls.Add(this.txtTH);
            this.groupBox10.Controls.Add(this.label36);
            this.groupBox10.Dock = System.Windows.Forms.DockStyle.Fill;
            this.groupBox10.Font = new System.Drawing.Font("Times New Roman", 10.5F);
            this.groupBox10.ForeColor = System.Drawing.Color.Maroon;
            this.groupBox10.Location = new System.Drawing.Point(3, 466);
            this.groupBox10.Name = "groupBox10";
            this.groupBox10.Size = new System.Drawing.Size(732, 61);
            this.groupBox10.TabIndex = 18;
            this.groupBox10.TabStop = false;
            this.groupBox10.Text = "4.设置次接驳盒舱内温度上下限";
            // 
            // btnSetTemp
            // 
            this.btnSetTemp.BackColor = System.Drawing.SystemColors.Control;
            this.btnSetTemp.FlatStyle = System.Windows.Forms.FlatStyle.Flat;
            this.btnSetTemp.Font = new System.Drawing.Font("Times New Roman", 10.5F, System.Drawing.FontStyle.Regular, System.Drawing.GraphicsUnit.Point, ((byte)(0)));
            this.btnSetTemp.ForeColor = System.Drawing.Color.FromArgb(((int)(((byte)(0)))), ((int)(((byte)(192)))), ((int)(((byte)(192)))));
            this.btnSetTemp.Location = new System.Drawing.Point(644, 25);
            this.btnSetTemp.Name = "btnSetTemp";
            this.btnSetTemp.Size = new System.Drawing.Size(75, 25);
            this.btnSetTemp.TabIndex = 14;
            this.btnSetTemp.Text = "执行";
            this.btnSetTemp.UseVisualStyleBackColor = false;
            this.btnSetTemp.Click += new System.EventHandler(this.btnTempSet_Click);
            // 
            // label37
            // 
            this.label37.AutoSize = true;
            this.label37.Font = new System.Drawing.Font("Times New Roman", 10.5F, System.Drawing.FontStyle.Bold, System.Drawing.GraphicsUnit.Point, ((byte)(0)));
            this.label37.ForeColor = System.Drawing.Color.Black;
            this.label37.Location = new System.Drawing.Point(178, 29);
            this.label37.Name = "label37";
            this.label37.Size = new System.Drawing.Size(98, 17);
            this.label37.TabIndex = 0;
            this.label37.Text = "温度值上限：";
            // 
            // txtTL
            // 
            this.txtTL.Font = new System.Drawing.Font("Times New Roman", 10.5F, System.Drawing.FontStyle.Regular, System.Drawing.GraphicsUnit.Point, ((byte)(0)));
            this.txtTL.Location = new System.Drawing.Point(534, 27);
            this.txtTL.Name = "txtTL";
            this.txtTL.Size = new System.Drawing.Size(55, 24);
            this.txtTL.TabIndex = 10;
            this.txtTL.Text = "05.00";
            this.txtTL.TextAlign = System.Windows.Forms.HorizontalAlignment.Center;
            // 
            // txtTH
            // 
            this.txtTH.Font = new System.Drawing.Font("Times New Roman", 10.5F, System.Drawing.FontStyle.Regular, System.Drawing.GraphicsUnit.Point, ((byte)(0)));
            this.txtTH.Location = new System.Drawing.Point(311, 27);
            this.txtTH.Name = "txtTH";
            this.txtTH.Size = new System.Drawing.Size(55, 24);
            this.txtTH.TabIndex = 1;
            this.txtTH.Text = "70.00";
            this.txtTH.TextAlign = System.Windows.Forms.HorizontalAlignment.Center;
            // 
            // label36
            // 
            this.label36.AutoSize = true;
            this.label36.Font = new System.Drawing.Font("Times New Roman", 10.5F, System.Drawing.FontStyle.Bold, System.Drawing.GraphicsUnit.Point, ((byte)(0)));
            this.label36.ForeColor = System.Drawing.Color.Black;
            this.label36.Location = new System.Drawing.Point(401, 29);
            this.label36.Name = "label36";
            this.label36.Size = new System.Drawing.Size(98, 17);
            this.label36.TabIndex = 2;
            this.label36.Text = "温度值下限：";
            // 
            // cmdSet
            // 
            this.AutoScaleDimensions = new System.Drawing.SizeF(6F, 12F);
            this.AutoScaleMode = System.Windows.Forms.AutoScaleMode.Font;
            this.BackColor = System.Drawing.SystemColors.Control;
            this.ClientSize = new System.Drawing.Size(738, 641);
            this.Controls.Add(this.pnlcmd);
            this.Icon = ((System.Drawing.Icon)(resources.GetObject("$this.Icon")));
            this.MaximizeBox = false;
            this.Name = "cmdSet";
            this.StartPosition = System.Windows.Forms.FormStartPosition.CenterScreen;
            this.Text = "次接驳盒指令设置界面";
            this.Load += new System.EventHandler(this.cmdSet_Load);
            this.pnlcmd.ResumeLayout(false);
            this.tableLayoutPanel1.ResumeLayout(false);
            this.groupBox2.ResumeLayout(false);
            this.groupBox2.PerformLayout();
            this.groupBox3.ResumeLayout(false);
            this.groupBox8.ResumeLayout(false);
            this.groupBox8.PerformLayout();
            this.groupBox7.ResumeLayout(false);
            this.groupBox7.PerformLayout();
            this.groupBox6.ResumeLayout(false);
            this.groupBox6.PerformLayout();
            this.groupBox5.ResumeLayout(false);
            this.groupBox5.PerformLayout();
            this.groupBox4.ResumeLayout(false);
            this.groupBox4.PerformLayout();
            this.panel1.ResumeLayout(false);
            this.groupBox11.ResumeLayout(false);
            this.tableLayoutPanel2.ResumeLayout(false);
            this.groupBox1.ResumeLayout(false);
            this.groupBox1.PerformLayout();
            this.groupBox10.ResumeLayout(false);
            this.groupBox10.PerformLayout();
            this.ResumeLayout(false);

        }

        #endregion

        private System.Windows.Forms.Timer timer1;
        private System.Windows.Forms.Panel pnlcmd;
        private System.Windows.Forms.TableLayoutPanel tableLayoutPanel1;
        private System.Windows.Forms.GroupBox groupBox2;
        private System.Windows.Forms.TextBox txtInterval;
        private System.Windows.Forms.Label label8;
        private System.Windows.Forms.Button btnDO;
        private System.Windows.Forms.GroupBox groupBox3;
        private System.Windows.Forms.Button btnSetTemp;
        private System.Windows.Forms.TextBox txtTL;
        private System.Windows.Forms.TextBox txtTH;
        private System.Windows.Forms.Label label36;
        private System.Windows.Forms.Label label37;
        private System.Windows.Forms.GroupBox groupBox5;
        private System.Windows.Forms.Button btnSet2;
        private System.Windows.Forms.TextBox txt2AL;
        private System.Windows.Forms.TextBox txt2AH;
        private System.Windows.Forms.TextBox txt2VL;
        private System.Windows.Forms.TextBox txt2VH;
        private System.Windows.Forms.Label label17;
        private System.Windows.Forms.Label label18;
        private System.Windows.Forms.Label label19;
        private System.Windows.Forms.Label label21;
        private System.Windows.Forms.GroupBox groupBox4;
        private System.Windows.Forms.Button btnSet1;
        private System.Windows.Forms.TextBox txt1AL;
        private System.Windows.Forms.TextBox txt1AH;
        private System.Windows.Forms.TextBox txt1VL;
        private System.Windows.Forms.TextBox txt1VH;
        private System.Windows.Forms.Label label16;
        private System.Windows.Forms.Label label15;
        private System.Windows.Forms.Label label14;
        private System.Windows.Forms.Label label20;
        private System.Windows.Forms.Panel panel1;
        private System.Windows.Forms.GroupBox groupBox11;
        private System.Windows.Forms.TableLayoutPanel tableLayoutPanel2;
        private System.Windows.Forms.Button btnCameraCmd;
        private System.Windows.Forms.Button btnDOCmd;
        private System.Windows.Forms.Button btnYLSCmd;
        private System.Windows.Forms.Button btnZDCmd;
        private System.Windows.Forms.Button btnCDOMCmd;
        private System.Windows.Forms.GroupBox groupBox1;
        private System.Windows.Forms.TextBox tbxTime;
        private System.Windows.Forms.Button btnTimer;
        private System.Windows.Forms.Label label1;
        private System.Windows.Forms.GroupBox groupBox6;
        private System.Windows.Forms.Button btnSet3;
        private System.Windows.Forms.TextBox txt3AL;
        private System.Windows.Forms.TextBox txt3AH;
        private System.Windows.Forms.TextBox txt3VL;
        private System.Windows.Forms.TextBox txt3VH;
        private System.Windows.Forms.Label label3;
        private System.Windows.Forms.Label label4;
        private System.Windows.Forms.Label label5;
        private System.Windows.Forms.Label label6;
        private System.Windows.Forms.GroupBox groupBox7;
        private System.Windows.Forms.Button btnSet4;
        private System.Windows.Forms.TextBox txt4AL;
        private System.Windows.Forms.TextBox txt4AH;
        private System.Windows.Forms.TextBox txt4VL;
        private System.Windows.Forms.TextBox txt4VH;
        private System.Windows.Forms.Label label7;
        private System.Windows.Forms.Label label9;
        private System.Windows.Forms.Label label10;
        private System.Windows.Forms.Label label11;
        private System.Windows.Forms.GroupBox groupBox8;
        private System.Windows.Forms.TextBox txt5AL;
        private System.Windows.Forms.TextBox txt5AH;
        private System.Windows.Forms.TextBox txt5VL;
        private System.Windows.Forms.TextBox txt5VH;
        private System.Windows.Forms.Label label12;
        private System.Windows.Forms.Label label13;
        private System.Windows.Forms.Label label22;
        private System.Windows.Forms.Label label23;
        private System.Windows.Forms.Button btnSet5;
        private System.Windows.Forms.GroupBox groupBox10;
    }
}
