# Supplementary material
Source: MDPI journal article supplement (https://www.mdpi.com/2077-1312/10/8/1051)
Supplement: s1 [file s1 › OSNSystem/OSNSystem/OSNSystem/cmdSet.resx]

<?xml version="1.0" encoding="utf-8"?>
<root>
  <!-- 
    Microsoft ResX Schema 
    
    Version 2.0
    
    The primary goals of this format is to allow a simple XML format 
    that is mostly human readable. The generation and parsing of the 
    various data types are done through the TypeConverter classes 
    associated with the data types.
    
    Example:
    
    ... ado.net/XML headers & schema ...
    <resheader name="resmimetype">text/microsoft-resx</resheader>
    <resheader name="version">2.0</resheader>
    <resheader name="reader">System.Resources.ResXResourceReader, System.Windows.Forms, ...</resheader>
    <resheader name="writer">System.Resources.ResXResourceWriter, System.Windows.Forms, ...</resheader>
    <data name="Name1"><value>this is my long string</value><comment>this is a comment</comment></data>
    <data name="Color1" type="System.Drawing.Color, System.Drawing">Blue</data>
    <data name="Bitmap1" mimetype="application/x-microsoft.net.object.binary.base64">
        <value>[base64 mime encoded serialized .NET Framework object]</value>
    </data>
    <data name="Icon1" type="System.Drawing.Icon, System.Drawing" mimetype="application/x-microsoft.net.object.bytearray.base64">
        <value>[base64 mime encoded string representing a byte array form of the .NET Framework object]</value>
        <comment>This is a comment</comment>
    </data>
                
    There are any number of "resheader" rows that contain simple 
    name/value pairs.
    
    Each data row contains a name, and value. The row also contains a 
    type or mimetype. Type corresponds to a .NET class that support 
    text/value conversion through the TypeConverter architecture. 
    Classes that don't support this are serialized and stored with the 
    mimetype set.
    
    The mimetype is used for serialized objects, and tells the 
    ResXResourceReader how to depersist the object. This is currently not 
    extensible. For a given mimetype the value must be set accordingly:
    
    Note - application/x-microsoft.net.object.binary.base64 is the format 
    that the ResXResourceWriter will generate, however the reader can 
    read any of the formats listed below.
    
    mimetype: application/x-microsoft.net.object.binary.base64
    value   : The object must be serialized with 
            : System.Runtime.Serialization.Formatters.Binary.BinaryFormatter
            : and then encoded with base64 encoding.
    
    mimetype: application/x-microsoft.net.object.soap.base64
    value   : The object must be serialized with 
            : System.Runtime.Serialization.Formatters.Soap.SoapFormatter
            : and then encoded with base64 encoding.

    mimetype: application/x-microsoft.net.object.bytearray.base64
    value   : The object must be serialized into a byte array 
            : using a System.ComponentModel.TypeConverter
            : and then encoded with base64 encoding.
    -->
  <xsd:schema id="root" xmlns="" xmlns:xsd="http://www.w3.org/2001/XMLSchema" xmlns:msdata="urn:schemas-microsoft-com:xml-msdata">
    <xsd:import namespace="http://www.w3.org/XML/1998/namespace" />
    <xsd:element name="root" msdata:IsDataSet="true">
      <xsd:complexType>
        <xsd:choice maxOccurs="unbounded">
          <xsd:element name="metadata">
            <xsd:complexType>
              <xsd:sequence>
                <xsd:element name="value" type="xsd:string" minOccurs="0" />
              </xsd:sequence>
              <xsd:attribute name="name" use="required" type="xsd:string" />
              <xsd:attribute name="type" type="xsd:string" />
              <xsd:attribute name="mimetype" type="xsd:string" />
              <xsd:attribute ref="xml:space" />
            </xsd:complexType>
          </xsd:element>
          <xsd:element name="assembly">
            <xsd:complexType>
              <xsd:attribute name="alias" type="xsd:string" />
              <xsd:attribute name="name" type="xsd:string" />
            </xsd:complexType>
          </xsd:element>
          <xsd:element name="data">
            <xsd:complexType>
              <xsd:sequence>
                <xsd:element name="value" type="xsd:string" minOccurs="0" msdata:Ordinal="1" />
                <xsd:element name="comment" type="xsd:string" minOccurs="0" msdata:Ordinal="2" />
              </xsd:sequence>
              <xsd:attribute name="name" type="xsd:string" use="required" msdata:Ordinal="1" />
              <xsd:attribute name="type" type="xsd:string" msdata:Ordinal="3" />
              <xsd:attribute name="mimetype" type="xsd:string" msdata:Ordinal="4" />
              <xsd:attribute ref="xml:space" />
            </xsd:complexType>
          </xsd:element>
          <xsd:element name="resheader">
            <xsd:complexType>
              <xsd:sequence>
                <xsd:element name="value" type="xsd:string" minOccurs="0" msdata:Ordinal="1" />
              </xsd:sequence>
              <xsd:attribute name="name" type="xsd:string" use="required" />
            </xsd:complexType>
          </xsd:element>
        </xsd:choice>
      </xsd:complexType>
    </xsd:element>
  </xsd:schema>
  <resheader name="resmimetype">
    <value>text/microsoft-resx</value>
  </resheader>
  <resheader name="version">
    <value>2.0</value>
  </resheader>
  <resheader name="reader">
    <value>System.Resources.ResXResourceReader, System.Windows.Forms, Version=4.0.0.0, Culture=neutral, PublicKeyToken=b77a5c561934e089</value>
  </resheader>
  <resheader name="writer">
    <value>System.Resources.ResXResourceWriter, System.Windows.Forms, Version=4.0.0.0, Culture=neutral, PublicKeyToken=b77a5c561934e089</value>
  </resheader>
  <metadata name="timer1.TrayLocation" type="System.Drawing.Point, System.Drawing, Version=4.0.0.0, Culture=neutral, PublicKeyToken=b03f5f7f11d50a3a">
    <value>17, 17</value>
  </metadata>
  <metadata name="$this.TrayHeight" type="System.Int32, mscorlib, Version=4.0.0.0, Culture=neutral, PublicKeyToken=b77a5c561934e089">
    <value>38</value>
  </metadata>
  <assembly alias="System.Drawing" name="System.Drawing, Version=4.0.0.0, Culture=neutral, PublicKeyToken=b03f5f7f11d50a3a" />
  <data name="$this.Icon" type="System.Drawing.Icon, System.Drawing" mimetype="application/x-microsoft.net.object.bytearray.base64">
    <value>
        AAABAAMAEBAAAAAAAABoBQAANgAAACAgAAAAAAAAqAgAAJ4FAAAwMAAAAAAAAKgOAABGDgAAKAAAABAA
        AAAgAAAAAQAIAAAAAABAAQAAAAAAAAAAAAAAAQAAAAAAAAAAAAAAAIAAAIAAAACAgACAAAAAgACAAICA
        AADAwMAAwNzAAPDKpgDU8P8AseL/AI7U/wBrxv8ASLj/ACWq/wAAqv8AAJLcAAB6uQAAYpYAAEpzAAAy
        UADU4/8Ascf/AI6r/wBrj/8ASHP/ACVX/wAAVf8AAEncAAA9uQAAMZYAACVzAAAZUADU1P8AsbH/AI6O
        /wBra/8ASEj/ACUl/wAAAP4AAADcAAAAuQAAAJYAAABzAAAAUADj1P8Ax7H/AKuO/wCPa/8Ac0j/AFcl
        /wBVAP8ASQDcAD0AuQAxAJYAJQBzABkAUADw1P8A4rH/ANSO/wDGa/8AuEj/AKol/wCqAP8AkgDcAHoA
        uQBiAJYASgBzADIAUAD/1P8A/7H/AP+O/wD/a/8A/0j/AP8l/wD+AP4A3ADcALkAuQCWAJYAcwBzAFAA
        UAD/1PAA/7HiAP+O1AD/a8YA/0i4AP8lqgD/AKoA3ACSALkAegCWAGIAcwBKAFAAMgD/1OMA/7HHAP+O
        qwD/a48A/0hzAP8lVwD/AFUA3ABJALkAPQCWADEAcwAlAFAAGQD/1NQA/7GxAP+OjgD/a2sA/0hIAP8l
        JQD+AAAA3AAAALkAAACWAAAAcwAAAFAAAAD/49QA/8exAP+rjgD/j2sA/3NIAP9XJQD/VQAA3EkAALk9
        AACWMQAAcyUAAFAZAAD/8NQA/+KxAP/UjgD/xmsA/7hIAP+qJQD/qgAA3JIAALl6AACWYgAAc0oAAFAy
        AAD//9QA//+xAP//jgD//2sA//9IAP//JQD+/gAA3NwAALm5AACWlgAAc3MAAFBQAADw/9QA4v+xANT/
        jgDG/2sAuP9IAKr/JQCq/wAAktwAAHq5AABilgAASnMAADJQAADj/9QAx/+xAKv/jgCP/2sAc/9IAFf/
        JQBV/wAASdwAAD25AAAxlgAAJXMAABlQAADU/9QAsf+xAI7/jgBr/2sASP9IACX/JQAA/gAAANwAAAC5
        AAAAlgAAAHMAAABQAADU/+MAsf/HAI7/qwBr/48ASP9zACX/VwAA/1UAANxJAAC5PQAAljEAAHMlAABQ
        GQDU//AAsf/iAI7/1ABr/8YASP+4ACX/qgAA/6oAANySAAC5egAAlmIAAHNKAABQMgDU//8Asf//AI7/
        /wBr//8ASP//ACX//wAA/v4AANzcAAC5uQAAlpYAAHNzAABQUADy8vIA5ubmANra2gDOzs4AwsLCALa2
        tgCqqqoAnp6eAJKSkgCGhoYAenp6AG5ubgBiYmIAVlZWAEpKSgA+Pj4AMjIyACYmJgAaGhoADg4OAPD7
        /wCkoKAAgICAAAAA/wAA/wAAAP//AP8AAAD/AP8A//8AAP///wAAAAAAAADr6+vr6+vs7gAAAPj4+Pj4
        9+f35wf3+O7uAAAH9+fn5+fn6uz49/ju7u4A5Om15+fnBwfn9/fq7u7uAOQHB+f36vju7u7u7u7u7gAA
        AOrk9/j4+Pj4+O7s7O4ABwcHBwfn5+fntff47gAAAOQHe3uLi4uLi4v3+O4AAADkB3vr6+vr64uL9/ju
        7gAA5Ad76+Tk5Orui/f47u4AAOQHe+vk5OTq7ov3+O7u7gDkB3ttbW1tbe6L9/ju7u4A5Ad7e2dnZ2dn
        i/f47u7uAOQHe3t7e3uLi4v3+O7u7gDkB+rq6urq6urq9/ju7uwABwcHBwcHBwcH5+fq7OwA/AP//4AB
        //+AAP//gAD//4AA///gAP//gAP//4AD//+AAf//gAH//4AA//+AAP//gAD//4AA//+AAP//gAH//ygA
        AAAgAAAAQAAAAAEACAAAAAAAgAQAAAAAAAAAAAAAAAEAAAAAAAAAAAAAAACAAACAAAAAgIAAgAAAAIAA
        gACAgAAAwMDAAMDcwADwyqYA1PD/ALHi/wCO1P8Aa8b/AEi4/wAlqv8AAKr/AACS3AAAerkAAGKWAABK
        cwAAMlAA1OP/ALHH/wCOq/8Aa4//AEhz/wAlV/8AAFX/AABJ3AAAPbkAADGWAAAlcwAAGVAA1NT/ALGx
        /wCOjv8Aa2v/AEhI/wAlJf8AAAD+AAAA3AAAALkAAACWAAAAcwAAAFAA49T/AMex/wCrjv8Aj2v/AHNI
        /wBXJf8AVQD/AEkA3AA9ALkAMQCWACUAcwAZAFAA8NT/AOKx/wDUjv8Axmv/ALhI/wCqJf8AqgD/AJIA
        3AB6ALkAYgCWAEoAcwAyAFAA/9T/AP+x/wD/jv8A/2v/AP9I/wD/Jf8A/gD+ANwA3AC5ALkAlgCWAHMA
        cwBQAFAA/9TwAP+x4gD/jtQA/2vGAP9IuAD/JaoA/wCqANwAkgC5AHoAlgBiAHMASgBQADIA/9TjAP+x
        xwD/jqsA/2uPAP9IcwD/JVcA/wBVANwASQC5AD0AlgAxAHMAJQBQABkA/9TUAP+xsQD/jo4A/2trAP9I
        SAD/JSUA/gAAANwAAAC5AAAAlgAAAHMAAABQAAAA/+PUAP/HsQD/q44A/49rAP9zSAD/VyUA/1UAANxJ
        AAC5PQAAljEAAHMlAABQGQAA//DUAP/isQD/1I4A/8ZrAP+4SAD/qiUA/6oAANySAAC5egAAlmIAAHNK
        AABQMgAA///UAP//sQD//44A//9rAP//SAD//yUA/v4AANzcAAC5uQAAlpYAAHNzAABQUAAA8P/UAOL/
        sQDU/44Axv9rALj/SACq/yUAqv8AAJLcAAB6uQAAYpYAAEpzAAAyUAAA4//UAMf/sQCr/44Aj/9rAHP/
        SABX/yUAVf8AAEncAAA9uQAAMZYAACVzAAAZUAAA1P/UALH/sQCO/44Aa/9rAEj/SAAl/yUAAP4AAADc
        AAAAuQAAAJYAAABzAAAAUAAA1P/jALH/xwCO/6sAa/+PAEj/cwAl/1cAAP9VAADcSQAAuT0AAJYxAABz
        JQAAUBkA1P/wALH/4gCO/9QAa//GAEj/uAAl/6oAAP+qAADckgAAuXoAAJZiAABzSgAAUDIA1P//ALH/
        /wCO//8Aa///AEj//wAl//8AAP7+AADc3AAAubkAAJaWAABzcwAAUFAA8vLyAObm5gDa2toAzs7OAMLC
        wgC2trYAqqqqAJ6engCSkpIAhoaGAHp6egBubm4AYmJiAFZWVgBKSkoAPj4+ADIyMgAmJiYAGhoaAA4O
        DgDw+/8ApKCgAICAgAAAAP8AAP8AAAD//wD/AAAA/wD/AP//AAD///8AAAAAAAAAAAAAAAAAAAAAAAAA
        7u7u7u7u7gAAAAAAAAAAAAAAAAAAAAAAAADu7u7u7u749/f39/fu7u4AAAAAAAAAAAAAAO7u7u7u7vj3
        9/f39+fn5+fn5+7u7u7uAAAAAO7u7u7u+Pf39/f39+fn5+cHBwcH9/fn7u7u7u7u7gAAB/f39+fn5+fn
        5+fn5+f4+Ozu7vj4+Oru7u7u7u7uAADjB+fn5+fn5+fn5+fn5+rq+Pj46ufn5+7u7u7u7u4AAOMH56+v
        5+fn5+fn5+fn5+fn5+fn5wfn7u7u7u7u7gAA4wfnq6vn5+fn5+cHB+Tk5Afn5/fq6urq7u7u7u7uAADj
        B+fn5wfk5OTk5Orq+Ozs7u7u7u7u7Ozs7u7u7u4AAOTk5OTk5/f47Ozs7Ozu7u7u7u7u7u7u7u7s7O7u
        7gAAAAAA5OTk5Of3+O7u7u7u7u7u7u7u7u7u7u7s7OzuAAAAAAAAAADk5AcH5+rq9+rq6urq6vf39+7u
        AAAAAAAAAAAH5+fn5+fn5+fn5wfn5+fn56ur9/fq7uwAAAAAAAAAAOQHBwcHBwcHBwfnBwcHB+fn5/f3
        9+ru7gAAAAAAAAAA5Afn5+f39/f3+PiLi4uLi4uLi4v36u7u7gAAAAAAAADkB4t7e3t7e3uLi4uLi4uL
        i4uLi/f37u7uAAAAAAAAAOQHi3t76/j4+Pj4+Pj4+PiLi4uL9+ru7u4AAAAAAAAA5AeLe3vr5OTk5OTk
        5OTk+IuLi4v36u7u7u4AAAAAAADkB4t7e+vk5OTk5OTk5OT47ouLi/f37u7u7gAAAAAAAOQHi3t76+Tk
        5OTk5OTk5Pjui4uL9+ru7u7u7gAAAAAA5AeLe3vr5OTk5OTk5OTk+O6Li4v35+7u7u7u7gAAAADkB4t7
        e+vk/+Tk5OTk5OT47ouLi/f37u7u7u7uAAAAAOQHi3t76//k/+Tk/+Tk5Pjui4uL9+fu7u7u7u4AAAAA
        5AeLe3ttbW1tbW1tbW1t+O6Li4v39+7u7u7u7gAAAADkB4t7e+3t7e3t7e3t7e347ouLi/fn7u7u7u7u
        AAAAAOQHi3t7e+7nBwfnBwcHB/fue4uL5/fu7u7u7u4AAAAA5AeLe3t77u3t7e3t7e3t7e57i4vn5+7u
        7u7u7gAAAADkB4t7e3tnZ2dnZ2dnZ2dn7nuLi/f37u7u7u7uAAAAAOQHi3t7e3t7e3t7i4uLi4uLi4uL
        6ufu7u7u7u4AAAAA5Afq6urq6urq6urq6urq6urq6urn9+7u7u7u7gAAAADk5OTk5OTk5OTkBwcHBwcH
        5+fn5+fn7u7r6+sAAAAAAOTk5OTk5OTk5OTk5OQHBwcHBwcHBwf4+AAAAAAAAP//wH//8AAf/AAAB4AA
        AAGAAAABgAAAAYAAAAGAAAABgAAAAYAAAAHwAAAB/gAAP8AAAD/AAAA/wAAAH8AAAB/AAAAfwAAAD8AA
        AA/AAAAHwAAAA8AAAAPAAAADwAAAA8AAAAPAAAADwAAAA8AAAAPAAAADwAAAA8AAAAfAAAA/KAAAADAA
        AABgAAAAAQAIAAAAAACACgAAAAAAAAAAAAAAAQAAAAAAAAAAAAAAAIAAAIAAAACAgACAAAAAgACAAICA
        AADAwMAAwNzAAPDKpgDU8P8AseL/AI7U/wBrxv8ASLj/ACWq/wAAqv8AAJLcAAB6uQAAYpYAAEpzAAAy
        UADU4/8Ascf/AI6r/wBrj/8ASHP/ACVX/wAAVf8AAEncAAA9uQAAMZYAACVzAAAZUADU1P8AsbH/AI6O
        /wBra/8ASEj/ACUl/wAAAP4AAADcAAAAuQAAAJYAAABzAAAAUADj1P8Ax7H/AKuO/wCPa/8Ac0j/AFcl
        /wBVAP8ASQDcAD0AuQAxAJYAJQBzABkAUADw1P8A4rH/ANSO/wDGa/8AuEj/AKol/wCqAP8AkgDcAHoA
        uQBiAJYASgBzADIAUAD/1P8A/7H/AP+O/wD/a/8A/0j/AP8l/wD+AP4A3ADcALkAuQCWAJYAcwBzAFAA
        UAD/1PAA/7HiAP+O1AD/a8YA/0i4AP8lqgD/AKoA3ACSALkAegCWAGIAcwBKAFAAMgD/1OMA/7HHAP+O
        qwD/a48A/0hzAP8lVwD/AFUA3ABJALkAPQCWADEAcwAlAFAAGQD/1NQA/7GxAP+OjgD/a2sA/0hIAP8l
        JQD+AAAA3AAAALkAAACWAAAAcwAAAFAAAAD/49QA/8exAP+rjgD/j2sA/3NIAP9XJQD/VQAA3EkAALk9
        AACWMQAAcyUAAFAZAAD/8NQA/+KxAP/UjgD/xmsA/7hIAP+qJQD/qgAA3JIAALl6AACWYgAAc0oAAFAy
        AAD//9QA//+xAP//jgD//2sA//9IAP//JQD+/gAA3NwAALm5AACWlgAAc3MAAFBQAADw/9QA4v+xANT/
        jgDG/2sAuP9IAKr/JQCq/wAAktwAAHq5AABilgAASnMAADJQAADj/9QAx/+xAKv/jgCP/2sAc/9IAFf/
        JQBV/wAASdwAAD25AAAxlgAAJXMAABlQAADU/9QAsf+xAI7/jgBr/2sASP9IACX/JQAA/gAAANwAAAC5
        AAAAlgAAAHMAAABQAADU/+MAsf/HAI7/qwBr/48ASP9zACX/VwAA/1UAANxJAAC5PQAAljEAAHMlAABQ
        GQDU//AAsf/iAI7/1ABr/8YASP+4ACX/qgAA/6oAANySAAC5egAAlmIAAHNKAABQMgDU//8Asf//AI7/
        /wBr//8ASP//ACX//wAA/v4AANzcAAC5uQAAlpYAAHNzAABQUADy8vIA5ubmANra2gDOzs4AwsLCALa2
        tgCqqqoAnp6eAJKSkgCGhoYAenp6AG5ubgBiYmIAVlZWAEpKSgA+Pj4AMjIyACYmJgAaGhoADg4OAPD7
        /wCkoKAAgICAAAAA/wAA/wAAAP//AP8AAAD/AP8A//8AAP///wAAAAAAAAAAAAAAAAAAAAAAAAAAAAAA
        AAAAAAAAAAAAAAAAAAAAAAAAAAAAAAAAAAAAAAAAAAAAAAAAAAAAAAAAAAAAAAAAAAAAAAAAAAAAAAAA
        AAAAAAAAAAAAAAAAAAAAAAAAAAAAAAAAAAAAAAAAAAAAAAAAAAAAAAAAAADu7u7u7u4AAAAAAAAAAAAA
        AAAAAAAAAAAAAAAAAAAAAAAAAAAAAAAAAO7u7u7u7u749/f39+7u7gAAAAAAAAAAAAAAAAAAAAAAAAAA
        AAAAAADu7u7u7u7u7vj39/f39/fn5+fn5+7u7u7uAAAAAAAAAAAAAAAAAAAAAO7u7u7u7u749/f39/f3
        9+fn5+fn5+fn5+fn5+7u7u7u7u4AAAAAAAAAAAAA7u7u7vj39/f39/fn5+fn5+fn5+fn5+fn5+fn5+fn
        5+7u7u7u7u7u7gAAAAAAAAAAB/f39+fn5+fn5+fn5+fn5+fn5+fnBwcHBwcH6urq5+7u7u7u7u7u7gAA
        AAAAAAAA4wfn5+fn5+fn5+fn5+fn5+fn5+vr6+7u7u736+vr5+7u7u7u7u7u7gAAAAAAAAAA4wfn5+fn
        5+fn5+fn5+fn5+fn5+rq6+vr6+vq5+fn5+7u7u7u7u7u7gAAAAAAAAAA4wfnr6+v5+fn5+fn5+fn5+fn
        5+fn5+fn5+fn5+fn5+7u7u7u7u7u7gAAAAAAAAAA4wfnq6uv5+fn5+fn5+fn5+fn5+fn5+cHBwcHBwcH
        B+7u7u7u7u7u7gAAAAAAAAAA4wfn5+fn5+fn5+fn5+cHBwcHBwcHBwfn5+fq6urq6uru7u7u7u7u7gAA
        AAAAAAAA4wfn5+fnBwfl5QcHBwfq6ur4+Ozs7u7u7u7u7u7s7Ozs7O7u7u7u7gAAAAAAAAAA5OPk5OTk
        5/fq6+zs7Ozs7Ozs7u7u7u7u7u7u7u7u7uzs7Ozs7u7u7gAAAAAAAAAAAADk5OTk5Af36uvs7Ozs7O7u
        7u7u7u7u7u7u7u7u7u7u7uzs7Ozu7gAAAAAAAAAAAAAAAADk5OTkB+r3+Ozu7u7u7u7u7u7u7u7u7u7u
        7u7u7u7s7Ozs7gAAAAAAAAAAAAAAAAAAAADk5OQHB+f36urq6urq6urq6ur39/f36u7uAAAAAAAAAAAA
        AAAAAAAAAOfn5+fn5+fn5+fn5+fn5+fn5+fn5+fn9/f39/f36u7u7gAAAAAAAAAAAAAAAAAAAOTl5QcH
        BwcHBwcHBwcH5+fn5+fn5+fn9/r69/f36u7u7gAAAAAAAAAAAAAAAAAAAOQHBwcHBwcHBwcHBwcHBwcH
        BwcHB+fn5/f39/f36u7u7gAAAAAAAAAAAAAAAAAAAOQHB+fn5+f39/f39+vr6+t7i4uLi4uLi4uLi/f3
        6u7u7u4AAAAAAAAAAAAAAAAAAOTlB4t7e3t7e3t7e4uLi4uLi4uLi4uLi4uLi/f36u7u7u4AAAAAAAAA
        AAAAAAAAAOTlB4t7e3t7e3t7e4uLi4uLi4uLi4uLi4uLi/f36u7u7u4AAAAAAAAAAAAAAAAAAOTlB4t7
        e3vr6+vr6+vr6+vr6+vr64uLi4uLi/f36u7u7u4AAAAAAAAAAAAAAAAAAOTkB4t7e3vr5OTk5OTk5OTk
        5OTk64uLi4uLi/f36u7u7u7uAAAAAAAAAAAAAAAAAOTkB4t7e3vr5OTk5OTk5OTk5OTk6+7ui4uLi/f3
        6u7u7u7uAAAAAAAAAAAAAAAAAOPkB4t7e3vr5OTk5OTk5OTk5OTk6/fui4uLi/f39+7u7u7u7gAAAAAA
        AAAAAAAAAOPkB4t7e3vr5OTk5OTk5OTk5OTk6/fui4uLi/f39+7u7u7u7gAAAAAAAAAAAAAAAOPkB4t7
        e3vr5OTk5OTk5OTk5OTk6/fui4uLi/fn9+7u7u7u7u4AAAAAAAAAAAAAAOPkB4t7e3vr5OTk5OTk5OTk
        5OTk6/fui4uLi/fn9+7u7u7u7u4AAAAAAAAAAAAAAOPkB4t7e3vr5OTk5OTk5OTk5OTk6/fui4uLi/fn
        9+7u7u7u7u4AAAAAAAAAAAAAAOTkB4t7e3vr5OTk5OTk5OTk5OTk6/fui4uLi/fn9+7u7u7u7u4AAAAA
        AAAAAAAAAOTkB4t7e3vr5eXl5eXl5eXl5eXl6/fui4uLi/fn9+7u7u7u7u4AAAAAAAAAAAAAAOTkB4t7
        e3ttbW1tbW1tbW1tbW1t6/fui4uLi/fn9+7u7u7u7u4AAAAAAAAAAAAAAOTkB4t7e3vt7e3t7e3t7e3t
        7e3t6/fui4uLi+fn9+7u7u7u7u4AAAAAAAAAAAAAAOTkB4t7e3t7e+4HBwcHBwcHBwcH9/fue4uLi+fn
        9+7u7u7u7u4AAAAAAAAAAAAAAOTkB4t7e3t7e+3t7e3t7e3t7e3t7e3ue4uLi+fn9+7u7u7u7u4AAAAA
        AAAAAAAAAOPkB4t7e3t7e2dnZ2dnZ2dnZ2dnZ2fue3uLi/fn9+7u7u7u7u4AAAAAAAAAAAAAAOPkB4t7
        e3t7e3t7e3uLi4uLi4uLi4uLi4uLi/fn9+7u7u7u7u4AAAAAAAAAAAAAAOPk5Yt7e3t7e3t7e3t7e4uL
        i4uLi4uLi4uLi/fn9+7u7u7u7u4AAAAAAAAAAAAAAOPk5erq6urq6urq6urq6urq6urq6urq6urq6ufn
        9+7u7u7u7u4AAAAAAAAAAAAAAOPk5OTk5OTk5OTk5OTl5QcHBwcHBwfn5+fn5+fn9+7u7u7r6wAAAAAA
        AAAAAAAAAOPk5OTk5OTk5OTk5OTl5QcHBwcHBwcH5+fn5+fn5+7u6+sAAAAAAAAAAAAAAAAAAOPk5OTk
        5OTk5OTk5OTk5OTk5OXlBwcHBwcHBwcHB+vrAAAAAAAAAAAAAAAAAAAAAAAAAAAAAAAAAAAAAAAAAAAA
        AAAAAAAAAAAAAAAAAAAAAAAAAAAAAAAAAAAAAAAAAAAAAAAAAAAAAAAAAAAAAAAAAAAAAAAAAAAAAAAA
        AAAAAAAAAAAAAAAAAAAAAAAAAAAAAAAAAAAAAAAAAAAAAAAAAAAAAAAAAAAAAAAAAAAAAAAAAAAAAAAA
        AAD//////////////////////////A////////4AA//////+AAAA/////wAAAAA////wAAAAAA////AA
        AAAAD///8AAAAAAP///wAAAAAA////AAAAAAD///8AAAAAAP///wAAAAAA////AAAAAAD///8AAAAAAP
        ///8AAAAAA////+AAAAAD/////AAAAf////4AAAAA/////gAAAAD////+AAAAAP////4AAAAAf////gA
        AAAB////+AAAAAH////4AAAAAf////gAAAAA////+AAAAAD////4AAAAAH////gAAAAAf///+AAAAAA/
        ///4AAAAAD////gAAAAAP///+AAAAAA////4AAAAAD////gAAAAAP///+AAAAAA////4AAAAAD////gA
        AAAAP///+AAAAAA////4AAAAAD////gAAAAAP///+AAAAAA////4AAAAAH////gAAAAB////+AAAAAf/
        //////////////////////////////////8=
</value>
  </data>
</root>
