# Supplementary material
Source: MDPI journal article supplement (https://www.mdpi.com/2077-1312/10/8/1051)
Supplement: s1 [file s1 › OSNSystem/OSNSystem/OSNSystem/commandExecuteDO.cs]

using System;
using System.Collections.Generic;
using System.Linq;
using System.Text;

namespace OSNSystem
{
    class commandExecuteDO
    {
    }
}
