# Supplementary material
Source: MDPI journal article supplement (https://www.mdpi.com/2077-1312/10/8/1051)
Supplement: s1 [file s1 › OSNSystem/OSNSystem/OSNSystem/dataManager.xml]

<DatabaseInfo>
  <Database>
    <DataBaseIP>127.0.0.1</DataBaseIP>
    <DataBaseName>oceandata</DataBaseName>
    <userName>root</userName>
    <PassWord>sdioi</PassWord>
  </Database>
</DatabaseInfo>
