# Supplementary material
Source: MDPI journal article supplement (https://www.mdpi.com/2077-1312/10/8/1051)
Supplement: s1 [file s1 › OSNSystem/OSNSystem/OSNSystem/draw.cs]

/*
 * 时间：2017年5月8日14:07:06
 * 功能：为后面图片label标签显示方便，添加一些静态全局变量，想到好的方法的时候去掉
 * 
 */
using System;
using System.Collections.Generic;
using System.Linq;
using System.Text;
using System.Collections;
using System.Data;

namespace OSNSystem
{
    class draw
    {
        ////各个传感器数据存储的可变数组
        //public static ArrayList arrayDataDO = new ArrayList();
        //public static ArrayList arrayDataJW = new ArrayList();
        //public static ArrayList arrayDataYLS = new ArrayList();
        //public static ArrayList arrayDataZD = new ArrayList();
        //public static ArrayList arrayDataCDOM = new ArrayList();

        ////传感器采集值对应的采集时间
        //public static ArrayList arraySaveDateDO = new ArrayList();
        //public static ArrayList arraySaveDateJW = new ArrayList();
        //public static ArrayList arraySaveDateYLS = new ArrayList();
        //public static ArrayList arraySaveDateZD = new ArrayList();
        //public static ArrayList arraySaveDateCDOM = new ArrayList();

        ////各个通道存储的电压以及电流的可变数组
        //public static ArrayList arrayCurrentDO = new ArrayList();
        //public static ArrayList arrayCurrentJW = new ArrayList();
        //public static ArrayList arrayCurrentYLS = new ArrayList();
        //public static ArrayList arrayCurrentZD = new ArrayList();
        //public static ArrayList arrayCurrentCDOM = new ArrayList();

        //public static ArrayList arrayVoltageDO = new ArrayList();
        //public static ArrayList arrayVoltageJW = new ArrayList();
        //public static ArrayList arrayVoltageYLS = new ArrayList();
        //public static ArrayList arrayVoltageZD = new ArrayList();
        //public static ArrayList arrayVoltageCDOM = new ArrayList();

        ////各个通道电压以及电流对应的采集时间
        //public static ArrayList arrayStatusSaveDateDO = new ArrayList();
        //public static ArrayList arrayStatusSaveDateJW = new ArrayList();
        //public static ArrayList arrayStatusSaveDateYLS = new ArrayList();
        //public static ArrayList arrayStatusSaveDateZD = new ArrayList();
        //public static ArrayList arrayStatusSaveDateCDOM = new ArrayList();

        //为了将状态数据上传至数据库服务器，定义的可变数组
        public static ArrayList arrayTemp = new ArrayList();
        public static ArrayList arraySaveDateTemp = new ArrayList();


        //接驳盒项目增添的变量 2017-09-26

        public static ArrayList arrayACh1Vol = new ArrayList();
        public static ArrayList arrayACh1Cur = new ArrayList();

        public static ArrayList arrayACh2Vol = new ArrayList();
        public static ArrayList arrayACh2Cur = new ArrayList();

        public static ArrayList arrayACh3Vol = new ArrayList();
        public static ArrayList arrayACh3Cur = new ArrayList();


        public static ArrayList arrayACh4Vol = new ArrayList();
        public static ArrayList arrayACh4Cur = new ArrayList();


        public static ArrayList arrayACh5Vol = new ArrayList();
        public static ArrayList arrayACh5Cur = new ArrayList();


        public static ArrayList arrayATemp = new ArrayList();

        public static ArrayList arrayACollectDate = new ArrayList();

        
        

        //2020年11月10日15:24:44-主接驳盒高压舱电源电参数画图使用的可变数组定义
        public static ArrayList arrayHCh0Vol = new ArrayList();//主接驳盒前端电压可变数组
        public static ArrayList arrayHCh0Cur = new ArrayList();//主接驳盒前端电流可变数组

        public static ArrayList arrayHCh1Vol = new ArrayList();//主接驳盒后端1路电压可变数组
        public static ArrayList arrayHCh1Cur = new ArrayList();//主接驳盒后端1路电流可变数组

        public static ArrayList arrayHCh2Vol = new ArrayList();//主接驳盒后端2路电压可变数组
        public static ArrayList arrayHCh2Cur = new ArrayList();//主接驳盒后端2路电流可变数组

        public static ArrayList arrayHTemp = new ArrayList();//主接驳盒舱内温度的可变数组


        public static ArrayList arrayHSaveDate = new ArrayList();//主接驳盒高压舱保存时间


        //2020年11月13日16:03:11-次接驳盒低压舱状态参数使用的可变数组定义
        public static ArrayList arrayLCh1Vol = new ArrayList();//次接驳盒低压舱通道1电压可变数组
        public static ArrayList arrayLCh1Cur = new ArrayList();//次接驳盒低压舱通道1电流可变数组

        public static ArrayList arrayLCh2Vol = new ArrayList();//次接驳盒低压舱通道2电压可变数组
        public static ArrayList arrayLCh2Cur = new ArrayList();//次接驳盒低压舱通道2电流可变数组

        public static ArrayList arrayLCh3Vol = new ArrayList();//次级接驳盒低压舱通道3电压可变数组
        public static ArrayList arrayLCh3Cur = new ArrayList();//次级接驳盒低压舱通道3电流可变数组

        public static ArrayList arrayLCh4Vol = new ArrayList();//次级接驳盒低压舱通道4电压可变数组
        public static ArrayList arrayLCh4Cur = new ArrayList();//次级接驳盒低压舱通道4电流可变数组

        public static ArrayList arrayLCh5Vol = new ArrayList();//次级接驳盒低压舱通道5电压可变数组
        public static ArrayList arrayLCh5Cur = new ArrayList();//次级接驳盒低压舱通道5电流可变数组

        public static ArrayList arrayLTemp = new ArrayList();//次接驳盒舱内温度的可变数组

        public static ArrayList arrayLSaveDate = new ArrayList();//次接驳盒低压舱保存时间


        /***********************************************************************************/
        
        public static ArrayList arrayBCh1Vol = new ArrayList();
        public static ArrayList arrayBCh1Cur = new ArrayList();
        public static ArrayList arrayBCh2Vol = new ArrayList();
        public static ArrayList arrayBCh2Cur = new ArrayList();
        public static ArrayList arrayBTemp = new ArrayList();
        public static ArrayList arrayBCollectDate = new ArrayList();
 

        //2018-01-30新增变量  为了显示传感器图形控件增加的变量
        public static ArrayList arrayDOValue = new ArrayList();//山仪所溶解氧采集值
        public static ArrayList arrayDODate = new ArrayList();//山仪所溶解氧采集时间


        public static ArrayList arrayChlValue = new ArrayList();//叶绿素采集值
        public static ArrayList arrayTurValue = new ArrayList();//浊度采集值
        public static ArrayList arrayCTTemp = new ArrayList();//叶绿素浊度传感器测量的温度值


        public static ArrayList arrayChlTurDate = new ArrayList();//叶绿素浊度采集时间，两个传感器共用一个采集时间


        public static ArrayList arrayADLValue = new ArrayList();//PH采集值
        public static ArrayList arrayADLDate = new ArrayList();//PH采集时间

        public static ArrayList arrayCTD_CValue = new ArrayList();//CTD采集值-电导率值
        public static ArrayList arrayCTD_TValue = new ArrayList();//CTD采集值-温度值
        public static ArrayList arrayCTD_DValue = new ArrayList();//CTD采集值-深度值
        public static ArrayList arrayCTD_SValue = new ArrayList();//CTD采集值-盐度值

        public static ArrayList arrayCTDDate = new ArrayList();//CTD采集时间


        public static ArrayList arrayM_ChlValue = new ArrayList();//多参数采集值-叶绿素数据
        public static ArrayList arrayM_TurValue = new ArrayList();//多参数采集值-浊度数据
        public static ArrayList arrayM_PhyValue = new ArrayList();//多参数采集值-藻红蛋白数据

        public static ArrayList arrayMultiDate = new ArrayList();//多参数传感器的采集时间


        public static ArrayList arrayCDOMValue = new ArrayList();//CDOM采集值
        public static ArrayList arrayCDOMDate = new ArrayList();//CDOM采集时间


        //将数据采集器添加到动态数组中
        public static ArrayList arrayDCCh1Vol = new ArrayList();//数据采集器通道1电压动态数组
        public static ArrayList arrayDCCh2Vol = new ArrayList();//数据采集器通道2电压动态数组
        public static ArrayList arrayDCCh3Vol = new ArrayList();//数据采集器通道3电压动态数组
        public static ArrayList arrayDCCh4Vol = new ArrayList();//数据采集器通道4电压动态数组
        public static ArrayList arrayDCCh5Vol = new ArrayList();//数据采集器通道5电压动态数组

        public static ArrayList arrayDCCh1Cur = new ArrayList();//数据采集器通道1电流动态数组
        public static ArrayList arrayDCCh2Cur = new ArrayList();//数据采集器通道2电流动态数组
        public static ArrayList arrayDCCh3Cur = new ArrayList();//数据采集器通道3电流动态数组
        public static ArrayList arrayDCCh4Cur = new ArrayList();//数据采集器通道4电流动态数组
        public static ArrayList arrayDCCh5Cur = new ArrayList();//数据采集器通道5电流动态数组


        public static ArrayList arrayDCTemp = new ArrayList();//数组采集器舱内温度动态数组


        /// <summary>
        /// 将温度参数放入动态增加的数组中,为了将温度状态数据上传至数据库服务器
        /// </summary>
        /// <param name="sql"></param>
        /// <param name="f"></param>
        /// <param name="j"></param>
        public static void addTemp(string sql, Main f)
        {
            try
            {


                DataTable tempTable = SqlHelper.ExecuteDataTable(sql);

                for (int i = 0; i < tempTable.Rows.Count; i++)
                {
                    DataRow row = tempTable.Rows[i];

                    arrayTemp.Add(Convert.ToDouble(row["statusdata"].ToString().Replace("+", "")));
                    arraySaveDateTemp.Add(Convert.ToString(row["collectdate"]));

                }

            }
            catch (Exception exp)
            {
                //MessageBox.Show("画采集值图出现异常！"+exp.Message);
                LogClass.WriteLogFile("load中取温度值异常！" + exp.Message);
            }


        }


    }
}
