# Supplementary material
Source: MDPI journal article supplement (https://www.mdpi.com/2077-1312/10/8/1051)
Supplement: s1 [file s1 › OSNSystem/OSNSystem/OSNSystem/Main.Designer.cs]

namespace OSNSystem
{
    partial class Main
    {
        /// <summary>
        /// 必需的设计器变量。
        /// </summary>
        private System.ComponentModel.IContainer components = null;

        /// <summary>
        /// 清理所有正在使用的资源。
        /// </summary>
        /// <param name="disposing">如果应释放托管资源，为 true；否则为 false。</param>
        protected override void Dispose(bool disposing)
        {
            if (disposing && (components != null))
            {
                components.Dispose();
            }
            base.Dispose(disposing);
        }

        #region Windows 窗体设计器生成的代码

        /// <summary>
        /// 设计器支持所需的方法 - 不要
        /// 使用代码编辑器修改此方法的内容。
        /// </summary>
        private void InitializeComponent()
        {
            this.components = new System.ComponentModel.Container();
            System.ComponentModel.ComponentResourceManager resources = new System.ComponentModel.ComponentResourceManager(typeof(Main));
            System.Windows.Forms.DataGridViewCellStyle dataGridViewCellStyle16 = new System.Windows.Forms.DataGridViewCellStyle();
            System.Windows.Forms.DataGridViewCellStyle dataGridViewCellStyle17 = new System.Windows.Forms.DataGridViewCellStyle();
            System.Windows.Forms.DataGridViewCellStyle dataGridViewCellStyle18 = new System.Windows.Forms.DataGridViewCellStyle();
            System.Windows.Forms.DataGridViewCellStyle dataGridViewCellStyle19 = new System.Windows.Forms.DataGridViewCellStyle();
            System.Windows.Forms.DataGridViewCellStyle dataGridViewCellStyle20 = new System.Windows.Forms.DataGridViewCellStyle();
            System.Windows.Forms.DataGridViewCellStyle dataGridViewCellStyle21 = new System.Windows.Forms.DataGridViewCellStyle();
            System.Windows.Forms.DataGridViewCellStyle dataGridViewCellStyle22 = new System.Windows.Forms.DataGridViewCellStyle();
            System.Windows.Forms.DataGridViewCellStyle dataGridViewCellStyle23 = new System.Windows.Forms.DataGridViewCellStyle();
            System.Windows.Forms.DataGridViewCellStyle dataGridViewCellStyle24 = new System.Windows.Forms.DataGridViewCellStyle();
            System.Windows.Forms.DataGridViewCellStyle dataGridViewCellStyle25 = new System.Windows.Forms.DataGridViewCellStyle();
            System.Windows.Forms.DataGridViewCellStyle dataGridViewCellStyle26 = new System.Windows.Forms.DataGridViewCellStyle();
            System.Windows.Forms.DataGridViewCellStyle dataGridViewCellStyle27 = new System.Windows.Forms.DataGridViewCellStyle();
            System.Windows.Forms.DataGridViewCellStyle dataGridViewCellStyle28 = new System.Windows.Forms.DataGridViewCellStyle();
            System.Windows.Forms.DataGridViewCellStyle dataGridViewCellStyle29 = new System.Windows.Forms.DataGridViewCellStyle();
            System.Windows.Forms.DataGridViewCellStyle dataGridViewCellStyle30 = new System.Windows.Forms.DataGridViewCellStyle();
            this.statusStrip1 = new System.Windows.Forms.StatusStrip();
            this.toolStripStatusLabel1 = new System.Windows.Forms.ToolStripStatusLabel();
            this.toolStripStatusLabel2 = new System.Windows.Forms.ToolStripStatusLabel();
            this.systemTime = new System.Windows.Forms.ToolStripStatusLabel();
            this.pnlTop = new System.Windows.Forms.Panel();
            this.pictureBox1 = new System.Windows.Forms.PictureBox();
            this.sysTimer = new System.Windows.Forms.Timer(this.components);
            this.tabPage5 = new System.Windows.Forms.TabPage();
            this.TabLPnlStatus = new System.Windows.Forms.TableLayoutPanel();
            this.pnlACh1C = new System.Windows.Forms.Panel();
            this.button9 = new System.Windows.Forms.Button();
            this.lblACh1B = new System.Windows.Forms.Label();
            this.lblACh1 = new System.Windows.Forms.Label();
            this.picACh1 = new Steema.TeeChart.TChart();
            this.line18 = new Steema.TeeChart.Styles.Line();
            this.line24 = new Steema.TeeChart.Styles.Line();
            this.pnlACh2V = new System.Windows.Forms.Panel();
            this.button10 = new System.Windows.Forms.Button();
            this.lblACh2B = new System.Windows.Forms.Label();
            this.lblACh2 = new System.Windows.Forms.Label();
            this.picACh2 = new Steema.TeeChart.TChart();
            this.line19 = new Steema.TeeChart.Styles.Line();
            this.line7 = new Steema.TeeChart.Styles.Line();
            this.pnlBCh1V = new System.Windows.Forms.Panel();
            this.button11 = new System.Windows.Forms.Button();
            this.lblBCh1B = new System.Windows.Forms.Label();
            this.lblBCh1 = new System.Windows.Forms.Label();
            this.picBCh1 = new Steema.TeeChart.TChart();
            this.line21 = new Steema.TeeChart.Styles.Line();
            this.line25 = new Steema.TeeChart.Styles.Line();
            this.pnlBCh1C = new System.Windows.Forms.Panel();
            this.button12 = new System.Windows.Forms.Button();
            this.lblBCh2B = new System.Windows.Forms.Label();
            this.lblBCh2 = new System.Windows.Forms.Label();
            this.picBCh2 = new Steema.TeeChart.TChart();
            this.line22 = new Steema.TeeChart.Styles.Line();
            this.line26 = new Steema.TeeChart.Styles.Line();
            this.pnlBCh2V = new System.Windows.Forms.Panel();
            this.button13 = new System.Windows.Forms.Button();
            this.lblTempB = new System.Windows.Forms.Label();
            this.lblTemp = new System.Windows.Forms.Label();
            this.picTemp = new Steema.TeeChart.TChart();
            this.line23 = new Steema.TeeChart.Styles.Line();
            this.pnlACh1V = new System.Windows.Forms.Panel();
            this.button8 = new System.Windows.Forms.Button();
            this.lblACh0 = new System.Windows.Forms.Label();
            this.lblACh0B = new System.Windows.Forms.Label();
            this.picACh0 = new Steema.TeeChart.TChart();
            this.line17 = new Steema.TeeChart.Styles.Line();
            this.line20 = new Steema.TeeChart.Styles.Line();
            this.tabPage3 = new System.Windows.Forms.TabPage();
            this.tableLayoutPanel3 = new System.Windows.Forms.TableLayoutPanel();
            this.panel4 = new System.Windows.Forms.Panel();
            this.button15 = new System.Windows.Forms.Button();
            this.lblTotal = new System.Windows.Forms.Label();
            this.totalPic = new Steema.TeeChart.TChart();
            this.line16 = new Steema.TeeChart.Styles.Line();
            this.panel5 = new System.Windows.Forms.Panel();
            this.groupBox8 = new System.Windows.Forms.GroupBox();
            this.button6 = new System.Windows.Forms.Button();
            this.picEndTime = new System.Windows.Forms.DateTimePicker();
            this.pictureType = new System.Windows.Forms.ComboBox();
            this.picStartTime = new System.Windows.Forms.DateTimePicker();
            this.label3 = new System.Windows.Forms.Label();
            this.label13 = new System.Windows.Forms.Label();
            this.label11 = new System.Windows.Forms.Label();
            this.tabPage1 = new System.Windows.Forms.TabPage();
            this.tableLayoutPanel5 = new System.Windows.Forms.TableLayoutPanel();
            this.dgwData = new System.Windows.Forms.DataGridView();
            this.panel3 = new System.Windows.Forms.Panel();
            this.groupBox1 = new System.Windows.Forms.GroupBox();
            this.button17 = new System.Windows.Forms.Button();
            this.button5 = new System.Windows.Forms.Button();
            this.label20 = new System.Windows.Forms.Label();
            this.searchEndTime = new System.Windows.Forms.DateTimePicker();
            this.dataType = new System.Windows.Forms.ComboBox();
            this.label37 = new System.Windows.Forms.Label();
            this.label23 = new System.Windows.Forms.Label();
            this.searchStartTime = new System.Windows.Forms.DateTimePicker();
            this.sysInfo = new System.Windows.Forms.TabPage();
            this.tableLayoutPanel4 = new System.Windows.Forms.TableLayoutPanel();
            this.pnlNet = new System.Windows.Forms.Panel();
            this.tableLayoutPanel8 = new System.Windows.Forms.TableLayoutPanel();
            this.groupBox4 = new System.Windows.Forms.GroupBox();
            this.button19 = new System.Windows.Forms.Button();
            this.canAConnect = new System.Windows.Forms.Label();
            this.txtAIP = new System.Windows.Forms.TextBox();
            this.txtAPort = new System.Windows.Forms.TextBox();
            this.label115 = new System.Windows.Forms.Label();
            this.button2 = new System.Windows.Forms.Button();
            this.label38 = new System.Windows.Forms.Label();
            this.canBConnect = new System.Windows.Forms.Label();
            this.label18 = new System.Windows.Forms.Label();
            this.label22 = new System.Windows.Forms.Label();
            this.txtBIP = new System.Windows.Forms.TextBox();
            this.txtBPort = new System.Windows.Forms.TextBox();
            this.label19 = new System.Windows.Forms.Label();
            this.groupBox24 = new System.Windows.Forms.GroupBox();
            this.tableLayoutPanel9 = new System.Windows.Forms.TableLayoutPanel();
            this.webGPS = new System.Windows.Forms.WebBrowser();
            this.panel11 = new System.Windows.Forms.Panel();
            this.btnSwitch = new System.Windows.Forms.Button();
            this.cbSerial = new System.Windows.Forms.ComboBox();
            this.txtLatitude = new System.Windows.Forms.TextBox();
            this.label10 = new System.Windows.Forms.Label();
            this.txtLongitude = new System.Windows.Forms.TextBox();
            this.label8 = new System.Windows.Forms.Label();
            this.label116 = new System.Windows.Forms.Label();
            this.checkBox3 = new System.Windows.Forms.CheckBox();
            this.checkBox4 = new System.Windows.Forms.CheckBox();
            this.pnlControl = new System.Windows.Forms.Panel();
            this.tableLayoutPanel7 = new System.Windows.Forms.TableLayoutPanel();
            this.groupBox7 = new System.Windows.Forms.GroupBox();
            this.button28 = new System.Windows.Forms.Button();
            this.btnHighPowOn = new System.Windows.Forms.Button();
            this.label112 = new System.Windows.Forms.Label();
            this.btnHighPowOff = new System.Windows.Forms.Button();
            this.txtATemp = new System.Windows.Forms.TextBox();
            this.label111 = new System.Windows.Forms.Label();
            this.label25 = new System.Windows.Forms.Label();
            this.label24 = new System.Windows.Forms.Label();
            this.txtCommandNum = new System.Windows.Forms.TextBox();
            this.txtTotalNum = new System.Windows.Forms.TextBox();
            this.txtBTemp = new System.Windows.Forms.TextBox();
            this.label76 = new System.Windows.Forms.Label();
            this.label36 = new System.Windows.Forms.Label();
            this.label16 = new System.Windows.Forms.Label();
            this.canErrortime = new System.Windows.Forms.TextBox();
            this.canStartTime = new System.Windows.Forms.TextBox();
            this.panel10 = new System.Windows.Forms.Panel();
            this.groupBox2 = new System.Windows.Forms.GroupBox();
            this.txtCh3Vol = new System.Windows.Forms.TextBox();
            this.txtBCh5Logo = new System.Windows.Forms.TextBox();
            this.txtCh5Vol = new System.Windows.Forms.TextBox();
            this.label99 = new System.Windows.Forms.Label();
            this.txtCh5Cur = new System.Windows.Forms.TextBox();
            this.label101 = new System.Windows.Forms.Label();
            this.txtCh5Power = new System.Windows.Forms.TextBox();
            this.txtBCh5Status = new System.Windows.Forms.TextBox();
            this.label102 = new System.Windows.Forms.Label();
            this.txtCh5Time = new System.Windows.Forms.TextBox();
            this.txtBCh4Logo = new System.Windows.Forms.TextBox();
            this.txtCh4Vol = new System.Windows.Forms.TextBox();
            this.label42 = new System.Windows.Forms.Label();
            this.txtCh4Cur = new System.Windows.Forms.TextBox();
            this.label47 = new System.Windows.Forms.Label();
            this.txtCh4Power = new System.Windows.Forms.TextBox();
            this.txtBCh4Status = new System.Windows.Forms.TextBox();
            this.label48 = new System.Windows.Forms.Label();
            this.txtCh4Time = new System.Windows.Forms.TextBox();
            this.txtBCh3Logo = new System.Windows.Forms.TextBox();
            this.label1 = new System.Windows.Forms.Label();
            this.txtCh3Cur = new System.Windows.Forms.TextBox();
            this.label27 = new System.Windows.Forms.Label();
            this.txtCh3Power = new System.Windows.Forms.TextBox();
            this.txtBCh3Status = new System.Windows.Forms.TextBox();
            this.label28 = new System.Windows.Forms.Label();
            this.txtCh3Time = new System.Windows.Forms.TextBox();
            this.txtBCh2Logo = new System.Windows.Forms.TextBox();
            this.txtBCh1Logo = new System.Windows.Forms.TextBox();
            this.txtCh2Vol = new System.Windows.Forms.TextBox();
            this.txtCh1Vol = new System.Windows.Forms.TextBox();
            this.label50 = new System.Windows.Forms.Label();
            this.label49 = new System.Windows.Forms.Label();
            this.txtCh2Cur = new System.Windows.Forms.TextBox();
            this.txtCh1Cur = new System.Windows.Forms.TextBox();
            this.label45 = new System.Windows.Forms.Label();
            this.txtCh2Power = new System.Windows.Forms.TextBox();
            this.label44 = new System.Windows.Forms.Label();
            this.txtCh1Power = new System.Windows.Forms.TextBox();
            this.txtBCh1Status = new System.Windows.Forms.TextBox();
            this.txtBCh2Status = new System.Windows.Forms.TextBox();
            this.txtCh1Time = new System.Windows.Forms.TextBox();
            this.label32 = new System.Windows.Forms.Label();
            this.txtCh2Time = new System.Windows.Forms.TextBox();
            this.label30 = new System.Windows.Forms.Label();
            this.label100 = new System.Windows.Forms.Label();
            this.label43 = new System.Windows.Forms.Label();
            this.label4 = new System.Windows.Forms.Label();
            this.label5 = new System.Windows.Forms.Label();
            this.label6 = new System.Windows.Forms.Label();
            this.groupBox14 = new System.Windows.Forms.GroupBox();
            this.HCh1Close = new System.Windows.Forms.Button();
            this.HCh2Close = new System.Windows.Forms.Button();
            this.HCh1Open = new System.Windows.Forms.Button();
            this.HCh2Open = new System.Windows.Forms.Button();
            this.label114 = new System.Windows.Forms.Label();
            this.label113 = new System.Windows.Forms.Label();
            this.label9 = new System.Windows.Forms.Label();
            this.Ch5Open = new System.Windows.Forms.Button();
            this.Ch5Close = new System.Windows.Forms.Button();
            this.label7 = new System.Windows.Forms.Label();
            this.Ch4Open = new System.Windows.Forms.Button();
            this.Ch4Close = new System.Windows.Forms.Button();
            this.label2 = new System.Windows.Forms.Label();
            this.Ch3Open = new System.Windows.Forms.Button();
            this.Ch3Close = new System.Windows.Forms.Button();
            this.label39 = new System.Windows.Forms.Label();
            this.label35 = new System.Windows.Forms.Label();
            this.Ch1Open = new System.Windows.Forms.Button();
            this.Ch1Close = new System.Windows.Forms.Button();
            this.Ch2Open = new System.Windows.Forms.Button();
            this.Ch2Close = new System.Windows.Forms.Button();
            this.groupBox11 = new System.Windows.Forms.GroupBox();
            this.txtACh2Logo = new System.Windows.Forms.TextBox();
            this.txtACh2Vol = new System.Windows.Forms.TextBox();
            this.label31 = new System.Windows.Forms.Label();
            this.txtACh2Cur = new System.Windows.Forms.TextBox();
            this.label103 = new System.Windows.Forms.Label();
            this.txtACh2Power = new System.Windows.Forms.TextBox();
            this.txtACh2Status = new System.Windows.Forms.TextBox();
            this.label104 = new System.Windows.Forms.Label();
            this.txtACh2Time = new System.Windows.Forms.TextBox();
            this.txtACh1Logo = new System.Windows.Forms.TextBox();
            this.txtACh0Logo = new System.Windows.Forms.TextBox();
            this.txtACh1Vol = new System.Windows.Forms.TextBox();
            this.txtACh0Vol = new System.Windows.Forms.TextBox();
            this.label105 = new System.Windows.Forms.Label();
            this.label106 = new System.Windows.Forms.Label();
            this.txtACh1Cur = new System.Windows.Forms.TextBox();
            this.txtACh0Cur = new System.Windows.Forms.TextBox();
            this.label107 = new System.Windows.Forms.Label();
            this.txtACh1Power = new System.Windows.Forms.TextBox();
            this.label108 = new System.Windows.Forms.Label();
            this.txtACh0Power = new System.Windows.Forms.TextBox();
            this.txtACh0Status = new System.Windows.Forms.TextBox();
            this.txtACh1Status = new System.Windows.Forms.TextBox();
            this.txtACh0Time = new System.Windows.Forms.TextBox();
            this.label109 = new System.Windows.Forms.Label();
            this.txtACh1Time = new System.Windows.Forms.TextBox();
            this.label110 = new System.Windows.Forms.Label();
            this.label12 = new System.Windows.Forms.Label();
            this.label14 = new System.Windows.Forms.Label();
            this.label26 = new System.Windows.Forms.Label();
            this.panel12 = new System.Windows.Forms.Panel();
            this.groupBox6 = new System.Windows.Forms.GroupBox();
            this.dataGridView2 = new System.Windows.Forms.DataGridView();
            this.mainInfo = new System.Windows.Forms.TabControl();
            this.tabPage4 = new System.Windows.Forms.TabPage();
            this.tableLayoutPanel1 = new System.Windows.Forms.TableLayoutPanel();
            this.panel1 = new System.Windows.Forms.Panel();
            this.button18 = new System.Windows.Forms.Button();
            this.btnCamera = new System.Windows.Forms.Button();
            this.txtAddr1 = new System.Windows.Forms.TextBox();
            this.label46 = new System.Windows.Forms.Label();
            this.panel2 = new System.Windows.Forms.Panel();
            this.wb1 = new System.Windows.Forms.WebBrowser();
            this.tabPage6 = new System.Windows.Forms.TabPage();
            this.tableLayoutPanel2 = new System.Windows.Forms.TableLayoutPanel();
            this.groupBox16 = new System.Windows.Forms.GroupBox();
            this.dataGridView3 = new System.Windows.Forms.DataGridView();
            this.groupBox17 = new System.Windows.Forms.GroupBox();
            this.dataGridView4 = new System.Windows.Forms.DataGridView();
            this.groupBox18 = new System.Windows.Forms.GroupBox();
            this.groupBox19 = new System.Windows.Forms.GroupBox();
            this.btnFaultConfig = new System.Windows.Forms.Button();
            this.faultConnect = new System.Windows.Forms.Label();
            this.button1 = new System.Windows.Forms.Button();
            this.txtDataCollectPort = new System.Windows.Forms.TextBox();
            this.txtDataCollectIP = new System.Windows.Forms.TextBox();
            this.label53 = new System.Windows.Forms.Label();
            this.label54 = new System.Windows.Forms.Label();
            this.label55 = new System.Windows.Forms.Label();
            this.button4 = new System.Windows.Forms.Button();
            this.datacollectflag = new System.Windows.Forms.Label();
            this.serverConnet = new System.Windows.Forms.Label();
            this.label57 = new System.Windows.Forms.Label();
            this.label58 = new System.Windows.Forms.Label();
            this.label59 = new System.Windows.Forms.Label();
            this.checkBox1 = new System.Windows.Forms.CheckBox();
            this.checkBox2 = new System.Windows.Forms.CheckBox();
            this.faultPort = new System.Windows.Forms.TextBox();
            this.serverPort = new System.Windows.Forms.TextBox();
            this.faultIP = new System.Windows.Forms.TextBox();
            this.serverIP = new System.Windows.Forms.TextBox();
            this.groupBox20 = new System.Windows.Forms.GroupBox();
            this.button7 = new System.Windows.Forms.Button();
            this.label60 = new System.Windows.Forms.Label();
            this.comboBox1 = new System.Windows.Forms.ComboBox();
            this.panel6 = new System.Windows.Forms.Panel();
            this.panelRight = new System.Windows.Forms.GroupBox();
            this.groupBox21 = new System.Windows.Forms.GroupBox();
            this.groupBox22 = new System.Windows.Forms.GroupBox();
            this.label51 = new System.Windows.Forms.Label();
            this.label52 = new System.Windows.Forms.Label();
            this.label62 = new System.Windows.Forms.Label();
            this.label63 = new System.Windows.Forms.Label();
            this.label64 = new System.Windows.Forms.Label();
            this.chFiveClose = new System.Windows.Forms.Button();
            this.chFiveOpen = new System.Windows.Forms.Button();
            this.chFourClose = new System.Windows.Forms.Button();
            this.chFourOpen = new System.Windows.Forms.Button();
            this.chThreeClose = new System.Windows.Forms.Button();
            this.chThreeOpen = new System.Windows.Forms.Button();
            this.chTwoClose = new System.Windows.Forms.Button();
            this.chTwoOpen = new System.Windows.Forms.Button();
            this.chOneOpen = new System.Windows.Forms.Button();
            this.chOneClose = new System.Windows.Forms.Button();
            this.sensorFiveSendNum = new System.Windows.Forms.TextBox();
            this.sensorFourSendNum = new System.Windows.Forms.TextBox();
            this.sensorThreeSendNum = new System.Windows.Forms.TextBox();
            this.sensorTwoSendNum = new System.Windows.Forms.TextBox();
            this.label65 = new System.Windows.Forms.Label();
            this.label66 = new System.Windows.Forms.Label();
            this.label67 = new System.Windows.Forms.Label();
            this.label68 = new System.Windows.Forms.Label();
            this.sensorOneSendNum = new System.Windows.Forms.TextBox();
            this.label69 = new System.Windows.Forms.Label();
            this.label70 = new System.Windows.Forms.Label();
            this.label71 = new System.Windows.Forms.Label();
            this.label72 = new System.Windows.Forms.Label();
            this.label73 = new System.Windows.Forms.Label();
            this.canSendNum = new System.Windows.Forms.TextBox();
            this.canReceiveNum = new System.Windows.Forms.TextBox();
            this.txtCollectErrorTime = new System.Windows.Forms.TextBox();
            this.dataCollect1StartTime = new System.Windows.Forms.TextBox();
            this.canTemp = new System.Windows.Forms.TextBox();
            this.label74 = new System.Windows.Forms.Label();
            this.groupBox23 = new System.Windows.Forms.GroupBox();
            this.label75 = new System.Windows.Forms.Label();
            this.label77 = new System.Windows.Forms.Label();
            this.label78 = new System.Windows.Forms.Label();
            this.label79 = new System.Windows.Forms.Label();
            this.label80 = new System.Windows.Forms.Label();
            this.label81 = new System.Windows.Forms.Label();
            this.label82 = new System.Windows.Forms.Label();
            this.label83 = new System.Windows.Forms.Label();
            this.label84 = new System.Windows.Forms.Label();
            this.label85 = new System.Windows.Forms.Label();
            this.label86 = new System.Windows.Forms.Label();
            this.label87 = new System.Windows.Forms.Label();
            this.label88 = new System.Windows.Forms.Label();
            this.label89 = new System.Windows.Forms.Label();
            this.label90 = new System.Windows.Forms.Label();
            this.sensorFiveTime = new System.Windows.Forms.TextBox();
            this.sensorFourTime = new System.Windows.Forms.TextBox();
            this.sensorFiveStatus = new System.Windows.Forms.TextBox();
            this.sensorThreeTime = new System.Windows.Forms.TextBox();
            this.sensorFourStatus = new System.Windows.Forms.TextBox();
            this.sensorTwoTime = new System.Windows.Forms.TextBox();
            this.sensorThreeStatus = new System.Windows.Forms.TextBox();
            this.sensorOneTime = new System.Windows.Forms.TextBox();
            this.sensorTwoStatus = new System.Windows.Forms.TextBox();
            this.sensorFivePower = new System.Windows.Forms.TextBox();
            this.sensorThreePower = new System.Windows.Forms.TextBox();
            this.sensorFourPower = new System.Windows.Forms.TextBox();
            this.sensorTwoPower = new System.Windows.Forms.TextBox();
            this.sensorOnePower = new System.Windows.Forms.TextBox();
            this.sensorFiveCur = new System.Windows.Forms.TextBox();
            this.sensorThreeCur = new System.Windows.Forms.TextBox();
            this.sensorFourCur = new System.Windows.Forms.TextBox();
            this.sensorOneStatus = new System.Windows.Forms.TextBox();
            this.sensorTwoCur = new System.Windows.Forms.TextBox();
            this.sensorOneCur = new System.Windows.Forms.TextBox();
            this.sensorFiveVol = new System.Windows.Forms.TextBox();
            this.sensorThreeVol = new System.Windows.Forms.TextBox();
            this.label91 = new System.Windows.Forms.Label();
            this.sensorFourVol = new System.Windows.Forms.TextBox();
            this.label92 = new System.Windows.Forms.Label();
            this.label93 = new System.Windows.Forms.Label();
            this.sensorTwoVol = new System.Windows.Forms.TextBox();
            this.label94 = new System.Windows.Forms.Label();
            this.sensorOneVol = new System.Windows.Forms.TextBox();
            this.label95 = new System.Windows.Forms.Label();
            this.tabPage2 = new System.Windows.Forms.TabPage();
            this.TabLPnlSensor = new System.Windows.Forms.TableLayoutPanel();
            this.pnlDO = new System.Windows.Forms.Panel();
            this.button14 = new System.Windows.Forms.Button();
            this.lblDO = new System.Windows.Forms.Label();
            this.lblDOB = new System.Windows.Forms.Label();
            this.picDO = new Steema.TeeChart.TChart();
            this.line1 = new Steema.TeeChart.Styles.Line();
            this.pnlADL = new System.Windows.Forms.Panel();
            this.button20 = new System.Windows.Forms.Button();
            this.lblADLB = new System.Windows.Forms.Label();
            this.lblADL = new System.Windows.Forms.Label();
            this.picPH = new Steema.TeeChart.TChart();
            this.line2 = new Steema.TeeChart.Styles.Line();
            this.pnlCTD = new System.Windows.Forms.Panel();
            this.button21 = new System.Windows.Forms.Button();
            this.lblCTDB = new System.Windows.Forms.Label();
            this.lblCTD = new System.Windows.Forms.Label();
            this.picCTD = new Steema.TeeChart.TChart();
            this.contextMenuStrip1 = new System.Windows.Forms.ContextMenuStrip(this.components);
            this.显示电导率曲线ToolStripMenuItem = new System.Windows.Forms.ToolStripMenuItem();
            this.显示温度曲线ToolStripMenuItem = new System.Windows.Forms.ToolStripMenuItem();
            this.显示深度曲线ToolStripMenuItem = new System.Windows.Forms.ToolStripMenuItem();
            this.显示盐度曲线ToolStripMenuItem = new System.Windows.Forms.ToolStripMenuItem();
            this.全部显示ToolStripMenuItem = new System.Windows.Forms.ToolStripMenuItem();
            this.显示配置ToolStripMenuItem = new System.Windows.Forms.ToolStripMenuItem();
            this.line3 = new Steema.TeeChart.Styles.Line();
            this.line9 = new Steema.TeeChart.Styles.Line();
            this.line10 = new Steema.TeeChart.Styles.Line();
            this.line11 = new Steema.TeeChart.Styles.Line();
            this.pnlCDOM = new System.Windows.Forms.Panel();
            this.button22 = new System.Windows.Forms.Button();
            this.lblMultiB = new System.Windows.Forms.Label();
            this.lblMulti = new System.Windows.Forms.Label();
            this.picMultiPara = new Steema.TeeChart.TChart();
            this.line4 = new Steema.TeeChart.Styles.Line();
            this.line5 = new Steema.TeeChart.Styles.Line();
            this.line6 = new Steema.TeeChart.Styles.Line();
            this.pnlDO1 = new System.Windows.Forms.Panel();
            this.groupBox9 = new System.Windows.Forms.GroupBox();
            this.txtDODate = new System.Windows.Forms.TextBox();
            this.txtDOValue = new System.Windows.Forms.TextBox();
            this.label33 = new System.Windows.Forms.Label();
            this.label15 = new System.Windows.Forms.Label();
            this.pnlADL1 = new System.Windows.Forms.Panel();
            this.groupBox10 = new System.Windows.Forms.GroupBox();
            this.txtADLDate = new System.Windows.Forms.TextBox();
            this.txtADLValue = new System.Windows.Forms.TextBox();
            this.label17 = new System.Windows.Forms.Label();
            this.label34 = new System.Windows.Forms.Label();
            this.pnlCTD1 = new System.Windows.Forms.Panel();
            this.groupBox12 = new System.Windows.Forms.GroupBox();
            this.txtCTD_Depth = new System.Windows.Forms.TextBox();
            this.label96 = new System.Windows.Forms.Label();
            this.txtCTD_Temp = new System.Windows.Forms.TextBox();
            this.label61 = new System.Windows.Forms.Label();
            this.txtCTDDate = new System.Windows.Forms.TextBox();
            this.txtCTDValue = new System.Windows.Forms.TextBox();
            this.label21 = new System.Windows.Forms.Label();
            this.label40 = new System.Windows.Forms.Label();
            this.pnlCDOM1 = new System.Windows.Forms.Panel();
            this.groupBox15 = new System.Windows.Forms.GroupBox();
            this.txtM_Phy = new System.Windows.Forms.TextBox();
            this.label98 = new System.Windows.Forms.Label();
            this.txtM_Tur = new System.Windows.Forms.TextBox();
            this.label97 = new System.Windows.Forms.Label();
            this.txtMultiDate = new System.Windows.Forms.TextBox();
            this.txtM_Chl = new System.Windows.Forms.TextBox();
            this.label29 = new System.Windows.Forms.Label();
            this.label41 = new System.Windows.Forms.Label();
            this.tabPage9 = new System.Windows.Forms.TabPage();
            this.panel7 = new System.Windows.Forms.Panel();
            this.tableLayoutPanel6 = new System.Windows.Forms.TableLayoutPanel();
            this.panel8 = new System.Windows.Forms.Panel();
            this.button16 = new System.Windows.Forms.Button();
            this.txtAddr2 = new System.Windows.Forms.TextBox();
            this.label56 = new System.Windows.Forms.Label();
            this.panel9 = new System.Windows.Forms.Panel();
            this.wb2 = new System.Windows.Forms.WebBrowser();
            this.contextMenuStrip2 = new System.Windows.Forms.ContextMenuStrip(this.components);
            this.line8 = new Steema.TeeChart.Styles.Line();
            this.statusStrip1.SuspendLayout();
            this.pnlTop.SuspendLayout();
            ((System.ComponentModel.ISupportInitialize)(this.pictureBox1)).BeginInit();
            this.tabPage5.SuspendLayout();
            this.TabLPnlStatus.SuspendLayout();
            this.pnlACh1C.SuspendLayout();
            this.pnlACh2V.SuspendLayout();
            this.pnlBCh1V.SuspendLayout();
            this.pnlBCh1C.SuspendLayout();
            this.pnlBCh2V.SuspendLayout();
            this.pnlACh1V.SuspendLayout();
            this.tabPage3.SuspendLayout();
            this.tableLayoutPanel3.SuspendLayout();
            this.panel4.SuspendLayout();
            this.panel5.SuspendLayout();
            this.groupBox8.SuspendLayout();
            this.tabPage1.SuspendLayout();
            this.tableLayoutPanel5.SuspendLayout();
            ((System.ComponentModel.ISupportInitialize)(this.dgwData)).BeginInit();
            this.panel3.SuspendLayout();
            this.groupBox1.SuspendLayout();
            this.sysInfo.SuspendLayout();
            this.tableLayoutPanel4.SuspendLayout();
            this.pnlNet.SuspendLayout();
            this.tableLayoutPanel8.SuspendLayout();
            this.groupBox4.SuspendLayout();
            this.groupBox24.SuspendLayout();
            this.tableLayoutPanel9.SuspendLayout();
            this.panel11.SuspendLayout();
            this.pnlControl.SuspendLayout();
            this.tableLayoutPanel7.SuspendLayout();
            this.groupBox7.SuspendLayout();
            this.panel10.SuspendLayout();
            this.groupBox2.SuspendLayout();
            this.groupBox14.SuspendLayout();
            this.groupBox11.SuspendLayout();
            this.panel12.SuspendLayout();
            this.groupBox6.SuspendLayout();
            ((System.ComponentModel.ISupportInitialize)(this.dataGridView2)).BeginInit();
            this.mainInfo.SuspendLayout();
            this.tabPage4.SuspendLayout();
            this.tableLayoutPanel1.SuspendLayout();
            this.panel1.SuspendLayout();
            this.panel2.SuspendLayout();
            this.tabPage6.SuspendLayout();
            this.tableLayoutPanel2.SuspendLayout();
            this.groupBox16.SuspendLayout();
            ((System.ComponentModel.ISupportInitialize)(this.dataGridView3)).BeginInit();
            this.groupBox17.SuspendLayout();
            ((System.ComponentModel.ISupportInitialize)(this.dataGridView4)).BeginInit();
            this.groupBox18.SuspendLayout();
            this.groupBox19.SuspendLayout();
            this.groupBox20.SuspendLayout();
            this.panel6.SuspendLayout();
            this.panelRight.SuspendLayout();
            this.groupBox21.SuspendLayout();
            this.groupBox22.SuspendLayout();
            this.groupBox23.SuspendLayout();
            this.tabPage2.SuspendLayout();
            this.TabLPnlSensor.SuspendLayout();
            this.pnlDO.SuspendLayout();
            this.pnlADL.SuspendLayout();
            this.pnlCTD.SuspendLayout();
            this.contextMenuStrip1.SuspendLayout();
            this.pnlCDOM.SuspendLayout();
            this.pnlDO1.SuspendLayout();
            this.groupBox9.SuspendLayout();
            this.pnlADL1.SuspendLayout();
            this.groupBox10.SuspendLayout();
            this.pnlCTD1.SuspendLayout();
            this.groupBox12.SuspendLayout();
            this.pnlCDOM1.SuspendLayout();
            this.groupBox15.SuspendLayout();
            this.tabPage9.SuspendLayout();
            this.panel7.SuspendLayout();
            this.tableLayoutPanel6.SuspendLayout();
            this.panel8.SuspendLayout();
            this.panel9.SuspendLayout();
            this.SuspendLayout();
            // 
            // statusStrip1
            // 
            this.statusStrip1.Items.AddRange(new System.Windows.Forms.ToolStripItem[] {
            this.toolStripStatusLabel1,
            this.toolStripStatusLabel2,
            this.systemTime});
            this.statusStrip1.Location = new System.Drawing.Point(0, 682);
            this.statusStrip1.Name = "statusStrip1";
            this.statusStrip1.Size = new System.Drawing.Size(1169, 22);
            this.statusStrip1.TabIndex = 0;
            this.statusStrip1.Text = "statusStrip1";
            // 
            // toolStripStatusLabel1
            // 
            this.toolStripStatusLabel1.Name = "toolStripStatusLabel1";
            this.toolStripStatusLabel1.Size = new System.Drawing.Size(204, 17);
            this.toolStripStatusLabel1.Text = "欢迎使用本软件CopyRight ©山仪所";
            // 
            // toolStripStatusLabel2
            // 
            this.toolStripStatusLabel2.Name = "toolStripStatusLabel2";
            this.toolStripStatusLabel2.Size = new System.Drawing.Size(36, 17);
            this.toolStripStatusLabel2.Text = "       ";
            // 
            // systemTime
            // 
            this.systemTime.BorderSides = System.Windows.Forms.ToolStripStatusLabelBorderSides.Right;
            this.systemTime.Name = "systemTime";
            this.systemTime.Size = new System.Drawing.Size(914, 17);
            this.systemTime.Spring = true;
            this.systemTime.TextAlign = System.Drawing.ContentAlignment.MiddleRight;
            // 
            // pnlTop
            // 
            this.pnlTop.AllowDrop = true;
            this.pnlTop.Controls.Add(this.pictureBox1);
            this.pnlTop.Dock = System.Windows.Forms.DockStyle.Top;
            this.pnlTop.Location = new System.Drawing.Point(0, 0);
            this.pnlTop.Name = "pnlTop";
            this.pnlTop.Size = new System.Drawing.Size(1169, 109);
            this.pnlTop.TabIndex = 1;
            // 
            // pictureBox1
            // 
            this.pictureBox1.Dock = System.Windows.Forms.DockStyle.Fill;
            this.pictureBox1.Image = ((System.Drawing.Image)(resources.GetObject("pictureBox1.Image")));
            this.pictureBox1.Location = new System.Drawing.Point(0, 0);
            this.pictureBox1.Name = "pictureBox1";
            this.pictureBox1.Size = new System.Drawing.Size(1169, 109);
            this.pictureBox1.TabIndex = 0;
            this.pictureBox1.TabStop = false;
            this.pictureBox1.MouseMove += new System.Windows.Forms.MouseEventHandler(this.pictureBox1_MouseMove);
            // 
            // sysTimer
            // 
            this.sysTimer.Tick += new System.EventHandler(this.sysTimer_Tick);
            // 
            // tabPage5
            // 
            this.tabPage5.BackColor = System.Drawing.SystemColors.Control;
            this.tabPage5.Controls.Add(this.TabLPnlStatus);
            this.tabPage5.Font = new System.Drawing.Font("Times New Roman", 14.25F);
            this.tabPage5.ForeColor = System.Drawing.SystemColors.ControlText;
            this.tabPage5.Location = new System.Drawing.Point(4, 30);
            this.tabPage5.Name = "tabPage5";
            this.tabPage5.Size = new System.Drawing.Size(1161, 539);
            this.tabPage5.TabIndex = 6;
            this.tabPage5.Text = "接驳盒状态曲线";
            // 
            // TabLPnlStatus
            // 
            this.TabLPnlStatus.BackColor = System.Drawing.SystemColors.Control;
            this.TabLPnlStatus.ColumnCount = 3;
            this.TabLPnlStatus.ColumnStyles.Add(new System.Windows.Forms.ColumnStyle(System.Windows.Forms.SizeType.Percent, 33.33333F));
            this.TabLPnlStatus.ColumnStyles.Add(new System.Windows.Forms.ColumnStyle(System.Windows.Forms.SizeType.Percent, 33.33333F));
            this.TabLPnlStatus.ColumnStyles.Add(new System.Windows.Forms.ColumnStyle(System.Windows.Forms.SizeType.Percent, 33.33333F));
            this.TabLPnlStatus.Controls.Add(this.pnlACh1C, 1, 0);
            this.TabLPnlStatus.Controls.Add(this.pnlACh2V, 2, 0);
            this.TabLPnlStatus.Controls.Add(this.pnlBCh1V, 0, 1);
            this.TabLPnlStatus.Controls.Add(this.pnlBCh1C, 1, 1);
            this.TabLPnlStatus.Controls.Add(this.pnlBCh2V, 2, 1);
            this.TabLPnlStatus.Controls.Add(this.pnlACh1V, 0, 0);
            this.TabLPnlStatus.Dock = System.Windows.Forms.DockStyle.Fill;
            this.TabLPnlStatus.Location = new System.Drawing.Point(0, 0);
            this.TabLPnlStatus.Name = "TabLPnlStatus";
            this.TabLPnlStatus.RowCount = 2;
            this.TabLPnlStatus.RowStyles.Add(new System.Windows.Forms.RowStyle(System.Windows.Forms.SizeType.Percent, 50F));
            this.TabLPnlStatus.RowStyles.Add(new System.Windows.Forms.RowStyle(System.Windows.Forms.SizeType.Percent, 50F));
            this.TabLPnlStatus.Size = new System.Drawing.Size(1161, 539);
            this.TabLPnlStatus.TabIndex = 0;
            // 
            // pnlACh1C
            // 
            this.pnlACh1C.Controls.Add(this.button9);
            this.pnlACh1C.Controls.Add(this.lblACh1B);
            this.pnlACh1C.Controls.Add(this.lblACh1);
            this.pnlACh1C.Controls.Add(this.picACh1);
            this.pnlACh1C.Dock = System.Windows.Forms.DockStyle.Fill;
            this.pnlACh1C.Location = new System.Drawing.Point(390, 3);
            this.pnlACh1C.Name = "pnlACh1C";
            this.pnlACh1C.Size = new System.Drawing.Size(381, 263);
            this.pnlACh1C.TabIndex = 1;
            // 
            // button9
            // 
            this.button9.FlatStyle = System.Windows.Forms.FlatStyle.Flat;
            this.button9.Font = new System.Drawing.Font("宋体", 10.5F, System.Drawing.FontStyle.Regular, System.Drawing.GraphicsUnit.Point, ((byte)(134)));
            this.button9.ForeColor = System.Drawing.Color.FromArgb(((int)(((byte)(0)))), ((int)(((byte)(192)))), ((int)(((byte)(192)))));
            this.button9.Location = new System.Drawing.Point(0, 1);
            this.button9.Name = "button9";
            this.button9.Size = new System.Drawing.Size(75, 25);
            this.button9.TabIndex = 4;
            this.button9.Text = "更改纵轴";
            this.button9.UseVisualStyleBackColor = true;
            this.button9.Click += new System.EventHandler(this.button9_Click_2);
            // 
            // lblACh1B
            // 
            this.lblACh1B.AutoSize = true;
            this.lblACh1B.BackColor = System.Drawing.SystemColors.Control;
            this.lblACh1B.Font = new System.Drawing.Font("Times New Roman", 15F);
            this.lblACh1B.Location = new System.Drawing.Point(262, 155);
            this.lblACh1B.Name = "lblACh1B";
            this.lblACh1B.Size = new System.Drawing.Size(91, 22);
            this.lblACh1B.TabIndex = 2;
            this.lblACh1B.Text = "lblACh1B";
            this.lblACh1B.Visible = false;
            // 
            // lblACh1
            // 
            this.lblACh1.AutoSize = true;
            this.lblACh1.BackColor = System.Drawing.SystemColors.Control;
            this.lblACh1.Font = new System.Drawing.Font("Times New Roman", 10.5F);
            this.lblACh1.Location = new System.Drawing.Point(172, 155);
            this.lblACh1.Name = "lblACh1";
            this.lblACh1.Size = new System.Drawing.Size(53, 16);
            this.lblACh1.TabIndex = 1;
            this.lblACh1.Text = "lblACh1";
            this.lblACh1.Visible = false;
            // 
            // picACh1
            // 
            // 
            // 
            // 
            this.picACh1.Aspect.ZOffset = 0D;
            // 
            // 
            // 
            // 
            // 
            // 
            // 
            // 
            // 
            this.picACh1.Axes.Bottom.Title.Caption = "个数/个";
            this.picACh1.Axes.Bottom.Title.Lines = new string[] {
        "个数/个"};
            // 
            // 
            // 
            this.picACh1.Axes.Left.Automatic = false;
            this.picACh1.Axes.Left.AutomaticMaximum = false;
            this.picACh1.Axes.Left.AutomaticMinimum = false;
            this.picACh1.Axes.Left.Maximum = 500D;
            this.picACh1.Axes.Left.Minimum = -100D;
            // 
            // 
            // 
            this.picACh1.Axes.Left.Title.Caption = "电流/电压值";
            this.picACh1.Axes.Left.Title.Lines = new string[] {
        "电流/电压值"};
            this.picACh1.Dock = System.Windows.Forms.DockStyle.Fill;
            // 
            // 
            // 
            this.picACh1.Header.Alignment = System.Drawing.StringAlignment.Far;
            // 
            // 
            // 
            // 
            // 
            // 
            this.picACh1.Header.Font.Brush.Color = System.Drawing.Color.FromArgb(((int)(((byte)(0)))), ((int)(((byte)(0)))), ((int)(((byte)(0)))));
            this.picACh1.Header.Lines = new string[] {
        "主接驳盒后端1路电压/电流采集值曲线"};
            // 
            // 
            // 
            this.picACh1.Legend.CheckBoxes = true;
            // 
            // 
            // 
            // 
            // 
            // 
            this.picACh1.Legend.Font.Brush.Color = System.Drawing.Color.Red;
            this.picACh1.Legend.FontSeriesColor = true;
            this.picACh1.Legend.ResizeChart = false;
            this.picACh1.Legend.Transparent = true;
            this.picACh1.Location = new System.Drawing.Point(0, 0);
            this.picACh1.Name = "picACh1";
            // 
            // 
            // 
            // 
            // 
            // 
            // 
            // 
            // 
            this.picACh1.Panel.Brush.Gradient.EndColor = System.Drawing.Color.FromArgb(((int)(((byte)(234)))), ((int)(((byte)(234)))), ((int)(((byte)(234)))));
            this.picACh1.Panel.Brush.Gradient.UseMiddle = false;
            this.picACh1.Series.Add(this.line18);
            this.picACh1.Series.Add(this.line24);
            this.picACh1.Size = new System.Drawing.Size(381, 263);
            this.picACh1.TabIndex = 0;
            // 
            // 
            // 
            this.picACh1.Walls.Visible = false;
            this.picACh1.DoubleClick += new System.EventHandler(this.picACh2_DoubleClick);
            this.picACh1.MouseMove += new System.Windows.Forms.MouseEventHandler(this.picACh2_MouseMove);
            // 
            // line18
            // 
            // 
            // 
            // 
            this.line18.Brush.Color = System.Drawing.Color.Blue;
            this.line18.Color = System.Drawing.Color.Blue;
            this.line18.ColorEach = false;
            // 
            // 
            // 
            this.line18.LinePen.Color = System.Drawing.Color.FromArgb(((int)(((byte)(41)))), ((int)(((byte)(61)))), ((int)(((byte)(98)))));
            this.line18.LinePen.Width = 2;
            // 
            // 
            // 
            // 
            // 
            // 
            this.line18.Marks.Callout.ArrowHead = Steema.TeeChart.Styles.ArrowHeadStyles.None;
            this.line18.Marks.Callout.ArrowHeadSize = 8;
            // 
            // 
            // 
            this.line18.Marks.Callout.Brush.Color = System.Drawing.Color.Black;
            this.line18.Marks.Callout.Distance = 0;
            this.line18.Marks.Callout.Draw3D = false;
            this.line18.Marks.Callout.Length = 10;
            this.line18.Marks.Callout.Style = Steema.TeeChart.Styles.PointerStyles.Rectangle;
            // 
            // 
            // 
            // 
            // 
            // 
            // 
            // 
            // 
            this.line18.Pointer.Brush.Gradient.Transparency = 100;
            this.line18.Pointer.Style = Steema.TeeChart.Styles.PointerStyles.Rectangle;
            this.line18.Title = "电流";
            // 
            // 
            // 
            this.line18.XValues.DataMember = "X";
            this.line18.XValues.Order = Steema.TeeChart.Styles.ValueListOrder.Ascending;
            // 
            // 
            // 
            this.line18.YValues.DataMember = "Y";
            // 
            // line24
            // 
            // 
            // 
            // 
            this.line24.Brush.Color = System.Drawing.Color.Red;
            this.line24.Color = System.Drawing.Color.Red;
            this.line24.ColorEach = false;
            // 
            // 
            // 
            this.line24.LinePen.Color = System.Drawing.Color.FromArgb(((int)(((byte)(146)))), ((int)(((byte)(94)))), ((int)(((byte)(32)))));
            this.line24.LinePen.Width = 2;
            // 
            // 
            // 
            // 
            // 
            // 
            this.line24.Marks.Callout.ArrowHead = Steema.TeeChart.Styles.ArrowHeadStyles.None;
            this.line24.Marks.Callout.ArrowHeadSize = 8;
            // 
            // 
            // 
            this.line24.Marks.Callout.Brush.Color = System.Drawing.Color.Black;
            this.line24.Marks.Callout.Distance = 0;
            this.line24.Marks.Callout.Draw3D = false;
            this.line24.Marks.Callout.Length = 10;
            this.line24.Marks.Callout.Style = Steema.TeeChart.Styles.PointerStyles.Rectangle;
            // 
            // 
            // 
            this.line24.Pointer.Style = Steema.TeeChart.Styles.PointerStyles.Rectangle;
            this.line24.Title = "电压";
            // 
            // 
            // 
            this.line24.XValues.DataMember = "X";
            this.line24.XValues.Order = Steema.TeeChart.Styles.ValueListOrder.Ascending;
            // 
            // 
            // 
            this.line24.YValues.DataMember = "Y";
            // 
            // pnlACh2V
            // 
            this.pnlACh2V.Controls.Add(this.button10);
            this.pnlACh2V.Controls.Add(this.lblACh2B);
            this.pnlACh2V.Controls.Add(this.lblACh2);
            this.pnlACh2V.Controls.Add(this.picACh2);
            this.pnlACh2V.Dock = System.Windows.Forms.DockStyle.Fill;
            this.pnlACh2V.Location = new System.Drawing.Point(777, 3);
            this.pnlACh2V.Name = "pnlACh2V";
            this.pnlACh2V.Size = new System.Drawing.Size(381, 263);
            this.pnlACh2V.TabIndex = 2;
            // 
            // button10
            // 
            this.button10.FlatStyle = System.Windows.Forms.FlatStyle.Flat;
            this.button10.Font = new System.Drawing.Font("宋体", 10.5F, System.Drawing.FontStyle.Regular, System.Drawing.GraphicsUnit.Point, ((byte)(134)));
            this.button10.ForeColor = System.Drawing.Color.FromArgb(((int)(((byte)(0)))), ((int)(((byte)(192)))), ((int)(((byte)(192)))));
            this.button10.Location = new System.Drawing.Point(0, 1);
            this.button10.Name = "button10";
            this.button10.Size = new System.Drawing.Size(75, 25);
            this.button10.TabIndex = 4;
            this.button10.Text = "更改纵轴";
            this.button10.UseVisualStyleBackColor = true;
            this.button10.Click += new System.EventHandler(this.button10_Click_2);
            // 
            // lblACh2B
            // 
            this.lblACh2B.AutoSize = true;
            this.lblACh2B.BackColor = System.Drawing.SystemColors.Control;
            this.lblACh2B.Font = new System.Drawing.Font("Times New Roman", 15F);
            this.lblACh2B.Location = new System.Drawing.Point(175, 218);
            this.lblACh2B.Name = "lblACh2B";
            this.lblACh2B.Size = new System.Drawing.Size(91, 22);
            this.lblACh2B.TabIndex = 2;
            this.lblACh2B.Text = "lblACh2B";
            this.lblACh2B.Visible = false;
            // 
            // lblACh2
            // 
            this.lblACh2.AutoSize = true;
            this.lblACh2.BackColor = System.Drawing.SystemColors.Control;
            this.lblACh2.Font = new System.Drawing.Font("Times New Roman", 10.5F);
            this.lblACh2.Location = new System.Drawing.Point(88, 224);
            this.lblACh2.Name = "lblACh2";
            this.lblACh2.Size = new System.Drawing.Size(53, 16);
            this.lblACh2.TabIndex = 1;
            this.lblACh2.Text = "lblACh2";
            this.lblACh2.Visible = false;
            // 
            // picACh2
            // 
            // 
            // 
            // 
            this.picACh2.Aspect.ZOffset = 0D;
            // 
            // 
            // 
            // 
            // 
            // 
            // 
            // 
            // 
            this.picACh2.Axes.Bottom.Title.Caption = "个数/个";
            this.picACh2.Axes.Bottom.Title.Lines = new string[] {
        "个数/个"};
            // 
            // 
            // 
            this.picACh2.Axes.Left.Automatic = false;
            this.picACh2.Axes.Left.AutomaticMaximum = false;
            this.picACh2.Axes.Left.AutomaticMinimum = false;
            this.picACh2.Axes.Left.Maximum = 500D;
            this.picACh2.Axes.Left.Minimum = -100D;
            // 
            // 
            // 
            this.picACh2.Axes.Left.Title.Caption = "电流/电压值";
            this.picACh2.Axes.Left.Title.Lines = new string[] {
        "电流/电压值"};
            this.picACh2.Cursor = System.Windows.Forms.Cursors.Default;
            this.picACh2.Dock = System.Windows.Forms.DockStyle.Fill;
            // 
            // 
            // 
            this.picACh2.Header.Alignment = System.Drawing.StringAlignment.Far;
            // 
            // 
            // 
            // 
            // 
            // 
            this.picACh2.Header.Font.Brush.Color = System.Drawing.Color.FromArgb(((int)(((byte)(0)))), ((int)(((byte)(0)))), ((int)(((byte)(0)))));
            this.picACh2.Header.Lines = new string[] {
        "主接驳盒后端2路电压/电流采集值曲线"};
            // 
            // 
            // 
            // 
            // 
            // 
            // 
            // 
            // 
            this.picACh2.Legend.Brush.Gradient.Visible = true;
            this.picACh2.Legend.CheckBoxes = true;
            // 
            // 
            // 
            this.picACh2.Legend.DividingLines.Transparency = 100;
            // 
            // 
            // 
            // 
            // 
            // 
            this.picACh2.Legend.Font.Brush.Color = System.Drawing.Color.FromArgb(((int)(((byte)(255)))), ((int)(((byte)(0)))), ((int)(((byte)(0)))));
            // 
            // 
            // 
            // 
            // 
            // 
            this.picACh2.Legend.Font.Shadow.Brush.Color = System.Drawing.Color.FromArgb(((int)(((byte)(0)))), ((int)(((byte)(169)))), ((int)(((byte)(169)))), ((int)(((byte)(169)))));
            // 
            // 
            // 
            this.picACh2.Legend.Font.Shadow.Brush.Gradient.Transparency = 100;
            this.picACh2.Legend.FontSeriesColor = true;
            this.picACh2.Legend.ResizeChart = false;
            // 
            // 
            // 
            this.picACh2.Legend.Shadow.Visible = false;
            // 
            // 
            // 
            // 
            // 
            // 
            this.picACh2.Legend.Title.Brush.Color = System.Drawing.Color.FromArgb(((int)(((byte)(0)))), ((int)(((byte)(255)))), ((int)(((byte)(255)))), ((int)(((byte)(255)))));
            // 
            // 
            // 
            this.picACh2.Legend.Title.Brush.Gradient.StartColor = System.Drawing.Color.FromArgb(((int)(((byte)(0)))), ((int)(((byte)(255)))), ((int)(((byte)(215)))), ((int)(((byte)(0)))));
            this.picACh2.Legend.Title.Brush.Gradient.Transparency = 100;
            // 
            // 
            // 
            // 
            // 
            // 
            this.picACh2.Legend.Title.Shadow.Brush.Color = System.Drawing.Color.FromArgb(((int)(((byte)(0)))), ((int)(((byte)(169)))), ((int)(((byte)(169)))), ((int)(((byte)(169)))));
            // 
            // 
            // 
            this.picACh2.Legend.Title.Shadow.Brush.Gradient.Transparency = 100;
            this.picACh2.Legend.Transparent = true;
            this.picACh2.Location = new System.Drawing.Point(0, 0);
            this.picACh2.Name = "picACh2";
            // 
            // 
            // 
            // 
            // 
            // 
            // 
            // 
            // 
            this.picACh2.Panel.Brush.Gradient.EndColor = System.Drawing.Color.FromArgb(((int)(((byte)(234)))), ((int)(((byte)(234)))), ((int)(((byte)(234)))));
            this.picACh2.Panel.Brush.Gradient.UseMiddle = false;
            this.picACh2.Series.Add(this.line19);
            this.picACh2.Series.Add(this.line7);
            this.picACh2.Size = new System.Drawing.Size(381, 263);
            this.picACh2.TabIndex = 0;
            // 
            // 
            // 
            this.picACh2.Walls.Visible = false;
            this.picACh2.DoubleClick += new System.EventHandler(this.picATemp_DoubleClick);
            this.picACh2.MouseMove += new System.Windows.Forms.MouseEventHandler(this.picATemp_MouseMove);
            // 
            // line19
            // 
            // 
            // 
            // 
            this.line19.Brush.Color = System.Drawing.Color.Blue;
            this.line19.Color = System.Drawing.Color.Blue;
            this.line19.ColorEach = false;
            // 
            // 
            // 
            this.line19.LinePen.Color = System.Drawing.Color.FromArgb(((int)(((byte)(41)))), ((int)(((byte)(61)))), ((int)(((byte)(98)))));
            this.line19.LinePen.Width = 2;
            // 
            // 
            // 
            // 
            // 
            // 
            this.line19.Marks.Callout.ArrowHead = Steema.TeeChart.Styles.ArrowHeadStyles.None;
            this.line19.Marks.Callout.ArrowHeadSize = 8;
            // 
            // 
            // 
            this.line19.Marks.Callout.Brush.Color = System.Drawing.Color.Black;
            this.line19.Marks.Callout.Distance = 0;
            this.line19.Marks.Callout.Draw3D = false;
            this.line19.Marks.Callout.Length = 10;
            this.line19.Marks.Callout.Style = Steema.TeeChart.Styles.PointerStyles.Rectangle;
            // 
            // 
            // 
            // 
            // 
            // 
            // 
            // 
            // 
            this.line19.Pointer.Brush.Gradient.Transparency = 100;
            this.line19.Pointer.Style = Steema.TeeChart.Styles.PointerStyles.Rectangle;
            this.line19.Title = "电流";
            // 
            // 
            // 
            this.line19.XValues.DataMember = "X";
            this.line19.XValues.Order = Steema.TeeChart.Styles.ValueListOrder.Ascending;
            // 
            // 
            // 
            this.line19.YValues.DataMember = "Y";
            // 
            // line7
            // 
            // 
            // 
            // 
            this.line7.Brush.Color = System.Drawing.Color.FromArgb(((int)(((byte)(255)))), ((int)(((byte)(0)))), ((int)(((byte)(0)))));
            this.line7.Color = System.Drawing.Color.FromArgb(((int)(((byte)(255)))), ((int)(((byte)(0)))), ((int)(((byte)(0)))));
            this.line7.ColorEach = false;
            // 
            // 
            // 
            this.line7.LinePen.Color = System.Drawing.Color.FromArgb(((int)(((byte)(41)))), ((int)(((byte)(61)))), ((int)(((byte)(98)))));
            this.line7.LinePen.Width = 2;
            // 
            // 
            // 
            // 
            // 
            // 
            this.line7.Marks.Callout.ArrowHead = Steema.TeeChart.Styles.ArrowHeadStyles.None;
            this.line7.Marks.Callout.ArrowHeadSize = 8;
            // 
            // 
            // 
            this.line7.Marks.Callout.Brush.Color = System.Drawing.Color.Black;
            this.line7.Marks.Callout.Distance = 0;
            this.line7.Marks.Callout.Draw3D = false;
            this.line7.Marks.Callout.Length = 10;
            this.line7.Marks.Callout.Style = Steema.TeeChart.Styles.PointerStyles.Rectangle;
            // 
            // 
            // 
            // 
            // 
            // 
            // 
            // 
            // 
            this.line7.Pointer.Brush.Gradient.Transparency = 100;
            this.line7.Pointer.Style = Steema.TeeChart.Styles.PointerStyles.Rectangle;
            this.line7.Title = "电压";
            // 
            // 
            // 
            this.line7.XValues.DataMember = "X";
            this.line7.XValues.Order = Steema.TeeChart.Styles.ValueListOrder.Ascending;
            // 
            // 
            // 
            this.line7.YValues.DataMember = "Y";
            // 
            // pnlBCh1V
            // 
            this.pnlBCh1V.Controls.Add(this.button11);
            this.pnlBCh1V.Controls.Add(this.lblBCh1B);
            this.pnlBCh1V.Controls.Add(this.lblBCh1);
            this.pnlBCh1V.Controls.Add(this.picBCh1);
            this.pnlBCh1V.Dock = System.Windows.Forms.DockStyle.Fill;
            this.pnlBCh1V.Location = new System.Drawing.Point(3, 272);
            this.pnlBCh1V.Name = "pnlBCh1V";
            this.pnlBCh1V.Size = new System.Drawing.Size(381, 264);
            this.pnlBCh1V.TabIndex = 4;
            // 
            // button11
            // 
            this.button11.FlatStyle = System.Windows.Forms.FlatStyle.Flat;
            this.button11.Font = new System.Drawing.Font("宋体", 10.5F, System.Drawing.FontStyle.Regular, System.Drawing.GraphicsUnit.Point, ((byte)(134)));
            this.button11.ForeColor = System.Drawing.Color.FromArgb(((int)(((byte)(0)))), ((int)(((byte)(192)))), ((int)(((byte)(192)))));
            this.button11.Location = new System.Drawing.Point(0, 1);
            this.button11.Name = "button11";
            this.button11.Size = new System.Drawing.Size(75, 25);
            this.button11.TabIndex = 4;
            this.button11.Text = "更改纵轴";
            this.button11.UseVisualStyleBackColor = true;
            this.button11.Click += new System.EventHandler(this.button11_Click_1);
            // 
            // lblBCh1B
            // 
            this.lblBCh1B.AutoSize = true;
            this.lblBCh1B.BackColor = System.Drawing.SystemColors.Control;
            this.lblBCh1B.Font = new System.Drawing.Font("Times New Roman", 15F);
            this.lblBCh1B.Location = new System.Drawing.Point(206, 151);
            this.lblBCh1B.Name = "lblBCh1B";
            this.lblBCh1B.Size = new System.Drawing.Size(90, 22);
            this.lblBCh1B.TabIndex = 2;
            this.lblBCh1B.Text = "lblBCh1B";
            this.lblBCh1B.Visible = false;
            // 
            // lblBCh1
            // 
            this.lblBCh1.AutoSize = true;
            this.lblBCh1.BackColor = System.Drawing.SystemColors.Control;
            this.lblBCh1.Font = new System.Drawing.Font("Times New Roman", 10.5F);
            this.lblBCh1.Location = new System.Drawing.Point(106, 106);
            this.lblBCh1.Name = "lblBCh1";
            this.lblBCh1.Size = new System.Drawing.Size(52, 16);
            this.lblBCh1.TabIndex = 1;
            this.lblBCh1.Text = "lblBCh1";
            this.lblBCh1.Visible = false;
            // 
            // picBCh1
            // 
            // 
            // 
            // 
            this.picBCh1.Aspect.ZOffset = 0D;
            // 
            // 
            // 
            // 
            // 
            // 
            // 
            // 
            // 
            this.picBCh1.Axes.Bottom.Title.Caption = "个数/个";
            this.picBCh1.Axes.Bottom.Title.Lines = new string[] {
        "个数/个"};
            // 
            // 
            // 
            this.picBCh1.Axes.Left.Automatic = false;
            this.picBCh1.Axes.Left.AutomaticMaximum = false;
            this.picBCh1.Axes.Left.AutomaticMinimum = false;
            this.picBCh1.Axes.Left.Maximum = 60D;
            this.picBCh1.Axes.Left.Minimum = -10D;
            // 
            // 
            // 
            this.picBCh1.Axes.Left.Title.Caption = "电流/电压值";
            this.picBCh1.Axes.Left.Title.Lines = new string[] {
        "电流/电压值"};
            this.picBCh1.Dock = System.Windows.Forms.DockStyle.Fill;
            // 
            // 
            // 
            this.picBCh1.Header.Alignment = System.Drawing.StringAlignment.Far;
            // 
            // 
            // 
            // 
            // 
            // 
            this.picBCh1.Header.Font.Brush.Color = System.Drawing.Color.FromArgb(((int)(((byte)(0)))), ((int)(((byte)(0)))), ((int)(((byte)(0)))));
            this.picBCh1.Header.Lines = new string[] {
        "次接驳盒通道1电压/电流采集值曲线"};
            // 
            // 
            // 
            this.picBCh1.Legend.CheckBoxes = true;
            // 
            // 
            // 
            // 
            // 
            // 
            this.picBCh1.Legend.Font.Brush.Color = System.Drawing.Color.Red;
            this.picBCh1.Legend.FontSeriesColor = true;
            this.picBCh1.Legend.ResizeChart = false;
            this.picBCh1.Legend.Transparent = true;
            this.picBCh1.Location = new System.Drawing.Point(0, 0);
            this.picBCh1.Name = "picBCh1";
            // 
            // 
            // 
            // 
            // 
            // 
            // 
            // 
            // 
            this.picBCh1.Panel.Brush.Gradient.EndColor = System.Drawing.Color.FromArgb(((int)(((byte)(234)))), ((int)(((byte)(234)))), ((int)(((byte)(234)))));
            this.picBCh1.Panel.Brush.Gradient.UseMiddle = false;
            this.picBCh1.Series.Add(this.line21);
            this.picBCh1.Series.Add(this.line25);
            this.picBCh1.Size = new System.Drawing.Size(381, 264);
            this.picBCh1.TabIndex = 0;
            // 
            // 
            // 
            this.picBCh1.Walls.Visible = false;
            this.picBCh1.DoubleClick += new System.EventHandler(this.picBCh1_DoubleClick);
            this.picBCh1.MouseMove += new System.Windows.Forms.MouseEventHandler(this.picBCh1_MouseMove);
            // 
            // line21
            // 
            // 
            // 
            // 
            this.line21.Brush.Color = System.Drawing.Color.Blue;
            this.line21.Color = System.Drawing.Color.Blue;
            this.line21.ColorEach = false;
            // 
            // 
            // 
            this.line21.LinePen.Color = System.Drawing.Color.FromArgb(((int)(((byte)(41)))), ((int)(((byte)(61)))), ((int)(((byte)(98)))));
            this.line21.LinePen.Width = 2;
            // 
            // 
            // 
            // 
            // 
            // 
            this.line21.Marks.Callout.ArrowHead = Steema.TeeChart.Styles.ArrowHeadStyles.None;
            this.line21.Marks.Callout.ArrowHeadSize = 8;
            // 
            // 
            // 
            this.line21.Marks.Callout.Brush.Color = System.Drawing.Color.Black;
            this.line21.Marks.Callout.Distance = 0;
            this.line21.Marks.Callout.Draw3D = false;
            this.line21.Marks.Callout.Length = 10;
            this.line21.Marks.Callout.Style = Steema.TeeChart.Styles.PointerStyles.Rectangle;
            // 
            // 
            // 
            // 
            // 
            // 
            // 
            // 
            // 
            this.line21.Pointer.Brush.Gradient.Transparency = 100;
            this.line21.Pointer.Style = Steema.TeeChart.Styles.PointerStyles.Rectangle;
            this.line21.Title = "电流";
            // 
            // 
            // 
            this.line21.XValues.DataMember = "X";
            this.line21.XValues.Order = Steema.TeeChart.Styles.ValueListOrder.Ascending;
            // 
            // 
            // 
            this.line21.YValues.DataMember = "Y";
            // 
            // line25
            // 
            // 
            // 
            // 
            this.line25.Brush.Color = System.Drawing.Color.Red;
            this.line25.Color = System.Drawing.Color.Red;
            this.line25.ColorEach = false;
            // 
            // 
            // 
            this.line25.LinePen.Color = System.Drawing.Color.FromArgb(((int)(((byte)(146)))), ((int)(((byte)(94)))), ((int)(((byte)(32)))));
            this.line25.LinePen.Width = 2;
            // 
            // 
            // 
            // 
            // 
            // 
            this.line25.Marks.Callout.ArrowHead = Steema.TeeChart.Styles.ArrowHeadStyles.None;
            this.line25.Marks.Callout.ArrowHeadSize = 8;
            // 
            // 
            // 
            this.line25.Marks.Callout.Brush.Color = System.Drawing.Color.Black;
            this.line25.Marks.Callout.Distance = 0;
            this.line25.Marks.Callout.Draw3D = false;
            this.line25.Marks.Callout.Length = 10;
            this.line25.Marks.Callout.Style = Steema.TeeChart.Styles.PointerStyles.Rectangle;
            // 
            // 
            // 
            this.line25.Pointer.Style = Steema.TeeChart.Styles.PointerStyles.Rectangle;
            this.line25.Title = "电压";
            // 
            // 
            // 
            this.line25.XValues.DataMember = "X";
            this.line25.XValues.Order = Steema.TeeChart.Styles.ValueListOrder.Ascending;
            // 
            // 
            // 
            this.line25.YValues.DataMember = "Y";
            // 
            // pnlBCh1C
            // 
            this.pnlBCh1C.Controls.Add(this.button12);
            this.pnlBCh1C.Controls.Add(this.lblBCh2B);
            this.pnlBCh1C.Controls.Add(this.lblBCh2);
            this.pnlBCh1C.Controls.Add(this.picBCh2);
            this.pnlBCh1C.Dock = System.Windows.Forms.DockStyle.Fill;
            this.pnlBCh1C.Location = new System.Drawing.Point(390, 272);
            this.pnlBCh1C.Name = "pnlBCh1C";
            this.pnlBCh1C.Size = new System.Drawing.Size(381, 264);
            this.pnlBCh1C.TabIndex = 5;
            // 
            // button12
            // 
            this.button12.FlatStyle = System.Windows.Forms.FlatStyle.Flat;
            this.button12.Font = new System.Drawing.Font("宋体", 10.5F, System.Drawing.FontStyle.Regular, System.Drawing.GraphicsUnit.Point, ((byte)(134)));
            this.button12.ForeColor = System.Drawing.Color.FromArgb(((int)(((byte)(0)))), ((int)(((byte)(192)))), ((int)(((byte)(192)))));
            this.button12.Location = new System.Drawing.Point(0, 1);
            this.button12.Name = "button12";
            this.button12.Size = new System.Drawing.Size(75, 25);
            this.button12.TabIndex = 4;
            this.button12.Text = "更改纵轴";
            this.button12.UseVisualStyleBackColor = true;
            this.button12.Click += new System.EventHandler(this.button12_Click_1);
            // 
            // lblBCh2B
            // 
            this.lblBCh2B.AutoSize = true;
            this.lblBCh2B.BackColor = System.Drawing.SystemColors.Control;
            this.lblBCh2B.Font = new System.Drawing.Font("Times New Roman", 15F);
            this.lblBCh2B.Location = new System.Drawing.Point(195, 205);
            this.lblBCh2B.Name = "lblBCh2B";
            this.lblBCh2B.Size = new System.Drawing.Size(90, 22);
            this.lblBCh2B.TabIndex = 2;
            this.lblBCh2B.Text = "lblBCh2B";
            this.lblBCh2B.Visible = false;
            // 
            // lblBCh2
            // 
            this.lblBCh2.AutoSize = true;
            this.lblBCh2.BackColor = System.Drawing.SystemColors.Control;
            this.lblBCh2.Font = new System.Drawing.Font("Times New Roman", 10.5F);
            this.lblBCh2.Location = new System.Drawing.Point(119, 155);
            this.lblBCh2.Name = "lblBCh2";
            this.lblBCh2.Size = new System.Drawing.Size(52, 16);
            this.lblBCh2.TabIndex = 1;
            this.lblBCh2.Text = "lblBCh2";
            this.lblBCh2.Visible = false;
            // 
            // picBCh2
            // 
            // 
            // 
            // 
            this.picBCh2.Aspect.ZOffset = 0D;
            // 
            // 
            // 
            // 
            // 
            // 
            // 
            // 
            // 
            this.picBCh2.Axes.Bottom.Title.Caption = "个数/个";
            this.picBCh2.Axes.Bottom.Title.Lines = new string[] {
        "个数/个"};
            // 
            // 
            // 
            this.picBCh2.Axes.Left.Automatic = false;
            this.picBCh2.Axes.Left.AutomaticMaximum = false;
            this.picBCh2.Axes.Left.AutomaticMinimum = false;
            this.picBCh2.Axes.Left.Maximum = 60D;
            this.picBCh2.Axes.Left.Minimum = -10D;
            // 
            // 
            // 
            this.picBCh2.Axes.Left.Title.Caption = "电流/电压值";
            this.picBCh2.Axes.Left.Title.Lines = new string[] {
        "电流/电压值"};
            // 
            // 
            // 
            this.picBCh2.Axes.Top.Visible = false;
            this.picBCh2.Dock = System.Windows.Forms.DockStyle.Fill;
            // 
            // 
            // 
            this.picBCh2.Header.Alignment = System.Drawing.StringAlignment.Far;
            // 
            // 
            // 
            // 
            // 
            // 
            this.picBCh2.Header.Font.Brush.Color = System.Drawing.Color.FromArgb(((int)(((byte)(0)))), ((int)(((byte)(0)))), ((int)(((byte)(0)))));
            this.picBCh2.Header.Lines = new string[] {
        "次接驳盒通道2电压/电流采集值曲线"};
            // 
            // 
            // 
            this.picBCh2.Legend.CheckBoxes = true;
            // 
            // 
            // 
            // 
            // 
            // 
            this.picBCh2.Legend.Font.Brush.Color = System.Drawing.Color.Red;
            this.picBCh2.Legend.FontSeriesColor = true;
            this.picBCh2.Legend.ResizeChart = false;
            this.picBCh2.Legend.Transparent = true;
            this.picBCh2.Location = new System.Drawing.Point(0, 0);
            this.picBCh2.Name = "picBCh2";
            // 
            // 
            // 
            // 
            // 
            // 
            // 
            // 
            // 
            this.picBCh2.Panel.Brush.Gradient.EndColor = System.Drawing.Color.FromArgb(((int)(((byte)(234)))), ((int)(((byte)(234)))), ((int)(((byte)(234)))));
            this.picBCh2.Panel.Brush.Gradient.UseMiddle = false;
            this.picBCh2.Series.Add(this.line22);
            this.picBCh2.Series.Add(this.line26);
            this.picBCh2.Size = new System.Drawing.Size(381, 264);
            this.picBCh2.TabIndex = 0;
            // 
            // 
            // 
            this.picBCh2.Walls.Visible = false;
            this.picBCh2.DoubleClick += new System.EventHandler(this.picBCh2_DoubleClick);
            this.picBCh2.MouseMove += new System.Windows.Forms.MouseEventHandler(this.picBCh2_MouseMove);
            // 
            // line22
            // 
            // 
            // 
            // 
            this.line22.Brush.Color = System.Drawing.Color.Blue;
            this.line22.Color = System.Drawing.Color.Blue;
            this.line22.ColorEach = false;
            // 
            // 
            // 
            this.line22.LinePen.Color = System.Drawing.Color.FromArgb(((int)(((byte)(41)))), ((int)(((byte)(61)))), ((int)(((byte)(98)))));
            this.line22.LinePen.Width = 2;
            // 
            // 
            // 
            // 
            // 
            // 
            this.line22.Marks.Callout.ArrowHead = Steema.TeeChart.Styles.ArrowHeadStyles.None;
            this.line22.Marks.Callout.ArrowHeadSize = 8;
            // 
            // 
            // 
            this.line22.Marks.Callout.Brush.Color = System.Drawing.Color.Black;
            this.line22.Marks.Callout.Distance = 0;
            this.line22.Marks.Callout.Draw3D = false;
            this.line22.Marks.Callout.Length = 10;
            this.line22.Marks.Callout.Style = Steema.TeeChart.Styles.PointerStyles.Rectangle;
            // 
            // 
            // 
            // 
            // 
            // 
            // 
            // 
            // 
            this.line22.Pointer.Brush.Gradient.Transparency = 100;
            this.line22.Pointer.Style = Steema.TeeChart.Styles.PointerStyles.Rectangle;
            this.line22.Title = "电流";
            // 
            // 
            // 
            this.line22.XValues.DataMember = "X";
            this.line22.XValues.Order = Steema.TeeChart.Styles.ValueListOrder.Ascending;
            // 
            // 
            // 
            this.line22.YValues.DataMember = "Y";
            // 
            // line26
            // 
            // 
            // 
            // 
            this.line26.Brush.Color = System.Drawing.Color.Red;
            this.line26.Color = System.Drawing.Color.Red;
            this.line26.ColorEach = false;
            // 
            // 
            // 
            this.line26.LinePen.Color = System.Drawing.Color.FromArgb(((int)(((byte)(146)))), ((int)(((byte)(94)))), ((int)(((byte)(32)))));
            this.line26.LinePen.Width = 2;
            // 
            // 
            // 
            // 
            // 
            // 
            this.line26.Marks.Callout.ArrowHead = Steema.TeeChart.Styles.ArrowHeadStyles.None;
            this.line26.Marks.Callout.ArrowHeadSize = 8;
            // 
            // 
            // 
            this.line26.Marks.Callout.Brush.Color = System.Drawing.Color.Black;
            this.line26.Marks.Callout.Distance = 0;
            this.line26.Marks.Callout.Draw3D = false;
            this.line26.Marks.Callout.Length = 10;
            this.line26.Marks.Callout.Style = Steema.TeeChart.Styles.PointerStyles.Rectangle;
            // 
            // 
            // 
            this.line26.Pointer.Style = Steema.TeeChart.Styles.PointerStyles.Rectangle;
            this.line26.Title = "电压";
            // 
            // 
            // 
            this.line26.XValues.DataMember = "X";
            this.line26.XValues.Order = Steema.TeeChart.Styles.ValueListOrder.Ascending;
            // 
            // 
            // 
            this.line26.YValues.DataMember = "Y";
            // 
            // pnlBCh2V
            // 
            this.pnlBCh2V.Controls.Add(this.button13);
            this.pnlBCh2V.Controls.Add(this.lblTempB);
            this.pnlBCh2V.Controls.Add(this.lblTemp);
            this.pnlBCh2V.Controls.Add(this.picTemp);
            this.pnlBCh2V.Dock = System.Windows.Forms.DockStyle.Fill;
            this.pnlBCh2V.Location = new System.Drawing.Point(777, 272);
            this.pnlBCh2V.Name = "pnlBCh2V";
            this.pnlBCh2V.Size = new System.Drawing.Size(381, 264);
            this.pnlBCh2V.TabIndex = 6;
            // 
            // button13
            // 
            this.button13.FlatStyle = System.Windows.Forms.FlatStyle.Flat;
            this.button13.Font = new System.Drawing.Font("宋体", 10.5F, System.Drawing.FontStyle.Regular, System.Drawing.GraphicsUnit.Point, ((byte)(134)));
            this.button13.ForeColor = System.Drawing.Color.FromArgb(((int)(((byte)(0)))), ((int)(((byte)(192)))), ((int)(((byte)(192)))));
            this.button13.Location = new System.Drawing.Point(0, 1);
            this.button13.Name = "button13";
            this.button13.Size = new System.Drawing.Size(75, 25);
            this.button13.TabIndex = 4;
            this.button13.Text = "更改纵轴";
            this.button13.UseVisualStyleBackColor = true;
            this.button13.Click += new System.EventHandler(this.button13_Click_1);
            // 
            // lblTempB
            // 
            this.lblTempB.AutoSize = true;
            this.lblTempB.BackColor = System.Drawing.SystemColors.Control;
            this.lblTempB.Font = new System.Drawing.Font("Times New Roman", 15F);
            this.lblTempB.Location = new System.Drawing.Point(231, 201);
            this.lblTempB.Name = "lblTempB";
            this.lblTempB.Size = new System.Drawing.Size(89, 22);
            this.lblTempB.TabIndex = 2;
            this.lblTempB.Text = "lblTempB";
            this.lblTempB.Visible = false;
            // 
            // lblTemp
            // 
            this.lblTemp.AutoSize = true;
            this.lblTemp.BackColor = System.Drawing.SystemColors.Control;
            this.lblTemp.Font = new System.Drawing.Font("Times New Roman", 10.5F);
            this.lblTemp.Location = new System.Drawing.Point(149, 205);
            this.lblTemp.Name = "lblTemp";
            this.lblTemp.Size = new System.Drawing.Size(53, 16);
            this.lblTemp.TabIndex = 1;
            this.lblTemp.Text = "lblTemp";
            this.lblTemp.Visible = false;
            // 
            // picTemp
            // 
            // 
            // 
            // 
            this.picTemp.Aspect.ZOffset = 0D;
            // 
            // 
            // 
            // 
            // 
            // 
            this.picTemp.Axes.Bottom.MaximumOffset = 5;
            this.picTemp.Axes.Bottom.MinimumOffset = 5;
            // 
            // 
            // 
            this.picTemp.Axes.Bottom.Title.Caption = "个数/个";
            this.picTemp.Axes.Bottom.Title.Lines = new string[] {
        "个数/个"};
            // 
            // 
            // 
            this.picTemp.Axes.Left.Automatic = false;
            this.picTemp.Axes.Left.AutomaticMaximum = false;
            this.picTemp.Axes.Left.AutomaticMinimum = false;
            this.picTemp.Axes.Left.Maximum = 70D;
            this.picTemp.Axes.Left.Minimum = -10D;
            // 
            // 
            // 
            this.picTemp.Axes.Left.Title.Caption = "温度值（℃）";
            this.picTemp.Axes.Left.Title.Lines = new string[] {
        "温度值（℃）"};
            this.picTemp.Cursor = System.Windows.Forms.Cursors.Default;
            this.picTemp.Dock = System.Windows.Forms.DockStyle.Fill;
            // 
            // 
            // 
            this.picTemp.Header.Alignment = System.Drawing.StringAlignment.Far;
            // 
            // 
            // 
            // 
            // 
            // 
            this.picTemp.Header.Font.Brush.Color = System.Drawing.Color.FromArgb(((int)(((byte)(0)))), ((int)(((byte)(0)))), ((int)(((byte)(0)))));
            this.picTemp.Header.Lines = new string[] {
        "次接驳盒舱内温度采集值曲线"};
            // 
            // 
            // 
            // 
            // 
            // 
            this.picTemp.Legend.Brush.Color = System.Drawing.Color.FromArgb(((int)(((byte)(0)))), ((int)(((byte)(255)))), ((int)(((byte)(255)))), ((int)(((byte)(255)))));
            // 
            // 
            // 
            this.picTemp.Legend.Brush.Gradient.Transparency = 100;
            this.picTemp.Legend.CheckBoxes = true;
            // 
            // 
            // 
            this.picTemp.Legend.DividingLines.Width = 10;
            // 
            // 
            // 
            // 
            // 
            // 
            this.picTemp.Legend.Font.Brush.Color = System.Drawing.Color.Blue;
            this.picTemp.Legend.FontSeriesColor = true;
            // 
            // 
            // 
            this.picTemp.Legend.Pen.Visible = false;
            this.picTemp.Legend.ResizeChart = false;
            // 
            // 
            // 
            // 
            // 
            // 
            this.picTemp.Legend.Shadow.Brush.Color = System.Drawing.Color.FromArgb(((int)(((byte)(0)))), ((int)(((byte)(0)))), ((int)(((byte)(0)))), ((int)(((byte)(0)))));
            // 
            // 
            // 
            this.picTemp.Legend.Shadow.Brush.Gradient.Transparency = 100;
            this.picTemp.Legend.Shadow.Visible = false;
            this.picTemp.Legend.TextStyle = Steema.TeeChart.LegendTextStyles.Plain;
            this.picTemp.Location = new System.Drawing.Point(0, 0);
            this.picTemp.Name = "picTemp";
            // 
            // 
            // 
            // 
            // 
            // 
            // 
            // 
            // 
            this.picTemp.Panel.Brush.Gradient.EndColor = System.Drawing.Color.FromArgb(((int)(((byte)(234)))), ((int)(((byte)(234)))), ((int)(((byte)(234)))));
            this.picTemp.Panel.Brush.Gradient.UseMiddle = false;
            this.picTemp.Series.Add(this.line23);
            this.picTemp.Size = new System.Drawing.Size(381, 264);
            this.picTemp.TabIndex = 0;
            // 
            // 
            // 
            this.picTemp.Walls.Visible = false;
            this.picTemp.DoubleClick += new System.EventHandler(this.picBTemp_DoubleClick);
            this.picTemp.MouseMove += new System.Windows.Forms.MouseEventHandler(this.picBTemp_MouseMove);
            // 
            // line23
            // 
            // 
            // 
            // 
            this.line23.Brush.Color = System.Drawing.Color.Blue;
            this.line23.Color = System.Drawing.Color.Blue;
            this.line23.ColorEach = false;
            // 
            // 
            // 
            this.line23.LinePen.Color = System.Drawing.Color.FromArgb(((int)(((byte)(41)))), ((int)(((byte)(61)))), ((int)(((byte)(98)))));
            this.line23.LinePen.Width = 2;
            // 
            // 
            // 
            // 
            // 
            // 
            this.line23.Marks.Callout.ArrowHead = Steema.TeeChart.Styles.ArrowHeadStyles.None;
            this.line23.Marks.Callout.ArrowHeadSize = 8;
            // 
            // 
            // 
            this.line23.Marks.Callout.Brush.Color = System.Drawing.Color.Black;
            this.line23.Marks.Callout.Distance = 0;
            this.line23.Marks.Callout.Draw3D = false;
            this.line23.Marks.Callout.Length = 10;
            this.line23.Marks.Callout.Style = Steema.TeeChart.Styles.PointerStyles.Rectangle;
            // 
            // 
            // 
            // 
            // 
            // 
            // 
            // 
            // 
            this.line23.Pointer.Brush.Gradient.Transparency = 100;
            this.line23.Pointer.Style = Steema.TeeChart.Styles.PointerStyles.Rectangle;
            this.line23.Title = "次温度";
            // 
            // 
            // 
            this.line23.XValues.DataMember = "X";
            this.line23.XValues.Order = Steema.TeeChart.Styles.ValueListOrder.Ascending;
            // 
            // 
            // 
            this.line23.YValues.DataMember = "Y";
            // 
            // pnlACh1V
            // 
            this.pnlACh1V.Controls.Add(this.button8);
            this.pnlACh1V.Controls.Add(this.lblACh0);
            this.pnlACh1V.Controls.Add(this.lblACh0B);
            this.pnlACh1V.Controls.Add(this.picACh0);
            this.pnlACh1V.Dock = System.Windows.Forms.DockStyle.Fill;
            this.pnlACh1V.Location = new System.Drawing.Point(3, 3);
            this.pnlACh1V.Name = "pnlACh1V";
            this.pnlACh1V.Size = new System.Drawing.Size(381, 263);
            this.pnlACh1V.TabIndex = 7;
            // 
            // button8
            // 
            this.button8.FlatStyle = System.Windows.Forms.FlatStyle.Flat;
            this.button8.Font = new System.Drawing.Font("宋体", 10.5F, System.Drawing.FontStyle.Regular, System.Drawing.GraphicsUnit.Point, ((byte)(134)));
            this.button8.ForeColor = System.Drawing.Color.FromArgb(((int)(((byte)(0)))), ((int)(((byte)(192)))), ((int)(((byte)(192)))));
            this.button8.Location = new System.Drawing.Point(0, 1);
            this.button8.Name = "button8";
            this.button8.Size = new System.Drawing.Size(75, 25);
            this.button8.TabIndex = 3;
            this.button8.Text = "更改纵轴";
            this.button8.UseVisualStyleBackColor = true;
            this.button8.Click += new System.EventHandler(this.button8_Click_2);
            // 
            // lblACh0
            // 
            this.lblACh0.AutoSize = true;
            this.lblACh0.BackColor = System.Drawing.SystemColors.Control;
            this.lblACh0.Font = new System.Drawing.Font("Times New Roman", 10.5F);
            this.lblACh0.Location = new System.Drawing.Point(277, 146);
            this.lblACh0.Name = "lblACh0";
            this.lblACh0.Size = new System.Drawing.Size(53, 16);
            this.lblACh0.TabIndex = 1;
            this.lblACh0.Text = "lblACh0";
            // 
            // lblACh0B
            // 
            this.lblACh0B.AutoSize = true;
            this.lblACh0B.BackColor = System.Drawing.SystemColors.Control;
            this.lblACh0B.Font = new System.Drawing.Font("Times New Roman", 15F);
            this.lblACh0B.Location = new System.Drawing.Point(82, 166);
            this.lblACh0B.Name = "lblACh0B";
            this.lblACh0B.Size = new System.Drawing.Size(91, 22);
            this.lblACh0B.TabIndex = 2;
            this.lblACh0B.Text = "lblACh0B";
            this.lblACh0B.Visible = false;
            // 
            // picACh0
            // 
            // 
            // 
            // 
            this.picACh0.Aspect.ZOffset = 0D;
            // 
            // 
            // 
            // 
            // 
            // 
            // 
            // 
            // 
            this.picACh0.Axes.Bottom.Title.Caption = "个数/个";
            this.picACh0.Axes.Bottom.Title.Lines = new string[] {
        "个数/个"};
            // 
            // 
            // 
            this.picACh0.Axes.Left.Automatic = false;
            this.picACh0.Axes.Left.AutomaticMaximum = false;
            this.picACh0.Axes.Left.AutomaticMinimum = false;
            this.picACh0.Axes.Left.Maximum = 2300D;
            this.picACh0.Axes.Left.Minimum = -100D;
            // 
            // 
            // 
            this.picACh0.Axes.Left.Title.Caption = "电流/电压值";
            this.picACh0.Axes.Left.Title.Lines = new string[] {
        "电流/电压值"};
            // 
            // 
            // 
            this.picACh0.Axes.Right.Visible = false;
            this.picACh0.Cursor = System.Windows.Forms.Cursors.Default;
            this.picACh0.Dock = System.Windows.Forms.DockStyle.Fill;
            // 
            // 
            // 
            this.picACh0.Header.Alignment = System.Drawing.StringAlignment.Far;
            // 
            // 
            // 
            // 
            // 
            // 
            this.picACh0.Header.Font.Brush.Color = System.Drawing.Color.FromArgb(((int)(((byte)(0)))), ((int)(((byte)(0)))), ((int)(((byte)(0)))));
            this.picACh0.Header.Lines = new string[] {
        "主接驳盒前端电压/电流采集值曲线"};
            // 
            // 
            // 
            this.picACh0.Legend.CheckBoxes = true;
            // 
            // 
            // 
            // 
            // 
            // 
            this.picACh0.Legend.Font.Brush.Color = System.Drawing.Color.Red;
            this.picACh0.Legend.FontSeriesColor = true;
            this.picACh0.Legend.ResizeChart = false;
            this.picACh0.Legend.Transparent = true;
            this.picACh0.Location = new System.Drawing.Point(0, 0);
            this.picACh0.Name = "picACh0";
            // 
            // 
            // 
            // 
            // 
            // 
            // 
            // 
            // 
            this.picACh0.Panel.Brush.Gradient.EndColor = System.Drawing.Color.FromArgb(((int)(((byte)(234)))), ((int)(((byte)(234)))), ((int)(((byte)(234)))));
            this.picACh0.Panel.Brush.Gradient.UseMiddle = false;
            this.picACh0.Series.Add(this.line17);
            this.picACh0.Series.Add(this.line20);
            this.picACh0.Size = new System.Drawing.Size(381, 263);
            this.picACh0.TabIndex = 0;
            // 
            // 
            // 
            this.picACh0.Walls.Visible = false;
            this.picACh0.DoubleClick += new System.EventHandler(this.picACh1_DoubleClick);
            this.picACh0.MouseMove += new System.Windows.Forms.MouseEventHandler(this.picACh1_MouseMove);
            // 
            // line17
            // 
            // 
            // 
            // 
            this.line17.Brush.Color = System.Drawing.Color.Blue;
            this.line17.Color = System.Drawing.Color.Blue;
            this.line17.ColorEach = false;
            // 
            // 
            // 
            this.line17.LinePen.Color = System.Drawing.Color.FromArgb(((int)(((byte)(41)))), ((int)(((byte)(61)))), ((int)(((byte)(98)))));
            this.line17.LinePen.Width = 2;
            // 
            // 
            // 
            // 
            // 
            // 
            this.line17.Marks.Callout.ArrowHead = Steema.TeeChart.Styles.ArrowHeadStyles.None;
            this.line17.Marks.Callout.ArrowHeadSize = 8;
            // 
            // 
            // 
            this.line17.Marks.Callout.Brush.Color = System.Drawing.Color.Black;
            this.line17.Marks.Callout.Distance = 0;
            this.line17.Marks.Callout.Draw3D = false;
            this.line17.Marks.Callout.Length = 10;
            this.line17.Marks.Callout.Style = Steema.TeeChart.Styles.PointerStyles.Rectangle;
            // 
            // 
            // 
            // 
            // 
            // 
            // 
            // 
            // 
            this.line17.Pointer.Brush.Gradient.Transparency = 100;
            this.line17.Pointer.Style = Steema.TeeChart.Styles.PointerStyles.Rectangle;
            this.line17.Title = "电流";
            // 
            // 
            // 
            this.line17.XValues.DataMember = "X";
            this.line17.XValues.Order = Steema.TeeChart.Styles.ValueListOrder.Ascending;
            // 
            // 
            // 
            this.line17.YValues.DataMember = "Y";
            // 
            // line20
            // 
            // 
            // 
            // 
            this.line20.Brush.Color = System.Drawing.Color.Red;
            this.line20.Color = System.Drawing.Color.Red;
            this.line20.ColorEach = false;
            // 
            // 
            // 
            this.line20.LinePen.Color = System.Drawing.Color.FromArgb(((int)(((byte)(146)))), ((int)(((byte)(94)))), ((int)(((byte)(32)))));
            this.line20.LinePen.Width = 2;
            // 
            // 
            // 
            // 
            // 
            // 
            this.line20.Marks.Callout.ArrowHead = Steema.TeeChart.Styles.ArrowHeadStyles.None;
            this.line20.Marks.Callout.ArrowHeadSize = 8;
            // 
            // 
            // 
            this.line20.Marks.Callout.Brush.Color = System.Drawing.Color.Black;
            this.line20.Marks.Callout.Distance = 0;
            this.line20.Marks.Callout.Draw3D = false;
            this.line20.Marks.Callout.Length = 10;
            this.line20.Marks.Callout.Style = Steema.TeeChart.Styles.PointerStyles.Rectangle;
            // 
            // 
            // 
            this.line20.Pointer.Style = Steema.TeeChart.Styles.PointerStyles.Rectangle;
            this.line20.Title = "电压";
            // 
            // 
            // 
            this.line20.XValues.DataMember = "X";
            this.line20.XValues.Order = Steema.TeeChart.Styles.ValueListOrder.Ascending;
            // 
            // 
            // 
            this.line20.YValues.DataMember = "Y";
            // 
            // tabPage3
            // 
            this.tabPage3.BackColor = System.Drawing.Color.PowderBlue;
            this.tabPage3.Controls.Add(this.tableLayoutPanel3);
            this.tabPage3.Font = new System.Drawing.Font("Times New Roman", 14.25F);
            this.tabPage3.Location = new System.Drawing.Point(4, 30);
            this.tabPage3.Name = "tabPage3";
            this.tabPage3.Size = new System.Drawing.Size(1161, 539);
            this.tabPage3.TabIndex = 4;
            this.tabPage3.Text = "历史曲线";
            // 
            // tableLayoutPanel3
            // 
            this.tableLayoutPanel3.BackColor = System.Drawing.Color.White;
            this.tableLayoutPanel3.ColumnCount = 1;
            this.tableLayoutPanel3.ColumnStyles.Add(new System.Windows.Forms.ColumnStyle(System.Windows.Forms.SizeType.Percent, 100F));
            this.tableLayoutPanel3.Controls.Add(this.panel4, 0, 1);
            this.tableLayoutPanel3.Controls.Add(this.panel5, 0, 0);
            this.tableLayoutPanel3.Dock = System.Windows.Forms.DockStyle.Fill;
            this.tableLayoutPanel3.Location = new System.Drawing.Point(0, 0);
            this.tableLayoutPanel3.Name = "tableLayoutPanel3";
            this.tableLayoutPanel3.RowCount = 2;
            this.tableLayoutPanel3.RowStyles.Add(new System.Windows.Forms.RowStyle(System.Windows.Forms.SizeType.Percent, 15F));
            this.tableLayoutPanel3.RowStyles.Add(new System.Windows.Forms.RowStyle(System.Windows.Forms.SizeType.Percent, 85F));
            this.tableLayoutPanel3.Size = new System.Drawing.Size(1161, 539);
            this.tableLayoutPanel3.TabIndex = 0;
            // 
            // panel4
            // 
            this.panel4.Controls.Add(this.button15);
            this.panel4.Controls.Add(this.lblTotal);
            this.panel4.Controls.Add(this.totalPic);
            this.panel4.Dock = System.Windows.Forms.DockStyle.Fill;
            this.panel4.Location = new System.Drawing.Point(3, 83);
            this.panel4.Name = "panel4";
            this.panel4.Size = new System.Drawing.Size(1155, 453);
            this.panel4.TabIndex = 10;
            // 
            // button15
            // 
            this.button15.FlatStyle = System.Windows.Forms.FlatStyle.Popup;
            this.button15.Font = new System.Drawing.Font("宋体", 9F, System.Drawing.FontStyle.Regular, System.Drawing.GraphicsUnit.Point, ((byte)(134)));
            this.button15.ForeColor = System.Drawing.Color.FromArgb(((int)(((byte)(0)))), ((int)(((byte)(192)))), ((int)(((byte)(192)))));
            this.button15.Location = new System.Drawing.Point(0, 0);
            this.button15.Name = "button15";
            this.button15.Size = new System.Drawing.Size(75, 25);
            this.button15.TabIndex = 11;
            this.button15.Text = "更改坐标";
            this.button15.UseVisualStyleBackColor = true;
            this.button15.Click += new System.EventHandler(this.button15_Click);
            // 
            // lblTotal
            // 
            this.lblTotal.AutoSize = true;
            this.lblTotal.Font = new System.Drawing.Font("Times New Roman", 15F, System.Drawing.FontStyle.Regular, System.Drawing.GraphicsUnit.Point, ((byte)(0)));
            this.lblTotal.Location = new System.Drawing.Point(17, 42);
            this.lblTotal.Name = "lblTotal";
            this.lblTotal.Size = new System.Drawing.Size(50, 22);
            this.lblTotal.TabIndex = 10;
            this.lblTotal.Text = "陈杰";
            // 
            // totalPic
            // 
            // 
            // 
            // 
            this.totalPic.Aspect.ZOffset = 0D;
            // 
            // 
            // 
            // 
            // 
            // 
            // 
            // 
            // 
            this.totalPic.Axes.Bottom.Title.Caption = "个数/个";
            this.totalPic.Axes.Bottom.Title.Lines = new string[] {
        "个数/个"};
            // 
            // 
            // 
            this.totalPic.Axes.Left.Automatic = false;
            this.totalPic.Axes.Left.AutomaticMaximum = false;
            this.totalPic.Axes.Left.AutomaticMinimum = false;
            this.totalPic.Axes.Left.Maximum = 100D;
            this.totalPic.Axes.Left.Minimum = 0D;
            // 
            // 
            // 
            this.totalPic.Axes.Left.Title.Caption = "采集值";
            this.totalPic.Axes.Left.Title.Lines = new string[] {
        "采集值"};
            this.totalPic.BackColor = System.Drawing.Color.White;
            this.totalPic.Cursor = System.Windows.Forms.Cursors.Default;
            this.totalPic.Dock = System.Windows.Forms.DockStyle.Fill;
            // 
            // 
            // 
            // 
            // 
            // 
            this.totalPic.Header.Font.Size = 10;
            this.totalPic.Header.Font.SizeFloat = 10F;
            this.totalPic.Header.Lines = new string[] {
        "历史曲线"};
            this.totalPic.Location = new System.Drawing.Point(0, 0);
            this.totalPic.Name = "totalPic";
            // 
            // 
            // 
            // 
            // 
            // 
            this.totalPic.Panel.Brush.Color = System.Drawing.Color.FromArgb(((int)(((byte)(0)))), ((int)(((byte)(0)))), ((int)(((byte)(0)))));
            // 
            // 
            // 
            this.totalPic.Panel.Brush.Gradient.StartColor = System.Drawing.Color.FromArgb(((int)(((byte)(255)))), ((int)(((byte)(255)))), ((int)(((byte)(255)))));
            this.totalPic.Panel.Brush.Gradient.UseMiddle = false;
            this.totalPic.Series.Add(this.line16);
            this.totalPic.Size = new System.Drawing.Size(1155, 453);
            this.totalPic.TabIndex = 0;
            // 
            // 
            // 
            // 
            // 
            // 
            // 
            // 
            // 
            this.totalPic.Walls.Back.Brush.Color = System.Drawing.Color.FromArgb(((int)(((byte)(255)))), ((int)(((byte)(255)))), ((int)(((byte)(255)))));
            this.totalPic.Walls.Back.Visible = false;
            // 
            // 
            // 
            this.totalPic.Walls.Bottom.Visible = false;
            // 
            // 
            // 
            this.totalPic.Walls.Left.Visible = false;
            this.totalPic.MouseClick += new System.Windows.Forms.MouseEventHandler(this.totalPic_MouseClick);
            this.totalPic.MouseDoubleClick += new System.Windows.Forms.MouseEventHandler(this.totalPic_MouseDoubleClick);
            this.totalPic.MouseMove += new System.Windows.Forms.MouseEventHandler(this.totalPic_MouseMove);
            // 
            // line16
            // 
            // 
            // 
            // 
            this.line16.Brush.Color = System.Drawing.Color.Blue;
            this.line16.Color = System.Drawing.Color.Blue;
            this.line16.ColorEach = false;
            // 
            // 
            // 
            this.line16.LinePen.Color = System.Drawing.Color.FromArgb(((int)(((byte)(41)))), ((int)(((byte)(61)))), ((int)(((byte)(98)))));
            this.line16.LinePen.Width = 2;
            // 
            // 
            // 
            // 
            // 
            // 
            this.line16.Marks.Callout.ArrowHead = Steema.TeeChart.Styles.ArrowHeadStyles.None;
            this.line16.Marks.Callout.ArrowHeadSize = 8;
            // 
            // 
            // 
            this.line16.Marks.Callout.Brush.Color = System.Drawing.Color.Black;
            this.line16.Marks.Callout.Distance = 0;
            this.line16.Marks.Callout.Draw3D = false;
            this.line16.Marks.Callout.Length = 10;
            this.line16.Marks.Callout.Style = Steema.TeeChart.Styles.PointerStyles.Rectangle;
            // 
            // 
            // 
            // 
            // 
            // 
            // 
            // 
            // 
            this.line16.Pointer.Brush.Gradient.Transparency = 100;
            this.line16.Pointer.Style = Steema.TeeChart.Styles.PointerStyles.Rectangle;
            this.line16.ShowInLegend = false;
            this.line16.Title = "line1";
            // 
            // 
            // 
            this.line16.XValues.DataMember = "X";
            this.line16.XValues.Order = Steema.TeeChart.Styles.ValueListOrder.Ascending;
            // 
            // 
            // 
            this.line16.YValues.DataMember = "Y";
            // 
            // panel5
            // 
            this.panel5.AutoScroll = true;
            this.panel5.BackColor = System.Drawing.Color.White;
            this.panel5.Controls.Add(this.groupBox8);
            this.panel5.Dock = System.Windows.Forms.DockStyle.Fill;
            this.panel5.Location = new System.Drawing.Point(3, 3);
            this.panel5.Name = "panel5";
            this.panel5.Size = new System.Drawing.Size(1155, 74);
            this.panel5.TabIndex = 11;
            // 
            // groupBox8
            // 
            this.groupBox8.BackColor = System.Drawing.Color.FromArgb(((int)(((byte)(207)))), ((int)(((byte)(221)))), ((int)(((byte)(238)))));
            this.groupBox8.Controls.Add(this.button6);
            this.groupBox8.Controls.Add(this.picEndTime);
            this.groupBox8.Controls.Add(this.pictureType);
            this.groupBox8.Controls.Add(this.picStartTime);
            this.groupBox8.Controls.Add(this.label3);
            this.groupBox8.Controls.Add(this.label13);
            this.groupBox8.Controls.Add(this.label11);
            this.groupBox8.Dock = System.Windows.Forms.DockStyle.Fill;
            this.groupBox8.Location = new System.Drawing.Point(0, 0);
            this.groupBox8.Name = "groupBox8";
            this.groupBox8.Size = new System.Drawing.Size(1155, 74);
            this.groupBox8.TabIndex = 0;
            this.groupBox8.TabStop = false;
            this.groupBox8.Paint += new System.Windows.Forms.PaintEventHandler(this.groupBox8_Paint);
            // 
            // button6
            // 
            this.button6.BackColor = System.Drawing.Color.FromArgb(((int)(((byte)(217)))), ((int)(((byte)(230)))), ((int)(((byte)(244)))));
            this.button6.FlatStyle = System.Windows.Forms.FlatStyle.Flat;
            this.button6.Font = new System.Drawing.Font("宋体", 12F, System.Drawing.FontStyle.Regular, System.Drawing.GraphicsUnit.Point, ((byte)(134)));
            this.button6.ForeColor = System.Drawing.Color.Black;
            this.button6.Location = new System.Drawing.Point(1031, 23);
            this.button6.Name = "button6";
            this.button6.Size = new System.Drawing.Size(101, 35);
            this.button6.TabIndex = 9;
            this.button6.Text = "曲线绘制";
            this.button6.UseVisualStyleBackColor = false;
            this.button6.Click += new System.EventHandler(this.button6_Click);
            // 
            // picEndTime
            // 
            this.picEndTime.Font = new System.Drawing.Font("Times New Roman", 14.25F);
            this.picEndTime.Location = new System.Drawing.Point(761, 25);
            this.picEndTime.Name = "picEndTime";
            this.picEndTime.Size = new System.Drawing.Size(264, 29);
            this.picEndTime.TabIndex = 8;
            this.picEndTime.Value = new System.DateTime(2016, 10, 14, 23, 59, 0, 0);
            // 
            // pictureType
            // 
            this.pictureType.DropDownStyle = System.Windows.Forms.ComboBoxStyle.DropDownList;
            this.pictureType.Font = new System.Drawing.Font("宋体", 14.25F, System.Drawing.FontStyle.Regular, System.Drawing.GraphicsUnit.Point, ((byte)(134)));
            this.pictureType.FormattingEnabled = true;
            this.pictureType.Items.AddRange(new object[] {
            "主接驳盒前端电压",
            "主接驳盒前端电流",
            "主接驳盒后端通道1电压",
            "主接驳盒后端通道1电流",
            "主接驳盒后端通道2电压",
            "主接驳盒后端通道2电流",
            "主接驳盒舱体温度",
            "次接驳盒通道1电压",
            "次接驳盒通道1电流",
            "次接驳盒通道2电压",
            "次接驳盒通道2电流",
            "次接驳盒舱体温度",
            "数据采集器通道1电压",
            "数据采集器通道1电流",
            "数据采集器通道2电压",
            "数据采集器通道2电流",
            "数据采集器通道3电压",
            "数据采集器通道3电流",
            "数据采集器通道4电压",
            "数据采集器通道4电流",
            "数据采集器通道5电压",
            "数据采集器通道5电流",
            "数据采集器舱内温度",
            "溶解氧",
            "PH",
            "叶绿素",
            "浊度",
            "CTD-温度",
            "CTD-盐度",
            "CTD-深度",
            "CTD-电导率"});
            this.pictureType.Location = new System.Drawing.Point(63, 27);
            this.pictureType.Name = "pictureType";
            this.pictureType.Size = new System.Drawing.Size(235, 27);
            this.pictureType.TabIndex = 4;
            // 
            // picStartTime
            // 
            this.picStartTime.Font = new System.Drawing.Font("Times New Roman", 14.25F);
            this.picStartTime.Location = new System.Drawing.Point(390, 25);
            this.picStartTime.Name = "picStartTime";
            this.picStartTime.Size = new System.Drawing.Size(264, 29);
            this.picStartTime.TabIndex = 6;
            this.picStartTime.Value = new System.DateTime(2016, 10, 14, 0, 0, 0, 0);
            // 
            // label3
            // 
            this.label3.AutoSize = true;
            this.label3.Font = new System.Drawing.Font("宋体", 14.25F, System.Drawing.FontStyle.Regular, System.Drawing.GraphicsUnit.Point, ((byte)(134)));
            this.label3.Location = new System.Drawing.Point(7, 31);
            this.label3.Name = "label3";
            this.label3.Size = new System.Drawing.Size(57, 19);
            this.label3.TabIndex = 3;
            this.label3.Text = "类型:";
            // 
            // label13
            // 
            this.label13.AutoSize = true;
            this.label13.Font = new System.Drawing.Font("宋体", 14.25F, System.Drawing.FontStyle.Regular, System.Drawing.GraphicsUnit.Point, ((byte)(134)));
            this.label13.Location = new System.Drawing.Point(660, 30);
            this.label13.Name = "label13";
            this.label13.Size = new System.Drawing.Size(95, 19);
            this.label13.TabIndex = 7;
            this.label13.Text = "终止时间:";
            // 
            // label11
            // 
            this.label11.AutoSize = true;
            this.label11.Font = new System.Drawing.Font("宋体", 14.25F, System.Drawing.FontStyle.Regular, System.Drawing.GraphicsUnit.Point, ((byte)(134)));
            this.label11.Location = new System.Drawing.Point(301, 31);
            this.label11.Name = "label11";
            this.label11.Size = new System.Drawing.Size(95, 19);
            this.label11.TabIndex = 5;
            this.label11.Text = "起始时间:";
            // 
            // tabPage1
            // 
            this.tabPage1.BackColor = System.Drawing.SystemColors.Control;
            this.tabPage1.Controls.Add(this.tableLayoutPanel5);
            this.tabPage1.Font = new System.Drawing.Font("Times New Roman", 14.25F);
            this.tabPage1.Location = new System.Drawing.Point(4, 30);
            this.tabPage1.Name = "tabPage1";
            this.tabPage1.Size = new System.Drawing.Size(1161, 539);
            this.tabPage1.TabIndex = 2;
            this.tabPage1.Text = "数据列表";
            // 
            // tableLayoutPanel5
            // 
            this.tableLayoutPanel5.ColumnCount = 1;
            this.tableLayoutPanel5.ColumnStyles.Add(new System.Windows.Forms.ColumnStyle(System.Windows.Forms.SizeType.Percent, 100F));
            this.tableLayoutPanel5.Controls.Add(this.dgwData, 0, 1);
            this.tableLayoutPanel5.Controls.Add(this.panel3, 0, 0);
            this.tableLayoutPanel5.Dock = System.Windows.Forms.DockStyle.Fill;
            this.tableLayoutPanel5.Location = new System.Drawing.Point(0, 0);
            this.tableLayoutPanel5.Name = "tableLayoutPanel5";
            this.tableLayoutPanel5.RowCount = 2;
            this.tableLayoutPanel5.RowStyles.Add(new System.Windows.Forms.RowStyle(System.Windows.Forms.SizeType.Percent, 15F));
            this.tableLayoutPanel5.RowStyles.Add(new System.Windows.Forms.RowStyle(System.Windows.Forms.SizeType.Percent, 85F));
            this.tableLayoutPanel5.Size = new System.Drawing.Size(1161, 539);
            this.tableLayoutPanel5.TabIndex = 0;
            // 
            // dgwData
            // 
            dataGridViewCellStyle16.BackColor = System.Drawing.Color.LightCyan;
            this.dgwData.AlternatingRowsDefaultCellStyle = dataGridViewCellStyle16;
            this.dgwData.AutoSizeColumnsMode = System.Windows.Forms.DataGridViewAutoSizeColumnsMode.Fill;
            this.dgwData.BackgroundColor = System.Drawing.Color.White;
            dataGridViewCellStyle17.Alignment = System.Windows.Forms.DataGridViewContentAlignment.MiddleLeft;
            dataGridViewCellStyle17.BackColor = System.Drawing.Color.FromArgb(((int)(((byte)(234)))), ((int)(((byte)(242)))), ((int)(((byte)(250)))));
            dataGridViewCellStyle17.Font = new System.Drawing.Font("Times New Roman", 14.25F);
            dataGridViewCellStyle17.ForeColor = System.Drawing.SystemColors.WindowText;
            dataGridViewCellStyle17.SelectionBackColor = System.Drawing.SystemColors.Highlight;
            dataGridViewCellStyle17.SelectionForeColor = System.Drawing.SystemColors.HighlightText;
            dataGridViewCellStyle17.WrapMode = System.Windows.Forms.DataGridViewTriState.True;
            this.dgwData.ColumnHeadersDefaultCellStyle = dataGridViewCellStyle17;
            this.dgwData.ColumnHeadersHeightSizeMode = System.Windows.Forms.DataGridViewColumnHeadersHeightSizeMode.AutoSize;
            dataGridViewCellStyle18.Alignment = System.Windows.Forms.DataGridViewContentAlignment.MiddleLeft;
            dataGridViewCellStyle18.BackColor = System.Drawing.Color.FromArgb(((int)(((byte)(251)))), ((int)(((byte)(251)))), ((int)(((byte)(243)))));
            dataGridViewCellStyle18.Font = new System.Drawing.Font("Times New Roman", 14.25F);
            dataGridViewCellStyle18.ForeColor = System.Drawing.SystemColors.ControlText;
            dataGridViewCellStyle18.SelectionBackColor = System.Drawing.Color.FromArgb(((int)(((byte)(213)))), ((int)(((byte)(232)))), ((int)(((byte)(255)))));
            dataGridViewCellStyle18.SelectionForeColor = System.Drawing.Color.Black;
            dataGridViewCellStyle18.WrapMode = System.Windows.Forms.DataGridViewTriState.False;
            this.dgwData.DefaultCellStyle = dataGridViewCellStyle18;
            this.dgwData.Dock = System.Windows.Forms.DockStyle.Fill;
            this.dgwData.EnableHeadersVisualStyles = false;
            this.dgwData.Location = new System.Drawing.Point(3, 83);
            this.dgwData.Name = "dgwData";
            this.dgwData.RowTemplate.Height = 23;
            this.dgwData.Size = new System.Drawing.Size(1155, 453);
            this.dgwData.TabIndex = 3;
            this.dgwData.RowPostPaint += new System.Windows.Forms.DataGridViewRowPostPaintEventHandler(this.dgwData_RowPostPaint);
            // 
            // panel3
            // 
            this.panel3.AutoScroll = true;
            this.panel3.BackColor = System.Drawing.Color.White;
            this.panel3.Controls.Add(this.groupBox1);
            this.panel3.Dock = System.Windows.Forms.DockStyle.Fill;
            this.panel3.Location = new System.Drawing.Point(3, 3);
            this.panel3.Name = "panel3";
            this.panel3.Size = new System.Drawing.Size(1155, 74);
            this.panel3.TabIndex = 4;
            // 
            // groupBox1
            // 
            this.groupBox1.BackColor = System.Drawing.Color.FromArgb(((int)(((byte)(207)))), ((int)(((byte)(221)))), ((int)(((byte)(238)))));
            this.groupBox1.Controls.Add(this.button17);
            this.groupBox1.Controls.Add(this.button5);
            this.groupBox1.Controls.Add(this.label20);
            this.groupBox1.Controls.Add(this.searchEndTime);
            this.groupBox1.Controls.Add(this.dataType);
            this.groupBox1.Controls.Add(this.label37);
            this.groupBox1.Controls.Add(this.label23);
            this.groupBox1.Controls.Add(this.searchStartTime);
            this.groupBox1.Dock = System.Windows.Forms.DockStyle.Fill;
            this.groupBox1.ForeColor = System.Drawing.Color.Black;
            this.groupBox1.Location = new System.Drawing.Point(0, 0);
            this.groupBox1.Name = "groupBox1";
            this.groupBox1.Size = new System.Drawing.Size(1155, 74);
            this.groupBox1.TabIndex = 0;
            this.groupBox1.TabStop = false;
            this.groupBox1.Paint += new System.Windows.Forms.PaintEventHandler(this.groupBox1_Paint);
            // 
            // button17
            // 
            this.button17.BackColor = System.Drawing.Color.FromArgb(((int)(((byte)(207)))), ((int)(((byte)(221)))), ((int)(((byte)(238)))));
            this.button17.FlatStyle = System.Windows.Forms.FlatStyle.Flat;
            this.button17.Font = new System.Drawing.Font("宋体", 12F, System.Drawing.FontStyle.Regular, System.Drawing.GraphicsUnit.Point, ((byte)(134)));
            this.button17.ForeColor = System.Drawing.Color.Black;
            this.button17.Location = new System.Drawing.Point(1070, 25);
            this.button17.Name = "button17";
            this.button17.Size = new System.Drawing.Size(79, 35);
            this.button17.TabIndex = 8;
            this.button17.Text = "导出";
            this.button17.UseVisualStyleBackColor = false;
            this.button17.Click += new System.EventHandler(this.button17_Click);
            // 
            // button5
            // 
            this.button5.BackColor = System.Drawing.Color.FromArgb(((int)(((byte)(207)))), ((int)(((byte)(221)))), ((int)(((byte)(238)))));
            this.button5.FlatStyle = System.Windows.Forms.FlatStyle.Flat;
            this.button5.Font = new System.Drawing.Font("宋体", 12F, System.Drawing.FontStyle.Regular, System.Drawing.GraphicsUnit.Point, ((byte)(134)));
            this.button5.ForeColor = System.Drawing.Color.Black;
            this.button5.Location = new System.Drawing.Point(985, 25);
            this.button5.Name = "button5";
            this.button5.Size = new System.Drawing.Size(79, 35);
            this.button5.TabIndex = 7;
            this.button5.Text = "查询";
            this.button5.UseVisualStyleBackColor = false;
            this.button5.Click += new System.EventHandler(this.button5_Click);
            // 
            // label20
            // 
            this.label20.AutoSize = true;
            this.label20.Font = new System.Drawing.Font("宋体", 14.25F, System.Drawing.FontStyle.Regular, System.Drawing.GraphicsUnit.Point, ((byte)(134)));
            this.label20.Location = new System.Drawing.Point(5, 31);
            this.label20.Name = "label20";
            this.label20.Size = new System.Drawing.Size(57, 19);
            this.label20.TabIndex = 2;
            this.label20.Text = "类型:";
            // 
            // searchEndTime
            // 
            this.searchEndTime.Font = new System.Drawing.Font("宋体", 14.25F, System.Drawing.FontStyle.Regular, System.Drawing.GraphicsUnit.Point, ((byte)(134)));
            this.searchEndTime.Location = new System.Drawing.Point(732, 27);
            this.searchEndTime.Name = "searchEndTime";
            this.searchEndTime.Size = new System.Drawing.Size(220, 29);
            this.searchEndTime.TabIndex = 5;
            this.searchEndTime.Value = new System.DateTime(2016, 10, 14, 23, 59, 0, 0);
            // 
            // dataType
            // 
            this.dataType.BackColor = System.Drawing.Color.White;
            this.dataType.DropDownStyle = System.Windows.Forms.ComboBoxStyle.DropDownList;
            this.dataType.Font = new System.Drawing.Font("宋体", 14.25F, System.Drawing.FontStyle.Regular, System.Drawing.GraphicsUnit.Point, ((byte)(134)));
            this.dataType.FormattingEnabled = true;
            this.dataType.Items.AddRange(new object[] {
            "主接驳盒状态数据",
            "",
            "主接驳盒故障数据",
            "",
            "次接驳盒状态数据",
            "",
            "次接驳盒故障数据",
            "",
            "数据采集器故障数据",
            "",
            "数据采集器电参数数据",
            "",
            "数据采集舱内温度数据",
            "",
            "溶解氧数据",
            "",
            "PH数据",
            "",
            "叶绿素浊度数据",
            "",
            "CTD数据"});
            this.dataType.Location = new System.Drawing.Point(63, 27);
            this.dataType.Name = "dataType";
            this.dataType.Size = new System.Drawing.Size(214, 27);
            this.dataType.TabIndex = 3;
            // 
            // label37
            // 
            this.label37.AutoSize = true;
            this.label37.Font = new System.Drawing.Font("宋体", 14.25F, System.Drawing.FontStyle.Regular, System.Drawing.GraphicsUnit.Point, ((byte)(134)));
            this.label37.Location = new System.Drawing.Point(616, 31);
            this.label37.Name = "label37";
            this.label37.Size = new System.Drawing.Size(95, 19);
            this.label37.TabIndex = 4;
            this.label37.Text = "终止时间:";
            // 
            // label23
            // 
            this.label23.AutoSize = true;
            this.label23.Font = new System.Drawing.Font("宋体", 14.25F, System.Drawing.FontStyle.Regular, System.Drawing.GraphicsUnit.Point, ((byte)(134)));
            this.label23.Location = new System.Drawing.Point(278, 31);
            this.label23.Name = "label23";
            this.label23.Size = new System.Drawing.Size(95, 19);
            this.label23.TabIndex = 4;
            this.label23.Text = "起始时间:";
            // 
            // searchStartTime
            // 
            this.searchStartTime.Font = new System.Drawing.Font("宋体", 14.25F, System.Drawing.FontStyle.Regular, System.Drawing.GraphicsUnit.Point, ((byte)(134)));
            this.searchStartTime.Location = new System.Drawing.Point(379, 25);
            this.searchStartTime.Name = "searchStartTime";
            this.searchStartTime.Size = new System.Drawing.Size(220, 29);
            this.searchStartTime.TabIndex = 5;
            this.searchStartTime.Value = new System.DateTime(2016, 10, 14, 0, 0, 0, 0);
            // 
            // sysInfo
            // 
            this.sysInfo.BackColor = System.Drawing.SystemColors.Control;
            this.sysInfo.Controls.Add(this.tableLayoutPanel4);
            this.sysInfo.Font = new System.Drawing.Font("Times New Roman", 14.25F);
            this.sysInfo.Location = new System.Drawing.Point(4, 30);
            this.sysInfo.Name = "sysInfo";
            this.sysInfo.Padding = new System.Windows.Forms.Padding(3);
            this.sysInfo.Size = new System.Drawing.Size(1161, 539);
            this.sysInfo.TabIndex = 0;
            this.sysInfo.Text = "接驳盒状态信息";
            // 
            // tableLayoutPanel4
            // 
            this.tableLayoutPanel4.AutoScroll = true;
            this.tableLayoutPanel4.AutoSizeMode = System.Windows.Forms.AutoSizeMode.GrowAndShrink;
            this.tableLayoutPanel4.BackColor = System.Drawing.SystemColors.Control;
            this.tableLayoutPanel4.ColumnCount = 3;
            this.tableLayoutPanel4.ColumnStyles.Add(new System.Windows.Forms.ColumnStyle(System.Windows.Forms.SizeType.Percent, 42.68398F));
            this.tableLayoutPanel4.ColumnStyles.Add(new System.Windows.Forms.ColumnStyle(System.Windows.Forms.SizeType.Percent, 0.6926407F));
            this.tableLayoutPanel4.ColumnStyles.Add(new System.Windows.Forms.ColumnStyle(System.Windows.Forms.SizeType.Percent, 56.5368F));
            this.tableLayoutPanel4.Controls.Add(this.pnlNet, 0, 2);
            this.tableLayoutPanel4.Controls.Add(this.pnlControl, 2, 0);
            this.tableLayoutPanel4.Controls.Add(this.panel12, 0, 0);
            this.tableLayoutPanel4.Dock = System.Windows.Forms.DockStyle.Fill;
            this.tableLayoutPanel4.Location = new System.Drawing.Point(3, 3);
            this.tableLayoutPanel4.Name = "tableLayoutPanel4";
            this.tableLayoutPanel4.RowCount = 3;
            this.tableLayoutPanel4.RowStyles.Add(new System.Windows.Forms.RowStyle(System.Windows.Forms.SizeType.Percent, 16.13508F));
            this.tableLayoutPanel4.RowStyles.Add(new System.Windows.Forms.RowStyle(System.Windows.Forms.SizeType.Percent, 9.380863F));
            this.tableLayoutPanel4.RowStyles.Add(new System.Windows.Forms.RowStyle(System.Windows.Forms.SizeType.Percent, 74.67167F));
            this.tableLayoutPanel4.Size = new System.Drawing.Size(1155, 533);
            this.tableLayoutPanel4.TabIndex = 0;
            // 
            // pnlNet
            // 
            this.pnlNet.Controls.Add(this.tableLayoutPanel8);
            this.pnlNet.Dock = System.Windows.Forms.DockStyle.Fill;
            this.pnlNet.Location = new System.Drawing.Point(3, 137);
            this.pnlNet.Name = "pnlNet";
            this.pnlNet.Size = new System.Drawing.Size(487, 393);
            this.pnlNet.TabIndex = 11;
            // 
            // tableLayoutPanel8
            // 
            this.tableLayoutPanel8.ColumnCount = 1;
            this.tableLayoutPanel8.ColumnStyles.Add(new System.Windows.Forms.ColumnStyle(System.Windows.Forms.SizeType.Percent, 50F));
            this.tableLayoutPanel8.Controls.Add(this.groupBox4, 0, 0);
            this.tableLayoutPanel8.Controls.Add(this.groupBox24, 0, 1);
            this.tableLayoutPanel8.Dock = System.Windows.Forms.DockStyle.Fill;
            this.tableLayoutPanel8.Location = new System.Drawing.Point(0, 0);
            this.tableLayoutPanel8.Name = "tableLayoutPanel8";
            this.tableLayoutPanel8.RowCount = 2;
            this.tableLayoutPanel8.RowStyles.Add(new System.Windows.Forms.RowStyle(System.Windows.Forms.SizeType.Percent, 33.07888F));
            this.tableLayoutPanel8.RowStyles.Add(new System.Windows.Forms.RowStyle(System.Windows.Forms.SizeType.Percent, 66.92112F));
            this.tableLayoutPanel8.Size = new System.Drawing.Size(487, 393);
            this.tableLayoutPanel8.TabIndex = 0;
            // 
            // groupBox4
            // 
            this.groupBox4.Controls.Add(this.button19);
            this.groupBox4.Controls.Add(this.canAConnect);
            this.groupBox4.Controls.Add(this.txtAIP);
            this.groupBox4.Controls.Add(this.txtAPort);
            this.groupBox4.Controls.Add(this.label115);
            this.groupBox4.Controls.Add(this.button2);
            this.groupBox4.Controls.Add(this.label38);
            this.groupBox4.Controls.Add(this.canBConnect);
            this.groupBox4.Controls.Add(this.label18);
            this.groupBox4.Controls.Add(this.label22);
            this.groupBox4.Controls.Add(this.txtBIP);
            this.groupBox4.Controls.Add(this.txtBPort);
            this.groupBox4.Controls.Add(this.label19);
            this.groupBox4.Dock = System.Windows.Forms.DockStyle.Fill;
            this.groupBox4.Font = new System.Drawing.Font("宋体", 14.25F, System.Drawing.FontStyle.Bold);
            this.groupBox4.ForeColor = System.Drawing.Color.Maroon;
            this.groupBox4.Location = new System.Drawing.Point(3, 3);
            this.groupBox4.Name = "groupBox4";
            this.groupBox4.Size = new System.Drawing.Size(481, 123);
            this.groupBox4.TabIndex = 0;
            this.groupBox4.TabStop = false;
            this.groupBox4.Text = "网络控制";
            // 
            // button19
            // 
            this.button19.FlatStyle = System.Windows.Forms.FlatStyle.Flat;
            this.button19.Font = new System.Drawing.Font("楷体", 12F, System.Drawing.FontStyle.Regular, System.Drawing.GraphicsUnit.Point, ((byte)(134)));
            this.button19.ForeColor = System.Drawing.Color.FromArgb(((int)(((byte)(0)))), ((int)(((byte)(192)))), ((int)(((byte)(192)))));
            this.button19.Location = new System.Drawing.Point(384, 84);
            this.button19.Name = "button19";
            this.button19.Size = new System.Drawing.Size(62, 25);
            this.button19.TabIndex = 24;
            this.button19.Text = "执行";
            this.button19.UseVisualStyleBackColor = true;
            this.button19.Click += new System.EventHandler(this.button19_Click_1);
            // 
            // canAConnect
            // 
            this.canAConnect.AutoSize = true;
            this.canAConnect.Font = new System.Drawing.Font("宋体", 12F, System.Drawing.FontStyle.Regular, System.Drawing.GraphicsUnit.Point, ((byte)(134)));
            this.canAConnect.ForeColor = System.Drawing.Color.Red;
            this.canAConnect.Location = new System.Drawing.Point(315, 56);
            this.canAConnect.Name = "canAConnect";
            this.canAConnect.Size = new System.Drawing.Size(40, 16);
            this.canAConnect.TabIndex = 21;
            this.canAConnect.Text = "断开";
            // 
            // txtAIP
            // 
            this.txtAIP.BorderStyle = System.Windows.Forms.BorderStyle.None;
            this.txtAIP.Font = new System.Drawing.Font("Times New Roman", 12F, System.Drawing.FontStyle.Regular, System.Drawing.GraphicsUnit.Point, ((byte)(0)));
            this.txtAIP.ForeColor = System.Drawing.Color.Black;
            this.txtAIP.Location = new System.Drawing.Point(106, 52);
            this.txtAIP.Name = "txtAIP";
            this.txtAIP.Size = new System.Drawing.Size(93, 19);
            this.txtAIP.TabIndex = 22;
            this.txtAIP.Text = "200.1.1.191";
            this.txtAIP.TextAlign = System.Windows.Forms.HorizontalAlignment.Center;
            // 
            // txtAPort
            // 
            this.txtAPort.BorderStyle = System.Windows.Forms.BorderStyle.None;
            this.txtAPort.Font = new System.Drawing.Font("Times New Roman", 12F, System.Drawing.FontStyle.Regular, System.Drawing.GraphicsUnit.Point, ((byte)(0)));
            this.txtAPort.ForeColor = System.Drawing.Color.Black;
            this.txtAPort.Location = new System.Drawing.Point(230, 53);
            this.txtAPort.Name = "txtAPort";
            this.txtAPort.Size = new System.Drawing.Size(62, 19);
            this.txtAPort.TabIndex = 23;
            this.txtAPort.Text = "8001";
            this.txtAPort.TextAlign = System.Windows.Forms.HorizontalAlignment.Center;
            // 
            // label115
            // 
            this.label115.AutoSize = true;
            this.label115.Font = new System.Drawing.Font("宋体", 12F, System.Drawing.FontStyle.Bold, System.Drawing.GraphicsUnit.Point, ((byte)(134)));
            this.label115.ForeColor = System.Drawing.Color.Black;
            this.label115.Location = new System.Drawing.Point(6, 91);
            this.label115.Name = "label115";
            this.label115.Size = new System.Drawing.Size(85, 16);
            this.label115.TabIndex = 20;
            this.label115.Text = "次接驳盒:";
            // 
            // button2
            // 
            this.button2.FlatStyle = System.Windows.Forms.FlatStyle.Flat;
            this.button2.Font = new System.Drawing.Font("楷体", 12F, System.Drawing.FontStyle.Regular, System.Drawing.GraphicsUnit.Point, ((byte)(134)));
            this.button2.ForeColor = System.Drawing.Color.FromArgb(((int)(((byte)(0)))), ((int)(((byte)(192)))), ((int)(((byte)(192)))));
            this.button2.Location = new System.Drawing.Point(384, 50);
            this.button2.Name = "button2";
            this.button2.Size = new System.Drawing.Size(62, 25);
            this.button2.TabIndex = 19;
            this.button2.Text = "配置";
            this.button2.UseVisualStyleBackColor = true;
            this.button2.Click += new System.EventHandler(this.button2_Click);
            // 
            // label38
            // 
            this.label38.AutoSize = true;
            this.label38.Font = new System.Drawing.Font("宋体", 12F, System.Drawing.FontStyle.Bold, System.Drawing.GraphicsUnit.Point, ((byte)(134)));
            this.label38.ForeColor = System.Drawing.Color.Black;
            this.label38.Location = new System.Drawing.Point(6, 53);
            this.label38.Name = "label38";
            this.label38.Size = new System.Drawing.Size(85, 16);
            this.label38.TabIndex = 16;
            this.label38.Text = "主接驳盒:";
            // 
            // canBConnect
            // 
            this.canBConnect.AutoSize = true;
            this.canBConnect.Font = new System.Drawing.Font("宋体", 12F, System.Drawing.FontStyle.Regular, System.Drawing.GraphicsUnit.Point, ((byte)(134)));
            this.canBConnect.ForeColor = System.Drawing.Color.Red;
            this.canBConnect.Location = new System.Drawing.Point(315, 90);
            this.canBConnect.Name = "canBConnect";
            this.canBConnect.Size = new System.Drawing.Size(40, 16);
            this.canBConnect.TabIndex = 14;
            this.canBConnect.Text = "断开";
            // 
            // label18
            // 
            this.label18.AutoSize = true;
            this.label18.Font = new System.Drawing.Font("Times New Roman", 12F, System.Drawing.FontStyle.Bold, System.Drawing.GraphicsUnit.Point, ((byte)(0)));
            this.label18.ForeColor = System.Drawing.Color.Black;
            this.label18.Location = new System.Drawing.Point(120, 22);
            this.label18.Name = "label18";
            this.label18.Size = new System.Drawing.Size(58, 19);
            this.label18.TabIndex = 13;
            this.label18.Text = "IP地址";
            // 
            // label22
            // 
            this.label22.AutoSize = true;
            this.label22.Font = new System.Drawing.Font("宋体", 12F, System.Drawing.FontStyle.Bold, System.Drawing.GraphicsUnit.Point, ((byte)(134)));
            this.label22.ForeColor = System.Drawing.Color.Black;
            this.label22.Location = new System.Drawing.Point(313, 23);
            this.label22.Name = "label22";
            this.label22.Size = new System.Drawing.Size(42, 16);
            this.label22.TabIndex = 14;
            this.label22.Text = "状态";
            // 
            // txtBIP
            // 
            this.txtBIP.BorderStyle = System.Windows.Forms.BorderStyle.None;
            this.txtBIP.Font = new System.Drawing.Font("Times New Roman", 12F, System.Drawing.FontStyle.Regular, System.Drawing.GraphicsUnit.Point, ((byte)(0)));
            this.txtBIP.ForeColor = System.Drawing.Color.Black;
            this.txtBIP.Location = new System.Drawing.Point(106, 90);
            this.txtBIP.Name = "txtBIP";
            this.txtBIP.Size = new System.Drawing.Size(93, 19);
            this.txtBIP.TabIndex = 17;
            this.txtBIP.Text = "200.1.1.191";
            this.txtBIP.TextAlign = System.Windows.Forms.HorizontalAlignment.Center;
            // 
            // txtBPort
            // 
            this.txtBPort.BorderStyle = System.Windows.Forms.BorderStyle.None;
            this.txtBPort.Font = new System.Drawing.Font("Times New Roman", 12F, System.Drawing.FontStyle.Regular, System.Drawing.GraphicsUnit.Point, ((byte)(0)));
            this.txtBPort.ForeColor = System.Drawing.Color.Black;
            this.txtBPort.Location = new System.Drawing.Point(230, 90);
            this.txtBPort.Name = "txtBPort";
            this.txtBPort.Size = new System.Drawing.Size(62, 19);
            this.txtBPort.TabIndex = 18;
            this.txtBPort.Text = "8001";
            this.txtBPort.TextAlign = System.Windows.Forms.HorizontalAlignment.Center;
            // 
            // label19
            // 
            this.label19.AutoSize = true;
            this.label19.Font = new System.Drawing.Font("宋体", 12F, System.Drawing.FontStyle.Bold, System.Drawing.GraphicsUnit.Point, ((byte)(134)));
            this.label19.ForeColor = System.Drawing.Color.Black;
            this.label19.Location = new System.Drawing.Point(230, 23);
            this.label19.Name = "label19";
            this.label19.Size = new System.Drawing.Size(59, 16);
            this.label19.TabIndex = 13;
            this.label19.Text = "端口号";
            // 
            // groupBox24
            // 
            this.groupBox24.Controls.Add(this.tableLayoutPanel9);
            this.groupBox24.Controls.Add(this.checkBox3);
            this.groupBox24.Controls.Add(this.checkBox4);
            this.groupBox24.Dock = System.Windows.Forms.DockStyle.Fill;
            this.groupBox24.Font = new System.Drawing.Font("Times New Roman", 14.25F, System.Drawing.FontStyle.Bold);
            this.groupBox24.ForeColor = System.Drawing.Color.Maroon;
            this.groupBox24.Location = new System.Drawing.Point(3, 132);
            this.groupBox24.Name = "groupBox24";
            this.groupBox24.Size = new System.Drawing.Size(481, 258);
            this.groupBox24.TabIndex = 7;
            this.groupBox24.TabStop = false;
            this.groupBox24.Text = "GPS位置信息";
            // 
            // tableLayoutPanel9
            // 
            this.tableLayoutPanel9.ColumnCount = 1;
            this.tableLayoutPanel9.ColumnStyles.Add(new System.Windows.Forms.ColumnStyle(System.Windows.Forms.SizeType.Percent, 50F));
            this.tableLayoutPanel9.Controls.Add(this.webGPS, 0, 0);
            this.tableLayoutPanel9.Controls.Add(this.panel11, 0, 1);
            this.tableLayoutPanel9.Dock = System.Windows.Forms.DockStyle.Fill;
            this.tableLayoutPanel9.Location = new System.Drawing.Point(3, 25);
            this.tableLayoutPanel9.Name = "tableLayoutPanel9";
            this.tableLayoutPanel9.RowCount = 2;
            this.tableLayoutPanel9.RowStyles.Add(new System.Windows.Forms.RowStyle(System.Windows.Forms.SizeType.Percent, 78.69566F));
            this.tableLayoutPanel9.RowStyles.Add(new System.Windows.Forms.RowStyle(System.Windows.Forms.SizeType.Percent, 21.30435F));
            this.tableLayoutPanel9.Size = new System.Drawing.Size(475, 230);
            this.tableLayoutPanel9.TabIndex = 12;
            // 
            // webGPS
            // 
            this.webGPS.Dock = System.Windows.Forms.DockStyle.Fill;
            this.webGPS.Location = new System.Drawing.Point(3, 3);
            this.webGPS.MinimumSize = new System.Drawing.Size(20, 20);
            this.webGPS.Name = "webGPS";
            this.webGPS.Size = new System.Drawing.Size(469, 174);
            this.webGPS.TabIndex = 12;
            // 
            // panel11
            // 
            this.panel11.Controls.Add(this.btnSwitch);
            this.panel11.Controls.Add(this.cbSerial);
            this.panel11.Controls.Add(this.txtLatitude);
            this.panel11.Controls.Add(this.label10);
            this.panel11.Controls.Add(this.txtLongitude);
            this.panel11.Controls.Add(this.label8);
            this.panel11.Controls.Add(this.label116);
            this.panel11.Dock = System.Windows.Forms.DockStyle.Fill;
            this.panel11.Location = new System.Drawing.Point(3, 183);
            this.panel11.Name = "panel11";
            this.panel11.Size = new System.Drawing.Size(469, 44);
            this.panel11.TabIndex = 0;
            // 
            // btnSwitch
            // 
            this.btnSwitch.FlatStyle = System.Windows.Forms.FlatStyle.Popup;
            this.btnSwitch.Font = new System.Drawing.Font("楷体", 12F, System.Drawing.FontStyle.Regular, System.Drawing.GraphicsUnit.Point, ((byte)(134)));
            this.btnSwitch.ForeColor = System.Drawing.Color.FromArgb(((int)(((byte)(0)))), ((int)(((byte)(192)))), ((int)(((byte)(192)))));
            this.btnSwitch.Location = new System.Drawing.Point(130, 11);
            this.btnSwitch.Name = "btnSwitch";
            this.btnSwitch.Size = new System.Drawing.Size(50, 24);
            this.btnSwitch.TabIndex = 45;
            this.btnSwitch.Text = "打开";
            this.btnSwitch.UseVisualStyleBackColor = true;
            this.btnSwitch.Click += new System.EventHandler(this.button3_Click_1);
            // 
            // cbSerial
            // 
            this.cbSerial.BackColor = System.Drawing.SystemColors.Control;
            this.cbSerial.DropDownStyle = System.Windows.Forms.ComboBoxStyle.DropDownList;
            this.cbSerial.Font = new System.Drawing.Font("Times New Roman", 10.5F, System.Drawing.FontStyle.Bold, System.Drawing.GraphicsUnit.Point, ((byte)(0)));
            this.cbSerial.FormattingEnabled = true;
            this.cbSerial.Location = new System.Drawing.Point(53, 10);
            this.cbSerial.Name = "cbSerial";
            this.cbSerial.Size = new System.Drawing.Size(70, 25);
            this.cbSerial.TabIndex = 27;
            // 
            // txtLatitude
            // 
            this.txtLatitude.BackColor = System.Drawing.Color.White;
            this.txtLatitude.BorderStyle = System.Windows.Forms.BorderStyle.None;
            this.txtLatitude.Font = new System.Drawing.Font("宋体", 12F, System.Drawing.FontStyle.Regular, System.Drawing.GraphicsUnit.Point, ((byte)(134)));
            this.txtLatitude.ForeColor = System.Drawing.Color.FromArgb(((int)(((byte)(0)))), ((int)(((byte)(0)))), ((int)(((byte)(192)))));
            this.txtLatitude.Location = new System.Drawing.Point(376, 15);
            this.txtLatitude.Name = "txtLatitude";
            this.txtLatitude.ReadOnly = true;
            this.txtLatitude.Size = new System.Drawing.Size(100, 19);
            this.txtLatitude.TabIndex = 25;
            this.txtLatitude.TextAlign = System.Windows.Forms.HorizontalAlignment.Center;
            // 
            // label10
            // 
            this.label10.AutoSize = true;
            this.label10.Font = new System.Drawing.Font("Times New Roman", 12F, System.Drawing.FontStyle.Bold, System.Drawing.GraphicsUnit.Point, ((byte)(0)));
            this.label10.ForeColor = System.Drawing.Color.Black;
            this.label10.Location = new System.Drawing.Point(332, 14);
            this.label10.Name = "label10";
            this.label10.Size = new System.Drawing.Size(48, 19);
            this.label10.TabIndex = 24;
            this.label10.Text = "纬度:";
            // 
            // txtLongitude
            // 
            this.txtLongitude.BackColor = System.Drawing.Color.White;
            this.txtLongitude.BorderStyle = System.Windows.Forms.BorderStyle.None;
            this.txtLongitude.Font = new System.Drawing.Font("宋体", 12F, System.Drawing.FontStyle.Regular, System.Drawing.GraphicsUnit.Point, ((byte)(134)));
            this.txtLongitude.ForeColor = System.Drawing.Color.FromArgb(((int)(((byte)(0)))), ((int)(((byte)(0)))), ((int)(((byte)(192)))));
            this.txtLongitude.Location = new System.Drawing.Point(233, 15);
            this.txtLongitude.Name = "txtLongitude";
            this.txtLongitude.ReadOnly = true;
            this.txtLongitude.Size = new System.Drawing.Size(100, 19);
            this.txtLongitude.TabIndex = 23;
            this.txtLongitude.TextAlign = System.Windows.Forms.HorizontalAlignment.Center;
            // 
            // label8
            // 
            this.label8.AutoSize = true;
            this.label8.Font = new System.Drawing.Font("Times New Roman", 12F, System.Drawing.FontStyle.Bold, System.Drawing.GraphicsUnit.Point, ((byte)(0)));
            this.label8.ForeColor = System.Drawing.Color.Black;
            this.label8.Location = new System.Drawing.Point(189, 14);
            this.label8.Name = "label8";
            this.label8.Size = new System.Drawing.Size(48, 19);
            this.label8.TabIndex = 22;
            this.label8.Text = "经度:";
            // 
            // label116
            // 
            this.label116.AutoSize = true;
            this.label116.Font = new System.Drawing.Font("Times New Roman", 12F, System.Drawing.FontStyle.Bold, System.Drawing.GraphicsUnit.Point, ((byte)(0)));
            this.label116.ForeColor = System.Drawing.Color.Black;
            this.label116.Location = new System.Drawing.Point(1, 14);
            this.label116.Name = "label116";
            this.label116.Size = new System.Drawing.Size(48, 19);
            this.label116.TabIndex = 26;
            this.label116.Text = "串口:";
            // 
            // checkBox3
            // 
            this.checkBox3.AutoSize = true;
            this.checkBox3.ForeColor = System.Drawing.Color.Black;
            this.checkBox3.Location = new System.Drawing.Point(568, 269);
            this.checkBox3.Name = "checkBox3";
            this.checkBox3.Size = new System.Drawing.Size(71, 26);
            this.checkBox3.TabIndex = 11;
            this.checkBox3.Text = "打开";
            this.checkBox3.UseVisualStyleBackColor = true;
            // 
            // checkBox4
            // 
            this.checkBox4.AutoSize = true;
            this.checkBox4.ForeColor = System.Drawing.Color.Black;
            this.checkBox4.Location = new System.Drawing.Point(568, 224);
            this.checkBox4.Name = "checkBox4";
            this.checkBox4.Size = new System.Drawing.Size(71, 26);
            this.checkBox4.TabIndex = 11;
            this.checkBox4.Text = "打开";
            this.checkBox4.UseVisualStyleBackColor = true;
            // 
            // pnlControl
            // 
            this.pnlControl.Controls.Add(this.tableLayoutPanel7);
            this.pnlControl.Controls.Add(this.groupBox11);
            this.pnlControl.Dock = System.Windows.Forms.DockStyle.Fill;
            this.pnlControl.Location = new System.Drawing.Point(504, 3);
            this.pnlControl.Name = "pnlControl";
            this.tableLayoutPanel4.SetRowSpan(this.pnlControl, 3);
            this.pnlControl.Size = new System.Drawing.Size(648, 527);
            this.pnlControl.TabIndex = 12;
            // 
            // tableLayoutPanel7
            // 
            this.tableLayoutPanel7.ColumnCount = 2;
            this.tableLayoutPanel7.ColumnStyles.Add(new System.Windows.Forms.ColumnStyle(System.Windows.Forms.SizeType.Absolute, 345F));
            this.tableLayoutPanel7.ColumnStyles.Add(new System.Windows.Forms.ColumnStyle(System.Windows.Forms.SizeType.Absolute, 276F));
            this.tableLayoutPanel7.Controls.Add(this.groupBox7, 0, 1);
            this.tableLayoutPanel7.Controls.Add(this.panel10, 0, 0);
            this.tableLayoutPanel7.Controls.Add(this.groupBox14, 1, 1);
            this.tableLayoutPanel7.Dock = System.Windows.Forms.DockStyle.Fill;
            this.tableLayoutPanel7.Location = new System.Drawing.Point(0, 113);
            this.tableLayoutPanel7.Name = "tableLayoutPanel7";
            this.tableLayoutPanel7.RowCount = 2;
            this.tableLayoutPanel7.RowStyles.Add(new System.Windows.Forms.RowStyle(System.Windows.Forms.SizeType.Percent, 42.99517F));
            this.tableLayoutPanel7.RowStyles.Add(new System.Windows.Forms.RowStyle(System.Windows.Forms.SizeType.Percent, 57.00483F));
            this.tableLayoutPanel7.Size = new System.Drawing.Size(648, 414);
            this.tableLayoutPanel7.TabIndex = 8;
            // 
            // groupBox7
            // 
            this.groupBox7.Controls.Add(this.button28);
            this.groupBox7.Controls.Add(this.btnHighPowOn);
            this.groupBox7.Controls.Add(this.label112);
            this.groupBox7.Controls.Add(this.btnHighPowOff);
            this.groupBox7.Controls.Add(this.txtATemp);
            this.groupBox7.Controls.Add(this.label111);
            this.groupBox7.Controls.Add(this.label25);
            this.groupBox7.Controls.Add(this.label24);
            this.groupBox7.Controls.Add(this.txtCommandNum);
            this.groupBox7.Controls.Add(this.txtTotalNum);
            this.groupBox7.Controls.Add(this.txtBTemp);
            this.groupBox7.Controls.Add(this.label76);
            this.groupBox7.Controls.Add(this.label36);
            this.groupBox7.Controls.Add(this.label16);
            this.groupBox7.Controls.Add(this.canErrortime);
            this.groupBox7.Controls.Add(this.canStartTime);
            this.groupBox7.Dock = System.Windows.Forms.DockStyle.Fill;
            this.groupBox7.Font = new System.Drawing.Font("宋体", 14.25F, System.Drawing.FontStyle.Bold, System.Drawing.GraphicsUnit.Point, ((byte)(134)));
            this.groupBox7.ForeColor = System.Drawing.Color.Maroon;
            this.groupBox7.Location = new System.Drawing.Point(3, 181);
            this.groupBox7.Name = "groupBox7";
            this.groupBox7.Size = new System.Drawing.Size(339, 230);
            this.groupBox7.TabIndex = 6;
            this.groupBox7.TabStop = false;
            this.groupBox7.Text = "舱内状态信息";
            // 
            // button28
            // 
            this.button28.FlatStyle = System.Windows.Forms.FlatStyle.Popup;
            this.button28.Font = new System.Drawing.Font("楷体", 12F);
            this.button28.ForeColor = System.Drawing.Color.FromArgb(((int)(((byte)(0)))), ((int)(((byte)(192)))), ((int)(((byte)(192)))));
            this.button28.Location = new System.Drawing.Point(261, 197);
            this.button28.Name = "button28";
            this.button28.Size = new System.Drawing.Size(70, 24);
            this.button28.TabIndex = 47;
            this.button28.Text = "读数";
            this.button28.UseVisualStyleBackColor = true;
            this.button28.Click += new System.EventHandler(this.button28_Click);
            // 
            // btnHighPowOn
            // 
            this.btnHighPowOn.FlatStyle = System.Windows.Forms.FlatStyle.Popup;
            this.btnHighPowOn.Font = new System.Drawing.Font("楷体", 12F);
            this.btnHighPowOn.ForeColor = System.Drawing.Color.FromArgb(((int)(((byte)(0)))), ((int)(((byte)(192)))), ((int)(((byte)(192)))));
            this.btnHighPowOn.Location = new System.Drawing.Point(111, 197);
            this.btnHighPowOn.Name = "btnHighPowOn";
            this.btnHighPowOn.Size = new System.Drawing.Size(70, 24);
            this.btnHighPowOn.TabIndex = 44;
            this.btnHighPowOn.Text = "开机";
            this.btnHighPowOn.UseVisualStyleBackColor = true;
            this.btnHighPowOn.Click += new System.EventHandler(this.button26_Click);
            // 
            // label112
            // 
            this.label112.AutoSize = true;
            this.label112.Font = new System.Drawing.Font("Times New Roman", 12F, System.Drawing.FontStyle.Bold);
            this.label112.ForeColor = System.Drawing.Color.Black;
            this.label112.Location = new System.Drawing.Point(3, 199);
            this.label112.Name = "label112";
            this.label112.Size = new System.Drawing.Size(111, 19);
            this.label112.TabIndex = 46;
            this.label112.Text = "主接驳电源：";
            // 
            // btnHighPowOff
            // 
            this.btnHighPowOff.Enabled = false;
            this.btnHighPowOff.FlatStyle = System.Windows.Forms.FlatStyle.Popup;
            this.btnHighPowOff.Font = new System.Drawing.Font("楷体", 12F);
            this.btnHighPowOff.ForeColor = System.Drawing.Color.Red;
            this.btnHighPowOff.Location = new System.Drawing.Point(187, 197);
            this.btnHighPowOff.Name = "btnHighPowOff";
            this.btnHighPowOff.Size = new System.Drawing.Size(70, 24);
            this.btnHighPowOff.TabIndex = 45;
            this.btnHighPowOff.Text = "关机";
            this.btnHighPowOff.UseVisualStyleBackColor = true;
            this.btnHighPowOff.Click += new System.EventHandler(this.btnHighPowOff_Click);
            // 
            // txtATemp
            // 
            this.txtATemp.BackColor = System.Drawing.Color.White;
            this.txtATemp.BorderStyle = System.Windows.Forms.BorderStyle.None;
            this.txtATemp.Font = new System.Drawing.Font("宋体", 14F);
            this.txtATemp.ForeColor = System.Drawing.Color.FromArgb(((int)(((byte)(0)))), ((int)(((byte)(0)))), ((int)(((byte)(192)))));
            this.txtATemp.Location = new System.Drawing.Point(236, 169);
            this.txtATemp.Name = "txtATemp";
            this.txtATemp.ReadOnly = true;
            this.txtATemp.Size = new System.Drawing.Size(85, 22);
            this.txtATemp.TabIndex = 42;
            this.txtATemp.TextAlign = System.Windows.Forms.HorizontalAlignment.Center;
            // 
            // label111
            // 
            this.label111.AutoSize = true;
            this.label111.Font = new System.Drawing.Font("Times New Roman", 12F, System.Drawing.FontStyle.Bold);
            this.label111.ForeColor = System.Drawing.Color.Black;
            this.label111.Location = new System.Drawing.Point(3, 172);
            this.label111.Name = "label111";
            this.label111.Size = new System.Drawing.Size(196, 19);
            this.label111.TabIndex = 43;
            this.label111.Text = "主接驳盒舱内温度（℃）";
            // 
            // label25
            // 
            this.label25.AutoSize = true;
            this.label25.Font = new System.Drawing.Font("宋体", 12F, System.Drawing.FontStyle.Bold);
            this.label25.ForeColor = System.Drawing.Color.Black;
            this.label25.Location = new System.Drawing.Point(3, 111);
            this.label25.Name = "label25";
            this.label25.Size = new System.Drawing.Size(93, 16);
            this.label25.TabIndex = 40;
            this.label25.Text = "发送数据包";
            // 
            // label24
            // 
            this.label24.AutoSize = true;
            this.label24.Font = new System.Drawing.Font("宋体", 12F, System.Drawing.FontStyle.Bold);
            this.label24.ForeColor = System.Drawing.Color.Black;
            this.label24.Location = new System.Drawing.Point(3, 82);
            this.label24.Name = "label24";
            this.label24.Size = new System.Drawing.Size(93, 16);
            this.label24.TabIndex = 41;
            this.label24.Text = "接收数据包";
            // 
            // txtCommandNum
            // 
            this.txtCommandNum.BorderStyle = System.Windows.Forms.BorderStyle.None;
            this.txtCommandNum.Font = new System.Drawing.Font("Times New Roman", 14F);
            this.txtCommandNum.ForeColor = System.Drawing.Color.Black;
            this.txtCommandNum.Location = new System.Drawing.Point(146, 111);
            this.txtCommandNum.Name = "txtCommandNum";
            this.txtCommandNum.Size = new System.Drawing.Size(175, 22);
            this.txtCommandNum.TabIndex = 38;
            this.txtCommandNum.TextAlign = System.Windows.Forms.HorizontalAlignment.Center;
            // 
            // txtTotalNum
            // 
            this.txtTotalNum.BorderStyle = System.Windows.Forms.BorderStyle.None;
            this.txtTotalNum.Font = new System.Drawing.Font("Times New Roman", 14F);
            this.txtTotalNum.ForeColor = System.Drawing.Color.Black;
            this.txtTotalNum.Location = new System.Drawing.Point(146, 82);
            this.txtTotalNum.Name = "txtTotalNum";
            this.txtTotalNum.Size = new System.Drawing.Size(175, 22);
            this.txtTotalNum.TabIndex = 39;
            this.txtTotalNum.TextAlign = System.Windows.Forms.HorizontalAlignment.Center;
            // 
            // txtBTemp
            // 
            this.txtBTemp.BackColor = System.Drawing.Color.White;
            this.txtBTemp.BorderStyle = System.Windows.Forms.BorderStyle.None;
            this.txtBTemp.Font = new System.Drawing.Font("宋体", 14F);
            this.txtBTemp.ForeColor = System.Drawing.Color.FromArgb(((int)(((byte)(0)))), ((int)(((byte)(0)))), ((int)(((byte)(192)))));
            this.txtBTemp.Location = new System.Drawing.Point(236, 140);
            this.txtBTemp.Name = "txtBTemp";
            this.txtBTemp.ReadOnly = true;
            this.txtBTemp.Size = new System.Drawing.Size(85, 22);
            this.txtBTemp.TabIndex = 8;
            this.txtBTemp.TextAlign = System.Windows.Forms.HorizontalAlignment.Center;
            // 
            // label76
            // 
            this.label76.AutoSize = true;
            this.label76.Font = new System.Drawing.Font("Times New Roman", 12F, System.Drawing.FontStyle.Bold);
            this.label76.ForeColor = System.Drawing.Color.Black;
            this.label76.Location = new System.Drawing.Point(3, 140);
            this.label76.Name = "label76";
            this.label76.Size = new System.Drawing.Size(196, 19);
            this.label76.TabIndex = 35;
            this.label76.Text = "次接驳盒舱内温度（℃）";
            // 
            // label36
            // 
            this.label36.AutoSize = true;
            this.label36.Font = new System.Drawing.Font("宋体", 12F, System.Drawing.FontStyle.Bold);
            this.label36.ForeColor = System.Drawing.Color.Black;
            this.label36.Location = new System.Drawing.Point(3, 53);
            this.label36.Name = "label36";
            this.label36.Size = new System.Drawing.Size(110, 16);
            this.label36.TabIndex = 14;
            this.label36.Text = "故障发生时间";
            // 
            // label16
            // 
            this.label16.AutoSize = true;
            this.label16.Font = new System.Drawing.Font("宋体", 12F, System.Drawing.FontStyle.Bold);
            this.label16.ForeColor = System.Drawing.Color.Black;
            this.label16.Location = new System.Drawing.Point(3, 24);
            this.label16.Name = "label16";
            this.label16.Size = new System.Drawing.Size(110, 16);
            this.label16.TabIndex = 14;
            this.label16.Text = "开始采样时间";
            // 
            // canErrortime
            // 
            this.canErrortime.BorderStyle = System.Windows.Forms.BorderStyle.None;
            this.canErrortime.Font = new System.Drawing.Font("Times New Roman", 14F);
            this.canErrortime.ForeColor = System.Drawing.Color.Black;
            this.canErrortime.Location = new System.Drawing.Point(146, 53);
            this.canErrortime.Name = "canErrortime";
            this.canErrortime.Size = new System.Drawing.Size(175, 22);
            this.canErrortime.TabIndex = 13;
            this.canErrortime.TextAlign = System.Windows.Forms.HorizontalAlignment.Center;
            // 
            // canStartTime
            // 
            this.canStartTime.BorderStyle = System.Windows.Forms.BorderStyle.None;
            this.canStartTime.Font = new System.Drawing.Font("Times New Roman", 14F);
            this.canStartTime.ForeColor = System.Drawing.Color.Black;
            this.canStartTime.Location = new System.Drawing.Point(146, 24);
            this.canStartTime.Name = "canStartTime";
            this.canStartTime.Size = new System.Drawing.Size(175, 22);
            this.canStartTime.TabIndex = 13;
            this.canStartTime.TextAlign = System.Windows.Forms.HorizontalAlignment.Center;
            // 
            // panel10
            // 
            this.tableLayoutPanel7.SetColumnSpan(this.panel10, 2);
            this.panel10.Controls.Add(this.groupBox2);
            this.panel10.Dock = System.Windows.Forms.DockStyle.Fill;
            this.panel10.Location = new System.Drawing.Point(3, 3);
            this.panel10.Name = "panel10";
            this.panel10.Size = new System.Drawing.Size(642, 172);
            this.panel10.TabIndex = 0;
            // 
            // groupBox2
            // 
            this.groupBox2.Controls.Add(this.txtCh3Vol);
            this.groupBox2.Controls.Add(this.txtBCh5Logo);
            this.groupBox2.Controls.Add(this.txtCh5Vol);
            this.groupBox2.Controls.Add(this.label99);
            this.groupBox2.Controls.Add(this.txtCh5Cur);
            this.groupBox2.Controls.Add(this.label101);
            this.groupBox2.Controls.Add(this.txtCh5Power);
            this.groupBox2.Controls.Add(this.txtBCh5Status);
            this.groupBox2.Controls.Add(this.label102);
            this.groupBox2.Controls.Add(this.txtCh5Time);
            this.groupBox2.Controls.Add(this.txtBCh4Logo);
            this.groupBox2.Controls.Add(this.txtCh4Vol);
            this.groupBox2.Controls.Add(this.label42);
            this.groupBox2.Controls.Add(this.txtCh4Cur);
            this.groupBox2.Controls.Add(this.label47);
            this.groupBox2.Controls.Add(this.txtCh4Power);
            this.groupBox2.Controls.Add(this.txtBCh4Status);
            this.groupBox2.Controls.Add(this.label48);
            this.groupBox2.Controls.Add(this.txtCh4Time);
            this.groupBox2.Controls.Add(this.txtBCh3Logo);
            this.groupBox2.Controls.Add(this.label1);
            this.groupBox2.Controls.Add(this.txtCh3Cur);
            this.groupBox2.Controls.Add(this.label27);
            this.groupBox2.Controls.Add(this.txtCh3Power);
            this.groupBox2.Controls.Add(this.txtBCh3Status);
            this.groupBox2.Controls.Add(this.label28);
            this.groupBox2.Controls.Add(this.txtCh3Time);
            this.groupBox2.Controls.Add(this.txtBCh2Logo);
            this.groupBox2.Controls.Add(this.txtBCh1Logo);
            this.groupBox2.Controls.Add(this.txtCh2Vol);
            this.groupBox2.Controls.Add(this.txtCh1Vol);
            this.groupBox2.Controls.Add(this.label50);
            this.groupBox2.Controls.Add(this.label49);
            this.groupBox2.Controls.Add(this.txtCh2Cur);
            this.groupBox2.Controls.Add(this.txtCh1Cur);
            this.groupBox2.Controls.Add(this.label45);
            this.groupBox2.Controls.Add(this.txtCh2Power);
            this.groupBox2.Controls.Add(this.label44);
            this.groupBox2.Controls.Add(this.txtCh1Power);
            this.groupBox2.Controls.Add(this.txtBCh1Status);
            this.groupBox2.Controls.Add(this.txtBCh2Status);
            this.groupBox2.Controls.Add(this.txtCh1Time);
            this.groupBox2.Controls.Add(this.label32);
            this.groupBox2.Controls.Add(this.txtCh2Time);
            this.groupBox2.Controls.Add(this.label30);
            this.groupBox2.Controls.Add(this.label100);
            this.groupBox2.Controls.Add(this.label43);
            this.groupBox2.Controls.Add(this.label4);
            this.groupBox2.Controls.Add(this.label5);
            this.groupBox2.Controls.Add(this.label6);
            this.groupBox2.Dock = System.Windows.Forms.DockStyle.Fill;
            this.groupBox2.Font = new System.Drawing.Font("宋体", 14.25F, System.Drawing.FontStyle.Bold);
            this.groupBox2.ForeColor = System.Drawing.Color.Maroon;
            this.groupBox2.Location = new System.Drawing.Point(0, 0);
            this.groupBox2.Name = "groupBox2";
            this.groupBox2.Size = new System.Drawing.Size(642, 172);
            this.groupBox2.TabIndex = 0;
            this.groupBox2.TabStop = false;
            this.groupBox2.Text = "次接驳盒电能输出通道信息";
            // 
            // txtCh3Vol
            // 
            this.txtCh3Vol.BackColor = System.Drawing.Color.White;
            this.txtCh3Vol.BorderStyle = System.Windows.Forms.BorderStyle.None;
            this.txtCh3Vol.Font = new System.Drawing.Font("宋体", 14F);
            this.txtCh3Vol.ForeColor = System.Drawing.Color.Red;
            this.txtCh3Vol.Location = new System.Drawing.Point(67, 84);
            this.txtCh3Vol.Name = "txtCh3Vol";
            this.txtCh3Vol.ReadOnly = true;
            this.txtCh3Vol.Size = new System.Drawing.Size(60, 22);
            this.txtCh3Vol.TabIndex = 85;
            this.txtCh3Vol.TextAlign = System.Windows.Forms.HorizontalAlignment.Center;
            // 
            // txtBCh5Logo
            // 
            this.txtBCh5Logo.BackColor = System.Drawing.Color.DarkSeaGreen;
            this.txtBCh5Logo.BorderStyle = System.Windows.Forms.BorderStyle.None;
            this.txtBCh5Logo.Font = new System.Drawing.Font("宋体", 14F);
            this.txtBCh5Logo.ForeColor = System.Drawing.Color.White;
            this.txtBCh5Logo.Location = new System.Drawing.Point(594, 140);
            this.txtBCh5Logo.Name = "txtBCh5Logo";
            this.txtBCh5Logo.ReadOnly = true;
            this.txtBCh5Logo.Size = new System.Drawing.Size(42, 22);
            this.txtBCh5Logo.TabIndex = 109;
            this.txtBCh5Logo.Text = "正常";
            this.txtBCh5Logo.TextAlign = System.Windows.Forms.HorizontalAlignment.Center;
            // 
            // txtCh5Vol
            // 
            this.txtCh5Vol.BackColor = System.Drawing.Color.White;
            this.txtCh5Vol.BorderStyle = System.Windows.Forms.BorderStyle.None;
            this.txtCh5Vol.Font = new System.Drawing.Font("宋体", 14F);
            this.txtCh5Vol.ForeColor = System.Drawing.Color.Red;
            this.txtCh5Vol.Location = new System.Drawing.Point(67, 140);
            this.txtCh5Vol.Name = "txtCh5Vol";
            this.txtCh5Vol.ReadOnly = true;
            this.txtCh5Vol.Size = new System.Drawing.Size(60, 22);
            this.txtCh5Vol.TabIndex = 103;
            this.txtCh5Vol.TextAlign = System.Windows.Forms.HorizontalAlignment.Center;
            // 
            // label99
            // 
            this.label99.AutoSize = true;
            this.label99.Font = new System.Drawing.Font("Times New Roman", 12F, ((System.Drawing.FontStyle)((System.Drawing.FontStyle.Bold | System.Drawing.FontStyle.Italic))));
            this.label99.ForeColor = System.Drawing.Color.Black;
            this.label99.Location = new System.Drawing.Point(308, 140);
            this.label99.Name = "label99";
            this.label99.Size = new System.Drawing.Size(23, 19);
            this.label99.TabIndex = 108;
            this.label99.Text = "W";
            // 
            // txtCh5Cur
            // 
            this.txtCh5Cur.BackColor = System.Drawing.Color.White;
            this.txtCh5Cur.BorderStyle = System.Windows.Forms.BorderStyle.None;
            this.txtCh5Cur.Font = new System.Drawing.Font("宋体", 14F);
            this.txtCh5Cur.ForeColor = System.Drawing.Color.Blue;
            this.txtCh5Cur.Location = new System.Drawing.Point(152, 140);
            this.txtCh5Cur.Name = "txtCh5Cur";
            this.txtCh5Cur.ReadOnly = true;
            this.txtCh5Cur.Size = new System.Drawing.Size(60, 22);
            this.txtCh5Cur.TabIndex = 102;
            this.txtCh5Cur.TextAlign = System.Windows.Forms.HorizontalAlignment.Center;
            // 
            // label101
            // 
            this.label101.AutoSize = true;
            this.label101.Font = new System.Drawing.Font("Times New Roman", 12F, ((System.Drawing.FontStyle)((System.Drawing.FontStyle.Bold | System.Drawing.FontStyle.Italic))));
            this.label101.ForeColor = System.Drawing.Color.Black;
            this.label101.Location = new System.Drawing.Point(212, 140);
            this.label101.Name = "label101";
            this.label101.Size = new System.Drawing.Size(20, 19);
            this.label101.TabIndex = 107;
            this.label101.Text = "A";
            // 
            // txtCh5Power
            // 
            this.txtCh5Power.BackColor = System.Drawing.Color.White;
            this.txtCh5Power.BorderStyle = System.Windows.Forms.BorderStyle.None;
            this.txtCh5Power.Font = new System.Drawing.Font("宋体", 14F);
            this.txtCh5Power.ForeColor = System.Drawing.Color.Black;
            this.txtCh5Power.Location = new System.Drawing.Point(237, 140);
            this.txtCh5Power.Name = "txtCh5Power";
            this.txtCh5Power.ReadOnly = true;
            this.txtCh5Power.Size = new System.Drawing.Size(65, 22);
            this.txtCh5Power.TabIndex = 101;
            this.txtCh5Power.TextAlign = System.Windows.Forms.HorizontalAlignment.Center;
            // 
            // txtBCh5Status
            // 
            this.txtBCh5Status.BackColor = System.Drawing.Color.Red;
            this.txtBCh5Status.BorderStyle = System.Windows.Forms.BorderStyle.None;
            this.txtBCh5Status.Font = new System.Drawing.Font("宋体", 14F);
            this.txtBCh5Status.ForeColor = System.Drawing.Color.White;
            this.txtBCh5Status.Location = new System.Drawing.Point(511, 140);
            this.txtBCh5Status.Name = "txtBCh5Status";
            this.txtBCh5Status.ReadOnly = true;
            this.txtBCh5Status.Size = new System.Drawing.Size(78, 22);
            this.txtBCh5Status.TabIndex = 104;
            this.txtBCh5Status.Text = "关闭";
            this.txtBCh5Status.TextAlign = System.Windows.Forms.HorizontalAlignment.Center;
            // 
            // label102
            // 
            this.label102.AutoSize = true;
            this.label102.Font = new System.Drawing.Font("Times New Roman", 12F, ((System.Drawing.FontStyle)((System.Drawing.FontStyle.Bold | System.Drawing.FontStyle.Italic))));
            this.label102.ForeColor = System.Drawing.Color.Black;
            this.label102.Location = new System.Drawing.Point(127, 140);
            this.label102.Name = "label102";
            this.label102.Size = new System.Drawing.Size(20, 19);
            this.label102.TabIndex = 106;
            this.label102.Text = "V";
            // 
            // txtCh5Time
            // 
            this.txtCh5Time.BackColor = System.Drawing.Color.White;
            this.txtCh5Time.BorderStyle = System.Windows.Forms.BorderStyle.None;
            this.txtCh5Time.Font = new System.Drawing.Font("宋体", 14F);
            this.txtCh5Time.ForeColor = System.Drawing.Color.Black;
            this.txtCh5Time.Location = new System.Drawing.Point(338, 140);
            this.txtCh5Time.Name = "txtCh5Time";
            this.txtCh5Time.ReadOnly = true;
            this.txtCh5Time.Size = new System.Drawing.Size(165, 22);
            this.txtCh5Time.TabIndex = 105;
            this.txtCh5Time.TextAlign = System.Windows.Forms.HorizontalAlignment.Center;
            // 
            // txtBCh4Logo
            // 
            this.txtBCh4Logo.BackColor = System.Drawing.Color.DarkSeaGreen;
            this.txtBCh4Logo.BorderStyle = System.Windows.Forms.BorderStyle.None;
            this.txtBCh4Logo.Font = new System.Drawing.Font("宋体", 14F);
            this.txtBCh4Logo.ForeColor = System.Drawing.Color.White;
            this.txtBCh4Logo.Location = new System.Drawing.Point(594, 112);
            this.txtBCh4Logo.Name = "txtBCh4Logo";
            this.txtBCh4Logo.ReadOnly = true;
            this.txtBCh4Logo.Size = new System.Drawing.Size(42, 22);
            this.txtBCh4Logo.TabIndex = 100;
            this.txtBCh4Logo.Text = "正常";
            this.txtBCh4Logo.TextAlign = System.Windows.Forms.HorizontalAlignment.Center;
            // 
            // txtCh4Vol
            // 
            this.txtCh4Vol.BackColor = System.Drawing.Color.White;
            this.txtCh4Vol.BorderStyle = System.Windows.Forms.BorderStyle.None;
            this.txtCh4Vol.Font = new System.Drawing.Font("宋体", 14F);
            this.txtCh4Vol.ForeColor = System.Drawing.Color.Red;
            this.txtCh4Vol.Location = new System.Drawing.Point(67, 112);
            this.txtCh4Vol.Name = "txtCh4Vol";
            this.txtCh4Vol.ReadOnly = true;
            this.txtCh4Vol.Size = new System.Drawing.Size(60, 22);
            this.txtCh4Vol.TabIndex = 94;
            this.txtCh4Vol.TextAlign = System.Windows.Forms.HorizontalAlignment.Center;
            // 
            // label42
            // 
            this.label42.AutoSize = true;
            this.label42.Font = new System.Drawing.Font("Times New Roman", 12F, ((System.Drawing.FontStyle)((System.Drawing.FontStyle.Bold | System.Drawing.FontStyle.Italic))));
            this.label42.ForeColor = System.Drawing.Color.Black;
            this.label42.Location = new System.Drawing.Point(308, 112);
            this.label42.Name = "label42";
            this.label42.Size = new System.Drawing.Size(23, 19);
            this.label42.TabIndex = 99;
            this.label42.Text = "W";
            // 
            // txtCh4Cur
            // 
            this.txtCh4Cur.BackColor = System.Drawing.Color.White;
            this.txtCh4Cur.BorderStyle = System.Windows.Forms.BorderStyle.None;
            this.txtCh4Cur.Font = new System.Drawing.Font("宋体", 14F);
            this.txtCh4Cur.ForeColor = System.Drawing.Color.Blue;
            this.txtCh4Cur.Location = new System.Drawing.Point(152, 112);
            this.txtCh4Cur.Name = "txtCh4Cur";
            this.txtCh4Cur.ReadOnly = true;
            this.txtCh4Cur.Size = new System.Drawing.Size(60, 22);
            this.txtCh4Cur.TabIndex = 93;
            this.txtCh4Cur.TextAlign = System.Windows.Forms.HorizontalAlignment.Center;
            // 
            // label47
            // 
            this.label47.AutoSize = true;
            this.label47.Font = new System.Drawing.Font("Times New Roman", 12F, ((System.Drawing.FontStyle)((System.Drawing.FontStyle.Bold | System.Drawing.FontStyle.Italic))));
            this.label47.ForeColor = System.Drawing.Color.Black;
            this.label47.Location = new System.Drawing.Point(212, 112);
            this.label47.Name = "label47";
            this.label47.Size = new System.Drawing.Size(20, 19);
            this.label47.TabIndex = 98;
            this.label47.Text = "A";
            // 
            // txtCh4Power
            // 
            this.txtCh4Power.BackColor = System.Drawing.Color.White;
            this.txtCh4Power.BorderStyle = System.Windows.Forms.BorderStyle.None;
            this.txtCh4Power.Font = new System.Drawing.Font("宋体", 14F);
            this.txtCh4Power.ForeColor = System.Drawing.Color.Black;
            this.txtCh4Power.Location = new System.Drawing.Point(237, 112);
            this.txtCh4Power.Name = "txtCh4Power";
            this.txtCh4Power.ReadOnly = true;
            this.txtCh4Power.Size = new System.Drawing.Size(65, 22);
            this.txtCh4Power.TabIndex = 92;
            this.txtCh4Power.TextAlign = System.Windows.Forms.HorizontalAlignment.Center;
            // 
            // txtBCh4Status
            // 
            this.txtBCh4Status.BackColor = System.Drawing.Color.Red;
            this.txtBCh4Status.BorderStyle = System.Windows.Forms.BorderStyle.None;
            this.txtBCh4Status.Font = new System.Drawing.Font("宋体", 14F);
            this.txtBCh4Status.ForeColor = System.Drawing.Color.White;
            this.txtBCh4Status.Location = new System.Drawing.Point(511, 112);
            this.txtBCh4Status.Name = "txtBCh4Status";
            this.txtBCh4Status.ReadOnly = true;
            this.txtBCh4Status.Size = new System.Drawing.Size(78, 22);
            this.txtBCh4Status.TabIndex = 95;
            this.txtBCh4Status.Text = "关闭";
            this.txtBCh4Status.TextAlign = System.Windows.Forms.HorizontalAlignment.Center;
            // 
            // label48
            // 
            this.label48.AutoSize = true;
            this.label48.Font = new System.Drawing.Font("Times New Roman", 12F, ((System.Drawing.FontStyle)((System.Drawing.FontStyle.Bold | System.Drawing.FontStyle.Italic))));
            this.label48.ForeColor = System.Drawing.Color.Black;
            this.label48.Location = new System.Drawing.Point(127, 112);
            this.label48.Name = "label48";
            this.label48.Size = new System.Drawing.Size(20, 19);
            this.label48.TabIndex = 97;
            this.label48.Text = "V";
            // 
            // txtCh4Time
            // 
            this.txtCh4Time.BackColor = System.Drawing.Color.White;
            this.txtCh4Time.BorderStyle = System.Windows.Forms.BorderStyle.None;
            this.txtCh4Time.Font = new System.Drawing.Font("宋体", 14F);
            this.txtCh4Time.ForeColor = System.Drawing.Color.Black;
            this.txtCh4Time.Location = new System.Drawing.Point(338, 112);
            this.txtCh4Time.Name = "txtCh4Time";
            this.txtCh4Time.ReadOnly = true;
            this.txtCh4Time.Size = new System.Drawing.Size(165, 22);
            this.txtCh4Time.TabIndex = 96;
            this.txtCh4Time.TextAlign = System.Windows.Forms.HorizontalAlignment.Center;
            // 
            // txtBCh3Logo
            // 
            this.txtBCh3Logo.BackColor = System.Drawing.Color.DarkSeaGreen;
            this.txtBCh3Logo.BorderStyle = System.Windows.Forms.BorderStyle.None;
            this.txtBCh3Logo.Font = new System.Drawing.Font("宋体", 14F);
            this.txtBCh3Logo.ForeColor = System.Drawing.Color.White;
            this.txtBCh3Logo.Location = new System.Drawing.Point(594, 84);
            this.txtBCh3Logo.Name = "txtBCh3Logo";
            this.txtBCh3Logo.ReadOnly = true;
            this.txtBCh3Logo.Size = new System.Drawing.Size(42, 22);
            this.txtBCh3Logo.TabIndex = 91;
            this.txtBCh3Logo.Text = "正常";
            this.txtBCh3Logo.TextAlign = System.Windows.Forms.HorizontalAlignment.Center;
            // 
            // label1
            // 
            this.label1.AutoSize = true;
            this.label1.Font = new System.Drawing.Font("Times New Roman", 12F, ((System.Drawing.FontStyle)((System.Drawing.FontStyle.Bold | System.Drawing.FontStyle.Italic))));
            this.label1.ForeColor = System.Drawing.Color.Black;
            this.label1.Location = new System.Drawing.Point(308, 84);
            this.label1.Name = "label1";
            this.label1.Size = new System.Drawing.Size(23, 19);
            this.label1.TabIndex = 90;
            this.label1.Text = "W";
            // 
            // txtCh3Cur
            // 
            this.txtCh3Cur.BackColor = System.Drawing.Color.White;
            this.txtCh3Cur.BorderStyle = System.Windows.Forms.BorderStyle.None;
            this.txtCh3Cur.Font = new System.Drawing.Font("宋体", 14F);
            this.txtCh3Cur.ForeColor = System.Drawing.Color.Blue;
            this.txtCh3Cur.Location = new System.Drawing.Point(152, 84);
            this.txtCh3Cur.Name = "txtCh3Cur";
            this.txtCh3Cur.ReadOnly = true;
            this.txtCh3Cur.Size = new System.Drawing.Size(60, 22);
            this.txtCh3Cur.TabIndex = 84;
            this.txtCh3Cur.TextAlign = System.Windows.Forms.HorizontalAlignment.Center;
            // 
            // label27
            // 
            this.label27.AutoSize = true;
            this.label27.Font = new System.Drawing.Font("Times New Roman", 12F, ((System.Drawing.FontStyle)((System.Drawing.FontStyle.Bold | System.Drawing.FontStyle.Italic))));
            this.label27.ForeColor = System.Drawing.Color.Black;
            this.label27.Location = new System.Drawing.Point(212, 84);
            this.label27.Name = "label27";
            this.label27.Size = new System.Drawing.Size(20, 19);
            this.label27.TabIndex = 89;
            this.label27.Text = "A";
            // 
            // txtCh3Power
            // 
            this.txtCh3Power.BackColor = System.Drawing.Color.White;
            this.txtCh3Power.BorderStyle = System.Windows.Forms.BorderStyle.None;
            this.txtCh3Power.Font = new System.Drawing.Font("宋体", 14F);
            this.txtCh3Power.ForeColor = System.Drawing.Color.Black;
            this.txtCh3Power.Location = new System.Drawing.Point(237, 84);
            this.txtCh3Power.Name = "txtCh3Power";
            this.txtCh3Power.ReadOnly = true;
            this.txtCh3Power.Size = new System.Drawing.Size(65, 22);
            this.txtCh3Power.TabIndex = 83;
            this.txtCh3Power.TextAlign = System.Windows.Forms.HorizontalAlignment.Center;
            // 
            // txtBCh3Status
            // 
            this.txtBCh3Status.BackColor = System.Drawing.Color.Red;
            this.txtBCh3Status.BorderStyle = System.Windows.Forms.BorderStyle.None;
            this.txtBCh3Status.Font = new System.Drawing.Font("宋体", 14F);
            this.txtBCh3Status.ForeColor = System.Drawing.Color.White;
            this.txtBCh3Status.Location = new System.Drawing.Point(511, 84);
            this.txtBCh3Status.Name = "txtBCh3Status";
            this.txtBCh3Status.ReadOnly = true;
            this.txtBCh3Status.Size = new System.Drawing.Size(78, 22);
            this.txtBCh3Status.TabIndex = 86;
            this.txtBCh3Status.Text = "关闭";
            this.txtBCh3Status.TextAlign = System.Windows.Forms.HorizontalAlignment.Center;
            // 
            // label28
            // 
            this.label28.AutoSize = true;
            this.label28.Font = new System.Drawing.Font("Times New Roman", 12F, ((System.Drawing.FontStyle)((System.Drawing.FontStyle.Bold | System.Drawing.FontStyle.Italic))));
            this.label28.ForeColor = System.Drawing.Color.Black;
            this.label28.Location = new System.Drawing.Point(127, 84);
            this.label28.Name = "label28";
            this.label28.Size = new System.Drawing.Size(20, 19);
            this.label28.TabIndex = 88;
            this.label28.Text = "V";
            // 
            // txtCh3Time
            // 
            this.txtCh3Time.BackColor = System.Drawing.Color.White;
            this.txtCh3Time.BorderStyle = System.Windows.Forms.BorderStyle.None;
            this.txtCh3Time.Font = new System.Drawing.Font("宋体", 14F);
            this.txtCh3Time.ForeColor = System.Drawing.Color.Black;
            this.txtCh3Time.Location = new System.Drawing.Point(338, 84);
            this.txtCh3Time.Name = "txtCh3Time";
            this.txtCh3Time.ReadOnly = true;
            this.txtCh3Time.Size = new System.Drawing.Size(165, 22);
            this.txtCh3Time.TabIndex = 87;
            this.txtCh3Time.TextAlign = System.Windows.Forms.HorizontalAlignment.Center;
            // 
            // txtBCh2Logo
            // 
            this.txtBCh2Logo.BackColor = System.Drawing.Color.DarkSeaGreen;
            this.txtBCh2Logo.BorderStyle = System.Windows.Forms.BorderStyle.None;
            this.txtBCh2Logo.Font = new System.Drawing.Font("宋体", 14F);
            this.txtBCh2Logo.ForeColor = System.Drawing.Color.White;
            this.txtBCh2Logo.Location = new System.Drawing.Point(594, 56);
            this.txtBCh2Logo.Name = "txtBCh2Logo";
            this.txtBCh2Logo.ReadOnly = true;
            this.txtBCh2Logo.Size = new System.Drawing.Size(42, 22);
            this.txtBCh2Logo.TabIndex = 82;
            this.txtBCh2Logo.Text = "正常";
            this.txtBCh2Logo.TextAlign = System.Windows.Forms.HorizontalAlignment.Center;
            // 
            // txtBCh1Logo
            // 
            this.txtBCh1Logo.BackColor = System.Drawing.Color.DarkSeaGreen;
            this.txtBCh1Logo.BorderStyle = System.Windows.Forms.BorderStyle.None;
            this.txtBCh1Logo.Font = new System.Drawing.Font("宋体", 14F);
            this.txtBCh1Logo.ForeColor = System.Drawing.Color.White;
            this.txtBCh1Logo.Location = new System.Drawing.Point(594, 28);
            this.txtBCh1Logo.Name = "txtBCh1Logo";
            this.txtBCh1Logo.ReadOnly = true;
            this.txtBCh1Logo.Size = new System.Drawing.Size(42, 22);
            this.txtBCh1Logo.TabIndex = 81;
            this.txtBCh1Logo.Text = "正常";
            this.txtBCh1Logo.TextAlign = System.Windows.Forms.HorizontalAlignment.Center;
            // 
            // txtCh2Vol
            // 
            this.txtCh2Vol.BackColor = System.Drawing.Color.White;
            this.txtCh2Vol.BorderStyle = System.Windows.Forms.BorderStyle.None;
            this.txtCh2Vol.Font = new System.Drawing.Font("宋体", 14F);
            this.txtCh2Vol.ForeColor = System.Drawing.Color.Red;
            this.txtCh2Vol.Location = new System.Drawing.Point(67, 56);
            this.txtCh2Vol.Name = "txtCh2Vol";
            this.txtCh2Vol.ReadOnly = true;
            this.txtCh2Vol.Size = new System.Drawing.Size(60, 22);
            this.txtCh2Vol.TabIndex = 70;
            this.txtCh2Vol.TextAlign = System.Windows.Forms.HorizontalAlignment.Center;
            // 
            // txtCh1Vol
            // 
            this.txtCh1Vol.BackColor = System.Drawing.Color.White;
            this.txtCh1Vol.BorderStyle = System.Windows.Forms.BorderStyle.None;
            this.txtCh1Vol.Font = new System.Drawing.Font("宋体", 14F);
            this.txtCh1Vol.ForeColor = System.Drawing.Color.Red;
            this.txtCh1Vol.Location = new System.Drawing.Point(67, 28);
            this.txtCh1Vol.Name = "txtCh1Vol";
            this.txtCh1Vol.ReadOnly = true;
            this.txtCh1Vol.Size = new System.Drawing.Size(60, 22);
            this.txtCh1Vol.TabIndex = 69;
            this.txtCh1Vol.TextAlign = System.Windows.Forms.HorizontalAlignment.Center;
            // 
            // label50
            // 
            this.label50.AutoSize = true;
            this.label50.Font = new System.Drawing.Font("Times New Roman", 12F, ((System.Drawing.FontStyle)((System.Drawing.FontStyle.Bold | System.Drawing.FontStyle.Italic))));
            this.label50.ForeColor = System.Drawing.Color.Black;
            this.label50.Location = new System.Drawing.Point(308, 56);
            this.label50.Name = "label50";
            this.label50.Size = new System.Drawing.Size(23, 19);
            this.label50.TabIndex = 80;
            this.label50.Text = "W";
            // 
            // label49
            // 
            this.label49.AutoSize = true;
            this.label49.Font = new System.Drawing.Font("Times New Roman", 12F, ((System.Drawing.FontStyle)((System.Drawing.FontStyle.Bold | System.Drawing.FontStyle.Italic))));
            this.label49.ForeColor = System.Drawing.Color.Black;
            this.label49.Location = new System.Drawing.Point(308, 28);
            this.label49.Name = "label49";
            this.label49.Size = new System.Drawing.Size(23, 19);
            this.label49.TabIndex = 79;
            this.label49.Text = "W";
            // 
            // txtCh2Cur
            // 
            this.txtCh2Cur.BackColor = System.Drawing.Color.White;
            this.txtCh2Cur.BorderStyle = System.Windows.Forms.BorderStyle.None;
            this.txtCh2Cur.Font = new System.Drawing.Font("宋体", 14F);
            this.txtCh2Cur.ForeColor = System.Drawing.Color.Blue;
            this.txtCh2Cur.Location = new System.Drawing.Point(152, 56);
            this.txtCh2Cur.Name = "txtCh2Cur";
            this.txtCh2Cur.ReadOnly = true;
            this.txtCh2Cur.Size = new System.Drawing.Size(60, 22);
            this.txtCh2Cur.TabIndex = 68;
            this.txtCh2Cur.TextAlign = System.Windows.Forms.HorizontalAlignment.Center;
            // 
            // txtCh1Cur
            // 
            this.txtCh1Cur.BackColor = System.Drawing.Color.White;
            this.txtCh1Cur.BorderStyle = System.Windows.Forms.BorderStyle.None;
            this.txtCh1Cur.Font = new System.Drawing.Font("宋体", 14F);
            this.txtCh1Cur.ForeColor = System.Drawing.Color.Blue;
            this.txtCh1Cur.Location = new System.Drawing.Point(152, 28);
            this.txtCh1Cur.Name = "txtCh1Cur";
            this.txtCh1Cur.ReadOnly = true;
            this.txtCh1Cur.Size = new System.Drawing.Size(60, 22);
            this.txtCh1Cur.TabIndex = 65;
            this.txtCh1Cur.TextAlign = System.Windows.Forms.HorizontalAlignment.Center;
            // 
            // label45
            // 
            this.label45.AutoSize = true;
            this.label45.Font = new System.Drawing.Font("Times New Roman", 12F, ((System.Drawing.FontStyle)((System.Drawing.FontStyle.Bold | System.Drawing.FontStyle.Italic))));
            this.label45.ForeColor = System.Drawing.Color.Black;
            this.label45.Location = new System.Drawing.Point(212, 56);
            this.label45.Name = "label45";
            this.label45.Size = new System.Drawing.Size(20, 19);
            this.label45.TabIndex = 78;
            this.label45.Text = "A";
            // 
            // txtCh2Power
            // 
            this.txtCh2Power.BackColor = System.Drawing.Color.White;
            this.txtCh2Power.BorderStyle = System.Windows.Forms.BorderStyle.None;
            this.txtCh2Power.Font = new System.Drawing.Font("宋体", 14F);
            this.txtCh2Power.ForeColor = System.Drawing.Color.Black;
            this.txtCh2Power.Location = new System.Drawing.Point(237, 56);
            this.txtCh2Power.Name = "txtCh2Power";
            this.txtCh2Power.ReadOnly = true;
            this.txtCh2Power.Size = new System.Drawing.Size(65, 22);
            this.txtCh2Power.TabIndex = 67;
            this.txtCh2Power.TextAlign = System.Windows.Forms.HorizontalAlignment.Center;
            // 
            // label44
            // 
            this.label44.AutoSize = true;
            this.label44.Font = new System.Drawing.Font("Times New Roman", 12F, ((System.Drawing.FontStyle)((System.Drawing.FontStyle.Bold | System.Drawing.FontStyle.Italic))));
            this.label44.ForeColor = System.Drawing.Color.Black;
            this.label44.Location = new System.Drawing.Point(212, 28);
            this.label44.Name = "label44";
            this.label44.Size = new System.Drawing.Size(20, 19);
            this.label44.TabIndex = 77;
            this.label44.Text = "A";
            // 
            // txtCh1Power
            // 
            this.txtCh1Power.BackColor = System.Drawing.Color.White;
            this.txtCh1Power.BorderStyle = System.Windows.Forms.BorderStyle.None;
            this.txtCh1Power.Font = new System.Drawing.Font("宋体", 14F);
            this.txtCh1Power.ForeColor = System.Drawing.Color.Black;
            this.txtCh1Power.Location = new System.Drawing.Point(237, 28);
            this.txtCh1Power.Name = "txtCh1Power";
            this.txtCh1Power.ReadOnly = true;
            this.txtCh1Power.Size = new System.Drawing.Size(65, 22);
            this.txtCh1Power.TabIndex = 66;
            this.txtCh1Power.TextAlign = System.Windows.Forms.HorizontalAlignment.Center;
            // 
            // txtBCh1Status
            // 
            this.txtBCh1Status.BackColor = System.Drawing.Color.Red;
            this.txtBCh1Status.BorderStyle = System.Windows.Forms.BorderStyle.None;
            this.txtBCh1Status.Font = new System.Drawing.Font("宋体", 14F);
            this.txtBCh1Status.ForeColor = System.Drawing.Color.White;
            this.txtBCh1Status.Location = new System.Drawing.Point(511, 28);
            this.txtBCh1Status.Name = "txtBCh1Status";
            this.txtBCh1Status.ReadOnly = true;
            this.txtBCh1Status.Size = new System.Drawing.Size(78, 22);
            this.txtBCh1Status.TabIndex = 72;
            this.txtBCh1Status.Text = "关闭";
            this.txtBCh1Status.TextAlign = System.Windows.Forms.HorizontalAlignment.Center;
            // 
            // txtBCh2Status
            // 
            this.txtBCh2Status.BackColor = System.Drawing.Color.Red;
            this.txtBCh2Status.BorderStyle = System.Windows.Forms.BorderStyle.None;
            this.txtBCh2Status.Font = new System.Drawing.Font("宋体", 14F);
            this.txtBCh2Status.ForeColor = System.Drawing.Color.White;
            this.txtBCh2Status.Location = new System.Drawing.Point(511, 56);
            this.txtBCh2Status.Name = "txtBCh2Status";
            this.txtBCh2Status.ReadOnly = true;
            this.txtBCh2Status.Size = new System.Drawing.Size(78, 22);
            this.txtBCh2Status.TabIndex = 73;
            this.txtBCh2Status.Text = "关闭";
            this.txtBCh2Status.TextAlign = System.Windows.Forms.HorizontalAlignment.Center;
            // 
            // txtCh1Time
            // 
            this.txtCh1Time.BackColor = System.Drawing.Color.White;
            this.txtCh1Time.BorderStyle = System.Windows.Forms.BorderStyle.None;
            this.txtCh1Time.Font = new System.Drawing.Font("宋体", 14F);
            this.txtCh1Time.ForeColor = System.Drawing.Color.Black;
            this.txtCh1Time.Location = new System.Drawing.Point(338, 28);
            this.txtCh1Time.Name = "txtCh1Time";
            this.txtCh1Time.ReadOnly = true;
            this.txtCh1Time.Size = new System.Drawing.Size(165, 22);
            this.txtCh1Time.TabIndex = 71;
            this.txtCh1Time.TextAlign = System.Windows.Forms.HorizontalAlignment.Center;
            // 
            // label32
            // 
            this.label32.AutoSize = true;
            this.label32.Font = new System.Drawing.Font("Times New Roman", 12F, ((System.Drawing.FontStyle)((System.Drawing.FontStyle.Bold | System.Drawing.FontStyle.Italic))));
            this.label32.ForeColor = System.Drawing.Color.Black;
            this.label32.Location = new System.Drawing.Point(127, 56);
            this.label32.Name = "label32";
            this.label32.Size = new System.Drawing.Size(20, 19);
            this.label32.TabIndex = 76;
            this.label32.Text = "V";
            // 
            // txtCh2Time
            // 
            this.txtCh2Time.BackColor = System.Drawing.Color.White;
            this.txtCh2Time.BorderStyle = System.Windows.Forms.BorderStyle.None;
            this.txtCh2Time.Font = new System.Drawing.Font("宋体", 14F);
            this.txtCh2Time.ForeColor = System.Drawing.Color.Black;
            this.txtCh2Time.Location = new System.Drawing.Point(338, 56);
            this.txtCh2Time.Name = "txtCh2Time";
            this.txtCh2Time.ReadOnly = true;
            this.txtCh2Time.Size = new System.Drawing.Size(165, 22);
            this.txtCh2Time.TabIndex = 74;
            this.txtCh2Time.TextAlign = System.Windows.Forms.HorizontalAlignment.Center;
            // 
            // label30
            // 
            this.label30.AutoSize = true;
            this.label30.Font = new System.Drawing.Font("Times New Roman", 12F, ((System.Drawing.FontStyle)((System.Drawing.FontStyle.Bold | System.Drawing.FontStyle.Italic))));
            this.label30.ForeColor = System.Drawing.Color.Black;
            this.label30.Location = new System.Drawing.Point(127, 28);
            this.label30.Name = "label30";
            this.label30.Size = new System.Drawing.Size(20, 19);
            this.label30.TabIndex = 75;
            this.label30.Text = "V";
            // 
            // label100
            // 
            this.label100.AutoSize = true;
            this.label100.Font = new System.Drawing.Font("Times New Roman", 12F, System.Drawing.FontStyle.Bold);
            this.label100.ForeColor = System.Drawing.Color.Black;
            this.label100.Location = new System.Drawing.Point(2, 140);
            this.label100.Name = "label100";
            this.label100.Size = new System.Drawing.Size(68, 19);
            this.label100.TabIndex = 60;
            this.label100.Text = "通道5：";
            // 
            // label43
            // 
            this.label43.AutoSize = true;
            this.label43.Font = new System.Drawing.Font("Times New Roman", 12F, System.Drawing.FontStyle.Bold);
            this.label43.ForeColor = System.Drawing.Color.Black;
            this.label43.Location = new System.Drawing.Point(2, 112);
            this.label43.Name = "label43";
            this.label43.Size = new System.Drawing.Size(68, 19);
            this.label43.TabIndex = 59;
            this.label43.Text = "通道4：";
            // 
            // label4
            // 
            this.label4.AutoSize = true;
            this.label4.Font = new System.Drawing.Font("Times New Roman", 12F, System.Drawing.FontStyle.Bold);
            this.label4.ForeColor = System.Drawing.Color.Black;
            this.label4.Location = new System.Drawing.Point(2, 84);
            this.label4.Name = "label4";
            this.label4.Size = new System.Drawing.Size(68, 19);
            this.label4.TabIndex = 58;
            this.label4.Text = "通道3：";
            // 
            // label5
            // 
            this.label5.AutoSize = true;
            this.label5.Font = new System.Drawing.Font("Times New Roman", 12F, System.Drawing.FontStyle.Bold);
            this.label5.ForeColor = System.Drawing.Color.Black;
            this.label5.Location = new System.Drawing.Point(2, 28);
            this.label5.Name = "label5";
            this.label5.Size = new System.Drawing.Size(68, 19);
            this.label5.TabIndex = 56;
            this.label5.Text = "通道1：";
            // 
            // label6
            // 
            this.label6.AutoSize = true;
            this.label6.Font = new System.Drawing.Font("Times New Roman", 12F, System.Drawing.FontStyle.Bold);
            this.label6.ForeColor = System.Drawing.Color.Black;
            this.label6.Location = new System.Drawing.Point(2, 56);
            this.label6.Name = "label6";
            this.label6.Size = new System.Drawing.Size(68, 19);
            this.label6.TabIndex = 57;
            this.label6.Text = "通道2：";
            // 
            // groupBox14
            // 
            this.groupBox14.Controls.Add(this.HCh1Close);
            this.groupBox14.Controls.Add(this.HCh2Close);
            this.groupBox14.Controls.Add(this.HCh1Open);
            this.groupBox14.Controls.Add(this.HCh2Open);
            this.groupBox14.Controls.Add(this.label114);
            this.groupBox14.Controls.Add(this.label113);
            this.groupBox14.Controls.Add(this.label9);
            this.groupBox14.Controls.Add(this.Ch5Open);
            this.groupBox14.Controls.Add(this.Ch5Close);
            this.groupBox14.Controls.Add(this.label7);
            this.groupBox14.Controls.Add(this.Ch4Open);
            this.groupBox14.Controls.Add(this.Ch4Close);
            this.groupBox14.Controls.Add(this.label2);
            this.groupBox14.Controls.Add(this.Ch3Open);
            this.groupBox14.Controls.Add(this.Ch3Close);
            this.groupBox14.Controls.Add(this.label39);
            this.groupBox14.Controls.Add(this.label35);
            this.groupBox14.Controls.Add(this.Ch1Open);
            this.groupBox14.Controls.Add(this.Ch1Close);
            this.groupBox14.Controls.Add(this.Ch2Open);
            this.groupBox14.Controls.Add(this.Ch2Close);
            this.groupBox14.Dock = System.Windows.Forms.DockStyle.Fill;
            this.groupBox14.Font = new System.Drawing.Font("宋体", 14.25F, System.Drawing.FontStyle.Bold, System.Drawing.GraphicsUnit.Point, ((byte)(134)));
            this.groupBox14.ForeColor = System.Drawing.Color.Maroon;
            this.groupBox14.Location = new System.Drawing.Point(348, 181);
            this.groupBox14.Name = "groupBox14";
            this.groupBox14.Size = new System.Drawing.Size(297, 230);
            this.groupBox14.TabIndex = 10;
            this.groupBox14.TabStop = false;
            this.groupBox14.Text = "接驳盒通道开关指令";
            // 
            // HCh1Close
            // 
            this.HCh1Close.Enabled = false;
            this.HCh1Close.FlatStyle = System.Windows.Forms.FlatStyle.Popup;
            this.HCh1Close.Font = new System.Drawing.Font("楷体", 12F);
            this.HCh1Close.ForeColor = System.Drawing.Color.Red;
            this.HCh1Close.Location = new System.Drawing.Point(208, 30);
            this.HCh1Close.Name = "HCh1Close";
            this.HCh1Close.Size = new System.Drawing.Size(75, 24);
            this.HCh1Close.TabIndex = 39;
            this.HCh1Close.Text = "关闭";
            this.HCh1Close.UseVisualStyleBackColor = true;
            this.HCh1Close.Click += new System.EventHandler(this.HCh1Close_Click);
            // 
            // HCh2Close
            // 
            this.HCh2Close.Enabled = false;
            this.HCh2Close.FlatStyle = System.Windows.Forms.FlatStyle.Popup;
            this.HCh2Close.Font = new System.Drawing.Font("楷体", 12F);
            this.HCh2Close.ForeColor = System.Drawing.Color.Red;
            this.HCh2Close.Location = new System.Drawing.Point(208, 57);
            this.HCh2Close.Name = "HCh2Close";
            this.HCh2Close.Size = new System.Drawing.Size(75, 24);
            this.HCh2Close.TabIndex = 40;
            this.HCh2Close.Text = "关闭";
            this.HCh2Close.UseVisualStyleBackColor = true;
            this.HCh2Close.Click += new System.EventHandler(this.HCh2Close_Click);
            // 
            // HCh1Open
            // 
            this.HCh1Open.FlatStyle = System.Windows.Forms.FlatStyle.Popup;
            this.HCh1Open.Font = new System.Drawing.Font("楷体", 12F);
            this.HCh1Open.ForeColor = System.Drawing.Color.FromArgb(((int)(((byte)(0)))), ((int)(((byte)(192)))), ((int)(((byte)(192)))));
            this.HCh1Open.Location = new System.Drawing.Point(113, 30);
            this.HCh1Open.Name = "HCh1Open";
            this.HCh1Open.Size = new System.Drawing.Size(75, 24);
            this.HCh1Open.TabIndex = 37;
            this.HCh1Open.Text = "打开";
            this.HCh1Open.UseVisualStyleBackColor = true;
            this.HCh1Open.Click += new System.EventHandler(this.button19_Click);
            // 
            // HCh2Open
            // 
            this.HCh2Open.FlatStyle = System.Windows.Forms.FlatStyle.Popup;
            this.HCh2Open.Font = new System.Drawing.Font("楷体", 12F);
            this.HCh2Open.ForeColor = System.Drawing.Color.FromArgb(((int)(((byte)(0)))), ((int)(((byte)(192)))), ((int)(((byte)(192)))));
            this.HCh2Open.Location = new System.Drawing.Point(113, 57);
            this.HCh2Open.Name = "HCh2Open";
            this.HCh2Open.Size = new System.Drawing.Size(75, 24);
            this.HCh2Open.TabIndex = 38;
            this.HCh2Open.Text = "打开";
            this.HCh2Open.UseVisualStyleBackColor = true;
            this.HCh2Open.Click += new System.EventHandler(this.HCh2Open_Click);
            // 
            // label114
            // 
            this.label114.AutoSize = true;
            this.label114.Font = new System.Drawing.Font("Times New Roman", 12F, System.Drawing.FontStyle.Bold);
            this.label114.ForeColor = System.Drawing.Color.Black;
            this.label114.Location = new System.Drawing.Point(11, 56);
            this.label114.Name = "label114";
            this.label114.Size = new System.Drawing.Size(85, 19);
            this.label114.TabIndex = 36;
            this.label114.Text = "主通道2：";
            // 
            // label113
            // 
            this.label113.AutoSize = true;
            this.label113.Font = new System.Drawing.Font("Times New Roman", 12F, System.Drawing.FontStyle.Bold);
            this.label113.ForeColor = System.Drawing.Color.Black;
            this.label113.Location = new System.Drawing.Point(11, 28);
            this.label113.Name = "label113";
            this.label113.Size = new System.Drawing.Size(85, 19);
            this.label113.TabIndex = 35;
            this.label113.Text = "主通道1：";
            // 
            // label9
            // 
            this.label9.AutoSize = true;
            this.label9.Font = new System.Drawing.Font("Times New Roman", 12F, System.Drawing.FontStyle.Bold);
            this.label9.ForeColor = System.Drawing.Color.Black;
            this.label9.Location = new System.Drawing.Point(11, 196);
            this.label9.Name = "label9";
            this.label9.Size = new System.Drawing.Size(85, 19);
            this.label9.TabIndex = 33;
            this.label9.Text = "次通道5：";
            // 
            // Ch5Open
            // 
            this.Ch5Open.FlatStyle = System.Windows.Forms.FlatStyle.Popup;
            this.Ch5Open.Font = new System.Drawing.Font("楷体", 12F);
            this.Ch5Open.ForeColor = System.Drawing.Color.FromArgb(((int)(((byte)(0)))), ((int)(((byte)(192)))), ((int)(((byte)(192)))));
            this.Ch5Open.Location = new System.Drawing.Point(113, 192);
            this.Ch5Open.Name = "Ch5Open";
            this.Ch5Open.Size = new System.Drawing.Size(75, 24);
            this.Ch5Open.TabIndex = 31;
            this.Ch5Open.Text = "打开";
            this.Ch5Open.UseVisualStyleBackColor = true;
            this.Ch5Open.Click += new System.EventHandler(this.Ch5Open_Click);
            // 
            // Ch5Close
            // 
            this.Ch5Close.Enabled = false;
            this.Ch5Close.FlatStyle = System.Windows.Forms.FlatStyle.Popup;
            this.Ch5Close.Font = new System.Drawing.Font("楷体", 12F);
            this.Ch5Close.ForeColor = System.Drawing.Color.Red;
            this.Ch5Close.Location = new System.Drawing.Point(208, 192);
            this.Ch5Close.Name = "Ch5Close";
            this.Ch5Close.Size = new System.Drawing.Size(75, 24);
            this.Ch5Close.TabIndex = 32;
            this.Ch5Close.Text = "关闭";
            this.Ch5Close.UseVisualStyleBackColor = true;
            this.Ch5Close.Click += new System.EventHandler(this.Ch5Close_Click);
            // 
            // label7
            // 
            this.label7.AutoSize = true;
            this.label7.Font = new System.Drawing.Font("Times New Roman", 12F, System.Drawing.FontStyle.Bold);
            this.label7.ForeColor = System.Drawing.Color.Black;
            this.label7.Location = new System.Drawing.Point(11, 168);
            this.label7.Name = "label7";
            this.label7.Size = new System.Drawing.Size(85, 19);
            this.label7.TabIndex = 30;
            this.label7.Text = "次通道4：";
            // 
            // Ch4Open
            // 
            this.Ch4Open.FlatStyle = System.Windows.Forms.FlatStyle.Popup;
            this.Ch4Open.Font = new System.Drawing.Font("楷体", 12F);
            this.Ch4Open.ForeColor = System.Drawing.Color.FromArgb(((int)(((byte)(0)))), ((int)(((byte)(192)))), ((int)(((byte)(192)))));
            this.Ch4Open.Location = new System.Drawing.Point(113, 165);
            this.Ch4Open.Name = "Ch4Open";
            this.Ch4Open.Size = new System.Drawing.Size(75, 24);
            this.Ch4Open.TabIndex = 28;
            this.Ch4Open.Text = "打开";
            this.Ch4Open.UseVisualStyleBackColor = true;
            this.Ch4Open.Click += new System.EventHandler(this.Ch4Open_Click);
            // 
            // Ch4Close
            // 
            this.Ch4Close.Enabled = false;
            this.Ch4Close.FlatStyle = System.Windows.Forms.FlatStyle.Popup;
            this.Ch4Close.Font = new System.Drawing.Font("楷体", 12F);
            this.Ch4Close.ForeColor = System.Drawing.Color.Red;
            this.Ch4Close.Location = new System.Drawing.Point(208, 165);
            this.Ch4Close.Name = "Ch4Close";
            this.Ch4Close.Size = new System.Drawing.Size(75, 24);
            this.Ch4Close.TabIndex = 29;
            this.Ch4Close.Text = "关闭";
            this.Ch4Close.UseVisualStyleBackColor = true;
            this.Ch4Close.Click += new System.EventHandler(this.Ch4Close_Click);
            // 
            // label2
            // 
            this.label2.AutoSize = true;
            this.label2.Font = new System.Drawing.Font("Times New Roman", 12F, System.Drawing.FontStyle.Bold);
            this.label2.ForeColor = System.Drawing.Color.Black;
            this.label2.Location = new System.Drawing.Point(11, 140);
            this.label2.Name = "label2";
            this.label2.Size = new System.Drawing.Size(85, 19);
            this.label2.TabIndex = 27;
            this.label2.Text = "次通道3：";
            // 
            // Ch3Open
            // 
            this.Ch3Open.FlatStyle = System.Windows.Forms.FlatStyle.Popup;
            this.Ch3Open.Font = new System.Drawing.Font("楷体", 12F);
            this.Ch3Open.ForeColor = System.Drawing.Color.FromArgb(((int)(((byte)(0)))), ((int)(((byte)(192)))), ((int)(((byte)(192)))));
            this.Ch3Open.Location = new System.Drawing.Point(113, 138);
            this.Ch3Open.Name = "Ch3Open";
            this.Ch3Open.Size = new System.Drawing.Size(75, 24);
            this.Ch3Open.TabIndex = 25;
            this.Ch3Open.Text = "打开";
            this.Ch3Open.UseVisualStyleBackColor = true;
            this.Ch3Open.Click += new System.EventHandler(this.Ch3Open_Click);
            // 
            // Ch3Close
            // 
            this.Ch3Close.Enabled = false;
            this.Ch3Close.FlatStyle = System.Windows.Forms.FlatStyle.Popup;
            this.Ch3Close.Font = new System.Drawing.Font("楷体", 12F);
            this.Ch3Close.ForeColor = System.Drawing.Color.Red;
            this.Ch3Close.Location = new System.Drawing.Point(208, 138);
            this.Ch3Close.Name = "Ch3Close";
            this.Ch3Close.Size = new System.Drawing.Size(75, 24);
            this.Ch3Close.TabIndex = 26;
            this.Ch3Close.Text = "关闭";
            this.Ch3Close.UseVisualStyleBackColor = true;
            this.Ch3Close.Click += new System.EventHandler(this.Ch3Close_Click);
            // 
            // label39
            // 
            this.label39.AutoSize = true;
            this.label39.Font = new System.Drawing.Font("Times New Roman", 12F, System.Drawing.FontStyle.Bold);
            this.label39.ForeColor = System.Drawing.Color.Black;
            this.label39.Location = new System.Drawing.Point(11, 112);
            this.label39.Name = "label39";
            this.label39.Size = new System.Drawing.Size(85, 19);
            this.label39.TabIndex = 23;
            this.label39.Text = "次通道2：";
            // 
            // label35
            // 
            this.label35.AutoSize = true;
            this.label35.Font = new System.Drawing.Font("Times New Roman", 12F, System.Drawing.FontStyle.Bold);
            this.label35.ForeColor = System.Drawing.Color.Black;
            this.label35.Location = new System.Drawing.Point(11, 84);
            this.label35.Name = "label35";
            this.label35.Size = new System.Drawing.Size(85, 19);
            this.label35.TabIndex = 22;
            this.label35.Text = "次通道1：";
            // 
            // Ch1Open
            // 
            this.Ch1Open.FlatStyle = System.Windows.Forms.FlatStyle.Popup;
            this.Ch1Open.Font = new System.Drawing.Font("楷体", 12F);
            this.Ch1Open.ForeColor = System.Drawing.Color.FromArgb(((int)(((byte)(0)))), ((int)(((byte)(192)))), ((int)(((byte)(192)))));
            this.Ch1Open.Location = new System.Drawing.Point(113, 84);
            this.Ch1Open.Name = "Ch1Open";
            this.Ch1Open.Size = new System.Drawing.Size(75, 24);
            this.Ch1Open.TabIndex = 21;
            this.Ch1Open.Text = "打开";
            this.Ch1Open.UseVisualStyleBackColor = true;
            this.Ch1Open.Click += new System.EventHandler(this.chThreeOpen_Click);
            // 
            // Ch1Close
            // 
            this.Ch1Close.Enabled = false;
            this.Ch1Close.FlatStyle = System.Windows.Forms.FlatStyle.Popup;
            this.Ch1Close.Font = new System.Drawing.Font("楷体", 12F);
            this.Ch1Close.ForeColor = System.Drawing.Color.Red;
            this.Ch1Close.Location = new System.Drawing.Point(208, 84);
            this.Ch1Close.Name = "Ch1Close";
            this.Ch1Close.Size = new System.Drawing.Size(75, 24);
            this.Ch1Close.TabIndex = 22;
            this.Ch1Close.Text = "关闭";
            this.Ch1Close.UseVisualStyleBackColor = true;
            this.Ch1Close.Click += new System.EventHandler(this.chThreeClose_Click);
            // 
            // Ch2Open
            // 
            this.Ch2Open.FlatStyle = System.Windows.Forms.FlatStyle.Popup;
            this.Ch2Open.Font = new System.Drawing.Font("楷体", 12F);
            this.Ch2Open.ForeColor = System.Drawing.Color.FromArgb(((int)(((byte)(0)))), ((int)(((byte)(192)))), ((int)(((byte)(192)))));
            this.Ch2Open.Location = new System.Drawing.Point(113, 111);
            this.Ch2Open.Name = "Ch2Open";
            this.Ch2Open.Size = new System.Drawing.Size(75, 24);
            this.Ch2Open.TabIndex = 23;
            this.Ch2Open.Text = "打开";
            this.Ch2Open.UseVisualStyleBackColor = true;
            this.Ch2Open.Click += new System.EventHandler(this.chFourOpen_Click);
            // 
            // Ch2Close
            // 
            this.Ch2Close.Enabled = false;
            this.Ch2Close.FlatStyle = System.Windows.Forms.FlatStyle.Popup;
            this.Ch2Close.Font = new System.Drawing.Font("楷体", 12F);
            this.Ch2Close.ForeColor = System.Drawing.Color.Red;
            this.Ch2Close.Location = new System.Drawing.Point(208, 111);
            this.Ch2Close.Name = "Ch2Close";
            this.Ch2Close.Size = new System.Drawing.Size(75, 24);
            this.Ch2Close.TabIndex = 24;
            this.Ch2Close.Text = "关闭";
            this.Ch2Close.UseVisualStyleBackColor = true;
            this.Ch2Close.Click += new System.EventHandler(this.chFourClose_Click);
            // 
            // groupBox11
            // 
            this.groupBox11.Controls.Add(this.txtACh2Logo);
            this.groupBox11.Controls.Add(this.txtACh2Vol);
            this.groupBox11.Controls.Add(this.label31);
            this.groupBox11.Controls.Add(this.txtACh2Cur);
            this.groupBox11.Controls.Add(this.label103);
            this.groupBox11.Controls.Add(this.txtACh2Power);
            this.groupBox11.Controls.Add(this.txtACh2Status);
            this.groupBox11.Controls.Add(this.label104);
            this.groupBox11.Controls.Add(this.txtACh2Time);
            this.groupBox11.Controls.Add(this.txtACh1Logo);
            this.groupBox11.Controls.Add(this.txtACh0Logo);
            this.groupBox11.Controls.Add(this.txtACh1Vol);
            this.groupBox11.Controls.Add(this.txtACh0Vol);
            this.groupBox11.Controls.Add(this.label105);
            this.groupBox11.Controls.Add(this.label106);
            this.groupBox11.Controls.Add(this.txtACh1Cur);
            this.groupBox11.Controls.Add(this.txtACh0Cur);
            this.groupBox11.Controls.Add(this.label107);
            this.groupBox11.Controls.Add(this.txtACh1Power);
            this.groupBox11.Controls.Add(this.label108);
            this.groupBox11.Controls.Add(this.txtACh0Power);
            this.groupBox11.Controls.Add(this.txtACh0Status);
            this.groupBox11.Controls.Add(this.txtACh1Status);
            this.groupBox11.Controls.Add(this.txtACh0Time);
            this.groupBox11.Controls.Add(this.label109);
            this.groupBox11.Controls.Add(this.txtACh1Time);
            this.groupBox11.Controls.Add(this.label110);
            this.groupBox11.Controls.Add(this.label12);
            this.groupBox11.Controls.Add(this.label14);
            this.groupBox11.Controls.Add(this.label26);
            this.groupBox11.Dock = System.Windows.Forms.DockStyle.Top;
            this.groupBox11.Font = new System.Drawing.Font("宋体", 14.25F, System.Drawing.FontStyle.Bold, System.Drawing.GraphicsUnit.Point, ((byte)(134)));
            this.groupBox11.ForeColor = System.Drawing.Color.Maroon;
            this.groupBox11.Location = new System.Drawing.Point(0, 0);
            this.groupBox11.Name = "groupBox11";
            this.groupBox11.Size = new System.Drawing.Size(648, 113);
            this.groupBox11.TabIndex = 7;
            this.groupBox11.TabStop = false;
            this.groupBox11.Text = "主接驳盒电能输出通道信息";
            // 
            // txtACh2Logo
            // 
            this.txtACh2Logo.BackColor = System.Drawing.Color.DarkSeaGreen;
            this.txtACh2Logo.BorderStyle = System.Windows.Forms.BorderStyle.None;
            this.txtACh2Logo.Font = new System.Drawing.Font("宋体", 14F);
            this.txtACh2Logo.ForeColor = System.Drawing.Color.White;
            this.txtACh2Logo.Location = new System.Drawing.Point(597, 84);
            this.txtACh2Logo.Name = "txtACh2Logo";
            this.txtACh2Logo.ReadOnly = true;
            this.txtACh2Logo.Size = new System.Drawing.Size(42, 22);
            this.txtACh2Logo.TabIndex = 118;
            this.txtACh2Logo.Text = "正常";
            this.txtACh2Logo.TextAlign = System.Windows.Forms.HorizontalAlignment.Center;
            // 
            // txtACh2Vol
            // 
            this.txtACh2Vol.BackColor = System.Drawing.Color.White;
            this.txtACh2Vol.BorderStyle = System.Windows.Forms.BorderStyle.None;
            this.txtACh2Vol.Font = new System.Drawing.Font("宋体", 14F);
            this.txtACh2Vol.ForeColor = System.Drawing.Color.Red;
            this.txtACh2Vol.Location = new System.Drawing.Point(70, 84);
            this.txtACh2Vol.Name = "txtACh2Vol";
            this.txtACh2Vol.ReadOnly = true;
            this.txtACh2Vol.Size = new System.Drawing.Size(60, 22);
            this.txtACh2Vol.TabIndex = 112;
            this.txtACh2Vol.TextAlign = System.Windows.Forms.HorizontalAlignment.Center;
            // 
            // label31
            // 
            this.label31.AutoSize = true;
            this.label31.Font = new System.Drawing.Font("Times New Roman", 12F, ((System.Drawing.FontStyle)((System.Drawing.FontStyle.Bold | System.Drawing.FontStyle.Italic))));
            this.label31.ForeColor = System.Drawing.Color.Black;
            this.label31.Location = new System.Drawing.Point(311, 84);
            this.label31.Name = "label31";
            this.label31.Size = new System.Drawing.Size(23, 19);
            this.label31.TabIndex = 117;
            this.label31.Text = "W";
            // 
            // txtACh2Cur
            // 
            this.txtACh2Cur.BackColor = System.Drawing.Color.White;
            this.txtACh2Cur.BorderStyle = System.Windows.Forms.BorderStyle.None;
            this.txtACh2Cur.Font = new System.Drawing.Font("宋体", 14F);
            this.txtACh2Cur.ForeColor = System.Drawing.Color.Blue;
            this.txtACh2Cur.Location = new System.Drawing.Point(155, 84);
            this.txtACh2Cur.Name = "txtACh2Cur";
            this.txtACh2Cur.ReadOnly = true;
            this.txtACh2Cur.Size = new System.Drawing.Size(60, 22);
            this.txtACh2Cur.TabIndex = 111;
            this.txtACh2Cur.TextAlign = System.Windows.Forms.HorizontalAlignment.Center;
            // 
            // label103
            // 
            this.label103.AutoSize = true;
            this.label103.Font = new System.Drawing.Font("Times New Roman", 12F, ((System.Drawing.FontStyle)((System.Drawing.FontStyle.Bold | System.Drawing.FontStyle.Italic))));
            this.label103.ForeColor = System.Drawing.Color.Black;
            this.label103.Location = new System.Drawing.Point(215, 84);
            this.label103.Name = "label103";
            this.label103.Size = new System.Drawing.Size(20, 19);
            this.label103.TabIndex = 116;
            this.label103.Text = "A";
            // 
            // txtACh2Power
            // 
            this.txtACh2Power.BackColor = System.Drawing.Color.White;
            this.txtACh2Power.BorderStyle = System.Windows.Forms.BorderStyle.None;
            this.txtACh2Power.Font = new System.Drawing.Font("宋体", 14F);
            this.txtACh2Power.ForeColor = System.Drawing.Color.Black;
            this.txtACh2Power.Location = new System.Drawing.Point(240, 84);
            this.txtACh2Power.Name = "txtACh2Power";
            this.txtACh2Power.ReadOnly = true;
            this.txtACh2Power.Size = new System.Drawing.Size(65, 22);
            this.txtACh2Power.TabIndex = 110;
            this.txtACh2Power.TextAlign = System.Windows.Forms.HorizontalAlignment.Center;
            // 
            // txtACh2Status
            // 
            this.txtACh2Status.BackColor = System.Drawing.Color.Red;
            this.txtACh2Status.BorderStyle = System.Windows.Forms.BorderStyle.None;
            this.txtACh2Status.Font = new System.Drawing.Font("宋体", 14F);
            this.txtACh2Status.ForeColor = System.Drawing.Color.White;
            this.txtACh2Status.Location = new System.Drawing.Point(514, 84);
            this.txtACh2Status.Name = "txtACh2Status";
            this.txtACh2Status.ReadOnly = true;
            this.txtACh2Status.Size = new System.Drawing.Size(78, 22);
            this.txtACh2Status.TabIndex = 113;
            this.txtACh2Status.Text = "关闭";
            this.txtACh2Status.TextAlign = System.Windows.Forms.HorizontalAlignment.Center;
            // 
            // label104
            // 
            this.label104.AutoSize = true;
            this.label104.Font = new System.Drawing.Font("Times New Roman", 12F, ((System.Drawing.FontStyle)((System.Drawing.FontStyle.Bold | System.Drawing.FontStyle.Italic))));
            this.label104.ForeColor = System.Drawing.Color.Black;
            this.label104.Location = new System.Drawing.Point(130, 84);
            this.label104.Name = "label104";
            this.label104.Size = new System.Drawing.Size(20, 19);
            this.label104.TabIndex = 115;
            this.label104.Text = "V";
            // 
            // txtACh2Time
            // 
            this.txtACh2Time.BackColor = System.Drawing.Color.White;
            this.txtACh2Time.BorderStyle = System.Windows.Forms.BorderStyle.None;
            this.txtACh2Time.Font = new System.Drawing.Font("宋体", 14F);
            this.txtACh2Time.ForeColor = System.Drawing.Color.Black;
            this.txtACh2Time.Location = new System.Drawing.Point(341, 84);
            this.txtACh2Time.Name = "txtACh2Time";
            this.txtACh2Time.ReadOnly = true;
            this.txtACh2Time.Size = new System.Drawing.Size(165, 22);
            this.txtACh2Time.TabIndex = 114;
            this.txtACh2Time.TextAlign = System.Windows.Forms.HorizontalAlignment.Center;
            // 
            // txtACh1Logo
            // 
            this.txtACh1Logo.BackColor = System.Drawing.Color.DarkSeaGreen;
            this.txtACh1Logo.BorderStyle = System.Windows.Forms.BorderStyle.None;
            this.txtACh1Logo.Font = new System.Drawing.Font("宋体", 14F);
            this.txtACh1Logo.ForeColor = System.Drawing.Color.White;
            this.txtACh1Logo.Location = new System.Drawing.Point(597, 57);
            this.txtACh1Logo.Name = "txtACh1Logo";
            this.txtACh1Logo.ReadOnly = true;
            this.txtACh1Logo.Size = new System.Drawing.Size(42, 22);
            this.txtACh1Logo.TabIndex = 109;
            this.txtACh1Logo.Text = "正常";
            this.txtACh1Logo.TextAlign = System.Windows.Forms.HorizontalAlignment.Center;
            // 
            // txtACh0Logo
            // 
            this.txtACh0Logo.BackColor = System.Drawing.Color.DarkSeaGreen;
            this.txtACh0Logo.BorderStyle = System.Windows.Forms.BorderStyle.None;
            this.txtACh0Logo.Font = new System.Drawing.Font("宋体", 14F);
            this.txtACh0Logo.ForeColor = System.Drawing.Color.White;
            this.txtACh0Logo.Location = new System.Drawing.Point(597, 30);
            this.txtACh0Logo.Name = "txtACh0Logo";
            this.txtACh0Logo.ReadOnly = true;
            this.txtACh0Logo.Size = new System.Drawing.Size(42, 22);
            this.txtACh0Logo.TabIndex = 108;
            this.txtACh0Logo.Text = "正常";
            this.txtACh0Logo.TextAlign = System.Windows.Forms.HorizontalAlignment.Center;
            // 
            // txtACh1Vol
            // 
            this.txtACh1Vol.BackColor = System.Drawing.Color.White;
            this.txtACh1Vol.BorderStyle = System.Windows.Forms.BorderStyle.None;
            this.txtACh1Vol.Font = new System.Drawing.Font("宋体", 14F);
            this.txtACh1Vol.ForeColor = System.Drawing.Color.Red;
            this.txtACh1Vol.Location = new System.Drawing.Point(70, 57);
            this.txtACh1Vol.Name = "txtACh1Vol";
            this.txtACh1Vol.ReadOnly = true;
            this.txtACh1Vol.Size = new System.Drawing.Size(60, 22);
            this.txtACh1Vol.TabIndex = 97;
            this.txtACh1Vol.TextAlign = System.Windows.Forms.HorizontalAlignment.Center;
            // 
            // txtACh0Vol
            // 
            this.txtACh0Vol.BackColor = System.Drawing.Color.White;
            this.txtACh0Vol.BorderStyle = System.Windows.Forms.BorderStyle.None;
            this.txtACh0Vol.Font = new System.Drawing.Font("宋体", 14F);
            this.txtACh0Vol.ForeColor = System.Drawing.Color.Red;
            this.txtACh0Vol.Location = new System.Drawing.Point(70, 30);
            this.txtACh0Vol.Name = "txtACh0Vol";
            this.txtACh0Vol.ReadOnly = true;
            this.txtACh0Vol.Size = new System.Drawing.Size(60, 22);
            this.txtACh0Vol.TabIndex = 96;
            this.txtACh0Vol.TextAlign = System.Windows.Forms.HorizontalAlignment.Center;
            // 
            // label105
            // 
            this.label105.AutoSize = true;
            this.label105.Font = new System.Drawing.Font("Times New Roman", 12F, ((System.Drawing.FontStyle)((System.Drawing.FontStyle.Bold | System.Drawing.FontStyle.Italic))));
            this.label105.ForeColor = System.Drawing.Color.Black;
            this.label105.Location = new System.Drawing.Point(311, 57);
            this.label105.Name = "label105";
            this.label105.Size = new System.Drawing.Size(23, 19);
            this.label105.TabIndex = 107;
            this.label105.Text = "W";
            // 
            // label106
            // 
            this.label106.AutoSize = true;
            this.label106.Font = new System.Drawing.Font("Times New Roman", 12F, ((System.Drawing.FontStyle)((System.Drawing.FontStyle.Bold | System.Drawing.FontStyle.Italic))));
            this.label106.ForeColor = System.Drawing.Color.Black;
            this.label106.Location = new System.Drawing.Point(311, 30);
            this.label106.Name = "label106";
            this.label106.Size = new System.Drawing.Size(23, 19);
            this.label106.TabIndex = 106;
            this.label106.Text = "W";
            // 
            // txtACh1Cur
            // 
            this.txtACh1Cur.BackColor = System.Drawing.Color.White;
            this.txtACh1Cur.BorderStyle = System.Windows.Forms.BorderStyle.None;
            this.txtACh1Cur.Font = new System.Drawing.Font("宋体", 14F);
            this.txtACh1Cur.ForeColor = System.Drawing.Color.Blue;
            this.txtACh1Cur.Location = new System.Drawing.Point(155, 57);
            this.txtACh1Cur.Name = "txtACh1Cur";
            this.txtACh1Cur.ReadOnly = true;
            this.txtACh1Cur.Size = new System.Drawing.Size(60, 22);
            this.txtACh1Cur.TabIndex = 95;
            this.txtACh1Cur.TextAlign = System.Windows.Forms.HorizontalAlignment.Center;
            // 
            // txtACh0Cur
            // 
            this.txtACh0Cur.BackColor = System.Drawing.Color.White;
            this.txtACh0Cur.BorderStyle = System.Windows.Forms.BorderStyle.None;
            this.txtACh0Cur.Font = new System.Drawing.Font("宋体", 14F);
            this.txtACh0Cur.ForeColor = System.Drawing.Color.Blue;
            this.txtACh0Cur.Location = new System.Drawing.Point(155, 30);
            this.txtACh0Cur.Name = "txtACh0Cur";
            this.txtACh0Cur.ReadOnly = true;
            this.txtACh0Cur.Size = new System.Drawing.Size(60, 22);
            this.txtACh0Cur.TabIndex = 92;
            this.txtACh0Cur.TextAlign = System.Windows.Forms.HorizontalAlignment.Center;
            // 
            // label107
            // 
            this.label107.AutoSize = true;
            this.label107.Font = new System.Drawing.Font("Times New Roman", 12F, ((System.Drawing.FontStyle)((System.Drawing.FontStyle.Bold | System.Drawing.FontStyle.Italic))));
            this.label107.ForeColor = System.Drawing.Color.Black;
            this.label107.Location = new System.Drawing.Point(215, 57);
            this.label107.Name = "label107";
            this.label107.Size = new System.Drawing.Size(20, 19);
            this.label107.TabIndex = 105;
            this.label107.Text = "A";
            // 
            // txtACh1Power
            // 
            this.txtACh1Power.BackColor = System.Drawing.Color.White;
            this.txtACh1Power.BorderStyle = System.Windows.Forms.BorderStyle.None;
            this.txtACh1Power.Font = new System.Drawing.Font("宋体", 14F);
            this.txtACh1Power.ForeColor = System.Drawing.Color.Black;
            this.txtACh1Power.Location = new System.Drawing.Point(240, 57);
            this.txtACh1Power.Name = "txtACh1Power";
            this.txtACh1Power.ReadOnly = true;
            this.txtACh1Power.Size = new System.Drawing.Size(65, 22);
            this.txtACh1Power.TabIndex = 94;
            this.txtACh1Power.TextAlign = System.Windows.Forms.HorizontalAlignment.Center;
            // 
            // label108
            // 
            this.label108.AutoSize = true;
            this.label108.Font = new System.Drawing.Font("Times New Roman", 12F, ((System.Drawing.FontStyle)((System.Drawing.FontStyle.Bold | System.Drawing.FontStyle.Italic))));
            this.label108.ForeColor = System.Drawing.Color.Black;
            this.label108.Location = new System.Drawing.Point(215, 30);
            this.label108.Name = "label108";
            this.label108.Size = new System.Drawing.Size(20, 19);
            this.label108.TabIndex = 104;
            this.label108.Text = "A";
            // 
            // txtACh0Power
            // 
            this.txtACh0Power.BackColor = System.Drawing.Color.White;
            this.txtACh0Power.BorderStyle = System.Windows.Forms.BorderStyle.None;
            this.txtACh0Power.Font = new System.Drawing.Font("宋体", 14F);
            this.txtACh0Power.ForeColor = System.Drawing.Color.Black;
            this.txtACh0Power.Location = new System.Drawing.Point(240, 30);
            this.txtACh0Power.Name = "txtACh0Power";
            this.txtACh0Power.ReadOnly = true;
            this.txtACh0Power.Size = new System.Drawing.Size(65, 22);
            this.txtACh0Power.TabIndex = 93;
            this.txtACh0Power.TextAlign = System.Windows.Forms.HorizontalAlignment.Center;
            // 
            // txtACh0Status
            // 
            this.txtACh0Status.BackColor = System.Drawing.Color.Red;
            this.txtACh0Status.BorderStyle = System.Windows.Forms.BorderStyle.None;
            this.txtACh0Status.Font = new System.Drawing.Font("宋体", 14F);
            this.txtACh0Status.ForeColor = System.Drawing.Color.White;
            this.txtACh0Status.Location = new System.Drawing.Point(514, 30);
            this.txtACh0Status.Name = "txtACh0Status";
            this.txtACh0Status.ReadOnly = true;
            this.txtACh0Status.Size = new System.Drawing.Size(78, 22);
            this.txtACh0Status.TabIndex = 99;
            this.txtACh0Status.Text = "关闭";
            this.txtACh0Status.TextAlign = System.Windows.Forms.HorizontalAlignment.Center;
            // 
            // txtACh1Status
            // 
            this.txtACh1Status.BackColor = System.Drawing.Color.Red;
            this.txtACh1Status.BorderStyle = System.Windows.Forms.BorderStyle.None;
            this.txtACh1Status.Font = new System.Drawing.Font("宋体", 14F);
            this.txtACh1Status.ForeColor = System.Drawing.Color.White;
            this.txtACh1Status.Location = new System.Drawing.Point(514, 57);
            this.txtACh1Status.Name = "txtACh1Status";
            this.txtACh1Status.ReadOnly = true;
            this.txtACh1Status.Size = new System.Drawing.Size(78, 22);
            this.txtACh1Status.TabIndex = 100;
            this.txtACh1Status.Text = "关闭";
            this.txtACh1Status.TextAlign = System.Windows.Forms.HorizontalAlignment.Center;
            // 
            // txtACh0Time
            // 
            this.txtACh0Time.BackColor = System.Drawing.Color.White;
            this.txtACh0Time.BorderStyle = System.Windows.Forms.BorderStyle.None;
            this.txtACh0Time.Font = new System.Drawing.Font("宋体", 14F);
            this.txtACh0Time.ForeColor = System.Drawing.Color.Black;
            this.txtACh0Time.Location = new System.Drawing.Point(341, 30);
            this.txtACh0Time.Name = "txtACh0Time";
            this.txtACh0Time.ReadOnly = true;
            this.txtACh0Time.Size = new System.Drawing.Size(165, 22);
            this.txtACh0Time.TabIndex = 98;
            this.txtACh0Time.TextAlign = System.Windows.Forms.HorizontalAlignment.Center;
            // 
            // label109
            // 
            this.label109.AutoSize = true;
            this.label109.Font = new System.Drawing.Font("Times New Roman", 12F, ((System.Drawing.FontStyle)((System.Drawing.FontStyle.Bold | System.Drawing.FontStyle.Italic))));
            this.label109.ForeColor = System.Drawing.Color.Black;
            this.label109.Location = new System.Drawing.Point(130, 57);
            this.label109.Name = "label109";
            this.label109.Size = new System.Drawing.Size(20, 19);
            this.label109.TabIndex = 103;
            this.label109.Text = "V";
            // 
            // txtACh1Time
            // 
            this.txtACh1Time.BackColor = System.Drawing.Color.White;
            this.txtACh1Time.BorderStyle = System.Windows.Forms.BorderStyle.None;
            this.txtACh1Time.Font = new System.Drawing.Font("宋体", 14F);
            this.txtACh1Time.ForeColor = System.Drawing.Color.Black;
            this.txtACh1Time.Location = new System.Drawing.Point(341, 57);
            this.txtACh1Time.Name = "txtACh1Time";
            this.txtACh1Time.ReadOnly = true;
            this.txtACh1Time.Size = new System.Drawing.Size(165, 22);
            this.txtACh1Time.TabIndex = 101;
            this.txtACh1Time.TextAlign = System.Windows.Forms.HorizontalAlignment.Center;
            // 
            // label110
            // 
            this.label110.AutoSize = true;
            this.label110.Font = new System.Drawing.Font("Times New Roman", 12F, ((System.Drawing.FontStyle)((System.Drawing.FontStyle.Bold | System.Drawing.FontStyle.Italic))));
            this.label110.ForeColor = System.Drawing.Color.Black;
            this.label110.Location = new System.Drawing.Point(130, 30);
            this.label110.Name = "label110";
            this.label110.Size = new System.Drawing.Size(20, 19);
            this.label110.TabIndex = 102;
            this.label110.Text = "V";
            // 
            // label12
            // 
            this.label12.AutoSize = true;
            this.label12.Font = new System.Drawing.Font("Times New Roman", 12F, System.Drawing.FontStyle.Bold);
            this.label12.ForeColor = System.Drawing.Color.Black;
            this.label12.Location = new System.Drawing.Point(5, 84);
            this.label12.Name = "label12";
            this.label12.Size = new System.Drawing.Size(68, 19);
            this.label12.TabIndex = 61;
            this.label12.Text = "通道2：";
            // 
            // label14
            // 
            this.label14.AutoSize = true;
            this.label14.Font = new System.Drawing.Font("Times New Roman", 12F, System.Drawing.FontStyle.Bold);
            this.label14.ForeColor = System.Drawing.Color.Black;
            this.label14.Location = new System.Drawing.Point(5, 30);
            this.label14.Name = "label14";
            this.label14.Size = new System.Drawing.Size(68, 19);
            this.label14.TabIndex = 59;
            this.label14.Text = "通道0：";
            // 
            // label26
            // 
            this.label26.AutoSize = true;
            this.label26.Font = new System.Drawing.Font("Times New Roman", 12F, System.Drawing.FontStyle.Bold);
            this.label26.ForeColor = System.Drawing.Color.Black;
            this.label26.Location = new System.Drawing.Point(5, 57);
            this.label26.Name = "label26";
            this.label26.Size = new System.Drawing.Size(68, 19);
            this.label26.TabIndex = 60;
            this.label26.Text = "通道1：";
            // 
            // panel12
            // 
            this.panel12.Controls.Add(this.groupBox6);
            this.panel12.Dock = System.Windows.Forms.DockStyle.Fill;
            this.panel12.Location = new System.Drawing.Point(3, 3);
            this.panel12.Name = "panel12";
            this.tableLayoutPanel4.SetRowSpan(this.panel12, 2);
            this.panel12.Size = new System.Drawing.Size(487, 128);
            this.panel12.TabIndex = 13;
            // 
            // groupBox6
            // 
            this.groupBox6.AutoSize = true;
            this.groupBox6.AutoSizeMode = System.Windows.Forms.AutoSizeMode.GrowAndShrink;
            this.groupBox6.Controls.Add(this.dataGridView2);
            this.groupBox6.Dock = System.Windows.Forms.DockStyle.Fill;
            this.groupBox6.Font = new System.Drawing.Font("宋体", 14.25F, System.Drawing.FontStyle.Bold, System.Drawing.GraphicsUnit.Point, ((byte)(134)));
            this.groupBox6.ForeColor = System.Drawing.Color.Maroon;
            this.groupBox6.Location = new System.Drawing.Point(0, 0);
            this.groupBox6.Name = "groupBox6";
            this.groupBox6.Size = new System.Drawing.Size(487, 128);
            this.groupBox6.TabIndex = 10;
            this.groupBox6.TabStop = false;
            this.groupBox6.Text = "接驳盒故障值";
            // 
            // dataGridView2
            // 
            dataGridViewCellStyle19.BackColor = System.Drawing.Color.LightCyan;
            this.dataGridView2.AlternatingRowsDefaultCellStyle = dataGridViewCellStyle19;
            this.dataGridView2.AutoSizeColumnsMode = System.Windows.Forms.DataGridViewAutoSizeColumnsMode.Fill;
            this.dataGridView2.AutoSizeRowsMode = System.Windows.Forms.DataGridViewAutoSizeRowsMode.AllCells;
            this.dataGridView2.BackgroundColor = System.Drawing.SystemColors.Control;
            dataGridViewCellStyle20.Alignment = System.Windows.Forms.DataGridViewContentAlignment.MiddleLeft;
            dataGridViewCellStyle20.BackColor = System.Drawing.Color.FromArgb(((int)(((byte)(234)))), ((int)(((byte)(242)))), ((int)(((byte)(250)))));
            dataGridViewCellStyle20.Font = new System.Drawing.Font("宋体", 14.25F, System.Drawing.FontStyle.Bold, System.Drawing.GraphicsUnit.Point, ((byte)(134)));
            dataGridViewCellStyle20.ForeColor = System.Drawing.SystemColors.WindowText;
            dataGridViewCellStyle20.SelectionBackColor = System.Drawing.SystemColors.Highlight;
            dataGridViewCellStyle20.SelectionForeColor = System.Drawing.SystemColors.HighlightText;
            dataGridViewCellStyle20.WrapMode = System.Windows.Forms.DataGridViewTriState.True;
            this.dataGridView2.ColumnHeadersDefaultCellStyle = dataGridViewCellStyle20;
            this.dataGridView2.ColumnHeadersHeightSizeMode = System.Windows.Forms.DataGridViewColumnHeadersHeightSizeMode.AutoSize;
            dataGridViewCellStyle21.Alignment = System.Windows.Forms.DataGridViewContentAlignment.MiddleLeft;
            dataGridViewCellStyle21.BackColor = System.Drawing.Color.FromArgb(((int)(((byte)(251)))), ((int)(((byte)(251)))), ((int)(((byte)(243)))));
            dataGridViewCellStyle21.Font = new System.Drawing.Font("宋体", 14.25F, System.Drawing.FontStyle.Bold, System.Drawing.GraphicsUnit.Point, ((byte)(134)));
            dataGridViewCellStyle21.ForeColor = System.Drawing.Color.Maroon;
            dataGridViewCellStyle21.SelectionBackColor = System.Drawing.Color.FromArgb(((int)(((byte)(213)))), ((int)(((byte)(232)))), ((int)(((byte)(255)))));
            dataGridViewCellStyle21.SelectionForeColor = System.Drawing.SystemColors.ControlDarkDark;
            dataGridViewCellStyle21.WrapMode = System.Windows.Forms.DataGridViewTriState.False;
            this.dataGridView2.DefaultCellStyle = dataGridViewCellStyle21;
            this.dataGridView2.Dock = System.Windows.Forms.DockStyle.Fill;
            this.dataGridView2.EnableHeadersVisualStyles = false;
            this.dataGridView2.Location = new System.Drawing.Point(3, 25);
            this.dataGridView2.MultiSelect = false;
            this.dataGridView2.Name = "dataGridView2";
            dataGridViewCellStyle22.ForeColor = System.Drawing.Color.Black;
            this.dataGridView2.RowsDefaultCellStyle = dataGridViewCellStyle22;
            this.dataGridView2.RowTemplate.Height = 18;
            this.dataGridView2.Size = new System.Drawing.Size(481, 100);
            this.dataGridView2.TabIndex = 0;
            this.dataGridView2.RowPostPaint += new System.Windows.Forms.DataGridViewRowPostPaintEventHandler(this.dataGridView2_RowPostPaint);
            // 
            // mainInfo
            // 
            this.mainInfo.Controls.Add(this.sysInfo);
            this.mainInfo.Controls.Add(this.tabPage5);
            this.mainInfo.Controls.Add(this.tabPage4);
            this.mainInfo.Controls.Add(this.tabPage6);
            this.mainInfo.Controls.Add(this.tabPage2);
            this.mainInfo.Controls.Add(this.tabPage9);
            this.mainInfo.Controls.Add(this.tabPage1);
            this.mainInfo.Controls.Add(this.tabPage3);
            this.mainInfo.Dock = System.Windows.Forms.DockStyle.Fill;
            this.mainInfo.Font = new System.Drawing.Font("Times New Roman", 14.25F);
            this.mainInfo.Location = new System.Drawing.Point(0, 109);
            this.mainInfo.Name = "mainInfo";
            this.mainInfo.SelectedIndex = 0;
            this.mainInfo.Size = new System.Drawing.Size(1169, 573);
            this.mainInfo.TabIndex = 2;
            // 
            // tabPage4
            // 
            this.tabPage4.Controls.Add(this.tableLayoutPanel1);
            this.tabPage4.Font = new System.Drawing.Font("Times New Roman", 14.25F);
            this.tabPage4.Location = new System.Drawing.Point(4, 30);
            this.tabPage4.Name = "tabPage4";
            this.tabPage4.Size = new System.Drawing.Size(1161, 539);
            this.tabPage4.TabIndex = 8;
            this.tabPage4.Text = "水下视频1";
            this.tabPage4.UseVisualStyleBackColor = true;
            // 
            // tableLayoutPanel1
            // 
            this.tableLayoutPanel1.BackColor = System.Drawing.SystemColors.Control;
            this.tableLayoutPanel1.ColumnCount = 1;
            this.tableLayoutPanel1.ColumnStyles.Add(new System.Windows.Forms.ColumnStyle(System.Windows.Forms.SizeType.Percent, 100F));
            this.tableLayoutPanel1.Controls.Add(this.panel1, 0, 0);
            this.tableLayoutPanel1.Controls.Add(this.panel2, 0, 1);
            this.tableLayoutPanel1.Dock = System.Windows.Forms.DockStyle.Fill;
            this.tableLayoutPanel1.Location = new System.Drawing.Point(0, 0);
            this.tableLayoutPanel1.Name = "tableLayoutPanel1";
            this.tableLayoutPanel1.RowCount = 2;
            this.tableLayoutPanel1.RowStyles.Add(new System.Windows.Forms.RowStyle(System.Windows.Forms.SizeType.Percent, 8F));
            this.tableLayoutPanel1.RowStyles.Add(new System.Windows.Forms.RowStyle(System.Windows.Forms.SizeType.Percent, 92F));
            this.tableLayoutPanel1.Size = new System.Drawing.Size(1161, 539);
            this.tableLayoutPanel1.TabIndex = 0;
            // 
            // panel1
            // 
            this.panel1.BackColor = System.Drawing.Color.FromArgb(((int)(((byte)(207)))), ((int)(((byte)(221)))), ((int)(((byte)(238)))));
            this.panel1.Controls.Add(this.button18);
            this.panel1.Controls.Add(this.btnCamera);
            this.panel1.Controls.Add(this.txtAddr1);
            this.panel1.Controls.Add(this.label46);
            this.panel1.Dock = System.Windows.Forms.DockStyle.Fill;
            this.panel1.Location = new System.Drawing.Point(3, 3);
            this.panel1.Name = "panel1";
            this.panel1.Size = new System.Drawing.Size(1155, 37);
            this.panel1.TabIndex = 0;
            // 
            // button18
            // 
            this.button18.BackColor = System.Drawing.Color.DodgerBlue;
            this.button18.FlatStyle = System.Windows.Forms.FlatStyle.Flat;
            this.button18.Font = new System.Drawing.Font("宋体", 12F);
            this.button18.ForeColor = System.Drawing.Color.White;
            this.button18.Location = new System.Drawing.Point(1013, 3);
            this.button18.Name = "button18";
            this.button18.Size = new System.Drawing.Size(79, 28);
            this.button18.TabIndex = 3;
            this.button18.Text = "摄像头";
            this.button18.UseVisualStyleBackColor = false;
            this.button18.Click += new System.EventHandler(this.button18_Click);
            // 
            // btnCamera
            // 
            this.btnCamera.BackColor = System.Drawing.Color.DodgerBlue;
            this.btnCamera.FlatStyle = System.Windows.Forms.FlatStyle.Flat;
            this.btnCamera.Font = new System.Drawing.Font("宋体", 12F);
            this.btnCamera.ForeColor = System.Drawing.Color.White;
            this.btnCamera.Location = new System.Drawing.Point(892, 4);
            this.btnCamera.Name = "btnCamera";
            this.btnCamera.Size = new System.Drawing.Size(79, 28);
            this.btnCamera.TabIndex = 2;
            this.btnCamera.Text = "执行";
            this.btnCamera.UseVisualStyleBackColor = false;
            this.btnCamera.Click += new System.EventHandler(this.btnCamera_Click);
            // 
            // txtAddr1
            // 
            this.txtAddr1.Font = new System.Drawing.Font("Times New Roman", 12F, System.Drawing.FontStyle.Bold, System.Drawing.GraphicsUnit.Point, ((byte)(0)));
            this.txtAddr1.ForeColor = System.Drawing.Color.Blue;
            this.txtAddr1.Location = new System.Drawing.Point(243, 5);
            this.txtAddr1.Name = "txtAddr1";
            this.txtAddr1.Size = new System.Drawing.Size(562, 26);
            this.txtAddr1.TabIndex = 1;
            this.txtAddr1.Text = "200.1.1.64";
            this.txtAddr1.KeyDown += new System.Windows.Forms.KeyEventHandler(this.txtAddr_KeyDown);
            // 
            // label46
            // 
            this.label46.AutoSize = true;
            this.label46.Font = new System.Drawing.Font("宋体", 12F, System.Drawing.FontStyle.Bold, System.Drawing.GraphicsUnit.Point, ((byte)(134)));
            this.label46.Location = new System.Drawing.Point(64, 10);
            this.label46.Name = "label46";
            this.label46.Size = new System.Drawing.Size(76, 16);
            this.label46.TabIndex = 0;
            this.label46.Text = "地址栏：";
            // 
            // panel2
            // 
            this.panel2.Controls.Add(this.wb1);
            this.panel2.Dock = System.Windows.Forms.DockStyle.Fill;
            this.panel2.Location = new System.Drawing.Point(3, 46);
            this.panel2.Name = "panel2";
            this.panel2.Size = new System.Drawing.Size(1155, 490);
            this.panel2.TabIndex = 1;
            // 
            // wb1
            // 
            this.wb1.Dock = System.Windows.Forms.DockStyle.Fill;
            this.wb1.Location = new System.Drawing.Point(0, 0);
            this.wb1.MinimumSize = new System.Drawing.Size(20, 20);
            this.wb1.Name = "wb1";
            this.wb1.Size = new System.Drawing.Size(1155, 490);
            this.wb1.TabIndex = 0;
            // 
            // tabPage6
            // 
            this.tabPage6.BackColor = System.Drawing.Color.AliceBlue;
            this.tabPage6.Controls.Add(this.tableLayoutPanel2);
            this.tabPage6.Font = new System.Drawing.Font("Times New Roman", 14.25F);
            this.tabPage6.Location = new System.Drawing.Point(4, 30);
            this.tabPage6.Name = "tabPage6";
            this.tabPage6.Size = new System.Drawing.Size(1161, 539);
            this.tabPage6.TabIndex = 9;
            this.tabPage6.Text = "数据采集器";
            // 
            // tableLayoutPanel2
            // 
            this.tableLayoutPanel2.BackColor = System.Drawing.Color.AliceBlue;
            this.tableLayoutPanel2.ColumnCount = 3;
            this.tableLayoutPanel2.ColumnStyles.Add(new System.Windows.Forms.ColumnStyle(System.Windows.Forms.SizeType.Percent, 42.71844F));
            this.tableLayoutPanel2.ColumnStyles.Add(new System.Windows.Forms.ColumnStyle(System.Windows.Forms.SizeType.Percent, 0.6906216F));
            this.tableLayoutPanel2.ColumnStyles.Add(new System.Windows.Forms.ColumnStyle(System.Windows.Forms.SizeType.Percent, 56.59093F));
            this.tableLayoutPanel2.Controls.Add(this.groupBox16, 0, 0);
            this.tableLayoutPanel2.Controls.Add(this.groupBox17, 0, 1);
            this.tableLayoutPanel2.Controls.Add(this.groupBox18, 0, 2);
            this.tableLayoutPanel2.Controls.Add(this.panel6, 2, 0);
            this.tableLayoutPanel2.Dock = System.Windows.Forms.DockStyle.Fill;
            this.tableLayoutPanel2.Location = new System.Drawing.Point(0, 0);
            this.tableLayoutPanel2.Name = "tableLayoutPanel2";
            this.tableLayoutPanel2.RowCount = 3;
            this.tableLayoutPanel2.RowStyles.Add(new System.Windows.Forms.RowStyle(System.Windows.Forms.SizeType.Percent, 33.33333F));
            this.tableLayoutPanel2.RowStyles.Add(new System.Windows.Forms.RowStyle(System.Windows.Forms.SizeType.Percent, 24.44444F));
            this.tableLayoutPanel2.RowStyles.Add(new System.Windows.Forms.RowStyle(System.Windows.Forms.SizeType.Percent, 42F));
            this.tableLayoutPanel2.Size = new System.Drawing.Size(1161, 539);
            this.tableLayoutPanel2.TabIndex = 0;
            // 
            // groupBox16
            // 
            this.groupBox16.Controls.Add(this.dataGridView3);
            this.groupBox16.Dock = System.Windows.Forms.DockStyle.Fill;
            this.groupBox16.Font = new System.Drawing.Font("宋体", 14.25F, System.Drawing.FontStyle.Bold, System.Drawing.GraphicsUnit.Point, ((byte)(134)));
            this.groupBox16.ForeColor = System.Drawing.Color.Maroon;
            this.groupBox16.Location = new System.Drawing.Point(3, 3);
            this.groupBox16.Name = "groupBox16";
            this.groupBox16.Size = new System.Drawing.Size(489, 174);
            this.groupBox16.TabIndex = 0;
            this.groupBox16.TabStop = false;
            this.groupBox16.Text = "采集值";
            // 
            // dataGridView3
            // 
            dataGridViewCellStyle23.BackColor = System.Drawing.Color.LightCyan;
            this.dataGridView3.AlternatingRowsDefaultCellStyle = dataGridViewCellStyle23;
            this.dataGridView3.AutoSizeColumnsMode = System.Windows.Forms.DataGridViewAutoSizeColumnsMode.Fill;
            this.dataGridView3.BackgroundColor = System.Drawing.SystemColors.Control;
            dataGridViewCellStyle24.Alignment = System.Windows.Forms.DataGridViewContentAlignment.MiddleLeft;
            dataGridViewCellStyle24.BackColor = System.Drawing.Color.FromArgb(((int)(((byte)(234)))), ((int)(((byte)(242)))), ((int)(((byte)(250)))));
            dataGridViewCellStyle24.Font = new System.Drawing.Font("宋体", 14.25F, System.Drawing.FontStyle.Bold, System.Drawing.GraphicsUnit.Point, ((byte)(134)));
            dataGridViewCellStyle24.ForeColor = System.Drawing.SystemColors.WindowText;
            dataGridViewCellStyle24.SelectionBackColor = System.Drawing.SystemColors.Highlight;
            dataGridViewCellStyle24.SelectionForeColor = System.Drawing.SystemColors.HighlightText;
            dataGridViewCellStyle24.WrapMode = System.Windows.Forms.DataGridViewTriState.True;
            this.dataGridView3.ColumnHeadersDefaultCellStyle = dataGridViewCellStyle24;
            this.dataGridView3.ColumnHeadersHeightSizeMode = System.Windows.Forms.DataGridViewColumnHeadersHeightSizeMode.AutoSize;
            dataGridViewCellStyle25.Alignment = System.Windows.Forms.DataGridViewContentAlignment.MiddleLeft;
            dataGridViewCellStyle25.BackColor = System.Drawing.Color.FromArgb(((int)(((byte)(251)))), ((int)(((byte)(251)))), ((int)(((byte)(243)))));
            dataGridViewCellStyle25.Font = new System.Drawing.Font("宋体", 14.25F, System.Drawing.FontStyle.Bold, System.Drawing.GraphicsUnit.Point, ((byte)(134)));
            dataGridViewCellStyle25.ForeColor = System.Drawing.Color.Maroon;
            dataGridViewCellStyle25.SelectionBackColor = System.Drawing.Color.FromArgb(((int)(((byte)(213)))), ((int)(((byte)(232)))), ((int)(((byte)(255)))));
            dataGridViewCellStyle25.SelectionForeColor = System.Drawing.Color.Black;
            dataGridViewCellStyle25.WrapMode = System.Windows.Forms.DataGridViewTriState.False;
            this.dataGridView3.DefaultCellStyle = dataGridViewCellStyle25;
            this.dataGridView3.Dock = System.Windows.Forms.DockStyle.Fill;
            this.dataGridView3.EnableHeadersVisualStyles = false;
            this.dataGridView3.Location = new System.Drawing.Point(3, 25);
            this.dataGridView3.Name = "dataGridView3";
            dataGridViewCellStyle26.ForeColor = System.Drawing.Color.Black;
            this.dataGridView3.RowsDefaultCellStyle = dataGridViewCellStyle26;
            this.dataGridView3.RowTemplate.Height = 23;
            this.dataGridView3.Size = new System.Drawing.Size(483, 146);
            this.dataGridView3.TabIndex = 0;
            this.dataGridView3.RowPostPaint += new System.Windows.Forms.DataGridViewRowPostPaintEventHandler(this.dataGridView3_RowPostPaint);
            // 
            // groupBox17
            // 
            this.groupBox17.Controls.Add(this.dataGridView4);
            this.groupBox17.Dock = System.Windows.Forms.DockStyle.Fill;
            this.groupBox17.Font = new System.Drawing.Font("宋体", 14.25F, System.Drawing.FontStyle.Bold, System.Drawing.GraphicsUnit.Point, ((byte)(134)));
            this.groupBox17.ForeColor = System.Drawing.Color.Maroon;
            this.groupBox17.Location = new System.Drawing.Point(3, 183);
            this.groupBox17.Name = "groupBox17";
            this.groupBox17.Size = new System.Drawing.Size(489, 126);
            this.groupBox17.TabIndex = 1;
            this.groupBox17.TabStop = false;
            this.groupBox17.Text = "故障值";
            // 
            // dataGridView4
            // 
            dataGridViewCellStyle27.BackColor = System.Drawing.Color.LightCyan;
            this.dataGridView4.AlternatingRowsDefaultCellStyle = dataGridViewCellStyle27;
            this.dataGridView4.AutoSizeColumnsMode = System.Windows.Forms.DataGridViewAutoSizeColumnsMode.Fill;
            this.dataGridView4.BackgroundColor = System.Drawing.SystemColors.Control;
            dataGridViewCellStyle28.Alignment = System.Windows.Forms.DataGridViewContentAlignment.MiddleLeft;
            dataGridViewCellStyle28.BackColor = System.Drawing.Color.FromArgb(((int)(((byte)(234)))), ((int)(((byte)(242)))), ((int)(((byte)(250)))));
            dataGridViewCellStyle28.Font = new System.Drawing.Font("宋体", 14.25F, System.Drawing.FontStyle.Bold, System.Drawing.GraphicsUnit.Point, ((byte)(134)));
            dataGridViewCellStyle28.ForeColor = System.Drawing.SystemColors.WindowText;
            dataGridViewCellStyle28.SelectionBackColor = System.Drawing.SystemColors.Highlight;
            dataGridViewCellStyle28.SelectionForeColor = System.Drawing.SystemColors.HighlightText;
            dataGridViewCellStyle28.WrapMode = System.Windows.Forms.DataGridViewTriState.True;
            this.dataGridView4.ColumnHeadersDefaultCellStyle = dataGridViewCellStyle28;
            this.dataGridView4.ColumnHeadersHeightSizeMode = System.Windows.Forms.DataGridViewColumnHeadersHeightSizeMode.AutoSize;
            dataGridViewCellStyle29.Alignment = System.Windows.Forms.DataGridViewContentAlignment.MiddleLeft;
            dataGridViewCellStyle29.BackColor = System.Drawing.Color.FromArgb(((int)(((byte)(251)))), ((int)(((byte)(251)))), ((int)(((byte)(243)))));
            dataGridViewCellStyle29.Font = new System.Drawing.Font("宋体", 14.25F, System.Drawing.FontStyle.Bold, System.Drawing.GraphicsUnit.Point, ((byte)(134)));
            dataGridViewCellStyle29.ForeColor = System.Drawing.Color.Maroon;
            dataGridViewCellStyle29.SelectionBackColor = System.Drawing.Color.FromArgb(((int)(((byte)(213)))), ((int)(((byte)(232)))), ((int)(((byte)(255)))));
            dataGridViewCellStyle29.SelectionForeColor = System.Drawing.Color.Black;
            dataGridViewCellStyle29.WrapMode = System.Windows.Forms.DataGridViewTriState.False;
            this.dataGridView4.DefaultCellStyle = dataGridViewCellStyle29;
            this.dataGridView4.Dock = System.Windows.Forms.DockStyle.Fill;
            this.dataGridView4.EnableHeadersVisualStyles = false;
            this.dataGridView4.Location = new System.Drawing.Point(3, 25);
            this.dataGridView4.Name = "dataGridView4";
            dataGridViewCellStyle30.ForeColor = System.Drawing.Color.Black;
            this.dataGridView4.RowsDefaultCellStyle = dataGridViewCellStyle30;
            this.dataGridView4.RowTemplate.Height = 23;
            this.dataGridView4.Size = new System.Drawing.Size(483, 98);
            this.dataGridView4.TabIndex = 0;
            this.dataGridView4.RowPostPaint += new System.Windows.Forms.DataGridViewRowPostPaintEventHandler(this.dataGridView4_RowPostPaint);
            // 
            // groupBox18
            // 
            this.groupBox18.AutoSize = true;
            this.groupBox18.Controls.Add(this.groupBox19);
            this.groupBox18.Controls.Add(this.groupBox20);
            this.groupBox18.Dock = System.Windows.Forms.DockStyle.Fill;
            this.groupBox18.Font = new System.Drawing.Font("宋体", 14.25F, System.Drawing.FontStyle.Bold, System.Drawing.GraphicsUnit.Point, ((byte)(134)));
            this.groupBox18.ForeColor = System.Drawing.Color.Maroon;
            this.groupBox18.Location = new System.Drawing.Point(3, 315);
            this.groupBox18.Name = "groupBox18";
            this.groupBox18.Size = new System.Drawing.Size(489, 221);
            this.groupBox18.TabIndex = 9;
            this.groupBox18.TabStop = false;
            this.groupBox18.Text = "网络控制";
            // 
            // groupBox19
            // 
            this.groupBox19.Controls.Add(this.btnFaultConfig);
            this.groupBox19.Controls.Add(this.faultConnect);
            this.groupBox19.Controls.Add(this.button1);
            this.groupBox19.Controls.Add(this.txtDataCollectPort);
            this.groupBox19.Controls.Add(this.txtDataCollectIP);
            this.groupBox19.Controls.Add(this.label53);
            this.groupBox19.Controls.Add(this.label54);
            this.groupBox19.Controls.Add(this.label55);
            this.groupBox19.Controls.Add(this.button4);
            this.groupBox19.Controls.Add(this.datacollectflag);
            this.groupBox19.Controls.Add(this.serverConnet);
            this.groupBox19.Controls.Add(this.label57);
            this.groupBox19.Controls.Add(this.label58);
            this.groupBox19.Controls.Add(this.label59);
            this.groupBox19.Controls.Add(this.checkBox1);
            this.groupBox19.Controls.Add(this.checkBox2);
            this.groupBox19.Controls.Add(this.faultPort);
            this.groupBox19.Controls.Add(this.serverPort);
            this.groupBox19.Controls.Add(this.faultIP);
            this.groupBox19.Controls.Add(this.serverIP);
            this.groupBox19.Dock = System.Windows.Forms.DockStyle.Top;
            this.groupBox19.Font = new System.Drawing.Font("宋体", 14.25F, System.Drawing.FontStyle.Bold, System.Drawing.GraphicsUnit.Point, ((byte)(134)));
            this.groupBox19.ForeColor = System.Drawing.Color.FromArgb(((int)(((byte)(0)))), ((int)(((byte)(0)))), ((int)(((byte)(192)))));
            this.groupBox19.Location = new System.Drawing.Point(3, 85);
            this.groupBox19.Name = "groupBox19";
            this.groupBox19.Size = new System.Drawing.Size(483, 155);
            this.groupBox19.TabIndex = 6;
            this.groupBox19.TabStop = false;
            this.groupBox19.Text = "地址与端口";
            // 
            // btnFaultConfig
            // 
            this.btnFaultConfig.FlatStyle = System.Windows.Forms.FlatStyle.Flat;
            this.btnFaultConfig.Font = new System.Drawing.Font("宋体", 12F, System.Drawing.FontStyle.Regular, System.Drawing.GraphicsUnit.Point, ((byte)(134)));
            this.btnFaultConfig.ForeColor = System.Drawing.Color.FromArgb(((int)(((byte)(0)))), ((int)(((byte)(192)))), ((int)(((byte)(192)))));
            this.btnFaultConfig.Location = new System.Drawing.Point(398, 102);
            this.btnFaultConfig.Name = "btnFaultConfig";
            this.btnFaultConfig.Size = new System.Drawing.Size(62, 25);
            this.btnFaultConfig.TabIndex = 21;
            this.btnFaultConfig.Text = "配置";
            this.btnFaultConfig.UseVisualStyleBackColor = true;
            // 
            // faultConnect
            // 
            this.faultConnect.AutoSize = true;
            this.faultConnect.Font = new System.Drawing.Font("宋体", 12F, System.Drawing.FontStyle.Regular, System.Drawing.GraphicsUnit.Point, ((byte)(134)));
            this.faultConnect.ForeColor = System.Drawing.Color.Red;
            this.faultConnect.Location = new System.Drawing.Point(339, 107);
            this.faultConnect.Name = "faultConnect";
            this.faultConnect.Size = new System.Drawing.Size(40, 16);
            this.faultConnect.TabIndex = 20;
            this.faultConnect.Text = "断开";
            // 
            // button1
            // 
            this.button1.FlatStyle = System.Windows.Forms.FlatStyle.Flat;
            this.button1.Font = new System.Drawing.Font("宋体", 12F, System.Drawing.FontStyle.Regular, System.Drawing.GraphicsUnit.Point, ((byte)(134)));
            this.button1.ForeColor = System.Drawing.Color.FromArgb(((int)(((byte)(0)))), ((int)(((byte)(192)))), ((int)(((byte)(192)))));
            this.button1.Location = new System.Drawing.Point(398, 70);
            this.button1.Name = "button1";
            this.button1.Size = new System.Drawing.Size(62, 25);
            this.button1.TabIndex = 19;
            this.button1.Text = "配置";
            this.button1.UseVisualStyleBackColor = true;
            this.button1.Click += new System.EventHandler(this.button1_Click);
            // 
            // txtDataCollectPort
            // 
            this.txtDataCollectPort.BackColor = System.Drawing.SystemColors.Control;
            this.txtDataCollectPort.BorderStyle = System.Windows.Forms.BorderStyle.None;
            this.txtDataCollectPort.Font = new System.Drawing.Font("Times New Roman", 12F);
            this.txtDataCollectPort.ForeColor = System.Drawing.Color.Black;
            this.txtDataCollectPort.Location = new System.Drawing.Point(262, 73);
            this.txtDataCollectPort.Name = "txtDataCollectPort";
            this.txtDataCollectPort.Size = new System.Drawing.Size(62, 19);
            this.txtDataCollectPort.TabIndex = 18;
            this.txtDataCollectPort.Text = "8001";
            this.txtDataCollectPort.TextAlign = System.Windows.Forms.HorizontalAlignment.Center;
            // 
            // txtDataCollectIP
            // 
            this.txtDataCollectIP.BackColor = System.Drawing.SystemColors.Control;
            this.txtDataCollectIP.BorderStyle = System.Windows.Forms.BorderStyle.None;
            this.txtDataCollectIP.Font = new System.Drawing.Font("Times New Roman", 12F);
            this.txtDataCollectIP.ForeColor = System.Drawing.Color.Black;
            this.txtDataCollectIP.Location = new System.Drawing.Point(112, 72);
            this.txtDataCollectIP.Name = "txtDataCollectIP";
            this.txtDataCollectIP.Size = new System.Drawing.Size(136, 19);
            this.txtDataCollectIP.TabIndex = 17;
            this.txtDataCollectIP.Text = "200.1.1.192";
            this.txtDataCollectIP.TextAlign = System.Windows.Forms.HorizontalAlignment.Center;
            // 
            // label53
            // 
            this.label53.AutoSize = true;
            this.label53.Font = new System.Drawing.Font("宋体", 12F, System.Drawing.FontStyle.Bold, System.Drawing.GraphicsUnit.Point, ((byte)(134)));
            this.label53.ForeColor = System.Drawing.Color.Black;
            this.label53.Location = new System.Drawing.Point(7, 72);
            this.label53.Name = "label53";
            this.label53.Size = new System.Drawing.Size(102, 16);
            this.label53.TabIndex = 16;
            this.label53.Text = "水下控制板:";
            // 
            // label54
            // 
            this.label54.AutoSize = true;
            this.label54.Font = new System.Drawing.Font("宋体", 12F, System.Drawing.FontStyle.Bold, System.Drawing.GraphicsUnit.Point, ((byte)(134)));
            this.label54.ForeColor = System.Drawing.Color.Black;
            this.label54.Location = new System.Drawing.Point(268, 17);
            this.label54.Name = "label54";
            this.label54.Size = new System.Drawing.Size(59, 16);
            this.label54.TabIndex = 13;
            this.label54.Text = "端口号";
            // 
            // label55
            // 
            this.label55.AutoSize = true;
            this.label55.Font = new System.Drawing.Font("Times New Roman", 12F, System.Drawing.FontStyle.Bold, System.Drawing.GraphicsUnit.Point, ((byte)(0)));
            this.label55.ForeColor = System.Drawing.Color.Black;
            this.label55.Location = new System.Drawing.Point(149, 17);
            this.label55.Name = "label55";
            this.label55.Size = new System.Drawing.Size(58, 19);
            this.label55.TabIndex = 13;
            this.label55.Text = "IP地址";
            // 
            // button4
            // 
            this.button4.FlatStyle = System.Windows.Forms.FlatStyle.Flat;
            this.button4.Font = new System.Drawing.Font("宋体", 12F, System.Drawing.FontStyle.Regular, System.Drawing.GraphicsUnit.Point, ((byte)(134)));
            this.button4.ForeColor = System.Drawing.Color.FromArgb(((int)(((byte)(0)))), ((int)(((byte)(192)))), ((int)(((byte)(192)))));
            this.button4.Location = new System.Drawing.Point(398, 37);
            this.button4.Name = "button4";
            this.button4.Size = new System.Drawing.Size(62, 25);
            this.button4.TabIndex = 15;
            this.button4.Text = "配置";
            this.button4.UseVisualStyleBackColor = true;
            // 
            // datacollectflag
            // 
            this.datacollectflag.AutoSize = true;
            this.datacollectflag.Font = new System.Drawing.Font("宋体", 12F, System.Drawing.FontStyle.Regular, System.Drawing.GraphicsUnit.Point, ((byte)(134)));
            this.datacollectflag.ForeColor = System.Drawing.Color.Red;
            this.datacollectflag.Location = new System.Drawing.Point(339, 75);
            this.datacollectflag.Name = "datacollectflag";
            this.datacollectflag.Size = new System.Drawing.Size(40, 16);
            this.datacollectflag.TabIndex = 14;
            this.datacollectflag.Text = "断开";
            // 
            // serverConnet
            // 
            this.serverConnet.AutoSize = true;
            this.serverConnet.Font = new System.Drawing.Font("宋体", 12F, System.Drawing.FontStyle.Regular, System.Drawing.GraphicsUnit.Point, ((byte)(134)));
            this.serverConnet.ForeColor = System.Drawing.Color.Red;
            this.serverConnet.Location = new System.Drawing.Point(339, 41);
            this.serverConnet.Name = "serverConnet";
            this.serverConnet.Size = new System.Drawing.Size(40, 16);
            this.serverConnet.TabIndex = 14;
            this.serverConnet.Text = "断开";
            // 
            // label57
            // 
            this.label57.AutoSize = true;
            this.label57.Font = new System.Drawing.Font("宋体", 12F, System.Drawing.FontStyle.Bold, System.Drawing.GraphicsUnit.Point, ((byte)(134)));
            this.label57.Location = new System.Drawing.Point(339, 17);
            this.label57.Name = "label57";
            this.label57.Size = new System.Drawing.Size(42, 16);
            this.label57.TabIndex = 14;
            this.label57.Text = "状态";
            // 
            // label58
            // 
            this.label58.AutoSize = true;
            this.label58.Font = new System.Drawing.Font("宋体", 12F, System.Drawing.FontStyle.Bold, System.Drawing.GraphicsUnit.Point, ((byte)(134)));
            this.label58.ForeColor = System.Drawing.Color.Black;
            this.label58.Location = new System.Drawing.Point(7, 104);
            this.label58.Name = "label58";
            this.label58.Size = new System.Drawing.Size(102, 16);
            this.label58.TabIndex = 12;
            this.label58.Text = "故障服务器:";
            // 
            // label59
            // 
            this.label59.AutoSize = true;
            this.label59.Font = new System.Drawing.Font("宋体", 12F, System.Drawing.FontStyle.Bold, System.Drawing.GraphicsUnit.Point, ((byte)(134)));
            this.label59.ForeColor = System.Drawing.Color.Black;
            this.label59.Location = new System.Drawing.Point(7, 40);
            this.label59.Name = "label59";
            this.label59.Size = new System.Drawing.Size(102, 16);
            this.label59.TabIndex = 12;
            this.label59.Text = "数据服务器:";
            // 
            // checkBox1
            // 
            this.checkBox1.AutoSize = true;
            this.checkBox1.ForeColor = System.Drawing.Color.Black;
            this.checkBox1.Location = new System.Drawing.Point(568, 269);
            this.checkBox1.Name = "checkBox1";
            this.checkBox1.Size = new System.Drawing.Size(68, 23);
            this.checkBox1.TabIndex = 11;
            this.checkBox1.Text = "打开";
            this.checkBox1.UseVisualStyleBackColor = true;
            // 
            // checkBox2
            // 
            this.checkBox2.AutoSize = true;
            this.checkBox2.ForeColor = System.Drawing.Color.Black;
            this.checkBox2.Location = new System.Drawing.Point(568, 224);
            this.checkBox2.Name = "checkBox2";
            this.checkBox2.Size = new System.Drawing.Size(68, 23);
            this.checkBox2.TabIndex = 11;
            this.checkBox2.Text = "打开";
            this.checkBox2.UseVisualStyleBackColor = true;
            // 
            // faultPort
            // 
            this.faultPort.BackColor = System.Drawing.SystemColors.Control;
            this.faultPort.BorderStyle = System.Windows.Forms.BorderStyle.None;
            this.faultPort.Font = new System.Drawing.Font("Times New Roman", 12F);
            this.faultPort.ForeColor = System.Drawing.Color.Black;
            this.faultPort.Location = new System.Drawing.Point(262, 106);
            this.faultPort.Name = "faultPort";
            this.faultPort.Size = new System.Drawing.Size(62, 19);
            this.faultPort.TabIndex = 8;
            this.faultPort.Text = "10000";
            this.faultPort.TextAlign = System.Windows.Forms.HorizontalAlignment.Center;
            // 
            // serverPort
            // 
            this.serverPort.BackColor = System.Drawing.SystemColors.Control;
            this.serverPort.BorderStyle = System.Windows.Forms.BorderStyle.None;
            this.serverPort.Font = new System.Drawing.Font("Times New Roman", 12F);
            this.serverPort.ForeColor = System.Drawing.Color.Black;
            this.serverPort.Location = new System.Drawing.Point(262, 40);
            this.serverPort.Name = "serverPort";
            this.serverPort.Size = new System.Drawing.Size(62, 19);
            this.serverPort.TabIndex = 8;
            this.serverPort.Text = "30011";
            this.serverPort.TextAlign = System.Windows.Forms.HorizontalAlignment.Center;
            // 
            // faultIP
            // 
            this.faultIP.BackColor = System.Drawing.SystemColors.Control;
            this.faultIP.BorderStyle = System.Windows.Forms.BorderStyle.None;
            this.faultIP.Font = new System.Drawing.Font("Times New Roman", 12F);
            this.faultIP.ForeColor = System.Drawing.Color.Black;
            this.faultIP.Location = new System.Drawing.Point(112, 105);
            this.faultIP.Name = "faultIP";
            this.faultIP.Size = new System.Drawing.Size(136, 19);
            this.faultIP.TabIndex = 8;
            this.faultIP.Text = "200.1.1.43";
            this.faultIP.TextAlign = System.Windows.Forms.HorizontalAlignment.Center;
            // 
            // serverIP
            // 
            this.serverIP.BackColor = System.Drawing.SystemColors.Control;
            this.serverIP.BorderStyle = System.Windows.Forms.BorderStyle.None;
            this.serverIP.Font = new System.Drawing.Font("Times New Roman", 12F);
            this.serverIP.ForeColor = System.Drawing.Color.Black;
            this.serverIP.Location = new System.Drawing.Point(112, 39);
            this.serverIP.Name = "serverIP";
            this.serverIP.Size = new System.Drawing.Size(136, 19);
            this.serverIP.TabIndex = 8;
            this.serverIP.Text = "200.1.1.52";
            this.serverIP.TextAlign = System.Windows.Forms.HorizontalAlignment.Center;
            // 
            // groupBox20
            // 
            this.groupBox20.Controls.Add(this.button7);
            this.groupBox20.Controls.Add(this.label60);
            this.groupBox20.Controls.Add(this.comboBox1);
            this.groupBox20.Dock = System.Windows.Forms.DockStyle.Top;
            this.groupBox20.Font = new System.Drawing.Font("宋体", 14.25F, System.Drawing.FontStyle.Bold, System.Drawing.GraphicsUnit.Point, ((byte)(134)));
            this.groupBox20.ForeColor = System.Drawing.Color.FromArgb(((int)(((byte)(0)))), ((int)(((byte)(0)))), ((int)(((byte)(192)))));
            this.groupBox20.Location = new System.Drawing.Point(3, 25);
            this.groupBox20.Name = "groupBox20";
            this.groupBox20.Size = new System.Drawing.Size(483, 60);
            this.groupBox20.TabIndex = 6;
            this.groupBox20.TabStop = false;
            this.groupBox20.Text = "命令";
            // 
            // button7
            // 
            this.button7.Anchor = System.Windows.Forms.AnchorStyles.None;
            this.button7.FlatStyle = System.Windows.Forms.FlatStyle.Flat;
            this.button7.Font = new System.Drawing.Font("宋体", 12F, System.Drawing.FontStyle.Regular, System.Drawing.GraphicsUnit.Point, ((byte)(134)));
            this.button7.ForeColor = System.Drawing.Color.FromArgb(((int)(((byte)(0)))), ((int)(((byte)(192)))), ((int)(((byte)(192)))));
            this.button7.Location = new System.Drawing.Point(398, 23);
            this.button7.Name = "button7";
            this.button7.Size = new System.Drawing.Size(62, 25);
            this.button7.TabIndex = 17;
            this.button7.Text = "执行";
            this.button7.UseVisualStyleBackColor = true;
            this.button7.Click += new System.EventHandler(this.button7_Click_2);
            // 
            // label60
            // 
            this.label60.AutoSize = true;
            this.label60.ForeColor = System.Drawing.Color.Black;
            this.label60.Location = new System.Drawing.Point(44, 31);
            this.label60.Name = "label60";
            this.label60.Size = new System.Drawing.Size(0, 19);
            this.label60.TabIndex = 14;
            // 
            // comboBox1
            // 
            this.comboBox1.Anchor = System.Windows.Forms.AnchorStyles.None;
            this.comboBox1.BackColor = System.Drawing.SystemColors.Control;
            this.comboBox1.DropDownStyle = System.Windows.Forms.ComboBoxStyle.DropDownList;
            this.comboBox1.FlatStyle = System.Windows.Forms.FlatStyle.Flat;
            this.comboBox1.FormattingEnabled = true;
            this.comboBox1.Items.AddRange(new object[] {
            "校准时钟",
            "设置IP与端口",
            "电压电流报警阈值",
            "设置数据发送时间间隔"});
            this.comboBox1.Location = new System.Drawing.Point(24, 22);
            this.comboBox1.Name = "comboBox1";
            this.comboBox1.Size = new System.Drawing.Size(368, 27);
            this.comboBox1.TabIndex = 15;
            // 
            // panel6
            // 
            this.panel6.Controls.Add(this.panelRight);
            this.panel6.Dock = System.Windows.Forms.DockStyle.Fill;
            this.panel6.Location = new System.Drawing.Point(506, 3);
            this.panel6.Name = "panel6";
            this.tableLayoutPanel2.SetRowSpan(this.panel6, 3);
            this.panel6.Size = new System.Drawing.Size(652, 533);
            this.panel6.TabIndex = 10;
            // 
            // panelRight
            // 
            this.panelRight.Controls.Add(this.groupBox21);
            this.panelRight.Controls.Add(this.groupBox23);
            this.panelRight.Dock = System.Windows.Forms.DockStyle.Fill;
            this.panelRight.Font = new System.Drawing.Font("宋体", 14.25F, System.Drawing.FontStyle.Bold, System.Drawing.GraphicsUnit.Point, ((byte)(134)));
            this.panelRight.ForeColor = System.Drawing.Color.Maroon;
            this.panelRight.Location = new System.Drawing.Point(0, 0);
            this.panelRight.Name = "panelRight";
            this.panelRight.Size = new System.Drawing.Size(652, 533);
            this.panelRight.TabIndex = 6;
            this.panelRight.TabStop = false;
            this.panelRight.Text = "水下控制舱";
            // 
            // groupBox21
            // 
            this.groupBox21.Controls.Add(this.groupBox22);
            this.groupBox21.Controls.Add(this.sensorFiveSendNum);
            this.groupBox21.Controls.Add(this.sensorFourSendNum);
            this.groupBox21.Controls.Add(this.sensorThreeSendNum);
            this.groupBox21.Controls.Add(this.sensorTwoSendNum);
            this.groupBox21.Controls.Add(this.label65);
            this.groupBox21.Controls.Add(this.label66);
            this.groupBox21.Controls.Add(this.label67);
            this.groupBox21.Controls.Add(this.label68);
            this.groupBox21.Controls.Add(this.sensorOneSendNum);
            this.groupBox21.Controls.Add(this.label69);
            this.groupBox21.Controls.Add(this.label70);
            this.groupBox21.Controls.Add(this.label71);
            this.groupBox21.Controls.Add(this.label72);
            this.groupBox21.Controls.Add(this.label73);
            this.groupBox21.Controls.Add(this.canSendNum);
            this.groupBox21.Controls.Add(this.canReceiveNum);
            this.groupBox21.Controls.Add(this.txtCollectErrorTime);
            this.groupBox21.Controls.Add(this.dataCollect1StartTime);
            this.groupBox21.Controls.Add(this.canTemp);
            this.groupBox21.Controls.Add(this.label74);
            this.groupBox21.Dock = System.Windows.Forms.DockStyle.Bottom;
            this.groupBox21.ForeColor = System.Drawing.Color.FromArgb(((int)(((byte)(0)))), ((int)(((byte)(0)))), ((int)(((byte)(192)))));
            this.groupBox21.Location = new System.Drawing.Point(3, 207);
            this.groupBox21.Name = "groupBox21";
            this.groupBox21.Size = new System.Drawing.Size(646, 323);
            this.groupBox21.TabIndex = 6;
            this.groupBox21.TabStop = false;
            this.groupBox21.Text = "舱内状态";
            // 
            // groupBox22
            // 
            this.groupBox22.Controls.Add(this.label51);
            this.groupBox22.Controls.Add(this.label52);
            this.groupBox22.Controls.Add(this.label62);
            this.groupBox22.Controls.Add(this.label63);
            this.groupBox22.Controls.Add(this.label64);
            this.groupBox22.Controls.Add(this.chFiveClose);
            this.groupBox22.Controls.Add(this.chFiveOpen);
            this.groupBox22.Controls.Add(this.chFourClose);
            this.groupBox22.Controls.Add(this.chFourOpen);
            this.groupBox22.Controls.Add(this.chThreeClose);
            this.groupBox22.Controls.Add(this.chThreeOpen);
            this.groupBox22.Controls.Add(this.chTwoClose);
            this.groupBox22.Controls.Add(this.chTwoOpen);
            this.groupBox22.Controls.Add(this.chOneOpen);
            this.groupBox22.Controls.Add(this.chOneClose);
            this.groupBox22.ForeColor = System.Drawing.Color.FromArgb(((int)(((byte)(0)))), ((int)(((byte)(0)))), ((int)(((byte)(192)))));
            this.groupBox22.Location = new System.Drawing.Point(328, 104);
            this.groupBox22.Name = "groupBox22";
            this.groupBox22.RightToLeft = System.Windows.Forms.RightToLeft.No;
            this.groupBox22.Size = new System.Drawing.Size(316, 231);
            this.groupBox22.TabIndex = 19;
            this.groupBox22.TabStop = false;
            this.groupBox22.Text = "通道开关指令";
            // 
            // label51
            // 
            this.label51.AutoSize = true;
            this.label51.Font = new System.Drawing.Font("Times New Roman", 12F, System.Drawing.FontStyle.Bold, System.Drawing.GraphicsUnit.Point, ((byte)(0)));
            this.label51.ForeColor = System.Drawing.Color.Black;
            this.label51.Location = new System.Drawing.Point(26, 189);
            this.label51.Name = "label51";
            this.label51.Size = new System.Drawing.Size(68, 19);
            this.label51.TabIndex = 30;
            this.label51.Text = "通道5：";
            // 
            // label52
            // 
            this.label52.AutoSize = true;
            this.label52.Font = new System.Drawing.Font("Times New Roman", 12F, System.Drawing.FontStyle.Bold, System.Drawing.GraphicsUnit.Point, ((byte)(0)));
            this.label52.ForeColor = System.Drawing.Color.Black;
            this.label52.Location = new System.Drawing.Point(26, 152);
            this.label52.Name = "label52";
            this.label52.Size = new System.Drawing.Size(68, 19);
            this.label52.TabIndex = 29;
            this.label52.Text = "通道4：";
            // 
            // label62
            // 
            this.label62.AutoSize = true;
            this.label62.Font = new System.Drawing.Font("Times New Roman", 12F, System.Drawing.FontStyle.Bold, System.Drawing.GraphicsUnit.Point, ((byte)(0)));
            this.label62.ForeColor = System.Drawing.Color.Black;
            this.label62.Location = new System.Drawing.Point(26, 115);
            this.label62.Name = "label62";
            this.label62.Size = new System.Drawing.Size(68, 19);
            this.label62.TabIndex = 28;
            this.label62.Text = "通道3：";
            // 
            // label63
            // 
            this.label63.AutoSize = true;
            this.label63.Font = new System.Drawing.Font("Times New Roman", 12F, System.Drawing.FontStyle.Bold, System.Drawing.GraphicsUnit.Point, ((byte)(0)));
            this.label63.ForeColor = System.Drawing.Color.Black;
            this.label63.Location = new System.Drawing.Point(26, 78);
            this.label63.Name = "label63";
            this.label63.Size = new System.Drawing.Size(68, 19);
            this.label63.TabIndex = 27;
            this.label63.Text = "通道2：";
            // 
            // label64
            // 
            this.label64.AutoSize = true;
            this.label64.Font = new System.Drawing.Font("Times New Roman", 12F, System.Drawing.FontStyle.Bold, System.Drawing.GraphicsUnit.Point, ((byte)(0)));
            this.label64.ForeColor = System.Drawing.Color.Black;
            this.label64.Location = new System.Drawing.Point(26, 41);
            this.label64.Name = "label64";
            this.label64.Size = new System.Drawing.Size(68, 19);
            this.label64.TabIndex = 20;
            this.label64.Text = "通道1：";
            // 
            // chFiveClose
            // 
            this.chFiveClose.BackColor = System.Drawing.SystemColors.Control;
            this.chFiveClose.Enabled = false;
            this.chFiveClose.FlatStyle = System.Windows.Forms.FlatStyle.Popup;
            this.chFiveClose.Font = new System.Drawing.Font("楷体", 12F, System.Drawing.FontStyle.Regular, System.Drawing.GraphicsUnit.Point, ((byte)(134)));
            this.chFiveClose.ForeColor = System.Drawing.Color.Red;
            this.chFiveClose.Location = new System.Drawing.Point(221, 187);
            this.chFiveClose.Name = "chFiveClose";
            this.chFiveClose.Size = new System.Drawing.Size(75, 25);
            this.chFiveClose.TabIndex = 26;
            this.chFiveClose.Text = "关闭";
            this.chFiveClose.UseVisualStyleBackColor = false;
            this.chFiveClose.Click += new System.EventHandler(this.chFiveClose_Click);
            // 
            // chFiveOpen
            // 
            this.chFiveOpen.BackColor = System.Drawing.SystemColors.Control;
            this.chFiveOpen.FlatStyle = System.Windows.Forms.FlatStyle.Popup;
            this.chFiveOpen.Font = new System.Drawing.Font("楷体", 12F, System.Drawing.FontStyle.Regular, System.Drawing.GraphicsUnit.Point, ((byte)(134)));
            this.chFiveOpen.ForeColor = System.Drawing.Color.FromArgb(((int)(((byte)(0)))), ((int)(((byte)(192)))), ((int)(((byte)(192)))));
            this.chFiveOpen.Location = new System.Drawing.Point(115, 187);
            this.chFiveOpen.Name = "chFiveOpen";
            this.chFiveOpen.Size = new System.Drawing.Size(75, 25);
            this.chFiveOpen.TabIndex = 25;
            this.chFiveOpen.Text = "打开";
            this.chFiveOpen.UseVisualStyleBackColor = false;
            this.chFiveOpen.Click += new System.EventHandler(this.chFiveOpen_Click);
            // 
            // chFourClose
            // 
            this.chFourClose.BackColor = System.Drawing.SystemColors.Control;
            this.chFourClose.Enabled = false;
            this.chFourClose.FlatStyle = System.Windows.Forms.FlatStyle.Popup;
            this.chFourClose.Font = new System.Drawing.Font("楷体", 12F, System.Drawing.FontStyle.Regular, System.Drawing.GraphicsUnit.Point, ((byte)(134)));
            this.chFourClose.ForeColor = System.Drawing.Color.Red;
            this.chFourClose.Location = new System.Drawing.Point(221, 149);
            this.chFourClose.Name = "chFourClose";
            this.chFourClose.Size = new System.Drawing.Size(75, 25);
            this.chFourClose.TabIndex = 24;
            this.chFourClose.Text = "关闭";
            this.chFourClose.UseVisualStyleBackColor = false;
            this.chFourClose.Click += new System.EventHandler(this.chFourClose_Click_1);
            // 
            // chFourOpen
            // 
            this.chFourOpen.BackColor = System.Drawing.SystemColors.Control;
            this.chFourOpen.FlatStyle = System.Windows.Forms.FlatStyle.Popup;
            this.chFourOpen.Font = new System.Drawing.Font("楷体", 12F, System.Drawing.FontStyle.Regular, System.Drawing.GraphicsUnit.Point, ((byte)(134)));
            this.chFourOpen.ForeColor = System.Drawing.Color.FromArgb(((int)(((byte)(0)))), ((int)(((byte)(192)))), ((int)(((byte)(192)))));
            this.chFourOpen.Location = new System.Drawing.Point(115, 149);
            this.chFourOpen.Name = "chFourOpen";
            this.chFourOpen.Size = new System.Drawing.Size(75, 25);
            this.chFourOpen.TabIndex = 23;
            this.chFourOpen.Text = "打开";
            this.chFourOpen.UseVisualStyleBackColor = false;
            this.chFourOpen.Click += new System.EventHandler(this.chFourOpen_Click_1);
            // 
            // chThreeClose
            // 
            this.chThreeClose.BackColor = System.Drawing.SystemColors.Control;
            this.chThreeClose.Enabled = false;
            this.chThreeClose.FlatStyle = System.Windows.Forms.FlatStyle.Popup;
            this.chThreeClose.Font = new System.Drawing.Font("楷体", 12F, System.Drawing.FontStyle.Regular, System.Drawing.GraphicsUnit.Point, ((byte)(134)));
            this.chThreeClose.ForeColor = System.Drawing.Color.Red;
            this.chThreeClose.Location = new System.Drawing.Point(221, 111);
            this.chThreeClose.Name = "chThreeClose";
            this.chThreeClose.Size = new System.Drawing.Size(75, 25);
            this.chThreeClose.TabIndex = 22;
            this.chThreeClose.Text = "关闭";
            this.chThreeClose.UseVisualStyleBackColor = false;
            this.chThreeClose.Click += new System.EventHandler(this.chThreeClose_Click_1);
            // 
            // chThreeOpen
            // 
            this.chThreeOpen.BackColor = System.Drawing.SystemColors.Control;
            this.chThreeOpen.FlatStyle = System.Windows.Forms.FlatStyle.Popup;
            this.chThreeOpen.Font = new System.Drawing.Font("楷体", 12F, System.Drawing.FontStyle.Regular, System.Drawing.GraphicsUnit.Point, ((byte)(134)));
            this.chThreeOpen.ForeColor = System.Drawing.Color.FromArgb(((int)(((byte)(0)))), ((int)(((byte)(192)))), ((int)(((byte)(192)))));
            this.chThreeOpen.Location = new System.Drawing.Point(115, 111);
            this.chThreeOpen.Name = "chThreeOpen";
            this.chThreeOpen.Size = new System.Drawing.Size(75, 25);
            this.chThreeOpen.TabIndex = 21;
            this.chThreeOpen.Text = "打开";
            this.chThreeOpen.UseVisualStyleBackColor = false;
            this.chThreeOpen.Click += new System.EventHandler(this.chThreeOpen_Click_1);
            // 
            // chTwoClose
            // 
            this.chTwoClose.BackColor = System.Drawing.SystemColors.Control;
            this.chTwoClose.Enabled = false;
            this.chTwoClose.FlatStyle = System.Windows.Forms.FlatStyle.Popup;
            this.chTwoClose.Font = new System.Drawing.Font("楷体", 12F, System.Drawing.FontStyle.Regular, System.Drawing.GraphicsUnit.Point, ((byte)(134)));
            this.chTwoClose.ForeColor = System.Drawing.Color.Red;
            this.chTwoClose.Location = new System.Drawing.Point(221, 73);
            this.chTwoClose.Name = "chTwoClose";
            this.chTwoClose.Size = new System.Drawing.Size(75, 25);
            this.chTwoClose.TabIndex = 20;
            this.chTwoClose.Text = "关闭";
            this.chTwoClose.UseVisualStyleBackColor = false;
            this.chTwoClose.Click += new System.EventHandler(this.chTwoClose_Click_1);
            // 
            // chTwoOpen
            // 
            this.chTwoOpen.BackColor = System.Drawing.SystemColors.Control;
            this.chTwoOpen.FlatStyle = System.Windows.Forms.FlatStyle.Popup;
            this.chTwoOpen.Font = new System.Drawing.Font("楷体", 12F, System.Drawing.FontStyle.Regular, System.Drawing.GraphicsUnit.Point, ((byte)(134)));
            this.chTwoOpen.ForeColor = System.Drawing.Color.FromArgb(((int)(((byte)(0)))), ((int)(((byte)(192)))), ((int)(((byte)(192)))));
            this.chTwoOpen.Location = new System.Drawing.Point(115, 73);
            this.chTwoOpen.Name = "chTwoOpen";
            this.chTwoOpen.Size = new System.Drawing.Size(75, 25);
            this.chTwoOpen.TabIndex = 19;
            this.chTwoOpen.Text = "打开";
            this.chTwoOpen.UseVisualStyleBackColor = false;
            this.chTwoOpen.Click += new System.EventHandler(this.chTwoOpen_Click_1);
            // 
            // chOneOpen
            // 
            this.chOneOpen.BackColor = System.Drawing.SystemColors.Control;
            this.chOneOpen.FlatStyle = System.Windows.Forms.FlatStyle.Popup;
            this.chOneOpen.Font = new System.Drawing.Font("楷体", 12F, System.Drawing.FontStyle.Regular, System.Drawing.GraphicsUnit.Point, ((byte)(134)));
            this.chOneOpen.ForeColor = System.Drawing.Color.FromArgb(((int)(((byte)(0)))), ((int)(((byte)(192)))), ((int)(((byte)(192)))));
            this.chOneOpen.Location = new System.Drawing.Point(115, 35);
            this.chOneOpen.Name = "chOneOpen";
            this.chOneOpen.Size = new System.Drawing.Size(75, 25);
            this.chOneOpen.TabIndex = 17;
            this.chOneOpen.Text = "打开";
            this.chOneOpen.UseVisualStyleBackColor = false;
            this.chOneOpen.Click += new System.EventHandler(this.chOneOpen_Click_1);
            // 
            // chOneClose
            // 
            this.chOneClose.BackColor = System.Drawing.SystemColors.Control;
            this.chOneClose.Enabled = false;
            this.chOneClose.FlatStyle = System.Windows.Forms.FlatStyle.Popup;
            this.chOneClose.Font = new System.Drawing.Font("楷体", 12F, System.Drawing.FontStyle.Regular, System.Drawing.GraphicsUnit.Point, ((byte)(134)));
            this.chOneClose.ForeColor = System.Drawing.Color.Red;
            this.chOneClose.Location = new System.Drawing.Point(221, 35);
            this.chOneClose.Name = "chOneClose";
            this.chOneClose.Size = new System.Drawing.Size(75, 25);
            this.chOneClose.TabIndex = 18;
            this.chOneClose.Text = "关闭";
            this.chOneClose.UseVisualStyleBackColor = false;
            this.chOneClose.Click += new System.EventHandler(this.chOneClose_Click_1);
            // 
            // sensorFiveSendNum
            // 
            this.sensorFiveSendNum.BackColor = System.Drawing.SystemColors.Control;
            this.sensorFiveSendNum.BorderStyle = System.Windows.Forms.BorderStyle.None;
            this.sensorFiveSendNum.Font = new System.Drawing.Font("Times New Roman", 12F);
            this.sensorFiveSendNum.ForeColor = System.Drawing.Color.Black;
            this.sensorFiveSendNum.Location = new System.Drawing.Point(147, 294);
            this.sensorFiveSendNum.Name = "sensorFiveSendNum";
            this.sensorFiveSendNum.Size = new System.Drawing.Size(150, 19);
            this.sensorFiveSendNum.TabIndex = 16;
            this.sensorFiveSendNum.TextAlign = System.Windows.Forms.HorizontalAlignment.Center;
            // 
            // sensorFourSendNum
            // 
            this.sensorFourSendNum.BackColor = System.Drawing.SystemColors.Control;
            this.sensorFourSendNum.BorderStyle = System.Windows.Forms.BorderStyle.None;
            this.sensorFourSendNum.Font = new System.Drawing.Font("Times New Roman", 12F);
            this.sensorFourSendNum.ForeColor = System.Drawing.Color.Black;
            this.sensorFourSendNum.Location = new System.Drawing.Point(147, 256);
            this.sensorFourSendNum.Name = "sensorFourSendNum";
            this.sensorFourSendNum.Size = new System.Drawing.Size(150, 19);
            this.sensorFourSendNum.TabIndex = 16;
            this.sensorFourSendNum.TextAlign = System.Windows.Forms.HorizontalAlignment.Center;
            // 
            // sensorThreeSendNum
            // 
            this.sensorThreeSendNum.BackColor = System.Drawing.SystemColors.Control;
            this.sensorThreeSendNum.BorderStyle = System.Windows.Forms.BorderStyle.None;
            this.sensorThreeSendNum.Font = new System.Drawing.Font("Times New Roman", 12F);
            this.sensorThreeSendNum.ForeColor = System.Drawing.Color.Black;
            this.sensorThreeSendNum.Location = new System.Drawing.Point(147, 220);
            this.sensorThreeSendNum.Name = "sensorThreeSendNum";
            this.sensorThreeSendNum.Size = new System.Drawing.Size(150, 19);
            this.sensorThreeSendNum.TabIndex = 16;
            this.sensorThreeSendNum.TextAlign = System.Windows.Forms.HorizontalAlignment.Center;
            // 
            // sensorTwoSendNum
            // 
            this.sensorTwoSendNum.BackColor = System.Drawing.SystemColors.Control;
            this.sensorTwoSendNum.BorderStyle = System.Windows.Forms.BorderStyle.None;
            this.sensorTwoSendNum.Font = new System.Drawing.Font("Times New Roman", 12F);
            this.sensorTwoSendNum.ForeColor = System.Drawing.Color.Black;
            this.sensorTwoSendNum.Location = new System.Drawing.Point(147, 183);
            this.sensorTwoSendNum.Name = "sensorTwoSendNum";
            this.sensorTwoSendNum.Size = new System.Drawing.Size(150, 19);
            this.sensorTwoSendNum.TabIndex = 16;
            this.sensorTwoSendNum.TextAlign = System.Windows.Forms.HorizontalAlignment.Center;
            // 
            // label65
            // 
            this.label65.AutoSize = true;
            this.label65.Font = new System.Drawing.Font("Times New Roman", 12F, System.Drawing.FontStyle.Bold, System.Drawing.GraphicsUnit.Point, ((byte)(0)));
            this.label65.ForeColor = System.Drawing.Color.Black;
            this.label65.Location = new System.Drawing.Point(5, 294);
            this.label65.Name = "label65";
            this.label65.Size = new System.Drawing.Size(136, 19);
            this.label65.TabIndex = 15;
            this.label65.Text = "通道5接收数据包";
            // 
            // label66
            // 
            this.label66.AutoSize = true;
            this.label66.Font = new System.Drawing.Font("Times New Roman", 12F, System.Drawing.FontStyle.Bold, System.Drawing.GraphicsUnit.Point, ((byte)(0)));
            this.label66.ForeColor = System.Drawing.Color.Black;
            this.label66.Location = new System.Drawing.Point(5, 256);
            this.label66.Name = "label66";
            this.label66.Size = new System.Drawing.Size(136, 19);
            this.label66.TabIndex = 15;
            this.label66.Text = "通道4接收数据包";
            // 
            // label67
            // 
            this.label67.AutoSize = true;
            this.label67.Font = new System.Drawing.Font("Times New Roman", 12F, System.Drawing.FontStyle.Bold, System.Drawing.GraphicsUnit.Point, ((byte)(0)));
            this.label67.ForeColor = System.Drawing.Color.Black;
            this.label67.Location = new System.Drawing.Point(5, 220);
            this.label67.Name = "label67";
            this.label67.Size = new System.Drawing.Size(136, 19);
            this.label67.TabIndex = 15;
            this.label67.Text = "通道3接收数据包";
            // 
            // label68
            // 
            this.label68.AutoSize = true;
            this.label68.Font = new System.Drawing.Font("Times New Roman", 12F, System.Drawing.FontStyle.Bold, System.Drawing.GraphicsUnit.Point, ((byte)(0)));
            this.label68.ForeColor = System.Drawing.Color.Black;
            this.label68.Location = new System.Drawing.Point(5, 183);
            this.label68.Name = "label68";
            this.label68.Size = new System.Drawing.Size(136, 19);
            this.label68.TabIndex = 15;
            this.label68.Text = "通道2接收数据包";
            // 
            // sensorOneSendNum
            // 
            this.sensorOneSendNum.BackColor = System.Drawing.SystemColors.Control;
            this.sensorOneSendNum.BorderStyle = System.Windows.Forms.BorderStyle.None;
            this.sensorOneSendNum.Font = new System.Drawing.Font("Times New Roman", 12F);
            this.sensorOneSendNum.ForeColor = System.Drawing.Color.Black;
            this.sensorOneSendNum.Location = new System.Drawing.Point(147, 147);
            this.sensorOneSendNum.Name = "sensorOneSendNum";
            this.sensorOneSendNum.Size = new System.Drawing.Size(150, 19);
            this.sensorOneSendNum.TabIndex = 16;
            this.sensorOneSendNum.TextAlign = System.Windows.Forms.HorizontalAlignment.Center;
            // 
            // label69
            // 
            this.label69.AutoSize = true;
            this.label69.Font = new System.Drawing.Font("Times New Roman", 12F, System.Drawing.FontStyle.Bold, System.Drawing.GraphicsUnit.Point, ((byte)(0)));
            this.label69.ForeColor = System.Drawing.Color.Black;
            this.label69.Location = new System.Drawing.Point(5, 146);
            this.label69.Name = "label69";
            this.label69.Size = new System.Drawing.Size(136, 19);
            this.label69.TabIndex = 15;
            this.label69.Text = "通道1接收数据包";
            // 
            // label70
            // 
            this.label70.AutoSize = true;
            this.label70.Font = new System.Drawing.Font("宋体", 12F, System.Drawing.FontStyle.Bold, System.Drawing.GraphicsUnit.Point, ((byte)(134)));
            this.label70.ForeColor = System.Drawing.Color.Black;
            this.label70.Location = new System.Drawing.Point(350, 71);
            this.label70.Name = "label70";
            this.label70.Size = new System.Drawing.Size(93, 16);
            this.label70.TabIndex = 14;
            this.label70.Text = "发送数据包";
            // 
            // label71
            // 
            this.label71.AutoSize = true;
            this.label71.Font = new System.Drawing.Font("宋体", 12F, System.Drawing.FontStyle.Bold, System.Drawing.GraphicsUnit.Point, ((byte)(134)));
            this.label71.ForeColor = System.Drawing.Color.Black;
            this.label71.Location = new System.Drawing.Point(350, 36);
            this.label71.Name = "label71";
            this.label71.Size = new System.Drawing.Size(93, 16);
            this.label71.TabIndex = 14;
            this.label71.Text = "接收数据包";
            // 
            // label72
            // 
            this.label72.AutoSize = true;
            this.label72.Font = new System.Drawing.Font("宋体", 12F, System.Drawing.FontStyle.Bold, System.Drawing.GraphicsUnit.Point, ((byte)(134)));
            this.label72.ForeColor = System.Drawing.Color.Black;
            this.label72.Location = new System.Drawing.Point(5, 71);
            this.label72.Name = "label72";
            this.label72.Size = new System.Drawing.Size(110, 16);
            this.label72.TabIndex = 14;
            this.label72.Text = "故障发生时间";
            // 
            // label73
            // 
            this.label73.AutoSize = true;
            this.label73.Font = new System.Drawing.Font("宋体", 12F, System.Drawing.FontStyle.Bold, System.Drawing.GraphicsUnit.Point, ((byte)(134)));
            this.label73.ForeColor = System.Drawing.Color.Black;
            this.label73.Location = new System.Drawing.Point(5, 36);
            this.label73.Name = "label73";
            this.label73.Size = new System.Drawing.Size(110, 16);
            this.label73.TabIndex = 14;
            this.label73.Text = "开始采样时间";
            // 
            // canSendNum
            // 
            this.canSendNum.BackColor = System.Drawing.SystemColors.Control;
            this.canSendNum.BorderStyle = System.Windows.Forms.BorderStyle.None;
            this.canSendNum.Font = new System.Drawing.Font("Times New Roman", 12F);
            this.canSendNum.ForeColor = System.Drawing.Color.Black;
            this.canSendNum.Location = new System.Drawing.Point(474, 71);
            this.canSendNum.Name = "canSendNum";
            this.canSendNum.Size = new System.Drawing.Size(140, 19);
            this.canSendNum.TabIndex = 13;
            this.canSendNum.TextAlign = System.Windows.Forms.HorizontalAlignment.Center;
            // 
            // canReceiveNum
            // 
            this.canReceiveNum.BackColor = System.Drawing.SystemColors.Control;
            this.canReceiveNum.BorderStyle = System.Windows.Forms.BorderStyle.None;
            this.canReceiveNum.Font = new System.Drawing.Font("Times New Roman", 12F);
            this.canReceiveNum.ForeColor = System.Drawing.Color.Black;
            this.canReceiveNum.Location = new System.Drawing.Point(474, 36);
            this.canReceiveNum.Name = "canReceiveNum";
            this.canReceiveNum.Size = new System.Drawing.Size(140, 19);
            this.canReceiveNum.TabIndex = 13;
            this.canReceiveNum.TextAlign = System.Windows.Forms.HorizontalAlignment.Center;
            // 
            // txtCollectErrorTime
            // 
            this.txtCollectErrorTime.BackColor = System.Drawing.SystemColors.Control;
            this.txtCollectErrorTime.BorderStyle = System.Windows.Forms.BorderStyle.None;
            this.txtCollectErrorTime.Font = new System.Drawing.Font("Times New Roman", 12F);
            this.txtCollectErrorTime.ForeColor = System.Drawing.Color.Black;
            this.txtCollectErrorTime.Location = new System.Drawing.Point(147, 71);
            this.txtCollectErrorTime.Name = "txtCollectErrorTime";
            this.txtCollectErrorTime.Size = new System.Drawing.Size(150, 19);
            this.txtCollectErrorTime.TabIndex = 13;
            this.txtCollectErrorTime.TextAlign = System.Windows.Forms.HorizontalAlignment.Center;
            // 
            // dataCollect1StartTime
            // 
            this.dataCollect1StartTime.BackColor = System.Drawing.SystemColors.Control;
            this.dataCollect1StartTime.BorderStyle = System.Windows.Forms.BorderStyle.None;
            this.dataCollect1StartTime.Font = new System.Drawing.Font("Times New Roman", 12F);
            this.dataCollect1StartTime.ForeColor = System.Drawing.Color.Black;
            this.dataCollect1StartTime.Location = new System.Drawing.Point(147, 36);
            this.dataCollect1StartTime.Name = "dataCollect1StartTime";
            this.dataCollect1StartTime.Size = new System.Drawing.Size(150, 19);
            this.dataCollect1StartTime.TabIndex = 13;
            this.dataCollect1StartTime.TextAlign = System.Windows.Forms.HorizontalAlignment.Center;
            // 
            // canTemp
            // 
            this.canTemp.BackColor = System.Drawing.SystemColors.Control;
            this.canTemp.BorderStyle = System.Windows.Forms.BorderStyle.None;
            this.canTemp.Font = new System.Drawing.Font("Times New Roman", 12F);
            this.canTemp.ForeColor = System.Drawing.Color.Black;
            this.canTemp.Location = new System.Drawing.Point(147, 108);
            this.canTemp.Name = "canTemp";
            this.canTemp.Size = new System.Drawing.Size(150, 19);
            this.canTemp.TabIndex = 13;
            this.canTemp.TextAlign = System.Windows.Forms.HorizontalAlignment.Center;
            // 
            // label74
            // 
            this.label74.AutoSize = true;
            this.label74.Font = new System.Drawing.Font("Times New Roman", 12F, System.Drawing.FontStyle.Bold, System.Drawing.GraphicsUnit.Point, ((byte)(0)));
            this.label74.ForeColor = System.Drawing.Color.Black;
            this.label74.Location = new System.Drawing.Point(5, 109);
            this.label74.Name = "label74";
            this.label74.Size = new System.Drawing.Size(70, 19);
            this.label74.TabIndex = 12;
            this.label74.Text = "温度(℃)";
            // 
            // groupBox23
            // 
            this.groupBox23.Controls.Add(this.label75);
            this.groupBox23.Controls.Add(this.label77);
            this.groupBox23.Controls.Add(this.label78);
            this.groupBox23.Controls.Add(this.label79);
            this.groupBox23.Controls.Add(this.label80);
            this.groupBox23.Controls.Add(this.label81);
            this.groupBox23.Controls.Add(this.label82);
            this.groupBox23.Controls.Add(this.label83);
            this.groupBox23.Controls.Add(this.label84);
            this.groupBox23.Controls.Add(this.label85);
            this.groupBox23.Controls.Add(this.label86);
            this.groupBox23.Controls.Add(this.label87);
            this.groupBox23.Controls.Add(this.label88);
            this.groupBox23.Controls.Add(this.label89);
            this.groupBox23.Controls.Add(this.label90);
            this.groupBox23.Controls.Add(this.sensorFiveTime);
            this.groupBox23.Controls.Add(this.sensorFourTime);
            this.groupBox23.Controls.Add(this.sensorFiveStatus);
            this.groupBox23.Controls.Add(this.sensorThreeTime);
            this.groupBox23.Controls.Add(this.sensorFourStatus);
            this.groupBox23.Controls.Add(this.sensorTwoTime);
            this.groupBox23.Controls.Add(this.sensorThreeStatus);
            this.groupBox23.Controls.Add(this.sensorOneTime);
            this.groupBox23.Controls.Add(this.sensorTwoStatus);
            this.groupBox23.Controls.Add(this.sensorFivePower);
            this.groupBox23.Controls.Add(this.sensorThreePower);
            this.groupBox23.Controls.Add(this.sensorFourPower);
            this.groupBox23.Controls.Add(this.sensorTwoPower);
            this.groupBox23.Controls.Add(this.sensorOnePower);
            this.groupBox23.Controls.Add(this.sensorFiveCur);
            this.groupBox23.Controls.Add(this.sensorThreeCur);
            this.groupBox23.Controls.Add(this.sensorFourCur);
            this.groupBox23.Controls.Add(this.sensorOneStatus);
            this.groupBox23.Controls.Add(this.sensorTwoCur);
            this.groupBox23.Controls.Add(this.sensorOneCur);
            this.groupBox23.Controls.Add(this.sensorFiveVol);
            this.groupBox23.Controls.Add(this.sensorThreeVol);
            this.groupBox23.Controls.Add(this.label91);
            this.groupBox23.Controls.Add(this.sensorFourVol);
            this.groupBox23.Controls.Add(this.label92);
            this.groupBox23.Controls.Add(this.label93);
            this.groupBox23.Controls.Add(this.sensorTwoVol);
            this.groupBox23.Controls.Add(this.label94);
            this.groupBox23.Controls.Add(this.sensorOneVol);
            this.groupBox23.Controls.Add(this.label95);
            this.groupBox23.Dock = System.Windows.Forms.DockStyle.Top;
            this.groupBox23.Font = new System.Drawing.Font("宋体", 14.25F, System.Drawing.FontStyle.Bold, System.Drawing.GraphicsUnit.Point, ((byte)(134)));
            this.groupBox23.ForeColor = System.Drawing.Color.FromArgb(((int)(((byte)(0)))), ((int)(((byte)(0)))), ((int)(((byte)(192)))));
            this.groupBox23.Location = new System.Drawing.Point(3, 25);
            this.groupBox23.Name = "groupBox23";
            this.groupBox23.Size = new System.Drawing.Size(646, 182);
            this.groupBox23.TabIndex = 6;
            this.groupBox23.TabStop = false;
            this.groupBox23.Text = "电能输出通道信息";
            // 
            // label75
            // 
            this.label75.AutoSize = true;
            this.label75.Font = new System.Drawing.Font("Times New Roman", 12F, ((System.Drawing.FontStyle)((System.Drawing.FontStyle.Bold | System.Drawing.FontStyle.Italic))), System.Drawing.GraphicsUnit.Point, ((byte)(0)));
            this.label75.ForeColor = System.Drawing.Color.Black;
            this.label75.Location = new System.Drawing.Point(324, 153);
            this.label75.Name = "label75";
            this.label75.Size = new System.Drawing.Size(23, 19);
            this.label75.TabIndex = 33;
            this.label75.Text = "W";
            // 
            // label77
            // 
            this.label77.AutoSize = true;
            this.label77.Font = new System.Drawing.Font("Times New Roman", 12F, ((System.Drawing.FontStyle)((System.Drawing.FontStyle.Bold | System.Drawing.FontStyle.Italic))), System.Drawing.GraphicsUnit.Point, ((byte)(0)));
            this.label77.ForeColor = System.Drawing.Color.Black;
            this.label77.Location = new System.Drawing.Point(324, 122);
            this.label77.Name = "label77";
            this.label77.Size = new System.Drawing.Size(23, 19);
            this.label77.TabIndex = 32;
            this.label77.Text = "W";
            // 
            // label78
            // 
            this.label78.AutoSize = true;
            this.label78.Font = new System.Drawing.Font("Times New Roman", 12F, ((System.Drawing.FontStyle)((System.Drawing.FontStyle.Bold | System.Drawing.FontStyle.Italic))), System.Drawing.GraphicsUnit.Point, ((byte)(0)));
            this.label78.ForeColor = System.Drawing.Color.Black;
            this.label78.Location = new System.Drawing.Point(324, 91);
            this.label78.Name = "label78";
            this.label78.Size = new System.Drawing.Size(23, 19);
            this.label78.TabIndex = 31;
            this.label78.Text = "W";
            // 
            // label79
            // 
            this.label79.AutoSize = true;
            this.label79.Font = new System.Drawing.Font("Times New Roman", 12F, ((System.Drawing.FontStyle)((System.Drawing.FontStyle.Bold | System.Drawing.FontStyle.Italic))), System.Drawing.GraphicsUnit.Point, ((byte)(0)));
            this.label79.ForeColor = System.Drawing.Color.Black;
            this.label79.Location = new System.Drawing.Point(324, 60);
            this.label79.Name = "label79";
            this.label79.Size = new System.Drawing.Size(23, 19);
            this.label79.TabIndex = 30;
            this.label79.Text = "W";
            // 
            // label80
            // 
            this.label80.AutoSize = true;
            this.label80.Font = new System.Drawing.Font("Times New Roman", 12F, ((System.Drawing.FontStyle)((System.Drawing.FontStyle.Bold | System.Drawing.FontStyle.Italic))), System.Drawing.GraphicsUnit.Point, ((byte)(0)));
            this.label80.ForeColor = System.Drawing.Color.Black;
            this.label80.Location = new System.Drawing.Point(324, 29);
            this.label80.Name = "label80";
            this.label80.Size = new System.Drawing.Size(23, 19);
            this.label80.TabIndex = 29;
            this.label80.Text = "W";
            // 
            // label81
            // 
            this.label81.AutoSize = true;
            this.label81.Font = new System.Drawing.Font("Times New Roman", 12F, ((System.Drawing.FontStyle)((System.Drawing.FontStyle.Bold | System.Drawing.FontStyle.Italic))), System.Drawing.GraphicsUnit.Point, ((byte)(0)));
            this.label81.ForeColor = System.Drawing.Color.Black;
            this.label81.Location = new System.Drawing.Point(216, 153);
            this.label81.Name = "label81";
            this.label81.Size = new System.Drawing.Size(20, 19);
            this.label81.TabIndex = 28;
            this.label81.Text = "A";
            // 
            // label82
            // 
            this.label82.AutoSize = true;
            this.label82.Font = new System.Drawing.Font("Times New Roman", 12F, ((System.Drawing.FontStyle)((System.Drawing.FontStyle.Bold | System.Drawing.FontStyle.Italic))), System.Drawing.GraphicsUnit.Point, ((byte)(0)));
            this.label82.ForeColor = System.Drawing.Color.Black;
            this.label82.Location = new System.Drawing.Point(216, 122);
            this.label82.Name = "label82";
            this.label82.Size = new System.Drawing.Size(20, 19);
            this.label82.TabIndex = 27;
            this.label82.Text = "A";
            // 
            // label83
            // 
            this.label83.AutoSize = true;
            this.label83.Font = new System.Drawing.Font("Times New Roman", 12F, ((System.Drawing.FontStyle)((System.Drawing.FontStyle.Bold | System.Drawing.FontStyle.Italic))), System.Drawing.GraphicsUnit.Point, ((byte)(0)));
            this.label83.ForeColor = System.Drawing.Color.Black;
            this.label83.Location = new System.Drawing.Point(216, 91);
            this.label83.Name = "label83";
            this.label83.Size = new System.Drawing.Size(20, 19);
            this.label83.TabIndex = 26;
            this.label83.Text = "A";
            // 
            // label84
            // 
            this.label84.AutoSize = true;
            this.label84.Font = new System.Drawing.Font("Times New Roman", 12F, ((System.Drawing.FontStyle)((System.Drawing.FontStyle.Bold | System.Drawing.FontStyle.Italic))), System.Drawing.GraphicsUnit.Point, ((byte)(0)));
            this.label84.ForeColor = System.Drawing.Color.Black;
            this.label84.Location = new System.Drawing.Point(216, 60);
            this.label84.Name = "label84";
            this.label84.Size = new System.Drawing.Size(20, 19);
            this.label84.TabIndex = 25;
            this.label84.Text = "A";
            // 
            // label85
            // 
            this.label85.AutoSize = true;
            this.label85.Font = new System.Drawing.Font("Times New Roman", 12F, ((System.Drawing.FontStyle)((System.Drawing.FontStyle.Bold | System.Drawing.FontStyle.Italic))), System.Drawing.GraphicsUnit.Point, ((byte)(0)));
            this.label85.ForeColor = System.Drawing.Color.Black;
            this.label85.Location = new System.Drawing.Point(216, 29);
            this.label85.Name = "label85";
            this.label85.Size = new System.Drawing.Size(20, 19);
            this.label85.TabIndex = 24;
            this.label85.Text = "A";
            // 
            // label86
            // 
            this.label86.AutoSize = true;
            this.label86.Font = new System.Drawing.Font("Times New Roman", 12F, ((System.Drawing.FontStyle)((System.Drawing.FontStyle.Bold | System.Drawing.FontStyle.Italic))), System.Drawing.GraphicsUnit.Point, ((byte)(0)));
            this.label86.ForeColor = System.Drawing.Color.Black;
            this.label86.Location = new System.Drawing.Point(128, 153);
            this.label86.Name = "label86";
            this.label86.Size = new System.Drawing.Size(20, 19);
            this.label86.TabIndex = 23;
            this.label86.Text = "V";
            // 
            // label87
            // 
            this.label87.AutoSize = true;
            this.label87.Font = new System.Drawing.Font("Times New Roman", 12F, ((System.Drawing.FontStyle)((System.Drawing.FontStyle.Bold | System.Drawing.FontStyle.Italic))), System.Drawing.GraphicsUnit.Point, ((byte)(0)));
            this.label87.ForeColor = System.Drawing.Color.Black;
            this.label87.Location = new System.Drawing.Point(128, 122);
            this.label87.Name = "label87";
            this.label87.Size = new System.Drawing.Size(20, 19);
            this.label87.TabIndex = 22;
            this.label87.Text = "V";
            // 
            // label88
            // 
            this.label88.AutoSize = true;
            this.label88.Font = new System.Drawing.Font("Times New Roman", 12F, ((System.Drawing.FontStyle)((System.Drawing.FontStyle.Bold | System.Drawing.FontStyle.Italic))), System.Drawing.GraphicsUnit.Point, ((byte)(0)));
            this.label88.ForeColor = System.Drawing.Color.Black;
            this.label88.Location = new System.Drawing.Point(128, 91);
            this.label88.Name = "label88";
            this.label88.Size = new System.Drawing.Size(20, 19);
            this.label88.TabIndex = 21;
            this.label88.Text = "V";
            // 
            // label89
            // 
            this.label89.AutoSize = true;
            this.label89.Font = new System.Drawing.Font("Times New Roman", 12F, ((System.Drawing.FontStyle)((System.Drawing.FontStyle.Bold | System.Drawing.FontStyle.Italic))), System.Drawing.GraphicsUnit.Point, ((byte)(0)));
            this.label89.ForeColor = System.Drawing.Color.Black;
            this.label89.Location = new System.Drawing.Point(128, 60);
            this.label89.Name = "label89";
            this.label89.Size = new System.Drawing.Size(20, 19);
            this.label89.TabIndex = 20;
            this.label89.Text = "V";
            // 
            // label90
            // 
            this.label90.AutoSize = true;
            this.label90.Font = new System.Drawing.Font("Times New Roman", 12F, ((System.Drawing.FontStyle)((System.Drawing.FontStyle.Bold | System.Drawing.FontStyle.Italic))), System.Drawing.GraphicsUnit.Point, ((byte)(0)));
            this.label90.ForeColor = System.Drawing.Color.Black;
            this.label90.Location = new System.Drawing.Point(128, 29);
            this.label90.Name = "label90";
            this.label90.Size = new System.Drawing.Size(20, 19);
            this.label90.TabIndex = 19;
            this.label90.Text = "V";
            // 
            // sensorFiveTime
            // 
            this.sensorFiveTime.BackColor = System.Drawing.SystemColors.Control;
            this.sensorFiveTime.BorderStyle = System.Windows.Forms.BorderStyle.None;
            this.sensorFiveTime.Font = new System.Drawing.Font("宋体", 12F, System.Drawing.FontStyle.Regular, System.Drawing.GraphicsUnit.Point, ((byte)(134)));
            this.sensorFiveTime.ForeColor = System.Drawing.Color.Black;
            this.sensorFiveTime.Location = new System.Drawing.Point(361, 152);
            this.sensorFiveTime.Name = "sensorFiveTime";
            this.sensorFiveTime.ReadOnly = true;
            this.sensorFiveTime.Size = new System.Drawing.Size(170, 19);
            this.sensorFiveTime.TabIndex = 17;
            this.sensorFiveTime.TextAlign = System.Windows.Forms.HorizontalAlignment.Center;
            // 
            // sensorFourTime
            // 
            this.sensorFourTime.BackColor = System.Drawing.SystemColors.Control;
            this.sensorFourTime.BorderStyle = System.Windows.Forms.BorderStyle.None;
            this.sensorFourTime.Font = new System.Drawing.Font("宋体", 12F, System.Drawing.FontStyle.Regular, System.Drawing.GraphicsUnit.Point, ((byte)(134)));
            this.sensorFourTime.ForeColor = System.Drawing.Color.Black;
            this.sensorFourTime.Location = new System.Drawing.Point(361, 121);
            this.sensorFourTime.Name = "sensorFourTime";
            this.sensorFourTime.ReadOnly = true;
            this.sensorFourTime.Size = new System.Drawing.Size(170, 19);
            this.sensorFourTime.TabIndex = 16;
            this.sensorFourTime.TextAlign = System.Windows.Forms.HorizontalAlignment.Center;
            // 
            // sensorFiveStatus
            // 
            this.sensorFiveStatus.BackColor = System.Drawing.Color.Red;
            this.sensorFiveStatus.BorderStyle = System.Windows.Forms.BorderStyle.None;
            this.sensorFiveStatus.Font = new System.Drawing.Font("宋体", 12F, System.Drawing.FontStyle.Regular, System.Drawing.GraphicsUnit.Point, ((byte)(134)));
            this.sensorFiveStatus.ForeColor = System.Drawing.Color.White;
            this.sensorFiveStatus.Location = new System.Drawing.Point(550, 152);
            this.sensorFiveStatus.Name = "sensorFiveStatus";
            this.sensorFiveStatus.ReadOnly = true;
            this.sensorFiveStatus.Size = new System.Drawing.Size(70, 19);
            this.sensorFiveStatus.TabIndex = 16;
            this.sensorFiveStatus.Text = "关闭";
            this.sensorFiveStatus.TextAlign = System.Windows.Forms.HorizontalAlignment.Center;
            // 
            // sensorThreeTime
            // 
            this.sensorThreeTime.BackColor = System.Drawing.SystemColors.Control;
            this.sensorThreeTime.BorderStyle = System.Windows.Forms.BorderStyle.None;
            this.sensorThreeTime.Font = new System.Drawing.Font("宋体", 12F, System.Drawing.FontStyle.Regular, System.Drawing.GraphicsUnit.Point, ((byte)(134)));
            this.sensorThreeTime.ForeColor = System.Drawing.Color.Black;
            this.sensorThreeTime.Location = new System.Drawing.Point(361, 90);
            this.sensorThreeTime.Name = "sensorThreeTime";
            this.sensorThreeTime.ReadOnly = true;
            this.sensorThreeTime.Size = new System.Drawing.Size(170, 19);
            this.sensorThreeTime.TabIndex = 15;
            this.sensorThreeTime.TextAlign = System.Windows.Forms.HorizontalAlignment.Center;
            // 
            // sensorFourStatus
            // 
            this.sensorFourStatus.BackColor = System.Drawing.Color.Red;
            this.sensorFourStatus.BorderStyle = System.Windows.Forms.BorderStyle.None;
            this.sensorFourStatus.Font = new System.Drawing.Font("宋体", 12F, System.Drawing.FontStyle.Regular, System.Drawing.GraphicsUnit.Point, ((byte)(134)));
            this.sensorFourStatus.ForeColor = System.Drawing.Color.White;
            this.sensorFourStatus.Location = new System.Drawing.Point(549, 121);
            this.sensorFourStatus.Name = "sensorFourStatus";
            this.sensorFourStatus.ReadOnly = true;
            this.sensorFourStatus.Size = new System.Drawing.Size(70, 19);
            this.sensorFourStatus.TabIndex = 16;
            this.sensorFourStatus.Text = "关闭";
            this.sensorFourStatus.TextAlign = System.Windows.Forms.HorizontalAlignment.Center;
            // 
            // sensorTwoTime
            // 
            this.sensorTwoTime.BackColor = System.Drawing.SystemColors.Control;
            this.sensorTwoTime.BorderStyle = System.Windows.Forms.BorderStyle.None;
            this.sensorTwoTime.Font = new System.Drawing.Font("宋体", 12F, System.Drawing.FontStyle.Regular, System.Drawing.GraphicsUnit.Point, ((byte)(134)));
            this.sensorTwoTime.ForeColor = System.Drawing.Color.Black;
            this.sensorTwoTime.Location = new System.Drawing.Point(361, 59);
            this.sensorTwoTime.Name = "sensorTwoTime";
            this.sensorTwoTime.ReadOnly = true;
            this.sensorTwoTime.Size = new System.Drawing.Size(170, 19);
            this.sensorTwoTime.TabIndex = 14;
            this.sensorTwoTime.TextAlign = System.Windows.Forms.HorizontalAlignment.Center;
            // 
            // sensorThreeStatus
            // 
            this.sensorThreeStatus.BackColor = System.Drawing.Color.Red;
            this.sensorThreeStatus.BorderStyle = System.Windows.Forms.BorderStyle.None;
            this.sensorThreeStatus.Font = new System.Drawing.Font("宋体", 12F, System.Drawing.FontStyle.Regular, System.Drawing.GraphicsUnit.Point, ((byte)(134)));
            this.sensorThreeStatus.ForeColor = System.Drawing.Color.White;
            this.sensorThreeStatus.Location = new System.Drawing.Point(549, 90);
            this.sensorThreeStatus.Name = "sensorThreeStatus";
            this.sensorThreeStatus.ReadOnly = true;
            this.sensorThreeStatus.Size = new System.Drawing.Size(70, 19);
            this.sensorThreeStatus.TabIndex = 16;
            this.sensorThreeStatus.Text = "关闭";
            this.sensorThreeStatus.TextAlign = System.Windows.Forms.HorizontalAlignment.Center;
            // 
            // sensorOneTime
            // 
            this.sensorOneTime.BackColor = System.Drawing.SystemColors.Control;
            this.sensorOneTime.BorderStyle = System.Windows.Forms.BorderStyle.None;
            this.sensorOneTime.Font = new System.Drawing.Font("宋体", 12F, System.Drawing.FontStyle.Regular, System.Drawing.GraphicsUnit.Point, ((byte)(134)));
            this.sensorOneTime.ForeColor = System.Drawing.Color.Black;
            this.sensorOneTime.Location = new System.Drawing.Point(361, 28);
            this.sensorOneTime.Name = "sensorOneTime";
            this.sensorOneTime.ReadOnly = true;
            this.sensorOneTime.Size = new System.Drawing.Size(170, 19);
            this.sensorOneTime.TabIndex = 13;
            this.sensorOneTime.TextAlign = System.Windows.Forms.HorizontalAlignment.Center;
            // 
            // sensorTwoStatus
            // 
            this.sensorTwoStatus.BackColor = System.Drawing.Color.Red;
            this.sensorTwoStatus.BorderStyle = System.Windows.Forms.BorderStyle.None;
            this.sensorTwoStatus.Font = new System.Drawing.Font("宋体", 12F, System.Drawing.FontStyle.Regular, System.Drawing.GraphicsUnit.Point, ((byte)(134)));
            this.sensorTwoStatus.ForeColor = System.Drawing.Color.White;
            this.sensorTwoStatus.Location = new System.Drawing.Point(549, 59);
            this.sensorTwoStatus.Name = "sensorTwoStatus";
            this.sensorTwoStatus.ReadOnly = true;
            this.sensorTwoStatus.Size = new System.Drawing.Size(70, 19);
            this.sensorTwoStatus.TabIndex = 16;
            this.sensorTwoStatus.Text = "关闭";
            this.sensorTwoStatus.TextAlign = System.Windows.Forms.HorizontalAlignment.Center;
            // 
            // sensorFivePower
            // 
            this.sensorFivePower.BackColor = System.Drawing.SystemColors.Control;
            this.sensorFivePower.BorderStyle = System.Windows.Forms.BorderStyle.None;
            this.sensorFivePower.Font = new System.Drawing.Font("宋体", 12F, System.Drawing.FontStyle.Regular, System.Drawing.GraphicsUnit.Point, ((byte)(134)));
            this.sensorFivePower.ForeColor = System.Drawing.Color.Black;
            this.sensorFivePower.Location = new System.Drawing.Point(245, 152);
            this.sensorFivePower.Name = "sensorFivePower";
            this.sensorFivePower.ReadOnly = true;
            this.sensorFivePower.Size = new System.Drawing.Size(70, 19);
            this.sensorFivePower.TabIndex = 8;
            this.sensorFivePower.TextAlign = System.Windows.Forms.HorizontalAlignment.Center;
            // 
            // sensorThreePower
            // 
            this.sensorThreePower.BackColor = System.Drawing.SystemColors.Control;
            this.sensorThreePower.BorderStyle = System.Windows.Forms.BorderStyle.None;
            this.sensorThreePower.Font = new System.Drawing.Font("宋体", 12F, System.Drawing.FontStyle.Regular, System.Drawing.GraphicsUnit.Point, ((byte)(134)));
            this.sensorThreePower.ForeColor = System.Drawing.Color.Black;
            this.sensorThreePower.Location = new System.Drawing.Point(245, 90);
            this.sensorThreePower.Name = "sensorThreePower";
            this.sensorThreePower.ReadOnly = true;
            this.sensorThreePower.Size = new System.Drawing.Size(70, 19);
            this.sensorThreePower.TabIndex = 8;
            this.sensorThreePower.TextAlign = System.Windows.Forms.HorizontalAlignment.Center;
            // 
            // sensorFourPower
            // 
            this.sensorFourPower.BackColor = System.Drawing.SystemColors.Control;
            this.sensorFourPower.BorderStyle = System.Windows.Forms.BorderStyle.None;
            this.sensorFourPower.Font = new System.Drawing.Font("宋体", 12F, System.Drawing.FontStyle.Regular, System.Drawing.GraphicsUnit.Point, ((byte)(134)));
            this.sensorFourPower.ForeColor = System.Drawing.Color.Black;
            this.sensorFourPower.Location = new System.Drawing.Point(245, 121);
            this.sensorFourPower.Name = "sensorFourPower";
            this.sensorFourPower.ReadOnly = true;
            this.sensorFourPower.Size = new System.Drawing.Size(70, 19);
            this.sensorFourPower.TabIndex = 8;
            this.sensorFourPower.TextAlign = System.Windows.Forms.HorizontalAlignment.Center;
            // 
            // sensorTwoPower
            // 
            this.sensorTwoPower.BackColor = System.Drawing.SystemColors.Control;
            this.sensorTwoPower.BorderStyle = System.Windows.Forms.BorderStyle.None;
            this.sensorTwoPower.Font = new System.Drawing.Font("宋体", 12F, System.Drawing.FontStyle.Regular, System.Drawing.GraphicsUnit.Point, ((byte)(134)));
            this.sensorTwoPower.ForeColor = System.Drawing.Color.Black;
            this.sensorTwoPower.Location = new System.Drawing.Point(245, 59);
            this.sensorTwoPower.Name = "sensorTwoPower";
            this.sensorTwoPower.ReadOnly = true;
            this.sensorTwoPower.Size = new System.Drawing.Size(70, 19);
            this.sensorTwoPower.TabIndex = 8;
            this.sensorTwoPower.TextAlign = System.Windows.Forms.HorizontalAlignment.Center;
            // 
            // sensorOnePower
            // 
            this.sensorOnePower.BackColor = System.Drawing.SystemColors.Control;
            this.sensorOnePower.BorderStyle = System.Windows.Forms.BorderStyle.None;
            this.sensorOnePower.Font = new System.Drawing.Font("宋体", 12F, System.Drawing.FontStyle.Regular, System.Drawing.GraphicsUnit.Point, ((byte)(134)));
            this.sensorOnePower.ForeColor = System.Drawing.Color.Black;
            this.sensorOnePower.Location = new System.Drawing.Point(245, 28);
            this.sensorOnePower.Name = "sensorOnePower";
            this.sensorOnePower.ReadOnly = true;
            this.sensorOnePower.Size = new System.Drawing.Size(70, 19);
            this.sensorOnePower.TabIndex = 8;
            this.sensorOnePower.TextAlign = System.Windows.Forms.HorizontalAlignment.Center;
            // 
            // sensorFiveCur
            // 
            this.sensorFiveCur.BackColor = System.Drawing.SystemColors.Control;
            this.sensorFiveCur.BorderStyle = System.Windows.Forms.BorderStyle.None;
            this.sensorFiveCur.Font = new System.Drawing.Font("宋体", 12F, System.Drawing.FontStyle.Regular, System.Drawing.GraphicsUnit.Point, ((byte)(134)));
            this.sensorFiveCur.ForeColor = System.Drawing.Color.Blue;
            this.sensorFiveCur.Location = new System.Drawing.Point(153, 152);
            this.sensorFiveCur.Name = "sensorFiveCur";
            this.sensorFiveCur.ReadOnly = true;
            this.sensorFiveCur.Size = new System.Drawing.Size(60, 19);
            this.sensorFiveCur.TabIndex = 8;
            this.sensorFiveCur.TextAlign = System.Windows.Forms.HorizontalAlignment.Center;
            // 
            // sensorThreeCur
            // 
            this.sensorThreeCur.BackColor = System.Drawing.SystemColors.Control;
            this.sensorThreeCur.BorderStyle = System.Windows.Forms.BorderStyle.None;
            this.sensorThreeCur.Font = new System.Drawing.Font("宋体", 12F, System.Drawing.FontStyle.Regular, System.Drawing.GraphicsUnit.Point, ((byte)(134)));
            this.sensorThreeCur.ForeColor = System.Drawing.Color.Blue;
            this.sensorThreeCur.Location = new System.Drawing.Point(153, 90);
            this.sensorThreeCur.Name = "sensorThreeCur";
            this.sensorThreeCur.ReadOnly = true;
            this.sensorThreeCur.Size = new System.Drawing.Size(60, 19);
            this.sensorThreeCur.TabIndex = 8;
            this.sensorThreeCur.TextAlign = System.Windows.Forms.HorizontalAlignment.Center;
            // 
            // sensorFourCur
            // 
            this.sensorFourCur.BackColor = System.Drawing.SystemColors.Control;
            this.sensorFourCur.BorderStyle = System.Windows.Forms.BorderStyle.None;
            this.sensorFourCur.Font = new System.Drawing.Font("宋体", 12F, System.Drawing.FontStyle.Regular, System.Drawing.GraphicsUnit.Point, ((byte)(134)));
            this.sensorFourCur.ForeColor = System.Drawing.Color.Blue;
            this.sensorFourCur.Location = new System.Drawing.Point(153, 121);
            this.sensorFourCur.Name = "sensorFourCur";
            this.sensorFourCur.ReadOnly = true;
            this.sensorFourCur.Size = new System.Drawing.Size(60, 19);
            this.sensorFourCur.TabIndex = 8;
            this.sensorFourCur.TextAlign = System.Windows.Forms.HorizontalAlignment.Center;
            // 
            // sensorOneStatus
            // 
            this.sensorOneStatus.BackColor = System.Drawing.Color.Red;
            this.sensorOneStatus.BorderStyle = System.Windows.Forms.BorderStyle.None;
            this.sensorOneStatus.Font = new System.Drawing.Font("宋体", 12F, System.Drawing.FontStyle.Regular, System.Drawing.GraphicsUnit.Point, ((byte)(134)));
            this.sensorOneStatus.ForeColor = System.Drawing.Color.White;
            this.sensorOneStatus.Location = new System.Drawing.Point(549, 28);
            this.sensorOneStatus.Name = "sensorOneStatus";
            this.sensorOneStatus.ReadOnly = true;
            this.sensorOneStatus.Size = new System.Drawing.Size(70, 19);
            this.sensorOneStatus.TabIndex = 16;
            this.sensorOneStatus.Text = "关闭";
            this.sensorOneStatus.TextAlign = System.Windows.Forms.HorizontalAlignment.Center;
            // 
            // sensorTwoCur
            // 
            this.sensorTwoCur.BackColor = System.Drawing.SystemColors.Control;
            this.sensorTwoCur.BorderStyle = System.Windows.Forms.BorderStyle.None;
            this.sensorTwoCur.Font = new System.Drawing.Font("宋体", 12F, System.Drawing.FontStyle.Regular, System.Drawing.GraphicsUnit.Point, ((byte)(134)));
            this.sensorTwoCur.ForeColor = System.Drawing.Color.Blue;
            this.sensorTwoCur.Location = new System.Drawing.Point(153, 59);
            this.sensorTwoCur.Name = "sensorTwoCur";
            this.sensorTwoCur.ReadOnly = true;
            this.sensorTwoCur.Size = new System.Drawing.Size(60, 19);
            this.sensorTwoCur.TabIndex = 8;
            this.sensorTwoCur.TextAlign = System.Windows.Forms.HorizontalAlignment.Center;
            // 
            // sensorOneCur
            // 
            this.sensorOneCur.BackColor = System.Drawing.SystemColors.Control;
            this.sensorOneCur.BorderStyle = System.Windows.Forms.BorderStyle.None;
            this.sensorOneCur.Font = new System.Drawing.Font("宋体", 12F, System.Drawing.FontStyle.Regular, System.Drawing.GraphicsUnit.Point, ((byte)(134)));
            this.sensorOneCur.ForeColor = System.Drawing.Color.Blue;
            this.sensorOneCur.Location = new System.Drawing.Point(153, 28);
            this.sensorOneCur.Name = "sensorOneCur";
            this.sensorOneCur.ReadOnly = true;
            this.sensorOneCur.Size = new System.Drawing.Size(60, 19);
            this.sensorOneCur.TabIndex = 8;
            this.sensorOneCur.TextAlign = System.Windows.Forms.HorizontalAlignment.Center;
            // 
            // sensorFiveVol
            // 
            this.sensorFiveVol.BackColor = System.Drawing.SystemColors.Control;
            this.sensorFiveVol.BorderStyle = System.Windows.Forms.BorderStyle.None;
            this.sensorFiveVol.Font = new System.Drawing.Font("宋体", 12F, System.Drawing.FontStyle.Regular, System.Drawing.GraphicsUnit.Point, ((byte)(134)));
            this.sensorFiveVol.ForeColor = System.Drawing.Color.Red;
            this.sensorFiveVol.Location = new System.Drawing.Point(59, 152);
            this.sensorFiveVol.Name = "sensorFiveVol";
            this.sensorFiveVol.ReadOnly = true;
            this.sensorFiveVol.Size = new System.Drawing.Size(60, 19);
            this.sensorFiveVol.TabIndex = 9;
            this.sensorFiveVol.TextAlign = System.Windows.Forms.HorizontalAlignment.Center;
            // 
            // sensorThreeVol
            // 
            this.sensorThreeVol.BackColor = System.Drawing.SystemColors.Control;
            this.sensorThreeVol.BorderStyle = System.Windows.Forms.BorderStyle.None;
            this.sensorThreeVol.Font = new System.Drawing.Font("宋体", 12F, System.Drawing.FontStyle.Regular, System.Drawing.GraphicsUnit.Point, ((byte)(134)));
            this.sensorThreeVol.ForeColor = System.Drawing.Color.Red;
            this.sensorThreeVol.Location = new System.Drawing.Point(59, 90);
            this.sensorThreeVol.Name = "sensorThreeVol";
            this.sensorThreeVol.ReadOnly = true;
            this.sensorThreeVol.Size = new System.Drawing.Size(60, 19);
            this.sensorThreeVol.TabIndex = 9;
            this.sensorThreeVol.TextAlign = System.Windows.Forms.HorizontalAlignment.Center;
            // 
            // label91
            // 
            this.label91.AutoSize = true;
            this.label91.Font = new System.Drawing.Font("Times New Roman", 12F, System.Drawing.FontStyle.Bold, System.Drawing.GraphicsUnit.Point, ((byte)(0)));
            this.label91.ForeColor = System.Drawing.Color.Black;
            this.label91.Location = new System.Drawing.Point(5, 155);
            this.label91.Name = "label91";
            this.label91.Size = new System.Drawing.Size(68, 19);
            this.label91.TabIndex = 6;
            this.label91.Text = "通道5：";
            // 
            // sensorFourVol
            // 
            this.sensorFourVol.BackColor = System.Drawing.SystemColors.Control;
            this.sensorFourVol.BorderStyle = System.Windows.Forms.BorderStyle.None;
            this.sensorFourVol.Font = new System.Drawing.Font("宋体", 12F, System.Drawing.FontStyle.Regular, System.Drawing.GraphicsUnit.Point, ((byte)(134)));
            this.sensorFourVol.ForeColor = System.Drawing.Color.Red;
            this.sensorFourVol.Location = new System.Drawing.Point(59, 121);
            this.sensorFourVol.Name = "sensorFourVol";
            this.sensorFourVol.ReadOnly = true;
            this.sensorFourVol.Size = new System.Drawing.Size(60, 19);
            this.sensorFourVol.TabIndex = 9;
            this.sensorFourVol.TextAlign = System.Windows.Forms.HorizontalAlignment.Center;
            // 
            // label92
            // 
            this.label92.AutoSize = true;
            this.label92.Font = new System.Drawing.Font("Times New Roman", 12F, System.Drawing.FontStyle.Bold, System.Drawing.GraphicsUnit.Point, ((byte)(0)));
            this.label92.ForeColor = System.Drawing.Color.Black;
            this.label92.Location = new System.Drawing.Point(5, 91);
            this.label92.Name = "label92";
            this.label92.Size = new System.Drawing.Size(68, 19);
            this.label92.TabIndex = 6;
            this.label92.Text = "通道3：";
            // 
            // label93
            // 
            this.label93.AutoSize = true;
            this.label93.Font = new System.Drawing.Font("Times New Roman", 12F, System.Drawing.FontStyle.Bold, System.Drawing.GraphicsUnit.Point, ((byte)(0)));
            this.label93.ForeColor = System.Drawing.Color.Black;
            this.label93.Location = new System.Drawing.Point(5, 123);
            this.label93.Name = "label93";
            this.label93.Size = new System.Drawing.Size(68, 19);
            this.label93.TabIndex = 6;
            this.label93.Text = "通道4：";
            // 
            // sensorTwoVol
            // 
            this.sensorTwoVol.BackColor = System.Drawing.SystemColors.Control;
            this.sensorTwoVol.BorderStyle = System.Windows.Forms.BorderStyle.None;
            this.sensorTwoVol.Font = new System.Drawing.Font("宋体", 12F, System.Drawing.FontStyle.Regular, System.Drawing.GraphicsUnit.Point, ((byte)(134)));
            this.sensorTwoVol.ForeColor = System.Drawing.Color.Red;
            this.sensorTwoVol.Location = new System.Drawing.Point(59, 59);
            this.sensorTwoVol.Name = "sensorTwoVol";
            this.sensorTwoVol.ReadOnly = true;
            this.sensorTwoVol.Size = new System.Drawing.Size(60, 19);
            this.sensorTwoVol.TabIndex = 9;
            this.sensorTwoVol.TextAlign = System.Windows.Forms.HorizontalAlignment.Center;
            // 
            // label94
            // 
            this.label94.AutoSize = true;
            this.label94.Font = new System.Drawing.Font("Times New Roman", 12F, System.Drawing.FontStyle.Bold, System.Drawing.GraphicsUnit.Point, ((byte)(0)));
            this.label94.ForeColor = System.Drawing.Color.Black;
            this.label94.Location = new System.Drawing.Point(5, 59);
            this.label94.Name = "label94";
            this.label94.Size = new System.Drawing.Size(68, 19);
            this.label94.TabIndex = 6;
            this.label94.Text = "通道2：";
            // 
            // sensorOneVol
            // 
            this.sensorOneVol.BackColor = System.Drawing.SystemColors.Control;
            this.sensorOneVol.BorderStyle = System.Windows.Forms.BorderStyle.None;
            this.sensorOneVol.Font = new System.Drawing.Font("宋体", 12F, System.Drawing.FontStyle.Regular, System.Drawing.GraphicsUnit.Point, ((byte)(134)));
            this.sensorOneVol.ForeColor = System.Drawing.Color.Red;
            this.sensorOneVol.Location = new System.Drawing.Point(59, 28);
            this.sensorOneVol.Name = "sensorOneVol";
            this.sensorOneVol.ReadOnly = true;
            this.sensorOneVol.Size = new System.Drawing.Size(60, 19);
            this.sensorOneVol.TabIndex = 9;
            this.sensorOneVol.TextAlign = System.Windows.Forms.HorizontalAlignment.Center;
            // 
            // label95
            // 
            this.label95.AutoSize = true;
            this.label95.Font = new System.Drawing.Font("Times New Roman", 12F, System.Drawing.FontStyle.Bold, System.Drawing.GraphicsUnit.Point, ((byte)(0)));
            this.label95.ForeColor = System.Drawing.Color.Black;
            this.label95.Location = new System.Drawing.Point(5, 27);
            this.label95.Name = "label95";
            this.label95.Size = new System.Drawing.Size(68, 19);
            this.label95.TabIndex = 6;
            this.label95.Text = "通道1：";
            // 
            // tabPage2
            // 
            this.tabPage2.BackColor = System.Drawing.Color.AliceBlue;
            this.tabPage2.Controls.Add(this.TabLPnlSensor);
            this.tabPage2.Font = new System.Drawing.Font("Times New Roman", 14.25F);
            this.tabPage2.Location = new System.Drawing.Point(4, 30);
            this.tabPage2.Name = "tabPage2";
            this.tabPage2.Size = new System.Drawing.Size(1161, 539);
            this.tabPage2.TabIndex = 7;
            this.tabPage2.Text = "传感器曲线";
            // 
            // TabLPnlSensor
            // 
            this.TabLPnlSensor.BackColor = System.Drawing.Color.AliceBlue;
            this.TabLPnlSensor.ColumnCount = 4;
            this.TabLPnlSensor.ColumnStyles.Add(new System.Windows.Forms.ColumnStyle(System.Windows.Forms.SizeType.Percent, 25F));
            this.TabLPnlSensor.ColumnStyles.Add(new System.Windows.Forms.ColumnStyle(System.Windows.Forms.SizeType.Percent, 25F));
            this.TabLPnlSensor.ColumnStyles.Add(new System.Windows.Forms.ColumnStyle(System.Windows.Forms.SizeType.Percent, 25F));
            this.TabLPnlSensor.ColumnStyles.Add(new System.Windows.Forms.ColumnStyle(System.Windows.Forms.SizeType.Percent, 25F));
            this.TabLPnlSensor.Controls.Add(this.pnlDO, 0, 1);
            this.TabLPnlSensor.Controls.Add(this.pnlADL, 1, 1);
            this.TabLPnlSensor.Controls.Add(this.pnlCTD, 2, 1);
            this.TabLPnlSensor.Controls.Add(this.pnlCDOM, 3, 1);
            this.TabLPnlSensor.Controls.Add(this.pnlDO1, 0, 0);
            this.TabLPnlSensor.Controls.Add(this.pnlADL1, 1, 0);
            this.TabLPnlSensor.Controls.Add(this.pnlCTD1, 2, 0);
            this.TabLPnlSensor.Controls.Add(this.pnlCDOM1, 3, 0);
            this.TabLPnlSensor.Dock = System.Windows.Forms.DockStyle.Fill;
            this.TabLPnlSensor.Location = new System.Drawing.Point(0, 0);
            this.TabLPnlSensor.Name = "TabLPnlSensor";
            this.TabLPnlSensor.RowCount = 2;
            this.TabLPnlSensor.RowStyles.Add(new System.Windows.Forms.RowStyle(System.Windows.Forms.SizeType.Percent, 20.55556F));
            this.TabLPnlSensor.RowStyles.Add(new System.Windows.Forms.RowStyle(System.Windows.Forms.SizeType.Percent, 79.44444F));
            this.TabLPnlSensor.Size = new System.Drawing.Size(1161, 539);
            this.TabLPnlSensor.TabIndex = 0;
            // 
            // pnlDO
            // 
            this.pnlDO.Controls.Add(this.button14);
            this.pnlDO.Controls.Add(this.lblDO);
            this.pnlDO.Controls.Add(this.lblDOB);
            this.pnlDO.Controls.Add(this.picDO);
            this.pnlDO.Dock = System.Windows.Forms.DockStyle.Fill;
            this.pnlDO.Location = new System.Drawing.Point(3, 113);
            this.pnlDO.Name = "pnlDO";
            this.pnlDO.Size = new System.Drawing.Size(284, 423);
            this.pnlDO.TabIndex = 4;
            // 
            // button14
            // 
            this.button14.FlatStyle = System.Windows.Forms.FlatStyle.Flat;
            this.button14.Font = new System.Drawing.Font("宋体", 10.5F, System.Drawing.FontStyle.Regular, System.Drawing.GraphicsUnit.Point, ((byte)(134)));
            this.button14.ForeColor = System.Drawing.Color.FromArgb(((int)(((byte)(0)))), ((int)(((byte)(192)))), ((int)(((byte)(192)))));
            this.button14.Location = new System.Drawing.Point(0, 0);
            this.button14.Name = "button14";
            this.button14.Size = new System.Drawing.Size(75, 25);
            this.button14.TabIndex = 4;
            this.button14.Text = "更改纵轴";
            this.button14.UseVisualStyleBackColor = true;
            this.button14.Click += new System.EventHandler(this.button14_Click_1);
            // 
            // lblDO
            // 
            this.lblDO.AutoSize = true;
            this.lblDO.Font = new System.Drawing.Font("Times New Roman", 10.5F);
            this.lblDO.Location = new System.Drawing.Point(132, 131);
            this.lblDO.Name = "lblDO";
            this.lblDO.Size = new System.Drawing.Size(41, 16);
            this.lblDO.TabIndex = 1;
            this.lblDO.Text = "lblDO";
            this.lblDO.Visible = false;
            // 
            // lblDOB
            // 
            this.lblDOB.AutoSize = true;
            this.lblDOB.Font = new System.Drawing.Font("Times New Roman", 15F);
            this.lblDOB.Location = new System.Drawing.Point(157, 212);
            this.lblDOB.Name = "lblDOB";
            this.lblDOB.Size = new System.Drawing.Size(73, 22);
            this.lblDOB.TabIndex = 2;
            this.lblDOB.Text = "lblDOB";
            this.lblDOB.Visible = false;
            // 
            // picDO
            // 
            // 
            // 
            // 
            this.picDO.Aspect.ZOffset = 0D;
            // 
            // 
            // 
            // 
            // 
            // 
            // 
            // 
            // 
            this.picDO.Axes.Bottom.Title.Caption = "个数/个";
            this.picDO.Axes.Bottom.Title.Lines = new string[] {
        "个数/个"};
            // 
            // 
            // 
            this.picDO.Axes.Left.Automatic = false;
            this.picDO.Axes.Left.AutomaticMaximum = false;
            this.picDO.Axes.Left.AutomaticMinimum = false;
            this.picDO.Axes.Left.Maximum = 769D;
            this.picDO.Axes.Left.Minimum = 190D;
            // 
            // 
            // 
            this.picDO.Axes.Left.Title.Caption = "采集值（mg/L）";
            this.picDO.Axes.Left.Title.Lines = new string[] {
        "采集值（mg/L）"};
            this.picDO.BackColor = System.Drawing.Color.Transparent;
            this.picDO.Cursor = System.Windows.Forms.Cursors.Default;
            this.picDO.Dock = System.Windows.Forms.DockStyle.Fill;
            // 
            // 
            // 
            this.picDO.Header.Alignment = System.Drawing.StringAlignment.Far;
            // 
            // 
            // 
            this.picDO.Header.Font.Size = 10;
            this.picDO.Header.Font.SizeFloat = 10F;
            this.picDO.Header.Lines = new string[] {
        "山仪所溶解氧采集值曲线"};
            // 
            // 
            // 
            this.picDO.Legend.Visible = false;
            this.picDO.Location = new System.Drawing.Point(0, 0);
            this.picDO.Name = "picDO";
            // 
            // 
            // 
            // 
            // 
            // 
            this.picDO.Panel.Brush.Color = System.Drawing.Color.Transparent;
            // 
            // 
            // 
            this.picDO.Panel.Brush.Gradient.EndColor = System.Drawing.Color.FromArgb(((int)(((byte)(240)))), ((int)(((byte)(248)))), ((int)(((byte)(255)))));
            this.picDO.Panel.Brush.Gradient.StartColor = System.Drawing.Color.FromArgb(((int)(((byte)(240)))), ((int)(((byte)(248)))), ((int)(((byte)(255)))));
            this.picDO.Panel.Brush.Gradient.UseMiddle = false;
            this.picDO.Series.Add(this.line1);
            this.picDO.Size = new System.Drawing.Size(284, 423);
            this.picDO.TabIndex = 0;
            // 
            // 
            // 
            this.picDO.Walls.Visible = false;
            this.picDO.DoubleClick += new System.EventHandler(this.picDO_DoubleClick);
            this.picDO.MouseClick += new System.Windows.Forms.MouseEventHandler(this.picDO_MouseClick);
            this.picDO.MouseMove += new System.Windows.Forms.MouseEventHandler(this.picDO_MouseMove);
            // 
            // line1
            // 
            // 
            // 
            // 
            this.line1.Brush.Color = System.Drawing.Color.Blue;
            this.line1.Color = System.Drawing.Color.Blue;
            this.line1.ColorEach = false;
            // 
            // 
            // 
            this.line1.LinePen.Color = System.Drawing.Color.FromArgb(((int)(((byte)(41)))), ((int)(((byte)(61)))), ((int)(((byte)(98)))));
            this.line1.LinePen.Width = 2;
            // 
            // 
            // 
            // 
            // 
            // 
            this.line1.Marks.Callout.ArrowHead = Steema.TeeChart.Styles.ArrowHeadStyles.None;
            this.line1.Marks.Callout.ArrowHeadSize = 8;
            // 
            // 
            // 
            this.line1.Marks.Callout.Brush.Color = System.Drawing.Color.Black;
            this.line1.Marks.Callout.Distance = 0;
            this.line1.Marks.Callout.Draw3D = false;
            this.line1.Marks.Callout.Length = 10;
            this.line1.Marks.Callout.Style = Steema.TeeChart.Styles.PointerStyles.Rectangle;
            // 
            // 
            // 
            // 
            // 
            // 
            // 
            // 
            // 
            this.line1.Pointer.Brush.Gradient.Transparency = 100;
            this.line1.Pointer.Style = Steema.TeeChart.Styles.PointerStyles.Rectangle;
            this.line1.Title = "line1";
            // 
            // 
            // 
            this.line1.XValues.DataMember = "X";
            this.line1.XValues.Order = Steema.TeeChart.Styles.ValueListOrder.Ascending;
            // 
            // 
            // 
            this.line1.YValues.DataMember = "Y";
            // 
            // pnlADL
            // 
            this.pnlADL.Controls.Add(this.button20);
            this.pnlADL.Controls.Add(this.lblADLB);
            this.pnlADL.Controls.Add(this.lblADL);
            this.pnlADL.Controls.Add(this.picPH);
            this.pnlADL.Dock = System.Windows.Forms.DockStyle.Fill;
            this.pnlADL.Location = new System.Drawing.Point(293, 113);
            this.pnlADL.Name = "pnlADL";
            this.pnlADL.Size = new System.Drawing.Size(284, 423);
            this.pnlADL.TabIndex = 5;
            // 
            // button20
            // 
            this.button20.FlatStyle = System.Windows.Forms.FlatStyle.Flat;
            this.button20.Font = new System.Drawing.Font("宋体", 10.5F, System.Drawing.FontStyle.Regular, System.Drawing.GraphicsUnit.Point, ((byte)(134)));
            this.button20.ForeColor = System.Drawing.Color.FromArgb(((int)(((byte)(0)))), ((int)(((byte)(192)))), ((int)(((byte)(192)))));
            this.button20.Location = new System.Drawing.Point(0, 0);
            this.button20.Name = "button20";
            this.button20.Size = new System.Drawing.Size(75, 25);
            this.button20.TabIndex = 5;
            this.button20.Text = "更改纵轴";
            this.button20.UseVisualStyleBackColor = true;
            this.button20.Click += new System.EventHandler(this.button20_Click);
            // 
            // lblADLB
            // 
            this.lblADLB.AutoSize = true;
            this.lblADLB.Font = new System.Drawing.Font("Times New Roman", 15F);
            this.lblADLB.Location = new System.Drawing.Point(47, 113);
            this.lblADLB.Name = "lblADLB";
            this.lblADLB.Size = new System.Drawing.Size(84, 22);
            this.lblADLB.TabIndex = 2;
            this.lblADLB.Text = "lblADLB";
            this.lblADLB.Visible = false;
            // 
            // lblADL
            // 
            this.lblADL.AutoSize = true;
            this.lblADL.Font = new System.Drawing.Font("Times New Roman", 10.5F);
            this.lblADL.Location = new System.Drawing.Point(92, 66);
            this.lblADL.Name = "lblADL";
            this.lblADL.Size = new System.Drawing.Size(48, 16);
            this.lblADL.TabIndex = 1;
            this.lblADL.Text = "lblADL";
            this.lblADL.Visible = false;
            // 
            // picPH
            // 
            // 
            // 
            // 
            this.picPH.Aspect.ZOffset = 0D;
            // 
            // 
            // 
            // 
            // 
            // 
            // 
            // 
            // 
            this.picPH.Axes.Bottom.Title.Caption = "个数/个";
            this.picPH.Axes.Bottom.Title.Lines = new string[] {
        "个数/个"};
            // 
            // 
            // 
            this.picPH.Axes.Left.Automatic = false;
            this.picPH.Axes.Left.AutomaticMaximum = false;
            this.picPH.Axes.Left.AutomaticMinimum = false;
            this.picPH.Axes.Left.Maximum = 993D;
            this.picPH.Axes.Left.Minimum = 327D;
            // 
            // 
            // 
            this.picPH.Axes.Left.Title.Caption = "采集值（mg/L）";
            this.picPH.Axes.Left.Title.Lines = new string[] {
        "采集值（mg/L）"};
            this.picPH.BackColor = System.Drawing.Color.Transparent;
            this.picPH.Dock = System.Windows.Forms.DockStyle.Fill;
            // 
            // 
            // 
            this.picPH.Header.Alignment = System.Drawing.StringAlignment.Far;
            // 
            // 
            // 
            this.picPH.Header.Font.Size = 10;
            this.picPH.Header.Font.SizeFloat = 10F;
            this.picPH.Header.Lines = new string[] {
        "PH采集值曲线"};
            // 
            // 
            // 
            this.picPH.Legend.Visible = false;
            this.picPH.Location = new System.Drawing.Point(0, 0);
            this.picPH.Name = "picPH";
            // 
            // 
            // 
            // 
            // 
            // 
            this.picPH.Panel.Brush.Color = System.Drawing.Color.Transparent;
            // 
            // 
            // 
            this.picPH.Panel.Brush.Gradient.EndColor = System.Drawing.Color.FromArgb(((int)(((byte)(240)))), ((int)(((byte)(248)))), ((int)(((byte)(255)))));
            this.picPH.Panel.Brush.Gradient.StartColor = System.Drawing.Color.FromArgb(((int)(((byte)(240)))), ((int)(((byte)(248)))), ((int)(((byte)(255)))));
            this.picPH.Panel.Brush.Gradient.UseMiddle = false;
            this.picPH.Series.Add(this.line2);
            this.picPH.Size = new System.Drawing.Size(284, 423);
            this.picPH.TabIndex = 0;
            // 
            // 
            // 
            this.picPH.Walls.Visible = false;
            this.picPH.DoubleClick += new System.EventHandler(this.picYLS_DoubleClick);
            this.picPH.MouseMove += new System.Windows.Forms.MouseEventHandler(this.picYLS_MouseMove);
            // 
            // line2
            // 
            // 
            // 
            // 
            this.line2.Brush.Color = System.Drawing.Color.Blue;
            this.line2.Color = System.Drawing.Color.Blue;
            this.line2.ColorEach = false;
            // 
            // 
            // 
            this.line2.LinePen.Color = System.Drawing.Color.FromArgb(((int)(((byte)(41)))), ((int)(((byte)(61)))), ((int)(((byte)(98)))));
            this.line2.LinePen.Width = 2;
            // 
            // 
            // 
            // 
            // 
            // 
            this.line2.Marks.Callout.ArrowHead = Steema.TeeChart.Styles.ArrowHeadStyles.None;
            this.line2.Marks.Callout.ArrowHeadSize = 8;
            // 
            // 
            // 
            this.line2.Marks.Callout.Brush.Color = System.Drawing.Color.Black;
            this.line2.Marks.Callout.Distance = 0;
            this.line2.Marks.Callout.Draw3D = false;
            this.line2.Marks.Callout.Length = 10;
            this.line2.Marks.Callout.Style = Steema.TeeChart.Styles.PointerStyles.Rectangle;
            // 
            // 
            // 
            // 
            // 
            // 
            // 
            // 
            // 
            this.line2.Pointer.Brush.Gradient.Transparency = 100;
            this.line2.Pointer.Style = Steema.TeeChart.Styles.PointerStyles.Rectangle;
            this.line2.Title = "line1";
            // 
            // 
            // 
            this.line2.XValues.DataMember = "X";
            this.line2.XValues.Order = Steema.TeeChart.Styles.ValueListOrder.Ascending;
            // 
            // 
            // 
            this.line2.YValues.DataMember = "Y";
            // 
            // pnlCTD
            // 
            this.pnlCTD.Controls.Add(this.button21);
            this.pnlCTD.Controls.Add(this.lblCTDB);
            this.pnlCTD.Controls.Add(this.lblCTD);
            this.pnlCTD.Controls.Add(this.picCTD);
            this.pnlCTD.Dock = System.Windows.Forms.DockStyle.Fill;
            this.pnlCTD.Location = new System.Drawing.Point(583, 113);
            this.pnlCTD.Name = "pnlCTD";
            this.pnlCTD.Size = new System.Drawing.Size(284, 423);
            this.pnlCTD.TabIndex = 6;
            // 
            // button21
            // 
            this.button21.FlatStyle = System.Windows.Forms.FlatStyle.Flat;
            this.button21.Font = new System.Drawing.Font("宋体", 10.5F, System.Drawing.FontStyle.Regular, System.Drawing.GraphicsUnit.Point, ((byte)(134)));
            this.button21.ForeColor = System.Drawing.Color.FromArgb(((int)(((byte)(0)))), ((int)(((byte)(192)))), ((int)(((byte)(192)))));
            this.button21.Location = new System.Drawing.Point(0, 0);
            this.button21.Name = "button21";
            this.button21.Size = new System.Drawing.Size(75, 25);
            this.button21.TabIndex = 5;
            this.button21.Text = "更改纵轴";
            this.button21.UseVisualStyleBackColor = true;
            this.button21.Click += new System.EventHandler(this.button21_Click);
            // 
            // lblCTDB
            // 
            this.lblCTDB.AutoSize = true;
            this.lblCTDB.Font = new System.Drawing.Font("Times New Roman", 15F);
            this.lblCTDB.Location = new System.Drawing.Point(124, 189);
            this.lblCTDB.Name = "lblCTDB";
            this.lblCTDB.Size = new System.Drawing.Size(84, 22);
            this.lblCTDB.TabIndex = 2;
            this.lblCTDB.Text = "lblCTDB";
            this.lblCTDB.Visible = false;
            // 
            // lblCTD
            // 
            this.lblCTD.AutoSize = true;
            this.lblCTD.Font = new System.Drawing.Font("Times New Roman", 10.5F);
            this.lblCTD.Location = new System.Drawing.Point(100, 98);
            this.lblCTD.Name = "lblCTD";
            this.lblCTD.Size = new System.Drawing.Size(49, 16);
            this.lblCTD.TabIndex = 1;
            this.lblCTD.Text = "lblCTD";
            this.lblCTD.Visible = false;
            // 
            // picCTD
            // 
            // 
            // 
            // 
            this.picCTD.Aspect.ZOffset = 0D;
            // 
            // 
            // 
            // 
            // 
            // 
            // 
            // 
            // 
            this.picCTD.Axes.Bottom.Title.Caption = "个数/个";
            this.picCTD.Axes.Bottom.Title.Lines = new string[] {
        "个数/个"};
            // 
            // 
            // 
            this.picCTD.Axes.Left.Automatic = false;
            this.picCTD.Axes.Left.AutomaticMaximum = false;
            this.picCTD.Axes.Left.AutomaticMinimum = false;
            this.picCTD.Axes.Left.Maximum = 989D;
            this.picCTD.Axes.Left.Minimum = 368D;
            // 
            // 
            // 
            this.picCTD.Axes.Left.Title.Caption = "采集值（NTU）";
            this.picCTD.Axes.Left.Title.Lines = new string[] {
        "采集值（NTU）"};
            this.picCTD.BackColor = System.Drawing.Color.Transparent;
            this.picCTD.ContextMenuStrip = this.contextMenuStrip1;
            this.picCTD.Dock = System.Windows.Forms.DockStyle.Fill;
            // 
            // 
            // 
            this.picCTD.Header.Alignment = System.Drawing.StringAlignment.Far;
            // 
            // 
            // 
            this.picCTD.Header.Font.Size = 10;
            this.picCTD.Header.Font.SizeFloat = 10F;
            this.picCTD.Header.Lines = new string[] {
        "CTD采集值曲线"};
            // 
            // 
            // 
            this.picCTD.Legend.CheckBoxes = true;
            // 
            // 
            // 
            this.picCTD.Legend.DividingLines.Color = System.Drawing.Color.FromArgb(((int)(((byte)(255)))), ((int)(((byte)(255)))), ((int)(((byte)(255)))));
            // 
            // 
            // 
            // 
            // 
            // 
            this.picCTD.Legend.Font.Brush.Color = System.Drawing.Color.Green;
            this.picCTD.Legend.FontSeriesColor = true;
            this.picCTD.Legend.HorizMargin = 4;
            this.picCTD.Legend.LegendStyle = Steema.TeeChart.LegendStyles.Series;
            this.picCTD.Legend.ResizeChart = false;
            // 
            // 
            // 
            this.picCTD.Legend.Shadow.Visible = false;
            // 
            // 
            // 
            // 
            // 
            // 
            // 
            // 
            // 
            this.picCTD.Legend.Symbol.Shadow.Brush.Color = System.Drawing.Color.FromArgb(((int)(((byte)(255)))), ((int)(((byte)(0)))), ((int)(((byte)(0)))));
            this.picCTD.Legend.Symbol.Shadow.Visible = true;
            this.picCTD.Legend.Symbol.Squared = true;
            this.picCTD.Legend.Symbol.Width = 10;
            this.picCTD.Legend.TextStyle = Steema.TeeChart.LegendTextStyles.Plain;
            this.picCTD.Legend.TextSymbolGap = 0;
            // 
            // 
            // 
            this.picCTD.Legend.Title.Lines = new string[] {
        "温度"};
            this.picCTD.Legend.TopLeftPos = 5;
            this.picCTD.Legend.Transparent = true;
            this.picCTD.Legend.VertSpacing = 4;
            this.picCTD.Location = new System.Drawing.Point(0, 0);
            this.picCTD.Name = "picCTD";
            // 
            // 
            // 
            // 
            // 
            // 
            this.picCTD.Panel.Brush.Color = System.Drawing.Color.Transparent;
            // 
            // 
            // 
            this.picCTD.Panel.Brush.Gradient.EndColor = System.Drawing.Color.FromArgb(((int)(((byte)(240)))), ((int)(((byte)(248)))), ((int)(((byte)(255)))));
            this.picCTD.Panel.Brush.Gradient.StartColor = System.Drawing.Color.FromArgb(((int)(((byte)(240)))), ((int)(((byte)(248)))), ((int)(((byte)(255)))));
            this.picCTD.Panel.Brush.Gradient.UseMiddle = false;
            this.picCTD.Series.Add(this.line3);
            this.picCTD.Series.Add(this.line9);
            this.picCTD.Series.Add(this.line10);
            this.picCTD.Series.Add(this.line11);
            this.picCTD.Size = new System.Drawing.Size(284, 423);
            this.picCTD.TabIndex = 0;
            // 
            // 
            // 
            this.picCTD.Walls.Visible = false;
            this.picCTD.DoubleClick += new System.EventHandler(this.picZD_DoubleClick);
            this.picCTD.MouseMove += new System.Windows.Forms.MouseEventHandler(this.picCTD_MouseMove);
            // 
            // contextMenuStrip1
            // 
            this.contextMenuStrip1.Items.AddRange(new System.Windows.Forms.ToolStripItem[] {
            this.显示电导率曲线ToolStripMenuItem,
            this.显示温度曲线ToolStripMenuItem,
            this.显示深度曲线ToolStripMenuItem,
            this.显示盐度曲线ToolStripMenuItem,
            this.全部显示ToolStripMenuItem,
            this.显示配置ToolStripMenuItem});
            this.contextMenuStrip1.Name = "contextMenuStrip1";
            this.contextMenuStrip1.Size = new System.Drawing.Size(161, 136);
            // 
            // 显示电导率曲线ToolStripMenuItem
            // 
            this.显示电导率曲线ToolStripMenuItem.Name = "显示电导率曲线ToolStripMenuItem";
            this.显示电导率曲线ToolStripMenuItem.Size = new System.Drawing.Size(160, 22);
            this.显示电导率曲线ToolStripMenuItem.Text = "显示电导率曲线";
            this.显示电导率曲线ToolStripMenuItem.Click += new System.EventHandler(this.显示电导率曲线ToolStripMenuItem_Click);
            // 
            // 显示温度曲线ToolStripMenuItem
            // 
            this.显示温度曲线ToolStripMenuItem.Name = "显示温度曲线ToolStripMenuItem";
            this.显示温度曲线ToolStripMenuItem.Size = new System.Drawing.Size(160, 22);
            this.显示温度曲线ToolStripMenuItem.Text = "显示温度曲线";
            this.显示温度曲线ToolStripMenuItem.Click += new System.EventHandler(this.显示温度曲线ToolStripMenuItem_Click);
            // 
            // 显示深度曲线ToolStripMenuItem
            // 
            this.显示深度曲线ToolStripMenuItem.Name = "显示深度曲线ToolStripMenuItem";
            this.显示深度曲线ToolStripMenuItem.Size = new System.Drawing.Size(160, 22);
            this.显示深度曲线ToolStripMenuItem.Text = "显示深度曲线";
            this.显示深度曲线ToolStripMenuItem.Click += new System.EventHandler(this.显示深度曲线ToolStripMenuItem_Click);
            // 
            // 显示盐度曲线ToolStripMenuItem
            // 
            this.显示盐度曲线ToolStripMenuItem.Name = "显示盐度曲线ToolStripMenuItem";
            this.显示盐度曲线ToolStripMenuItem.Size = new System.Drawing.Size(160, 22);
            this.显示盐度曲线ToolStripMenuItem.Text = "显示盐度曲线";
            this.显示盐度曲线ToolStripMenuItem.Click += new System.EventHandler(this.显示盐度曲线ToolStripMenuItem_Click);
            // 
            // 全部显示ToolStripMenuItem
            // 
            this.全部显示ToolStripMenuItem.Name = "全部显示ToolStripMenuItem";
            this.全部显示ToolStripMenuItem.Size = new System.Drawing.Size(160, 22);
            this.全部显示ToolStripMenuItem.Text = "全部显示";
            this.全部显示ToolStripMenuItem.Click += new System.EventHandler(this.全部显示ToolStripMenuItem_Click);
            // 
            // 显示配置ToolStripMenuItem
            // 
            this.显示配置ToolStripMenuItem.Name = "显示配置ToolStripMenuItem";
            this.显示配置ToolStripMenuItem.Size = new System.Drawing.Size(160, 22);
            this.显示配置ToolStripMenuItem.Text = "显示配置";
            this.显示配置ToolStripMenuItem.Click += new System.EventHandler(this.显示配置ToolStripMenuItem_Click);
            // 
            // line3
            // 
            // 
            // 
            // 
            this.line3.Brush.Color = System.Drawing.Color.Blue;
            this.line3.Color = System.Drawing.Color.Blue;
            this.line3.ColorEach = false;
            // 
            // 
            // 
            this.line3.LinePen.Color = System.Drawing.Color.FromArgb(((int)(((byte)(41)))), ((int)(((byte)(61)))), ((int)(((byte)(98)))));
            this.line3.LinePen.Width = 2;
            // 
            // 
            // 
            // 
            // 
            // 
            this.line3.Marks.Callout.ArrowHead = Steema.TeeChart.Styles.ArrowHeadStyles.None;
            this.line3.Marks.Callout.ArrowHeadSize = 8;
            // 
            // 
            // 
            this.line3.Marks.Callout.Brush.Color = System.Drawing.Color.Black;
            this.line3.Marks.Callout.Distance = 0;
            this.line3.Marks.Callout.Draw3D = false;
            this.line3.Marks.Callout.Length = 10;
            this.line3.Marks.Callout.Style = Steema.TeeChart.Styles.PointerStyles.Rectangle;
            // 
            // 
            // 
            // 
            // 
            // 
            // 
            // 
            // 
            this.line3.Marks.Symbol.Brush.Gradient.Visible = true;
            // 
            // 
            // 
            // 
            // 
            // 
            // 
            // 
            // 
            this.line3.Pointer.Brush.Gradient.Transparency = 100;
            this.line3.Pointer.Style = Steema.TeeChart.Styles.PointerStyles.Rectangle;
            this.line3.Title = "电导率(mS/cm)";
            // 
            // 
            // 
            this.line3.XValues.DataMember = "X";
            this.line3.XValues.Order = Steema.TeeChart.Styles.ValueListOrder.Ascending;
            // 
            // 
            // 
            this.line3.YValues.DataMember = "Y";
            // 
            // line9
            // 
            // 
            // 
            // 
            this.line9.Brush.Color = System.Drawing.Color.Red;
            this.line9.Color = System.Drawing.Color.Red;
            this.line9.ColorEach = false;
            // 
            // 
            // 
            this.line9.LinePen.Color = System.Drawing.Color.FromArgb(((int)(((byte)(146)))), ((int)(((byte)(94)))), ((int)(((byte)(32)))));
            this.line9.LinePen.Width = 2;
            // 
            // 
            // 
            // 
            // 
            // 
            this.line9.Marks.Callout.ArrowHead = Steema.TeeChart.Styles.ArrowHeadStyles.None;
            this.line9.Marks.Callout.ArrowHeadSize = 8;
            // 
            // 
            // 
            this.line9.Marks.Callout.Brush.Color = System.Drawing.Color.Black;
            this.line9.Marks.Callout.Distance = 0;
            this.line9.Marks.Callout.Draw3D = false;
            this.line9.Marks.Callout.Length = 10;
            this.line9.Marks.Callout.Style = Steema.TeeChart.Styles.PointerStyles.Rectangle;
            // 
            // 
            // 
            // 
            // 
            // 
            // 
            // 
            // 
            this.line9.Pointer.Brush.Gradient.Transparency = 100;
            this.line9.Pointer.Style = Steema.TeeChart.Styles.PointerStyles.Rectangle;
            this.line9.Title = "温度(℃)";
            // 
            // 
            // 
            this.line9.XValues.DataMember = "X";
            this.line9.XValues.Order = Steema.TeeChart.Styles.ValueListOrder.Ascending;
            // 
            // 
            // 
            this.line9.YValues.DataMember = "Y";
            // 
            // line10
            // 
            // 
            // 
            // 
            this.line10.Brush.Color = System.Drawing.Color.FromArgb(((int)(((byte)(68)))), ((int)(((byte)(102)))), ((int)(((byte)(163)))));
            this.line10.Color = System.Drawing.Color.Black;
            this.line10.ColorEach = false;
            // 
            // 
            // 
            this.line10.LinePen.Color = System.Drawing.Color.FromArgb(((int)(((byte)(41)))), ((int)(((byte)(61)))), ((int)(((byte)(98)))));
            this.line10.LinePen.Width = 2;
            // 
            // 
            // 
            // 
            // 
            // 
            this.line10.Marks.Callout.ArrowHead = Steema.TeeChart.Styles.ArrowHeadStyles.None;
            this.line10.Marks.Callout.ArrowHeadSize = 8;
            // 
            // 
            // 
            this.line10.Marks.Callout.Brush.Color = System.Drawing.Color.Black;
            this.line10.Marks.Callout.Distance = 0;
            this.line10.Marks.Callout.Draw3D = false;
            this.line10.Marks.Callout.Length = 10;
            this.line10.Marks.Callout.Style = Steema.TeeChart.Styles.PointerStyles.Rectangle;
            // 
            // 
            // 
            // 
            // 
            // 
            // 
            // 
            // 
            this.line10.Pointer.Brush.Gradient.Transparency = 100;
            this.line10.Pointer.Style = Steema.TeeChart.Styles.PointerStyles.Rectangle;
            this.line10.Title = "深度(m)";
            // 
            // 
            // 
            this.line10.XValues.DataMember = "X";
            this.line10.XValues.Order = Steema.TeeChart.Styles.ValueListOrder.Ascending;
            // 
            // 
            // 
            this.line10.YValues.DataMember = "Y";
            // 
            // line11
            // 
            // 
            // 
            // 
            this.line11.Brush.Color = System.Drawing.Color.Green;
            this.line11.Color = System.Drawing.Color.Green;
            this.line11.ColorEach = false;
            // 
            // 
            // 
            this.line11.LinePen.Color = System.Drawing.Color.FromArgb(((int)(((byte)(47)))), ((int)(((byte)(91)))), ((int)(((byte)(101)))));
            this.line11.LinePen.Width = 2;
            // 
            // 
            // 
            // 
            // 
            // 
            this.line11.Marks.Callout.ArrowHead = Steema.TeeChart.Styles.ArrowHeadStyles.None;
            this.line11.Marks.Callout.ArrowHeadSize = 8;
            // 
            // 
            // 
            this.line11.Marks.Callout.Brush.Color = System.Drawing.Color.Black;
            this.line11.Marks.Callout.Distance = 0;
            this.line11.Marks.Callout.Draw3D = false;
            this.line11.Marks.Callout.Length = 10;
            this.line11.Marks.Callout.Style = Steema.TeeChart.Styles.PointerStyles.Rectangle;
            // 
            // 
            // 
            // 
            // 
            // 
            // 
            // 
            // 
            this.line11.Pointer.Brush.Gradient.Transparency = 100;
            this.line11.Pointer.Style = Steema.TeeChart.Styles.PointerStyles.Rectangle;
            this.line11.Title = "盐度";
            // 
            // 
            // 
            this.line11.XValues.DataMember = "X";
            this.line11.XValues.Order = Steema.TeeChart.Styles.ValueListOrder.Ascending;
            // 
            // 
            // 
            this.line11.YValues.DataMember = "Y";
            // 
            // pnlCDOM
            // 
            this.pnlCDOM.Controls.Add(this.button22);
            this.pnlCDOM.Controls.Add(this.lblMultiB);
            this.pnlCDOM.Controls.Add(this.lblMulti);
            this.pnlCDOM.Controls.Add(this.picMultiPara);
            this.pnlCDOM.Dock = System.Windows.Forms.DockStyle.Fill;
            this.pnlCDOM.Location = new System.Drawing.Point(873, 113);
            this.pnlCDOM.Name = "pnlCDOM";
            this.pnlCDOM.Size = new System.Drawing.Size(285, 423);
            this.pnlCDOM.TabIndex = 7;
            // 
            // button22
            // 
            this.button22.FlatStyle = System.Windows.Forms.FlatStyle.Flat;
            this.button22.Font = new System.Drawing.Font("宋体", 10.5F, System.Drawing.FontStyle.Regular, System.Drawing.GraphicsUnit.Point, ((byte)(134)));
            this.button22.ForeColor = System.Drawing.Color.FromArgb(((int)(((byte)(0)))), ((int)(((byte)(192)))), ((int)(((byte)(192)))));
            this.button22.Location = new System.Drawing.Point(0, 0);
            this.button22.Name = "button22";
            this.button22.Size = new System.Drawing.Size(75, 25);
            this.button22.TabIndex = 5;
            this.button22.Text = "更改纵轴";
            this.button22.UseVisualStyleBackColor = true;
            this.button22.Click += new System.EventHandler(this.button22_Click);
            // 
            // lblMultiB
            // 
            this.lblMultiB.AutoSize = true;
            this.lblMultiB.Font = new System.Drawing.Font("Times New Roman", 15F);
            this.lblMultiB.Location = new System.Drawing.Point(127, 189);
            this.lblMultiB.Name = "lblMultiB";
            this.lblMultiB.Size = new System.Drawing.Size(88, 22);
            this.lblMultiB.TabIndex = 2;
            this.lblMultiB.Text = "lblMultiB";
            this.lblMultiB.Visible = false;
            // 
            // lblMulti
            // 
            this.lblMulti.AutoSize = true;
            this.lblMulti.Font = new System.Drawing.Font("Times New Roman", 10.5F);
            this.lblMulti.Location = new System.Drawing.Point(131, 113);
            this.lblMulti.Name = "lblMulti";
            this.lblMulti.Size = new System.Drawing.Size(50, 16);
            this.lblMulti.TabIndex = 1;
            this.lblMulti.Text = "lblMulti";
            this.lblMulti.Visible = false;
            // 
            // picMultiPara
            // 
            // 
            // 
            // 
            this.picMultiPara.Aspect.ZOffset = 0D;
            // 
            // 
            // 
            // 
            // 
            // 
            // 
            // 
            // 
            this.picMultiPara.Axes.Bottom.Title.Caption = "个数/个";
            this.picMultiPara.Axes.Bottom.Title.Lines = new string[] {
        "个数/个"};
            // 
            // 
            // 
            this.picMultiPara.Axes.Left.Automatic = false;
            this.picMultiPara.Axes.Left.AutomaticMaximum = false;
            this.picMultiPara.Axes.Left.AutomaticMinimum = false;
            this.picMultiPara.Axes.Left.Maximum = 300D;
            this.picMultiPara.Axes.Left.Minimum = -10D;
            // 
            // 
            // 
            this.picMultiPara.Axes.Left.Title.Caption = "采集值（μg/L）";
            this.picMultiPara.Axes.Left.Title.Lines = new string[] {
        "采集值（μg/L）"};
            this.picMultiPara.BackColor = System.Drawing.Color.Transparent;
            this.picMultiPara.Cursor = System.Windows.Forms.Cursors.Default;
            this.picMultiPara.Dock = System.Windows.Forms.DockStyle.Fill;
            // 
            // 
            // 
            this.picMultiPara.Header.Alignment = System.Drawing.StringAlignment.Far;
            // 
            // 
            // 
            this.picMultiPara.Header.Font.Size = 10;
            this.picMultiPara.Header.Font.SizeFloat = 10F;
            this.picMultiPara.Header.Lines = new string[] {
        "叶绿素浊度采集值曲线"};
            // 
            // 
            // 
            // 
            // 
            // 
            // 
            // 
            // 
            this.picMultiPara.Legend.Brush.Gradient.Transparency = 100;
            this.picMultiPara.Legend.CheckBoxes = true;
            // 
            // 
            // 
            // 
            // 
            // 
            this.picMultiPara.Legend.Font.Brush.Color = System.Drawing.Color.FromArgb(((int)(((byte)(0)))), ((int)(((byte)(128)))), ((int)(((byte)(0)))));
            this.picMultiPara.Legend.FontSeriesColor = true;
            this.picMultiPara.Legend.HorizMargin = 4;
            this.picMultiPara.Legend.ResizeChart = false;
            this.picMultiPara.Legend.TextSymbolGap = 0;
            // 
            // 
            // 
            this.picMultiPara.Legend.Title.Transparent = true;
            this.picMultiPara.Legend.TopLeftPos = 5;
            this.picMultiPara.Legend.Transparent = true;
            this.picMultiPara.Legend.VertSpacing = 4;
            this.picMultiPara.Location = new System.Drawing.Point(0, 0);
            this.picMultiPara.Name = "picMultiPara";
            // 
            // 
            // 
            // 
            // 
            // 
            this.picMultiPara.Panel.Brush.Color = System.Drawing.Color.Transparent;
            // 
            // 
            // 
            this.picMultiPara.Panel.Brush.Gradient.EndColor = System.Drawing.Color.FromArgb(((int)(((byte)(240)))), ((int)(((byte)(248)))), ((int)(((byte)(255)))));
            this.picMultiPara.Panel.Brush.Gradient.StartColor = System.Drawing.Color.FromArgb(((int)(((byte)(240)))), ((int)(((byte)(248)))), ((int)(((byte)(255)))));
            this.picMultiPara.Panel.Brush.Gradient.UseMiddle = false;
            this.picMultiPara.Series.Add(this.line4);
            this.picMultiPara.Series.Add(this.line5);
            this.picMultiPara.Series.Add(this.line6);
            this.picMultiPara.Size = new System.Drawing.Size(285, 423);
            this.picMultiPara.TabIndex = 0;
            // 
            // 
            // 
            this.picMultiPara.Walls.Visible = false;
            this.picMultiPara.DoubleClick += new System.EventHandler(this.picCDOM_DoubleClick);
            this.picMultiPara.MouseMove += new System.Windows.Forms.MouseEventHandler(this.picMultiPara_MouseMove);
            // 
            // line4
            // 
            // 
            // 
            // 
            this.line4.Brush.Color = System.Drawing.Color.Blue;
            this.line4.Color = System.Drawing.Color.Blue;
            this.line4.ColorEach = false;
            // 
            // 
            // 
            this.line4.LinePen.Color = System.Drawing.Color.FromArgb(((int)(((byte)(41)))), ((int)(((byte)(61)))), ((int)(((byte)(98)))));
            this.line4.LinePen.Width = 2;
            // 
            // 
            // 
            // 
            // 
            // 
            this.line4.Marks.Callout.ArrowHead = Steema.TeeChart.Styles.ArrowHeadStyles.None;
            this.line4.Marks.Callout.ArrowHeadSize = 8;
            // 
            // 
            // 
            this.line4.Marks.Callout.Brush.Color = System.Drawing.Color.Black;
            this.line4.Marks.Callout.Distance = 0;
            this.line4.Marks.Callout.Draw3D = false;
            this.line4.Marks.Callout.Length = 10;
            this.line4.Marks.Callout.Style = Steema.TeeChart.Styles.PointerStyles.Rectangle;
            // 
            // 
            // 
            // 
            // 
            // 
            // 
            // 
            // 
            this.line4.Pointer.Brush.Gradient.Transparency = 100;
            this.line4.Pointer.Style = Steema.TeeChart.Styles.PointerStyles.Rectangle;
            this.line4.Title = "叶绿素(μg/L)";
            // 
            // 
            // 
            this.line4.XValues.DataMember = "X";
            this.line4.XValues.Order = Steema.TeeChart.Styles.ValueListOrder.Ascending;
            // 
            // 
            // 
            this.line4.YValues.DataMember = "Y";
            // 
            // line5
            // 
            // 
            // 
            // 
            this.line5.Brush.Color = System.Drawing.Color.Red;
            this.line5.Color = System.Drawing.Color.Red;
            this.line5.ColorEach = false;
            // 
            // 
            // 
            this.line5.LinePen.Color = System.Drawing.Color.FromArgb(((int)(((byte)(41)))), ((int)(((byte)(61)))), ((int)(((byte)(98)))));
            this.line5.LinePen.Width = 2;
            // 
            // 
            // 
            // 
            // 
            // 
            this.line5.Marks.Callout.ArrowHead = Steema.TeeChart.Styles.ArrowHeadStyles.None;
            this.line5.Marks.Callout.ArrowHeadSize = 8;
            // 
            // 
            // 
            this.line5.Marks.Callout.Brush.Color = System.Drawing.Color.Black;
            this.line5.Marks.Callout.Distance = 0;
            this.line5.Marks.Callout.Draw3D = false;
            this.line5.Marks.Callout.Length = 10;
            this.line5.Marks.Callout.Style = Steema.TeeChart.Styles.PointerStyles.Rectangle;
            // 
            // 
            // 
            // 
            // 
            // 
            // 
            // 
            // 
            this.line5.Pointer.Brush.Gradient.Transparency = 100;
            this.line5.Pointer.Style = Steema.TeeChart.Styles.PointerStyles.Rectangle;
            this.line5.Title = "浊度(FTU)";
            // 
            // 
            // 
            this.line5.XValues.DataMember = "X";
            this.line5.XValues.Order = Steema.TeeChart.Styles.ValueListOrder.Ascending;
            // 
            // 
            // 
            this.line5.YValues.DataMember = "Y";
            // 
            // line6
            // 
            // 
            // 
            // 
            this.line6.Brush.Color = System.Drawing.Color.FromArgb(((int)(((byte)(0)))), ((int)(((byte)(128)))), ((int)(((byte)(0)))));
            // 
            // 
            // 
            this.line6.Gradient.EndColor = System.Drawing.Color.FromArgb(((int)(((byte)(180)))), ((int)(((byte)(194)))), ((int)(((byte)(219)))));
            this.line6.Gradient.MiddleColor = System.Drawing.Color.Empty;
            this.line6.Gradient.StartColor = System.Drawing.Color.FromArgb(((int)(((byte)(68)))), ((int)(((byte)(102)))), ((int)(((byte)(163)))));
            this.line6.Color = System.Drawing.Color.FromArgb(((int)(((byte)(0)))), ((int)(((byte)(128)))), ((int)(((byte)(0)))));
            this.line6.ColorEach = false;
            this.line6.ColorMember = "Colors";
            this.line6.Colors = ((Steema.TeeChart.Styles.ColorList)(resources.GetObject("line6.Colors")));
            // 
            // 
            // 
            this.line6.LinePen.Color = System.Drawing.Color.FromArgb(((int)(((byte)(41)))), ((int)(((byte)(61)))), ((int)(((byte)(98)))));
            this.line6.LinePen.Width = 2;
            // 
            // 
            // 
            // 
            // 
            // 
            this.line6.Marks.Callout.ArrowHead = Steema.TeeChart.Styles.ArrowHeadStyles.None;
            this.line6.Marks.Callout.ArrowHeadSize = 8;
            // 
            // 
            // 
            this.line6.Marks.Callout.Brush.Color = System.Drawing.Color.Black;
            this.line6.Marks.Callout.Distance = 0;
            this.line6.Marks.Callout.Draw3D = false;
            this.line6.Marks.Callout.Length = 10;
            this.line6.Marks.Callout.Style = Steema.TeeChart.Styles.PointerStyles.Rectangle;
            // 
            // 
            // 
            this.line6.Pointer.Style = Steema.TeeChart.Styles.PointerStyles.Rectangle;
            this.line6.Title = "温度(℃)";
            // 
            // 
            // 
            this.line6.XValues.DataMember = "X";
            this.line6.XValues.Order = Steema.TeeChart.Styles.ValueListOrder.Ascending;
            // 
            // 
            // 
            this.line6.YValues.DataMember = "Y";
            // 
            // pnlDO1
            // 
            this.pnlDO1.Controls.Add(this.groupBox9);
            this.pnlDO1.Dock = System.Windows.Forms.DockStyle.Fill;
            this.pnlDO1.Location = new System.Drawing.Point(3, 3);
            this.pnlDO1.Name = "pnlDO1";
            this.pnlDO1.Size = new System.Drawing.Size(284, 104);
            this.pnlDO1.TabIndex = 8;
            // 
            // groupBox9
            // 
            this.groupBox9.Controls.Add(this.txtDODate);
            this.groupBox9.Controls.Add(this.txtDOValue);
            this.groupBox9.Controls.Add(this.label33);
            this.groupBox9.Controls.Add(this.label15);
            this.groupBox9.Dock = System.Windows.Forms.DockStyle.Fill;
            this.groupBox9.ForeColor = System.Drawing.Color.Maroon;
            this.groupBox9.Location = new System.Drawing.Point(0, 0);
            this.groupBox9.Name = "groupBox9";
            this.groupBox9.Size = new System.Drawing.Size(284, 104);
            this.groupBox9.TabIndex = 0;
            this.groupBox9.TabStop = false;
            this.groupBox9.Text = "山仪所溶解氧";
            // 
            // txtDODate
            // 
            this.txtDODate.BackColor = System.Drawing.Color.AliceBlue;
            this.txtDODate.Font = new System.Drawing.Font("Times New Roman", 12F, System.Drawing.FontStyle.Regular, System.Drawing.GraphicsUnit.Point, ((byte)(0)));
            this.txtDODate.ForeColor = System.Drawing.Color.Blue;
            this.txtDODate.Location = new System.Drawing.Point(100, 70);
            this.txtDODate.Name = "txtDODate";
            this.txtDODate.Size = new System.Drawing.Size(178, 26);
            this.txtDODate.TabIndex = 3;
            this.txtDODate.TextAlign = System.Windows.Forms.HorizontalAlignment.Center;
            // 
            // txtDOValue
            // 
            this.txtDOValue.BackColor = System.Drawing.Color.AliceBlue;
            this.txtDOValue.Font = new System.Drawing.Font("Times New Roman", 12F);
            this.txtDOValue.ForeColor = System.Drawing.Color.Blue;
            this.txtDOValue.Location = new System.Drawing.Point(138, 30);
            this.txtDOValue.Name = "txtDOValue";
            this.txtDOValue.Size = new System.Drawing.Size(100, 26);
            this.txtDOValue.TabIndex = 2;
            this.txtDOValue.TextAlign = System.Windows.Forms.HorizontalAlignment.Center;
            // 
            // label33
            // 
            this.label33.AutoSize = true;
            this.label33.Font = new System.Drawing.Font("宋体", 12F, System.Drawing.FontStyle.Regular, System.Drawing.GraphicsUnit.Point, ((byte)(134)));
            this.label33.ForeColor = System.Drawing.Color.Black;
            this.label33.Location = new System.Drawing.Point(6, 73);
            this.label33.Name = "label33";
            this.label33.Size = new System.Drawing.Size(88, 16);
            this.label33.TabIndex = 1;
            this.label33.Text = "采集时间：";
            // 
            // label15
            // 
            this.label15.AutoSize = true;
            this.label15.Font = new System.Drawing.Font("Times New Roman", 12F);
            this.label15.ForeColor = System.Drawing.Color.Black;
            this.label15.Location = new System.Drawing.Point(6, 33);
            this.label15.Name = "label15";
            this.label15.Size = new System.Drawing.Size(123, 19);
            this.label15.TabIndex = 0;
            this.label15.Text = "sdioi-DO(mg/L)：";
            // 
            // pnlADL1
            // 
            this.pnlADL1.Controls.Add(this.groupBox10);
            this.pnlADL1.Dock = System.Windows.Forms.DockStyle.Fill;
            this.pnlADL1.Location = new System.Drawing.Point(293, 3);
            this.pnlADL1.Name = "pnlADL1";
            this.pnlADL1.Size = new System.Drawing.Size(284, 104);
            this.pnlADL1.TabIndex = 9;
            // 
            // groupBox10
            // 
            this.groupBox10.Controls.Add(this.txtADLDate);
            this.groupBox10.Controls.Add(this.txtADLValue);
            this.groupBox10.Controls.Add(this.label17);
            this.groupBox10.Controls.Add(this.label34);
            this.groupBox10.Dock = System.Windows.Forms.DockStyle.Fill;
            this.groupBox10.ForeColor = System.Drawing.Color.Maroon;
            this.groupBox10.Location = new System.Drawing.Point(0, 0);
            this.groupBox10.Name = "groupBox10";
            this.groupBox10.Size = new System.Drawing.Size(284, 104);
            this.groupBox10.TabIndex = 1;
            this.groupBox10.TabStop = false;
            this.groupBox10.Text = "PH";
            // 
            // txtADLDate
            // 
            this.txtADLDate.BackColor = System.Drawing.Color.AliceBlue;
            this.txtADLDate.ForeColor = System.Drawing.Color.Blue;
            this.txtADLDate.Location = new System.Drawing.Point(100, 70);
            this.txtADLDate.Name = "txtADLDate";
            this.txtADLDate.Size = new System.Drawing.Size(178, 29);
            this.txtADLDate.TabIndex = 5;
            this.txtADLDate.TextAlign = System.Windows.Forms.HorizontalAlignment.Center;
            // 
            // txtADLValue
            // 
            this.txtADLValue.BackColor = System.Drawing.Color.AliceBlue;
            this.txtADLValue.Font = new System.Drawing.Font("宋体", 12F, System.Drawing.FontStyle.Regular, System.Drawing.GraphicsUnit.Point, ((byte)(134)));
            this.txtADLValue.ForeColor = System.Drawing.Color.Blue;
            this.txtADLValue.Location = new System.Drawing.Point(136, 31);
            this.txtADLValue.Name = "txtADLValue";
            this.txtADLValue.Size = new System.Drawing.Size(100, 26);
            this.txtADLValue.TabIndex = 4;
            this.txtADLValue.TextAlign = System.Windows.Forms.HorizontalAlignment.Center;
            // 
            // label17
            // 
            this.label17.AutoSize = true;
            this.label17.Font = new System.Drawing.Font("宋体", 12F, System.Drawing.FontStyle.Regular, System.Drawing.GraphicsUnit.Point, ((byte)(134)));
            this.label17.ForeColor = System.Drawing.Color.Black;
            this.label17.Location = new System.Drawing.Point(7, 73);
            this.label17.Name = "label17";
            this.label17.Size = new System.Drawing.Size(88, 16);
            this.label17.TabIndex = 3;
            this.label17.Text = "采集时间：";
            // 
            // label34
            // 
            this.label34.AutoSize = true;
            this.label34.Font = new System.Drawing.Font("Times New Roman", 12F);
            this.label34.ForeColor = System.Drawing.Color.Black;
            this.label34.Location = new System.Drawing.Point(7, 33);
            this.label34.Name = "label34";
            this.label34.Size = new System.Drawing.Size(45, 19);
            this.label34.TabIndex = 2;
            this.label34.Text = "PH：";
            // 
            // pnlCTD1
            // 
            this.pnlCTD1.Controls.Add(this.groupBox12);
            this.pnlCTD1.Dock = System.Windows.Forms.DockStyle.Fill;
            this.pnlCTD1.Location = new System.Drawing.Point(583, 3);
            this.pnlCTD1.Name = "pnlCTD1";
            this.pnlCTD1.Size = new System.Drawing.Size(284, 104);
            this.pnlCTD1.TabIndex = 10;
            // 
            // groupBox12
            // 
            this.groupBox12.Controls.Add(this.txtCTD_Depth);
            this.groupBox12.Controls.Add(this.label96);
            this.groupBox12.Controls.Add(this.txtCTD_Temp);
            this.groupBox12.Controls.Add(this.label61);
            this.groupBox12.Controls.Add(this.txtCTDDate);
            this.groupBox12.Controls.Add(this.txtCTDValue);
            this.groupBox12.Controls.Add(this.label21);
            this.groupBox12.Controls.Add(this.label40);
            this.groupBox12.Dock = System.Windows.Forms.DockStyle.Fill;
            this.groupBox12.Font = new System.Drawing.Font("Times New Roman", 14.25F);
            this.groupBox12.ForeColor = System.Drawing.Color.Maroon;
            this.groupBox12.Location = new System.Drawing.Point(0, 0);
            this.groupBox12.Name = "groupBox12";
            this.groupBox12.Size = new System.Drawing.Size(284, 104);
            this.groupBox12.TabIndex = 2;
            this.groupBox12.TabStop = false;
            this.groupBox12.Text = "CTD";
            // 
            // txtCTD_Depth
            // 
            this.txtCTD_Depth.BackColor = System.Drawing.Color.AliceBlue;
            this.txtCTD_Depth.Font = new System.Drawing.Font("宋体", 12F, System.Drawing.FontStyle.Regular, System.Drawing.GraphicsUnit.Point, ((byte)(134)));
            this.txtCTD_Depth.ForeColor = System.Drawing.Color.Blue;
            this.txtCTD_Depth.Location = new System.Drawing.Point(237, 31);
            this.txtCTD_Depth.Name = "txtCTD_Depth";
            this.txtCTD_Depth.Size = new System.Drawing.Size(44, 26);
            this.txtCTD_Depth.TabIndex = 9;
            this.txtCTD_Depth.TextAlign = System.Windows.Forms.HorizontalAlignment.Center;
            // 
            // label96
            // 
            this.label96.AutoSize = true;
            this.label96.Font = new System.Drawing.Font("Times New Roman", 12F);
            this.label96.ForeColor = System.Drawing.Color.Black;
            this.label96.Location = new System.Drawing.Point(187, 33);
            this.label96.Name = "label96";
            this.label96.Size = new System.Drawing.Size(49, 19);
            this.label96.TabIndex = 8;
            this.label96.Text = "Depth:";
            // 
            // txtCTD_Temp
            // 
            this.txtCTD_Temp.BackColor = System.Drawing.Color.AliceBlue;
            this.txtCTD_Temp.Font = new System.Drawing.Font("宋体", 12F, System.Drawing.FontStyle.Regular, System.Drawing.GraphicsUnit.Point, ((byte)(134)));
            this.txtCTD_Temp.ForeColor = System.Drawing.Color.Blue;
            this.txtCTD_Temp.Location = new System.Drawing.Point(52, 31);
            this.txtCTD_Temp.Name = "txtCTD_Temp";
            this.txtCTD_Temp.Size = new System.Drawing.Size(44, 26);
            this.txtCTD_Temp.TabIndex = 7;
            this.txtCTD_Temp.TextAlign = System.Windows.Forms.HorizontalAlignment.Center;
            // 
            // label61
            // 
            this.label61.AutoSize = true;
            this.label61.Font = new System.Drawing.Font("Times New Roman", 12F);
            this.label61.ForeColor = System.Drawing.Color.Black;
            this.label61.Location = new System.Drawing.Point(3, 33);
            this.label61.Name = "label61";
            this.label61.Size = new System.Drawing.Size(46, 19);
            this.label61.TabIndex = 6;
            this.label61.Text = "Temp:";
            // 
            // txtCTDDate
            // 
            this.txtCTDDate.BackColor = System.Drawing.Color.AliceBlue;
            this.txtCTDDate.ForeColor = System.Drawing.Color.Blue;
            this.txtCTDDate.Location = new System.Drawing.Point(100, 70);
            this.txtCTDDate.Name = "txtCTDDate";
            this.txtCTDDate.Size = new System.Drawing.Size(178, 29);
            this.txtCTDDate.TabIndex = 5;
            this.txtCTDDate.TextAlign = System.Windows.Forms.HorizontalAlignment.Center;
            // 
            // txtCTDValue
            // 
            this.txtCTDValue.BackColor = System.Drawing.Color.AliceBlue;
            this.txtCTDValue.Font = new System.Drawing.Font("宋体", 12F, System.Drawing.FontStyle.Regular, System.Drawing.GraphicsUnit.Point, ((byte)(134)));
            this.txtCTDValue.ForeColor = System.Drawing.Color.Blue;
            this.txtCTDValue.Location = new System.Drawing.Point(141, 31);
            this.txtCTDValue.Name = "txtCTDValue";
            this.txtCTDValue.Size = new System.Drawing.Size(44, 26);
            this.txtCTDValue.TabIndex = 4;
            this.txtCTDValue.TextAlign = System.Windows.Forms.HorizontalAlignment.Center;
            // 
            // label21
            // 
            this.label21.AutoSize = true;
            this.label21.Font = new System.Drawing.Font("宋体", 12F, System.Drawing.FontStyle.Regular, System.Drawing.GraphicsUnit.Point, ((byte)(134)));
            this.label21.ForeColor = System.Drawing.Color.Black;
            this.label21.Location = new System.Drawing.Point(6, 73);
            this.label21.Name = "label21";
            this.label21.Size = new System.Drawing.Size(88, 16);
            this.label21.TabIndex = 3;
            this.label21.Text = "采集时间：";
            // 
            // label40
            // 
            this.label40.AutoSize = true;
            this.label40.Font = new System.Drawing.Font("Times New Roman", 12F);
            this.label40.ForeColor = System.Drawing.Color.Black;
            this.label40.Location = new System.Drawing.Point(94, 33);
            this.label40.Name = "label40";
            this.label40.Size = new System.Drawing.Size(45, 19);
            this.label40.TabIndex = 2;
            this.label40.Text = "Sality:";
            // 
            // pnlCDOM1
            // 
            this.pnlCDOM1.Controls.Add(this.groupBox15);
            this.pnlCDOM1.Dock = System.Windows.Forms.DockStyle.Fill;
            this.pnlCDOM1.Location = new System.Drawing.Point(873, 3);
            this.pnlCDOM1.Name = "pnlCDOM1";
            this.pnlCDOM1.Size = new System.Drawing.Size(285, 104);
            this.pnlCDOM1.TabIndex = 11;
            // 
            // groupBox15
            // 
            this.groupBox15.Controls.Add(this.txtM_Phy);
[truncated: 44,049 more chars]
