# Supplementary material
Source: MDPI journal article supplement (https://www.mdpi.com/2077-1312/10/8/1051)
Supplement: s1 [file s1 › OSNSystem/OSNSystem/OSNSystem/Main.resx]

<?xml version="1.0" encoding="utf-8"?>
<root>
  <!-- 
    Microsoft ResX Schema 
    
    Version 2.0
    
    The primary goals of this format is to allow a simple XML format 
    that is mostly human readable. The generation and parsing of the 
    various data types are done through the TypeConverter classes 
    associated with the data types.
    
    Example:
    
    ... ado.net/XML headers & schema ...
    <resheader name="resmimetype">text/microsoft-resx</resheader>
    <resheader name="version">2.0</resheader>
    <resheader name="reader">System.Resources.ResXResourceReader, System.Windows.Forms, ...</resheader>
    <resheader name="writer">System.Resources.ResXResourceWriter, System.Windows.Forms, ...</resheader>
    <data name="Name1"><value>this is my long string</value><comment>this is a comment</comment></data>
    <data name="Color1" type="System.Drawing.Color, System.Drawing">Blue</data>
    <data name="Bitmap1" mimetype="application/x-microsoft.net.object.binary.base64">
        <value>[base64 mime encoded serialized .NET Framework object]</value>
    </data>
    <data name="Icon1" type="System.Drawing.Icon, System.Drawing" mimetype="application/x-microsoft.net.object.bytearray.base64">
        <value>[base64 mime encoded string representing a byte array form of the .NET Framework object]</value>
        <comment>This is a comment</comment>
    </data>
                
    There are any number of "resheader" rows that contain simple 
    name/value pairs.
    
    Each data row contains a name, and value. The row also contains a 
    type or mimetype. Type corresponds to a .NET class that support 
    text/value conversion through the TypeConverter architecture. 
    Classes that don't support this are serialized and stored with the 
    mimetype set.
    
    The mimetype is used for serialized objects, and tells the 
    ResXResourceReader how to depersist the object. This is currently not 
    extensible. For a given mimetype the value must be set accordingly:
    
    Note - application/x-microsoft.net.object.binary.base64 is the format 
    that the ResXResourceWriter will generate, however the reader can 
    read any of the formats listed below.
    
    mimetype: application/x-microsoft.net.object.binary.base64
    value   : The object must be serialized with 
            : System.Runtime.Serialization.Formatters.Binary.BinaryFormatter
            : and then encoded with base64 encoding.
    
    mimetype: application/x-microsoft.net.object.soap.base64
    value   : The object must be serialized with 
            : System.Runtime.Serialization.Formatters.Soap.SoapFormatter
            : and then encoded with base64 encoding.

    mimetype: application/x-microsoft.net.object.bytearray.base64
    value   : The object must be serialized into a byte array 
            : using a System.ComponentModel.TypeConverter
            : and then encoded with base64 encoding.
    -->
  <xsd:schema id="root" xmlns="" xmlns:xsd="http://www.w3.org/2001/XMLSchema" xmlns:msdata="urn:schemas-microsoft-com:xml-msdata">
    <xsd:import namespace="http://www.w3.org/XML/1998/namespace" />
    <xsd:element name="root" msdata:IsDataSet="true">
      <xsd:complexType>
        <xsd:choice maxOccurs="unbounded">
          <xsd:element name="metadata">
            <xsd:complexType>
              <xsd:sequence>
                <xsd:element name="value" type="xsd:string" minOccurs="0" />
              </xsd:sequence>
              <xsd:attribute name="name" use="required" type="xsd:string" />
              <xsd:attribute name="type" type="xsd:string" />
              <xsd:attribute name="mimetype" type="xsd:string" />
              <xsd:attribute ref="xml:space" />
            </xsd:complexType>
          </xsd:element>
          <xsd:element name="assembly">
            <xsd:complexType>
              <xsd:attribute name="alias" type="xsd:string" />
              <xsd:attribute name="name" type="xsd:string" />
            </xsd:complexType>
          </xsd:element>
          <xsd:element name="data">
            <xsd:complexType>
              <xsd:sequence>
                <xsd:element name="value" type="xsd:string" minOccurs="0" msdata:Ordinal="1" />
                <xsd:element name="comment" type="xsd:string" minOccurs="0" msdata:Ordinal="2" />
              </xsd:sequence>
              <xsd:attribute name="name" type="xsd:string" use="required" msdata:Ordinal="1" />
              <xsd:attribute name="type" type="xsd:string" msdata:Ordinal="3" />
              <xsd:attribute name="mimetype" type="xsd:string" msdata:Ordinal="4" />
              <xsd:attribute ref="xml:space" />
            </xsd:complexType>
          </xsd:element>
          <xsd:element name="resheader">
            <xsd:complexType>
              <xsd:sequence>
                <xsd:element name="value" type="xsd:string" minOccurs="0" msdata:Ordinal="1" />
              </xsd:sequence>
              <xsd:attribute name="name" type="xsd:string" use="required" />
            </xsd:complexType>
          </xsd:element>
        </xsd:choice>
      </xsd:complexType>
    </xsd:element>
  </xsd:schema>
  <resheader name="resmimetype">
    <value>text/microsoft-resx</value>
  </resheader>
  <resheader name="version">
    <value>2.0</value>
  </resheader>
  <resheader name="reader">
    <value>System.Resources.ResXResourceReader, System.Windows.Forms, Version=4.0.0.0, Culture=neutral, PublicKeyToken=b77a5c561934e089</value>
  </resheader>
  <resheader name="writer">
    <value>System.Resources.ResXResourceWriter, System.Windows.Forms, Version=4.0.0.0, Culture=neutral, PublicKeyToken=b77a5c561934e089</value>
  </resheader>
  <metadata name="statusStrip1.TrayLocation" type="System.Drawing.Point, System.Drawing, Version=4.0.0.0, Culture=neutral, PublicKeyToken=b03f5f7f11d50a3a">
    <value>112, 17</value>
  </metadata>
  <assembly alias="System.Drawing" name="System.Drawing, Version=4.0.0.0, Culture=neutral, PublicKeyToken=b03f5f7f11d50a3a" />
  <data name="pictureBox1.Image" type="System.Drawing.Bitmap, System.Drawing" mimetype="application/x-microsoft.net.object.bytearray.base64">
    <value>
        /9j/4AAQSkZJRgABAQEASABIAAD/4QAwRXhpZgAATU0AKgAAAAgAAQExAAIAAAAOAAAAGgAAAAB3d3cu
        bWVpdHUuY29tAP/bAEMAAwICAwICAwMDAwQDAwQFCAUFBAQFCgcHBggMCgwMCwoLCw0OEhANDhEOCwsQ
        FhARExQVFRUMDxcYFhQYEhQVFP/bAEMBAwQEBQQFCQUFCRQNCw0UFBQUFBQUFBQUFBQUFBQUFBQUFBQU
        FBQUFBQUFBQUFBQUFBQUFBQUFBQUFBQUFBQUFP/AABEIAH8GpAMBEQACEQEDEQH/xAAfAAABBQEBAQEB
        AQAAAAAAAAAAAQIDBAUGBwgJCgv/xAC1EAACAQMDAgQDBQUEBAAAAX0BAgMABBEFEiExQQYTUWEHInEU
        MoGRoQgjQrHBFVLR8CQzYnKCCQoWFxgZGiUmJygpKjQ1Njc4OTpDREVGR0hJSlNUVVZXWFlaY2RlZmdo
        aWpzdHV2d3h5eoOEhYaHiImKkpOUlZaXmJmaoqOkpaanqKmqsrO0tba3uLm6wsPExcbHyMnK0tPU1dbX
        2Nna4eLj5OXm5+jp6vHy8/T19vf4+fr/xAAfAQADAQEBAQEBAQEBAAAAAAAAAQIDBAUGBwgJCgv/xAC1
        EQACAQIEBAMEBwUEBAABAncAAQIDEQQFITEGEkFRB2FxEyIygQgUQpGhscEJIzNS8BVictEKFiQ04SXx
        FxgZGiYnKCkqNTY3ODk6Q0RFRkdISUpTVFVWV1hZWmNkZWZnaGlqc3R1dnd4eXqCg4SFhoeIiYqSk5SV
        lpeYmZqio6Slpqeoqaqys7S1tre4ubrCw8TFxsfIycrS09TV1tfY2dri4+Tl5ufo6ery8/T19vf4+fr/
        2gAMAwEAAhEDEQA/AOCuP9fJz/Ea/bT+eHuyrubbuxx60CHB9n8G6gBI/l60m1FXZUYynJRirtnpngD9
        nbx98TTHcaZ4flSwfpe3h8iEj1Bb73/AQa+fxXEGEoPlp3m/Lb79j7XCcJY6slPEtUl/e+L/AMBWv32P
        dPD/APwT31CbbJrviyC2bHMVhbNL/wCPMV/lXz1XiTFSf7uEYrzu/wDI+lpcKZbTt7Sc5vytFfqzqz/w
        T38JPgv4l1iNwOREsQU/gyk/rXjPNs1bv9Ya/wC3Y/5M+ljluQQio/2fF+bnVv8AhNL8Cnqn/BPTRJbf
        bpviq8t3AOHuLdZNx98MP0FdNDPcxo/HUU/VJf8ApNjz8XkWS4q3s8O6X+Gbf/pfN+Z5T40/YQ8eeHon
        n0eey8RRLk7IJPKlP/AXwPwBNe7Q4n1tiKVvOLv+DPnsRwdRmr4PEa9pq34q/wCKR4B4j8Maz4R1CSx1
        rTbnTbtDzFcxFG/WvqsJmGGxqvQmm+3X7j4jH5Pjssf+002k9nvF+jWhl16J4wgkLNsHK0AN2n3oAcGD
        dDmgBrglSw+63f8Au0APMyr1WgBfKO7fu4/u0AR4FACqjOu5hhfWgB7zSSHyTIHPotADpIniGx1Kn+8a
        AG7Tt3Y4oAjKleuRQAfiaAGhg0mQcp/doAHYPHhTk0ARlgvU4oNQDBuhzQAtABQBV+f0oAt4NADPMX1F
        ADqAINw27s/NQAss/wAuzZ/wKgBhcBtpTC+tADPLP9+gALAdTQbDQNg2fe/2qAGiQj/V/L/vUAJu5xs5
        oAavB/v0AIjAR4J5oAdtPpQA3cPWgCTeucbuaAAMx++MfWgB2Pc0AP8A4tv8XpQAueNnf+9QYiUALLwm
        E5PpQA0sB1NADJHY9GWg2F3/AC528UARrcNFFJ79KAGqwb7xxigBlxAIp9u/C0GpDJz0oAi3N6UARtEV
        XJbEnr2oAPJbO3d8uOtACLGU6NQAoCGfaD8vrQakYtw0mQ+RQA+NgOpoMhfn9DQBIImYZZsCgCfy2hJG
        MFetADthlbaG2rQZE3Q470AS49zQA8EN05oAWX950+WgBD8vXigBdp9KDEFUu2FGT6UASFgG25+X1oAV
        vlYq3CqNyn1NAC4X1FACGBx1OKAF2nZjHNAElAFSgCwIgnX5qAIP7v8AtfeoANp25xxQAu1eP9r73tQB
        LEfk3bPl9aAE/wBv+H0oAWNSOooAXyh5eO9AC+YvqKAI4yB1oAX+Fv8AnmOo70ANEOOg2f7lADF+Zt45
        H92gAk5fYOW9KAA/L14oAI+I8HrQAsikruA49aAEPy9eKAI5FJ6CgCDb+7xv5oNhsr+ZHgLtNACGVR1W
        gA/i2/wUARUGom4YjTuOrUAO2kyYA/fevagyHxsB1NACjccYB56e9ADxsRtxBYf3aAJdw8zOeKAHxzY7
        4oAd3x3oMQoAWPhsHg0AWAwZQQeE6/7VAAJdvVlagyF7uO6dBQAvmDEZ28DrQajpJFaVsHOOtADBMSMi
        PigyFoAKACgAYFZMr0oACqq2CeaAEiIjGSdwrEBC7UAOZSPKyMbOv+1WwEiBR1DCgB54GScDpS2KjFya
        jFXZ6v4Z/Zz8RX+gL4l8U3ln8PvCe5VOq6+TGz7jhfLh+8xPbdtB7Zrw6+b0YT9lQTqT7L/M+vwXDVes
        lPEPkX4/8D+tD1j4a/Cr4LarZeIjpx1vx7q2iW7XBOoLLa2FyAwX915K5YHPH3umelfP4vHZhHl5rQUu
        1m163/4B9jhsjy+gtIczXV6/8D8B/wABvi74M8UfEH/hEm+FvhLRpPKuxGba1S4keaIFkTzWG0fKOWJx
        nuKWOwuIpUfbqtKS08t/I9ijGlD3YQS9EaPgz4rS+IvjToHg+60fwPqGh3sSzyT/ANmRKzLyhjBG5d+4
        Z4yDjA61jVw3s8JLEKU1JO2/9M1T9/lsV9Qv/A/jTx7PpGofBfRbazn1RtNsI7b/AELUpwsphZ1EWA2G
        VnPI2pjPJq0sTRpKpDENu131S0v1+71OepQoVtKlNP5HJ/FP4F/CfSfGut+HtC8b3/hTUNMiSSRtfi+0
        aYzN0jWcYdSOhzuxg+ld2EzLGypRq1Kamn20l9x4GK4dwNa6p+4/LY8c+JXwf8X/AAmliPiXR2g06bH2
        fWLJ/PsZweVKygfLkdAwU+1e9hcfh8X/AApa9no/uPicfkeKwN525o91+pyC/NkD5SOuztXqnzowKT0F
        ADZGA+4c/Sg1FLgAkrwv3aAE/gx3oMhYlJdiwxv6E/w0APDCPvuoAXI9aAJEYA4Y7jWIFoyxyxTZx8v3
        fegCCONgcY5rYCSSRtu3A/3qAGZj/edeelABuO3djj1oAm3D1oM7ke07MY5oC5KJAY8BeaxNBPk8rORv
        9KAAkL14rYAX5o8NwfSgA3D1rEzuHkt5md1AXCLrn/lp69qDQB8zbW4NAAFJkyBxQA6CILJk8D3oAbJz
        0oAWJwVwF/d+negA2Hy8YoAQ/L1oARmaT7o3UASkhRknA9aAGUAN77/4fWgBMBANr7d33t3agB+E9aAI
        pXGM7OKAGRowXcRhfWgBo5Zn/iX7tbAJIwLgjo33qAIpHkK7gp/3KAFyPWgCKSIlQwb5j0HrQajfMNAC
        +YvqKAGh9k5bbv3/AMP92gCCgB21fWgCPYKAEkRdu7PHrQBAV2naXwvrQbD4kUttbhaAGSQ7lLAfKv3T
        QajPLi96AJZAh75oMhDcbeqYoASNgOpoAmh+ZvOHKelAAWEnfbQA8SE9MUAKOelBiLtT1oAfvXdtz8tY
        gSbKAE2ndtx8tAEDMLfvuoABycDr6UGxHKF9GoAjwmd2eP7tBqRHiPmgB4kXA57UAdVcM0txICNh3Gg4
        Huxnf/pn60COo+Hvw21/4n+IItH8P2LXVy2DJJ0jhXu7t0ArzMfmFHAQ5qmrey6s93KsnxGazap+7Bby
        ey/zfZI+8vhB+yN4P+GEEWpaykXiHXI13vdXij7PCf8AYQ8cf3m5+lfmuNzCvj3+9do9lt/wfmfr2X4D
        DZXHkwkfe6yfxP07LyX3s9C1/wCKlha+A9R8TeH0j16106byZo4nMYTawVz0J+UHOAOR0ryJVkoOUdbH
        v0sBUniI0K3uuWqv17fecdp/xg1G4+Imm2s90q6Wbg2F3bG38nbLIu6F13nzGXPG4qqnPFc3t37VK+m3
        +R7H9mQeEnJRfMlzRd90naS00+V7mT8ZPHmq6J41sdH1DVf7PgnvYrrSv7MVC6rEhZxcu8iBVbnIwQR0
        OazxNWUZqDdr7W/XU68pwNHEYadenDmcYtS5r9XZcqSeqOsHjjxVb/AqfxOY7LU9ee2kuIfs22GCNCTt
        kYsxBCL8x55xgda39pUWHdR6s8xYPCSzVYVtxp3Sd9X6Ky3b0WmhhfB34ya74t1jTrbU40m07VI5Gsp5
        YDbXHlxIv790PDCZizKF+6AM1jhsROq1zLR7dNuvzO7N8qw2EhJ0n70LcyvdXbeif91WTvuzvvE+keCP
        irLqnhfV4LHWrqxCC5tXx51tvXcpDDlSRzkGvQjNc/uO0o9t0fNunXo0VOcf3dS+6vGVtHo9D4r/AGg/
        2NNU+HsVxrvhJpdZ0BMvLbMM3FqvXJx95R6jp3Hevtsu4glBqljdV0l/8l/mfBZpwvSxadbLFyz6w6P/
        AAPv/dfyfQ+ZGUxyHA6dq++TUldbH5VKMoScZKzQ0kjqKokCwk77aAJEsfMTKhmk9QeKAALKv3MD/eoA
        WR2m+6MUARkhTgmgBNr7dmTtoAGIjTaD+89aAFmmbzMs+4UAP8w53f8ALT+92oAiVfM6yUAOPy9TigBT
        IF+6maB2ZC/7vpQFmMClvvDH1pXRoBUr90Z+lF0A7zF9RSugHUXQFTL+lUA4OWOA+TQA2gCyJFLKARlu
        g9aAKzfI208N6UroCVJk7DfRdARyHPTmmOzG7hjPagdmMkoNBcfLnPHrQBDuHrQAhkKyZPAoAc3yyZXk
        UAMEbHoKAF800ANEjH+A0ASmMB8npQBK8bN0GaAAqV65FADtw3bf/HqACgzswHzdOaBWYUCI5KAH+V09
        +lBsMPynB+560AVpOUwOTQOzE3D91z9zr/tUBZgyfLsZ8/7VBoR98d6AGMuwZbIqbodmQeYYhk/MKLoL
        MTA/vmi6CzH0XQWZCnAwf9X/AHe9F0aEhYD7hzRdAM2n0oujOxYyNu7PHrRdBYIU2MDu3SHo3ai6EX7m
        DAjO/Dydqd0BHtMnQbaZnZkkXMmX4HrQFmTYNTdCJDIH/h20XQDf4sd6LoBR+7xn5s0XQDTGV6viqMSV
        mAXaTuP95aAHRv5ZwV3UroBWUv1FF0BX8s/36LoCaRJD0OaLoCXcM4zzSugFougGbj/cNF0AvmL6indA
        V9p9KYEgYMdwOR/doAfspXQEaSELk/8AfFK6AftO7bj5Kd0A8MGbAPNF0BH5Lf3hRdARBS3QUXQD/tLe
        1F0Au4eaJM8N95fSi6Ak8xfWi6AgKl+g20XQCfwZz8v93+KmAJ+860AGDnGOfSgdmIXYNtIIX1oHZgrB
        /vcUCsyIpjqaAsxnnLz8vSg1IsfLu7etAEUnPSgdmG9vQUBZi7Ttzjj1oNCLafMzjigB8chDbT/33QZ2
        Ybhtznj1oCzJY2YZyD8v3fegQtAEtAC7T6UAT7ht3fxUGdmFAWY7B27cf8CoJHxsA+Sef7lAD9x/uGgz
        sx3YL3T+L+9QFmGP3eO9BoKqK6hlOWb7woAVI2VNpGD6UGQbTt3Y49aAEoHZiBgehoCzEOwdQRU3Qhf9
        X+7PzH1ougH+SPLx3rMBsSGPqN1AEifvPvVpdAa3hbwtqvjXXrTRdEtJb/UrptscMf6sx6KoHJJ4FYVs
        RSw8HUqOyR2YTCVcbVVGirt/h5s+r/A/wk0L4ZeBPFWp6FJa+MPitoCo0kLxB4bbcAS1sHIDYG4ed82C
        p44wfiMVj6uMqwjP3KMvx9f8j9Zy3KKGXRvH3qnf/Lsc38Ibrx1+0RZ/E3wjri3Wo2k8CXsJ1GREijuM
        AwTwkYZgzQ7TtwnLEY6VeLjh8v8AY16dk9tO3VP7/U9iLlO6Z2Hh34U2Xwp8UTalrfj6SLUL60Fle6Pp
        sX2y7miaL5lQjIgfeduVByqDnms+atjqVqVH3U7qTdkv8zzMTmeEwUuSpUvLstX9yOi0n4b+G7PxJp2v
        eFfgprU91Z2slrFcajdC1ilWRAjuyMxyxUYzgdTxzRNy9m6WJxkUm9kr7eh5/wDamJqNPDYKb85NR/M6
        qyg8S6DrNpq9p8D9MS+srNbGBrbVoDJFArblULjqCOvX3rmdPBzi6bxrs3fWLtcPr+bRd3gfumrnC21j
        4S8F+LtO8Va/4J8eeDdW0+8kuodU3NfW0KynM8IxuCxyE5b5c8DBFdrw9fEUpUcNXp1E1t8LdtnrbVdN
        SP7dVB3xmGnT87XX3o8xtv2X7z4o+Lbe+0DxJoHjTSb/AF/+1NR1f7S4u7aDJPkSRM2SvYDDHOM8V0VM
        dLAw5K1OUGo2Sto33TPZw2Jw2OXPh6ikvx+aOw1X4xeJvFnxautH0fUk8QWl41xZ6b4JfTwYmtIXjjb7
        Uh4j34dvNf7qbcLk1wxwlOlhlUkuVqzc79XfbvbsuvU7nJuVjif2gP2aNF0rXdRk+Gd9Bc6jbQLd6j4M
        jmMk0CMCS9mx5kUYOY+SAOP7tenlubTcVHFrR6KX+fb1PkM2yCFdOrhNJ9ujPmeK5FwgYESA90r666Pz
        SdOdOTjNWaLdrFG37xiA39yndDIJP3cny/PH6ii6AiO9eoIoujOxL5Z/v0roLMU8UXQiTzR6UXAUKTLw
        M1mBYjlWCOQbd2elACCQrJmLj61sBG7M828DI/u0ATbVi6Hf9KV0An8W3+Ci6AQMG6Gi6IJlYP8AdOaV
        0AR8dazLF2jbnPHrQAiuz/eZRWl0A7afSi6AQKpOATmsyLD94zjcaAIo2AAJPXpQWOiUxruILN6UANjZ
        g2CMH0oAC7L14oAd0oAbIwi74oANzelADgpH3Bj/AHqAET5v9igAHyHb95aAAc9KAAfMu4c/7NAA8qno
        tAB/DntQBC7Ax4B5oAi+bb979569qAHJ8nXitLoCOZS33xu/3ad0A0kjqKV0Ayi6AQRFs4b7v3fendGo
        u0etK6Ab5DcfL16U7oBnbb/B/d70XQERUjqKYCUAFAEcnJwPuetADRFv+9xQbDaAGlQq7C+BQajgqnPP
        TrQACZWGQuRQZ2YoRX+8cUBZibVBxnn0pXQWY9nXflW2p6UroLMbtPpRdCHRsB1NO6AniFF0Z2YKqt0x
        SuhWYvljj36e9ZhZk3mLnGeaAsxdwzjPNAiCUlPupt/3qAGx8JtPH+1QbEYUquUG0erUARmQDqlBqRTK
        Vi5GKAIRmgDs7n5ZpFPB3H5qDge7N/4e+ANW+JvjCy8OaLD5l1ct8zsDshQfedz2UCvMzHHwy+j7SWre
        y7v+tz3smymebYj2d+WEdZS7L/N7JH6b/Cn4W+H/AIK+EYtJ0/yw23zLq+mwJLmTHLsew9B0Ar8qr1ql
        eo6tV3k/608j9op04UqcaGHjywjokvzfdvqzhvivrqeItE0vxv4d1z+0/C9s722pQQDzoY1LbftPlnG5
        4mAJVvl2kkg4FeRXnzRVanK8Vv8A5/I+wyzDqlVngMTTtVdnG+jfXlv0Uls1rc8z8E+LtS8KeIdXh8Uw
        GPS7xl0jxBcxOZrffIuLe88zO3c28KwXgAjA+WuClUnCT9otHpLt5M+lxeFo4qlB4R+9H36aejsvihbs
        rXTf6k1n8LvEHiPT9SuEhuLLXNOhOk+ewW1tZpLd/wBzPJK5zISoXlFPfmmsPKcXLaS08tNncieaYfDV
        IRupU5Pnt8TSmveiktte7+RvfF7wxoXxB1PQLnVvFuhQ3SzwHUITqCr9lVU/eGPrvbdwB8oHU5rbEQp1
        3Fymrq19TgyfEYnL4Vo0aE2mny+69ddL9tN932Ol1fRNU8d+CdN8Px6ppfjKWON4nkjvlgsnPIiknRcy
        SFRtOwDaSOa2lGVWmqd1J+unlc8yjWp4HGSxEoSpLR2teXmot2SvrrukYnwu1qb4bfC/WbmSxvbrx/Nc
        yx6jFqCGC1juIl2+aMYSK1VADuXqOOWNY4eToUHLXnvrfa6/BI9HNKMMxzGnTjJLDpLl5dZcrd7d5Tb0
        s+vkeZfDu38W+JfFr6Tpd02lalqBN7Nq10mLlGYgtcBc5LMM4AJQKYwy5rjoKtObjB2b1u9/6Z9DmTwO
        HoKvWXNGPuqK20+zfsuvVu7TPsG98X6L4em0/TtV1e3huLr9xC91IqfaJFADKD0399vvX0MpxhaMnufl
        FPD16/PUowbUdXbWy7+nmfHv7X/7L8OjpceOPCdr5dmTv1GwhXiEn/lqgHRT3HY+3T6vJc1eDksPWf7t
        7f3X/l+R8rnuTRzek8TQX+0RV3/fS/8Abl/5MvM+PJPbmv0w/Fxm0+lMB4lbZtV9p9KAG5PPz9OtADCj
        v3K0ASiQJFsK7j/eoAh2SepoAdJzJkdKAAKU7bqAG7m9KAFPP3/m/wB2gCQMI++6gCEyEHB60Go6Tnpz
        QAnmL6isQHUAVvKb0NADsfNt3jNAEmytgISqo+VORQA2gCeMlY2kKHL/APjtAEjOkcO+EBpf7prECC5i
        8v74z/u0AVst6VsbDtpxsx83pQBDMzL1FACeYd23+H1oAbtPpQAg+Tr81ACbm9DQBJHIR14oAj3Ad6AJ
        ZWAxsOc9MUAAQj+LZ/uUAPjJHVqAJgQn+1QA7zB/coAbkUAOKl+g20ANoMRkik9BQA0o65ySNv3feg2I
        5GYwqQOD0NAEZ+XGe/Sg1HeWJevyfWgBs1tDB0ctQBV3N5mcGgA2edNkNmT17Vialx9Eu0tFupUKI3Td
        3oAy9pzjHNAEpUgcigCGgAPzttHyt6UASjnpQAm4btufloAmjUhiMcr90UGRcaQyRLGeqdGoAjiQ/wB6
        tgJhycDrQA7AxnfxWJkTUALn5d38VADmRgI8jGOtAEe9YupDVsYi0AG9vMz2rECz5ijvQBXA3dKALHmL
        nGeaAItw35zxQBPQBX84etADdp9KAGmQr1rYBx+fp8tAFjzF9RWIFfD/APPRaALHmL6igBpUsuxxuP8A
        eWgB3mL6igCIyK332Df7tADQikZByKAGjlcjpQA7ym9DQA0MzdBmgBQpPQZrYBSpP3xn/doAb5hxs7/3
        qDYWb5evFADNp96AGzfL14oArlT8/HXpQA3zpM7crtoAjoNQoAh2vnbu+X1oAlyKAGY9zQAD5m3D/vmg
        B/mHOOM0GRKGDdDmgA8s/wB+gCUl16jFAEuR60AShSegoATc3oKDEdtO3Zjn+9QBYLBepoAWgBdp257e
        tACKpTO0dOtADZQwkzu4oMiXeM788f3aAGUGoBxH95MfWgA3+X1XdWJkIv7xN560AJ5a+poAA7HpQBd0
        qxudW1C2sbOF7q8uZVhhgiGWkdjhVA9STUTnGnFzk7JG1GjPEVI0qau2fUPhm3+Hnwt0zVfhr4g1iLTN
        V1qy8jXvFAuTE1nKzhY7aEYBeIMQGdWCnD5Ixx8ZWqYrGTWKpRuov3Y737t+fl6H7Jl2X0cuo+yXxPd+
        f+R1vwe+Amu+HNRbxL8QteazTwvPu0bULdYnttQs3LK3mqp2sZEUfIAAC4YZNcmIxcK/7jCQvz7rqn5e
        j69j0KlSGGg61eVkup7HqFxdeLbO+1m6lTwH4NWJfNmhjEd9ewpwgZgMonOFHXnArnUaWCahFe1q/wDk
        sX+r/A8K+KzX3m3So/8Ak0l+iLeg2FvB4P8AFNt4L8OXfhHX7W3c2N/q9hue6coSknzHLAsMEEgj0rjr
        16tarCWJnzx6pPReXkevhcFhcHG1CCT79X89zyfXfG3iZ/2ZNK+M+heMNTi8SafaRXt9pl48b2N6yyCO
        4tWiCjaSwYKVIIOOtejTw9JY6WBqQXK3ZPqtLp/5nW5+7zJl/V/Gdz4Y+NPxQ8VafYtNqlv8PLbV7fTX
        YttmHmHGzseACQMkCohQjVwtGjJ2XtGr/cHNaTfkTa1qGofDv9lFfiRceKL/AFHxmmmW+tSX81yzQXU8
        u0/ZhDny/LYv5YQLkcc5qYUoYjMPqyglC7jbsl1vv5jcrQuJ408P+HfGfxY8NaJomhz+HfGN1oo1rUdf
        8Pzi2l0cHAj89OFlDuWGw/MdpPSunDYvEYfDzlUkp01LlUZaqXe3VWXU8LF5RhMRNVKS9nU35o6fetmW
        o/E9z4Q8Y6Rpfxas7ePUlMsGg+P9MzBBO8qbCk+3/VyEY4YFSQDjpSqYWGJoyq5c3b7VN6tW6ruvxMKO
        YV8HUjh8y6/DNbP17M8Lk/Z117wP8Xx4r8X+ITp8GhQrrF74gs5SFffJIP8ARFEYzKQqhlIO7cf71dn9
        oU62G9hQjrJ2S+7fXY+h5LS5mzlfjroHh/4gf2l8SfA+nXGlW5JvNR0q4jCNeWTNtTVoE4IQtlZVwCrc
        kda9HLq9TDtYTEO/RPs/5X59j5TPMrjioPE0V76381/meH7OAUk3A85r6Q/MyUBCm0EE+lAiFGEnU0AO
        oAIVL/eFBkS7+M7eKAJY0aCXgbqAG9gex6UALHx1rYBIyB1oAk3D1rEBaAFZFP3zu/3aAEX930oAmoAT
        Hzbf4aAHbuM7OKAGeWf79ACx8SZPSgBCPnz2oATy22RjHI60ALs+bbv+b0oAdtONuOf71ACD5hlunrQB
        NE/l9U3UARvEH60AJQAzb/t0AO3DaDng9DQAtACR8Lk9KAEZgn3TmgCLcPWgA3tnbj5KAGbT6UAG04zj
        igAl4oAilL+lAEUm89s0AO2n0oAY0hf/AGKDUdQA3Dfu/m6daAGfx57UAD/N05rYCL09+lACHjrQAzH7
        vHegAx7mg2IqAFCK/wB44oNQlgx5mx856UARMpaPBGw0ASfxY70AEKl23MML61iAFVXqaAHKqN0lBoMh
        4fPRaAJFQJ95WFAB/rCAPlJ6CgCVf9JZl+6V+770AMKlZMkYFADlYM+QcigxFf5vvUAREYmwfuetBsGf
        m39v7tADZIc9Bmg1IG/eR4PWgCLjtyKAOun+SWRj8y7jzSbUVdnEoynPlirtn6J/sjfB23+Ffw8j1zVU
        SHXdajWaeSbA8mA8xx5PTruPuQO1fkeYY146u6r+FaR9O/z3P3jAZfHLcNHBwV5bzfeX+Udl831Lv7Rf
        gXV/FNm+u+HiNWv9LtJ7Q6QXHkyRyKDPv5BEm0LsxyGI7Gvm8ZSlNe0hq0tunn8+x99w9jaOHqfVsV7s
        JtPmtqmvht5X+LujzD4Nah4l1+70650ixRjqDfZ9UtryUFJLUJwl/GACtxs/1c6rhx8retcOGdSbUorf
        R+nmu/Z/efS5zDCYZThWl8OsGv5r7031hf4ot3juiTxh478NfBQnwfoTQ+LdcgkkjtW1NQbHSYySyw7V
        4kkA4H8RwASKqrWp4Vexp+8/PZeRlg8vxWdf7fiE6dPS/L8U3s2r7J9enZHjHiLxr4g+Iwmn1fV77XN6
        Bk8yb7NaRHn7sYwpXIwM5weCea8uVWpW1lJv8Efa0cFh8t5Y0KcaettuaT9X3X9I5vwPZeHRN4hOo+K7
        TRTNps0FuJLYusjPgqMkZBXBBJAAJGDXJQVNOfPUtdP8T28wnjJRoKlhXPlkm9bbb/f0/IqeELWOC5M1
        nK1zInzhradrWaPn5eQevBJ2kgClRXLs7/OxWZSlJJVI8vTVKSff/JXs7nrXhv8AaF1bTtGuNE8YMfGn
        hOWOOO807U1KXoVjlQjjG/oCFbkgda9OGNlGLhW96PVPc+QxPDtGpVjXwC9lWTbjKPw6b3XTs2uvQ9x0
        F9P0bwLq3iX4eztrU+u37y208VnGJNOUrloriVz8kceCSW5A4APFetDlhTdShrzP7vXyR8HiFVrYynhM
        y/dqnGzV371no4pbuXlvuzxvwxpWv6n4he/nvY/HGu6hc/abIXFusyagqupWWKJgFtIAVw1wwDMMbQa8
        ylCpKfM3zNvTz9Oy8z7LF1sNTo+zjD2FOKtKza5W07qT1dSXVQWi6n23HJb6rbPp16kDXD2y/arMneAr
        ggg+qnDDPfFfUbqzPxnWnJTpvS+j9D8xf2oPg+/wc+JF1aW6t/Yt7/pNhIefkJOUz6qcj8Ae9fpGQY94
        ii8PVd5Q/FdP8j8x4ryxUK0cfQVoVb3S2U1uvR7r5roeQFmXrX1l0fBWYuP3me1K6CzE3DdIM8noKd0F
        mJ5p3be/pTCzHg7unNAWY3e1AWY6gLMb5ppXQrMdSuh2YHgZPSi6CzCi6CzLug+HNS8W6/Z6Ro9m99qN
        5IIoLeMgF2PbkgD6ms6tanRg6lR2SOujRqYioqVJXk9kTeMvBuufD7XptF8Q6dLpepxKrPbykE7WGQQQ
        SCD6g1nQxFLEw9pSd0XicNWwlT2VeNpGH5TehrQ5SfzF9RQAu4etAFbPGzv/AHqALHmL/frS6Aaqq+Np
        Bz096d0BFsb0ougHeYduz+GldALGwBwTg1mOzIpFdBlzx70BZjMe5rY1G+Yd2/8AioAZGpX7g3fWgCPB
        3Y7+lADwwPQ0AM2n0oASgBdp9KACJFZtrkA+9AEsyKnl7TnHWgA2nbnt60AJ/Ft7+lAEv40AJ83pQAuP
        mxnn0oAVZs9MUAOoM7Miy3pQFmErt6UGhW3NtZOy9PegALBPL2Hbjruqbo1EMhHWi6AjaQr/ALdF0Owz
        HuaLoLMVVKQ+aPzrM0Hvd3N3bhTcPJHH/C/agCCWJ4JFMilAeme9AEcsh87P/LT+92oAZQAfxbf/AB+g
        CVPk+9xQAvmqP4aAH+Sdu7d83pQZD/N+lAE8fatLoCSNgJMk8UXQExkCx4KYNZmRJg0AJQAgDOMs2B6m
        gB4Kt95cVpdGdmNouhWYVmFmLFz9/j60BZgefv8Azf7tAgLASZJ4oANp9KAHecPWgBPMH9ygBu5vQUAO
        EgTqu6tboBtK6AUqQMkcetZgN3D1oAWgCz5i+ooArUAO8wf3KABAUO8jA/u0DsxI+DvPA/u0BZjxIT05
        oEMPz9PloAQuyfdGa1uh2Ybz6UXQ7MeYwBk9KV0aDGIk6mi6Aiyc4xzRdADsG+8cU7oCtub0NMdmRAhu
        nNAWYm9c4zz6UGguRQAzHy7s/L60AJkbd2ePWgBce5oAQkH753f7tACn5ZMnpQZ2ZJ/rOny0BZkm4etA
        iQSFvvUAOoAsRuw7YoAKm6M7MAzHoKd0KzJl+dcnp60XQiWldAJ5Z3bd3y+tO6ATyz8/z9elF0Ao5+/x
        SujOwY/d470XQWYBg3Q5p3RoEn7rr81K6AUDH3Pl/wB6szOzEb5Pu/c9aAswyKAsEXNAWZ7v+z1d6R8K
        Ra/EDX1txfXd02n+H478MtuGUA3d3IwB2rDETz67vSvm8zdTFN4WlsleVt/7q+bP0XhrAqnB42otXpH0
        6s9ZPwH8BftK67B4p8Pa5rGlaXbYa7sb2yItPsMkjyyxxSHgO7s0hIJxvwRxXiLGYnL4OhUim3s09brR
        X+Wh9vJQa572SPUBfadqtxYQW1sln4T0VVt9J0tR+7IQYEjDvjHANbxoyw1Nq96k/if6L9T4+VdZjW9t
        U/hxfurv/ef6Gl4nvNO8Z+HtQ0PV1a402/i8meNXKNt7FWHKkEAgjpiuWnQnSmpw0aPV+to8e0Hwk+le
        MdOvNA1nx3bajpGpJ9qvdf1l7myuLYDLIqHiUOCACBkHqa9Op79NxqRhZrSys0/XpYr60kr3O48I/Drw
        9osCaUs13qtidTl1SGw1CYG0huJHMhYRgAYDcgMSAa4a8qj/AHktGkldb2WgRxPM1FHfS6XpcOsTeII7
        ayfXJoDFcXxQ+dJEP+WZJ6r/ALJ4rzYybXs3fludEptK6Zxz+GPCs5sllsDNZWU4ubXTZZnayglByrrA
        TtyDyAeAegFeko1Vdp6vS/X7zl+tq1it8OdOuvCOseMNa1fUotY1/wARaj9pn1CNCn+jou2CAKc7VjXj
        GeSSaqtT9pGEIRtGKtbz6v5h9bR03iO90zxfoV5o2tW0eoaZdoUmt5RwR6j0YdQR0rKlSqUKiq03aS2Z
        hXqUsTTdKqrxZ5l4fgTxDZ3nwK8b6jcXVhdBbzwrr24ee6xMHEBZuPNTGAe6k12Yyly2zTCxs1pOPS76
        +j/MwyrFyo1P7OryuvsPuuz80clZ+DvC37PWqz+I9ekPi3xTcXD2tt4Q0243/YQ6YukkcY8zdE6kx7Qm
        77o5zXO61bHxVKn7sVvJ9e3pr137n1Vowdz5v+JvhDT/AAV4xmt9CuTqHhPUYV1PQb3BxNZSE7V57xsG
        jP8Aug96+uwVeVel+8VprSS81/nuflme4FYTEe0p/DPVevU5aPiXmu4+ZGFS/QbaAJdp9KAGJGR1agzs
        ybHzZ/5af3u1AWY7nbs3c/3qAsxuW8sjHK/doCxJWl0IdtX1ougG1mBJuHrQAo56UAA+bpzQBLkUAAYH
        oaAE3NsxjmgB1ACJ84+XmgBaAG7m9KAHbTu34+agB7EJ944oAj77+392gCTI9aAIg7HpQAbhnGeaAHiQ
        HotADfNG7bt+X+A+tADtp9KAG99/b+7QBE/7v73FAD5cr92M0AMPHWgAoATcNmM80AMT951oASVh60AR
        5HrQAZHrQAzzBjO3ig1EPDY70ALtO3PagCH7PzjcM+lACyqQcIMmtboCH+9/sdKLoBZVOcYougI9p96L
        oBB8zbQcn0pmxEeOtACbh60Gl0GX27sHb60BdAzC3GXORSuhjfNTbu3Df6UroBfMMn7wfKP7tZgOHAyn
        yj/aoAlldH+4MfSgyBBjrQA9WaTqKAEjddsZz8w60ATRMAvyHdH6d6BXQKwfrQF0OdVjbaDz6UGQ12Dd
        DmgCOXt79KDW6EJAGT0oC6FLMOoxQa3RB5bYzjigLkRTbxigZ7r+z54AX4lfGTRdGmj83T45zd3anoYo
        /mIP1IC/jXzefYl0MJyRes3b5dfwPpuFMIq+YPETWlJc3/b20fx1+R+iPxj8Oan4k8B3lnpBgkmA3Np9
        zbedDeqP+WLAEFQTj5l5GM1+W4iEp02ofd3P2nKsRSw+KjUr3t3Ts4/3l3a7Pc8I+HcfiTwp4qtPCbTT
        Wt7FLJcLp2o3JktLu/8ALywS7QFnjEZLeVINw2rycV5dD2lKapvR9ns35P8ARn2eYvDYqhLFxSlF2TlF
        WkoX6weilfTmjo7s0vjD4pvvh9omjW1pp2meH/HeqW8ltd3OmO0v2exWTcdjMAeWI27h8pJxV4iq6UYp
        JKb3t2OfKcJTxtSpKU5VMPBppS0vJrqlfpvbc+UtZOneFtOl1G9jnmE8jfYVmi8zzHBOZi5OPMzjjn7x
        Jr5yco0Y88uu3+Z+sYSFfH1VQo2TS97W1k/s27eemx5b4h8Uaj4gkSS5fybd1Igt4/lj2g8hfUAnnHev
        GqVZ1bOW3Q/RMDl2HwcXGCvJbt6u77+p9VfslfAXwH8R/DfiXVYNY1C7urnTn0a7sb20RPsMsoyXRwSJ
        OACK+myzBYevCVSMm21Z3WzZ+O8acQ5rluJoYepTjFRkqkXFt8yXddPM+YviBpHhzwl4luNO8Mazf6va
        WLNDNqN7bi23yqcNtUE/KCCMnrXzmIjSpT5aMm0ur0P13K6+Nx+GVbH0owc7NRT5tHqrv9Df8JeNopbu
        PTfEkbNjaiXLQh5ouAFbBIJZRyvPOfpXXQxKdoVf+CeDmeUyjB4nAPR7q9k++2lm9+x7R8LvF+q/BzW5
        LqKRxZPMqavYzpmK4t+8mzqsgBP5Yr2qE5YaXN06+h+c5phaOcU1C3vW9xrdPs31R7z4903RPAl4Lu01
        1PC3g7VVa81KSzhkW91OSTlFjugGwvIAiXHXjGa9atCFJ86lywertu/n+h8LgauJx0fZOl7WtDSKbXLF
        Le8dLvq5P53OW+D+q+KNZ8eaI0Go3YJtTbJdahZTukNqrhhbEYCeYyrnezMQc+tYYeVSdVWf3p7du3zP
        UzalhKODmpQW97KUbuVvi78qfRJHb/trfDlPGnwgm1SKEPqGhyC5jYDnymIWQfT7rf8AAa+uy/E/U8XC
        r0vZ+j/4NmflGLwn9oYGthHu1zR/xR1X3q6+Z+a/+q6/NX68fgg6JGnmSGNWklchVjUZLE9ABQ2krspJ
        ydlufZv7Q3hDwl8D/wBmrw14dk8OaPceMdQRIzevbqbhJNqvczrJ9/htqDnHKjGABXxGXVq+Px86qm1B
        dL6W6Lt/TP0TNaOGy3LYUeSLm9L21v8Aal3/AKR8Vbht3Z+avvT85FLNJ0G2gBu+gB3z+hoAd5sv92sQ
        H7hjOeKAB+Y8DrQB9UfGv4GeEfBf7MvgfxPZaPPbeKtQSxSeaOaRhK8sDSvvRiQOQQMAc4HTivk8Dj69
        bMKlKUrwXN22Tsj7nMMsw1DLKVaMLVHyrru1d3X9dEcz+xB4Rm174+2V08Mgh0S3nupsocK5UxKrccHc
        +QP9k+hrqz2uoYJxT+JpfqcPDmHlPH80k/cTfz2s/vf3HpX7RH7J/izx38TPHPjebVdM0zw/HAtzDNez
        MXdYrZAV2gYVQVYZJHTODmvKy7N6OHw9PDqLcr9PNs9rM8jr4vFVcS5qMLaX8kvuW/8AkfFm+vtz86GD
        5unNAC/P6UAJQAUADO3O0Y39P9mgD618DfsfaRrH7O8njLxLq9x4a1qSGTUIJp2X7NHbgfuxIuM/Pjdk
        HPzLx2PyOIzmpDG+wox5o7ed+tvyPu8LkFGpl/t68nCbu79Eul/z7nyVX1x8IO/j3dvWg2GzM0iYI59K
        AIywHU1sBHQAjMydKAO88J/s+fEXxvYxXujeDNYuraVFkiuZIDDFKjDIZHk2qwI7gmvNrZlhKD5alRX+
        /wDI9ShleNxEeanSdvu+69rnOeMfA2ufDnX5tE8R2DabqkKq727yI5UMMg5Ukcj3rpoYiliYe0ou6OTE
        4athJ+zrRs/l+h7xr37MfhrwB+zla+NvGOtalpXi/UYjJYaRHs2OzDMUbRsocHbhnO4bQcYyOfn6ea1s
        Rjnh8PFOC3f5u97enc+lqZPQw2X/AFnEyam1ovN7K1r+vbU+a9pzjHNfUnyI3c3oaAFHzLuH36AJFYJ1
        O6gBNozt3/L60AKOV3DlqAAuw60AWYLWW6njhhVpppGCJHGpZmYnAAA6kntSbUVd7DjFyajFXbPqr4yf
        sg6H8L/gNp/iu61yTTfFNvBCb2zu3WSG6nf70MWACGXJweQQhzjlh8hgs5q4rGOio3g27d0u7/r/ACPt
        cdkdHC4FVnO00tezfZfp+Pc+TYlPpX2B8SP3H0oAXcMZzxQBDJIT05oAZ/Ft7+lADZ4nRN7KQvrWJqfe
        Ph79l/wv8af2SfC1zoFnaaf4sjtJLiDUlUBri4DsJIpmAyyllKjOdmBjgEH4KpmdbBZjP2jbhfby6Nf1
        qfo1PK6GOyyn7NJStdPz63+f3HwVLbyQSvHIjxyISrI4IKkdQR2Nfeppq6Pz9pxdnuRkhTgnmgREUdQM
        nCnovrQAiyFGVh/B/D/eoAS5d5s72xt+7QA6SdDJnGRQBX+f0oA7TwL8HvG3xLOfDHhjUtYi5/0iGAiA
        EcEGVsID7Zrjr43D4b+LNL8/u3O/D4HE4rWjBtd+n3vQ6/Wf2T/i54cs5Lq88DalJCi7m+ymO5YD/diZ
        j+lcsM2wVR2VRfO6/NHVPJ8fBczpP5NP8meYqwt43tpISJ0YqysMMpHUEdjXqppq6PIacXZ7lcEFcg8U
        zAcACcA80ATRSL60AWPMGM7eKAHKwXvvoMifaY/9UMfWgDZ8E+Erzx54t0nw7p8sEN7qdwltDJdOVjVm
        OBuIBOPoCfasK9aOHpSqz2XY6cNh5YqtGjBpOXc6740fALxP8Cb7To/Eb2EqagJDbyWFwZFfZt3cMqsM
        b16jvXHgswo49SdK+nfzO3H5ZXy7l9s0+baz7fcebDnpXpnkhQAUAA56UALtPpQYjpIwenNADNzegoAd
        u/2DQA2gAoAKAPaPEX7OL+Hf2e9G+J1xryJJqDKo0hrbk75HCFZd3OUXdjb6814lPM/aY2WDUNut+y7e
        vmfSVsn9ll8cc56u2lu7019PI8ck5Gf+WXr2r2z5s9R8Ufs4+LfCfwp0v4hXQ0+fQL+GGcLBOfPhWXHl
        70ZR1yPuluteTSzOhWxLwqvzK68tD3K2T4ihhFjJNOLSe+uu3Q8pyK9Y8MUKW6CgBDwcd6AFKkdRQB6d
        +zp8Kbb41fFSx8N6jcXFrpzwTz3E1oVEqqiHbtLAj75QHI6Zry8yxksFh3Vgru6Sue9lOBjmGJ9jNtKz
        btv/AFcwPi74ItPhv8Stf8M2OpjWLbTbjyFu9mwsdoLKRk/MpJQ+6mujB15YnDwrSjZvp/Xfc5sfho4T
        EzoQldR6/wBdtjkY1I6iuw8oQ/L14oAQc9KDYKACRmKYA5oAbtPvQB7V+zv+zPe/HJNa1O71NPD3hzTY
        mVtTlQMGn25C4JA2qPmY5GBgd8jw8xzSOBcYRXNJ9PL+tj6LKsolmKlUnLlguvn/AJLr/VvJbzwtfG/1
        mHTo31q20ppPPvtOjeWARqxHnbgOIzjIY44r1VWhyxc3yuWyej9PU8aWHnzTVNcyje7Wqt39D079mX9n
        26+NfilrnUN1l4N0phLql+x2KQBu8lW/vEdT/CvJ7Z4M1zFYGnyw1nLZfr/W57eUZa8fU5p6U47+fl/n
        2RZ/aUfwt4/8W3F38LvBrWfhfQrfyL3VtKsXW2mYHPmMFG1FA4DHBbknjFZZZ7bD01HG1fflsm9fx1+R
        rmvscTU5sDS9yG8ktH92mnf9LHgu/jds+avoT5sTHuaAD+An06rQBHsO7bj5aAJO+M80ALtG3dn5fWgB
        ApAyg2j1agCWOgBKDIl/h3dvWgCUfMcDmgBfN9xQB1Pw98A6x8TvFth4d0G2NzqF2+ATwkSD70jnsqjk
        n8BkkCuDE4inhaTq1Hov6sdeEwtTGVlRpLV/gu7PrD9pn4B+BPg/8DPD+nadp4u/GMt7Fa298mftN5I2
        TKSgzuXjAXnaWUDrz8llmPxOLxkpzlaFm2uiXQ+2zbLsLg8DGFON53ST6t9fU+UvHPw58T/C/V4NL8U6
        TLpF3PAtzHHK6vujJIBBUkdQQRnIxzX1mHxVHFRc6MrpaHwuKwdfBSUMRHlb1/qxh+YuM5FdRxC7hnGe
        aAFoASTnpQAtAETfIu4dKAPdm/Ze1fUv2etM+I+mGe9vJXmmu9NCjKWisyrKmOSRsLEf3WBHQ58D+1oR
        x0sLPRdH59mfUf2JUnl0cZTu5PVry7r8zw6vfPlxIhltr8L6mgA3ndt3LmgCa0tJr27gtbVDJcTyLFGg
        6szHAH4kiplJQi5S2RtRpSrVI047t2Ps3xbYfDGDwnpnh7WNFm1/R/CljHbXGq6LqK/bbKYPuuN9mSJC
        GcfMyhtykjpXwNOeLdWVWEuWU3ezWjXTXbTp2P2+nSp0aUaUVpFWPQdY060+CXwcsfD9tcbrvViLq9kU
        NGjkqoYrEf8AVbsLlAAMluOavLqbx+MddrSG36a9bHznEGMWGw6oJ6z39P8AgnmC+OVVQokAAGAAa+te
        Dbd2fFLMoxVk9Bf+E7H/AD1/Wl9S8h/2mu4f8J2P+evT3o+pPsL+0l3NbQfi/N4edmjS3uoictDcLkN+
        PWuSvlKxG7afkddDO/Yaqz9T1fxt8Y7jR/A/hzVvsGnu2uIXdWU4QqOCPX8a+awmUqtiatHmfuH0+Mzl
        0MLRrOK/eHjN98SJNRunuJpV8x+u0BR+Qr6ynl6pRUIo+Rnm3tJczZB/wnQ/56j860+peRH9pruH/CdD
        /nqPzo+peQf2mu5zfj7WH8QaIktlceRrOmSrf6bcqfminTkY9jjBHeumhhuSTjNXjLRryZzV8cqkVJSt
        KLun5o9Q8YW2k/G7w18O/iVdWoh0eaF01U6NZltWjvdhjQo6KzMqt5ileOoOa+E5KmX1q2CT95bXfu8u
        /wCKsfrGCxMcdhqeJXVa+p4J8Yb3wh4s+FFla+EbXXQPA9yzpfa3GqvcWlxIFmjVR8yLFJJAQrAYBPvX
        t4D21DEt1mv3nbo1t96uebnWHjicFJRWsdV+p4TsPmZxxX1B+SBQA0sw6igBdw9aAJcj1oAAM9DQAY68
        9OtAElBkA5OB1oAKAActtHX0oAlj4ODwaAA/P0+WgBMt6GgBY+OtAE+0+lACUAI4x975v92gBaAF2n0o
        AdketAERYS5z260AOoAKACNCOooATzV8zO3igAj460AO8sfN/s/d96AGbm9KAHHjrxQBEikLlhuFADpF
        /wBugCORgehoAWgCIc9KAE3rL90haAGSHPSgB2z5sd6AItp9KAAxsI8EEGg1GyfMNo5P96gBCm07i3/A
        aAHdtnf+9QBEYmUbS2D/AHqAIl5MgHJPSgBskh357UAO2n0oAXYsq7gdrelbGxVlU+lAEYUscAZoAd5p
        27P4aAHGVSu1l3N6ViajMrnG3mgBqcHceJP73agCVlKpgjBoASPjrQZE2Pc0APWNV6yAUAORkCkleB1N
        ACL8kfFBiTxnHVMUAItvuXczYb0oAWOMDrQBE8bHOAfl+770ANcIY8Z5oAF+b73FBsRGFhHgtg0ANZTn
        pQan3J/wT68OLLr3jHXnXmGKKzjYj++xZsf98LX55xHV58TCkvsq/wA2/wDgH6XwtQdLAVKrWs52+UV/
        mz3Dx98UfEfg7xjPcI9pceE4LiOynt47OWa7RzC0ryKUPKqNmQRxmvhK1epSnf7P47H6xgcuw2Mw3I7q
        s02m5JRtdJLXq9TP0Dx9L8SL/wAKWGm+GH1ArNDqWr6tLavYxWMwXIkjLD94zHK7e4zk4pQre2cVGN+r
        drWNa+XrL416lWuo6OMIpqTkr7O2yW9+58z/ABi8Wal8RPjx4ksbeBZ7QTLYRtuO/wAmHO5EAHVm38iv
        n8TVliMVKCWm33H6jlOCoZbklHEVJNSs5W6Xls36Kx4L8UdV/tLxffW8R2Wdk5treELtEag4xj1HAJPJ
        xzXhYufPVcei0P07IMMqOBhUl8U9W+//AAPwNzxX8WovFvw18OeDYfDlhp8+lsqjVYkVZbksfnU8fKGb
        aeDzjmtK2LVahCgoJW6nDgcieXZjXzOddyjO/u62XZ+dlf8AQztck8f/AAqsdK0W+k1TwvH5n9r21rEx
        iZpCcCViv3m44BJ47c1nN4nCKNN3it0deFWTZ3VqYqko1X8Db1suyT2XdjtZ07xP4Q8U6T4u8V6Kzpqc
        66iPtUKiPUFIDMNh9R144zVVI1qNWNatHRu/qTh6uAzHCVcty+rbkTjo3eFtFr5dO5H8X/iQnxX8YNr6
        aLa6AZIEjktLQDbvUY3bupyAOvTFTi8SsVV9oo8uhtkOUPI8I8LKq6mr1fbtbp8jsdA1S91HwDaa1Fbr
        d3ens1tcySjaskWFCxk4wWyS2Tzjr2r0ac5SoKoldrc+RxeFo0czlg5PljOzilun1fpbS2x9cfs66npf
        j74KeHL3xPeC2PhHUGKme42QblUiEyZ4YKrjGe4Br6LAyjXw0JVPsM/I+JKNXLs3rUsGr+2j2u7PdL1a
        1K2pftcXaJNb29lpl1uj+zx3FpeksZ2ChXOV2IgLHJY/wGh5ja6ST9GFPhNNJzlKPV3XRX87t+i6nrXg
        rWpvix8JJ/7TOntPf2strOunXP2iNSyEYLY+9g5I7GvSpTdald7+Wp8ljaEctx/JTvyxa+JWbXp2Pye1
        OJ7TVby2lG2SKZ4yPQhiK/a8FUdbDUqj3lFP70j+ds0oxw2PxFCG0ZyS+Umj2/8AY2+Fw+IPxXttWvkX
        +wvDgGo3ksnEe9cmFCc8fMN3PGI2zXmZ1i/q+GdOPxT0Xp1/y+Z6vD+C+s4tVZL3Yav16f5/I+7PFfgb
        4X/E+3svHOvwaZrlhZ2jeTqdxeM1mkAJZmI3+XjOcsRnjBPFfB0q+LwzeHpNxbeyWt/zP0ith8FiksTW
        SkktG3pbv2+Z8V/ta/Fz4c+MbPSfC3gDQ7OGDSrlpW1WztVtomG0qYo1CgspOCWOB8gxnOa+2yfB4qjK
        VfEyfvLZu79WfAZ7j8HXhHDYWKtF7pWXay/q2i3PKfB/wF+I3xCQSaH4R1K4gIDC4li+zwsD6SSFVP4G
        vZrZlg8PpUqL8/yueJQyrHYjWnSfz0/Ox2up/sUfFzTLBbn/AIRyK7yMtDa30LyJx3G4Z9PlzXFDPcBK
        Vua3qmehPh3MIRUlFPyTX62PIdd0e/8AC+pzadrFlcaXfwnEltdxNHIn1UgGvZp1adWKnTd15Hz9WjUo
        TcKsWn2ZSEit0INBiRhgUwDzQB9WfAHw38ANV8L6I/ib+0NT8YzzNDLpOLmUmQNkFY4F5QrtOWJHUHoa
        +SzGrmcKk1SsoLrotPV9T7rK6GUVaVN1U5VG9Vq9fRdPXTufY/xb1fxR4K+HlxdeBtJ028vLGEnytQmM
        UUECISSoGNxAUAKWUe/GD8bhIUa1ZLESaT7au/8AXqfdYydelQcsLFOS7uy/r5r1Mf4AfEjxd8TfDNvr
        HiLwdbeHrW7t1uLe+t75ZReZxhhEBujBGfvMTxW2Pw1DDVHTpVOZrfS1vn1MMuxVfF0lVrU+S+q1vfz8
        vmeYftbeOfCmv6VrHgO2g17xV4zliVoNN0LzpI7OTGUMyIQp9SpDt8w6cEellNCtTnHEtqMO8ra97X/4
        CPMznEUalOeEipTqW2jd27Xt+Wr8j887u0nsLqa2uYZLe5hdo5YZVKvG4OCrA8ggggg1+jJqSUou6Z+U
        ShKDcZKzRGfn/wBmmTZh83pQOzOh+HGnWOs/ETwvp2plRp11qlrBdFjgCJplV8n02k1zYqUoUKkobpO3
        3HXgqaqYmlCa0ckn6XR9kft5fBHRbPwdYeNtGsrfTLqwkjsbqG2jEaTQt8sZwBjchAA9m9hXxmQ42p7V
        4ebunqvX/gn33EmX05UFioKzjZPzT0/A8O/ZL/Z8k+M3jMahqcTL4T0iRZLxmHFzJ1W3B9+rei+hYGvd
        zfMFg6XJD45beXn/AJHzmR5W8dW9rUX7uO/m+3+f/BPtr40/Aqb48LpWnz+LJtJ8FW6CSTTNKgXfdSA/
        KxlJK7VGNq7CAcnnjHxGCxywPNONO831fRen/BP0LH5e8xUac6jjT6pdX69l2seKfFDQP2cvgN4d1DSG
        0iDxD4meBoVtRcPdXKyEYDSNu2Q4JB42n0Br2cLUzXMJqak4x77L/gniYqlk+WU3CUFKXbd/jt+HkfC/
        /LXH8HrX3p+bDolJ+8MUARyIp75rS6A+r/8Agnr4V8PeJfFPjH+2rGz1G6jsIo7eC7iWQeW7OJiFb6IC
        cdGx3r4/iOrUhCkqbaV3+Frfqfb8MU6c51XNJuy+53v+hx37Xf7MzfBHV4tb0ZjL4Q1Ocxwq7ZezmwW8
        k92UgMVb0Ug8gFu7J80+vRdKp8cfxXf/ADODO8qWBmq1L4JP7n29Oxt+Df21fF2l/BzS/AXh3Q2n8U2s
        P2G21WIGZlgUYQpCFOZFXCjOR8oOD0rnr5JQlipYmtO0Hq1tr69jqw+e11hI4WhC9RKya10XW3f8Ovkb
        37Mn7KXiXxv44Xxt8SrC+gsIJvta22qhludQuM5BkVvmCAjJ3Y3cDkE1zZnm1GjR+rYNq70utkvLz/rc
        6cqyivXr/W8cnprZ7t+fku36HJ/tqeHPiVceKYvFXjS1gstEnmay0mzt7tZVtkA3BSB/EwG5m7kY6BRX
        XkdbCKn7ChrLdu2//DHJxBQxjqKvXtyXtFJ7f8F9f+GPmfzDvz2r6i6PkLMcPm6c07oLMTcJOhxTEG4e
        tACjnpQB7d+xt4d0bxL+0B4dtdcWGa3jWaeG2nUMk0yRsyKQeDgjdj1QV4Wd1KlLBTdPrZPyX9afM+hy
        GlTq46KqdLteb/rX5Hdft8fB7TPAHjfSvEeiwJZ2niFZjcWsS7US4jK7nHYbxIDj1Vj3rg4fxk69KVGo
        7uFrej/yPQ4kwMKFWNemrKd7+vf5/odD+w1+z5/al8nxL8TQpDpVi5/smKfgTTA4M5zxtQ8L6tk8bRnm
        z7MeVfU6L1fxf5f5nVw9ll39drLRfD/n/l9/Y+gfip+zAnxp8cjWfGXi28fw5ZACw0LT4lgSFcAuZJGL
        bixHJCqQOAeK+ewmaPA0uTD01zPeT19LLTb5n0mMypY+rz4io+RbRWnrd63v8rHzp+0fcfAHwJ4G1Dwn
        4K0e01HxW7IqX9nK84tGWQFy87MckgMNik9eQMV9HlizPEVo168modnpfTt+p81mksqw1CWHoQTn5a21
        6y/S/wCB8k7m/vLX2Z8KRbhs8rIx/foAjqbodmanhbwvqvjbXrLRdDs5NR1i8cpBbREBnIBY8kgDABOS
        egrGrXp0IOpUdkjejQq4ioqVJXkz2rR/2GvjDr85+06FaaNDxhr/AFCHB69o2c8Y7juK8GpnuChtJy9E
        /wBbH0NLh/H1Piio+r/yue7fC79iD4geF0tTffFe98PQxklrHw5JMV55IDsyAZ6n5D/WvBxWdYaq3y0F
        J95W/r8T6LCZHiaCjzYhpLpG9vx0/A37f9lj9nj4cjHijW7W9uwxLPr+vLAxbrjYjRg/TBP1rneaZnif
        4MbL+7G/+Z1/2VlmF1rO77yl/wAMj4T+Mvh/w74V+I3iDTfC+qxaxoMFx/oV3DIJFaNlDBdw+9t3FSe5
        UmvusHUq1cPCdaNpdV/Xfc+Bx1OlSxE4UHePTr/VtjiBIW3buNv3a7DhHeavmZ28etAEX+r6/NQB3vgD
        9nz4i/FG2+0+GvCV/qFnjK3bhYIH6/dklKq3TsTivPr5hhcM+WrUSf3v8LnpUMtxeJXNSptr7vuva52H
        w5+AXiHRP2g/AvhTxv4fm05b++jna3ulV47mCMl5FDAlWBCEEAnr71yYnMKU8FVrYed7K3o3p6nbhcuq
        08dSo4mFru/Rp21816n0t+0x42+KXj/4ian8NPhHa3drZeGrSGbUm0u5S0kdnQMqq5ZSEVWUbFOSd2QQ
        BXzmW0cHh6McVjWrzbtdX2+/8T6XM62MxFWWFwKfu25mnZ66pdPwO+/YM+Iet+OvgnfSa/qM+q3Wl6pN
        aRXN1K0kzQ+VFIAzMSWwXYA+gA7VxZ5h6dDFJUlZNJ+W7X6HZkWJqYjCN1XdptX67J6/efmhq2uXOt6x
        f6rdhnub24kuZnJyWd2LMfzJr9IpwVOChHZKx+aVajq1JVHu2395TKljlxuk/vL0qzlJYVLSAgZFAH0t
        +wR4V8OeJfjLcpr8NvdS22mSy2VpdKGjkkLIjHB4JCO2B7k9q+az+pVp4Zez0Tep9Xw5TpVMVJ1N0tP1
        /rzJvip+xz4h0j42W3hHwusNxp2trNeabPcy7UghTBkWU4JGzcoyAc7l7kgGEzmlLCOtW3jZPzfS3qGM
        yOqsYqOH+GV2r9Lb39Loj1D9nn4cfDPxfB4c+IXxPaLVW2Ce10XT2dLXcMqZZ2yFyCDjZkAgnAINOOY4
        zE0nVwtDTu3v6LQmWVYHC1fY4vEe92S29Xr/AFqdH+0j+xxo3wd8AS+LNG8VXNzBFLHF9i1CJWeYuwA2
        SJgZAy2CvIB5GOefLc5qYyuqFSC16ryNs0yKlgsO69Kb06Prd91Y8S+BFwYfjd8P2jcqx1+wXI9DcICP
        yJr3sek8JVv/ACv8j5zLZOONotfzL8z6N/4KSH/ipfA/OP8ARLn/ANDSvmuG/gq/L9T6vir4qP8A29+h
        8dR8DJ6V9mfBiZFAH0Z8Cv2MtV+NPgy38TN4jtdE0+4mkiiT7M1xKQjbSxG5QPmBGM9q+bx+dQwVZ0VD
        ma87f5n1WXZBPHUFXdTlTv0vtp3R3+pfCb9mr4OSyWninxPe+KtWibbLZwTsxVh1Ui3A2H2Z8150MZm+
        M96jBRXe3+f6HqzwOS4G8cRPml2u7/dHb5nP3n7Svwa8M+UPCXwWsb0xkFZ9bWIOuOh5EpJz33V0xyvH
        1b+3xLXpf/gHJLOMtpWeHwqbXdJf/JF3QP249IvtYtbLxD8M9Bi8NyOEmFtEJHhQ8FgrLtbGTxgZrKpk
        NSMXKlWbl/Xmb0uJKc5qNailB79bfK2p9B/Gz4B/CpPhj4k1t/B2m2jWGmz3kM2kxC0cMsZZSPL2g844
        II9q8DBY/G/WIU1Ubu0tdevmfRY7LcAsNOpKilZN6Kz0XlY/MMRluj5r9QPxwWgAoA9E8Gfs+fEPx9ZR
        32j+Fr19Odd6311ttrcp13iSUqrLjuCa82vmWEw75ak1fstX+B6+HynG4qKnTpuz6vReuvT0PuX4sfAT
        W/G3wB+HfgDR5oImsrmwTUbtnBSKGO2kWWQf3vnKkAdSR0GTXwuEx9OhjKuKmt1Ky821Y/R8dltTEYKj
        g6bsk4pvyS1/Gx8z/tF6L8MV1bwx8Pvhnpi3niW2u0sbrVYZSY53f5BEzZxI5cglhwuCo7gfTZbUxnLP
        F4uXuNXS/Vdlb79z5PNqeAcqeCwUV7RNJv10s31d7emx67+3ZqVl4I+CvgrwJaXCxy+dCBboPvW9vCU5
        9BuaPHrj2NeRkMZV8XUxEl0f3t/8Oe1xJOOHwVPDQdrtaeSX+dj4T2LjPavvT8zGl2P3/m/3aAFiOZMv
        wPegdmJI7HtmgdmfVn/BO3SPtHxV8Qao3+rs9HaPGP4pJY8H8kb86+T4jnbDwh3f5L/gn3HC9O+IqVOy
        t97/AOAfOd3PL4/8fTTM3kz63qZcs3Oxppc5PrgtX0aSw1BLflX5I+Yf+2Yp2055fmz7F1z9ir4S/D6K
        2k8YfEO+04TA7PPuba1MpX720MjE9R0zjPvXx1PO8diLqhST9E3+p9tU4ey7DWdes16tL9Da+F/wI/Zv
        +KNxqdl4ZF14hn03Z9peS6u4sBiwBBOwMMqeVz09xnDFY/NsKoyrPl5ttI/8E6MLluS4tyjQXM476y/4
        F/keB/tdfBzwN8GvE+mad4Vvr1r+6ja4utNuHEqWsfAjIfAYbiG+Vtx4zkDGfoMnxmJxkJSrJWWz7v8A
        r0PnM8wGEwM4xoN3erW6S/PX5nz95zbsbOa+hPlxtAHonwO+AviH46eJRYaShttNgYG+1SVcxWyn/wBC
        c9lHXvgZI8zH5hSwEOaesnsu/wDwD18tyyrmNS0dIrd9v+Cfe8Pwo+G3ivw5ZfCTTPFMosfD4E2p6Npd
        6iTXjHGTcsAWI3ElgpHLLnGFFfAPFYqnUeNnDWWza0XofpawmEqUlgYT0juk9X69dd+h4p8afFGqQaf4
        g+G/w48D3+g/DzQ7lLPxNqGi2ay3csbYMgRSQWBTJLMcsMbiq5z7OCpQbjisVVTqS1im9PK79eh4mOq1
        FGWEwlJqlHSbilfXdJej3O//AGevix8Lfi5pd18KND8NXWl+H7WxWVLbUpVjkvwHBk3iNjuJO1m+Y7gW
        BGAa4cwwmMwkljKs7yb3XTtv+HY9DLcbgsZB4OjC0Utn177P7+9zwn9oD9rTXLKXxH8NfCOiab4Q8NWM
        tzo8qW0KtLLGrNE4HGxFYA8Bc8/er3svymlJQxdeTnJ2l+vqz57Mc6qQc8Jh4qMVeP3aadEfKO0+9fW3
        R8cJj3NF0AN8pkB6npRdAfUHgD/gn7468Y2On6leaxo2kaVewJcxzLM1zKUdQykKoCng/wB+vlq/EOHp
        NxjBtr5f19x9dQ4bxFVKU5pJ9tf8vzPQvHv7Evw4+Dfwq13X/E3inVb6+t7KRbXY0VtFLdFT5apHhmJL
        ADG88Zz0yPPo55i8ZiI0qMEk35vTrd/8A9KtkWCweHlVrTbaXktfJd+yuzlPDP7DFh4e8HxeK/ij43tv
        DmgmJJnh09d8ih8bVMrDG7kDaqPk9DXVVz6VSp7HB0uaXn/kv8zkpcPwpU/bY2ryry/zf+R6zZ/BD4Be
        Hvgpf/EzRvDs3jDTLWymuLeXULq4Q3LRs0ZUodoXLqRkpx1AryZY7M6mKWEqT5G2lolpf+u57EMDldPD
        PGUqfNFJvW+tvJ/5FP4LfBX4L/tP/D648QW/gabwjfQ3L6fPHYajKfLkVEcMmTsIxIOqdcg5wDWmMxmY
        ZXWVJ1eZb6pf8P07meDweXZrR9sqPK9nZvf5adex8O+PdI03QfHGv6Xo1xNeaXZX81tbXFxjfJGjlQxx
        xzjPAH0FfdYac6tGFSorNpN/M/O8XThRxE6dNtxTa18jH2ndtx8nrXSco9mCSZU8UAWLSCa/uoba2tpL
        m5mdY4oYkLPI5OAqgckkkAAVMpKKcpOyQ4xc2oxV2z7e8O3uhfsM/DNJNRt49X+KPiGETGyDAi2j/hV2
        H3Y1Oc45dsgcLlfgqkaue4j3NKUev9dX+C/H9Epujw7hff8Aeqz6f10X4v8ADT/Z88J3/iGS++Pnxb1F
        pRBE8+lx3fEVtCP+Wyp/CO0ajrktySprLMKsKdstwS9bbt9v8/uNsso1KreaY+XT3U9ku/l5ffq2eKfF
        ifxd+0/L4r+JccUGmeDfDkfkWq30vl/uwchEwCGlYsCwz1dRnpXt4T2GVcmEetSe9v62/wCHPnccsTnP
        tMZG0aVPa/X083/kj57HzS7x0/u19GfI2Y/cMbc8/wB6gLMX5/Q0BZk1Aj7O0D4K+CPgh+zjqXiL4laV
        BqHiDWoMQW0oHnwO6nyYYSeUkH3mYcjBzkLz8RUx2Jx+OjSwcrRj93m33Xb/AIJ+jUcuwmW5fKrjopyk
        vnrsl2fdr8kfFknLM4/h6rX25+cn1V+zv+0J8X7XwzaeFvDPguLxdp1mrRW80lvIvkjJO15gwTaM4AbB
        6DNfI5ll+BdR1qtXkb3/AOG3PuspzPMfZKjSo88Vont972OQ+KX7KPj3wP4Pv/G+tRaZHEbjzLrT9PkZ
        3tVkbrgDbtDMBgMcAjtmu7CZvhq1WOGp320b62POx2SYuhSni6lt7tK+l/8AL8jwM7huyCMda+gPlhwU
        lQwHzHp70Aepfsy+Hk8T/HjwZZyRiSFL4XLqRkERKZOfxQV5Oa1PZ4Ko12t9+h9FkFL2uYQ8rv8AA+7v
        Fn7M6eK/Gen6ve+JJtR0yDU4tSksNUsYZ5VKP5gjhuQFkjj3Y+U7hjivz6lmHsqThGFm1a6bW+mq2bP1
        1wu7ng/7aHjaRvHFvp0UpCRLyAeyj/En8q/SOFMLFYV1Gtz8E44xlSeNVKD0R86f8JJN/wA9T+dfc+xi
        fmnta/cP+Ekm/wCep/Oj2MQ9rX7h/wAJJN/z1P50exiHta/cRvEcxU/vW/A0exj2D2ld6XPon472upaT
        8BPhdJKNr2URjuwrZMTOuU3fUV8FktWjVzXFxi/i287PU/UeIsPiaWR4FveK1+a0Pnf/AISSb/nqfzr7
        32MT8u9rX7h/wkk3/PU/nR7GIe1r9w/4SSb/AJ6n86PYxD2tfuA8STg5Ep/Oj2Mewe1r9z6V/Y2kk8c/
        DL4j+Aw8ZkiulvLMSzSRrGZRkHdGQwAdM8Gvy/iqksNjKOJ7qz+Xr5M/fuB8VKvgZUZvWL/P/hjqZf2K
        7Pw14P8AHF7NrT32qajpNwAltD5MYkML7lOWYurP5b887kBr55ZvKpVpRUbJNfmfocqKcWn1PgaxkNzZ
        W83P7yNX/MZr9IatofhVSPJOUezYu4etIyJpEU980ARmMDrmgBu4etAEq/I2G4PpQK6FCli+Bnd096Au
        h9BmKnEmT0oANp9KAEThdx+9QBL/AB57UAB460AFABQA/wAw5x3oAkKlTgjBoAQfN05oAKAJPxoAZtPp
        QAREjzMoeelACUAH2b/aoAlClunNAEJ2KcE4NAAWC9TigBNzelADqAEkhU9HFACbhndnj+7QAx1L5wM0
        AL5g/uUAMLAdTQBGjBOpxQA6Yq33FxQOwm//AKZ0BZh/Du/ioCzI/wATQFmNkZj2zQaDQpPQUAIqle2+
        gAPHWgBu9Y+p3UANMm+TOwqKAGy259DQBH9nb1oAV1MXQVsaXRFKDQO5EfnfI+UUDIdw9aAHiNmXcBl/
        SsTS6GbhvzmgLi+cf7poGOWbf1NAD6DIl74yc0ATacdjbQnzejUANy/mS8jP9zFAB/Bt7+lBnZk/mr/e
        FArMPNX+8KAsxRIpXIYEetAWYu4etAWZX2r60BZjaDUWTnpQBAYHB60Gl0foj/wT8Pm+AvFLH7yar5QP
        sI1b+bGvyLNG3mmIv/d/9JR+64CKWQ5fbrGbf/gya/JHs3in4F+DPEd9d6pdWU9lqE+557+zvZYHOVwx
        JDY+6MdOleJUwtKbc2rPvex9Dhs6xuGhGjCScVsmk1+Xc5f4Uror/EjWRoHijxH4mt9O09bOSa7kE+no
        Q+RFHLgb5F56ZwCeaxw/I6kuSblZW8j0M0WIWCpvE0YU3OV1ZWm9N2ukX+Z84aBbaT4euLvxBfbjrN5e
        3xtiqkyN+9dSFH8IAzuc/Rec14kFCm3OXxNs+/xk8RjFHC0n+7hGF+y0W/6L5s+TtTdpNTvGcYdpnLD0
        OTXyU3ecn5n79hko0IRXZfkQxStBKkqY3xsHXIyMg5HHep21NpxU4uL2ZveNvid4g+I9xYXHiLWJNSms
        bdbaF3bGFBOGwON3PUegrWtiamIa9q72VjysuybB5TGcMJT5VNtv/L0H+K/ib4j8fWWl2euarJqVtpcK
        w2iSAExKBjO7rkjrk84rSriatdJVHdLYWByfBZZUqVcLT5ZTbb8+u21l0ObrmPZPb/2fL/SV8P8AiLTt
        eAOl3kkasZELRhuo345UZx8wHGc9K9vLpQ5Jxq7M/LOLqWI+tUK+FfvxT23+Xf0e59T/ALOumaV4S0P4
        k2WoWwvtDs7uC4aC4iEiiMwq3zA5DY4ORxxkV9JgoxpKpF/CmfkfEFatjamDrQdqkotXWmt2ja0jRPhw
        /ijUdSubz+1be2vJUWGDC6fCxWRxA8S/K7hfMwT1yAO1bxp4fncm72+77jz6lfNI0IUYx5W0nd/G9ldN
        6pN22PX/AABo2h6L4Ugt/DyBNLZpJY1CgYLMSwwAMYJIx2xivQpxjCFobHzGMq161dzxL97S/wAj8uNY
        +G/iT4gfFjxdpXhfQ7zWJ4dWug/2WPKxL5zgF2+6gODgsR0r9YwmJo4XAUJVpJLkj+SPxPMMJiMbmuKV
        CDk/aTv/AOBPd7I+gvhb+xZ8SV8OXuna/wCMD4M0HUCsl7pVhMZ3nABBEu1gmMHH3mHqOK8XF51hHUU6
        VPnktm9LenX8j3sFkOMVJ061XkhLeK1b9Xt+aPp/RvAHhD4NfBR/Dl95+peFbOGT7UbiBrl51kcs25Il
        JYEv0A6fnXy9TEV8ZivarSb26Wt6n11LDUMDhPYWvBJ3ur3vvolr9x5L8Ov2ovhpd/FHRPAvg3wlBpmk
        X0jwnUhax2iedtJjCxAZO5hty2Dkjg9a9bE5Xi44eWJxE7tdL309TxsLnGCliY4PDQtF31tZX32+/tqa
        H7Zfxu8ZfC+Lw1o3g2NoL/WmlP22OATygoUAjjQggsd/PBOOnrUZNgsPinOpiHpG2l7b31ZWe4/E4ONO
        nhV70762u9LaJeZ6r8JdW8SaZ8HdL1T4kXSQa5DayXWozSokXlRhmZS4XCgiPbuwBzmvKxcaUsTKOFXu
        3sv69T2sHKtHCxljH79rv+tttz81/wBoL4yz/G74j3euy2629hCv2SwiC4ZbdWYoX9WO4k+mcdq/S8uw
        SwNBU+r1fqfk2bZg8xxLqfZWi9P+CeZswU4Xk+lemeKLHx1oA++P2SvF3jW48GaDpOifC+w02xiZFu/F
        d3J9nS5h35Z1jEYeWQocBgxXIGcDivz/ADejh1VnUnXbfSK1s/W9kvxP1DJMRipUIU4YdRirXk3a/mla
        7bXXa/U9X/aP+Lvw6+HmjW2neOrafWhfAmPRrWPzXlT7pdlZlTA7Fj1HHIrycuweKxM3LDu1uvb9fuPZ
        zPHYTB07YrXm6b3/AE+8xP2WoPBKRXjeCIfGn9l+RmKXxAZhYqhfO2AE7Cc8kgE4HJ552zN4htfWOXm8
        rX+dtSMrWGUX9W5uX+9zW+V9PuPOPjr+1l8T/hjr9xBb/D630DTGmZYdQ1WJ5xdKCQpDxsqBiBkrliMj
        8fTwGU4PFQTdbmfZaW+/X5nkZlnGNwc2o0LR7vW/3aL0vc+MfH3ja/8AiN4w1PxJqcdtDf6jIJZktIyk
        QbaF4BJPb1POa+1w9COGpRow2Xc+AxWJni60q9RJN9tuxz9dByhub0FAHYeGPhH4x8aeFL7xDoXh681b
        TLKQxTz2qhyjhQxGwHccKwJwD1FcdXGYehUVKrNKT7/1Y76GAxOJputRg5RXb/Lcv6t8cvG3ivwra+E9
        f8TXt/4ajkjLQOkckm1Tx85AdsdgzY4FZQwGHo1HXpQSnr3t/l+BtPM8VXprD16jcNL7X089/vZ7WPjf
        f/EfSdE+DPwb0RvC+mXiNbvdXswW5uAFLyF2TIQEKzMRuJ6DA4Ph/UI4aUsfmEuZrWy28t/wPolmTxah
        l2Wx5E9Lvfu9r/N6s1dI+D+l/CDTLvQ/Gnx/udChjUPeaB4ZnmbyiSPvBckZ3DrGM5HtWM8ZPGSVTD4R
        S7Sklr/XqdFLAwwNN08RjHFJXcYvb8317K522hfsJ/C3xr4WtNX8NeL9cu9Pu4y8F6ZYJEbBwfl8pSME
        EEHBBGD0rknn2NozdOrTimumv+Z00+HMDWgqlKpJp7O6/wAj4W1i0trHVb23s7sX9nDO8cN2E2ecgYhX
        25O3cADjJxmvu4ScoKUlZtbdj87qxjCcoxd0m9e/mUvMOM8YqzMafl6nFAHRwweMfhhdaXrUEOseF7u4
        TzrK92SWzSp3KNgblPHqCD6GuVvD4tSptqSW60Z3KOKwMo1UpQb2eqv/AF2NjxB8fPGfjq40aPxhrM/i
        XSLG9jvW026VBHIVOCCAozlSy89mNZ08uw+HUnh48smmr6nTPNMRiJQWJlzRi07WXT5dj7P0n9sj4V+G
        te0rw54B8IXF3FfSRxk6PpyWiIznlRHgM7AnnjB5wTXxVTJsbUhKtiZpW7u/4/8ABPu6Wd4GFSGHwsG7
        /wAqslfy09XofRXxFuPFFt4Qv28GWtld+IztW1TUZCkCksAzNjrtXJx3xXztBUnUXt21Hrbc+jruqqb9
        gk5dL7H5y/ta+Hfiz4dutAf4m+J7XXF1Ezy2dtp8zeTblNgf935aKDiRQCAeM81+iZRPBVFP6pBxta7e
        7v8AN9j81zqGPp8n1yopJ3slsrfJd/M+djx1r6E+ZJGYHvtoAjb5fu81sZBQBJEw9aAO/h+Fnj7QfClh
        48ttE1O00Xi4t9Ytcjy8NgSZU7kGRwxx2INec8ZhKlR4WUk5bNP8uzPTWBxtKksXGDUd01+emq9TU1D4
        1ar8TvEXhv8A4Wlq2o+IfDulSMzW9pHFHMyEAsoICZLFFBZjkDODms44GGFpz+pRUZy6u9v1NXmE8XUh
        9fk5Qj0Vk/0/4bY9o1Txx4z/AGzdSXwD4EsLPwh4M0q3WVrSaUohjRgqeaUU8DjbGoxwSScAjw4YfD5J
        H6ziW51JP+rX/Fn0E8TiM+k8LhEoU473/wCB+C8ty9/wgHgPw/oS+HfHn7Rmrajp6TC1bTNEnlktYWIx
        5bEeauBtP3goGDwOax+sYmpP2uGwaTte7WvqtvwOh4XD0qfssVjZNXtZPT0fxdutkjo/iT+wn4A8L/D3
        WfE+neLNbigsbB75JbjyblHCpuGAiJndwBg96xw2f4qrWjSlTjq7dV+rNMTw5g6VGVVVJKyb6P8ARHwy
        eOtfen52RUAA+Y4HJrE1Pov9gPw2dZ/aDtL4oxTSNPubvd2BZRCM/wDf4/l7V85n9TkwfL/M0v1/Q+o4
        cpc+N52vhTf6fqz6f/aD8R/HvUPiBD4e+GGkvYaLHFG0ustFAVlduWG+bKhVyOFG7IPXpXy+Xwy6NJ1M
        ZK8u2v6f8MfW5jPM5VVTwUbR6y0/Xp8rmVbfss/FL4iwxP8AEz4vaiIihWTS9A/dxkE92ARCcdcxn6+u
        ssywdBtYTDr1lr/n+ZlHLMbXSeMxL9I6fjpf7jy34/fAD4GfA7wRqNidc1Ofxu1tvsLeW7EszSEko0iI
        gVUOCMsBx0ya9PAY/McbWUlFcl9dNPvfU8zH5fluBoSi2/aW011v00Wlvl+J8XSTFvnZMTevavsz4ciL
        ALuJ49aADtntQB7h+yl8QPhr4C8b3dz8RtDj1O1kiQ2N9Nbm5SylUkkmHndu+XDYJUqMcEkeJm2HxVek
        lhZW7q9r/M9/J8RhMPVbxUb7Wdr2t/W59Q/Bf9rPxF8cP2lbXQ9Fij0vwFBaXLfYmgUzSoiYSR36od+3
        CqQADg5PNfMYzKqeCwPtKmtRtei8j6rBZrPHY72dPSmk/V7a+RyVv8SI/in/AMFGtAFtL5umaKbrS7U5
        O1jDaXDSMPrIXwR1AWuv6s8Nks295Wf3tW/A4vrSxOdwUdo3X4O/46fI9G+AmspqX7S/7QWpwOPKtnht
        2bsGi8yM/rEa87HQcMDhYvz/ABs/1PTwE1PH4uS/ur7k1+hgf8E5JSfg141Q5G3VHb87dP8ACujiH/eo
        en6s5uG/90n/AIn+SPz6hUu29hgf3a/QD85H7h65+lBkIoHd9lAHsUv7MvxD0T4X2fxLiihj0Ywreq8F
        1tuYYiRslK8YByCNpJ5BwK8f+08LUxDwj3220b7Hu/2Ti6eHWMja1r6PVLv/AEz279g3xV4m8ffGq+uv
        EGt6hrcWleH5ordtQuXmMO+eDhdxOMgHJ/2QOwrxs9pUcPhlGlFR5pJ6K2yZ7fD9avicVKdWbkoxtq+7
        X+QuqeFfD/xH+FP7QPjXVrKCXVbbxHP9g1Er+9hWN02Irf3SGCkd8/TEwrVcNiMJQpv3XFXXTW9zWdGl
        isNjK9SK5lKVn10tY7P9ta7kX9l34exb2xNdWLOc/exZS9fXk5/CuTI0vr9R+T/NHVxDJrAU13a/JnO/
        HP4T+DvhL+0V8F18K6WdLN7rFrLdxJKzo2y6gVCAxO0/ezjg8V04DF18VgsT7aV7RdvmmcWZYPD4TH4V
        0I8vNJX+TjYT/gpMqjX/AAI3c212D/33F/jT4a+Gr8v1J4q3o/8Ab36HxvuHlkZ5HWvtD4Ijx7mgD9Nf
        2RdJbU/2TtIso7uTTpL6LUIlvIgN8Ja4mQOueCQeRnuK/Ms4ly5jKTV7cunyR+tZHHmyyCTtfm/Nnjfw
        S/Y+1jwd8dpbTxrolp4h8Lx2NxLDfvH5trO2VVNyt92TDE7W9CQTjNexjs4hXwaeHk4zutOv/DHiZfkd
        TD41rExU4Wdnur3XR9f6ubP7Tv7GFrdafb618L9CihuoDIdQ0yC4bMwwu0xIxIBGGyoIzkYBNY5XnUoy
        dPGSuuj7epvm2QxqRVTBQSl1Xf0W35D/ANpH4P8AgPwF+zLpl/d+HLGw8XQ2tjZQ3dogtpZboqvmlwuA
        52rKx3AnjqDzSyzGYnEY9xjNuDbbT106enQrNsFhMNl3NKmlNWSa0d/lv1Z6p4+1x9b/AGL7rVZB+9vP
        CcMrgHOGeBM8/UmvJoU/Z5oqa6T/ACZ6+Jq+2ymVV/ap3++J+YR+fp8tfqR+NCHjrQBseFPB+t+OdYTS
        vD+l3Or6i6lxb2sZdgo6sfQDjk8cisa1enh4c9WVkdOHw1bFT9nRjzM+zvBX7P3xu8Y/DDS/BHifxBae
        D/CVuGVraL9/fTRFsiN9h2lACcDeOoBBxgfE18fl9HESxFGDnN/JX7rrf5eh+hYfLszr4WOFxE1CC7ay
        a7Ppb+mfUvji+8L+GfBE0PinU4dL0AxLaSSz3TW+8YwEDIVbJA6LyRntmvl6MatSqvYxvLfa59fXnSpU
        260rR83b8T48+DfhXwT4/wD2v11X4fWyp4N0KzF7+7heOMzhPLXAk+YZdtw4H3Dx3r6/GVcRh8s9nin7
        8nbfpv8A16nxOBo4XE5t7XBr93BX0VlfVf16Ha/Fz9lDxj8d/jXqGua5qtlo3heJY7ayMZM9wYExwE4C
        lmMjZLcFuhrjwebUMBhFTpxbm9X0V/6sdmPyWvmWMdWrNRpqyVtXb8u+vpoed/te/ALwF8F/hj4cTw8B
        Drr33lyPdXDSXN5F5bb3K/dAVlT7qqo3ep59LJ8wxONxE/a6xt8lr/XmeVnmW4TAYSHsVaV+u701/Tsj
        5Gr68+ECg2Ppb9lj9lvw78d9A1PVdW8R3lpLZXQt302wjRZFUqGWQu27hssANvVDya+ZzXNa2AqKEIJ3
        V7v+l+Z9dk+T0MwpSqVJvR2srfrf8j7Y+FXwK8F/Amz1GXw9azW73Ma/bLy7uGkd0j3EZz8qgbmPyge/
        QV8TisdiMc17V3ttp3PvcHl+GwCl7CNr76t7Hx98RviTo/7Rf7Tfw90/wtaFdH0+9hgFw8YjNwomEkrh
        eoUKpwDz14Ga+uw2FnluX1p1nrJbdtLL8WfGYrGU80zKhTw+0Xv31u/wR9A/Hj4T/Crx58TtEvPHni2a
        01RoI7G00Jb6OJZsyNtOzaX+ZnxkEZwOeK8DA4vGYehKOGhdbt2vb9D6PMMFgcTiISxVTXZRulf5b9ej
        7HQ63q3wx/Y98GRyQ6Z/ZNreSGOOKziaa5u5FUnDOxycDPLNgZ4rnhDF5vVs3drvol/XkdNSeCyWje3L
        F9ldt/13PzP8c+Mr/wAe+MdX8R6o7Ne6lcNO4Zt2wH7qA+iqAo9gK/TcPQjhqUaUNkj8lxWIli68q895
        P/hl8loYPby+/wDeroOUTIoA3tA+Jvi3wroVxo2i+I9T0nTLiXzpbayuXhV3wASdpB5AA98Vy1MJQrTV
        SpBNrujtpY3E0KbpUqjjF66af8E9K+BvwQ+MesavY+JvBFleaESpaHWrtxbxMjDqN/MikHsrA15mPx2A
        jF0cQ+byWv8Aw33nt5dgMxlNV8P7vm9P+H+6x9ffBrwdd/s93ninxN8UviRpF1qfiAQNdCaYRqJIwwBD
        OVLnDbQAg4A9q+PxleOPUKOEotKN7dd/67n2mDoSy/2lfGVk3O1+iuv67I8A8ZeNP2YNF8UXF/pnh/xD
        r95LO87XGnXU1rCjlskoWkRhyTjAxXvUaGcTpqEpKK2s0n+jPn6+JyWnVdSMZSldu6bWv3r8DltKX4Ef
        FvxLZeHLTw54k8E6nqs621rqg1D7ZEJ3OE81JCThmIGQe/UDJrqn/aeDpurKcZqK1VraeVkjkg8pxtRU
        YwlCUnve+vndvc8d+K3ww1r4P+Nr7w1rsQW6t8PHMgPl3ERztlQ91OD9CCDyDXs4TFU8ZSVWn/wz7Hg4
        3B1MDWdGp8vNdzjfxrsOEF+d8npQB9vfsR/tKeLNa8R+Gvhhf21ldaNbWtwEvmR/tKRxoWjTIbbhcbfu
        9No7c/EZ1ltGnCeLi3dtadNdz77IszrVpRwc0rRT166Wt93+Xzt/8FDvB3jvxHqOnarZaZNc+BtE08TT
        3Mc6bI7h5WVy0e7cSFEXIUgAnnrU8P1sNSThKVqknZenr95fEVDFVuWUI3pxV3qt/TyX5m34v8XaZ44/
        Yb8H69rcFxqum6bcadFq1tHJslnSCcW8q7gRgsOQcj7w5Fc9KjOhms6VN2b5reV1dHVVr06+UQrVlzR9
        3m7uzSZ6zq3xT8MfDX9ltPGPg7QvN8OW9ih07S3jKqPMkCASAknAdiWOSTg8nOa8yGFq4nH/AFevL3m9
        X6f1oetUxVLC4D6xRjeKSsvX+tTgP2aNVu/AX7J3i7xzqFr9kvNQn1LXxGsflKzFAqbAeikxjb2wRXfm
        UFXzGGGg7pcsf6+/U4Msm6GXzxU1Zy5pv/gfdofnIz+cxO7BPJJr9KPyhu+rJPM+tMB1AH2/+zN8OvCP
        wC8F2vxV+JV5b6dqd/GW0i1uBvkiiYcOkYyWkdTngfKp5xk4+EzTFV8xrPBYRXit7dX5vsvz+R+hZThK
        GWUFjsY7Se1+i8l3a+dtO5l+EvAlx+2R+0Hqfji9067sPh9bNEqG6XablIlCrCpHGWZWZ8E7QSM5INXV
        xCyfBLDRadV9ul+v+RlSwzzvHPFzTVFWtfrbp997/cfS3xy+B2p/Ge20fw4mux+HfBVptlurayi3T3Lr
        wkYHCoigAj73J+78or5vA42OCcqvLzTe19l/m/uPqMwwMsfGNFz5YdbbvsvJfefIf7WXxS0XT7Sx+Efg
        VI7Twn4ebF20DZFzcgnKlv4trFixPVyT/CDX12UYWpJvHYnWctvT+tvI+KzvGU4RWXYXSEd7d+3y6+Z8
        0f6zp8tfUHx4hIDYJ59KALPmL6igD6V/Ys+BTfEPxsvijVrVj4d0RxJGJF+S6uhyiD1C/eb32jua+Yzz
        H/V6XsKb96X4L/gn1fDuWvEVvrNRe5Hbzf8AwPzsfRXxa8Ew6l451Xx38VJLVPh34atjFpGjFxJ9sldc
        PJIv94tgKvUkL0wd3zWEruNGOGwaftZvV9kui/Vn12Nw8ZVpYrHNexgtFvdvdtd+iWp84fAP4r/C7wrp
        2qw678PE1zX5tWMmjwR2cd04jk2iOHfKeqMODjJ3fWvpcwweNquLp1rRUfe1a1W7su58plmOy+kpKpRv
        Ny91WTdnsrvsfZ/xn8YeJPA/gW1g8EeG5dT8TahIlrZWcFvvhtSRl3kIwqqoBGSQMkds18Vg6NKvWf1i
        doLVvq/Q+9x1atQo/wCzQ5pvRLp6vsj48+MWofGTUdL1XSPEPxA0bV5hGZNQ8M6TexC5ijQeYwaNEXcF
        AyyqzHAJOQCa+ywSy+Mo1KdGS7Sadr7b3Z8Lj/7UnCdKpXjLvCLV7b7WT289u58xSyLx833Ov+1X1R8Q
        OT5c542/doA98/YkQL8e7CYpuaGwu5EB9fLx/U187nz/ANja80fYcL/75J/3X+aPrb4dftN3Pjrx/aeG
        X8NGzWfzM3puRs+UH7oIBfkY49/SvisRgFSpOpzfI/T1O7sfHv7YGqunxmvo3b7sZI/77b/Cv2Lh1KOA
        hb+tD+deI4OrmFRvu/zPEv7WH96vprnzH1cP7WH96i4fVw/tYf3qLh9XHQ6sDNFhs/Ov8xUzfuv0ZrSw
        /wC8R+hX7Zrpa/sxWsqqqsbixBYAZ+7X4xww/wDhX+Uj9x4qhzZKl5xPzy/tdckbxkdq/abn4T9X8hf7
        WH96i4fVw/tYf3qLh9XD+1h/eouH1c+m/wBgjxDJpfjP4gXiL5qwaELkx8/MY2YgcV+ecYQVSlR/xW+8
        /VeBk6c6sfL9T6H+HX7Rup/EnxHpukXGm6TaWmowypMkNzJLPGwthKD90KVO7HtjB54r8+xGBjh4Oabb
        X3b2P1uM+Z2PzZtYxb20MKD5UQKv0AxX6ne+p+H47/e6v+KX5sf5g/uUHCO3r/eoAVxnpQAzzB/coAkV
        So2Y3/7VBkPZgpjCnJHWgAPy9eKAFRS/3RmgB+4etAB9oT0oANw9aAHSKT0GaAAKT0GaADacZxxQBLsX
        zM9qAEETPJlmwKAFNvt+6+aACgCPzvegBfMNAC7m9KAF3Ddtzz6UAIU29XxQAmGH3Wz9KAHCUNJllwKA
        HCMO21uD6UAN+z/7dAB9n/26AD7P/t0AO8r60ANEQkOGcOf9mgA+T1oAZJGD0oAikjB96AJcJ6ig1Idp
        9KADafSgCI8dSaAF/E0AIgx1oAI+KAHSxjGe1ADJLZT0oAk8pfUUAVpEP9+gBS6jqRQBDcSK3Q5rYCvL
        E396gBhUjqKDYjMYHXigCMhk+62axAbtOcY5oAkHzdOaDUZGpHUUAWBz0oMhFZnkyoyKAJFDF8ltj+lA
        E32qXyZI9o2Hp60AICDDkHL+lABQAUALH8p3ngf3aAE3N6CgB3lN6GgBApboM0AJQA4sM9aAPvz/AIJ9
        arFN4b8XaamBJBeRTNz97eGGfyUCvyzOqDo5hOp/Ok/uVv0P2jJcZ9aybD0rfwnOP3vn/wDbmeseLvgN
        qPjLVLy5v/iH4hWymmMselwmNbWJT0QrjLgf7Rr5WphZVZNuo7duh99hM7pYOlGEcJByStzO/M/O99Pk
        dF4C0bXPCzjS/wC0tN1zQ4GMIe2tktZrVgOVZI/kPbPAPOa3owlTXK2mvuPMx1ehin7VQcJvXVuSfnd6
        /mj42+Oei3nw5+NuoW6rEmj3lwL5POh81RG/LAKTjG7dx718zi4zo4lpfC9T9hySpSzLKVJ39pFcujtq
        tvwPF/HXwk1qy8SAaZp0l3a3yG5hECllRe4zzx6HPIrxq+DqRn7iumfouVcRYSeFtiZ8soOzv1/rqX/h
        j8K9Ug8WQ3uu6a1pY2KG5Vro7YjIv3Q/ByvqO9a4XBzVVSqx0WpyZ9n+HqYJ0cDU5pz00WtutvM+irTV
        ptSR5TpHgUDyzIsj6WAJW/urhepr6FPm1tG3ofkso+zfKp1e3xv79zjPibpJ+IHha70xtM0G21C2j+12
        sWi24tpvMHZvl+ZcZGD+FceKpqvTcLK61VtHc9/Jca8rxkK6lPkb5Zcz5lby10aPnif4Z+K7W2eeXQro
        Ii7mwhOP0r5x4SvFXcT9fhn2WTkoRrLU9Ih8N3vw28H2kGyAaxfMtw/mQb22c8A5+VRkduTnPSvTjSlh
        aSUfiep8NVx1LOsZKcm1SimlZ217+bf9bn158G/Bt9of7PH2cXtppWteJy7far9C6IsgIA255xErEA8f
        hX1GGpOOGs9HL+vyPx3OMbTq50p8rlTo20Wj08/8W7OQ1r9mXVG0a50ey8/VdPxHHb6xbXgheSzgiVoI
        jGvEkvmEr5p7D6VxzwEnFwWq736Lb1Z69LieCrLEySjLVuDjdKcnaTu9o215V1PfvhR4S1LwD4SvNM1O
        +N7DFeXE9pNK5eYW7sXUSserglske1evh6cqNNxm76v7j4fM8VSx+IjWpQ5W0k0tuZaOy7H55fDj9pHV
        /gx8QvG+saTZwalFrks26C5YhBJ5rNHIccnbucYyM7jyK/UY5dDH4DDRm7OMY/8ApKuj8ar5nPLM2xrp
        x5lKc/wk7M6X4d2nxN/bE8dLBr2t6i/hWGUPqLxExWcMed3lIi4UueAM5I6nOKeJeDyalelFc726v19D
        HCfX89rfvpv2a3tovTTd+t7bnWeN/wBtbxF4F+NN5Y6JaQN4J0ORtJTRXQL5yRHY0gfBZWyp29guMrnN
        clDJKVfCKVR/vJa39en+fmduJ4hq4fHOEI/u4+7bvbrf8vI5X9q343eDPifqvgjxN4K86z8RWiyyX0r2
        5hmhYNG0Ks2MOysJCCrEDPvx15TgcRhY1aOI1i9tbp739Ohw51mOHxcqNfC/Gt9LNbNX72d+rX3nuOjf
        8FBfAreD9KvdY03UpvEqxhbmztLZCqS4wzo7OAEbqOc9iK8KfD+J9rKMGuXo2z6SHEuE9jGdRPn6pL9d
        rfM88+LH7fFp458Ga74a03wdNbw6pZSWhvbq/AaPeCpPlrGc8EfxD/H0sJkEqFWNWdTWLTsl287/AKHk
        43iSFelOjTpO0k1dvvptr+Z8fV9ifBWY7zB5mdnFAWZZ0q/l0jVLO/hSOSW1mSdEmXcjMrBgGHcccion
        BVIuD66GlKcqVSNSO6af3H0b4q/bX8SfEXX9EsLqSbwb4R8+FNTTQpiLp4tw8xlm27lwucKoHoSa+apZ
        HSw8JSXvz1tfby0/zPr6vENbFVYQl7lO65rPW3XW35a+Z9H6V4d0mXVbW/8AB/ws1PxVqsiIyeJvHdxL
        GkS87cNdb5+OwSID5sg8k18zKpPlca9ZRX8sEv8A220fvZ9dGlTUlOhQcpfzTb0+cryXoo2N/Xdc+JNh
        8RPBej/8JR4b3ajfBr7RNO05vNhso0MkrmSSRiVO0RhtifNIuB2rGnDCyo1JuEtFo29LvbS3z3ex01J4
        uNenBTjZvVW1SW7vzeivbqjz79vf4zQ+GvB0PgSxdH1PWlE13wG8i1VuPoXZcD2VunFelkOCdWr9YltH
        bzf/AAP8jyOIseqFD6tD4p7+S/4O33n59ZFfoR+YhkUAA+bpzQB9nad8XZv2b/2SPCFrpXlr4q8Tm5uo
        JGXIt42c5mxjBIQxAA8ZOeQuD8TLCLM8zqOfwQsn/l+Z+gxxrynKaSh8c7tfPW/yTR5N8Bvgvq/xO8E/
        EXXLDSP7e1aG2isNOhnkQbriaVTLKGcgBo4gxySPv+tevmGNp4atRpSlyxvd77LZadG/yPEyzA1MVQr1
        4x5pWsr23e716pfmfRH7JH7KHib4U+NJ/FXi02MMq2bW9pZW03myI7kbmcgbRhQRwTncemOfns3zaljK
        So0b73bZ9LkuTVsDVdeu1e1kl+J7D8JfgRD8Pl8ZXWsX1v4k1bxRfSXV5dS2exfLbJEJVmbcoLOeozux
        jivGxeOeI9nGC5VBWWv49D3cHgVhnVlN80pttu3Ttu9EbXwp+Elt8KvhjD4NtNSnvIYxOBeSIEkzKzMS
        AMjjdx9KxxeKli67ryVm7aehvg8JHB4dYeDbSv8Ai7ny7qv/AATdn89v7N8dRm3J+VbrTjvUe5WTB/IV
        9TDiTT36Wvk/+AfHz4VXN7lbTzX/AAT5i+Nnwi1D4J+ObnwxqFzHfMkSTw3cSFFmjccNtPTkMCOeVNfT
        4HGRx1FVYq3Sx8nmOBll9f2MnfS6ZwioyMFAMjE4AAyTXfseYk27I+tP26/jVLd6nbfDDToLcWGkJBLf
        TlN0hn8sFY0JHyqqsMkcknHGCD8fkOCSj9cnu729O59zxHmDcvqMNlZv16L9fw7nmHi3w3o3wVj+FGn6
        9pMN3qcskfiTX4ZoA0jW7yqI7U7uwjifch43Oc9q9SjWqY54idKVlbljr1tq/vas+x5tejSy9YalVinK
        6lPTW19vSyd13PqbwN+1P8PT45s/DXwx+G1zcxXl1FDPfaTpsVnGiuQDKVRd21c8lwvCnsK+Wr5XivZO
        ti6yTSejbb06f8Nc+tw2a4R1VQwdFtNrVRslfr/w6PafjnqXxE0zwYjfDLSbPVvEElyqOt5KiCKHaxZ1
        DuilshRgnueDXjYKOGlVti5NRt07/iezjp4qFK+EipS8+34fmfGfj79mf9or4vXVpqHi6S21C4hVvJhn
        v4EW33YLBUj+QE4GcdcDk4FfY4fM8rwacaCav5PX79T4zE5VmuOtLESTt0vtf0VjwP4w/BXxR8FNatdM
        8S20Mct1bi5imtpPMiZckEBsDkEcjtkeor3sHjaOOg50unc+cx2ArZfNQrW17bDfgt8N1+LnxU8P+EpL
        trCLUZnElwihmVEjaR9oPGSqEDPcjrTx2JeEw86yV7fq7E5fhVjMTCg3ZP8ARX/Q+3F/4J0fDOdGWHxH
        4meVeCRd2rAH3Ag/rXxn+seLW8I/c/8AM+5/1Ywf88vvX+R8/wD7WX7Ovgn4B6RocWh6zqWo67qFwxkg
        v54m8uBV+8FRFIyxUZOc4OO9e9lOZYjHzl7WKUUuie/zbPn84yvDZdSj7KTcm+rW1vJLyPmuJT6V9PdH
        yJ9sftT/ABnn+FHw08OfBvQZAtyNDt4NXu2GXWIxhfKA7FwCWPoQB14+GynBxxeInj6u3M2l53vf5H6D
        nOOeBw8Mvo78qTfla33v+tzzPwJ+zL4k+IX7PVjq3hzQ01PWtY1/cJ3mji+z2UEcsZO52HDSu2QuSfLX
        g4FepXzSlh8c4VZWjGP3t2f5Hk4fKauJy6M6MbylL7oq6/PsfUH7NP7MPiD4Q+AvGMF/qlnZ+KPEEH2e
        C5td06WSqjhG5C7m3SFiAcfKvNfMZnmlLG1qbjFuEej0v379j6vKcqqYChUUpLnl1WqXbt3O08O/szaN
        ofwAn+GUlzFcLdRSfaNUNou5p3YnzghJwyjAU542iuKrmVSpjfriVrbK/Tt/md9LLadPBfUm7prV+b6/
        5HS+IPhBba78E0+HH9q3VtaLplvpf9oIqmYpEEG4g8ZYJg/7xxiuani5QxX1rlV7t26anTPCRnhfqnM7
        WSv1PlO6/wCCauo+cRB49tXixw0mmMrZ+glPt3r6xcTR60fx/wCAfHf6qv8A5/f+S/8ABPkLxn4UvfA3
        irV/D+pKFvdMupLWUrnaxRiNy5/hOMg+hFfX0K8MRSjVhs1c+MxGHnhq0qM94uxiswSTKnirMj7p/YC0
        W18CfDPxv8SNbb7JYsfKWZxgCC3UvIy+uWfb9Y8V8Ln9R18RTwtPVr83/X4n6Hw7SVDDVMVU0T/Jdfz+
        4+hP2fPirrHxj+FMnim5sre0vJ7u7S0gTITy1ciIMSeo4Unvgnivn8fhY4PEexTvZK/3an0eX4qWMw6r
        tWu3b0u7HPfBnwp8d7LxpNq3xG8XaNeaFJG6jRrCFSVY8qVYRJt28clnJGc881vjKuXypKGFptS7v/h3
        +hy4KlmMarni6iceyX62W3zJPjr4V+CHh7Xrfxv8TbOyGoTRi1hkvPPmEwTnAgTIcgMOSp4xSwVXH1IP
        D4Ru2+ll+P8AwS8bSwFOSxOLSvtrr+HX7j5j/at+L/wR+Jnw2tbPwlGYtf0mZP7OW10trWMxEgSRk7QA
        m35gPVR6mvpMqwmPwuIcqy92W+t/TqfNZtjcvxWG5aT96O2jXr02sfHckYZto+7619gfFDf4Md6AHCMN
        05oA/UX4JfFTSfAfwQ8LeJPiFpOieAX1WdbGyaxszCksZTMckiqv7vcEYkk7cBTkZwPzDF4WVbFTp4aT
        qW1d9fX1P1fCYqNHCwqYpKnfRdF5eh458VdI+H/7Ln7T/wAOvHWlQtbeHL+1vLq6trBvPXc0UkYkiBb7
        recvAO35ePSvXws8TmWArYaWsla19Ouz+48bF08NluYUcStIvmvbXpv+Iz4V+KR4L+Bnxy+LbRy2L+Md
        SuIdGSbBkkZ3lEZABIJDzvn/AK5N6U8VS9tisNgt+RLm/C/4L8QwdVUcLicclbnb5fvdvxbO2/4J5Wdj
        afBfxIseq20+pXN/LJcaeDiW0AjCLvB5+baTnGO3UHHFn8pSxUdNElZ9+p2cPQUMI9dW3ddumv3XPzsS
        Mjq1foh+aixHH+x/uUGdiYIB9z5f96gLH1r+2p8Vbq71vS/hHoAkj0fQIbeC4hts/wClXHlr5ce0dVQF
        QB/eJ44FfJZJhIxg8dV3le3kur+f5H2efYyU5rAUtla9ur6L5fn6HVfsoWmlfBD9oTxV4U1S/itZovDs
        D3U9zMojW6VIJZ41PHCmSTHfEZNcuaynjcHTrxWnM7emqX5fiduUQhgcbUwzevKm+10k3b7zkTOfCf7A
        c32reLrxh4iMgLHLPsdSWPt/on5ketdiXtc5SjtTj+n/ANscEmqWRty3qS/G/wDlE9R/bUudOt/gJ8Nb
        Z7mO7t0v7QN5EgZpIltXDMuD7j8xXl5IpvF1mlZ2f33R6+fciwlFT25lf0s7nmfxz+M2jfFf9qX4f3fh
        28+26Ppd3p8EdwY2jEkn2oO5AYA45Ven8Jr1MDg6mEy+sqqtKSl91jx8wxtPGZnQ9i7xi4/fza/odX/w
        UrULqvgB+5hvR+TQ/wCNcvDW1X5fqdHFS1o/9vfofGG08f7H/j1fanwIY9zQB95yXx8Nf8E5oniUxyTW
        YjUA4OZr/BOfo5NfAKPts7s+/wCS/wCAfpbn9XyFSivs/m9/xue4fs06l4juPgt4Vn8ZXfmaveREwNcH
        E0kJy0Qcnln8sbj3x15BNeLmUaKxU1h17q/p/K572WSrvCU3iX7zX/DX87bnhmhw+N/hR+2hceGdJ1WX
        VND8VSnWbuC8y6rA28u5/uuhjZFYdQEBz0HuVHh8VlSrTjaUPdVu/wDwb3+88Cn9ZwmcOjCXNCp7zv03
        /K1l5WR6j+2D8G9T+MfwzjTQ5jJqmjztexWIPy3eFKsg/wBvGdvvkd8jzMnxkMFiL1NpaX7HqZ1gZ4/D
        ctJ+9F3S7+X+RgXLSXP7BTKysssXhnymRxgqY/lII7Y2n8q2Vlm91/P+bMZJ/wBi2e6p/kj84K/Sj8is
        wkcHoaAszrfhX8SNS+EvjrTPE+lKstzZs26CRiEmRlKsjY7EH8CAe1ceLwsMZRlRn1/A78Di6mAxEa8F
        e3Tuj7b+EPj3xLo+jf8AC0fjB4ovLS31KT7PoXhyDMSSbzgMLdcbyc4XdnauWJ5BHw2MoUZz+qYGF+XW
        UvTz6edt3ofpGBr4iEPrmYztzaRjtv5dW+l9lr6egftLfEn4c+EI/DejfEfRjrOmarNLLHiDzRatGqqZ
        SMhv+WuMrzyeDXDluGxdZzqYSVnHzte/T8DvzTFYOgoU8bG6k30va3X8Ty/wR4/0HRpfGFj+zj4Cj1yU
        W0V3fancXbxRK7BvLSOKb94+MudmUGQwHbPp18PVn7OWa1eXWyVrvz1Wi9dTycPiKMPaxyaipOybd7K7
        2Wur9NEtdjv/ANl34veK/ib8MPEEniWNE8SaJcy2Rlkg8lnYRhgZUwArBiQQAOnSvPzTCUcLiIqi/dkr
        9+vRnpZPja+Mw0niFacW0+nRbroz84fFvjHW/HmuTax4g1O41bUpuGnuGyQOygdFUZOFAAHpX6VRoU8P
        D2dKNkfkuIxNXFVPa1pczMatjmA8daDY6PwT4x8WeF72e38KalqOn3mpoLR49MkdZJwWG1QF5Jz0xzyQ
        Oprmr0aFVKVeKajrr0OzDYjEUZOOGk05aadf+D+J+hX7OngXW/gv8GfEmo/EvUJJUuEk1C6tp5mna1t1
        i+ZWOTliAcqvtyTX51mNaljcVGOEj5Lpd3P1DLKNbA4SUsbK71bu72Vtjxf9kmxsfil+0nr3jfTdAs9A
        8P6PbN9jsbWJY0gaRfKiBCgAsUErMfXPtXt5tKWFwMMNOblKT1b621f42seBkyhjMwqYqnBRhFaJK1r6
        dOtr39T0mx+APws1T47jW9T+Ir+IPGcmpnUY9ITUIM+YhMqRsgBfaiqPlyPlUduK8x5hjI4P2cKXLTta
        9n6b7anrLLcDLHe1nW5ql78t16rTfRfgjv8A9oL4hfCTwxe6Pp/xLtINRuCrXNnbz2LXIRSQrNgAgZK4
        564rgwGHxtVSlhG10etj0MxxOAo8scbZ31V1f9GeM+MvG37M3xI8D6zoelR6H4b1eW0drO9Ghm0eOVRu
        Q+asYzkgAgt8wJHevZpUc3w1WNSfNJJ6rmvp6Xf5aHh1a2SYulKlT5YtrR8trP1svuvqfDOflxn93/d7
        194fnBHj3NAH1R8K/wBnnQJv2VvGHxB1FYNT12fTrqSxUuGWxSIkZwDjzGKE5PIGAADnPyWLzGr/AGjT
        w0NIpq/nf9D7bBZZRWWVMXNJycZW8rfrp6rY8o+Cdr4h+MvxA8NfD/UfFmuRaFdh7cwJeyOkUEcLuURG
        JUDamMYwPSvWx3ssHRnioU48y12W7f3nk5fKrja8MJOrLld1a72Senboe4/Ffw18Df2Wru20c+FLz4ge
        MZIVlEOq3TeTGjHAMm0BMnBwoQnjkjIJ8LC1cxzROftPZw8v06/ifQ4qnlmUNU/Ze0qPo/P8PuVz3u5+
        BXwr8V/Ca31rxT4B0rwYsunLf3v2eMWs2nnYHYGRAp+XngjtgjtXhLHYyliHCjVc9bLrf5O+577wGCq4
        dTrUYw0u+luu6tsfJnwx+LPwF+EXjCXVbPwn4q8Q3FpKWsNS1Oa3kKEHh1iAjVTwCCdxGc8HivqsVhcz
        xlPklOMU90r/AJ6/5HyWExmVYGo5whKTWzdvwWn5XMj9rH9pTw/+0H/wjx0nw/c6XcaZ5wku7x08x1fb
        iMBc8ArnJPU8d87ZTltXAOftJpp20RhnGaUcxjBU4NNdX+R85l2HWvoT5g1PDepW2ka7pt/eWkeoWltc
        xzS2cwyk6KwLRt7MAQfrWdWLnTlGLs2nr2NqM406kZzV0mm138j9UvhR8QfgnH4ug8M/D7+xI9bvLU3L
        Lo1kBmMDJDzKu0sP7pYkY5FfluKoY50/bYm/KnbV/oz9bwtfAKp7HC8t2r+6v1Wn6nzj+3b+0hrR8R6t
        8MNHKWWkQRQrqc4XMty7Ksvlg/woAyZxyTkZxwfo8jy2m4RxdTV9PLpf1PmM/wA0qRnLBUtFbV+utvuP
        Pv2b/wBpjw78Mfhz4n8GeNtCufEuh30oubWzREkRnIAdHDsAq/IjAgHBDHGTXfmWWVcTXhXw8uWS0b/X
        Q8/K82o4XDzw+Ji5Req6+q1+/wC8+zrj4l6tpX7NGleLfh94E33k1nBJY+G7eFpFhjdgOEiALqAd3ygZ
        HPFfHRw0J450MTU0u7y/4c+3liZwwKr4and2TUfX07eR84/tJ/tJeONe+C9x4Z8U/DnVfBmoarcRI9/I
        HW1lhU+YUVmUEOSoBTJ+XJJ5xX0eWZdh4YtVaVZTUb6db7fd59z5rNMyxEsI6Nai4OVtelt9++lrdj4u
        j64719tdH5/ZklF0FmS0XQWZ618FPino3hr4mafrPxD0yXxnpcUH2VRfOblrTBGyREckMFwRtPADEjkC
        vHx2EnUw7p4R8j300v5aHu5fjo0sSqmMTmttdbeav/XY+4/AP7S198ZvFa6L8N/C7R+H7QgXviHV0KW8
        KDHyxxIRuYj7oLA9yMA18JiMtWDp8+Kn7z2it/m/+HP0DDZo8dV5MLD3FvJ6L0S6v7rHrnxE0PxD4m0U
        aToGqxaCLttl5qYBa4hh/iEC4xvYZG5j8vUAnp5WHnTpy56kea2y6X8/L8z168KlSHJTly369beXn+Xm
        fG3iCC8g+Ln/AArP4Q+DNJ1bQ9F8uLWnv7GG5F9IT+8N1cSAkBclQAQQwbaOAB9hT5XhvrmOqNSl8Nm1
        btZL+tj4uo5xxf1LL6ScI257pO997t/8Pv2PHv2ovgzD8FPilcaZp+86JfxC+sA5LGNGZgYiT12spA77
        dueTXt5VjXjcPzT+JaP/AD+Z85nOAWAxPLD4Zary8vl+Vjx+RVK7gfmr2TwRuRQB+jf7Nn7SGt/Fq/0z
        w/pngW20vSdNtlGpapHcFbeIhcBYo1jABY4IXdwM+nP5vmWW08GnUnVvJvRW1+bufqeVZtUzCShCjaKW
        rvpfslb9f+C39tfwTaa74Wm1rXvGo0fStMsZG07QljUG8v8AnaSxbLZGFwF+Ubjnk08kryp1VTpU7yk9
        X2iGf4aNWg6lWryxinZd5dPXta3zMb9jzQvhH/wh/h/Wlh0yPx1LK1q41G6Elz9oUkgwxsflypDAoucH
        GTits5qY72s6bb9mtdFpbz/4Jz5FSy/2FOtFL2j01d3ddr7aa6dD074j/GTxGfiHcfDjwFo9nfeKBpba
        hLf6ncmK3tVPCjaqku3zKcEgfMPfHl4fB0vYLFYmTUL2slq/8j2MTjav1j6nhYpz5ea7dkunRNv8PU+X
        Pgh8Rfh38H9d1u3+Inhef/hPNMmuopNZSVrzz5NzK8e3cVRzuZd4GCOpHf6rHYbF42EXhZ/unbTa3+aP
        jsuxeCwFSccbC1aLd5b3f6PXt6s+XAS4+ZMV9WfDjpOelAHtH7HWqx6f+0J4binx5N8txZsD33wvgfmB
        XhZ3DmwU2uln+J9Xw1NRx1n1T/zPeLDSIvBXxM8Fmz0z7ItpryW7i2tQ8gicPEAWY7ljG7PT375r5Zz9
        rRnzO94339H95+o2s0eFft+aXJoXxfiuiCsV1E4B9SG3fyav0Phusp4GKvsfi+fYblx1TTr+Z8y/2p/t
        V9XzHzvsPIa+rbELbugzRzDVC7tY+7Phx+yB4Zk8NeH9e1Lwv4j8QC8toL3NrqcIifcobBjwDjnGCa/M
        sXxDi/aVKUKkY2bWzv8AefpOE4dwqpQqTpyldJ7o7rW/2bPhhrGo3N7N8K/FmnTTAYj0/AiiIHBRRJge
        teXTzrMKcFTWJi15/wCdj055NgJzc/q8k/L/AIc6/wAX6GvxH8M2/hrxZoPi3VfD8DxyC1g0lLd5DGMJ
        ucSdu+Otedhq0sHVdfDzjGeut77/ACPQr0Vi6SoV4ycFbS1tvO5z1z8APh3d6To+nRfCHX3g02XzVaQp
        E8+c/LM+/Lrz0PpXYs2xynKbxS978PTTQ5HlOBcIwWGfu/j66nzP+1h8BtK+EWhWPiLTNI1LQY9Sv2gW
        xvL2OdEBXdhQoyoHTkmvssizetjajoVZKXKt0mj5DOslo4amq1KDjd7XTPmX+1P9qvtOY+M9h5B/an+1
        RzB7DyPrv9h4tovgX4u+LpbR72G30lbVIEbaZWIclQe3Vfzr8+4qn7SphqF7Xbf5H6HwhRcHXqeiPQfg
        Fqhtdcur+91Jr228OaFqDWMCwSRrZwIq53M3JVs/LuyTgmvlsZG8VCMfikr7av8Arc/Ro9z4s0gu2m2T
        yHLmBCx99ozX6I99D8PxclPEVJLrJ/mWNp9Kk5AMgXqmKAJMfLnPHrQK6IqAuhySEe1BmWPLHlZ/j9KA
        GhggzncKABmY/d+WgBNwxnPFADt/GdnFACHjrQA/zKAFjZovujf9KAFG8pgDJoAk+0f7FADfO96AATZ6
        GgB+4etADMJ6igVyTavqaAuAUt0GaBhsXGeN/pQACDc2GbBoAkjCetAAGQ/w0AIJ9y7AmT/eoAj+f0NA
        Cbn9DQA7bJ/dNACGKVepIoAIPlbceB60AL5q4zt4oAZ9p/2KAHfaI/QUAQ7h60GobhjPagBPNX+8KBXQ
        Oc9EoC6Idp96Aug2n3oC6GykD7hzQF0EjMY8Ac0BdCbzQMXLelADpHBXcEyPWgCpLJGDgo2aAGb+cbDm
        tgGysPWgCOXrjvQa3RFL93d29aAuiOsrMYfx57UWYAfl+7z9KLGl0JuHrRYLokiYetIzHspZdyDA9aAH
        xERjcTuagBMt6UATpIB1WgBArnpIKAEoFdC7T6UBdCUBdFugLoi/1nTigLoj8tv7poC6E2p60DPqb9hj
        xqnhz40XejTOEg1q1eFMnA81DvX9Aw/GviOJKPuUsQumj+e34n6JwliOaNfCN9pr5aP8Hf5H0x+0z4s1
        HRItOsY7rTLLR7yCdb7+27ryLW5THKBkHm+Yv3hswPWvzXG1JQSSaSe93Zf5n7Xw5hKWIlOo1KU4tcvI
        rtPu7+7Z7O5yvwg0XxLrVxpcLeLNRsPD17Ck0Uun2H2aW/mgRFZ5ZG3HDrjkY3eXzzWGGhVk1ebUfS1/
        U9HNa+DpRnagnVTad5cyipNuySsvd+drneftI/DBPG3hiDVba0a61PSSXMEQBe5tyR5sYz3wNy+4rqxl
        D2seZK7X5Hh5DmP1Os6U5WjPr2l0f6PyPmO7+MEsPjufSfD1y2gfZrcQafdyDYJVK5bcD0AIAwOW2ivC
        liuWs6cNLbH6PDI28DHGYhe05neSWrWun39+hynxK+Knxo0fS47bVNXW/wBJuY/NFxbWwDMnfeNoYY6c
        iuTE4jMKas3dPsj6LKMp4YxlS9OLjUTtZy0v5O9vMv8AhPSvi5qng7SGl8QafoWnxsb3TrS/X97uOCjc
        A/K3bP5VrShjpQTc0lul+Ry4+vw1RxlSMKEqktpOL08/n3OV8TeOvi74H+Is0tzdtJrtyBOl3bRK8NxH
        0DrxjZ144+lclSvjqFZ31flse5g8t4ZzDL04K0FpZv3k/PzPRrz4n/ErS9FupvHHiO3W0nt1Z7C3iCsV
        boAcANkdVBzg9q9J18TTi3iZL0PjllmT4uvGllNGTadrt6afirdGdJ8ONIi/aFu/C7tpk1k8YdtXmUfI
        tsp+VA55JlIGPQbq6aH+28r5bd/Q8vM3LhyVen7RSWnL/ie7t/d/F2PfPjXDq2paNBo2iaDcXmmWhjnl
        1PS542uLF0OAkdu2PMbaeVJAKsR3r1MVzuPLCN0uq6fLqfFZNKhTqutXqpSd1yyT5ZJ73ktvJpb2Z434
        V8Sz+ELjb4b1yz0bV5iY00q5tp7exvXVhlVtZTmOVmeNP3bYGHI4rzac/Zr93KzfS1k/l0fofVYrD/W1
        fFUnOmteZOLlFPvJbxSTeq7X1PffjT4yl8C/BPXtXv2ii1BbAw4hJCefINny55wC2foK+hjTlWcaS3k0
        vvPzelKnSqut9ineWvaOv47H5KS3XmSO/l43EnFftdOCpwUI7JWP59rVZV6sqs95Nt/PU90P7ZPjix8G
        ReGPDljoXg/Tok8tH0KzeOVR3IaSR8Me7Y3ZJOc814f9i4aVX2tVym/N/wCSR7j4hxcaXsaMYwX91f5t
        ns37I/wD8C+PPhrP428V6RL4i1b7dcZFxLI6kIAf9WpAdiST82ck14ub5hiKFf6vRlyxstv8+h9DkeWY
        XEYZYqvHnm297v8ADr876mj4n+MniD4Z+GbjXvC/wCs/C3hS1eMyXur28dvMd7BFLQoFZSSwGct1FZUs
        FSxVRUq2K5pvorv8WdVbH1cHSdWjhOWmrb2W/wDdWp7jpt94P+MfwUs/FmteGNPu9OudOe9ktLmFJPKK
        Bt6q5AIIKsAwwfpXhSjWweKdKnNpp2uj34So47Cxq1IJxkr2ep+UEzJJNI6IIkZiRGpJCj0GeePev1pK
        ysz8Vk022lYMimIMigA3N6CgDo9E+G3iLXLXRL6Oxa10rWNTTSbTUrs+XbtcMQMbuu0c5YAgYPcYrkqY
        qlTcot3lFczS3sdtLBV6sYTStGUlFN7Xf9bn33D4C8TaHp+keGPHvx9fTRKkdlaWGjrb2V5OT8qjz2Bk
        Y9FB2joMnJr8/delOUq2Gwt7atu7S+Wx+m/V60Ixo4rF2vorWi383dt+lhNM8X/CD9mPxxJoUdjr58S6
        rKsVzql3Zz3M0wJGD5r4LpnH+qDZPqRRKjjsyo+0bXJHpdJL5Lb5hGtgcsreySfPN7tSbfze/wAj5s/a
        Dt5tG/advdY+KXh28n8O38pMEFjdY820VfKjeJx3G1WKfKck5xnNfTZe+fL1TwU0pre6676/kmfJ5mlT
        zN1MfBum9rPptp+bWm/3+3aR+xV8H/ip4et/EHg7xFrMVhdJ+6aC5jljRucq6PHvDDIBUsCMfjXiSzrH
        4WbpV4q67r/J2PdjkOXYyCrYeTUX2f8Ammz4W8S6L/wjviLVdKM3nmxu5bUyhdu/Y5XdjJxnGcV93Sqe
        1pxqW3Sf3n51XpexqzpXvytr7mUCQ/8As1qYns3x1W+1S2+Elnb281ykvhGxitIokLeZK0soZVA6sWwM
        Dnp7V4mXuEHiJN29+V/TQ+izNVKiwsIq6dONvX/PY+iG8C+MvhV8MPh58LfBt+2k+N/Et5NqWrXltx9n
        iCDzCzjJAUNEuRyTHgdcV859YoYvEVsZiFenBJJd30+/V/M+pWGxGDw1HA4aXLUm25Py6v5XS8zsv2g/
        hf8AEjV/hl4a+Hvgn7VrNlJxrWualqaiaXB/5aGRt7KzMzttzwoUDHFceX4nCwxE8ViNGvhSWny6adDs
        zPC4yphoYTC6p6Sk3rbz6u/W3pYx/wBov4Dpov7Nfhrwz4e8P33iPW9CljSzn06FnliZiXuJSq8lXIPG
        D8zL6Vtl2Pc8fOtVmoxle99vJfL8jHM8vUMujRoQcpQta2/m/nr8y78a9e1r4MfscaPZf2hc6f4lmtrL
        TmuEmYTpMwEkwD5znakgzUYGnTxmZyfLeF27dLdP0NMwq1cDlSTladoq99b9dfvPkHwt+1V8U/CTxfZf
        GV/eRIc+TqbC7Vh/dJkDNj6Ee2K+wq5Tgq1700vTT8tD4WjnWPoWtUbS76/i9fxKPxy+O+r/AB31HR7/
        AFrT7Cxu9PtTbF7FWHnZbcSdxJAz0GeMn1q8Bl8MApRhJtN9SMxzOeZODnFJxXTqed2t/Pp+pWt3GqSS
        W8qyqrdCVIOD7cV6M488XF9Ty6U3SqRqLo0/uPvbQf2TB48+PV18T9Y1Wx1TwVfzJrWnwROzyXO9Q8ay
        DAUIpx3O4ADoTj8/nmroYJYOEWpq6fl3t5/kfpcMnWIx7x1SScHZxt10Vr+X5jvjV8Zf2drPxSfEGraZ
        D8QfEckS2vl2i/aoo0QtjcJGEQ5z0BJznGDmjBYPNJU/Z026cd9dPy1/QvHY3KoVPaVUqkttNdvXRfmc
        n4d/b4juPEmh+HfCvw+0/QtLur63tMvP92N5FUlY40RVOCcckfyrrqZC405Vq1W7Sb2/Vs46XEUZ1oUa
        NKybS37+SX6nc/txfHzxj8HH8JWXhDUo9Ll1FbmW5ma1jmchDEEA8xWUD5mzxnpXFkmAoYz2kq6va1tb
        b37HZn2YYjAqnGg7c19bX2t39T500/8A4KAfFi0nWSW40e+QDmK4sAFP12Mp/I19DLh/BtaXXz/4B84u
        JMaukfuf+Zh/tBftSXP7QOgaDZ6j4bs9LvdNmeU3dvOzlgygFApHygkAnk/dFdGX5WsvnKUZ3T6WObMs
        3/tGnGDp8rTve9/0PDFle3YtG7biCpKnBwRgj6EEj8a9xpPc+fTcdULBNJaTJLG7LKjBkdDhlI5BB7Gk
        0mrME3Fpp6iSyPcSM7MS7EszMckk9SaaSSsgbcndjo2A6mgxPd/j34L134nftbeJPD+lWzXOp3+oRxwj
        B2pF5Ue12OOEEeGJ7AV8/gK9PC5bCrN6JP77v9T6fMsNVxmbTo01q2vkrLU+ntf8JeKtV+IfhT4PeBvE
        d94e8J+FdHtpPEGo6fMYZnLscJuXDCR1TcMED94xOcYPzNOrRjRqY3EQUpzb5U9vX0V/wPrqtKvOvTwO
        Gm404RXM1v5Lvd2/Es/tHfBn4hfG/wCIvhnwzbWzad8MtOWNrnUTfIWmY43kxli7MqjauVxksScGll2M
        w2BoTqvWq9lbb9PUMzwWKx9enRWlFat338rb+hkftifBjUPFvi74dnwj4d1M34YWF1rWnK5W0tgyrGHI
        6bd0h3cYHBzkY3yfGwo0qyrzVt1F9X/VjLOcFPEVaLoRfNezkui/q/8ATJP+CgPxN1bwP4f8H6NoWr6h
        pF3eXEt1JcWF08MhjiVVCsykEgmXOPVM9hT4ewsK9SpUqxTSSWqvv/wxnxJi6mHpU6dKTi227p20X/Dn
        zF4O/bK+LHg6WHHiZ9btoxtNtrMYuFcf7T8SZ99+a+krZNgq1/c5X5af8D8D5ehnuOo2vPmXmr/jo/xO
        C+LfxJuvi58QNT8XXtlb6fcX/l77a1zsGyNUByeSSFBJPrXfg8MsHRjRi72PPx2LeNryruNr2H/Bz4R6
        38afG9n4e0aJgHYPd3hUmO0hz80jf0Hc4FTjcZTwVJ1J/Jd2VgMDUx9ZU4bdX2X9bH1n+3Ld2nwp+Dfg
        n4aeHbhbTTpGPn2qt+9lhhAKl+OjSMWJ4yy9+cfJ5HF4rFVMVVV2vzf/AAD7LP5rCYOnhaTsnpbyX/Bs
        dVovxRi/Zk/Yn8IatDbrc6tf24GnwyglGuLgyThnwQdqqSTyM4AyM5rknhnmWaVIN6J6+i0O2GJjlmVU
        5pataer1+4881L4FfFP47/A7T/H0vjbVtR8SXyvfL4dmmMVq8G4+WIVUhVcqAwyMHcBkYye+ONweBxbw
        /slyLTm3d+t/I4Z4LG47CRxPtXzvXlvZW6Wt1t3On8O3iftm/s8X3g/V5Fs/ib4Ybhb393I00YKrI46g
        OCY34+V8nH3a5qi/sfGqvT1pT7dn0+W68joptZzgXQqaVYd+66/PZ6dz4L13RL/wzrF5pWq2kthqNnKY
        Z7addrxuOoIr7ynUhVgpwd0z8/qU50ZunUVmj2z9nz4aWvif4N/GrxJqFhHP/ZmirFZTTIG2TZMzFPRg
        Ik5HOHx3NeFmOJlTxWHpRe8tfTb9WfQZZho1MJias43tHT11f+R4EsbP90Zr6A+aPoT9ne5+A3hewg13
        4i3ep6n4gikdl0Y2LPZpg/Iflz5pIwcMQMkgqcZPz2YrMqsnTwySj3vr/wAA+my15ZSiquJlefazsvw1
        +ZF+1b+1M37QV/p2naXpj6V4X0t2kt0uCDPPIRje4GQoAyAoJ6kk84FZVlf1BOc3eb+5EZtmv1+1OmrQ
        Wvm/8jmf2evgH4g/aH8Y2unLJcw+H9PCrfamxLLaw5LeXHnjexLYUcAkkjGa6Mwx1LL6bkl7z2Xd92c+
        XYCrmVRJt8kd32XZf1pufQcvxP03xt+1z8O/h9odqsHgLwdfNZ2VrHnZLcwxODKR32uoCk54BbPzmvn/
        AKrKjltXE1H+8qK79G1+fX/gH0bxca2Z0sLTVqdNtW80n+WyPmz4+eIrq8+PvxBvYXaykOs3lsfs7FMo
        kjR84x1C5PqSa+kwFKKwdKL10T189T5fMa83jas4uzu1p5afoechg3Q5r0zyT3z40fCg+F/2fvgz4o8k
        RzXljcW903QsJJpLm3Pv8ksnPoFFeBgcX7XG4il2aa+S5X+SPpMfhPZYHDVl2s/n7y/U8LtLprW5iniY
        CSJw6kjPIORXvSSknF9T56EnCSkt0fohpH7Otuvx08Q/GrxRqFnJ4MgH9v6eEfeZP3SyCRwRgLHyRzkk
        L26/nksxf1OGAop8791/fsvU/R1lsfr08wrNci1X3bv06Hzd8M/gx4j/AGr/AIpa34kuRLpXhq61CW81
        DVpR8sas5byYieGcKQPRQMnsD9JicbSynDxorWaSSX6vy/M+Ww2BrZxiZV5XUG22/wBF59Oy/A9T/ac+
        NngPQNa8BeFPDWm6Z4v8PeFxLFf6e+JLVkKpGsayD/loAGO9ScMRnPzCvKyzA4mrCrXqScJT2fXvf0PZ
        zTMcLRnSw9OKnGO63Xa3r+R55+0F4L+EkXw48N+OPhtcz2f9q3b282kT3BkMIVWL5VyXUqwUfeKkMCOC
        CfSy6vjXiJ4fF68qvf8A4bQ8nNMNgVhoYrB6cztb776PXT7jyL4WQPc/FLwhEgy0msWaKPczoBXsYx2w
        1R/3X+R4eB1xdL/FH80fWH/BSptupfD/AOXP7q+/nBXyvDW1X/t39T67inej/wBvfofFnzelfan5+Lj3
        NAH3nrnj/Sfhv+xj8OJdV8PQeKbe8kt4xp11M0cTMDJMGbb94AoPlPByM18BTw88VmlZQnytX1/D9T9N
        q4ung8poSqQ50+VW+V/0Pnb4u/tVeK/if4u0LWbYr4et9CkE2nWVlIWEUuR+8Yn77YAHQDGRjk5+kweU
        0MLTlTl73Nu32Pk8bndfF1YVIe4oapJ9fPv/AJX7nQaL+2f4isPFGveLL7RNP1HxZf2Mem2d8SUh0+BS
        zbEiwS2523nL8kDtXPPJKUqcaMZtQTu11b9fTTY6qfEFWNSdedNOo1ZPol6b76vUs/Af9sbVPhN4f8T2
        er21x4juL+Zr6yeWXAjunz5hcnnYx2thR13f3s1OPyaGKnCVNqKWj9Ft8ysuz6WEp1I1k5Nu69Xvfy9F
        3Po/wv4iufGf7C+t6zqbB7290fWZ5mUYDSedc8gdgSOnavm6tKNDNo04bKUPyR9TTryxWTTrT3cZ/qfn
        Cfl68V+kn5SS20b3dxFBFFvllYIi5AyScAc0m1FNsqMXOSjHdn0x4L/YT8etLb6n4h1PSPB9tCwlL3cq
        3MkbA5GUX92end6+Xr59hrOFKLnf5f8AB/A+vw3DmK5lUqzULa93f02/E+lPDPwH8L/EXxXZeK/EPxBu
        fidrGhSJEv2ee3israZCHA8m3GEIIBK7uf4ga+aqY+th6bo0qSpxl5O7T83/AF2Pq6eX0cTVjXq1XVlD
        zVk1rtHr/TO20nxT4J+Kfi7WZm0KLUG8HytbnxBf2sRgjlwTKkMjEt8oHzHAHTk8VwzpV8LTiua3tNbJ
        u9ul159D0IVaGKqyajd03bmaW/VJ+XU+NPhl+0tD8Pfjz4svPC3hZLzwv4kv0jGm2ERFxsjZgjwKB95t
        7MY8clsZGM19nicseIwVNVp2nBbvbXo/yufBYTN44fMaroU7wqNaLfTql56ux9xfEHwteax8PPFkHhOK
        DS/EOt2b7bh08lnlaMIC5AyH2gKCeRgelfD4erGFaDraxi/wufoWIpSnQqRoaSknr52sfkj4h8Pal4U1
        q80jWLKbTtSs5DFPbTrtdG/wIwQRwQQRwa/XadSFaCqU3dM/Dq1GpQqOlVVpLdGdWhiWLSxn1S9t7O0i
        ae6uJFiiiXq7sQFA+pIqZSUIuUtkdMISqSUIq7eiP0Y/Z2/Zp0P9n7w7L4x8Yz2r+Iordpp7uZh5GmRY
        yyoTxux1f8BxnP5vmOZ1Mwn7Giny30XV/wBdj9UyvKqWWU/bVmue2r6JeX+ZmeOPjwPjJ+zJ8UNY0nTZ
        VtE1BdD06JVLTXKSNbIGK/3mMzYUdsDk1rQwDwePoU6j1tzPsrXf6GVfMY43LsRUpRdr8q7u9lt8yx8P
        vglcfC79mm98IyapaaN428Yh4le7nMYFzKmFgVlBJKxqc7Qed2OKjE41YrHqvyt04W+5Pf5s0wuAeDy9
        4fmSqTv1+01t8kunZsPgL+yfpX7O2qTeN/FXie1uby1tnRZGUQWlmGGHcu5yTjKgnaMMeDnh4/Np5jFY
        elCyb9WyMuyanlcniKtS7S9El/XU2PGfw/8Agx+1f4pd08RHUvEFhZCAyaNfAOkCuxBAZWRgGlPIB+8A
        e1Y0cRj8qp/BaLfVdfz6G9fC5dm9S/MpSSto9l+XXsfMf7Tn7JGn/AzQLbXtN8T/AG2ynuFtk0+/jC3J
        YgklGXhwAOflXHqelfT5Xm88dUdKcLPe62Pks2ySngKXtqdS62s9/k1/kfNePc19MfJB+NADFkZC6qzL
        vG1gD94ZBwfxAP4UWTGm1ex9A/sIRpL+0TpLHkpZ3TL7HyiP5E187nztgn6o+o4bV8d/26/0PrD4oeK1
        0n4r3M+h/AbVPGnimzSNU8Q3FssFqw2AgxXDK4JUPt7HIYds18nhqXNh0qmJUIP7N7v5o+zxNblxL9lh
        XOpH7Vkl8pP1/M89+Peo/tC/FjwBc6AvwuXQNMuXV7prTVoLmeWNTuEeA4IGQCcDJxj1B9DAxyzCVlVd
        fma291pHn4+WaYyg6McPyp7+8np26HwZq+jahoGoTWGqWVzpt9CcS2t3C0UqH0ZWAI/Gvu4ThUjzQd15
        H55UpzpS5akWn2ehU3/7FWZkMtAC7D5eMc0Afav7DHwH8U+GvGP/AAsTxFZHw7oFtZTJCdR/dSz7xgvt
        bBVAMnc2M8YyOR8XnmPo1af1ak+aV1tt/wAOfeZBl1ejUeKrLlVmtd/+GMn9qL9oj4cz6/raeA/Dek61
        4j1EeVqHi28txOFxGIsWwfIzsGPMAA4yNxO4a5Zl2KcIvEzcYLaN7eevz6b+hnmmaYWNSX1WClN7yte2
        ltO+ny9Tn/gJ+0T8MvhH4L02G++HJ1zxlFJL52qmOElw0hKbHfLKQpVcADp710Y/LsZi6snGraGml32O
        XLc0wWDoxjKk3U11SXfvufcvj/x94ptfga/ivwh4Znu/Ek9lbXVtotzC0ksfmFNytGhBZkVmO0d1r4mh
        QovFexrztG7Ta8v8z7rEV60cK61CF52TSfn39D4D+Ll/+0H8bUtoPE/g7xPLY2shlgsrbw7PFEjkEbuI
        8k4JHJNfe4SGWYJt0qkbvq5L/M/PMbUzTHpRrUpWXRRf+Vzxzxd8PfEvw7vrWDxNod9oc11H50KXsJjM
        i5wSM+h6jqO9evQxNHEpujJO3Y8XEYSvhGlXi432MHIrpOQmoA3vAer6PoXjHSL/AMQ6Odd0SCdXu9P8
        wxmaPuAQRyOoGcHGDwTXPiIVKlKUaUuWT2Z1YWpSpVozrR5op6r+v6ex9beJf2+4vCVp/YXgH4f22hWl
        ovlxpqg8sREdR9niwBj/AH+vWvk6WQOs/aYmrdvtrf5v/I+vr8SKgvZYajy276W+S/zPXfjN8aNcX9kK
        x8ZafcjSNd1m1sgZrPjynlKmXy85I4DgHOQDwcjNeRgsHTeZvDzV4xb38tj2sfjaqyr6zB8spKP42ufB
        /guH4g6RJ/wk3hW38RQZZg2qaZDPtcg5YNIow3PUEn3r7yu8JP8Ac13H0dj86wyx0H7fDqWvVJ6/5mb4
        y8d+I/iLrI1PxNqlxq2oJGIBLcEZRASQoAAAGSTgDqTW9DD0sNDkoxsjnxOKr4ufPXldrQ52ug5BwRT0
        oA+nPgP8e/iQ3gW3+Gnw68Ow3WqLNI66wse428cjFizhhsUhicO5xjC7SQK+XzDAYT27xeKnZdu9u3X5
        L7z63K8yxrw6wODp3kr+92vd69Pv+5nU/En4YeG/gx4euPEvxW1ub4hfETVYHistLkun8mNmBG8nhiiE
        nB+Vc8KucEcmGxNbGzVHAx9nSW7tr/w7/wCHZ34rCYfL6f1nMZe1qy2V9Pl5K++y6K5wf7Gvgpr74jSe
        NdQcWnhvwlBLfXl3KMJu8twq59Ry59l9xXo53X5aH1aOsp2SXz/pHk8PYZyxDxc3aFNNt/L9Fqep/sr/
        ABGj+J37TnxB8Y3CmA3OkSPBA7DMdussCqD7hUTOOMk+teTmuGeEy+jQWtnr62f/AAT2smxUcdmVfEvS
        60Xldf5I+ONa1mbxBrV/qlywa5vbiS5lI7u7Fm/UmvtKcFShGEdkrfcfn9ao61SVWW8m3956b+zD8MNO
        +LXxastC1hXk0oWtxPcJG5RiBGQuGB4IdkP4YPWvMzXFTweGdSn8V0l/XoexkuCp47FqnV+FJt/l+bOA
        8a+G5fBvjHW9AmLNLpl7NaF2GN2xyobHvjP416GHqqvShVXVJnl4qi8NXnRf2W0L4G8USeCPGug+IY87
        tLvobsgd1RwWH4rkfjU4mj7ejOl3TOnLa/1bGU6r2T/B6H2l8WPCd1NrmuyeFYrnTYr2WLUE8Q3F0Y4E
        kmQyq6O5ZnGU2lYgNu4cYr8/w1WKjFVtbXVra2Wn9XP2l7uxB+1F8LtM+Pvgzwvr4v44Wu7dZItRsD5s
        K3AXDDkDch+Ydj8te5w/ipYSVTD22d7Pex8FxJh+WrDEpaSVn6nwX41+AHjrwZNIf7OOs2a9LrTjvBHu
        nUV+iU8XSqLezPj1Cm+tjze9S9sy0V1Z3Vu3QrLCyn9RXYmnqjWNFbo+6vhL/wAFAhonhXRtFmtdQU2F
        rHaqkmkG4UhFCj5o2U44781+b4zhqpVqynGzu772/O59zQzmFClGM5Wsra/8Oem3v7e2oQwo1h4Zi1Zm
        AOXWSzA/ByxrlpcKVKj9+XL9z/I5MRxjg8PonzPyucX43/4KK+I7K322ulaJoT45a5ma4kB9lGB+depR
        4QoJ3rVW/RWPJlxlisQ7YPDfNs8l1D9tf4w+LnZtN1m6jhPSW2s47aL8CRk17VPhzLKf2G/Vs82vxHmc
        P49WMPJK7OF8feO/iB8UdPt7Lxj4nl1W0t5fPigmbeEfGMggDtXrYXLMLhJOdCmot6Hg4niCviI8tSbm
        vOyOAfwhAmc3Up+gGK9LkPPWYye0EUp/DapnZdOB/tKKfIdEMbzbxPvDwboWlfCX9lXQPDmv3LaZd+MZ
        X1S8f7OJylugDqJIh85Uqsa5XlWcV+TZjXnjc0nUpK6p+6umu2+29z9lyHDfVcBFzVpT95/Pb8C/8T/t
        /wAPvgD4+8Q3uvwa5d+LYLTQNJvraVl3xSZDhojwjKhk/wBrCjPSuLBqOIxlKnGNlC8mvTz9bHs4qr7D
        DzqN9D42ARAqr8q9FHoK++Pw+UuaTl3I2Qjq9BID5OvzUAS4+bf/AOO0GQuBQBFQBOIyej0AOwvl4zzQ
        ABS3QZoAXyx5eO9ACf8ALKgBZFJXcB8vrQAzcPWgBYoyf4qAJYom/vUAT/Y1/v8A6UAL5S/3qACNAOqU
        AHk8ZwcUAN2r6mgzuN81fUUBcQyFfu0Gg8KTBvx81ADRcOV8oRnyvXvQA6OR16xkUAWIpI5f9bg/SgCO
        aUMPkXFAEXz+hoAQyuOrAUAIQw6vQAnnuWw/B9KAHfw7f4vSgBwt0mbdJIG/2VoAi2r6igBd0fqKADzB
        /coNRN/7vG3mgCLzB/coMg+f0oAMGgCEll6jFAC5P9ygBSpHXNACeaPSg1IdzelABubdtx8vrQAgbfJl
        kwKAEyfMzs4rYCKRVPQ5oAilU+ZnHFACyNk7Qny+tAEe7/YNBsN2L6mgCPafSgALheqYoASP7u7t61iB
        JGzBtpHy0AKOelACb29KAJFLP90ZoAmj460AAUt0FBiH2dvWgCYqF6kCgCSgCMqW7baAJKAIHQK2CeaD
        Y3dA8R33hLxVY61YN5d7YXS3MTf7SkEVxYzDLGYadF9V+PT8T0Msxry7G08Stk9V3T0a+4/WjwV4h0P4
        r+DdG8RwW9veW15AJVWVFkMT9HTkcEEEH6V+PThq4VFqt12Z+587pO9Gb5Xqmnunszyv4r+PfEfhrxja
        6Do8a6JawlLnTdPsoxLd+I5s5aCMdIIl/wCWjnBAIPTNeVia9SNRQWnZdZeXku59hlWX4XE4aWIq+83d
        Sk7qNJdJPrKT+ykdF8LvE9/q+ieJ/FGteIY7y9iMkM+j2h/0XR3jBzAD/HIM/M+cE9MCtsPOU4yqTlr2
        Wyt0POzPD0qNWjhaFJqOjUn8U7/at0T6LtufnXqUcmq61fvqvmrDeX0stvcDDGPA3MR6rnjH5V8POLlU
        ftOrZ/StCcaOHg8Na8YpSXe+n3mtL4o8UaU2l2E142tR2yhrfz/mZVJzsPdk+vatva14OMW+a2x531DL
        cSqtdR9nd622v3XZnv1i3xD1C1t76XxTo2kPdos+y00cXqSLjAh3cBR/sjp7V7yWJmruaXyv8j8znLJa
        M5U1h5ztdaz5X6+fqec/GLXPGWgGy07Uxpd6kYNxFLZJsdAx5SQYyoz/AAnpXnYupXptKVn10PqcgwmV
        4xSq0uaL2s9nbqn1fmeea7c3uq3EWqeJdQn1e6ZI2htzxEi5C4A6ADI6dcV58+eT56zuz6zCqlRi8Pl8
        FTim031btf7/AMj6R/Yq1vxFpOheOdNs7WHUNfDLc2lleT+THKQxXBYA7V24xxXvZTKpGnUja8j8z45p
        YOricLVT5aTVm0rtdetru+52nhmbXfBOseIIbK8ij1XUZDMbF5sy3erCLNw5dgAYV+UAKOWIA6V2U+aj
        KST1fT+91+R81ilRx1Kk5xfLDTmtoqd/d0W0nre/Q948NXuifEzwtomvG2tr6KVEuoXmiVmhlHXGfusr
        ZHqCK9SEoVoRqW8z47E06+XV6mHcmmrp62uv1TPkb/goF8WUuLnTvAlhOGFuRd34Vv4yPkQ/RST/AMCH
        pX1mQYR18S8RL4Yf+lP/ACX5nx3EeLWCy9YdfHW/CCf/ALc/yPivafev0g/IxsbMOoxQZ2Z+gH7BOt6h
        H8BvF8GmW6ajqtjqM81nZSyiNZXa2jMcZY/dDOpGT0ya/P8AP4R+uQcnZNK7+b/Q/TuG5z+oTUdWm7L5
        J2+88m/ai0j483HhY614+uYYvDb3KRNpejzD7PAx5QyIucjcMBnZsMR6ivVyqeWqr7PDJ89t3v8AL/gJ
        aHk5zTzV0faYmS5LrSO3z+fdvU96+DCXOnfsGynyibhfD+sSxxkbtwL3LJwOuQR+deFjeWeb76c0f0uf
        Q5f7SnkydteWTX4tH5vZHrX6QflQv40AGPc0Aejfs+fCGf44fEqz8OrdLZ2aobu9nyN626MoYID1YlgB
        6Zz0BrzcxxiwNB1bXey9T1srwP8AaGJVJuyWr9PI9x/b9ns/C+p/D/wZoyDT9O0fTnuYbWElVQO4RD7k
        eS3PXk+teFw/GVVVa9TVydr/AIv8z6LiWcaTo0KWiim7L7l+TM39sHQtS1K78FfGHRRK+m6xplpJJdxL
        n7LdKAyFj2yCoGe6EelXk1SEVUwFXdN6d11Jz2nOUqWZUfhaWvZ7p/O/4HpOu/8ABRHQx4GtZtK8P3M3
        jFodrR3aqLW2lwAzbw251zyAACQOStefT4dq+2anNcn4v+v6uenU4loqipU4NzfTon6/l+NjA+Adzf8A
        7XPw8+IHhTxtdtqWp2k8eo6Zq04y9nNKHG1cAbUBjHyjjDMMcCtswjHKK9KthlZPRrulb/M58tnLOsPW
        oYrVp3T7Xvt6W/Gx8/eAfip47/Zo8bapa6e6213bzPa3+lXqmS2ldSV+ZQRyDyGUg++CQfoa+Ew2aUoy
        ls9U1ufMYfGYvKK0qcd1o09v0+8891jU5tc1e+1K6INzeTvcSlBgb3YscD0yTXpU4KnBQjslY8mrUdWp
        KpLdtv7ynj3NWZn3L+x18f8Awlpvw2uNG8Z3tjYXnhfzLixu77aXa2dixWIn5i6uSNq8kMgAOK+FznL6
        0sQqlBNqe6Xfz/rufo2RZlRWFdLESSdPq+z7em1vQ+e/i1+0h4k8c/FjUfF2ialfeH08g6fYi1nMcsVp
        n7pZTwzH5zg8E8HgGvocHllKhhlQqxUtbv1/rQ+Xx2b1q+KlXoycVay9P83v/wAMXPAXxm+Od7BezeGv
        EXiPXFsQslwpJ1B41bIDFJA7beDzjA4zjIqMRgsti0q0Ixvt0/Kxphcfm04ydCcpKO/2nr63Z9Mfss/H
        z4r/ABW8ZPpet2Gn3Og2KP8A2hqbWbwTRyAYWMFWCby2Mrt6ZPGK+azXL8Fg6SnTk+Z7K91bv3sfV5Pm
        WOxtVxqwXLHd2ad+2+/yPWfiL8cvhXpnimXwH4zv7Frh40eaDUbXzrVdwyqyMVKq2MH5scEc815GHwOM
        nT+s0Iu3lv8ALqe1icfgqdT6riJK76Pb59PvPjf9t/4deEPBHirwxdeD7O0sbTVbF5pIrBswvh/lkUAk
        AEEjjj5a+xyLE169OpGu23Frfc+H4iwuHw86cqEUuZPbbS3+Z80yKT0FfTnyBXJIkyW4oHZnp+k/tJeP
        dB+Fd34AstWC6JPlBKVJuYYm+9DHJnhDzkYJ5IBAOK8qeWYapiFiZR978G+7R7VPNsXSwzwsZad+qXZP
        +vI8t3D1r1TyTa8EXS2fjTQJ2ICxahbuTnHSRT1rnxKvRmvJ/kdeEdsTTf8AeX5n1f8A8FK51Pi/wRF/
        EljcOfoZFA/9BNfK8Nr3Kr81+p9dxQ/eor1/Q+N5JVk6Ltr7I+GIqAE3DOM80AGRQAtABQZ2Z+jPwo/a
        48E2PwKh8U+IZ7U+MdKtk0y6tVCfbr2RFxEV4BKuACT91Tu9K/OcVlOIeLdGkvcbun0S/wCB95+p4TOc
        P9SVetL34qzXVv8A4O/bfsfFd98ePHN14n8Sa5Z+JNR0W71+5FzeDTLp4NxXPlqCpB2op2jnpX20Mvw0
        acKcoJqKsrq/r958BUzPFSqVKkJuPO7uzttt9y0/M77wh8dPj/Y+H01vSNb1zWdFglMMlzLbrqCIygEp
        KzK7LkEH5iCc5B7159bA5Y5unUioy9bfdsj06GYZv7NVacnKK02Utu+7+8+vv2RfjF8RPjLpWq6n4t0u
        wtdFh2R2N7b28kMl1JyX4LFWUDHIA5OOecfJZvg8Lg5RhQk3Lqrp2Ps8nxuLx0JVMRFKPSyav33exsax
        8aPgp8S/FF74J8QXmkajf2dybYRaxajyWlB2kRSuNu7d8vBBJ6ZrCGDx+GprEU00mr3T6edtTonjcvxN
        R4WpKLadrPv5X0ufAv7VXgrRfh98dvEmi+HoUtdKh8iSO1jYkQl4I3ZQSSerE+wIHavvcprVMRg4Tq6v
        XXvqfnmc0KeHxs4UtFpp20/p/M8k3DZjPNeueIfQfhL9ryf4UfD+28NfDzwpY6FdNGpvtavpPtVxczbf
        nkxtVRhidobcAoAxXztXJ/rVZ1sVUcl0S0SX4n1FLO/qlBUcJSUe7erb69uv4dDwzxR4s1fxrrdzrGu6
        jcarqdw26W5uXLMfQewHYDgdq92lRp0IKnSVkj56tXqYibqVZXbP0etvHnwt0f8AZg+HGpfEFNM1Czs9
        Is5LPTriNbiSW4igEREcRzuIO4EngZ5I61+cSoYuePrQw1023d7aN31Z+oxr4WngKM8TayUbJ6626I+X
        9Z/b/wDiMnja51XRPsFn4eA8q10C5tVkhjjH3dzLtfdjrhgOwGAK+mhkGG9koVLuXVp/0vwPlqnEOJ9s
        50klHomvx73+djivGn7T+veIfi9p3xH0XTbLwtr1rCkUosSzJdlSdxmBxvDKQpHoo5yAR2UMrp08M8LU
        k5Rb+70OKvm1Spio4qlHlklbvf1/r9D6KaL4Yft5aRBJLcx+CfinbRbGQYY3AA7KSPPj78EOv06/O3xe
        RTatz0n/AF8n+B9K1g8+gnfkqr7/APgr8fQ9Hh+BsH7Pv7IHxD0D7cmpX1xpd/eXd4sZjWSRoCqhQScA
        KqjrycnAzXA8a8fmVKrayvFJfM71gY4DLatJO7tJt/L/ACPzFWby+hr9LPy4hXe/3higdmdj8KLbwVee
        K4z4+v8AU7DQIkMjDSoBJLOwIxHkn5ARk7sHpjjOa4sXLEKn/syTl59PM9DBQw0qv+1yaiu3XyPqnXv2
        7/Cnw/8AB/8Awivwg8HNpdtEjRQ3uoBY0Q9PNEalmkY9dzsDnBIPSvmKeR1sRU9rjal79t/Ty+R9VUz2
        hh6fssFT22vovXu/nY+VPhV8Q5/h18UfDvi2RXujp9+lzcKDmSWPP70Ak/eZSwyT1NfUYrDrEYedBaXW
        n6HyeExEsNiYYh62ev6/M+5fGv7Efgz4+anL4+8HeNJdLtfEEhv5Atqt3Azvy5Qb0ZCWySrE4YsOOg+L
        oZ1XwMfq9enfl03s/wBT7fE5JQx0niKNS3Nrtdfp+Zc8H/8ABOTwN4dvrW+8Q6/qPiBLch5LYqlrbykD
        owG5tuecBx2GT3itxDiaicacVG/zf9fIuhw7hqUlKpJyt8k/69R3/BQa78O3vwS06xt9X0+PULHVYJbX
        T4ZkMjoI5I2VUByAofOeg2gUsgVRYtvldmnd/iPiD2csHZy1TTS79PyZ+c8aEdRX6Ifmp6xe/tJeONU+
        Elp8O5tSjXw9bgR7kjxcSQqcrC755ReMAAHAAJI4ry45bh44l4pL3n91+/qenPNcVPCrCN+6tPO3b0OV
        uvib4tvvDtvoEviTUzoUEQgj0xbp1tgmc4MYIU/UgmuqOFoRm6qguZ63tqcksbiZ01SdR8qVrX0t+pz8
        cGB5pfC+ldRxHbfC3UPAkOqT2Hj3Sr+50i7ARNS0m4KXNi3PzhDlJF55BBIxxnoeDFxxLipYWSTXRrR/
        qj0sFPCJuGLi2n1T1Xy2f3fefa3wG/Zd+EU/ifSvGfhLxld+Kk02VbmG0eeE+XKBlDKoRXUqSGAIU5Az
        6H4zH5pjvZyw9emo38n+Gp9zl+U4BVI4nD1HO3mt/PQ5b/gpVp0xHgC/Ck26/bYGb+6x8llH4gN/3ya6
        +GpK9WPXT9Ti4og3GjPorr8v8j4i3mvtz89sx+Pc0BZnsfxL+OFh43+CXgDwPa2F1b3Ph8Mbq5mZfLkb
        BVdgByeCSc4x05614uFwE6GLq4mTVpbH0GNzKnicDRwsYu8LXforaHjmPc17R88bnhPWbTw/rcN3qGiW
        niCyAKTWF4zokikYOGRgyt6MDweeawrU5VYcsJOL7o6cPVhRnzTgprs/60fmfV3ww8Hfs0/GNYbeOG+8
        H622A2mXmpuodvSORyyuPQZDf7NfJYqtm+Cu21KPdJfj2PtsHh8kx9lGPLLs2/w11Ppzxb8PNL8Gfs3e
        KPCfh6Fo9Ot9Av47ZHfeSzRSPkt3JZic+9fM0sROtjoV6r15lf70fVVsLClgZ4eirLlkl80z8nV+b73F
        frR+LCMwXqcUAep+CfBXiL9oa7e3uPiBZSa5E4WCx8T6lOJZ1I6wsyuGPByuQcDOMV5FevRy33lRfK+s
        Uvx2Pdw+Hr5quV11zJ7Sb+9bn158AfBfjD9l7w/cr488S+E9I8EmZp2QlmuWnZMYWTCDPyrwRISAQAOt
        fIZhXoZnUTw0JOp+FvTX9D7bLMPiMqpOOKqQVP8AG789P1NK4+OnwZ+Negax4AtPE03hW31Jmj86OEWA
        udzAsUdl2/OxwQ+GbJ45rNYHH4GccTKnzW+dvu7fgavMcuzCEsLGpy82na9+11bX72eCeM/iHr37HXje
        58I+GdL8M3sS28U0GtXGnZvp43XP711cchtwx0xg45xXvUMNTzmkq9aUk7vS+i9ND5vFYutkVb6vh4Qa
        stbe8/VprW9zymX9pn4l3HjRvE48W36agWyIUkxahf8Ann5P3NvsR79ea9dZXg1S9j7NW79fv3PCecY9
        1vb+0d+3T0tt+vmffcXgrwB+1Z8OfD2va9plpd31xZRyNPZTbLi1kK/PHvU5wrbhtbI46V+f+3xOVV50
        6UmrP5Pzsfpjw+FzfDwq1oJ3SfmvK6PAPiX/AME7r2wt5bvwNrx1LYuRpurBUlbrnbKoCk9OCqj3r6HD
        cRJvlxMLea/y/wCCfLYvhZpc2FqX8pf5r/L5nx9q+l3nh3VrvTtRgks9Qs5mhngkGHjkU4IPuCK+xhON
        WCnB3TPialOdGbhNWkj3fwP+0+3iPw0PAXxXe+8QeDbgxqb+1lKX1ttIKlmH+uQEAkNluM84Ar5/EZV7
        Op9ZwNozXTo/8vy9D6fC5z7Wn9VzC8oO2vVevdfj6n0tputeCvgX+zH4h1X4VarY+JorSdNQDarOJ28+
        SWFMyIoQqyqF2rhTlVzzk181KFfH4+EMbFxb00VtFfbf9T6uEsPl2XTqYFqSWurvrpvbt20PjHxf+0P4
        y8eeP9E8V65fi4udGuYrmys4V8q3hKOr4VR6lRkkkn1wAB9pRy3D0KEqNNfEmm+p8FWzbE4jEQr1X8LT
        SWi/p/M/RLx34N0H9qz4N6bHBqtxZaXqJh1GC5tcMysoIKOucHGWUg9GHqK/O6FarleKbcbyV1qfp+Io
        Us2wqjzPllZ3RW+Av7MHhr4CTX17p91darq95H5El7dhVKRZBKIqjgEhSck52j0q8fmdbH2jNWiuiMsv
        yqhl15U7uT6vt2Pjb9vHx9P4p+N0+i+YfsHh63jtYowRtMkirJI/1O5FP/XMV9jkOHVLCe06zf4LRfr9
        58RxHiJVsZ7LpBfi9X+n3HzjketfSHylmRbn9KAsxccbe/8AeoCzPof9g2Vf+GhdMU4BNldYz3/dmvnc
        /wD9yfqj6rhv/fv+3X+h6V+0X8WvjrrXxM1vwr4QsNb0/Rbec2tu+i6fIJJ1IUeYbgKSOSeVZQM+2a8v
        LsLl0KEa1eSct9Xt8v8AO56+aYrNJ4mVDDRajsmlvdLr+qtY+jP2cNF8aeAfg+X+Jes3N/qqyTXrtfXB
        uJbS32g+W8hJLEYZupxuwDgV89mNShXxP+yxtHbTS772PpctpYihhksXK8t9Xe3lfr/XQ/N79or4x3Px
        z+Jd94heL7LYootLCAjDJbqzFd3qxLFj7nHQCv0TLsGsDQVPru/U/M8zxzx+IdT7K0Xp/wAE81Az0Nem
        eSRyIT0FAHpPwF+K1v8ABn4h2niK70G08RW8aNG9vdKu+POP3kLEHZIMcHHIJHGcjzsfhHjaLpRlyv8A
        rR+R6uW41YGuqsocy/Fea8zqPj9+1b4s+OlzJZvI2h+GFbMWkWshw/o0z8eYfbAUcYGeTy4DKqOCXN8U
        +/8Al2OvMc4r45uC92Hbv69/TY2vAvh/9nPw94D0fXfF+ua/4i165ty1x4esB5axSA4ZSQq45HBMgyDn
        Hpz16ma1K0qVCKjFPST7fj+R1UKWUUqMateblJrWPn8rfK7O80P9rz4PfDWMS+Cfg6sd1EoSK6vJIknx
        nvMRK/QA9Tkj8a4Z5RjsS7Yivp8/y0R3QzrL8Kr4bD6/Jfjqyrr/APwUl8cXcw/sfwzoemwd1uvNuX/7
        6DoP/Ha0p8OUEv3k2/Sy/wAzGrxPXb/dU0vW7/yL+gf8FK/E9sgGteDtJ1Bs8mxuJbXI+jeZUVOG6Tf7
        uo16q/8AkaU+KKiX7ykm/J2/zOe/aX/aw8IftAfDiz0tPC2o6d4itLtbi3uZ3jeKFcESKHBDHcMcbccA
        9hW2W5ViMBX53NOLWu5jmmcYbMMP7NQakndXtp369j5YHzdDX1R8eWLeKW7uIoIlVpJGCKCQASTgcngf
        jSbUU2yoxc5KMd2foT8N/wBn7wV+yr8P5viF4++z6v4jtYhKuSHiglP3IYFPDSE4G89OSNoyT+fYnMMR
        mtZYbD6Rf4+b8vI/SsJl2Gyii8ViNZpb9vJf57+h8xX3wN+LPxi1S58Z2/hWfUE8QTNfpcw3EPlN5jbg
        AS/ygZxg4xjBxivp44/A4OKw7nbk02fT5HyFTLcwx03ilTvz67rrt1Pqn9pPwlL4D/Ys0zw9eSJJd6bH
        p9vI6H5TIrKG2+ozu/CvlstqqvmrqrZuT/M+vzWi6GT+xb1ior7mj5u/Zp/an1T4F3baZfRy6v4RuJN8
        tmpHmWznrJCTxz3U8H2PNfS5nlUMcueGk117+v8AmfJ5TnM8vfsqmtN/evT9V/T3v20PGHw/8e6x4V8Q
        eCbi0ur29tpm1OS2QxvwU8rzVIGH/wBYORnAHUYrDJKOJw8alLEJpJq1/ne34HTxBXwuJlSq4dptp3tv
        0tf8dz5q3D1r6Y+RHR8daAPqj4T/ALZOi/CP4Mjw/pHg/wAvxXHkC6XaLW5Yn/XTHO8sAcbcYOOGUcD5
        PF5LUxeK9rOp7j+9eS6H2WD4go4LBqjTpe+vufm+v4fM8t8G+GfGP7UnxRl+1ag1zfT/AL+/1S6/1VnA
        DgtgYAAzhUGMkgcDJHrVquHynD+6tOi6t/1uzxKFHFZ5im5PXq+iX9bL/gs+g/j54/8Ah58I/gVcfCnw
        PqkWoancskV3LauspGHVpXmkHy7227do6A4wABXzuX4fFYzGLG4iNktVf8LeSPqc0xOEwGAeAw0ryemm
        vq35s8L/AGUPiJY/Dj4vWVxq8ot9H1S3k0q8nY4ESS4KsT2AdUyewye1e9m+GlicK1DeLuvl/wAA+ayL
        FwwmNTqaRkuVvtf/AIKO/wBa/wCCf/j221OcaPqGjanpbMWtrh7lo3aP+EsuzAOPQke9cFPiHDOK9pFp
        9dP+CenV4XxSm/ZSi49Lt3+eh7f+yj+ylrPwa8S33iXxHfWj38tq1nb2di5kVVZlZndio5+QAAZGCeew
        8PNs2p42CpUk7Xvdn0GS5LUy+pKtWknJqyS2tp/kfMP7Z+hLof7RPiJoXRor1ILzYvVGaJQwPuWUt/wI
        V9RklRzwUU+l1+J8hxFS9nmEmn8ST/C36HihGRg17p80fYHwo1bRfjF8AEbXNQ1m31/wFbvp7HRQZbuW
        0kx5LJHyDkKELYyPLPrXwuOpVMHjPcS5ajvrtfrr/W5+x5Ri1jcHGTfvR0fy/wAz0D4TeIdD1Kyvvh5P
        YnQdL1F2n8PXFw8rLczqAJlR5CBkNtwqAA5fArhm6tCpHFxfM4/F6dNv18jsxmGhjKEsPLS+3qeI/Erx
        n4n+Feu31rrvhO71XToXYLfaId80Sj/nrCeeP7y8EV+gYV0sTTVSnLfuflMsE+aVKUuWa0af6PzPLNS/
        ao+H12rCaS+STvFcWI3A/ia9WGFqIyllOLeyX3nF6x+0zo9yTDoGh3uoTHhfkCKfwUE11xpOPxMw/sGv
        LWtNJGTHp/xN+Ip8yaNfC+lv1ZwUYj2H3j+la88I6LUxnRyzAa/HL7/+AbukfCjRPDH+lXRbVLxeXu74
        5VT6gHgVSlc8TFZnXrv2dP3V2W5i+JPitoemS/ZrV31S5ztWK0GVz6Z/wq0bYbIcZiF7SouSPd7mOuoe
        LNcHmC0ttEtm5BnG+Qj6VsrsKlLK8J7spOrLy0Q7+yr2P5p9ZuZm9EVVH5YqrM5XiaDdoUUl82ezfsvf
        A+b4weP4jqAf/hF9Ixd6rdOPlKLyIs+rY/LNfOZ7may7DNQf7yWkf8/kfR5DljzPFJuNqcdX/l8z6Suv
        jEnxI+LFnZyaYr+G7kLbaHFLbMhdSBgpMuWt3Yc4Iwy7dyjGa/Mlhvq9By5ve+1/w3X/ADP3BNN8qWh5
        H+134j0yHxRovw28OPIfD/gqJvP82Yys9/MMkM55YxxnHsZMdq+gyWjJwliqvxVPyX+b/I+P4kxapUVh
        49TwDI+bn7v3fevpj8zuhZFJOAOfSgLoO+O9AXQ/ev8AeoMxcfNjPPpQAu//AGKAHxkDrQA4Kp6GgBxY
        L905+lABvX1oHZiiUGIcdelAWYn2j5dmzigQ3d/sUAON0y/d2mgrlYi3MifeZR9aA5X2JPtb+ooJDzve
        gBPtD+9AB9pPl4xzQA/evrQQN8z/AGaB2G/w7u3rQUOjlw208LQA9Pl68UAPDqy5DZHrQAwzF+ibaAJf
        NH2fy9vzetABj3NAEYkDfeXFABIhPQUAL5PlruI3N6UAJsO3dj5qAEPz/wCzQAz7N/tCgBfL9qAGUGl0
        LtPpQF0RYNBmA3t0GaADyRux5gzQAYSLqd1ADSwXqcUARs7P90bqAEMTDqKdmaXQzzj/AM8zRYLoTevq
        KLMLoQzIvVgKLMLocXUd61L5WVSwXrQHKwlYbd2ePWgkhL460AOyNuc8UG1iOgLBVcrCwoRX+8cUuVhY
        WWIBtq8r7VlZgJtPpSswGRsB3osyeZFjaPaiwc0e45Zlj6LTsO6ClZiuhCof+MLRZmZLt/2xRZgT7VP3
        ziizAKLMCDL+hpATbh60ANBRxknmg0uixc/8fEn+8aFsQ9z6V/Yx/aGj+HWvt4S1658vw9qkoME8jYW0
        uDxk+itwD6HB9a+Fz7Lmn9cpLT7S/X/M/TuGczVemstrP3l8D794/rH5rsfaPiP4K+HPE9zq9+/2q01b
        VPL8zVLW4ZbmFUAAWF/+WYIyCFxnJzXwU8PTm5S6vr1+XY/T6Gb4rDRp0tHCF/da0bfddX2vsdRoXhHS
        PDOgw6LpmnwWmlxR+WtsiDaR3z6k9yeTW0KcYR5IrQ82via2JquvVk3J9Twr4r/shaZ4lkku/Ck0GjXE
        uRLZTqTbOCeSMfMp9hx7V5eJy6FW8qej/A+2yri2vg2o4u80tmviX6P8zjIP2HL6LQNPY69BLrUeftKy
        BxC3J27GUhuFPQ5Fcn9k2gve16ntT455q87UrU3ttf5p6avsN8N/so/Ebwdb3dnoXiiDTbKVHi8pbuVh
        tY5zyvDe9VTwGIpJxpzsmTi+Kcsx841MTQ5pKzvZLbpvsU7P9h/Xry9mutT1i1FxcuDNcmeaZyB0OPlB
        b1zwayjlMpNuctX6m9TjilTpqnQp+7HZWS331107dTQk/Yev4/FzPbeIIBoBVEV5oy1yi4G8Kv3OT65F
        W8p/eXUtPxMY8cJ4RQnS/eXb02fa/XQ+jvh78KvD3wz0/wCz6NZqk7qBNeSfNNMQP4m9PYcCvbo0KdBW
        gj86x+Y4nMZ89eV+y6Isat8MvCuu602saloVlf6mUWP7VcRB3VR0AJ6DPpVSo05y55RuyKWYYuhSdClV
        cYdk9DiPir8QPC/7Mvw1uJNPs7azeRpDp+mQDAlnclmbH90E5Y/h3row2GlWnHD4eOr+5d2zDE4vnU8b
        j5txgldvd9FFeb2X39D8ufE3iK+8W6/faxqVw9xfXkrTSyOcksTk1+vYPCwwVCNCnsvxfVn4bmeYVM0x
        U8VV0vsuiS2S9EZOW9K7Tyx+0+9AHpHwj+P3iz4Jwa1F4Zntov7VRFla5h83y2TdtdATgMNxHII56dK8
        3GZfQxzi61/d7HrYHM8Rl6lGjb3u/T0NvRf2wPijp/iS21S/8Ry63BGcTabexp9lnQ9VZFUAexHIrmqZ
        Ng5U3CMOV91e6Ouln2OhUU5z5l2srP7kfWb/ALXvgH4g/AzxeILiLQNbi0S5jGiXrCMmRomREhbhZAWI
        A288jKivkv7IxOHxVNNc0XJar169j7RZ1hcThKkou0lF+69Pu7/I/OOv0g/KhN7elAEuR60ASadql1pF
        7FeWF3NZXcR3R3FvIY5EPTIYYI/CplCM1yzV0XCc6clODs11RpeL/Hmv+PtSi1DxFqtzrF9FAtslxdPv
        cRrkhc/Uk/Uk1lRoUsPFwpRstzbEYmtipKdaXM0rfI9x+B37ZGs/Cfw1H4W1bRLfxT4ZjJEUM0nlywqz
        ZZQxVlZckkKR36gYA8PH5NDF1PbU5csvwf8AkfQ5dn1TB01Qqx5orbul+vker6Z+1D+zfqEgF98K7exk
        YFnkk8OWMiZ+qsWP/fNeVLLM1ivdrX/7eke3DNcnqP36FvNxj+lzrbT9vX4S+GUez0jw1rlvbKflFhp1
        tDE3HUDzlP5iuR5BjanvTkr+bf8Akdb4iwNN8sIyt5JW/NHyD+0X8TtD+L3xQvPE+haXcaTb3MMSSpcl
        fMlkUbTIQpIGVCjAJ+7nvX1+W4Wpg8OqNWV2m9j4fNsZSx2J9tRi0mle/V9/useZ49zXqHjihCemaAHZ
        FADMe5oA3vBnjbWvh94itdc0DUJdO1K2OUmiPUd1YHhlPcHg1hXoU8TTdOqrpnThsTVwlRVaLs0fa3gn
        /godo914UvB4o0eWx8R29q7wmzUva3kwX5V/vR7mwOcgf3q+Ir8PVY1F7GV4t9d0v1/rQ/QMPxNRlSft
        42ml02b8u3z+8+IPEniO/wDFuv6hrWqXDXWo3873E8rfxMxyceg7AdgAK+5pUo0YKnBWSPzytWniKkqt
        R3bdzOaVnChmLBBhQT0GScD8ST+Na2SMm29yHA/vUCK8nPSg1E3D1oAjoAv6A8Ueu6a00qwQrcxl5Wzh
        F3DLHHYDmsqqbpySWtmdGHaVaDk7K6/M+lv2+fHHhXx94z8L3/hnXrPXDDYSW9w1lKJFjxJuXJHGTub8
        q+byChWoU6kasXHVWufUcRV6FedN0ZqVk72d+x8t7T6V9SfHiUAR4/eZ7UAGPc0AO3r60AOoAKAJAwPQ
        0GR6B8IvjT4l+CniL+1fDt4EWTC3VlMC0F0g6K6+2ThhgjPB5OeDGYKjjYclVej6o9LA5hXy+pz0no91
        0Z9X+LP+Cgmla98INXXSbO60Lx1NEtvBA482JC2A8qSAY+VdxAYA5xwRmvk6XD9SGJj7RqVPq/0t5+R9
        pV4kpTwknTTjU6L9U9tPM+EiSxJJJJ5JNfdn5y3fVhLO0r75HLtgDcxyeOBQklojZtyd2yGgQmRQA3ac
        Z5xQBFIhPQUGo08R4PWgBSwHU0AJbXM1leRXNvK8E8TiSOWJirowOQwI5BB5yKTSkmmtCoycWpRdmj1m
        7/au+J+p/D/UPB+o+JH1TSb23FrI17CklwI+MjzSNxyBgliTg8Eda8lZVhI1lXjCzTvpt93+R7DzjGSo
        yoTldNW1WtvX/O546fl61654ospeToNtBsEfHWgBKACgDV07XNU0hHSx1C7skc5Zbedowx9TgjNZzpU6
        jvOKfqghWq0laEmvR2HahrepausaX2qXd4kJyqXE7SDPqMk0QpU6esIpeiCdarVVpyb9XcpR8da0MSQM
        D0NACx8R4PWgyJY6AH7m27P4aAFoAtaZqV7o94l3p11PY3UfKT20rRuv0YEEVE4RqLlmrrzNIVJ0pc1O
        TT8tDo/FfxR8W+OtMsNP8Q+IdQ1q0sSzW6XsxlKEgAnceScDGSTXPRwlDDyc6UEm+x018biMTBU603JL
        a5y/8O7t611nESZHrQAuPc0GQu0+9ADmZl6jFABQB2Phn4u+NfB+m3GnaR4l1G0064ha3ksvOLwFGBDA
        RtlRwTyAD71xVcFhq0lKpBN736/ej0aOY4vDx5adRpbW3X3M46u084Yql/vCgAx7mgDS1PxLq+tWNtaa
        jqt9f29sMQQ3Vy8iRD/ZDEhfwrKFGnTblCKTfZG9TEVqqUak20u7bM3Hua1MCWWd5mDSO0jBQoLEk4AA
        A+gAA/CkklsNty1bGkh/9mmISN2hkWSN2SRCGVlOCCOhBoaTVmNNxd1udBb+P/FFmpWDxJq8Ck5IjvpV
        BP4NXM8LQe9NfcjrWNxS2qy+9/5mJdXj3U8k0rNLNIxd5HYszMTkkk9Sa6ElFWRyNuTcpO7ZAR5n+zTE
        GPc0ALtPvQB0uj/FHxh4e0aPSdK8V6zpemRu0i2llfywxhmxk7VYDqM/XJ7muWeEw9SbnOmm+7SZ6MMZ
        iaUFTp1GkuibRFc/E7xjeb/tHizXJ94w3malM24dMHLc0LCYdbU4/chvG4p71Zf+BP8AzOcnmeaV5Zna
        SV2LM7nJYnkknua6UklZHG25O73GDnpTEB460AJuHrQB33wB+J8Pwd+LGh+K7q2mvLOzMqT28BAd0kie
        M4zgZG4HqOledmGFeMw0qMXZu1vvPUy3FrA4mNaWqV729D6T8Rf8FKr77Y/9h+C7ZLMH5X1C8ZpGHqVR
        QFPtk183T4bVv3lTXyR9RU4o1/d0tPN/8D9ThdY/4KH/ABE1jTL2wl0bwvHDdQvAzJaXBZVZSpxmcjOD
        3GPau6PD2Fi1Lmlp5r/I8+XEuLkmuWP3P/M+W3GelfTnyYIMdaAELAdTQABgehoAXHuaAIj8qbTwfSgA
        77+392gCQsF6nFABuGM54oANwxnPFACkZ+/83+7QA/IoA2b7xjr+saPZ6TqOualfaVZnNtY3N3JJBAcY
        yiMSq8HHArGNClCTnCKTe7srm88RWqRUJzbS2TbsdZ8NPjp44+FDOnhjxFc6faSMHe0YLNAx7ny3BUE9
        yAD71zYnAYbF61oXffZ/gdeFzHFYPSjOy7br8f0O2+Jn7XnjL4u/D+Twr4gtNKML3Ec7XlrC8cp2ZIBG
        8r1xyAK4cLk9DCV1Wpt6dGd+LzuvjMO6FSK1tqr9PmeKY9zXunzJJHx1oAXzB/coAbQAUGJIksscckaO
        6pIAHUHAbByMjvzSaTd2UpSSaT0ZHTJJ9p2YxzQB6L4Q/aB+IvgTT47DRPFuoWtlGAI7aRlnjjAGAFWQ
        MFHsMCvOrZbhMRLmqU1f7vyPXoZtjsNHkpVXb5P87lrVv2lvijrcLxXPjfVlRxg/Zpvs5656xhT/AJx0
        qIZXgqbuqS+ev5l1M5zCouWVV/Ky/Kx53fX1zqd3LdXlxLd3UrbpJp3Lu59Sx5Jr0oxjBcsVZHkTnKpJ
        ym7t9WUdx27scetUQd78F/ivdfBzx9aeIbeN7uwdDaanYocfabRj86j/AGl4ZfcY7mvOx+DjjaLpvfdP
        sz38mzH6hiPe+CWj/wAz6D8baHdeBItG17wjOms+FNQjWfRNRtt7SRKZQ8FsnJWIJ825lCuQCCc5r5Gl
        JVXKnWVpr4l301fnftsfrd00pRd0z0nUG0f9pnQpdOlnPhz4kaYpAWKZY5ptm0eajKSANzYx2OQRilhM
        TPKZ6+9Rl+B4mZZcsava0rKou+0l2f8AWh85eKPCHjrw3fz2upeGvDvjieA4dby3Wx1Ae7cGN/qMZr76
        jWo1oKdOTUX21R8BNUYzdKpKVKS3W6/zscTqPxN1zw/ujT4O6pZSDvaiIr+aiu6MIv7dyHl9Ktvi187n
        M6x42+LOvC0XSvhrd2H27P2aS6Qu0oBwSoJGfyrSNXDpyvNe7v5epp/YeX0uV4ivfm2S6+ltTkrr4RfE
        bxk9xP4p1Ca0tbY5uIIlL+T/ALyqAq/jXSqtK8UpL3tvP0MpZjluWqSwOHcpR3dtvVvU6mx+FNp8O7a2
        kGntHNcpujurkq0jj6fw/TAq6VanVbUJXa3Pkszx+PxVnifdi9ktv69StfdTXaj5/ZnXfCD4G+I/jZ4g
        FlpEP2fToTm91WcYgtk7knu2Oij9K8jM81w+WU+ao7ye0er/AOB5n0mUZRiM1q8tJWit30R9XeLl8MfD
        7wbD8LfDN5Zad4elsHvdQ1u8BddRYLuBDJkSI5V1ZlIKFR2r8qdavja7xte7neyS6f5W6dz96wWCo5fQ
        WHorRbvv5nF2mvL8A/h7/wAJ/f2ltb+JNdXHhXw5BOzIbhogsl3OOFZUQKd2OBx1YV1RovMK31eLbjH4
        peV9EvN/1sbVq8MLSdWbsj5RlmlmklkuLp7y6mkee4upD89xM7FpJG92Yk/kO1fbQioqyVv0XRH4xj8Z
        LG13Ue3QbvT+5VnnCZG3d/FQBGeJMnpQA/d/sGgBQwZdwOWoAj8s/wB+gCXI9aAJI5yOqYoAKAJ9yYzj
        ig05iS7+zskYQEEdqA5irl/VaDLmJjaqvVwKA5hRCjdOaCPbMFgV/vcUB7ZgbeIdQRQaCbB7UABjC9eK
        AAxhevFAEvlfWgBot0PSQUASRW5jbaQWWgBJomMmXww/2aAGxIY+o3UADRCM7x0/u0AIOelACeavqKAD
        bxnfxQARCInDZB9DQAvz+hoAY8zt0GaAHbm9KAF3J/cNACZj9DQBD5i+hoAftPpQAnkt/eoAZ9n/ANug
        BDEy/dbNADCkqruKkNWnKA8ShOq7qOUAHlN95SKzAhZgn3TQBK+w9A1bAR7k/vCgB+2P0FAEexD99QPr
        QBHJHAVyDx60F+0YySJGOA3NAe0ZHLEM4/g9aCiGVF9aAIh8x3gZH92g0uJuGM9qA5iZQH+7zXUF0S+U
        nqKB8yGfZD6muUx5h32ZN2N4zQHMPCxx/dAf6UGY4mEdVNADtkH900GoBs9EoAXA/u0AIIwenNAChgnU
        7qAFVgzYByaAHbBWIB9kX/noKAGCMKMHrQBJcyr9ok+YfeNC2Kadyn8+cY5oaTVmOLlFqUdGj7G/ZZ/b
        KHh+2tPCHjy5ZrBMRWOsyHJhHQRy9yo7N26Hjp+dZpk0sM3Xw6vDqu3p5fkfruTZ5DM4qhiny1ls3op/
        5S/B+p902l3DfW0VxbzR3EEqh0liYMjqehBHBFfLJpq6PpGnF8slZk1MQUAFABQAUAITgUAea/Gr49+G
        vgnobXOrXK3GpSKfsulxMPOmPYkfwr/tH8M1rRo1cVUVKhG8vy832CcqVCk8RiZclNde77RXV/0z8xPi
        38Xtd+MfiufW9amyT8sFsh/d28fZFHp/PrX6dlmWQy+D1vN7v9F5H5PnWdTzWahBctKPwx/V92/+AjjM
        e9e0fN2YmR60BZjd5oEOyPWgCMfN05oAKACgAoAXafSgdmQ0BZhQFmP8w+XjvQFmN2n0oNB+3/bFAC0G
        dmSZHrQFmEcZHVsUCFx7mgAx7mgAx7mgAx7mgAx7mgBCQOpoHZkf8W3v6UBZkVBoRUAFACZFACnjrQAm
        8+1AAWA6mgBmPc0AGPc0ALtFAD6ACgAhYN0OaDOzJaAsxdp9KAsxKAsyKTnpQaBQBH+dA7Cbm8vGDmgL
        BketBoRt84yvIoAik56UDswyMZzxQFmJuHrQFmMk56c0BZjdnlfdbfQaijnpQAUALg0AP8s/36DEk3Dz
        M54oAcOelABFQBLj3NBkSR8daAJaAAc9KAHxsB1NADqADHzbf4aAF2n0oAkb5epxQZD8igBV+b73FACU
        AG4+1ABkUAFADMe5oAXafegBMe5oAMe5oAMe5oAMe5oATyjt3Z+X1oAXHuaB2YY9zQFmGPc0BZiCIt0O
        aAsyOg0F2n0oAApTtuoAbHx1oAJOelAEdABQBFJz0oAjcE9BQOwfnQFg/OgLEcik9BQFmNiNAWJcj1oC
        xGvzS/N19KAsxaAsNU+Z1oCwu07MY5oCwuw+XjHNAiQDPQ0ALtPvQA8c9KAJolPpQA/cPWgCXI9aDIky
        KACgAoAXafSgzsxvln+/QKzFoCzLW4etAWYbh60CFoAKAI9p3bcfLQAhUt98bv8AdoA9c+B3xzt/h5Bc
        +FPFtm2u/DfVJRJdWZBd9PlyD58I7jIBZB1xkc5B8TMMveIarUHaotvPyf6H22SZyqCWGxL93o+3/APX
        9W+GGteF73QfEPhW/m8ZaFdTJNpOr6UISIpWBLSqoHEpACYyF5y3Ir52OIhPmpVlySW6d9fL069z9Dte
        0k7o7Xwr8ZtD+KcVv4c8f6VcS6+ly9sup6dauslsd+EEmM8AHlwSh25zzWShXy+Tq4SXu2vZvR/195w4
        zA4bMI8teOvRrdfMn1n4Gaze2hvvCGs2Pi7THBKeXMqTYzjrnaeR7V7eHz6g3yYmDhL71/mfA4zhjF0r
        ywzU49no/wDJnDajp/ifw9qOmjVvC+tWtrZWslofLt2m3BydxyOOfYj616iqYWvTn7GtFuTT1dtj56dL
        F4epD22HkoxTWivvuzA1HxPPqlvrlq3hjVAt5K7wwwWDkspiEaqzYyuCA2RnPSuiOGjTlTn7WPupXbku
        93ZdbnJPFyqxqw9hL3nolF66Ws3urbkWo/Df4jfFrTdPtLXwRfwTIUL3l6FgiXagT5NwBAbG49eaKeNy
        /Lpym66ad9Fq9XfX06Gs8vzPNacIRwzTVrt6LRW08nu9zptA/ZH8M+CoxqvxQ8VW7rEwB0bSXJLMSAEd
        /vckgcAdRzXl4riitW/d5fTtf7T/AEW35n02W8FRg1UzCd/7q/Vk3i340XGpeH7jQPBUFr4I8H2fnQxx
        2sXmyXe0LgSqF3Rk5cEfNnuRXgxw15+1xLc6j3v09O5+j0aVPD01SoxUYroizGum/A3wTper/FSK01X7
        KRN4W8LwLvvWudpUiJScJCybCwIwpUsST1hRnj6soYS6v8UulvPu/wAzWc40Yc9R6I+YPiF8QNb+J3jC
        78S+IbmObUbiMQxW9uD9n0+3ByttAD/CP4m6seemK+zwmFp4WkqdNaL72+7/AK0PyvOc2ljZ+zpv3Dmc
        Cu0+WF2CgA2UDswkjB6c0BZjfJH96gQ9odn3RQAmwUAKsRY4AyaAJRDnoKAJTAyrkrigCTyE8vHGaDPU
        Baxo+dpYeuaA1Dyov+ebUEWkPVtxwyYNAWYjSBPuqTQVyEJvJFGSBj6UByhLM/qtBqQmTb14oAVZCv8A
        t0ATxqZc55x1oAj873oAdHOR1Q0AOeVk+8CKAHSXTN0Q0ARl2U4IwfSgAkZi20DJ9KAFj460APwP7tAC
        eUPLx3oAbmH7207qAJMj1oAjSUL1XH1oAQ3GOqUAO3D/AJ4pQAu//YNAEJkC9UxQA1kI6vQOzHCBz0NA
        WYGOQdXWnZjsxJIg5wzhj6LTsHKxBFHH1YtW/NHuSPymM44o5o9wEIiHVDXMBB5PtQAzZJ/fWtbgM+xt
        70XQB9nk9TSuh2YyRf8Abp3Q+VkHktnbn5fWi5vyRG7P3md/FFw5Iko4jwnyn/aouiLEcgU9Dmi6CxYi
        z9m8vA3etXyszsxnkDy8bOaOVhqOWFW77K6CbgYjB/tUBcb88n+tBP0rn5WRqM8tvMzjijlYtSRFVPvH
        FHKzWzCRVPQ0crDlZX836VFzWwRh/wC9RcRL5Z/v1fKx2COUjrRysLMmGxuhzUiFZ9q7FTJ/vUAG0f3W
        rOzFdB5Tf3qVmFxASwzSC6Ibj/Xyf7xoWxu9yPZ+8zv4oAKAPXPg1+0740+C8iW+n3Y1LRN2X0q+JaIe
        pQ9UP049RXzOOyKjiW6lF8kvwfqv8j7XLeJq2HSo4xe0gut/eXo+vo7/ACPtD4cftxfD7xlFFDq803hb
        UWwDFejfCT/syKP/AEICvisTluLwn8SDa7rVf5/gfe4TG4LHr/Zqyv8Ayy92X46P5Nnu2j+KdG8QwCfS
        9VstShPIe1uEkH6GvLUovRM9CdKpT+OLRpb19RVGQ1544lLO6oo6liABSukNJvRI4Lxp8fvh/wCAYXfV
        /FFgkiA/6PbyCaU+21MkfjiqpxlWly0ouT8lc1nSlSjz1moR7yaj+e/yPlj4tf8ABQa5u45rDwFpps1I
        K/2pfgNJ9Uj5A+pJ/CvpsJw/iK3vYh8key1f+S/E+XxnEmAwath17afzUF+svwPj/wAQ+JdT8WarPqWs
        X8+o307FpJ7hyzMfqa+6wuDoYKHs6EbL8X6s/N8fmWKzOp7TEzvbZbJLslskZNdh5g3zTQai7h60AG4e
        tBkLQAjME+6c0AAYN0OaAFoATcPWgBPNNBqMoAbvX1oAcOelACbm9DQAtAEm4etABuG7bnmgCXI9aDIX
        8aADHuaADHuaADHuaADHuaAI5EJ6Cg1GZG3d/FQAztntQBGVI6igBKAI8cZzxQBJIQelAEePc0ADjPSg
        Ax7mgAx7mgAx7mgB+RQAtACrII+i0AP3D1oATefegB1AEVACFgOpoAbtPvQaiY9zQAzafSgBrfLHheT6
        UAR7T6UGwbV2Y70AQ0AB+XrxQBH83pQBJGQOtACZFADvI6fP16UAS7TjOOKDEQTE9ENAEsVABFQBLj3N
        BkSDnpQBLQAR8daAF2n0oAkoAKAJMj1oAFIf73FBkAYN0OaAJMigAyKAGY9zQAmR60AJlvSgB2Pc0APo
        AZj3NABj3NABj3NABj3NACbm25xz/coAXHuaDUMcZzxQAY9zQBAQy/dbNAD9p9KAG+Wf79AE340ARUAF
        AEVABQBHtPpQA3IoNRhGOpoAMe5oAQsB1NAEcfHWgAHPSgAHK7hy1AC0AJHx1oAlx7mgAx7mgyBBjrQA
        /IoAWMgdaAJImb0oAWgCUc9KDIlx7mgB+RQAUAG5vQUAA56UAFABub0FABub0FBiWgwPQ0AJ5i+ooAPM
        X1FAEWX9DQAz5/SgD0L4SfHDxb8ENQll8OXcdxpVy2680K+y1pc56kDrG5H8S/iDXm43L6GOjaorNbNb
        n0uWZ3WwHuT96Hbt6H0l4A+LPw2+Id5qs2ja5J8M/F2r2DWEuja06izlZmGWinxhsAYUblxn7tfJ4nA4
        vDJKcfaQTvdb/Nf16n6PhMww2NV6Ute3UjT4DeJPBfh/U5hpN9LdWSL/AGffaTfunnbN0i+W8RyqMWUE
        MOq56VLxtKtNJtWe6a+XXqd/K0jOm/aD+JPhr+xtJtPEcl2RAba7ury2jkZZlkHmfPKFBZQwXLEAnk1p
        HBYWpzVJRt2s+nTb9Bc0lodnafH7x7Dpt5qt/rNtBDZTrpstmmlq7vJ54jM+5c/wNnC5Xg84rkeBoNqE
        U7vW9/LYd2Yfibxf8Up9Tt9P0/xTq+saicNawx2qxw3qqzPIH8tQFYDaByMgjrWtOlhLOUoJL12BuWyN
        fx78JX13xhrOv6hejwH4angF7fX2rXaW6G8kiAdSvBcDlgGPDcjHSsqGJ5aapwXPJaJJX0THKOt3oeZ6
        18efAPwydf8AhV+kf8Jh4niRox4016Mraw5XaWiThp2wOoABwMsa9elluJxP+9y5Y/yx3+fRf1oeNjM1
        w2Cjdu7PAfEHiLWPFevXmua5qd1rOt3g2z6hdn94V/55oBxHGOyLgeua+opUKdGCpwjZLovz835s/Ncw
        zevjm1e0TK49TXQeCL+JoAblvSgBN5oNQ3mgBd6/3qDIf5v0oAd9q/2aAJJrkTvlV8sUAQxzvQBaUmRM
        F+aAIdx/vUAByvXdQAuZPU0AOCTGTIDYoAm/fe1ACiINHhuDQBDJb5/ioAjFqU6tuoAljiA60AKshj8z
        HfpQA0OD0SgBPMl9RQBKnP3vmoFzCiDz/wCMLQHMKbYwxiRmznpQHMJ9mO3fnmgOYK05Q5hu584xzRyh
        zBgf36zN+VDvNH9ygOVDvtKe1BiOkeM9ADQBHIIj0Q0AFACBpW6EUAHmg/fXFABJsP8Ay0b8qDTmGKVk
        6SCT/foDmCW2k2Bsnaeh9a2HzDPP8obgu9vSgXMEt0y9QBWJmRGQrHg8GgAlkNADAjno2aAG4H96gB3l
        yepoAQq69WxWnKacwyQuehFHKPnIfJb+8aOUOYYEY9AaOUXMNy3p+lHKHMO8+T+6Pyo5Q5iXyGk6Eiuw
        OcQQynoDQHMP+yS+9Bhcf9meLqS1Arj5pVcdNtAXKhYjrxQFyJJDJ1oOjmHeSf7xoDmF3/7Brn5Q5iaK
        IU+UOYfsX1NbhzDPJ9jQHMNKlTgDmuUZLQBa2r60GRLuX0oAdv3c7FrEDHuCPPk/3jQtjre5HQAhYDqa
        AFyKADcfagCxaaldWEgktrqa2kHR4pCpH4iuWphMPWd6lOMvVJnoUcxxuGXLRrSivKTX5M2oviZ4xgQL
        F4t1yNR2TUpgP/Qqw/s3Bf8APiH/AICv8joeb5m9Xian/gcv8yjqPjTX9XUrf69qd6p6i4vJJB+pNNZd
        gk7qhD/wFf5B/a+ZtW+s1P8AwOX+ZkNIXOWcsfc5rthCNNcsFZeR5tSpVrS5qknJ927iZHrVmVmR0BZg
        Pm6c0BZkVBoFAEvmr/doM7MTcPWgLMZsPpQFmIfl+7z9KAsx/mL60BZjDwuT09aAswoNBNw9aAGbF9aA
        HxsB1NABuHrQAbh60AG4etACjkYHMfp3oAm2n0oM7MaGY9KAsyXI9aBC49zQAmR60AGR60ARF2HWg1I6
        AD+DHegBJGB6GgCLIoAZj93jvQAfnQOwfnQFgx7mgQoUt0yaAExzjPNAABnoaAJdi+tADSwHU0ALQAUA
        TfJ6igBu4etAEWRQOzGSc9OaAsxPLP8AeoNBce5oATI9aAIzx1oANw9aDYhLAdTQBHQAKQ/3uKACgCPH
        OM80AL+JoAeGY7sD7v3aALOR5Wc0GVmMiU+lAWZJHx1oEEVAEv50GdiSM468UBYk3D1oEL2z2oAloAKA
        CgAoAl3n+7QZ2YpQL93mgLMaSF6nFAWYuPc0BZhj3NAg3/7NABj3NABj3NADN5zjvQOzH496AswPy9TQ
        IMe5oATI9aB2YuP3me1AWYY9zQaBtPl4xzQAY9zQBFQAm9vSgBaAE3t6UALQAm4etAEW4etABuHrQAbh
        60AV8e5oNQcZ6UAGPc0ARSc9KADcPWgBI2A6mgBY+OtAC0AFAD8j1oAMj1oM7AGB6GgLC49zQIMe5oAs
        RMPWgBaAJYxjrxQZ2ZJketAWYuPc0CH5FABQAsfHWgBKACgAoMQjdh2xQAUALtPpQAhZl6jFA7MN59KB
        2Ybm9BQSOkjFwhR41kQ9VYZBplRk4u8XY6rwf8SfGXw82jwv4s1fQ4V5FtBcl7f/AL9PuT9K462Dw+I/
        iwT/AD+/c97D55jcOklO689T0qH9sn4oT2xt9Vm8N+IoGG111XQ1fePQ7HQfpXlvI8He8OaL8n/nc9mH
        FVZfxKSfzt+jNb/ht7x6kIS20LwZbsBwy6PJx+Hn1l/YGFvrKX3r/I1/1rl/z5/8m/4Bha1+158X9agM
        C+KrbRYG6roumRQMB7M+8j8DW8MkwNN35L+rf/AOepxTiJfBBI8m1zWNR8VX323XtSvfEF8CSLnVrl7l
        1+gckL/wECvXp0adFctOKS8tDwMRnOMxKtKWnkRMzOcs7MfUmtkrbHiyk5O8ncdlvSgVhQ+7olAiPafe
        gdg2n3oEIdg6nFBqRbh60DsO3j+5QZWY/wA0elAWZHQFmSZHrQFmJGw9aBEiLjq9ACjnpzQBKJynVN1A
        AbjHVSKAJI5psZ4xQAjSyL1BFAEQmc9qAHYml6sE+tArgYivVsUBcYMHpJmgLjwQaAuWIoDnGOfSq5WT
        zIBAW6AmjlYcyJ4opM48ls+mKOVmHMOS1jPYw/7lHKw5h7wJIpQzNhfu+9FmVZkXk/Nt819vrRYNRTFG
        vUgV1WJuw8uPzM7uKGguR+WvqK4y+efYPKh96B80iEC3PRT+dXyy7GnMh6pbt0JNHJLsHMhfl9T+VQUL
        sX1FAA0Af+MLQAwWQX7jbf8AeoAQWiyf61wf92nZkWYBbeL+GnZhZj1v40QrkMq/d96u6K5JDAsDdFJp
        XQ+WQ1ngXoQ9ZjsyOR0PQA0BZkbyA9EoCxAVz998/wC7QPlfYeqBunNBJKLRj0agBYLBR94lq7LGTdic
        Wat05p2FzoUQMeiijlDmFjtnDbSi59KOUOYjmtpH/gC0cocxWMSjqoFHKHMDTpH0UVY7hHPjqmKAuOF8
        jdOaXMi7XIBqKxnB+Y0uZFcj7BJdwHpGT9KOZByS7FaSSM4+QnPSjmQuR9h2+OQ8DbRzIXLIfhPUUcyC
        zJPs6VdhajTbbfutn6UWDUSkTcb5jelA7ib183rXJdHSPpXQCiUN0Oad0Z2ZMIyej0roLB5Z/v1mKxnX
        A/fycn7xoOt7iZFADJBnpQAY9zQAY9zQAm4YznigCLe3pQai0AFACbh60ALQBCWZ+g20AG4etAC0AFAB
        QBJuHrQBHQAvmD+5QA2RgX2j7tABuHrQAzafSgBKACgBMigAyKADIoAljYDqaAJPNNACx8daAFoMiTI9
        aAI6AA8daAEk56UGpHQAUARUAR49zQAY9zQAY9zQaiFgOpoAXHuaDIkYhPu80AR7T5mccUAJGwHU0AS0
        ALMqr1NACUAFABQAUAM2n3oNRMe5oAMe5oAMfLnPHrQBHQAknPSgCPafSg2IpeuO9AEOW9KAHfiaAHFg
        OpoAj3DzM54oAd+JoAkioAk/gx3oAkiYetACjnpQYhFQBLj3NAEoUnoKADafSgyJP4Md6AJaAHbG9KAG
        bh60AO2n0oAkx7mgAx7mgAD7P4N1ABj3NAC7T70GQmPc0AJketABketAEWP3me1BqHln+/QBKCB9w7f9
        6gyDI9aAI88470Gonln+/QBN+NADcD+9QBH5Z/v0ALQAUALtPpQAlABQBFQBHtPpQAh460AFAEePc0Go
        Y9zQAmR60ARnjrQBFQAu0+lAEm4etABuHrQAbh60AA56UALQARoR1FADwwPQ0GQuPc0ASx0ASUASbh60
        ALQBLj3NBkGPc0APyKADIoAKAF2n0oASgxF2n0oAQ8daADc3oKAFX5vvcUGwbT6UAAUnoKDEI4j/AHqA
        LVACR8deKAFjQjqKAJhGx6ZoANgoMiURg9KAHbl3Y3DPpQLmFKB/9mgOYd5f0oDmK24etAcw2SQHomaD
        XmGeV9aA5gMbDqDWnKHMJg0cocw0wqvV6zDnJdi+tO4cwsaKO+KRmTiHd0FACR2jetAB9kb+9QAkik9B
        QA6Jf3X36AFV2k61pyi5h0dqsvVwlHKHMSfZv9qjlMuYTZFH1y1HKHMPhRG6KDRyhzCzwvH0xRyhzXK7
        SOg3BvmrH2jNfZoQzlfuvmj2jD2aHnUplXYpcn+9ij2jD2aFN3KvWQCn7Rh7NDBczno4rci5N9qnP/6q
        AuOBdvvA1pzEco4QsehzRzByieQo/jrlLuS/Zo/+eooC4qeVB02t/wAArq5iOUQ3EQ+6gNLmDlIBc7um
        4/hXMbjPn9DQAmx/71AAIyegY0ASfZJvQ1sHML9g5w5wfegXMIbGFY8GRc1PKR7ZjDaxL91ifpRyh7Zj
        JiqfdXP4Ucp0cxAOelHKHMB4GTnH0o5TJSHlnHVRRynSpaELQOv3TmsznCN3HVqALSzbOpxXVzESiKQz
        /wAW2jmOeUSREVerEfWruXykn7vG7ed3pmnzD5StK7j+KjmDlK8pj96OYOUZJKD0Ws+Y15Rv2r/ZFFw5
        Rpff/DtrM0iMMCSQ7kwzUHSiHyPL/wBU+P8AeoAT/nn7daACMgdaDETL+lADvNb+9XRzE8oglY9Go5g5
        R+41y+0Y/Zoi8+X2o9ox+zQ7zj5v3DWYFksB1NAEZ+XpzQA6OSQdRQAYf+9QBBcD9/JyfvGg3adyPj1N
        AWZD5bf3jQFmTY9zQFmGPc0BZkOf3eKAsLkUGggYGgBaAIqAG7zQAuRQBHQBLQAUAFABQAUAFAEf/LTP
        agBKADc3oKAEyKADIoAZj3NAABu6E0AGPc0ASUAS0AS0AFBnYKAswoCzCQZ6UBYMig0IqAA8daAIcigB
        mfc0AJn60ALj3NBqRyKTQBJj3NBkGPc0ANCZ/ioAftFADsigBWPmdTQAmRQAtABQAHjrQAmRQajBz0Jo
        AMe5oAh3Nu2/w0AOxxntQAmRQOxDvbGcUGoyQEyZ7UAR/iaAD8TQAknPSgBmDQBJ+JoAfERQBLkUALGp
        FAEkfHWgxCKgCTIPc0APjkNAE2RQZC0AN3mgCzvNACb1/u0ASAZ6E0AGPc0AGPc0AGPc0AJxQA3eaDOw
        /j1NAWZFQFmFAWYZFBoFABQZ2CgLMNp8yg0CgBu5qAHUAFABkUAGRQA3zTQA7IoAMigCKgAoAikOelAC
        ZFADMe5oNQx7mgCOgBspFA7EdAWE3mgLC0BYMj1oCwUCJIyBQA6gBvmN6UALEDQZEuPc0ASREUASZFAC
        0AS0AS8epoM7Bj3NAWYY9zQIMe5oAfQAeZ7UAFBlYXcfagLMJDnpQFmJkUBYKDUPLP8AeoAI3IoMrBG5
        FAWZaDA0CIfMb0oAl3tQBJEG/vUATUGRLHxQBZ+zNt35G6g59RPsY9aA1JPKq+VhqMKEdQtHKw1EIiHU
        fpUXNNSPzYvb8qaYaiySRnoK6tA1IwLc/wAJodg1IkZD/qlH/Aq5A1F8w/3RVahqNNyw6gUrF3Gvn/lq
        2f8AdosFyRmKdGpDF8xfegBw56UATRsnl/d5oAmjjh/umuu6OezHxsv92i6FZlj7QucZXP0NF0RaQyWS
        3/uUXQWkI7Wx+6Nv4UXRNpCMsMnXNF0VaRTkgiPY1hyRNueQ7an92jkiHPIb/o/900ckQ55CCeCPrGWo
        5Ij5pE800e0GGPbnuaooqT6i0fRz+VK4Crcs3cmouzTQWIynoaVw0FhSd/vbBSMxCGXq9AE+fenc00II
        Vjn/AOWm38DRcNCRoHTo4P4UibjtyjuaAuRs0tt6NQMd9teT7oC0AWvOlxuyMVsc+pZSySS38zJp2YWZ
        n7kj6oW/GtuUrlQJcSS/6lQP96jlDlQ6QSH+JfyosHMTom3qw/74FFg5ivK0fl/ebP0pWITI5YgOtFjZ
        TSKfkMf4s1yWLGlSOpNFgGrET/q2x9aeps1cfuuP74o1OdxEkeY/xCtdTTlId0n980fILDwjt944o1Cy
        IpIj/eo1FZC7gKzszbQrGFx1NFmGhIsTN0arMkSSMAmF+U0G6aK3ln+9QF0GRnFAXQu1PSgi6EBz0oBa
        khgAbBHJp3ZrdCRw4o1E2iQ2gH8VVyROXmkHlJS5Yi5pBtHmda5zYST5ulAEO5vQUAWiQvU0ALQB/9k=
</value>
  </data>
  <metadata name="sysTimer.TrayLocation" type="System.Drawing.Point, System.Drawing, Version=4.0.0.0, Culture=neutral, PublicKeyToken=b03f5f7f11d50a3a">
    <value>233, 17</value>
  </metadata>
  <metadata name="line18.TrayLocation" type="System.Drawing.Point, System.Drawing, Version=4.0.0.0, Culture=neutral, PublicKeyToken=b03f5f7f11d50a3a">
    <value>481, 146</value>
  </metadata>
  <data name="line18.DataSource" mimetype="application/x-microsoft.net.object.binary.base64">
    <value>
        AAEAAAD/////AQAAAAAAAAAMAgAAAE5TeXN0ZW0uRGF0YSwgVmVyc2lvbj00LjAuMC4wLCBDdWx0dXJl
        PW5ldXRyYWwsIFB1YmxpY0tleVRva2VuPWI3N2E1YzU2MTkzNGUwODkFAQAAABNTeXN0ZW0uRGF0YS5E
        YXRhU2V0AwAAABdEYXRhU2V0LlJlbW90aW5nVmVyc2lvbglYbWxTY2hlbWELWG1sRGlmZkdyYW0DAQEO
        U3lzdGVtLlZlcnNpb24CAAAACQMAAAAGBAAAAI4GPD94bWwgdmVyc2lvbj0iMS4wIiBlbmNvZGluZz0i
        dXRmLTE2Ij8+DQo8eHM6c2NoZW1hIGlkPSJUZWVEYXRhU2V0IiB4bWxucz0iIiB4bWxuczp4cz0iaHR0
        cDovL3d3dy53My5vcmcvMjAwMS9YTUxTY2hlbWEiIHhtbG5zOm1zZGF0YT0idXJuOnNjaGVtYXMtbWlj
        cm9zb2Z0LWNvbTp4bWwtbXNkYXRhIj4NCiAgPHhzOmVsZW1lbnQgbmFtZT0iVGVlRGF0YVNldCIgbXNk
        YXRhOklzRGF0YVNldD0idHJ1ZSIgbXNkYXRhOlVzZUN1cnJlbnRMb2NhbGU9InRydWUiPg0KICAgIDx4
        czpjb21wbGV4VHlwZT4NCiAgICAgIDx4czpjaG9pY2UgbWluT2NjdXJzPSIwIiBtYXhPY2N1cnM9InVu
        Ym91bmRlZCI+DQogICAgICAgIDx4czplbGVtZW50IG5hbWU9IlRlZURhdGFUYWJsZSI+DQogICAgICAg
        ICAgPHhzOmNvbXBsZXhUeXBlPg0KICAgICAgICAgICAgPHhzOnNlcXVlbmNlPg0KICAgICAgICAgICAg
        ICA8eHM6ZWxlbWVudCBuYW1lPSJYIiB0eXBlPSJ4czpkb3VibGUiIG1zZGF0YTp0YXJnZXROYW1lc3Bh
        Y2U9IiIgbWluT2NjdXJzPSIwIiAvPg0KICAgICAgICAgICAgICA8eHM6ZWxlbWVudCBuYW1lPSJZIiB0
        eXBlPSJ4czpkb3VibGUiIG1zZGF0YTp0YXJnZXROYW1lc3BhY2U9IiIgbWluT2NjdXJzPSIwIiAvPg0K
        ICAgICAgICAgICAgPC94czpzZXF1ZW5jZT4NCiAgICAgICAgICA8L3hzOmNvbXBsZXhUeXBlPg0KICAg
        ICAgICA8L3hzOmVsZW1lbnQ+DQogICAgICA8L3hzOmNob2ljZT4NCiAgICA8L3hzOmNvbXBsZXhUeXBl
        Pg0KICA8L3hzOmVsZW1lbnQ+DQo8L3hzOnNjaGVtYT4GBQAAAMYZPGRpZmZncjpkaWZmZ3JhbSB4bWxu
        czptc2RhdGE9InVybjpzY2hlbWFzLW1pY3Jvc29mdC1jb206eG1sLW1zZGF0YSIgeG1sbnM6ZGlmZmdy
        PSJ1cm46c2NoZW1hcy1taWNyb3NvZnQtY29tOnhtbC1kaWZmZ3JhbS12MSI+PFRlZURhdGFTZXQ+PFRl
        ZURhdGFUYWJsZSBkaWZmZ3I6aWQ9IlRlZURhdGFUYWJsZTEiIG1zZGF0YTpyb3dPcmRlcj0iMCIgZGlm
        ZmdyOmhhc0NoYW5nZXM9Imluc2VydGVkIj48WD4wPC9YPjxZPjY5NzwvWT48L1RlZURhdGFUYWJsZT48
        VGVlRGF0YVRhYmxlIGRpZmZncjppZD0iVGVlRGF0YVRhYmxlMiIgbXNkYXRhOnJvd09yZGVyPSIxIiBk
        aWZmZ3I6aGFzQ2hhbmdlcz0iaW5zZXJ0ZWQiPjxYPjE8L1g+PFk+NzUxPC9ZPjwvVGVlRGF0YVRhYmxl
        PjxUZWVEYXRhVGFibGUgZGlmZmdyOmlkPSJUZWVEYXRhVGFibGUzIiBtc2RhdGE6cm93T3JkZXI9IjIi
        IGRpZmZncjpoYXNDaGFuZ2VzPSJpbnNlcnRlZCI+PFg+MjwvWD48WT44MDM8L1k+PC9UZWVEYXRhVGFi
        bGU+PFRlZURhdGFUYWJsZSBkaWZmZ3I6aWQ9IlRlZURhdGFUYWJsZTQiIG1zZGF0YTpyb3dPcmRlcj0i
        MyIgZGlmZmdyOmhhc0NoYW5nZXM9Imluc2VydGVkIj48WD4zPC9YPjxZPjgzODwvWT48L1RlZURhdGFU
        YWJsZT48VGVlRGF0YVRhYmxlIGRpZmZncjppZD0iVGVlRGF0YVRhYmxlNSIgbXNkYXRhOnJvd09yZGVy
        PSI0IiBkaWZmZ3I6aGFzQ2hhbmdlcz0iaW5zZXJ0ZWQiPjxYPjQ8L1g+PFk+ODg3PC9ZPjwvVGVlRGF0
        YVRhYmxlPjxUZWVEYXRhVGFibGUgZGlmZmdyOmlkPSJUZWVEYXRhVGFibGU2IiBtc2RhdGE6cm93T3Jk
        ZXI9IjUiIGRpZmZncjpoYXNDaGFuZ2VzPSJpbnNlcnRlZCI+PFg+NTwvWD48WT45MjM8L1k+PC9UZWVE
        YXRhVGFibGU+PFRlZURhdGFUYWJsZSBkaWZmZ3I6aWQ9IlRlZURhdGFUYWJsZTciIG1zZGF0YTpyb3dP
        cmRlcj0iNiIgZGlmZmdyOmhhc0NoYW5nZXM9Imluc2VydGVkIj48WD42PC9YPjxZPjEwMTY8L1k+PC9U
        ZWVEYXRhVGFibGU+PFRlZURhdGFUYWJsZSBkaWZmZ3I6aWQ9IlRlZURhdGFUYWJsZTgiIG1zZGF0YTpy
        b3dPcmRlcj0iNyIgZGlmZmdyOmhhc0NoYW5nZXM9Imluc2VydGVkIj48WD43PC9YPjxZPjEwNzk8L1k+
        PC9UZWVEYXRhVGFibGU+PFRlZURhdGFUYWJsZSBkaWZmZ3I6aWQ9IlRlZURhdGFUYWJsZTkiIG1zZGF0
        YTpyb3dPcmRlcj0iOCIgZGlmZmdyOmhhc0NoYW5nZXM9Imluc2VydGVkIj48WD44PC9YPjxZPjk4Mjwv
        WT48L1RlZURhdGFUYWJsZT48VGVlRGF0YVRhYmxlIGRpZmZncjppZD0iVGVlRGF0YVRhYmxlMTAiIG1z
        ZGF0YTpyb3dPcmRlcj0iOSIgZGlmZmdyOmhhc0NoYW5nZXM9Imluc2VydGVkIj48WD45PC9YPjxZPjky
        MzwvWT48L1RlZURhdGFUYWJsZT48VGVlRGF0YVRhYmxlIGRpZmZncjppZD0iVGVlRGF0YVRhYmxlMTEi
        IG1zZGF0YTpyb3dPcmRlcj0iMTAiIGRpZmZncjpoYXNDaGFuZ2VzPSJpbnNlcnRlZCI+PFg+MTA8L1g+
        PFk+OTQ4PC9ZPjwvVGVlRGF0YVRhYmxlPjxUZWVEYXRhVGFibGUgZGlmZmdyOmlkPSJUZWVEYXRhVGFi
        bGUxMiIgbXNkYXRhOnJvd09yZGVyPSIxMSIgZGlmZmdyOmhhc0NoYW5nZXM9Imluc2VydGVkIj48WD4x
        MTwvWD48WT45MzU8L1k+PC9UZWVEYXRhVGFibGU+PFRlZURhdGFUYWJsZSBkaWZmZ3I6aWQ9IlRlZURh
        dGFUYWJsZTEzIiBtc2RhdGE6cm93T3JkZXI9IjEyIiBkaWZmZ3I6aGFzQ2hhbmdlcz0iaW5zZXJ0ZWQi
        PjxYPjEyPC9YPjxZPjk2MTwvWT48L1RlZURhdGFUYWJsZT48VGVlRGF0YVRhYmxlIGRpZmZncjppZD0i
        VGVlRGF0YVRhYmxlMTQiIG1zZGF0YTpyb3dPcmRlcj0iMTMiIGRpZmZncjpoYXNDaGFuZ2VzPSJpbnNl
        cnRlZCI+PFg+MTM8L1g+PFk+ODY0PC9ZPjwvVGVlRGF0YVRhYmxlPjxUZWVEYXRhVGFibGUgZGlmZmdy
        OmlkPSJUZWVEYXRhVGFibGUxNSIgbXNkYXRhOnJvd09yZGVyPSIxNCIgZGlmZmdyOmhhc0NoYW5nZXM9
        Imluc2VydGVkIj48WD4xNDwvWD48WT44NzU8L1k+PC9UZWVEYXRhVGFibGU+PFRlZURhdGFUYWJsZSBk
        aWZmZ3I6aWQ9IlRlZURhdGFUYWJsZTE2IiBtc2RhdGE6cm93T3JkZXI9IjE1IiBkaWZmZ3I6aGFzQ2hh
        bmdlcz0iaW5zZXJ0ZWQiPjxYPjE1PC9YPjxZPjk5NTwvWT48L1RlZURhdGFUYWJsZT48VGVlRGF0YVRh
        YmxlIGRpZmZncjppZD0iVGVlRGF0YVRhYmxlMTciIG1zZGF0YTpyb3dPcmRlcj0iMTYiIGRpZmZncjpo
        YXNDaGFuZ2VzPSJpbnNlcnRlZCI+PFg+MTY8L1g+PFk+OTE2PC9ZPjwvVGVlRGF0YVRhYmxlPjxUZWVE
        YXRhVGFibGUgZGlmZmdyOmlkPSJUZWVEYXRhVGFibGUxOCIgbXNkYXRhOnJvd09yZGVyPSIxNyIgZGlm
        ZmdyOmhhc0NoYW5nZXM9Imluc2VydGVkIj48WD4xNzwvWD48WT4xMDE5PC9ZPjwvVGVlRGF0YVRhYmxl
        PjxUZWVEYXRhVGFibGUgZGlmZmdyOmlkPSJUZWVEYXRhVGFibGUxOSIgbXNkYXRhOnJvd09yZGVyPSIx
        OCIgZGlmZmdyOmhhc0NoYW5nZXM9Imluc2VydGVkIj48WD4xODwvWD48WT4xMTI1PC9ZPjwvVGVlRGF0
        YVRhYmxlPjxUZWVEYXRhVGFibGUgZGlmZmdyOmlkPSJUZWVEYXRhVGFibGUyMCIgbXNkYXRhOnJvd09y
        ZGVyPSIxOSIgZGlmZmdyOmhhc0NoYW5nZXM9Imluc2VydGVkIj48WD4xOTwvWD48WT4xMDUwPC9ZPjwv
        VGVlRGF0YVRhYmxlPjxUZWVEYXRhVGFibGUgZGlmZmdyOmlkPSJUZWVEYXRhVGFibGUyMSIgbXNkYXRh
        OnJvd09yZGVyPSIyMCIgZGlmZmdyOmhhc0NoYW5nZXM9Imluc2VydGVkIj48WD4yMDwvWD48WT45NTE8
        L1k+PC9UZWVEYXRhVGFibGU+PFRlZURhdGFUYWJsZSBkaWZmZ3I6aWQ9IlRlZURhdGFUYWJsZTIyIiBt
        c2RhdGE6cm93T3JkZXI9IjIxIiBkaWZmZ3I6aGFzQ2hhbmdlcz0iaW5zZXJ0ZWQiPjxYPjIxPC9YPjxZ
        PjkwODwvWT48L1RlZURhdGFUYWJsZT48VGVlRGF0YVRhYmxlIGRpZmZncjppZD0iVGVlRGF0YVRhYmxl
        MjMiIG1zZGF0YTpyb3dPcmRlcj0iMjIiIGRpZmZncjpoYXNDaGFuZ2VzPSJpbnNlcnRlZCI+PFg+MjI8
        L1g+PFk+OTAxPC9ZPjwvVGVlRGF0YVRhYmxlPjxUZWVEYXRhVGFibGUgZGlmZmdyOmlkPSJUZWVEYXRh
        VGFibGUyNCIgbXNkYXRhOnJvd09yZGVyPSIyMyIgZGlmZmdyOmhhc0NoYW5nZXM9Imluc2VydGVkIj48
        WD4yMzwvWD48WT43ODc8L1k+PC9UZWVEYXRhVGFibGU+PFRlZURhdGFUYWJsZSBkaWZmZ3I6aWQ9IlRl
        ZURhdGFUYWJsZTI1IiBtc2RhdGE6cm93T3JkZXI9IjI0IiBkaWZmZ3I6aGFzQ2hhbmdlcz0iaW5zZXJ0
        ZWQiPjxYPjI0PC9YPjxZPjc1NDwvWT48L1RlZURhdGFUYWJsZT48L1RlZURhdGFTZXQ+PC9kaWZmZ3I6
        ZGlmZmdyYW0+BAMAAAAOU3lzdGVtLlZlcnNpb24EAAAABl9NYWpvcgZfTWlub3IGX0J1aWxkCV9SZXZp
        c2lvbgAAAAAICAgIAgAAAAAAAAD//////////ws=
</value>
  </data>
  <metadata name="line24.TrayLocation" type="System.Drawing.Point, System.Drawing, Version=4.0.0.0, Culture=neutral, PublicKeyToken=b03f5f7f11d50a3a">
    <value>207, 191</value>
  </metadata>
  <data name="line24.DataSource" mimetype="application/x-microsoft.net.object.binary.base64">
    <value>
        AAEAAAD/////AQAAAAAAAAAMAgAAAE5TeXN0ZW0uRGF0YSwgVmVyc2lvbj00LjAuMC4wLCBDdWx0dXJl
        PW5ldXRyYWwsIFB1YmxpY0tleVRva2VuPWI3N2E1YzU2MTkzNGUwODkFAQAAABNTeXN0ZW0uRGF0YS5E
        YXRhU2V0AwAAABdEYXRhU2V0LlJlbW90aW5nVmVyc2lvbglYbWxTY2hlbWELWG1sRGlmZkdyYW0DAQEO
        U3lzdGVtLlZlcnNpb24CAAAACQMAAAAGBAAAAI4GPD94bWwgdmVyc2lvbj0iMS4wIiBlbmNvZGluZz0i
        dXRmLTE2Ij8+DQo8eHM6c2NoZW1hIGlkPSJUZWVEYXRhU2V0IiB4bWxucz0iIiB4bWxuczp4cz0iaHR0
        cDovL3d3dy53My5vcmcvMjAwMS9YTUxTY2hlbWEiIHhtbG5zOm1zZGF0YT0idXJuOnNjaGVtYXMtbWlj
        cm9zb2Z0LWNvbTp4bWwtbXNkYXRhIj4NCiAgPHhzOmVsZW1lbnQgbmFtZT0iVGVlRGF0YVNldCIgbXNk
        YXRhOklzRGF0YVNldD0idHJ1ZSIgbXNkYXRhOlVzZUN1cnJlbnRMb2NhbGU9InRydWUiPg0KICAgIDx4
        czpjb21wbGV4VHlwZT4NCiAgICAgIDx4czpjaG9pY2UgbWluT2NjdXJzPSIwIiBtYXhPY2N1cnM9InVu
        Ym91bmRlZCI+DQogICAgICAgIDx4czplbGVtZW50IG5hbWU9IlRlZURhdGFUYWJsZSI+DQogICAgICAg
        ICAgPHhzOmNvbXBsZXhUeXBlPg0KICAgICAgICAgICAgPHhzOnNlcXVlbmNlPg0KICAgICAgICAgICAg
        ICA8eHM6ZWxlbWVudCBuYW1lPSJYIiB0eXBlPSJ4czpkb3VibGUiIG1zZGF0YTp0YXJnZXROYW1lc3Bh
        Y2U9IiIgbWluT2NjdXJzPSIwIiAvPg0KICAgICAgICAgICAgICA8eHM6ZWxlbWVudCBuYW1lPSJZIiB0
        eXBlPSJ4czpkb3VibGUiIG1zZGF0YTp0YXJnZXROYW1lc3BhY2U9IiIgbWluT2NjdXJzPSIwIiAvPg0K
        ICAgICAgICAgICAgPC94czpzZXF1ZW5jZT4NCiAgICAgICAgICA8L3hzOmNvbXBsZXhUeXBlPg0KICAg
        ICAgICA8L3hzOmVsZW1lbnQ+DQogICAgICA8L3hzOmNob2ljZT4NCiAgICA8L3hzOmNvbXBsZXhUeXBl
        Pg0KICA8L3hzOmVsZW1lbnQ+DQo8L3hzOnNjaGVtYT4GBQAAANQZPGRpZmZncjpkaWZmZ3JhbSB4bWxu
        czptc2RhdGE9InVybjpzY2hlbWFzLW1pY3Jvc29mdC1jb206eG1sLW1zZGF0YSIgeG1sbnM6ZGlmZmdy
        PSJ1cm46c2NoZW1hcy1taWNyb3NvZnQtY29tOnhtbC1kaWZmZ3JhbS12MSI+PFRlZURhdGFTZXQ+PFRl
        ZURhdGFUYWJsZSBkaWZmZ3I6aWQ9IlRlZURhdGFUYWJsZTEiIG1zZGF0YTpyb3dPcmRlcj0iMCIgZGlm
        ZmdyOmhhc0NoYW5nZXM9Imluc2VydGVkIj48WD4wPC9YPjxZPjkxMDwvWT48L1RlZURhdGFUYWJsZT48
        VGVlRGF0YVRhYmxlIGRpZmZncjppZD0iVGVlRGF0YVRhYmxlMiIgbXNkYXRhOnJvd09yZGVyPSIxIiBk
        aWZmZ3I6aGFzQ2hhbmdlcz0iaW5zZXJ0ZWQiPjxYPjE8L1g+PFk+OTYzPC9ZPjwvVGVlRGF0YVRhYmxl
        PjxUZWVEYXRhVGFibGUgZGlmZmdyOmlkPSJUZWVEYXRhVGFibGUzIiBtc2RhdGE6cm93T3JkZXI9IjIi
        IGRpZmZncjpoYXNDaGFuZ2VzPSJpbnNlcnRlZCI+PFg+MjwvWD48WT4xMDA3PC9ZPjwvVGVlRGF0YVRh
        YmxlPjxUZWVEYXRhVGFibGUgZGlmZmdyOmlkPSJUZWVEYXRhVGFibGU0IiBtc2RhdGE6cm93T3JkZXI9
        IjMiIGRpZmZncjpoYXNDaGFuZ2VzPSJpbnNlcnRlZCI+PFg+MzwvWD48WT4xMDQ2PC9ZPjwvVGVlRGF0
        YVRhYmxlPjxUZWVEYXRhVGFibGUgZGlmZmdyOmlkPSJUZWVEYXRhVGFibGU1IiBtc2RhdGE6cm93T3Jk
        ZXI9IjQiIGRpZmZncjpoYXNDaGFuZ2VzPSJpbnNlcnRlZCI+PFg+NDwvWD48WT45OTU8L1k+PC9UZWVE
        YXRhVGFibGU+PFRlZURhdGFUYWJsZSBkaWZmZ3I6aWQ9IlRlZURhdGFUYWJsZTYiIG1zZGF0YTpyb3dP
        cmRlcj0iNSIgZGlmZmdyOmhhc0NoYW5nZXM9Imluc2VydGVkIj48WD41PC9YPjxZPjEwMjg8L1k+PC9U
        ZWVEYXRhVGFibGU+PFRlZURhdGFUYWJsZSBkaWZmZ3I6aWQ9IlRlZURhdGFUYWJsZTciIG1zZGF0YTpy
        b3dPcmRlcj0iNiIgZGlmZmdyOmhhc0NoYW5nZXM9Imluc2VydGVkIj48WD42PC9YPjxZPjEwNjU8L1k+
        PC9UZWVEYXRhVGFibGU+PFRlZURhdGFUYWJsZSBkaWZmZ3I6aWQ9IlRlZURhdGFUYWJsZTgiIG1zZGF0
        YTpyb3dPcmRlcj0iNyIgZGlmZmdyOmhhc0NoYW5nZXM9Imluc2VydGVkIj48WD43PC9YPjxZPjEwNjU8
        L1k+PC9UZWVEYXRhVGFibGU+PFRlZURhdGFUYWJsZSBkaWZmZ3I6aWQ9IlRlZURhdGFUYWJsZTkiIG1z
        ZGF0YTpyb3dPcmRlcj0iOCIgZGlmZmdyOmhhc0NoYW5nZXM9Imluc2VydGVkIj48WD44PC9YPjxZPjEw
        OTk8L1k+PC9UZWVEYXRhVGFibGU+PFRlZURhdGFUYWJsZSBkaWZmZ3I6aWQ9IlRlZURhdGFUYWJsZTEw
        IiBtc2RhdGE6cm93T3JkZXI9IjkiIGRpZmZncjpoYXNDaGFuZ2VzPSJpbnNlcnRlZCI+PFg+OTwvWD48
        WT4xMTE4PC9ZPjwvVGVlRGF0YVRhYmxlPjxUZWVEYXRhVGFibGUgZGlmZmdyOmlkPSJUZWVEYXRhVGFi
        bGUxMSIgbXNkYXRhOnJvd09yZGVyPSIxMCIgZGlmZmdyOmhhc0NoYW5nZXM9Imluc2VydGVkIj48WD4x
        MDwvWD48WT4xMTAzPC9ZPjwvVGVlRGF0YVRhYmxlPjxUZWVEYXRhVGFibGUgZGlmZmdyOmlkPSJUZWVE
        YXRhVGFibGUxMiIgbXNkYXRhOnJvd09yZGVyPSIxMSIgZGlmZmdyOmhhc0NoYW5nZXM9Imluc2VydGVk
        Ij48WD4xMTwvWD48WT4xMDg2PC9ZPjwvVGVlRGF0YVRhYmxlPjxUZWVEYXRhVGFibGUgZGlmZmdyOmlk
        PSJUZWVEYXRhVGFibGUxMyIgbXNkYXRhOnJvd09yZGVyPSIxMiIgZGlmZmdyOmhhc0NoYW5nZXM9Imlu
        c2VydGVkIj48WD4xMjwvWD48WT4xMDU0PC9ZPjwvVGVlRGF0YVRhYmxlPjxUZWVEYXRhVGFibGUgZGlm
        ZmdyOmlkPSJUZWVEYXRhVGFibGUxNCIgbXNkYXRhOnJvd09yZGVyPSIxMyIgZGlmZmdyOmhhc0NoYW5n
        ZXM9Imluc2VydGVkIj48WD4xMzwvWD48WT4xMDcyPC9ZPjwvVGVlRGF0YVRhYmxlPjxUZWVEYXRhVGFi
        bGUgZGlmZmdyOmlkPSJUZWVEYXRhVGFibGUxNSIgbXNkYXRhOnJvd09yZGVyPSIxNCIgZGlmZmdyOmhh
        c0NoYW5nZXM9Imluc2VydGVkIj48WD4xNDwvWD48WT4xMDc1PC9ZPjwvVGVlRGF0YVRhYmxlPjxUZWVE
        YXRhVGFibGUgZGlmZmdyOmlkPSJUZWVEYXRhVGFibGUxNiIgbXNkYXRhOnJvd09yZGVyPSIxNSIgZGlm
        ZmdyOmhhc0NoYW5nZXM9Imluc2VydGVkIj48WD4xNTwvWD48WT4xMTA2PC9ZPjwvVGVlRGF0YVRhYmxl
        PjxUZWVEYXRhVGFibGUgZGlmZmdyOmlkPSJUZWVEYXRhVGFibGUxNyIgbXNkYXRhOnJvd09yZGVyPSIx
        NiIgZGlmZmdyOmhhc0NoYW5nZXM9Imluc2VydGVkIj48WD4xNjwvWD48WT4xMTAzPC9ZPjwvVGVlRGF0
        YVRhYmxlPjxUZWVEYXRhVGFibGUgZGlmZmdyOmlkPSJUZWVEYXRhVGFibGUxOCIgbXNkYXRhOnJvd09y
        ZGVyPSIxNyIgZGlmZmdyOmhhc0NoYW5nZXM9Imluc2VydGVkIj48WD4xNzwvWD48WT4xMDcxPC9ZPjwv
        VGVlRGF0YVRhYmxlPjxUZWVEYXRhVGFibGUgZGlmZmdyOmlkPSJUZWVEYXRhVGFibGUxOSIgbXNkYXRh
        OnJvd09yZGVyPSIxOCIgZGlmZmdyOmhhc0NoYW5nZXM9Imluc2VydGVkIj48WD4xODwvWD48WT4xMDQ4
        PC9ZPjwvVGVlRGF0YVRhYmxlPjxUZWVEYXRhVGFibGUgZGlmZmdyOmlkPSJUZWVEYXRhVGFibGUyMCIg
        bXNkYXRhOnJvd09yZGVyPSIxOSIgZGlmZmdyOmhhc0NoYW5nZXM9Imluc2VydGVkIj48WD4xOTwvWD48
        WT4xMDY0PC9ZPjwvVGVlRGF0YVRhYmxlPjxUZWVEYXRhVGFibGUgZGlmZmdyOmlkPSJUZWVEYXRhVGFi
        bGUyMSIgbXNkYXRhOnJvd09yZGVyPSIyMCIgZGlmZmdyOmhhc0NoYW5nZXM9Imluc2VydGVkIj48WD4y
        MDwvWD48WT4xMDI0PC9ZPjwvVGVlRGF0YVRhYmxlPjxUZWVEYXRhVGFibGUgZGlmZmdyOmlkPSJUZWVE
        YXRhVGFibGUyMiIgbXNkYXRhOnJvd09yZGVyPSIyMSIgZGlmZmdyOmhhc0NoYW5nZXM9Imluc2VydGVk
        Ij48WD4yMTwvWD48WT4xMDAxPC9ZPjwvVGVlRGF0YVRhYmxlPjxUZWVEYXRhVGFibGUgZGlmZmdyOmlk
        PSJUZWVEYXRhVGFibGUyMyIgbXNkYXRhOnJvd09yZGVyPSIyMiIgZGlmZmdyOmhhc0NoYW5nZXM9Imlu
        c2VydGVkIj48WD4yMjwvWD48WT45Nzk8L1k+PC9UZWVEYXRhVGFibGU+PFRlZURhdGFUYWJsZSBkaWZm
        Z3I6aWQ9IlRlZURhdGFUYWJsZTI0IiBtc2RhdGE6cm93T3JkZXI9IjIzIiBkaWZmZ3I6aGFzQ2hhbmdl
        cz0iaW5zZXJ0ZWQiPjxYPjIzPC9YPjxZPjk5NjwvWT48L1RlZURhdGFUYWJsZT48VGVlRGF0YVRhYmxl
        IGRpZmZncjppZD0iVGVlRGF0YVRhYmxlMjUiIG1zZGF0YTpyb3dPcmRlcj0iMjQiIGRpZmZncjpoYXND
        aGFuZ2VzPSJpbnNlcnRlZCI+PFg+MjQ8L1g+PFk+OTc1PC9ZPjwvVGVlRGF0YVRhYmxlPjwvVGVlRGF0
        YVNldD48L2RpZmZncjpkaWZmZ3JhbT4EAwAAAA5TeXN0ZW0uVmVyc2lvbgQAAAAGX01ham9yBl9NaW5v
        cgZfQnVpbGQJX1JldmlzaW9uAAAAAAgICAgCAAAAAAAAAP//////////Cw==
</value>
  </data>
  <metadata name="line19.TrayLocation" type="System.Drawing.Point, System.Drawing, Version=4.0.0.0, Culture=neutral, PublicKeyToken=b03f5f7f11d50a3a">
    <value>576, 146</value>
  </metadata>
  <data name="line19.DataSource" mimetype="application/x-microsoft.net.object.binary.base64">
    <value>
        AAEAAAD/////AQAAAAAAAAAMAgAAAE5TeXN0ZW0uRGF0YSwgVmVyc2lvbj00LjAuMC4wLCBDdWx0dXJl
        PW5ldXRyYWwsIFB1YmxpY0tleVRva2VuPWI3N2E1YzU2MTkzNGUwODkFAQAAABNTeXN0ZW0uRGF0YS5E
        YXRhU2V0AwAAABdEYXRhU2V0LlJlbW90aW5nVmVyc2lvbglYbWxTY2hlbWELWG1sRGlmZkdyYW0DAQEO
        U3lzdGVtLlZlcnNpb24CAAAACQMAAAAGBAAAAI4GPD94bWwgdmVyc2lvbj0iMS4wIiBlbmNvZGluZz0i
        dXRmLTE2Ij8+DQo8eHM6c2NoZW1hIGlkPSJUZWVEYXRhU2V0IiB4bWxucz0iIiB4bWxuczp4cz0iaHR0
        cDovL3d3dy53My5vcmcvMjAwMS9YTUxTY2hlbWEiIHhtbG5zOm1zZGF0YT0idXJuOnNjaGVtYXMtbWlj
        cm9zb2Z0LWNvbTp4bWwtbXNkYXRhIj4NCiAgPHhzOmVsZW1lbnQgbmFtZT0iVGVlRGF0YVNldCIgbXNk
        YXRhOklzRGF0YVNldD0idHJ1ZSIgbXNkYXRhOlVzZUN1cnJlbnRMb2NhbGU9InRydWUiPg0KICAgIDx4
        czpjb21wbGV4VHlwZT4NCiAgICAgIDx4czpjaG9pY2UgbWluT2NjdXJzPSIwIiBtYXhPY2N1cnM9InVu
        Ym91bmRlZCI+DQogICAgICAgIDx4czplbGVtZW50IG5hbWU9IlRlZURhdGFUYWJsZSI+DQogICAgICAg
        ICAgPHhzOmNvbXBsZXhUeXBlPg0KICAgICAgICAgICAgPHhzOnNlcXVlbmNlPg0KICAgICAgICAgICAg
        ICA8eHM6ZWxlbWVudCBuYW1lPSJYIiB0eXBlPSJ4czpkb3VibGUiIG1zZGF0YTp0YXJnZXROYW1lc3Bh
        Y2U9IiIgbWluT2NjdXJzPSIwIiAvPg0KICAgICAgICAgICAgICA8eHM6ZWxlbWVudCBuYW1lPSJZIiB0
        eXBlPSJ4czpkb3VibGUiIG1zZGF0YTp0YXJnZXROYW1lc3BhY2U9IiIgbWluT2NjdXJzPSIwIiAvPg0K
        ICAgICAgICAgICAgPC94czpzZXF1ZW5jZT4NCiAgICAgICAgICA8L3hzOmNvbXBsZXhUeXBlPg0KICAg
        ICAgICA8L3hzOmVsZW1lbnQ+DQogICAgICA8L3hzOmNob2ljZT4NCiAgICA8L3hzOmNvbXBsZXhUeXBl
        Pg0KICA8L3hzOmVsZW1lbnQ+DQo8L3hzOnNjaGVtYT4GBQAAALoZPGRpZmZncjpkaWZmZ3JhbSB4bWxu
        czptc2RhdGE9InVybjpzY2hlbWFzLW1pY3Jvc29mdC1jb206eG1sLW1zZGF0YSIgeG1sbnM6ZGlmZmdy
        PSJ1cm46c2NoZW1hcy1taWNyb3NvZnQtY29tOnhtbC1kaWZmZ3JhbS12MSI+PFRlZURhdGFTZXQ+PFRl
        ZURhdGFUYWJsZSBkaWZmZ3I6aWQ9IlRlZURhdGFUYWJsZTEiIG1zZGF0YTpyb3dPcmRlcj0iMCIgZGlm
        ZmdyOmhhc0NoYW5nZXM9Imluc2VydGVkIj48WD4wPC9YPjxZPjIxPC9ZPjwvVGVlRGF0YVRhYmxlPjxU
        ZWVEYXRhVGFibGUgZGlmZmdyOmlkPSJUZWVEYXRhVGFibGUyIiBtc2RhdGE6cm93T3JkZXI9IjEiIGRp
        ZmZncjpoYXNDaGFuZ2VzPSJpbnNlcnRlZCI+PFg+MTwvWD48WT41PC9ZPjwvVGVlRGF0YVRhYmxlPjxU
        ZWVEYXRhVGFibGUgZGlmZmdyOmlkPSJUZWVEYXRhVGFibGUzIiBtc2RhdGE6cm93T3JkZXI9IjIiIGRp
        ZmZncjpoYXNDaGFuZ2VzPSJpbnNlcnRlZCI+PFg+MjwvWD48WT40MTwvWT48L1RlZURhdGFUYWJsZT48
        VGVlRGF0YVRhYmxlIGRpZmZncjppZD0iVGVlRGF0YVRhYmxlNCIgbXNkYXRhOnJvd09yZGVyPSIzIiBk
        aWZmZ3I6aGFzQ2hhbmdlcz0iaW5zZXJ0ZWQiPjxYPjM8L1g+PFk+MTEzPC9ZPjwvVGVlRGF0YVRhYmxl
        PjxUZWVEYXRhVGFibGUgZGlmZmdyOmlkPSJUZWVEYXRhVGFibGU1IiBtc2RhdGE6cm93T3JkZXI9IjQi
        IGRpZmZncjpoYXNDaGFuZ2VzPSJpbnNlcnRlZCI+PFg+NDwvWD48WT4xNDwvWT48L1RlZURhdGFUYWJs
        ZT48VGVlRGF0YVRhYmxlIGRpZmZncjppZD0iVGVlRGF0YVRhYmxlNiIgbXNkYXRhOnJvd09yZGVyPSI1
        IiBkaWZmZ3I6aGFzQ2hhbmdlcz0iaW5zZXJ0ZWQiPjxYPjU8L1g+PFk+MTU8L1k+PC9UZWVEYXRhVGFi
        bGU+PFRlZURhdGFUYWJsZSBkaWZmZ3I6aWQ9IlRlZURhdGFUYWJsZTciIG1zZGF0YTpyb3dPcmRlcj0i
        NiIgZGlmZmdyOmhhc0NoYW5nZXM9Imluc2VydGVkIj48WD42PC9YPjxZPjI5PC9ZPjwvVGVlRGF0YVRh
        YmxlPjxUZWVEYXRhVGFibGUgZGlmZmdyOmlkPSJUZWVEYXRhVGFibGU4IiBtc2RhdGE6cm93T3JkZXI9
        IjciIGRpZmZncjpoYXNDaGFuZ2VzPSJpbnNlcnRlZCI+PFg+NzwvWD48WT4xNDA8L1k+PC9UZWVEYXRh
        VGFibGU+PFRlZURhdGFUYWJsZSBkaWZmZ3I6aWQ9IlRlZURhdGFUYWJsZTkiIG1zZGF0YTpyb3dPcmRl
        cj0iOCIgZGlmZmdyOmhhc0NoYW5nZXM9Imluc2VydGVkIj48WD44PC9YPjxZPjIzMDwvWT48L1RlZURh
        dGFUYWJsZT48VGVlRGF0YVRhYmxlIGRpZmZncjppZD0iVGVlRGF0YVRhYmxlMTAiIG1zZGF0YTpyb3dP
        cmRlcj0iOSIgZGlmZmdyOmhhc0NoYW5nZXM9Imluc2VydGVkIj48WD45PC9YPjxZPjE2MDwvWT48L1Rl
        ZURhdGFUYWJsZT48VGVlRGF0YVRhYmxlIGRpZmZncjppZD0iVGVlRGF0YVRhYmxlMTEiIG1zZGF0YTpy
        b3dPcmRlcj0iMTAiIGRpZmZncjpoYXNDaGFuZ2VzPSJpbnNlcnRlZCI+PFg+MTA8L1g+PFk+MjU3PC9Z
        PjwvVGVlRGF0YVRhYmxlPjxUZWVEYXRhVGFibGUgZGlmZmdyOmlkPSJUZWVEYXRhVGFibGUxMiIgbXNk
        YXRhOnJvd09yZGVyPSIxMSIgZGlmZmdyOmhhc0NoYW5nZXM9Imluc2VydGVkIj48WD4xMTwvWD48WT4z
        Njk8L1k+PC9UZWVEYXRhVGFibGU+PFRlZURhdGFUYWJsZSBkaWZmZ3I6aWQ9IlRlZURhdGFUYWJsZTEz
        IiBtc2RhdGE6cm93T3JkZXI9IjEyIiBkaWZmZ3I6aGFzQ2hhbmdlcz0iaW5zZXJ0ZWQiPjxYPjEyPC9Y
        PjxZPjMzMjwvWT48L1RlZURhdGFUYWJsZT48VGVlRGF0YVRhYmxlIGRpZmZncjppZD0iVGVlRGF0YVRh
        YmxlMTQiIG1zZGF0YTpyb3dPcmRlcj0iMTMiIGRpZmZncjpoYXNDaGFuZ2VzPSJpbnNlcnRlZCI+PFg+
        MTM8L1g+PFk+MjU0PC9ZPjwvVGVlRGF0YVRhYmxlPjxUZWVEYXRhVGFibGUgZGlmZmdyOmlkPSJUZWVE
        YXRhVGFibGUxNSIgbXNkYXRhOnJvd09yZGVyPSIxNCIgZGlmZmdyOmhhc0NoYW5nZXM9Imluc2VydGVk
        Ij48WD4xNDwvWD48WT4zMTc8L1k+PC9UZWVEYXRhVGFibGU+PFRlZURhdGFUYWJsZSBkaWZmZ3I6aWQ9
        IlRlZURhdGFUYWJsZTE2IiBtc2RhdGE6cm93T3JkZXI9IjE1IiBkaWZmZ3I6aGFzQ2hhbmdlcz0iaW5z
        ZXJ0ZWQiPjxYPjE1PC9YPjxZPjM4NDwvWT48L1RlZURhdGFUYWJsZT48VGVlRGF0YVRhYmxlIGRpZmZn
        cjppZD0iVGVlRGF0YVRhYmxlMTciIG1zZGF0YTpyb3dPcmRlcj0iMTYiIGRpZmZncjpoYXNDaGFuZ2Vz
        PSJpbnNlcnRlZCI+PFg+MTY8L1g+PFk+MzI2PC9ZPjwvVGVlRGF0YVRhYmxlPjxUZWVEYXRhVGFibGUg
        ZGlmZmdyOmlkPSJUZWVEYXRhVGFibGUxOCIgbXNkYXRhOnJvd09yZGVyPSIxNyIgZGlmZmdyOmhhc0No
        YW5nZXM9Imluc2VydGVkIj48WD4xNzwvWD48WT4zMjI8L1k+PC9UZWVEYXRhVGFibGU+PFRlZURhdGFU
        YWJsZSBkaWZmZ3I6aWQ9IlRlZURhdGFUYWJsZTE5IiBtc2RhdGE6cm93T3JkZXI9IjE4IiBkaWZmZ3I6
        aGFzQ2hhbmdlcz0iaW5zZXJ0ZWQiPjxYPjE4PC9YPjxZPjQ0MDwvWT48L1RlZURhdGFUYWJsZT48VGVl
        RGF0YVRhYmxlIGRpZmZncjppZD0iVGVlRGF0YVRhYmxlMjAiIG1zZGF0YTpyb3dPcmRlcj0iMTkiIGRp
        ZmZncjpoYXNDaGFuZ2VzPSJpbnNlcnRlZCI+PFg+MTk8L1g+PFk+MzE1PC9ZPjwvVGVlRGF0YVRhYmxl
        PjxUZWVEYXRhVGFibGUgZGlmZmdyOmlkPSJUZWVEYXRhVGFibGUyMSIgbXNkYXRhOnJvd09yZGVyPSIy
        MCIgZGlmZmdyOmhhc0NoYW5nZXM9Imluc2VydGVkIj48WD4yMDwvWD48WT4yOTg8L1k+PC9UZWVEYXRh
        VGFibGU+PFRlZURhdGFUYWJsZSBkaWZmZ3I6aWQ9IlRlZURhdGFUYWJsZTIyIiBtc2RhdGE6cm93T3Jk
        ZXI9IjIxIiBkaWZmZ3I6aGFzQ2hhbmdlcz0iaW5zZXJ0ZWQiPjxYPjIxPC9YPjxZPjM0MjwvWT48L1Rl
        ZURhdGFUYWJsZT48VGVlRGF0YVRhYmxlIGRpZmZncjppZD0iVGVlRGF0YVRhYmxlMjMiIG1zZGF0YTpy
        b3dPcmRlcj0iMjIiIGRpZmZncjpoYXNDaGFuZ2VzPSJpbnNlcnRlZCI+PFg+MjI8L1g+PFk+Mjc5PC9Z
        PjwvVGVlRGF0YVRhYmxlPjxUZWVEYXRhVGFibGUgZGlmZmdyOmlkPSJUZWVEYXRhVGFibGUyNCIgbXNk
        YXRhOnJvd09yZGVyPSIyMyIgZGlmZmdyOmhhc0NoYW5nZXM9Imluc2VydGVkIj48WD4yMzwvWD48WT4y
        MjY8L1k+PC9UZWVEYXRhVGFibGU+PFRlZURhdGFUYWJsZSBkaWZmZ3I6aWQ9IlRlZURhdGFUYWJsZTI1
        IiBtc2RhdGE6cm93T3JkZXI9IjI0IiBkaWZmZ3I6aGFzQ2hhbmdlcz0iaW5zZXJ0ZWQiPjxYPjI0PC9Y
        PjxZPjEwNzwvWT48L1RlZURhdGFUYWJsZT48L1RlZURhdGFTZXQ+PC9kaWZmZ3I6ZGlmZmdyYW0+BAMA
        AAAOU3lzdGVtLlZlcnNpb24EAAAABl9NYWpvcgZfTWlub3IGX0J1aWxkCV9SZXZpc2lvbgAAAAAICAgI
        AgAAAAAAAAD//////////ws=
</value>
  </data>
  <metadata name="line7.TrayLocation" type="System.Drawing.Point, System.Drawing, Version=4.0.0.0, Culture=neutral, PublicKeyToken=b03f5f7f11d50a3a">
    <value>358, 275</value>
  </metadata>
  <data name="line7.DataSource" mimetype="application/x-microsoft.net.object.binary.base64">
    <value>
        AAEAAAD/////AQAAAAAAAAAMAgAAAE5TeXN0ZW0uRGF0YSwgVmVyc2lvbj00LjAuMC4wLCBDdWx0dXJl
        PW5ldXRyYWwsIFB1YmxpY0tleVRva2VuPWI3N2E1YzU2MTkzNGUwODkFAQAAABNTeXN0ZW0uRGF0YS5E
        YXRhU2V0AwAAABdEYXRhU2V0LlJlbW90aW5nVmVyc2lvbglYbWxTY2hlbWELWG1sRGlmZkdyYW0DAQEO
        U3lzdGVtLlZlcnNpb24CAAAACQMAAAAGBAAAAI4GPD94bWwgdmVyc2lvbj0iMS4wIiBlbmNvZGluZz0i
        dXRmLTE2Ij8+DQo8eHM6c2NoZW1hIGlkPSJUZWVEYXRhU2V0IiB4bWxucz0iIiB4bWxuczp4cz0iaHR0
        cDovL3d3dy53My5vcmcvMjAwMS9YTUxTY2hlbWEiIHhtbG5zOm1zZGF0YT0idXJuOnNjaGVtYXMtbWlj
        cm9zb2Z0LWNvbTp4bWwtbXNkYXRhIj4NCiAgPHhzOmVsZW1lbnQgbmFtZT0iVGVlRGF0YVNldCIgbXNk
        YXRhOklzRGF0YVNldD0idHJ1ZSIgbXNkYXRhOlVzZUN1cnJlbnRMb2NhbGU9InRydWUiPg0KICAgIDx4
        czpjb21wbGV4VHlwZT4NCiAgICAgIDx4czpjaG9pY2UgbWluT2NjdXJzPSIwIiBtYXhPY2N1cnM9InVu
        Ym91bmRlZCI+DQogICAgICAgIDx4czplbGVtZW50IG5hbWU9IlRlZURhdGFUYWJsZSI+DQogICAgICAg
        ICAgPHhzOmNvbXBsZXhUeXBlPg0KICAgICAgICAgICAgPHhzOnNlcXVlbmNlPg0KICAgICAgICAgICAg
        ICA8eHM6ZWxlbWVudCBuYW1lPSJYIiB0eXBlPSJ4czpkb3VibGUiIG1zZGF0YTp0YXJnZXROYW1lc3Bh
        Y2U9IiIgbWluT2NjdXJzPSIwIiAvPg0KICAgICAgICAgICAgICA8eHM6ZWxlbWVudCBuYW1lPSJZIiB0
        eXBlPSJ4czpkb3VibGUiIG1zZGF0YTp0YXJnZXROYW1lc3BhY2U9IiIgbWluT2NjdXJzPSIwIiAvPg0K
        ICAgICAgICAgICAgPC94czpzZXF1ZW5jZT4NCiAgICAgICAgICA8L3hzOmNvbXBsZXhUeXBlPg0KICAg
        ICAgICA8L3hzOmVsZW1lbnQ+DQogICAgICA8L3hzOmNob2ljZT4NCiAgICA8L3hzOmNvbXBsZXhUeXBl
        Pg0KICA8L3hzOmVsZW1lbnQ+DQo8L3hzOnNjaGVtYT4GBQAAAK4ZPGRpZmZncjpkaWZmZ3JhbSB4bWxu
        czptc2RhdGE9InVybjpzY2hlbWFzLW1pY3Jvc29mdC1jb206eG1sLW1zZGF0YSIgeG1sbnM6ZGlmZmdy
        PSJ1cm46c2NoZW1hcy1taWNyb3NvZnQtY29tOnhtbC1kaWZmZ3JhbS12MSI+PFRlZURhdGFTZXQ+PFRl
        ZURhdGFUYWJsZSBkaWZmZ3I6aWQ9IlRlZURhdGFUYWJsZTEiIG1zZGF0YTpyb3dPcmRlcj0iMCIgZGlm
        ZmdyOmhhc0NoYW5nZXM9Imluc2VydGVkIj48WD4wPC9YPjxZPjE8L1k+PC9UZWVEYXRhVGFibGU+PFRl
        ZURhdGFUYWJsZSBkaWZmZ3I6aWQ9IlRlZURhdGFUYWJsZTIiIG1zZGF0YTpyb3dPcmRlcj0iMSIgZGlm
        ZmdyOmhhc0NoYW5nZXM9Imluc2VydGVkIj48WD4xPC9YPjxZPjIyPC9ZPjwvVGVlRGF0YVRhYmxlPjxU
        ZWVEYXRhVGFibGUgZGlmZmdyOmlkPSJUZWVEYXRhVGFibGUzIiBtc2RhdGE6cm93T3JkZXI9IjIiIGRp
        ZmZncjpoYXNDaGFuZ2VzPSJpbnNlcnRlZCI+PFg+MjwvWD48WT4yNTwvWT48L1RlZURhdGFUYWJsZT48
        VGVlRGF0YVRhYmxlIGRpZmZncjppZD0iVGVlRGF0YVRhYmxlNCIgbXNkYXRhOnJvd09yZGVyPSIzIiBk
        aWZmZ3I6aGFzQ2hhbmdlcz0iaW5zZXJ0ZWQiPjxYPjM8L1g+PFk+MzwvWT48L1RlZURhdGFUYWJsZT48
        VGVlRGF0YVRhYmxlIGRpZmZncjppZD0iVGVlRGF0YVRhYmxlNSIgbXNkYXRhOnJvd09yZGVyPSI0IiBk
        aWZmZ3I6aGFzQ2hhbmdlcz0iaW5zZXJ0ZWQiPjxYPjQ8L1g+PFk+OTwvWT48L1RlZURhdGFUYWJsZT48
        VGVlRGF0YVRhYmxlIGRpZmZncjppZD0iVGVlRGF0YVRhYmxlNiIgbXNkYXRhOnJvd09yZGVyPSI1IiBk
        aWZmZ3I6aGFzQ2hhbmdlcz0iaW5zZXJ0ZWQiPjxYPjU8L1g+PFk+MzU8L1k+PC9UZWVEYXRhVGFibGU+
        PFRlZURhdGFUYWJsZSBkaWZmZ3I6aWQ9IlRlZURhdGFUYWJsZTciIG1zZGF0YTpyb3dPcmRlcj0iNiIg
        ZGlmZmdyOmhhc0NoYW5nZXM9Imluc2VydGVkIj48WD42PC9YPjxZPjMzPC9ZPjwvVGVlRGF0YVRhYmxl
        PjxUZWVEYXRhVGFibGUgZGlmZmdyOmlkPSJUZWVEYXRhVGFibGU4IiBtc2RhdGE6cm93T3JkZXI9Ijci
        IGRpZmZncjpoYXNDaGFuZ2VzPSJpbnNlcnRlZCI+PFg+NzwvWD48WT44NjwvWT48L1RlZURhdGFUYWJs
        ZT48VGVlRGF0YVRhYmxlIGRpZmZncjppZD0iVGVlRGF0YVRhYmxlOSIgbXNkYXRhOnJvd09yZGVyPSI4
        IiBkaWZmZ3I6aGFzQ2hhbmdlcz0iaW5zZXJ0ZWQiPjxYPjg8L1g+PFk+NTE8L1k+PC9UZWVEYXRhVGFi
        bGU+PFRlZURhdGFUYWJsZSBkaWZmZ3I6aWQ9IlRlZURhdGFUYWJsZTEwIiBtc2RhdGE6cm93T3JkZXI9
        IjkiIGRpZmZncjpoYXNDaGFuZ2VzPSJpbnNlcnRlZCI+PFg+OTwvWD48WT40NTwvWT48L1RlZURhdGFU
        YWJsZT48VGVlRGF0YVRhYmxlIGRpZmZncjppZD0iVGVlRGF0YVRhYmxlMTEiIG1zZGF0YTpyb3dPcmRl
        cj0iMTAiIGRpZmZncjpoYXNDaGFuZ2VzPSJpbnNlcnRlZCI+PFg+MTA8L1g+PFk+NDc8L1k+PC9UZWVE
        YXRhVGFibGU+PFRlZURhdGFUYWJsZSBkaWZmZ3I6aWQ9IlRlZURhdGFUYWJsZTEyIiBtc2RhdGE6cm93
        T3JkZXI9IjExIiBkaWZmZ3I6aGFzQ2hhbmdlcz0iaW5zZXJ0ZWQiPjxYPjExPC9YPjxZPjY8L1k+PC9U
        ZWVEYXRhVGFibGU+PFRlZURhdGFUYWJsZSBkaWZmZ3I6aWQ9IlRlZURhdGFUYWJsZTEzIiBtc2RhdGE6
        cm93T3JkZXI9IjEyIiBkaWZmZ3I6aGFzQ2hhbmdlcz0iaW5zZXJ0ZWQiPjxYPjEyPC9YPjxZPjM2PC9Z
        PjwvVGVlRGF0YVRhYmxlPjxUZWVEYXRhVGFibGUgZGlmZmdyOmlkPSJUZWVEYXRhVGFibGUxNCIgbXNk
        YXRhOnJvd09yZGVyPSIxMyIgZGlmZmdyOmhhc0NoYW5nZXM9Imluc2VydGVkIj48WD4xMzwvWD48WT42
        NjwvWT48L1RlZURhdGFUYWJsZT48VGVlRGF0YVRhYmxlIGRpZmZncjppZD0iVGVlRGF0YVRhYmxlMTUi
        IG1zZGF0YTpyb3dPcmRlcj0iMTQiIGRpZmZncjpoYXNDaGFuZ2VzPSJpbnNlcnRlZCI+PFg+MTQ8L1g+
        PFk+ODM8L1k+PC9UZWVEYXRhVGFibGU+PFRlZURhdGFUYWJsZSBkaWZmZ3I6aWQ9IlRlZURhdGFUYWJs
        ZTE2IiBtc2RhdGE6cm93T3JkZXI9IjE1IiBkaWZmZ3I6aGFzQ2hhbmdlcz0iaW5zZXJ0ZWQiPjxYPjE1
        PC9YPjxZPjEyMDwvWT48L1RlZURhdGFUYWJsZT48VGVlRGF0YVRhYmxlIGRpZmZncjppZD0iVGVlRGF0
        YVRhYmxlMTciIG1zZGF0YTpyb3dPcmRlcj0iMTYiIGRpZmZncjpoYXNDaGFuZ2VzPSJpbnNlcnRlZCI+
        PFg+MTY8L1g+PFk+MTI5PC9ZPjwvVGVlRGF0YVRhYmxlPjxUZWVEYXRhVGFibGUgZGlmZmdyOmlkPSJU
        ZWVEYXRhVGFibGUxOCIgbXNkYXRhOnJvd09yZGVyPSIxNyIgZGlmZmdyOmhhc0NoYW5nZXM9Imluc2Vy
        dGVkIj48WD4xNzwvWD48WT4xNTI8L1k+PC9UZWVEYXRhVGFibGU+PFRlZURhdGFUYWJsZSBkaWZmZ3I6
        aWQ9IlRlZURhdGFUYWJsZTE5IiBtc2RhdGE6cm93T3JkZXI9IjE4IiBkaWZmZ3I6aGFzQ2hhbmdlcz0i
        aW5zZXJ0ZWQiPjxYPjE4PC9YPjxZPjE0NjwvWT48L1RlZURhdGFUYWJsZT48VGVlRGF0YVRhYmxlIGRp
        ZmZncjppZD0iVGVlRGF0YVRhYmxlMjAiIG1zZGF0YTpyb3dPcmRlcj0iMTkiIGRpZmZncjpoYXNDaGFu
        Z2VzPSJpbnNlcnRlZCI+PFg+MTk8L1g+PFk+MTY2PC9ZPjwvVGVlRGF0YVRhYmxlPjxUZWVEYXRhVGFi
        bGUgZGlmZmdyOmlkPSJUZWVEYXRhVGFibGUyMSIgbXNkYXRhOnJvd09yZGVyPSIyMCIgZGlmZmdyOmhh
        c0NoYW5nZXM9Imluc2VydGVkIj48WD4yMDwvWD48WT4xNjY8L1k+PC9UZWVEYXRhVGFibGU+PFRlZURh
        dGFUYWJsZSBkaWZmZ3I6aWQ9IlRlZURhdGFUYWJsZTIyIiBtc2RhdGE6cm93T3JkZXI9IjIxIiBkaWZm
        Z3I6aGFzQ2hhbmdlcz0iaW5zZXJ0ZWQiPjxYPjIxPC9YPjxZPjE3MjwvWT48L1RlZURhdGFUYWJsZT48
        VGVlRGF0YVRhYmxlIGRpZmZncjppZD0iVGVlRGF0YVRhYmxlMjMiIG1zZGF0YTpyb3dPcmRlcj0iMjIi
        IGRpZmZncjpoYXNDaGFuZ2VzPSJpbnNlcnRlZCI+PFg+MjI8L1g+PFk+MTY0PC9ZPjwvVGVlRGF0YVRh
        YmxlPjxUZWVEYXRhVGFibGUgZGlmZmdyOmlkPSJUZWVEYXRhVGFibGUyNCIgbXNkYXRhOnJvd09yZGVy
        PSIyMyIgZGlmZmdyOmhhc0NoYW5nZXM9Imluc2VydGVkIj48WD4yMzwvWD48WT4xNTY8L1k+PC9UZWVE
        YXRhVGFibGU+PFRlZURhdGFUYWJsZSBkaWZmZ3I6aWQ9IlRlZURhdGFUYWJsZTI1IiBtc2RhdGE6cm93
        T3JkZXI9IjI0IiBkaWZmZ3I6aGFzQ2hhbmdlcz0iaW5zZXJ0ZWQiPjxYPjI0PC9YPjxZPjEwNDwvWT48
        L1RlZURhdGFUYWJsZT48L1RlZURhdGFTZXQ+PC9kaWZmZ3I6ZGlmZmdyYW0+BAMAAAAOU3lzdGVtLlZl
        cnNpb24EAAAABl9NYWpvcgZfTWlub3IGX0J1aWxkCV9SZXZpc2lvbgAAAAAICAgIAgAAAAAAAAD/////
        /////ws=
</value>
  </data>
  <metadata name="line21.TrayLocation" type="System.Drawing.Point, System.Drawing, Version=4.0.0.0, Culture=neutral, PublicKeyToken=b03f5f7f11d50a3a">
    <value>766, 146</value>
  </metadata>
  <data name="line21.DataSource" mimetype="application/x-microsoft.net.object.binary.base64">
    <value>
        AAEAAAD/////AQAAAAAAAAAMAgAAAE5TeXN0ZW0uRGF0YSwgVmVyc2lvbj00LjAuMC4wLCBDdWx0dXJl
        PW5ldXRyYWwsIFB1YmxpY0tleVRva2VuPWI3N2E1YzU2MTkzNGUwODkFAQAAABNTeXN0ZW0uRGF0YS5E
        YXRhU2V0AwAAABdEYXRhU2V0LlJlbW90aW5nVmVyc2lvbglYbWxTY2hlbWELWG1sRGlmZkdyYW0DAQEO
        U3lzdGVtLlZlcnNpb24CAAAACQMAAAAGBAAAAI4GPD94bWwgdmVyc2lvbj0iMS4wIiBlbmNvZGluZz0i
        dXRmLTE2Ij8+DQo8eHM6c2NoZW1hIGlkPSJUZWVEYXRhU2V0IiB4bWxucz0iIiB4bWxuczp4cz0iaHR0
        cDovL3d3dy53My5vcmcvMjAwMS9YTUxTY2hlbWEiIHhtbG5zOm1zZGF0YT0idXJuOnNjaGVtYXMtbWlj
        cm9zb2Z0LWNvbTp4bWwtbXNkYXRhIj4NCiAgPHhzOmVsZW1lbnQgbmFtZT0iVGVlRGF0YVNldCIgbXNk
        YXRhOklzRGF0YVNldD0idHJ1ZSIgbXNkYXRhOlVzZUN1cnJlbnRMb2NhbGU9InRydWUiPg0KICAgIDx4
        czpjb21wbGV4VHlwZT4NCiAgICAgIDx4czpjaG9pY2UgbWluT2NjdXJzPSIwIiBtYXhPY2N1cnM9InVu
        Ym91bmRlZCI+DQogICAgICAgIDx4czplbGVtZW50IG5hbWU9IlRlZURhdGFUYWJsZSI+DQogICAgICAg
        ICAgPHhzOmNvbXBsZXhUeXBlPg0KICAgICAgICAgICAgPHhzOnNlcXVlbmNlPg0KICAgICAgICAgICAg
        ICA8eHM6ZWxlbWVudCBuYW1lPSJYIiB0eXBlPSJ4czpkb3VibGUiIG1zZGF0YTp0YXJnZXROYW1lc3Bh
        Y2U9IiIgbWluT2NjdXJzPSIwIiAvPg0KICAgICAgICAgICAgICA8eHM6ZWxlbWVudCBuYW1lPSJZIiB0
        eXBlPSJ4czpkb3VibGUiIG1zZGF0YTp0YXJnZXROYW1lc3BhY2U9IiIgbWluT2NjdXJzPSIwIiAvPg0K
        ICAgICAgICAgICAgPC94czpzZXF1ZW5jZT4NCiAgICAgICAgICA8L3hzOmNvbXBsZXhUeXBlPg0KICAg
        ICAgICA8L3hzOmVsZW1lbnQ+DQogICAgICA8L3hzOmNob2ljZT4NCiAgICA8L3hzOmNvbXBsZXhUeXBl
        Pg0KICA8L3hzOmVsZW1lbnQ+DQo8L3hzOnNjaGVtYT4GBQAAAMYZPGRpZmZncjpkaWZmZ3JhbSB4bWxu
        czptc2RhdGE9InVybjpzY2hlbWFzLW1pY3Jvc29mdC1jb206eG1sLW1zZGF0YSIgeG1sbnM6ZGlmZmdy
        PSJ1cm46c2NoZW1hcy1taWNyb3NvZnQtY29tOnhtbC1kaWZmZ3JhbS12MSI+PFRlZURhdGFTZXQ+PFRl
        ZURhdGFUYWJsZSBkaWZmZ3I6aWQ9IlRlZURhdGFUYWJsZTEiIG1zZGF0YTpyb3dPcmRlcj0iMCIgZGlm
        ZmdyOmhhc0NoYW5nZXM9Imluc2VydGVkIj48WD4wPC9YPjxZPjc5ODwvWT48L1RlZURhdGFUYWJsZT48
        VGVlRGF0YVRhYmxlIGRpZmZncjppZD0iVGVlRGF0YVRhYmxlMiIgbXNkYXRhOnJvd09yZGVyPSIxIiBk
        aWZmZ3I6aGFzQ2hhbmdlcz0iaW5zZXJ0ZWQiPjxYPjE8L1g+PFk+ODcwPC9ZPjwvVGVlRGF0YVRhYmxl
        PjxUZWVEYXRhVGFibGUgZGlmZmdyOmlkPSJUZWVEYXRhVGFibGUzIiBtc2RhdGE6cm93T3JkZXI9IjIi
        IGRpZmZncjpoYXNDaGFuZ2VzPSJpbnNlcnRlZCI+PFg+MjwvWD48WT45MTA8L1k+PC9UZWVEYXRhVGFi
        bGU+PFRlZURhdGFUYWJsZSBkaWZmZ3I6aWQ9IlRlZURhdGFUYWJsZTQiIG1zZGF0YTpyb3dPcmRlcj0i
        MyIgZGlmZmdyOmhhc0NoYW5nZXM9Imluc2VydGVkIj48WD4zPC9YPjxZPjk0MDwvWT48L1RlZURhdGFU
        YWJsZT48VGVlRGF0YVRhYmxlIGRpZmZncjppZD0iVGVlRGF0YVRhYmxlNSIgbXNkYXRhOnJvd09yZGVy
        PSI0IiBkaWZmZ3I6aGFzQ2hhbmdlcz0iaW5zZXJ0ZWQiPjxYPjQ8L1g+PFk+MTAxODwvWT48L1RlZURh
        dGFUYWJsZT48VGVlRGF0YVRhYmxlIGRpZmZncjppZD0iVGVlRGF0YVRhYmxlNiIgbXNkYXRhOnJvd09y
        ZGVyPSI1IiBkaWZmZ3I6aGFzQ2hhbmdlcz0iaW5zZXJ0ZWQiPjxYPjU8L1g+PFk+OTk4PC9ZPjwvVGVl
        RGF0YVRhYmxlPjxUZWVEYXRhVGFibGUgZGlmZmdyOmlkPSJUZWVEYXRhVGFibGU3IiBtc2RhdGE6cm93
        T3JkZXI9IjYiIGRpZmZncjpoYXNDaGFuZ2VzPSJpbnNlcnRlZCI+PFg+NjwvWD48WT45NjU8L1k+PC9U
        ZWVEYXRhVGFibGU+PFRlZURhdGFUYWJsZSBkaWZmZ3I6aWQ9IlRlZURhdGFUYWJsZTgiIG1zZGF0YTpy
        b3dPcmRlcj0iNyIgZGlmZmdyOmhhc0NoYW5nZXM9Imluc2VydGVkIj48WD43PC9YPjxZPjk5NTwvWT48
        L1RlZURhdGFUYWJsZT48VGVlRGF0YVRhYmxlIGRpZmZncjppZD0iVGVlRGF0YVRhYmxlOSIgbXNkYXRh
        OnJvd09yZGVyPSI4IiBkaWZmZ3I6aGFzQ2hhbmdlcz0iaW5zZXJ0ZWQiPjxYPjg8L1g+PFk+OTg3PC9Z
        PjwvVGVlRGF0YVRhYmxlPjxUZWVEYXRhVGFibGUgZGlmZmdyOmlkPSJUZWVEYXRhVGFibGUxMCIgbXNk
        YXRhOnJvd09yZGVyPSI5IiBkaWZmZ3I6aGFzQ2hhbmdlcz0iaW5zZXJ0ZWQiPjxYPjk8L1g+PFk+MTA2
        MjwvWT48L1RlZURhdGFUYWJsZT48VGVlRGF0YVRhYmxlIGRpZmZncjppZD0iVGVlRGF0YVRhYmxlMTEi
        IG1zZGF0YTpyb3dPcmRlcj0iMTAiIGRpZmZncjpoYXNDaGFuZ2VzPSJpbnNlcnRlZCI+PFg+MTA8L1g+
        PFk+MTExOTwvWT48L1RlZURhdGFUYWJsZT48VGVlRGF0YVRhYmxlIGRpZmZncjppZD0iVGVlRGF0YVRh
        YmxlMTIiIG1zZGF0YTpyb3dPcmRlcj0iMTEiIGRpZmZncjpoYXNDaGFuZ2VzPSJpbnNlcnRlZCI+PFg+
        MTE8L1g+PFk+MTA2MDwvWT48L1RlZURhdGFUYWJsZT48VGVlRGF0YVRhYmxlIGRpZmZncjppZD0iVGVl
        RGF0YVRhYmxlMTMiIG1zZGF0YTpyb3dPcmRlcj0iMTIiIGRpZmZncjpoYXNDaGFuZ2VzPSJpbnNlcnRl
        ZCI+PFg+MTI8L1g+PFk+MTA0MTwvWT48L1RlZURhdGFUYWJsZT48VGVlRGF0YVRhYmxlIGRpZmZncjpp
        ZD0iVGVlRGF0YVRhYmxlMTQiIG1zZGF0YTpyb3dPcmRlcj0iMTMiIGRpZmZncjpoYXNDaGFuZ2VzPSJp
        bnNlcnRlZCI+PFg+MTM8L1g+PFk+OTUxPC9ZPjwvVGVlRGF0YVRhYmxlPjxUZWVEYXRhVGFibGUgZGlm
        ZmdyOmlkPSJUZWVEYXRhVGFibGUxNSIgbXNkYXRhOnJvd09yZGVyPSIxNCIgZGlmZmdyOmhhc0NoYW5n
        ZXM9Imluc2VydGVkIj48WD4xNDwvWD48WT45MzY8L1k+PC9UZWVEYXRhVGFibGU+PFRlZURhdGFUYWJs
        ZSBkaWZmZ3I6aWQ9IlRlZURhdGFUYWJsZTE2IiBtc2RhdGE6cm93T3JkZXI9IjE1IiBkaWZmZ3I6aGFz
        Q2hhbmdlcz0iaW5zZXJ0ZWQiPjxYPjE1PC9YPjxZPjg1MzwvWT48L1RlZURhdGFUYWJsZT48VGVlRGF0
        YVRhYmxlIGRpZmZncjppZD0iVGVlRGF0YVRhYmxlMTciIG1zZGF0YTpyb3dPcmRlcj0iMTYiIGRpZmZn
        cjpoYXNDaGFuZ2VzPSJpbnNlcnRlZCI+PFg+MTY8L1g+PFk+NzUxPC9ZPjwvVGVlRGF0YVRhYmxlPjxU
        ZWVEYXRhVGFibGUgZGlmZmdyOmlkPSJUZWVEYXRhVGFibGUxOCIgbXNkYXRhOnJvd09yZGVyPSIxNyIg
        ZGlmZmdyOmhhc0NoYW5nZXM9Imluc2VydGVkIj48WD4xNzwvWD48WT43NzM8L1k+PC9UZWVEYXRhVGFi
        bGU+PFRlZURhdGFUYWJsZSBkaWZmZ3I6aWQ9IlRlZURhdGFUYWJsZTE5IiBtc2RhdGE6cm93T3JkZXI9
        IjE4IiBkaWZmZ3I6aGFzQ2hhbmdlcz0iaW5zZXJ0ZWQiPjxYPjE4PC9YPjxZPjg5NjwvWT48L1RlZURh
        dGFUYWJsZT48VGVlRGF0YVRhYmxlIGRpZmZncjppZD0iVGVlRGF0YVRhYmxlMjAiIG1zZGF0YTpyb3dP
        cmRlcj0iMTkiIGRpZmZncjpoYXNDaGFuZ2VzPSJpbnNlcnRlZCI+PFg+MTk8L1g+PFk+NzczPC9ZPjwv
        VGVlRGF0YVRhYmxlPjxUZWVEYXRhVGFibGUgZGlmZmdyOmlkPSJUZWVEYXRhVGFibGUyMSIgbXNkYXRh
        OnJvd09yZGVyPSIyMCIgZGlmZmdyOmhhc0NoYW5nZXM9Imluc2VydGVkIj48WD4yMDwvWD48WT44NDU8
        L1k+PC9UZWVEYXRhVGFibGU+PFRlZURhdGFUYWJsZSBkaWZmZ3I6aWQ9IlRlZURhdGFUYWJsZTIyIiBt
        c2RhdGE6cm93T3JkZXI9IjIxIiBkaWZmZ3I6aGFzQ2hhbmdlcz0iaW5zZXJ0ZWQiPjxYPjIxPC9YPjxZ
        Pjc4NjwvWT48L1RlZURhdGFUYWJsZT48VGVlRGF0YVRhYmxlIGRpZmZncjppZD0iVGVlRGF0YVRhYmxl
        MjMiIG1zZGF0YTpyb3dPcmRlcj0iMjIiIGRpZmZncjpoYXNDaGFuZ2VzPSJpbnNlcnRlZCI+PFg+MjI8
        L1g+PFk+ODUxPC9ZPjwvVGVlRGF0YVRhYmxlPjxUZWVEYXRhVGFibGUgZGlmZmdyOmlkPSJUZWVEYXRh
        VGFibGUyNCIgbXNkYXRhOnJvd09yZGVyPSIyMyIgZGlmZmdyOmhhc0NoYW5nZXM9Imluc2VydGVkIj48
        WD4yMzwvWD48WT43Mzk8L1k+PC9UZWVEYXRhVGFibGU+PFRlZURhdGFUYWJsZSBkaWZmZ3I6aWQ9IlRl
        ZURhdGFUYWJsZTI1IiBtc2RhdGE6cm93T3JkZXI9IjI0IiBkaWZmZ3I6aGFzQ2hhbmdlcz0iaW5zZXJ0
        ZWQiPjxYPjI0PC9YPjxZPjYyNzwvWT48L1RlZURhdGFUYWJsZT48L1RlZURhdGFTZXQ+PC9kaWZmZ3I6
        ZGlmZmdyYW0+BAMAAAAOU3lzdGVtLlZlcnNpb24EAAAABl9NYWpvcgZfTWlub3IGX0J1aWxkCV9SZXZp
        c2lvbgAAAAAICAgIAgAAAAAAAAD//////////ws=
</value>
  </data>
  <metadata name="line25.TrayLocation" type="System.Drawing.Point, System.Drawing, Version=4.0.0.0, Culture=neutral, PublicKeyToken=b03f5f7f11d50a3a">
    <value>302, 191</value>
  </metadata>
  <data name="line25.DataSource" mimetype="application/x-microsoft.net.object.binary.base64">
    <value>
        AAEAAAD/////AQAAAAAAAAAMAgAAAE5TeXN0ZW0uRGF0YSwgVmVyc2lvbj00LjAuMC4wLCBDdWx0dXJl
        PW5ldXRyYWwsIFB1YmxpY0tleVRva2VuPWI3N2E1YzU2MTkzNGUwODkFAQAAABNTeXN0ZW0uRGF0YS5E
        YXRhU2V0AwAAABdEYXRhU2V0LlJlbW90aW5nVmVyc2lvbglYbWxTY2hlbWELWG1sRGlmZkdyYW0DAQEO
        U3lzdGVtLlZlcnNpb24CAAAACQMAAAAGBAAAAI4GPD94bWwgdmVyc2lvbj0iMS4wIiBlbmNvZGluZz0i
        dXRmLTE2Ij8+DQo8eHM6c2NoZW1hIGlkPSJUZWVEYXRhU2V0IiB4bWxucz0iIiB4bWxuczp4cz0iaHR0
        cDovL3d3dy53My5vcmcvMjAwMS9YTUxTY2hlbWEiIHhtbG5zOm1zZGF0YT0idXJuOnNjaGVtYXMtbWlj
        cm9zb2Z0LWNvbTp4bWwtbXNkYXRhIj4NCiAgPHhzOmVsZW1lbnQgbmFtZT0iVGVlRGF0YVNldCIgbXNk
        YXRhOklzRGF0YVNldD0idHJ1ZSIgbXNkYXRhOlVzZUN1cnJlbnRMb2NhbGU9InRydWUiPg0KICAgIDx4
        czpjb21wbGV4VHlwZT4NCiAgICAgIDx4czpjaG9pY2UgbWluT2NjdXJzPSIwIiBtYXhPY2N1cnM9InVu
        Ym91bmRlZCI+DQogICAgICAgIDx4czplbGVtZW50IG5hbWU9IlRlZURhdGFUYWJsZSI+DQogICAgICAg
        ICAgPHhzOmNvbXBsZXhUeXBlPg0KICAgICAgICAgICAgPHhzOnNlcXVlbmNlPg0KICAgICAgICAgICAg
        ICA8eHM6ZWxlbWVudCBuYW1lPSJYIiB0eXBlPSJ4czpkb3VibGUiIG1zZGF0YTp0YXJnZXROYW1lc3Bh
        Y2U9IiIgbWluT2NjdXJzPSIwIiAvPg0KICAgICAgICAgICAgICA8eHM6ZWxlbWVudCBuYW1lPSJZIiB0
        eXBlPSJ4czpkb3VibGUiIG1zZGF0YTp0YXJnZXROYW1lc3BhY2U9IiIgbWluT2NjdXJzPSIwIiAvPg0K
        ICAgICAgICAgICAgPC94czpzZXF1ZW5jZT4NCiAgICAgICAgICA8L3hzOmNvbXBsZXhUeXBlPg0KICAg
        ICAgICA8L3hzOmVsZW1lbnQ+DQogICAgICA8L3hzOmNob2ljZT4NCiAgICA8L3hzOmNvbXBsZXhUeXBl
        Pg0KICA8L3hzOmVsZW1lbnQ+DQo8L3hzOnNjaGVtYT4GBQAAAMEZPGRpZmZncjpkaWZmZ3JhbSB4bWxu
        czptc2RhdGE9InVybjpzY2hlbWFzLW1pY3Jvc29mdC1jb206eG1sLW1zZGF0YSIgeG1sbnM6ZGlmZmdy
        PSJ1cm46c2NoZW1hcy1taWNyb3NvZnQtY29tOnhtbC1kaWZmZ3JhbS12MSI+PFRlZURhdGFTZXQ+PFRl
        ZURhdGFUYWJsZSBkaWZmZ3I6aWQ9IlRlZURhdGFUYWJsZTEiIG1zZGF0YTpyb3dPcmRlcj0iMCIgZGlm
        ZmdyOmhhc0NoYW5nZXM9Imluc2VydGVkIj48WD4wPC9YPjxZPjY3MTwvWT48L1RlZURhdGFUYWJsZT48
        VGVlRGF0YVRhYmxlIGRpZmZncjppZD0iVGVlRGF0YVRhYmxlMiIgbXNkYXRhOnJvd09yZGVyPSIxIiBk
        aWZmZ3I6aGFzQ2hhbmdlcz0iaW5zZXJ0ZWQiPjxYPjE8L1g+PFk+Njk4PC9ZPjwvVGVlRGF0YVRhYmxl
        PjxUZWVEYXRhVGFibGUgZGlmZmdyOmlkPSJUZWVEYXRhVGFibGUzIiBtc2RhdGE6cm93T3JkZXI9IjIi
        IGRpZmZncjpoYXNDaGFuZ2VzPSJpbnNlcnRlZCI+PFg+MjwvWD48WT42NjY8L1k+PC9UZWVEYXRhVGFi
        bGU+PFRlZURhdGFUYWJsZSBkaWZmZ3I6aWQ9IlRlZURhdGFUYWJsZTQiIG1zZGF0YTpyb3dPcmRlcj0i
        MyIgZGlmZmdyOmhhc0NoYW5nZXM9Imluc2VydGVkIj48WD4zPC9YPjxZPjYyNjwvWT48L1RlZURhdGFU
        YWJsZT48VGVlRGF0YVRhYmxlIGRpZmZncjppZD0iVGVlRGF0YVRhYmxlNSIgbXNkYXRhOnJvd09yZGVy
        PSI0IiBkaWZmZ3I6aGFzQ2hhbmdlcz0iaW5zZXJ0ZWQiPjxYPjQ8L1g+PFk+NjIyPC9ZPjwvVGVlRGF0
        YVRhYmxlPjxUZWVEYXRhVGFibGUgZGlmZmdyOmlkPSJUZWVEYXRhVGFibGU2IiBtc2RhdGE6cm93T3Jk
        ZXI9IjUiIGRpZmZncjpoYXNDaGFuZ2VzPSJpbnNlcnRlZCI+PFg+NTwvWD48WT41OTI8L1k+PC9UZWVE
        YXRhVGFibGU+PFRlZURhdGFUYWJsZSBkaWZmZ3I6aWQ9IlRlZURhdGFUYWJsZTciIG1zZGF0YTpyb3dP
        cmRlcj0iNiIgZGlmZmdyOmhhc0NoYW5nZXM9Imluc2VydGVkIj48WD42PC9YPjxZPjUzNjwvWT48L1Rl
        ZURhdGFUYWJsZT48VGVlRGF0YVRhYmxlIGRpZmZncjppZD0iVGVlRGF0YVRhYmxlOCIgbXNkYXRhOnJv
        d09yZGVyPSI3IiBkaWZmZ3I6aGFzQ2hhbmdlcz0iaW5zZXJ0ZWQiPjxYPjc8L1g+PFk+NTcwPC9ZPjwv
        VGVlRGF0YVRhYmxlPjxUZWVEYXRhVGFibGUgZGlmZmdyOmlkPSJUZWVEYXRhVGFibGU5IiBtc2RhdGE6
        cm93T3JkZXI9IjgiIGRpZmZncjpoYXNDaGFuZ2VzPSJpbnNlcnRlZCI+PFg+ODwvWD48WT41NzQ8L1k+
        PC9UZWVEYXRhVGFibGU+PFRlZURhdGFUYWJsZSBkaWZmZ3I6aWQ9IlRlZURhdGFUYWJsZTEwIiBtc2Rh
        dGE6cm93T3JkZXI9IjkiIGRpZmZncjpoYXNDaGFuZ2VzPSJpbnNlcnRlZCI+PFg+OTwvWD48WT41NzA8
        L1k+PC9UZWVEYXRhVGFibGU+PFRlZURhdGFUYWJsZSBkaWZmZ3I6aWQ9IlRlZURhdGFUYWJsZTExIiBt
        c2RhdGE6cm93T3JkZXI9IjEwIiBkaWZmZ3I6aGFzQ2hhbmdlcz0iaW5zZXJ0ZWQiPjxYPjEwPC9YPjxZ
        PjUxMDwvWT48L1RlZURhdGFUYWJsZT48VGVlRGF0YVRhYmxlIGRpZmZncjppZD0iVGVlRGF0YVRhYmxl
        MTIiIG1zZGF0YTpyb3dPcmRlcj0iMTEiIGRpZmZncjpoYXNDaGFuZ2VzPSJpbnNlcnRlZCI+PFg+MTE8
        L1g+PFk+NDU4PC9ZPjwvVGVlRGF0YVRhYmxlPjxUZWVEYXRhVGFibGUgZGlmZmdyOmlkPSJUZWVEYXRh
        VGFibGUxMyIgbXNkYXRhOnJvd09yZGVyPSIxMiIgZGlmZmdyOmhhc0NoYW5nZXM9Imluc2VydGVkIj48
        WD4xMjwvWD48WT40NTU8L1k+PC9UZWVEYXRhVGFibGU+PFRlZURhdGFUYWJsZSBkaWZmZ3I6aWQ9IlRl
        ZURhdGFUYWJsZTE0IiBtc2RhdGE6cm93T3JkZXI9IjEzIiBkaWZmZ3I6aGFzQ2hhbmdlcz0iaW5zZXJ0
        ZWQiPjxYPjEzPC9YPjxZPjM5NjwvWT48L1RlZURhdGFUYWJsZT48VGVlRGF0YVRhYmxlIGRpZmZncjpp
        ZD0iVGVlRGF0YVRhYmxlMTUiIG1zZGF0YTpyb3dPcmRlcj0iMTQiIGRpZmZncjpoYXNDaGFuZ2VzPSJp
        bnNlcnRlZCI+PFg+MTQ8L1g+PFk+NDI1PC9ZPjwvVGVlRGF0YVRhYmxlPjxUZWVEYXRhVGFibGUgZGlm
        ZmdyOmlkPSJUZWVEYXRhVGFibGUxNiIgbXNkYXRhOnJvd09yZGVyPSIxNSIgZGlmZmdyOmhhc0NoYW5n
        ZXM9Imluc2VydGVkIj48WD4xNTwvWD48WT40MjY8L1k+PC9UZWVEYXRhVGFibGU+PFRlZURhdGFUYWJs
        ZSBkaWZmZ3I6aWQ9IlRlZURhdGFUYWJsZTE3IiBtc2RhdGE6cm93T3JkZXI9IjE2IiBkaWZmZ3I6aGFz
        Q2hhbmdlcz0iaW5zZXJ0ZWQiPjxYPjE2PC9YPjxZPjQzMzwvWT48L1RlZURhdGFUYWJsZT48VGVlRGF0
        YVRhYmxlIGRpZmZncjppZD0iVGVlRGF0YVRhYmxlMTgiIG1zZGF0YTpyb3dPcmRlcj0iMTciIGRpZmZn
        cjpoYXNDaGFuZ2VzPSJpbnNlcnRlZCI+PFg+MTc8L1g+PFk+Mzk1PC9ZPjwvVGVlRGF0YVRhYmxlPjxU
        ZWVEYXRhVGFibGUgZGlmZmdyOmlkPSJUZWVEYXRhVGFibGUxOSIgbXNkYXRhOnJvd09yZGVyPSIxOCIg
        ZGlmZmdyOmhhc0NoYW5nZXM9Imluc2VydGVkIj48WD4xODwvWD48WT4zODM8L1k+PC9UZWVEYXRhVGFi
        bGU+PFRlZURhdGFUYWJsZSBkaWZmZ3I6aWQ9IlRlZURhdGFUYWJsZTIwIiBtc2RhdGE6cm93T3JkZXI9
        IjE5IiBkaWZmZ3I6aGFzQ2hhbmdlcz0iaW5zZXJ0ZWQiPjxYPjE5PC9YPjxZPjQwMzwvWT48L1RlZURh
        dGFUYWJsZT48VGVlRGF0YVRhYmxlIGRpZmZncjppZD0iVGVlRGF0YVRhYmxlMjEiIG1zZGF0YTpyb3dP
        cmRlcj0iMjAiIGRpZmZncjpoYXNDaGFuZ2VzPSJpbnNlcnRlZCI+PFg+MjA8L1g+PFk+Mzk1PC9ZPjwv
        VGVlRGF0YVRhYmxlPjxUZWVEYXRhVGFibGUgZGlmZmdyOmlkPSJUZWVEYXRhVGFibGUyMiIgbXNkYXRh
        OnJvd09yZGVyPSIyMSIgZGlmZmdyOmhhc0NoYW5nZXM9Imluc2VydGVkIj48WD4yMTwvWD48WT4zNTk8
        L1k+PC9UZWVEYXRhVGFibGU+PFRlZURhdGFUYWJsZSBkaWZmZ3I6aWQ9IlRlZURhdGFUYWJsZTIzIiBt
        c2RhdGE6cm93T3JkZXI9IjIyIiBkaWZmZ3I6aGFzQ2hhbmdlcz0iaW5zZXJ0ZWQiPjxYPjIyPC9YPjxZ
        PjM5MTwvWT48L1RlZURhdGFUYWJsZT48VGVlRGF0YVRhYmxlIGRpZmZncjppZD0iVGVlRGF0YVRhYmxl
        MjQiIG1zZGF0YTpyb3dPcmRlcj0iMjMiIGRpZmZncjpoYXNDaGFuZ2VzPSJpbnNlcnRlZCI+PFg+MjM8
        L1g+PFk+MzgyPC9ZPjwvVGVlRGF0YVRhYmxlPjxUZWVEYXRhVGFibGUgZGlmZmdyOmlkPSJUZWVEYXRh
        VGFibGUyNSIgbXNkYXRhOnJvd09yZGVyPSIyNCIgZGlmZmdyOmhhc0NoYW5nZXM9Imluc2VydGVkIj48
        WD4yNDwvWD48WT4zMzU8L1k+PC9UZWVEYXRhVGFibGU+PC9UZWVEYXRhU2V0PjwvZGlmZmdyOmRpZmZn
        cmFtPgQDAAAADlN5c3RlbS5WZXJzaW9uBAAAAAZfTWFqb3IGX01pbm9yBl9CdWlsZAlfUmV2aXNpb24A
        AAAACAgICAIAAAAAAAAA//////////8L
</value>
  </data>
  <metadata name="line22.TrayLocation" type="System.Drawing.Point, System.Drawing, Version=4.0.0.0, Culture=neutral, PublicKeyToken=b03f5f7f11d50a3a">
    <value>861, 146</value>
  </metadata>
  <data name="line22.DataSource" mimetype="application/x-microsoft.net.object.binary.base64">
    <value>
        AAEAAAD/////AQAAAAAAAAAMAgAAAE5TeXN0ZW0uRGF0YSwgVmVyc2lvbj00LjAuMC4wLCBDdWx0dXJl
        PW5ldXRyYWwsIFB1YmxpY0tleVRva2VuPWI3N2E1YzU2MTkzNGUwODkFAQAAABNTeXN0ZW0uRGF0YS5E
        YXRhU2V0AwAAABdEYXRhU2V0LlJlbW90aW5nVmVyc2lvbglYbWxTY2hlbWELWG1sRGlmZkdyYW0DAQEO
        U3lzdGVtLlZlcnNpb24CAAAACQMAAAAGBAAAAI4GPD94bWwgdmVyc2lvbj0iMS4wIiBlbmNvZGluZz0i
        dXRmLTE2Ij8+DQo8eHM6c2NoZW1hIGlkPSJUZWVEYXRhU2V0IiB4bWxucz0iIiB4bWxuczp4cz0iaHR0
        cDovL3d3dy53My5vcmcvMjAwMS9YTUxTY2hlbWEiIHhtbG5zOm1zZGF0YT0idXJuOnNjaGVtYXMtbWlj
        cm9zb2Z0LWNvbTp4bWwtbXNkYXRhIj4NCiAgPHhzOmVsZW1lbnQgbmFtZT0iVGVlRGF0YVNldCIgbXNk
        YXRhOklzRGF0YVNldD0idHJ1ZSIgbXNkYXRhOlVzZUN1cnJlbnRMb2NhbGU9InRydWUiPg0KICAgIDx4
        czpjb21wbGV4VHlwZT4NCiAgICAgIDx4czpjaG9pY2UgbWluT2NjdXJzPSIwIiBtYXhPY2N1cnM9InVu
        Ym91bmRlZCI+DQogICAgICAgIDx4czplbGVtZW50IG5hbWU9IlRlZURhdGFUYWJsZSI+DQogICAgICAg
        ICAgPHhzOmNvbXBsZXhUeXBlPg0KICAgICAgICAgICAgPHhzOnNlcXVlbmNlPg0KICAgICAgICAgICAg
        ICA8eHM6ZWxlbWVudCBuYW1lPSJYIiB0eXBlPSJ4czpkb3VibGUiIG1zZGF0YTp0YXJnZXROYW1lc3Bh
        Y2U9IiIgbWluT2NjdXJzPSIwIiAvPg0KICAgICAgICAgICAgICA8eHM6ZWxlbWVudCBuYW1lPSJZIiB0
        eXBlPSJ4czpkb3VibGUiIG1zZGF0YTp0YXJnZXROYW1lc3BhY2U9IiIgbWluT2NjdXJzPSIwIiAvPg0K
        ICAgICAgICAgICAgPC94czpzZXF1ZW5jZT4NCiAgICAgICAgICA8L3hzOmNvbXBsZXhUeXBlPg0KICAg
        ICAgICA8L3hzOmVsZW1lbnQ+DQogICAgICA8L3hzOmNob2ljZT4NCiAgICA8L3hzOmNvbXBsZXhUeXBl
        Pg0KICA8L3hzOmVsZW1lbnQ+DQo8L3hzOnNjaGVtYT4GBQAAAMEZPGRpZmZncjpkaWZmZ3JhbSB4bWxu
        czptc2RhdGE9InVybjpzY2hlbWFzLW1pY3Jvc29mdC1jb206eG1sLW1zZGF0YSIgeG1sbnM6ZGlmZmdy
        PSJ1cm46c2NoZW1hcy1taWNyb3NvZnQtY29tOnhtbC1kaWZmZ3JhbS12MSI+PFRlZURhdGFTZXQ+PFRl
        ZURhdGFUYWJsZSBkaWZmZ3I6aWQ9IlRlZURhdGFUYWJsZTEiIG1zZGF0YTpyb3dPcmRlcj0iMCIgZGlm
        ZmdyOmhhc0NoYW5nZXM9Imluc2VydGVkIj48WD4wPC9YPjxZPjUzMTwvWT48L1RlZURhdGFUYWJsZT48
        VGVlRGF0YVRhYmxlIGRpZmZncjppZD0iVGVlRGF0YVRhYmxlMiIgbXNkYXRhOnJvd09yZGVyPSIxIiBk
        aWZmZ3I6aGFzQ2hhbmdlcz0iaW5zZXJ0ZWQiPjxYPjE8L1g+PFk+NTY5PC9ZPjwvVGVlRGF0YVRhYmxl
        PjxUZWVEYXRhVGFibGUgZGlmZmdyOmlkPSJUZWVEYXRhVGFibGUzIiBtc2RhdGE6cm93T3JkZXI9IjIi
        IGRpZmZncjpoYXNDaGFuZ2VzPSJpbnNlcnRlZCI+PFg+MjwvWD48WT41MTE8L1k+PC9UZWVEYXRhVGFi
        bGU+PFRlZURhdGFUYWJsZSBkaWZmZ3I6aWQ9IlRlZURhdGFUYWJsZTQiIG1zZGF0YTpyb3dPcmRlcj0i
        MyIgZGlmZmdyOmhhc0NoYW5nZXM9Imluc2VydGVkIj48WD4zPC9YPjxZPjQwMTwvWT48L1RlZURhdGFU
        YWJsZT48VGVlRGF0YVRhYmxlIGRpZmZncjppZD0iVGVlRGF0YVRhYmxlNSIgbXNkYXRhOnJvd09yZGVy
        PSI0IiBkaWZmZ3I6aGFzQ2hhbmdlcz0iaW5zZXJ0ZWQiPjxYPjQ8L1g+PFk+NTEyPC9ZPjwvVGVlRGF0
        YVRhYmxlPjxUZWVEYXRhVGFibGUgZGlmZmdyOmlkPSJUZWVEYXRhVGFibGU2IiBtc2RhdGE6cm93T3Jk
        ZXI9IjUiIGRpZmZncjpoYXNDaGFuZ2VzPSJpbnNlcnRlZCI+PFg+NTwvWD48WT40NTg8L1k+PC9UZWVE
        YXRhVGFibGU+PFRlZURhdGFUYWJsZSBkaWZmZ3I6aWQ9IlRlZURhdGFUYWJsZTciIG1zZGF0YTpyb3dP
        cmRlcj0iNiIgZGlmZmdyOmhhc0NoYW5nZXM9Imluc2VydGVkIj48WD42PC9YPjxZPjM1MTwvWT48L1Rl
        ZURhdGFUYWJsZT48VGVlRGF0YVRhYmxlIGRpZmZncjppZD0iVGVlRGF0YVRhYmxlOCIgbXNkYXRhOnJv
        d09yZGVyPSI3IiBkaWZmZ3I6aGFzQ2hhbmdlcz0iaW5zZXJ0ZWQiPjxYPjc8L1g+PFk+NDQyPC9ZPjwv
        VGVlRGF0YVRhYmxlPjxUZWVEYXRhVGFibGUgZGlmZmdyOmlkPSJUZWVEYXRhVGFibGU5IiBtc2RhdGE6
        cm93T3JkZXI9IjgiIGRpZmZncjpoYXNDaGFuZ2VzPSJpbnNlcnRlZCI+PFg+ODwvWD48WT40NDE8L1k+
        PC9UZWVEYXRhVGFibGU+PFRlZURhdGFUYWJsZSBkaWZmZ3I6aWQ9IlRlZURhdGFUYWJsZTEwIiBtc2Rh
        dGE6cm93T3JkZXI9IjkiIGRpZmZncjpoYXNDaGFuZ2VzPSJpbnNlcnRlZCI+PFg+OTwvWD48WT40MTg8
        L1k+PC9UZWVEYXRhVGFibGU+PFRlZURhdGFUYWJsZSBkaWZmZ3I6aWQ9IlRlZURhdGFUYWJsZTExIiBt
        c2RhdGE6cm93T3JkZXI9IjEwIiBkaWZmZ3I6aGFzQ2hhbmdlcz0iaW5zZXJ0ZWQiPjxYPjEwPC9YPjxZ
        PjMxMzwvWT48L1RlZURhdGFUYWJsZT48VGVlRGF0YVRhYmxlIGRpZmZncjppZD0iVGVlRGF0YVRhYmxl
        MTIiIG1zZGF0YTpyb3dPcmRlcj0iMTEiIGRpZmZncjpoYXNDaGFuZ2VzPSJpbnNlcnRlZCI+PFg+MTE8
        L1g+PFk+MjgzPC9ZPjwvVGVlRGF0YVRhYmxlPjxUZWVEYXRhVGFibGUgZGlmZmdyOmlkPSJUZWVEYXRh
        VGFibGUxMyIgbXNkYXRhOnJvd09yZGVyPSIxMiIgZGlmZmdyOmhhc0NoYW5nZXM9Imluc2VydGVkIj48
        WD4xMjwvWD48WT4zODA8L1k+PC9UZWVEYXRhVGFibGU+PFRlZURhdGFUYWJsZSBkaWZmZ3I6aWQ9IlRl
        ZURhdGFUYWJsZTE0IiBtc2RhdGE6cm93T3JkZXI9IjEzIiBkaWZmZ3I6aGFzQ2hhbmdlcz0iaW5zZXJ0
        ZWQiPjxYPjEzPC9YPjxZPjQ2MjwvWT48L1RlZURhdGFUYWJsZT48VGVlRGF0YVRhYmxlIGRpZmZncjpp
        ZD0iVGVlRGF0YVRhYmxlMTUiIG1zZGF0YTpyb3dPcmRlcj0iMTQiIGRpZmZncjpoYXNDaGFuZ2VzPSJp
        bnNlcnRlZCI+PFg+MTQ8L1g+PFk+NDAxPC9ZPjwvVGVlRGF0YVRhYmxlPjxUZWVEYXRhVGFibGUgZGlm
        ZmdyOmlkPSJUZWVEYXRhVGFibGUxNiIgbXNkYXRhOnJvd09yZGVyPSIxNSIgZGlmZmdyOmhhc0NoYW5n
        ZXM9Imluc2VydGVkIj48WD4xNTwvWD48WT4zNjA8L1k+PC9UZWVEYXRhVGFibGU+PFRlZURhdGFUYWJs
        ZSBkaWZmZ3I6aWQ9IlRlZURhdGFUYWJsZTE3IiBtc2RhdGE6cm93T3JkZXI9IjE2IiBkaWZmZ3I6aGFz
        Q2hhbmdlcz0iaW5zZXJ0ZWQiPjxYPjE2PC9YPjxZPjQwMTwvWT48L1RlZURhdGFUYWJsZT48VGVlRGF0
        YVRhYmxlIGRpZmZncjppZD0iVGVlRGF0YVRhYmxlMTgiIG1zZGF0YTpyb3dPcmRlcj0iMTciIGRpZmZn
        cjpoYXNDaGFuZ2VzPSJpbnNlcnRlZCI+PFg+MTc8L1g+PFk+NDU4PC9ZPjwvVGVlRGF0YVRhYmxlPjxU
        ZWVEYXRhVGFibGUgZGlmZmdyOmlkPSJUZWVEYXRhVGFibGUxOSIgbXNkYXRhOnJvd09yZGVyPSIxOCIg
        ZGlmZmdyOmhhc0NoYW5nZXM9Imluc2VydGVkIj48WD4xODwvWD48WT4zOTk8L1k+PC9UZWVEYXRhVGFi
        bGU+PFRlZURhdGFUYWJsZSBkaWZmZ3I6aWQ9IlRlZURhdGFUYWJsZTIwIiBtc2RhdGE6cm93T3JkZXI9
        IjE5IiBkaWZmZ3I6aGFzQ2hhbmdlcz0iaW5zZXJ0ZWQiPjxYPjE5PC9YPjxZPjMxMTwvWT48L1RlZURh
        dGFUYWJsZT48VGVlRGF0YVRhYmxlIGRpZmZncjppZD0iVGVlRGF0YVRhYmxlMjEiIG1zZGF0YTpyb3dP
        cmRlcj0iMjAiIGRpZmZncjpoYXNDaGFuZ2VzPSJpbnNlcnRlZCI+PFg+MjA8L1g+PFk+MjAwPC9ZPjwv
        VGVlRGF0YVRhYmxlPjxUZWVEYXRhVGFibGUgZGlmZmdyOmlkPSJUZWVEYXRhVGFibGUyMiIgbXNkYXRh
        OnJvd09yZGVyPSIyMSIgZGlmZmdyOmhhc0NoYW5nZXM9Imluc2VydGVkIj48WD4yMTwvWD48WT4zMjQ8
        L1k+PC9UZWVEYXRhVGFibGU+PFRlZURhdGFUYWJsZSBkaWZmZ3I6aWQ9IlRlZURhdGFUYWJsZTIzIiBt
        c2RhdGE6cm93T3JkZXI9IjIyIiBkaWZmZ3I6aGFzQ2hhbmdlcz0iaW5zZXJ0ZWQiPjxYPjIyPC9YPjxZ
        PjI5NjwvWT48L1RlZURhdGFUYWJsZT48VGVlRGF0YVRhYmxlIGRpZmZncjppZD0iVGVlRGF0YVRhYmxl
        MjQiIG1zZGF0YTpyb3dPcmRlcj0iMjMiIGRpZmZncjpoYXNDaGFuZ2VzPSJpbnNlcnRlZCI+PFg+MjM8
        L1g+PFk+MjE1PC9ZPjwvVGVlRGF0YVRhYmxlPjxUZWVEYXRhVGFibGUgZGlmZmdyOmlkPSJUZWVEYXRh
        VGFibGUyNSIgbXNkYXRhOnJvd09yZGVyPSIyNCIgZGlmZmdyOmhhc0NoYW5nZXM9Imluc2VydGVkIj48
        WD4yNDwvWD48WT4yNjU8L1k+PC9UZWVEYXRhVGFibGU+PC9UZWVEYXRhU2V0PjwvZGlmZmdyOmRpZmZn
        cmFtPgQDAAAADlN5c3RlbS5WZXJzaW9uBAAAAAZfTWFqb3IGX01pbm9yBl9CdWlsZAlfUmV2aXNpb24A
        AAAACAgICAIAAAAAAAAA//////////8L
</value>
  </data>
  <metadata name="line26.TrayLocation" type="System.Drawing.Point, System.Drawing, Version=4.0.0.0, Culture=neutral, PublicKeyToken=b03f5f7f11d50a3a">
    <value>397, 191</value>
  </metadata>
  <data name="line26.DataSource" mimetype="application/x-microsoft.net.object.binary.base64">
    <value>
        AAEAAAD/////AQAAAAAAAAAMAgAAAE5TeXN0ZW0uRGF0YSwgVmVyc2lvbj00LjAuMC4wLCBDdWx0dXJl
        PW5ldXRyYWwsIFB1YmxpY0tleVRva2VuPWI3N2E1YzU2MTkzNGUwODkFAQAAABNTeXN0ZW0uRGF0YS5E
        YXRhU2V0AwAAABdEYXRhU2V0LlJlbW90aW5nVmVyc2lvbglYbWxTY2hlbWELWG1sRGlmZkdyYW0DAQEO
        U3lzdGVtLlZlcnNpb24CAAAACQMAAAAGBAAAAI4GPD94bWwgdmVyc2lvbj0iMS4wIiBlbmNvZGluZz0i
        dXRmLTE2Ij8+DQo8eHM6c2NoZW1hIGlkPSJUZWVEYXRhU2V0IiB4bWxucz0iIiB4bWxuczp4cz0iaHR0
        cDovL3d3dy53My5vcmcvMjAwMS9YTUxTY2hlbWEiIHhtbG5zOm1zZGF0YT0idXJuOnNjaGVtYXMtbWlj
        cm9zb2Z0LWNvbTp4bWwtbXNkYXRhIj4NCiAgPHhzOmVsZW1lbnQgbmFtZT0iVGVlRGF0YVNldCIgbXNk
        YXRhOklzRGF0YVNldD0idHJ1ZSIgbXNkYXRhOlVzZUN1cnJlbnRMb2NhbGU9InRydWUiPg0KICAgIDx4
        czpjb21wbGV4VHlwZT4NCiAgICAgIDx4czpjaG9pY2UgbWluT2NjdXJzPSIwIiBtYXhPY2N1cnM9InVu
        Ym91bmRlZCI+DQogICAgICAgIDx4czplbGVtZW50IG5hbWU9IlRlZURhdGFUYWJsZSI+DQogICAgICAg
        ICAgPHhzOmNvbXBsZXhUeXBlPg0KICAgICAgICAgICAgPHhzOnNlcXVlbmNlPg0KICAgICAgICAgICAg
        ICA8eHM6ZWxlbWVudCBuYW1lPSJYIiB0eXBlPSJ4czpkb3VibGUiIG1zZGF0YTp0YXJnZXROYW1lc3Bh
        Y2U9IiIgbWluT2NjdXJzPSIwIiAvPg0KICAgICAgICAgICAgICA8eHM6ZWxlbWVudCBuYW1lPSJZIiB0
        eXBlPSJ4czpkb3VibGUiIG1zZGF0YTp0YXJnZXROYW1lc3BhY2U9IiIgbWluT2NjdXJzPSIwIiAvPg0K
        ICAgICAgICAgICAgPC94czpzZXF1ZW5jZT4NCiAgICAgICAgICA8L3hzOmNvbXBsZXhUeXBlPg0KICAg
        ICAgICA8L3hzOmVsZW1lbnQ+DQogICAgICA8L3hzOmNob2ljZT4NCiAgICA8L3hzOmNvbXBsZXhUeXBl
        Pg0KICA8L3hzOmVsZW1lbnQ+DQo8L3hzOnNjaGVtYT4GBQAAAMEZPGRpZmZncjpkaWZmZ3JhbSB4bWxu
        czptc2RhdGE9InVybjpzY2hlbWFzLW1pY3Jvc29mdC1jb206eG1sLW1zZGF0YSIgeG1sbnM6ZGlmZmdy
        PSJ1cm46c2NoZW1hcy1taWNyb3NvZnQtY29tOnhtbC1kaWZmZ3JhbS12MSI+PFRlZURhdGFTZXQ+PFRl
        ZURhdGFUYWJsZSBkaWZmZ3I6aWQ9IlRlZURhdGFUYWJsZTEiIG1zZGF0YTpyb3dPcmRlcj0iMCIgZGlm
        ZmdyOmhhc0NoYW5nZXM9Imluc2VydGVkIj48WD4wPC9YPjxZPjI2MzwvWT48L1RlZURhdGFUYWJsZT48
        VGVlRGF0YVRhYmxlIGRpZmZncjppZD0iVGVlRGF0YVRhYmxlMiIgbXNkYXRhOnJvd09yZGVyPSIxIiBk
        aWZmZ3I6aGFzQ2hhbmdlcz0iaW5zZXJ0ZWQiPjxYPjE8L1g+PFk+MjU3PC9ZPjwvVGVlRGF0YVRhYmxl
        PjxUZWVEYXRhVGFibGUgZGlmZmdyOmlkPSJUZWVEYXRhVGFibGUzIiBtc2RhdGE6cm93T3JkZXI9IjIi
        IGRpZmZncjpoYXNDaGFuZ2VzPSJpbnNlcnRlZCI+PFg+MjwvWD48WT4yODQ8L1k+PC9UZWVEYXRhVGFi
        bGU+PFRlZURhdGFUYWJsZSBkaWZmZ3I6aWQ9IlRlZURhdGFUYWJsZTQiIG1zZGF0YTpyb3dPcmRlcj0i
        MyIgZGlmZmdyOmhhc0NoYW5nZXM9Imluc2VydGVkIj48WD4zPC9YPjxZPjMxODwvWT48L1RlZURhdGFU
        YWJsZT48VGVlRGF0YVRhYmxlIGRpZmZncjppZD0iVGVlRGF0YVRhYmxlNSIgbXNkYXRhOnJvd09yZGVy
        PSI0IiBkaWZmZ3I6aGFzQ2hhbmdlcz0iaW5zZXJ0ZWQiPjxYPjQ8L1g+PFk+MzQ3PC9ZPjwvVGVlRGF0
        YVRhYmxlPjxUZWVEYXRhVGFibGUgZGlmZmdyOmlkPSJUZWVEYXRhVGFibGU2IiBtc2RhdGE6cm93T3Jk
        ZXI9IjUiIGRpZmZncjpoYXNDaGFuZ2VzPSJpbnNlcnRlZCI+PFg+NTwvWD48WT4zODI8L1k+PC9UZWVE
        YXRhVGFibGU+PFRlZURhdGFUYWJsZSBkaWZmZ3I6aWQ9IlRlZURhdGFUYWJsZTciIG1zZGF0YTpyb3dP
        cmRlcj0iNiIgZGlmZmdyOmhhc0NoYW5nZXM9Imluc2VydGVkIj48WD42PC9YPjxZPjM2OTwvWT48L1Rl
        ZURhdGFUYWJsZT48VGVlRGF0YVRhYmxlIGRpZmZncjppZD0iVGVlRGF0YVRhYmxlOCIgbXNkYXRhOnJv
        d09yZGVyPSI3IiBkaWZmZ3I6aGFzQ2hhbmdlcz0iaW5zZXJ0ZWQiPjxYPjc8L1g+PFk+MzYwPC9ZPjwv
        VGVlRGF0YVRhYmxlPjxUZWVEYXRhVGFibGUgZGlmZmdyOmlkPSJUZWVEYXRhVGFibGU5IiBtc2RhdGE6
        cm93T3JkZXI9IjgiIGRpZmZncjpoYXNDaGFuZ2VzPSJpbnNlcnRlZCI+PFg+ODwvWD48WT4zMTU8L1k+
        PC9UZWVEYXRhVGFibGU+PFRlZURhdGFUYWJsZSBkaWZmZ3I6aWQ9IlRlZURhdGFUYWJsZTEwIiBtc2Rh
        dGE6cm93T3JkZXI9IjkiIGRpZmZncjpoYXNDaGFuZ2VzPSJpbnNlcnRlZCI+PFg+OTwvWD48WT4zMTA8
        L1k+PC9UZWVEYXRhVGFibGU+PFRlZURhdGFUYWJsZSBkaWZmZ3I6aWQ9IlRlZURhdGFUYWJsZTExIiBt
        c2RhdGE6cm93T3JkZXI9IjEwIiBkaWZmZ3I6aGFzQ2hhbmdlcz0iaW5zZXJ0ZWQiPjxYPjEwPC9YPjxZ
        PjMzMjwvWT48L1RlZURhdGFUYWJsZT48VGVlRGF0YVRhYmxlIGRpZmZncjppZD0iVGVlRGF0YVRhYmxl
        MTIiIG1zZGF0YTpyb3dPcmRlcj0iMTEiIGRpZmZncjpoYXNDaGFuZ2VzPSJpbnNlcnRlZCI+PFg+MTE8
        L1g+PFk+MzU4PC9ZPjwvVGVlRGF0YVRhYmxlPjxUZWVEYXRhVGFibGUgZGlmZmdyOmlkPSJUZWVEYXRh
        VGFibGUxMyIgbXNkYXRhOnJvd09yZGVyPSIxMiIgZGlmZmdyOmhhc0NoYW5nZXM9Imluc2VydGVkIj48
        WD4xMjwvWD48WT4zNDU8L1k+PC9UZWVEYXRhVGFibGU+PFRlZURhdGFUYWJsZSBkaWZmZ3I6aWQ9IlRl
        ZURhdGFUYWJsZTE0IiBtc2RhdGE6cm93T3JkZXI9IjEzIiBkaWZmZ3I6aGFzQ2hhbmdlcz0iaW5zZXJ0
        ZWQiPjxYPjEzPC9YPjxZPjM4NjwvWT48L1RlZURhdGFUYWJsZT48VGVlRGF0YVRhYmxlIGRpZmZncjpp
        ZD0iVGVlRGF0YVRhYmxlMTUiIG1zZGF0YTpyb3dPcmRlcj0iMTQiIGRpZmZncjpoYXNDaGFuZ2VzPSJp
        bnNlcnRlZCI+PFg+MTQ8L1g+PFk+NDE4PC9ZPjwvVGVlRGF0YVRhYmxlPjxUZWVEYXRhVGFibGUgZGlm
        ZmdyOmlkPSJUZWVEYXRhVGFibGUxNiIgbXNkYXRhOnJvd09yZGVyPSIxNSIgZGlmZmdyOmhhc0NoYW5n
        ZXM9Imluc2VydGVkIj48WD4xNTwvWD48WT40MDM8L1k+PC9UZWVEYXRhVGFibGU+PFRlZURhdGFUYWJs
        ZSBkaWZmZ3I6aWQ9IlRlZURhdGFUYWJsZTE3IiBtc2RhdGE6cm93T3JkZXI9IjE2IiBkaWZmZ3I6aGFz
        Q2hhbmdlcz0iaW5zZXJ0ZWQiPjxYPjE2PC9YPjxZPjQwODwvWT48L1RlZURhdGFUYWJsZT48VGVlRGF0
        YVRhYmxlIGRpZmZncjppZD0iVGVlRGF0YVRhYmxlMTgiIG1zZGF0YTpyb3dPcmRlcj0iMTciIGRpZmZn
        cjpoYXNDaGFuZ2VzPSJpbnNlcnRlZCI+PFg+MTc8L1g+PFk+Mzg5PC9ZPjwvVGVlRGF0YVRhYmxlPjxU
        ZWVEYXRhVGFibGUgZGlmZmdyOmlkPSJUZWVEYXRhVGFibGUxOSIgbXNkYXRhOnJvd09yZGVyPSIxOCIg
        ZGlmZmdyOmhhc0NoYW5nZXM9Imluc2VydGVkIj48WD4xODwvWD48WT40MjY8L1k+PC9UZWVEYXRhVGFi
        bGU+PFRlZURhdGFUYWJsZSBkaWZmZ3I6aWQ9IlRlZURhdGFUYWJsZTIwIiBtc2RhdGE6cm93T3JkZXI9
        IjE5IiBkaWZmZ3I6aGFzQ2hhbmdlcz0iaW5zZXJ0ZWQiPjxYPjE5PC9YPjxZPjQwMDwvWT48L1RlZURh
        dGFUYWJsZT48VGVlRGF0YVRhYmxlIGRpZmZncjppZD0iVGVlRGF0YVRhYmxlMjEiIG1zZGF0YTpyb3dP
        cmRlcj0iMjAiIGRpZmZncjpoYXNDaGFuZ2VzPSJpbnNlcnRlZCI+PFg+MjA8L1g+PFk+NDQwPC9ZPjwv
        VGVlRGF0YVRhYmxlPjxUZWVEYXRhVGFibGUgZGlmZmdyOmlkPSJUZWVEYXRhVGFibGUyMiIgbXNkYXRh
        OnJvd09yZGVyPSIyMSIgZGlmZmdyOmhhc0NoYW5nZXM9Imluc2VydGVkIj48WD4yMTwvWD48WT40MzI8
        L1k+PC9UZWVEYXRhVGFibGU+PFRlZURhdGFUYWJsZSBkaWZmZ3I6aWQ9IlRlZURhdGFUYWJsZTIzIiBt
        c2RhdGE6cm93T3JkZXI9IjIyIiBkaWZmZ3I6aGFzQ2hhbmdlcz0iaW5zZXJ0ZWQiPjxYPjIyPC9YPjxZ
        PjQ0MDwvWT48L1RlZURhdGFUYWJsZT48VGVlRGF0YVRhYmxlIGRpZmZncjppZD0iVGVlRGF0YVRhYmxl
        MjQiIG1zZGF0YTpyb3dPcmRlcj0iMjMiIGRpZmZncjpoYXNDaGFuZ2VzPSJpbnNlcnRlZCI+PFg+MjM8
        L1g+PFk+NDMwPC9ZPjwvVGVlRGF0YVRhYmxlPjxUZWVEYXRhVGFibGUgZGlmZmdyOmlkPSJUZWVEYXRh
        VGFibGUyNSIgbXNkYXRhOnJvd09yZGVyPSIyNCIgZGlmZmdyOmhhc0NoYW5nZXM9Imluc2VydGVkIj48
        WD4yNDwvWD48WT40NDM8L1k+PC9UZWVEYXRhVGFibGU+PC9UZWVEYXRhU2V0PjwvZGlmZmdyOmRpZmZn
        cmFtPgQDAAAADlN5c3RlbS5WZXJzaW9uBAAAAAZfTWFqb3IGX01pbm9yBl9CdWlsZAlfUmV2aXNpb24A
        AAAACAgICAIAAAAAAAAA//////////8L
</value>
  </data>
  <metadata name="line23.TrayLocation" type="System.Drawing.Point, System.Drawing, Version=4.0.0.0, Culture=neutral, PublicKeyToken=b03f5f7f11d50a3a">
    <value>17, 191</value>
  </metadata>
  <data name="line23.DataSource" mimetype="application/x-microsoft.net.object.binary.base64">
    <value>
        AAEAAAD/////AQAAAAAAAAAMAgAAAE5TeXN0ZW0uRGF0YSwgVmVyc2lvbj00LjAuMC4wLCBDdWx0dXJl
        PW5ldXRyYWwsIFB1YmxpY0tleVRva2VuPWI3N2E1YzU2MTkzNGUwODkFAQAAABNTeXN0ZW0uRGF0YS5E
        YXRhU2V0AwAAABdEYXRhU2V0LlJlbW90aW5nVmVyc2lvbglYbWxTY2hlbWELWG1sRGlmZkdyYW0DAQEO
        U3lzdGVtLlZlcnNpb24CAAAACQMAAAAGBAAAAI4GPD94bWwgdmVyc2lvbj0iMS4wIiBlbmNvZGluZz0i
        dXRmLTE2Ij8+DQo8eHM6c2NoZW1hIGlkPSJUZWVEYXRhU2V0IiB4bWxucz0iIiB4bWxuczp4cz0iaHR0
        cDovL3d3dy53My5vcmcvMjAwMS9YTUxTY2hlbWEiIHhtbG5zOm1zZGF0YT0idXJuOnNjaGVtYXMtbWlj
        cm9zb2Z0LWNvbTp4bWwtbXNkYXRhIj4NCiAgPHhzOmVsZW1lbnQgbmFtZT0iVGVlRGF0YVNldCIgbXNk
        YXRhOklzRGF0YVNldD0idHJ1ZSIgbXNkYXRhOlVzZUN1cnJlbnRMb2NhbGU9InRydWUiPg0KICAgIDx4
        czpjb21wbGV4VHlwZT4NCiAgICAgIDx4czpjaG9pY2UgbWluT2NjdXJzPSIwIiBtYXhPY2N1cnM9InVu
        Ym91bmRlZCI+DQogICAgICAgIDx4czplbGVtZW50IG5hbWU9IlRlZURhdGFUYWJsZSI+DQogICAgICAg
        ICAgPHhzOmNvbXBsZXhUeXBlPg0KICAgICAgICAgICAgPHhzOnNlcXVlbmNlPg0KICAgICAgICAgICAg
        ICA8eHM6ZWxlbWVudCBuYW1lPSJYIiB0eXBlPSJ4czpkb3VibGUiIG1zZGF0YTp0YXJnZXROYW1lc3Bh
        Y2U9IiIgbWluT2NjdXJzPSIwIiAvPg0KICAgICAgICAgICAgICA8eHM6ZWxlbWVudCBuYW1lPSJZIiB0
        eXBlPSJ4czpkb3VibGUiIG1zZGF0YTp0YXJnZXROYW1lc3BhY2U9IiIgbWluT2NjdXJzPSIwIiAvPg0K
        ICAgICAgICAgICAgPC94czpzZXF1ZW5jZT4NCiAgICAgICAgICA8L3hzOmNvbXBsZXhUeXBlPg0KICAg
        ICAgICA8L3hzOmVsZW1lbnQ+DQogICAgICA8L3hzOmNob2ljZT4NCiAgICA8L3hzOmNvbXBsZXhUeXBl
        Pg0KICA8L3hzOmVsZW1lbnQ+DQo8L3hzOnNjaGVtYT4GBQAAALgZPGRpZmZncjpkaWZmZ3JhbSB4bWxu
        czptc2RhdGE9InVybjpzY2hlbWFzLW1pY3Jvc29mdC1jb206eG1sLW1zZGF0YSIgeG1sbnM6ZGlmZmdy
        PSJ1cm46c2NoZW1hcy1taWNyb3NvZnQtY29tOnhtbC1kaWZmZ3JhbS12MSI+PFRlZURhdGFTZXQ+PFRl
        ZURhdGFUYWJsZSBkaWZmZ3I6aWQ9IlRlZURhdGFUYWJsZTEiIG1zZGF0YTpyb3dPcmRlcj0iMCIgZGlm
        ZmdyOmhhc0NoYW5nZXM9Imluc2VydGVkIj48WD4wPC9YPjxZPjE1NTwvWT48L1RlZURhdGFUYWJsZT48
        VGVlRGF0YVRhYmxlIGRpZmZncjppZD0iVGVlRGF0YVRhYmxlMiIgbXNkYXRhOnJvd09yZGVyPSIxIiBk
        aWZmZ3I6aGFzQ2hhbmdlcz0iaW5zZXJ0ZWQiPjxYPjE8L1g+PFk+MTYyPC9ZPjwvVGVlRGF0YVRhYmxl
        PjxUZWVEYXRhVGFibGUgZGlmZmdyOmlkPSJUZWVEYXRhVGFibGUzIiBtc2RhdGE6cm93T3JkZXI9IjIi
        IGRpZmZncjpoYXNDaGFuZ2VzPSJpbnNlcnRlZCI+PFg+MjwvWD48WT41MjwvWT48L1RlZURhdGFUYWJs
        ZT48VGVlRGF0YVRhYmxlIGRpZmZncjppZD0iVGVlRGF0YVRhYmxlNCIgbXNkYXRhOnJvd09yZGVyPSIz
        IiBkaWZmZ3I6aGFzQ2hhbmdlcz0iaW5zZXJ0ZWQiPjxYPjM8L1g+PFk+MzwvWT48L1RlZURhdGFUYWJs
        ZT48VGVlRGF0YVRhYmxlIGRpZmZncjppZD0iVGVlRGF0YVRhYmxlNSIgbXNkYXRhOnJvd09yZGVyPSI0
        IiBkaWZmZ3I6aGFzQ2hhbmdlcz0iaW5zZXJ0ZWQiPjxYPjQ8L1g+PFk+NjI8L1k+PC9UZWVEYXRhVGFi
        bGU+PFRlZURhdGFUYWJsZSBkaWZmZ3I6aWQ9IlRlZURhdGFUYWJsZTYiIG1zZGF0YTpyb3dPcmRlcj0i
        NSIgZGlmZmdyOmhhc0NoYW5nZXM9Imluc2VydGVkIj48WD41PC9YPjxZPjEzOTwvWT48L1RlZURhdGFU
        YWJsZT48VGVlRGF0YVRhYmxlIGRpZmZncjppZD0iVGVlRGF0YVRhYmxlNyIgbXNkYXRhOnJvd09yZGVy
        PSI2IiBkaWZmZ3I6aGFzQ2hhbmdlcz0iaW5zZXJ0ZWQiPjxYPjY8L1g+PFk+MTUzPC9ZPjwvVGVlRGF0
        YVRhYmxlPjxUZWVEYXRhVGFibGUgZGlmZmdyOmlkPSJUZWVEYXRhVGFibGU4IiBtc2RhdGE6cm93T3Jk
        ZXI9IjciIGRpZmZncjpoYXNDaGFuZ2VzPSJpbnNlcnRlZCI+PFg+NzwvWD48WT4xNjk8L1k+PC9UZWVE
        YXRhVGFibGU+PFRlZURhdGFUYWJsZSBkaWZmZ3I6aWQ9IlRlZURhdGFUYWJsZTkiIG1zZGF0YTpyb3dP
        cmRlcj0iOCIgZGlmZmdyOmhhc0NoYW5nZXM9Imluc2VydGVkIj48WD44PC9YPjxZPjE4MDwvWT48L1Rl
        ZURhdGFUYWJsZT48VGVlRGF0YVRhYmxlIGRpZmZncjppZD0iVGVlRGF0YVRhYmxlMTAiIG1zZGF0YTpy
        b3dPcmRlcj0iOSIgZGlmZmdyOmhhc0NoYW5nZXM9Imluc2VydGVkIj48WD45PC9YPjxZPjEwNTwvWT48
        L1RlZURhdGFUYWJsZT48VGVlRGF0YVRhYmxlIGRpZmZncjppZD0iVGVlRGF0YVRhYmxlMTEiIG1zZGF0
        YTpyb3dPcmRlcj0iMTAiIGRpZmZncjpoYXNDaGFuZ2VzPSJpbnNlcnRlZCI+PFg+MTA8L1g+PFk+ODwv
        WT48L1RlZURhdGFUYWJsZT48VGVlRGF0YVRhYmxlIGRpZmZncjppZD0iVGVlRGF0YVRhYmxlMTIiIG1z
        ZGF0YTpyb3dPcmRlcj0iMTEiIGRpZmZncjpoYXNDaGFuZ2VzPSJpbnNlcnRlZCI+PFg+MTE8L1g+PFk+
        NDc8L1k+PC9UZWVEYXRhVGFibGU+PFRlZURhdGFUYWJsZSBkaWZmZ3I6aWQ9IlRlZURhdGFUYWJsZTEz
        IiBtc2RhdGE6cm93T3JkZXI9IjEyIiBkaWZmZ3I6aGFzQ2hhbmdlcz0iaW5zZXJ0ZWQiPjxYPjEyPC9Y
        PjxZPjIxPC9ZPjwvVGVlRGF0YVRhYmxlPjxUZWVEYXRhVGFibGUgZGlmZmdyOmlkPSJUZWVEYXRhVGFi
        bGUxNCIgbXNkYXRhOnJvd09yZGVyPSIxMyIgZGlmZmdyOmhhc0NoYW5nZXM9Imluc2VydGVkIj48WD4x
        MzwvWD48WT44ODwvWT48L1RlZURhdGFUYWJsZT48VGVlRGF0YVRhYmxlIGRpZmZncjppZD0iVGVlRGF0
        YVRhYmxlMTUiIG1zZGF0YTpyb3dPcmRlcj0iMTQiIGRpZmZncjpoYXNDaGFuZ2VzPSJpbnNlcnRlZCI+
        PFg+MTQ8L1g+PFk+MTAyPC9ZPjwvVGVlRGF0YVRhYmxlPjxUZWVEYXRhVGFibGUgZGlmZmdyOmlkPSJU
        ZWVEYXRhVGFibGUxNiIgbXNkYXRhOnJvd09yZGVyPSIxNSIgZGlmZmdyOmhhc0NoYW5nZXM9Imluc2Vy
        dGVkIj48WD4xNTwvWD48WT4yMjE8L1k+PC9UZWVEYXRhVGFibGU+PFRlZURhdGFUYWJsZSBkaWZmZ3I6
        aWQ9IlRlZURhdGFUYWJsZTE3IiBtc2RhdGE6cm93T3JkZXI9IjE2IiBkaWZmZ3I6aGFzQ2hhbmdlcz0i
        aW5zZXJ0ZWQiPjxYPjE2PC9YPjxZPjMyMjwvWT48L1RlZURhdGFUYWJsZT48VGVlRGF0YVRhYmxlIGRp
        ZmZncjppZD0iVGVlRGF0YVRhYmxlMTgiIG1zZGF0YTpyb3dPcmRlcj0iMTciIGRpZmZncjpoYXNDaGFu
        Z2VzPSJpbnNlcnRlZCI+PFg+MTc8L1g+PFk+NDM3PC9ZPjwvVGVlRGF0YVRhYmxlPjxUZWVEYXRhVGFi
        bGUgZGlmZmdyOmlkPSJUZWVEYXRhVGFibGUxOSIgbXNkYXRhOnJvd09yZGVyPSIxOCIgZGlmZmdyOmhh
        c0NoYW5nZXM9Imluc2VydGVkIj48WD4xODwvWD48WT40NTI8L1k+PC9UZWVEYXRhVGFibGU+PFRlZURh
        dGFUYWJsZSBkaWZmZ3I6aWQ9IlRlZURhdGFUYWJsZTIwIiBtc2RhdGE6cm93T3JkZXI9IjE5IiBkaWZm
        Z3I6aGFzQ2hhbmdlcz0iaW5zZXJ0ZWQiPjxYPjE5PC9YPjxZPjQ0NTwvWT48L1RlZURhdGFUYWJsZT48
        VGVlRGF0YVRhYmxlIGRpZmZncjppZD0iVGVlRGF0YVRhYmxlMjEiIG1zZGF0YTpyb3dPcmRlcj0iMjAi
        IGRpZmZncjpoYXNDaGFuZ2VzPSJpbnNlcnRlZCI+PFg+MjA8L1g+PFk+MzI0PC9ZPjwvVGVlRGF0YVRh
        YmxlPjxUZWVEYXRhVGFibGUgZGlmZmdyOmlkPSJUZWVEYXRhVGFibGUyMiIgbXNkYXRhOnJvd09yZGVy
        PSIyMSIgZGlmZmdyOmhhc0NoYW5nZXM9Imluc2VydGVkIj48WD4yMTwvWD48WT4zMTQ8L1k+PC9UZWVE
        YXRhVGFibGU+PFRlZURhdGFUYWJsZSBkaWZmZ3I6aWQ9IlRlZURhdGFUYWJsZTIzIiBtc2RhdGE6cm93
        T3JkZXI9IjIyIiBkaWZmZ3I6aGFzQ2hhbmdlcz0iaW5zZXJ0ZWQiPjxYPjIyPC9YPjxZPjIwNzwvWT48
        L1RlZURhdGFUYWJsZT48VGVlRGF0YVRhYmxlIGRpZmZncjppZD0iVGVlRGF0YVRhYmxlMjQiIG1zZGF0
        YTpyb3dPcmRlcj0iMjMiIGRpZmZncjpoYXNDaGFuZ2VzPSJpbnNlcnRlZCI+PFg+MjM8L1g+PFk+MTk3
        PC9ZPjwvVGVlRGF0YVRhYmxlPjxUZWVEYXRhVGFibGUgZGlmZmdyOmlkPSJUZWVEYXRhVGFibGUyNSIg
        bXNkYXRhOnJvd09yZGVyPSIyNCIgZGlmZmdyOmhhc0NoYW5nZXM9Imluc2VydGVkIj48WD4yNDwvWD48
        WT4xOTc8L1k+PC9UZWVEYXRhVGFibGU+PC9UZWVEYXRhU2V0PjwvZGlmZmdyOmRpZmZncmFtPgQDAAAA
        DlN5c3RlbS5WZXJzaW9uBAAAAAZfTWFqb3IGX01pbm9yBl9CdWlsZAlfUmV2aXNpb24AAAAACAgICAIA
        AAAAAAAA//////////8L
</value>
  </data>
  <metadata name="line17.TrayLocation" type="System.Drawing.Point, System.Drawing, Version=4.0.0.0, Culture=neutral, PublicKeyToken=b03f5f7f11d50a3a">
    <value>386, 146</value>
  </metadata>
  <data name="line17.DataSource" mimetype="application/x-microsoft.net.object.binary.base64">
    <value>
        AAEAAAD/////AQAAAAAAAAAMAgAAAE5TeXN0ZW0uRGF0YSwgVmVyc2lvbj00LjAuMC4wLCBDdWx0dXJl
        PW5ldXRyYWwsIFB1YmxpY0tleVRva2VuPWI3N2E1YzU2MTkzNGUwODkFAQAAABNTeXN0ZW0uRGF0YS5E
        YXRhU2V0AwAAABdEYXRhU2V0LlJlbW90aW5nVmVyc2lvbglYbWxTY2hlbWELWG1sRGlmZkdyYW0DAQEO
        U3lzdGVtLlZlcnNpb24CAAAACQMAAAAGBAAAAI4GPD94bWwgdmVyc2lvbj0iMS4wIiBlbmNvZGluZz0i
        dXRmLTE2Ij8+DQo8eHM6c2NoZW1hIGlkPSJUZWVEYXRhU2V0IiB4bWxucz0iIiB4bWxuczp4cz0iaHR0
        cDovL3d3dy53My5vcmcvMjAwMS9YTUxTY2hlbWEiIHhtbG5zOm1zZGF0YT0idXJuOnNjaGVtYXMtbWlj
        cm9zb2Z0LWNvbTp4bWwtbXNkYXRhIj4NCiAgPHhzOmVsZW1lbnQgbmFtZT0iVGVlRGF0YVNldCIgbXNk
        YXRhOklzRGF0YVNldD0idHJ1ZSIgbXNkYXRhOlVzZUN1cnJlbnRMb2NhbGU9InRydWUiPg0KICAgIDx4
        czpjb21wbGV4VHlwZT4NCiAgICAgIDx4czpjaG9pY2UgbWluT2NjdXJzPSIwIiBtYXhPY2N1cnM9InVu
        Ym91bmRlZCI+DQogICAgICAgIDx4czplbGVtZW50IG5hbWU9IlRlZURhdGFUYWJsZSI+DQogICAgICAg
        ICAgPHhzOmNvbXBsZXhUeXBlPg0KICAgICAgICAgICAgPHhzOnNlcXVlbmNlPg0KICAgICAgICAgICAg
        ICA8eHM6ZWxlbWVudCBuYW1lPSJYIiB0eXBlPSJ4czpkb3VibGUiIG1zZGF0YTp0YXJnZXROYW1lc3Bh
        Y2U9IiIgbWluT2NjdXJzPSIwIiAvPg0KICAgICAgICAgICAgICA8eHM6ZWxlbWVudCBuYW1lPSJZIiB0
        eXBlPSJ4czpkb3VibGUiIG1zZGF0YTp0YXJnZXROYW1lc3BhY2U9IiIgbWluT2NjdXJzPSIwIiAvPg0K
        ICAgICAgICAgICAgPC94czpzZXF1ZW5jZT4NCiAgICAgICAgICA8L3hzOmNvbXBsZXhUeXBlPg0KICAg
        ICAgICA8L3hzOmVsZW1lbnQ+DQogICAgICA8L3hzOmNob2ljZT4NCiAgICA8L3hzOmNvbXBsZXhUeXBl
        Pg0KICA8L3hzOmVsZW1lbnQ+DQo8L3hzOnNjaGVtYT4GBQAAAMQZPGRpZmZncjpkaWZmZ3JhbSB4bWxu
        czptc2RhdGE9InVybjpzY2hlbWFzLW1pY3Jvc29mdC1jb206eG1sLW1zZGF0YSIgeG1sbnM6ZGlmZmdy
        PSJ1cm46c2NoZW1hcy1taWNyb3NvZnQtY29tOnhtbC1kaWZmZ3JhbS12MSI+PFRlZURhdGFTZXQ+PFRl
        ZURhdGFUYWJsZSBkaWZmZ3I6aWQ9IlRlZURhdGFUYWJsZTEiIG1zZGF0YTpyb3dPcmRlcj0iMCIgZGlm
        ZmdyOmhhc0NoYW5nZXM9Imluc2VydGVkIj48WD4wPC9YPjxZPjU4NDwvWT48L1RlZURhdGFUYWJsZT48
        VGVlRGF0YVRhYmxlIGRpZmZncjppZD0iVGVlRGF0YVRhYmxlMiIgbXNkYXRhOnJvd09yZGVyPSIxIiBk
        aWZmZ3I6aGFzQ2hhbmdlcz0iaW5zZXJ0ZWQiPjxYPjE8L1g+PFk+NTQ5PC9ZPjwvVGVlRGF0YVRhYmxl
        PjxUZWVEYXRhVGFibGUgZGlmZmdyOmlkPSJUZWVEYXRhVGFibGUzIiBtc2RhdGE6cm93T3JkZXI9IjIi
        IGRpZmZncjpoYXNDaGFuZ2VzPSJpbnNlcnRlZCI+PFg+MjwvWD48WT42MDY8L1k+PC9UZWVEYXRhVGFi
        bGU+PFRlZURhdGFUYWJsZSBkaWZmZ3I6aWQ9IlRlZURhdGFUYWJsZTQiIG1zZGF0YTpyb3dPcmRlcj0i
        MyIgZGlmZmdyOmhhc0NoYW5nZXM9Imluc2VydGVkIj48WD4zPC9YPjxZPjU1NjwvWT48L1RlZURhdGFU
        YWJsZT48VGVlRGF0YVRhYmxlIGRpZmZncjppZD0iVGVlRGF0YVRhYmxlNSIgbXNkYXRhOnJvd09yZGVy
        PSI0IiBkaWZmZ3I6aGFzQ2hhbmdlcz0iaW5zZXJ0ZWQiPjxYPjQ8L1g+PFk+Njc0PC9ZPjwvVGVlRGF0
        YVRhYmxlPjxUZWVEYXRhVGFibGUgZGlmZmdyOmlkPSJUZWVEYXRhVGFibGU2IiBtc2RhdGE6cm93T3Jk
        ZXI9IjUiIGRpZmZncjpoYXNDaGFuZ2VzPSJpbnNlcnRlZCI+PFg+NTwvWD48WT42NjA8L1k+PC9UZWVE
        YXRhVGFibGU+PFRlZURhdGFUYWJsZSBkaWZmZ3I6aWQ9IlRlZURhdGFUYWJsZTciIG1zZGF0YTpyb3dP
        cmRlcj0iNiIgZGlmZmdyOmhhc0NoYW5nZXM9Imluc2VydGVkIj48WD42PC9YPjxZPjc2MDwvWT48L1Rl
        ZURhdGFUYWJsZT48VGVlRGF0YVRhYmxlIGRpZmZncjppZD0iVGVlRGF0YVRhYmxlOCIgbXNkYXRhOnJv
        d09yZGVyPSI3IiBkaWZmZ3I6aGFzQ2hhbmdlcz0iaW5zZXJ0ZWQiPjxYPjc8L1g+PFk+ODc3PC9ZPjwv
        VGVlRGF0YVRhYmxlPjxUZWVEYXRhVGFibGUgZGlmZmdyOmlkPSJUZWVEYXRhVGFibGU5IiBtc2RhdGE6
        cm93T3JkZXI9IjgiIGRpZmZncjpoYXNDaGFuZ2VzPSJpbnNlcnRlZCI+PFg+ODwvWD48WT45NDU8L1k+
        PC9UZWVEYXRhVGFibGU+PFRlZURhdGFUYWJsZSBkaWZmZ3I6aWQ9IlRlZURhdGFUYWJsZTEwIiBtc2Rh
        dGE6cm93T3JkZXI9IjkiIGRpZmZncjpoYXNDaGFuZ2VzPSJpbnNlcnRlZCI+PFg+OTwvWD48WT4xMDQx
        PC9ZPjwvVGVlRGF0YVRhYmxlPjxUZWVEYXRhVGFibGUgZGlmZmdyOmlkPSJUZWVEYXRhVGFibGUxMSIg
        bXNkYXRhOnJvd09yZGVyPSIxMCIgZGlmZmdyOmhhc0NoYW5nZXM9Imluc2VydGVkIj48WD4xMDwvWD48
        WT45NzE8L1k+PC9UZWVEYXRhVGFibGU+PFRlZURhdGFUYWJsZSBkaWZmZ3I6aWQ9IlRlZURhdGFUYWJs
        ZTEyIiBtc2RhdGE6cm93T3JkZXI9IjExIiBkaWZmZ3I6aGFzQ2hhbmdlcz0iaW5zZXJ0ZWQiPjxYPjEx
        PC9YPjxZPjEwNDA8L1k+PC9UZWVEYXRhVGFibGU+PFRlZURhdGFUYWJsZSBkaWZmZ3I6aWQ9IlRlZURh
        dGFUYWJsZTEzIiBtc2RhdGE6cm93T3JkZXI9IjEyIiBkaWZmZ3I6aGFzQ2hhbmdlcz0iaW5zZXJ0ZWQi
        PjxYPjEyPC9YPjxZPjEwMzA8L1k+PC9UZWVEYXRhVGFibGU+PFRlZURhdGFUYWJsZSBkaWZmZ3I6aWQ9
        IlRlZURhdGFUYWJsZTE0IiBtc2RhdGE6cm93T3JkZXI9IjEzIiBkaWZmZ3I6aGFzQ2hhbmdlcz0iaW5z
        ZXJ0ZWQiPjxYPjEzPC9YPjxZPjk1ODwvWT48L1RlZURhdGFUYWJsZT48VGVlRGF0YVRhYmxlIGRpZmZn
        cjppZD0iVGVlRGF0YVRhYmxlMTUiIG1zZGF0YTpyb3dPcmRlcj0iMTQiIGRpZmZncjpoYXNDaGFuZ2Vz
        PSJpbnNlcnRlZCI+PFg+MTQ8L1g+PFk+ODk0PC9ZPjwvVGVlRGF0YVRhYmxlPjxUZWVEYXRhVGFibGUg
        ZGlmZmdyOmlkPSJUZWVEYXRhVGFibGUxNiIgbXNkYXRhOnJvd09yZGVyPSIxNSIgZGlmZmdyOmhhc0No
        YW5nZXM9Imluc2VydGVkIj48WD4xNTwvWD48WT43OTI8L1k+PC9UZWVEYXRhVGFibGU+PFRlZURhdGFU
        YWJsZSBkaWZmZ3I6aWQ9IlRlZURhdGFUYWJsZTE3IiBtc2RhdGE6cm93T3JkZXI9IjE2IiBkaWZmZ3I6
        aGFzQ2hhbmdlcz0iaW5zZXJ0ZWQiPjxYPjE2PC9YPjxZPjgwMzwvWT48L1RlZURhdGFUYWJsZT48VGVl
        RGF0YVRhYmxlIGRpZmZncjppZD0iVGVlRGF0YVRhYmxlMTgiIG1zZGF0YTpyb3dPcmRlcj0iMTciIGRp
        ZmZncjpoYXNDaGFuZ2VzPSJpbnNlcnRlZCI+PFg+MTc8L1g+PFk+OTE1PC9ZPjwvVGVlRGF0YVRhYmxl
        PjxUZWVEYXRhVGFibGUgZGlmZmdyOmlkPSJUZWVEYXRhVGFibGUxOSIgbXNkYXRhOnJvd09yZGVyPSIx
        OCIgZGlmZmdyOmhhc0NoYW5nZXM9Imluc2VydGVkIj48WD4xODwvWD48WT45Mjk8L1k+PC9UZWVEYXRh
        VGFibGU+PFRlZURhdGFUYWJsZSBkaWZmZ3I6aWQ9IlRlZURhdGFUYWJsZTIwIiBtc2RhdGE6cm93T3Jk
        ZXI9IjE5IiBkaWZmZ3I6aGFzQ2hhbmdlcz0iaW5zZXJ0ZWQiPjxYPjE5PC9YPjxZPjk1MTwvWT48L1Rl
        ZURhdGFUYWJsZT48VGVlRGF0YVRhYmxlIGRpZmZncjppZD0iVGVlRGF0YVRhYmxlMjEiIG1zZGF0YTpy
        b3dPcmRlcj0iMjAiIGRpZmZncjpoYXNDaGFuZ2VzPSJpbnNlcnRlZCI+PFg+MjA8L1g+PFk+OTQ4PC9Z
        PjwvVGVlRGF0YVRhYmxlPjxUZWVEYXRhVGFibGUgZGlmZmdyOmlkPSJUZWVEYXRhVGFibGUyMiIgbXNk
        YXRhOnJvd09yZGVyPSIyMSIgZGlmZmdyOmhhc0NoYW5nZXM9Imluc2VydGVkIj48WD4yMTwvWD48WT45
        OTE8L1k+PC9UZWVEYXRhVGFibGU+PFRlZURhdGFUYWJsZSBkaWZmZ3I6aWQ9IlRlZURhdGFUYWJsZTIz
        IiBtc2RhdGE6cm93T3JkZXI9IjIyIiBkaWZmZ3I6aGFzQ2hhbmdlcz0iaW5zZXJ0ZWQiPjxYPjIyPC9Y
        PjxZPjkwODwvWT48L1RlZURhdGFUYWJsZT48VGVlRGF0YVRhYmxlIGRpZmZncjppZD0iVGVlRGF0YVRh
        YmxlMjQiIG1zZGF0YTpyb3dPcmRlcj0iMjMiIGRpZmZncjpoYXNDaGFuZ2VzPSJpbnNlcnRlZCI+PFg+
        MjM8L1g+PFk+OTExPC9ZPjwvVGVlRGF0YVRhYmxlPjxUZWVEYXRhVGFibGUgZGlmZmdyOmlkPSJUZWVE
        YXRhVGFibGUyNSIgbXNkYXRhOnJvd09yZGVyPSIyNCIgZGlmZmdyOmhhc0NoYW5nZXM9Imluc2VydGVk
        Ij48WD4yNDwvWD48WT43ODg8L1k+PC9UZWVEYXRhVGFibGU+PC9UZWVEYXRhU2V0PjwvZGlmZmdyOmRp
        ZmZncmFtPgQDAAAADlN5c3RlbS5WZXJzaW9uBAAAAAZfTWFqb3IGX01pbm9yBl9CdWlsZAlfUmV2aXNp
        b24AAAAACAgICAIAAAAAAAAA//////////8L
</value>
  </data>
  <metadata name="line20.TrayLocation" type="System.Drawing.Point, System.Drawing, Version=4.0.0.0, Culture=neutral, PublicKeyToken=b03f5f7f11d50a3a">
    <value>112, 191</value>
  </metadata>
  <data name="line20.DataSource" mimetype="application/x-microsoft.net.object.binary.base64">
    <value>
        AAEAAAD/////AQAAAAAAAAAMAgAAAE5TeXN0ZW0uRGF0YSwgVmVyc2lvbj00LjAuMC4wLCBDdWx0dXJl
        PW5ldXRyYWwsIFB1YmxpY0tleVRva2VuPWI3N2E1YzU2MTkzNGUwODkFAQAAABNTeXN0ZW0uRGF0YS5E
        YXRhU2V0AwAAABdEYXRhU2V0LlJlbW90aW5nVmVyc2lvbglYbWxTY2hlbWELWG1sRGlmZkdyYW0DAQEO
        U3lzdGVtLlZlcnNpb24CAAAACQMAAAAGBAAAAI4GPD94bWwgdmVyc2lvbj0iMS4wIiBlbmNvZGluZz0i
        dXRmLTE2Ij8+DQo8eHM6c2NoZW1hIGlkPSJUZWVEYXRhU2V0IiB4bWxucz0iIiB4bWxuczp4cz0iaHR0
        cDovL3d3dy53My5vcmcvMjAwMS9YTUxTY2hlbWEiIHhtbG5zOm1zZGF0YT0idXJuOnNjaGVtYXMtbWlj
        cm9zb2Z0LWNvbTp4bWwtbXNkYXRhIj4NCiAgPHhzOmVsZW1lbnQgbmFtZT0iVGVlRGF0YVNldCIgbXNk
        YXRhOklzRGF0YVNldD0idHJ1ZSIgbXNkYXRhOlVzZUN1cnJlbnRMb2NhbGU9InRydWUiPg0KICAgIDx4
        czpjb21wbGV4VHlwZT4NCiAgICAgIDx4czpjaG9pY2UgbWluT2NjdXJzPSIwIiBtYXhPY2N1cnM9InVu
        Ym91bmRlZCI+DQogICAgICAgIDx4czplbGVtZW50IG5hbWU9IlRlZURhdGFUYWJsZSI+DQogICAgICAg
        ICAgPHhzOmNvbXBsZXhUeXBlPg0KICAgICAgICAgICAgPHhzOnNlcXVlbmNlPg0KICAgICAgICAgICAg
        ICA8eHM6ZWxlbWVudCBuYW1lPSJYIiB0eXBlPSJ4czpkb3VibGUiIG1zZGF0YTp0YXJnZXROYW1lc3Bh
        Y2U9IiIgbWluT2NjdXJzPSIwIiAvPg0KICAgICAgICAgICAgICA8eHM6ZWxlbWVudCBuYW1lPSJZIiB0
        eXBlPSJ4czpkb3VibGUiIG1zZGF0YTp0YXJnZXROYW1lc3BhY2U9IiIgbWluT2NjdXJzPSIwIiAvPg0K
        ICAgICAgICAgICAgPC94czpzZXF1ZW5jZT4NCiAgICAgICAgICA8L3hzOmNvbXBsZXhUeXBlPg0KICAg
        ICAgICA8L3hzOmVsZW1lbnQ+DQogICAgICA8L3hzOmNob2ljZT4NCiAgICA8L3hzOmNvbXBsZXhUeXBl
        Pg0KICA8L3hzOmVsZW1lbnQ+DQo8L3hzOnNjaGVtYT4GBQAAAMgZPGRpZmZncjpkaWZmZ3JhbSB4bWxu
        czptc2RhdGE9InVybjpzY2hlbWFzLW1pY3Jvc29mdC1jb206eG1sLW1zZGF0YSIgeG1sbnM6ZGlmZmdy
        PSJ1cm46c2NoZW1hcy1taWNyb3NvZnQtY29tOnhtbC1kaWZmZ3JhbS12MSI+PFRlZURhdGFTZXQ+PFRl
        ZURhdGFUYWJsZSBkaWZmZ3I6aWQ9IlRlZURhdGFUYWJsZTEiIG1zZGF0YTpyb3dPcmRlcj0iMCIgZGlm
        ZmdyOmhhc0NoYW5nZXM9Imluc2VydGVkIj48WD4wPC9YPjxZPjg5NzwvWT48L1RlZURhdGFUYWJsZT48
        VGVlRGF0YVRhYmxlIGRpZmZncjppZD0iVGVlRGF0YVRhYmxlMiIgbXNkYXRhOnJvd09yZGVyPSIxIiBk
        aWZmZ3I6aGFzQ2hhbmdlcz0iaW5zZXJ0ZWQiPjxYPjE8L1g+PFk+OTAxPC9ZPjwvVGVlRGF0YVRhYmxl
        PjxUZWVEYXRhVGFibGUgZGlmZmdyOmlkPSJUZWVEYXRhVGFibGUzIiBtc2RhdGE6cm93T3JkZXI9IjIi
        IGRpZmZncjpoYXNDaGFuZ2VzPSJpbnNlcnRlZCI+PFg+MjwvWD48WT45NTQ8L1k+PC9UZWVEYXRhVGFi
        bGU+PFRlZURhdGFUYWJsZSBkaWZmZ3I6aWQ9IlRlZURhdGFUYWJsZTQiIG1zZGF0YTpyb3dPcmRlcj0i
        MyIgZGlmZmdyOmhhc0NoYW5nZXM9Imluc2VydGVkIj48WD4zPC9YPjxZPjkyODwvWT48L1RlZURhdGFU
        YWJsZT48VGVlRGF0YVRhYmxlIGRpZmZncjppZD0iVGVlRGF0YVRhYmxlNSIgbXNkYXRhOnJvd09yZGVy
        PSI0IiBkaWZmZ3I6aGFzQ2hhbmdlcz0iaW5zZXJ0ZWQiPjxYPjQ8L1g+PFk+ODg2PC9ZPjwvVGVlRGF0
        YVRhYmxlPjxUZWVEYXRhVGFibGUgZGlmZmdyOmlkPSJUZWVEYXRhVGFibGU2IiBtc2RhdGE6cm93T3Jk
        ZXI9IjUiIGRpZmZncjpoYXNDaGFuZ2VzPSJpbnNlcnRlZCI+PFg+NTwvWD48WT45MjI8L1k+PC9UZWVE
        YXRhVGFibGU+PFRlZURhdGFUYWJsZSBkaWZmZ3I6aWQ9IlRlZURhdGFUYWJsZTciIG1zZGF0YTpyb3dP
        cmRlcj0iNiIgZGlmZmdyOmhhc0NoYW5nZXM9Imluc2VydGVkIj48WD42PC9YPjxZPjk3NjwvWT48L1Rl
        ZURhdGFUYWJsZT48VGVlRGF0YVRhYmxlIGRpZmZncjppZD0iVGVlRGF0YVRhYmxlOCIgbXNkYXRhOnJv
        d09yZGVyPSI3IiBkaWZmZ3I6aGFzQ2hhbmdlcz0iaW5zZXJ0ZWQiPjxYPjc8L1g+PFk+MTAwMzwvWT48
        L1RlZURhdGFUYWJsZT48VGVlRGF0YVRhYmxlIGRpZmZncjppZD0iVGVlRGF0YVRhYmxlOSIgbXNkYXRh
        OnJvd09yZGVyPSI4IiBkaWZmZ3I6aGFzQ2hhbmdlcz0iaW5zZXJ0ZWQiPjxYPjg8L1g+PFk+OTc4PC9Z
        PjwvVGVlRGF0YVRhYmxlPjxUZWVEYXRhVGFibGUgZGlmZmdyOmlkPSJUZWVEYXRhVGFibGUxMCIgbXNk
        YXRhOnJvd09yZGVyPSI5IiBkaWZmZ3I6aGFzQ2hhbmdlcz0iaW5zZXJ0ZWQiPjxYPjk8L1g+PFk+OTU5
        PC9ZPjwvVGVlRGF0YVRhYmxlPjxUZWVEYXRhVGFibGUgZGlmZmdyOmlkPSJUZWVEYXRhVGFibGUxMSIg
        bXNkYXRhOnJvd09yZGVyPSIxMCIgZGlmZmdyOmhhc0NoYW5nZXM9Imluc2VydGVkIj48WD4xMDwvWD48
        WT45NzQ8L1k+PC9UZWVEYXRhVGFibGU+PFRlZURhdGFUYWJsZSBkaWZmZ3I6aWQ9IlRlZURhdGFUYWJs
        ZTEyIiBtc2RhdGE6cm93T3JkZXI9IjExIiBkaWZmZ3I6aGFzQ2hhbmdlcz0iaW5zZXJ0ZWQiPjxYPjEx
        PC9YPjxZPjk1MTwvWT48L1RlZURhdGFUYWJsZT48VGVlRGF0YVRhYmxlIGRpZmZncjppZD0iVGVlRGF0
        YVRhYmxlMTMiIG1zZGF0YTpyb3dPcmRlcj0iMTIiIGRpZmZncjpoYXNDaGFuZ2VzPSJpbnNlcnRlZCI+
        PFg+MTI8L1g+PFk+OTc1PC9ZPjwvVGVlRGF0YVRhYmxlPjxUZWVEYXRhVGFibGUgZGlmZmdyOmlkPSJU
        ZWVEYXRhVGFibGUxNCIgbXNkYXRhOnJvd09yZGVyPSIxMyIgZGlmZmdyOmhhc0NoYW5nZXM9Imluc2Vy
        dGVkIj48WD4xMzwvWD48WT4xMDA1PC9ZPjwvVGVlRGF0YVRhYmxlPjxUZWVEYXRhVGFibGUgZGlmZmdy
        OmlkPSJUZWVEYXRhVGFibGUxNSIgbXNkYXRhOnJvd09yZGVyPSIxNCIgZGlmZmdyOmhhc0NoYW5nZXM9
        Imluc2VydGVkIj48WD4xNDwvWD48WT45NTc8L1k+PC9UZWVEYXRhVGFibGU+PFRlZURhdGFUYWJsZSBk
        aWZmZ3I6aWQ9IlRlZURhdGFUYWJsZTE2IiBtc2RhdGE6cm93T3JkZXI9IjE1IiBkaWZmZ3I6aGFzQ2hh
        bmdlcz0iaW5zZXJ0ZWQiPjxYPjE1PC9YPjxZPjk4NDwvWT48L1RlZURhdGFUYWJsZT48VGVlRGF0YVRh
        YmxlIGRpZmZncjppZD0iVGVlRGF0YVRhYmxlMTciIG1zZGF0YTpyb3dPcmRlcj0iMTYiIGRpZmZncjpo
        YXNDaGFuZ2VzPSJpbnNlcnRlZCI+PFg+MTY8L1g+PFk+MTAxODwvWT48L1RlZURhdGFUYWJsZT48VGVl
        RGF0YVRhYmxlIGRpZmZncjppZD0iVGVlRGF0YVRhYmxlMTgiIG1zZGF0YTpyb3dPcmRlcj0iMTciIGRp
        ZmZncjpoYXNDaGFuZ2VzPSJpbnNlcnRlZCI+PFg+MTc8L1g+PFk+MTA1NzwvWT48L1RlZURhdGFUYWJs
        ZT48VGVlRGF0YVRhYmxlIGRpZmZncjppZD0iVGVlRGF0YVRhYmxlMTkiIG1zZGF0YTpyb3dPcmRlcj0i
        MTgiIGRpZmZncjpoYXNDaGFuZ2VzPSJpbnNlcnRlZCI+PFg+MTg8L1g+PFk+MTAyMzwvWT48L1RlZURh
        dGFUYWJsZT48VGVlRGF0YVRhYmxlIGRpZmZncjppZD0iVGVlRGF0YVRhYmxlMjAiIG1zZGF0YTpyb3dP
        cmRlcj0iMTkiIGRpZmZncjpoYXNDaGFuZ2VzPSJpbnNlcnRlZCI+PFg+MTk8L1g+PFk+MTAzNDwvWT48
        L1RlZURhdGFUYWJsZT48VGVlRGF0YVRhYmxlIGRpZmZncjppZD0iVGVlRGF0YVRhYmxlMjEiIG1zZGF0
        YTpyb3dPcmRlcj0iMjAiIGRpZmZncjpoYXNDaGFuZ2VzPSJpbnNlcnRlZCI+PFg+MjA8L1g+PFk+OTkx
        PC9ZPjwvVGVlRGF0YVRhYmxlPjxUZWVEYXRhVGFibGUgZGlmZmdyOmlkPSJUZWVEYXRhVGFibGUyMiIg
        bXNkYXRhOnJvd09yZGVyPSIyMSIgZGlmZmdyOmhhc0NoYW5nZXM9Imluc2VydGVkIj48WD4yMTwvWD48
        WT45ODk8L1k+PC9UZWVEYXRhVGFibGU+PFRlZURhdGFUYWJsZSBkaWZmZ3I6aWQ9IlRlZURhdGFUYWJs
        ZTIzIiBtc2RhdGE6cm93T3JkZXI9IjIyIiBkaWZmZ3I6aGFzQ2hhbmdlcz0iaW5zZXJ0ZWQiPjxYPjIy
        PC9YPjxZPjEwMjE8L1k+PC9UZWVEYXRhVGFibGU+PFRlZURhdGFUYWJsZSBkaWZmZ3I6aWQ9IlRlZURh
        dGFUYWJsZTI0IiBtc2RhdGE6cm93T3JkZXI9IjIzIiBkaWZmZ3I6aGFzQ2hhbmdlcz0iaW5zZXJ0ZWQi
        PjxYPjIzPC9YPjxZPjk2MjwvWT48L1RlZURhdGFUYWJsZT48VGVlRGF0YVRhYmxlIGRpZmZncjppZD0i
        VGVlRGF0YVRhYmxlMjUiIG1zZGF0YTpyb3dPcmRlcj0iMjQiIGRpZmZncjpoYXNDaGFuZ2VzPSJpbnNl
        cnRlZCI+PFg+MjQ8L1g+PFk+OTQxPC9ZPjwvVGVlRGF0YVRhYmxlPjwvVGVlRGF0YVNldD48L2RpZmZn
        cjpkaWZmZ3JhbT4EAwAAAA5TeXN0ZW0uVmVyc2lvbgQAAAAGX01ham9yBl9NaW5vcgZfQnVpbGQJX1Jl
        dmlzaW9uAAAAAAgICAgCAAAAAAAAAP//////////Cw==
</value>
  </data>
  <metadata name="line16.TrayLocation" type="System.Drawing.Point, System.Drawing, Version=4.0.0.0, Culture=neutral, PublicKeyToken=b03f5f7f11d50a3a">
    <value>291, 146</value>
  </metadata>
  <data name="line16.DataSource" mimetype="application/x-microsoft.net.object.binary.base64">
    <value>
        AAEAAAD/////AQAAAAAAAAAMAgAAAE5TeXN0ZW0uRGF0YSwgVmVyc2lvbj00LjAuMC4wLCBDdWx0dXJl
        PW5ldXRyYWwsIFB1YmxpY0tleVRva2VuPWI3N2E1YzU2MTkzNGUwODkFAQAAABNTeXN0ZW0uRGF0YS5E
        YXRhU2V0AwAAABdEYXRhU2V0LlJlbW90aW5nVmVyc2lvbglYbWxTY2hlbWELWG1sRGlmZkdyYW0DAQEO
        U3lzdGVtLlZlcnNpb24CAAAACQMAAAAGBAAAAI4GPD94bWwgdmVyc2lvbj0iMS4wIiBlbmNvZGluZz0i
        dXRmLTE2Ij8+DQo8eHM6c2NoZW1hIGlkPSJUZWVEYXRhU2V0IiB4bWxucz0iIiB4bWxuczp4cz0iaHR0
        cDovL3d3dy53My5vcmcvMjAwMS9YTUxTY2hlbWEiIHhtbG5zOm1zZGF0YT0idXJuOnNjaGVtYXMtbWlj
        cm9zb2Z0LWNvbTp4bWwtbXNkYXRhIj4NCiAgPHhzOmVsZW1lbnQgbmFtZT0iVGVlRGF0YVNldCIgbXNk
        YXRhOklzRGF0YVNldD0idHJ1ZSIgbXNkYXRhOlVzZUN1cnJlbnRMb2NhbGU9InRydWUiPg0KICAgIDx4
        czpjb21wbGV4VHlwZT4NCiAgICAgIDx4czpjaG9pY2UgbWluT2NjdXJzPSIwIiBtYXhPY2N1cnM9InVu
        Ym91bmRlZCI+DQogICAgICAgIDx4czplbGVtZW50IG5hbWU9IlRlZURhdGFUYWJsZSI+DQogICAgICAg
        ICAgPHhzOmNvbXBsZXhUeXBlPg0KICAgICAgICAgICAgPHhzOnNlcXVlbmNlPg0KICAgICAgICAgICAg
        ICA8eHM6ZWxlbWVudCBuYW1lPSJYIiB0eXBlPSJ4czpkb3VibGUiIG1zZGF0YTp0YXJnZXROYW1lc3Bh
        Y2U9IiIgbWluT2NjdXJzPSIwIiAvPg0KICAgICAgICAgICAgICA8eHM6ZWxlbWVudCBuYW1lPSJZIiB0
        eXBlPSJ4czpkb3VibGUiIG1zZGF0YTp0YXJnZXROYW1lc3BhY2U9IiIgbWluT2NjdXJzPSIwIiAvPg0K
        ICAgICAgICAgICAgPC94czpzZXF1ZW5jZT4NCiAgICAgICAgICA8L3hzOmNvbXBsZXhUeXBlPg0KICAg
        ICAgICA8L3hzOmVsZW1lbnQ+DQogICAgICA8L3hzOmNob2ljZT4NCiAgICA8L3hzOmNvbXBsZXhUeXBl
        Pg0KICA8L3hzOmVsZW1lbnQ+DQo8L3hzOnNjaGVtYT4GBQAAAMAZPGRpZmZncjpkaWZmZ3JhbSB4bWxu
        czptc2RhdGE9InVybjpzY2hlbWFzLW1pY3Jvc29mdC1jb206eG1sLW1zZGF0YSIgeG1sbnM6ZGlmZmdy
        PSJ1cm46c2NoZW1hcy1taWNyb3NvZnQtY29tOnhtbC1kaWZmZ3JhbS12MSI+PFRlZURhdGFTZXQ+PFRl
        ZURhdGFUYWJsZSBkaWZmZ3I6aWQ9IlRlZURhdGFUYWJsZTEiIG1zZGF0YTpyb3dPcmRlcj0iMCIgZGlm
        ZmdyOmhhc0NoYW5nZXM9Imluc2VydGVkIj48WD4wPC9YPjxZPjU1PC9ZPjwvVGVlRGF0YVRhYmxlPjxU
        ZWVEYXRhVGFibGUgZGlmZmdyOmlkPSJUZWVEYXRhVGFibGUyIiBtc2RhdGE6cm93T3JkZXI9IjEiIGRp
        ZmZncjpoYXNDaGFuZ2VzPSJpbnNlcnRlZCI+PFg+MTwvWD48WT45NDwvWT48L1RlZURhdGFUYWJsZT48
        VGVlRGF0YVRhYmxlIGRpZmZncjppZD0iVGVlRGF0YVRhYmxlMyIgbXNkYXRhOnJvd09yZGVyPSIyIiBk
        aWZmZ3I6aGFzQ2hhbmdlcz0iaW5zZXJ0ZWQiPjxYPjI8L1g+PFk+MTQ1PC9ZPjwvVGVlRGF0YVRhYmxl
        PjxUZWVEYXRhVGFibGUgZGlmZmdyOmlkPSJUZWVEYXRhVGFibGU0IiBtc2RhdGE6cm93T3JkZXI9IjMi
        IGRpZmZncjpoYXNDaGFuZ2VzPSJpbnNlcnRlZCI+PFg+MzwvWD48WT4yNjA8L1k+PC9UZWVEYXRhVGFi
        bGU+PFRlZURhdGFUYWJsZSBkaWZmZ3I6aWQ9IlRlZURhdGFUYWJsZTUiIG1zZGF0YTpyb3dPcmRlcj0i
        NCIgZGlmZmdyOmhhc0NoYW5nZXM9Imluc2VydGVkIj48WD40PC9YPjxZPjI5MDwvWT48L1RlZURhdGFU
        YWJsZT48VGVlRGF0YVRhYmxlIGRpZmZncjppZD0iVGVlRGF0YVRhYmxlNiIgbXNkYXRhOnJvd09yZGVy
        PSI1IiBkaWZmZ3I6aGFzQ2hhbmdlcz0iaW5zZXJ0ZWQiPjxYPjU8L1g+PFk+MjE4PC9ZPjwvVGVlRGF0
        YVRhYmxlPjxUZWVEYXRhVGFibGUgZGlmZmdyOmlkPSJUZWVEYXRhVGFibGU3IiBtc2RhdGE6cm93T3Jk
        ZXI9IjYiIGRpZmZncjpoYXNDaGFuZ2VzPSJpbnNlcnRlZCI+PFg+NjwvWD48WT4xMzQ8L1k+PC9UZWVE
        YXRhVGFibGU+PFRlZURhdGFUYWJsZSBkaWZmZ3I6aWQ9IlRlZURhdGFUYWJsZTgiIG1zZGF0YTpyb3dP
        cmRlcj0iNyIgZGlmZmdyOmhhc0NoYW5nZXM9Imluc2VydGVkIj48WD43PC9YPjxZPjIxNjwvWT48L1Rl
        ZURhdGFUYWJsZT48VGVlRGF0YVRhYmxlIGRpZmZncjppZD0iVGVlRGF0YVRhYmxlOSIgbXNkYXRhOnJv
        d09yZGVyPSI4IiBkaWZmZ3I6aGFzQ2hhbmdlcz0iaW5zZXJ0ZWQiPjxYPjg8L1g+PFk+MzM3PC9ZPjwv
        VGVlRGF0YVRhYmxlPjxUZWVEYXRhVGFibGUgZGlmZmdyOmlkPSJUZWVEYXRhVGFibGUxMCIgbXNkYXRh
        OnJvd09yZGVyPSI5IiBkaWZmZ3I6aGFzQ2hhbmdlcz0iaW5zZXJ0ZWQiPjxYPjk8L1g+PFk+NDIwPC9Z
        PjwvVGVlRGF0YVRhYmxlPjxUZWVEYXRhVGFibGUgZGlmZmdyOmlkPSJUZWVEYXRhVGFibGUxMSIgbXNk
        YXRhOnJvd09yZGVyPSIxMCIgZGlmZmdyOmhhc0NoYW5nZXM9Imluc2VydGVkIj48WD4xMDwvWD48WT4z
        MDA8L1k+PC9UZWVEYXRhVGFibGU+PFRlZURhdGFUYWJsZSBkaWZmZ3I6aWQ9IlRlZURhdGFUYWJsZTEy
        IiBtc2RhdGE6cm93T3JkZXI9IjExIiBkaWZmZ3I6aGFzQ2hhbmdlcz0iaW5zZXJ0ZWQiPjxYPjExPC9Y
        PjxZPjQxODwvWT48L1RlZURhdGFUYWJsZT48VGVlRGF0YVRhYmxlIGRpZmZncjppZD0iVGVlRGF0YVRh
        YmxlMTMiIG1zZGF0YTpyb3dPcmRlcj0iMTIiIGRpZmZncjpoYXNDaGFuZ2VzPSJpbnNlcnRlZCI+PFg+
        MTI8L1g+PFk+NTMzPC9ZPjwvVGVlRGF0YVRhYmxlPjxUZWVEYXRhVGFibGUgZGlmZmdyOmlkPSJUZWVE
        YXRhVGFibGUxNCIgbXNkYXRhOnJvd09yZGVyPSIxMyIgZGlmZmdyOmhhc0NoYW5nZXM9Imluc2VydGVk
        Ij48WD4xMzwvWD48WT41NDA8L1k+PC9UZWVEYXRhVGFibGU+PFRlZURhdGFUYWJsZSBkaWZmZ3I6aWQ9
        IlRlZURhdGFUYWJsZTE1IiBtc2RhdGE6cm93T3JkZXI9IjE0IiBkaWZmZ3I6aGFzQ2hhbmdlcz0iaW5z
        ZXJ0ZWQiPjxYPjE0PC9YPjxZPjUxMzwvWT48L1RlZURhdGFUYWJsZT48VGVlRGF0YVRhYmxlIGRpZmZn
        cjppZD0iVGVlRGF0YVRhYmxlMTYiIG1zZGF0YTpyb3dPcmRlcj0iMTUiIGRpZmZncjpoYXNDaGFuZ2Vz
        PSJpbnNlcnRlZCI+PFg+MTU8L1g+PFk+NDU1PC9ZPjwvVGVlRGF0YVRhYmxlPjxUZWVEYXRhVGFibGUg
        ZGlmZmdyOmlkPSJUZWVEYXRhVGFibGUxNyIgbXNkYXRhOnJvd09yZGVyPSIxNiIgZGlmZmdyOmhhc0No
        YW5nZXM9Imluc2VydGVkIj48WD4xNjwvWD48WT41NTU8L1k+PC9UZWVEYXRhVGFibGU+PFRlZURhdGFU
        YWJsZSBkaWZmZ3I6aWQ9IlRlZURhdGFUYWJsZTE4IiBtc2RhdGE6cm93T3JkZXI9IjE3IiBkaWZmZ3I6
        aGFzQ2hhbmdlcz0iaW5zZXJ0ZWQiPjxYPjE3PC9YPjxZPjYzNDwvWT48L1RlZURhdGFUYWJsZT48VGVl
        RGF0YVRhYmxlIGRpZmZncjppZD0iVGVlRGF0YVRhYmxlMTkiIG1zZGF0YTpyb3dPcmRlcj0iMTgiIGRp
        ZmZncjpoYXNDaGFuZ2VzPSJpbnNlcnRlZCI+PFg+MTg8L1g+PFk+NzQ4PC9ZPjwvVGVlRGF0YVRhYmxl
        PjxUZWVEYXRhVGFibGUgZGlmZmdyOmlkPSJUZWVEYXRhVGFibGUyMCIgbXNkYXRhOnJvd09yZGVyPSIx
        OSIgZGlmZmdyOmhhc0NoYW5nZXM9Imluc2VydGVkIj48WD4xOTwvWD48WT43Mjc8L1k+PC9UZWVEYXRh
        VGFibGU+PFRlZURhdGFUYWJsZSBkaWZmZ3I6aWQ9IlRlZURhdGFUYWJsZTIxIiBtc2RhdGE6cm93T3Jk
        ZXI9IjIwIiBkaWZmZ3I6aGFzQ2hhbmdlcz0iaW5zZXJ0ZWQiPjxYPjIwPC9YPjxZPjgxMDwvWT48L1Rl
        ZURhdGFUYWJsZT48VGVlRGF0YVRhYmxlIGRpZmZncjppZD0iVGVlRGF0YVRhYmxlMjIiIG1zZGF0YTpy
        b3dPcmRlcj0iMjEiIGRpZmZncjpoYXNDaGFuZ2VzPSJpbnNlcnRlZCI+PFg+MjE8L1g+PFk+Nzg3PC9Z
        PjwvVGVlRGF0YVRhYmxlPjxUZWVEYXRhVGFibGUgZGlmZmdyOmlkPSJUZWVEYXRhVGFibGUyMyIgbXNk
        YXRhOnJvd09yZGVyPSIyMiIgZGlmZmdyOmhhc0NoYW5nZXM9Imluc2VydGVkIj48WD4yMjwvWD48WT44
        NDg8L1k+PC9UZWVEYXRhVGFibGU+PFRlZURhdGFUYWJsZSBkaWZmZ3I6aWQ9IlRlZURhdGFUYWJsZTI0
        IiBtc2RhdGE6cm93T3JkZXI9IjIzIiBkaWZmZ3I6aGFzQ2hhbmdlcz0iaW5zZXJ0ZWQiPjxYPjIzPC9Y
        PjxZPjkxNDwvWT48L1RlZURhdGFUYWJsZT48VGVlRGF0YVRhYmxlIGRpZmZncjppZD0iVGVlRGF0YVRh
        YmxlMjUiIG1zZGF0YTpyb3dPcmRlcj0iMjQiIGRpZmZncjpoYXNDaGFuZ2VzPSJpbnNlcnRlZCI+PFg+
        MjQ8L1g+PFk+MTAyNjwvWT48L1RlZURhdGFUYWJsZT48L1RlZURhdGFTZXQ+PC9kaWZmZ3I6ZGlmZmdy
        YW0+BAMAAAAOU3lzdGVtLlZlcnNpb24EAAAABl9NYWpvcgZfTWlub3IGX0J1aWxkCV9SZXZpc2lvbgAA
        AAAICAgIAgAAAAAAAAD//////////ws=
</value>
  </data>
  <metadata name="line1.TrayLocation" type="System.Drawing.Point, System.Drawing, Version=4.0.0.0, Culture=neutral, PublicKeyToken=b03f5f7f11d50a3a">
    <value>492, 191</value>
  </metadata>
  <data name="line1.DataSource" mimetype="application/x-microsoft.net.object.binary.base64">
    <value>
        AAEAAAD/////AQAAAAAAAAAMAgAAAE5TeXN0ZW0uRGF0YSwgVmVyc2lvbj00LjAuMC4wLCBDdWx0dXJl
        PW5ldXRyYWwsIFB1YmxpY0tleVRva2VuPWI3N2E1YzU2MTkzNGUwODkFAQAAABNTeXN0ZW0uRGF0YS5E
        YXRhU2V0AwAAABdEYXRhU2V0LlJlbW90aW5nVmVyc2lvbglYbWxTY2hlbWELWG1sRGlmZkdyYW0DAQEO
        U3lzdGVtLlZlcnNpb24CAAAACQMAAAAGBAAAAI4GPD94bWwgdmVyc2lvbj0iMS4wIiBlbmNvZGluZz0i
        dXRmLTE2Ij8+DQo8eHM6c2NoZW1hIGlkPSJUZWVEYXRhU2V0IiB4bWxucz0iIiB4bWxuczp4cz0iaHR0
        cDovL3d3dy53My5vcmcvMjAwMS9YTUxTY2hlbWEiIHhtbG5zOm1zZGF0YT0idXJuOnNjaGVtYXMtbWlj
        cm9zb2Z0LWNvbTp4bWwtbXNkYXRhIj4NCiAgPHhzOmVsZW1lbnQgbmFtZT0iVGVlRGF0YVNldCIgbXNk
        YXRhOklzRGF0YVNldD0idHJ1ZSIgbXNkYXRhOlVzZUN1cnJlbnRMb2NhbGU9InRydWUiPg0KICAgIDx4
        czpjb21wbGV4VHlwZT4NCiAgICAgIDx4czpjaG9pY2UgbWluT2NjdXJzPSIwIiBtYXhPY2N1cnM9InVu
        Ym91bmRlZCI+DQogICAgICAgIDx4czplbGVtZW50IG5hbWU9IlRlZURhdGFUYWJsZSI+DQogICAgICAg
        ICAgPHhzOmNvbXBsZXhUeXBlPg0KICAgICAgICAgICAgPHhzOnNlcXVlbmNlPg0KICAgICAgICAgICAg
        ICA8eHM6ZWxlbWVudCBuYW1lPSJYIiB0eXBlPSJ4czpkb3VibGUiIG1zZGF0YTp0YXJnZXROYW1lc3Bh
        Y2U9IiIgbWluT2NjdXJzPSIwIiAvPg0KICAgICAgICAgICAgICA8eHM6ZWxlbWVudCBuYW1lPSJZIiB0
        eXBlPSJ4czpkb3VibGUiIG1zZGF0YTp0YXJnZXROYW1lc3BhY2U9IiIgbWluT2NjdXJzPSIwIiAvPg0K
        ICAgICAgICAgICAgPC94czpzZXF1ZW5jZT4NCiAgICAgICAgICA8L3hzOmNvbXBsZXhUeXBlPg0KICAg
        ICAgICA8L3hzOmVsZW1lbnQ+DQogICAgICA8L3hzOmNob2ljZT4NCiAgICA8L3hzOmNvbXBsZXhUeXBl
        Pg0KICA8L3hzOmVsZW1lbnQ+DQo8L3hzOnNjaGVtYT4GBQAAANQZPGRpZmZncjpkaWZmZ3JhbSB4bWxu
        czptc2RhdGE9InVybjpzY2hlbWFzLW1pY3Jvc29mdC1jb206eG1sLW1zZGF0YSIgeG1sbnM6ZGlmZmdy
        PSJ1cm46c2NoZW1hcy1taWNyb3NvZnQtY29tOnhtbC1kaWZmZ3JhbS12MSI+PFRlZURhdGFTZXQ+PFRl
        ZURhdGFUYWJsZSBkaWZmZ3I6aWQ9IlRlZURhdGFUYWJsZTEiIG1zZGF0YTpyb3dPcmRlcj0iMCIgZGlm
        ZmdyOmhhc0NoYW5nZXM9Imluc2VydGVkIj48WD4wPC9YPjxZPjkwMDwvWT48L1RlZURhdGFUYWJsZT48
        VGVlRGF0YVRhYmxlIGRpZmZncjppZD0iVGVlRGF0YVRhYmxlMiIgbXNkYXRhOnJvd09yZGVyPSIxIiBk
        aWZmZ3I6aGFzQ2hhbmdlcz0iaW5zZXJ0ZWQiPjxYPjE8L1g+PFk+OTU5PC9ZPjwvVGVlRGF0YVRhYmxl
        PjxUZWVEYXRhVGFibGUgZGlmZmdyOmlkPSJUZWVEYXRhVGFibGUzIiBtc2RhdGE6cm93T3JkZXI9IjIi
        IGRpZmZncjpoYXNDaGFuZ2VzPSJpbnNlcnRlZCI+PFg+MjwvWD48WT44NDY8L1k+PC9UZWVEYXRhVGFi
        bGU+PFRlZURhdGFUYWJsZSBkaWZmZ3I6aWQ9IlRlZURhdGFUYWJsZTQiIG1zZGF0YTpyb3dPcmRlcj0i
        MyIgZGlmZmdyOmhhc0NoYW5nZXM9Imluc2VydGVkIj48WD4zPC9YPjxZPjk2MjwvWT48L1RlZURhdGFU
        YWJsZT48VGVlRGF0YVRhYmxlIGRpZmZncjppZD0iVGVlRGF0YVRhYmxlNSIgbXNkYXRhOnJvd09yZGVy
        PSI0IiBkaWZmZ3I6aGFzQ2hhbmdlcz0iaW5zZXJ0ZWQiPjxYPjQ8L1g+PFk+OTc1PC9ZPjwvVGVlRGF0
        YVRhYmxlPjxUZWVEYXRhVGFibGUgZGlmZmdyOmlkPSJUZWVEYXRhVGFibGU2IiBtc2RhdGE6cm93T3Jk
        ZXI9IjUiIGRpZmZncjpoYXNDaGFuZ2VzPSJpbnNlcnRlZCI+PFg+NTwvWD48WT45ODE8L1k+PC9UZWVE
        YXRhVGFibGU+PFRlZURhdGFUYWJsZSBkaWZmZ3I6aWQ9IlRlZURhdGFUYWJsZTciIG1zZGF0YTpyb3dP
        cmRlcj0iNiIgZGlmZmdyOmhhc0NoYW5nZXM9Imluc2VydGVkIj48WD42PC9YPjxZPjEwNzU8L1k+PC9U
        ZWVEYXRhVGFibGU+PFRlZURhdGFUYWJsZSBkaWZmZ3I6aWQ9IlRlZURhdGFUYWJsZTgiIG1zZGF0YTpy
        b3dPcmRlcj0iNyIgZGlmZmdyOmhhc0NoYW5nZXM9Imluc2VydGVkIj48WD43PC9YPjxZPjExNDI8L1k+
        PC9UZWVEYXRhVGFibGU+PFRlZURhdGFUYWJsZSBkaWZmZ3I6aWQ9IlRlZURhdGFUYWJsZTkiIG1zZGF0
        YTpyb3dPcmRlcj0iOCIgZGlmZmdyOmhhc0NoYW5nZXM9Imluc2VydGVkIj48WD44PC9YPjxZPjEyNjU8
        L1k+PC9UZWVEYXRhVGFibGU+PFRlZURhdGFUYWJsZSBkaWZmZ3I6aWQ9IlRlZURhdGFUYWJsZTEwIiBt
        c2RhdGE6cm93T3JkZXI9IjkiIGRpZmZncjpoYXNDaGFuZ2VzPSJpbnNlcnRlZCI+PFg+OTwvWD48WT4x
        MzI1PC9ZPjwvVGVlRGF0YVRhYmxlPjxUZWVEYXRhVGFibGUgZGlmZmdyOmlkPSJUZWVEYXRhVGFibGUx
        MSIgbXNkYXRhOnJvd09yZGVyPSIxMCIgZGlmZmdyOmhhc0NoYW5nZXM9Imluc2VydGVkIj48WD4xMDwv
        WD48WT4xMzc5PC9ZPjwvVGVlRGF0YVRhYmxlPjxUZWVEYXRhVGFibGUgZGlmZmdyOmlkPSJUZWVEYXRh
        VGFibGUxMiIgbXNkYXRhOnJvd09yZGVyPSIxMSIgZGlmZmdyOmhhc0NoYW5nZXM9Imluc2VydGVkIj48
        WD4xMTwvWD48WT4xNDcwPC9ZPjwvVGVlRGF0YVRhYmxlPjxUZWVEYXRhVGFibGUgZGlmZmdyOmlkPSJU
        ZWVEYXRhVGFibGUxMyIgbXNkYXRhOnJvd09yZGVyPSIxMiIgZGlmZmdyOmhhc0NoYW5nZXM9Imluc2Vy
        dGVkIj48WD4xMjwvWD48WT4xNTA4PC9ZPjwvVGVlRGF0YVRhYmxlPjxUZWVEYXRhVGFibGUgZGlmZmdy
        OmlkPSJUZWVEYXRhVGFibGUxNCIgbXNkYXRhOnJvd09yZGVyPSIxMyIgZGlmZmdyOmhhc0NoYW5nZXM9
        Imluc2VydGVkIj48WD4xMzwvWD48WT4xNTczPC9ZPjwvVGVlRGF0YVRhYmxlPjxUZWVEYXRhVGFibGUg
        ZGlmZmdyOmlkPSJUZWVEYXRhVGFibGUxNSIgbXNkYXRhOnJvd09yZGVyPSIxNCIgZGlmZmdyOmhhc0No
        YW5nZXM9Imluc2VydGVkIj48WD4xNDwvWD48WT4xNjg1PC9ZPjwvVGVlRGF0YVRhYmxlPjxUZWVEYXRh
        VGFibGUgZGlmZmdyOmlkPSJUZWVEYXRhVGFibGUxNiIgbXNkYXRhOnJvd09yZGVyPSIxNSIgZGlmZmdy
        Omhhc0NoYW5nZXM9Imluc2VydGVkIj48WD4xNTwvWD48WT4xNTcxPC9ZPjwvVGVlRGF0YVRhYmxlPjxU
        ZWVEYXRhVGFibGUgZGlmZmdyOmlkPSJUZWVEYXRhVGFibGUxNyIgbXNkYXRhOnJvd09yZGVyPSIxNiIg
        ZGlmZmdyOmhhc0NoYW5nZXM9Imluc2VydGVkIj48WD4xNjwvWD48WT4xNTE0PC9ZPjwvVGVlRGF0YVRh
        YmxlPjxUZWVEYXRhVGFibGUgZGlmZmdyOmlkPSJUZWVEYXRhVGFibGUxOCIgbXNkYXRhOnJvd09yZGVy
        PSIxNyIgZGlmZmdyOmhhc0NoYW5nZXM9Imluc2VydGVkIj48WD4xNzwvWD48WT4xNTY4PC9ZPjwvVGVl
        RGF0YVRhYmxlPjxUZWVEYXRhVGFibGUgZGlmZmdyOmlkPSJUZWVEYXRhVGFibGUxOSIgbXNkYXRhOnJv
        d09yZGVyPSIxOCIgZGlmZmdyOmhhc0NoYW5nZXM9Imluc2VydGVkIj48WD4xODwvWD48WT4xNTg3PC9Z
        PjwvVGVlRGF0YVRhYmxlPjxUZWVEYXRhVGFibGUgZGlmZmdyOmlkPSJUZWVEYXRhVGFibGUyMCIgbXNk
        YXRhOnJvd09yZGVyPSIxOSIgZGlmZmdyOmhhc0NoYW5nZXM9Imluc2VydGVkIj48WD4xOTwvWD48WT4x
        NTYyPC9ZPjwvVGVlRGF0YVRhYmxlPjxUZWVEYXRhVGFibGUgZGlmZmdyOmlkPSJUZWVEYXRhVGFibGUy
        MSIgbXNkYXRhOnJvd09yZGVyPSIyMCIgZGlmZmdyOmhhc0NoYW5nZXM9Imluc2VydGVkIj48WD4yMDwv
        WD48WT4xNTQ4PC9ZPjwvVGVlRGF0YVRhYmxlPjxUZWVEYXRhVGFibGUgZGlmZmdyOmlkPSJUZWVEYXRh
        VGFibGUyMiIgbXNkYXRhOnJvd09yZGVyPSIyMSIgZGlmZmdyOmhhc0NoYW5nZXM9Imluc2VydGVkIj48
        WD4yMTwvWD48WT4xNjY4PC9ZPjwvVGVlRGF0YVRhYmxlPjxUZWVEYXRhVGFibGUgZGlmZmdyOmlkPSJU
        ZWVEYXRhVGFibGUyMyIgbXNkYXRhOnJvd09yZGVyPSIyMiIgZGlmZmdyOmhhc0NoYW5nZXM9Imluc2Vy
        dGVkIj48WD4yMjwvWD48WT4xNjIwPC9ZPjwvVGVlRGF0YVRhYmxlPjxUZWVEYXRhVGFibGUgZGlmZmdy
        OmlkPSJUZWVEYXRhVGFibGUyNCIgbXNkYXRhOnJvd09yZGVyPSIyMyIgZGlmZmdyOmhhc0NoYW5nZXM9
        Imluc2VydGVkIj48WD4yMzwvWD48WT4xNjUxPC9ZPjwvVGVlRGF0YVRhYmxlPjxUZWVEYXRhVGFibGUg
        ZGlmZmdyOmlkPSJUZWVEYXRhVGFibGUyNSIgbXNkYXRhOnJvd09yZGVyPSIyNCIgZGlmZmdyOmhhc0No
        YW5nZXM9Imluc2VydGVkIj48WD4yNDwvWD48WT4xNjE2PC9ZPjwvVGVlRGF0YVRhYmxlPjwvVGVlRGF0
        YVNldD48L2RpZmZncjpkaWZmZ3JhbT4EAwAAAA5TeXN0ZW0uVmVyc2lvbgQAAAAGX01ham9yBl9NaW5v
        cgZfQnVpbGQJX1JldmlzaW9uAAAAAAgICAgCAAAAAAAAAP//////////Cw==
</value>
  </data>
  <metadata name="line2.TrayLocation" type="System.Drawing.Point, System.Drawing, Version=4.0.0.0, Culture=neutral, PublicKeyToken=b03f5f7f11d50a3a">
    <value>580, 191</value>
  </metadata>
  <data name="line2.DataSource" mimetype="application/x-microsoft.net.object.binary.base64">
    <value>
        AAEAAAD/////AQAAAAAAAAAMAgAAAE5TeXN0ZW0uRGF0YSwgVmVyc2lvbj00LjAuMC4wLCBDdWx0dXJl
        PW5ldXRyYWwsIFB1YmxpY0tleVRva2VuPWI3N2E1YzU2MTkzNGUwODkFAQAAABNTeXN0ZW0uRGF0YS5E
        YXRhU2V0AwAAABdEYXRhU2V0LlJlbW90aW5nVmVyc2lvbglYbWxTY2hlbWELWG1sRGlmZkdyYW0DAQEO
        U3lzdGVtLlZlcnNpb24CAAAACQMAAAAGBAAAAI4GPD94bWwgdmVyc2lvbj0iMS4wIiBlbmNvZGluZz0i
        dXRmLTE2Ij8+DQo8eHM6c2NoZW1hIGlkPSJUZWVEYXRhU2V0IiB4bWxucz0iIiB4bWxuczp4cz0iaHR0
        cDovL3d3dy53My5vcmcvMjAwMS9YTUxTY2hlbWEiIHhtbG5zOm1zZGF0YT0idXJuOnNjaGVtYXMtbWlj
        cm9zb2Z0LWNvbTp4bWwtbXNkYXRhIj4NCiAgPHhzOmVsZW1lbnQgbmFtZT0iVGVlRGF0YVNldCIgbXNk
        YXRhOklzRGF0YVNldD0idHJ1ZSIgbXNkYXRhOlVzZUN1cnJlbnRMb2NhbGU9InRydWUiPg0KICAgIDx4
        czpjb21wbGV4VHlwZT4NCiAgICAgIDx4czpjaG9pY2UgbWluT2NjdXJzPSIwIiBtYXhPY2N1cnM9InVu
        Ym91bmRlZCI+DQogICAgICAgIDx4czplbGVtZW50IG5hbWU9IlRlZURhdGFUYWJsZSI+DQogICAgICAg
        ICAgPHhzOmNvbXBsZXhUeXBlPg0KICAgICAgICAgICAgPHhzOnNlcXVlbmNlPg0KICAgICAgICAgICAg
        ICA8eHM6ZWxlbWVudCBuYW1lPSJYIiB0eXBlPSJ4czpkb3VibGUiIG1zZGF0YTp0YXJnZXROYW1lc3Bh
        Y2U9IiIgbWluT2NjdXJzPSIwIiAvPg0KICAgICAgICAgICAgICA8eHM6ZWxlbWVudCBuYW1lPSJZIiB0
        eXBlPSJ4czpkb3VibGUiIG1zZGF0YTp0YXJnZXROYW1lc3BhY2U9IiIgbWluT2NjdXJzPSIwIiAvPg0K
        ICAgICAgICAgICAgPC94czpzZXF1ZW5jZT4NCiAgICAgICAgICA8L3hzOmNvbXBsZXhUeXBlPg0KICAg
        ICAgICA8L3hzOmVsZW1lbnQ+DQogICAgICA8L3hzOmNob2ljZT4NCiAgICA8L3hzOmNvbXBsZXhUeXBl
        Pg0KICA8L3hzOmVsZW1lbnQ+DQo8L3hzOnNjaGVtYT4GBQAAAMEZPGRpZmZncjpkaWZmZ3JhbSB4bWxu
        czptc2RhdGE9InVybjpzY2hlbWFzLW1pY3Jvc29mdC1jb206eG1sLW1zZGF0YSIgeG1sbnM6ZGlmZmdy
        PSJ1cm46c2NoZW1hcy1taWNyb3NvZnQtY29tOnhtbC1kaWZmZ3JhbS12MSI+PFRlZURhdGFTZXQ+PFRl
        ZURhdGFUYWJsZSBkaWZmZ3I6aWQ9IlRlZURhdGFUYWJsZTEiIG1zZGF0YTpyb3dPcmRlcj0iMCIgZGlm
        ZmdyOmhhc0NoYW5nZXM9Imluc2VydGVkIj48WD4wPC9YPjxZPjY4NzwvWT48L1RlZURhdGFUYWJsZT48
        VGVlRGF0YVRhYmxlIGRpZmZncjppZD0iVGVlRGF0YVRhYmxlMiIgbXNkYXRhOnJvd09yZGVyPSIxIiBk
        aWZmZ3I6aGFzQ2hhbmdlcz0iaW5zZXJ0ZWQiPjxYPjE8L1g+PFk+Njc1PC9ZPjwvVGVlRGF0YVRhYmxl
        PjxUZWVEYXRhVGFibGUgZGlmZmdyOmlkPSJUZWVEYXRhVGFibGUzIiBtc2RhdGE6cm93T3JkZXI9IjIi
        IGRpZmZncjpoYXNDaGFuZ2VzPSJpbnNlcnRlZCI+PFg+MjwvWD48WT43NDA8L1k+PC9UZWVEYXRhVGFi
        bGU+PFRlZURhdGFUYWJsZSBkaWZmZ3I6aWQ9IlRlZURhdGFUYWJsZTQiIG1zZGF0YTpyb3dPcmRlcj0i
        MyIgZGlmZmdyOmhhc0NoYW5nZXM9Imluc2VydGVkIj48WD4zPC9YPjxZPjY4NjwvWT48L1RlZURhdGFU
        YWJsZT48VGVlRGF0YVRhYmxlIGRpZmZncjppZD0iVGVlRGF0YVRhYmxlNSIgbXNkYXRhOnJvd09yZGVy
        PSI0IiBkaWZmZ3I6aGFzQ2hhbmdlcz0iaW5zZXJ0ZWQiPjxYPjQ8L1g+PFk+NjQwPC9ZPjwvVGVlRGF0
        YVRhYmxlPjxUZWVEYXRhVGFibGUgZGlmZmdyOmlkPSJUZWVEYXRhVGFibGU2IiBtc2RhdGE6cm93T3Jk
        ZXI9IjUiIGRpZmZncjpoYXNDaGFuZ2VzPSJpbnNlcnRlZCI+PFg+NTwvWD48WT41NTE8L1k+PC9UZWVE
        YXRhVGFibGU+PFRlZURhdGFUYWJsZSBkaWZmZ3I6aWQ9IlRlZURhdGFUYWJsZTciIG1zZGF0YTpyb3dP
        cmRlcj0iNiIgZGlmZmdyOmhhc0NoYW5nZXM9Imluc2VydGVkIj48WD42PC9YPjxZPjQ0NTwvWT48L1Rl
        ZURhdGFUYWJsZT48VGVlRGF0YVRhYmxlIGRpZmZncjppZD0iVGVlRGF0YVRhYmxlOCIgbXNkYXRhOnJv
        d09yZGVyPSI3IiBkaWZmZ3I6aGFzQ2hhbmdlcz0iaW5zZXJ0ZWQiPjxYPjc8L1g+PFk+NTM3PC9ZPjwv
        VGVlRGF0YVRhYmxlPjxUZWVEYXRhVGFibGUgZGlmZmdyOmlkPSJUZWVEYXRhVGFibGU5IiBtc2RhdGE6
        cm93T3JkZXI9IjgiIGRpZmZncjpoYXNDaGFuZ2VzPSJpbnNlcnRlZCI+PFg+ODwvWD48WT42MzY8L1k+
        PC9UZWVEYXRhVGFibGU+PFRlZURhdGFUYWJsZSBkaWZmZ3I6aWQ9IlRlZURhdGFUYWJsZTEwIiBtc2Rh
        dGE6cm93T3JkZXI9IjkiIGRpZmZncjpoYXNDaGFuZ2VzPSJpbnNlcnRlZCI+PFg+OTwvWD48WT41NDg8
        L1k+PC9UZWVEYXRhVGFibGU+PFRlZURhdGFUYWJsZSBkaWZmZ3I6aWQ9IlRlZURhdGFUYWJsZTExIiBt
        c2RhdGE6cm93T3JkZXI9IjEwIiBkaWZmZ3I6aGFzQ2hhbmdlcz0iaW5zZXJ0ZWQiPjxYPjEwPC9YPjxZ
        PjU5NTwvWT48L1RlZURhdGFUYWJsZT48VGVlRGF0YVRhYmxlIGRpZmZncjppZD0iVGVlRGF0YVRhYmxl
        MTIiIG1zZGF0YTpyb3dPcmRlcj0iMTEiIGRpZmZncjpoYXNDaGFuZ2VzPSJpbnNlcnRlZCI+PFg+MTE8
        L1g+PFk+NjM4PC9ZPjwvVGVlRGF0YVRhYmxlPjxUZWVEYXRhVGFibGUgZGlmZmdyOmlkPSJUZWVEYXRh
        VGFibGUxMyIgbXNkYXRhOnJvd09yZGVyPSIxMiIgZGlmZmdyOmhhc0NoYW5nZXM9Imluc2VydGVkIj48
        WD4xMjwvWD48WT41OTU8L1k+PC9UZWVEYXRhVGFibGU+PFRlZURhdGFUYWJsZSBkaWZmZ3I6aWQ9IlRl
        ZURhdGFUYWJsZTE0IiBtc2RhdGE6cm93T3JkZXI9IjEzIiBkaWZmZ3I6aGFzQ2hhbmdlcz0iaW5zZXJ0
        ZWQiPjxYPjEzPC9YPjxZPjY5NjwvWT48L1RlZURhdGFUYWJsZT48VGVlRGF0YVRhYmxlIGRpZmZncjpp
        ZD0iVGVlRGF0YVRhYmxlMTUiIG1zZGF0YTpyb3dPcmRlcj0iMTQiIGRpZmZncjpoYXNDaGFuZ2VzPSJp
        bnNlcnRlZCI+PFg+MTQ8L1g+PFk+Njg1PC9ZPjwvVGVlRGF0YVRhYmxlPjxUZWVEYXRhVGFibGUgZGlm
        ZmdyOmlkPSJUZWVEYXRhVGFibGUxNiIgbXNkYXRhOnJvd09yZGVyPSIxNSIgZGlmZmdyOmhhc0NoYW5n
        ZXM9Imluc2VydGVkIj48WD4xNTwvWD48WT43MzA8L1k+PC9UZWVEYXRhVGFibGU+PFRlZURhdGFUYWJs
        ZSBkaWZmZ3I6aWQ9IlRlZURhdGFUYWJsZTE3IiBtc2RhdGE6cm93T3JkZXI9IjE2IiBkaWZmZ3I6aGFz
        Q2hhbmdlcz0iaW5zZXJ0ZWQiPjxYPjE2PC9YPjxZPjgyMDwvWT48L1RlZURhdGFUYWJsZT48VGVlRGF0
        YVRhYmxlIGRpZmZncjppZD0iVGVlRGF0YVRhYmxlMTgiIG1zZGF0YTpyb3dPcmRlcj0iMTciIGRpZmZn
        cjpoYXNDaGFuZ2VzPSJpbnNlcnRlZCI+PFg+MTc8L1g+PFk+OTQyPC9ZPjwvVGVlRGF0YVRhYmxlPjxU
        ZWVEYXRhVGFibGUgZGlmZmdyOmlkPSJUZWVEYXRhVGFibGUxOSIgbXNkYXRhOnJvd09yZGVyPSIxOCIg
        ZGlmZmdyOmhhc0NoYW5nZXM9Imluc2VydGVkIj48WD4xODwvWD48WT45MDU8L1k+PC9UZWVEYXRhVGFi
        bGU+PFRlZURhdGFUYWJsZSBkaWZmZ3I6aWQ9IlRlZURhdGFUYWJsZTIwIiBtc2RhdGE6cm93T3JkZXI9
        IjE5IiBkaWZmZ3I6aGFzQ2hhbmdlcz0iaW5zZXJ0ZWQiPjxYPjE5PC9YPjxZPjg2NjwvWT48L1RlZURh
        dGFUYWJsZT48VGVlRGF0YVRhYmxlIGRpZmZncjppZD0iVGVlRGF0YVRhYmxlMjEiIG1zZGF0YTpyb3dP
        cmRlcj0iMjAiIGRpZmZncjpoYXNDaGFuZ2VzPSJpbnNlcnRlZCI+PFg+MjA8L1g+PFk+ODIzPC9ZPjwv
        VGVlRGF0YVRhYmxlPjxUZWVEYXRhVGFibGUgZGlmZmdyOmlkPSJUZWVEYXRhVGFibGUyMiIgbXNkYXRh
        OnJvd09yZGVyPSIyMSIgZGlmZmdyOmhhc0NoYW5nZXM9Imluc2VydGVkIj48WD4yMTwvWD48WT43ODg8
        L1k+PC9UZWVEYXRhVGFibGU+PFRlZURhdGFUYWJsZSBkaWZmZ3I6aWQ9IlRlZURhdGFUYWJsZTIzIiBt
        c2RhdGE6cm93T3JkZXI9IjIyIiBkaWZmZ3I6aGFzQ2hhbmdlcz0iaW5zZXJ0ZWQiPjxYPjIyPC9YPjxZ
        Pjg4MzwvWT48L1RlZURhdGFUYWJsZT48VGVlRGF0YVRhYmxlIGRpZmZncjppZD0iVGVlRGF0YVRhYmxl
        MjQiIG1zZGF0YTpyb3dPcmRlcj0iMjMiIGRpZmZncjpoYXNDaGFuZ2VzPSJpbnNlcnRlZCI+PFg+MjM8
        L1g+PFk+ODM2PC9ZPjwvVGVlRGF0YVRhYmxlPjxUZWVEYXRhVGFibGUgZGlmZmdyOmlkPSJUZWVEYXRh
        VGFibGUyNSIgbXNkYXRhOnJvd09yZGVyPSIyNCIgZGlmZmdyOmhhc0NoYW5nZXM9Imluc2VydGVkIj48
        WD4yNDwvWD48WT43MTU8L1k+PC9UZWVEYXRhVGFibGU+PC9UZWVEYXRhU2V0PjwvZGlmZmdyOmRpZmZn
        cmFtPgQDAAAADlN5c3RlbS5WZXJzaW9uBAAAAAZfTWFqb3IGX01pbm9yBl9CdWlsZAlfUmV2aXNpb24A
        AAAACAgICAIAAAAAAAAA//////////8L
</value>
  </data>
  <metadata name="contextMenuStrip1.TrayLocation" type="System.Drawing.Point, System.Drawing, Version=4.0.0.0, Culture=neutral, PublicKeyToken=b03f5f7f11d50a3a">
    <value>647, 236</value>
  </metadata>
  <metadata name="line3.TrayLocation" type="System.Drawing.Point, System.Drawing, Version=4.0.0.0, Culture=neutral, PublicKeyToken=b03f5f7f11d50a3a">
    <value>281, 236</value>
  </metadata>
  <data name="line3.DataSource" mimetype="application/x-microsoft.net.object.binary.base64">
    <value>
        AAEAAAD/////AQAAAAAAAAAMAgAAAE5TeXN0ZW0uRGF0YSwgVmVyc2lvbj00LjAuMC4wLCBDdWx0dXJl
        PW5ldXRyYWwsIFB1YmxpY0tleVRva2VuPWI3N2E1YzU2MTkzNGUwODkFAQAAABNTeXN0ZW0uRGF0YS5E
        YXRhU2V0AwAAABdEYXRhU2V0LlJlbW90aW5nVmVyc2lvbglYbWxTY2hlbWELWG1sRGlmZkdyYW0DAQEO
        U3lzdGVtLlZlcnNpb24CAAAACQMAAAAGBAAAAI4GPD94bWwgdmVyc2lvbj0iMS4wIiBlbmNvZGluZz0i
        dXRmLTE2Ij8+DQo8eHM6c2NoZW1hIGlkPSJUZWVEYXRhU2V0IiB4bWxucz0iIiB4bWxuczp4cz0iaHR0
        cDovL3d3dy53My5vcmcvMjAwMS9YTUxTY2hlbWEiIHhtbG5zOm1zZGF0YT0idXJuOnNjaGVtYXMtbWlj
        cm9zb2Z0LWNvbTp4bWwtbXNkYXRhIj4NCiAgPHhzOmVsZW1lbnQgbmFtZT0iVGVlRGF0YVNldCIgbXNk
        YXRhOklzRGF0YVNldD0idHJ1ZSIgbXNkYXRhOlVzZUN1cnJlbnRMb2NhbGU9InRydWUiPg0KICAgIDx4
        czpjb21wbGV4VHlwZT4NCiAgICAgIDx4czpjaG9pY2UgbWluT2NjdXJzPSIwIiBtYXhPY2N1cnM9InVu
        Ym91bmRlZCI+DQogICAgICAgIDx4czplbGVtZW50IG5hbWU9IlRlZURhdGFUYWJsZSI+DQogICAgICAg
        ICAgPHhzOmNvbXBsZXhUeXBlPg0KICAgICAgICAgICAgPHhzOnNlcXVlbmNlPg0KICAgICAgICAgICAg
        ICA8eHM6ZWxlbWVudCBuYW1lPSJYIiB0eXBlPSJ4czpkb3VibGUiIG1zZGF0YTp0YXJnZXROYW1lc3Bh
        Y2U9IiIgbWluT2NjdXJzPSIwIiAvPg0KICAgICAgICAgICAgICA8eHM6ZWxlbWVudCBuYW1lPSJZIiB0
        eXBlPSJ4czpkb3VibGUiIG1zZGF0YTp0YXJnZXROYW1lc3BhY2U9IiIgbWluT2NjdXJzPSIwIiAvPg0K
        ICAgICAgICAgICAgPC94czpzZXF1ZW5jZT4NCiAgICAgICAgICA8L3hzOmNvbXBsZXhUeXBlPg0KICAg
        ICAgICA8L3hzOmVsZW1lbnQ+DQogICAgICA8L3hzOmNob2ljZT4NCiAgICA8L3hzOmNvbXBsZXhUeXBl
        Pg0KICA8L3hzOmVsZW1lbnQ+DQo8L3hzOnNjaGVtYT4GBQAAALEZPGRpZmZncjpkaWZmZ3JhbSB4bWxu
        czptc2RhdGE9InVybjpzY2hlbWFzLW1pY3Jvc29mdC1jb206eG1sLW1zZGF0YSIgeG1sbnM6ZGlmZmdy
        PSJ1cm46c2NoZW1hcy1taWNyb3NvZnQtY29tOnhtbC1kaWZmZ3JhbS12MSI+PFRlZURhdGFTZXQ+PFRl
        ZURhdGFUYWJsZSBkaWZmZ3I6aWQ9IlRlZURhdGFUYWJsZTEiIG1zZGF0YTpyb3dPcmRlcj0iMCIgZGlm
        ZmdyOmhhc0NoYW5nZXM9Imluc2VydGVkIj48WD4wPC9YPjxZPjk2PC9ZPjwvVGVlRGF0YVRhYmxlPjxU
        ZWVEYXRhVGFibGUgZGlmZmdyOmlkPSJUZWVEYXRhVGFibGUyIiBtc2RhdGE6cm93T3JkZXI9IjEiIGRp
        ZmZncjpoYXNDaGFuZ2VzPSJpbnNlcnRlZCI+PFg+MTwvWD48WT4yPC9ZPjwvVGVlRGF0YVRhYmxlPjxU
        ZWVEYXRhVGFibGUgZGlmZmdyOmlkPSJUZWVEYXRhVGFibGUzIiBtc2RhdGE6cm93T3JkZXI9IjIiIGRp
        ZmZncjpoYXNDaGFuZ2VzPSJpbnNlcnRlZCI+PFg+MjwvWD48WT40MTwvWT48L1RlZURhdGFUYWJsZT48
        VGVlRGF0YVRhYmxlIGRpZmZncjppZD0iVGVlRGF0YVRhYmxlNCIgbXNkYXRhOnJvd09yZGVyPSIzIiBk
        aWZmZ3I6aGFzQ2hhbmdlcz0iaW5zZXJ0ZWQiPjxYPjM8L1g+PFk+NDI8L1k+PC9UZWVEYXRhVGFibGU+
        PFRlZURhdGFUYWJsZSBkaWZmZ3I6aWQ9IlRlZURhdGFUYWJsZTUiIG1zZGF0YTpyb3dPcmRlcj0iNCIg
        ZGlmZmdyOmhhc0NoYW5nZXM9Imluc2VydGVkIj48WD40PC9YPjxZPjYxPC9ZPjwvVGVlRGF0YVRhYmxl
        PjxUZWVEYXRhVGFibGUgZGlmZmdyOmlkPSJUZWVEYXRhVGFibGU2IiBtc2RhdGE6cm93T3JkZXI9IjUi
        IGRpZmZncjpoYXNDaGFuZ2VzPSJpbnNlcnRlZCI+PFg+NTwvWD48WT43NDwvWT48L1RlZURhdGFUYWJs
        ZT48VGVlRGF0YVRhYmxlIGRpZmZncjppZD0iVGVlRGF0YVRhYmxlNyIgbXNkYXRhOnJvd09yZGVyPSI2
        IiBkaWZmZ3I6aGFzQ2hhbmdlcz0iaW5zZXJ0ZWQiPjxYPjY8L1g+PFk+MTg8L1k+PC9UZWVEYXRhVGFi
        bGU+PFRlZURhdGFUYWJsZSBkaWZmZ3I6aWQ9IlRlZURhdGFUYWJsZTgiIG1zZGF0YTpyb3dPcmRlcj0i
        NyIgZGlmZmdyOmhhc0NoYW5nZXM9Imluc2VydGVkIj48WD43PC9YPjxZPjIzPC9ZPjwvVGVlRGF0YVRh
        YmxlPjxUZWVEYXRhVGFibGUgZGlmZmdyOmlkPSJUZWVEYXRhVGFibGU5IiBtc2RhdGE6cm93T3JkZXI9
        IjgiIGRpZmZncjpoYXNDaGFuZ2VzPSJpbnNlcnRlZCI+PFg+ODwvWD48WT43MjwvWT48L1RlZURhdGFU
        YWJsZT48VGVlRGF0YVRhYmxlIGRpZmZncjppZD0iVGVlRGF0YVRhYmxlMTAiIG1zZGF0YTpyb3dPcmRl
        cj0iOSIgZGlmZmdyOmhhc0NoYW5nZXM9Imluc2VydGVkIj48WD45PC9YPjxZPjM3PC9ZPjwvVGVlRGF0
        YVRhYmxlPjxUZWVEYXRhVGFibGUgZGlmZmdyOmlkPSJUZWVEYXRhVGFibGUxMSIgbXNkYXRhOnJvd09y
        ZGVyPSIxMCIgZGlmZmdyOmhhc0NoYW5nZXM9Imluc2VydGVkIj48WD4xMDwvWD48WT4xMTM8L1k+PC9U
        ZWVEYXRhVGFibGU+PFRlZURhdGFUYWJsZSBkaWZmZ3I6aWQ9IlRlZURhdGFUYWJsZTEyIiBtc2RhdGE6
        cm93T3JkZXI9IjExIiBkaWZmZ3I6aGFzQ2hhbmdlcz0iaW5zZXJ0ZWQiPjxYPjExPC9YPjxZPjY8L1k+
        PC9UZWVEYXRhVGFibGU+PFRlZURhdGFUYWJsZSBkaWZmZ3I6aWQ9IlRlZURhdGFUYWJsZTEzIiBtc2Rh
        dGE6cm93T3JkZXI9IjEyIiBkaWZmZ3I6aGFzQ2hhbmdlcz0iaW5zZXJ0ZWQiPjxYPjEyPC9YPjxZPjk4
        PC9ZPjwvVGVlRGF0YVRhYmxlPjxUZWVEYXRhVGFibGUgZGlmZmdyOmlkPSJUZWVEYXRhVGFibGUxNCIg
        bXNkYXRhOnJvd09yZGVyPSIxMyIgZGlmZmdyOmhhc0NoYW5nZXM9Imluc2VydGVkIj48WD4xMzwvWD48
        WT4xMzwvWT48L1RlZURhdGFUYWJsZT48VGVlRGF0YVRhYmxlIGRpZmZncjppZD0iVGVlRGF0YVRhYmxl
        MTUiIG1zZGF0YTpyb3dPcmRlcj0iMTQiIGRpZmZncjpoYXNDaGFuZ2VzPSJpbnNlcnRlZCI+PFg+MTQ8
        L1g+PFk+OTg8L1k+PC9UZWVEYXRhVGFibGU+PFRlZURhdGFUYWJsZSBkaWZmZ3I6aWQ9IlRlZURhdGFU
        YWJsZTE2IiBtc2RhdGE6cm93T3JkZXI9IjE1IiBkaWZmZ3I6aGFzQ2hhbmdlcz0iaW5zZXJ0ZWQiPjxY
        PjE1PC9YPjxZPjIwMDwvWT48L1RlZURhdGFUYWJsZT48VGVlRGF0YVRhYmxlIGRpZmZncjppZD0iVGVl
        RGF0YVRhYmxlMTciIG1zZGF0YTpyb3dPcmRlcj0iMTYiIGRpZmZncjpoYXNDaGFuZ2VzPSJpbnNlcnRl
        ZCI+PFg+MTY8L1g+PFk+MjU2PC9ZPjwvVGVlRGF0YVRhYmxlPjxUZWVEYXRhVGFibGUgZGlmZmdyOmlk
        PSJUZWVEYXRhVGFibGUxOCIgbXNkYXRhOnJvd09yZGVyPSIxNyIgZGlmZmdyOmhhc0NoYW5nZXM9Imlu
        c2VydGVkIj48WD4xNzwvWD48WT4zMTU8L1k+PC9UZWVEYXRhVGFibGU+PFRlZURhdGFUYWJsZSBkaWZm
        Z3I6aWQ9IlRlZURhdGFUYWJsZTE5IiBtc2RhdGE6cm93T3JkZXI9IjE4IiBkaWZmZ3I6aGFzQ2hhbmdl
        cz0iaW5zZXJ0ZWQiPjxYPjE4PC9YPjxZPjM0MjwvWT48L1RlZURhdGFUYWJsZT48VGVlRGF0YVRhYmxl
        IGRpZmZncjppZD0iVGVlRGF0YVRhYmxlMjAiIG1zZGF0YTpyb3dPcmRlcj0iMTkiIGRpZmZncjpoYXND
        aGFuZ2VzPSJpbnNlcnRlZCI+PFg+MTk8L1g+PFk+NDIxPC9ZPjwvVGVlRGF0YVRhYmxlPjxUZWVEYXRh
        VGFibGUgZGlmZmdyOmlkPSJUZWVEYXRhVGFibGUyMSIgbXNkYXRhOnJvd09yZGVyPSIyMCIgZGlmZmdy
        Omhhc0NoYW5nZXM9Imluc2VydGVkIj48WD4yMDwvWD48WT40NzA8L1k+PC9UZWVEYXRhVGFibGU+PFRl
        ZURhdGFUYWJsZSBkaWZmZ3I6aWQ9IlRlZURhdGFUYWJsZTIyIiBtc2RhdGE6cm93T3JkZXI9IjIxIiBk
        aWZmZ3I6aGFzQ2hhbmdlcz0iaW5zZXJ0ZWQiPjxYPjIxPC9YPjxZPjQ3ODwvWT48L1RlZURhdGFUYWJs
        ZT48VGVlRGF0YVRhYmxlIGRpZmZncjppZD0iVGVlRGF0YVRhYmxlMjMiIG1zZGF0YTpyb3dPcmRlcj0i
        MjIiIGRpZmZncjpoYXNDaGFuZ2VzPSJpbnNlcnRlZCI+PFg+MjI8L1g+PFk+NTQ1PC9ZPjwvVGVlRGF0
        YVRhYmxlPjxUZWVEYXRhVGFibGUgZGlmZmdyOmlkPSJUZWVEYXRhVGFibGUyNCIgbXNkYXRhOnJvd09y
        ZGVyPSIyMyIgZGlmZmdyOmhhc0NoYW5nZXM9Imluc2VydGVkIj48WD4yMzwvWD48WT42MTI8L1k+PC9U
        ZWVEYXRhVGFibGU+PFRlZURhdGFUYWJsZSBkaWZmZ3I6aWQ9IlRlZURhdGFUYWJsZTI1IiBtc2RhdGE6
        cm93T3JkZXI9IjI0IiBkaWZmZ3I6aGFzQ2hhbmdlcz0iaW5zZXJ0ZWQiPjxYPjI0PC9YPjxZPjY0MDwv
        WT48L1RlZURhdGFUYWJsZT48L1RlZURhdGFTZXQ+PC9kaWZmZ3I6ZGlmZmdyYW0+BAMAAAAOU3lzdGVt
        LlZlcnNpb24EAAAABl9NYWpvcgZfTWlub3IGX0J1aWxkCV9SZXZpc2lvbgAAAAAICAgIAgAAAAAAAAD/
        /////////ws=
</value>
  </data>
  <metadata name="line9.TrayLocation" type="System.Drawing.Point, System.Drawing, Version=4.0.0.0, Culture=neutral, PublicKeyToken=b03f5f7f11d50a3a">
    <value>369, 236</value>
  </metadata>
  <data name="line9.DataSource" mimetype="application/x-microsoft.net.object.binary.base64">
    <value>
        AAEAAAD/////AQAAAAAAAAAMAgAAAE5TeXN0ZW0uRGF0YSwgVmVyc2lvbj00LjAuMC4wLCBDdWx0dXJl
        PW5ldXRyYWwsIFB1YmxpY0tleVRva2VuPWI3N2E1YzU2MTkzNGUwODkFAQAAABNTeXN0ZW0uRGF0YS5E
        YXRhU2V0AwAAABdEYXRhU2V0LlJlbW90aW5nVmVyc2lvbglYbWxTY2hlbWELWG1sRGlmZkdyYW0DAQEO
        U3lzdGVtLlZlcnNpb24CAAAACQMAAAAGBAAAAI4GPD94bWwgdmVyc2lvbj0iMS4wIiBlbmNvZGluZz0i
        dXRmLTE2Ij8+DQo8eHM6c2NoZW1hIGlkPSJUZWVEYXRhU2V0IiB4bWxucz0iIiB4bWxuczp4cz0iaHR0
        cDovL3d3dy53My5vcmcvMjAwMS9YTUxTY2hlbWEiIHhtbG5zOm1zZGF0YT0idXJuOnNjaGVtYXMtbWlj
        cm9zb2Z0LWNvbTp4bWwtbXNkYXRhIj4NCiAgPHhzOmVsZW1lbnQgbmFtZT0iVGVlRGF0YVNldCIgbXNk
        YXRhOklzRGF0YVNldD0idHJ1ZSIgbXNkYXRhOlVzZUN1cnJlbnRMb2NhbGU9InRydWUiPg0KICAgIDx4
        czpjb21wbGV4VHlwZT4NCiAgICAgIDx4czpjaG9pY2UgbWluT2NjdXJzPSIwIiBtYXhPY2N1cnM9InVu
        Ym91bmRlZCI+DQogICAgICAgIDx4czplbGVtZW50IG5hbWU9IlRlZURhdGFUYWJsZSI+DQogICAgICAg
        ICAgPHhzOmNvbXBsZXhUeXBlPg0KICAgICAgICAgICAgPHhzOnNlcXVlbmNlPg0KICAgICAgICAgICAg
        ICA8eHM6ZWxlbWVudCBuYW1lPSJYIiB0eXBlPSJ4czpkb3VibGUiIG1zZGF0YTp0YXJnZXROYW1lc3Bh
        Y2U9IiIgbWluT2NjdXJzPSIwIiAvPg0KICAgICAgICAgICAgICA8eHM6ZWxlbWVudCBuYW1lPSJZIiB0
        eXBlPSJ4czpkb3VibGUiIG1zZGF0YTp0YXJnZXROYW1lc3BhY2U9IiIgbWluT2NjdXJzPSIwIiAvPg0K
        ICAgICAgICAgICAgPC94czpzZXF1ZW5jZT4NCiAgICAgICAgICA8L3hzOmNvbXBsZXhUeXBlPg0KICAg
        ICAgICA8L3hzOmVsZW1lbnQ+DQogICAgICA8L3hzOmNob2ljZT4NCiAgICA8L3hzOmNvbXBsZXhUeXBl
        Pg0KICA8L3hzOmVsZW1lbnQ+DQo8L3hzOnNjaGVtYT4GBQAAAMEZPGRpZmZncjpkaWZmZ3JhbSB4bWxu
        czptc2RhdGE9InVybjpzY2hlbWFzLW1pY3Jvc29mdC1jb206eG1sLW1zZGF0YSIgeG1sbnM6ZGlmZmdy
        PSJ1cm46c2NoZW1hcy1taWNyb3NvZnQtY29tOnhtbC1kaWZmZ3JhbS12MSI+PFRlZURhdGFTZXQ+PFRl
        ZURhdGFUYWJsZSBkaWZmZ3I6aWQ9IlRlZURhdGFUYWJsZTEiIG1zZGF0YTpyb3dPcmRlcj0iMCIgZGlm
        ZmdyOmhhc0NoYW5nZXM9Imluc2VydGVkIj48WD4wPC9YPjxZPjQ3MTwvWT48L1RlZURhdGFUYWJsZT48
        VGVlRGF0YVRhYmxlIGRpZmZncjppZD0iVGVlRGF0YVRhYmxlMiIgbXNkYXRhOnJvd09yZGVyPSIxIiBk
        aWZmZ3I6aGFzQ2hhbmdlcz0iaW5zZXJ0ZWQiPjxYPjE8L1g+PFk+NDgzPC9ZPjwvVGVlRGF0YVRhYmxl
        PjxUZWVEYXRhVGFibGUgZGlmZmdyOmlkPSJUZWVEYXRhVGFibGUzIiBtc2RhdGE6cm93T3JkZXI9IjIi
        IGRpZmZncjpoYXNDaGFuZ2VzPSJpbnNlcnRlZCI+PFg+MjwvWD48WT41NTI8L1k+PC9UZWVEYXRhVGFi
        bGU+PFRlZURhdGFUYWJsZSBkaWZmZ3I6aWQ9IlRlZURhdGFUYWJsZTQiIG1zZGF0YTpyb3dPcmRlcj0i
        MyIgZGlmZmdyOmhhc0NoYW5nZXM9Imluc2VydGVkIj48WD4zPC9YPjxZPjYxOTwvWT48L1RlZURhdGFU
        YWJsZT48VGVlRGF0YVRhYmxlIGRpZmZncjppZD0iVGVlRGF0YVRhYmxlNSIgbXNkYXRhOnJvd09yZGVy
        PSI0IiBkaWZmZ3I6aGFzQ2hhbmdlcz0iaW5zZXJ0ZWQiPjxYPjQ8L1g+PFk+NjM4PC9ZPjwvVGVlRGF0
        YVRhYmxlPjxUZWVEYXRhVGFibGUgZGlmZmdyOmlkPSJUZWVEYXRhVGFibGU2IiBtc2RhdGE6cm93T3Jk
        ZXI9IjUiIGRpZmZncjpoYXNDaGFuZ2VzPSJpbnNlcnRlZCI+PFg+NTwvWD48WT41NTg8L1k+PC9UZWVE
        YXRhVGFibGU+PFRlZURhdGFUYWJsZSBkaWZmZ3I6aWQ9IlRlZURhdGFUYWJsZTciIG1zZGF0YTpyb3dP
        cmRlcj0iNiIgZGlmZmdyOmhhc0NoYW5nZXM9Imluc2VydGVkIj48WD42PC9YPjxZPjQ4NDwvWT48L1Rl
        ZURhdGFUYWJsZT48VGVlRGF0YVRhYmxlIGRpZmZncjppZD0iVGVlRGF0YVRhYmxlOCIgbXNkYXRhOnJv
        d09yZGVyPSI3IiBkaWZmZ3I6aGFzQ2hhbmdlcz0iaW5zZXJ0ZWQiPjxYPjc8L1g+PFk+NDM1PC9ZPjwv
        VGVlRGF0YVRhYmxlPjxUZWVEYXRhVGFibGUgZGlmZmdyOmlkPSJUZWVEYXRhVGFibGU5IiBtc2RhdGE6
        cm93T3JkZXI9IjgiIGRpZmZncjpoYXNDaGFuZ2VzPSJpbnNlcnRlZCI+PFg+ODwvWD48WT40Mzk8L1k+
        PC9UZWVEYXRhVGFibGU+PFRlZURhdGFUYWJsZSBkaWZmZ3I6aWQ9IlRlZURhdGFUYWJsZTEwIiBtc2Rh
        dGE6cm93T3JkZXI9IjkiIGRpZmZncjpoYXNDaGFuZ2VzPSJpbnNlcnRlZCI+PFg+OTwvWD48WT4zODY8
        L1k+PC9UZWVEYXRhVGFibGU+PFRlZURhdGFUYWJsZSBkaWZmZ3I6aWQ9IlRlZURhdGFUYWJsZTExIiBt
        c2RhdGE6cm93T3JkZXI9IjEwIiBkaWZmZ3I6aGFzQ2hhbmdlcz0iaW5zZXJ0ZWQiPjxYPjEwPC9YPjxZ
        PjQ0OTwvWT48L1RlZURhdGFUYWJsZT48VGVlRGF0YVRhYmxlIGRpZmZncjppZD0iVGVlRGF0YVRhYmxl
        MTIiIG1zZGF0YTpyb3dPcmRlcj0iMTEiIGRpZmZncjpoYXNDaGFuZ2VzPSJpbnNlcnRlZCI+PFg+MTE8
        L1g+PFk+NDcxPC9ZPjwvVGVlRGF0YVRhYmxlPjxUZWVEYXRhVGFibGUgZGlmZmdyOmlkPSJUZWVEYXRh
        VGFibGUxMyIgbXNkYXRhOnJvd09yZGVyPSIxMiIgZGlmZmdyOmhhc0NoYW5nZXM9Imluc2VydGVkIj48
        WD4xMjwvWD48WT40NTY8L1k+PC9UZWVEYXRhVGFibGU+PFRlZURhdGFUYWJsZSBkaWZmZ3I6aWQ9IlRl
        ZURhdGFUYWJsZTE0IiBtc2RhdGE6cm93T3JkZXI9IjEzIiBkaWZmZ3I6aGFzQ2hhbmdlcz0iaW5zZXJ0
        ZWQiPjxYPjEzPC9YPjxZPjUxMzwvWT48L1RlZURhdGFUYWJsZT48VGVlRGF0YVRhYmxlIGRpZmZncjpp
        ZD0iVGVlRGF0YVRhYmxlMTUiIG1zZGF0YTpyb3dPcmRlcj0iMTQiIGRpZmZncjpoYXNDaGFuZ2VzPSJp
        bnNlcnRlZCI+PFg+MTQ8L1g+PFk+NTA0PC9ZPjwvVGVlRGF0YVRhYmxlPjxUZWVEYXRhVGFibGUgZGlm
        ZmdyOmlkPSJUZWVEYXRhVGFibGUxNiIgbXNkYXRhOnJvd09yZGVyPSIxNSIgZGlmZmdyOmhhc0NoYW5n
        ZXM9Imluc2VydGVkIj48WD4xNTwvWD48WT41MDA8L1k+PC9UZWVEYXRhVGFibGU+PFRlZURhdGFUYWJs
        ZSBkaWZmZ3I6aWQ9IlRlZURhdGFUYWJsZTE3IiBtc2RhdGE6cm93T3JkZXI9IjE2IiBkaWZmZ3I6aGFz
        Q2hhbmdlcz0iaW5zZXJ0ZWQiPjxYPjE2PC9YPjxZPjQ5OTwvWT48L1RlZURhdGFUYWJsZT48VGVlRGF0
        YVRhYmxlIGRpZmZncjppZD0iVGVlRGF0YVRhYmxlMTgiIG1zZGF0YTpyb3dPcmRlcj0iMTciIGRpZmZn
        cjpoYXNDaGFuZ2VzPSJpbnNlcnRlZCI+PFg+MTc8L1g+PFk+NTYwPC9ZPjwvVGVlRGF0YVRhYmxlPjxU
        ZWVEYXRhVGFibGUgZGlmZmdyOmlkPSJUZWVEYXRhVGFibGUxOSIgbXNkYXRhOnJvd09yZGVyPSIxOCIg
        ZGlmZmdyOmhhc0NoYW5nZXM9Imluc2VydGVkIj48WD4xODwvWD48WT40ODA8L1k+PC9UZWVEYXRhVGFi
        bGU+PFRlZURhdGFUYWJsZSBkaWZmZ3I6aWQ9IlRlZURhdGFUYWJsZTIwIiBtc2RhdGE6cm93T3JkZXI9
        IjE5IiBkaWZmZ3I6aGFzQ2hhbmdlcz0iaW5zZXJ0ZWQiPjxYPjE5PC9YPjxZPjQwNDwvWT48L1RlZURh
        dGFUYWJsZT48VGVlRGF0YVRhYmxlIGRpZmZncjppZD0iVGVlRGF0YVRhYmxlMjEiIG1zZGF0YTpyb3dP
        cmRlcj0iMjAiIGRpZmZncjpoYXNDaGFuZ2VzPSJpbnNlcnRlZCI+PFg+MjA8L1g+PFk+NDczPC9ZPjwv
        VGVlRGF0YVRhYmxlPjxUZWVEYXRhVGFibGUgZGlmZmdyOmlkPSJUZWVEYXRhVGFibGUyMiIgbXNkYXRh
        OnJvd09yZGVyPSIyMSIgZGlmZmdyOmhhc0NoYW5nZXM9Imluc2VydGVkIj48WD4yMTwvWD48WT40NDg8
        L1k+PC9UZWVEYXRhVGFibGU+PFRlZURhdGFUYWJsZSBkaWZmZ3I6aWQ9IlRlZURhdGFUYWJsZTIzIiBt
        c2RhdGE6cm93T3JkZXI9IjIyIiBkaWZmZ3I6aGFzQ2hhbmdlcz0iaW5zZXJ0ZWQiPjxYPjIyPC9YPjxZ
        PjUwOTwvWT48L1RlZURhdGFUYWJsZT48VGVlRGF0YVRhYmxlIGRpZmZncjppZD0iVGVlRGF0YVRhYmxl
        MjQiIG1zZGF0YTpyb3dPcmRlcj0iMjMiIGRpZmZncjpoYXNDaGFuZ2VzPSJpbnNlcnRlZCI+PFg+MjM8
        L1g+PFk+NDkwPC9ZPjwvVGVlRGF0YVRhYmxlPjxUZWVEYXRhVGFibGUgZGlmZmdyOmlkPSJUZWVEYXRh
        VGFibGUyNSIgbXNkYXRhOnJvd09yZGVyPSIyNCIgZGlmZmdyOmhhc0NoYW5nZXM9Imluc2VydGVkIj48
        WD4yNDwvWD48WT41MzA8L1k+PC9UZWVEYXRhVGFibGU+PC9UZWVEYXRhU2V0PjwvZGlmZmdyOmRpZmZn
        cmFtPgQDAAAADlN5c3RlbS5WZXJzaW9uBAAAAAZfTWFqb3IGX01pbm9yBl9CdWlsZAlfUmV2aXNpb24A
        AAAACAgICAIAAAAAAAAA//////////8L
</value>
  </data>
  <metadata name="line10.TrayLocation" type="System.Drawing.Point, System.Drawing, Version=4.0.0.0, Culture=neutral, PublicKeyToken=b03f5f7f11d50a3a">
    <value>457, 236</value>
  </metadata>
  <data name="line10.DataSource" mimetype="application/x-microsoft.net.object.binary.base64">
    <value>
        AAEAAAD/////AQAAAAAAAAAMAgAAAE5TeXN0ZW0uRGF0YSwgVmVyc2lvbj00LjAuMC4wLCBDdWx0dXJl
        PW5ldXRyYWwsIFB1YmxpY0tleVRva2VuPWI3N2E1YzU2MTkzNGUwODkFAQAAABNTeXN0ZW0uRGF0YS5E
        YXRhU2V0AwAAABdEYXRhU2V0LlJlbW90aW5nVmVyc2lvbglYbWxTY2hlbWELWG1sRGlmZkdyYW0DAQEO
        U3lzdGVtLlZlcnNpb24CAAAACQMAAAAGBAAAAI4GPD94bWwgdmVyc2lvbj0iMS4wIiBlbmNvZGluZz0i
        dXRmLTE2Ij8+DQo8eHM6c2NoZW1hIGlkPSJUZWVEYXRhU2V0IiB4bWxucz0iIiB4bWxuczp4cz0iaHR0
        cDovL3d3dy53My5vcmcvMjAwMS9YTUxTY2hlbWEiIHhtbG5zOm1zZGF0YT0idXJuOnNjaGVtYXMtbWlj
        cm9zb2Z0LWNvbTp4bWwtbXNkYXRhIj4NCiAgPHhzOmVsZW1lbnQgbmFtZT0iVGVlRGF0YVNldCIgbXNk
        YXRhOklzRGF0YVNldD0idHJ1ZSIgbXNkYXRhOlVzZUN1cnJlbnRMb2NhbGU9InRydWUiPg0KICAgIDx4
        czpjb21wbGV4VHlwZT4NCiAgICAgIDx4czpjaG9pY2UgbWluT2NjdXJzPSIwIiBtYXhPY2N1cnM9InVu
        Ym91bmRlZCI+DQogICAgICAgIDx4czplbGVtZW50IG5hbWU9IlRlZURhdGFUYWJsZSI+DQogICAgICAg
        ICAgPHhzOmNvbXBsZXhUeXBlPg0KICAgICAgICAgICAgPHhzOnNlcXVlbmNlPg0KICAgICAgICAgICAg
        ICA8eHM6ZWxlbWVudCBuYW1lPSJYIiB0eXBlPSJ4czpkb3VibGUiIG1zZGF0YTp0YXJnZXROYW1lc3Bh
        Y2U9IiIgbWluT2NjdXJzPSIwIiAvPg0KICAgICAgICAgICAgICA8eHM6ZWxlbWVudCBuYW1lPSJZIiB0
        eXBlPSJ4czpkb3VibGUiIG1zZGF0YTp0YXJnZXROYW1lc3BhY2U9IiIgbWluT2NjdXJzPSIwIiAvPg0K
        ICAgICAgICAgICAgPC94czpzZXF1ZW5jZT4NCiAgICAgICAgICA8L3hzOmNvbXBsZXhUeXBlPg0KICAg
        ICAgICA8L3hzOmVsZW1lbnQ+DQogICAgICA8L3hzOmNob2ljZT4NCiAgICA8L3hzOmNvbXBsZXhUeXBl
        Pg0KICA8L3hzOmVsZW1lbnQ+DQo8L3hzOnNjaGVtYT4GBQAAAMEZPGRpZmZncjpkaWZmZ3JhbSB4bWxu
        czptc2RhdGE9InVybjpzY2hlbWFzLW1pY3Jvc29mdC1jb206eG1sLW1zZGF0YSIgeG1sbnM6ZGlmZmdy
        PSJ1cm46c2NoZW1hcy1taWNyb3NvZnQtY29tOnhtbC1kaWZmZ3JhbS12MSI+PFRlZURhdGFTZXQ+PFRl
        ZURhdGFUYWJsZSBkaWZmZ3I6aWQ9IlRlZURhdGFUYWJsZTEiIG1zZGF0YTpyb3dPcmRlcj0iMCIgZGlm
        ZmdyOmhhc0NoYW5nZXM9Imluc2VydGVkIj48WD4wPC9YPjxZPjQ4OTwvWT48L1RlZURhdGFUYWJsZT48
        VGVlRGF0YVRhYmxlIGRpZmZncjppZD0iVGVlRGF0YVRhYmxlMiIgbXNkYXRhOnJvd09yZGVyPSIxIiBk
        aWZmZ3I6aGFzQ2hhbmdlcz0iaW5zZXJ0ZWQiPjxYPjE8L1g+PFk+NDUxPC9ZPjwvVGVlRGF0YVRhYmxl
        PjxUZWVEYXRhVGFibGUgZGlmZmdyOmlkPSJUZWVEYXRhVGFibGUzIiBtc2RhdGE6cm93T3JkZXI9IjIi
        IGRpZmZncjpoYXNDaGFuZ2VzPSJpbnNlcnRlZCI+PFg+MjwvWD48WT40NTI8L1k+PC9UZWVEYXRhVGFi
        bGU+PFRlZURhdGFUYWJsZSBkaWZmZ3I6aWQ9IlRlZURhdGFUYWJsZTQiIG1zZGF0YTpyb3dPcmRlcj0i
        MyIgZGlmZmdyOmhhc0NoYW5nZXM9Imluc2VydGVkIj48WD4zPC9YPjxZPjQ2MDwvWT48L1RlZURhdGFU
        YWJsZT48VGVlRGF0YVRhYmxlIGRpZmZncjppZD0iVGVlRGF0YVRhYmxlNSIgbXNkYXRhOnJvd09yZGVy
        PSI0IiBkaWZmZ3I6aGFzQ2hhbmdlcz0iaW5zZXJ0ZWQiPjxYPjQ8L1g+PFk+NTMxPC9ZPjwvVGVlRGF0
        YVRhYmxlPjxUZWVEYXRhVGFibGUgZGlmZmdyOmlkPSJUZWVEYXRhVGFibGU2IiBtc2RhdGE6cm93T3Jk
        ZXI9IjUiIGRpZmZncjpoYXNDaGFuZ2VzPSJpbnNlcnRlZCI+PFg+NTwvWD48WT41NjM8L1k+PC9UZWVE
        YXRhVGFibGU+PFRlZURhdGFUYWJsZSBkaWZmZ3I6aWQ9IlRlZURhdGFUYWJsZTciIG1zZGF0YTpyb3dP
        cmRlcj0iNiIgZGlmZmdyOmhhc0NoYW5nZXM9Imluc2VydGVkIj48WD42PC9YPjxZPjU5MzwvWT48L1Rl
        ZURhdGFUYWJsZT48VGVlRGF0YVRhYmxlIGRpZmZncjppZD0iVGVlRGF0YVRhYmxlOCIgbXNkYXRhOnJv
        d09yZGVyPSI3IiBkaWZmZ3I6aGFzQ2hhbmdlcz0iaW5zZXJ0ZWQiPjxYPjc8L1g+PFk+NTIyPC9ZPjwv
        VGVlRGF0YVRhYmxlPjxUZWVEYXRhVGFibGUgZGlmZmdyOmlkPSJUZWVEYXRhVGFibGU5IiBtc2RhdGE6
        cm93T3JkZXI9IjgiIGRpZmZncjpoYXNDaGFuZ2VzPSJpbnNlcnRlZCI+PFg+ODwvWD48WT40ODM8L1k+
        PC9UZWVEYXRhVGFibGU+PFRlZURhdGFUYWJsZSBkaWZmZ3I6aWQ9IlRlZURhdGFUYWJsZTEwIiBtc2Rh
        dGE6cm93T3JkZXI9IjkiIGRpZmZncjpoYXNDaGFuZ2VzPSJpbnNlcnRlZCI+PFg+OTwvWD48WT41MTU8
        L1k+PC9UZWVEYXRhVGFibGU+PFRlZURhdGFUYWJsZSBkaWZmZ3I6aWQ9IlRlZURhdGFUYWJsZTExIiBt
        c2RhdGE6cm93T3JkZXI9IjEwIiBkaWZmZ3I6aGFzQ2hhbmdlcz0iaW5zZXJ0ZWQiPjxYPjEwPC9YPjxZ
        PjQ3MTwvWT48L1RlZURhdGFUYWJsZT48VGVlRGF0YVRhYmxlIGRpZmZncjppZD0iVGVlRGF0YVRhYmxl
        MTIiIG1zZGF0YTpyb3dPcmRlcj0iMTEiIGRpZmZncjpoYXNDaGFuZ2VzPSJpbnNlcnRlZCI+PFg+MTE8
        L1g+PFk+NDk0PC9ZPjwvVGVlRGF0YVRhYmxlPjxUZWVEYXRhVGFibGUgZGlmZmdyOmlkPSJUZWVEYXRh
        VGFibGUxMyIgbXNkYXRhOnJvd09yZGVyPSIxMiIgZGlmZmdyOmhhc0NoYW5nZXM9Imluc2VydGVkIj48
        WD4xMjwvWD48WT40ODg8L1k+PC9UZWVEYXRhVGFibGU+PFRlZURhdGFUYWJsZSBkaWZmZ3I6aWQ9IlRl
        ZURhdGFUYWJsZTE0IiBtc2RhdGE6cm93T3JkZXI9IjEzIiBkaWZmZ3I6aGFzQ2hhbmdlcz0iaW5zZXJ0
        ZWQiPjxYPjEzPC9YPjxZPjQzNjwvWT48L1RlZURhdGFUYWJsZT48VGVlRGF0YVRhYmxlIGRpZmZncjpp
        ZD0iVGVlRGF0YVRhYmxlMTUiIG1zZGF0YTpyb3dPcmRlcj0iMTQiIGRpZmZncjpoYXNDaGFuZ2VzPSJp
        bnNlcnRlZCI+PFg+MTQ8L1g+PFk+NDY2PC9ZPjwvVGVlRGF0YVRhYmxlPjxUZWVEYXRhVGFibGUgZGlm
        ZmdyOmlkPSJUZWVEYXRhVGFibGUxNiIgbXNkYXRhOnJvd09yZGVyPSIxNSIgZGlmZmdyOmhhc0NoYW5n
        ZXM9Imluc2VydGVkIj48WD4xNTwvWD48WT40NzY8L1k+PC9UZWVEYXRhVGFibGU+PFRlZURhdGFUYWJs
        ZSBkaWZmZ3I6aWQ9IlRlZURhdGFUYWJsZTE3IiBtc2RhdGE6cm93T3JkZXI9IjE2IiBkaWZmZ3I6aGFz
        Q2hhbmdlcz0iaW5zZXJ0ZWQiPjxYPjE2PC9YPjxZPjQwNzwvWT48L1RlZURhdGFUYWJsZT48VGVlRGF0
        YVRhYmxlIGRpZmZncjppZD0iVGVlRGF0YVRhYmxlMTgiIG1zZGF0YTpyb3dPcmRlcj0iMTciIGRpZmZn
        cjpoYXNDaGFuZ2VzPSJpbnNlcnRlZCI+PFg+MTc8L1g+PFk+MzgyPC9ZPjwvVGVlRGF0YVRhYmxlPjxU
        ZWVEYXRhVGFibGUgZGlmZmdyOmlkPSJUZWVEYXRhVGFibGUxOSIgbXNkYXRhOnJvd09yZGVyPSIxOCIg
        ZGlmZmdyOmhhc0NoYW5nZXM9Imluc2VydGVkIj48WD4xODwvWD48WT40NDg8L1k+PC9UZWVEYXRhVGFi
        bGU+PFRlZURhdGFUYWJsZSBkaWZmZ3I6aWQ9IlRlZURhdGFUYWJsZTIwIiBtc2RhdGE6cm93T3JkZXI9
        IjE5IiBkaWZmZ3I6aGFzQ2hhbmdlcz0iaW5zZXJ0ZWQiPjxYPjE5PC9YPjxZPjM5MzwvWT48L1RlZURh
        dGFUYWJsZT48VGVlRGF0YVRhYmxlIGRpZmZncjppZD0iVGVlRGF0YVRhYmxlMjEiIG1zZGF0YTpyb3dP
        cmRlcj0iMjAiIGRpZmZncjpoYXNDaGFuZ2VzPSJpbnNlcnRlZCI+PFg+MjA8L1g+PFk+NDEzPC9ZPjwv
        VGVlRGF0YVRhYmxlPjxUZWVEYXRhVGFibGUgZGlmZmdyOmlkPSJUZWVEYXRhVGFibGUyMiIgbXNkYXRh
        OnJvd09yZGVyPSIyMSIgZGlmZmdyOmhhc0NoYW5nZXM9Imluc2VydGVkIj48WD4yMTwvWD48WT4zODQ8
        L1k+PC9UZWVEYXRhVGFibGU+PFRlZURhdGFUYWJsZSBkaWZmZ3I6aWQ9IlRlZURhdGFUYWJsZTIzIiBt
        c2RhdGE6cm93T3JkZXI9IjIyIiBkaWZmZ3I6aGFzQ2hhbmdlcz0iaW5zZXJ0ZWQiPjxYPjIyPC9YPjxZ
        PjM3OTwvWT48L1RlZURhdGFUYWJsZT48VGVlRGF0YVRhYmxlIGRpZmZncjppZD0iVGVlRGF0YVRhYmxl
        MjQiIG1zZGF0YTpyb3dPcmRlcj0iMjMiIGRpZmZncjpoYXNDaGFuZ2VzPSJpbnNlcnRlZCI+PFg+MjM8
        L1g+PFk+MzYyPC9ZPjwvVGVlRGF0YVRhYmxlPjxUZWVEYXRhVGFibGUgZGlmZmdyOmlkPSJUZWVEYXRh
        VGFibGUyNSIgbXNkYXRhOnJvd09yZGVyPSIyNCIgZGlmZmdyOmhhc0NoYW5nZXM9Imluc2VydGVkIj48
        WD4yNDwvWD48WT40MDI8L1k+PC9UZWVEYXRhVGFibGU+PC9UZWVEYXRhU2V0PjwvZGlmZmdyOmRpZmZn
        cmFtPgQDAAAADlN5c3RlbS5WZXJzaW9uBAAAAAZfTWFqb3IGX01pbm9yBl9CdWlsZAlfUmV2aXNpb24A
        AAAACAgICAIAAAAAAAAA//////////8L
</value>
  </data>
  <metadata name="line11.TrayLocation" type="System.Drawing.Point, System.Drawing, Version=4.0.0.0, Culture=neutral, PublicKeyToken=b03f5f7f11d50a3a">
    <value>552, 236</value>
  </metadata>
  <data name="line11.DataSource" mimetype="application/x-microsoft.net.object.binary.base64">
    <value>
        AAEAAAD/////AQAAAAAAAAAMAgAAAE5TeXN0ZW0uRGF0YSwgVmVyc2lvbj00LjAuMC4wLCBDdWx0dXJl
        PW5ldXRyYWwsIFB1YmxpY0tleVRva2VuPWI3N2E1YzU2MTkzNGUwODkFAQAAABNTeXN0ZW0uRGF0YS5E
        YXRhU2V0AwAAABdEYXRhU2V0LlJlbW90aW5nVmVyc2lvbglYbWxTY2hlbWELWG1sRGlmZkdyYW0DAQEO
        U3lzdGVtLlZlcnNpb24CAAAACQMAAAAGBAAAAI4GPD94bWwgdmVyc2lvbj0iMS4wIiBlbmNvZGluZz0i
        dXRmLTE2Ij8+DQo8eHM6c2NoZW1hIGlkPSJUZWVEYXRhU2V0IiB4bWxucz0iIiB4bWxuczp4cz0iaHR0
        cDovL3d3dy53My5vcmcvMjAwMS9YTUxTY2hlbWEiIHhtbG5zOm1zZGF0YT0idXJuOnNjaGVtYXMtbWlj
        cm9zb2Z0LWNvbTp4bWwtbXNkYXRhIj4NCiAgPHhzOmVsZW1lbnQgbmFtZT0iVGVlRGF0YVNldCIgbXNk
        YXRhOklzRGF0YVNldD0idHJ1ZSIgbXNkYXRhOlVzZUN1cnJlbnRMb2NhbGU9InRydWUiPg0KICAgIDx4
        czpjb21wbGV4VHlwZT4NCiAgICAgIDx4czpjaG9pY2UgbWluT2NjdXJzPSIwIiBtYXhPY2N1cnM9InVu
        Ym91bmRlZCI+DQogICAgICAgIDx4czplbGVtZW50IG5hbWU9IlRlZURhdGFUYWJsZSI+DQogICAgICAg
        ICAgPHhzOmNvbXBsZXhUeXBlPg0KICAgICAgICAgICAgPHhzOnNlcXVlbmNlPg0KICAgICAgICAgICAg
        ICA8eHM6ZWxlbWVudCBuYW1lPSJYIiB0eXBlPSJ4czpkb3VibGUiIG1zZGF0YTp0YXJnZXROYW1lc3Bh
        Y2U9IiIgbWluT2NjdXJzPSIwIiAvPg0KICAgICAgICAgICAgICA8eHM6ZWxlbWVudCBuYW1lPSJZIiB0
        eXBlPSJ4czpkb3VibGUiIG1zZGF0YTp0YXJnZXROYW1lc3BhY2U9IiIgbWluT2NjdXJzPSIwIiAvPg0K
        ICAgICAgICAgICAgPC94czpzZXF1ZW5jZT4NCiAgICAgICAgICA8L3hzOmNvbXBsZXhUeXBlPg0KICAg
        ICAgICA8L3hzOmVsZW1lbnQ+DQogICAgICA8L3hzOmNob2ljZT4NCiAgICA8L3hzOmNvbXBsZXhUeXBl
        Pg0KICA8L3hzOmVsZW1lbnQ+DQo8L3hzOnNjaGVtYT4GBQAAALUZPGRpZmZncjpkaWZmZ3JhbSB4bWxu
        czptc2RhdGE9InVybjpzY2hlbWFzLW1pY3Jvc29mdC1jb206eG1sLW1zZGF0YSIgeG1sbnM6ZGlmZmdy
        PSJ1cm46c2NoZW1hcy1taWNyb3NvZnQtY29tOnhtbC1kaWZmZ3JhbS12MSI+PFRlZURhdGFTZXQ+PFRl
        ZURhdGFUYWJsZSBkaWZmZ3I6aWQ9IlRlZURhdGFUYWJsZTEiIG1zZGF0YTpyb3dPcmRlcj0iMCIgZGlm
        ZmdyOmhhc0NoYW5nZXM9Imluc2VydGVkIj48WD4wPC9YPjxZPjUxPC9ZPjwvVGVlRGF0YVRhYmxlPjxU
        ZWVEYXRhVGFibGUgZGlmZmdyOmlkPSJUZWVEYXRhVGFibGUyIiBtc2RhdGE6cm93T3JkZXI9IjEiIGRp
        ZmZncjpoYXNDaGFuZ2VzPSJpbnNlcnRlZCI+PFg+MTwvWD48WT4xMTM8L1k+PC9UZWVEYXRhVGFibGU+
        PFRlZURhdGFUYWJsZSBkaWZmZ3I6aWQ9IlRlZURhdGFUYWJsZTMiIG1zZGF0YTpyb3dPcmRlcj0iMiIg
        ZGlmZmdyOmhhc0NoYW5nZXM9Imluc2VydGVkIj48WD4yPC9YPjxZPjk1PC9ZPjwvVGVlRGF0YVRhYmxl
        PjxUZWVEYXRhVGFibGUgZGlmZmdyOmlkPSJUZWVEYXRhVGFibGU0IiBtc2RhdGE6cm93T3JkZXI9IjMi
        IGRpZmZncjpoYXNDaGFuZ2VzPSJpbnNlcnRlZCI+PFg+MzwvWD48WT4yODwvWT48L1RlZURhdGFUYWJs
        ZT48VGVlRGF0YVRhYmxlIGRpZmZncjppZD0iVGVlRGF0YVRhYmxlNSIgbXNkYXRhOnJvd09yZGVyPSI0
        IiBkaWZmZ3I6aGFzQ2hhbmdlcz0iaW5zZXJ0ZWQiPjxYPjQ8L1g+PFk+MjwvWT48L1RlZURhdGFUYWJs
        ZT48VGVlRGF0YVRhYmxlIGRpZmZncjppZD0iVGVlRGF0YVRhYmxlNiIgbXNkYXRhOnJvd09yZGVyPSI1
        IiBkaWZmZ3I6aGFzQ2hhbmdlcz0iaW5zZXJ0ZWQiPjxYPjU8L1g+PFk+NTQ8L1k+PC9UZWVEYXRhVGFi
        bGU+PFRlZURhdGFUYWJsZSBkaWZmZ3I6aWQ9IlRlZURhdGFUYWJsZTciIG1zZGF0YTpyb3dPcmRlcj0i
        NiIgZGlmZmdyOmhhc0NoYW5nZXM9Imluc2VydGVkIj48WD42PC9YPjxZPjEwMjwvWT48L1RlZURhdGFU
        YWJsZT48VGVlRGF0YVRhYmxlIGRpZmZncjppZD0iVGVlRGF0YVRhYmxlOCIgbXNkYXRhOnJvd09yZGVy
        PSI3IiBkaWZmZ3I6aGFzQ2hhbmdlcz0iaW5zZXJ0ZWQiPjxYPjc8L1g+PFk+MTUwPC9ZPjwvVGVlRGF0
        YVRhYmxlPjxUZWVEYXRhVGFibGUgZGlmZmdyOmlkPSJUZWVEYXRhVGFibGU5IiBtc2RhdGE6cm93T3Jk
        ZXI9IjgiIGRpZmZncjpoYXNDaGFuZ2VzPSJpbnNlcnRlZCI+PFg+ODwvWD48WT4xNjc8L1k+PC9UZWVE
        YXRhVGFibGU+PFRlZURhdGFUYWJsZSBkaWZmZ3I6aWQ9IlRlZURhdGFUYWJsZTEwIiBtc2RhdGE6cm93
        T3JkZXI9IjkiIGRpZmZncjpoYXNDaGFuZ2VzPSJpbnNlcnRlZCI+PFg+OTwvWD48WT4xMjg8L1k+PC9U
        ZWVEYXRhVGFibGU+PFRlZURhdGFUYWJsZSBkaWZmZ3I6aWQ9IlRlZURhdGFUYWJsZTExIiBtc2RhdGE6
        cm93T3JkZXI9IjEwIiBkaWZmZ3I6aGFzQ2hhbmdlcz0iaW5zZXJ0ZWQiPjxYPjEwPC9YPjxZPjE4ODwv
        WT48L1RlZURhdGFUYWJsZT48VGVlRGF0YVRhYmxlIGRpZmZncjppZD0iVGVlRGF0YVRhYmxlMTIiIG1z
        ZGF0YTpyb3dPcmRlcj0iMTEiIGRpZmZncjpoYXNDaGFuZ2VzPSJpbnNlcnRlZCI+PFg+MTE8L1g+PFk+
        MTYzPC9ZPjwvVGVlRGF0YVRhYmxlPjxUZWVEYXRhVGFibGUgZGlmZmdyOmlkPSJUZWVEYXRhVGFibGUx
        MyIgbXNkYXRhOnJvd09yZGVyPSIxMiIgZGlmZmdyOmhhc0NoYW5nZXM9Imluc2VydGVkIj48WD4xMjwv
        WD48WT4xNTY8L1k+PC9UZWVEYXRhVGFibGU+PFRlZURhdGFUYWJsZSBkaWZmZ3I6aWQ9IlRlZURhdGFU
        YWJsZTE0IiBtc2RhdGE6cm93T3JkZXI9IjEzIiBkaWZmZ3I6aGFzQ2hhbmdlcz0iaW5zZXJ0ZWQiPjxY
        PjEzPC9YPjxZPjE3NDwvWT48L1RlZURhdGFUYWJsZT48VGVlRGF0YVRhYmxlIGRpZmZncjppZD0iVGVl
        RGF0YVRhYmxlMTUiIG1zZGF0YTpyb3dPcmRlcj0iMTQiIGRpZmZncjpoYXNDaGFuZ2VzPSJpbnNlcnRl
        ZCI+PFg+MTQ8L1g+PFk+MTQ1PC9ZPjwvVGVlRGF0YVRhYmxlPjxUZWVEYXRhVGFibGUgZGlmZmdyOmlk
        PSJUZWVEYXRhVGFibGUxNiIgbXNkYXRhOnJvd09yZGVyPSIxNSIgZGlmZmdyOmhhc0NoYW5nZXM9Imlu
        c2VydGVkIj48WD4xNTwvWD48WT45MjwvWT48L1RlZURhdGFUYWJsZT48VGVlRGF0YVRhYmxlIGRpZmZn
        cjppZD0iVGVlRGF0YVRhYmxlMTciIG1zZGF0YTpyb3dPcmRlcj0iMTYiIGRpZmZncjpoYXNDaGFuZ2Vz
        PSJpbnNlcnRlZCI+PFg+MTY8L1g+PFk+MzQ8L1k+PC9UZWVEYXRhVGFibGU+PFRlZURhdGFUYWJsZSBk
        aWZmZ3I6aWQ9IlRlZURhdGFUYWJsZTE4IiBtc2RhdGE6cm93T3JkZXI9IjE3IiBkaWZmZ3I6aGFzQ2hh
        bmdlcz0iaW5zZXJ0ZWQiPjxYPjE3PC9YPjxZPjc0PC9ZPjwvVGVlRGF0YVRhYmxlPjxUZWVEYXRhVGFi
        bGUgZGlmZmdyOmlkPSJUZWVEYXRhVGFibGUxOSIgbXNkYXRhOnJvd09yZGVyPSIxOCIgZGlmZmdyOmhh
        c0NoYW5nZXM9Imluc2VydGVkIj48WD4xODwvWD48WT43PC9ZPjwvVGVlRGF0YVRhYmxlPjxUZWVEYXRh
        VGFibGUgZGlmZmdyOmlkPSJUZWVEYXRhVGFibGUyMCIgbXNkYXRhOnJvd09yZGVyPSIxOSIgZGlmZmdy
        Omhhc0NoYW5nZXM9Imluc2VydGVkIj48WD4xOTwvWD48WT41NzwvWT48L1RlZURhdGFUYWJsZT48VGVl
        RGF0YVRhYmxlIGRpZmZncjppZD0iVGVlRGF0YVRhYmxlMjEiIG1zZGF0YTpyb3dPcmRlcj0iMjAiIGRp
        ZmZncjpoYXNDaGFuZ2VzPSJpbnNlcnRlZCI+PFg+MjA8L1g+PFk+MTM1PC9ZPjwvVGVlRGF0YVRhYmxl
        PjxUZWVEYXRhVGFibGUgZGlmZmdyOmlkPSJUZWVEYXRhVGFibGUyMiIgbXNkYXRhOnJvd09yZGVyPSIy
        MSIgZGlmZmdyOmhhc0NoYW5nZXM9Imluc2VydGVkIj48WD4yMTwvWD48WT4xODk8L1k+PC9UZWVEYXRh
        VGFibGU+PFRlZURhdGFUYWJsZSBkaWZmZ3I6aWQ9IlRlZURhdGFUYWJsZTIzIiBtc2RhdGE6cm93T3Jk
        ZXI9IjIyIiBkaWZmZ3I6aGFzQ2hhbmdlcz0iaW5zZXJ0ZWQiPjxYPjIyPC9YPjxZPjI1OTwvWT48L1Rl
        ZURhdGFUYWJsZT48VGVlRGF0YVRhYmxlIGRpZmZncjppZD0iVGVlRGF0YVRhYmxlMjQiIG1zZGF0YTpy
        b3dPcmRlcj0iMjMiIGRpZmZncjpoYXNDaGFuZ2VzPSJpbnNlcnRlZCI+PFg+MjM8L1g+PFk+MzEzPC9Z
        PjwvVGVlRGF0YVRhYmxlPjxUZWVEYXRhVGFibGUgZGlmZmdyOmlkPSJUZWVEYXRhVGFibGUyNSIgbXNk
        YXRhOnJvd09yZGVyPSIyNCIgZGlmZmdyOmhhc0NoYW5nZXM9Imluc2VydGVkIj48WD4yNDwvWD48WT4z
        NDk8L1k+PC9UZWVEYXRhVGFibGU+PC9UZWVEYXRhU2V0PjwvZGlmZmdyOmRpZmZncmFtPgQDAAAADlN5
        c3RlbS5WZXJzaW9uBAAAAAZfTWFqb3IGX01pbm9yBl9CdWlsZAlfUmV2aXNpb24AAAAACAgICAIAAAAA
        AAAA//////////8L
</value>
  </data>
  <metadata name="line4.TrayLocation" type="System.Drawing.Point, System.Drawing, Version=4.0.0.0, Culture=neutral, PublicKeyToken=b03f5f7f11d50a3a">
    <value>756, 191</value>
  </metadata>
  <data name="line4.DataSource" mimetype="application/x-microsoft.net.object.binary.base64">
    <value>
        AAEAAAD/////AQAAAAAAAAAMAgAAAE5TeXN0ZW0uRGF0YSwgVmVyc2lvbj00LjAuMC4wLCBDdWx0dXJl
        PW5ldXRyYWwsIFB1YmxpY0tleVRva2VuPWI3N2E1YzU2MTkzNGUwODkFAQAAABNTeXN0ZW0uRGF0YS5E
        YXRhU2V0AwAAABdEYXRhU2V0LlJlbW90aW5nVmVyc2lvbglYbWxTY2hlbWELWG1sRGlmZkdyYW0DAQEO
        U3lzdGVtLlZlcnNpb24CAAAACQMAAAAGBAAAAI4GPD94bWwgdmVyc2lvbj0iMS4wIiBlbmNvZGluZz0i
        dXRmLTE2Ij8+DQo8eHM6c2NoZW1hIGlkPSJUZWVEYXRhU2V0IiB4bWxucz0iIiB4bWxuczp4cz0iaHR0
        cDovL3d3dy53My5vcmcvMjAwMS9YTUxTY2hlbWEiIHhtbG5zOm1zZGF0YT0idXJuOnNjaGVtYXMtbWlj
        cm9zb2Z0LWNvbTp4bWwtbXNkYXRhIj4NCiAgPHhzOmVsZW1lbnQgbmFtZT0iVGVlRGF0YVNldCIgbXNk
        YXRhOklzRGF0YVNldD0idHJ1ZSIgbXNkYXRhOlVzZUN1cnJlbnRMb2NhbGU9InRydWUiPg0KICAgIDx4
        czpjb21wbGV4VHlwZT4NCiAgICAgIDx4czpjaG9pY2UgbWluT2NjdXJzPSIwIiBtYXhPY2N1cnM9InVu
        Ym91bmRlZCI+DQogICAgICAgIDx4czplbGVtZW50IG5hbWU9IlRlZURhdGFUYWJsZSI+DQogICAgICAg
        ICAgPHhzOmNvbXBsZXhUeXBlPg0KICAgICAgICAgICAgPHhzOnNlcXVlbmNlPg0KICAgICAgICAgICAg
        ICA8eHM6ZWxlbWVudCBuYW1lPSJYIiB0eXBlPSJ4czpkb3VibGUiIG1zZGF0YTp0YXJnZXROYW1lc3Bh
        Y2U9IiIgbWluT2NjdXJzPSIwIiAvPg0KICAgICAgICAgICAgICA8eHM6ZWxlbWVudCBuYW1lPSJZIiB0
        eXBlPSJ4czpkb3VibGUiIG1zZGF0YTp0YXJnZXROYW1lc3BhY2U9IiIgbWluT2NjdXJzPSIwIiAvPg0K
        ICAgICAgICAgICAgPC94czpzZXF1ZW5jZT4NCiAgICAgICAgICA8L3hzOmNvbXBsZXhUeXBlPg0KICAg
        ICAgICA8L3hzOmVsZW1lbnQ+DQogICAgICA8L3hzOmNob2ljZT4NCiAgICA8L3hzOmNvbXBsZXhUeXBl
        Pg0KICA8L3hzOmVsZW1lbnQ+DQo8L3hzOnNjaGVtYT4GBQAAAMEZPGRpZmZncjpkaWZmZ3JhbSB4bWxu
        czptc2RhdGE9InVybjpzY2hlbWFzLW1pY3Jvc29mdC1jb206eG1sLW1zZGF0YSIgeG1sbnM6ZGlmZmdy
        PSJ1cm46c2NoZW1hcy1taWNyb3NvZnQtY29tOnhtbC1kaWZmZ3JhbS12MSI+PFRlZURhdGFTZXQ+PFRl
        ZURhdGFUYWJsZSBkaWZmZ3I6aWQ9IlRlZURhdGFUYWJsZTEiIG1zZGF0YTpyb3dPcmRlcj0iMCIgZGlm
        ZmdyOmhhc0NoYW5nZXM9Imluc2VydGVkIj48WD4wPC9YPjxZPjgwNzwvWT48L1RlZURhdGFUYWJsZT48
        VGVlRGF0YVRhYmxlIGRpZmZncjppZD0iVGVlRGF0YVRhYmxlMiIgbXNkYXRhOnJvd09yZGVyPSIxIiBk
        aWZmZ3I6aGFzQ2hhbmdlcz0iaW5zZXJ0ZWQiPjxYPjE8L1g+PFk+ODE5PC9ZPjwvVGVlRGF0YVRhYmxl
        PjxUZWVEYXRhVGFibGUgZGlmZmdyOmlkPSJUZWVEYXRhVGFibGUzIiBtc2RhdGE6cm93T3JkZXI9IjIi
        IGRpZmZncjpoYXNDaGFuZ2VzPSJpbnNlcnRlZCI+PFg+MjwvWD48WT45Mzg8L1k+PC9UZWVEYXRhVGFi
        bGU+PFRlZURhdGFUYWJsZSBkaWZmZ3I6aWQ9IlRlZURhdGFUYWJsZTQiIG1zZGF0YTpyb3dPcmRlcj0i
        MyIgZGlmZmdyOmhhc0NoYW5nZXM9Imluc2VydGVkIj48WD4zPC9YPjxZPjgyMTwvWT48L1RlZURhdGFU
        YWJsZT48VGVlRGF0YVRhYmxlIGRpZmZncjppZD0iVGVlRGF0YVRhYmxlNSIgbXNkYXRhOnJvd09yZGVy
        PSI0IiBkaWZmZ3I6aGFzQ2hhbmdlcz0iaW5zZXJ0ZWQiPjxYPjQ8L1g+PFk+ODQxPC9ZPjwvVGVlRGF0
        YVRhYmxlPjxUZWVEYXRhVGFibGUgZGlmZmdyOmlkPSJUZWVEYXRhVGFibGU2IiBtc2RhdGE6cm93T3Jk
        ZXI9IjUiIGRpZmZncjpoYXNDaGFuZ2VzPSJpbnNlcnRlZCI+PFg+NTwvWD48WT43MjA8L1k+PC9UZWVE
        YXRhVGFibGU+PFRlZURhdGFUYWJsZSBkaWZmZ3I6aWQ9IlRlZURhdGFUYWJsZTciIG1zZGF0YTpyb3dP
        cmRlcj0iNiIgZGlmZmdyOmhhc0NoYW5nZXM9Imluc2VydGVkIj48WD42PC9YPjxZPjc4MTwvWT48L1Rl
        ZURhdGFUYWJsZT48VGVlRGF0YVRhYmxlIGRpZmZncjppZD0iVGVlRGF0YVRhYmxlOCIgbXNkYXRhOnJv
        d09yZGVyPSI3IiBkaWZmZ3I6aGFzQ2hhbmdlcz0iaW5zZXJ0ZWQiPjxYPjc8L1g+PFk+ODQ4PC9ZPjwv
        VGVlRGF0YVRhYmxlPjxUZWVEYXRhVGFibGUgZGlmZmdyOmlkPSJUZWVEYXRhVGFibGU5IiBtc2RhdGE6
        cm93T3JkZXI9IjgiIGRpZmZncjpoYXNDaGFuZ2VzPSJpbnNlcnRlZCI+PFg+ODwvWD48WT43NDM8L1k+
        PC9UZWVEYXRhVGFibGU+PFRlZURhdGFUYWJsZSBkaWZmZ3I6aWQ9IlRlZURhdGFUYWJsZTEwIiBtc2Rh
        dGE6cm93T3JkZXI9IjkiIGRpZmZncjpoYXNDaGFuZ2VzPSJpbnNlcnRlZCI+PFg+OTwvWD48WT42Nzc8
        L1k+PC9UZWVEYXRhVGFibGU+PFRlZURhdGFUYWJsZSBkaWZmZ3I6aWQ9IlRlZURhdGFUYWJsZTExIiBt
        c2RhdGE6cm93T3JkZXI9IjEwIiBkaWZmZ3I6aGFzQ2hhbmdlcz0iaW5zZXJ0ZWQiPjxYPjEwPC9YPjxZ
        PjY1NjwvWT48L1RlZURhdGFUYWJsZT48VGVlRGF0YVRhYmxlIGRpZmZncjppZD0iVGVlRGF0YVRhYmxl
        MTIiIG1zZGF0YTpyb3dPcmRlcj0iMTEiIGRpZmZncjpoYXNDaGFuZ2VzPSJpbnNlcnRlZCI+PFg+MTE8
        L1g+PFk+NTc5PC9ZPjwvVGVlRGF0YVRhYmxlPjxUZWVEYXRhVGFibGUgZGlmZmdyOmlkPSJUZWVEYXRh
        VGFibGUxMyIgbXNkYXRhOnJvd09yZGVyPSIxMiIgZGlmZmdyOmhhc0NoYW5nZXM9Imluc2VydGVkIj48
        WD4xMjwvWD48WT42MDc8L1k+PC9UZWVEYXRhVGFibGU+PFRlZURhdGFUYWJsZSBkaWZmZ3I6aWQ9IlRl
        ZURhdGFUYWJsZTE0IiBtc2RhdGE6cm93T3JkZXI9IjEzIiBkaWZmZ3I6aGFzQ2hhbmdlcz0iaW5zZXJ0
        ZWQiPjxYPjEzPC9YPjxZPjYxMDwvWT48L1RlZURhdGFUYWJsZT48VGVlRGF0YVRhYmxlIGRpZmZncjpp
        ZD0iVGVlRGF0YVRhYmxlMTUiIG1zZGF0YTpyb3dPcmRlcj0iMTQiIGRpZmZncjpoYXNDaGFuZ2VzPSJp
        bnNlcnRlZCI+PFg+MTQ8L1g+PFk+NzExPC9ZPjwvVGVlRGF0YVRhYmxlPjxUZWVEYXRhVGFibGUgZGlm
        ZmdyOmlkPSJUZWVEYXRhVGFibGUxNiIgbXNkYXRhOnJvd09yZGVyPSIxNSIgZGlmZmdyOmhhc0NoYW5n
        ZXM9Imluc2VydGVkIj48WD4xNTwvWD48WT44MjY8L1k+PC9UZWVEYXRhVGFibGU+PFRlZURhdGFUYWJs
        ZSBkaWZmZ3I6aWQ9IlRlZURhdGFUYWJsZTE3IiBtc2RhdGE6cm93T3JkZXI9IjE2IiBkaWZmZ3I6aGFz
        Q2hhbmdlcz0iaW5zZXJ0ZWQiPjxYPjE2PC9YPjxZPjc2NjwvWT48L1RlZURhdGFUYWJsZT48VGVlRGF0
        YVRhYmxlIGRpZmZncjppZD0iVGVlRGF0YVRhYmxlMTgiIG1zZGF0YTpyb3dPcmRlcj0iMTciIGRpZmZn
        cjpoYXNDaGFuZ2VzPSJpbnNlcnRlZCI+PFg+MTc8L1g+PFk+NzY4PC9ZPjwvVGVlRGF0YVRhYmxlPjxU
        ZWVEYXRhVGFibGUgZGlmZmdyOmlkPSJUZWVEYXRhVGFibGUxOSIgbXNkYXRhOnJvd09yZGVyPSIxOCIg
        ZGlmZmdyOmhhc0NoYW5nZXM9Imluc2VydGVkIj48WD4xODwvWD48WT43MTM8L1k+PC9UZWVEYXRhVGFi
        bGU+PFRlZURhdGFUYWJsZSBkaWZmZ3I6aWQ9IlRlZURhdGFUYWJsZTIwIiBtc2RhdGE6cm93T3JkZXI9
        IjE5IiBkaWZmZ3I6aGFzQ2hhbmdlcz0iaW5zZXJ0ZWQiPjxYPjE5PC9YPjxZPjYxNDwvWT48L1RlZURh
        dGFUYWJsZT48VGVlRGF0YVRhYmxlIGRpZmZncjppZD0iVGVlRGF0YVRhYmxlMjEiIG1zZGF0YTpyb3dP
        cmRlcj0iMjAiIGRpZmZncjpoYXNDaGFuZ2VzPSJpbnNlcnRlZCI+PFg+MjA8L1g+PFk+NjYxPC9ZPjwv
        VGVlRGF0YVRhYmxlPjxUZWVEYXRhVGFibGUgZGlmZmdyOmlkPSJUZWVEYXRhVGFibGUyMiIgbXNkYXRh
        OnJvd09yZGVyPSIyMSIgZGlmZmdyOmhhc0NoYW5nZXM9Imluc2VydGVkIj48WD4yMTwvWD48WT41NTM8
        L1k+PC9UZWVEYXRhVGFibGU+PFRlZURhdGFUYWJsZSBkaWZmZ3I6aWQ9IlRlZURhdGFUYWJsZTIzIiBt
        c2RhdGE6cm93T3JkZXI9IjIyIiBkaWZmZ3I6aGFzQ2hhbmdlcz0iaW5zZXJ0ZWQiPjxYPjIyPC9YPjxZ
        PjU1NDwvWT48L1RlZURhdGFUYWJsZT48VGVlRGF0YVRhYmxlIGRpZmZncjppZD0iVGVlRGF0YVRhYmxl
        MjQiIG1zZGF0YTpyb3dPcmRlcj0iMjMiIGRpZmZncjpoYXNDaGFuZ2VzPSJpbnNlcnRlZCI+PFg+MjM8
        L1g+PFk+NDY5PC9ZPjwvVGVlRGF0YVRhYmxlPjxUZWVEYXRhVGFibGUgZGlmZmdyOmlkPSJUZWVEYXRh
        VGFibGUyNSIgbXNkYXRhOnJvd09yZGVyPSIyNCIgZGlmZmdyOmhhc0NoYW5nZXM9Imluc2VydGVkIj48
        WD4yNDwvWD48WT40ODQ8L1k+PC9UZWVEYXRhVGFibGU+PC9UZWVEYXRhU2V0PjwvZGlmZmdyOmRpZmZn
        cmFtPgQDAAAADlN5c3RlbS5WZXJzaW9uBAAAAAZfTWFqb3IGX01pbm9yBl9CdWlsZAlfUmV2aXNpb24A
        AAAACAgICAIAAAAAAAAA//////////8L
</value>
  </data>
  <metadata name="line5.TrayLocation" type="System.Drawing.Point, System.Drawing, Version=4.0.0.0, Culture=neutral, PublicKeyToken=b03f5f7f11d50a3a">
    <value>182, 275</value>
  </metadata>
  <data name="line5.DataSource" mimetype="application/x-microsoft.net.object.binary.base64">
    <value>
        AAEAAAD/////AQAAAAAAAAAMAgAAAE5TeXN0ZW0uRGF0YSwgVmVyc2lvbj00LjAuMC4wLCBDdWx0dXJl
        PW5ldXRyYWwsIFB1YmxpY0tleVRva2VuPWI3N2E1YzU2MTkzNGUwODkFAQAAABNTeXN0ZW0uRGF0YS5E
        YXRhU2V0AwAAABdEYXRhU2V0LlJlbW90aW5nVmVyc2lvbglYbWxTY2hlbWELWG1sRGlmZkdyYW0DAQEO
        U3lzdGVtLlZlcnNpb24CAAAACQMAAAAGBAAAAI4GPD94bWwgdmVyc2lvbj0iMS4wIiBlbmNvZGluZz0i
        dXRmLTE2Ij8+DQo8eHM6c2NoZW1hIGlkPSJUZWVEYXRhU2V0IiB4bWxucz0iIiB4bWxuczp4cz0iaHR0
        cDovL3d3dy53My5vcmcvMjAwMS9YTUxTY2hlbWEiIHhtbG5zOm1zZGF0YT0idXJuOnNjaGVtYXMtbWlj
        cm9zb2Z0LWNvbTp4bWwtbXNkYXRhIj4NCiAgPHhzOmVsZW1lbnQgbmFtZT0iVGVlRGF0YVNldCIgbXNk
        YXRhOklzRGF0YVNldD0idHJ1ZSIgbXNkYXRhOlVzZUN1cnJlbnRMb2NhbGU9InRydWUiPg0KICAgIDx4
        czpjb21wbGV4VHlwZT4NCiAgICAgIDx4czpjaG9pY2UgbWluT2NjdXJzPSIwIiBtYXhPY2N1cnM9InVu
        Ym91bmRlZCI+DQogICAgICAgIDx4czplbGVtZW50IG5hbWU9IlRlZURhdGFUYWJsZSI+DQogICAgICAg
        ICAgPHhzOmNvbXBsZXhUeXBlPg0KICAgICAgICAgICAgPHhzOnNlcXVlbmNlPg0KICAgICAgICAgICAg
        ICA8eHM6ZWxlbWVudCBuYW1lPSJYIiB0eXBlPSJ4czpkb3VibGUiIG1zZGF0YTp0YXJnZXROYW1lc3Bh
        Y2U9IiIgbWluT2NjdXJzPSIwIiAvPg0KICAgICAgICAgICAgICA8eHM6ZWxlbWVudCBuYW1lPSJZIiB0
        eXBlPSJ4czpkb3VibGUiIG1zZGF0YTp0YXJnZXROYW1lc3BhY2U9IiIgbWluT2NjdXJzPSIwIiAvPg0K
        ICAgICAgICAgICAgPC94czpzZXF1ZW5jZT4NCiAgICAgICAgICA8L3hzOmNvbXBsZXhUeXBlPg0KICAg
        ICAgICA8L3hzOmVsZW1lbnQ+DQogICAgICA8L3hzOmNob2ljZT4NCiAgICA8L3hzOmNvbXBsZXhUeXBl
        Pg0KICA8L3hzOmVsZW1lbnQ+DQo8L3hzOnNjaGVtYT4GBQAAAMEZPGRpZmZncjpkaWZmZ3JhbSB4bWxu
        czptc2RhdGE9InVybjpzY2hlbWFzLW1pY3Jvc29mdC1jb206eG1sLW1zZGF0YSIgeG1sbnM6ZGlmZmdy
        PSJ1cm46c2NoZW1hcy1taWNyb3NvZnQtY29tOnhtbC1kaWZmZ3JhbS12MSI+PFRlZURhdGFTZXQ+PFRl
        ZURhdGFUYWJsZSBkaWZmZ3I6aWQ9IlRlZURhdGFUYWJsZTEiIG1zZGF0YTpyb3dPcmRlcj0iMCIgZGlm
        ZmdyOmhhc0NoYW5nZXM9Imluc2VydGVkIj48WD4wPC9YPjxZPjU3NDwvWT48L1RlZURhdGFUYWJsZT48
        VGVlRGF0YVRhYmxlIGRpZmZncjppZD0iVGVlRGF0YVRhYmxlMiIgbXNkYXRhOnJvd09yZGVyPSIxIiBk
        aWZmZ3I6aGFzQ2hhbmdlcz0iaW5zZXJ0ZWQiPjxYPjE8L1g+PFk+NTkzPC9ZPjwvVGVlRGF0YVRhYmxl
        PjxUZWVEYXRhVGFibGUgZGlmZmdyOmlkPSJUZWVEYXRhVGFibGUzIiBtc2RhdGE6cm93T3JkZXI9IjIi
        IGRpZmZncjpoYXNDaGFuZ2VzPSJpbnNlcnRlZCI+PFg+MjwvWD48WT42Mjc8L1k+PC9UZWVEYXRhVGFi
        bGU+PFRlZURhdGFUYWJsZSBkaWZmZ3I6aWQ9IlRlZURhdGFUYWJsZTQiIG1zZGF0YTpyb3dPcmRlcj0i
        MyIgZGlmZmdyOmhhc0NoYW5nZXM9Imluc2VydGVkIj48WD4zPC9YPjxZPjY0NjwvWT48L1RlZURhdGFU
        YWJsZT48VGVlRGF0YVRhYmxlIGRpZmZncjppZD0iVGVlRGF0YVRhYmxlNSIgbXNkYXRhOnJvd09yZGVy
        PSI0IiBkaWZmZ3I6aGFzQ2hhbmdlcz0iaW5zZXJ0ZWQiPjxYPjQ8L1g+PFk+NjEyPC9ZPjwvVGVlRGF0
        YVRhYmxlPjxUZWVEYXRhVGFibGUgZGlmZmdyOmlkPSJUZWVEYXRhVGFibGU2IiBtc2RhdGE6cm93T3Jk
        ZXI9IjUiIGRpZmZncjpoYXNDaGFuZ2VzPSJpbnNlcnRlZCI+PFg+NTwvWD48WT41OTA8L1k+PC9UZWVE
        YXRhVGFibGU+PFRlZURhdGFUYWJsZSBkaWZmZ3I6aWQ9IlRlZURhdGFUYWJsZTciIG1zZGF0YTpyb3dP
        cmRlcj0iNiIgZGlmZmdyOmhhc0NoYW5nZXM9Imluc2VydGVkIj48WD42PC9YPjxZPjU1MjwvWT48L1Rl
        ZURhdGFUYWJsZT48VGVlRGF0YVRhYmxlIGRpZmZncjppZD0iVGVlRGF0YVRhYmxlOCIgbXNkYXRhOnJv
        d09yZGVyPSI3IiBkaWZmZ3I6aGFzQ2hhbmdlcz0iaW5zZXJ0ZWQiPjxYPjc8L1g+PFk+NTMxPC9ZPjwv
        VGVlRGF0YVRhYmxlPjxUZWVEYXRhVGFibGUgZGlmZmdyOmlkPSJUZWVEYXRhVGFibGU5IiBtc2RhdGE6
        cm93T3JkZXI9IjgiIGRpZmZncjpoYXNDaGFuZ2VzPSJpbnNlcnRlZCI+PFg+ODwvWD48WT40ODQ8L1k+
        PC9UZWVEYXRhVGFibGU+PFRlZURhdGFUYWJsZSBkaWZmZ3I6aWQ9IlRlZURhdGFUYWJsZTEwIiBtc2Rh
        dGE6cm93T3JkZXI9IjkiIGRpZmZncjpoYXNDaGFuZ2VzPSJpbnNlcnRlZCI+PFg+OTwvWD48WT40OTQ8
        L1k+PC9UZWVEYXRhVGFibGU+PFRlZURhdGFUYWJsZSBkaWZmZ3I6aWQ9IlRlZURhdGFUYWJsZTExIiBt
        c2RhdGE6cm93T3JkZXI9IjEwIiBkaWZmZ3I6aGFzQ2hhbmdlcz0iaW5zZXJ0ZWQiPjxYPjEwPC9YPjxZ
        PjU1MTwvWT48L1RlZURhdGFUYWJsZT48VGVlRGF0YVRhYmxlIGRpZmZncjppZD0iVGVlRGF0YVRhYmxl
        MTIiIG1zZGF0YTpyb3dPcmRlcj0iMTEiIGRpZmZncjpoYXNDaGFuZ2VzPSJpbnNlcnRlZCI+PFg+MTE8
        L1g+PFk+NTQwPC9ZPjwvVGVlRGF0YVRhYmxlPjxUZWVEYXRhVGFibGUgZGlmZmdyOmlkPSJUZWVEYXRh
        VGFibGUxMyIgbXNkYXRhOnJvd09yZGVyPSIxMiIgZGlmZmdyOmhhc0NoYW5nZXM9Imluc2VydGVkIj48
        WD4xMjwvWD48WT41MjQ8L1k+PC9UZWVEYXRhVGFibGU+PFRlZURhdGFUYWJsZSBkaWZmZ3I6aWQ9IlRl
        ZURhdGFUYWJsZTE0IiBtc2RhdGE6cm93T3JkZXI9IjEzIiBkaWZmZ3I6aGFzQ2hhbmdlcz0iaW5zZXJ0
        ZWQiPjxYPjEzPC9YPjxZPjUyMjwvWT48L1RlZURhdGFUYWJsZT48VGVlRGF0YVRhYmxlIGRpZmZncjpp
        ZD0iVGVlRGF0YVRhYmxlMTUiIG1zZGF0YTpyb3dPcmRlcj0iMTQiIGRpZmZncjpoYXNDaGFuZ2VzPSJp
        bnNlcnRlZCI+PFg+MTQ8L1g+PFk+NTU5PC9ZPjwvVGVlRGF0YVRhYmxlPjxUZWVEYXRhVGFibGUgZGlm
        ZmdyOmlkPSJUZWVEYXRhVGFibGUxNiIgbXNkYXRhOnJvd09yZGVyPSIxNSIgZGlmZmdyOmhhc0NoYW5n
        ZXM9Imluc2VydGVkIj48WD4xNTwvWD48WT42MDg8L1k+PC9UZWVEYXRhVGFibGU+PFRlZURhdGFUYWJs
        ZSBkaWZmZ3I6aWQ9IlRlZURhdGFUYWJsZTE3IiBtc2RhdGE6cm93T3JkZXI9IjE2IiBkaWZmZ3I6aGFz
        Q2hhbmdlcz0iaW5zZXJ0ZWQiPjxYPjE2PC9YPjxZPjU5NjwvWT48L1RlZURhdGFUYWJsZT48VGVlRGF0
        YVRhYmxlIGRpZmZncjppZD0iVGVlRGF0YVRhYmxlMTgiIG1zZGF0YTpyb3dPcmRlcj0iMTciIGRpZmZn
        cjpoYXNDaGFuZ2VzPSJpbnNlcnRlZCI+PFg+MTc8L1g+PFk+NTQxPC9ZPjwvVGVlRGF0YVRhYmxlPjxU
        ZWVEYXRhVGFibGUgZGlmZmdyOmlkPSJUZWVEYXRhVGFibGUxOSIgbXNkYXRhOnJvd09yZGVyPSIxOCIg
        ZGlmZmdyOmhhc0NoYW5nZXM9Imluc2VydGVkIj48WD4xODwvWD48WT41MDY8L1k+PC9UZWVEYXRhVGFi
        bGU+PFRlZURhdGFUYWJsZSBkaWZmZ3I6aWQ9IlRlZURhdGFUYWJsZTIwIiBtc2RhdGE6cm93T3JkZXI9
        IjE5IiBkaWZmZ3I6aGFzQ2hhbmdlcz0iaW5zZXJ0ZWQiPjxYPjE5PC9YPjxZPjU1OTwvWT48L1RlZURh
        dGFUYWJsZT48VGVlRGF0YVRhYmxlIGRpZmZncjppZD0iVGVlRGF0YVRhYmxlMjEiIG1zZGF0YTpyb3dP
        cmRlcj0iMjAiIGRpZmZncjpoYXNDaGFuZ2VzPSJpbnNlcnRlZCI+PFg+MjA8L1g+PFk+NTA0PC9ZPjwv
        VGVlRGF0YVRhYmxlPjxUZWVEYXRhVGFibGUgZGlmZmdyOmlkPSJUZWVEYXRhVGFibGUyMiIgbXNkYXRh
        OnJvd09yZGVyPSIyMSIgZGlmZmdyOmhhc0NoYW5nZXM9Imluc2VydGVkIj48WD4yMTwvWD48WT41MzQ8
        L1k+PC9UZWVEYXRhVGFibGU+PFRlZURhdGFUYWJsZSBkaWZmZ3I6aWQ9IlRlZURhdGFUYWJsZTIzIiBt
        c2RhdGE6cm93T3JkZXI9IjIyIiBkaWZmZ3I6aGFzQ2hhbmdlcz0iaW5zZXJ0ZWQiPjxYPjIyPC9YPjxZ
        PjUxNjwvWT48L1RlZURhdGFUYWJsZT48VGVlRGF0YVRhYmxlIGRpZmZncjppZD0iVGVlRGF0YVRhYmxl
        MjQiIG1zZGF0YTpyb3dPcmRlcj0iMjMiIGRpZmZncjpoYXNDaGFuZ2VzPSJpbnNlcnRlZCI+PFg+MjM8
        L1g+PFk+NTE1PC9ZPjwvVGVlRGF0YVRhYmxlPjxUZWVEYXRhVGFibGUgZGlmZmdyOmlkPSJUZWVEYXRh
        VGFibGUyNSIgbXNkYXRhOnJvd09yZGVyPSIyNCIgZGlmZmdyOmhhc0NoYW5nZXM9Imluc2VydGVkIj48
        WD4yNDwvWD48WT40NjE8L1k+PC9UZWVEYXRhVGFibGU+PC9UZWVEYXRhU2V0PjwvZGlmZmdyOmRpZmZn
        cmFtPgQDAAAADlN5c3RlbS5WZXJzaW9uBAAAAAZfTWFqb3IGX01pbm9yBl9CdWlsZAlfUmV2aXNpb24A
        AAAACAgICAIAAAAAAAAA//////////8L
</value>
  </data>
  <metadata name="line6.TrayLocation" type="System.Drawing.Point, System.Drawing, Version=4.0.0.0, Culture=neutral, PublicKeyToken=b03f5f7f11d50a3a">
    <value>534, 275</value>
  </metadata>
  <data name="line6.Colors" mimetype="application/x-microsoft.net.object.binary.base64">
    <value>
        AAEAAAD/////AQAAAAAAAAAMAgAAAEVUZWVDaGFydCwgVmVyc2lvbj00LjEuMjAxMC44MDQ2LCBDdWx0
        dXJlPW5ldXRyYWwsIFB1YmxpY0tleVRva2VuPW51bGwFAQAAACBTdGVlbWEuVGVlQ2hhcnQuU3R5bGVz
        LkNvbG9yTGlzdAQAAAAETmFtZRBBcnJheUxpc3QrX2l0ZW1zD0FycmF5TGlzdCtfc2l6ZRJBcnJheUxp
        c3QrX3ZlcnNpb24BBQAACAgCAAAABgMAAAAGQ29sb3JzCQQAAAAZAAAAGQAAABAEAAAAIAAAAAkFAAAA
        CQYAAAAJBwAAAAkIAAAACQkAAAAJCgAAAAkLAAAACQwAAAAJDQAAAAkOAAAACQ8AAAAJEAAAAAkRAAAA
        CRIAAAAJEwAAAAkUAAAACRUAAAAJFgAAAAkXAAAACRgAAAAJGQAAAAkaAAAACRsAAAAJHAAAAAkdAAAA
        DQcMHgAAAFFTeXN0ZW0uRHJhd2luZywgVmVyc2lvbj00LjAuMC4wLCBDdWx0dXJlPW5ldXRyYWwsIFB1
        YmxpY0tleVRva2VuPWIwM2Y1ZjdmMTFkNTBhM2EFBQAAABRTeXN0ZW0uRHJhd2luZy5Db2xvcgQAAAAE
        bmFtZQV2YWx1ZQprbm93bkNvbG9yBXN0YXRlAQAAAAkHBx4AAAAKAAAAAAAAAAAAAAAAAQYAAAAFAAAA
        CgAAAAAAAAAAAAAAAAEHAAAABQAAAAoAAAAAAAAAAAAAAAABCAAAAAUAAAAKAAAAAAAAAAAAAAAAAQkA
        AAAFAAAACgAAAAAAAAAAAAAAAAEKAAAABQAAAAoAAAAAAAAAAAAAAAABCwAAAAUAAAAKAAAAAAAAAAAA
        AAAAAQwAAAAFAAAACgAAAAAAAAAAAAAAAAENAAAABQAAAAoAAAAAAAAAAAAAAAABDgAAAAUAAAAKAAAA
        AAAAAAAAAAAAAQ8AAAAFAAAACgAAAAAAAAAAAAAAAAEQAAAABQAAAAoAAAAAAAAAAAAAAAABEQAAAAUA
        AAAKAAAAAAAAAAAAAAAAARIAAAAFAAAACgAAAAAAAAAAAAAAAAETAAAABQAAAAoAAAAAAAAAAAAAAAAB
        FAAAAAUAAAAKAAAAAAAAAAAAAAAAARUAAAAFAAAACgAAAAAAAAAAAAAAAAEWAAAABQAAAAoAAAAAAAAA
        AAAAAAABFwAAAAUAAAAKAAAAAAAAAAAAAAAAARgAAAAFAAAACgAAAAAAAAAAAAAAAAEZAAAABQAAAAoA
        AAAAAAAAAAAAAAABGgAAAAUAAAAKAAAAAAAAAAAAAAAAARsAAAAFAAAACgAAAAAAAAAAAAAAAAEcAAAA
        BQAAAAoAAAAAAAAAAAAAAAABHQAAAAUAAAAKAAAAAAAAAAAAAAAACw==
</value>
  </data>
  <metadata name="contextMenuStrip2.TrayLocation" type="System.Drawing.Point, System.Drawing, Version=4.0.0.0, Culture=neutral, PublicKeyToken=b03f5f7f11d50a3a">
    <value>17, 275</value>
  </metadata>
  <metadata name="line8.TrayLocation" type="System.Drawing.Point, System.Drawing, Version=4.0.0.0, Culture=neutral, PublicKeyToken=b03f5f7f11d50a3a">
    <value>446, 275</value>
  </metadata>
  <metadata name="$this.TrayHeight" type="System.Int32, mscorlib, Version=4.0.0.0, Culture=neutral, PublicKeyToken=b77a5c561934e089">
    <value>25</value>
  </metadata>
</root>
