# Supplementary material
Source: MDPI journal article supplement (https://www.mdpi.com/2077-1312/10/8/1051)
Supplement: s1 [file s1 › OSNSystem/OSNSystem/OSNSystem/obj/x86/Debug/OSNSystem.csproj.CoreCompileInputs.cache]

a42598e0bb256f78ad2a7e6d76427884850fada2
