# Supplementary material
Source: MDPI journal article supplement (https://www.mdpi.com/2077-1312/10/8/1051)
Supplement: s1 [file s1 › OSNSystem/OSNSystem/OSNSystem/obj/x86/Debug/OSNSystem.csproj.FileListAbsolute.txt]

D:\work\海底观测网项目\863\2016\OSNSystem\OSNSystem\bin\Debug\OSNSystem.exe
D:\work\海底观测网项目\863\2016\OSNSystem\OSNSystem\bin\Debug\OSNSystem.pdb
D:\work\海底观测网项目\863\2016\OSNSystem\OSNSystem\obj\x86\Debug\OSNSystem.Main.resources
D:\work\海底观测网项目\863\2016\OSNSystem\OSNSystem\obj\x86\Debug\OSNSystem.Properties.Resources.resources
D:\work\海底观测网项目\863\2016\OSNSystem\OSNSystem\obj\x86\Debug\OSNSystem.csproj.GenerateResource.Cache
D:\work\海底观测网项目\863\2016\OSNSystem\OSNSystem\obj\x86\Debug\OSNSystem.exe
D:\work\海底观测网项目\863\2016\OSNSystem\OSNSystem\obj\x86\Debug\OSNSystem.pdb
D:\work\海底观测网项目\863\2016\OSNSystem\OSNSystem\obj\x86\Debug\OSNSystem.csprojResolveAssemblyReference.cache
D:\work\海底观测网项目\863\2016\OSNSystem\OSNSystem\obj\x86\Debug\OSNSystem.commandAdd.resources
D:\work\海底观测网项目\863\2016\OSNSystem\OSNSystem\bin\Debug\OSNSystem.exe.config
D:\work\海底观测网项目\863\2016\OSNSystem\OSNSystem\bin\Debug\TeeChart.dll
D:\work\海底观测网项目\863\2016\OSNSystem\OSNSystem\bin\Debug\TeeChart.xml
D:\work\海底观测网项目\863\2016\OSNSystem\OSNSystem\bin\Debug\mysql.data.dll
G:\1.xiangmu\OSNSystem\OSNSystem\bin\Debug\OSNSystem.exe.config
G:\1.xiangmu\OSNSystem\OSNSystem\obj\x86\Debug\OSNSystem.exe
G:\1.xiangmu\OSNSystem\OSNSystem\obj\x86\Debug\OSNSystem.pdb
G:\1.xiangmu\OSNSystem\OSNSystem\bin\Debug\OSNSystem.exe
G:\1.xiangmu\OSNSystem\OSNSystem\bin\Debug\OSNSystem.pdb
G:\1.xiangmu\OSNSystem\OSNSystem\bin\Debug\mysql.data.dll
G:\1.xiangmu\OSNSystem\OSNSystem\bin\Debug\TeeChart.dll
G:\1.xiangmu\OSNSystem\OSNSystem\bin\Debug\TeeChart.xml
G:\1.xiangmu\OSNSystem\OSNSystem\obj\x86\Debug\ResolveAssemblyReference.cache
G:\1.xiangmu\OSNSystem\OSNSystem\obj\x86\Debug\OSNSystem.commandAdd.resources
G:\1.xiangmu\OSNSystem\OSNSystem\obj\x86\Debug\OSNSystem.Main.resources
G:\1.xiangmu\OSNSystem\OSNSystem\obj\x86\Debug\OSNSystem.Properties.Resources.resources
G:\1.xiangmu\OSNSystem\OSNSystem\obj\x86\Debug\GenerateResource.read.1.tlog
G:\1.xiangmu\OSNSystem\OSNSystem\obj\x86\Debug\GenerateResource.write.1.tlog
G:\1.xiangmu\4.先解析再判断错误\OSNSystem\OSNSystem\bin\Debug\OSNSystem.exe.config
G:\1.xiangmu\4.先解析再判断错误\OSNSystem\OSNSystem\obj\x86\Debug\OSNSystem.exe
G:\1.xiangmu\4.先解析再判断错误\OSNSystem\OSNSystem\obj\x86\Debug\OSNSystem.pdb
G:\1.xiangmu\4.先解析再判断错误\OSNSystem\OSNSystem\bin\Debug\OSNSystem.exe
G:\1.xiangmu\4.先解析再判断错误\OSNSystem\OSNSystem\bin\Debug\OSNSystem.pdb
G:\1.xiangmu\4.先解析再判断错误\OSNSystem\OSNSystem\bin\Debug\mysql.data.dll
G:\1.xiangmu\4.先解析再判断错误\OSNSystem\OSNSystem\bin\Debug\TeeChart.dll
G:\1.xiangmu\4.先解析再判断错误\OSNSystem\OSNSystem\bin\Debug\TeeChart.xml
G:\1.xiangmu\4.先解析再判断错误\OSNSystem\OSNSystem\obj\x86\Debug\ResolveAssemblyReference.cache
G:\1.xiangmu\4.先解析再判断错误\OSNSystem\OSNSystem\obj\x86\Debug\OSNSystem.commandAdd.resources
G:\1.xiangmu\4.先解析再判断错误\OSNSystem\OSNSystem\obj\x86\Debug\OSNSystem.Main.resources
G:\1.xiangmu\4.先解析再判断错误\OSNSystem\OSNSystem\obj\x86\Debug\OSNSystem.Properties.Resources.resources
G:\1.xiangmu\4.先解析再判断错误\OSNSystem\OSNSystem\obj\x86\Debug\GenerateResource.read.1.tlog
G:\1.xiangmu\4.先解析再判断错误\OSNSystem\OSNSystem\obj\x86\Debug\GenerateResource.write.1.tlog
G:\1.xiangmu\5.按照组长要求更改\OSNSystem\OSNSystem\bin\Debug\OSNSystem.exe.config
G:\1.xiangmu\5.按照组长要求更改\OSNSystem\OSNSystem\obj\x86\Debug\OSNSystem.exe
G:\1.xiangmu\5.按照组长要求更改\OSNSystem\OSNSystem\obj\x86\Debug\OSNSystem.pdb
G:\1.xiangmu\5.按照组长要求更改\OSNSystem\OSNSystem\bin\Debug\OSNSystem.exe
G:\1.xiangmu\5.按照组长要求更改\OSNSystem\OSNSystem\bin\Debug\OSNSystem.pdb
G:\1.xiangmu\5.按照组长要求更改\OSNSystem\OSNSystem\bin\Debug\mysql.data.dll
G:\1.xiangmu\5.按照组长要求更改\OSNSystem\OSNSystem\bin\Debug\TeeChart.dll
G:\1.xiangmu\5.按照组长要求更改\OSNSystem\OSNSystem\bin\Debug\TeeChart.xml
G:\1.xiangmu\5.按照组长要求更改\OSNSystem\OSNSystem\obj\x86\Debug\ResolveAssemblyReference.cache
G:\1.xiangmu\5.按照组长要求更改\OSNSystem\OSNSystem\obj\x86\Debug\OSNSystem.commandAdd.resources
G:\1.xiangmu\5.按照组长要求更改\OSNSystem\OSNSystem\obj\x86\Debug\OSNSystem.Main.resources
G:\1.xiangmu\5.按照组长要求更改\OSNSystem\OSNSystem\obj\x86\Debug\OSNSystem.Properties.Resources.resources
G:\1.xiangmu\5.按照组长要求更改\OSNSystem\OSNSystem\obj\x86\Debug\GenerateResource.read.1.tlog
G:\1.xiangmu\5.按照组长要求更改\OSNSystem\OSNSystem\obj\x86\Debug\GenerateResource.write.1.tlog
G:\1.xiangmu\6.模块化更改\OSNSystem\OSNSystem\bin\Debug\OSNSystem.exe.config
G:\1.xiangmu\6.模块化更改\OSNSystem\OSNSystem\obj\x86\Debug\OSNSystem.exe
G:\1.xiangmu\6.模块化更改\OSNSystem\OSNSystem\obj\x86\Debug\OSNSystem.pdb
G:\1.xiangmu\6.模块化更改\OSNSystem\OSNSystem\bin\Debug\OSNSystem.exe
G:\1.xiangmu\6.模块化更改\OSNSystem\OSNSystem\bin\Debug\OSNSystem.pdb
G:\1.xiangmu\6.模块化更改\OSNSystem\OSNSystem\bin\Debug\mysql.data.dll
G:\1.xiangmu\6.模块化更改\OSNSystem\OSNSystem\bin\Debug\TeeChart.dll
G:\1.xiangmu\6.模块化更改\OSNSystem\OSNSystem\bin\Debug\TeeChart.xml
G:\1.xiangmu\6.模块化更改\OSNSystem\OSNSystem\obj\x86\Debug\ResolveAssemblyReference.cache
G:\1.xiangmu\6.模块化更改\OSNSystem\OSNSystem\obj\x86\Debug\OSNSystem.commandAdd.resources
G:\1.xiangmu\6.模块化更改\OSNSystem\OSNSystem\obj\x86\Debug\OSNSystem.Main.resources
G:\1.xiangmu\6.模块化更改\OSNSystem\OSNSystem\obj\x86\Debug\OSNSystem.Properties.Resources.resources
G:\1.xiangmu\6.模块化更改\OSNSystem\OSNSystem\obj\x86\Debug\GenerateResource.read.1.tlog
G:\1.xiangmu\6.模块化更改\OSNSystem\OSNSystem\obj\x86\Debug\GenerateResource.write.1.tlog
G:\1.xiangmu\7.summary\1.解析-存储\OSNSystem\OSNSystem\bin\Debug\OSNSystem.exe.config
G:\1.xiangmu\7.summary\1.解析-存储\OSNSystem\OSNSystem\obj\x86\Debug\OSNSystem.exe
G:\1.xiangmu\7.summary\1.解析-存储\OSNSystem\OSNSystem\obj\x86\Debug\OSNSystem.pdb
G:\1.xiangmu\7.summary\1.解析-存储\OSNSystem\OSNSystem\bin\Debug\OSNSystem.exe
G:\1.xiangmu\7.summary\1.解析-存储\OSNSystem\OSNSystem\bin\Debug\OSNSystem.pdb
G:\1.xiangmu\7.summary\1.解析-存储\OSNSystem\OSNSystem\bin\Debug\mysql.data.dll
G:\1.xiangmu\7.summary\1.解析-存储\OSNSystem\OSNSystem\bin\Debug\TeeChart.dll
G:\1.xiangmu\7.summary\1.解析-存储\OSNSystem\OSNSystem\bin\Debug\TeeChart.xml
G:\1.xiangmu\7.summary\1.解析-存储\OSNSystem\OSNSystem\obj\x86\Debug\ResolveAssemblyReference.cache
G:\1.xiangmu\7.summary\1.解析-存储\OSNSystem\OSNSystem\obj\x86\Debug\OSNSystem.commandAdd.resources
G:\1.xiangmu\7.summary\1.解析-存储\OSNSystem\OSNSystem\obj\x86\Debug\OSNSystem.Main.resources
G:\1.xiangmu\7.summary\1.解析-存储\OSNSystem\OSNSystem\obj\x86\Debug\OSNSystem.Properties.Resources.resources
G:\1.xiangmu\7.summary\1.解析-存储\OSNSystem\OSNSystem\obj\x86\Debug\GenerateResource.read.1.tlog
G:\1.xiangmu\7.summary\1.解析-存储\OSNSystem\OSNSystem\obj\x86\Debug\GenerateResource.write.1.tlog
E:\OSNSystem\OSNSystem\bin\Debug\OSNSystem.exe.config
E:\OSNSystem\OSNSystem\obj\x86\Debug\OSNSystem.exe
E:\OSNSystem\OSNSystem\obj\x86\Debug\OSNSystem.pdb
E:\OSNSystem\OSNSystem\bin\Debug\OSNSystem.exe
E:\OSNSystem\OSNSystem\bin\Debug\OSNSystem.pdb
E:\OSNSystem\OSNSystem\bin\Debug\mysql.data.dll
E:\OSNSystem\OSNSystem\bin\Debug\TeeChart.dll
E:\OSNSystem\OSNSystem\bin\Debug\TeeChart.xml
E:\OSNSystem\OSNSystem\obj\x86\Debug\ResolveAssemblyReference.cache
E:\OSNSystem\OSNSystem\obj\x86\Debug\OSNSystem.commandAdd.resources
E:\OSNSystem\OSNSystem\obj\x86\Debug\OSNSystem.Main.resources
E:\OSNSystem\OSNSystem\obj\x86\Debug\OSNSystem.Properties.Resources.resources
E:\OSNSystem\OSNSystem\obj\x86\Debug\GenerateResource.read.1.tlog
E:\OSNSystem\OSNSystem\obj\x86\Debug\GenerateResource.write.1.tlog
E:\OSNSystem\OSNSystem\obj\x86\Debug\OSNSystem.cmdSet.resources
C:\Users\Administrator\Desktop\重新绘图\OSNSystem\OSNSystem\bin\Debug\OSNSystem.exe.config
C:\Users\Administrator\Desktop\重新绘图\OSNSystem\OSNSystem\obj\x86\Debug\OSNSystem.exe
C:\Users\Administrator\Desktop\重新绘图\OSNSystem\OSNSystem\obj\x86\Debug\OSNSystem.pdb
C:\Users\Administrator\Desktop\重新绘图\OSNSystem\OSNSystem\bin\Debug\OSNSystem.exe
C:\Users\Administrator\Desktop\重新绘图\OSNSystem\OSNSystem\bin\Debug\OSNSystem.pdb
C:\Users\Administrator\Desktop\重新绘图\OSNSystem\OSNSystem\bin\Debug\mysql.data.dll
C:\Users\Administrator\Desktop\重新绘图\OSNSystem\OSNSystem\bin\Debug\TeeChart.dll
C:\Users\Administrator\Desktop\重新绘图\OSNSystem\OSNSystem\bin\Debug\TeeChart.xml
C:\Users\Administrator\Desktop\重新绘图\OSNSystem\OSNSystem\obj\x86\Debug\ResolveAssemblyReference.cache
C:\Users\Administrator\Desktop\重新绘图\OSNSystem\OSNSystem\obj\x86\Debug\OSNSystem.cmdSet.resources
C:\Users\Administrator\Desktop\重新绘图\OSNSystem\OSNSystem\obj\x86\Debug\OSNSystem.commandAdd.resources
C:\Users\Administrator\Desktop\重新绘图\OSNSystem\OSNSystem\obj\x86\Debug\OSNSystem.Main.resources
C:\Users\Administrator\Desktop\重新绘图\OSNSystem\OSNSystem\obj\x86\Debug\OSNSystem.Properties.Resources.resources
C:\Users\Administrator\Desktop\重新绘图\OSNSystem\OSNSystem\obj\x86\Debug\GenerateResource.read.1.tlog
C:\Users\Administrator\Desktop\重新绘图\OSNSystem\OSNSystem\obj\x86\Debug\GenerateResource.write.1.tlog
C:\Users\Administrator\Desktop\重新绘图\backup\15.socket长+画图+首页配置+反馈更改+处理函数更改+指令下达更改\OSNSystem\OSNSystem\bin\Debug\OSNSystem.exe.config
C:\Users\Administrator\Desktop\重新绘图\backup\15.socket长+画图+首页配置+反馈更改+处理函数更改+指令下达更改\OSNSystem\OSNSystem\obj\x86\Debug\OSNSystem.exe
C:\Users\Administrator\Desktop\重新绘图\backup\15.socket长+画图+首页配置+反馈更改+处理函数更改+指令下达更改\OSNSystem\OSNSystem\obj\x86\Debug\OSNSystem.pdb
C:\Users\Administrator\Desktop\重新绘图\backup\OSNSystem\OSNSystem\bin\Debug\OSNSystem.exe.config
C:\Users\Administrator\Desktop\重新绘图\backup\OSNSystem\OSNSystem\obj\x86\Debug\OSNSystem.exe
C:\Users\Administrator\Desktop\重新绘图\backup\OSNSystem\OSNSystem\obj\x86\Debug\OSNSystem.pdb
C:\Users\Administrator\Desktop\重新绘图\backup\OSNSystem\OSNSystem\bin\Debug\OSNSystem.exe
C:\Users\Administrator\Desktop\重新绘图\backup\OSNSystem\OSNSystem\bin\Debug\OSNSystem.pdb
C:\Users\Administrator\Desktop\重新绘图\backup\OSNSystem\OSNSystem\bin\Debug\mysql.data.dll
C:\Users\Administrator\Desktop\重新绘图\backup\OSNSystem\OSNSystem\bin\Debug\TeeChart.dll
C:\Users\Administrator\Desktop\重新绘图\backup\OSNSystem\OSNSystem\bin\Debug\TeeChart.xml
C:\Users\Administrator\Desktop\重新绘图\backup\OSNSystem\OSNSystem\obj\x86\Debug\ResolveAssemblyReference.cache
C:\Users\Administrator\Desktop\重新绘图\backup\OSNSystem\OSNSystem\obj\x86\Debug\OSNSystem.cmdSet.resources
C:\Users\Administrator\Desktop\重新绘图\backup\OSNSystem\OSNSystem\obj\x86\Debug\OSNSystem.commandAdd.resources
C:\Users\Administrator\Desktop\重新绘图\backup\OSNSystem\OSNSystem\obj\x86\Debug\OSNSystem.Main.resources
C:\Users\Administrator\Desktop\重新绘图\backup\OSNSystem\OSNSystem\obj\x86\Debug\OSNSystem.Properties.Resources.resources
C:\Users\Administrator\Desktop\重新绘图\backup\OSNSystem\OSNSystem\obj\x86\Debug\GenerateResource.read.1.tlog
C:\Users\Administrator\Desktop\重新绘图\backup\OSNSystem\OSNSystem\obj\x86\Debug\GenerateResource.write.1.tlog
G:\1.xiangmu\OSNSystem\OSNSystem\obj\x86\Debug\OSNSystem.cmdSet.resources
G:\1.xiangmu\OSNSystem\OSNSystem\obj\x86\Debug\OSNSystem.SetDO.resources
C:\Users\Administrator\Desktop\OSNSystem\OSNSystem\bin\Debug\OSNSystem.exe.config
C:\Users\Administrator\Desktop\OSNSystem\OSNSystem\obj\x86\Debug\OSNSystem.exe
C:\Users\Administrator\Desktop\OSNSystem\OSNSystem\obj\x86\Debug\OSNSystem.pdb
C:\Users\Administrator\Desktop\OSNSystem\OSNSystem\bin\Debug\OSNSystem.exe
C:\Users\Administrator\Desktop\OSNSystem\OSNSystem\bin\Debug\OSNSystem.pdb
C:\Users\Administrator\Desktop\OSNSystem\OSNSystem\bin\Debug\mysql.data.dll
C:\Users\Administrator\Desktop\OSNSystem\OSNSystem\bin\Debug\TeeChart.dll
C:\Users\Administrator\Desktop\OSNSystem\OSNSystem\bin\Debug\TeeChart.xml
C:\Users\Administrator\Desktop\OSNSystem\OSNSystem\obj\x86\Debug\ResolveAssemblyReference.cache
C:\Users\Administrator\Desktop\OSNSystem\OSNSystem\obj\x86\Debug\OSNSystem.cmdSet.resources
C:\Users\Administrator\Desktop\OSNSystem\OSNSystem\obj\x86\Debug\OSNSystem.commandAdd.resources
C:\Users\Administrator\Desktop\OSNSystem\OSNSystem\obj\x86\Debug\OSNSystem.Main.resources
C:\Users\Administrator\Desktop\OSNSystem\OSNSystem\obj\x86\Debug\OSNSystem.Properties.Resources.resources
C:\Users\Administrator\Desktop\OSNSystem\OSNSystem\obj\x86\Debug\OSNSystem.SetDO.resources
C:\Users\Administrator\Desktop\OSNSystem\OSNSystem\obj\x86\Debug\GenerateResource.read.1.tlog
C:\Users\Administrator\Desktop\OSNSystem\OSNSystem\obj\x86\Debug\GenerateResource.write.1.tlog
D:\0.shangweiji\OSNSystem\OSNSystem\bin\Debug\OSNSystem.exe.config
D:\0.shangweiji\OSNSystem\OSNSystem\obj\x86\Debug\OSNSystem.exe
D:\0.shangweiji\OSNSystem\OSNSystem\obj\x86\Debug\OSNSystem.pdb
D:\0.shangweiji\OSNSystem\OSNSystem\bin\Debug\OSNSystem.exe
D:\0.shangweiji\OSNSystem\OSNSystem\bin\Debug\OSNSystem.pdb
D:\0.shangweiji\OSNSystem\OSNSystem\bin\Debug\mysql.data.dll
D:\0.shangweiji\OSNSystem\OSNSystem\bin\Debug\TeeChart.dll
D:\0.shangweiji\OSNSystem\OSNSystem\bin\Debug\TeeChart.xml
D:\0.shangweiji\OSNSystem\OSNSystem\obj\x86\Debug\ResolveAssemblyReference.cache
D:\0.shangweiji\OSNSystem\OSNSystem\obj\x86\Debug\OSNSystem.cmdSet.resources
D:\0.shangweiji\OSNSystem\OSNSystem\obj\x86\Debug\OSNSystem.commandAdd.resources
D:\0.shangweiji\OSNSystem\OSNSystem\obj\x86\Debug\OSNSystem.Main.resources
D:\0.shangweiji\OSNSystem\OSNSystem\obj\x86\Debug\OSNSystem.Properties.Resources.resources
D:\0.shangweiji\OSNSystem\OSNSystem\obj\x86\Debug\OSNSystem.SetDO.resources
D:\0.shangweiji\OSNSystem\OSNSystem\obj\x86\Debug\GenerateResource.read.1.tlog
D:\0.shangweiji\OSNSystem\OSNSystem\obj\x86\Debug\GenerateResource.write.1.tlog
C:\Users\Administrator\Desktop\0.shangweiji\OSNSystem\OSNSystem\bin\Debug\OSNSystem.exe.config
C:\Users\Administrator\Desktop\0.shangweiji\OSNSystem\OSNSystem\obj\x86\Debug\OSNSystem.exe
C:\Users\Administrator\Desktop\0.shangweiji\OSNSystem\OSNSystem\obj\x86\Debug\OSNSystem.pdb
C:\Users\Administrator\Desktop\0.shangweiji\OSNSystem\OSNSystem\bin\Debug\OSNSystem.exe
C:\Users\Administrator\Desktop\0.shangweiji\OSNSystem\OSNSystem\bin\Debug\OSNSystem.pdb
C:\Users\Administrator\Desktop\0.shangweiji\OSNSystem\OSNSystem\bin\Debug\mysql.data.dll
C:\Users\Administrator\Desktop\0.shangweiji\OSNSystem\OSNSystem\bin\Debug\TeeChart.dll
C:\Users\Administrator\Desktop\0.shangweiji\OSNSystem\OSNSystem\bin\Debug\TeeChart.xml
C:\Users\Administrator\Desktop\0.shangweiji\OSNSystem\OSNSystem\obj\x86\Debug\ResolveAssemblyReference.cache
C:\Users\Administrator\Desktop\0.shangweiji\OSNSystem\OSNSystem\obj\x86\Debug\OSNSystem.cmdSet.resources
C:\Users\Administrator\Desktop\0.shangweiji\OSNSystem\OSNSystem\obj\x86\Debug\OSNSystem.commandAdd.resources
C:\Users\Administrator\Desktop\0.shangweiji\OSNSystem\OSNSystem\obj\x86\Debug\OSNSystem.Main.resources
C:\Users\Administrator\Desktop\0.shangweiji\OSNSystem\OSNSystem\obj\x86\Debug\OSNSystem.Properties.Resources.resources
C:\Users\Administrator\Desktop\0.shangweiji\OSNSystem\OSNSystem\obj\x86\Debug\OSNSystem.SetDO.resources
C:\Users\Administrator\Desktop\0.shangweiji\OSNSystem\OSNSystem\obj\x86\Debug\GenerateResource.read.1.tlog
C:\Users\Administrator\Desktop\0.shangweiji\OSNSystem\OSNSystem\obj\x86\Debug\GenerateResource.write.1.tlog
C:\Users\Administrator\Desktop\0.shangweiji_new\OSNSystem\OSNSystem\bin\Debug\OSNSystem.exe.config
C:\Users\Administrator\Desktop\0.shangweiji_new\OSNSystem\OSNSystem\obj\x86\Debug\OSNSystem.exe
C:\Users\Administrator\Desktop\0.shangweiji_new\OSNSystem\OSNSystem\obj\x86\Debug\OSNSystem.pdb
C:\Users\Administrator\Desktop\0.shangweiji_new\OSNSystem\OSNSystem\bin\Debug\OSNSystem.exe
C:\Users\Administrator\Desktop\0.shangweiji_new\OSNSystem\OSNSystem\bin\Debug\OSNSystem.pdb
C:\Users\Administrator\Desktop\0.shangweiji_new\OSNSystem\OSNSystem\bin\Debug\mysql.data.dll
C:\Users\Administrator\Desktop\0.shangweiji_new\OSNSystem\OSNSystem\bin\Debug\TeeChart.dll
C:\Users\Administrator\Desktop\0.shangweiji_new\OSNSystem\OSNSystem\bin\Debug\TeeChart.xml
C:\Users\Administrator\Desktop\0.shangweiji_new\OSNSystem\OSNSystem\obj\x86\Debug\OSNSystem.cmdSet.resources
C:\Users\Administrator\Desktop\0.shangweiji_new\OSNSystem\OSNSystem\obj\x86\Debug\OSNSystem.commandAdd.resources
C:\Users\Administrator\Desktop\0.shangweiji_new\OSNSystem\OSNSystem\obj\x86\Debug\OSNSystem.Main.resources
C:\Users\Administrator\Desktop\0.shangweiji_new\OSNSystem\OSNSystem\obj\x86\Debug\OSNSystem.Properties.Resources.resources
C:\Users\Administrator\Desktop\0.shangweiji_new\OSNSystem\OSNSystem\obj\x86\Debug\OSNSystem.SetDO.resources
C:\Users\Administrator\Desktop\0.shangweiji_new\OSNSystem\OSNSystem\obj\x86\Debug\OSNSystem.csprojResolveAssemblyReference.cache
C:\Users\Administrator\Desktop\0.shangweiji_new\OSNSystem\OSNSystem\obj\x86\Debug\OSNSystem.csproj.GenerateResource.Cache
C:\Users\Administrator\Desktop\monitor\0.shangweiji_new\OSNSystem\OSNSystem\bin\Debug\OSNSystem.exe.config
C:\Users\Administrator\Desktop\monitor\0.shangweiji_new\OSNSystem\OSNSystem\obj\x86\Debug\OSNSystem.exe
C:\Users\Administrator\Desktop\monitor\0.shangweiji_new\OSNSystem\OSNSystem\obj\x86\Debug\OSNSystem.pdb
C:\Users\Administrator\Desktop\monitor\0.shangweiji_new\OSNSystem\OSNSystem\bin\Debug\OSNSystem.exe
C:\Users\Administrator\Desktop\monitor\0.shangweiji_new\OSNSystem\OSNSystem\bin\Debug\OSNSystem.pdb
C:\Users\Administrator\Desktop\monitor\0.shangweiji_new\OSNSystem\OSNSystem\bin\Debug\mysql.data.dll
C:\Users\Administrator\Desktop\monitor\0.shangweiji_new\OSNSystem\OSNSystem\bin\Debug\TeeChart.dll
C:\Users\Administrator\Desktop\monitor\0.shangweiji_new\OSNSystem\OSNSystem\bin\Debug\TeeChart.xml
C:\Users\Administrator\Desktop\monitor\0.shangweiji_new\OSNSystem\OSNSystem\obj\x86\Debug\ResolveAssemblyReference.cache
C:\Users\Administrator\Desktop\monitor\0.shangweiji_new\OSNSystem\OSNSystem\obj\x86\Debug\OSNSystem.cmdSet.resources
C:\Users\Administrator\Desktop\monitor\0.shangweiji_new\OSNSystem\OSNSystem\obj\x86\Debug\OSNSystem.commandAdd.resources
C:\Users\Administrator\Desktop\monitor\0.shangweiji_new\OSNSystem\OSNSystem\obj\x86\Debug\OSNSystem.Main.resources
C:\Users\Administrator\Desktop\monitor\0.shangweiji_new\OSNSystem\OSNSystem\obj\x86\Debug\OSNSystem.Properties.Resources.resources
C:\Users\Administrator\Desktop\monitor\0.shangweiji_new\OSNSystem\OSNSystem\obj\x86\Debug\OSNSystem.SetDO.resources
C:\Users\Administrator\Desktop\monitor\0.shangweiji_new\OSNSystem\OSNSystem\obj\x86\Debug\GenerateResource.read.1.tlog
C:\Users\Administrator\Desktop\monitor\0.shangweiji_new\OSNSystem\OSNSystem\obj\x86\Debug\GenerateResource.write.1.tlog
C:\Users\Administrator\Desktop\new_monitor\OSNSystem\OSNSystem\bin\Debug\OSNSystem.exe.config
C:\Users\Administrator\Desktop\new_monitor\OSNSystem\OSNSystem\obj\x86\Debug\OSNSystem.exe
C:\Users\Administrator\Desktop\new_monitor\OSNSystem\OSNSystem\obj\x86\Debug\OSNSystem.pdb
C:\Users\Administrator\Desktop\new_monitor\OSNSystem\OSNSystem\bin\Debug\OSNSystem.exe
C:\Users\Administrator\Desktop\new_monitor\OSNSystem\OSNSystem\bin\Debug\OSNSystem.pdb
C:\Users\Administrator\Desktop\new_monitor\OSNSystem\OSNSystem\bin\Debug\mysql.data.dll
C:\Users\Administrator\Desktop\new_monitor\OSNSystem\OSNSystem\bin\Debug\TeeChart.dll
C:\Users\Administrator\Desktop\new_monitor\OSNSystem\OSNSystem\bin\Debug\TeeChart.xml
C:\Users\Administrator\Desktop\new_monitor\OSNSystem\OSNSystem\obj\x86\Debug\ResolveAssemblyReference.cache
C:\Users\Administrator\Desktop\new_monitor\OSNSystem\OSNSystem\obj\x86\Debug\OSNSystem.cmdSet.resources
C:\Users\Administrator\Desktop\new_monitor\OSNSystem\OSNSystem\obj\x86\Debug\OSNSystem.commandAdd.resources
C:\Users\Administrator\Desktop\new_monitor\OSNSystem\OSNSystem\obj\x86\Debug\OSNSystem.Main.resources
C:\Users\Administrator\Desktop\new_monitor\OSNSystem\OSNSystem\obj\x86\Debug\OSNSystem.Properties.Resources.resources
C:\Users\Administrator\Desktop\new_monitor\OSNSystem\OSNSystem\obj\x86\Debug\OSNSystem.SetDO.resources
C:\Users\Administrator\Desktop\new_monitor\OSNSystem\OSNSystem\obj\x86\Debug\GenerateResource.read.1.tlog
C:\Users\Administrator\Desktop\new_monitor\OSNSystem\OSNSystem\obj\x86\Debug\GenerateResource.write.1.tlog
C:\0.Monitor_test\new_monitor\OSNSystem\OSNSystem\bin\Debug\OSNSystem.exe.config
C:\0.Monitor_test\new_monitor\OSNSystem\OSNSystem\obj\x86\Debug\OSNSystem.exe
C:\0.Monitor_test\new_monitor\OSNSystem\OSNSystem\obj\x86\Debug\OSNSystem.pdb
C:\0.Monitor_test\new_monitor\OSNSystem\OSNSystem\bin\Debug\OSNSystem.exe
C:\0.Monitor_test\new_monitor\OSNSystem\OSNSystem\bin\Debug\OSNSystem.pdb
C:\0.Monitor_test\new_monitor\OSNSystem\OSNSystem\bin\Debug\mysql.data.dll
C:\0.Monitor_test\new_monitor\OSNSystem\OSNSystem\bin\Debug\TeeChart.dll
C:\0.Monitor_test\new_monitor\OSNSystem\OSNSystem\bin\Debug\TeeChart.xml
C:\0.Monitor_test\new_monitor\OSNSystem\OSNSystem\obj\x86\Debug\OSNSystem.csprojResolveAssemblyReference.cache
C:\0.Monitor_test\new_monitor\OSNSystem\OSNSystem\obj\x86\Debug\OSNSystem.cmdSet.resources
C:\0.Monitor_test\new_monitor\OSNSystem\OSNSystem\obj\x86\Debug\OSNSystem.commandAdd.resources
C:\0.Monitor_test\new_monitor\OSNSystem\OSNSystem\obj\x86\Debug\OSNSystem.Main.resources
C:\0.Monitor_test\new_monitor\OSNSystem\OSNSystem\obj\x86\Debug\OSNSystem.Properties.Resources.resources
C:\0.Monitor_test\new_monitor\OSNSystem\OSNSystem\obj\x86\Debug\OSNSystem.SetDO.resources
C:\0.Monitor_test\new_monitor\OSNSystem\OSNSystem\obj\x86\Debug\OSNSystem.csproj.GenerateResource.Cache
C:\0.Monitor_test\1000点\OSNSystem\OSNSystem\bin\Debug\OSNSystem.exe.config
C:\0.Monitor_test\1000点\OSNSystem\OSNSystem\obj\x86\Debug\OSNSystem.exe
C:\0.Monitor_test\1000点\OSNSystem\OSNSystem\obj\x86\Debug\OSNSystem.pdb
C:\0.Monitor_test\1000点\OSNSystem\OSNSystem\bin\Debug\OSNSystem.exe
C:\0.Monitor_test\1000点\OSNSystem\OSNSystem\bin\Debug\OSNSystem.pdb
C:\0.Monitor_test\1000点\OSNSystem\OSNSystem\bin\Debug\mysql.data.dll
C:\0.Monitor_test\1000点\OSNSystem\OSNSystem\bin\Debug\TeeChart.dll
C:\0.Monitor_test\1000点\OSNSystem\OSNSystem\bin\Debug\TeeChart.xml
C:\0.Monitor_test\1000点\OSNSystem\OSNSystem\obj\x86\Debug\OSNSystem.csprojResolveAssemblyReference.cache
C:\0.Monitor_test\1000点\OSNSystem\OSNSystem\obj\x86\Debug\OSNSystem.cmdSet.resources
C:\0.Monitor_test\1000点\OSNSystem\OSNSystem\obj\x86\Debug\OSNSystem.commandAdd.resources
C:\0.Monitor_test\1000点\OSNSystem\OSNSystem\obj\x86\Debug\OSNSystem.Main.resources
C:\0.Monitor_test\1000点\OSNSystem\OSNSystem\obj\x86\Debug\OSNSystem.Properties.Resources.resources
C:\0.Monitor_test\1000点\OSNSystem\OSNSystem\obj\x86\Debug\OSNSystem.SetDO.resources
C:\0.Monitor_test\1000点\OSNSystem\OSNSystem\obj\x86\Debug\OSNSystem.csproj.GenerateResource.Cache
D:\安装源程序\4.源程序\2.Monitor\3.完成2\1000点\OSNSystem\OSNSystem\bin\Debug\OSNSystem.exe.config
D:\安装源程序\4.源程序\2.Monitor\3.完成2\1000点\OSNSystem\OSNSystem\obj\x86\Debug\OSNSystem.exe
D:\安装源程序\4.源程序\2.Monitor\3.完成2\1000点\OSNSystem\OSNSystem\obj\x86\Debug\OSNSystem.pdb
D:\安装源程序\4.源程序\2.Monitor\3.完成2\1000点\OSNSystem\OSNSystem\bin\Debug\OSNSystem.exe
D:\安装源程序\4.源程序\2.Monitor\3.完成2\1000点\OSNSystem\OSNSystem\bin\Debug\OSNSystem.pdb
D:\安装源程序\4.源程序\2.Monitor\3.完成2\1000点\OSNSystem\OSNSystem\bin\Debug\mysql.data.dll
D:\安装源程序\4.源程序\2.Monitor\3.完成2\1000点\OSNSystem\OSNSystem\bin\Debug\TeeChart.dll
D:\安装源程序\4.源程序\2.Monitor\3.完成2\1000点\OSNSystem\OSNSystem\bin\Debug\TeeChart.xml
D:\安装源程序\4.源程序\2.Monitor\3.完成2\1000点\OSNSystem\OSNSystem\obj\x86\Debug\ResolveAssemblyReference.cache
D:\安装源程序\4.源程序\2.Monitor\3.完成2\1000点\OSNSystem\OSNSystem\obj\x86\Debug\OSNSystem.cmdSet.resources
D:\安装源程序\4.源程序\2.Monitor\3.完成2\1000点\OSNSystem\OSNSystem\obj\x86\Debug\OSNSystem.commandAdd.resources
D:\安装源程序\4.源程序\2.Monitor\3.完成2\1000点\OSNSystem\OSNSystem\obj\x86\Debug\OSNSystem.Main.resources
D:\安装源程序\4.源程序\2.Monitor\3.完成2\1000点\OSNSystem\OSNSystem\obj\x86\Debug\OSNSystem.Properties.Resources.resources
D:\安装源程序\4.源程序\2.Monitor\3.完成2\1000点\OSNSystem\OSNSystem\obj\x86\Debug\OSNSystem.SetDO.resources
D:\安装源程序\4.源程序\2.Monitor\3.完成2\1000点\OSNSystem\OSNSystem\obj\x86\Debug\GenerateResource.read.1.tlog
D:\安装源程序\4.源程序\2.Monitor\3.完成2\1000点\OSNSystem\OSNSystem\obj\x86\Debug\GenerateResource.write.1.tlog
G:\1.xiangmu\1.863海底观测网\1.源代码\10.Final\2.Monitor\4.完成3\OSNSystem\OSNSystem\bin\Debug\OSNSystem.exe.config
G:\1.xiangmu\1.863海底观测网\1.源代码\10.Final\2.Monitor\4.完成3\OSNSystem\OSNSystem\obj\x86\Debug\OSNSystem.exe
G:\1.xiangmu\1.863海底观测网\1.源代码\10.Final\2.Monitor\4.完成3\OSNSystem\OSNSystem\obj\x86\Debug\OSNSystem.pdb
G:\1.xiangmu\1.863海底观测网\1.源代码\10.Final\2.Monitor\4.完成3\OSNSystem\OSNSystem\bin\Debug\OSNSystem.exe
G:\1.xiangmu\1.863海底观测网\1.源代码\10.Final\2.Monitor\4.完成3\OSNSystem\OSNSystem\bin\Debug\OSNSystem.pdb
G:\1.xiangmu\1.863海底观测网\1.源代码\10.Final\2.Monitor\4.完成3\OSNSystem\OSNSystem\bin\Debug\mysql.data.dll
G:\1.xiangmu\1.863海底观测网\1.源代码\10.Final\2.Monitor\4.完成3\OSNSystem\OSNSystem\bin\Debug\TeeChart.dll
G:\1.xiangmu\1.863海底观测网\1.源代码\10.Final\2.Monitor\4.完成3\OSNSystem\OSNSystem\bin\Debug\TeeChart.xml
G:\1.xiangmu\1.863海底观测网\1.源代码\10.Final\2.Monitor\4.完成3\OSNSystem\OSNSystem\obj\x86\Debug\ResolveAssemblyReference.cache
G:\1.xiangmu\1.863海底观测网\1.源代码\10.Final\2.Monitor\4.完成3\OSNSystem\OSNSystem\obj\x86\Debug\OSNSystem.cmdSet.resources
G:\1.xiangmu\1.863海底观测网\1.源代码\10.Final\2.Monitor\4.完成3\OSNSystem\OSNSystem\obj\x86\Debug\OSNSystem.commandAdd.resources
G:\1.xiangmu\1.863海底观测网\1.源代码\10.Final\2.Monitor\4.完成3\OSNSystem\OSNSystem\obj\x86\Debug\OSNSystem.Main.resources
G:\1.xiangmu\1.863海底观测网\1.源代码\10.Final\2.Monitor\4.完成3\OSNSystem\OSNSystem\obj\x86\Debug\OSNSystem.Properties.Resources.resources
G:\1.xiangmu\1.863海底观测网\1.源代码\10.Final\2.Monitor\4.完成3\OSNSystem\OSNSystem\obj\x86\Debug\OSNSystem.SetDO.resources
G:\1.xiangmu\1.863海底观测网\1.源代码\10.Final\2.Monitor\4.完成3\OSNSystem\OSNSystem\obj\x86\Debug\GenerateResource.read.1.tlog
G:\1.xiangmu\1.863海底观测网\1.源代码\10.Final\2.Monitor\4.完成3\OSNSystem\OSNSystem\obj\x86\Debug\GenerateResource.write.1.tlog
G:\1.xiangmu\1.863海底观测网\1.源代码\3.Final\2.可用\Ver1.2\OSNSystem\OSNSystem\bin\Debug\OSNSystem.exe.config
G:\1.xiangmu\1.863海底观测网\1.源代码\3.Final\2.可用\Ver1.2\OSNSystem\OSNSystem\obj\x86\Debug\OSNSystem.exe
G:\1.xiangmu\1.863海底观测网\1.源代码\3.Final\2.可用\Ver1.2\OSNSystem\OSNSystem\obj\x86\Debug\OSNSystem.pdb
C:\Users\Administrator\Desktop\Ver1.2\OSNSystem\OSNSystem\bin\Debug\OSNSystem.exe.config
C:\Users\Administrator\Desktop\Ver1.2\OSNSystem\OSNSystem\obj\x86\Debug\OSNSystem.exe
C:\Users\Administrator\Desktop\Ver1.2\OSNSystem\OSNSystem\obj\x86\Debug\OSNSystem.pdb
C:\Users\Administrator\Desktop\Ver1.2\OSNSystem\OSNSystem\bin\Debug\OSNSystem.exe
C:\Users\Administrator\Desktop\Ver1.2\OSNSystem\OSNSystem\bin\Debug\OSNSystem.pdb
C:\Users\Administrator\Desktop\Ver1.2\OSNSystem\OSNSystem\bin\Debug\mysql.data.dll
C:\Users\Administrator\Desktop\Ver1.2\OSNSystem\OSNSystem\bin\Debug\TeeChart.dll
C:\Users\Administrator\Desktop\Ver1.2\OSNSystem\OSNSystem\bin\Debug\TeeChart.xml
C:\Users\Administrator\Desktop\Ver1.2\OSNSystem\OSNSystem\obj\x86\Debug\ResolveAssemblyReference.cache
C:\Users\Administrator\Desktop\Ver1.2\OSNSystem\OSNSystem\obj\x86\Debug\OSNSystem.cmdSet.resources
C:\Users\Administrator\Desktop\Ver1.2\OSNSystem\OSNSystem\obj\x86\Debug\OSNSystem.commandAdd.resources
C:\Users\Administrator\Desktop\Ver1.2\OSNSystem\OSNSystem\obj\x86\Debug\OSNSystem.Main.resources
C:\Users\Administrator\Desktop\Ver1.2\OSNSystem\OSNSystem\obj\x86\Debug\OSNSystem.Properties.Resources.resources
C:\Users\Administrator\Desktop\Ver1.2\OSNSystem\OSNSystem\obj\x86\Debug\OSNSystem.SetDO.resources
C:\Users\Administrator\Desktop\Ver1.2\OSNSystem\OSNSystem\obj\x86\Debug\GenerateResource.read.1.tlog
C:\Users\Administrator\Desktop\Ver1.2\OSNSystem\OSNSystem\obj\x86\Debug\GenerateResource.write.1.tlog
C:\Users\admin\Desktop\Ver1.2\OSNSystem\OSNSystem\bin\Debug\OSNSystem.exe.config
C:\Users\admin\Desktop\Ver1.2\OSNSystem\OSNSystem\obj\x86\Debug\OSNSystem.exe
C:\Users\admin\Desktop\Ver1.2\OSNSystem\OSNSystem\obj\x86\Debug\OSNSystem.pdb
C:\Users\admin\Desktop\Ver1.2\OSNSystem\OSNSystem\bin\Debug\OSNSystem.exe
C:\Users\admin\Desktop\Ver1.2\OSNSystem\OSNSystem\bin\Debug\OSNSystem.pdb
C:\Users\admin\Desktop\Ver1.2\OSNSystem\OSNSystem\bin\Debug\mysql.data.dll
C:\Users\admin\Desktop\Ver1.2\OSNSystem\OSNSystem\bin\Debug\TeeChart.dll
C:\Users\admin\Desktop\Ver1.2\OSNSystem\OSNSystem\bin\Debug\TeeChart.xml
C:\Users\admin\Desktop\Ver1.2\OSNSystem\OSNSystem\obj\x86\Debug\ResolveAssemblyReference.cache
C:\Users\admin\Desktop\Ver1.2\OSNSystem\OSNSystem\obj\x86\Debug\OSNSystem.cmdSet.resources
C:\Users\admin\Desktop\Ver1.2\OSNSystem\OSNSystem\obj\x86\Debug\OSNSystem.commandAdd.resources
C:\Users\admin\Desktop\Ver1.2\OSNSystem\OSNSystem\obj\x86\Debug\OSNSystem.Main.resources
C:\Users\admin\Desktop\Ver1.2\OSNSystem\OSNSystem\obj\x86\Debug\OSNSystem.Properties.Resources.resources
C:\Users\admin\Desktop\Ver1.2\OSNSystem\OSNSystem\obj\x86\Debug\OSNSystem.SetDO.resources
C:\Users\admin\Desktop\Ver1.2\OSNSystem\OSNSystem\obj\x86\Debug\GenerateResource.read.1.tlog
C:\Users\admin\Desktop\Ver1.2\OSNSystem\OSNSystem\obj\x86\Debug\GenerateResource.write.1.tlog
C:\Users\Administrator\Desktop\final\Ver1.2\OSNSystem\OSNSystem\bin\Debug\OSNSystem.exe.config
C:\Users\Administrator\Desktop\final\Ver1.2\OSNSystem\OSNSystem\obj\x86\Debug\OSNSystem.exe
C:\Users\Administrator\Desktop\final\Ver1.2\OSNSystem\OSNSystem\obj\x86\Debug\OSNSystem.pdb
C:\Users\Administrator\Desktop\final\Ver1.2\OSNSystem\OSNSystem\bin\Debug\OSNSystem.exe
C:\Users\Administrator\Desktop\final\Ver1.2\OSNSystem\OSNSystem\bin\Debug\OSNSystem.pdb
C:\Users\Administrator\Desktop\final\Ver1.2\OSNSystem\OSNSystem\bin\Debug\mysql.data.dll
C:\Users\Administrator\Desktop\final\Ver1.2\OSNSystem\OSNSystem\bin\Debug\TeeChart.dll
C:\Users\Administrator\Desktop\final\Ver1.2\OSNSystem\OSNSystem\bin\Debug\TeeChart.xml
C:\Users\Administrator\Desktop\final\Ver1.2\OSNSystem\OSNSystem\obj\x86\Debug\ResolveAssemblyReference.cache
C:\Users\Administrator\Desktop\final\Ver1.2\OSNSystem\OSNSystem\obj\x86\Debug\OSNSystem.cmdSet.resources
C:\Users\Administrator\Desktop\final\Ver1.2\OSNSystem\OSNSystem\obj\x86\Debug\OSNSystem.commandAdd.resources
C:\Users\Administrator\Desktop\final\Ver1.2\OSNSystem\OSNSystem\obj\x86\Debug\OSNSystem.Main.resources
C:\Users\Administrator\Desktop\final\Ver1.2\OSNSystem\OSNSystem\obj\x86\Debug\OSNSystem.Properties.Resources.resources
C:\Users\Administrator\Desktop\final\Ver1.2\OSNSystem\OSNSystem\obj\x86\Debug\OSNSystem.SetDO.resources
C:\Users\Administrator\Desktop\final\Ver1.2\OSNSystem\OSNSystem\obj\x86\Debug\GenerateResource.read.1.tlog
C:\Users\Administrator\Desktop\final\Ver1.2\OSNSystem\OSNSystem\obj\x86\Debug\GenerateResource.write.1.tlog
C:\Users\admin\Desktop\final\Ver1.2\OSNSystem\OSNSystem\bin\Debug\OSNSystem.exe.config
C:\Users\admin\Desktop\final\Ver1.2\OSNSystem\OSNSystem\obj\x86\Debug\OSNSystem.exe
C:\Users\admin\Desktop\final\Ver1.2\OSNSystem\OSNSystem\obj\x86\Debug\OSNSystem.pdb
C:\Users\admin\Desktop\final\Ver1.2\OSNSystem\OSNSystem\bin\Debug\OSNSystem.exe
C:\Users\admin\Desktop\final\Ver1.2\OSNSystem\OSNSystem\bin\Debug\OSNSystem.pdb
C:\Users\admin\Desktop\final\Ver1.2\OSNSystem\OSNSystem\bin\Debug\mysql.data.dll
C:\Users\admin\Desktop\final\Ver1.2\OSNSystem\OSNSystem\bin\Debug\TeeChart.dll
C:\Users\admin\Desktop\final\Ver1.2\OSNSystem\OSNSystem\bin\Debug\TeeChart.xml
C:\Users\admin\Desktop\final\Ver1.2\OSNSystem\OSNSystem\obj\x86\Debug\ResolveAssemblyReference.cache
C:\Users\admin\Desktop\final\Ver1.2\OSNSystem\OSNSystem\obj\x86\Debug\OSNSystem.cmdSet.resources
C:\Users\admin\Desktop\final\Ver1.2\OSNSystem\OSNSystem\obj\x86\Debug\OSNSystem.commandAdd.resources
C:\Users\admin\Desktop\final\Ver1.2\OSNSystem\OSNSystem\obj\x86\Debug\OSNSystem.Main.resources
C:\Users\admin\Desktop\final\Ver1.2\OSNSystem\OSNSystem\obj\x86\Debug\OSNSystem.Properties.Resources.resources
C:\Users\admin\Desktop\final\Ver1.2\OSNSystem\OSNSystem\obj\x86\Debug\OSNSystem.SetDO.resources
C:\Users\admin\Desktop\final\Ver1.2\OSNSystem\OSNSystem\obj\x86\Debug\GenerateResource.read.1.tlog
C:\Users\admin\Desktop\final\Ver1.2\OSNSystem\OSNSystem\obj\x86\Debug\GenerateResource.write.1.tlog
G:\1.xiangmu\1.863海底观测网\1.源代码\3.Final\2.可用\final\Ver1.2\OSNSystem\OSNSystem\bin\Debug\OSNSystem.exe.config
G:\1.xiangmu\1.863海底观测网\1.源代码\3.Final\2.可用\final\Ver1.2\OSNSystem\OSNSystem\obj\x86\Debug\OSNSystem.exe
G:\1.xiangmu\1.863海底观测网\1.源代码\3.Final\2.可用\final\Ver1.2\OSNSystem\OSNSystem\obj\x86\Debug\OSNSystem.pdb
G:\1.xiangmu\1.863海底观测网\1.源代码\3.Final\2.可用\final\Ver1.2\OSNSystem\OSNSystem\bin\Debug\OSNSystem.exe
G:\1.xiangmu\1.863海底观测网\1.源代码\3.Final\2.可用\final\Ver1.2\OSNSystem\OSNSystem\bin\Debug\OSNSystem.pdb
G:\1.xiangmu\1.863海底观测网\1.源代码\3.Final\2.可用\final\Ver1.2\OSNSystem\OSNSystem\bin\Debug\mysql.data.dll
G:\1.xiangmu\1.863海底观测网\1.源代码\3.Final\2.可用\final\Ver1.2\OSNSystem\OSNSystem\bin\Debug\TeeChart.dll
G:\1.xiangmu\1.863海底观测网\1.源代码\3.Final\2.可用\final\Ver1.2\OSNSystem\OSNSystem\bin\Debug\TeeChart.xml
G:\1.xiangmu\1.863海底观测网\1.源代码\3.Final\2.可用\final\Ver1.2\OSNSystem\OSNSystem\obj\x86\Debug\ResolveAssemblyReference.cache
G:\1.xiangmu\1.863海底观测网\1.源代码\3.Final\2.可用\final\Ver1.2\OSNSystem\OSNSystem\obj\x86\Debug\OSNSystem.cmdSet.resources
G:\1.xiangmu\1.863海底观测网\1.源代码\3.Final\2.可用\final\Ver1.2\OSNSystem\OSNSystem\obj\x86\Debug\OSNSystem.commandAdd.resources
G:\1.xiangmu\1.863海底观测网\1.源代码\3.Final\2.可用\final\Ver1.2\OSNSystem\OSNSystem\obj\x86\Debug\OSNSystem.Main.resources
G:\1.xiangmu\1.863海底观测网\1.源代码\3.Final\2.可用\final\Ver1.2\OSNSystem\OSNSystem\obj\x86\Debug\OSNSystem.Properties.Resources.resources
G:\1.xiangmu\1.863海底观测网\1.源代码\3.Final\2.可用\final\Ver1.2\OSNSystem\OSNSystem\obj\x86\Debug\OSNSystem.SetDO.resources
G:\1.xiangmu\1.863海底观测网\1.源代码\3.Final\2.可用\final\Ver1.2\OSNSystem\OSNSystem\obj\x86\Debug\GenerateResource.read.1.tlog
G:\1.xiangmu\1.863海底观测网\1.源代码\3.Final\2.可用\final\Ver1.2\OSNSystem\OSNSystem\obj\x86\Debug\GenerateResource.write.1.tlog
C:\Users\Administrator\Desktop\程序优化-2017-04-24\final\Ver1.2\OSNSystem\OSNSystem\bin\Debug\OSNSystem.exe.config
C:\Users\Administrator\Desktop\程序优化-2017-04-24\final\Ver1.2\OSNSystem\OSNSystem\obj\x86\Debug\OSNSystem.exe
C:\Users\Administrator\Desktop\程序优化-2017-04-24\final\Ver1.2\OSNSystem\OSNSystem\obj\x86\Debug\OSNSystem.pdb
C:\Users\Administrator\Desktop\程序优化-2017-04-24\final\Ver1.2\OSNSystem\OSNSystem\bin\Debug\OSNSystem.exe
C:\Users\Administrator\Desktop\程序优化-2017-04-24\final\Ver1.2\OSNSystem\OSNSystem\bin\Debug\OSNSystem.pdb
C:\Users\Administrator\Desktop\程序优化-2017-04-24\final\Ver1.2\OSNSystem\OSNSystem\bin\Debug\mysql.data.dll
C:\Users\Administrator\Desktop\程序优化-2017-04-24\final\Ver1.2\OSNSystem\OSNSystem\bin\Debug\TeeChart.dll
C:\Users\Administrator\Desktop\程序优化-2017-04-24\final\Ver1.2\OSNSystem\OSNSystem\bin\Debug\TeeChart.xml
C:\Users\Administrator\Desktop\程序优化-2017-04-24\final\Ver1.2\OSNSystem\OSNSystem\obj\x86\Debug\ResolveAssemblyReference.cache
C:\Users\Administrator\Desktop\程序优化-2017-04-24\final\Ver1.2\OSNSystem\OSNSystem\obj\x86\Debug\OSNSystem.cmdSet.resources
C:\Users\Administrator\Desktop\程序优化-2017-04-24\final\Ver1.2\OSNSystem\OSNSystem\obj\x86\Debug\OSNSystem.commandAdd.resources
C:\Users\Administrator\Desktop\程序优化-2017-04-24\final\Ver1.2\OSNSystem\OSNSystem\obj\x86\Debug\OSNSystem.Main.resources
C:\Users\Administrator\Desktop\程序优化-2017-04-24\final\Ver1.2\OSNSystem\OSNSystem\obj\x86\Debug\OSNSystem.Properties.Resources.resources
C:\Users\Administrator\Desktop\程序优化-2017-04-24\final\Ver1.2\OSNSystem\OSNSystem\obj\x86\Debug\OSNSystem.SetDO.resources
C:\Users\Administrator\Desktop\程序优化-2017-04-24\final\Ver1.2\OSNSystem\OSNSystem\obj\x86\Debug\GenerateResource.read.1.tlog
C:\Users\Administrator\Desktop\程序优化-2017-04-24\final\Ver1.2\OSNSystem\OSNSystem\obj\x86\Debug\GenerateResource.write.1.tlog
C:\Users\Administrator\Desktop\程序大改\final\Ver1.2\OSNSystem\OSNSystem\bin\Debug\OSNSystem.exe.config
C:\Users\Administrator\Desktop\程序大改\final\Ver1.2\OSNSystem\OSNSystem\obj\x86\Debug\OSNSystem.exe
C:\Users\Administrator\Desktop\程序大改\final\Ver1.2\OSNSystem\OSNSystem\obj\x86\Debug\OSNSystem.pdb
C:\Users\Administrator\Desktop\程序大改\final\Ver1.2\OSNSystem\OSNSystem\obj\x86\Debug\OSNSystem.Main.resources
C:\Users\Administrator\Desktop\程序大改\final\Ver1.2\OSNSystem\OSNSystem\obj\x86\Debug\OSNSystem.Properties.Resources.resources
C:\Users\Administrator\Desktop\程序大改\final\Ver1.2\OSNSystem\OSNSystem\bin\Debug\OSNSystem.exe
C:\Users\Administrator\Desktop\程序大改\final\Ver1.2\OSNSystem\OSNSystem\bin\Debug\OSNSystem.pdb
C:\Users\Administrator\Desktop\程序大改\final\Ver1.2\OSNSystem\OSNSystem\bin\Debug\mysql.data.dll
C:\Users\Administrator\Desktop\程序大改\final\Ver1.2\OSNSystem\OSNSystem\bin\Debug\TeeChart.dll
C:\Users\Administrator\Desktop\程序大改\final\Ver1.2\OSNSystem\OSNSystem\bin\Debug\TeeChart.xml
C:\Users\Administrator\Desktop\程序大改\final\Ver1.2\OSNSystem\OSNSystem\obj\x86\Debug\OSNSystem.cmdSet.resources
C:\Users\Administrator\Desktop\程序大改\final\Ver1.2\OSNSystem\OSNSystem\obj\x86\Debug\OSNSystem.SetDO.resources
C:\Users\Administrator\Desktop\程序大改\final\Ver1.2\OSNSystem\OSNSystem\obj\x86\Debug\OSNSystem.csproj.GenerateResource.Cache
C:\Users\Administrator\Desktop\程序大改\final\Ver1.2\OSNSystem\OSNSystem\obj\x86\Debug\OSNSystem.csprojResolveAssemblyReference.cache
F:\1.xiangmu\4.接驳盒\2.源代码\3.上位机源代码\测试版\OSNSystem\OSNSystem\bin\Debug\OSNSystem.exe.config
F:\1.xiangmu\4.接驳盒\2.源代码\3.上位机源代码\测试版\OSNSystem\OSNSystem\obj\x86\Debug\OSNSystem.exe
F:\1.xiangmu\4.接驳盒\2.源代码\3.上位机源代码\测试版\OSNSystem\OSNSystem\obj\x86\Debug\OSNSystem.pdb
F:\1.xiangmu\4.接驳盒\2.源代码\3.上位机源代码\测试版\OSNSystem\OSNSystem\bin\Debug\OSNSystem.exe
F:\1.xiangmu\4.接驳盒\2.源代码\3.上位机源代码\测试版\OSNSystem\OSNSystem\bin\Debug\OSNSystem.pdb
F:\1.xiangmu\4.接驳盒\2.源代码\3.上位机源代码\测试版\OSNSystem\OSNSystem\bin\Debug\mysql.data.dll
F:\1.xiangmu\4.接驳盒\2.源代码\3.上位机源代码\测试版\OSNSystem\OSNSystem\bin\Debug\TeeChart.dll
F:\1.xiangmu\4.接驳盒\2.源代码\3.上位机源代码\测试版\OSNSystem\OSNSystem\bin\Debug\TeeChart.xml
F:\1.xiangmu\4.接驳盒\2.源代码\3.上位机源代码\测试版\OSNSystem\OSNSystem\obj\x86\Debug\OSNSystem.csprojResolveAssemblyReference.cache
F:\1.xiangmu\4.接驳盒\2.源代码\3.上位机源代码\测试版\OSNSystem\OSNSystem\obj\x86\Debug\OSNSystem.cmdSet.resources
F:\1.xiangmu\4.接驳盒\2.源代码\3.上位机源代码\测试版\OSNSystem\OSNSystem\obj\x86\Debug\OSNSystem.Main.resources
F:\1.xiangmu\4.接驳盒\2.源代码\3.上位机源代码\测试版\OSNSystem\OSNSystem\obj\x86\Debug\OSNSystem.Properties.Resources.resources
F:\1.xiangmu\4.接驳盒\2.源代码\3.上位机源代码\测试版\OSNSystem\OSNSystem\obj\x86\Debug\OSNSystem.SetDO.resources
F:\1.xiangmu\4.接驳盒\2.源代码\3.上位机源代码\测试版\OSNSystem\OSNSystem\obj\x86\Debug\OSNSystem.csproj.GenerateResource.Cache
C:\Users\Administrator\Desktop\上位机测试版\OSNSystem\OSNSystem\bin\Debug\OSNSystem.exe.config
C:\Users\Administrator\Desktop\上位机测试版\OSNSystem\OSNSystem\obj\x86\Debug\OSNSystem.exe
C:\Users\Administrator\Desktop\上位机测试版\OSNSystem\OSNSystem\obj\x86\Debug\OSNSystem.pdb
C:\Users\Administrator\Desktop\上位机测试版\OSNSystem\OSNSystem\bin\Debug\OSNSystem.exe
C:\Users\Administrator\Desktop\上位机测试版\OSNSystem\OSNSystem\bin\Debug\OSNSystem.pdb
C:\Users\Administrator\Desktop\上位机测试版\OSNSystem\OSNSystem\bin\Debug\mysql.data.dll
C:\Users\Administrator\Desktop\上位机测试版\OSNSystem\OSNSystem\bin\Debug\TeeChart.dll
C:\Users\Administrator\Desktop\上位机测试版\OSNSystem\OSNSystem\bin\Debug\TeeChart.xml
C:\Users\Administrator\Desktop\上位机测试版\OSNSystem\OSNSystem\obj\x86\Debug\OSNSystem.csprojResolveAssemblyReference.cache
C:\Users\Administrator\Desktop\上位机测试版\OSNSystem\OSNSystem\obj\x86\Debug\OSNSystem.cmdSet.resources
C:\Users\Administrator\Desktop\上位机测试版\OSNSystem\OSNSystem\obj\x86\Debug\OSNSystem.Main.resources
C:\Users\Administrator\Desktop\上位机测试版\OSNSystem\OSNSystem\obj\x86\Debug\OSNSystem.Properties.Resources.resources
C:\Users\Administrator\Desktop\上位机测试版\OSNSystem\OSNSystem\obj\x86\Debug\OSNSystem.csproj.GenerateResource.Cache
F:\1.xiangmu\4.接驳盒\2.源代码\2017-10-27上位机及下位机程序\上位机测试版\OSNSystem\OSNSystem\bin\Debug\OSNSystem.exe.config
F:\1.xiangmu\4.接驳盒\2.源代码\2017-10-27上位机及下位机程序\上位机测试版\OSNSystem\OSNSystem\obj\x86\Debug\OSNSystem.exe
F:\1.xiangmu\4.接驳盒\2.源代码\2017-10-27上位机及下位机程序\上位机测试版\OSNSystem\OSNSystem\obj\x86\Debug\OSNSystem.pdb
F:\1.xiangmu\4.接驳盒\2.源代码\2017-10-27上位机及下位机程序\上位机测试版\OSNSystem\OSNSystem\bin\Debug\OSNSystem.exe
F:\1.xiangmu\4.接驳盒\2.源代码\2017-10-27上位机及下位机程序\上位机测试版\OSNSystem\OSNSystem\bin\Debug\OSNSystem.pdb
F:\1.xiangmu\4.接驳盒\2.源代码\2017-10-27上位机及下位机程序\上位机测试版\OSNSystem\OSNSystem\bin\Debug\mysql.data.dll
F:\1.xiangmu\4.接驳盒\2.源代码\2017-10-27上位机及下位机程序\上位机测试版\OSNSystem\OSNSystem\bin\Debug\TeeChart.dll
F:\1.xiangmu\4.接驳盒\2.源代码\2017-10-27上位机及下位机程序\上位机测试版\OSNSystem\OSNSystem\bin\Debug\TeeChart.xml
F:\1.xiangmu\4.接驳盒\2.源代码\2017-10-27上位机及下位机程序\上位机测试版\OSNSystem\OSNSystem\obj\x86\Debug\OSNSystem.csprojResolveAssemblyReference.cache
F:\1.xiangmu\4.接驳盒\2.源代码\2017-10-27上位机及下位机程序\上位机测试版\OSNSystem\OSNSystem\obj\x86\Debug\OSNSystem.cmdSet.resources
F:\1.xiangmu\4.接驳盒\2.源代码\2017-10-27上位机及下位机程序\上位机测试版\OSNSystem\OSNSystem\obj\x86\Debug\OSNSystem.Main.resources
F:\1.xiangmu\4.接驳盒\2.源代码\2017-10-27上位机及下位机程序\上位机测试版\OSNSystem\OSNSystem\obj\x86\Debug\OSNSystem.Properties.Resources.resources
F:\1.xiangmu\4.接驳盒\2.源代码\2017-10-27上位机及下位机程序\上位机测试版\OSNSystem\OSNSystem\obj\x86\Debug\OSNSystem.csproj.GenerateResource.Cache
C:\Users\Administrator\Desktop\上位机测试\OSNSystem\OSNSystem\bin\Debug\OSNSystem.exe.config
C:\Users\Administrator\Desktop\上位机测试\OSNSystem\OSNSystem\obj\x86\Debug\OSNSystem.exe
C:\Users\Administrator\Desktop\上位机测试\OSNSystem\OSNSystem\obj\x86\Debug\OSNSystem.pdb
C:\Users\Administrator\Desktop\上位机测试\OSNSystem\OSNSystem\bin\Debug\OSNSystem.exe
C:\Users\Administrator\Desktop\上位机测试\OSNSystem\OSNSystem\bin\Debug\OSNSystem.pdb
C:\Users\Administrator\Desktop\上位机测试\OSNSystem\OSNSystem\bin\Debug\mysql.data.dll
C:\Users\Administrator\Desktop\上位机测试\OSNSystem\OSNSystem\bin\Debug\TeeChart.dll
C:\Users\Administrator\Desktop\上位机测试\OSNSystem\OSNSystem\bin\Debug\TeeChart.xml
C:\Users\Administrator\Desktop\上位机测试\OSNSystem\OSNSystem\obj\x86\Debug\OSNSystem.csprojResolveAssemblyReference.cache
C:\Users\Administrator\Desktop\上位机测试\OSNSystem\OSNSystem\obj\x86\Debug\OSNSystem.cmdSet.resources
C:\Users\Administrator\Desktop\上位机测试\OSNSystem\OSNSystem\obj\x86\Debug\OSNSystem.Main.resources
C:\Users\Administrator\Desktop\上位机测试\OSNSystem\OSNSystem\obj\x86\Debug\OSNSystem.Properties.Resources.resources
C:\Users\Administrator\Desktop\上位机测试\OSNSystem\OSNSystem\obj\x86\Debug\OSNSystem.csproj.GenerateResource.Cache
C:\Users\Administrator\Desktop\接驳盒上位机\OSNSystem\OSNSystem\bin\Debug\OSNSystem.exe.config
C:\Users\Administrator\Desktop\接驳盒上位机\OSNSystem\OSNSystem\obj\x86\Debug\OSNSystem.exe
C:\Users\Administrator\Desktop\接驳盒上位机\OSNSystem\OSNSystem\obj\x86\Debug\OSNSystem.pdb
C:\Users\Administrator\Desktop\接驳盒上位机\OSNSystem\OSNSystem\bin\Debug\OSNSystem.exe
C:\Users\Administrator\Desktop\接驳盒上位机\OSNSystem\OSNSystem\bin\Debug\OSNSystem.pdb
C:\Users\Administrator\Desktop\接驳盒上位机\OSNSystem\OSNSystem\bin\Debug\mysql.data.dll
C:\Users\Administrator\Desktop\接驳盒上位机\OSNSystem\OSNSystem\bin\Debug\TeeChart.dll
C:\Users\Administrator\Desktop\接驳盒上位机\OSNSystem\OSNSystem\bin\Debug\TeeChart.xml
C:\Users\Administrator\Desktop\接驳盒上位机\OSNSystem\OSNSystem\obj\x86\Debug\OSNSystem.csprojResolveAssemblyReference.cache
C:\Users\Administrator\Desktop\接驳盒上位机\OSNSystem\OSNSystem\obj\x86\Debug\OSNSystem.cmdSet.resources
C:\Users\Administrator\Desktop\接驳盒上位机\OSNSystem\OSNSystem\obj\x86\Debug\OSNSystem.Main.resources
C:\Users\Administrator\Desktop\接驳盒上位机\OSNSystem\OSNSystem\obj\x86\Debug\OSNSystem.Properties.Resources.resources
C:\Users\Administrator\Desktop\接驳盒上位机\OSNSystem\OSNSystem\obj\x86\Debug\OSNSystem.csproj.GenerateResource.Cache
C:\Users\Administrator\Desktop\接驳盒上位机\OSNSystem\OSNSystem\obj\x86\Debug\OSNSystem.SetCamera.resources
C:\Users\Administrator\Desktop\接驳盒上位机\OSNSystem\OSNSystem\obj\x86\Debug\OSNSystem.SetDO.resources
C:\Users\Administrator\Desktop\接驳盒上位机\OSNSystem\OSNSystem\obj\x86\Debug\OSNSystem.cmdCollectSet.resources
C:\Users\Administrator\Desktop\接驳盒上位机\OSNSystem\OSNSystem\obj\x86\Debug\OSNSystem.SetPicScope.resources
F:\0.chenjie\3.接驳盒上位机\接驳盒上位机\OSNSystem\OSNSystem\bin\Debug\OSNSystem.exe.config
F:\0.chenjie\3.接驳盒上位机\接驳盒上位机\OSNSystem\OSNSystem\obj\x86\Debug\OSNSystem.exe
F:\0.chenjie\3.接驳盒上位机\接驳盒上位机\OSNSystem\OSNSystem\obj\x86\Debug\OSNSystem.pdb
F:\0.chenjie\3.接驳盒上位机\接驳盒上位机\OSNSystem\OSNSystem\bin\Debug\OSNSystem.exe
F:\0.chenjie\3.接驳盒上位机\接驳盒上位机\OSNSystem\OSNSystem\bin\Debug\OSNSystem.pdb
F:\0.chenjie\3.接驳盒上位机\接驳盒上位机\OSNSystem\OSNSystem\bin\Debug\mysql.data.dll
F:\0.chenjie\3.接驳盒上位机\接驳盒上位机\OSNSystem\OSNSystem\bin\Debug\TeeChart.dll
F:\0.chenjie\3.接驳盒上位机\接驳盒上位机\OSNSystem\OSNSystem\bin\Debug\TeeChart.xml
F:\0.chenjie\3.接驳盒上位机\接驳盒上位机\OSNSystem\OSNSystem\obj\x86\Debug\OSNSystem.csprojResolveAssemblyReference.cache
F:\0.chenjie\3.接驳盒上位机\接驳盒上位机\OSNSystem\OSNSystem\obj\x86\Debug\OSNSystem.cmdCollectSet.resources
F:\0.chenjie\3.接驳盒上位机\接驳盒上位机\OSNSystem\OSNSystem\obj\x86\Debug\OSNSystem.cmdSet.resources
F:\0.chenjie\3.接驳盒上位机\接驳盒上位机\OSNSystem\OSNSystem\obj\x86\Debug\OSNSystem.Main.resources
F:\0.chenjie\3.接驳盒上位机\接驳盒上位机\OSNSystem\OSNSystem\obj\x86\Debug\OSNSystem.Properties.Resources.resources
F:\0.chenjie\3.接驳盒上位机\接驳盒上位机\OSNSystem\OSNSystem\obj\x86\Debug\OSNSystem.SetCamera.resources
F:\0.chenjie\3.接驳盒上位机\接驳盒上位机\OSNSystem\OSNSystem\obj\x86\Debug\OSNSystem.SetDO.resources
F:\0.chenjie\3.接驳盒上位机\接驳盒上位机\OSNSystem\OSNSystem\obj\x86\Debug\OSNSystem.SetPicScope.resources
F:\0.chenjie\3.接驳盒上位机\接驳盒上位机\OSNSystem\OSNSystem\obj\x86\Debug\OSNSystem.csproj.GenerateResource.Cache
C:\Users\Administrator\Desktop\接驳盒上位机\2018-03-06\接驳盒上位机\OSNSystem\OSNSystem\bin\Debug\OSNSystem.exe.config
C:\Users\Administrator\Desktop\接驳盒上位机\2018-03-06\接驳盒上位机\OSNSystem\OSNSystem\obj\x86\Debug\OSNSystem.exe
C:\Users\Administrator\Desktop\接驳盒上位机\2018-03-06\接驳盒上位机\OSNSystem\OSNSystem\obj\x86\Debug\OSNSystem.pdb
C:\Users\Administrator\Desktop\接驳盒上位机\2018-03-06\接驳盒上位机\OSNSystem\OSNSystem\bin\Debug\OSNSystem.exe
C:\Users\Administrator\Desktop\接驳盒上位机\2018-03-06\接驳盒上位机\OSNSystem\OSNSystem\bin\Debug\OSNSystem.pdb
C:\Users\Administrator\Desktop\接驳盒上位机\2018-03-06\接驳盒上位机\OSNSystem\OSNSystem\bin\Debug\mysql.data.dll
C:\Users\Administrator\Desktop\接驳盒上位机\2018-03-06\接驳盒上位机\OSNSystem\OSNSystem\bin\Debug\TeeChart.dll
C:\Users\Administrator\Desktop\接驳盒上位机\2018-03-06\接驳盒上位机\OSNSystem\OSNSystem\bin\Debug\TeeChart.xml
C:\Users\Administrator\Desktop\接驳盒上位机\2018-03-06\接驳盒上位机\OSNSystem\OSNSystem\obj\x86\Debug\OSNSystem.csprojResolveAssemblyReference.cache
C:\Users\Administrator\Desktop\接驳盒上位机\2018-03-06\接驳盒上位机\OSNSystem\OSNSystem\obj\x86\Debug\OSNSystem.cmdCollectSet.resources
C:\Users\Administrator\Desktop\接驳盒上位机\2018-03-06\接驳盒上位机\OSNSystem\OSNSystem\obj\x86\Debug\OSNSystem.cmdSet.resources
C:\Users\Administrator\Desktop\接驳盒上位机\2018-03-06\接驳盒上位机\OSNSystem\OSNSystem\obj\x86\Debug\OSNSystem.Main.resources
C:\Users\Administrator\Desktop\接驳盒上位机\2018-03-06\接驳盒上位机\OSNSystem\OSNSystem\obj\x86\Debug\OSNSystem.Properties.Resources.resources
C:\Users\Administrator\Desktop\接驳盒上位机\2018-03-06\接驳盒上位机\OSNSystem\OSNSystem\obj\x86\Debug\OSNSystem.SetCamera.resources
C:\Users\Administrator\Desktop\接驳盒上位机\2018-03-06\接驳盒上位机\OSNSystem\OSNSystem\obj\x86\Debug\OSNSystem.SetDO.resources
C:\Users\Administrator\Desktop\接驳盒上位机\2018-03-06\接驳盒上位机\OSNSystem\OSNSystem\obj\x86\Debug\OSNSystem.SetPicScope.resources
C:\Users\Administrator\Desktop\接驳盒上位机\2018-03-06\接驳盒上位机\OSNSystem\OSNSystem\obj\x86\Debug\OSNSystem.csproj.GenerateResource.Cache
C:\Users\Administrator\Desktop\接驳盒上位机 - 副本\2018-03-06\接驳盒上位机\OSNSystem\OSNSystem\bin\Debug\OSNSystem.exe.config
C:\Users\Administrator\Desktop\接驳盒上位机 - 副本\2018-03-06\接驳盒上位机\OSNSystem\OSNSystem\obj\x86\Debug\OSNSystem.exe
C:\Users\Administrator\Desktop\接驳盒上位机 - 副本\2018-03-06\接驳盒上位机\OSNSystem\OSNSystem\obj\x86\Debug\OSNSystem.pdb
C:\Users\Administrator\Desktop\接驳盒上位机 - 副本\2018-03-06\接驳盒上位机\OSNSystem\OSNSystem\bin\Debug\OSNSystem.exe
C:\Users\Administrator\Desktop\接驳盒上位机 - 副本\2018-03-06\接驳盒上位机\OSNSystem\OSNSystem\bin\Debug\OSNSystem.pdb
C:\Users\Administrator\Desktop\接驳盒上位机 - 副本\2018-03-06\接驳盒上位机\OSNSystem\OSNSystem\bin\Debug\mysql.data.dll
C:\Users\Administrator\Desktop\接驳盒上位机 - 副本\2018-03-06\接驳盒上位机\OSNSystem\OSNSystem\bin\Debug\TeeChart.dll
C:\Users\Administrator\Desktop\接驳盒上位机 - 副本\2018-03-06\接驳盒上位机\OSNSystem\OSNSystem\bin\Debug\TeeChart.xml
C:\Users\Administrator\Desktop\接驳盒上位机 - 副本\2018-03-06\接驳盒上位机\OSNSystem\OSNSystem\obj\x86\Debug\OSNSystem.csprojResolveAssemblyReference.cache
C:\Users\Administrator\Desktop\接驳盒上位机 - 副本\2018-03-06\接驳盒上位机\OSNSystem\OSNSystem\obj\x86\Debug\OSNSystem.cmdCollectSet.resources
C:\Users\Administrator\Desktop\接驳盒上位机 - 副本\2018-03-06\接驳盒上位机\OSNSystem\OSNSystem\obj\x86\Debug\OSNSystem.cmdSet.resources
C:\Users\Administrator\Desktop\接驳盒上位机 - 副本\2018-03-06\接驳盒上位机\OSNSystem\OSNSystem\obj\x86\Debug\OSNSystem.Main.resources
C:\Users\Administrator\Desktop\接驳盒上位机 - 副本\2018-03-06\接驳盒上位机\OSNSystem\OSNSystem\obj\x86\Debug\OSNSystem.Properties.Resources.resources
C:\Users\Administrator\Desktop\接驳盒上位机 - 副本\2018-03-06\接驳盒上位机\OSNSystem\OSNSystem\obj\x86\Debug\OSNSystem.SetCamera.resources
C:\Users\Administrator\Desktop\接驳盒上位机 - 副本\2018-03-06\接驳盒上位机\OSNSystem\OSNSystem\obj\x86\Debug\OSNSystem.SetDO.resources
C:\Users\Administrator\Desktop\接驳盒上位机 - 副本\2018-03-06\接驳盒上位机\OSNSystem\OSNSystem\obj\x86\Debug\OSNSystem.SetPicScope.resources
C:\Users\Administrator\Desktop\接驳盒上位机 - 副本\2018-03-06\接驳盒上位机\OSNSystem\OSNSystem\obj\x86\Debug\OSNSystem.csproj.GenerateResource.Cache
C:\Users\Administrator\Desktop\接驳盒上位机 - 副本\2018-03-06\接驳盒上位机\OSNSystem\OSNSystem\obj\x86\Debug\OSNSystem.Form1.resources
C:\Users\Administrator\Desktop\接驳盒上位机 - 副本\2018-03-06\接驳盒上位机\OSNSystem\OSNSystem\obj\x86\Debug\OSNSystem.SensorConfig.resources
C:\Users\Administrator\Desktop\接驳盒上位机 - 副本\2018-03-06\接驳盒上位机\OSNSystem\OSNSystem\obj\x86\Debug\OSNSystem.SetCTD.resources
C:\Users\Administrator\Desktop\接驳盒上位机 - 副本\2018-04-18保留一个数据采集器\OSNSystem\OSNSystem\bin\Debug\OSNSystem.exe.config
C:\Users\Administrator\Desktop\接驳盒上位机 - 副本\2018-04-18保留一个数据采集器\OSNSystem\OSNSystem\obj\x86\Debug\OSNSystem.exe
C:\Users\Administrator\Desktop\接驳盒上位机 - 副本\2018-04-18保留一个数据采集器\OSNSystem\OSNSystem\obj\x86\Debug\OSNSystem.pdb
C:\Users\Administrator\Desktop\接驳盒上位机 - 副本\2018-04-18保留一个数据采集器\OSNSystem\OSNSystem\obj\x86\Debug\OSNSystem.csprojResolveAssemblyReference.cache
C:\Users\Administrator\Desktop\接驳盒上位机 - 副本\2018-04-18保留一个数据采集器\OSNSystem\OSNSystem\obj\x86\Debug\OSNSystem.cmdCollectSet.resources
C:\Users\Administrator\Desktop\接驳盒上位机 - 副本\2018-04-18保留一个数据采集器\OSNSystem\OSNSystem\obj\x86\Debug\OSNSystem.cmdSet.resources
C:\Users\Administrator\Desktop\接驳盒上位机 - 副本\2018-04-18保留一个数据采集器\OSNSystem\OSNSystem\obj\x86\Debug\OSNSystem.Form1.resources
C:\Users\Administrator\Desktop\接驳盒上位机 - 副本\2018-04-18保留一个数据采集器\OSNSystem\OSNSystem\obj\x86\Debug\OSNSystem.Main.resources
C:\Users\Administrator\Desktop\接驳盒上位机 - 副本\2018-04-18保留一个数据采集器\OSNSystem\OSNSystem\obj\x86\Debug\OSNSystem.Properties.Resources.resources
C:\Users\Administrator\Desktop\接驳盒上位机 - 副本\2018-04-18保留一个数据采集器\OSNSystem\OSNSystem\obj\x86\Debug\OSNSystem.SensorConfig.resources
C:\Users\Administrator\Desktop\接驳盒上位机 - 副本\2018-04-18保留一个数据采集器\OSNSystem\OSNSystem\obj\x86\Debug\OSNSystem.SetCamera.resources
C:\Users\Administrator\Desktop\接驳盒上位机 - 副本\2018-04-18保留一个数据采集器\OSNSystem\OSNSystem\obj\x86\Debug\OSNSystem.SetCTD.resources
C:\Users\Administrator\Desktop\接驳盒上位机 - 副本\2018-04-18保留一个数据采集器\OSNSystem\OSNSystem\obj\x86\Debug\OSNSystem.SetDO.resources
C:\Users\Administrator\Desktop\接驳盒上位机 - 副本\2018-04-18保留一个数据采集器\OSNSystem\OSNSystem\obj\x86\Debug\OSNSystem.SetPicScope.resources
C:\Users\Administrator\Desktop\接驳盒上位机 - 副本\2018-04-18保留一个数据采集器\OSNSystem\OSNSystem\obj\x86\Debug\OSNSystem.csproj.GenerateResource.Cache
C:\Users\Administrator\Desktop\接驳盒上位机 - 副本\2018-04-18保留一个数据采集器\OSNSystem\OSNSystem\bin\Debug\OSNSystem.exe
C:\Users\Administrator\Desktop\接驳盒上位机 - 副本\2018-04-18保留一个数据采集器\OSNSystem\OSNSystem\bin\Debug\OSNSystem.pdb
C:\Users\Administrator\Desktop\接驳盒上位机 - 副本\2018-04-18保留一个数据采集器\OSNSystem\OSNSystem\bin\Debug\mysql.data.dll
C:\Users\Administrator\Desktop\接驳盒上位机 - 副本\2018-04-18保留一个数据采集器\OSNSystem\OSNSystem\bin\Debug\TeeChart.dll
C:\Users\Administrator\Desktop\接驳盒上位机 - 副本\2018-04-18保留一个数据采集器\OSNSystem\OSNSystem\bin\Debug\TeeChart.xml
C:\Users\Administrator\Desktop\接驳盒上位机 - 副本\2018-04-18保留一个数据采集器\OSNSystem\OSNSystem\obj\x86\Debug\OSNSystem.ShowCTDFigure.resources
F:\0.chenjie\3.接驳盒上位机\2.接驳盒上位机\2018-04-26-2-CTD曲线图例更改\OSNSystem\OSNSystem\bin\Debug\OSNSystem.exe.config
F:\0.chenjie\3.接驳盒上位机\2.接驳盒上位机\2018-04-26-2-CTD曲线图例更改\OSNSystem\OSNSystem\obj\x86\Debug\OSNSystem.exe
F:\0.chenjie\3.接驳盒上位机\2.接驳盒上位机\2018-04-26-2-CTD曲线图例更改\OSNSystem\OSNSystem\obj\x86\Debug\OSNSystem.pdb
F:\0.chenjie\3.接驳盒上位机\2.接驳盒上位机\2018-04-26-2-CTD曲线图例更改\OSNSystem\OSNSystem\bin\Debug\OSNSystem.exe
F:\0.chenjie\3.接驳盒上位机\2.接驳盒上位机\2018-04-26-2-CTD曲线图例更改\OSNSystem\OSNSystem\bin\Debug\OSNSystem.pdb
F:\0.chenjie\3.接驳盒上位机\2.接驳盒上位机\2018-04-26-2-CTD曲线图例更改\OSNSystem\OSNSystem\bin\Debug\mysql.data.dll
F:\0.chenjie\3.接驳盒上位机\2.接驳盒上位机\2018-04-26-2-CTD曲线图例更改\OSNSystem\OSNSystem\bin\Debug\TeeChart.dll
F:\0.chenjie\3.接驳盒上位机\2.接驳盒上位机\2018-04-26-2-CTD曲线图例更改\OSNSystem\OSNSystem\bin\Debug\TeeChart.xml
F:\0.chenjie\3.接驳盒上位机\2.接驳盒上位机\2018-04-26-2-CTD曲线图例更改\OSNSystem\OSNSystem\obj\x86\Debug\OSNSystem.csprojResolveAssemblyReference.cache
F:\0.chenjie\3.接驳盒上位机\2.接驳盒上位机\2018-04-26-2-CTD曲线图例更改\OSNSystem\OSNSystem\obj\x86\Debug\OSNSystem.cmdCollectSet.resources
F:\0.chenjie\3.接驳盒上位机\2.接驳盒上位机\2018-04-26-2-CTD曲线图例更改\OSNSystem\OSNSystem\obj\x86\Debug\OSNSystem.cmdSet.resources
F:\0.chenjie\3.接驳盒上位机\2.接驳盒上位机\2018-04-26-2-CTD曲线图例更改\OSNSystem\OSNSystem\obj\x86\Debug\OSNSystem.Form1.resources
F:\0.chenjie\3.接驳盒上位机\2.接驳盒上位机\2018-04-26-2-CTD曲线图例更改\OSNSystem\OSNSystem\obj\x86\Debug\OSNSystem.Main.resources
F:\0.chenjie\3.接驳盒上位机\2.接驳盒上位机\2018-04-26-2-CTD曲线图例更改\OSNSystem\OSNSystem\obj\x86\Debug\OSNSystem.Properties.Resources.resources
F:\0.chenjie\3.接驳盒上位机\2.接驳盒上位机\2018-04-26-2-CTD曲线图例更改\OSNSystem\OSNSystem\obj\x86\Debug\OSNSystem.SensorConfig.resources
F:\0.chenjie\3.接驳盒上位机\2.接驳盒上位机\2018-04-26-2-CTD曲线图例更改\OSNSystem\OSNSystem\obj\x86\Debug\OSNSystem.SetCamera.resources
F:\0.chenjie\3.接驳盒上位机\2.接驳盒上位机\2018-04-26-2-CTD曲线图例更改\OSNSystem\OSNSystem\obj\x86\Debug\OSNSystem.SetCTD.resources
F:\0.chenjie\3.接驳盒上位机\2.接驳盒上位机\2018-04-26-2-CTD曲线图例更改\OSNSystem\OSNSystem\obj\x86\Debug\OSNSystem.SetDO.resources
F:\0.chenjie\3.接驳盒上位机\2.接驳盒上位机\2018-04-26-2-CTD曲线图例更改\OSNSystem\OSNSystem\obj\x86\Debug\OSNSystem.SetPicScope.resources
F:\0.chenjie\3.接驳盒上位机\2.接驳盒上位机\2018-04-26-2-CTD曲线图例更改\OSNSystem\OSNSystem\obj\x86\Debug\OSNSystem.ShowCTDFigure.resources
F:\0.chenjie\3.接驳盒上位机\2.接驳盒上位机\2018-04-26-2-CTD曲线图例更改\OSNSystem\OSNSystem\obj\x86\Debug\OSNSystem.csproj.GenerateResource.Cache
C:\Users\Administrator\Desktop\2018-05-15\OSNSystem\OSNSystem\bin\Debug\OSNSystem.exe.config
C:\Users\Administrator\Desktop\2018-05-15\OSNSystem\OSNSystem\obj\x86\Debug\OSNSystem.exe
C:\Users\Administrator\Desktop\2018-05-15\OSNSystem\OSNSystem\obj\x86\Debug\OSNSystem.pdb
C:\Users\Administrator\Desktop\2018-05-15\OSNSystem\OSNSystem\bin\Debug\OSNSystem.exe
C:\Users\Administrator\Desktop\2018-05-15\OSNSystem\OSNSystem\bin\Debug\OSNSystem.pdb
C:\Users\Administrator\Desktop\2018-05-15\OSNSystem\OSNSystem\bin\Debug\mysql.data.dll
C:\Users\Administrator\Desktop\2018-05-15\OSNSystem\OSNSystem\bin\Debug\TeeChart.dll
C:\Users\Administrator\Desktop\2018-05-15\OSNSystem\OSNSystem\bin\Debug\TeeChart.xml
C:\Users\Administrator\Desktop\2018-05-15\OSNSystem\OSNSystem\obj\x86\Debug\OSNSystem.csprojResolveAssemblyReference.cache
C:\Users\Administrator\Desktop\2018-05-15\OSNSystem\OSNSystem\obj\x86\Debug\OSNSystem.cmdCollectSet.resources
C:\Users\Administrator\Desktop\2018-05-15\OSNSystem\OSNSystem\obj\x86\Debug\OSNSystem.cmdSet.resources
C:\Users\Administrator\Desktop\2018-05-15\OSNSystem\OSNSystem\obj\x86\Debug\OSNSystem.Form1.resources
C:\Users\Administrator\Desktop\2018-05-15\OSNSystem\OSNSystem\obj\x86\Debug\OSNSystem.Main.resources
C:\Users\Administrator\Desktop\2018-05-15\OSNSystem\OSNSystem\obj\x86\Debug\OSNSystem.Properties.Resources.resources
C:\Users\Administrator\Desktop\2018-05-15\OSNSystem\OSNSystem\obj\x86\Debug\OSNSystem.SensorConfig.resources
C:\Users\Administrator\Desktop\2018-05-15\OSNSystem\OSNSystem\obj\x86\Debug\OSNSystem.SetCamera.resources
C:\Users\Administrator\Desktop\2018-05-15\OSNSystem\OSNSystem\obj\x86\Debug\OSNSystem.SetCTD.resources
C:\Users\Administrator\Desktop\2018-05-15\OSNSystem\OSNSystem\obj\x86\Debug\OSNSystem.SetDO.resources
C:\Users\Administrator\Desktop\2018-05-15\OSNSystem\OSNSystem\obj\x86\Debug\OSNSystem.SetPicScope.resources
C:\Users\Administrator\Desktop\2018-05-15\OSNSystem\OSNSystem\obj\x86\Debug\OSNSystem.ShowCTDFigure.resources
C:\Users\Administrator\Desktop\2018-05-15\OSNSystem\OSNSystem\obj\x86\Debug\OSNSystem.csproj.GenerateResource.Cache
C:\Users\Administrator\Desktop\接驳盒上位机 - 副本\工控机运行版本\OSNSystem\OSNSystem\bin\Debug\OSNSystem.exe.config
C:\Users\Administrator\Desktop\接驳盒上位机 - 副本\工控机运行版本\OSNSystem\OSNSystem\obj\x86\Debug\OSNSystem.exe
C:\Users\Administrator\Desktop\接驳盒上位机 - 副本\工控机运行版本\OSNSystem\OSNSystem\obj\x86\Debug\OSNSystem.pdb
C:\Users\Administrator\Desktop\接驳盒上位机 - 副本\工控机运行版本\OSNSystem\OSNSystem\bin\Debug\OSNSystem.exe
C:\Users\Administrator\Desktop\接驳盒上位机 - 副本\工控机运行版本\OSNSystem\OSNSystem\bin\Debug\OSNSystem.pdb
C:\Users\Administrator\Desktop\接驳盒上位机 - 副本\工控机运行版本\OSNSystem\OSNSystem\bin\Debug\mysql.data.dll
C:\Users\Administrator\Desktop\接驳盒上位机 - 副本\工控机运行版本\OSNSystem\OSNSystem\bin\Debug\TeeChart.dll
C:\Users\Administrator\Desktop\接驳盒上位机 - 副本\工控机运行版本\OSNSystem\OSNSystem\bin\Debug\TeeChart.xml
C:\Users\Administrator\Desktop\接驳盒上位机 - 副本\工控机运行版本\OSNSystem\OSNSystem\obj\x86\Debug\OSNSystem.csprojResolveAssemblyReference.cache
C:\Users\Administrator\Desktop\接驳盒上位机 - 副本\工控机运行版本\OSNSystem\OSNSystem\obj\x86\Debug\OSNSystem.cmdCollectSet.resources
C:\Users\Administrator\Desktop\接驳盒上位机 - 副本\工控机运行版本\OSNSystem\OSNSystem\obj\x86\Debug\OSNSystem.cmdSet.resources
C:\Users\Administrator\Desktop\接驳盒上位机 - 副本\工控机运行版本\OSNSystem\OSNSystem\obj\x86\Debug\OSNSystem.Form1.resources
C:\Users\Administrator\Desktop\接驳盒上位机 - 副本\工控机运行版本\OSNSystem\OSNSystem\obj\x86\Debug\OSNSystem.Main.resources
C:\Users\Administrator\Desktop\接驳盒上位机 - 副本\工控机运行版本\OSNSystem\OSNSystem\obj\x86\Debug\OSNSystem.Properties.Resources.resources
C:\Users\Administrator\Desktop\接驳盒上位机 - 副本\工控机运行版本\OSNSystem\OSNSystem\obj\x86\Debug\OSNSystem.SensorConfig.resources
C:\Users\Administrator\Desktop\接驳盒上位机 - 副本\工控机运行版本\OSNSystem\OSNSystem\obj\x86\Debug\OSNSystem.SetCamera.resources
C:\Users\Administrator\Desktop\接驳盒上位机 - 副本\工控机运行版本\OSNSystem\OSNSystem\obj\x86\Debug\OSNSystem.SetCTD.resources
C:\Users\Administrator\Desktop\接驳盒上位机 - 副本\工控机运行版本\OSNSystem\OSNSystem\obj\x86\Debug\OSNSystem.SetDO.resources
C:\Users\Administrator\Desktop\接驳盒上位机 - 副本\工控机运行版本\OSNSystem\OSNSystem\obj\x86\Debug\OSNSystem.SetPicScope.resources
C:\Users\Administrator\Desktop\接驳盒上位机 - 副本\工控机运行版本\OSNSystem\OSNSystem\obj\x86\Debug\OSNSystem.ShowCTDFigure.resources
C:\Users\Administrator\Desktop\接驳盒上位机 - 副本\工控机运行版本\OSNSystem\OSNSystem\obj\x86\Debug\OSNSystem.csproj.GenerateResource.Cache
C:\Users\Administrator\Desktop\接驳盒上位机 - 副本\工控机运行版本\OSNSystem\OSNSystem\obj\x86\Debug\OSNSystem.SetMulti.resources
D:\源程序_chenjie\3.上位机源程序\2.可用\优化版本\7.海洋牧场上位机_0518\OSNSystem\OSNSystem\bin\Debug\OSNSystem.exe.config
D:\源程序_chenjie\3.上位机源程序\2.可用\优化版本\7.海洋牧场上位机_0518\OSNSystem\OSNSystem\obj\x86\Debug\OSNSystem.exe
D:\源程序_chenjie\3.上位机源程序\2.可用\优化版本\7.海洋牧场上位机_0518\OSNSystem\OSNSystem\obj\x86\Debug\OSNSystem.pdb
D:\源程序_chenjie\3.上位机源程序\2.可用\优化版本\7.海洋牧场上位机_0518\OSNSystem\OSNSystem\bin\Debug\OSNSystem.exe
D:\源程序_chenjie\3.上位机源程序\2.可用\优化版本\7.海洋牧场上位机_0518\OSNSystem\OSNSystem\bin\Debug\OSNSystem.pdb
D:\源程序_chenjie\3.上位机源程序\2.可用\优化版本\7.海洋牧场上位机_0518\OSNSystem\OSNSystem\bin\Debug\mysql.data.dll
D:\源程序_chenjie\3.上位机源程序\2.可用\优化版本\7.海洋牧场上位机_0518\OSNSystem\OSNSystem\bin\Debug\TeeChart.dll
D:\源程序_chenjie\3.上位机源程序\2.可用\优化版本\7.海洋牧场上位机_0518\OSNSystem\OSNSystem\bin\Debug\TeeChart.xml
D:\源程序_chenjie\3.上位机源程序\2.可用\优化版本\7.海洋牧场上位机_0518\OSNSystem\OSNSystem\obj\x86\Debug\OSNSystem.csprojResolveAssemblyReference.cache
D:\源程序_chenjie\3.上位机源程序\2.可用\优化版本\7.海洋牧场上位机_0518\OSNSystem\OSNSystem\obj\x86\Debug\OSNSystem.cmdCollectSet.resources
D:\源程序_chenjie\3.上位机源程序\2.可用\优化版本\7.海洋牧场上位机_0518\OSNSystem\OSNSystem\obj\x86\Debug\OSNSystem.cmdSet.resources
D:\源程序_chenjie\3.上位机源程序\2.可用\优化版本\7.海洋牧场上位机_0518\OSNSystem\OSNSystem\obj\x86\Debug\OSNSystem.Form1.resources
D:\源程序_chenjie\3.上位机源程序\2.可用\优化版本\7.海洋牧场上位机_0518\OSNSystem\OSNSystem\obj\x86\Debug\OSNSystem.Main.resources
D:\源程序_chenjie\3.上位机源程序\2.可用\优化版本\7.海洋牧场上位机_0518\OSNSystem\OSNSystem\obj\x86\Debug\OSNSystem.Properties.Resources.resources
D:\源程序_chenjie\3.上位机源程序\2.可用\优化版本\7.海洋牧场上位机_0518\OSNSystem\OSNSystem\obj\x86\Debug\OSNSystem.SensorConfig.resources
D:\源程序_chenjie\3.上位机源程序\2.可用\优化版本\7.海洋牧场上位机_0518\OSNSystem\OSNSystem\obj\x86\Debug\OSNSystem.SetCamera.resources
D:\源程序_chenjie\3.上位机源程序\2.可用\优化版本\7.海洋牧场上位机_0518\OSNSystem\OSNSystem\obj\x86\Debug\OSNSystem.SetCTD.resources
D:\源程序_chenjie\3.上位机源程序\2.可用\优化版本\7.海洋牧场上位机_0518\OSNSystem\OSNSystem\obj\x86\Debug\OSNSystem.SetDO.resources
D:\源程序_chenjie\3.上位机源程序\2.可用\优化版本\7.海洋牧场上位机_0518\OSNSystem\OSNSystem\obj\x86\Debug\OSNSystem.SetMulti.resources
D:\源程序_chenjie\3.上位机源程序\2.可用\优化版本\7.海洋牧场上位机_0518\OSNSystem\OSNSystem\obj\x86\Debug\OSNSystem.SetPicScope.resources
D:\源程序_chenjie\3.上位机源程序\2.可用\优化版本\7.海洋牧场上位机_0518\OSNSystem\OSNSystem\obj\x86\Debug\OSNSystem.ShowCTDFigure.resources
D:\源程序_chenjie\3.上位机源程序\2.可用\优化版本\7.海洋牧场上位机_0518\OSNSystem\OSNSystem\obj\x86\Debug\OSNSystem.csproj.GenerateResource.Cache
D:\源程序_chenjie\3.上位机源程序\2.可用\优化版本\8\OSNSystem\OSNSystem\bin\Debug\OSNSystem.exe.config
D:\源程序_chenjie\3.上位机源程序\2.可用\优化版本\8\OSNSystem\OSNSystem\obj\x86\Debug\OSNSystem.exe
D:\源程序_chenjie\3.上位机源程序\2.可用\优化版本\8\OSNSystem\OSNSystem\obj\x86\Debug\OSNSystem.pdb
D:\源程序_chenjie\3.上位机源程序\2.可用\优化版本\8\OSNSystem\OSNSystem\bin\Debug\OSNSystem.exe
D:\源程序_chenjie\3.上位机源程序\2.可用\优化版本\8\OSNSystem\OSNSystem\bin\Debug\OSNSystem.pdb
D:\源程序_chenjie\3.上位机源程序\2.可用\优化版本\8\OSNSystem\OSNSystem\bin\Debug\mysql.data.dll
D:\源程序_chenjie\3.上位机源程序\2.可用\优化版本\8\OSNSystem\OSNSystem\bin\Debug\TeeChart.dll
D:\源程序_chenjie\3.上位机源程序\2.可用\优化版本\8\OSNSystem\OSNSystem\bin\Debug\TeeChart.xml
D:\源程序_chenjie\3.上位机源程序\2.可用\优化版本\8\OSNSystem\OSNSystem\obj\x86\Debug\OSNSystem.csprojResolveAssemblyReference.cache
D:\源程序_chenjie\3.上位机源程序\2.可用\优化版本\8\OSNSystem\OSNSystem\obj\x86\Debug\OSNSystem.cmdCollectSet.resources
D:\源程序_chenjie\3.上位机源程序\2.可用\优化版本\8\OSNSystem\OSNSystem\obj\x86\Debug\OSNSystem.cmdSet.resources
D:\源程序_chenjie\3.上位机源程序\2.可用\优化版本\8\OSNSystem\OSNSystem\obj\x86\Debug\OSNSystem.Form1.resources
D:\源程序_chenjie\3.上位机源程序\2.可用\优化版本\8\OSNSystem\OSNSystem\obj\x86\Debug\OSNSystem.Main.resources
D:\源程序_chenjie\3.上位机源程序\2.可用\优化版本\8\OSNSystem\OSNSystem\obj\x86\Debug\OSNSystem.Properties.Resources.resources
D:\源程序_chenjie\3.上位机源程序\2.可用\优化版本\8\OSNSystem\OSNSystem\obj\x86\Debug\OSNSystem.SensorConfig.resources
D:\源程序_chenjie\3.上位机源程序\2.可用\优化版本\8\OSNSystem\OSNSystem\obj\x86\Debug\OSNSystem.SetCamera.resources
D:\源程序_chenjie\3.上位机源程序\2.可用\优化版本\8\OSNSystem\OSNSystem\obj\x86\Debug\OSNSystem.SetCTD.resources
D:\源程序_chenjie\3.上位机源程序\2.可用\优化版本\8\OSNSystem\OSNSystem\obj\x86\Debug\OSNSystem.SetDO.resources
D:\源程序_chenjie\3.上位机源程序\2.可用\优化版本\8\OSNSystem\OSNSystem\obj\x86\Debug\OSNSystem.SetMulti.resources
D:\源程序_chenjie\3.上位机源程序\2.可用\优化版本\8\OSNSystem\OSNSystem\obj\x86\Debug\OSNSystem.SetPicScope.resources
D:\源程序_chenjie\3.上位机源程序\2.可用\优化版本\8\OSNSystem\OSNSystem\obj\x86\Debug\OSNSystem.ShowCTDFigure.resources
D:\源程序_chenjie\3.上位机源程序\2.可用\优化版本\8\OSNSystem\OSNSystem\obj\x86\Debug\OSNSystem.csproj.GenerateResource.Cache
C:\Users\Administrator\Desktop\接驳盒上位机 - 副本\工控机运行版本优化\OSNSystem\OSNSystem\bin\Debug\OSNSystem.exe.config
C:\Users\Administrator\Desktop\接驳盒上位机 - 副本\工控机运行版本优化\OSNSystem\OSNSystem\obj\x86\Debug\OSNSystem.exe
C:\Users\Administrator\Desktop\接驳盒上位机 - 副本\工控机运行版本优化\OSNSystem\OSNSystem\obj\x86\Debug\OSNSystem.pdb
C:\Users\Administrator\Desktop\接驳盒上位机 - 副本\工控机运行版本优化\OSNSystem\OSNSystem\bin\Debug\OSNSystem.exe
C:\Users\Administrator\Desktop\接驳盒上位机 - 副本\工控机运行版本优化\OSNSystem\OSNSystem\bin\Debug\OSNSystem.pdb
C:\Users\Administrator\Desktop\接驳盒上位机 - 副本\工控机运行版本优化\OSNSystem\OSNSystem\bin\Debug\mysql.data.dll
C:\Users\Administrator\Desktop\接驳盒上位机 - 副本\工控机运行版本优化\OSNSystem\OSNSystem\bin\Debug\TeeChart.dll
C:\Users\Administrator\Desktop\接驳盒上位机 - 副本\工控机运行版本优化\OSNSystem\OSNSystem\bin\Debug\TeeChart.xml
C:\Users\Administrator\Desktop\接驳盒上位机 - 副本\工控机运行版本优化\OSNSystem\OSNSystem\obj\x86\Debug\OSNSystem.csprojResolveAssemblyReference.cache
C:\Users\Administrator\Desktop\接驳盒上位机 - 副本\工控机运行版本优化\OSNSystem\OSNSystem\obj\x86\Debug\OSNSystem.cmdCollectSet.resources
C:\Users\Administrator\Desktop\接驳盒上位机 - 副本\工控机运行版本优化\OSNSystem\OSNSystem\obj\x86\Debug\OSNSystem.cmdSet.resources
C:\Users\Administrator\Desktop\接驳盒上位机 - 副本\工控机运行版本优化\OSNSystem\OSNSystem\obj\x86\Debug\OSNSystem.Form1.resources
C:\Users\Administrator\Desktop\接驳盒上位机 - 副本\工控机运行版本优化\OSNSystem\OSNSystem\obj\x86\Debug\OSNSystem.Main.resources
C:\Users\Administrator\Desktop\接驳盒上位机 - 副本\工控机运行版本优化\OSNSystem\OSNSystem\obj\x86\Debug\OSNSystem.Properties.Resources.resources
C:\Users\Administrator\Desktop\接驳盒上位机 - 副本\工控机运行版本优化\OSNSystem\OSNSystem\obj\x86\Debug\OSNSystem.SensorConfig.resources
C:\Users\Administrator\Desktop\接驳盒上位机 - 副本\工控机运行版本优化\OSNSystem\OSNSystem\obj\x86\Debug\OSNSystem.SetCamera.resources
C:\Users\Administrator\Desktop\接驳盒上位机 - 副本\工控机运行版本优化\OSNSystem\OSNSystem\obj\x86\Debug\OSNSystem.SetCTD.resources
C:\Users\Administrator\Desktop\接驳盒上位机 - 副本\工控机运行版本优化\OSNSystem\OSNSystem\obj\x86\Debug\OSNSystem.SetDO.resources
C:\Users\Administrator\Desktop\接驳盒上位机 - 副本\工控机运行版本优化\OSNSystem\OSNSystem\obj\x86\Debug\OSNSystem.SetMulti.resources
C:\Users\Administrator\Desktop\接驳盒上位机 - 副本\工控机运行版本优化\OSNSystem\OSNSystem\obj\x86\Debug\OSNSystem.SetPicScope.resources
C:\Users\Administrator\Desktop\接驳盒上位机 - 副本\工控机运行版本优化\OSNSystem\OSNSystem\obj\x86\Debug\OSNSystem.ShowCTDFigure.resources
C:\Users\Administrator\Desktop\接驳盒上位机 - 副本\工控机运行版本优化\OSNSystem\OSNSystem\obj\x86\Debug\OSNSystem.csproj.GenerateResource.Cache
D:\源程序_chenjie\3.上位机源程序\2.可用\优化版本\9.多参数优化\OSNSystem\OSNSystem\bin\Debug\OSNSystem.exe.config
D:\源程序_chenjie\3.上位机源程序\2.可用\优化版本\9.多参数优化\OSNSystem\OSNSystem\obj\x86\Debug\OSNSystem.exe
D:\源程序_chenjie\3.上位机源程序\2.可用\优化版本\9.多参数优化\OSNSystem\OSNSystem\obj\x86\Debug\OSNSystem.pdb
D:\源程序_chenjie\3.上位机源程序\2.可用\优化版本\9.多参数优化\OSNSystem\OSNSystem\bin\Debug\OSNSystem.exe
D:\源程序_chenjie\3.上位机源程序\2.可用\优化版本\9.多参数优化\OSNSystem\OSNSystem\bin\Debug\OSNSystem.pdb
D:\源程序_chenjie\3.上位机源程序\2.可用\优化版本\9.多参数优化\OSNSystem\OSNSystem\bin\Debug\mysql.data.dll
D:\源程序_chenjie\3.上位机源程序\2.可用\优化版本\9.多参数优化\OSNSystem\OSNSystem\bin\Debug\TeeChart.dll
D:\源程序_chenjie\3.上位机源程序\2.可用\优化版本\9.多参数优化\OSNSystem\OSNSystem\bin\Debug\TeeChart.xml
D:\源程序_chenjie\3.上位机源程序\2.可用\优化版本\9.多参数优化\OSNSystem\OSNSystem\obj\x86\Debug\OSNSystem.csprojResolveAssemblyReference.cache
D:\源程序_chenjie\3.上位机源程序\2.可用\优化版本\9.多参数优化\OSNSystem\OSNSystem\obj\x86\Debug\OSNSystem.cmdCollectSet.resources
D:\源程序_chenjie\3.上位机源程序\2.可用\优化版本\9.多参数优化\OSNSystem\OSNSystem\obj\x86\Debug\OSNSystem.cmdSet.resources
D:\源程序_chenjie\3.上位机源程序\2.可用\优化版本\9.多参数优化\OSNSystem\OSNSystem\obj\x86\Debug\OSNSystem.Form1.resources
D:\源程序_chenjie\3.上位机源程序\2.可用\优化版本\9.多参数优化\OSNSystem\OSNSystem\obj\x86\Debug\OSNSystem.Main.resources
D:\源程序_chenjie\3.上位机源程序\2.可用\优化版本\9.多参数优化\OSNSystem\OSNSystem\obj\x86\Debug\OSNSystem.Properties.Resources.resources
D:\源程序_chenjie\3.上位机源程序\2.可用\优化版本\9.多参数优化\OSNSystem\OSNSystem\obj\x86\Debug\OSNSystem.SensorConfig.resources
D:\源程序_chenjie\3.上位机源程序\2.可用\优化版本\9.多参数优化\OSNSystem\OSNSystem\obj\x86\Debug\OSNSystem.SetCamera.resources
D:\源程序_chenjie\3.上位机源程序\2.可用\优化版本\9.多参数优化\OSNSystem\OSNSystem\obj\x86\Debug\OSNSystem.SetCTD.resources
D:\源程序_chenjie\3.上位机源程序\2.可用\优化版本\9.多参数优化\OSNSystem\OSNSystem\obj\x86\Debug\OSNSystem.SetDO.resources
D:\源程序_chenjie\3.上位机源程序\2.可用\优化版本\9.多参数优化\OSNSystem\OSNSystem\obj\x86\Debug\OSNSystem.SetMulti.resources
D:\源程序_chenjie\3.上位机源程序\2.可用\优化版本\9.多参数优化\OSNSystem\OSNSystem\obj\x86\Debug\OSNSystem.SetPicScope.resources
D:\源程序_chenjie\3.上位机源程序\2.可用\优化版本\9.多参数优化\OSNSystem\OSNSystem\obj\x86\Debug\OSNSystem.ShowCTDFigure.resources
D:\源程序_chenjie\3.上位机源程序\2.可用\优化版本\9.多参数优化\OSNSystem\OSNSystem\obj\x86\Debug\OSNSystem.csproj.GenerateResource.Cache
D:\源程序_chenjie\3.上位机源程序\2.可用\优化版本\10.datagridview不可排序\OSNSystem\OSNSystem\bin\Debug\OSNSystem.exe.config
D:\源程序_chenjie\3.上位机源程序\2.可用\优化版本\10.datagridview不可排序\OSNSystem\OSNSystem\obj\x86\Debug\OSNSystem.exe
D:\源程序_chenjie\3.上位机源程序\2.可用\优化版本\10.datagridview不可排序\OSNSystem\OSNSystem\obj\x86\Debug\OSNSystem.pdb
F:\1.xiangmu\4.接驳盒\2.源代码\3.上位机源代码\1.CS架构final版本\工控机成功运行版本\10.datagridview不可排序\OSNSystem\OSNSystem\bin\Debug\OSNSystem.exe.config
F:\1.xiangmu\4.接驳盒\2.源代码\3.上位机源代码\1.CS架构final版本\工控机成功运行版本\10.datagridview不可排序\OSNSystem\OSNSystem\obj\x86\Debug\OSNSystem.exe
F:\1.xiangmu\4.接驳盒\2.源代码\3.上位机源代码\1.CS架构final版本\工控机成功运行版本\10.datagridview不可排序\OSNSystem\OSNSystem\obj\x86\Debug\OSNSystem.pdb
F:\1.xiangmu\4.接驳盒\2.源代码\3.上位机源代码\1.CS架构final版本\工控机成功运行版本\10.datagridview不可排序\OSNSystem\OSNSystem\bin\Debug\OSNSystem.exe
F:\1.xiangmu\4.接驳盒\2.源代码\3.上位机源代码\1.CS架构final版本\工控机成功运行版本\10.datagridview不可排序\OSNSystem\OSNSystem\bin\Debug\OSNSystem.pdb
F:\1.xiangmu\4.接驳盒\2.源代码\3.上位机源代码\1.CS架构final版本\工控机成功运行版本\10.datagridview不可排序\OSNSystem\OSNSystem\bin\Debug\mysql.data.dll
F:\1.xiangmu\4.接驳盒\2.源代码\3.上位机源代码\1.CS架构final版本\工控机成功运行版本\10.datagridview不可排序\OSNSystem\OSNSystem\bin\Debug\TeeChart.dll
F:\1.xiangmu\4.接驳盒\2.源代码\3.上位机源代码\1.CS架构final版本\工控机成功运行版本\10.datagridview不可排序\OSNSystem\OSNSystem\bin\Debug\TeeChart.xml
F:\1.xiangmu\4.接驳盒\2.源代码\3.上位机源代码\1.CS架构final版本\工控机成功运行版本\10.datagridview不可排序\OSNSystem\OSNSystem\obj\x86\Debug\OSNSystem.csprojResolveAssemblyReference.cache
F:\1.xiangmu\4.接驳盒\2.源代码\3.上位机源代码\1.CS架构final版本\工控机成功运行版本\10.datagridview不可排序\OSNSystem\OSNSystem\obj\x86\Debug\OSNSystem.cmdCollectSet.resources
F:\1.xiangmu\4.接驳盒\2.源代码\3.上位机源代码\1.CS架构final版本\工控机成功运行版本\10.datagridview不可排序\OSNSystem\OSNSystem\obj\x86\Debug\OSNSystem.cmdSet.resources
F:\1.xiangmu\4.接驳盒\2.源代码\3.上位机源代码\1.CS架构final版本\工控机成功运行版本\10.datagridview不可排序\OSNSystem\OSNSystem\obj\x86\Debug\OSNSystem.Form1.resources
F:\1.xiangmu\4.接驳盒\2.源代码\3.上位机源代码\1.CS架构final版本\工控机成功运行版本\10.datagridview不可排序\OSNSystem\OSNSystem\obj\x86\Debug\OSNSystem.Main.resources
F:\1.xiangmu\4.接驳盒\2.源代码\3.上位机源代码\1.CS架构final版本\工控机成功运行版本\10.datagridview不可排序\OSNSystem\OSNSystem\obj\x86\Debug\OSNSystem.Properties.Resources.resources
F:\1.xiangmu\4.接驳盒\2.源代码\3.上位机源代码\1.CS架构final版本\工控机成功运行版本\10.datagridview不可排序\OSNSystem\OSNSystem\obj\x86\Debug\OSNSystem.SensorConfig.resources
F:\1.xiangmu\4.接驳盒\2.源代码\3.上位机源代码\1.CS架构final版本\工控机成功运行版本\10.datagridview不可排序\OSNSystem\OSNSystem\obj\x86\Debug\OSNSystem.SetCamera.resources
F:\1.xiangmu\4.接驳盒\2.源代码\3.上位机源代码\1.CS架构final版本\工控机成功运行版本\10.datagridview不可排序\OSNSystem\OSNSystem\obj\x86\Debug\OSNSystem.SetCTD.resources
F:\1.xiangmu\4.接驳盒\2.源代码\3.上位机源代码\1.CS架构final版本\工控机成功运行版本\10.datagridview不可排序\OSNSystem\OSNSystem\obj\x86\Debug\OSNSystem.SetDO.resources
F:\1.xiangmu\4.接驳盒\2.源代码\3.上位机源代码\1.CS架构final版本\工控机成功运行版本\10.datagridview不可排序\OSNSystem\OSNSystem\obj\x86\Debug\OSNSystem.SetMulti.resources
F:\1.xiangmu\4.接驳盒\2.源代码\3.上位机源代码\1.CS架构final版本\工控机成功运行版本\10.datagridview不可排序\OSNSystem\OSNSystem\obj\x86\Debug\OSNSystem.SetPicScope.resources
F:\1.xiangmu\4.接驳盒\2.源代码\3.上位机源代码\1.CS架构final版本\工控机成功运行版本\10.datagridview不可排序\OSNSystem\OSNSystem\obj\x86\Debug\OSNSystem.ShowCTDFigure.resources
F:\1.xiangmu\4.接驳盒\2.源代码\3.上位机源代码\1.CS架构final版本\工控机成功运行版本\10.datagridview不可排序\OSNSystem\OSNSystem\obj\x86\Debug\OSNSystem.csproj.GenerateResource.Cache
C:\Users\Administrator\Desktop\工控机成功运行版本\10.datagridview不可排序\OSNSystem\OSNSystem\bin\Debug\OSNSystem.exe.config
C:\Users\Administrator\Desktop\工控机成功运行版本\10.datagridview不可排序\OSNSystem\OSNSystem\obj\x86\Debug\OSNSystem.exe
C:\Users\Administrator\Desktop\工控机成功运行版本\10.datagridview不可排序\OSNSystem\OSNSystem\obj\x86\Debug\OSNSystem.pdb
C:\Users\Administrator\Desktop\工控机成功运行版本\10.datagridview不可排序\OSNSystem\OSNSystem\bin\Debug\OSNSystem.exe
C:\Users\Administrator\Desktop\工控机成功运行版本\10.datagridview不可排序\OSNSystem\OSNSystem\bin\Debug\OSNSystem.pdb
C:\Users\Administrator\Desktop\工控机成功运行版本\10.datagridview不可排序\OSNSystem\OSNSystem\bin\Debug\mysql.data.dll
C:\Users\Administrator\Desktop\工控机成功运行版本\10.datagridview不可排序\OSNSystem\OSNSystem\bin\Debug\TeeChart.dll
C:\Users\Administrator\Desktop\工控机成功运行版本\10.datagridview不可排序\OSNSystem\OSNSystem\bin\Debug\TeeChart.xml
C:\Users\Administrator\Desktop\工控机成功运行版本\10.datagridview不可排序\OSNSystem\OSNSystem\obj\x86\Debug\OSNSystem.cmdCollectSet.resources
C:\Users\Administrator\Desktop\工控机成功运行版本\10.datagridview不可排序\OSNSystem\OSNSystem\obj\x86\Debug\OSNSystem.cmdSet.resources
C:\Users\Administrator\Desktop\工控机成功运行版本\10.datagridview不可排序\OSNSystem\OSNSystem\obj\x86\Debug\OSNSystem.Form1.resources
C:\Users\Administrator\Desktop\工控机成功运行版本\10.datagridview不可排序\OSNSystem\OSNSystem\obj\x86\Debug\OSNSystem.Main.resources
C:\Users\Administrator\Desktop\工控机成功运行版本\10.datagridview不可排序\OSNSystem\OSNSystem\obj\x86\Debug\OSNSystem.Properties.Resources.resources
C:\Users\Administrator\Desktop\工控机成功运行版本\10.datagridview不可排序\OSNSystem\OSNSystem\obj\x86\Debug\OSNSystem.SensorConfig.resources
C:\Users\Administrator\Desktop\工控机成功运行版本\10.datagridview不可排序\OSNSystem\OSNSystem\obj\x86\Debug\OSNSystem.SetCamera.resources
C:\Users\Administrator\Desktop\工控机成功运行版本\10.datagridview不可排序\OSNSystem\OSNSystem\obj\x86\Debug\OSNSystem.SetCTD.resources
C:\Users\Administrator\Desktop\工控机成功运行版本\10.datagridview不可排序\OSNSystem\OSNSystem\obj\x86\Debug\OSNSystem.SetDO.resources
C:\Users\Administrator\Desktop\工控机成功运行版本\10.datagridview不可排序\OSNSystem\OSNSystem\obj\x86\Debug\OSNSystem.SetMulti.resources
C:\Users\Administrator\Desktop\工控机成功运行版本\10.datagridview不可排序\OSNSystem\OSNSystem\obj\x86\Debug\OSNSystem.SetPicScope.resources
C:\Users\Administrator\Desktop\工控机成功运行版本\10.datagridview不可排序\OSNSystem\OSNSystem\obj\x86\Debug\OSNSystem.ShowCTDFigure.resources
C:\Users\Administrator\Desktop\工控机成功运行版本\10.datagridview不可排序\OSNSystem\OSNSystem\obj\x86\Debug\OSNSystem.csprojResolveAssemblyReference.cache
C:\Users\Administrator\Desktop\工控机成功运行版本\10.datagridview不可排序\OSNSystem\OSNSystem\obj\x86\Debug\OSNSystem.csproj.GenerateResource.Cache
C:\Users\Administrator\Desktop\STM32&上位机程序\上位机\OSNSystem\OSNSystem\bin\Debug\OSNSystem.exe.config
C:\Users\Administrator\Desktop\STM32&上位机程序\上位机\OSNSystem\OSNSystem\obj\x86\Debug\OSNSystem.exe
C:\Users\Administrator\Desktop\STM32&上位机程序\上位机\OSNSystem\OSNSystem\obj\x86\Debug\OSNSystem.pdb
C:\Users\Administrator\Desktop\STM32&上位机程序\上位机\OSNSystem\OSNSystem\bin\Debug\OSNSystem.exe
C:\Users\Administrator\Desktop\STM32&上位机程序\上位机\OSNSystem\OSNSystem\bin\Debug\OSNSystem.pdb
C:\Users\Administrator\Desktop\STM32&上位机程序\上位机\OSNSystem\OSNSystem\bin\Debug\mysql.data.dll
C:\Users\Administrator\Desktop\STM32&上位机程序\上位机\OSNSystem\OSNSystem\bin\Debug\TeeChart.dll
C:\Users\Administrator\Desktop\STM32&上位机程序\上位机\OSNSystem\OSNSystem\bin\Debug\TeeChart.xml
C:\Users\Administrator\Desktop\STM32&上位机程序\上位机\OSNSystem\OSNSystem\obj\x86\Debug\OSNSystem.csprojResolveAssemblyReference.cache
C:\Users\Administrator\Desktop\STM32&上位机程序\上位机\OSNSystem\OSNSystem\obj\x86\Debug\OSNSystem.cmdCollectSet.resources
C:\Users\Administrator\Desktop\STM32&上位机程序\上位机\OSNSystem\OSNSystem\obj\x86\Debug\OSNSystem.cmdSet.resources
C:\Users\Administrator\Desktop\STM32&上位机程序\上位机\OSNSystem\OSNSystem\obj\x86\Debug\OSNSystem.Form1.resources
C:\Users\Administrator\Desktop\STM32&上位机程序\上位机\OSNSystem\OSNSystem\obj\x86\Debug\OSNSystem.Main.resources
C:\Users\Administrator\Desktop\STM32&上位机程序\上位机\OSNSystem\OSNSystem\obj\x86\Debug\OSNSystem.Properties.Resources.resources
C:\Users\Administrator\Desktop\STM32&上位机程序\上位机\OSNSystem\OSNSystem\obj\x86\Debug\OSNSystem.SensorConfig.resources
C:\Users\Administrator\Desktop\STM32&上位机程序\上位机\OSNSystem\OSNSystem\obj\x86\Debug\OSNSystem.SetCamera.resources
C:\Users\Administrator\Desktop\STM32&上位机程序\上位机\OSNSystem\OSNSystem\obj\x86\Debug\OSNSystem.SetCTD.resources
C:\Users\Administrator\Desktop\STM32&上位机程序\上位机\OSNSystem\OSNSystem\obj\x86\Debug\OSNSystem.SetDO.resources
C:\Users\Administrator\Desktop\STM32&上位机程序\上位机\OSNSystem\OSNSystem\obj\x86\Debug\OSNSystem.SetMulti.resources
C:\Users\Administrator\Desktop\STM32&上位机程序\上位机\OSNSystem\OSNSystem\obj\x86\Debug\OSNSystem.SetPicScope.resources
C:\Users\Administrator\Desktop\STM32&上位机程序\上位机\OSNSystem\OSNSystem\obj\x86\Debug\OSNSystem.ShowCTDFigure.resources
C:\Users\Administrator\Desktop\STM32&上位机程序\上位机\OSNSystem\OSNSystem\obj\x86\Debug\OSNSystem.csproj.GenerateResource.Cache
C:\Users\Administrator\Desktop\串口服务器及上位机程序\上位机\OSNSystem\OSNSystem\bin\Debug\OSNSystem.exe.config
C:\Users\Administrator\Desktop\串口服务器及上位机程序\上位机\OSNSystem\OSNSystem\obj\x86\Debug\OSNSystem.exe
C:\Users\Administrator\Desktop\串口服务器及上位机程序\上位机\OSNSystem\OSNSystem\obj\x86\Debug\OSNSystem.pdb
C:\Users\Administrator\Desktop\串口服务器及上位机程序\上位机\OSNSystem\OSNSystem\bin\Debug\OSNSystem.exe
C:\Users\Administrator\Desktop\串口服务器及上位机程序\上位机\OSNSystem\OSNSystem\bin\Debug\OSNSystem.pdb
C:\Users\Administrator\Desktop\串口服务器及上位机程序\上位机\OSNSystem\OSNSystem\bin\Debug\mysql.data.dll
C:\Users\Administrator\Desktop\串口服务器及上位机程序\上位机\OSNSystem\OSNSystem\bin\Debug\TeeChart.dll
C:\Users\Administrator\Desktop\串口服务器及上位机程序\上位机\OSNSystem\OSNSystem\bin\Debug\TeeChart.xml
C:\Users\Administrator\Desktop\串口服务器及上位机程序\上位机\OSNSystem\OSNSystem\obj\x86\Debug\OSNSystem.csprojResolveAssemblyReference.cache
C:\Users\Administrator\Desktop\串口服务器及上位机程序\上位机\OSNSystem\OSNSystem\obj\x86\Debug\OSNSystem.cmdCollectSet.resources
C:\Users\Administrator\Desktop\串口服务器及上位机程序\上位机\OSNSystem\OSNSystem\obj\x86\Debug\OSNSystem.cmdSet.resources
C:\Users\Administrator\Desktop\串口服务器及上位机程序\上位机\OSNSystem\OSNSystem\obj\x86\Debug\OSNSystem.Form1.resources
C:\Users\Administrator\Desktop\串口服务器及上位机程序\上位机\OSNSystem\OSNSystem\obj\x86\Debug\OSNSystem.Main.resources
C:\Users\Administrator\Desktop\串口服务器及上位机程序\上位机\OSNSystem\OSNSystem\obj\x86\Debug\OSNSystem.Properties.Resources.resources
C:\Users\Administrator\Desktop\串口服务器及上位机程序\上位机\OSNSystem\OSNSystem\obj\x86\Debug\OSNSystem.SensorConfig.resources
C:\Users\Administrator\Desktop\串口服务器及上位机程序\上位机\OSNSystem\OSNSystem\obj\x86\Debug\OSNSystem.SetCamera.resources
C:\Users\Administrator\Desktop\串口服务器及上位机程序\上位机\OSNSystem\OSNSystem\obj\x86\Debug\OSNSystem.SetCTD.resources
C:\Users\Administrator\Desktop\串口服务器及上位机程序\上位机\OSNSystem\OSNSystem\obj\x86\Debug\OSNSystem.SetDO.resources
C:\Users\Administrator\Desktop\串口服务器及上位机程序\上位机\OSNSystem\OSNSystem\obj\x86\Debug\OSNSystem.SetMulti.resources
C:\Users\Administrator\Desktop\串口服务器及上位机程序\上位机\OSNSystem\OSNSystem\obj\x86\Debug\OSNSystem.SetPicScope.resources
C:\Users\Administrator\Desktop\串口服务器及上位机程序\上位机\OSNSystem\OSNSystem\obj\x86\Debug\OSNSystem.ShowCTDFigure.resources
C:\Users\Administrator\Desktop\串口服务器及上位机程序\上位机\OSNSystem\OSNSystem\obj\x86\Debug\OSNSystem.csproj.GenerateResource.Cache
C:\Users\Administrator\Desktop\双串口服务器监测高压舱以及次接驳盒上位机程序\上位机\OSNSystem\OSNSystem\bin\Debug\OSNSystem.exe.config
C:\Users\Administrator\Desktop\双串口服务器监测高压舱以及次接驳盒上位机程序\上位机\OSNSystem\OSNSystem\obj\x86\Debug\OSNSystem.exe
C:\Users\Administrator\Desktop\双串口服务器监测高压舱以及次接驳盒上位机程序\上位机\OSNSystem\OSNSystem\obj\x86\Debug\OSNSystem.pdb
C:\Users\Administrator\Desktop\双串口服务器监测高压舱以及次接驳盒上位机程序\上位机\OSNSystem\OSNSystem\bin\Debug\OSNSystem.exe
C:\Users\Administrator\Desktop\双串口服务器监测高压舱以及次接驳盒上位机程序\上位机\OSNSystem\OSNSystem\bin\Debug\OSNSystem.pdb
C:\Users\Administrator\Desktop\双串口服务器监测高压舱以及次接驳盒上位机程序\上位机\OSNSystem\OSNSystem\bin\Debug\mysql.data.dll
C:\Users\Administrator\Desktop\双串口服务器监测高压舱以及次接驳盒上位机程序\上位机\OSNSystem\OSNSystem\bin\Debug\TeeChart.dll
C:\Users\Administrator\Desktop\双串口服务器监测高压舱以及次接驳盒上位机程序\上位机\OSNSystem\OSNSystem\bin\Debug\TeeChart.xml
C:\Users\Administrator\Desktop\双串口服务器监测高压舱以及次接驳盒上位机程序\上位机\OSNSystem\OSNSystem\obj\x86\Debug\OSNSystem.csprojResolveAssemblyReference.cache
C:\Users\Administrator\Desktop\双串口服务器监测高压舱以及次接驳盒上位机程序\上位机\OSNSystem\OSNSystem\obj\x86\Debug\OSNSystem.cmdCollectSet.resources
C:\Users\Administrator\Desktop\双串口服务器监测高压舱以及次接驳盒上位机程序\上位机\OSNSystem\OSNSystem\obj\x86\Debug\OSNSystem.cmdSet.resources
C:\Users\Administrator\Desktop\双串口服务器监测高压舱以及次接驳盒上位机程序\上位机\OSNSystem\OSNSystem\obj\x86\Debug\OSNSystem.Form1.resources
C:\Users\Administrator\Desktop\双串口服务器监测高压舱以及次接驳盒上位机程序\上位机\OSNSystem\OSNSystem\obj\x86\Debug\OSNSystem.Main.resources
C:\Users\Administrator\Desktop\双串口服务器监测高压舱以及次接驳盒上位机程序\上位机\OSNSystem\OSNSystem\obj\x86\Debug\OSNSystem.Properties.Resources.resources
C:\Users\Administrator\Desktop\双串口服务器监测高压舱以及次接驳盒上位机程序\上位机\OSNSystem\OSNSystem\obj\x86\Debug\OSNSystem.SensorConfig.resources
C:\Users\Administrator\Desktop\双串口服务器监测高压舱以及次接驳盒上位机程序\上位机\OSNSystem\OSNSystem\obj\x86\Debug\OSNSystem.SetCamera.resources
C:\Users\Administrator\Desktop\双串口服务器监测高压舱以及次接驳盒上位机程序\上位机\OSNSystem\OSNSystem\obj\x86\Debug\OSNSystem.SetCTD.resources
C:\Users\Administrator\Desktop\双串口服务器监测高压舱以及次接驳盒上位机程序\上位机\OSNSystem\OSNSystem\obj\x86\Debug\OSNSystem.SetDO.resources
C:\Users\Administrator\Desktop\双串口服务器监测高压舱以及次接驳盒上位机程序\上位机\OSNSystem\OSNSystem\obj\x86\Debug\OSNSystem.SetMulti.resources
C:\Users\Administrator\Desktop\双串口服务器监测高压舱以及次接驳盒上位机程序\上位机\OSNSystem\OSNSystem\obj\x86\Debug\OSNSystem.SetPicScope.resources
C:\Users\Administrator\Desktop\双串口服务器监测高压舱以及次接驳盒上位机程序\上位机\OSNSystem\OSNSystem\obj\x86\Debug\OSNSystem.ShowCTDFigure.resources
C:\Users\Administrator\Desktop\双串口服务器监测高压舱以及次接驳盒上位机程序\上位机\OSNSystem\OSNSystem\obj\x86\Debug\OSNSystem.csproj.GenerateResource.Cache
C:\Users\Administrator\Desktop\test\OSNSystem\OSNSystem\bin\Debug\OSNSystem.exe.config
C:\Users\Administrator\Desktop\test\OSNSystem\OSNSystem\obj\x86\Debug\OSNSystem.exe
C:\Users\Administrator\Desktop\test\OSNSystem\OSNSystem\obj\x86\Debug\OSNSystem.pdb
C:\Users\Administrator\Desktop\test\OSNSystem\OSNSystem\bin\Debug\OSNSystem.exe
C:\Users\Administrator\Desktop\test\OSNSystem\OSNSystem\bin\Debug\OSNSystem.pdb
C:\Users\Administrator\Desktop\test\OSNSystem\OSNSystem\bin\Debug\mysql.data.dll
C:\Users\Administrator\Desktop\test\OSNSystem\OSNSystem\bin\Debug\TeeChart.dll
C:\Users\Administrator\Desktop\test\OSNSystem\OSNSystem\bin\Debug\TeeChart.xml
C:\Users\Administrator\Desktop\test\OSNSystem\OSNSystem\obj\x86\Debug\OSNSystem.csprojResolveAssemblyReference.cache
C:\Users\Administrator\Desktop\test\OSNSystem\OSNSystem\obj\x86\Debug\OSNSystem.cmdCollectSet.resources
C:\Users\Administrator\Desktop\test\OSNSystem\OSNSystem\obj\x86\Debug\OSNSystem.cmdSet.resources
C:\Users\Administrator\Desktop\test\OSNSystem\OSNSystem\obj\x86\Debug\OSNSystem.Main.resources
C:\Users\Administrator\Desktop\test\OSNSystem\OSNSystem\obj\x86\Debug\OSNSystem.Properties.Resources.resources
C:\Users\Administrator\Desktop\test\OSNSystem\OSNSystem\obj\x86\Debug\OSNSystem.SensorConfig.resources
C:\Users\Administrator\Desktop\test\OSNSystem\OSNSystem\obj\x86\Debug\OSNSystem.SetCamera.resources
C:\Users\Administrator\Desktop\test\OSNSystem\OSNSystem\obj\x86\Debug\OSNSystem.SetCTD.resources
C:\Users\Administrator\Desktop\test\OSNSystem\OSNSystem\obj\x86\Debug\OSNSystem.SetDO.resources
C:\Users\Administrator\Desktop\test\OSNSystem\OSNSystem\obj\x86\Debug\OSNSystem.SetMulti.resources
C:\Users\Administrator\Desktop\test\OSNSystem\OSNSystem\obj\x86\Debug\OSNSystem.SetPicScope.resources
C:\Users\Administrator\Desktop\test\OSNSystem\OSNSystem\obj\x86\Debug\OSNSystem.ShowCTDFigure.resources
C:\Users\Administrator\Desktop\test\OSNSystem\OSNSystem\obj\x86\Debug\OSNSystem.csproj.GenerateResource.Cache
C:\Users\Administrator\Desktop\双透传模块方案上位机程序V2.0\OSNSystem\OSNSystem\bin\Debug\OSNSystem.exe.config
C:\Users\Administrator\Desktop\双透传模块方案上位机程序V2.0\OSNSystem\OSNSystem\obj\x86\Debug\OSNSystem.exe
C:\Users\Administrator\Desktop\双透传模块方案上位机程序V2.0\OSNSystem\OSNSystem\obj\x86\Debug\OSNSystem.pdb
C:\Users\Administrator\Desktop\双透传模块方案上位机程序V2.0\OSNSystem\OSNSystem\bin\Debug\OSNSystem.exe
C:\Users\Administrator\Desktop\双透传模块方案上位机程序V2.0\OSNSystem\OSNSystem\bin\Debug\OSNSystem.pdb
C:\Users\Administrator\Desktop\双透传模块方案上位机程序V2.0\OSNSystem\OSNSystem\bin\Debug\mysql.data.dll
C:\Users\Administrator\Desktop\双透传模块方案上位机程序V2.0\OSNSystem\OSNSystem\bin\Debug\TeeChart.dll
C:\Users\Administrator\Desktop\双透传模块方案上位机程序V2.0\OSNSystem\OSNSystem\bin\Debug\TeeChart.xml
C:\Users\Administrator\Desktop\双透传模块方案上位机程序V2.0\OSNSystem\OSNSystem\obj\x86\Debug\OSNSystem.csprojResolveAssemblyReference.cache
C:\Users\Administrator\Desktop\双透传模块方案上位机程序V2.0\OSNSystem\OSNSystem\obj\x86\Debug\OSNSystem.cmdCollectSet.resources
C:\Users\Administrator\Desktop\双透传模块方案上位机程序V2.0\OSNSystem\OSNSystem\obj\x86\Debug\OSNSystem.cmdSet.resources
C:\Users\Administrator\Desktop\双透传模块方案上位机程序V2.0\OSNSystem\OSNSystem\obj\x86\Debug\OSNSystem.Main.resources
C:\Users\Administrator\Desktop\双透传模块方案上位机程序V2.0\OSNSystem\OSNSystem\obj\x86\Debug\OSNSystem.Properties.Resources.resources
C:\Users\Administrator\Desktop\双透传模块方案上位机程序V2.0\OSNSystem\OSNSystem\obj\x86\Debug\OSNSystem.SensorConfig.resources
C:\Users\Administrator\Desktop\双透传模块方案上位机程序V2.0\OSNSystem\OSNSystem\obj\x86\Debug\OSNSystem.SetCamera.resources
C:\Users\Administrator\Desktop\双透传模块方案上位机程序V2.0\OSNSystem\OSNSystem\obj\x86\Debug\OSNSystem.SetCTD.resources
C:\Users\Administrator\Desktop\双透传模块方案上位机程序V2.0\OSNSystem\OSNSystem\obj\x86\Debug\OSNSystem.SetDO.resources
C:\Users\Administrator\Desktop\双透传模块方案上位机程序V2.0\OSNSystem\OSNSystem\obj\x86\Debug\OSNSystem.SetMulti.resources
C:\Users\Administrator\Desktop\双透传模块方案上位机程序V2.0\OSNSystem\OSNSystem\obj\x86\Debug\OSNSystem.SetPicScope.resources
C:\Users\Administrator\Desktop\双透传模块方案上位机程序V2.0\OSNSystem\OSNSystem\obj\x86\Debug\OSNSystem.ShowCTDFigure.resources
C:\Users\Administrator\Desktop\双透传模块方案上位机程序V2.0\OSNSystem\OSNSystem\obj\x86\Debug\OSNSystem.csproj.GenerateResource.Cache
C:\Users\Administrator\Desktop\双透传模块方案上位机程序V3.0\OSNSystem\OSNSystem\bin\Debug\OSNSystem.exe.config
C:\Users\Administrator\Desktop\双透传模块方案上位机程序V3.0\OSNSystem\OSNSystem\obj\x86\Debug\OSNSystem.exe
C:\Users\Administrator\Desktop\双透传模块方案上位机程序V3.0\OSNSystem\OSNSystem\obj\x86\Debug\OSNSystem.pdb
C:\Users\Administrator\Desktop\双透传模块方案上位机程序V3.0\OSNSystem\OSNSystem\bin\Debug\OSNSystem.exe
C:\Users\Administrator\Desktop\双透传模块方案上位机程序V3.0\OSNSystem\OSNSystem\bin\Debug\OSNSystem.pdb
C:\Users\Administrator\Desktop\双透传模块方案上位机程序V3.0\OSNSystem\OSNSystem\bin\Debug\mysql.data.dll
C:\Users\Administrator\Desktop\双透传模块方案上位机程序V3.0\OSNSystem\OSNSystem\bin\Debug\TeeChart.dll
C:\Users\Administrator\Desktop\双透传模块方案上位机程序V3.0\OSNSystem\OSNSystem\bin\Debug\TeeChart.xml
C:\Users\Administrator\Desktop\双透传模块方案上位机程序V3.0\OSNSystem\OSNSystem\obj\x86\Debug\OSNSystem.csprojResolveAssemblyReference.cache
C:\Users\Administrator\Desktop\双透传模块方案上位机程序V3.0\OSNSystem\OSNSystem\obj\x86\Debug\OSNSystem.cmdCollectSet.resources
C:\Users\Administrator\Desktop\双透传模块方案上位机程序V3.0\OSNSystem\OSNSystem\obj\x86\Debug\OSNSystem.cmdSet.resources
C:\Users\Administrator\Desktop\双透传模块方案上位机程序V3.0\OSNSystem\OSNSystem\obj\x86\Debug\OSNSystem.Main.resources
C:\Users\Administrator\Desktop\双透传模块方案上位机程序V3.0\OSNSystem\OSNSystem\obj\x86\Debug\OSNSystem.Properties.Resources.resources
C:\Users\Administrator\Desktop\双透传模块方案上位机程序V3.0\OSNSystem\OSNSystem\obj\x86\Debug\OSNSystem.SensorConfig.resources
C:\Users\Administrator\Desktop\双透传模块方案上位机程序V3.0\OSNSystem\OSNSystem\obj\x86\Debug\OSNSystem.SetCamera.resources
C:\Users\Administrator\Desktop\双透传模块方案上位机程序V3.0\OSNSystem\OSNSystem\obj\x86\Debug\OSNSystem.SetCTD.resources
C:\Users\Administrator\Desktop\双透传模块方案上位机程序V3.0\OSNSystem\OSNSystem\obj\x86\Debug\OSNSystem.SetDO.resources
C:\Users\Administrator\Desktop\双透传模块方案上位机程序V3.0\OSNSystem\OSNSystem\obj\x86\Debug\OSNSystem.SetMulti.resources
C:\Users\Administrator\Desktop\双透传模块方案上位机程序V3.0\OSNSystem\OSNSystem\obj\x86\Debug\OSNSystem.SetPicScope.resources
C:\Users\Administrator\Desktop\双透传模块方案上位机程序V3.0\OSNSystem\OSNSystem\obj\x86\Debug\OSNSystem.ShowCTDFigure.resources
C:\Users\Administrator\Desktop\双透传模块方案上位机程序V3.0\OSNSystem\OSNSystem\obj\x86\Debug\OSNSystem.csproj.GenerateResource.Cache
C:\Users\Administrator\Desktop\安装包\OSNSystem\OSNSystem\bin\Debug\OSNSystem.exe.config
C:\Users\Administrator\Desktop\安装包\OSNSystem\OSNSystem\obj\x86\Debug\OSNSystem.exe
C:\Users\Administrator\Desktop\安装包\OSNSystem\OSNSystem\obj\x86\Debug\OSNSystem.pdb
C:\Users\Administrator\Desktop\安装包\OSNSystem\OSNSystem\bin\Debug\OSNSystem.exe
C:\Users\Administrator\Desktop\安装包\OSNSystem\OSNSystem\bin\Debug\OSNSystem.pdb
C:\Users\Administrator\Desktop\安装包\OSNSystem\OSNSystem\bin\Debug\mysql.data.dll
C:\Users\Administrator\Desktop\安装包\OSNSystem\OSNSystem\bin\Debug\TeeChart.dll
C:\Users\Administrator\Desktop\安装包\OSNSystem\OSNSystem\bin\Debug\TeeChart.xml
C:\Users\Administrator\Desktop\安装包\OSNSystem\OSNSystem\obj\x86\Debug\OSNSystem.csprojResolveAssemblyReference.cache
C:\Users\Administrator\Desktop\安装包\OSNSystem\OSNSystem\obj\x86\Debug\OSNSystem.cmdCollectSet.resources
C:\Users\Administrator\Desktop\安装包\OSNSystem\OSNSystem\obj\x86\Debug\OSNSystem.cmdSet.resources
C:\Users\Administrator\Desktop\安装包\OSNSystem\OSNSystem\obj\x86\Debug\OSNSystem.Main.resources
C:\Users\Administrator\Desktop\安装包\OSNSystem\OSNSystem\obj\x86\Debug\OSNSystem.Properties.Resources.resources
C:\Users\Administrator\Desktop\安装包\OSNSystem\OSNSystem\obj\x86\Debug\OSNSystem.SensorConfig.resources
C:\Users\Administrator\Desktop\安装包\OSNSystem\OSNSystem\obj\x86\Debug\OSNSystem.SetCamera.resources
C:\Users\Administrator\Desktop\安装包\OSNSystem\OSNSystem\obj\x86\Debug\OSNSystem.SetCTD.resources
C:\Users\Administrator\Desktop\安装包\OSNSystem\OSNSystem\obj\x86\Debug\OSNSystem.SetDO.resources
C:\Users\Administrator\Desktop\安装包\OSNSystem\OSNSystem\obj\x86\Debug\OSNSystem.SetMulti.resources
C:\Users\Administrator\Desktop\安装包\OSNSystem\OSNSystem\obj\x86\Debug\OSNSystem.SetPicScope.resources
C:\Users\Administrator\Desktop\安装包\OSNSystem\OSNSystem\obj\x86\Debug\OSNSystem.ShowCTDFigure.resources
C:\Users\Administrator\Desktop\安装包\OSNSystem\OSNSystem\obj\x86\Debug\OSNSystem.csproj.GenerateResource.Cache
D:\安装源程序\安装包\OSNSystem\OSNSystem\bin\Debug\OSNSystem.exe.config
D:\安装源程序\安装包\OSNSystem\OSNSystem\obj\x86\Debug\OSNSystem.exe
D:\安装源程序\安装包\OSNSystem\OSNSystem\obj\x86\Debug\OSNSystem.pdb
D:\安装源程序\安装包\OSNSystem\OSNSystem\bin\Debug\OSNSystem.exe
D:\安装源程序\安装包\OSNSystem\OSNSystem\bin\Debug\OSNSystem.pdb
D:\安装源程序\安装包\OSNSystem\OSNSystem\bin\Debug\mysql.data.dll
D:\安装源程序\安装包\OSNSystem\OSNSystem\bin\Debug\TeeChart.dll
D:\安装源程序\安装包\OSNSystem\OSNSystem\bin\Debug\TeeChart.xml
D:\安装源程序\安装包\OSNSystem\OSNSystem\obj\x86\Debug\OSNSystem.csprojResolveAssemblyReference.cache
D:\安装源程序\安装包\OSNSystem\OSNSystem\obj\x86\Debug\OSNSystem.cmdCollectSet.resources
D:\安装源程序\安装包\OSNSystem\OSNSystem\obj\x86\Debug\OSNSystem.cmdSet.resources
D:\安装源程序\安装包\OSNSystem\OSNSystem\obj\x86\Debug\OSNSystem.Main.resources
D:\安装源程序\安装包\OSNSystem\OSNSystem\obj\x86\Debug\OSNSystem.Properties.Resources.resources
D:\安装源程序\安装包\OSNSystem\OSNSystem\obj\x86\Debug\OSNSystem.SensorConfig.resources
D:\安装源程序\安装包\OSNSystem\OSNSystem\obj\x86\Debug\OSNSystem.SetCamera.resources
D:\安装源程序\安装包\OSNSystem\OSNSystem\obj\x86\Debug\OSNSystem.SetCTD.resources
D:\安装源程序\安装包\OSNSystem\OSNSystem\obj\x86\Debug\OSNSystem.SetDO.resources
D:\安装源程序\安装包\OSNSystem\OSNSystem\obj\x86\Debug\OSNSystem.SetMulti.resources
D:\安装源程序\安装包\OSNSystem\OSNSystem\obj\x86\Debug\OSNSystem.SetPicScope.resources
D:\安装源程序\安装包\OSNSystem\OSNSystem\obj\x86\Debug\OSNSystem.ShowCTDFigure.resources
D:\安装源程序\安装包\OSNSystem\OSNSystem\obj\x86\Debug\OSNSystem.csproj.GenerateResource.Cache
C:\Users\Administrator\Desktop\双透传模块方案上位机程序V3.0\2021-03-21\OSNSystem\OSNSystem\bin\Debug\OSNSystem.exe.config
C:\Users\Administrator\Desktop\双透传模块方案上位机程序V3.0\2021-03-21\OSNSystem\OSNSystem\obj\x86\Debug\OSNSystem.exe
C:\Users\Administrator\Desktop\双透传模块方案上位机程序V3.0\2021-03-21\OSNSystem\OSNSystem\obj\x86\Debug\OSNSystem.pdb
C:\Users\Administrator\Desktop\双透传模块方案上位机程序V3.0\2021-03-21\OSNSystem\OSNSystem\bin\Debug\OSNSystem.exe
C:\Users\Administrator\Desktop\双透传模块方案上位机程序V3.0\2021-03-21\OSNSystem\OSNSystem\bin\Debug\OSNSystem.pdb
C:\Users\Administrator\Desktop\双透传模块方案上位机程序V3.0\2021-03-21\OSNSystem\OSNSystem\bin\Debug\mysql.data.dll
C:\Users\Administrator\Desktop\双透传模块方案上位机程序V3.0\2021-03-21\OSNSystem\OSNSystem\bin\Debug\TeeChart.dll
C:\Users\Administrator\Desktop\双透传模块方案上位机程序V3.0\2021-03-21\OSNSystem\OSNSystem\bin\Debug\TeeChart.xml
C:\Users\Administrator\Desktop\双透传模块方案上位机程序V3.0\2021-03-21\OSNSystem\OSNSystem\obj\x86\Debug\OSNSystem.csprojResolveAssemblyReference.cache
C:\Users\Administrator\Desktop\双透传模块方案上位机程序V3.0\2021-03-21\OSNSystem\OSNSystem\obj\x86\Debug\OSNSystem.cmdCollectSet.resources
C:\Users\Administrator\Desktop\双透传模块方案上位机程序V3.0\2021-03-21\OSNSystem\OSNSystem\obj\x86\Debug\OSNSystem.cmdSet.resources
C:\Users\Administrator\Desktop\双透传模块方案上位机程序V3.0\2021-03-21\OSNSystem\OSNSystem\obj\x86\Debug\OSNSystem.Main.resources
C:\Users\Administrator\Desktop\双透传模块方案上位机程序V3.0\2021-03-21\OSNSystem\OSNSystem\obj\x86\Debug\OSNSystem.Properties.Resources.resources
C:\Users\Administrator\Desktop\双透传模块方案上位机程序V3.0\2021-03-21\OSNSystem\OSNSystem\obj\x86\Debug\OSNSystem.SensorConfig.resources
C:\Users\Administrator\Desktop\双透传模块方案上位机程序V3.0\2021-03-21\OSNSystem\OSNSystem\obj\x86\Debug\OSNSystem.SetCamera.resources
C:\Users\Administrator\Desktop\双透传模块方案上位机程序V3.0\2021-03-21\OSNSystem\OSNSystem\obj\x86\Debug\OSNSystem.SetCTD.resources
C:\Users\Administrator\Desktop\双透传模块方案上位机程序V3.0\2021-03-21\OSNSystem\OSNSystem\obj\x86\Debug\OSNSystem.SetDO.resources
C:\Users\Administrator\Desktop\双透传模块方案上位机程序V3.0\2021-03-21\OSNSystem\OSNSystem\obj\x86\Debug\OSNSystem.SetMulti.resources
C:\Users\Administrator\Desktop\双透传模块方案上位机程序V3.0\2021-03-21\OSNSystem\OSNSystem\obj\x86\Debug\OSNSystem.SetPicScope.resources
C:\Users\Administrator\Desktop\双透传模块方案上位机程序V3.0\2021-03-21\OSNSystem\OSNSystem\obj\x86\Debug\OSNSystem.ShowCTDFigure.resources
C:\Users\Administrator\Desktop\双透传模块方案上位机程序V3.0\2021-03-21\OSNSystem\OSNSystem\obj\x86\Debug\OSNSystem.csproj.GenerateResource.Cache
C:\Users\Administrator\Desktop\双透传模块方案上位机程序V3.0\2021-03-31\OSNSystem\OSNSystem\bin\Debug\OSNSystem.exe.config
C:\Users\Administrator\Desktop\双透传模块方案上位机程序V3.0\2021-03-31\OSNSystem\OSNSystem\obj\x86\Debug\OSNSystem.exe
C:\Users\Administrator\Desktop\双透传模块方案上位机程序V3.0\2021-03-31\OSNSystem\OSNSystem\obj\x86\Debug\OSNSystem.pdb
C:\Users\Administrator\Desktop\双透传模块方案上位机程序V3.0\2021-03-31\OSNSystem\OSNSystem\bin\Debug\OSNSystem.exe
C:\Users\Administrator\Desktop\双透传模块方案上位机程序V3.0\2021-03-31\OSNSystem\OSNSystem\bin\Debug\OSNSystem.pdb
C:\Users\Administrator\Desktop\双透传模块方案上位机程序V3.0\2021-03-31\OSNSystem\OSNSystem\bin\Debug\mysql.data.dll
C:\Users\Administrator\Desktop\双透传模块方案上位机程序V3.0\2021-03-31\OSNSystem\OSNSystem\bin\Debug\TeeChart.dll
C:\Users\Administrator\Desktop\双透传模块方案上位机程序V3.0\2021-03-31\OSNSystem\OSNSystem\bin\Debug\TeeChart.xml
C:\Users\Administrator\Desktop\双透传模块方案上位机程序V3.0\2021-03-31\OSNSystem\OSNSystem\obj\x86\Debug\OSNSystem.csprojResolveAssemblyReference.cache
C:\Users\Administrator\Desktop\双透传模块方案上位机程序V3.0\2021-03-31\OSNSystem\OSNSystem\obj\x86\Debug\OSNSystem.cmdCollectSet.resources
C:\Users\Administrator\Desktop\双透传模块方案上位机程序V3.0\2021-03-31\OSNSystem\OSNSystem\obj\x86\Debug\OSNSystem.cmdSet.resources
C:\Users\Administrator\Desktop\双透传模块方案上位机程序V3.0\2021-03-31\OSNSystem\OSNSystem\obj\x86\Debug\OSNSystem.Main.resources
C:\Users\Administrator\Desktop\双透传模块方案上位机程序V3.0\2021-03-31\OSNSystem\OSNSystem\obj\x86\Debug\OSNSystem.Properties.Resources.resources
C:\Users\Administrator\Desktop\双透传模块方案上位机程序V3.0\2021-03-31\OSNSystem\OSNSystem\obj\x86\Debug\OSNSystem.SensorConfig.resources
C:\Users\Administrator\Desktop\双透传模块方案上位机程序V3.0\2021-03-31\OSNSystem\OSNSystem\obj\x86\Debug\OSNSystem.SetCamera.resources
C:\Users\Administrator\Desktop\双透传模块方案上位机程序V3.0\2021-03-31\OSNSystem\OSNSystem\obj\x86\Debug\OSNSystem.SetCTD.resources
C:\Users\Administrator\Desktop\双透传模块方案上位机程序V3.0\2021-03-31\OSNSystem\OSNSystem\obj\x86\Debug\OSNSystem.SetDO.resources
C:\Users\Administrator\Desktop\双透传模块方案上位机程序V3.0\2021-03-31\OSNSystem\OSNSystem\obj\x86\Debug\OSNSystem.SetPicScope.resources
C:\Users\Administrator\Desktop\双透传模块方案上位机程序V3.0\2021-03-31\OSNSystem\OSNSystem\obj\x86\Debug\OSNSystem.ShowCTDFigure.resources
C:\Users\Administrator\Desktop\双透传模块方案上位机程序V3.0\2021-03-31\OSNSystem\OSNSystem\obj\x86\Debug\OSNSystem.csproj.GenerateResource.Cache
C:\Users\Administrator\Desktop\双透传模块方案上位机程序V3.0\2021-03-31\OSNSystem\OSNSystem\obj\x86\Debug\OSNSystem.SetChlTur.resources
C:\Users\Administrator\Desktop\双透传模块方案上位机程序V3.0\2021-05-12\OSNSystem\OSNSystem\bin\Debug\OSNSystem.exe.config
C:\Users\Administrator\Desktop\双透传模块方案上位机程序V3.0\2021-05-12\OSNSystem\OSNSystem\obj\x86\Debug\OSNSystem.exe
C:\Users\Administrator\Desktop\双透传模块方案上位机程序V3.0\2021-05-12\OSNSystem\OSNSystem\obj\x86\Debug\OSNSystem.pdb
C:\Users\Administrator\Desktop\双透传模块方案上位机程序V3.0\2021-05-12\OSNSystem\OSNSystem\bin\Debug\OSNSystem.exe
C:\Users\Administrator\Desktop\双透传模块方案上位机程序V3.0\2021-05-12\OSNSystem\OSNSystem\bin\Debug\OSNSystem.pdb
C:\Users\Administrator\Desktop\双透传模块方案上位机程序V3.0\2021-05-12\OSNSystem\OSNSystem\bin\Debug\mysql.data.dll
C:\Users\Administrator\Desktop\双透传模块方案上位机程序V3.0\2021-05-12\OSNSystem\OSNSystem\bin\Debug\TeeChart.dll
C:\Users\Administrator\Desktop\双透传模块方案上位机程序V3.0\2021-05-12\OSNSystem\OSNSystem\bin\Debug\TeeChart.xml
C:\Users\Administrator\Desktop\双透传模块方案上位机程序V3.0\2021-05-12\OSNSystem\OSNSystem\obj\x86\Debug\OSNSystem.csprojResolveAssemblyReference.cache
C:\Users\Administrator\Desktop\双透传模块方案上位机程序V3.0\2021-05-12\OSNSystem\OSNSystem\obj\x86\Debug\OSNSystem.cmdCollectSet.resources
C:\Users\Administrator\Desktop\双透传模块方案上位机程序V3.0\2021-05-12\OSNSystem\OSNSystem\obj\x86\Debug\OSNSystem.cmdSet.resources
C:\Users\Administrator\Desktop\双透传模块方案上位机程序V3.0\2021-05-12\OSNSystem\OSNSystem\obj\x86\Debug\OSNSystem.Main.resources
C:\Users\Administrator\Desktop\双透传模块方案上位机程序V3.0\2021-05-12\OSNSystem\OSNSystem\obj\x86\Debug\OSNSystem.Properties.Resources.resources
C:\Users\Administrator\Desktop\双透传模块方案上位机程序V3.0\2021-05-12\OSNSystem\OSNSystem\obj\x86\Debug\OSNSystem.SensorConfig.resources
C:\Users\Administrator\Desktop\双透传模块方案上位机程序V3.0\2021-05-12\OSNSystem\OSNSystem\obj\x86\Debug\OSNSystem.SetCamera.resources
C:\Users\Administrator\Desktop\双透传模块方案上位机程序V3.0\2021-05-12\OSNSystem\OSNSystem\obj\x86\Debug\OSNSystem.SetCTD.resources
C:\Users\Administrator\Desktop\双透传模块方案上位机程序V3.0\2021-05-12\OSNSystem\OSNSystem\obj\x86\Debug\OSNSystem.SetDO.resources
C:\Users\Administrator\Desktop\双透传模块方案上位机程序V3.0\2021-05-12\OSNSystem\OSNSystem\obj\x86\Debug\OSNSystem.SetChlTur.resources
C:\Users\Administrator\Desktop\双透传模块方案上位机程序V3.0\2021-05-12\OSNSystem\OSNSystem\obj\x86\Debug\OSNSystem.SetPicScope.resources
C:\Users\Administrator\Desktop\双透传模块方案上位机程序V3.0\2021-05-12\OSNSystem\OSNSystem\obj\x86\Debug\OSNSystem.ShowCTDFigure.resources
C:\Users\Administrator\Desktop\双透传模块方案上位机程序V3.0\2021-05-12\OSNSystem\OSNSystem\obj\x86\Debug\OSNSystem.csproj.GenerateResource.Cache
C:\Users\Administrator\Desktop\双透传模块方案上位机程序V3.0\2021-05-21\OSNSystem\OSNSystem\bin\Debug\OSNSystem.exe.config
C:\Users\Administrator\Desktop\双透传模块方案上位机程序V3.0\2021-05-21\OSNSystem\OSNSystem\obj\x86\Debug\OSNSystem.exe
C:\Users\Administrator\Desktop\双透传模块方案上位机程序V3.0\2021-05-21\OSNSystem\OSNSystem\obj\x86\Debug\OSNSystem.pdb
C:\Users\Administrator\Desktop\双透传模块方案上位机程序V3.0\2021-05-21\OSNSystem\OSNSystem\bin\Debug\OSNSystem.exe
C:\Users\Administrator\Desktop\双透传模块方案上位机程序V3.0\2021-05-21\OSNSystem\OSNSystem\bin\Debug\OSNSystem.pdb
C:\Users\Administrator\Desktop\双透传模块方案上位机程序V3.0\2021-05-21\OSNSystem\OSNSystem\bin\Debug\mysql.data.dll
C:\Users\Administrator\Desktop\双透传模块方案上位机程序V3.0\2021-05-21\OSNSystem\OSNSystem\bin\Debug\TeeChart.dll
C:\Users\Administrator\Desktop\双透传模块方案上位机程序V3.0\2021-05-21\OSNSystem\OSNSystem\bin\Debug\TeeChart.xml
C:\Users\Administrator\Desktop\双透传模块方案上位机程序V3.0\2021-05-21\OSNSystem\OSNSystem\obj\x86\Debug\OSNSystem.csprojResolveAssemblyReference.cache
C:\Users\Administrator\Desktop\双透传模块方案上位机程序V3.0\2021-05-21\OSNSystem\OSNSystem\obj\x86\Debug\OSNSystem.cmdCollectSet.resources
C:\Users\Administrator\Desktop\双透传模块方案上位机程序V3.0\2021-05-21\OSNSystem\OSNSystem\obj\x86\Debug\OSNSystem.cmdSet.resources
C:\Users\Administrator\Desktop\双透传模块方案上位机程序V3.0\2021-05-21\OSNSystem\OSNSystem\obj\x86\Debug\OSNSystem.Main.resources
C:\Users\Administrator\Desktop\双透传模块方案上位机程序V3.0\2021-05-21\OSNSystem\OSNSystem\obj\x86\Debug\OSNSystem.Properties.Resources.resources
C:\Users\Administrator\Desktop\双透传模块方案上位机程序V3.0\2021-05-21\OSNSystem\OSNSystem\obj\x86\Debug\OSNSystem.SensorConfig.resources
C:\Users\Administrator\Desktop\双透传模块方案上位机程序V3.0\2021-05-21\OSNSystem\OSNSystem\obj\x86\Debug\OSNSystem.SetCamera.resources
C:\Users\Administrator\Desktop\双透传模块方案上位机程序V3.0\2021-05-21\OSNSystem\OSNSystem\obj\x86\Debug\OSNSystem.SetCTD.resources
C:\Users\Administrator\Desktop\双透传模块方案上位机程序V3.0\2021-05-21\OSNSystem\OSNSystem\obj\x86\Debug\OSNSystem.SetDO.resources
C:\Users\Administrator\Desktop\双透传模块方案上位机程序V3.0\2021-05-21\OSNSystem\OSNSystem\obj\x86\Debug\OSNSystem.SetChlTur.resources
C:\Users\Administrator\Desktop\双透传模块方案上位机程序V3.0\2021-05-21\OSNSystem\OSNSystem\obj\x86\Debug\OSNSystem.SetPicScope.resources
C:\Users\Administrator\Desktop\双透传模块方案上位机程序V3.0\2021-05-21\OSNSystem\OSNSystem\obj\x86\Debug\OSNSystem.ShowCTDFigure.resources
C:\Users\Administrator\Desktop\双透传模块方案上位机程序V3.0\2021-05-21\OSNSystem\OSNSystem\obj\x86\Debug\OSNSystem.csproj.GenerateResource.Cache
D:\安装源程序\源程序\2021-06-02上位机\OSNSystem\OSNSystem\OSNSystem\bin\Debug\OSNSystem.exe.config
D:\安装源程序\源程序\2021-06-02上位机\OSNSystem\OSNSystem\OSNSystem\obj\x86\Debug\OSNSystem.exe
D:\安装源程序\源程序\2021-06-02上位机\OSNSystem\OSNSystem\OSNSystem\obj\x86\Debug\OSNSystem.pdb
D:\安装源程序\源程序\2021-06-02上位机\OSNSystem\OSNSystem\OSNSystem\bin\Debug\OSNSystem.exe
D:\安装源程序\源程序\2021-06-02上位机\OSNSystem\OSNSystem\OSNSystem\bin\Debug\OSNSystem.pdb
D:\安装源程序\源程序\2021-06-02上位机\OSNSystem\OSNSystem\OSNSystem\bin\Debug\mysql.data.dll
D:\安装源程序\源程序\2021-06-02上位机\OSNSystem\OSNSystem\OSNSystem\bin\Debug\TeeChart.dll
D:\安装源程序\源程序\2021-06-02上位机\OSNSystem\OSNSystem\OSNSystem\bin\Debug\TeeChart.xml
D:\安装源程序\源程序\2021-06-02上位机\OSNSystem\OSNSystem\OSNSystem\obj\x86\Debug\OSNSystem.csprojResolveAssemblyReference.cache
D:\安装源程序\源程序\2021-06-02上位机\OSNSystem\OSNSystem\OSNSystem\obj\x86\Debug\OSNSystem.cmdCollectSet.resources
D:\安装源程序\源程序\2021-06-02上位机\OSNSystem\OSNSystem\OSNSystem\obj\x86\Debug\OSNSystem.cmdSet.resources
D:\安装源程序\源程序\2021-06-02上位机\OSNSystem\OSNSystem\OSNSystem\obj\x86\Debug\OSNSystem.Main.resources
D:\安装源程序\源程序\2021-06-02上位机\OSNSystem\OSNSystem\OSNSystem\obj\x86\Debug\OSNSystem.Properties.Resources.resources
D:\安装源程序\源程序\2021-06-02上位机\OSNSystem\OSNSystem\OSNSystem\obj\x86\Debug\OSNSystem.SensorConfig.resources
D:\安装源程序\源程序\2021-06-02上位机\OSNSystem\OSNSystem\OSNSystem\obj\x86\Debug\OSNSystem.SetCamera.resources
D:\安装源程序\源程序\2021-06-02上位机\OSNSystem\OSNSystem\OSNSystem\obj\x86\Debug\OSNSystem.SetCTD.resources
D:\安装源程序\源程序\2021-06-02上位机\OSNSystem\OSNSystem\OSNSystem\obj\x86\Debug\OSNSystem.SetDO.resources
D:\安装源程序\源程序\2021-06-02上位机\OSNSystem\OSNSystem\OSNSystem\obj\x86\Debug\OSNSystem.SetChlTur.resources
D:\安装源程序\源程序\2021-06-02上位机\OSNSystem\OSNSystem\OSNSystem\obj\x86\Debug\OSNSystem.SetPicScope.resources
D:\安装源程序\源程序\2021-06-02上位机\OSNSystem\OSNSystem\OSNSystem\obj\x86\Debug\OSNSystem.ShowCTDFigure.resources
D:\安装源程序\源程序\2021-06-02上位机\OSNSystem\OSNSystem\OSNSystem\obj\x86\Debug\OSNSystem.csproj.GenerateResource.Cache
E:\1.code\2021-06-24上位机\OSNSystem\OSNSystem\OSNSystem\bin\Debug\OSNSystem.exe.config
E:\1.code\2021-06-24上位机\OSNSystem\OSNSystem\OSNSystem\obj\x86\Debug\OSNSystem.exe
E:\1.code\2021-06-24上位机\OSNSystem\OSNSystem\OSNSystem\obj\x86\Debug\OSNSystem.pdb
C:\Users\Administrator\Desktop\2021-06-24上位机\OSNSystem\OSNSystem\OSNSystem\bin\Debug\OSNSystem.exe.config
C:\Users\Administrator\Desktop\2021-06-24上位机\OSNSystem\OSNSystem\OSNSystem\obj\x86\Debug\OSNSystem.exe
C:\Users\Administrator\Desktop\2021-06-24上位机\OSNSystem\OSNSystem\OSNSystem\obj\x86\Debug\OSNSystem.pdb
D:\安装源程序\源程序\2021-06-24上位机\OSNSystem\OSNSystem\OSNSystem\bin\Debug\OSNSystem.exe.config
D:\安装源程序\源程序\2021-06-24上位机\OSNSystem\OSNSystem\OSNSystem\obj\x86\Debug\OSNSystem.exe
D:\安装源程序\源程序\2021-06-24上位机\OSNSystem\OSNSystem\OSNSystem\obj\x86\Debug\OSNSystem.pdb
C:\Users\Administrator\Desktop\双透传模块方案上位机程序V3.0\2021-08-16\2021-08-16上位机\OSNSystem\OSNSystem\OSNSystem\bin\Debug\OSNSystem.exe.config
C:\Users\Administrator\Desktop\双透传模块方案上位机程序V3.0\2021-08-16\2021-08-16上位机\OSNSystem\OSNSystem\OSNSystem\obj\x86\Debug\OSNSystem.exe
C:\Users\Administrator\Desktop\双透传模块方案上位机程序V3.0\2021-08-16\2021-08-16上位机\OSNSystem\OSNSystem\OSNSystem\obj\x86\Debug\OSNSystem.pdb
C:\Users\Administrator\Desktop\双透传模块方案上位机程序V3.0\2021-08-16\2021-08-16上位机\OSNSystem\OSNSystem\OSNSystem\bin\Debug\OSNSystem.exe
C:\Users\Administrator\Desktop\双透传模块方案上位机程序V3.0\2021-08-16\2021-08-16上位机\OSNSystem\OSNSystem\OSNSystem\bin\Debug\OSNSystem.pdb
C:\Users\Administrator\Desktop\双透传模块方案上位机程序V3.0\2021-08-16\2021-08-16上位机\OSNSystem\OSNSystem\OSNSystem\bin\Debug\mysql.data.dll
C:\Users\Administrator\Desktop\双透传模块方案上位机程序V3.0\2021-08-16\2021-08-16上位机\OSNSystem\OSNSystem\OSNSystem\bin\Debug\TeeChart.dll
C:\Users\Administrator\Desktop\双透传模块方案上位机程序V3.0\2021-08-16\2021-08-16上位机\OSNSystem\OSNSystem\OSNSystem\bin\Debug\TeeChart.xml
C:\Users\Administrator\Desktop\双透传模块方案上位机程序V3.0\2021-08-16\2021-08-16上位机\OSNSystem\OSNSystem\OSNSystem\obj\x86\Debug\OSNSystem.csprojResolveAssemblyReference.cache
C:\Users\Administrator\Desktop\双透传模块方案上位机程序V3.0\2021-08-16\2021-08-16上位机\OSNSystem\OSNSystem\OSNSystem\obj\x86\Debug\OSNSystem.cmdCollectSet.resources
C:\Users\Administrator\Desktop\双透传模块方案上位机程序V3.0\2021-08-16\2021-08-16上位机\OSNSystem\OSNSystem\OSNSystem\obj\x86\Debug\OSNSystem.cmdSet.resources
C:\Users\Administrator\Desktop\双透传模块方案上位机程序V3.0\2021-08-16\2021-08-16上位机\OSNSystem\OSNSystem\OSNSystem\obj\x86\Debug\OSNSystem.Main.resources
C:\Users\Administrator\Desktop\双透传模块方案上位机程序V3.0\2021-08-16\2021-08-16上位机\OSNSystem\OSNSystem\OSNSystem\obj\x86\Debug\OSNSystem.Properties.Resources.resources
C:\Users\Administrator\Desktop\双透传模块方案上位机程序V3.0\2021-08-16\2021-08-16上位机\OSNSystem\OSNSystem\OSNSystem\obj\x86\Debug\OSNSystem.SensorConfig.resources
C:\Users\Administrator\Desktop\双透传模块方案上位机程序V3.0\2021-08-16\2021-08-16上位机\OSNSystem\OSNSystem\OSNSystem\obj\x86\Debug\OSNSystem.SetCamera.resources
C:\Users\Administrator\Desktop\双透传模块方案上位机程序V3.0\2021-08-16\2021-08-16上位机\OSNSystem\OSNSystem\OSNSystem\obj\x86\Debug\OSNSystem.SetCTD.resources
C:\Users\Administrator\Desktop\双透传模块方案上位机程序V3.0\2021-08-16\2021-08-16上位机\OSNSystem\OSNSystem\OSNSystem\obj\x86\Debug\OSNSystem.SetDO.resources
C:\Users\Administrator\Desktop\双透传模块方案上位机程序V3.0\2021-08-16\2021-08-16上位机\OSNSystem\OSNSystem\OSNSystem\obj\x86\Debug\OSNSystem.SetChlTur.resources
C:\Users\Administrator\Desktop\双透传模块方案上位机程序V3.0\2021-08-16\2021-08-16上位机\OSNSystem\OSNSystem\OSNSystem\obj\x86\Debug\OSNSystem.SetPicScope.resources
C:\Users\Administrator\Desktop\双透传模块方案上位机程序V3.0\2021-08-16\2021-08-16上位机\OSNSystem\OSNSystem\OSNSystem\obj\x86\Debug\OSNSystem.ShowCTDFigure.resources
C:\Users\Administrator\Desktop\双透传模块方案上位机程序V3.0\2021-08-16\2021-08-16上位机\OSNSystem\OSNSystem\OSNSystem\obj\x86\Debug\OSNSystem.csproj.GenerateResource.Cache
F:\1.Project\4.国家发改委智慧海洋接驳盒国产化研究\7.国家发改委智慧海洋接驳盒国产化研究项目\2.源代码\4.与五牛软件对接\2.添加与云服务器对接指令流代码\OSNSystem\OSNSystem\OSNSystem\bin\Debug\OSNSystem.exe.config
F:\1.Project\4.国家发改委智慧海洋接驳盒国产化研究\7.国家发改委智慧海洋接驳盒国产化研究项目\2.源代码\4.与五牛软件对接\2.添加与云服务器对接指令流代码\OSNSystem\OSNSystem\OSNSystem\obj\x86\Debug\OSNSystem.exe
F:\1.Project\4.国家发改委智慧海洋接驳盒国产化研究\7.国家发改委智慧海洋接驳盒国产化研究项目\2.源代码\4.与五牛软件对接\2.添加与云服务器对接指令流代码\OSNSystem\OSNSystem\OSNSystem\obj\x86\Debug\OSNSystem.pdb
F:\1.Project\4.国家发改委智慧海洋接驳盒国产化研究\7.国家发改委智慧海洋接驳盒国产化研究项目\2.源代码\4.与五牛软件对接\2.添加与云服务器对接指令流代码\OSNSystem\OSNSystem\OSNSystem\bin\Debug\OSNSystem.exe
F:\1.Project\4.国家发改委智慧海洋接驳盒国产化研究\7.国家发改委智慧海洋接驳盒国产化研究项目\2.源代码\4.与五牛软件对接\2.添加与云服务器对接指令流代码\OSNSystem\OSNSystem\OSNSystem\bin\Debug\OSNSystem.pdb
F:\1.Project\4.国家发改委智慧海洋接驳盒国产化研究\7.国家发改委智慧海洋接驳盒国产化研究项目\2.源代码\4.与五牛软件对接\2.添加与云服务器对接指令流代码\OSNSystem\OSNSystem\OSNSystem\bin\Debug\TeeChart.dll
F:\1.Project\4.国家发改委智慧海洋接驳盒国产化研究\7.国家发改委智慧海洋接驳盒国产化研究项目\2.源代码\4.与五牛软件对接\2.添加与云服务器对接指令流代码\OSNSystem\OSNSystem\OSNSystem\bin\Debug\TeeChart.xml
F:\1.Project\4.国家发改委智慧海洋接驳盒国产化研究\7.国家发改委智慧海洋接驳盒国产化研究项目\2.源代码\4.与五牛软件对接\2.添加与云服务器对接指令流代码\OSNSystem\OSNSystem\OSNSystem\obj\x86\Debug\OSNSystem.cmdCollectSet.resources
F:\1.Project\4.国家发改委智慧海洋接驳盒国产化研究\7.国家发改委智慧海洋接驳盒国产化研究项目\2.源代码\4.与五牛软件对接\2.添加与云服务器对接指令流代码\OSNSystem\OSNSystem\OSNSystem\obj\x86\Debug\OSNSystem.cmdSet.resources
F:\1.Project\4.国家发改委智慧海洋接驳盒国产化研究\7.国家发改委智慧海洋接驳盒国产化研究项目\2.源代码\4.与五牛软件对接\2.添加与云服务器对接指令流代码\OSNSystem\OSNSystem\OSNSystem\obj\x86\Debug\OSNSystem.Main.resources
F:\1.Project\4.国家发改委智慧海洋接驳盒国产化研究\7.国家发改委智慧海洋接驳盒国产化研究项目\2.源代码\4.与五牛软件对接\2.添加与云服务器对接指令流代码\OSNSystem\OSNSystem\OSNSystem\obj\x86\Debug\OSNSystem.Properties.Resources.resources
F:\1.Project\4.国家发改委智慧海洋接驳盒国产化研究\7.国家发改委智慧海洋接驳盒国产化研究项目\2.源代码\4.与五牛软件对接\2.添加与云服务器对接指令流代码\OSNSystem\OSNSystem\OSNSystem\obj\x86\Debug\OSNSystem.SensorConfig.resources
F:\1.Project\4.国家发改委智慧海洋接驳盒国产化研究\7.国家发改委智慧海洋接驳盒国产化研究项目\2.源代码\4.与五牛软件对接\2.添加与云服务器对接指令流代码\OSNSystem\OSNSystem\OSNSystem\obj\x86\Debug\OSNSystem.SetCamera.resources
F:\1.Project\4.国家发改委智慧海洋接驳盒国产化研究\7.国家发改委智慧海洋接驳盒国产化研究项目\2.源代码\4.与五牛软件对接\2.添加与云服务器对接指令流代码\OSNSystem\OSNSystem\OSNSystem\obj\x86\Debug\OSNSystem.SetCTD.resources
F:\1.Project\4.国家发改委智慧海洋接驳盒国产化研究\7.国家发改委智慧海洋接驳盒国产化研究项目\2.源代码\4.与五牛软件对接\2.添加与云服务器对接指令流代码\OSNSystem\OSNSystem\OSNSystem\obj\x86\Debug\OSNSystem.SetDO.resources
F:\1.Project\4.国家发改委智慧海洋接驳盒国产化研究\7.国家发改委智慧海洋接驳盒国产化研究项目\2.源代码\4.与五牛软件对接\2.添加与云服务器对接指令流代码\OSNSystem\OSNSystem\OSNSystem\obj\x86\Debug\OSNSystem.SetChlTur.resources
F:\1.Project\4.国家发改委智慧海洋接驳盒国产化研究\7.国家发改委智慧海洋接驳盒国产化研究项目\2.源代码\4.与五牛软件对接\2.添加与云服务器对接指令流代码\OSNSystem\OSNSystem\OSNSystem\obj\x86\Debug\OSNSystem.SetPicScope.resources
F:\1.Project\4.国家发改委智慧海洋接驳盒国产化研究\7.国家发改委智慧海洋接驳盒国产化研究项目\2.源代码\4.与五牛软件对接\2.添加与云服务器对接指令流代码\OSNSystem\OSNSystem\OSNSystem\obj\x86\Debug\OSNSystem.ShowCTDFigure.resources
F:\1.Project\4.国家发改委智慧海洋接驳盒国产化研究\7.国家发改委智慧海洋接驳盒国产化研究项目\2.源代码\4.与五牛软件对接\2.添加与云服务器对接指令流代码\OSNSystem\OSNSystem\OSNSystem\obj\x86\Debug\OSNSystem.csproj.GenerateResource.Cache
F:\1.Project\4.国家发改委智慧海洋接驳盒国产化研究\7.国家发改委智慧海洋接驳盒国产化研究项目\2.源代码\4.与五牛软件对接\2.添加与云服务器对接指令流代码\OSNSystem\OSNSystem\OSNSystem\obj\x86\Debug\OSNSystem.csproj.AssemblyReference.cache
F:\1.Project\4.国家发改委智慧海洋接驳盒国产化研究\7.国家发改委智慧海洋接驳盒国产化研究项目\2.源代码\4.与五牛软件对接\2.添加与云服务器对接指令流代码\OSNSystem\OSNSystem\OSNSystem\obj\x86\Debug\OSNSystem.csproj.CoreCompileInputs.cache
F:\1.Project\4.国家发改委智慧海洋接驳盒国产化研究\7.国家发改委智慧海洋接驳盒国产化研究项目\2.源代码\4.与五牛软件对接\2.添加与云服务器对接指令流代码\OSNSystem\OSNSystem\OSNSystem\obj\x86\Debug\OSNSystem.csproj.CopyComplete
F:\1.Project\4.国家发改委智慧海洋接驳盒国产化研究\7.国家发改委智慧海洋接驳盒国产化研究项目\2.源代码\4.与五牛软件对接\2.添加与云服务器对接指令流代码\OSNSystem\OSNSystem\OSNSystem\bin\Debug\Google.Protobuf.dll
F:\1.Project\4.国家发改委智慧海洋接驳盒国产化研究\7.国家发改委智慧海洋接驳盒国产化研究项目\2.源代码\4.与五牛软件对接\2.添加与云服务器对接指令流代码\OSNSystem\OSNSystem\OSNSystem\bin\Debug\ZstdNet.dll
F:\1.Project\4.国家发改委智慧海洋接驳盒国产化研究\7.国家发改委智慧海洋接驳盒国产化研究项目\2.源代码\4.与五牛软件对接\2.添加与云服务器对接指令流代码\OSNSystem\OSNSystem\OSNSystem\bin\Debug\K4os.Compression.LZ4.Streams.dll
F:\1.Project\4.国家发改委智慧海洋接驳盒国产化研究\7.国家发改委智慧海洋接驳盒国产化研究项目\2.源代码\4.与五牛软件对接\2.添加与云服务器对接指令流代码\OSNSystem\OSNSystem\OSNSystem\bin\Debug\BouncyCastle.Crypto.dll
F:\1.Project\4.国家发改委智慧海洋接驳盒国产化研究\7.国家发改委智慧海洋接驳盒国产化研究项目\2.源代码\4.与五牛软件对接\2.添加与云服务器对接指令流代码\OSNSystem\OSNSystem\OSNSystem\bin\Debug\Ubiety.Dns.Core.dll
F:\1.Project\4.国家发改委智慧海洋接驳盒国产化研究\7.国家发改委智慧海洋接驳盒国产化研究项目\2.源代码\4.与五牛软件对接\2.添加与云服务器对接指令流代码\OSNSystem\OSNSystem\OSNSystem\bin\Debug\System.Memory.dll
F:\1.Project\4.国家发改委智慧海洋接驳盒国产化研究\7.国家发改委智慧海洋接驳盒国产化研究项目\2.源代码\4.与五牛软件对接\2.添加与云服务器对接指令流代码\OSNSystem\OSNSystem\OSNSystem\bin\Debug\System.Buffers.dll
F:\1.Project\4.国家发改委智慧海洋接驳盒国产化研究\7.国家发改委智慧海洋接驳盒国产化研究项目\2.源代码\4.与五牛软件对接\2.添加与云服务器对接指令流代码\OSNSystem\OSNSystem\OSNSystem\bin\Debug\K4os.Compression.LZ4.dll
F:\1.Project\4.国家发改委智慧海洋接驳盒国产化研究\7.国家发改委智慧海洋接驳盒国产化研究项目\2.源代码\4.与五牛软件对接\2.添加与云服务器对接指令流代码\OSNSystem\OSNSystem\OSNSystem\bin\Debug\K4os.Hash.xxHash.dll
C:\Users\Administrator\Desktop\实验室程序测试版本\1.连接云数据库以及云服务器版本\OSNSystem\OSNSystem\OSNSystem\bin\Debug\OSNSystem.exe.config
C:\Users\Administrator\Desktop\实验室程序测试版本\1.连接云数据库以及云服务器版本\OSNSystem\OSNSystem\OSNSystem\obj\x86\Debug\OSNSystem.exe
C:\Users\Administrator\Desktop\实验室程序测试版本\1.连接云数据库以及云服务器版本\OSNSystem\OSNSystem\OSNSystem\obj\x86\Debug\OSNSystem.pdb
C:\Users\Administrator\Desktop\实验室程序测试版本\1.连接云数据库以及云服务器版本\OSNSystem\OSNSystem\OSNSystem\bin\Debug\OSNSystem.exe
C:\Users\Administrator\Desktop\实验室程序测试版本\1.连接云数据库以及云服务器版本\OSNSystem\OSNSystem\OSNSystem\bin\Debug\OSNSystem.pdb
C:\Users\Administrator\Desktop\实验室程序测试版本\1.连接云数据库以及云服务器版本\OSNSystem\OSNSystem\OSNSystem\bin\Debug\TeeChart.dll
C:\Users\Administrator\Desktop\实验室程序测试版本\1.连接云数据库以及云服务器版本\OSNSystem\OSNSystem\OSNSystem\bin\Debug\Google.Protobuf.dll
C:\Users\Administrator\Desktop\实验室程序测试版本\1.连接云数据库以及云服务器版本\OSNSystem\OSNSystem\OSNSystem\bin\Debug\ZstdNet.dll
C:\Users\Administrator\Desktop\实验室程序测试版本\1.连接云数据库以及云服务器版本\OSNSystem\OSNSystem\OSNSystem\bin\Debug\K4os.Compression.LZ4.Streams.dll
C:\Users\Administrator\Desktop\实验室程序测试版本\1.连接云数据库以及云服务器版本\OSNSystem\OSNSystem\OSNSystem\bin\Debug\BouncyCastle.Crypto.dll
C:\Users\Administrator\Desktop\实验室程序测试版本\1.连接云数据库以及云服务器版本\OSNSystem\OSNSystem\OSNSystem\bin\Debug\Ubiety.Dns.Core.dll
C:\Users\Administrator\Desktop\实验室程序测试版本\1.连接云数据库以及云服务器版本\OSNSystem\OSNSystem\OSNSystem\bin\Debug\System.Memory.dll
C:\Users\Administrator\Desktop\实验室程序测试版本\1.连接云数据库以及云服务器版本\OSNSystem\OSNSystem\OSNSystem\bin\Debug\System.Buffers.dll
C:\Users\Administrator\Desktop\实验室程序测试版本\1.连接云数据库以及云服务器版本\OSNSystem\OSNSystem\OSNSystem\bin\Debug\K4os.Compression.LZ4.dll
C:\Users\Administrator\Desktop\实验室程序测试版本\1.连接云数据库以及云服务器版本\OSNSystem\OSNSystem\OSNSystem\bin\Debug\K4os.Hash.xxHash.dll
C:\Users\Administrator\Desktop\实验室程序测试版本\1.连接云数据库以及云服务器版本\OSNSystem\OSNSystem\OSNSystem\bin\Debug\TeeChart.xml
C:\Users\Administrator\Desktop\实验室程序测试版本\1.连接云数据库以及云服务器版本\OSNSystem\OSNSystem\OSNSystem\obj\x86\Debug\OSNSystem.csproj.AssemblyReference.cache
C:\Users\Administrator\Desktop\实验室程序测试版本\1.连接云数据库以及云服务器版本\OSNSystem\OSNSystem\OSNSystem\obj\x86\Debug\OSNSystem.cmdCollectSet.resources
C:\Users\Administrator\Desktop\实验室程序测试版本\1.连接云数据库以及云服务器版本\OSNSystem\OSNSystem\OSNSystem\obj\x86\Debug\OSNSystem.cmdSet.resources
C:\Users\Administrator\Desktop\实验室程序测试版本\1.连接云数据库以及云服务器版本\OSNSystem\OSNSystem\OSNSystem\obj\x86\Debug\OSNSystem.Main.resources
C:\Users\Administrator\Desktop\实验室程序测试版本\1.连接云数据库以及云服务器版本\OSNSystem\OSNSystem\OSNSystem\obj\x86\Debug\OSNSystem.Properties.Resources.resources
C:\Users\Administrator\Desktop\实验室程序测试版本\1.连接云数据库以及云服务器版本\OSNSystem\OSNSystem\OSNSystem\obj\x86\Debug\OSNSystem.SensorConfig.resources
C:\Users\Administrator\Desktop\实验室程序测试版本\1.连接云数据库以及云服务器版本\OSNSystem\OSNSystem\OSNSystem\obj\x86\Debug\OSNSystem.SetCamera.resources
C:\Users\Administrator\Desktop\实验室程序测试版本\1.连接云数据库以及云服务器版本\OSNSystem\OSNSystem\OSNSystem\obj\x86\Debug\OSNSystem.SetCTD.resources
C:\Users\Administrator\Desktop\实验室程序测试版本\1.连接云数据库以及云服务器版本\OSNSystem\OSNSystem\OSNSystem\obj\x86\Debug\OSNSystem.SetDO.resources
C:\Users\Administrator\Desktop\实验室程序测试版本\1.连接云数据库以及云服务器版本\OSNSystem\OSNSystem\OSNSystem\obj\x86\Debug\OSNSystem.SetChlTur.resources
C:\Users\Administrator\Desktop\实验室程序测试版本\1.连接云数据库以及云服务器版本\OSNSystem\OSNSystem\OSNSystem\obj\x86\Debug\OSNSystem.SetPicScope.resources
C:\Users\Administrator\Desktop\实验室程序测试版本\1.连接云数据库以及云服务器版本\OSNSystem\OSNSystem\OSNSystem\obj\x86\Debug\OSNSystem.ShowCTDFigure.resources
C:\Users\Administrator\Desktop\实验室程序测试版本\1.连接云数据库以及云服务器版本\OSNSystem\OSNSystem\OSNSystem\obj\x86\Debug\OSNSystem.csproj.GenerateResource.cache
C:\Users\Administrator\Desktop\实验室程序测试版本\1.连接云数据库以及云服务器版本\OSNSystem\OSNSystem\OSNSystem\obj\x86\Debug\OSNSystem.csproj.CoreCompileInputs.cache
C:\Users\Administrator\Desktop\实验室程序测试版本\1.连接云数据库以及云服务器版本\OSNSystem\OSNSystem\OSNSystem\obj\x86\Debug\OSNSystem.csproj.CopyComplete
C:\Users\Administrator\Desktop\1.连接云数据库以及云服务器版本\OSNSystem\OSNSystem\OSNSystem\bin\Debug\OSNSystem.exe.config
C:\Users\Administrator\Desktop\1.连接云数据库以及云服务器版本\OSNSystem\OSNSystem\OSNSystem\bin\Debug\OSNSystem.exe
C:\Users\Administrator\Desktop\1.连接云数据库以及云服务器版本\OSNSystem\OSNSystem\OSNSystem\bin\Debug\OSNSystem.pdb
C:\Users\Administrator\Desktop\1.连接云数据库以及云服务器版本\OSNSystem\OSNSystem\OSNSystem\bin\Debug\TeeChart.dll
C:\Users\Administrator\Desktop\1.连接云数据库以及云服务器版本\OSNSystem\OSNSystem\OSNSystem\bin\Debug\Google.Protobuf.dll
C:\Users\Administrator\Desktop\1.连接云数据库以及云服务器版本\OSNSystem\OSNSystem\OSNSystem\bin\Debug\ZstdNet.dll
C:\Users\Administrator\Desktop\1.连接云数据库以及云服务器版本\OSNSystem\OSNSystem\OSNSystem\bin\Debug\K4os.Compression.LZ4.Streams.dll
C:\Users\Administrator\Desktop\1.连接云数据库以及云服务器版本\OSNSystem\OSNSystem\OSNSystem\bin\Debug\BouncyCastle.Crypto.dll
C:\Users\Administrator\Desktop\1.连接云数据库以及云服务器版本\OSNSystem\OSNSystem\OSNSystem\bin\Debug\Ubiety.Dns.Core.dll
C:\Users\Administrator\Desktop\1.连接云数据库以及云服务器版本\OSNSystem\OSNSystem\OSNSystem\bin\Debug\System.Memory.dll
C:\Users\Administrator\Desktop\1.连接云数据库以及云服务器版本\OSNSystem\OSNSystem\OSNSystem\bin\Debug\System.Buffers.dll
C:\Users\Administrator\Desktop\1.连接云数据库以及云服务器版本\OSNSystem\OSNSystem\OSNSystem\bin\Debug\K4os.Compression.LZ4.dll
C:\Users\Administrator\Desktop\1.连接云数据库以及云服务器版本\OSNSystem\OSNSystem\OSNSystem\bin\Debug\K4os.Hash.xxHash.dll
C:\Users\Administrator\Desktop\1.连接云数据库以及云服务器版本\OSNSystem\OSNSystem\OSNSystem\bin\Debug\TeeChart.xml
C:\Users\Administrator\Desktop\1.连接云数据库以及云服务器版本\OSNSystem\OSNSystem\OSNSystem\obj\x86\Debug\OSNSystem.csproj.AssemblyReference.cache
C:\Users\Administrator\Desktop\1.连接云数据库以及云服务器版本\OSNSystem\OSNSystem\OSNSystem\obj\x86\Debug\OSNSystem.cmdCollectSet.resources
C:\Users\Administrator\Desktop\1.连接云数据库以及云服务器版本\OSNSystem\OSNSystem\OSNSystem\obj\x86\Debug\OSNSystem.cmdSet.resources
C:\Users\Administrator\Desktop\1.连接云数据库以及云服务器版本\OSNSystem\OSNSystem\OSNSystem\obj\x86\Debug\OSNSystem.Main.resources
C:\Users\Administrator\Desktop\1.连接云数据库以及云服务器版本\OSNSystem\OSNSystem\OSNSystem\obj\x86\Debug\OSNSystem.Properties.Resources.resources
C:\Users\Administrator\Desktop\1.连接云数据库以及云服务器版本\OSNSystem\OSNSystem\OSNSystem\obj\x86\Debug\OSNSystem.SensorConfig.resources
C:\Users\Administrator\Desktop\1.连接云数据库以及云服务器版本\OSNSystem\OSNSystem\OSNSystem\obj\x86\Debug\OSNSystem.SetCamera.resources
C:\Users\Administrator\Desktop\1.连接云数据库以及云服务器版本\OSNSystem\OSNSystem\OSNSystem\obj\x86\Debug\OSNSystem.SetCTD.resources
C:\Users\Administrator\Desktop\1.连接云数据库以及云服务器版本\OSNSystem\OSNSystem\OSNSystem\obj\x86\Debug\OSNSystem.SetDO.resources
C:\Users\Administrator\Desktop\1.连接云数据库以及云服务器版本\OSNSystem\OSNSystem\OSNSystem\obj\x86\Debug\OSNSystem.SetChlTur.resources
C:\Users\Administrator\Desktop\1.连接云数据库以及云服务器版本\OSNSystem\OSNSystem\OSNSystem\obj\x86\Debug\OSNSystem.SetPicScope.resources
C:\Users\Administrator\Desktop\1.连接云数据库以及云服务器版本\OSNSystem\OSNSystem\OSNSystem\obj\x86\Debug\OSNSystem.ShowCTDFigure.resources
C:\Users\Administrator\Desktop\1.连接云数据库以及云服务器版本\OSNSystem\OSNSystem\OSNSystem\obj\x86\Debug\OSNSystem.csproj.GenerateResource.cache
C:\Users\Administrator\Desktop\1.连接云数据库以及云服务器版本\OSNSystem\OSNSystem\OSNSystem\obj\x86\Debug\OSNSystem.csproj.CoreCompileInputs.cache
C:\Users\Administrator\Desktop\1.连接云数据库以及云服务器版本\OSNSystem\OSNSystem\OSNSystem\obj\x86\Debug\OSNSystem.csproj.CopyComplete
C:\Users\Administrator\Desktop\1.连接云数据库以及云服务器版本\OSNSystem\OSNSystem\OSNSystem\obj\x86\Debug\OSNSystem.exe
C:\Users\Administrator\Desktop\1.连接云数据库以及云服务器版本\OSNSystem\OSNSystem\OSNSystem\obj\x86\Debug\OSNSystem.pdb
