# Supplementary material
Source: MDPI journal article supplement (https://www.mdpi.com/2077-1312/10/8/1051)
Supplement: s1 [file s1 › OSNSystem/OSNSystem/OSNSystem/obj/x86/Debug/╝α┐╪.csproj.FileListAbsolute.txt]

C:\0.Monitor_test\1000点\OSNSystem\OSNSystem\bin\Debug\OSNSystem.exe.config
C:\0.Monitor_test\1000点\OSNSystem\OSNSystem\bin\Debug\OSNSystem.exe
C:\0.Monitor_test\1000点\OSNSystem\OSNSystem\bin\Debug\OSNSystem.pdb
C:\0.Monitor_test\1000点\OSNSystem\OSNSystem\bin\Debug\mysql.data.dll
C:\0.Monitor_test\1000点\OSNSystem\OSNSystem\bin\Debug\TeeChart.dll
C:\0.Monitor_test\1000点\OSNSystem\OSNSystem\bin\Debug\TeeChart.xml
C:\0.Monitor_test\1000点\OSNSystem\OSNSystem\obj\x86\Debug\OSNSystem.cmdSet.resources
C:\0.Monitor_test\1000点\OSNSystem\OSNSystem\obj\x86\Debug\OSNSystem.commandAdd.resources
C:\0.Monitor_test\1000点\OSNSystem\OSNSystem\obj\x86\Debug\OSNSystem.Main.resources
C:\0.Monitor_test\1000点\OSNSystem\OSNSystem\obj\x86\Debug\OSNSystem.Properties.Resources.resources
C:\0.Monitor_test\1000点\OSNSystem\OSNSystem\obj\x86\Debug\OSNSystem.SetDO.resources
C:\0.Monitor_test\1000点\OSNSystem\OSNSystem\obj\x86\Debug\监控.csproj.GenerateResource.Cache
C:\0.Monitor_test\1000点\OSNSystem\OSNSystem\obj\x86\Debug\OSNSystem.exe
C:\0.Monitor_test\1000点\OSNSystem\OSNSystem\obj\x86\Debug\OSNSystem.pdb
