# Supplementary material
Source: MDPI journal article supplement (https://www.mdpi.com/2077-1312/10/8/1051)
Supplement: s1 [file s1 › OSNSystem/OSNSystem/OSNSystem/OSNSystem.csproj]

<?xml version="1.0" encoding="utf-8"?>
<Project ToolsVersion="12.0" DefaultTargets="Build" xmlns="http://schemas.microsoft.com/developer/msbuild/2003">
  <PropertyGroup>
    <Configuration Condition=" '$(Configuration)' == '' ">Debug</Configuration>
    <Platform Condition=" '$(Platform)' == '' ">x86</Platform>
    <ProductVersion>8.0.30703</ProductVersion>
    <SchemaVersion>2.0</SchemaVersion>
    <ProjectGuid>{77B601DC-BC42-4E6C-9921-D62670669665}</ProjectGuid>
    <OutputType>WinExe</OutputType>
    <AppDesignerFolder>Properties</AppDesignerFolder>
    <RootNamespace>OSNSystem</RootNamespace>
    <AssemblyName>OSNSystem</AssemblyName>
    <TargetFrameworkVersion>v4.5.2</TargetFrameworkVersion>
    <TargetFrameworkProfile>
    </TargetFrameworkProfile>
    <FileAlignment>512</FileAlignment>
  </PropertyGroup>
  <PropertyGroup Condition=" '$(Configuration)|$(Platform)' == 'Debug|x86' ">
    <PlatformTarget>x86</PlatformTarget>
    <DebugSymbols>true</DebugSymbols>
    <DebugType>full</DebugType>
    <Optimize>false</Optimize>
    <OutputPath>bin\Debug\</OutputPath>
    <DefineConstants>DEBUG;TRACE</DefineConstants>
    <ErrorReport>prompt</ErrorReport>
    <WarningLevel>4</WarningLevel>
    <Prefer32Bit>false</Prefer32Bit>
  </PropertyGroup>
  <PropertyGroup Condition=" '$(Configuration)|$(Platform)' == 'Release|x86' ">
    <PlatformTarget>x86</PlatformTarget>
    <DebugType>pdbonly</DebugType>
    <Optimize>true</Optimize>
    <OutputPath>bin\Release\</OutputPath>
    <DefineConstants>TRACE</DefineConstants>
    <ErrorReport>prompt</ErrorReport>
    <WarningLevel>4</WarningLevel>
    <Prefer32Bit>false</Prefer32Bit>
  </PropertyGroup>
  <PropertyGroup>
    <ApplicationIcon>favicon.ico</ApplicationIcon>
  </PropertyGroup>
  <PropertyGroup>
    <TargetZone>LocalIntranet</TargetZone>
  </PropertyGroup>
  <PropertyGroup>
    <GenerateManifests>false</GenerateManifests>
  </PropertyGroup>
  <PropertyGroup>
    <ApplicationManifest>Properties\app.manifest</ApplicationManifest>
  </PropertyGroup>
  <ItemGroup>
    <Reference Include="Microsoft.Office.Interop.Excel, Version=12.0.0.0, Culture=neutral, PublicKeyToken=71e9bce111e9429c">
      <EmbedInteropTypes>True</EmbedInteropTypes>
    </Reference>
    <Reference Include="MySql.Data %282%29, Version=8.0.28.0, Culture=neutral, PublicKeyToken=c5687fc88969c44d, processorArchitecture=MSIL">
      <SpecificVersion>False</SpecificVersion>
      <HintPath>bin\Debug\MySql.Data (2).dll</HintPath>
    </Reference>
    <Reference Include="System" />
    <Reference Include="System.Core" />
    <Reference Include="System.Windows.Forms.DataVisualization" />
    <Reference Include="System.Xml.Linq" />
    <Reference Include="System.Data.DataSetExtensions" />
    <Reference Include="Microsoft.CSharp" />
    <Reference Include="System.Data" />
    <Reference Include="System.Deployment" />
    <Reference Include="System.Drawing" />
    <Reference Include="System.Windows.Forms" />
    <Reference Include="System.Xml" />
    <Reference Include="TeeChart">
      <HintPath>.\TeeChart.dll</HintPath>
    </Reference>
  </ItemGroup>
  <ItemGroup>
    <Compile Include="1MySerClass.cs" />
    <Compile Include="1MySerClass2.cs" />
    <Compile Include="1MySerClass3.cs" />
    <Compile Include="2DrawClass.cs" />
    <Compile Include="3ReceieveMsgClass.cs" />
    <Compile Include="3ReceieveMsgClass2.cs" />
    <Compile Include="4DrawSensor.cs" />
    <Compile Include="4MyClientClass.cs" />
    <Compile Include="4MyClientClass2.cs" />
    <Compile Include="4MyClientClass3.cs" />
    <Compile Include="cmdCollectSet.cs">
      <SubType>Form</SubType>
    </Compile>
    <Compile Include="cmdCollectSet.Designer.cs">
      <DependentUpon>cmdCollectSet.cs</DependentUpon>
    </Compile>
    <Compile Include="cmdSet.cs">
      <SubType>Form</SubType>
    </Compile>
    <Compile Include="cmdSet.designer.cs">
      <DependentUpon>cmdSet.cs</DependentUpon>
    </Compile>
    <Compile Include="CRC32.cs" />
    <Compile Include="dataList.cs" />
    <Compile Include="draw.cs" />
    <Compile Include="drawTotal.cs" />
    <Compile Include="ECSSocket.cs" />
    <Compile Include="FontClass.cs" />
    <Compile Include="LogClass.cs" />
    <Compile Include="LogCommand.cs" />
    <Compile Include="LogConnect.cs" />
    <Compile Include="LogDataUpLoad.cs" />
    <Compile Include="LogFaultUpLoad.cs" />
    <Compile Include="Main.cs">
      <SubType>Form</SubType>
    </Compile>
    <Compile Include="Main.Designer.cs">
      <DependentUpon>Main.cs</DependentUpon>
    </Compile>
    <Compile Include="platformStatus.cs" />
    <Compile Include="Program.cs" />
    <Compile Include="Properties\AssemblyInfo.cs" />
    <Compile Include="SendMessageClass.cs" />
    <Compile Include="SensorConfig.cs">
      <SubType>Form</SubType>
    </Compile>
    <Compile Include="SensorConfig.Designer.cs">
      <DependentUpon>SensorConfig.cs</DependentUpon>
    </Compile>
    <Compile Include="SetCamera.cs">
      <SubType>Form</SubType>
    </Compile>
    <Compile Include="SetCamera.Designer.cs">
      <DependentUpon>SetCamera.cs</DependentUpon>
    </Compile>
    <Compile Include="SetCTD.cs">
      <SubType>Form</SubType>
    </Compile>
    <Compile Include="SetCTD.Designer.cs">
      <DependentUpon>SetCTD.cs</DependentUpon>
    </Compile>
    <Compile Include="SetDO.cs">
      <SubType>Form</SubType>
    </Compile>
    <Compile Include="SetDO.Designer.cs">
      <DependentUpon>SetDO.cs</DependentUpon>
    </Compile>
    <Compile Include="SetMulti.cs">
      <SubType>Form</SubType>
    </Compile>
    <Compile Include="SetMulti.Designer.cs">
      <DependentUpon>SetMulti.cs</DependentUpon>
    </Compile>
    <Compile Include="SetPicScope.cs">
      <SubType>Form</SubType>
    </Compile>
    <Compile Include="SetPicScope.Designer.cs">
      <DependentUpon>SetPicScope.cs</DependentUpon>
    </Compile>
    <Compile Include="ShowCTDFigure.cs">
      <SubType>Form</SubType>
    </Compile>
    <Compile Include="ShowCTDFigure.Designer.cs">
      <DependentUpon>ShowCTDFigure.cs</DependentUpon>
    </Compile>
    <Compile Include="SqlHelper.cs" />
    <Compile Include="ThreadProcessBeidou.cs" />
    <Compile Include="ThreadProcessHighPower.cs" />
    <EmbeddedResource Include="cmdCollectSet.resx">
      <DependentUpon>cmdCollectSet.cs</DependentUpon>
      <SubType>Designer</SubType>
    </EmbeddedResource>
    <EmbeddedResource Include="cmdSet.resx">
      <DependentUpon>cmdSet.cs</DependentUpon>
      <SubType>Designer</SubType>
    </EmbeddedResource>
    <EmbeddedResource Include="Main.resx">
      <DependentUpon>Main.cs</DependentUpon>
      <SubType>Designer</SubType>
    </EmbeddedResource>
    <EmbeddedResource Include="Properties\Resources.resx">
      <Generator>ResXFileCodeGenerator</Generator>
      <LastGenOutput>Resources.Designer.cs</LastGenOutput>
      <SubType>Designer</SubType>
    </EmbeddedResource>
    <Compile Include="Properties\Resources.Designer.cs">
      <AutoGen>True</AutoGen>
      <DependentUpon>Resources.resx</DependentUpon>
      <DesignTime>True</DesignTime>
    </Compile>
    <EmbeddedResource Include="SensorConfig.resx">
      <DependentUpon>SensorConfig.cs</DependentUpon>
    </EmbeddedResource>
    <EmbeddedResource Include="SetCamera.resx">
      <DependentUpon>SetCamera.cs</DependentUpon>
    </EmbeddedResource>
    <EmbeddedResource Include="SetCTD.resx">
      <DependentUpon>SetCTD.cs</DependentUpon>
    </EmbeddedResource>
    <EmbeddedResource Include="SetDO.resx">
      <DependentUpon>SetDO.cs</DependentUpon>
    </EmbeddedResource>
    <EmbeddedResource Include="SetMulti.resx">
      <DependentUpon>SetMulti.cs</DependentUpon>
    </EmbeddedResource>
    <EmbeddedResource Include="SetPicScope.resx">
      <DependentUpon>SetPicScope.cs</DependentUpon>
    </EmbeddedResource>
    <EmbeddedResource Include="ShowCTDFigure.resx">
      <DependentUpon>ShowCTDFigure.cs</DependentUpon>
    </EmbeddedResource>
    <None Include="app.config">
      <SubType>Designer</SubType>
    </None>
    <None Include="Properties\app.manifest" />
    <None Include="Properties\Settings.settings">
      <Generator>SettingsSingleFileGenerator</Generator>
      <LastGenOutput>Settings.Designer.cs</LastGenOutput>
    </None>
    <Compile Include="Properties\Settings.Designer.cs">
      <AutoGen>True</AutoGen>
      <DependentUpon>Settings.settings</DependentUpon>
      <DesignTimeSharedInput>True</DesignTimeSharedInput>
    </Compile>
  </ItemGroup>
  <ItemGroup>
    <Content Include="favicon.ico" />
  </ItemGroup>
  <Import Project="$(MSBuildToolsPath)\Microsoft.CSharp.targets" />
  <!-- To modify your build process, add your task inside one of the targets below and uncomment it. 
       Other similar extension points exist, see Microsoft.Common.targets.
  <Target Name="BeforeBuild">
  </Target>
  <Target Name="AfterBuild">
  </Target>
  -->
</Project>
