# Supplementary material
Source: MDPI journal article supplement (https://www.mdpi.com/2077-1312/10/8/1051)
Supplement: s1 [file s1 › OSNSystem/OSNSystem/OSNSystem/Program.cs]

using System;
using System.Collections.Generic;
using System.Linq;
using System.Windows.Forms;

namespace OSNSystem
{
    static class Program
    {
        /// <summary>
        /// 应用程序的主入口点。
        /// </summary>
        [STAThread]
       // public static Main f = new Main();
        static void Main()
        {
            Application.EnableVisualStyles();
            Application.SetCompatibleTextRenderingDefault(false);           
            Application.Run(new Main());           
        }
    }
}
