# Supplementary material
Source: MDPI journal article supplement (https://www.mdpi.com/2077-1312/10/8/1051)
Supplement: s1 [file s1 › OSNSystem/OSNSystem/OSNSystem/SensorConfig.Designer.cs]

namespace OSNSystem
{
    partial class SensorConfig
    {
        /// <summary>
        /// Required designer variable.
        /// </summary>
        private System.ComponentModel.IContainer components = null;

        /// <summary>
        /// Clean up any resources being used.
        /// </summary>
        /// <param name="disposing">true if managed resources should be disposed; otherwise, false.</param>
        protected override void Dispose(bool disposing)
        {
            if (disposing && (components != null))
            {
                components.Dispose();
            }
            base.Dispose(disposing);
        }

        #region Windows Form Designer generated code

        /// <summary>
        /// Required method for Designer support - do not modify
        /// the contents of this method with the code editor.
        /// </summary>
        private void InitializeComponent()
        {
            this.components = new System.ComponentModel.Container();
            System.Windows.Forms.TreeNode treeNode1 = new System.Windows.Forms.TreeNode("溶解氧");
            System.Windows.Forms.TreeNode treeNode2 = new System.Windows.Forms.TreeNode("叶绿素浊度");
            System.Windows.Forms.TreeNode treeNode3 = new System.Windows.Forms.TreeNode("CTD");
            System.Windows.Forms.TreeNode treeNode4 = new System.Windows.Forms.TreeNode("PH");
            System.Windows.Forms.TreeNode treeNode5 = new System.Windows.Forms.TreeNode("水下视频2");
            System.Windows.Forms.TreeNode treeNode6 = new System.Windows.Forms.TreeNode("数据采集器", new System.Windows.Forms.TreeNode[] {
            treeNode1,
            treeNode2,
            treeNode3,
            treeNode4,
            treeNode5});
            System.Windows.Forms.TreeNode treeNode7 = new System.Windows.Forms.TreeNode("水下视频1");
            System.Windows.Forms.TreeNode treeNode8 = new System.Windows.Forms.TreeNode("次接驳盒", new System.Windows.Forms.TreeNode[] {
            treeNode6,
            treeNode7});
            System.Windows.Forms.TreeNode treeNode9 = new System.Windows.Forms.TreeNode("主接驳盒", new System.Windows.Forms.TreeNode[] {
            treeNode8});
            System.ComponentModel.ComponentResourceManager resources = new System.ComponentModel.ComponentResourceManager(typeof(SensorConfig));
            System.Windows.Forms.DataGridViewCellStyle dataGridViewCellStyle1 = new System.Windows.Forms.DataGridViewCellStyle();
            System.Windows.Forms.DataGridViewCellStyle dataGridViewCellStyle2 = new System.Windows.Forms.DataGridViewCellStyle();
            System.Windows.Forms.DataGridViewCellStyle dataGridViewCellStyle3 = new System.Windows.Forms.DataGridViewCellStyle();
            System.Windows.Forms.DataGridViewCellStyle dataGridViewCellStyle4 = new System.Windows.Forms.DataGridViewCellStyle();
            System.Windows.Forms.DataGridViewCellStyle dataGridViewCellStyle5 = new System.Windows.Forms.DataGridViewCellStyle();
            System.Windows.Forms.DataGridViewCellStyle dataGridViewCellStyle6 = new System.Windows.Forms.DataGridViewCellStyle();
            System.Windows.Forms.DataGridViewCellStyle dataGridViewCellStyle7 = new System.Windows.Forms.DataGridViewCellStyle();
            System.Windows.Forms.DataGridViewCellStyle dataGridViewCellStyle8 = new System.Windows.Forms.DataGridViewCellStyle();
            this.treeView1 = new System.Windows.Forms.TreeView();
            this.imageList1 = new System.Windows.Forms.ImageList(this.components);
            this.panel1 = new System.Windows.Forms.Panel();
            this.tableLayoutPanel1 = new System.Windows.Forms.TableLayoutPanel();
            this.panel2 = new System.Windows.Forms.Panel();
            this.label4 = new System.Windows.Forms.Label();
            this.groupBox2 = new System.Windows.Forms.GroupBox();
            this.dataGridView1 = new System.Windows.Forms.DataGridView();
            this.groupBox1 = new System.Windows.Forms.GroupBox();
            this.dataGridView2 = new System.Windows.Forms.DataGridView();
            this.panel1.SuspendLayout();
            this.tableLayoutPanel1.SuspendLayout();
            this.panel2.SuspendLayout();
            this.groupBox2.SuspendLayout();
            ((System.ComponentModel.ISupportInitialize)(this.dataGridView1)).BeginInit();
            this.groupBox1.SuspendLayout();
            ((System.ComponentModel.ISupportInitialize)(this.dataGridView2)).BeginInit();
            this.SuspendLayout();
            // 
            // treeView1
            // 
            this.treeView1.BackColor = System.Drawing.Color.White;
            this.treeView1.Dock = System.Windows.Forms.DockStyle.Fill;
            this.treeView1.Font = new System.Drawing.Font("Times New Roman", 9F, System.Drawing.FontStyle.Regular, System.Drawing.GraphicsUnit.Point, ((byte)(0)));
            this.treeView1.ForeColor = System.Drawing.Color.Black;
            this.treeView1.ImageIndex = 0;
            this.treeView1.ImageList = this.imageList1;
            this.treeView1.ItemHeight = 28;
            this.treeView1.Location = new System.Drawing.Point(3, 42);
            this.treeView1.Name = "treeView1";
            treeNode1.ImageIndex = 2;
            treeNode1.Name = "节点11";
            treeNode1.Text = "溶解氧";
            treeNode2.ImageIndex = 2;
            treeNode2.Name = "节点3";
            treeNode2.Text = "叶绿素浊度";
            treeNode3.ImageIndex = 2;
            treeNode3.Name = "节点4";
            treeNode3.Text = "CTD";
            treeNode4.ImageIndex = 2;
            treeNode4.Name = "节点5";
            treeNode4.Text = "PH";
            treeNode5.ImageIndex = 2;
            treeNode5.Name = "节点6";
            treeNode5.Text = "水下视频2";
            treeNode6.ImageIndex = 1;
            treeNode6.Name = "节点3";
            treeNode6.Text = "数据采集器";
            treeNode7.ImageIndex = 2;
            treeNode7.Name = "节点4";
            treeNode7.Text = "水下视频1";
            treeNode8.Name = "节点1";
            treeNode8.Text = "次接驳盒";
            treeNode9.ImageIndex = -2;
            treeNode9.Name = "节点0";
            treeNode9.Text = "主接驳盒";
            this.treeView1.Nodes.AddRange(new System.Windows.Forms.TreeNode[] {
            treeNode9});
            this.treeView1.SelectedImageIndex = 0;
            this.treeView1.Size = new System.Drawing.Size(246, 388);
            this.treeView1.TabIndex = 0;
            // 
            // imageList1
            // 
            this.imageList1.ImageStream = ((System.Windows.Forms.ImageListStreamer)(resources.GetObject("imageList1.ImageStream")));
            this.imageList1.TransparentColor = System.Drawing.Color.Transparent;
            this.imageList1.Images.SetKeyName(0, "2.次接驳盒.JPG");
            this.imageList1.Images.SetKeyName(1, "3.数据采集器.JPG");
            this.imageList1.Images.SetKeyName(2, "4.传感器标志.JPG");
            // 
            // panel1
            // 
            this.panel1.BackColor = System.Drawing.Color.White;
            this.panel1.Controls.Add(this.tableLayoutPanel1);
            this.panel1.Location = new System.Drawing.Point(1, 1);
            this.panel1.Name = "panel1";
            this.panel1.Size = new System.Drawing.Size(252, 433);
            this.panel1.TabIndex = 2;
            // 
            // tableLayoutPanel1
            // 
            this.tableLayoutPanel1.BackColor = System.Drawing.Color.FromArgb(((int)(((byte)(205)))), ((int)(((byte)(223)))), ((int)(((byte)(244)))));
            this.tableLayoutPanel1.ColumnCount = 1;
            this.tableLayoutPanel1.ColumnStyles.Add(new System.Windows.Forms.ColumnStyle(System.Windows.Forms.SizeType.Percent, 50F));
            this.tableLayoutPanel1.Controls.Add(this.treeView1, 0, 1);
            this.tableLayoutPanel1.Controls.Add(this.panel2, 0, 0);
            this.tableLayoutPanel1.Dock = System.Windows.Forms.DockStyle.Fill;
            this.tableLayoutPanel1.Location = new System.Drawing.Point(0, 0);
            this.tableLayoutPanel1.Name = "tableLayoutPanel1";
            this.tableLayoutPanel1.RowCount = 2;
            this.tableLayoutPanel1.RowStyles.Add(new System.Windows.Forms.RowStyle(System.Windows.Forms.SizeType.Percent, 9.006928F));
            this.tableLayoutPanel1.RowStyles.Add(new System.Windows.Forms.RowStyle(System.Windows.Forms.SizeType.Percent, 90.99307F));
            this.tableLayoutPanel1.Size = new System.Drawing.Size(252, 433);
            this.tableLayoutPanel1.TabIndex = 0;
            // 
            // panel2
            // 
            this.panel2.BackColor = System.Drawing.Color.FromArgb(((int)(((byte)(205)))), ((int)(((byte)(223)))), ((int)(((byte)(244)))));
            this.panel2.Controls.Add(this.label4);
            this.panel2.Dock = System.Windows.Forms.DockStyle.Fill;
            this.panel2.Location = new System.Drawing.Point(3, 3);
            this.panel2.Name = "panel2";
            this.panel2.Size = new System.Drawing.Size(246, 33);
            this.panel2.TabIndex = 0;
            // 
            // label4
            // 
            this.label4.AutoSize = true;
            this.label4.Font = new System.Drawing.Font("宋体", 9F, System.Drawing.FontStyle.Bold, System.Drawing.GraphicsUnit.Point, ((byte)(134)));
            this.label4.Location = new System.Drawing.Point(51, 14);
            this.label4.Name = "label4";
            this.label4.Size = new System.Drawing.Size(109, 12);
            this.label4.TabIndex = 0;
            this.label4.Text = "海底网网络拓扑图";
            // 
            // groupBox2
            // 
            this.groupBox2.Controls.Add(this.dataGridView1);
            this.groupBox2.Font = new System.Drawing.Font("宋体", 9F, System.Drawing.FontStyle.Regular, System.Drawing.GraphicsUnit.Point, ((byte)(134)));
            this.groupBox2.Location = new System.Drawing.Point(259, 1);
            this.groupBox2.Name = "groupBox2";
            this.groupBox2.Size = new System.Drawing.Size(800, 155);
            this.groupBox2.TabIndex = 3;
            this.groupBox2.TabStop = false;
            this.groupBox2.Text = "设备信息";
            // 
            // dataGridView1
            // 
            dataGridViewCellStyle1.BackColor = System.Drawing.Color.LightCyan;
            this.dataGridView1.AlternatingRowsDefaultCellStyle = dataGridViewCellStyle1;
            dataGridViewCellStyle2.Alignment = System.Windows.Forms.DataGridViewContentAlignment.MiddleLeft;
            dataGridViewCellStyle2.BackColor = System.Drawing.Color.FromArgb(((int)(((byte)(234)))), ((int)(((byte)(242)))), ((int)(((byte)(250)))));
            dataGridViewCellStyle2.Font = new System.Drawing.Font("宋体", 9F, System.Drawing.FontStyle.Regular, System.Drawing.GraphicsUnit.Point, ((byte)(134)));
            dataGridViewCellStyle2.ForeColor = System.Drawing.SystemColors.WindowText;
            dataGridViewCellStyle2.SelectionBackColor = System.Drawing.SystemColors.Highlight;
            dataGridViewCellStyle2.SelectionForeColor = System.Drawing.SystemColors.HighlightText;
            dataGridViewCellStyle2.WrapMode = System.Windows.Forms.DataGridViewTriState.True;
            this.dataGridView1.ColumnHeadersDefaultCellStyle = dataGridViewCellStyle2;
            this.dataGridView1.ColumnHeadersHeightSizeMode = System.Windows.Forms.DataGridViewColumnHeadersHeightSizeMode.AutoSize;
            dataGridViewCellStyle3.Alignment = System.Windows.Forms.DataGridViewContentAlignment.MiddleLeft;
            dataGridViewCellStyle3.BackColor = System.Drawing.Color.FromArgb(((int)(((byte)(251)))), ((int)(((byte)(251)))), ((int)(((byte)(243)))));
            dataGridViewCellStyle3.Font = new System.Drawing.Font("宋体", 9F, System.Drawing.FontStyle.Regular, System.Drawing.GraphicsUnit.Point, ((byte)(134)));
            dataGridViewCellStyle3.ForeColor = System.Drawing.SystemColors.ControlText;
            dataGridViewCellStyle3.SelectionBackColor = System.Drawing.SystemColors.Highlight;
            dataGridViewCellStyle3.SelectionForeColor = System.Drawing.SystemColors.HighlightText;
            dataGridViewCellStyle3.WrapMode = System.Windows.Forms.DataGridViewTriState.False;
            this.dataGridView1.DefaultCellStyle = dataGridViewCellStyle3;
            this.dataGridView1.Dock = System.Windows.Forms.DockStyle.Fill;
            this.dataGridView1.EnableHeadersVisualStyles = false;
            this.dataGridView1.Location = new System.Drawing.Point(3, 17);
            this.dataGridView1.Name = "dataGridView1";
            dataGridViewCellStyle4.Alignment = System.Windows.Forms.DataGridViewContentAlignment.MiddleLeft;
            dataGridViewCellStyle4.BackColor = System.Drawing.Color.FromArgb(((int)(((byte)(234)))), ((int)(((byte)(242)))), ((int)(((byte)(250)))));
            dataGridViewCellStyle4.Font = new System.Drawing.Font("宋体", 9F, System.Drawing.FontStyle.Regular, System.Drawing.GraphicsUnit.Point, ((byte)(134)));
            dataGridViewCellStyle4.ForeColor = System.Drawing.SystemColors.WindowText;
            dataGridViewCellStyle4.SelectionBackColor = System.Drawing.SystemColors.Highlight;
            dataGridViewCellStyle4.SelectionForeColor = System.Drawing.SystemColors.HighlightText;
            dataGridViewCellStyle4.WrapMode = System.Windows.Forms.DataGridViewTriState.True;
            this.dataGridView1.RowHeadersDefaultCellStyle = dataGridViewCellStyle4;
            this.dataGridView1.RowTemplate.Height = 23;
            this.dataGridView1.Size = new System.Drawing.Size(794, 135);
            this.dataGridView1.TabIndex = 0;
            this.dataGridView1.RowPostPaint += new System.Windows.Forms.DataGridViewRowPostPaintEventHandler(this.dataGridView1_RowPostPaint);
            // 
            // groupBox1
            // 
            this.groupBox1.Controls.Add(this.dataGridView2);
            this.groupBox1.Font = new System.Drawing.Font("宋体", 9F, System.Drawing.FontStyle.Regular, System.Drawing.GraphicsUnit.Point, ((byte)(134)));
            this.groupBox1.Location = new System.Drawing.Point(259, 159);
            this.groupBox1.Name = "groupBox1";
            this.groupBox1.Size = new System.Drawing.Size(800, 155);
            this.groupBox1.TabIndex = 4;
            this.groupBox1.TabStop = false;
            this.groupBox1.Text = "动态配置信息";
            // 
            // dataGridView2
            // 
            dataGridViewCellStyle5.BackColor = System.Drawing.Color.LightCyan;
            this.dataGridView2.AlternatingRowsDefaultCellStyle = dataGridViewCellStyle5;
            dataGridViewCellStyle6.Alignment = System.Windows.Forms.DataGridViewContentAlignment.MiddleLeft;
            dataGridViewCellStyle6.BackColor = System.Drawing.Color.FromArgb(((int)(((byte)(234)))), ((int)(((byte)(242)))), ((int)(((byte)(250)))));
            dataGridViewCellStyle6.Font = new System.Drawing.Font("宋体", 9F, System.Drawing.FontStyle.Regular, System.Drawing.GraphicsUnit.Point, ((byte)(134)));
            dataGridViewCellStyle6.ForeColor = System.Drawing.SystemColors.WindowText;
            dataGridViewCellStyle6.SelectionBackColor = System.Drawing.SystemColors.Highlight;
            dataGridViewCellStyle6.SelectionForeColor = System.Drawing.SystemColors.HighlightText;
            dataGridViewCellStyle6.WrapMode = System.Windows.Forms.DataGridViewTriState.True;
            this.dataGridView2.ColumnHeadersDefaultCellStyle = dataGridViewCellStyle6;
            this.dataGridView2.ColumnHeadersHeightSizeMode = System.Windows.Forms.DataGridViewColumnHeadersHeightSizeMode.AutoSize;
            dataGridViewCellStyle7.Alignment = System.Windows.Forms.DataGridViewContentAlignment.MiddleLeft;
            dataGridViewCellStyle7.BackColor = System.Drawing.Color.FromArgb(((int)(((byte)(251)))), ((int)(((byte)(251)))), ((int)(((byte)(243)))));
            dataGridViewCellStyle7.Font = new System.Drawing.Font("宋体", 9F, System.Drawing.FontStyle.Regular, System.Drawing.GraphicsUnit.Point, ((byte)(134)));
            dataGridViewCellStyle7.ForeColor = System.Drawing.SystemColors.ControlText;
            dataGridViewCellStyle7.SelectionBackColor = System.Drawing.SystemColors.Highlight;
            dataGridViewCellStyle7.SelectionForeColor = System.Drawing.SystemColors.HighlightText;
            dataGridViewCellStyle7.WrapMode = System.Windows.Forms.DataGridViewTriState.False;
            this.dataGridView2.DefaultCellStyle = dataGridViewCellStyle7;
            this.dataGridView2.Dock = System.Windows.Forms.DockStyle.Fill;
            this.dataGridView2.EnableHeadersVisualStyles = false;
            this.dataGridView2.Location = new System.Drawing.Point(3, 17);
            this.dataGridView2.Name = "dataGridView2";
            dataGridViewCellStyle8.Alignment = System.Windows.Forms.DataGridViewContentAlignment.MiddleLeft;
            dataGridViewCellStyle8.BackColor = System.Drawing.Color.FromArgb(((int)(((byte)(234)))), ((int)(((byte)(242)))), ((int)(((byte)(250)))));
            dataGridViewCellStyle8.Font = new System.Drawing.Font("宋体", 9F, System.Drawing.FontStyle.Regular, System.Drawing.GraphicsUnit.Point, ((byte)(134)));
            dataGridViewCellStyle8.ForeColor = System.Drawing.SystemColors.WindowText;
            dataGridViewCellStyle8.SelectionBackColor = System.Drawing.SystemColors.Highlight;
            dataGridViewCellStyle8.SelectionForeColor = System.Drawing.SystemColors.HighlightText;
            dataGridViewCellStyle8.WrapMode = System.Windows.Forms.DataGridViewTriState.True;
            this.dataGridView2.RowHeadersDefaultCellStyle = dataGridViewCellStyle8;
            this.dataGridView2.RowTemplate.Height = 23;
            this.dataGridView2.Size = new System.Drawing.Size(794, 135);
            this.dataGridView2.TabIndex = 0;
            this.dataGridView2.RowPostPaint += new System.Windows.Forms.DataGridViewRowPostPaintEventHandler(this.dataGridView2_RowPostPaint);
            // 
            // SensorConfig
            // 
            this.AutoScaleDimensions = new System.Drawing.SizeF(6F, 12F);
            this.AutoScaleMode = System.Windows.Forms.AutoScaleMode.Font;
            this.BackColor = System.Drawing.Color.White;
            this.ClientSize = new System.Drawing.Size(1083, 317);
            this.Controls.Add(this.groupBox1);
            this.Controls.Add(this.groupBox2);
            this.Controls.Add(this.panel1);
            this.FormBorderStyle = System.Windows.Forms.FormBorderStyle.FixedDialog;
            this.Name = "SensorConfig";
            this.StartPosition = System.Windows.Forms.FormStartPosition.CenterScreen;
            this.Text = "海底观测网设备动态配置";
            this.Load += new System.EventHandler(this.SensorConfig_Load);
            this.panel1.ResumeLayout(false);
            this.tableLayoutPanel1.ResumeLayout(false);
            this.panel2.ResumeLayout(false);
            this.panel2.PerformLayout();
            this.groupBox2.ResumeLayout(false);
            ((System.ComponentModel.ISupportInitialize)(this.dataGridView1)).EndInit();
            this.groupBox1.ResumeLayout(false);
            ((System.ComponentModel.ISupportInitialize)(this.dataGridView2)).EndInit();
            this.ResumeLayout(false);

        }

        #endregion

        private System.Windows.Forms.TreeView treeView1;
        private System.Windows.Forms.ImageList imageList1;
        private System.Windows.Forms.Panel panel1;
        private System.Windows.Forms.Panel panel2;
        private System.Windows.Forms.Label label4;
        private System.Windows.Forms.TableLayoutPanel tableLayoutPanel1;
        private System.Windows.Forms.GroupBox groupBox2;
        private System.Windows.Forms.DataGridView dataGridView1;
        private System.Windows.Forms.GroupBox groupBox1;
        private System.Windows.Forms.DataGridView dataGridView2;
    }
}
