# Supplementary material
Source: MDPI journal article supplement (https://www.mdpi.com/2077-1312/10/8/1051)
Supplement: s1 [file s1 › OSNSystem/OSNSystem/OSNSystem/SensorConfig.resx]

<?xml version="1.0" encoding="utf-8"?>
<root>
  <!-- 
    Microsoft ResX Schema 
    
    Version 2.0
    
    The primary goals of this format is to allow a simple XML format 
    that is mostly human readable. The generation and parsing of the 
    various data types are done through the TypeConverter classes 
    associated with the data types.
    
    Example:
    
    ... ado.net/XML headers & schema ...
    <resheader name="resmimetype">text/microsoft-resx</resheader>
    <resheader name="version">2.0</resheader>
    <resheader name="reader">System.Resources.ResXResourceReader, System.Windows.Forms, ...</resheader>
    <resheader name="writer">System.Resources.ResXResourceWriter, System.Windows.Forms, ...</resheader>
    <data name="Name1"><value>this is my long string</value><comment>this is a comment</comment></data>
    <data name="Color1" type="System.Drawing.Color, System.Drawing">Blue</data>
    <data name="Bitmap1" mimetype="application/x-microsoft.net.object.binary.base64">
        <value>[base64 mime encoded serialized .NET Framework object]</value>
    </data>
    <data name="Icon1" type="System.Drawing.Icon, System.Drawing" mimetype="application/x-microsoft.net.object.bytearray.base64">
        <value>[base64 mime encoded string representing a byte array form of the .NET Framework object]</value>
        <comment>This is a comment</comment>
    </data>
                
    There are any number of "resheader" rows that contain simple 
    name/value pairs.
    
    Each data row contains a name, and value. The row also contains a 
    type or mimetype. Type corresponds to a .NET class that support 
    text/value conversion through the TypeConverter architecture. 
    Classes that don't support this are serialized and stored with the 
    mimetype set.
    
    The mimetype is used for serialized objects, and tells the 
    ResXResourceReader how to depersist the object. This is currently not 
    extensible. For a given mimetype the value must be set accordingly:
    
    Note - application/x-microsoft.net.object.binary.base64 is the format 
    that the ResXResourceWriter will generate, however the reader can 
    read any of the formats listed below.
    
    mimetype: application/x-microsoft.net.object.binary.base64
    value   : The object must be serialized with 
            : System.Runtime.Serialization.Formatters.Binary.BinaryFormatter
            : and then encoded with base64 encoding.
    
    mimetype: application/x-microsoft.net.object.soap.base64
    value   : The object must be serialized with 
            : System.Runtime.Serialization.Formatters.Soap.SoapFormatter
            : and then encoded with base64 encoding.

    mimetype: application/x-microsoft.net.object.bytearray.base64
    value   : The object must be serialized into a byte array 
            : using a System.ComponentModel.TypeConverter
            : and then encoded with base64 encoding.
    -->
  <xsd:schema id="root" xmlns="" xmlns:xsd="http://www.w3.org/2001/XMLSchema" xmlns:msdata="urn:schemas-microsoft-com:xml-msdata">
    <xsd:import namespace="http://www.w3.org/XML/1998/namespace" />
    <xsd:element name="root" msdata:IsDataSet="true">
      <xsd:complexType>
        <xsd:choice maxOccurs="unbounded">
          <xsd:element name="metadata">
            <xsd:complexType>
              <xsd:sequence>
                <xsd:element name="value" type="xsd:string" minOccurs="0" />
              </xsd:sequence>
              <xsd:attribute name="name" use="required" type="xsd:string" />
              <xsd:attribute name="type" type="xsd:string" />
              <xsd:attribute name="mimetype" type="xsd:string" />
              <xsd:attribute ref="xml:space" />
            </xsd:complexType>
          </xsd:element>
          <xsd:element name="assembly">
            <xsd:complexType>
              <xsd:attribute name="alias" type="xsd:string" />
              <xsd:attribute name="name" type="xsd:string" />
            </xsd:complexType>
          </xsd:element>
          <xsd:element name="data">
            <xsd:complexType>
              <xsd:sequence>
                <xsd:element name="value" type="xsd:string" minOccurs="0" msdata:Ordinal="1" />
                <xsd:element name="comment" type="xsd:string" minOccurs="0" msdata:Ordinal="2" />
              </xsd:sequence>
              <xsd:attribute name="name" type="xsd:string" use="required" msdata:Ordinal="1" />
              <xsd:attribute name="type" type="xsd:string" msdata:Ordinal="3" />
              <xsd:attribute name="mimetype" type="xsd:string" msdata:Ordinal="4" />
              <xsd:attribute ref="xml:space" />
            </xsd:complexType>
          </xsd:element>
          <xsd:element name="resheader">
            <xsd:complexType>
              <xsd:sequence>
                <xsd:element name="value" type="xsd:string" minOccurs="0" msdata:Ordinal="1" />
              </xsd:sequence>
              <xsd:attribute name="name" type="xsd:string" use="required" />
            </xsd:complexType>
          </xsd:element>
        </xsd:choice>
      </xsd:complexType>
    </xsd:element>
  </xsd:schema>
  <resheader name="resmimetype">
    <value>text/microsoft-resx</value>
  </resheader>
  <resheader name="version">
    <value>2.0</value>
  </resheader>
  <resheader name="reader">
    <value>System.Resources.ResXResourceReader, System.Windows.Forms, Version=4.0.0.0, Culture=neutral, PublicKeyToken=b77a5c561934e089</value>
  </resheader>
  <resheader name="writer">
    <value>System.Resources.ResXResourceWriter, System.Windows.Forms, Version=4.0.0.0, Culture=neutral, PublicKeyToken=b77a5c561934e089</value>
  </resheader>
  <metadata name="imageList1.TrayLocation" type="System.Drawing.Point, System.Drawing, Version=4.0.0.0, Culture=neutral, PublicKeyToken=b03f5f7f11d50a3a">
    <value>17, 17</value>
  </metadata>
  <data name="imageList1.ImageStream" mimetype="application/x-microsoft.net.object.binary.base64">
    <value>
        AAEAAAD/////AQAAAAAAAAAMAgAAAFdTeXN0ZW0uV2luZG93cy5Gb3JtcywgVmVyc2lvbj00LjAuMC4w
        LCBDdWx0dXJlPW5ldXRyYWwsIFB1YmxpY0tleVRva2VuPWI3N2E1YzU2MTkzNGUwODkFAQAAACZTeXN0
        ZW0uV2luZG93cy5Gb3Jtcy5JbWFnZUxpc3RTdHJlYW1lcgEAAAAERGF0YQcCAgAAAAkDAAAADwMAAAAG
        CwAAAk1TRnQBSQFMAgEBAwEAASgBAAEoAQABEAEAARABAAT/AQkBAAj/AUIBTQE2AQQGAAE2AQQCAAEo
        AwABQAMAARADAAEBAQABCAYAAQQYAAGAAgABgAMAAoABAAGAAwABgAEAAYABAAKAAgADwAEAAcAB3AHA
        AQAB8AHKAaYBAAEzBQABMwEAATMBAAEzAQACMwIAAxYBAAMcAQADIgEAAykBAANVAQADTQEAA0IBAAM5
        AQABgAF8Af8BAAJQAf8BAAGTAQAB1gEAAf8B7AHMAQABxgHWAe8BAAHWAucBAAGQAakBrQIAAf8BMwMA
        AWYDAAGZAwABzAIAATMDAAIzAgABMwFmAgABMwGZAgABMwHMAgABMwH/AgABZgMAAWYBMwIAAmYCAAFm
        AZkCAAFmAcwCAAFmAf8CAAGZAwABmQEzAgABmQFmAgACmQIAAZkBzAIAAZkB/wIAAcwDAAHMATMCAAHM
        AWYCAAHMAZkCAALMAgABzAH/AgAB/wFmAgAB/wGZAgAB/wHMAQABMwH/AgAB/wEAATMBAAEzAQABZgEA
        ATMBAAGZAQABMwEAAcwBAAEzAQAB/wEAAf8BMwIAAzMBAAIzAWYBAAIzAZkBAAIzAcwBAAIzAf8BAAEz
        AWYCAAEzAWYBMwEAATMCZgEAATMBZgGZAQABMwFmAcwBAAEzAWYB/wEAATMBmQIAATMBmQEzAQABMwGZ
        AWYBAAEzApkBAAEzAZkBzAEAATMBmQH/AQABMwHMAgABMwHMATMBAAEzAcwBZgEAATMBzAGZAQABMwLM
        AQABMwHMAf8BAAEzAf8BMwEAATMB/wFmAQABMwH/AZkBAAEzAf8BzAEAATMC/wEAAWYDAAFmAQABMwEA
        AWYBAAFmAQABZgEAAZkBAAFmAQABzAEAAWYBAAH/AQABZgEzAgABZgIzAQABZgEzAWYBAAFmATMBmQEA
        AWYBMwHMAQABZgEzAf8BAAJmAgACZgEzAQADZgEAAmYBmQEAAmYBzAEAAWYBmQIAAWYBmQEzAQABZgGZ
        AWYBAAFmApkBAAFmAZkBzAEAAWYBmQH/AQABZgHMAgABZgHMATMBAAFmAcwBmQEAAWYCzAEAAWYBzAH/
        AQABZgH/AgABZgH/ATMBAAFmAf8BmQEAAWYB/wHMAQABzAEAAf8BAAH/AQABzAEAApkCAAGZATMBmQEA
        AZkBAAGZAQABmQEAAcwBAAGZAwABmQIzAQABmQEAAWYBAAGZATMBzAEAAZkBAAH/AQABmQFmAgABmQFm
        ATMBAAGZATMBZgEAAZkBZgGZAQABmQFmAcwBAAGZATMB/wEAApkBMwEAApkBZgEAA5kBAAKZAcwBAAKZ
        Af8BAAGZAcwCAAGZAcwBMwEAAWYBzAFmAQABmQHMAZkBAAGZAswBAAGZAcwB/wEAAZkB/wIAAZkB/wEz
        AQABmQHMAWYBAAGZAf8BmQEAAZkB/wHMAQABmQL/AQABzAMAAZkBAAEzAQABzAEAAWYBAAHMAQABmQEA
        AcwBAAHMAQABmQEzAgABzAIzAQABzAEzAWYBAAHMATMBmQEAAcwBMwHMAQABzAEzAf8BAAHMAWYCAAHM
        AWYBMwEAAZkCZgEAAcwBZgGZAQABzAFmAcwBAAGZAWYB/wEAAcwBmQIAAcwBmQEzAQABzAGZAWYBAAHM
        ApkBAAHMAZkBzAEAAcwBmQH/AQACzAIAAswBMwEAAswBZgEAAswBmQEAA8wBAALMAf8BAAHMAf8CAAHM
        Af8BMwEAAZkB/wFmAQABzAH/AZkBAAHMAf8BzAEAAcwC/wEAAcwBAAEzAQAB/wEAAWYBAAH/AQABmQEA
        AcwBMwIAAf8CMwEAAf8BMwFmAQAB/wEzAZkBAAH/ATMBzAEAAf8BMwH/AQAB/wFmAgAB/wFmATMBAAHM
        AmYBAAH/AWYBmQEAAf8BZgHMAQABzAFmAf8BAAH/AZkCAAH/AZkBMwEAAf8BmQFmAQAB/wKZAQAB/wGZ
        AcwBAAH/AZkB/wEAAf8BzAIAAf8BzAEzAQAB/wHMAWYBAAH/AcwBmQEAAf8CzAEAAf8BzAH/AQAC/wEz
        AQABzAH/AWYBAAL/AZkBAAL/AcwBAAJmAf8BAAFmAf8BZgEAAWYC/wEAAf8CZgEAAf8BZgH/AQAC/wFm
        AQABIQEAAaUBAANfAQADdwEAA4YBAAOWAQADywEAA7IBAAPXAQAD3QEAA+MBAAPqAQAD8QEAA/gBAAHw
        AfsB/wEAAaQCoAEAA4ADAAH/AgAB/wMAAv8BAAH/AwAB/wEAAf8BAAL/AgAD/wEAAdMB2QHTAbIB2QPT
        ArgDsgHZAtMB2QKyAdkB0wHZBdMB2QXTAdkBswGyDNMQAAHZAdMCsgGzAbIGswKyA9MBugH3AbIH0wGy
        AdMBsgPTAbgBswGKA9MB2QjTEAACsgENARQBSgHqAksBTAJSAZkBSgFsAbIB0wG4AboB6gGzAdMBsgTT
        AbMBtAGzA9MC2QENAWsCsgHZAbgC0wGyBdMQAAGyAbMCRAFLAQ8FTAG2AbQBkAEGAtMBswHtAbMCsgPT
        AdkBswHqAbMBsgPTAbIBFQENAYsBswGyAdMC2QKyAdMB2QLTEAAB0wGzAm4BEAEOAkwBUgFMAXQBBwG0
        AQ0BbAGyAdMBuAFtAmwBiwGQAbMCsgGzARMBuATTAbIBEQHqARUBZQGzAbIC0wHZAbIB0wHZAtMQAAHT
        AbMBbwEQASIBdAJMAVIBTAGUAesBkAEOAYsBsgHTAbMB6gESAZIBFQFDAg4B9wFsAW0BsgG4A9MBswEU
        AZMB7wFtAQ0BiwGzAtMB2QHTAdkC0xAAAdMBsgF0AUsBRAEiAXQBTAJSAZMBiwEOAZEBsgHZAdMBswHr
        ARQBEwERARUBEAGSARIBEwESAZEBswG4AdkB0wGzARUBBwMcARUBZQGzAbIC0wGyAtMQAALTAbQBkwF0
        AW8DTAFSARIBkAENAbkB2QHTAbIB0wGSAUMB6wFtAeoB6wG8AQgB7wFtAcEBuQLaAbgBiwEOAe8B8AHv
        Ae0B7wHqAQ0BkAGzAbID0xAAAdMB2QHTAe0BSwJ0A0wBZgGzAYoBsgTTAZEBbQH3Au8BvAFDAeoB6wFy
        AboBsgLTAbgBiwEVAWwB9wHwAe8B7AEcAfcBEQFrAbMD0xAAAdMB2QHTAbMB7AFzAUsBSgFMAUsBiwG5
        AbIB0wG4AtMBsgH3ARUBbQEPARIB9wERAkMBmAGyA9MBsgOzAWwB7AIHAZIB7AG8ARMBDQKyAdMQAATT
        AbkB7AFKAUsB6wFtAewBigHUAdMB2QPTAbUB/wHwAf8B8QH0AfIB8AEVAZ0B0wG4AtMB2QOyAbMBiwFt
        Ae8BBwEcAewBHAHsAbMB2QHTEAAD0wG4AdMBsgG4A7MCsgHZAbgE0wG6BbMBugGQAUMBugGyA9MC2QGy
        AdMB2QGyAbMBbAGSAbwBBwHsAe0BrgGyAdMQABLTAbQBuAKyArMBsgG4AewBugKyBNMB2QHTAbIC0wGz
        AYsB6wHvAbwBkwFvAbMB2RAAEtMIswG0A7IC0wG4AbIB2QTTAbgBswGQAWwB9wG8AXQBCQHZEAAQ0wGy
        BtMC2QG4AbIF0wHZAdMD2QHTAbIB0wHZAbIBswFsApEBuQHTEAAS0wK4AdMBsgHTAdkB0wGyAdMBsgHZ
        AbgC0wHZAtMBsgK4AdkBuAPZArMB2gLZEAABQgFNAT4HAAE+AwABKAMAAUADAAEQAwABAQEAAQEFAAGA
        FwAD/4EACw==
</value>
  </data>
</root>
