# Supplementary material
Source: MDPI journal article supplement (https://www.mdpi.com/2077-1312/10/8/1051)
Supplement: s1 [file s1 › OSNSystem/OSNSystem/OSNSystem/SetCTD.Designer.cs]

namespace OSNSystem
{
    partial class SetCTD
    {
        /// <summary>
        /// Required designer variable.
        /// </summary>
        private System.ComponentModel.IContainer components = null;

        /// <summary>
        /// Clean up any resources being used.
        /// </summary>
        /// <param name="disposing">true if managed resources should be disposed; otherwise, false.</param>
        protected override void Dispose(bool disposing)
        {
            if (disposing && (components != null))
            {
                components.Dispose();
            }
            base.Dispose(disposing);
        }

        #region Windows Form Designer generated code

        /// <summary>
        /// Required method for Designer support - do not modify
        /// the contents of this method with the code editor.
        /// </summary>
        private void InitializeComponent()
        {
            this.tableLayoutPanel1 = new System.Windows.Forms.TableLayoutPanel();
            this.txtInterval = new System.Windows.Forms.TextBox();
            this.panel1 = new System.Windows.Forms.Panel();
            this.label1 = new System.Windows.Forms.Label();
            this.button1 = new System.Windows.Forms.Button();
            this.button2 = new System.Windows.Forms.Button();
            this.button3 = new System.Windows.Forms.Button();
            this.tableLayoutPanel1.SuspendLayout();
            this.panel1.SuspendLayout();
            this.SuspendLayout();
            // 
            // tableLayoutPanel1
            // 
            this.tableLayoutPanel1.ColumnCount = 2;
            this.tableLayoutPanel1.ColumnStyles.Add(new System.Windows.Forms.ColumnStyle(System.Windows.Forms.SizeType.Percent, 50F));
            this.tableLayoutPanel1.ColumnStyles.Add(new System.Windows.Forms.ColumnStyle(System.Windows.Forms.SizeType.Percent, 50F));
            this.tableLayoutPanel1.Controls.Add(this.panel1, 0, 1);
            this.tableLayoutPanel1.Controls.Add(this.button1, 1, 1);
            this.tableLayoutPanel1.Controls.Add(this.button2, 1, 0);
            this.tableLayoutPanel1.Controls.Add(this.button3, 0, 0);
            this.tableLayoutPanel1.Dock = System.Windows.Forms.DockStyle.Fill;
            this.tableLayoutPanel1.Location = new System.Drawing.Point(0, 0);
            this.tableLayoutPanel1.Name = "tableLayoutPanel1";
            this.tableLayoutPanel1.RowCount = 2;
            this.tableLayoutPanel1.RowStyles.Add(new System.Windows.Forms.RowStyle(System.Windows.Forms.SizeType.Percent, 50F));
            this.tableLayoutPanel1.RowStyles.Add(new System.Windows.Forms.RowStyle(System.Windows.Forms.SizeType.Percent, 50F));
            this.tableLayoutPanel1.Size = new System.Drawing.Size(386, 91);
            this.tableLayoutPanel1.TabIndex = 0;
            // 
            // txtInterval
            // 
            this.txtInterval.Location = new System.Drawing.Point(80, 10);
            this.txtInterval.Name = "txtInterval";
            this.txtInterval.Size = new System.Drawing.Size(77, 21);
            this.txtInterval.TabIndex = 0;
            // 
            // panel1
            // 
            this.panel1.Controls.Add(this.label1);
            this.panel1.Controls.Add(this.txtInterval);
            this.panel1.Location = new System.Drawing.Point(3, 48);
            this.panel1.Name = "panel1";
            this.panel1.Size = new System.Drawing.Size(187, 40);
            this.panel1.TabIndex = 1;
            // 
            // label1
            // 
            this.label1.AutoSize = true;
            this.label1.Font = new System.Drawing.Font("宋体", 9F, System.Drawing.FontStyle.Bold, System.Drawing.GraphicsUnit.Point, ((byte)(134)));
            this.label1.Location = new System.Drawing.Point(9, 13);
            this.label1.Name = "label1";
            this.label1.Size = new System.Drawing.Size(70, 12);
            this.label1.TabIndex = 1;
            this.label1.Text = "时间间隔：";
            // 
            // button1
            // 
            this.button1.Dock = System.Windows.Forms.DockStyle.Fill;
            this.button1.FlatStyle = System.Windows.Forms.FlatStyle.Flat;
            this.button1.ForeColor = System.Drawing.Color.Blue;
            this.button1.Location = new System.Drawing.Point(196, 48);
            this.button1.Name = "button1";
            this.button1.Size = new System.Drawing.Size(187, 40);
            this.button1.TabIndex = 2;
            this.button1.Text = "设置时间间隔";
            this.button1.UseVisualStyleBackColor = true;
            this.button1.Click += new System.EventHandler(this.button1_Click);
            // 
            // button2
            // 
            this.button2.Dock = System.Windows.Forms.DockStyle.Fill;
            this.button2.FlatStyle = System.Windows.Forms.FlatStyle.Flat;
            this.button2.ForeColor = System.Drawing.Color.Blue;
            this.button2.Location = new System.Drawing.Point(196, 3);
            this.button2.Name = "button2";
            this.button2.Size = new System.Drawing.Size(187, 39);
            this.button2.TabIndex = 3;
            this.button2.Text = "2.锚系模式";
            this.button2.UseVisualStyleBackColor = true;
            this.button2.Click += new System.EventHandler(this.button2_Click);
            // 
            // button3
            // 
            this.button3.Dock = System.Windows.Forms.DockStyle.Fill;
            this.button3.FlatStyle = System.Windows.Forms.FlatStyle.Flat;
            this.button3.ForeColor = System.Drawing.Color.Blue;
            this.button3.Location = new System.Drawing.Point(3, 3);
            this.button3.Name = "button3";
            this.button3.Size = new System.Drawing.Size(187, 39);
            this.button3.TabIndex = 4;
            this.button3.Text = "1.配置模式";
            this.button3.UseVisualStyleBackColor = true;
            this.button3.Click += new System.EventHandler(this.button3_Click);
            // 
            // SetCTD
            // 
            this.AutoScaleDimensions = new System.Drawing.SizeF(6F, 12F);
            this.AutoScaleMode = System.Windows.Forms.AutoScaleMode.Font;
            this.ClientSize = new System.Drawing.Size(386, 91);
            this.Controls.Add(this.tableLayoutPanel1);
            this.Name = "SetCTD";
            this.StartPosition = System.Windows.Forms.FormStartPosition.CenterScreen;
            this.Text = "CTD指令设置";
            this.Load += new System.EventHandler(this.SetCTD_Load);
            this.tableLayoutPanel1.ResumeLayout(false);
            this.panel1.ResumeLayout(false);
            this.panel1.PerformLayout();
            this.ResumeLayout(false);

        }

        #endregion

        private System.Windows.Forms.TableLayoutPanel tableLayoutPanel1;
        private System.Windows.Forms.Panel panel1;
        private System.Windows.Forms.Label label1;
        private System.Windows.Forms.TextBox txtInterval;
        private System.Windows.Forms.Button button1;
        private System.Windows.Forms.Button button2;
        private System.Windows.Forms.Button button3;
    }
}
