# Supplementary material
Source: MDPI journal article supplement (https://www.mdpi.com/2077-1312/10/8/1051)
Supplement: s1 [file s1 › OSNSystem/OSNSystem/OSNSystem/SetDO.Designer.cs]

namespace OSNSystem
{
    partial class SetDO
    {
        /// <summary>
        /// Required designer variable.
        /// </summary>
        private System.ComponentModel.IContainer components = null;

        /// <summary>
        /// Clean up any resources being used.
        /// </summary>
        /// <param name="disposing">true if managed resources should be disposed; otherwise, false.</param>
        protected override void Dispose(bool disposing)
        {
            if (disposing && (components != null))
            {
                components.Dispose();
            }
            base.Dispose(disposing);
        }

        #region Windows Form Designer generated code

        /// <summary>
        /// Required method for Designer support - do not modify
        /// the contents of this method with the code editor.
        /// </summary>
        private void InitializeComponent()
        {
            this.label1 = new System.Windows.Forms.Label();
            this.txtSal = new System.Windows.Forms.TextBox();
            this.label2 = new System.Windows.Forms.Label();
            this.txtInterval = new System.Windows.Forms.TextBox();
            this.button1 = new System.Windows.Forms.Button();
            this.button2 = new System.Windows.Forms.Button();
            this.SuspendLayout();
            // 
            // label1
            // 
            this.label1.AutoSize = true;
            this.label1.Location = new System.Drawing.Point(45, 57);
            this.label1.Name = "label1";
            this.label1.Size = new System.Drawing.Size(53, 12);
            this.label1.TabIndex = 0;
            this.label1.Text = "盐度值：";
            // 
            // txtSal
            // 
            this.txtSal.Location = new System.Drawing.Point(140, 54);
            this.txtSal.Name = "txtSal";
            this.txtSal.Size = new System.Drawing.Size(100, 21);
            this.txtSal.TabIndex = 1;
            // 
            // label2
            // 
            this.label2.AutoSize = true;
            this.label2.Location = new System.Drawing.Point(45, 105);
            this.label2.Name = "label2";
            this.label2.Size = new System.Drawing.Size(89, 12);
            this.label2.TabIndex = 2;
            this.label2.Text = "采集时间间隔：";
            // 
            // txtInterval
            // 
            this.txtInterval.Location = new System.Drawing.Point(140, 102);
            this.txtInterval.Name = "txtInterval";
            this.txtInterval.Size = new System.Drawing.Size(100, 21);
            this.txtInterval.TabIndex = 3;
            // 
            // button1
            // 
            this.button1.Location = new System.Drawing.Point(268, 54);
            this.button1.Name = "button1";
            this.button1.Size = new System.Drawing.Size(75, 23);
            this.button1.TabIndex = 4;
            this.button1.Text = "设置";
            this.button1.UseVisualStyleBackColor = true;
            this.button1.Click += new System.EventHandler(this.button1_Click);
            // 
            // button2
            // 
            this.button2.Location = new System.Drawing.Point(268, 99);
            this.button2.Name = "button2";
            this.button2.Size = new System.Drawing.Size(75, 23);
            this.button2.TabIndex = 5;
            this.button2.Text = "设置";
            this.button2.UseVisualStyleBackColor = true;
            this.button2.Click += new System.EventHandler(this.button2_Click);
            // 
            // SetDO
            // 
            this.AutoScaleDimensions = new System.Drawing.SizeF(6F, 12F);
            this.AutoScaleMode = System.Windows.Forms.AutoScaleMode.Font;
            this.ClientSize = new System.Drawing.Size(373, 165);
            this.Controls.Add(this.button2);
            this.Controls.Add(this.button1);
            this.Controls.Add(this.txtInterval);
            this.Controls.Add(this.label2);
            this.Controls.Add(this.txtSal);
            this.Controls.Add(this.label1);
            this.MaximizeBox = false;
            this.Name = "SetDO";
            this.StartPosition = System.Windows.Forms.FormStartPosition.CenterScreen;
            this.Text = "溶解氧指令设置";
            this.Load += new System.EventHandler(this.SetDO_Load);
            this.ResumeLayout(false);
            this.PerformLayout();

        }

        #endregion

        private System.Windows.Forms.Label label1;
        private System.Windows.Forms.TextBox txtSal;
        private System.Windows.Forms.Label label2;
        private System.Windows.Forms.TextBox txtInterval;
        private System.Windows.Forms.Button button1;
        private System.Windows.Forms.Button button2;
    }
}
