# Supplementary material
Source: MDPI journal article supplement (https://www.mdpi.com/2077-1312/10/8/1051)
Supplement: s1 [file s1 › OSNSystem/OSNSystem/OSNSystem/SetMulti.Designer.cs]

namespace OSNSystem
{
    partial class SetChlTur
    {
        /// <summary>
        /// Required designer variable.
        /// </summary>
        private System.ComponentModel.IContainer components = null;

        /// <summary>
        /// Clean up any resources being used.
        /// </summary>
        /// <param name="disposing">true if managed resources should be disposed; otherwise, false.</param>
        protected override void Dispose(bool disposing)
        {
            if (disposing && (components != null))
            {
                components.Dispose();
            }
            base.Dispose(disposing);
        }

        #region Windows Form Designer generated code

        /// <summary>
        /// Required method for Designer support - do not modify
        /// the contents of this method with the code editor.
        /// </summary>
        private void InitializeComponent()
        {
            this.button1 = new System.Windows.Forms.Button();
            this.label1 = new System.Windows.Forms.Label();
            this.comboBox1 = new System.Windows.Forms.ComboBox();
            this.button2 = new System.Windows.Forms.Button();
            this.button4 = new System.Windows.Forms.Button();
            this.SuspendLayout();
            // 
            // button1
            // 
            this.button1.FlatStyle = System.Windows.Forms.FlatStyle.Flat;
            this.button1.ForeColor = System.Drawing.Color.FromArgb(((int)(((byte)(0)))), ((int)(((byte)(192)))), ((int)(((byte)(192)))));
            this.button1.Location = new System.Drawing.Point(143, 23);
            this.button1.Name = "button1";
            this.button1.Size = new System.Drawing.Size(100, 23);
            this.button1.TabIndex = 0;
            this.button1.Text = "改变采样间隔";
            this.button1.UseVisualStyleBackColor = true;
            this.button1.Click += new System.EventHandler(this.button1_Click);
            // 
            // label1
            // 
            this.label1.AutoSize = true;
            this.label1.Location = new System.Drawing.Point(12, 31);
            this.label1.Name = "label1";
            this.label1.Size = new System.Drawing.Size(59, 12);
            this.label1.TabIndex = 1;
            this.label1.Text = "采样间隔:";
            // 
            // comboBox1
            // 
            this.comboBox1.DropDownStyle = System.Windows.Forms.ComboBoxStyle.DropDownList;
            this.comboBox1.FormattingEnabled = true;
            this.comboBox1.Items.AddRange(new object[] {
            "5s",
            "10s",
            "15s",
            "20s",
            "30s",
            "40s"});
            this.comboBox1.Location = new System.Drawing.Point(77, 25);
            this.comboBox1.Name = "comboBox1";
            this.comboBox1.Size = new System.Drawing.Size(60, 20);
            this.comboBox1.TabIndex = 2;
            // 
            // button2
            // 
            this.button2.FlatStyle = System.Windows.Forms.FlatStyle.Flat;
            this.button2.ForeColor = System.Drawing.Color.FromArgb(((int)(((byte)(0)))), ((int)(((byte)(192)))), ((int)(((byte)(192)))));
            this.button2.Location = new System.Drawing.Point(14, 67);
            this.button2.Name = "button2";
            this.button2.Size = new System.Drawing.Size(100, 23);
            this.button2.TabIndex = 3;
            this.button2.Text = "转动清洁电刷";
            this.button2.UseVisualStyleBackColor = true;
            this.button2.Click += new System.EventHandler(this.button2_Click);
            // 
            // button4
            // 
            this.button4.FlatStyle = System.Windows.Forms.FlatStyle.Flat;
            this.button4.ForeColor = System.Drawing.Color.Red;
            this.button4.Location = new System.Drawing.Point(143, 67);
            this.button4.Name = "button4";
            this.button4.Size = new System.Drawing.Size(100, 23);
            this.button4.TabIndex = 5;
            this.button4.Text = "急停";
            this.button4.UseVisualStyleBackColor = true;
            this.button4.Click += new System.EventHandler(this.button4_Click);
            // 
            // SetChlTur
            // 
            this.AutoScaleDimensions = new System.Drawing.SizeF(6F, 12F);
            this.AutoScaleMode = System.Windows.Forms.AutoScaleMode.Font;
            this.ClientSize = new System.Drawing.Size(254, 109);
            this.Controls.Add(this.button4);
            this.Controls.Add(this.button2);
            this.Controls.Add(this.comboBox1);
            this.Controls.Add(this.label1);
            this.Controls.Add(this.button1);
            this.MaximizeBox = false;
            this.MinimizeBox = false;
            this.Name = "SetChlTur";
            this.StartPosition = System.Windows.Forms.FormStartPosition.CenterScreen;
            this.Text = "叶绿素浊度指令设置";
            this.Load += new System.EventHandler(this.SetMulti_Load);
            this.ResumeLayout(false);
            this.PerformLayout();

        }

        #endregion

        private System.Windows.Forms.Button button1;
        private System.Windows.Forms.Label label1;
        private System.Windows.Forms.ComboBox comboBox1;
        private System.Windows.Forms.Button button2;
        private System.Windows.Forms.Button button4;
    }
}
