# Supplementary material
Source: MDPI journal article supplement (https://www.mdpi.com/2077-1312/10/8/1051)
Supplement: s1 [file s1 › OSNSystem/OSNSystem/OSNSystem/SetPicScope.Designer.cs]

namespace OSNSystem
{
    partial class SetPicScope
    {
        /// <summary>
        /// Required designer variable.
        /// </summary>
        private System.ComponentModel.IContainer components = null;

        /// <summary>
        /// Clean up any resources being used.
        /// </summary>
        /// <param name="disposing">true if managed resources should be disposed; otherwise, false.</param>
        protected override void Dispose(bool disposing)
        {
            if (disposing && (components != null))
            {
                components.Dispose();
            }
            base.Dispose(disposing);
        }

        #region Windows Form Designer generated code

        /// <summary>
        /// Required method for Designer support - do not modify
        /// the contents of this method with the code editor.
        /// </summary>
        private void InitializeComponent()
        {
            this.tableLayoutPanel1 = new System.Windows.Forms.TableLayoutPanel();
            this.panel1 = new System.Windows.Forms.Panel();
            this.panel2 = new System.Windows.Forms.Panel();
            this.panel3 = new System.Windows.Forms.Panel();
            this.panel4 = new System.Windows.Forms.Panel();
            this.panel5 = new System.Windows.Forms.Panel();
            this.label1 = new System.Windows.Forms.Label();
            this.label2 = new System.Windows.Forms.Label();
            this.button1 = new System.Windows.Forms.Button();
            this.yMaxValue = new System.Windows.Forms.TextBox();
            this.yMinValue = new System.Windows.Forms.TextBox();
            this.tableLayoutPanel1.SuspendLayout();
            this.panel1.SuspendLayout();
            this.panel2.SuspendLayout();
            this.panel3.SuspendLayout();
            this.panel4.SuspendLayout();
            this.panel5.SuspendLayout();
            this.SuspendLayout();
            // 
            // tableLayoutPanel1
            // 
            this.tableLayoutPanel1.ColumnCount = 5;
            this.tableLayoutPanel1.ColumnStyles.Add(new System.Windows.Forms.ColumnStyle(System.Windows.Forms.SizeType.Percent, 20F));
            this.tableLayoutPanel1.ColumnStyles.Add(new System.Windows.Forms.ColumnStyle(System.Windows.Forms.SizeType.Percent, 20F));
            this.tableLayoutPanel1.ColumnStyles.Add(new System.Windows.Forms.ColumnStyle(System.Windows.Forms.SizeType.Percent, 20F));
            this.tableLayoutPanel1.ColumnStyles.Add(new System.Windows.Forms.ColumnStyle(System.Windows.Forms.SizeType.Percent, 20F));
            this.tableLayoutPanel1.ColumnStyles.Add(new System.Windows.Forms.ColumnStyle(System.Windows.Forms.SizeType.Percent, 20F));
            this.tableLayoutPanel1.Controls.Add(this.panel1, 0, 0);
            this.tableLayoutPanel1.Controls.Add(this.panel2, 1, 0);
            this.tableLayoutPanel1.Controls.Add(this.panel3, 2, 0);
            this.tableLayoutPanel1.Controls.Add(this.panel4, 3, 0);
            this.tableLayoutPanel1.Controls.Add(this.panel5, 4, 0);
            this.tableLayoutPanel1.Dock = System.Windows.Forms.DockStyle.Fill;
            this.tableLayoutPanel1.Location = new System.Drawing.Point(0, 0);
            this.tableLayoutPanel1.Name = "tableLayoutPanel1";
            this.tableLayoutPanel1.RowCount = 1;
            this.tableLayoutPanel1.RowStyles.Add(new System.Windows.Forms.RowStyle(System.Windows.Forms.SizeType.Percent, 100F));
            this.tableLayoutPanel1.Size = new System.Drawing.Size(543, 32);
            this.tableLayoutPanel1.TabIndex = 0;
            // 
            // panel1
            // 
            this.panel1.Controls.Add(this.label1);
            this.panel1.Location = new System.Drawing.Point(3, 3);
            this.panel1.Name = "panel1";
            this.panel1.Size = new System.Drawing.Size(102, 26);
            this.panel1.TabIndex = 0;
            // 
            // panel2
            // 
            this.panel2.Controls.Add(this.yMinValue);
            this.panel2.Location = new System.Drawing.Point(111, 3);
            this.panel2.Name = "panel2";
            this.panel2.Size = new System.Drawing.Size(102, 26);
            this.panel2.TabIndex = 1;
            // 
            // panel3
            // 
            this.panel3.Controls.Add(this.label2);
            this.panel3.Location = new System.Drawing.Point(219, 3);
            this.panel3.Name = "panel3";
            this.panel3.Size = new System.Drawing.Size(102, 26);
            this.panel3.TabIndex = 2;
            // 
            // panel4
            // 
            this.panel4.Controls.Add(this.yMaxValue);
            this.panel4.Location = new System.Drawing.Point(327, 3);
            this.panel4.Name = "panel4";
            this.panel4.Size = new System.Drawing.Size(102, 26);
            this.panel4.TabIndex = 3;
            // 
            // panel5
            // 
            this.panel5.Controls.Add(this.button1);
            this.panel5.Location = new System.Drawing.Point(435, 3);
            this.panel5.Name = "panel5";
            this.panel5.Size = new System.Drawing.Size(105, 26);
            this.panel5.TabIndex = 4;
            // 
            // label1
            // 
            this.label1.AutoSize = true;
            this.label1.Location = new System.Drawing.Point(20, 8);
            this.label1.Name = "label1";
            this.label1.Size = new System.Drawing.Size(65, 12);
            this.label1.TabIndex = 0;
            this.label1.Text = "纵轴最小值";
            // 
            // label2
            // 
            this.label2.AutoSize = true;
            this.label2.Location = new System.Drawing.Point(20, 8);
            this.label2.Name = "label2";
            this.label2.Size = new System.Drawing.Size(65, 12);
            this.label2.TabIndex = 0;
            this.label2.Text = "纵轴最大值";
            // 
            // button1
            // 
            this.button1.Location = new System.Drawing.Point(15, 2);
            this.button1.Name = "button1";
            this.button1.Size = new System.Drawing.Size(75, 23);
            this.button1.TabIndex = 0;
            this.button1.Text = "确定";
            this.button1.UseVisualStyleBackColor = true;
            this.button1.Click += new System.EventHandler(this.button1_Click);
            // 
            // yMaxValue
            // 
            this.yMaxValue.Location = new System.Drawing.Point(1, 2);
            this.yMaxValue.Name = "yMaxValue";
            this.yMaxValue.Size = new System.Drawing.Size(100, 21);
            this.yMaxValue.TabIndex = 0;
            // 
            // yMinValue
            // 
            this.yMinValue.Location = new System.Drawing.Point(1, 2);
            this.yMinValue.Name = "yMinValue";
            this.yMinValue.Size = new System.Drawing.Size(100, 21);
            this.yMinValue.TabIndex = 0;
            // 
            // SetPicScope
            // 
            this.AutoScaleDimensions = new System.Drawing.SizeF(6F, 12F);
            this.AutoScaleMode = System.Windows.Forms.AutoScaleMode.Font;
            this.ClientSize = new System.Drawing.Size(543, 32);
            this.Controls.Add(this.tableLayoutPanel1);
            this.FormBorderStyle = System.Windows.Forms.FormBorderStyle.FixedDialog;
            this.MaximizeBox = false;
            this.Name = "SetPicScope";
            this.StartPosition = System.Windows.Forms.FormStartPosition.CenterScreen;
            this.Text = "SetPicScope";
            this.FormClosing += new System.Windows.Forms.FormClosingEventHandler(this.SetPicScope_FormClosing);
            this.Load += new System.EventHandler(this.SetPicScope_Load);
            this.tableLayoutPanel1.ResumeLayout(false);
            this.panel1.ResumeLayout(false);
            this.panel1.PerformLayout();
            this.panel2.ResumeLayout(false);
            this.panel2.PerformLayout();
            this.panel3.ResumeLayout(false);
            this.panel3.PerformLayout();
            this.panel4.ResumeLayout(false);
            this.panel4.PerformLayout();
            this.panel5.ResumeLayout(false);
            this.ResumeLayout(false);

        }

        #endregion

        private System.Windows.Forms.TableLayoutPanel tableLayoutPanel1;
        private System.Windows.Forms.Panel panel1;
        private System.Windows.Forms.Panel panel2;
        private System.Windows.Forms.Panel panel3;
        private System.Windows.Forms.Panel panel4;
        private System.Windows.Forms.Panel panel5;
        private System.Windows.Forms.Label label1;
        private System.Windows.Forms.TextBox yMaxValue;
        private System.Windows.Forms.Label label2;
        private System.Windows.Forms.TextBox yMinValue;
        private System.Windows.Forms.Button button1;
    }
}
