# Supplementary material
Source: MDPI journal article supplement (https://www.mdpi.com/2077-1312/10/8/1051)
Supplement: s1 [file s1 › OSNSystem/OSNSystem/OSNSystem/ShowCTDFigure.Designer.cs]

namespace OSNSystem
{
    partial class ShowCTDFigure
    {
        /// <summary>
        /// Required designer variable.
        /// </summary>
        private System.ComponentModel.IContainer components = null;

        /// <summary>
        /// Clean up any resources being used.
        /// </summary>
        /// <param name="disposing">true if managed resources should be disposed; otherwise, false.</param>
        protected override void Dispose(bool disposing)
        {
            if (disposing && (components != null))
            {
                components.Dispose();
            }
            base.Dispose(disposing);
        }

        #region Windows Form Designer generated code

        /// <summary>
        /// Required method for Designer support - do not modify
        /// the contents of this method with the code editor.
        /// </summary>
        private void InitializeComponent()
        {
            this.checkBox1 = new System.Windows.Forms.CheckBox();
            this.checkBox2 = new System.Windows.Forms.CheckBox();
            this.checkBox3 = new System.Windows.Forms.CheckBox();
            this.checkBox4 = new System.Windows.Forms.CheckBox();
            this.button1 = new System.Windows.Forms.Button();
            this.SuspendLayout();
            // 
            // checkBox1
            // 
            this.checkBox1.AutoSize = true;
            this.checkBox1.Location = new System.Drawing.Point(21, 25);
            this.checkBox1.Name = "checkBox1";
            this.checkBox1.Size = new System.Drawing.Size(84, 16);
            this.checkBox1.TabIndex = 0;
            this.checkBox1.Text = "电导率曲线";
            this.checkBox1.UseVisualStyleBackColor = true;
            // 
            // checkBox2
            // 
            this.checkBox2.AutoSize = true;
            this.checkBox2.Location = new System.Drawing.Point(21, 61);
            this.checkBox2.Name = "checkBox2";
            this.checkBox2.Size = new System.Drawing.Size(72, 16);
            this.checkBox2.TabIndex = 1;
            this.checkBox2.Text = "温度曲线";
            this.checkBox2.UseVisualStyleBackColor = true;
            // 
            // checkBox3
            // 
            this.checkBox3.AutoSize = true;
            this.checkBox3.Location = new System.Drawing.Point(21, 97);
            this.checkBox3.Name = "checkBox3";
            this.checkBox3.Size = new System.Drawing.Size(72, 16);
            this.checkBox3.TabIndex = 2;
            this.checkBox3.Text = "深度曲线";
            this.checkBox3.UseVisualStyleBackColor = true;
            // 
            // checkBox4
            // 
            this.checkBox4.AutoSize = true;
            this.checkBox4.Location = new System.Drawing.Point(21, 133);
            this.checkBox4.Name = "checkBox4";
            this.checkBox4.Size = new System.Drawing.Size(72, 16);
            this.checkBox4.TabIndex = 3;
            this.checkBox4.Text = "盐度曲线";
            this.checkBox4.UseVisualStyleBackColor = true;
            // 
            // button1
            // 
            this.button1.FlatStyle = System.Windows.Forms.FlatStyle.Flat;
            this.button1.ForeColor = System.Drawing.Color.FromArgb(((int)(((byte)(0)))), ((int)(((byte)(192)))), ((int)(((byte)(192)))));
            this.button1.Location = new System.Drawing.Point(21, 169);
            this.button1.Name = "button1";
            this.button1.Size = new System.Drawing.Size(75, 23);
            this.button1.TabIndex = 4;
            this.button1.Text = "显示";
            this.button1.UseVisualStyleBackColor = true;
            this.button1.Click += new System.EventHandler(this.button1_Click);
            // 
            // ShowCTDFigure
            // 
            this.AutoScaleDimensions = new System.Drawing.SizeF(6F, 12F);
            this.AutoScaleMode = System.Windows.Forms.AutoScaleMode.Font;
            this.ClientSize = new System.Drawing.Size(124, 204);
            this.Controls.Add(this.button1);
            this.Controls.Add(this.checkBox4);
            this.Controls.Add(this.checkBox3);
            this.Controls.Add(this.checkBox2);
            this.Controls.Add(this.checkBox1);
            this.MaximizeBox = false;
            this.MinimizeBox = false;
            this.Name = "ShowCTDFigure";
            this.StartPosition = System.Windows.Forms.FormStartPosition.CenterScreen;
            this.Text = "显示设置";
            this.ResumeLayout(false);
            this.PerformLayout();

        }

        #endregion

        private System.Windows.Forms.CheckBox checkBox1;
        private System.Windows.Forms.CheckBox checkBox2;
        private System.Windows.Forms.CheckBox checkBox3;
        private System.Windows.Forms.CheckBox checkBox4;
        private System.Windows.Forms.Button button1;
    }
}
