# Supplementary material
Source: MDPI journal article supplement (https://www.mdpi.com/2077-1312/10/8/1051)
Supplement: s1 [file s1 › OSNSystem/OSNSystem/~WRL2874.tmp]

faultcode故障码表

| 字段名 | 定义 | 备注 |  |
| --- | --- | --- | --- |
| id | 自增长 | 主键 |  |
| faultname | Vchar(100) | 故障名称 |  |
| faulthead | Vchar(100) | 故障码 |  |

faultdata故障信息表（该表不是接收到下位机发送的协议后进行存储的，而是预先存储）

| 字段名 | 定义 | 备注 |  |
| --- | --- | --- | --- |
| id | 自增长 | 主键 |  |
| protocolname | Vchar(45) | 协议名 |  |
| Protocolid | Vchar(45) | 协议编号 |  |
| protocolinfo | Vchar(450) | 协议格式 |  |
| protocolmeaning | Vchar(600) | 协议具体解释 |  |

sensorData 采集值（完成存储，解析的过程中进行存储）

| 字段名 | 定义 | 备注 | 对应程序变量 |
| --- | --- | --- | --- |
| Id | 自增长 | 主键 |  |
| platname | Vchar(45) | 平台名/传感器名称 | sensorType |
| sensorid | Vchar(45) | 传感器编号 | sensorContentID |
| collectname | Vchar(45) | 采集值名称 | 暂定为‘AD采样值’ |
| collectdata | Vchar(45) | 采集值 | sensorContentData |
| collectfrequency | Vchar(45) | 采样频率 | sensorFrequency |
| collectdate | Datetime | 采集时间 | collectTime1 |
| savedate | Datetime | 保存到数据库时间 | dt |
| collectrawinfo | Vchar(200) | 原始数据包 | 完整数据包存储 |

faultbaseInfo 故障基本信息表（预先存储，存储后读库中的数据）

| 字段名 | 定义 | 备注 |  |
| --- | --- | --- | --- |
| Id | 自增长 | 主键 |  |
| faultid | Vchar(45) | 故障编号 |  |
| faultinfo | Vchar(200) | 故障含义 |  |

faultInfo 故障信息表（收到故障信息，故障解析的过程中进行存储）

| 字段名 | 定义 | 备注 |  |
| --- | --- | --- | --- |
| Id | 自增长 | 主键 |  |
| faultid | Vchar(45) | 故障编号 |  |
| faultinfo | Vchar(200) | 故障含义 |  |
| collectdate | Datetime | 采集时间 |  |
| savedate | Datetime | 保存到数据库时间 |  |
| collectrawinfo | Vchar(200) | 原始数据包 |  |
| faultdata | Vchar(200) | 报警数据 |  |

返回码信息表

Returninfo（预先存储，并不是将每次的返回码存到数据库）

| 字段名 | 定义 | 备注 |  |
| --- | --- | --- | --- |
| Id | 自增长 | 主键 |  |
| codeid | Vchar(45) | 返回码编号 |  |
| codeinfo | Vchar(200) | 返回码含义 |  |
|  |  |  |  |
|  |  |  |  |
|  |  |  |  |

传感器电参数表（自己添加的表格）（完成存储）

sensorelectrical

| 字段名 | 定义 | 备注 |  |
| --- | --- | --- | --- |
| Id | 自增长 | 主键 |  |
| sensortype | Vchar(45) | 传感器类型 |  |
| current | Vchar(45) | 电流值 |  |
| voltage | Vchar(45) | 电压值 |  |
| power | Vchar(45) | 功率值 |  |

舱内环境参数存储表格

cabinenvironment（完成存储）

| 字段名 | 定义 | 备注 |  |
| --- | --- | --- | --- |
| Id | 自增长 | 主键 |  |
| temperature | Vchar(45) | 温度 |  |
| lf | Vchar(45) | 前端盖漏水值 |  |
| lb | Vchar(45) | 后端盖漏水值 |  |
