# Supplementary material
Source: MDPI journal article supplement (https://www.mdpi.com/2077-1312/10/8/1051)

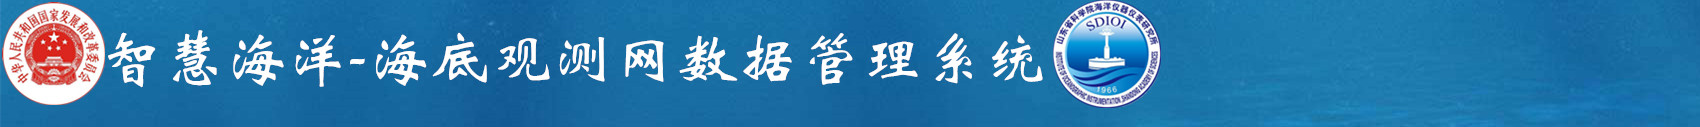

Supplement: s1 [file s1 › DMS/DMS/bin/Debug/▒Ω╠Γ└╕_5.jpg]
